# Supplementary material for: Paramutation-like Epigenetic Conversion by piRNA at the Telomere of Drosophila virilis
Source: MDPI journal article supplement (doi:10.3390/biology11101480), 2022-10-09
Supplement: s1 [file s1]

**Table 1.**  
**Determinants of *cdi* expression Experiment A**

Call:

```
lm(formula = 2^(DaughterRP49_CT - DaughterCDI_CT) ~ Plate + Control,
    data = studydesigna)
```

Residuals:

| Min       | 1Q        | Median    | 3Q       | Max      |
|-----------|-----------|-----------|----------|----------|
| -0.003321 | -0.001326 | -0.000231 | 0.001117 | 0.005916 |

Coefficients:

|                    | Estimate   | Std. Error | t value | Pr(> t )     |
|--------------------|------------|------------|---------|--------------|
| (Intercept)        | 0.0039343  | 0.0003965  | 9.923   | 1.78e-15 *** |
| PlateB             | 0.0002269  | 0.0005207  | 0.436   | 0.66417      |
| PlateC             | -0.0015111 | 0.0005207  | -2.902  | 0.00482 **   |
| ControlControl_160 | -0.0017664 | 0.0006114  | -2.889  | 0.00500 **   |
| ControlControl_9   | 0.0044380  | 0.0006114  | 7.259   | 2.52e-10 *** |

---

Signif. codes: 0 '\*\*\*' 0.001 '\*\*' 0.01 '\*' 0.05 '.' 0.1 ' ' 1

Residual standard error: 0.00193 on 78 degrees of freedom  
(1 observation deleted due to missingness)

Multiple R-squared: 0.5173, Adjusted R-squared: 0.4926

### Determinants of *cdi* expression Experiment B

Call:

```
lm(formula = 2^(DaughterRP49_CT - DaughterCDI_CT) ~ Plate + Control,
    data = studydesignb)
```

Residuals:

| Min        | 1Q         | Median     | 3Q        | Max       |
|------------|------------|------------|-----------|-----------|
| -0.0032843 | -0.0011427 | -0.0001337 | 0.0013193 | 0.0034943 |

Coefficients:

|                    | Estimate   | Std. Error | t value | Pr(> t )     |
|--------------------|------------|------------|---------|--------------|
| (Intercept)        | 0.0036045  | 0.0003286  | 10.968  | < 2e-16 ***  |
| PlateE             | 0.0010256  | 0.0004366  | 2.349   | 0.021309 *   |
| PlateF             | -0.0005231 | 0.0004366  | -1.198  | 0.234397     |
| ControlControl_160 | -0.0020523 | 0.0005165  | -3.973  | 0.000156 *** |
| ControlControl_9   | 0.0065048  | 0.0005165  | 12.593  | < 2e-16 ***  |

---

Signif. codes: 0 '\*\*\*' 0.001 '\*\*' 0.01 '\*' 0.05 '.' 0.1 ' ' 1

Residual standard error: 0.001633 on 79 degrees of freedom  
Multiple R-squared: 0.7262, Adjusted R-squared: 0.7123  
F-statistic: 52.38 on 4 and 79 DF, p-value: < 2.2e-16

F-statistic: 20.9 on 4 and 78 DF, p-value: 9.743e-12

|                  |           |           |       |         |
|------------------|-----------|-----------|-------|---------|
| GrandmotherID9_4 | 1.993e-03 | 1.290e-03 | 1.546 | 0.12679 |
| GrandmotherID9_5 | NA        | NA        | NA    | NA      |

---

Signif. codes: 0 '\*\*\*' 0.001 '\*\*' 0.01 '\*' 0.05 '.' 0.1 ' ' 1

Residual standard error: 0.001579 on 69 degrees of freedom  
Multiple R-squared: 0.7764, Adjusted R-squared: 0.7311  
F-statistic: 17.12 on 14 and 69 DF, p-value: < 2.2e-16

### Determinants of *cdi* expression Experiment A and B combined

Call:

lm(formula = 2^(DaughterRP49\_CT - DaughterCDI\_CT) ~ Experiment +  
Plate + Control, data = studydesign\_ab)

Residuals:

|  | Min        | 1Q         | Median     | 3Q        | Max       |
|--|------------|------------|------------|-----------|-----------|
|  | -0.0042229 | -0.0012463 | -0.0001406 | 0.0011827 | 0.0050139 |

Coefficients: (1 not defined because of singularities)

|                    | Estimate   | Std. Error | t value | Pr(> t )     |
|--------------------|------------|------------|---------|--------------|
| (Intercept)        | 0.0038021  | 0.0003616  | 10.516  | < 2e-16 ***  |
| ExperimentB        | -0.0005938 | 0.0004901  | -1.212  | 0.22744      |
| PlateB             | 0.0002317  | 0.0004901  | 0.473   | 0.63706      |
| PlateC             | -0.0015064 | 0.0004901  | -3.074  | 0.00249 **   |
| PlateD             | 0.0005231  | 0.0004856  | 1.077   | 0.28298      |
| PlateE             | 0.0015487  | 0.0004856  | 3.189   | 0.00172 **   |
| PlateF             | NA         | NA         | NA      | NA           |
| ControlControl_160 | -0.0019082 | 0.0004066  | -4.694  | 5.76e-06 *** |
| ControlControl_9   | 0.0054725  | 0.0004066  | 13.461  | < 2e-16 ***  |

---

Signif. codes: 0 '\*\*\*' 0.001 '\*\*' 0.01 '\*' 0.05 '.' 0.1 ' ' 1

Residual standard error: 0.001817 on 159 degrees of freedom

(1 observation deleted due to missingness)

Multiple R-squared: 0.6206, Adjusted R-squared: 0.6039

F-statistic: 37.16 on 7 and 159 DF, p-value: < 2.2e-16

### Determinants of *cdi* expression among cousins explained by Grandmother ID

Call:

lm(formula = 2^(DaughterRP49\_CT - DaughterCDI\_CT) ~ Experiment +  
Plate + GrandmotherID, data = cdi\_setAB\_test)

Residuals:

|  | Min        | 1Q         | Median     | 3Q        | Max       |
|--|------------|------------|------------|-----------|-----------|
|  | -0.0030594 | -0.0010731 | -0.0000169 | 0.0009268 | 0.0034575 |

Coefficients: (2 not defined because of singularities)

|                   | Estimate   | Std. Error | t value | Pr(> t )     |
|-------------------|------------|------------|---------|--------------|
| (Intercept)       | 4.885e-03  | 5.617e-04  | 8.696   | 5.07e-14 *** |
| ExperimentB       | -1.077e-03 | 7.709e-04  | -1.397  | 0.16535      |
| PlateB            | 2.140e-04  | 4.957e-04  | 0.432   | 0.66677      |
| PlateC            | -1.281e-03 | 4.957e-04  | -2.584  | 0.01114 *    |
| PlateD            | 2.565e-04  | 4.888e-04  | 0.525   | 0.60079      |
| PlateE            | 1.148e-03  | 4.888e-04  | 2.349   | 0.02068 *    |
| PlateF            | NA         | NA         | NA      | NA           |
| GrandmotherID15_B | -1.749e-03 | 6.310e-04  | -2.772  | 0.00660 **   |
| GrandmotherID20_  | -2.946e-04 | 6.457e-04  | -0.456  | 0.64915      |
| GrandmotherID22_  | -1.993e-03 | 6.457e-04  | -3.086  | 0.00259 **   |

|                  |            |           |        |            |
|------------------|------------|-----------|--------|------------|
| GrandmotherID34_ | -6.397e-04 | 6.457e-04 | -0.991 | 0.32416    |
| GrandmotherID36_ | -3.392e-04 | 6.310e-04 | -0.538 | 0.59199    |
| GrandmotherID39_ | 1.476e-05  | 6.310e-04 | 0.023  | 0.98138    |
| GrandmotherID6_  | -2.109e-03 | 6.457e-04 | -3.267 | 0.00147 ** |
| GrandmotherID7_  | -4.483e-04 | 6.310e-04 | -0.710 | 0.47905    |
| GrandmotherID8_  | NA         | NA        | NA     | NA         |

---

Signif. codes: 0 '\*\*\*' 0.001 '\*\*' 0.01 '\*' 0.05 '.' 0.1 ' ' 1

## Table 2.

### Adjusted p-value after Tukey Test (Determinants of *cdi* expression among cousins explained by Grandmother ID

Tukey multiple comparisons of means  
95% family-wise confidence level

Fit: aov(formula = grandmother\_corr)

\$Experiment

|     | diff         | lwr          | upr          | p adj     |
|-----|--------------|--------------|--------------|-----------|
| B-A | 0.0002729953 | -0.000288933 | 0.0008349236 | 0.3376159 |

\$Plate

|     | diff          | lwr           | upr           | p adj     |
|-----|---------------|---------------|---------------|-----------|
| B-A | 2.670467e-04  | -0.0011704893 | 1.704583e-03  | 0.9944024 |
| C-A | -1.227846e-03 | -0.0026653823 | 2.096897e-04  | 0.1396734 |
| D-A | -5.374255e-04 | -0.0019749615 | 9.001105e-04  | 0.8862266 |
| E-A | 3.543160e-04  | -0.0010832200 | 1.791852e-03  | 0.9796763 |
| F-A | -7.939749e-04 | -0.0022315109 | 6.435611e-04  | 0.5981907 |
| C-B | -1.494893e-03 | -0.0029138794 | -7.590667e-05 | 0.0327649 |
| D-B | -8.044722e-04 | -0.0022234585 | 6.145142e-04  | 0.5703896 |
| E-B | 8.726929e-05  | -0.0013317171 | 1.506256e-03  | 0.9999742 |
| F-B | -1.061022e-03 | -0.0024800080 | 3.579648e-04  | 0.2603232 |
| D-C | 6.904209e-04  | -0.0007285655 | 2.109407e-03  | 0.7194194 |
| E-C | 1.582162e-03  | 0.0001631760  | 3.001149e-03  | 0.0195966 |
| F-C | 4.338714e-04  | -0.0009851150 | 1.852858e-03  | 0.9487051 |
| E-D | 8.917415e-04  | -0.0005272449 | 2.310728e-03  | 0.4547915 |
| F-D | -2.565495e-04 | -0.0016755358 | 1.162437e-03  | 0.9950692 |
| F-E | -1.148291e-03 | -0.0025672773 | 2.706955e-04  | 0.1841580 |

\$GrandmotherID

|           | diff          | lwr           | upr           | p adj     |
|-----------|---------------|---------------|---------------|-----------|
| 15_B-15_A | -2.266551e-03 | -4.352390e-03 | -1.807116e-04 | 0.0220415 |
| 20_-15_A  | -2.914099e-04 | -2.377249e-03 | 1.794429e-03  | 0.9999864 |
| 22_-15_A  | -1.989867e-03 | -4.075706e-03 | 9.597273e-05  | 0.0747335 |
| 34_-15_A  | -6.364523e-04 | -2.722292e-03 | 1.449387e-03  | 0.9924638 |
| 36_-15_A  | -8.566950e-04 | -2.942534e-03 | 1.229144e-03  | 0.9449060 |
| 39_-15_A  | -5.026921e-04 | -2.588532e-03 | 1.583147e-03  | 0.9987413 |
| 6_-15_A   | -2.106225e-03 | -4.192064e-03 | -2.038514e-05 | 0.0457686 |
| 7_-15_A   | -9.657149e-04 | -3.051554e-03 | 1.120125e-03  | 0.8905850 |
| 8_-15_A   | -5.174522e-04 | -2.603292e-03 | 1.568387e-03  | 0.9984206 |
| 20_-15_B  | 1.975141e-03  | -6.485009e-05 | 4.015132e-03  | 0.0661735 |

|          |               |               |              |           |
|----------|---------------|---------------|--------------|-----------|
| 22_-15_B | 2.766843e-04  | -1.763307e-03 | 2.316676e-03 | 0.9999895 |
| 34_-15_B | 1.630099e-03  | -4.098925e-04 | 3.670090e-03 | 0.2388298 |
| 36_-15_B | 1.409856e-03  | -6.301352e-04 | 3.449847e-03 | 0.4405956 |
| 39_-15_B | 1.763859e-03  | -2.761323e-04 | 3.803850e-03 | 0.1517309 |
| 6_-15_B  | 1.603265e-04  | -1.879665e-03 | 2.200318e-03 | 0.9999999 |
| 7_-15_B  | 1.300836e-03  | -7.391551e-04 | 3.340827e-03 | 0.5584321 |
| 8_-15_B  | 1.749099e-03  | -2.908923e-04 | 3.789090e-03 | 0.1599754 |
| 22_-20_  | -1.698457e-03 | -3.738448e-03 | 3.415344e-04 | 0.1908050 |
| 34_-20_  | -3.450424e-04 | -2.385034e-03 | 1.694949e-03 | 0.9999306 |
| 36_-20_  | -5.652851e-04 | -2.605276e-03 | 1.474706e-03 | 0.9963059 |
| 39_-20_  | -2.112822e-04 | -2.251273e-03 | 1.828709e-03 | 0.9999990 |
| 6_-20_   | -1.814815e-03 | -3.854806e-03 | 2.251766e-04 | 0.1257375 |
| 7_-20_   | -6.743050e-04 | -2.714296e-03 | 1.365686e-03 | 0.9866795 |
| 8_-20_   | -2.260422e-04 | -2.266033e-03 | 1.813949e-03 | 0.9999982 |
| 34_-22_  | 1.353414e-03  | -6.865768e-04 | 3.393406e-03 | 0.5009180 |
| 36_-22_  | 1.133172e-03  | -9.068195e-04 | 3.173163e-03 | 0.7363626 |
| 39_-22_  | 1.487175e-03  | -5.528166e-04 | 3.527166e-03 | 0.3625166 |
| 6_-22_   | -1.163579e-04 | -2.156349e-03 | 1.923633e-03 | 1.0000000 |
| 7_-22_   | 1.024152e-03  | -1.015839e-03 | 3.064143e-03 | 0.8339458 |
| 8_-22_   | 1.472415e-03  | -5.675767e-04 | 3.512406e-03 | 0.3769101 |
| 36_-34_  | -2.202427e-04 | -2.260234e-03 | 1.819748e-03 | 0.9999986 |
| 39_-34_  | 1.337602e-04  | -1.906231e-03 | 2.173751e-03 | 1.0000000 |
| 6_-34_   | -1.469772e-03 | -3.509763e-03 | 5.702190e-04 | 0.3795146 |
| 7_-34_   | -3.292626e-04 | -2.369254e-03 | 1.710729e-03 | 0.9999533 |
| 8_-34_   | 1.190002e-04  | -1.920991e-03 | 2.158991e-03 | 1.0000000 |
| 39_-36_  | 3.540029e-04  | -1.685988e-03 | 2.393994e-03 | 0.9999138 |
| 6_-36_   | -1.249530e-03 | -3.289521e-03 | 7.904617e-04 | 0.6146522 |
| 7_-36_   | -1.090199e-04 | -2.149011e-03 | 1.930971e-03 | 1.0000000 |
| 8_-36_   | 3.392429e-04  | -1.700748e-03 | 2.379234e-03 | 0.9999398 |
| 6_-39_   | -1.603532e-03 | -3.643524e-03 | 4.364587e-04 | 0.2594949 |
| 7_-39_   | -4.630228e-04 | -2.503014e-03 | 1.576968e-03 | 0.9992180 |
| 8_-39_   | -1.476005e-05 | -2.054751e-03 | 2.025231e-03 | 1.0000000 |
| 7_-6_    | 1.140510e-03  | -8.994815e-04 | 3.180501e-03 | 0.7291068 |
| 8_-6_    | 1.588772e-03  | -4.512188e-04 | 3.628764e-03 | 0.2714539 |
| 8_-7_    | 4.482627e-04  | -1.591728e-03 | 2.488254e-03 | 0.9993971 |

**Table 3.**

**Effect of mother *cdi* expression to *cdi* daughter expression**

Call:

```
lm(formula = DaughterExpression ~ Experiment + Plate + GrandmotherID +
    MotherExpression, data = cdi_expression_testonly)
```

Residuals:

| Min       | 1Q        | Median    | 3Q       | Max      |
|-----------|-----------|-----------|----------|----------|
| -0.003064 | -0.001082 | -0.000030 | 0.000949 | 0.003456 |

Coefficients: (2 not defined because of singularities)

|             | Estimate   | Std. Error | t value | Pr(> t )     |
|-------------|------------|------------|---------|--------------|
| (Intercept) | 4.880e-03  | 8.017e-04  | 6.087   | 1.99e-08 *** |
| ExperimentB | -1.062e-03 | 8.915e-04  | -1.191  | 0.23640      |

```

PlateB      2.119e-04 5.036e-04 0.421 0.67475
PlateC      -1.325e-03 5.477e-04 -2.420 0.01727 *
PlateD      2.576e-04 4.934e-04 0.522 0.60272
PlateE      1.155e-03 5.020e-04 2.301 0.02338 *
PlateF      NA      NA      NA      NA
GrandmotherID15_B -1.749e-03 6.367e-04 -2.747 0.00711 **
GrandmotherID20_ -2.544e-04 6.987e-04 -0.364 0.71647
GrandmotherID22_ -1.934e-03 6.697e-04 -2.888 0.00472 **
GrandmotherID34_ -5.897e-04 6.725e-04 -0.877 0.38260
GrandmotherID36_ -3.318e-04 6.443e-04 -0.515 0.60770
GrandmotherID39_ 2.591e-05 6.535e-04 0.040 0.96845
GrandmotherID6_ -2.065e-03 6.855e-04 -3.013 0.00326 **
GrandmotherID7_ -4.376e-04 6.521e-04 -0.671 0.50365
GrandmotherID8_   NA      NA      NA      NA
MotherExpression -8.199e-03 1.083e-01 -0.076 0.93979
---
Signif. codes:  0 '***' 0.001 '**' 0.01 '*' 0.05 '.' 0.1 ' ' 1

```

Residual standard error: 0.00156 on 103 degrees of freedom  
 (2 observations deleted due to missingness)  
 Multiple R-squared: 0.3098, Adjusted R-squared: 0.216  
 F-statistic: 3.303 on 14 and 103 DF, p-value: 0.0002271

#### Table 4.

##### Effect of Polyphemus insertion Experiment A only

Call:  
`lm(formula = 2^(DaughterRP49_CT - DaughterCDI_CT) ~ poly_mother,`  
`data = Polyphemus_expA)`

Residuals:

| Min        | 1Q         | Median     | 3Q        | Max       |
|------------|------------|------------|-----------|-----------|
| -0.0027548 | -0.0013739 | -0.0006923 | 0.0015869 | 0.0032718 |

Coefficients:

|               | Estimate  | Std. Error | t value | Pr(> t )     |
|---------------|-----------|------------|---------|--------------|
| (Intercept)   | 0.0038408 | 0.0008383  | 4.582   | 0.000307 *** |
| poly_mother1_ | 0.0001364 | 0.0009864  | 0.138   | 0.891761     |

---  
 Signif. codes: 0 '\*\*\*' 0.001 '\*\*' 0.01 '\*' 0.05 '.' 0.1 ' ' 1

Residual standard error: 0.001874 on 16 degrees of freedom  
 (2 observations deleted due to missingness)  
 Multiple R-squared: 0.001193, Adjusted R-squared: -0.06123  
 F-statistic: 0.01912 on 1 and 16 DF, p-value: 0.8918

##### Effect of Polyphemus insertion Experiment A and Experiment B

Call:  
`lm(formula = 2^(DaughterRP49_CT - DaughterCDI_CT) ~ Experiment +`  
`Plate + poly_mother, data = polyphemus)`

Residuals:

| Min        | 1Q         | Median     | 3Q        | Max       |
|------------|------------|------------|-----------|-----------|
| -0.0027548 | -0.0013707 | -0.0003983 | 0.0015302 | 0.0032718 |

**Coefficients: (1 not defined because of singularities)**

|               | Estimate   | Std. Error | t value | Pr(> t )     |
|---------------|------------|------------|---------|--------------|
| (Intercept)   | 0.0038408  | 0.0007543  | 5.092   | 1.52e-05 *** |
| ExperimentB   | -0.0002938 | 0.0008581  | -0.342  | 0.734        |
| PlateD        | NA         | NA         | NA      | NA           |
| poly_mother1_ | 0.0001364  | 0.0008876  | 0.154   | 0.879        |

---

**Signif. codes:** 0 '\*\*\*' 0.001 '\*\*' 0.01 '\*' 0.05 '.' 0.1 ' ' 1

**Residual standard error:** 0.001687 on 32 degrees of freedom

(5 observations deleted due to missingness)

**Multiple R-squared:** 0.01528, **Adjusted R-squared:** -0.04627

**F-statistic:** 0.2483 on 2 and 32 DF, **p-value:** 0.7816
