# Supplementary material for: Paramutation-like Epigenetic Conversion by piRNA at the Telomere of Drosophila virilis
Source: MDPI journal article supplement (doi:10.3390/biology11101480), 2022-10-09
Supplement: s1 [file s1]

>Ref\_Ulysses

TGTTGCATTTGACGTTATCGGCAGCACCGAGGGTTACTCAGTTGGTTGCGTGCGATATTATGGGGCCACTGC  
CGATATCTTTTTTGGCATATGGTCGGAGTATGCCGGGTGAAGCTGGGGCCACGGCGGACGCAAAATTTTGA  
AGGGTGGCAACGCCAGACATGCGATCCACGGCGCCAAAAGCGACGATTGCTATTGGCCGCCCGTTTCGCT  
CTTAAAGGGAATACGAGGAGAGTGGATCGCATGCCCTTGGATATGCCCTTGGCCTTCATTTGGGGCCGTTG  
ACCCAAAAAAATGCAGCTGTGCAGATGAGCAGCAACGGTGCCCGCCTCGCAAATGTATGCGTGTGCCGAA  
ATTCGGCACCGATGGTGTGGCTGAAAAAAATGTTCGAGGAGTTCGATTTGTTTCAGCGGTTAACGGCGGGC  
GTGCCAGCTCGAAGTGAGCAAAAAAGTTGGACATTGCATTTCTGCTTGACAGAGTAAAATTTTTTCCCTTC  
TGAAAAATTAAGCCGGCACATAATACCAATGGCTTAACAGACGAATAAAAGTTTTGTTTTTTGTGTTCTTTG  
CCATGTAATAAATTTATATAAATCAAACCGCTCGAATCACAAAGAAAATATAATAAAAAAATTGAAAGAG  
ACTTAAAAATTTAAGTTGCGACGAGAGACGAACCAATAAGCCAAAAATTAACGGCTCCGGCACCAAGG  
AGACCGGCTCGCGCACCAAGAGAGGGCCACGAAATATTCAAGGCCAGGATTCAGTGCAGCGGCGCAAACC  
AGCCATATCCGCGACGTCCGCCAGCAAGCGTCGGCGCAAACGTGAAGGCGACGAGACGAGCCACCAACG  
ACCGGGCTCCAACAACGAAGAAGTCGGTCCACAGGCGTAGACCCCGGTCCCACATCCACCGTAGTGAGTC  
CGTTCCATTGTTCTGGCCCATCCCTCGGTTTCGAGCCCCTGGCATGAGTTCAGAAGAATTGACTCCTAATTG  
CACTCCCTGAAAAGGAGTAGATTTTTTTTTTATCGTTAAATTTGGTTAATTTGTATTTATAAAATATATTCAT  
ACATACATAGGCACTTACGCCGAGCTTCACTTTAGAGTGCGAGCGGTGAGGAAAACCTCCAACGGTGATGC  
ATCTGCGCCTGTAAAATAAAAAAAAAAAAAAAAAAATCTAAAATTAACCTTTGCGCGAACTATGCTCACATAC  
TTACCTAATTTGAATTTACGCATTTATATCGCCCCTTACCACCCCCCAGAGAGCTCTTTAGGTAGGGTAAG  
GTAGAATTAAGCGATTTAATACATACAATACACAATACGTGACATACCCAGTTTTTAAGTAATTGTGCGGG  
CCATTGTTCTTAAATCGGGGCAACGATTGCCTCTAAAGTGCCTCATTGCGCGTTTCTTTTGGCGCGACTAG  
CCAATATCCTTGTAGTGTTTCGTGCGCTGTTCCGTTCAAGTGTGTAATAAAAAAAAAAAAAAAAAAATTAATTCT  
ATAAGATAAGAGAAAAATTTAGGAATTAATGCGCTGTGTCAATTAGTATAAGTATATGCAGCAGTAATAC  
GCACCTGTGAAGTTAATGAATTATCCGCTTGATGAGATCCTGAACAGCTGCAAGATAAATGCCATAAGC  
AATGATTATGATTGTTATACATTTTAAGAAAACGCAACCAATTATACGCACCTATTGAAAGAAATCATGTC  
CGGCTAAAATAATATTGCTGGGGAGAGTGGGCATTATGGCCGACACGGGCTAATATAGGCCATTTGGTGG  
CCAAAATGAGGGAGACGAGTGGAGGTGATCGTCTCATGGTAGGGCGGGTACGCTGGGTCCGGAACCGGG  
GCCCGATCTGGAAGAGTAAGGTGGATAAATAGTGTTTTTTTTTTGTTAATTTATATTGAGTGTCTTACCTTTG  
TTGTTTACATTTTCATAGTTGTTACAGCTGTGGATTTTGTTCATGAGTTAGTAGTTCCGAATATTTGTTATC  
GATTATGCGGTTCAATTTTGAGTAGTGTTGTGTGAGTCTATTTTGCTACAGACGTGTAGCTTTGTTGTTATCG  
ATTGTGCGGACTGCGGGCCAGGGATGGGACCACACCCAGAGAATCCGATGAGCCAGCCGGCGCGGCCCA  
CTGAGAAACAAGCAGTTCCCTAACAATATGGCGCCCAAATTGAAGAAGCACTCGGCTTCTTTGAAGTCGG  
TGTGTAATCAAAGAAAAATAAATACGATAAAAATGAAGGTACAGAGGAAAGGACTCCCTTGGCTTCAGG  
ACCCACACCGCTGAAGTCTTATGTGCGCAGAGTAGGTAGCTCATAATGCGCACGGTGTAGTGGAATCCG  
AGAAGCACGACGGAAGTAGAGGTTATCTGAATATCCATCCATAAGCATGAGGGGTTTTTTTTTGTAGTGGT  
TGATGGCCGTTTCGCATGTTGGCGAAACATTTGCGACTATCCATCGTTTCGCTGGTGGTAGCCGCAACGACA  
AAGGCATCTCATGGTTAAAAAAATGTGATATTAGGGTAGTTTAGTCAGATGTTATTTATTCAATTAGTTGT  
TTTTGTCTCATTTTGTGTTAATGTTGATGTATGCTGGCCGTAGTTATACGAGCTTCGGAGACCGGTTGACCC  
AGACGATATAGAGCCGAGCCTGCGCCGCATCTGTACACAGCATATCCCAAGAATGGCCAGAAGAGCGA  
CGGAGAACGGATCTTGCCATGGTGTCCATTGACATGGGGTGTTTTCTTGTGCGGTTGATGACTGGTAAGT  
CACGTTTGCTAGTTGGTGAACGTTTCGCGACCGTCAATCGTAGCCTGGTGGTAGCCGCCATGACAAAATAA  
CCTGTGAACGAAATGTGATATTAGGGTAGGTCTGACTAGAGTTTGTTTAATGTTTTTCAATTTGTTTTGTCCC  
ACTCTGTGTTAACGTTTGGTGTGTGCTGGCCGTAGTTAAATGAGCTTCGGAGGCAGGTGACCCAGGACGA  
TATAGAGCCGATCCTGGCGCCGCACCTGTCACGCAGCATACTCTAAGGGTGCACAGAAGTGCGACAGAAA  
CCAATAGCCTTCAAGGTAGCGTTCCTTGCATGCCGTCCGTCAGTCAAACCTGACGAACTGAGCATGGGACG  
AATGCCTTAAGTGTTGTCCACTGTCCAGATTATGCGTAGATTATTTAGCCTGTGTTAGGATTTGTCGTCTCT  
CCCCAAGTATTTGAAATTAATTAGAAAGAAAAACAAATTTTTGTGAAGTGGTTTTTGTGGATCAATGTGTA  
TTAATTTATTATTCTTTATTAGTAAGATTTGTTAGTGGGATGTTTATTTATTTATTAATTTATTAGAAATATT  
AGTAAAGTTTTTATAAGGGTTGTACGCCCTGTAGAAGATAGGGGGTACTGTTCTCAGAAGGAATAAGTAT  
GGCTGAGAAACAGGTGTCTGATTGGGCTTCTGACGACTGATGGGGCGTCGCTCTGCCACCGCCGAGCCCA  
GCTGGAGGGCTGGTGCGAACGCCAATGAATTTCCGGGGAGTTTAATGAGAGAGACAGATCCCTGTAAAG  
GAGGGTCACCTGGTAGACTTGGAGGAAAGAATTGGCGCAACAGCCTAGACCTCCACGGAACCTGGAGTTC  
CCAAAAGCCCCGAAAGACTCAGTGCTCAAATCCGGCGGGCAAACGCGGCGATCGCTCAGGCCACCAAG

GATATCTGCATGCTCTGCCATCTGGCATCAGCGAGTCCATCCGCGAGGAGATGCGAGCTGGCTTCATGGA  
AATGATGAAGGGCATCCATTGATGTGCTTAGGCCGCCAGGGAGCCAAACCCGCCGAACTAACACTGCGC  
CGAAGCCGCCAAGGACATGTCTGAGCCGGGACCGCGAACAGGCGCCATCCCGAAAGAACGGAAGTGTTCC  
AGCGCGAGCATTCCACCACCGTGCCACCGAAGCCACGTAGGCAAGCGCACAGGGCGGAGTATTCGTCCA  
GCAGCCCAGTTTACGTGGCAGATGCTCAGTCGAGGAACTGGCGTAACCCGAATAACCGCCATTTCGAGT  
AGAGGACCGGAGAGCGGATGATTTTCAACCGGAGGAGGCGTACGCCAACGTGCGAGAACTGCGTACAT  
GAAGCTCGAGCGGTGGAACGTCAAGTTTGACGGCGAGGACGCGATGAATTCGGTCGAGGACTTCGTGTTT  
CGCCTAGAGTTTCTGAGAGGACAGTATCAGTGCCCGTGGAAGGAGGTCCTGCGCGGTTTCCACCTGCTCCT  
GACCGGCCGCGCCCGCGAGTGGTACTGGATGCACGTGCGGCATTCTAGGGTCGACAGCTGGATGCAACTG  
CGGCATGCCCTCTTGACAGGTTCCGGGGCTACCAGACGGAACACGAGGTAATGCAGGAGCTTCTACAAC  
GAGAGCAACAGGCCAGCGAAGGGGTGGATGATTATATCCACCACATGCGTCAACTCGCCGCGCGATTCCA  
GAAGCCGCTGAGAGACCGAGAGCTGGTGAGGATTATAAAGCGTGTTTAAAAGAAAGTCTGGCGAAATA  
TATTTATGCCATGGACGTACTCACCGTGGATGAGCTGCGCCAAGAGTGCCTAGAAGTGAGAGGACATG  
GGTCGCAGAAGCCGGACTGGGTACCTTCAGCCGTCGCGTTGTCCACAAGGAACGAGGCCCCGTAGTCCACG  
AGGTTGAAGTTCCACCGCATCTTACAGAAACGCCACCGGGAGAACTGGAGGAGGCATTCGTGCGAACGA  
GGAATCATCCGAATTGTATGCTGGAACCTCGAGACAGTTCGACCACGTCTTTAGAGACTGCCTGTCCAAG  
GAGCGGAAAATATTCTGCTATAGGTGTGGAAGCCGGACACGTTCTGCTCGCAGTGTGAAAACCTGTCCGG  
GAAACCCAGAGGGAGCGCGGTGATGGCGGGACAGACGCGTTCCGGGACGGCGACCGCGGGAAAGCAG  
GAGAGGGGCACCTACCAGAGCCAATAATCATTGGAAGGAGACGGAGATTTGGAATAAGGATCAGGATA  
AGGCTAATTATAATAAGTATAAGCAAAGGAGGAACACTTAGGGGCTTACCATACGAAGAACGTGTTTCG  
GGCATAACATGTCGGCCCCGAAATAGAATTTTTGGTGAGCGACAGCTGGAGGGGATGACGCTAGCCACCCGG  
AGAATGGTGAAGGCACGTGCGCGCTTCCGCAGACGCAGGATTACCAGGCGCCAGGTCGTGCAAGCGGTG  
AGACGGGAGGAGAGTATAGACCCACGAGTATTTCGCCGAAGTGAGGTCGCTGGAGCCAAAATGAAAGGG  
TTGCTGGACACGGGGGCTCAGTCAGTCTGTTGGGACAAGGATGCCGGGAGTTAGTGAGAAACTGGGAT  
GGGAAGCGCGGCCATACGAATCGATGGTGAGGACAGCATGCATGGGTGCCAATCGCCCAATTTTAGGTG  
CGTTGTTCTGCCTGTGAAATACGGAATAGAACGGTTAGATATCGTATTTTACATGTGCCCGGACCTGCGAC  
AGGAACTATACCTGGGAATCGACTTCTGGCGAGCCTTTGAGATCGCACCAGAGCTGCTCGGTCCGGCCAG  
AAAGTCCGAAACACCACCAGAGGCATCTGAGGTAACGGTAGCGAACCCAGAGGTGGCTTATTACCGGGA  
CGACGACGACTGCGTAACGGATCCGGAAATGTGGGACCTGGACAACGATCAGAGGAGTCAGTTGGAAAG  
CGTGAAGCGCAGATTTCTCCAATTTGAGAAGGATGGCCTAGGGAAAACCTCACCTGCTGCAGCACCGAATT  
CAGCTGATCGAGGGAGCAGAACCCGTGAAAGACAGACTTAATCCGCTGTCCCCGGCCAAACAGGAGATC  
GTGTGGGCCGAGGTGGATAAGATGCTAAAGTTGGGCATCATCGAGGAGAGTGACAGCCCCTGGAGCAAC  
CGGACGACGGTGGTGATGAGGCCTGGGAAGAACAGGTTTTGCTTAGACGCCAGGAAATTAAACAGTGTA  
ACGGTAAAAGACGCGTACCCGCTTCCATGCATCGAGGGCATCCTATCGCGATCGACGAGACTCATTTTAT  
CTCTAGCGTCGACCTTAAGTTTCGCGTTCTGGCAATAGAGATGGAGGAGAAGAGCAGGGCGTATACGGCGT  
TTACTGTACCAGGAGGCCGCTGTACCAGTTCCGCCACATGCCATTTCGGGCTCTGCAACGCCGCTCAACACT  
TCGAGGCTCATGACAAGGTAATCCCGGCGAATCTGAGGTCCAACGTATTCGTATACCTGGACGACTTGCT  
GATAATATCGGCAGATTTTCCAACGCCTTAAATACTTGAATTGGTGCCGAGTGTCTGAGGAACGCG  
AACCTCACCATAGGCATGGCGAAGTCGAAATTCCTGTTCCGCAACCTAACTACCTGGGTTTTATTCAATT  
AAGGCGGCGGACGTGGCGCATGGATCCGGGAAGGGTAGAAGCGATCCGGAACATCCCGAATCCGAGGAC  
GGTCAAGGAACTACGAAGCTTCTTAGGTACGGCGGGGTGGTACCGCCGATTCATAAAGAATTTTCGTGAG  
ATATCGGTACCGTTGACTGATGCCCTTAAGAAGAGAACGGGTAGATTTGTGTTGAGCGACGAGGCCATAG  
AAGCCATAGAGAGCTTAAAGTTAGCCCTCACCACAGCCCCGGTGTTAGTTACGCAGATTTTTCGAAGACC  
ATTCTTCATCCAATGCGACGCATCTCACTACGGAGTAGGAGCTGTGTTGTTCCAGCTAGACGACGAACAA  
CAGGAAAGGCCGATCGCATTTCTTCGGCCAACTCAACAAGCACCAGATCAACTATTCGGTGACCGAGA  
AGGAATGCCTAGCCGCCAACTGGCCATACATCGATTCCGGCCGTACGTGGAGATGATGCCGTTACGGT  
AATCACCAGATCATGCGAGTCTGCAGTGGCTTATGAGTCTCAAAGACTTGAGCGGGAGATTAGCCAGGTGG  
TCCCTCGAACTGCAAGCGTTCCCTTTCTCCATGCAGTACCGCAAGGGAGCCGACAACGTGTGCAGACACA  
TTGTCCGAAGCGTGGAAGAGGTGCAACTGACCCCGGAAGATCTGTTGGGATTTTCAGACCCCGGAGTTCTGA  
GAGTCCGAATATCGAGGAGCTGATAAGAGAGGTGATGAGCCAACAAGGGAAGTTTCCGGACCTTAGCAG  
TGGCAGGACGGACTTCTCTTCAAGAGGGACCGTGACGAGAGCTTGAGGATGAGGTCGAAGGCACAAG  
TTGGAAGCTCTGGGTGCCGGAGTCGCTGACGGCAGGACTCATCCAACAAGCGACACGGCGGACGAGACG  
CTCAGCTCATGGAGGCATGAGGAAAACGCTGCACGCGCTGGCCAGGCAATATTATTGGCCCAACATGGCC  
ATACAAGTCAGGGACTATGTTTCGGAAATGCGATACATGCAAGGAGACCAAGGCACAGAAGTACCGAATG

CAGGTCGGAATTGGGGAAGAAGTGCGCACCGACCGCCCTTCCAGAAGCTATATATCGACTTCTTGGGGA  
AGTATCCACGGTCGAAACGAGGGCATGCGTGATATTCGTCGTCGTAGACCACTTCTCGAAGTTTACCTTC  
CTGAAGGCCATGAGGGAAGCCACCGCGCGGATGTCGTGAACTTCCTAGTGCATGAGGTGTTCTTCAAAT  
TTGGCGTGCCGGAAGTGATCCATTTCGGATAATGGACGACAATTCGTGTCAAAGTCGTTTCGATGCGATGGT  
CCAGGCGTTTGGCATTACTCACCTGCGCACACCAAGTGTATTTCGCCTCAGAGCAACGCCGCCGAACGCGTG  
AACCGCACAGTGCTGTTCGGCAATCCGAACCTACCTGGGTCAGGATCATCGGGAATGGGACGCGTACCTAC  
CAGAGGTGGAAGTGGCGATCCGGAATGCGGTCCACAGCGGCTACGGGAGTCACTCCGTTCTTCGCGGTCT  
TTGGACAGCAGATGTACCTGAATGGTTCCAGTTACAACTGGCCAGGAAGCTGTAGATCATTGGCCGACC  
ACAGTATTTCTGACCTTGACGCAAAGGACAGACTGGCTGTAATCCGAAGCCAAGTCAAGGACCACCTGCA  
CACCGCATACGAGCGAAGTCGCCAACGGTACGACCACCGCGCGCCGACAGCTCCATCTGGAACCGGGAC  
AGGAAGTGTGGAGGCGCAACTTCGCACTAAGCAGCTTCGGCAAAGCCTTCAATGCCAAGTTCGCCCCGAA  
GTTCTTGAAGAGCCGCGTCGTCCGAGCCGTGGGAACCAACGCCTACGAGTTGGAAGATCTCCAGGGACGC  
GTGCTAGGCGTCTTCCACGCAAAAGATATACGAACATAATCGTAATTTGCTCACCTCCTTGCCAGGCAACG  
GCGGCGGCAGCGCCAGTCCCCCCCCCTTTTTTTTTTGGGTCAGCAAAAAAAAAAAAAAAAAATATAGATTACTTGTCTG  
GGGTGTGGCCTACGTTGGGCATCGTTATTAGCCGGCTGGGTCAATCCATGAAATGCGCACGCAGATTCCCT  
GTAAGTGTCTTTCATGTCTGTTACAATAATCTGCGTGGTGATGTTGCATTTGACGTTATCGGCAGCACCGAG  
GGTACTCAGTTGGTTGCGTGCGATATTATGGGCCACTGCCGATATCTTTTTTGGCATATGGTCGGAGTATG  
CCGGGTGAAGCTGGGCCCACGGCGGACGCAAAATTTTGAAGGGTGGCAACGCCAGACATGCGATCCACG  
GCGCCAAAAGCGACGATTGCTATTGGCCGCCCCGTTTCGCTCTTAAAGGGAATACGAGGAGAGTGGATCGC  
ATGCCCTTGGATATGCCCTTGGCCTTCATTTGGGCCGTTGACCCAAAAAAAAATGCAGCTGTGCAGATGAGCA  
GCAACGGTGCCCGCCTCGCAAAATGTATGCGTGTGCCGAAATTCGGCACCGATGGTGTGGCTGAAAAAAAA  
TGTCGAGGAGTTTCGATTTGTTTCAGCGGTTAACGGCGGGCGTGCCAGCTCGAAGTGAGCAAAAAAGTTGGA  
CATTGCATTTCTGCTTGACAGAGTAAAATTTTTTCCCTTCTGAAAAATTAAGCCGGCACATAATACCAATG  
GCTTAACAGACGAATAAAAGTTTTTGTTTTTTGTGTTCTTTGCCATGTAATAAATTTATATAAATCAAACCGC  
TCGAATCACAAAGAAAATATAATAAAAAAATTGAAAGAGACTTAAAAATTTAAGTTGCGACGAGAGACG  
AACCAAATAAGCCAAAAATTAACGGCTCCGGCACCAAGGAGACCGGCTCGCGCACCAAGAGAGGCCACG  
AAATATTCAAGGCCAGGATTCAGTGCAGCGGCGCAAACCAGCCATATCCGCGACGTCCGCCAGCAAGCGT  
CGGCGCAAACGTGAAGGCGACGAGACGAGCCACCAACGACCGGGCTCCAACAACGAAGAAGTCGGTCCA  
CAGGCGTAGACCCCGGTCCACATCCACCGTAGTGAGTCCGTTCCATTGTTCTGGCCCCATCCCTCGGTTTCG  
AGCCCCCTGGCATGAGTTCAGAAGAATTGACTCCTAATTGCACTCCCTGAAAAGGAGTAGATTTTTTTTTTAT  
CGTTAAATTTGGTTAATTTGTATTTATAAAATATATTCATACATACATAGGCACTTACGCCGAGCTTCACTT  
TAGAGTGCAGCGGTGAGGAAAACCTCCAACGGTGATGCATCTGCGCCTGTAAAATATAAAAAAAAAAAAA  
AAATCTAAAATTAAGTCTTGCGCGAACTATGCTCACATACTTACCTAATTTGAATTTACGCATTTATATCG  
CCCCCTTACCACCCCCCAGAGAGCTCTTTAGGTAGGGTAAGGTAGAATTAAGCGATTTAATACATACAATA  
CACAATACGTGACATACCCAGTTTTTAAGTAATTGTGCGGGCCATTGTTCTTAAATCGGGGCAACGATTGCC  
TCTAAAGTGCTCATTGCGCGTTTCTTTTGCGGCGACTAGCCAATATCCTTGTAAGTGTTCGTCGCCTGTT  
CGTTCAGTGTTGTAAAAAAAAAAAAAAAAAATTAATTCTATAAGATAAGAGAAAAATTTAGGAATTAATG  
CGCTGTGTCAATTAGTATAAGTATATGCAGCAGTAATACGCACCTGTGAAGTTAATGAATTATCCGCTTGC  
ATGAGATCCTAAACAGCTGCAAGATAAATGCCATAAGCAATGATTATGATTGTTATACATTTTAAGAAAA  
CGCAACCAATTATACGCACCTATTGAAAGAAATCATGTCCGGCTAAAATAATATTGCTGGGGAGAGTGGG  
CATTATGGCCGACACGGGCTAATATAGGCCATTTGGTGGCCAAAATGAGGGAGACGAGTGGAGGTGATC  
GTCTCATGGTAGGGCGGGTACGCTGGGTCCGGAACCGGGGCCGATCTGGAAGAGTAAGGTGGATAAAT  
AGTGTTTTTTTTTGTAAATTTATATTGAGTGTCTTACCTTTGTTGTTTACATTTTCATAGTTGTTACAGCTGT  
GGATTTTGTTCATGAGTTAGTAGTTCCGAATATTTGTTATCGATTATGCGGTTTCATTTTGAGTAGTGTGTG  
TGAGTCTATTTTGCTACAGACGTGTAGCTTTGTTGTTATCGATTGTGCGGACTGCGGGCCAGGGATGGGAC  
CACACCCAGAGAATCCGATGAGCCAGCCGGCGCGGCCACTGAGAAACAAGCAGTTCCCTAACA

>Ref\_dvir\_266

CACGACAGGCGACAAGAATAAAAAAAAAAAAAAAAAAGGTAGACAGAGTTAAGGTATGACGGAATACCACGA  
TATATAAGGAGCGACTACGATCTGCAAGCAGAATATATCATATAGAGCCGAGGAGCTAAGATGTTGGCTA  
CCCTCGGTCTTACCCACCCTGCCTGTAGCTGCATCTGCGATTGTTGCAACTACCCTTTTTGTATGCGATATT  
ATTTACCTAAGGTGCCCAAAAAGGAATTAAGATTTTATTTATCATATAATTGTATTCAAAGAAGATTTAA  
ACTCATGATCGTACTTCATTATACATTACGTGAGAAGAACACGTTTTTCTTTTTTTTTTTTTTATAAACT  
AAACTCAATCTGGGCAAAAACACACATGAATGAGATTACACTTCGAACTAATATGAAGTTAAATCACTG  
CTGATCTGAATGATCCACAAAAGTTATCTGTAATTACGAAGGCTGATTAGGAGTACACCCGCTGACTATA

ACCGCGATTCAAACAATACGTACAATTCGATATGTTGGCTTATTACCTTTTGTCTTTTCACACAGTACTCAC  
TACTTTAGTATGATCCAACGATGTCAGCAGGCCTGTTGACGACGATGATGTGCTGTGGACTCTTAATTTGA  
ACTGTGTAACGTAGAAATATAGTAGTCAGCGACATATACATGCTAAATCAGGATCGAAAGACAATGTCAG  
CGATATAAAACGGAAAGAATTGCAATTTAAATTTTCATGTGTACTTATGCCCTTCGCTTATACCTACGGCCA  
GTATGCCGTTTAAACAATTATATCAGATGTTGTAAATCCGAGTGAGGGTGCGCACTGGTTAGCTATCCACCA  
GATCTGCGCTCAAGAATGTCCGGGAATCAATGGGTGCGAACACGTGGTCACGTTGGTCTGCCTGTGCGTGC  
AGCAAGGAACTATTGGTTAGCGAGGTTCAAAGCTTATCTGCAGAAAATGAGACGATGCTGAAATCTTGGT  
TCGGCCTTAGGAAATTCGCTCCCTGCTACCAGTGTAGATTGCCGCTTTTTGGTGCTTTGGGCTTTGGCTTTG  
GCTCCGATAAGGACTACGCGTTATGCGTAATTTTTCTTTTTTGGCACGCAATAACGCAGCCCCGCGCTTTAG  
CCTGCACCTTCCTACGACTACCACACACAGGAAAGGCACCCACGACTCCAGTAACGATCCCTTAGTGAA  
GATTTATCAGTGTCCGAATTCTGAAAATTTTCCCTTTTCTTTCCGGGGACCGTGACCTTTTTTCCCTTCCCTT  
TTATTTATTTATTAATTTTTTTGTTTTTCCGAGCTTGAGTGCCGATACACGTGGGTTTATTACGCCCCACGTG  
AAAAATTGAATTTTATAATTTTTTAAAGCAATCTAAACCGACTGTACTCGTTGGCGATTAAAATGGAAAAG  
AATGACGCCACGCCAAAATAAAAGAGGCAATTAAGCATTACCCAAGACACGATATTTTCATTTCGCAAC  
GGCGTCATTAACATAGGTCATGGTCACTCTGGTTATGTTATTAACCTCCGCTGATCATATGTAATTGCATA  
AATGTTATGGTGCAGTGCTGCCTATTCAAGCTGATTGCGATCAGCTGATCATGCCAATGGCAATGTATGTT  
TATGTTTACAGAAATAAACTCATCACCCCATCACAACGCAGGTTTAATCGAAAGGATTAACTAATACTG  
AGATAAAAGCTGAAAAAGGGGATTACTTACATTCCCAAATGTCTTTAGCATGGTAATGACCAAGTTCTTTT  
CCCTTGAGGTCTTCTAACAAATATATACAATTACCAATTTTTTCGTTTGATACGTGCCTTAGTTCCAAGTGGT  
GCAAGTTTTGCGTTGAAATGCTTAGCCAAATTGCTTAAACGAAGTTGCGTTTTTATTACTATTTGACCGAC  
TTCAAAAGAACGAGGGCGTGTGCGTAAGTTATACGTTTCGCAAATTCCTTTTCATATGCCTTATCCATGTGTT  
TTTGAATATTAGAACGTATTAAGGGAAATTCGTCTGCTCGATCGAGTTTTAATTGCCCTTCATTTCAGCATG  
TTCAGGCTTTTGAGCAACTTGTAATCATTGCCGTGCTTAATCATATTTTGCCCAAACACAACGAAGTATGG  
AGAAATCCCAATAGATTGGTGTATGGTGTTCGTAACGAACATAATTTATACTGCTAATGTATACATCCCATA  
GGCTTTGGTTCGGACCGAATATATGTGCGCAAAGCAGCATTAAATCGAACGATTAACTCTTTCCACCGCGTTT  
GCCTGTGGCGAGTATACACCGGTACACATATGCTGTATGCCGTACTTCGACAAGAGTGAGGAGAATTCCA  
GGCTTTTAAATTGAGTGCCATTGTCACTCACTATTATCTCGGGTACTCCAAAACAGTCAAAAATATCTTCT  
TGCAGTATATCTACCACTACTTTGGCATTGAGCCTTTTTATGGGCTTGAGAAATGTGAACCTTTGAGTAGTG  
ATCCAGAATGACGAAAATACCAATGTTTCGTTTTTTTGATGGTGGGTACGGACCAACAAAGCGAAATACC  
TTTGAAAAGCCTTTTGCTCATCACCCCTTGGTTTCCCATGGGTGGTTTGAGGCATCGATTAGGAACTTTC  
GACGTTTGACAGAACTCGCAGTGGCGTATGTACTCGCGTACGTCAACCACCATGTTTCGGCCAGTACAAAT  
GTCTGCGAATACATTCCAAACATTTGGCCATCCCACAATGCGCGGATGTTGGTTGATCATGTGCTGCTTTC  
ATAACATTTAAGCGTAATTCAGATGGCACAATAAATTTCCAACCCTCCATGTTCTCATCTACACTACTAGC  
TGAGGGTTCATTTTCGGAAATATATATAAATCATCTACCACTCGAAAATCTGGCAAGTTGGAACGAATAAT  
ATTATTTTTTAGCCCGGCAGTATTCGTTGGATCGAAATGCCCTCCGAAGAACAAGTCGATTTCTCAGGGTA  
TACCTCTAGGTCCACCGCAGCTACTTCGTCTGCTGGCTCAAAGGCACGGGAAAGCGTGTCTGCGACCACA  
TTCTCACTACCCCTTGCGATGTTTCGATAGAAAAATTATATCCTTGCAATTTGAATGACCATCTAGCTAGTCT  
ACCACTTAGATCTTTTTGGTTCATTAGCCAACGTAAACTTGATGATCAGTCACGACTTTAAAATCGTGTCT  
CTTCGATGTACATGCGAAATTTTCTTACAGCCAATACAACGGCAAGACATTCGAGTTCGGTAACGGAATA  
ATTTTCGCTGCGCTTTATTTAGTTTTTTTCGACATGTATGCGATGGGTGCTCGATTCTGACTCATCACATTG  
GGCTAACAGACCGCCACGCCATGCATGGAAGCGTTCGATTGGACTATAAACGGCTTCTCATAGTTTGCG  
TTTATCAAGAACGGTGCTGAGGATTAATTTTCTTTTGATTTCTTCAAACGAAATTTGAGCATTATCATTCC  
AAAGCAAATGACGTGCCCTTTAGCAATTCTGTTAGGTGAAAGATAATCGACGAATACTGAGGGATAAACCC  
GTTGATACCAACCGGTCATTCTAGGAATCGTCTCAGCTGTCTTGTGAGGCACTGAATCTGCAACTGCTT  
GAACTTTAGCCGGATTAGGCTGCAAGGTGCCTTCACCTACGATGTAACCAAGATATTCGACTTTTGTTAGA  
CAAAAATTACTTTTACGGATATTAATGGTCAAACCTGCCCTACGCAATCGTGTTGCGATCTCAGCCAAATG  
AATTAAATGTTTCATCAAACTTTGCGATAGTACAAGTAAATCATCCAAATAAACCATACATGACCTTTCA  
TGTCGTAAGGAATTACTTGATCCATCAATCGGCTCATGGTCTGCGGTGCATTGCACAATCCGAATGGCATC  
CGCTTAAATTGATATAGCGGCCTGTTTCGGGATAGTGAATGCGGTTTTTGCCCCGCGATGATTCATCCAAGCA  
GATTTGCCAAAAGGCATCTTTTAAATCGATTTTTCGACACACAATGTACAGGAGGAAGTCTACTTATCAAGC  
CATCTAAATTTGGTATAGGATAAGCATCCTTACTGGTCACTTCATTTACCTTGCGGCAGTCTAAACAAAAT  
CTGACTTTTCCAGGCTTAACAATCAATATCGCGGGAGATGACCATGCGGAATATGGAGCTTCTTCAATGAC  
TCCAAGCTTGATCATCCTATCTACTTCTTCGCACAACAATTTTTCCCTTGCTGGTGATAACGGATAAAACCT  
CTGGTTTTATGGGCTTGGCGTCCCCAGTATCGATGATATGTTCTACAAGAGTAGTCTTTCCTAGACCATCA

ATTTCAAACGAAGGAAAGGAAGTGATTACTGATTGTAAGCGTTTCTTTTGGGCTAGTGTTAACGACAAC  
GATTCGACTCCACTTCTTCGAAATCCACTGAGTTCAATGTATTTCGAATGATGTACTGAAATGCCAAACGCT  
CTCCAGAAATCTATTCCACAGAGAACGTTTTCTTGATAGACGGGACAATTAAGAATTCGAAATTATTTGC  
AATGGAGTTATAAACGATAGGAATTGAAATGGAACCTACAACATGTTGTTTTGTCCGTCGGCGGTTCTCA  
CATCGCCTTTTATTTTGTTAAAGTCAATTTTCGAATCGAGAATTTTATTCGCTAAGCTCCCTCCAATCACGC  
TTTTCGTAGCCCCACTATCTAACAAGGCTAAGTAATGCTGATTGAATATTTCTAAATTCGTGAACGGTCGC  
ACATCGTTTGATCGATGATCAATCGCTGAAATACGATGCTTATTTAGCGAGCGTCGCTGAGTCCATAGGTT  
TCTTAGTCTCTCTGACGAACCGAGGCTTAAATTCAACTTTGGGTTCTGAAGCGAAAATAGTTGCTCTACGG  
TCTAAATATTCGTGTAAACGGACGTGGTAAGGTTTAAAGTTTTGTCTGACACGGTTTTGATAAGTCTGGTGT  
GAAGGTCGAATCAGGTGTTAAGGTATCTTTATTAAGTCTGGATCCGAGGCTATTGACGACGGACATTTCG  
CGTTTAAGAGACGACGAAAGTCCTCCGGAGAGTTTTCCGAAACAGGGTTACACTTTCTACAAGTGGGTTT  
GTAAGTGTCAACGGCACCACAGCCGTAACAAAATACACGACGCGTTTTAAACATTCTTGATATCTGTGTC  
CCTTTTCCTCGCAGTTCCAGCAAATCAATTTATCCGGAGAATGTATAGCATTTAAGTCCCCAGTTTCTACC  
AGATTCTGCGTAAGATCCGTCATTGTGGTATCTTCATGGACTACCTCGTTGACTACTCGTTGTGGTTTAATT  
GGTCGAGAAATTGGCTTGGAAGGTAATTCGAATAGAACGCTTCATGCTTGACATTCTTTGCGTAATGT  
CGAAGACTCGGAGTATTTACATGAAGTAGTTCGTGTCTCAATTCTGGTTTTAGGTTGCGCTTGACATTGA  
TCACTAACTCTGAGTCTGACATTGGTTCCCGTAACGCATCTGACAAGGCAAGAATCGTATCTAAAAATTCA  
TCAAAGCTTTCGGACCCTCGTTGTTTGGCTCTTCTAACCATGTCTTTTATGTCTTCGTCTGATCTGTGGTCTT  
TATATCTTTCTCGCAAGCATGTGCACAAATTGAACCAGCCTGTTTGGTCAGTCGTACGGTGATATCTCCAA  
AAAAATGTCAAAGCTGGTCCGGTAAACAGCAAATTGGCAAACCTGATATAACAACCTAAAATTGCCATTTA  
AACATTGTGAAGTCAAGCAATTTATGCGATATATAAAGTCGTCGACTGGGATATCACTAGCCACGCCTGA  
AAATCTGACATCCCAATTGGATATGACACTCGATATTTTGTGCGGGCCTATCGACTGCGTATTCACGTCTCG  
CATCAGACTGAACACTAGCATTTCGTAATCTCGAAGCGTTGTTTCGATCGCGGTGCATCACGTGGAAAATC  
ATTTTCCCATTTCTAATTGGGGTTCCTCACGTGGCTCCTGATACAAGTTTAAATTTCTAACTGCGGCATTTAA  
TTCTTCGGACAAATAGGACGCCATTTACAGCCTTATGGGCTTCCAATGTCTTACTGATAAGCAACTGCACAC  
GCTGTTCTGACAAACCAAGCGATTTCCTTAGAAGGTTGGGTGTTTCGCGATCCCGCTTGCTCCCGAGAGTTG  
GTCGGCCCACTAGGACGACCTCTGGCGGCTTTAGGAGTATTTTCGAGCATTACTTCGGGTAATAGTTTCGGGA  
CCGAGGAACGGCCCCCGTGTTTGTAGGGTCTTTGTGAAGCTACTGCATTCAAGTCACTGCTATCTTCGTA  
TAATTCTCGACTACAAACTCGTTTGCAAGTGGGACATGTCTCATTGCTTCTTAACCATTGATTTAGGCAATT  
TCGATGAAATTTATGAGCACATGGAGTTTCTACAGTGTCTGCATCACCAATCGATGATTCATTGCAGATAG  
TACACACTGCAGGTGCTTCGCTGAGAGTTAAATTTTCTGACTACGAACGACAGCCATCATCAATAAATCG  
ATTATAATTGGTCAAAGAGTTAAATGGGAATTGATCCCGAAAGGATTTTAAATTTTAAAGATATATACGAGA  
AGCGCTAATGAGCGATAATTATGAAAATCGGAAACGGTTTTAAGGCAGAAAGAAAAGGTTTTAAGGCACT  
TCGATGTTAATACAACAATATTATAACATTTTATAACATGGGACTTATCCTTAGGTAAATACATCGCATAA  
TCTAAATCTCTATGTTTGATATATCTTCTTACGAAAAGCAAGCAAACCTATTTTACTAAATCAGTGTTGAGTT  
GTCTGAACATAAGTTGAAGAGGGACGAGTCGAAATAACCCAACCAGAACAAATTCTCAATTCAACTAGAACA  
AACGGAATGTTATTATGCCCTACCAACCTTCTATCACTTGGTAGAGAACCGACTCGAAATCAGATCTAAA  
AGTCCTAAATGAATCAAAAGTGGCGAAAACATAATAAGATTTCTAGTGGAACAGTATAACTGATCCACTA  
AATAAATCGCTCGACTATTTACTTCTTGGTCTGGCTCCAACAAAAGACATCAGAATACCAGCAGTTCCAA  
GAGAGGATAAATGTCCGTCACGGAAACTAAAATTATTTGGATGGTATATTGTGATAAGGATAGGAAGAAG  
GGTGAAAGCTAGCATGGATTTAACGTAGGATCGTCCACATTGGCTCGTGACAAATCATGTAACGAACAAT  
GCTATCGGCTCTCTCCTAAGTTCTTGTGGGCCAATTCCGGATCTCGGGGGTGAGAAGCGGAAGAGCAGAA  
GCTCGGGCCCCACGTTGGGCGCCATTTTTCTTATTATTTATCATGTAACGAACACGACGGCTACGCTGGG  
CGCGTCTTGCTAACACTCGTGTTGTGCATTGGGAGCGTACTCCGTCTACGGGTTCGACCGTGCTCAGGG  
AAGTGGCGTGGGTTCTTTTGCTCCCTAACACACTCGACGCGTCAAGTATAATAAAGAAAAAAAAAAGGTAG  
ACAGAGTTAAGGTATGACGGAATACCACGATATATAAGGAGCGACTACGATCTGCAAGCAGAATATATC  
ATATAAGAGCCGAGGAGCTAAGATGGTGGCTACCCTCGGTCTTCACCCACCCTGCCTGTAGCTGCATCTGC  
GATTGTCGTTGCAACTACCCTTTTGTATGCGATATTATTTACCTAAGGTGCCCAAAAAGGGAATTAAGATT  
TCATTTTATCATATAAGTGTATTCAAAGAAGATTTAAACTCATGATCGTACTTCATTATACATTACGTGAG  
AAGAACAACGTTTTTCTATTTTTTTTTTTTTTTTTTATAAACTAACTCAATCTGGGCAAAAACACACATGAA  
TGAGATTACACTTCGAACTAATATGAAGTTAAATCACTGCTGATCTGAATGATCCACAAAAGTTATTTGT  
AATTACGAAGGCTGATTAGGAGTACACCCGCTGACTATAACCGCGATTCAAACAATACGTAACAATTCGA  
TATGTTGGCTTATTATCTTTTGTCTTTTACACAGTACTCACTACTTTAGTATGATCCAACGATGTCAGCAG  
GCCTGTTGACGACGATGATGTGCTGTGGGCTCTTAATTTGAACATATGTAACGTAGAAATATAGTAGTCAGC

GACATATACATGCTAAATCAGGATCGAAAGACAATGTCAGCGATATAAAACGGAAAGAATTGCAATTTA  
AATTTTCATGTGTACTTATGCCCTTCGCTTATACCTACGGCCAGTATGCCGTTTAAACAATTATATCAGATGTT  
GTAAATCCGAGTGAGGGTGCGCACTGGTTAGCTATCCACCAGATCTGCGCTCAAGAATGTCCGGGAATCA  
ATGGGTTCGAACACGTGGTCACGTTGGTCTGCCTGTGCGTGCAGCACGAACTATTGGTTAGCGAGGTTCAA  
AGCTTATCTGCAGAAAATGAGACGATGCTGAAATCCTTGGTCCGCCCTTAGGAAATCGCTCCCTGCTACCA  
GTGTAGATTGTCGCTTTTTTGGTGCTTTGGGGCCTTGGCTTTGGCTCCGATAAGGACTACGCGTTATGCGTA  
ATTTTTCTTTTTTGGCACGCAATAACGCAGCCCCGCGCTTTAGCCTGCACCTTCCTACGACTACCACACACA  
GGAAAGGCACCCACGACTCCAGTAACGATCCTTTAGTGAATATTTGTGAGTGTCCGAATTCTGAAAATTT  
TCTTTATTCCGGTGAAATGTTATAGCCAAGCTCTTGGGAGCGCATGATGTCTATATTACCCCTTTTCTTTCT  
GGGGACCTTGGACCTTTTTTTCCTTCCCTTTTATTTAATTTTTTTTTTTTTTTTTTTGAGCTTGAGTGCCGATACA  
CGTGGGTTTATTACGCCACGTGAAAAATTGAATTTTATAATTTTTTAAAGCAATCTAAACCGACTGTACTC  
GTTGGCGATTAAATGGAAAAGAATGACGCCTCGCCAAAATAAAAGAAGCAATTTAGCATTACCCAA  
GACACGATATTTTCATTTCGCAACGGCGTCATTAACATAGGTCATGGTCACTCTGGTTATGTTATTAACCTC  
CGCTGATCATATGTAATTGCATAAATGTTATGGTGCAGTGCTGCCTATTCAAGCTGATTGCGATCAGCTGA  
TCATGCCAATGGCAATGTATGTTTATGTTTACAGAAATAAAACTCATCACCCCATCACAAAGGTTAAAAG  
GGTTACTTACATTAAATGTCTTTAGCATGGTATGACCAAGTTCTTTTCCCTTGAGGTCTTCTAACAATATA  
TACAATTACCAATTTTTTCGTTTGATACGTGCCTTAGTTCCAAGTGGTGCAAGTTTTGCGTTGAAATGCTTAG  
CCAAATTGCTTAAACGAAGTTGCGTTTTATTACTATTTGACCGACTTCAAAGAACGAGGGCGTGTGCGT  
AAGTTATACGTTTCGCAAATTTCTTTTCATATGCCTTATCCATGTGTTTTTGAATATTAGAACGTATTAAGGGA  
AATTCGTCTGCTCGATCGAGTTTTAATTGCCCTTCATTTCAGCATGTTTCAGGCTTTTGAGCAACTTGTAATCA  
TTGCCGTGCTTAATCATATTTTGCCCAAACACAACGAAGTATGGAGAAATCCCAATAGATTGGTGTATGGT  
GTTTCGTAACGAAGTATTTATACTGCTAATGTATACATCCCATAGGCTTTGGTCCGACCGAATATATGTGC  
GCAAAGCAGCATTAATCGAACGATTAAGTCTTTCCACCGCGTTTGCCTGTGGCGAGTATACACCGGTACAC  
ATATGCTGTATGCCGTACTTCGACAAGAGTGAGGAGAATTCCAGGCTTTTAAATTGAGTGCCATTGTCACT  
CACTATTATCTCGGGTACTCCAAAACAGTCAAAAATATCTTCTTGAGTATATCTACCACTACTTTGGCAT  
TGAGCCTTTTTATGGGCTTGAGAAATGTGAAGTTTGAAGTAGTGATCCAGAATGACGAATATACCAATGTTT  
CGTTTTTTTGATGGTGGGTACGGACCAACAAAGTCGACATATAACCTTTGGAAAGGCCTTTTCGCTGACCAC  
TTGGTTTCCCATGGTTGGTTTGAGGCATCGATTAGGAAGTTTCGACGTTTGACAGAACTCGCAGTGGCGCT  
CGCGTACGT

>9\_rnd-1\_family-127\_\_LTR\_\_Gypsy

ATATAAGTTAACAATAAGCATAAATATATTGCCCTAGCAATTAAGTAGCTTCGTATTAACAATGCTGACG  
CGCCAGAACTGAGTTCAGCGCTCTGCGCTAAGAACGGCCAGCAGCGGTAAGCTGACACTGCATGGAATGC  
TGAGTCGGCTTGCCGACCATGCTTTGATGGCGTGATGCATTGAGGCTTAGGGTATTTGTATAATTTGCTTG  
TCCCCTAGTTTTTAGTTTTATATGAAGCGCGCAACACATAAGTCGCCGAAATAAATATACTGCTCCGGCAT  
TGCCGATAAAACATATCTTTCGTAATATTACTGGATCAAGGAGAACATATTTTGATCAAGGGCAGCGCGG  
GATCAACGCAACTTACCCAAGATAACATTGTGTTACATCGCAGAACATACATTAATGAATAACTGGCGCC  
CAACCAATAAATAGGAACCCATACCATGTAAGTTCATAAGTGATTTTCAGTTTGAAGAAATTATTCACGAA  
CGCCACGTACCGATACGTGTGATTTTTTAAAAAAAAAAAAAAAAAATTGTAAAGTAAAGTAAATATTGCTGCT  
CTCTTCTGCCAGCATTTTCATTCCTTTAAATCATTGCATACTTTCACTAAAACTGTTGCATACTTTTACCAG  
CGTTCCTTGTCATAAAGCATTGCATACCTTAAACGAATAATTATTGCATACTTTTCGGCAGCATTACATTTT  
TGCTGCATACCCCTAACAATTTTTATAATAAATATTGCATACCCCAAGATTCACCAGTTTCCACTATTGCC  
AACAGCGTTACCTGCCGATCTTCTCGATCGGCCTAAGTTTGAAAAGTGCCAACCATAAGCCAATGAGTTG  
GAATTATAGGGAGATAAAAGTCGAATATAATAGTGACGATAGCTGGGAGGGGAAATCAATTGCTCAGTA  
GATCCTACTCCTGCAGATACCGTTGTAAGTGAAGAAATGGAGCCGGCTCAAGTTCAGAATCTCATTGAGG  
GTGCCATCAGGCAAGCTTTAGCGCAACAACAAAATCAGTTTCAAGCACAAATAACCGCTTTAGCTTCACA  
AGTACAGAGTTTGCAGGTGGAGGCGCCGCAAAATCGTACATACGAGAAAATATCCGTCGATCCNAACGCC  
AAATGCGATATTCCCTTGGACATTATTAATCTGTGCCGGATTTCTCCGGCGTACAGGATGAGTATGTAGC  
GTGGAGGCAAGCAGCCATCTACGCGTACGAACTATTCAAGAACTATCCAAAGAGCACTGCACACTACCAA  
GCGGTAGCGATCATTAGGAACAAAATCAAAGGCCAGCTGGAGCCTTACTAGTGTCTCACAACACTGTCC  
TAAATTTTCGATGCAATACTAGCTAGGCTAGATTGCACATACTCGGACAAAACATCCTTGCGCTTGCTGAGA  
CAATGTTTGGAGTTAGTTACGCAGGGCGAAATGTCCCTGATGCAATACTACGATGACGTGAGAAAGAAAC  
TCACGCTCGTAACTAACAAAATTGTAATGTCTCACGACCAAGAAGGCGCGGATTTGCTCAACCGGGAGGT  
CAGAGACGACGCCTTGACGCGCTTTATCTCCGGTCTTAGGAAGCCGTTGAGAGCGGTTGTGTTCCCTGCAC  
AACCAAAAGATCTACCATCCGCTCTGGCCCTTGCCAGAGAGGCAGAAGCTAGCATTGAGAGAAGCATGTT

CGCGAACTCTTACGCTAAAGCCTTGCAAGACCGAGCGCAAATTGCTGAAAGTAACAAAACCGTGCCCAAG  
GCAAGCAAACCAGATTTAACAAAGATGAGCAAAATCAGGAGAGAAATCCCCATTTTGTGAAACGCCAAA  
AGGGCGGTCCCCAGCCCCAGGCCCTAAAGATAATCAAACCTGAGGCTCCACAGCCCATGGAAGTTGACTC  
TTCCTCCAGATTTAGACAAAAACCGACTACAGCAAGCGTCAGGCTAATGAGTCCAACGCACCAAAACGCA  
AGAATTCGTCAGACCGTTCAACAGGTCAAAGACGACAACGCGTTAACAATGTCGTACAATCAGATTCCAA  
AGAAGCCGTAAACAGAATTCGAGAAGGCGGCCAAAGAGGCAGTTGAAGAACTAGAGAGTGAGAACGAGT  
ACGCACCTGGTGACGACTCGATTAATTTTTAGGGAACACTCCCGGCTTCCGTACATTGAACGACGGTTGGC  
TGGGAGAACTCTGAAGATGTTGATTGACACTGGCGCGGCCAAAAATTATGTGAAGCCCTTAACAGAGCTAA  
AGACCATAACGCCGGTCGCCAAGTCATTCTCGGTAAACTCGATCCACGGGTCTACCGAAATCAAGCGCAA  
ATGCTTGATGAACATTTTCCAACATACCTCCCCGTTTTTCTCCTCGATACCCTAAGTTCTTTTCGACGCCATC  
ATAGGCTTCGACTTGCTAACACAAGCCGGAGTCAAATTGAACTTGGCAAAAACACTCTGGAATACCAGAG  
TACATCCGAAAAACTCCAGTACTATCAATGTGCTGATGTGAACCTTACCCGATGTCAACGACATCGTAGTCC  
CCCTTCCGTAAAGAAAGAGTTCAGGGACATGATACTCAGAAACAAAAGAGCCTTCTCAAATGCAGACGA  
AGTCTCTCCCTTTTAATACTGCTGTTATCGCTACAATCCGAACAGTAGACAACGAGCCTGTGTATTCAAGAT  
ACCCGAGTCTCATGGGTGTTTCTGACTTCATAAACAAAAGAAGTCAAACAATTACTGGACGATGGCATAAT  
CAGGCCCTCCAGATCGCCTTACAACAGCCCAACATGGGTGGTTGATAAAAAGGCACTGACTCATACGGTA  
ACCCAAAAAAGGTTGGTAATCGACTTCAGGAAACTGAACGAAAAAACCATACCGGACCGCTACCCCATG  
CCGAGCATCCCCATGATCTTAGCAAATCTAGGAAAGGCGAAATACTTCACTACCCTCGACCTAAAGTCGG  
GGTACCATCAAATTTACCTTGCGGAGCATGACCGCGAAAAGACTTCATTTTCAGTAAGCAGCGGCAAGTA  
CGAGTTCTGTGCGCTACCATTGCGCCTGCGCAATGCAAGCAGCATATTCCAAAGGGCAATAGACGATATC  
CTGAGGGAACATATAGGAAAGATTTGCTTTGTCTATGTAGACGACGTCATAATTTTTCTAAAAACGAAAC  
GGAGCACCTTCAACACATTAACATTGTGTTAAAATGTCTAATCGACGCAAACATGCGTGTAGGCCCGGAA  
AAGACTCGTTTCTTCAAGGAAAGTATCGAATTCCTGGGTTTCATTGTAACCAAAGACGGAGCAACATCCG  
ACCCCAAAAAGTTAAAGCCATTTCAGGAATTCCTGAACCAAAGAATGTCTACAGCGTTAGGTCCTTCTTG  
GGGTTAGCCAACTACTATAGGGTCTTTATTAAGGACTTTGCCGCTATAGCGCGTCCGATATCGGACATACT  
TAAAGGGGAAAATGGTTCAGTTAGTAGGCACGTATCAAAGAAAATCCCTGTTGAATTTAATGAAGTTCAA  
CGCGATGCATTTACCGTCTGCGGAGTATTTTGGCATCAGAAGACGTCATGTTAATGTATCCAGACTTCCA  
GAAACCGTTTCGATTTAACCACTGATGCTTCGGCCAGTGGAATTGGCGCGGTTCTTTCCCAAGGCAATAGGC  
CAATAACAATGATTTCTCGCGCCTTAAACAGGCCGAACAAAACCTATGCCACTAACGAAAGAGAATTGCT  
GGCCATTGTGTGGGCTTTAGGCAGATTGCAGAACTTTCTGTACGGTTCTAGGGGAAATTAACATTTTCACGG  
ACCACCAGCCGCTCACGTTTCGTGTGTGCGGACAAGAACACGAATTCCAAGATTAAAAGATGGAAATCTTA  
CATTGACCAGCACAAATGCCAAAATGTTTTATAAACCGGGCAAAGAGAATCTGGTGGCGGATGCCCTTTCA  
AGGCAAAACATTAATGCTCTGCAAGATGGGCCCCGTTTCGGACGCTGCAACCGTTCACAGCGAACTTTCCC  
TGACCTACACGGTCGAGACAACAGACAAACCTTTGAATTGCTTTAGGAACCAGATTGTCCTAGAGGAATC  
GCGTTTTCCGCTAAAGCGAAACTTGTTGCTGTTTCGCAGCAAAACACGCCACTTGATCAGTTACACTGACA  
AGAGCNCAATTCTCAAAACCTCAAAGAAGTTGTGAATTCTGGAGTCGTTAATGCAATACATTGCGATCTT  
CCCACGTTGGCAAGTTTCCAACACGACCTGATTTTGTATTTCCCTGCTACCCAAATTTCTGGCATTGCAAAAA  
TCTTGTGCAAGATATAACGGACAAAAACGAGCAGTTAGAAATCATCACTGCCGAGCACAAATCGAGCGCAC  
AGAGCAGCTCAGGAAAACATTAACAAGTACTTCGGGACTATTATTTTCCCAATATGGCCAGTCTGGCCA  
AAGAAGTGGTTGCAAACTGCAGGGTCTGCACTAAAGCCAAATACGATAGGCACCCGAAGAAACAAGAAC  
TCGGGGAAACGCCTATACCAAGTTATACTGGCGAAATGTTGCATATTGACATTTTCTCGACAGACAAGAA  
ACAGTTCTTGACCTGCATAGACAAATTCTCAAAATTTGCAGTCGTCCAACCGATATTATCCAGAACGATAA  
TCGATGTCACAAGCCCTCTACTGCAAATTGTTAACCTTTTTCCCGCAACCAAGACAATTTATTGCGATAAC  
GAGGCGGCCTTCAATTCCGAGACCATCACTTCGATGTTTCGAAACGCCTACGGCATTGTGATTGTGAATGCG  
GCTCCGCTTCACAGCACCTCAAACGGCCAGGTGGAGCGCTTTCATAGCACCTGACCGAAATTGCGAGAT  
GCCTCAAGTTAGACAAGAAAATCAGCGACACTACAGAATTAATCTTAAAGGCTACGATAGAGTACAACA  
AAAGTTTGCACTCAGTAACCCTCGAGAAACCAATTGAGGTCGTTTCATGCAGCAGCTTCTGATCGTCGCGG  
GAACGTCAAAAACAGGCTAATTAAGGCACAGCAAGACAATATCAAAAGGTGCAATGCATCCAGGCAAAA  
CCGCGTTTTTCGAGGTAGGAGAAAAGGTGTTCCAGAAGAACAACAAGAGGCTAGGGAACAAGTTAACTCC  
CTTATGCTCAGAACAAAAGGTGCAAGCAGACCTGGGAACGTCTGTCTCATTAAAGGGGAGGGTGGTCCAT  
AAGGACAACCTGAAATAAGTTTTCTCCACAATTAGCTAGTAAGCCAACCTCAGAGTTTAAACACCGTCTT  
ATATTGTTTCGTCCATTTTCAGGTTTGCACCTCACTTTGCTTGTGGCACTAGCAGCGGTAATGCTCGGATCAC  
CGACTTCTCGCATGCCAACTACATTCCGGTCTTAGACGGGGAAGTACTGGTGTTCGATCAACGTAGCTACT  
TGAGGCACTCAAGTAACATTTCCGAATTTGTTAGTATGATAGACGAGACGGAAAGACTGTCCGATTCCTTT

CCACAGTCGCATATGCGCAAACACTACTAGACGTAGATACAGATCACCTTAGAACATTGTTGTCCGTTCTTCA  
AGTGCATCACAGATTTGCACGAAGCCTCGATTTCTTAGGCACTGCCTTGAAGGTTGTTGCTGGCACCCCTG  
ATGCTTCAGATTTCTTAAGGATCCGCGTTACAGAGACGCAGTTGGTGGAGGCTAACTCCAAACAGATACT  
AATAAACTCCGAAACTCAAAAACAAATAAACAGACTAACGGACACTATCAATAAAATTATCAGTTCCCGC  
AAAGGCGATTTGGTTGACACTCCTCATTTATTCGAGACCCTGTTGGCAAGAAATAGAATACTGAACACAG  
AAATTCAAAATTTAGTACTCACCATAACGTTGGCAAAAGCAAGCATAGTAAATCCTACAATCCTTGATCA  
TACCGATCTAAAATCACTTATCGAACAAGATACCCCAATAGTTAGCTTAATAGAAGCTTCTAAGATCAAG  
GTCCTTCAGTCCGAGAATATTATCCACATATTAATAGCCTACCCTAAAGTTGAGTTTAGGTGCCAAAAGGT  
CTCCGTCTACCCCGTTTCACACCAACAAACCATTCTGCGACTCGACGAAGACACGTTGGCGGAATGCGAA  
AAGGATACCTTTGCAGTTACTGGATGCACCGTAACTACGACCTACGCCTAAAAACCATTAAACAGCTATAA  
AATAACCGGGAACGGTCAAAAAGCTTGAGAGAGGAGTAGTCAACACATAAGAATTGCACTTCATATTTATG  
TCATATAGAACACACTTTTGTTTATAAGAACGCAAGAATGTTGCAGTGCACCTTTGCTTTACTGCGACATTC  
TGCTGAGCTACGAGTTCAGTGCCCGGCCACTGCGGCCAGCAGCGGTAACCTGACACTTGCCCTATGCCGCA  
AGCGACAGTGTTGGAGTATGCCCAATCGGCTTGCCGGATATAGTAGCTAAGACTTTATGCGCCTAGCCTTA  
GGGTTTCAGATCTAATTCAATGTTTTAATTCTAGTTTGGTTTGTAACCAACTTTGTAGGAACAACCTTCTTCAA  
ATATACTGCTCCGGCACTTGCCGTTATCAGTCCGTTATACTAGTTGTTTCATTGCTGAGCCACAAGGCCAG  
TGATTTTTTGAAGGCTAGTTGCTTTCCGAACATAATCTACAAGTAAACTTTACCAATCTCAGCACTTGTTGA  
CGAGGGTCTGAATATACAACATCAACATCTACAATTGAAAAATCAAATAACTTACAAGGTGTGAGCTATA  
TTATTCAGGTAAAAAGCTTATATGCTACTGGATACTAATTTATAAAAAGTTGCTGCGCACGCACCACCGAAT  
TTCGCAGCTGCTATTAGGTACCAACGACGGAAGACAGACAACCTGTTTCATCAGTCAATTCTGGCCATATTG  
GGTGTATGAATACGTGCGTGATCTTGCGCGGTACATGAAGTGATTTGTCAAACGAACACCTCCATCGTCCT  
GTAAGCAAACGTGATCATTATCAAGCAAACCATCCTGGAAAAAGGCAAGGAGACAATACGAACAGTCGT  
CGGGATAGCTATCGAGATCCTTCAATGACCTGTGACCAAAGTCGGTGTGCTAGGCGCTGAACATATTAGA  
GGTAAACAAGCTCCAGAAGAGAATGCGGAAACTGCAGGTGCTTGTTACCAAGGCCTCAACATTAAATGA  
AAAATATTGTGATCTTTTCTAAATAGTACCTAGATGATATTGGTCAAATCTTTATAGTAGTTCTGGATAAC  
AGACCCACTATCGAGACAATACGTTAACTAAATCTACACATGTTTTCTGGACTTGCCTAATCAGAGGCAAC  
TCACGCCGCTCCTGGTTGGTTACGAGCCACTGCCATAAAGTCGAACAACCTTGTTCATTAGCGAGCACTA  
GGTNCAATAGACTGTATTGACTCCCTTTTATTAATATAATAAATGTAGGTATAGATTTATTTACTTATTATT  
TTTAAATTTTCGAAAGCAGGTTTCGTTGCTTTGTATGCGGTGGTAAAGTCCATGACCGACATAATGCAAACAA  
TTCAAACAGAAAACATTTTCATTCCGCGTTCTTTATTCTAAATTCAATTGCAACCTATCCGCAATTATATTAA  
TCTAGCAACATATTCCTGCGTAATATATAGTATATACAGCAATATATTTGTATATTGTTTGTAAGACCATTT  
AAGAGTCAACACTGTTATTTTACGGGGTTAACCTTTGTGTTACTTAAACATATTTTTTTATTTAACGATTTTC  
ATGTTCCAAGATTATTGGAGATTGGAGCCGCTTGCCCTCCGTCAGGCTACGCATATATTGAGCTTGCAATA  
TCTTCCATATCTACAAATGGTGTGTGCATTTCTGCAGCAATAAACCGTTTACTCGCTGCTATGTCTAAGCGT  
GGTGCTACTTTTCGAACTGTTTCGTTTACTTTTCGCGTGCTAACATCTCTCGAATTGCTCGACCCAAATCGTGT  
AAAATATAGTGCTAGGGGAAAATTATCAGTCATTAAATAATTTTTTTAATAAACAATTTAATTTTAAATTTTT  
TTGTATTTTGATTTGCTAGCTCGAGGGCCAGGGTTTAGTTTATTGAAAACCTGAAAAGTTAAAAAAAATTGG  
CTTTATTCGATTGCTTATCGGCAACCGTCTTCAGGGCACTAACACCAAGAAACAATAAACAATAACATT  
AAAATAAATTAATTTAAGCAATAAATTAACATTTAACATACGTCTGCGCTTCTTGACTTGGAGATTGAAA  
TTCTTTGGCTATTTAATAAGTCTCAACACAAGCGAGCGCAATTTTATGTGTATTTGTTTAAAGTTTACTCTTT  
AGTTTGTGTGTAGCTATTTTATTGTATGCTGTATGTTGAAGTGTTGCAGGATTATTGTTGTTTCCTTGTCAT  
ACAGTCGGTCATTGGTGCTAATTTTATACCCTGAACCCATTAAAATGCGTAAAACAAGTATAATGTATTTA  
TGTAATATATGAAACAGGCAGAAGGTAGAAGCACCGATCCCATAAAGTACATACATATNNTCTTGATCA  
GCATCAACAGCCGAATCAATCCAGCCATGTCCGTCCGTCTGTCTGTCTAACC GCCCACCCGTCTATCCGAA  
CGTATGAACGCGAGGATATCAGAACTATAGCAGTTAGAGACAGATTTTCCGATATTCGATAACTTGGTC  
CGTTTCCAAGTAATCGATAAGAATCGACATCAAAATCCTTTTTTTTTTACCAATTTTGGTAAATAATAAGAG  
CTAGAGTAAAATAATTGATATATTGCTTTTAGACTAGTATATATATATATATATATATATATATATATATA  
TATATATATCAAGGTCCTCTCAGTTAATACCTATTGCCACCTTTCCGCTACCACCGCAGAGCTATAAATCA  
AGTTAATAACCACACTTATATTGCCCATGAATTTGAGCCACATTTTAAATGCAATTTTCTTTTTTGAGTTCAA  
TAAGATGTTCTGATGGTTCAATAAGATGTACTGTAGAACATTTTATTTAGATTGGTTAAGAAAATCCCAT  
AGTTATGTGTCTTACTGCGCAGTTGGATGGGGTCAAATTCCAAGAATTTCTGTATACATGTACACACACAC  
ACATTCATGCGCATCTGCTGCGAAATCTGTCAACAGCATTGCGATTGCGATTGTTTCTTGTGCTGATATTT  
AATTCAATAAGACACAATTATTGGTGTGACTGTTGAGTAGAGGTGGTGGCGTCTGTGCGGAATTCGAGAA  
TTCTTAATCTGAAGTCCGATTTGTGTGCGATTGTCATTGTTTTTAGTTTACACTCTATTGAAATTATTGTTGG



TGACCCCGCAACAATGTATTTTGTAAATTACATTACTTCTATGTATTGTAGTTGTTGCGCTATTGAGCTTTT  
TCAATAGCTTTTCACAAATAGAAAGATTGAACTATTTATTTTTTGTGTTCAAAATTGTTTTATATTTCTTAAA  
GTTACGAGAAGCAGGCAGACCCGAATTGGTCTGTGCTTATTATTTAAGAACAATAGTTTGTATATAGGCA  
AGCGAACCCGAATAAGAACGTGCCAATTTTAGCGAAGAGACAATTATTAGTTATAATTTTGAGTAATGCA  
AGTGGCCGATGCGTACCAAATGCATGAAGCGAACGAACCTTAATCTAACNCGATGCGCAGCATCGAGGCCT  
TCGCATAAGTAAAGCTAGGGGCAATAAAACGATCGTTACAGCGAAGAGCGGCAGCTCTATGTAAATGAATT  
CTTAAGAGCGAAATTTAGGCCCTTGCTTTGCAGAGCGAGTATTATAAGATAAAAATTAAGATGCTGCTCTTA  
TCAGTTGCGAAGT

>Ref\_NewTE8

TGTAATGGTGGGGAGGTTTCGGGTTTCAGTTTTTTTTGCCTTTTCGTTTGGCCATCTACCAAAAAATAAAAAACAAA  
CGGCCGTGGCTGTTGCCTAACCGGGTGCATAGGGATTGGAGGTTTCGCACTTCTTGCTAATACTCGGACAAT  
AGCTCGTCGGACTGGTCGGGGTTTTTTCCTTTCCCTTTTGCACCTACCATAAACACATAGTTTAAGTGCGAT  
CAAAAAAATAAAAAAAACTTATTGATTTAAGTAAATCCATTGAAACAAAAAACCAGGATTCTAGT  
ATGGGTACCATTAATGTGTTCCGACCGAACACCCAAATTCAACTATTCAATTTCCGCGTAAGTGAGAGAA  
CTAAGGTGTTGATCGCCTCTCTTTCTCTTTACCTCCCTACCTTGACAAGCAAAAAAATGGAATGTGG  
ATGCTTGTCCCTATTTTCAGGTTCTTAAACCATCACTATAAATTGCAAGCGGCTAACATGGGTACTTGACAG  
ATAAAACAATTAATTATGGAATTAGGATATCATATCATATAAGCTAATATAATTCGTTTATTCACGCATTG  
TTCAATTTTGTGTTGCCAATTAATAGCAAGGTGAGTATAACTCTATTTACAAGAAAAAATATACAGTTTCCAA  
ACAAAATTTGAATCCAAAGTTAATATGATGAATGTGCAATAACTAGTTTAAATCCCATAAAGAAATTAAG  
GGGAAGGAGAAATTCACCAACATTATCTTGAGACTTGACGGATAGTAATTAATTTACCGTCTTGCTAAATT  
AACTGCATTTAAATGTTTCATGTGTGTATATAACTACATATATCTATAGGCATTGGTTTAACTCTTACTCAC  
GCGATATCCTTCGAAGCAGACGTTGGGCCCAATGTATACGACGATTATGATCGCTGTTGCTAAATATTACA  
AAAGAAATTTATAAGTATATAAACACATGTATATATATATATATATATATATATATATATATATATATATGAGCAACGG  
TCAAGGTGCGTGGTGTAGGAATTTCTCTCGCTTTAACTTATTTAGGCATATTCATTGCACATTTTGTTTTA  
AAGAAATTAGTAAAAGAAAAAATAAAGGAAATAAAAATTAAACTAAGGATCTATTAGCCGTCC  
ATCTTGGCAACGTTAACAATTAATGGAATTATATGGCAATGCTGCTAAGCAAGCGAAAGGGGTACACCA  
AAAGTAATACAGACTCGGCTCCTTTGTTACTCTCTGCAGGTTACACTATATGCTTAGTGATGCGGTCCCG  
ATGGTGCTGCATAAATAGTAAGCGTTTACCCGCTTGACGCGGTTTTCCGAGGCTATGCCAGATGTTGTTT  
TTCGCAAGACAGCGGCTGATAAGTAAATAGCAACAAAATTGGTTCTGCTGGGTTGCTAAGTGCGACACG  
TGCTCTTGGTGTGTCCTTGTCTGGTCCGATCTCCCCCTCTGGTAGTGCCGACTAGTACGTCTAAATCTAGT  
CAACTGAGCAGGCACGGAACTGTGGAAGCCTAATTAGTTCCAAGTCTCAACACTAGCACATATAAATAC  
CTTTTCTTTTAAGGGTCACCCCGAATCACAATTAGGTTAGTGGGTGCGAGTTGTTATGAAGGTTTTTGGTTTC  
TATTAGCGTACCAAAAGAACACTTCCAACTGTACCACAATTGCAGCCTTGGTTCGTTGATGTCTTTGCAAA  
AATTATTTGCAAAGAAAGAAAAAATGTTATGAACTTAACCTCGCACGCGCTTCAAATATATCTGACATGCT  
GAGCTGTACTTTTAACCTTTACTACTTCCCAACGACAAAAAATAAGGAAGCTTTCAAAGCTCTACATC  
ACGCGATTATATTTTAAAACGGTACTATGGCCTGATCTTATCACCTTTTTCTCTATTTCGCCCTATTCCG  
TTGCGCATGCCCTCAGCTGTGCAATAAACGAAGAATTGGCTTCCAGCGCGGTCGGTAAAGCAGTAACTAA  
ACTAGAGCAGCTGATCAACAAGCAGATTTCGTTTGGGGAGTGCAAAGCAGCCACTACACCACAGTTTATGC  
AGCGCTACTTGCTAGCGGGACATAAACTGAAATAACTATAATAACTGTTGGGTAGAACTTGTACTAGTT  
TGTATATCTTTGAGATGAAAAGTACCGATGCATTTACCTGTTTCATTAGCTAGTTGATAGTAGGCTGGGCT  
GACTTTTTGTACAACAATCGCCGGAATGAAAACCTGGTGCAAGCTTAGAACTAACTTCTTTTGC GCGTTAC  
TCTGACAAAAATTGCGGGCGAAGACTTTCGTACCGGCAGTAAGACTTATGTTTCCGGCTGCGCAAATTATAT  
ATCTTAGCATTTCTATTATGTGACTGAGCTACATTGTCTTTAGCTATCTGACGGATTACTTGTAAGGCTGTG  
GGCCTCTCAATAGCAGTGTCTTCGGACAAGAGGTTAAGTCGCTTTAGCAAGTCATAGTCTTTACCGTTTAA  
CATCATATTCTGTCCAAACGCTAAAAAATATGGAGAGTACCCTGTACTTTGGTGAACGCTGGCTCTCAAGG  
CAGCACAAATGGCGTACAGCTTTTTATCCCAATTTGAATGATCTTTTCCGATATAGGCTCTAATAGCCGCT  
AATACTGATCTATTTACTCGCTCACTCGCATTACTTTGTGGCGAGTATATTGCCGTTTCGAATGTGGATGATT  
CCATACCGGGTAAGAAAAGCTTTAAAGACACTAGAAATGAACTGAGAGCCATTGTCGGTCAGAATAGTTT  
CTGGCACGCCGAAAGTGCAAAACAGTGCGTTTTCTAGATAGTCGATAATTTTGTGTTGGTAGTAAACGCGCG  
AAGAGGCCACATAAAATGAAATTTAGTATTGTGGTCTACAACCATCAGGAGACCTATATTGCCGTTCTTG  
GACCGAGGATATGGCCCTAGAAGATCCATGTAGAGCTTCTGAAATGGCCGTTCTGACGTCATAGGCTTGC  
CCATTGGAGGTCTCAACACTACATTGGGGCTTTTCGTTTGCCGACAACTTACAATTGACTATATATTCA  
TGAATTTGGGCCGACATTTTGGCCAAAACAAGTATCTCTTGAGTTTCTCTATTGTTTTCCGATGCCACTG  
TGTGCAGCGTTAGGGGGATTGTGGGCTCTCTCTATCACTTGTATGGTGAGAGACGAAGGTATCCAGAGTTT

CCAGGATTGTTTCTCCTGAATGCTATATCCCGTCGCTGGCTCAGTACGTTTATATATAAAACCGTCGATTAT  
CTGTAAATCCGGTAATCTGGATTGGTTAGAAGAAATACTGTCTATCAGATCCAGATAGTTTGGCGATTGGA  
ATTCGGGTGAAGACAGGTCAACTATGGGACCTTGCTCCTCGAATTCGCAAGCTCTGTCTCATTTTGACGC  
GATAGCGCATCAGCGACAACATTTTGTGTACCGCTACGATGCGAGACTTTAACTTGAAGCCCTGTAATTT  
GATCACCCATCTACCTTGACGTCTCTGAGATCCTTCTGTCTCATGAGCCATTGTAAGGAAGCATGATCAG  
TTATTACTTCGAAGTCCTGTCCTTCTATATACGCTCTAAATTTAAAAAATACCTCTTATTACGGCTAAGCATT  
CCAGATCGGTCACACTATAATTCCGTTGGGCCTTTGACAGTTTCTCTGACATGTATGCTATTGGAGCCTCCT  
CTTCCTGTTTCAATTTAGTTGAGCTAGAACGCATCCTAAACCAGTTGTGCTAGCATCGCAAACCTAATCTAAAA  
GGTTTTGAGAAGTCGGGTGTAGCCAATACAGGTGCAGAAGTTAAAAGTGTTTTTAAGGTGTTGAAAGCGG  
AATCAGCATCAGTGTTCCATTTCAATACTTTGATTTCTTTAGCAACTCTGTAAGCGGAAAGCTAACTGTT  
GCATAATGATTAACGAAACGTCTATACCATCCAGCGAGTCCAAGAAAACGTCTCAGTTGTTTTACACTTTT  
TGGTACAGGGAATTCGTTAATAGCTTGTATTTTGCTAGGGTCCGCTCTTAGTTGACCATAACCAATTATAA  
AGCCCAAATATTTAATTTCCCGCATACAAAATTTTGATTTTGCGATGTTGATTGTCAAGTTCGCTTTACGCA  
AGTGCAGCGCTACTTCCTGCAAAAGCAACATATGCGAATCGAAGTCCTCTGATAGCAGAAGTAAATCATC  
TAAGTAGACAAATACGCGGGTCCGCAAATGGGCTGGTATCACGCGTTCCATTAGTCTACAAAGCGTTTGA  
GGAGCGTTACACAATCCAAACGGCATTACTTTGTATTGAAATAATGGACGATTAGGGACTGTAAAAGCGG  
TATACTGACGTGATTTTTCTTCTAGGGGTATCTGCCAGAATGCGTGCTTCATATCGAGGCCCGTTATATATT  
TAGCCGGCGGCAGACGACTAAGAATTCCGTCGATATGGGGTAGAGGGTACGCATCTTTACGAGTGTACTT  
ATTTATGACTCGAGAATCTAGACACAGCCTGTTTTTATCCTTTCTTTGCACAAGGACGCAGTTGCTGCTCC  
AGGGGCTATGCGATACCTCTATTATATCTAAAGCTAGCATTTTCTCGATCTCGTCAAACATTAGCTTTTCA  
ACGGCTGGCGAAATAGGCCAATGTCTTTGTTTGACGGGGGTCACATTATCTATTTCAATGCGATGTTTCGAT  
TAACTCAGTGCGTCCTAATCCTTCCTTTTCATAAGAATAGAAATTAGAAATGATCGAATTTAATCGTGACT  
TTTCTTCAGCGGTTAGCTGATGCATTTTCGCTGTTTCCTGGATATCCTGTTTCGTTACTGTTGTCTAATTCATT  
TACGGACTCATCAGGACGAATTAATTCGTTAACAGTCCAAAGTCCTGCCAAAAATTTATGCCTAAGTAA  
ACATCTTGTTTCAAATCGGGTATAACATAAAAAATCAACATTATGCACTTGTTTTCGAAATTCAACTTTAAG  
TGTCAGTTTGCCTACCACTGGGCAAATAGCGTTGTTAGCTGTTTCGGATTGATCCAGAGCATTTCGCGCGCTT  
TGGGATGTGACAACAGTGACTTAGCTGCAACATTACCGAGGCAACTAATCGTCGCTCCGGAATCTAATAA  
TGCTACATATTTTTCTCCCTCTAGGCTTAACTCAGTGTACAAGCGGTTATCTGAGCTCATAAACACTGATTG  
AACGAGCTTCTTACGAAGACTTTTAATATTTTTCCAGAATTTCCCTAAGTCGAACAGTAGAGCGTTTTGGCC  
GACTGAGAAATTCGATGGGTTCTATGCTGCTAAAAATTCGTCTTCGTGTGTCAAGATAGTGTTTTACTCTA  
ATATGGTACGGTACGTACTTATTTTCAATATCAGTTTGAGTTGCAGTCTCGGCGACTGAACATGTATTTGC  
CATATAAGTTGTAAATATAGTATTTGGAGTTGATTGCTCCAAACTACCATATGACTGTATTTCTGGCAAGG  
ACTTTATTCTTTTGTGGGATGCGTCAAACCTGGTGTGGTCTGCGCATCCCGCTTCCGGTTTCCCAAAGATT  
GCATTTGCTACAATTGGGTTTAAAAGTATTTTTAGCACCGCAACCGTAGCAGAATATACGCCTTTCTCCCA  
TGCAGTCATCGAATCGGTGTCCCACTTTATCGCAATTCCAGCACACTATTTTCTTGTTCTGTATTTCTGAAA  
TATTATCTTCTATATCATTATTTTCCAGTAACTCAGAGACATTACCTCTACCGTATTTGGTTTCGATTGGGAA  
ACGAGCCAGTTTCTCTACAGAACTTTCATGTTTCTTAACTTCCTCTCTAATTCTGCTCGAGTTCTAATCT  
TCAAATGCAATAGTTCGTACCTGAGCGCTGTTCTCGCATTGCGTTTTAATAGGTCAACAAGCTTGTCTTCG  
CTTATTTTCGTTAGATAATTGGCTAACCAGGCCTTCAATCGCTGATTGAAAATCATCAAATGTCTCCTGATC  
TTTCTGGCGTCTTTTCCCTAATTAGTTCCCACAAGTCAAAGTCGTCTTTAACGTCCTCGAATCTAAGTCGGAA  
ATCCGTACAGAAAGCCAACCAGGTATACTGTGGGTTTTTCTTGTGGAAGCTCCAAAACCAATCATTGGCTT  
TCCCGAAGAAAAGTAAATGAAGATTGTCACAAAGCAGCCTATAGTCGCCGTTCAAATTTTGAGCCGTTAA  
TGAACGAATTCGATACAAGAATTCATCTATCTGCATAGAGTCTTTCGAACCGTCAAATTTAAGTCGCCAGG  
TTTGCATAATGCTAGCTGCTTTTTCTGAACTCAAACCTTGAGTTTGATCGATTGCTACCTCTGGGGCTGTATG  
GTCCGCAGTCAAGGGGTATGTCAGAGTTCTGGGCACTATTAGGGAGAGTATCAGCACCTAATCCCCTTGG  
AGACTGAACTAATCTAGAGCGTGTTGATTCAGCTTGCTCACTTCGTACATTTAATGTTGCTAACTTCTCTTG  
CAGTGATTGTTCAACAGAAGCTTTAATAACGTTTTTGGAGTTCTGCTATTAAAGTCCTTTGCTGAGATTGTA  
GAGCTTCGTTGATATAGGTAATTGTCTCTACATTTGGACCATTGTCCACTGACTTATTTCCGTTGCTGCCTA  
AAGACATGCAACTACCTAAATATTCTCTATGATTTTCGATTCATAGACCTAGTTTGCATACTTCGCTTGGGC  
GTGGCTCCTCGCCCTTTTCCGAATCGCTGACCTCTCCTGATACCTGTAGTAGTCGAACCATCTTGGAAGG  
TAGAGTATTTTCGCGATAGAGTTTCGTCTGTTTCAGCATTACCAGCTGAGTGTAACCTCCGCTGCCAGTGTAT  
TGTTTCATAAATATTAGTTGCCCTGGGTTGCAATCTGCCTCACATACTGGACATTTTGGGGTTGTCTTTAGTG  
TATTGCTTATGCAAACGTTCGTGAAAACGGTGTTGACAAGGAGTAGTCGCAGATAGCTGTTCTGCTTGCAAT  
TGCTCATGGCAAATGCCACAAAATGGATCTTGCGCGTTAATCGCTGCAACTATGCTCTCTGTGCTTCGTCT

CACTGCCATAATGAATGCAAACCTTTTGCTTGTTTCCAAACAACAAAAGGAAACTAAATAGGACTTGTAT  
TATTAAGTCTTGGTTATTTATTCTATCTGTCTTTTTCCACACGTTATTGCTTACAATCCTTAAGCAAACCTG  
AGTAGTTGAATTTGTGCTATTTATTTTACTGGAGTCTATTTCTGATTTGGATTTTTACTGCTCATGGACTAC  
TAGACAACATCCGAAATATTTCCAGTTTGTTGTAATTCCAAATAGTCCTTGAAACAATTAACCCAAATTTG  
ATTATTATTCCTCTTTTCCGATCTTACCCGCTGCTTAAAGTACTAGTAATTAATTGTGGTTCGACTAATCCA  
GCAATGCCTGAATTACAATCGCAAATTCCTACAATACTACTGTCTGAACACAACGTATTTTCCCGAGAA  
AGGGGCCTAACAGGGTAATTAATAAATAATAGGTAGTAATTGATATGGTATAACTTCGAGTTTCGATTGG  
GGATTGTTGTGCACTAGGTGTTAGTCGTGCTTACGCAAGAAGTAAAAGTTTTACGTTCTTGCTAGGGCCCC  
ACGTTGGGCGCCATATATGTAATGGTGGGGAGGTTTCGGGTTTCAGTTTTTGCTTTTCGTTTGGCCATCTACC  
AAAAATAAAAAACAAACGGCCGTGGCTGTTGCCTAACCGGGTGCATAGGGATTGGAGGTTTCGCACTTCTTG  
CTAATACTCGGACAATAGCTCGTCGGACTGGTCGGGGTTTTTTCCTTTCCCTTTTGCACTTACCATAAACAC  
ATAGTTTAAGTGCGATCAAAAAAAAAATAAAAAAAAAAATTTATTGATTTAAGTAAATCCATTGAAACAAAAAA  
AAACCGGATTCTAGTATGGGCACCATTAATGTGTTCCGACCGAACACCCAAATTCAAACCTATTCAATTTTCG  
CGTAAGTGAGAGAACTAAGGTGTTGATCGTCTCTCTTTCTCTTTACCCCTCCCTACCTTGACAAGCAAAAAA  
AATGGAATGTGGATGCTTGTCCCTATTTTCAGGTTCTTAAACCATCACTATAGATTGCAAGCGGCTAACATG  
GGTACTTGACAGATAAAACAATTAATTATGGAATTAGGATATCATATCATATAAGCTAATATAATTCGTTT  
ATTCACGCATTGTTCAATTTTGTGTTGCCAATTAATAGCAAGGTGAGTATAACTCTATTTACAAGAAAAAATA  
TACAGTTTCCAAACAAAATTTGAATCCAAAGTTAATATGATGAATGTGCAATAACTAGTTTAAATCCCATA  
AAGAAATTAAGGGGAAGGAGAAATTCACCAACATTATCTTGAGACTTGACGGATAGTAATTAATTTACCG  
TCTTGCTAAATTAAGTGCATTTAAATGTTTCATGTGTGTATATAATTACATATATCTATAGGCATTGGTTTAA  
ACTCTTACTCACGCGATATCCTTCGAAGCAGACGTTGGGCCCCAATGTATACGACGATTATGATCGCTGTTG  
CTAAATATTACAAAAGAAATTTATAAGTATATAAACACATGTATATATATATATATATATATATATATATA  
TATGAGCAACGGTCAAGGTTCGGTGGTGTAGGAATTTCTCTCGCTTTAACTTATTTAGGCATATTCATTGC  
ACATTTTTGTTTTAAAGAAATTAGTAAAAGAAAAAAATTAAGGAAATAAAAAATTAATACTAAGGATC  
TATTAGCCGTCCATCTTGGCAACGTTAAACAATTAATGGAATTATATGGCAATGCTGCTAAGCAAGCGAA  
AGGGGTACACCAAAAGTAATACAGACTCGGCTCCTTTGTTACTCTCTGCAGGTTACACTATATGCTTAGTG  
CATGCGGTCCCGATGGTGTGCTGCATAAATAGTAAGCGTTTCACCCGCTTGACGCCGTTTTCCGAGGCTATGC  
CAGATGTTGTTCTTCGCAAGACAGCGGCTGATAAGTAAAATAGCAACAAAATTTGGTTCTGCTGGGTTGCT  
AAGTGCGACACGTGCTCTTGGTGTGCCCCTTGTCTGGTCCGATCTCCCCCTCTGGTAGTGCCGACTAGTAC  
GTCTAAATCTAGTCAACTGAGCAGGCACGGAACTTTTCTTTAAGGGTCACCCCGAATCACAATTAGGTTA  
GTGGGTTCGAGTTGTTATGAAGGTTTTTGGTTTTCTATTAGCGTACCAAAAGAACACTTCCAACTGTACCAC  
AATTGCAGCCTTGGTTCGTTGATGTCTTTGCAAAAATTAATTTGCAAAGAAAGAAAAAATGTTATGAACTTAA  
CTCGCACGCGCTTCAAATATATCTGACATGCTGAGCTGTACTTTTAACTTTACTACTTCCCAACGACAAA  
AAAAATAAGGAAGCTTTCAAAGCTCTACATCACGCGATTATATTTTAAACGGTACTATGGCCTGATCTT  
ATCACCTTTTTCTCTCTATTCGCCCTATTCGGTTGCGCATGCCCTCAGCTGTGCAATAAACGAAGAATTGG  
CTTCCAGCGCGGTTCGGTAAAGCAGTAACTAACTAGAGCAGCTGATCAACAAGCAGATTTCGTTTGGGGAG  
TGCAAAGCAGCCACTACAA

>160\_rnd-1\_family-89\_\_LTR\_\_Pao

TGTCTGGTTACGCAGCCAAAACAACCTGGAGCGACCTCGCAACTGATAAGAGCAGCATCTTAATTTTATCTT  
ATAATACTCGCTCTGCAAAGCAAGTGCCTAAATTTTCGCTCTTAAGAATTCATTTACATAGAGCTGCCGCTC  
TTCGCTGTAACGATCGTTTTATTGCCCTAGCTTTACTTATGCGAAGGCCTCGATGCTGCGCATCGAGTTAGT  
TAAGTTCGTTTCGCTTCATGCATTTGGTACGCATCGGCCACTTGCATTACTCAAATTAATACTAATAATTGT  
CTCTTCGCTAAAATTGGCACGTACTAATTCGGGTTTCGCTTGCCTATATACAACTATTGTTCTTAAATAATA  
AGCACAGACCAATTCGGGTCTGCCTGCTTCTCGTAACTTTAAGAAATATAAAACAATTTTGAACACAAAA  
AATAAATAGTTAATTATTTCTATTTGTGAAAGCTATTGAAAAAGCTCAATAGCGCAACATTTGGTGACCCC  
GACGTGATTTTTATTTTTGTTGTTGTAAGATTATTTGCTTTACATTAAAGCAATAATCTTAAAGGGCACCAC  
CTGGCATTTCGTTTTGTGCACTTTATATACATACATACTTATCGCCGTCGCTTTGCCTACTCTCTCGGTTCGC  
TTAAAGTCTCTGCTCATTTCGTGCGGTACTTATGTAAAAGCTATTGCCGTTGCTTCATTACATAGCTTGACAC  
TTGCGTTTCGCCGAAGTTCTTATTGTACAATACTATTGTTTTTTGAACGGTTTGCATGTACTAGCGATCACCGTT  
GTTAGTTACTCAGCTAGTTTTCGCACGCGCTTTCTATCGCGCTTCTAATGGCAACCGAAAATAATGCCTCTA  
GTGCAGTGCCCTCTGCAAACAGGGTGACCTTTCTGAAGCGCAAAGCCATTTCAATTTATGACAGTTTGCAA  
ACACTTCGAAATGCTCTAACTAATTCGCCACTTAGTGCAATTGATGAGTGCGGTCTTAGTGTTAGGCTGAA  
GCAAATCGAGCGGCTTCAGACCTCATTGTGATATTACTCACACTAGCCTCGAAGAACTAGACTTTGATGAA  
ATCGGTAACCAATTGCGTGAGGACTTCGACGAGTTAGCAGTTTCTATGGAAATTTTCGGTTTCGGAGTGAAA

TTGCGAAACGTGTCTCAATATTGCCCTGCTCAACATTTTCGCGACCAATCTGTGCTGCCCTCGCAGACAGTT  
AGAGCTAAGGCACCGCCAACACTACCCTCAATAAAAGTTGCCTACGTTTCAGTGGTGGTTACACAGAATGGG  
CCGACTTTTATTCTATGTTTACAACCGTCATAGAAAATCATCCTGATCTAGCAGATATCGAAAAGCTGCAG  
CATCTTCGATCGTGCCTGAAGGATACAGCGCTGGACGCGATTTCGATCATTGGAAATAACAAACGATAATT  
ATGCCATAGCACTTAATTTATTGGAGAAAAGGTTTAATAATAGACGTTTGGTTTTTTCAGGCACACATACTT  
GAGATATTGGGGCTCAAGAGGGTGGCAGGTGGATCGGCCGTGTCTGCTAAGGGAGTTATCCGACCAATTCA  
ACGCACATTTTCGCGCGTTAAAGAGCATGGGCAACTCCGAACAAATCGCTGGATGCATCATTGTGCAGAT  
TATTTTACAAAAGCTGGACCCAATATCACAAGCCAAATGGGAAGAAAGGCTAGAGGATTCTGTCGTTTCGTT  
AATTTAATACCATCGTGGGAGCATATGGCTACGTTTCTGGAGCAGAGATGCCGAACAATGGAAACCGTAA  
ATTTTGCTATGGCAAGCTATGCCCCTAGCCATCAGGTGGGAAAAACTAGAGCAATTAACACCAGTAGATC  
GTCATTTATCGCCACTAACCACGACGCCCCTGTCTGCGTCTTTTGTGACAGCCCTGGTCATAGTATATATA  
ATTGTTCTCGATTTGGAAATTTGACCCCTGCATTACGGCTTAGGGAGGGCAAAACGAGTTGCATTGTGCTTG  
AATTGCCTAAAGAAAGGTCATCAATTGCGATCATGCAGCTCTGGATGCTGTCTGGACCTGCGGGGCGAAAC  
ATCATTCTCTGCTGCATTTAAACAATTCCGTATCTCCGTCTGGTCAGCTGACTGAGCCTGCAAATTCATCGC  
CGATAGCCCATGCCTCTTTTCGCTAAGTCATCGCCATCTACCTCCACATCTCTTGTGCCCAGTATTTTCAGTA  
GTGATGTTGTCTGCTTTGGCTACGGCTATGATCTTTGTAAGAAATCGCTCCGGCACTTTGATACCTTGTCTGTG  
CCCTTTTGGATTCTGGTTCTCAGCTTCACCTTATAACGTCGCGCCTTGCTCAACAGCTTCAGCTAAAGAAG  
CACAAGTCCTCAGCCATTGTCTCTGGTCTAGGAGATTCTCGTTTTGAAACAGAAGGAAACACGGTCACTAT  
CACAATACAGTCTCAAGTCTCTGAATACTCAACATGCCTTACAGCTCTGGTAGCGCCTAACATAACTGATA  
GTCAACCGAGTTTTACTATCAACACGACGAATTGGAACATTCCCGATAACATAAACTTGCAGATCCGTCT  
TTCTTTAAACCTCAACGCGTGGACTTGCTACTTGGAGCTAGCCTGTTTTACGACCTTCTCAGCGTCGGCCA  
GATAAGGCTTCTCCCAGGACTACCGTGTCTTCAAAAAACACGGCTTGGTTGGGTAGTTTTCTGGAGGCGGA  
CCCCGCTTGAGTGGTTCTATGTTAATGGCAAAGCATACTGCGGGCAAACCTTGAGTCAAGTTCTGAAGAAC  
GTGCTGATGAATTGGTTCGAAGATTTTGGGAGATAGAATCCTGCTTGGAAAGTACACCTACCACTTCAAA  
GGAAGAAAACATCTGTGAAGAACATTTCTGTAAAGACTCATATCAGATTGCCTAGTGGCCAATATTCAGTT  
CGTTTACCCTTCAAGCGAAGTTTGGAAATGTCTGGGGACGTCATACCAACAAGCCTTTCGTCTGGTTCTGAC  
CCTGGAACGCAAACCTACAAAATCGTCCAGATCTGAAGATTCAATATTCAAACCTTCTAAAGGAATATTTG  
GATCTTGGTCATATGTCGCCTGTTGCTCCAGAGTCTATAGGACTTTGTCAATACTTTCTTCTCATCACTGT  
GTCTTTAAAGAAGACAGTTCAACGACAAAATTGCGAGTCGTTTTTCGACGGCTCAGCAGCTACCTCGTCAG  
GTTATTCATTAAATGAACTATTGATGGCTGGACCTGTTATTCAAAGCTCGCTGTTTCATATCCTTCTTCGCT  
TTCGTAATTTCCCGATCGCCCTAACAGGAGATATTGGAAAAATGTATCGCTGCGTACGCGTTTCAGCACCG  
GATGATTTTCTCCAATGCATTCTGTGGCGAGACTCGCCAGAACAGGATATAAAGATTTTAAAGCTGGATAC  
AGTTACATACGGAACAAAGCCAGCTTCATTCCCTCTCTATCCGTGCTATGCATCAGCTGTCTATGGATGAGG  
AAACTAATTTTCCAATTGGATCTCGGATTTTTCGCGCGTGACTTCTACGTTGATGACCTCATTTTCAGGGGGT  
GATTCAATTCAAGAAGCAAAGGAACCTTCTTAATCAGACGGCTGGAATCTTGGCAAGTGGGGGGCTTCAAGT  
TGCGAAAGTGGTGCTCAAACAATTCTGCTGTACTGAAAGGGATAACCCGTAGAGGACAGAGAATCTTCCCT  
AAAGTTTGATGATGGTAGCGACATCACCAAAACTCTTGGACTCGCTTGGGACTCAGCGTCGGATCGATTG  
TTGTTTTTCGTTTTTCGTCCATTCAGCAGAGATCTAAACCATCNAAAAGGTCAATACTATCGACCATAGCTCG  
CTTGTATGACCCGCTTGGACTCATAGGGCCGGTAATTGCCAAGGCTAAAATCTTTATGCAGCAGATCTGGA  
AGGAGAAGCTTGAGTGGGACGAGAGCTTGCCATCATCACTGGCAACAGCTTGGCATGATCTTTGCTGCAG  
TTTTGAGAAGGCACAGTTTCTTAAATTTCCCTCGTCTCGTGTCAATACCTGCAGCAAGAGTTAGAAGTTCAC  
GGTTTCTGCGACGCCAGCATCGAAGCATATGGGGCCTGTGTCTACGTCCTTCTCGACGAACATCAGCCAG  
TTGTCAGCTGTTGTGTTCCAAATCGCGTGTAGTCTCTGAAAACAATCACAGTTCCAAAGCTAGAGCTCT  
GTGGTGCCGTCTTATTATCTAATCTCATGCGTGAGATATCTAAAATGAATCTGTTTCGATGGAAAATTCTAC  
TGTTGGTCGGATTCTTCTGTATGCCTTTCCTGGATAAGGACCGAGCCCTGCAAGCTCAATGTGTTTGTGGC  
TAATCGCGTCACAGCAGTTCAAGAGCTAACTAATGGCATGGAATGGCGTTACGTGCCTACTTCACTCAAC  
CCGGCAGATATACTCTCGAGAGGATCTACGCCAGTGAATTAGATCAATCGTCACTGTGGTTCAACGGCC  
CAGAATTTCTAGTTAAAAACGAATTGGACTGGCCTGCTTCTTGTGTCAGAAAGGACAGAACTCGAACTT  
AAAAAAAGGGTCCTTATTGCGTCATCTCCCTTCGTTGATATAACTGTCGCTTGTAAATACGTCAACTCATT  
TGATACAATGCAGCGTATATTTCGGATATATTTATAAATTCGTACACAGAAGCAGGCGTCCTGGACTAACA  
GTGTCTGATATACAACATGGGACCCAACCTTACTAAGGCTCGTCCAGAGAGCACACCTGTGGGAAGAGA  
TCAAATCATTGCAATCGAGAAGAGTTGTTAAACCGTCCAGTTGTATCGCATCACTTAACCTTTTTTGGAT  
GATTTTCGGAATTCTTAGAGTTGATGGGCGCTTGAAAACTCTTCGCTGGATTTCGACGCTCGCCATCCAAT  
AATTCTCCCGTGTCAACCACCCCGTCACAACTCGGTCATCGCACGGTTTCACAATCGGGACTTACACGCTG

GTCCACGGGCACTTCTTGCTCATATTCGGTTGCAGTATTGGCCGATTGGTGGAAGGAAGACCGTATCCAAG  
GTGGTTGGAAAATGCGTGAGATGCTTTCGTGCCAAGCCTCGATTAATAGAGCATATAATGGGTGATCTGC  
CCGAAGAACGTTTGACTGCTTGTCGAGCCTTTGAAGTCTCTGGTGTGACTATTGTGGACCATTTTTCTATA  
AGCCAGACGTACGAAATAAAGCTCCAGTCAAATGTTACATGGCTGTCTTCGTNTGCTTCGCGACTAAAGC  
GGTTCACCTGGAAGTGGTCAAGGATCTGTGACAGCTTCTTTCTTGAATGCGCTTAAGAGGTTTATATCGA  
CTCGAGGCAGGCCATCTCAGATATGGTCGGATAACGCTACCAACTTCGTGCGGCCAAAAACGAGCTTCC  
GGATCTCAAGCGTCTATTCACGAGTCGTAATCATATCGAGTCAGTGCATAATTTTTGTCATGGCTGATTCCA  
TTGATTGGAAATTTATACCTCCTCGTTCACCGCATTTTGGCGGCCTTTGGGAAGCAGCAGTGAAGACAGCG  
AAACATCATTTTTATCGTGCTGTTGGATCTTGCCTTCTCGACTTCGAAGAGTTTCGCACCCTAGTCTGCCAC  
ATAGCGTCGATAATTAATTCCAGGCCATTGTTTCCTCTTTCAGAAGATCCAGCAGATCTAGACGTGCTCAC  
TCCAGCTCATTTCTTGATTGGTGGACCCAGCTCATCGTTCCTTGAACCTGATGTGACGCACCTTCAATTCAA  
TCGTCTGGATGGTTGGCAACGCGTAACGTACCTCCAACAACCTGTTTTGGTCTCGCTGGCGCGAAGAATACT  
TAACGCTGCTTCAGCAGCGCTCCAAATGGCGTACTCCGAAACCAGGCCTATGCGTCAACGACGTAGTCCT  
CGTAAAGGATGAAAATCTGCCGCCTCTAAGGTGGCCACTGGCGAGAATCACAGAGCTAATCGCGGGAAA  
GGATGGAGTCGCTCGAGTAGCCGTTTTGCGCACCGCGACAGGAGAAACGAGNAGAGCTGCAAACAAGCT  
ATGCCTATTGCCCATCAGGGAATCTGTTGAAAGCCCATGCCTTCCAACGGGGGGAGAATGTCTGGTTACG  
CAGCCAAAACAACCTGGAGCGACCTCGCAACTGATAAGAGCAGCATCTTAATTTTATCTTATAATACTCGCT  
CTGCAAAGCAAGTGCCTAAATTTCTGCTCTTAAGAATTCATTTACATAGAGCTGCCGCTCTTCGCTGTAACG  
ATCGTTTTATTGCCCTAGCTTTACTTATGCGAAGGCCTCGATGCTGCGCATCGAGTTTAGTTAAGTCAGTTC  
GCTTCATGCATTTGGTACGCATCGGCCACTTGCATTACTCAAATTATAACTAATAATTGTCTCTTCGCTAA  
AATTGGCACGTAATAATTCGGGTTTCGCTTGCCTATATATAAACTATTGTTCTTAAATAATAAGCACAGACC  
AATTCGGGTCTGCCTGCTTCTCGTAACTTTAAGAAATATAAAACAATTTTGAACACAAAAAATAAATAGTT  
AATTATTTCTATTTGTGAAAGCTATTGAAAAAGCTCAATAGCGCAACAGTCATAAACATACACTTTGAACA  
ATTTAGATGCAATTGATTGGTTCGAACACCAAAGTTGCATAGCGTTCAAATCGTCTTGTAGACGAGAATGA  
TGTAGGGAATTAGTGTATGATAGAAAAAGTTTGACATTGTCCGCATACATGAGTACACGGGCATGTGATA  
TAACAGAGGGGAGATCATTTATAAAAAGAGTAAAGAGTAAAGGTCCAAGAAGATTAGAGTTAGAGTTAG  
AAGCTCACGGTTTCTGCGACGCCAGCATCGAAGCATATGGGGCCTCTGTCNACGTCCTTTCTCGACGAACA  
TCAGCCAGTTGTGAGCTGTTGTGTTCCAAATCGCGTGTAGCTCCTCTGAAAAACAATCACAGTTCCAAAGCT  
AGAGCTCTGTGGTGGCGTCTTATTATCTAATCTCATGCGTCAGATATCTAAAATGAATCTGTTTGATGGAA  
AATTCTACTGTTGGTTCGGATTCTTCTGTATGCCTTTCCTGGATAAGGACCGACCCTGCAAGCTCAATGTGTT  
TGTGGCTAATCGCGTCACAGCAGTTCAAGAGCTAACTCATGGCATGGAATGGCGTTACGTGCCTACTTCAC  
TCAACCCGGCAGATATACTCTCGAGAGGATCTACGCCAGTGAATTAGATCAATCGGCACTGTGGTTCAA  
CGGNCCAGAATTTCTAGNTAAAAACAATTTGGANTGGCCTGCTTCTTGCTTGTGAGAAAGGACAGAAGTCA  
GAACTTAAGAAAAGGGTCCTTATTGCGTCATCTCCCTTCGTTGATATAACTGTCACCTTGTAATAACGTCAA  
CTCATTTGATACAATGCAGCGTATATTTCGGATATATTTATAAATTCATACACAGAAGCAGGCATCCTGGAC  
TAACAGTGTCTGATATACAACATGGGACCCAACCTTACTAAGGCTCGTCCAGAGAGCACACCTGTGGGA  
AGAGATCAAATCATTGCAATCGAGAAGAGTTGTTAAACCGTCCAGTTGTATCGCATCACTTNACCCTTTTT  
TGGATGATTTTCGGAATTCCTTAGAGTTGATGGGCGCTTGAAAACTCTTCGCTGGATTTTCGACGCTCGCCAN  
CCAATAATTCTCCCGTGTCAACACCCCATCACAACTCGGTTCATCACACGGTTTCACAATCGGGACTTACA  
CGCTGGTCCACGGGCACTTCTTGCTCATATTCGGTTGCAGTATTGGCCGATTGGTGGAAGGAAGACCGTAT  
CCAAGGTGGTTGGAAAATGTGTGAGATGCTTTCGTGCCAAGCCTCGATTAATAGAGCATATAATGGGTGA  
TCTGCCCAAAGAACGTTTGACTGCTTGTGCGAGCCTTTGAAGTCTCTGGTGTGACTATTGTGGACCATTCCT  
CTATAAGCCAGACGTACGAAATAAAGCTCCAGTCAAATGTTACATGGCTGTCTTCGTCTGCTTCGCGACTA  
AAGCGGTTACCTGGAAGTGGTCNAGGATCTGTGACAGCTTCTTTCTTGAATGCGCTTAAGAGGTTTATA  
TCGACTCGAGGCAGGCCATCTCAGATATGGTCGGATAACGCTACCAACTTTGTGCGGCCAAAAACGAGC  
TTCTGGATCTCAAGCGTCTATTTACAAGTCGTAATCATATTGAGTCAGTGCATAATTTTTGTCATGGCTGATT  
CCATTGATTGGAAATTTATACCTCCTCGTTCACCGCATTTTGGCGGCCTTTGGGAAGCAGCAGTGAAGACA  
GCGAAACATCATTTTTATCGTGCTGTTGGATCTTGTGTTCTCAACTTCGAAGAGTTTCGCACCCTAGTCTGC  
CACATAGCATCGATAATTAATTCCAGGCCATTGTTTCCTCTTTCAGAAGATCCAGCAGATCTAGATGTGCT  
CACTCCAGCTCATTTCTTGATTGGTGGACCCAGCTCATCGTTCCTTGAACCTGATGTGACGCACCTTCAATT  
CAATCGTCTGGATGGTTGGCAACGCGTAACGTACCTCCAACAACCTGTTTTGGTCTCGCTGGCGTGAAGAAT  
ACTTAACGCTGCTTCAGCAGCGCTCCAAATGGCGTACTCCGAAACCAGGCCTATGCGTCAACGACATAGT  
CCTCGTAAAGGATGAAAATCTGCCGCCTCTAAGGTGGCCACTGGCGAGAATCACAGAGTTAATCGTGGGA  
AAGGATGGAGTCGCTCGAGTAGCCATTTNGCGCACCGCAACAGGAGAAGAGCTGCAAACAAGCTATGCC

TATTGCCCATCAGGGAATCTGTTGAAAGCCCATGCCTTCCAACGGGGGGGAGAATGTCTGGTTACGCAGCC  
AAAACAACCTGGAGCGACCTCGCAACTGATAAGAGCAGCATCTTAATTTTATCTTATAATACTCGCTCTGCA  
AAGCAAGTGCCTAAATCTCGCTCTTAAGAATTCATTTACATAGAGCTGCCGCTCTTCGCTGTAACGATCGT  
TTTATTGCCCTAGCTTTACTTATGCGAAGGCCTCGATGCTGCGCATCGAGTTTAGTTAAGTCNGTTTCGCTTC  
ATGCATTTGGTACGCATCGGCCACTTGCATTACTCAAATTATAACTAATAATTGTCGCTTCGCTAAAATT  
GGCACGTACTAATTCGGGTTTCGCTTGCCTATATACAAACTATTGTTCTTAAATAATAAGCACAGACCAATT  
CGGGTCTGCCTGCTTCTCGTAACCTTTAAGAAATATAAAACAATTTTGAACACAAAAAATAAATAGTTAATT  
ATTTCTATTTGTGAAAGCTATTGAAAAAGCTCAATAGCGCAACAGTCATAAACATACACTTTGAACAATTT  
AGATGCAATTGATTGGTTCGAACACCAAAGTTGCATAGCGTTCAAATCGTCTTGTAGACGAGAATGATGTA  
GGGAATTAGTGTATGATAGAAAAAGTTTGACATTGTCCGCATACATGAGTACACGGGCATGTGATATAAC  
AGAGGGGANATCATTATAAAAAAGAGTAAAGAGTAAAGGTCCAAGAAGATTA  
>160\_rnd-1\_family-116\_\_LTR\_\_Gypsy  
ATATAAGTTAACAACCTAAGCATAAATATATTGCCCTAGCAATTAAGTAGCTTCGTATTAACAATGCTGACG  
CGCCAGAACTGAGTTCAGCGCTCTGCGCTAAGAACGGCCAGCAGCGGTAAGCTGACACTGCATGGAATGC  
TGAGTCGGCTTGCCGACCATGCTTTGATGGCGTGATGCATTGAGGCTTAGGGTATTTGTATAATTTGCTTG  
TCCCCTAGTTTTTTAGTTTTATATGAGGCGCGCAACACATAAGTCGCCGAAATAAATATACTGCTCCGGCAT  
TGCCGATAAAACATATCTTTCGTAATATTGTCTGAGATCAAGGAGAACATATTTTGATCAAGGGCAGCGC  
GGGATCAACGCAACTTACCCAAGATAACATTGTGTTACATCGCAGAACATACATTAATGAATAACTGGCG  
CCCAACCAATAAATAGGAACCCATACCATGTAAGTTCATAAGTGATTTTCAGTTTGAAGAAATTATTCACG  
AACGCCACGTACCGATACGTGTGATTTTAAAAAAAAAAAAAAAAAAAAAAAAAAAAAAAAAATTGTAA  
AGTAAAGTAAATATTGCTGCTCTCTTCTGCCAGCATTTTCATTCTTTAAATCATTGCATACTTTCACTAAAA  
ACTGTTGCATACTTTTACCAGCGTTCCTTGTCAATAAAGCATTGCATACCTTAAACGAATAATTATTGCAT  
ACTTTTCGGCAGCATTACATTTTTTTGCTGCATACCCCTAACAAATTTTTTATAATAAATATTGCATACCCCAAG  
ATTCACCAGTTTCCACTATTGCCAACAGCGTTACCTGCCGATCTTTCTCGATCGGCCTAAGTTTGAAAAGT  
GCCAACCATAAGCCAATGAGTTGGAATTATAGGGAGATAAAAGTCGAATATAATAGTGACGATAGCTGG  
GAGGGGGAAATCAATTGCTCAGTAGATCCTACTCCTGCAGATACCGTTGTAAGTGAAGAAATGGAGCCGG  
CTCAAGTTCAGAATCTCATTGAGGGTGCCATCAGGCAAGCTTTAGCGCAACAACAAAATCAGTTTCAAGC  
ACAAATAACCGCTTTAGCTTCACAAGTACAGAGTTTGCAGGTGGAGGCGCCGCAAATCGTCACATACGAG  
AAAATATCCGTCGATCCNAACGCCAAATGCGATATTCCTTGACATTATTAAATCTGTGCCGGATTCTC  
CGGCGTACAGGATGAGTATGTAGCGTGAGGCAAGCAGCCATCTACGCGTACGAACCTATTCAAGAACTAT  
CCAAAGAGCACTGCACACTACCAAGCGGTAGCGATCATTAGGAACAAAATCAAAGGCCCAGCTGGAGCC  
TTACTAGTGTCTCACAACACTGTCCTAAATTTTCGATGCAATACTAGCTAGGCTAGATTGCACATACTCGGA  
CAAAACATCCTTGCGCTTGCTGAGACAATGTTTGGAGTTAGTTACGCAGGGCGAAATGTCCCTGATGCAA  
TACTACGATGACGTCGAAAAGAACTCACGCTCGTAACTAACAAAATTGTAATGTCTCACGACCAAGAAG  
GCGCGGATTTGCTCAACCGGGAGGTGAGAGACGACGCCTTGCACGCCTTTATCTCCGGTCTTAGGAAGCC  
GTTGAGAGCGGTTGTGTTCCCTGCACAACCAAAAGATCTACCATCCGCTCTGGCCCTTGCCAGAGAGGCA  
GAAGCTAGCATTGAGAGAAGCATGTTTCGCGAACTCTTACGCTAAAGCCTTGCAAGACCGAGCGCAAATTG  
CTGAAAGTAACAAAAACCGTGCCCAAGGCAAGCAAACCAGATTTAACAAAGATGAGCAAATCAGGAGA  
GAAATCCCCATTTTGTGAAACGCCAAAAGGGCGGTCCCCAGCCCCAGGCCCTAAAGATAATCAAACCTGA  
GGCTCCACAGCCCATGGAAGTTGACTCTTCTCCAGATTTAGACAAAAAACCGACTACAGCAAGCGTCAG  
GCTAATGAGTCCAACGCACCAAAACGCAAGAATTCGTCAGACCGTTCAACAGGTCAAAGACGACAACGC  
GTTAACAATGTCGTACAATCAGATTCCAAAGAAGCCGTAACAGAATTCGAGAAGGCGGCCAAAGAGGCA  
GTTGAAGAACTAGAGAGTGAGAACGAGTACGCACCTGGTGACGACTCGATTAATTTTTTLAGGGAACACTC  
CCGGCTTCCGTACATTGAACGACGGTTGGCTGGGAGAACTCTGAAGATGTTGATTGACACTGGCGCGGCA  
AAAAATTATGTGAAGCCCTTAACAGAGCTAAAGACCATAACGCCGGTCGCCAAGTCATTCTCGGTAAACT  
CGATCCACGGGTCTACCGAAATCAAGCGCAAATGCTTGATGAACATTTTCCAACATACCTCCCCGTTTTTT  
CTCCTCGATACCCTAAGTTCTTTTCGACGCCATCATAGGCTTCGACTTGCTAACACAAGCCGGAGTCAAATT  
GAACTTGGCAAAAAACACTCTGGAATACCAGAGTACATCCGAAAAACTCCAGTACTATCAATGTGCTGAT  
GTGAACCTTACCGATGTCAACGACATCGTAGTCCCCCTTCCGTAAAGAAAGAGTTCAGGGACATGATAC  
TCAGAAACAAAAGAGCCTTCTCAAATGCAGACGAAGCTCTCCCTTTTAATACTGCTGTTATCGCTACAATC  
CGAACAGTAGACAACGAGCCTGTGTATTCAAGATAACCCGAGTCTCATGGGTGTTTCTGACTTCATAAACA  
AAGAAGTCAAACAATTACTGGACGATGGCATAATCAGGCCCTCCAGATCGCCTTACAACAGCCCAACATG  
GGTGGTTGATAAAAAAGGCACTGACTCATACGGTAACCCAAAAAAAAGGTTGGTAATCGACTTCAGGAA  
ACTGAACGAAAAAACCATACCGGACCGCTACCCCATGCCGAGCATCCCATGATCTTAGCAAATCTAGGA

AAGGCGAAATACTTCACTACCTCGACCTAAAGTCGGGGTACCATCAAATTTACCTTGCGGAGCATGACC  
GCGAAAAGACTTCATTTTTCAGTAAGCAGCGGCAAGTACGAGTTCTGTGCGCTACCATTCGGCCTGCGCAA  
TGCAAGCAGCATATTCCAAAGGGCAATAGACGATATCCTGAGGGAACATATAGGAAAGATTTGCTTTGTC  
TATGTAGACGACGTCATAATTTTTTCTAAAAACGAAACGGAGCACCTTCAACACATTAACATTGTGTAAA  
ATGTCTAATCGACGCAAACATGCGTGTAGGCCCGAAAAGACTCGTTTCTTCAAGGAAAGTATCGAATTC  
CTGGGTTTCATTGTAACCAAAGACGGAGCAACATCCGACCCCAAAAAAGTTAAAGCCATTGAGGAATTCC  
CTGAACCAAAGAATGTCTACAGCGTTAGGTCCTTCTTGGGGTTAGCCAACTACTATAGGGTCTTTATTAAG  
GACTTTGCCGCTATAGCGCGTCCGATATCGGACATACTTAAAGGGGAAAATGGTTCAGTTAGTAGGCACG  
TATCAAAGAAAATCCCTGTTGAATTTAATGAAGTTCAACGCGATGCATTTACCGTCTGCGGAGTATTTTG  
GCATCAGAAGACGTCATGTTAATGTATCCAGACTTCCAGAAACCGTTCGATTTAACCCTGATGCTTCGGC  
CAGTGGAATTGGCGCGGTTCTTTCCCAAGGCAATAGGCCAATAACAATGATTTCTCGCGCCTTAAACAG  
GCCGAACAAAACCTATGCCACTAACGAAAGAGAATTGCTGGCCATTGTGTGGGCTTTAGGCAGATTGCAGA  
ACTTTCTGTACGGTTCTAGGGAAATTAACATTTTCACGGACCACCAGCCGCTCACGTTGCTGTGTCGGAC  
AAGAACACGAATTCCAAGATTAAGAAAGATGGAAATCTTACATTGACCAGCACAATGCCAAAATGTTTTATA  
AACCGGGCAAAGAGAATCTGGTGGCGGATGCCCTTTCAAGGCAAACATTAATGCTCTGCAAGATGGGCC  
CCGTTTCGGACGCTGCAACCGTTCACAGCGAACTTTCCCTGACCTACACGGTCGAGACAACAGACAAACCT  
TTGAATTGCTTTAGGAACCAGATTGTCCTAGAGGAATCGCGTTTTCCGCTAAAGCGAAACTTGTGTGCTGTT  
TCGCAGCAAAACACGCCACTTGATCAGTTACACTGACAAGAGCNCAATTCTCAAACCCCTCAAAGAAGTT  
GTGAATTCTGGAGTCGTTAATGCAATACATTGCGATCTTCCCACGTTGGCAAGTTTCCAACACGACCTGAT  
TTTGTATTTCCCTGCNACCCAATTCTGGCATTGCAAAAATCTTGTGCAAGATATAACGGACAAAACGAGC  
AGTTAGAAATCATCACTGCCGAGCACAATCGAGCGCACAGAGCAGCTCAGGAAAACATTAAACAAGTAC  
TTCGGGACTATTATTTTCCCAATATGGCCAGTCTGGCCAAAGAAGTGGTTGCAAACCTGCAGGGTCTGCACT  
AAAGCCAAATACGATAGGCACCCGAAGAAACAAGAACTCGGGGAAACGCCTATACCAAGTTATACTGGC  
GAAATGTTGCATATTGACATTTTCTCGACAGACAAGAAACAGTTCTTGACCTGCATAGACAAATTCTCAA  
ATTTGCAGTCGTCCAACCGATATTATCCAGAACGATAATCGATGTCACAAGCCCTCTACTGCAAATTGTTA  
ACTTTTTTCCCGCAACCAAGACAATTTATTGCGATAACGAGGCGGCCTTCAATTCCGAGACCATCACTTCG  
ATGCTCCGAAACGCCTACGGCATTGTCATTGTGAATGCGGCTCCGCTTCACAGCACCTCAAACGGCCAGG  
TGGAGCGCTTTCATAGCACCTGACCGAAATTGCGAGATGCCTCAAGTTAGACAAGAAAATCAGCGACAC  
TACAGAATTAATCTTAAAGGCTACGATAGAGTACAACAAAAGTTTGCCTCAGTAACCCTCGAGAAACCA  
ATTGAGGTCGTTTCATGCAGCAGCTTCTGATCGTCGCGGGAACGTCAAAGACAGGCTAATTAAGGCACAGC  
AAGACAATATCAAAGGTGCAATGCATCCAGGCAAAACCGCGTTTTTCGAGGTAGGAGAAAAGGTGTTCC  
AGAAGAACAACAAGAGGCTAGGGAACAAGTTAACTCCCTTATGCTCAGAACAAGGTGCAAGCAGACC  
TGGGAACGTCTGTCCTCATTAAGGGGAGGGTGGTCCATAAGGACAACCTGAAATAAGTTTTCTCTCCACAA  
TTAGCTAGTAAGCCAACTCAGAGTTTAAACACCGTCTTATATTGTTTCGTCCATTTTCAGGTTTGCCTCACTT  
TGCTTGTGGCACTAGCAGCGGTAAATGCTCGGATCACCGACTTCTCGCATGCCAACTACATTCCGGTCTTA  
GACGGGGAAGTACTGGTGTTCGATCAACGTAGCTACTTGAGGCACTCAAGTAACATTTCCGAATTTGTTA  
GTATGATAGACGAGACGGAAAGACTGTCCGATTCTTTCCACAGTCGCATATGCGCAAACCTACTAGACGT  
AGATACAGATCACCTTAGAACATTGTTGTCCGTTCTTCAAGTGCATCACAGATTTGCACGAAGCCTCGATT  
TCTTAGGCACTGCCTTGAAGTTGTTGCTGGCACCCCTGATGCTTCAGATTTCTTAAGGATCCGCGTTACA  
GAGACGCAGTTGGTGGAGGCTAACTCCAAACAGATACTAATAAACTCCGAAACTCAAAAACAAATAAAC  
AGACTGACGGACACTATCAACAAAATTATCAGTTCCCGCAAAGGCGATTTGGTTGACACTCCTCATTTATT  
CGAGACCCTGTTGGCAAGAAATAGAATACTGAACACAGAAATTCAAATTTAGTACTACCATAACGTTG  
GCAAAAGCAAGCATAGTAAATCCTACAATCCTTGATCATACCGATCTGAAATCACTTATCGAACAAGATA  
CCCCAATAGTTAGCTTAATAGAAGCTTCTAAGATCAAGGTCTTCAGTCCGAGAATATTATCCACATATTA  
ATAGCCTACCCTAAAGTTGAGTTTAGGTTGCCGAAAGGTCTCCGTCTACCCCGTTTCACACCAACGAACCGT  
TCTGCGACTCGACGAAGACACGTTGGCGGAATGCGAAAAGGATACCTTTGCAGTTACCGGATGCACCGTA  
ACTACGCATAACACCTTCTGCGAACGAGCACGGCGCGAAACCTGTGCTAGCTCCCTTCACGCGGGGGGTA  
CAGCCCATTGCCAAACGCAGCCGAGTCATCTTGCCCCTGTCACCATAGTGGACGACGGCGTCGTCGTCATT  
AACGATCGTAGCGCAATACTCGCCTACGACGATTGCGCTGCGATGAAGATAGATGGGACAAACCTCGTCA  
CCTTCTCGTCCTATGCCACCGTAAATGGCACGCGATACTTCAATCGCAAGAGCGTGCAAAATCGGTTCCCG  
GTGGTAGCGGCATCACCGTTGCTTAACATCAGCGGCCATGACTCGATACTCAGCCTTCCCTACATTACCG  
CCTGAGTGAAAACAACCTTAACTACATCAAAGAGGTCAGAGACAGTATTGCAGTCGGAAATACATTGGCG  
ATTTCTTTCGGCATAATGCTGTTGGCCTGTGCTGTGGGGGCTGGAGTCTACTGGCTCCATAGGCTGACAAT  
CAAGCGTCGAAACTCCCGGAAGATCTCGAAGATATTGGAAAACCTAAATGCGACCGAGGACGGTTCGATCC

TCGAGAGGGGGAGTAGTTAACCCTGACTATTGGTATGTGCTGACCCAGCGTTCTGGGGGAAGCCAATGAC  
CAGAGTCATGTGGCGACGGATATGTCGCAACTATGTCACCGGCCGCGACGGTCATCCGACACCGCACACG  
AGGCGCTAACGCTGCACTTTTTCGAGAGCGGCGGCAGCGGTTCTACAGCAGCAACGGCGGCTCTGGGGCA  
GCGACGGCGGCTCTGCAGGCATTGCTTAGATTGATAAAGATTGTATTTTTTTAGTCTAAGTTAGGAAACAAT  
AAAAGCGCGACGTATCGTCCCTTAAAGTCTCCCGTTAGTTAACTCATTTTTTTATATGCATTTTTTANATGCAA  
CCGGCAAACCCAAAGTTGCAGACATNAATGCACTAATTTGCACACAACCTAAAAAACCAATACAAAAA  
AAAAACGCGATAAAACGGTTTCAAACTCCAGTTGTGACGGCAGCGGTGGAATTCATCAAAAATACACAA  
ATACACAACAATAGAATCATGTAAGTGATTTGTGAAGTGAGAATAGAAAATTTTCGAGAACAATTTTTTTTT  
TCGAATACGCACAAATTAATTTTTGTAAAGTAAGAAAAGGAGTGTCTATTTCTGATTGAGGAAAAAATTT  
ATGAGAATTATTTAAAAAAGAAAAAATAAAAAATCCCATTAGCTTAACCTTTTATGTGTTG  
TTCGGTTTCATACAGAGGTTTAAATTCGAATGAGCGACTGTGACTCCGACGTAGACGCGCATGAACACTA  
CGATAGCGACGACAGTATTTTAGCGAGGTTAATAGGGGGATTTGGAACATTGCAGGTATCAGGTTGTGTC  
ACCCCAACTGAACATAATACAGAAACAGACTCAGTTATGGACCCAGAGCAGTTGCGTGCGATAATTGAGG  
CCGCAGTGCAGGAGCGCACTCACAGCGCAGGCGCAAGAATTCGCGAATAGGGAAGCTACGCTAAGGCAAG  
AGCTTCAACAACAATTTGCGCAGGTATCGAATAAGCTAAGAAACACACAACCTTCAGTCCCGGTAGTAAA  
GGTTTACAGGGAAGTTGAAATCATAGACGGGGTGAATGTAATGAGCCGCTCGACGTGGTAAAAATGTCTT  
ACCGAGTTCCATGGGACTCAAGACACTTACGTGTCCTGGAGGCAGGCCGCGCATGCCGCCTATAAAATTT  
TCAAAAAATACGACGGTAGTTCACGTCACTACCAAGCCACCGCAATCATTAGGAGTAAAGTGAGAGGCC  
GGCAGACGCGGTTCTCGCCTCGTTTAAACACGCCGTTAACTTTGAGGCCATCATAGCGAGGATGGACTTC  
ACTTATAGTGATAAGCGGCCTATCCATGTAGTTGAACAGGAAATGGGTACGCTTAGGCAGGGCGGCATGT  
CCATTCTACAGTACTACGATGAGGTTGAAAAGAACTCACGTTACTCACAAATAAAGCCCATATGTCATA  
TGACAGCAATCTGGCAGCGGGAATGTGTGAAAAATTCAGGGGTGACGCACTTCGCGTATTTATCTCTGGA  
TTAAACGCAGTCTAACCGATGTGTTGTTTTCGGCTCACCCCTCGGATCTACCGACGGCACTAGCGCTAGC  
CCAGGAGGTCGAGGCTAATCACGAGAGATATGCCTTCGCGACAAGTTTTGCTAGGGGGCAGGAAGAGCG  
ATCTCGTCCAGAGCAGCGCCCAAGGGCGCCAGCAACAACAACAGCAAGAAAAAAGCAATTCTCTCA  
GGGTGGCCAGGGCAAGAATCCTCATTTCAGAAGCAGAACGGCCAATCCACAGACAAAGCCCAGAATAG  
AGCTGGGGCCGATGCCCCAGTTCCCATGGAAGTCGACCCTTCTTCTTCCAGGTTTAGGCAACCCACAACT  
TTTCGAATTCCCAGGGCTCGGCTAAGTTTAAACGCCAGCCAAGGTCAGGGAAATAAACGCTCCGCCGGATC  
GGAACGCGCGACAGGCCAAAGGAGGCAAGGGGTAGACCACGTCCAGGCGAGCGAGGCCGAGAGCGCAG  
GGTACACCGACGCGGCACAAGAGGCGTCAGACGAACAACAAGACGAACATAGCCCTGATTATGATAGCG  
ATAGCGCTAATTTTTTTAGGGGAAGGTCCCTGCTACCGTTCATTTCGACGGAGAATAGCGGGGGTAGATATG  
AGATTTTTAATCGACACGGGTGCGTCAAAAAATTACATCAGACCGCACAAACGCCTTAAAGGCGTCGTCC  
CGGTCGAGTCCCCCTTCGTTGTCCACTCCATTTCATGGGTCCAACAACATCGCCGAAAAATGCAAGTTATCC  
ATGCTTGGGTGCGACACATATTTTTTCTACTAGATTCTTTATCCACTTTTGATGGAATCATAGGGCTGGAC  
CTGCTAAAGCAGGTGGGAGCGGTTTTATGCCTAAAAAAGGTATGTTAATATTTGGTGCGACTTCGGAAG  
CGTTGCAGTACCACAAATGTGTGAGCGTTAATCACACGAAAAATAAGGAAGTAGAGGCACCACCTGCGGT  
GAAGGCAGATTTCTGCGAGTACTTCATCGAAACAACAAGGCTTTTGCGGACTCCAACGAGGCGCTGCCT  
TATAACACGGCTGTTGTGGCCACGATCCGTACGACCGACGAAAATGTGGTCTACTCAAAGCTATACCCCT  
ACCCTAGGGGTGTAGAGGATTTTGTGCTTTCAGAAGTCAACGAACACTACTAAAAACGGTATAATTAGAAA  
GTCGAAATCGCCCT

>160\_rnd-1\_family-246\_\_LTR\_\_Gypsy

CGTCGTGAAGTGAGCTTCGCTGATCGCACAGCTTTTCTAGATAAACTCCTTGACTTGATTAATCCAAATGC  
GGTTAATGACCTCTATTGCAACCTGCATACATTATCACAGCTGAGCGTGGCTTAGTTCGCATGTTTCCAGG  
CACAAAGTTCTGGCACTGCAAAAACCGAGTTGCAGATGTCTTCAACGTTGACGAGAGGAGAGAAATTCTC  
GTTGCCGAACATACTAGAGCGCATAGAGCAGGTCAAGAAAATGTAAAGCAAGTGTTATCAGAATACTATT  
TCCCTAAAATGGCTAAGTTGGCTAAAGAAATTGCGGAAAGTTGTAGAATCTGCTAATCAGTCAAATACGA  
TAGGCACCAGAAAAGACAGGAGCTGGTAGAACTTCGATCCATGAGACTCCTGGGGAATTTCTACACATT  
GATATATTTCCACGGACAAACAATTTTTTTTTGTCTGTGTTGATGACGATGTTTGGTTAAGTAACCATCA  
GAGACAACACCGACTGCGTGCAGTAACAGCAGAAGACAACAATCATACTTGCAAACCTAGAGCAAATATT  
GTTTGGGAGCTGTTTGTAAGCTGCTGCCATTCTATTTTCGTAGGCCCTTTGCCTTCTGCACGAATGCCCGCT  
GCCACCGTTTTTGAGCGCAGCTCCATTTCTGTTACAAGTCATTAGTTTTTCATTTGATCGCAACCGAGGCAC  
AACTATTTTCGAGTTGGCAAACAATATTAACAATAATTGCTAATAAGTGTAAGTCGAAACACGAGGGAAGC  
GCATGAGCCGCAAGCGGCCGTTGTGAAAAGCACACAATAGCTTAGGTAATGTTGATCAATCTTTTGTA  
TTTAGNTTTAATCCGGCTTTTACTGAGNCACATCTCAGCGACTTTGCGCATAAATTTAGCGTATCGGCCT



AGTGTTTTACAAATAATAAAAATAATCAAAAATAAAGTCTTATAACGAAAATCCGCGAGGACTTCTTATTTA  
AATTTTAATTTGCGCCAAACGTTTTTTCGCTTTTTGTGCTATAATTATATTGTGTGCGGTGCAGTGTAAGAA  
CTAATCTACCAGNACAACACACTTCGCGTTGTGTAATAGCAATACCCAACCTACCAGTGCAAGCAAAAAA  
GCTGTGCCTGACCTATTCTATTTACAGCACAAGCCCAACAAAAAGGCATTTGATAGCGACTTGTACCAA  
GCAAGCGGGTTTGGGCAGCGAAGTAAGCCAACACCCATAGACTTCAGCGAGGGATCATAAGAAAGCATT  
CACGTCTGCAGCGTGGGAAGCAGTAGTTTTTAGACGTAGAGCATACTGCCCTTGTAGGATCAAAAAAATG  
TAAGTGGCCCATCATTTGGCACAACTTTTTTCAATATGATTGATTTATTTCAAATAAAAATCCAAAGTCTG  
AAATATAAAAAAATTGCAATAATTGTGCTACCAACTAATTTTGAGTAACACAATTTTGCATCCATCAGCAAT  
TTTCAATAAACTCTCCTAATTCAGCATTCATTTAATTTATTGTTGTTGATTTGCCCTTGAAATTGTGTTGTTA  
TTATTGTTGACAGTATAGTGGATGAACAGCTCGTTTCTCAGGTACAGAGACAGCTCTGCGAGGGGATTTG  
AGTAAAACGACTTCAACACCTTAAATAGGGAAGCCGTCCCGCAAGAAATCGGTGACAACAGGTGTAAAA  
TGGAAATGGAGCCTTAGCAGCTTAGGGCTTTGGTGCAGGCCGCGAGTGGCCTCCGCCTTTGAAGCCGAAAG  
CGCAGTATTGAAGCAAAGAGATGTAGAACTGAGGGCTTCCTTAAACGCTTGGATACAAGAATTGGAAGGC  
AGAATATCTGCCAGTAGTATAGAAACACAGTAGTATAGAAACCACCGTCCAGGCATTTGAGCCGGTGGA  
ATCAGAAAGGACGTGCAATGTAATGAACCGTTGGACGCCGTTAAATGCTTACCAGAATTTACGGGGGTGC  
CAGAGACGTACGCCTTTTGGAGACAAGCTGCGATAGCGGCATATAAAATGTACAAGCCATACGACGGCA  
GCTCACGCCACTACCAGGAGGTCAATTATTATTAAGAGCAAAATTAGAGGGGCATTAGAGCGACTTTTTGG  
ATCAGTTTGGCATAGTAATGAATTTTGATGCCATAATAAGCCGTCTCGATTTAACATACAGGGATAAGAG  
AGGCATTAACGTCTGATAGAGCAAGAGATGAGCACCTAAGACAATTTTATGACAAGGTTGACAAAAAGCTT  
ACTCTTCTCACCAATAAGGTCAACATGTGCTAGAAACCAAGCATGGCACAAGGGCTCTGTACGAAGATCA  
GAGATGGTGCCTTGCCTGATTTTGTCTCAGACCTAAGGCGTAGCCTGACAGATGTCCTGTTTCGCGGCAA  
GCCTAAGGGCTTACCGTCCGGCCCTAGCTCTAGCGCAAGAGGTAGAGGAAAACCATGAGAGGTACGTATTT  
GCCGCTAGCTTCGCTCAAGGGCAAGAAGATAGGGAACGAAAAGTGACCCCGAGGCCGCGAGGTCCGTCAG  
CAAGATAAGGGTCAACAGCTGGGGGATCCGCAACCCAGCGGTTCCAAAAATCCTCGCTTCAAAAAACACC  
AGAAACAGCAATAAAGTCAATTTGAGCAACAGAGTGGCAGGTGTGTTCTACAACAACCGTAGGCACAG  
CCTACTTTAACTCTTGCGGTCTCAAGCCTACAAAAGTACGGCCACGTCTGGGCGCTTAAGCGGACAGAG  
GAGGCGGATAGTCAATCACACAGCTCACGAGCTTGACCAAGATTCAGGTTTCGTATGCTAGCTCTGCAGCA  
GCAGCAGAACAGCAAATTGCCGACGACAATGGTAGCGGGTATGATTCAGACACTCTCAATTTTTTAGGGG  
AAGCTCCCTGCTGCCGTACATCAGTGGAGTAGCAATGATCCAGATGAGATTTCTCATCGACACGGGCGCT  
TCCAAGATATTTATCAGGTCATATAAAATCTAAAATGTGTGTGCCCAGTAAATTCTTCCTTCCCTACCCATT  
CTGTACACGGCACCACGAAGATCACTCATAAGTGCCTCCTTATATCTCTGTTTCGACAAAACCTGCCAAATTT  
TTCTTACTCCCAGACCTATCCACATTTGATGGAATTGTGGGGCTCGCCTTGCTCACGCAAGCAGGAGTGT  
GCTTTGTCTTTCTTCTGGCCAACTCAAATGTGGCGCAGCAACTGAACAAATCGAATTCACAGGTGTGCGG  
ATTTTTACTTTACCAATTTTGACTGCGCCGACGCGCCCGATGCTGCAAAATATGCATTCCTAAAGATGCTA  
AAAAGCAAACATAAGGCCTTCGCGGATCCGGAANAAGCACTTCCATATAACACATCAGTGGTGGCCACTA  
TCAGGACCACTGATGAACAACCAAGTGTGCGGACATAACAGTACCCCTATCCCATGGGAGCAGCGGAATTCA  
TTAATAAAGAGATTCAAAGCCTTCTGAAGAACGGTATCTTAAAAAAATCTGTTTGCTCCTACAAAAACCC  
CATTTGGGTGATGAACAAGAAGGGGACGGACGAGTTTGGTGACAAGAATATGCGTCTCGTAATGGATTTT  
CGAAGCTTAACGAGAAAAACCATCGCAGACAGATACCCTATGCCTAACATTCCAATGATTTTGGGGAATC  
TTGGCAAAGCTAAATACTTTTCGACATTGGCTATCACCAGATCACGCTAGCAGAGCGTGACCGTGAAAAA  
ACAGCCTTTGCAGTTAACTTGGGGAAGTACGAATTTTCGTCGACTTTCCTTTGGGTTGAAGAATGCGGCCAG  
TATCTTCCAAAGAACTGTTGACGTCTGACTGCGTGAGCAATTTGGCAAATCTTGCTATGTCTATGTTGACG  
ATGTCATCGTCTTCTCAAAGATGAAAATTCTCATGTCCAACATTTGGAGTGGGTCTTAAAGAGCTTGTAC  
GAGGCAAATATGAGAATCTCCAAGGAAAAATCGTGTTTTTCTAAGAAAAGCGTAGGTTTTCTTGTTTTCGT  
GGTAACTAGTAATGGAGCAACAACGCACCCTGAAAAAGTCAACGCGATTCAGGAGTTCCAGTACCAAA  
GAATATATTGAGATCAGATCATTTTTAGGACTGGCCAGTTACTATAGGTGTTTCATCAAAGGCTTTGCCT  
CAAGAGCAAAACCCATTTCTGATCTTCTCAAGGGCGAGGATGGGTGAGTAAGTAAACATAGAAGGCGAA  
ACATCCCGGCTGAATTTCTGAGCTACAGCGCCACGCATTCCAAAAGCTTCGCAGCATTTTGTCAATTAGAA  
AACGTCATGGTCAGATACCCTGACCTTAAGACACCGTTTGATCTAACGCTTCAGCTTACGGCATAGGGGC  
AGTGCTTTCTCAAGAGGGCCATCTCAATGATTTCCAGAACATTGAAACCCCTATATGGGGTACCTATATG  
GGGTAAACGACATTAACATTTTCACGTCTGTAAGTGAGCTTCGCTGATCGCACAGCTTTTCTAGATAAACT  
CCTTGACTTGATTAATCCAAATGCGGTAAATGACCTCTATTGCAACCTGCATACATTATCACAGCTGAGCG  
TGGCTTAGTTTCGCATGTTTCCAGGCACAAAGTTCTGGCACTGCAAAAACCGAGTTGCAGATGTCTTCAACG  
TTGACGAGAGGAGAGAAATTCTCGTTGCTGAACATACTAGAGCGCATAGAGCAGCTCAAGAAAATGTAA

GCAAGTGTATATCAGAATACTATTTCCCTAAAATGGCTAAGTTGGCTAAAGAAATTGCGGAAAGTTGTAGA  
ATCTGCTAATCAGTCAAATACGATAGGCACCAGAAAAGACAGGAGCTGGTAGAAGCTTCGATCCATGAG  
ACTCCTGGGGAATTTCTACACATTGATATATTTCCCACGGACAAACAATTTTTTTTGTCTGTGTTGATAAG  
TTCTCTAAATTTGCAGTCGCACAACCAATTCAGTCACGCACTATCGGGGACTTAAAAGCTACACTTCTGCA  
GCACATGAATTTCTTTTCACGAGCCGGAAAAAGAGATATGGACCACCGCAAACGTTGAGAAATGTCTACG  
CAAGTGAGGAAGAAGTTTTTGTCTGTGAAAAGATATCAATTTGTAACATTTCTCCCGTTAGTTGGGAGACT  
GACGTCTGGCCGAGCTCATTTTTTCGGGTGTCTGTTGTACTTTGATTTTTGTGCAAACCTTTACAATTTAAGACA  
ACTTCGTTAGAAAATTTAATGTTATTTTGGGAAAATAGTATTCCGACACGACCTGTTTCACAAGTCCCTTA  
GTAAGTAGTATTGGAACTAGCCAAAGCTGGAAGACAACATTTAAATGCATTAACCACGTTTGGGTAAAT  
GACGATGTTTGGTCAAGAGACAACACCGACTGCGTGCAGTAACAGCAGAAGACAACAATCATACTTGCA  
AACTAGAGCAAATATTGTTTGGGAGCTGTTTGTAAAGCTGCTGCCCATTTCTATTTTCGTAGGCCCTTTGCCTTC  
TGCACGAATGCCCGCTGCCACCGTTTTGAGCGCAGCTCCATTTTCGTTACAAGTCATTAGTTTTTTCATTTGA  
TCGCAACCGAGGCACAACACTATTTTCGAGTTGGCAAACAATATTAACAATAATTGCTAATAAGTGTAAGTCG  
AAACAAAGAATATTGTTTCATTTGATTGCAAAAAGGCTTGCAACTACAAGTTAACAGAGCCCAAGTACACC  
AGCTCCAGATGCTGATATAGCACTGNGCCGGATGTTCTNACGAGTTAACAGGGGTCAGCAAAATGCAATN  
TAACACCAGCCACAGATGCTGACATAGCTCTGCGCCGGATGTTCTTGCACGAGGGAAGCGCACGAGCCGC  
AAGCGGCCGTTGTGAAAAGCACACAATAGCTTAGGTAATGTTGATCAATCTTTTGTAAATTTAGTTTTTAA  
TCCGGCTTTTCACTGAGGCACATCCCAGCGACTTCGCGCATAAATTTAGCGTATCGGCCTAGTGTTTTACAA  
AAATAATAAAATAATCAAAATAAAGTCCTATAACGAAAATCCGCGAGGACTTCTTATTTAAATCTTAATT  
GGCGCCCAACGTTTTTTCGGACCATTTTGTCTATAATTATTTTGTGTGCTGTGCAGTGTAAGAACTAATCT  
ACCAGTACAAGACACTTCGCGCTGTGTAANAGCAATACCCAACCTACCAGTGCAAACAATAAAAGCTGTG  
CCTGACCTACATCAATTTACGTCAGCGGCGCAAGCCCAATAAAAAGCCATTTGATACACCGAAGCCGCTG  
GAGCTCTTCGGGCAGCGACTTGTACCAAACCAGCGCGCAAGCGGGTTTGGGCAGCGAAGTAAACCAAC  
ACCCATAGACTTCAGCGAGGGATCATAAAAAAGCATTTCGCGACTGCAGCGTGGGAAGCAGTAGTTTTAGA  
CGTAGAGCATAACAACCCTTNTAGGATCAAATAAAATGTAAGTGGGCCATCATTTGGCACAAACTTTTTTCA  
ATTTGCGTGATTTATTTAAAATAAAATCCAAAAATACATAAGTGAGAAATATTTAAATTTGCAGTAATTGT  
GTTCCCAACTTACTTTGAGTAACACAATTTTGCATCCATCAGCAATTTTCAATAAACTCTCCTCTGTCAGCA  
TTCATTTAATTTACTGTTGTTGATTTGCCCTTGAAATTGTGTTGTTATTATTGTTGACAGTATAGTCCATGA  
ACAGCTCGTTTTCTCAGGTACAGAGACCGCTCTGCGAGGGGATCTGAGTCAGACGACTCCACCACCTTAGA  
TAGGGAAGCCGTCCTCGCAAAAAATCGCTGACAACAGGTGTAAAATAGGAATGGAGCCTGAGCAGCTTAG  
GGCTTTGGTGACAGGCCGAGTGGCCTCCGCCTTAGAAGCACAGAGCGCAGTATTGAAGCAAAGAGATGCA  
GAGCTGAGGGCTTCCTTAAACGCTCGGATACAAGAATTGGCAGGCAGAATATCTGCCAGTAGTATAGAAA  
CACCGCCGGTCCAGGCATTTGAGCCGGTGGAAATCAGAAACGACGTCCAATGTAATGAACCATTTGGACGC  
CGTTAAATGCTTACCAGAATTTACGGGGGTGCCAGAGACGTACGCCTCTTGGAGACAAGCTGCGATAGCG  
GCATATAAAATTTACAAGCCATACGACGGCAGCTCACGCCACTACCAGGCGGTCATTATTATNAAGAGCA  
AAATTAGAGGGGCAGCTGACGGCGTTTTTGGGTGAGTTTGGCACAGTAATGAATTTTGATGCCATAATAAA  
CCGTCTCGATTTACATACAGGGATAAGAGAGGCATTCACGTCATAGAGCAAGAGATGAGCACCCCTAAGA  
CAGGGCTCGTTAACAATTTTACAATACTATGACGAGGTTGAGAAAAAGCTTACTCTTCTCACCAATAAGGT  
CAACATGTCCTACGAACCAAGCATGGCACAAGGGCTCTGTACGAAGTTCAGAGATGATGCGTTGCGTGTT  
TTTTGTCTCAGGCCTAAAGCGTAGCCTGACGGATGTCCTGTTTCGCGGCAAAGCCTAAGGACTTACCGTCGGC  
CCTAGCTCTAGCGCAAGAGGTAGAGGCAAACCATGAGAGGTACGCCTTTGCCGCTAGCTTCGCTAAAGGG  
CAAGAAGATAGGGAACGAAAAGTGACCCCGAGGCCGAGGTCCGTCAGCAAGATAGGGGTCAACAGCAG  
GGGGATCCGCAACCCAGCGGCTCCAAAAATCCTCACTTCACAAAACAACAGAAACAGCAACAAAGTCAA  
TTTGAGCAACAGAGTGGCAGGTGGAACAAAGGTGGCGGGTCACAGGAACCAATGGACGTCGATCCATCT  
GTGTCAAAAATTCTACAACCATCGCAAGCACCAGCCTACGTTAACTCTAGCGCTCCTCAAGCCTACAAAA  
GAACGGCCACGTCTGGGCGCTTAAGCGGACAGAGGAGGCAGAGAGTCAATCACACAGCTCACGAGCCTG  
ATCAAGATTTCAGGTTTCGTATGCTAGCTCTGCAGCAGCAGCAGACAGCAAATTGCCGACGACAATGGTAG  
CGGGTATGACTCAGACACTCTCAATTTTTTAGGGGAAGCTCCCTGCTGCCCTACATCAGTAGGAGAGTAGC  
AGGGATCCAGATGAGATTTCTCATCGACACGGGCGCTTCCAAGAATTATATCAGGCCACATAAAAAATCTA  
AAAGGTGTGTGCCAGTAAATTCTTCCTTCTCTACCCATTCTATACACGGCACCACGAAGATCACTCATAA  
GTGCCTTATATCTCTGTTTCGGCAAACTGCCACATTTTTCTTACTCCAGACCTGTCCACATTTGATGGAAT  
TGTGGGCCTCGACTTGCTCACGCAAGCAGGAGTGTGCTTTTGTCTTTCTTCTGGCCAACCTCAAATGTGGCG  
CAGAACTGAACAAATCGAATTCCACAGGTGCGCGGATGTTAACTTTACCAATGTTGACTGCGCCGACGC  
GCCCCGATGCTGTAAAAGATGCATTCCTAAAGATGCTAAAAAGCAAACATAAGGCCTTCGCGGATCCGGAA

GAAGCACTTCCCTATAACACATCAGTGGTGGCAACCATCAGGACCACTGATGAACAACCAAGTTTATGTCC  
GACTGTACCCCTACCCCATGGGAGCAGCGGAATTTCGTTAATAAAGAAATTCAAAGCCTTCTGAAGAACGG  
TATCATCAAAAAATCTGTTTCCCCCTACAACAACCCCATTTGGGTGGTGGACAAGAAGGGGACGGACGAG  
TTTGGTAACAAGAATATGCGCCTCGTAATGGATTTTCGCAAACCTTAACGAGAAAAACCATCGCAGACAGAT  
ACCCTATGCCTAACATTCCAATGATTTTGGGGAATCTTGGCAAAGCTAAATACTTTTCGACATTGGACCTA  
AAATCCGGCTATCACCAGATCACGCTAGCAGAGCGTGACCGTGAAAAAACAGCCTTTGCAGTTAACGGGG  
GGAAGTACGAATTTTGTGCGACTTCCCTTTGGGTTGAAGAATGCGGCCAGCATCTTCCAAAGAACTGTTGAC  
GACGTACTGCGTGAGCAAATTGGCAAATCTTGCTATGTCTACGTTGACGATGTCATCGTCTTCTCAAAGA  
CGAAAATTCTCATGTCCAACATGTAGAGCGGGTCTTAAAGAGCCTGTACGAGGCCAAATATGAGAATCTCC  
AAGGAAAAATCGCGTTTTTTAAGAAAAGCGTAGGTTTTCTTGGTTTTCTGTGGTAACCAGTAATGGAGCTAC  
AACGGACCCCGAAAAAGTCAAAGCGATTCAGGAGTTCCCAGAACCAGAAAGTAATATATTCGAGATCAGATC  
ATTTTATAGGACTGGCCAGTTACTATAGGTGTTTCATCAAAGACTTTGCCTCAATAGCAAAACCCATTTCTG  
ATCTTCTAAAGGGCGAGAATGGGTCAGTAAGTAAACATAGATCGCGAAACA

>9\_rnd-6\_family-112\_\_LTR\_\_Gypsy  
TGTGATGGGGTGATGAGTTTTATTTCTGTAAACATAAACATACATTGCCATTGGCATGATCAGCTGATCGC  
AATCAGCTTGAATAGGCAGCACTGCACCATAACATTTATGCAATTACATATGATCAGCGGAGGTTAATAA  
CATAACCAGAGTGACCATGACCTATGTTAATGACGCCGTTGCGAATGAAAATATCGTGTCTTGGGTGAAT  
GCTAAATTGCTTCTTTTAGTTTTGGCGAGGCGTCATTCTTTTTCCATTTTAATCGCCAACGAGTACAGTCGG  
TTTAGATTGCTTTAAAAATTATAAAATTCAATTTTTACGTGGGCGTAATAAACCCACGTGTATCGGCACT  
CAAGCTCAAAAAAAAAAAAAAAAAATAATTAAATAAAAGGGAAGGAAAAAGGTCCAAGGTGCCCAGAAAGAA  
AAGGGGTAATATAGACATCATGCGCTCCCAAGAGCTTGGCTATAACATTTACCGGAATAAAGAAAAATTT  
TCAGAATTCGGACACTGACAAATATTCACTAAAGGATCGTTACTGGAGTCGTGGGGTGCTTTCTCTGTGTG  
TGGTAGTCGTAGGAAGGTGCAGGCTAAAGCGCGGGGCTGCGTTATTGCGTGCCAAAAAGAAAAATTACG  
CATAACGCGTAGTCCTTATCGGAGCCAAAGCCAAGGCCCAAGCACCAAAAAGCGACAATCTACACTG  
GTAGCAGGGAGCGAATTTCTAAGGGCGGACCAAGATTTACGCATCGTCTCATTTTCTGCAGATAAGCTTT  
GAACCTCGCTAACCAATAGTTCGTGCTGCACGCACAGGCAGACCAACGTGACCACGTGTTTCGACCCATTG  
ATTCCCGGACATTCTTGAGCGCAGATCTGGTGGATAGCGAACCAGCGCGCACCCCTCACTCGGATTTACAA  
CATCTGATATAATTGTTAAACGGCATACTGGCCGTAGGTATAAGCGAAGGGCATAAGTACACATGAAATT  
TAAATTGCAATTCTTTCCGTTTTATATCGCTGACATTGTCTTTTCGATCCTGATTTAGCATGTATATGTGCT  
GACTACTATATTTCTACGTTACATAGTTCAAATTAAGAGCCACAGCACATCATCGTCGTCAACAGGCCTG  
CTGACATCGTTGGATCATACTAAAGTAGTGAGTACTGTGTGAAAGAACAAGATAATAAGCCAACATAT  
CGAATTGTACGTATTGTTTGAATCGCGGTTATAGTCAGCGGGTGTACTCCTAATCAGCCTTCGTAATTACA  
AATAACTTTTGTGGATCATTACAGATCAGCAGTGATTAACTTCATATTAGTTTCGAAGTGTAATCTCATTCA  
TGTGTGTTTTTGCCCAGATTGAGTTTAGTTTTATAAAAAAAAAAATAGAAAAACGTTGTTCTTCTCACGTAA  
TGTATAATGAAGTACGATCATGAGTTTAAATCTTCTTTGAATACACTTATATGATAAAATGAAATCTTAAT  
TCCTTTTTTGGGCACCTTAGGTAAATAGTATCGCATACANAAGGGTAGTTGCAACGACAATCGCAGATGCA  
GCTACAGGCAGGGTGGGTGAAGACCGAGGGTAGCCAACATCTTAGCTCCTCGGCTCTATATGATATATTC  
TGCTTGCAGATCGTAGTCGCTCCTTATATATCGTGGTATTCCGTCNTACCTTAACTCTGTCTACCTTTTTTTT  
CTTTATTATACTTGACGCGTCGAGTGTGTTAGGGAGCAAAAGAACCCACGCCACTTCCCTGAGCACGGTC  
GGAACCCGTAGACGGAGTACGCTCCCAATGCACAACACGAGTGTTAGGCAAGACGCGCCAGCGTAGCC  
GTCGTGTTTCGTTACATGATAAAATAATAAGAAAAATGGCGCCCAACGTGGGGGCCGAACCTTCTGCTCTTC  
CGTTCTCACCCCCGAGATCCGGAATTGGCCCACAAGAACTTAGGAGAGAGCCGATAGCATTGTTTCGTTA  
CATGATTTGTCACGAGCCAATGTGGACGATCCTANGTTAAATCCATGCTAGCTTTCACCCTTCTTCCTATCC  
TTATCACAAATATACCATCCAAATAATTTTAGTTTCCGTGACGACATTTATCCTCTCTTGGAACCTGCTGGTAT  
TCTGATGTCTTTTGTGTTGGAGCCAGACCAGGAAGTAAATAGTCGAGCGATTTATTTAGTGGATCAGTTATAC  
TGTTCCACTAGAAATCTTATTATGTTTTCGCCACTTTTGATTCATTTAGGACTTTTAGATCTGATTTTCGAGT  
CGTTTCTCTACCAAGTGATAGAAGGTTGGTAGGGCATAATAACATTCCGTTTGTCTAGTTGAATTGAGAA  
TTGTTCTGGTTGGGTTATTTGCGACTCGTCCCTCTTCAACTTAGTTTCAGACAACTCAACACTGATTTAGTAAA  
ATAGTTTGCTTGCTTTTCGTAAGAAGATATATCAAACATAGAGATTTAGATTATGCGATGTATTTACCTAA  
GGATAAGTCCCATGTTATAAAATGTTATAATATTGTTGTATTAGCATCGAAGTGCCTTAAACCTTTTCTTTC  
TGCCTTAAAACCGTTTCCGATTTTCATAATTATCGCTCATTAGCGCTTCTCGTATATATCTTAAAATTAAAA  
TCCTTTTCGGGATCAATTCCCATTTAACTCTTTGACCAATTATAATCGATTTATTGATGATGGCTGTCGTTTCG  
TAGTCAGGAAAATTTAACTCTCAGCGAAGCACCTGCAGTGTGTACTATCTGCAATGAATCATCGATTGGTG  
ATGCAGACACTGTAGAACTCCATGTGCTCATAAATTTATCGAAATTGCCTAAATCAATGGTTAAGAAG

CAATGAGACATGTCCCCTTGCACAAACGAGTTTGTAGTCGAGAATTATACGAAGATAGCAGTGACTTGAAT  
GCAGTAGCTTCACAAAGACCTACAAACACGGGGGCCGTTCTCGGTCCCGAACTATTACCCGAAGTAATG  
CTCGAAATACTCCTAAAGCCGCCAGAGGTCGTCTAGTGGGCGGACCAACTCTCGGGAGCAAGCGGGATC  
GCGAAACACCCCAACCTTCTAAGGAATCGCTTGGTTTGTGAGAACAGCGTGTGCAGTTGCTTATCAGTAAG  
ACATTGGAAGCCCATAAGGCTGAAATGGCGTCCTATTTGTCCGAAGAATTAAATGCCGCAGTTAGAAATT  
TAACTTGTATCAGGAGCCACGTGAGGAACCCCAATTAGAATGGGAAAATGATTTTCCACGTGATGCACC  
GCGATCGAACAACGCTTCGAGATTACCGAATGCTAGTGTTTCAGTCTGATGCGAGACGTGAATACGCAGTC  
GATAGGCCCGACAAAATATCGAGTGTGATATCCAATTGGGATGTCAGATTTTCAGGCGTGGCTAGTGATA  
TCCCAGTCGACGACTTTATATATCGCATAAATTGCTTGACTTCACAATGTTTAAATGGCAATTTTAGGTTGT  
TATATCAGTTTGCCAATTTGCTGTTTACCGGACCAGCTTTGACATTTTGGAGATATCACCGTACGACTGA  
CCAAACAGGCTGGTTCAATTTGTGCACATGCTTGCGAGAAAGATATAAAGACCACAGATCAGACGAAGAC  
ATAAAAGACATGGTTAGAAGACGCAAACAACGAGGGTCCGAAAGCTTTGATGAATTTTATAGATACGATTC  
TTGCCTTGTGAGATGCGTTACGGGAACCAATGTCAGACTCAGAGTTAGTGATCAATGTCAAGCGCAACCT  
AAAACCAGAATTGAGACACGAACTACTTCATGTAAATACTCCGAGTCTTGCGACATTACGCAAAGAATGT  
CACAAGCATGAAGCGTTCTATTTCGAATTACCTTTCCAAGCCAATTTCTCGACCAATTAACCACAACGAGT  
AGTCAACGAGGTAGTCCATGAAGATACCACAATGACGGATCTTACGCAGAATCTGGTAGAAACTGGGGA  
CTTAAATGCTATACATTCTCCGGATAAATTGATTTGCTGGAAGTGCAGAGGAAAAGGGACACAGATATCAA  
GAATGTTTAAAAGCGCGTCGTGTATTTTGTACGGCTGTGGTGCCGTTGACACTTACAAACCCACTTGTAG  
AAAGTGTAACCCTGTTTCGGAAAACCTCTCCGGAGGACTTTTCGTGCTCTCTTAAACGCGAATGTCCGTCGTC  
AATAGCCTCGGATCCAGACTTTAATAAAGATACCTTAACACCTGATTCGACCTTCACACCAGACTTATCAA  
AACCGTGTGAGACAAAACCTTAAACCTTACCACGTCCGTTTACACGAATATTTAGACCGTAGAGCAACTATT  
TTCGCTTCAGAACCCAAAGTTGAATTTAAGCCTCGTTTCGTGAGAGAGACTAAGAAACCTATGGACTCAGC  
GACGCTCGCTAAATAAGCATCGTATTTTCAGCGATTGATCATCGATCAAACGATGTGCGACCGTTACAGAA  
TTTAGAAATATTCAATCAGCATTACTTAGCCTTGTAGATAGTGGGGCTACGAAAAGCGTGATTGGAGGG  
AGCTTAGCGAATAAAATTCTCGATTCGAAAATTGACTTTAACAAAATAAAAGGCGATGTGAGAACCGCCG  
ACGGACAAAACAACATGTTGTAGGTTCCATTTCAATTCCTATCGTTTATAACTCCATTGCAAATAATTTTC  
GAATTCCTAATTGTCCCGTCTATCAAGGAAAACGTTCTCTGTGGAATAGATTTCTGGAGAGCGTTTGGCAT  
TTCAGTACATCATTTCGAATACATTGAACTCAGTGGATTTTCGAAGAAGTGGAGTCGAATCAGTTGTGCTTAA  
CACTAGCCCCAAAAGAAACGCTTACAATCAGTAATCACTTCCTTTCTTCGTTTGAATTTGATGGTCTAGGA  
AAGACTACTCTTGTAGAACATATCATCGATACTGGGGACGCCAAGCCCATAAAACAGAGGTTTTATCCGT  
TATCACCAGCAAGGGAAAAAATTGTTGTGCGAAGAAGTAGATAGGATGATCAAGCTTGGAGTCATTGAAG  
AAGCTCCATATTCCGCATGGTCATCTCCCGCGATATTGATTGTTAAGCCTGGAAAAGTCAGATTTTGTTTA  
GACTGCCGCAAGGTAAATGAAGTGACCAGTAAGGATGCTTATCCTATACCAAATTTAGATGGCTTGATAA  
GTAGACTTCCTCCTGTACATTGTGTGTCGAAAATCGATTTAAAAGATGCCTTTTGGCAAATCTGCTTGGAT  
GAATCATCGCGGGCAAAAACCGCATTCACTATCCCGAACAGGCCGCTATATCAATTTAAGCGGATGCCAT  
TCGGATTGTGCAATGCACCGCAGACCATGAGCCGATTGATGGATCAAGTAATTCCTTACGACATGAAAGG  
TCATGTTATGGTTTATTTGGATGATTTACTTGTATTATCGCAAAGTTTTGATGAACATTTAATTCATTTGGC  
TGAGATCGCAACACGATTGCGTAGGGCAGGTTTGACCATTAATATCCGTAAAAGTAATTTTGTCTAACAA  
AAGTCGAATATCTTGGTTACATCGTAGGTGAAGGCACCTTGCAGCCTAATCCGGCTAAAGTTCAAGCAGT  
TGCAGATTTTCCAGTGCCGTCAACAAAAAGACAGCTGAGACGATTCTAGGAATGACCGGTTGGTATCAA  
CGGTTTATCCCTCAGTATTCGTGATTATCTTTACCTAACAGAATTGCTAAAGGGCACGTCATTTGCTTGG  
AATGATAATGCTCAAATTTGTTTGAAGAAATCAAAGAAAATTATCCTCAGCACCGTTCTTGATAAACG  
CAAATATGAGAAGCCGTTTATAGTCCAATGCGACGCTTCATGCATGGCGTGGGCGGTCTGTTAGCCCA  
ATGTGATGAGTCAGGAATCGAGCGACCCATCGCATAATGTGCAAAAAACTAAATAAAGCGCAGCGAAA  
TTATTCCGTTACGGAACTCGAATGTCTTGCCGTTGTATTGGCTGTAAGAAAATTTTCGCATGTACATCGAAG  
GACACGATTTTAAAGTCGTGACTGATCATGCAAGTTTACGTTGGCTAATGAACCAAAAAGATCTAAGTGG  
TAGACTAGCTAGATGGTCATTCAAATTGCAAGGATATAATTTTTCTATCGAACATCGCAAGGGTAGTGAG  
AATGTGGTTCGCAGACACGCTTTCCCGTGCCTTTGAGCCAGCAGACGAAGTAGCTGCGGTGGACCTAGAGG  
TATACCCTGAAATCGACTTGTCTTCGGAGGCATTTTCGATCCAACGAATACTGCCGGCTAAAAAATAATATT  
ATTCGTTCCAACCTTGCCAGATTTTCGAGTNGTAGATGATTATATATATTTCCGAAATGAACCCTCAGCTAG  
TAGTGTAGATGAGAACATGGAGGGTTGGAAATTATTTGTGCCATCTGAATTACGCTTAAATGTTATGAAA  
GCAGCACATGATCAACCAACATCCGCGCATTGTGGGATGGCCAAATGTTTGGAAATGTATTTCGCAGACATT  
TGTACTGGCCGAACATGGTGGTTGACGTACGCGAGTACATACGCCACTGCGAGTTCTGTCAAACGTCGAA  
AGTTCCTAATCGATGCCTCAAACCAACCATGGGAAACCAAGTGTCAGCGAAAGGCCTTTCCAAAGGTTA

TATGTCGACTTTGTTGGTCCGTACCCACCATCAAAAAAACGAAACATTGGTATATTCGTCATTCTGGATCA  
CTACTCAAAGTTCACATTTCTCAAGCCCATAAAAAAGGCTCAATGCCAAAGTAGTGGTAGATATACTGCAA  
GAAGATATTTTTGACTGTTTTGGAGTACCCGAGATAATAGTGAGTGACAATGGCACTCAATTTAAAAAGC  
CTGGAATTCCTCACTCTTGTCGAAGTACGGCATACAGCATATGTGTACCGGTGTATACTCGCCACAGGC  
AAACGCGGTGGAAAGAGTTAATCGTTCGATTAATGCTGCTTTGCGCACATATATTCGGTCCGACCAAAGC  
CTATGGGATGTATACATTAGCAGTATAAATAGTTCGTTACGAAACACCATAACCAATCTATTGGGATTTT  
TCCATACTTCGTTGTGTTTGGGCAAAATATGATTAAGCACGGCAATGATTACAAGTTGCTCAAAAGCCTGA  
ACATGCTGAATGAAGGGCAATTA AAACTCGATCGAGCAGACGAATTTCCCTTAATACGTTCTAATATTCA  
AAACACATGGATAAGGCATATGAAAAGAATTTGCGAACGTATAACTTACGCACACGCCCTCGTTCTTTTG  
AAGTCGGTCAAATAGTAATAAAACGCAACTTCGTTTTAAGCAATTTGGCTAAGCATTTC AACGCAAACT  
TGCACCAGTTGGA ACTAAGGCACGTATCAAACGAAAATTGGTAATTGTATATATTTGTTAGAAGACCTCA  
AGGGAAAAGAACTTGGTCATTACCATGTCTAAAGACATTTGGGAATGTAAGTAATCACCCCTTTTTCAGCTT  
TTATCTCAGTATTAGTTAATCCTTTCGATTAAACCTGCGTTGTGATGGGGTGATGAGTTTTATTTCTGTAAA  
CATAAACATACATTGCCATTGGCATGATCAGCTGATCGCAATCAACTTCAATGGGCAGCACTGCACCATA  
ACATTTATGCAATTACATATGATCAGCGGAGGTTAATAACATAACCAGAGTGACCATGACCTATGTTAAT  
GACGCCGTTGCGAATGAAAATATCGTGTCTTGGGTGAATGCTTAATTGCCTCTTTTAGTTTTGGCGNGGCG  
TCATTCTTTTCCATTTTAATCGCCAACGAGTACAGTCGGTTTAGATTGCTTTAAAAAATTATAAAATTCAATT  
TTTCACGTGGGCGTAATAAACCCACGTGTATCGGCACTCAAGCTCGGAAAAAAAAAAAAAAAAATAANTAATA  
AAAGGGAAGGAAAAAGGTCCAAGGTCCCCGGAAAGAAAGGGTAATATAGACATCATGCGCTCCCGAGA  
GCTTGGCTATAACATTTACCCGGAATAAAGAAAATTTTCAGAAATTCGGACACTGACAAATCTTCACTAAG  
GGATCGTTACTGGAGTCGTGGGGTGCCCTTTCCTGTGTGTGGTAGTCGTAGGAAGGTGCAGGCTAAAGCGC  
GGGGCTGCGTTATTGCGTGCCAAAAGAAAAATTACGCATAACGCGTAGTCCTTATCGGAGCCAAAGCCAA  
GGCCCCAAAGCACCAAAAAGCGACAATCTACACTGGTAGCAGGGAGCGAATTTCCCTTAAGGGCGGACCA  
AGATTTTCAGCATCGTCTCATTTTTCTGCAGATAAGCTTTGAACCTCGCTAACCAATAGTTCGTGCTGCACGC  
ACAGGCAGACCAACGTGACCACGTGTTGACCCATTGATTCCCGGACATTCTTGAGCGCAGATCTGGTG  
ATAGCTAACCAAGTGCGCACCCCTCACTCGGATTTACAACATCTGATATAATTGTTAAACGGCATACTGGCCG  
TAGGTATAAGCGAAGGGCATAAGTACACATGAAATTTAAATTGCAATTCTTTCCGTTTTATATCGCTGACA  
TTGTCTTTTCGATCCTGATTTAGCATGTATATGTGCTGACTACTATATTTCTACGTTACACAGTTCAAATTA  
AGAGCCCACAGCACATCATCGTCGTCAACAGGCCTGCTGACATCGTTGGATCATACTAAAGTAGTGAGTA  
CTGTGTGAAAGAACAAAAGATAATAAGCCAACATATCGAATTGTACGTATTGTTTGAATCGCGGTTATAG  
TCAGCGGGTGTACTCCTAATCAGCCTTCGTAATTACAAATAACTTTTGTGGATCATT CAGATCAGCAGTGA  
TTTAACTTCATATTAGTTTCGAAGTGTAATCTCATT CATGTGTGTTTTTGCCAGATTGAGTTTAGTTTTAT  
AAAAAAAAAAAAAGAAAAACGTTGTTCTTCTCACGTAATGTATAATGAAGTACGATCATGAGTTTAAATCT  
TCTTTGAATACACTTATATGATAAAATGAAATCTTAATTCCTTTTTTGGGCACCTTAGGTAATAGTATCGC  
ATACATAAGGGTAGTTGCAACGACAATCGCAGATGCAGCTACAGGCAGGGTGGGTGAAGACCGAGGGTA  
GCCAACATCTTAGCTCCTCGGCTCTATATGATATAATTCTGCTTG CAGATCGTAGTCGCTCCTTATATATCGT  
GGTATTCCGTCTTACCTTAACTCTGTCTACCTTTTTTTTTCTTTATTATACTTGACGCGTCGAGTGTGTTAGGG  
AGCAAAAGAACCCACGCCACTTCCCTGAGCACGGTCGGAACCCGTAGACGGAGTACGCTCCCAATGCACA  
ACACGAGTGTTAGGCAAGACGCGCCAGCGTAGCCGTCGTGTTTCGTTACA

>9\_rnd-1\_family-230\_\_LTR\_\_Gypsy

GCTGCAGAGGCAGACTTCTAATGGCTACGGAAGCGGCACGGCGGGAACGTGCAAGAGAAAGGACGGAGT  
AGGAGCGATGACCAGAATCCACACGGACATAGAAGGCCAGGAGCGATCGCCGGAATCGAGCGGCCATGG  
AGTTCTGTCTGGAGTCGAAAGTGGTNCCAGGATGGGGCGANAACGGCATCGAAGAGGCGGANTGGCCAG  
CGGGTCTGGACCCAGAACTGAGGGAGTTCTTGGAGTCAGAGCTGGCTCTCTTCGAGGGGGCTGCAGGGAAT  
CTCGCACATCGCGGAGCACCGAATCCGGCTGAGGGATGACAAGCCGTTGAAACAAAGGTACCACCCCGA  
GAATCCGGCCATGCAGAGGGTGATCGACGAGCAAGTGATGAGTTGATCCGGGCAAATGCCATCGAGCC  
GTCGCGTAGTCCGCACAGCGCCCCGATCGTCTTGGTCAAGAAGAAGACTGGCGAGTGGCGTATGTGCATT  
GACTACCGACA ACTCAACGCGCATTCATTCCGGACGCTTATCCGGTGCCTCGTATTAACCACATCCTGGA  
GCGGTTGCGCCACGCCCGGTT CATCTCCACTCTGGATTTGAAGCACGGGTACTGGCAGATACCGATGGCA  
GCCGATAGCCGGGAGTGTACGGCGTTACAGTCCCTGGAAGAGGTCTTTCCAATGGCGGGTGATGCCATT  
CGGCTTACACTCGGCGTGCGCGACATTCCAGCGCGCTTTGGATACGGTAATAGGGCCGCAGATGGAGCCT  
CATGCGTTTCGTTACCTAGACGACATCGTGGTAATAGGAGCGACGAAAACACAGCATGTAGAGAATTTGA  
GGGAGGTATTCCGCCGGCTAAGGGCGGCCAATCTCCGGTTAAATAGGAAAAATGCAGCTTCTTCCGGGAG  
AGGTTAGTCTACCTAGGACATGTAATTTGCGGAGAAGGGATACGGACCGATCCGGAGAAAGTGAGGGCG

ATACGAAACCTGAGGGCCCCAACAAATTGCAAAGAACTGCGACAGTGTCTCGGGATGGCGTCATGGTACA  
GGCGTTTCGTACCCAATTTTCGCGACCCAGGTACAGCCACTCACAGCGCTCTTAAAGAAGGGGGCAGAAATG  
GGCATGGGAGCAAGAACAGGAGGAGGCATTGCGTCAATTGAAGGAGAGCTTGACGACTGCCCCCTGTGTT  
GGCTTGCCCCGACTTTTCCGCCAAGTTCGTCTTGACAGACTGACGCGAGTGAGTATGGCCTCGGTGCAGTGC  
TGACGCAGACGATCGATGGACAAGAGCGGGTGATAGCATAACGCGAGCCGAAAGTTGCTGAAGGCCGAGG  
TAACTATTCCGCCACTGAGAAAGAGTGCCTGGCAATCGTGTGGTCGATCCGGAAGTTGCGTTGCTACCT  
AGAAGGGTACCGATTTCGACGTAATAACGGACCATCTAGCGCTCAAGTGGCTGAATTCGATCGAGAGCCCCG  
TCAGGAAGGATTGCGCGATGGGCATTGGAAGTGCAGCAATTCCAATTTGACGTTTATTATCGTCGAGGGA  
AGCTCAACGTCGTGGCCGATGCCCTGTCGAGGCATCCTCTAGAGACCTGTCAACAAGCAGTGGTGGCCGA  
GGCCCCCTGCAAATGGGTTCGCGAGGATGCGTGTTAGAATCGCCGAAGAGCCAGCCAAGTTCCCGGATTACA  
CCGAGGAAAACGGACAGCTATATAGGCATTTGGGTACCCGGATAGACGATGAGGACTACATCCCTTGGA  
ACTATGCGTAGGCAGTGGTCAACGCCAGAGGGTACTGCGGGAATGTCGCGATGCTCCACGGCCGGACAT  
CAAGGTGTCAGAAAAACGGTGGCGAGGTTAGCCCAGCGGTACTACTGGCCGGGTATGTTCCGCGATGCCG  
CCAGATACGTGAAATGTTGCGAAGACTGCCAAAAATTCAAGAGTGAGCAACTCAAACCGGCTGGTCGCAT  
GCTGACGAGGCAGGTGGCAGAGCCGATGGCGGTACTTTGCGCGGACTTCGTCGGACCCCTTCCACGGTCG  
AAACATGGAAACACGATGCTATTGGTGTTCATGACGCTTTCTCGAAATGGGTGGAGTTGGTCCCTCTCAG  
AAGAGCCACGGCAGCACACCTGCAAAGTGCCTTCGAGAGAGGATTCTGAGTAGGTTTCGGGGTACCTAGA  
AAGTTTGTGTGCGACAACGGGGTACAATTTACGAGTCGGAGCTTCAAGTCATTTTTGGGGTCCCTGGGTGT  
AGAGATCCAGTATACCGCCCCGTACTGTCCGCAAGAGAATCCCACTGAGAGGACTAACCGGACTGTAAAG  
ACCATGATAGCGCAATTTATTGAGGGCCACCAGAGTTCATGGGATGAACTCTTGCCCCGAGATCTCGCTGG  
CGGTCAACACGAGCGTGGCAGATTCAACGGGCTTTAGTCCCGCTTTCCTGATGCAGGGCAGGGAACCTCG  
GTTACCCGCAGCTCTGTACGATCAGGTAAGTCCGGGGTCCGCAACTAGTGCGCTCGACCCTAGGACAAAG  
GCGGATAGGCTAAAAAGAAATTTTTGATATCGTCCACAGCAACCTCCAGCGCGCATCAAAGGACCAGGGC  
AGGCATTACAAGTTCGCGGAGACGAGAGTGGCGGCCCTCGTTGGACTCGATGGTCTGTTGAGGCAGCACC  
AGTTGTCCAACGCTGCCGAAGGTTTCGCCGCAAAGTTGGCACCCAAATTTGACGGCCCCCTACAAAGTCGT  
CAAATTCATATCCCCCAATATTGTGCGGCTGGTGAAATCAGACGACCGCAAGAAGAGGGTGGCCAACATC  
TCACAATTGAAACCATTCTACAGAAAGACGACGAGCGACGAAGAAGACGAAGATCCAGGGCACGCAAT  
GCCACGAGTAAGCGAAGGATGAGAGCAACACCCGTCGCCCAACGAACTATTATGATTAAGCTTAGATA  
AACTAACATTAACAACATAATTCAGAATAGGCATAGTAAAGTGTGAGCCGCACTGAGAGAATAGGGCA  
TTAACAATAAGTAAGAGTAAGTTAACCAATAAGCTGAAGTTTCAGATGGAACCCGAAGTTATCGACAT  
ATCGTCAGACGAAGACAACAGCAGCGGGGACACCGAGCCTTTCCCCGGGGCCGGGAGCCGCAGGCCGTCC  
GCGCGACCCACGCCAGGGGGCGTGAGTACTATCGAAGAGAACGGCAAGAAGGACCGCCTCGCCAGTTCCG  
CCATACACTACTCCCCCGGCGGACCGGCATAANGGAGAGGCTAGACGGGATGGTCTTGCTGATGGCAGTC  
GAGGTCACGACAATGTTTCGTGGAGGCACCGTTCGCCCGGAACTCGCCACCGTACGCGGAAGAGCCCGCAT  
CTCCGCCCCCTCGCATCCCACTCGGCACAATCATCAGAGCCGGCAACCCCAACCGCGGCCGGCGAGATGGA  
CGAGGAAGAGTCCGCACCGTTCGGAACGGAGGAGCACACACCACCAGCGCAGGACGTGGAGGCGGTAGG  
AGAAGAGATATCCCCGTGCGCCGGAGACGCGGAGTCGCCACCGACGGAGGTGCCGAACGGCATCCGCGC  
AAACGACGGGGAAGCAGACCCGCTGAGCCTCGACCCAGAACCCTTAGTGGGAGGGGACCCGTCAACGGA  
GGACGAGCCGGAATTCGTCGCCGCTTTGCCACCCACCGTCTGGAGGTAGACCCGGGCAGCCAGTTTCCC  
AGGATAACGCTGCGGTACCTACCAAAAGTCCCCGCGGTAGCCAACAAACCCCGTCTGAACCCCGCAAAGC  
GCGAATGGGGGTGCCGAAGAAGGCCCCCGCGGAAGCGCCGACGCAGCCGCCATCGTCGACGGAGAGCC  
GCCAGGGCGAGCGTCGCCGGAGTGGAGGCCATCGCCGACCCAGTCCCGAGGGAGCATCCTCGTCGGCCA  
CGAAGAGGCTTCGCGCGGAGACCGAGAAGCCCGAAGGATCGCAGCGGTGCGTGCCGCGTTCGCCCCGCG  
AGCGCCAGGAGGGTCTCCCCAGCTCGGGAAGGATAACCGCCGCTGCNAGATCGCTTCTCGAGGAGGGC  
ATCCCGAACCTGGCCGATACCGATTGCGGTCTGCCAGATGGTTCGTGGAGGAGCACAATCTCAGCACCAA  
GGACGCGGCGAACTCGGCCGTTTCCCCAACCCGCGCCGAGGCGCCAGACGAAACCTTTCTTAAGGAATCG  
GAGGAGGAGTGGCTCGACGACGAGGACGAGATGCCCGCGCTCGTGCCTATTGCCCGCGCCGAGACACCC  
GACACCATCGCCCGGCGGGAGTTAGAAGACGCCTGGTTTCGGCCAAGAAGGCAAGGCGCCATCCCGAAAA  
GGTTCCTTCACGGTTCGCCAGGAAGGCCGGGATGAAGTCTGGTCCGAGGAAGAGGACGCGGTGGTGACG  
GCTTCGTCACCCAAGCTTTTCGAGTCCAACCCAGGATTCTCCCCATGGCTCTAAAGACTCCCACGGAGAGC  
GAGTTGTGGGACGACATAGTGGACCTTTTCGACGGCATCGACGGGTGGGACACTAGCCTGGACTCAGTGC  
TGAGAGGAGGAACCCGACACCGAGGTCGACACGGTCGCCCGCAGTGCCGACGTGAGGGTCACACCGGAGA  
GCCACCCCAAGAAACCCGACACCGAGGTCGAGGCGATCGCCACAGTGCTGACGTTGGGGTAAAACCGG  
AGGGCCCCGTCGAGGAACCCGTGCCGATTCCACCCCTCAGGCTGGAAGGTGTTTCCTCTTGGAACACC

GTTGTCGTCGGGCGTGTTGGACCTAATCGCCAGAGAGGGCGCGAATCCGCCGCTTCCGGTGCCGACGTACT  
CGGTTCCACGTGTCCGACGGGGAGAGCGAGTACAGCGTTACGCTGAACGCGAAAGGCGACGTGACCGTC  
ACCTGTCCGAAGTGGGGGGGGTGTGAGGCGGCTAATGAGACCAGCCACCCACAGTTTTTCACGGCAAGG  
AGCCGTCATCCCTTTGGCCAAATTACGGCAAGGAGCCGCTGGCGGGACAACGCATTAATTTTCTTTAGTTA  
TAAGTATTAATTATATTAGGTTAAGATCTTAGTGAAATAAGAGGCAAGGAGCCATCAGTAATATAAGCAG  
TTCGATTAGTAGCAAAGAGGCAAGGAGCCGCGAATATTATAATTGATTTAAATAGTGAGTTTGAATTTAA  
CCGCCGGCCGCGCTGCAACCGTGC GTTGTGATCGGTTGCTCAACACCGTCTTTGAGAGCGCAACTTCAA  
TTCGGCGGCGAAGAGCGAAAGCTCCGAGGCGAAGTTGCGAAAGCTCGCGGCGAAGTTGAGCAGCCGAAG  
CGAGCGCATGGCTTGCCGGCGAGCGTGCCGGCACTTGTGATCGAACGTTAAGGGTGAGTAGAAGTGCTGC  
GCGAGATAAACGAAATCATAGATGGTATAGTGAGCGCTAGGGCTCCAGAAAACAGTGCGGCAGGGTTT  
AGCTTAGGATTTACGATAAGGTTCGAATGAATAATAGTGAATAAAGTGCCAACGTTGTAATTATCTAGAA  
AGTATTGGATTATTCCTGTTCCTGGTAACCCGGCTTACCTTAACATCGGAACTAACC GGTTGTTTCGACCT  
AACCTCGAACGAGGGGCATGCGGTACGAGATTGTGGCTCCGGGGTGGGCATTGCCGGTTGGTGTTTAGGT  
AGTGGAGTTGGTGCGAGGCCACGGCCCCGCTAGTGTAGTTGGTGCGAGGCCACGGCCCCGCTAGCATAGTG  
TACGAGGCCACGGCCCCGGCAGAAAGATAGAGCGNTTAGGTAGTGAGTTGGTGCGAGGCCACGGCCCCG  
TAGTGTAGTTGGTGCGAGGCCACGGCCCCGCTAGCATAGTGGTACGAGGCCACGGCCCCGGCAGAGAGATA  
GGGTGTTTAGGTAGTGAGTTGGTGCGAGGCCACGGCCCCGCTAGTGTGGTTGGAGCGAGGCCACGGCCCCG  
CTAGCATAGATGGTACGAGGCCACGGCCCCGATGGTGTAGGTGTGTAGAGGTAGATCTGGGTTTGGTTTGG  
TCAGGATACTACCCCCCTTAAGCCCTCTCTCCAGCGAAATTATAAAATAACTTGTAACCTCGCTAGACCTGG  
TAAGACTGAGAATTATACCCCGGCCAGAAGCTTCCTTACAAGTGGCGCCCCGAGCAGGGACCAGAGGCGTT  
TAGGGGTGTGGCATGTCGGCGGATTAAAGCCCGCAAGCATGCCCGAATAGGTATTTTCCAAAAATATATA  
TAGGGTATTTCTAGTCGGGTATACCTAGAGGGAAGGTAACCTAGCAGAGAGCAAGAAAATGAGAAGGT  
CATGTATGTGCGAAATATGAAAATAGGGTATTAAGTAGTCCGGTATACCCAGAGAACATTCCTATACCT  
TGTGTTAGGCATAGCCAGAAAATGAACACGTGCAGCTGGTGAGTGACAAAAATGCTAGCAGCAAGCCGG  
CAAGTAAGATAAAGAGACGAAAACATAACGGTTCGGTTCGTGAGAGTACAGCGCGCGCGCCAGCCGGGC  
GACGTCGAGACCACGCTCGCACACGGGTGCCACACGCGCGGCGCAGTCGACGTCGGCGTCGAAGGACC  
GTTAAGGCGTCGCGGCAGCGGTTGTACAGTGGGGCGAATCCAACCTACGCGCGGTGAAAAGTTGAATTCG  
CGAGTACAGCTGTCGGGGCAGTGAAGTGGTCACCCTTCAAGTGAATGTGAACAAAGGGAACAATAAGAG  
CGGAACAAGTGCCAAATAAAAAAATAAGTGGATAATAATAAAATTTTTTTTTTTATAAATAAAATTAATT  
AAACAAAAAATAAATAAATAAATAAGTGGATAATAATAAAATTTTTCTTTTATAAATAAAATTAATTA  
CAAAAAAATAAATAAATAAATAAGTGAATAATAATAAAATTTTTCTTTTAANAANAANAATTAATTAAC  
AAAAAATAAATAAATAAATAAGTGGATAATAATAAAATTAATAAATAAACCAGGTTTACAATAAAGA  
TAAAGGCAGCGACCACATAAGGAACAGCCTAAAAAGCGGAAAAAGTGAGAAAAAGAAAATTTTTGAAATA  
CCTTTTGTGAGTTTTTTTAAAAAAGGGGGTAAATACTTTTGTGGAATATTGTTTTGTATTTTTGTTTGGTG  
AAAGATATAAAGACAAAAAAGAAAAAANTAAGAAGAAAACTAAAAAGGAACCAAGTGGCTGA  
GCAAGATCGGCGTAAAAGTGAAAAAGACACCAACACCAAGAAAAGGAGAGAGGAATAGTAAAGGGACC  
GACGGAACCCCTAGAACGGGAAGAGAGGGAAACAGCGACGTCGACTAGCAAGGAAGTATACAATAAAG  
GATGGAGGCAGGTGAGTGCCAAAACCCGGGGTAGGCGTCCGCTGGATTACACGCGACGCAAAGAGGAG  
TTAGTGGCGATCGCCAGGAGTTTGGGCTGGAAAAGGAGGGGCGCGTGAGAGGAGCTACGTAAGCGGCTG  
TCCACCTACGTGCAGGAGGGCGGTTCATGGTCGGCTCGCCGAGCTGGAATCCAGTATGCTAAAACCTTTG  
AGCCGCCATCTTGGGGCGTCCCACCCGACTTTGGTGAGCGGCCACGGCAAAGTCGGAACCTGACCTCAG  
AAGCTCCCAGCTGTACGGGCTTTTGCAGGCGCCACCCCGAGTTTGACCGTCTCGGGCGTGAGGCGAGTT  
CCTGCTCTCGGTGGAAATGAAGACCGCCGAGCAACTGCGGTCAACGCAGAGGTGGGGAGGTCCCCTGTTG  
AACCGGGTGGTGGTCCCTGCTACACTAGGCCGCACCATCCATCGGAGGCGAGGCCACTTCCCAATGTCCC  
GGAGCAAGCTCGGAAGTGGGGTATGAGGTACGATGGACGCTCCGACCCCTTGGGTCTTAGAGGACCTC  
GAGGAGCGCGCTATCCTATGGTATAGCCCTCGACCGTATGCCAGGGCAATGAGCGAGGTATTCTGCG  
ATAGGGCTGCTCGTTGGTTTCTGAGCAGTGGGCTAAGGGATGTGCCGTGGGCCGTGTTTAGGAGGGATT  
CTTGGAGTTTTTCTTGCCCCCTCGTTACTTCGAGAGGCTTGAGGACGAGATCCGATCCCGGAGGCAGCGCG  
TAGGTGAAGCGTTCAAGGAATATTTGATAGAGCTGAGGGCTCTTATGCACCACGCTAGATACGAGCCGGC  
ACAAGAGCTGCATCGGATCTACGAGAACGCCGCTCCGGAATACAGGCTCTATGTGCGACGGCAAGACTTT  
TCTACCCTATCCCAGCTAACTCAACTGGCCGTAGAATACGAGACCGTCGTGAGGCAGAGGGCGGAGTACT  
CAGGCAGCCAACCCTTGGGTGAGGGTGTCTCTAGTTCAAATAGTGCAGAGTGGGCGAGGACGGCGCAGTC  
CTCGGGACATCTCAATCCGTTCCGGTCTGCTCCCAGCGGATCCGGGACGACCGTTGTGGACAACAGGGTC  
TCCACCCACCCGCTGCAACTCACGCAGAGGTGGCCCATCAGATGATGAGCCAAGAGGCCGGGAACGGA

TATGATCCGCGACGGGCGTGTCTAGGTGCGCACAGGAGGGGCATTTTGCCAGGGAATGTCCCAACGCCC  
CTGTCTTATTTTGTGGGTATGTGGAAGCCGGGGCCGAAGTAGTCGGGAGTGTTGCCGCCGCGCGGAGAC  
GGGAAACGGGCAACGGCGTCTCGGACCAGGATCGGGTCGGCGCCAATACACACGGAACGCAGCAATA  
GGACACCCACTGAAGGTGGACGGTGGCCGGATCGTCTGCTACGGTAGAGATTGGCGGACGAACGATGCCC  
GCCACGATCGATACCGGAGCCACTCGTAGCTTCATGAGTGAGGACTGCGTACGCAAATGGACGATCCGGG  
GAAGAGCGGAGGAAATACAGGCACGTATCCGCCTGGCAGATGGGTCCACCCTAGAGGTAGAAAAGGCTT  
CGAGAGTAGACGCCAGCTTAGGGGGGAAAAACGATCAGCATGACGATGCTCATCATGCCCTCAATGCTGG  
ACCATGTAATCCTGGGTATGGATTTTTTTGGGGGCGATGAATACCACAATACGCTGCGGCGAGGCGGAACT  
GGTCCTAGAAGCAGCGACGACACCGGGGCGTGAGGCCAGGAACGAGCGAGGAGTCGGAGGAAGGCCGCC  
CAAGGCATGAAAAGGGAGCACCTGCTCGGCTACAGAGGGAGCCGGAGGAAGGCCTCCCAAGGCATGGAA  
AGGGAGCACCTGCTCGGCTACAGAGGGAGCCGGAGGAAGGCCTCCCAAGTCATGATGGGGGGCACCTGC  
TCGGCTACAGAGGGAGCCGGAGGNAGNCCTCCCAAGTCATGAGAAGGGAGCACCTGCTCGGC

>Ref\_dvir\_611

AATCCGGGCAGGGAGCTTGATTGTCCTCGTAGGTGGCTCTTTGCAGGCCTTAGCAAACTAATGTTTGCAT  
TCACTTTGCTGCAGTTTAGTGGTAGTCCATCTCTTGGAGCTGTCTGTCTGTTTGCCGTTAAGAGGCTCTTTG  
CCTTCTTATAAGCTGGGCATCCTTTGTATGAGGCCACATGGGGACCCTGGCAGTGCAGGCAGAAGGCCGG  
GTCACTGCTCTTCTTTGAGCATTCCGACGTGGAGTGTCCGCCTCCACATTTACACATCTATGTTCCAGGTG  
ACAGTATCTTTGAGTGTGTCCGTATCCTTGGCAGCGATAGCATTGGGGGACATCGTTAAACTTCAGTGGAG  
GCTCGACTGTAACCACAGAGCAGCAAAGCCTTTTGATTTTGTATGCGTCTTTGTTATTTTTCGCCGGCTCGA  
GATTTACGAAGAATATGTTTAGGGGTTTTTTTGTGCTTTTTTGTGTGAGGTTATAAAGGTCTCTTACTTCGT  
GCCCCGTAGTTGCTTAAACCTTCCTTGATCTCGACCAGCTCAGTAGAGTGGTGCAGGCCTTTGACCACTATC  
CGGTAGGCTCTTTCGTCTCTGGGCTGAAAGGTCTGATACCGTTTGTGTTTTCATTGAGAAATGCCTTAAGT  
GCAGTGAAGCTAGCTTTATCTGGCGTCATTACTCTAATGTTGTTGTTTTTAGTGGCTTTATATGTAAATTCT  
ACTGCTTTGCCAAGGGCGCCAGTTATGGCATTGGTAAGCGCTTTGATATTGGTCACGTCTGGAATAAAAAT  
TGGTGGTGGCCTGATCGTCTTAGGTTCTTTAAGCAGGCTCCTTATTTGGTTGGCCCTTAGCTAGTCCTATGA  
CTTCAGTGGAGTCATCGCTGGCCGAAGATTCTTCGTCTCTTCATCTGTAGAGAGTGAAGCAAATCTGTTA  
CTTGTTAGATTTTCTCTAGCAGCTTTGCTGGTGCTTGGTCCGTCAGGTAGGTGTACGCGGGAAGGCTGTTT  
GCGCTGTTTGCGAACGGGCTTCCTCCTTATTTCTCCAGGTTCACTGGTGCTTGGTCCGTCAGGTAGGTGTAC  
GCGGGAAGGCTGTTTGCGCTGTTTGCGGACGGGCTTCCTCCTTATTTCTCCAGGTTCACTAGTGCAACTCG  
AATTCTCAGAGTCAGGGTTGCTAGTTCTGATGTTGGTCTTCTTCCTCTTGGTGCTGCTAGTTTTGATGAGCT  
GTGTAGCACGTGGCTCGGCTTGCCAGTCCATCTTGTCATCTGGTTGGTGAGGGGTACGGGGGAGCGGGA  
GCAAACAAGCTGCCCCGTCTGGCGAGCGTAAGCAGCGAGTGCTAGTCTGTGTTATTGTTTGTTTTTGTATTC  
TAATTGTCGTGTGTGTGTTGAAATAACGCGCACAAAGCATGTAAGCGTGTGCGTGTGTAAGTATTAGTGCGC  
CGTTATTTGCGCACGGCACGCAAGCTGAAAGAGCGCAGTAACGGTTGCAGCGACCAATCAGAGCGCAGCT  
GGCCTGAAAATTTGCGCGCAACTAACTGTTGTTTATGTTGCTTGTGTATTTGGAATGCTTCGCAGCGGTCC  
GCAGGCACGTCTTTACTCAACGAGTGTTTCGATCGCGACTAAAAAACCTATTCATGGTGAGCAGTGTGTGCT  
CATCACATTATACGCTGAAAGCGTATAATTTTAAAAGTTTGTGCATATACTCGTTATTTGAGTTAGATATCG  
TTATTTGTTATGTTGTATAACATTTTGGCTTACGATATTAAGAAAAAAGATAATTGTGAAACTTTCAAGC  
CAAGATTGTGTTGTTAGTAATAATTTTATTGTTACTACATCGTGTAACAAATGGGTTTCCTTTTATCGTAA  
AATTTAACAATTGCATCCAGTGGAATTCGATTTCATACAGATGTATGGACGATTAGTACGCTGGAAAAAA  
AGTTTCTAAAATTTTTGTAATTATTTTAAATATTTGTCATAAATGAACTTTAACATTTTACATACTATTTA  
ATATAGTATGTGACTTGTTTTACTTAATATATTTTTATCGCATAATTATGTTTGCAAGTTATGCATACATAA  
TTTATACATATAAATAAATTATCAAGTTTGTGCATCAAAATTAAGTGTTTATTCCGTTATGGTATTAAGCA  
ATGTGTGATAAAATATATATTAAGTAAGTGACATATAAAGATATTTTTGAACGAATTGTATATATTTTCA  
TATAGATATAATATGTGGTGAATCTTAAAAAATGTGAAACGTAAATTAACGAACATGAAATGCTATGTAA  
CAATGGCCATATTCGTTTATATATAACATTAATATCTATAGTATATTTTTTTATTCAAAAATATATTAAGTTG  
TAATGTAAATACATTTTGTAAATATGTATGTATATTTTGTACATACAAATTATAAAAACATTATTCTGGTTG  
ATCCTGCCAGTAGTTATATGCTTGTCTCAAAGATTAAGCCATGCATGTCTAAGTACACACGAATTAACAGT  
GAAACCGCAAAAGGCTCATTATATCAGTTATGGTTCCTTTAGATCGTTAACAGTTACTTGGGATAACTGTG  
GTAATTCTAGAGCTAATACATGCAATTTAAAACACGGACCTTTTGGAACGTGTGCTTTTATTAGGCTAAAA  
CCAAGCGATCGCAAGATCGTTTTATTGGTTGAACTCTAGATAACATGCAGATCGTATGGTCTTGTACCGAC  
GACAGATCTTTCAAATGTCTGCCCTATCAACTTTTGATGGTAGTATCTAGGACTACCATGGTTGCAACGGG  
TAACGGGGAATCAGGGTTCGATTCCGGAGAGGGAGCCTGAGAAACGGCTACCACATCTAAGGAAGGCAG  
CAGGCGCGTAAATTACCCACTCCCAGCTCGGGGAGGTAGTGACGAAAAATAACAATACAGGACTCATATC



CGAGGCCCTGTAATTGGAATGAGTACACTTTAAATCCTTTAACAAGGACCTATTGGGAGGGCAAGTCTG  
GTGCCAGCAGCCGCGGTAATTCCAGCTCCAATAGCGTATATTAAAGTTGTTGCGGGTTAAAAACGTTTCGT  
AGTTGAACTTGTGCTTCATACGGGGTAGTACAACCTTACAATTGTAGTTAGTACTATACCTTTATGTATGTA  
AGCGTATTACCGGTGGAGTTTCTTATATTTAATTAAATACTTGTATTTTTTTATATATTCCTCCTATTTAAA  
AACCTGCATTAGTGCTCTTCATCGAGTGTTATTGTGGGCCCGGTACAATTACTTTGAACAAATTAGAGTGCT  
TAAAGCAGGCTTCAAATGCCTGAATATTCTGTGCATGGGATTAATGAAAATAAGACCTCTGTTTTCTGCTT  
TCATTGGTTTTTCAGATCAAGAGGTAATGATTAATAGAAGCAGTTTGGGGGCATTAGTATTACGACGCGAG  
AGGTGAAATTCTTGACCGTCGTAAGACTAACTTAAGCGAAAGCATTGCGCAAAGATGTTTTTCATTAATCA  
AGAACGAAAGTTAGAGGTTTGAAGGCGATCAGATACCGCCCTAGTTCTAACCATAAACGATGCCAGCTAG  
CAATTGGGTGTAGCTACTTTTTATGGCTCTCTCAGTCGCTTTCCCGGGAAACCAAAGCTTTTGGGCTCCGGG  
GGAAGTATGGTTGCAAAGCTGAAACTTAAAGGAATTGACCGGAAGGGCACCACCAGGAGTGGAGCCTGC  
GGCTTAATTTGACTCAACACGGGAAACTTACCAGGTCCGAACATAAGTGTGTAAGACAGATTGATAGCT  
CTTCTCGAATCTATGGGTGGTGGTGCATGGCCGTTCTTAGTTTCGTGGAGTGATTTTGTCTGGTTAATTCCG  
ATAACGAACGAGACTCAAATATATTAATAGATATCTTCAGGATTATGGTGTGTAAGCTTATATAGCCTTC  
ATTCATAGTGGCAGTAAAATGTTTATTGTGTTTGAATGTGTTTATATAAGTGGAGCCGTACCTGTTGGTTT  
GTCCCATTTATAAGGACACTAGCTTCTTAAAATGGACAAATTGCGTCTAGCAATAATGAGATTGAGCAATA  
ACAGGTCTGTGATGCCCTTAGATGTCCTGGGCTGCACGCGCGCTACAATGAAAGTATCAACGTGTATTTCC  
TAGGACCGAGAGGTCCGGGTAAACCGCTGAACCACTTTCATGCTTGGGATTGTGAACTGAACTGTTTAC  
ATGAACTTGAATTCCAGTAAGTGTGAGTCATTAACCTCGCATTGATTACGTCCCTGCCCTTTGTACACAC  
CGCCCGTCGCTACTACCGATTGAAATTATTTAAGTGAGGTTCTCCGGACGTGATCACTGTGACGCCTTGTG  
TGTGCGGTTGTTTCGCAAAAGTTGACCGAACTTGATTATTTAGAGGAAGTAAAAGTCGTAACAAGGTTTC  
CGTAGGTGAACCTGCGGAAGGATCATTATTGTATAATGTTTCATTTCCGTTAATAAAAAACAATTTTATATAT  
AGAAATATATAAAATTTTTCTGAATATAAATGAATAATCATTTAAAAACATATACACATACTTATTCCCAA  
TTAATATATATTTATATAATATCTGTCAATTTTCAATTTGGGATTGTCTGTGTTTATGCGTTTTAATGATGA  
AAAACCTTGCGTGTATATGTACCATAATATACATGCGTTGCACAGATGTATTGTTTCATTATTATATGCGCAT  
ACATTATATAAACGCAACAACCTAAATTTTATGTGTTGTACCTGTTTTTCAGGTAAATGCTTTGCATATTTCT  
ATAAAAAATATTTAATTCTTCTATCTATATAAAAAATTTTATTCATACCATATTTTTTAAAGTATATGTAAACT  
AAGACATTTTCGCAACACAATTTAGGTATAAACAAATTTTATTGAAGGAATTGATATATGCCAGTAAAATGG  
TGTATTTTAAATTTCTTTCAATAAAAAACATTTGTGACGTAATGAAATAAACCAATATAAATTATCACTCT  
AAGCGGTGGATCACTCGGCTCATGGGTCGATGAAGAACGCAGCAAACCTGTGCGTCATCGTGTGAACTGCA  
GGACACATGAACATCGACATTTTGAACGCATATCGCAGTCCATGCTGTTTTGTACTTTAATTAATTTTATA  
GTGCTGCTTGGACTACATATGGTTGAAGGGTTGTAAGACTTTGCTAACTAAGTTGTTTAAAATTTTTCGAA  
GTTTTAAGCATATGGTATATTATTGGATAGATTATGTGTGTCTCTGATATGCATAAATTATTCATAATATT  
AATATATATATGGATGTACTACTCATTGTATATTTTGTATGAGAAAACCTGAAGAATTATATTTTCTTTTTTC  
AAATCAAATAATACTGAGGAATGTCTAGCATAAAAGAAAAATATATTTTTCCTTAATCTAGAATTGCCTCT  
TATTAATGATGTGTGATAAAAGAATTGTTGTAAAATTTATGGAACCTCAGAACAAAAGTATTATCCATTAT  
ATTGAACAATAAATAATGTTCAATTAACATTGTTTTATACAACCTCAACTCATATGGGACTACCCCTGAA  
TTTAAGCATATTAATTAGGGGAGGAAAAGAACTAACAAGGATTTTCTTTAGTAGCGGCGAGCGAAAAGA  
AATCAGTTCAGCACTAAGTCACTTTGTCTATATGGCAAATGTGAGATGCAGTGTACGGAACATCAACATTC  
TAGTATGAGAAGTTAACGATTTAAGTCCTTCTTAAATGAGGCCATTTACCCATAGAGGGTGCCAGGCCCGT  
ATAACGTTAATGATTACTAGATGGTGTTCCTCAAAGAGTCGTGTTGCTTGATAGTGCAGCACTAAGTGGGGT  
GGTAAACTCCATCTAAACTAAATATAACCATGAGACCGATAGTAAACAAGTACCGTGAGGGGAAAGTTG  
AAAAGAACTCTGAATAGAGAGTTAAATAGTACGTGAAACTGCTTAGAGGTAAAGCCCGATGAACCTGAAT  
ATCCGTTATGGAAAATTCATCATTAGAATTGTAATATTTTAAACAATATTATAAATAAGTGTGCATTTTTT  
CCATATAAGGACATTGTAATCTATTAGCATAAATATTTATCATAAAATTATGTCTGATTGCTTATTTGAATT  
ATATGCTTGGCATTTTAACATAAAATAAAAGATATAAATTTGATAAAGTGCTGATAGATTTATATGATTAC  
AGTGCGTTAATTTTTCTGGGAATTATATAATGGCATAATTATCATTGATATTTGTGTTTATTATATGCATTT  
GTATGATTAACAATGCGAAAGATTTCAGGATACCTTCGGGACCCGTCTTGAAACACGGACCAAGGAGTCTA  
ACATATGTGCAAGTTATTGGGATATAAACCTAATAGCGTAATTAACCTTGACTATTATAATGGGATTAGTTT  
TTTAACTATTTATAGTTAATTAACGCAATCCCGGGGGCGCTCTATATAGTTATGTATAATAATATTTATATT  
ATTTATGCCTCTAACTGGAACGTACCTTGAGCATATATGCTGTGACCCGAAAGATGGTGAACCTATACTTGA  
TCAGGTTGAAGTCAGGGGAAACCCTGATGGAAGACCGAAACAGTTCTGACGTGCAAATCGATTGTCAGAA  
TTGAGTATAGGGGCGAAAGACCAATCGAACCATCTAGTAGCTGGTTCCTTCCGAAGTTTCCCTCAGGATA  
GCTGGTGCATTTAACTGTTGTATAAAATAATCTTATCTGGTAAAGCGAATGATTAGAGGCCTTAGGGTCTGA

AACGATCTTAACCTATTCTCAAACCTTTAAATGGGTAAGAACCTTAACCTTTCTTGATATGAAGTTTAAGGTT  
ATGATATAATGTGCCCAGTGGGCCACTTTTGGTAAGCAGAACTGGCGCTGTGGGATGAACCAAACGTAAT  
GTTACGGTGCCCAAATTAACAACCTCATAACAGAAACCATGAAAGGCGTTGGTTGCTTAAAAACAGCAGGACG  
GTGATCATGGAAGTCGAAATCCGCTAAGGAGTGTGTAACAACCTCACCTGCCGAAGCAACTAGCCCTTAAA  
ATGGATGGCGCTTAAGTTGTATACCTATACATTACCGCTAAAGTAGATGGTTTATATTACTTGTAAATATAA  
ATTTTGAAACTTTAGTGAGTAGGAAGGTACAATGGTGTGCATAGAAGTGTTTGGCGTAAGCCTGCATGGA  
GCCGCTATTGGTACAGATCTTGGTGGTAGTAGCAAATAATCGAATGAGACCTTGGAGGACTGAAGTGGAG  
AAGGGTTTCGTGTGAACAGTGGTTGATCACGAGTTAGTCGGTCCTAAGTTCAAGGCGAAAGCCGAAAATT  
TTCAAGTAAAGAAAAATCTAAATATATTTGTTCATCTAACCGATTTTTATACACTTGAATAATTTTGAACGA  
AAGGGAATACGGGTTCCAATTCCGTAACCTGTTGAGTATCCGTTTGTTATTAAATATGGGCCTCGTGCTCA  
TCCTGGCAACAGGAACGACCATAAAGAAGCCGTCGAGAGGTATCGGAAGAGTTTTCTTTTCTGTTTTATA  
GCCGTAATAACATGGAAGTCTTTCGCAGAGAGATATGGTAGATGGGCTAGAAGAGCATGACATATACTGT  
TGTGTGCGATATTTTCTCCTCGGACCTTGAAAATTTATGGTGGGGACACGCAAACCTTCTCAACAGGCCGTAC  
CAATATCCGCAGCTGGTCTCCAAGGTGAAGAGTCTCTAGTCGATAGAATAATGTAGGTAAGGGAAGTCGG  
GCAAATTAGATCCGTAACCTTCGGGATAAGGATTGGCTCTGAAGATTGAGATAGTCGGGCTTGATTGGGAA  
ACAATAACATGGTTTATGTGCTCGTTCTGGGTAAATAAAGTTTCTATCATTTATGGTAGTTTCTTGTTCCCC  
GGATAAGTTTAGTTACGTAGCCAATTGGTGGAACTTTCTTGCTAAAAATTTTTAAGAATACTAGTTTGGGC  
TACCAAATTAGTTCTTTTAAATTATAACGATTATCAATTAACAATCAATTCAGAACTGGCACGGACTTGGG  
GAATCCGACTGTCTAATTAACAAAGCATTGTGATGGCCCTAGCGGGTGTGACACAATGTGATTTCTGC  
CCAGTGCTCTGAATGTCAAAGTGAAGAAATTCAAGTAAGCGCGGGTCAACGGCGGGGAGTAAGTATGACT  
CTCTTAAGGTAGCCAAATGCCTCGTCATCTAATTAGTGACGCGCATGAATGGATTAATAACGAGATTCCTA  
CTTACTGTCCCTATCTACTCAGTTCGTTTCAGACAGTCGTTGGGAACAGACGTGTTTATTTTCATCGCTCGCT  
TCGCAAACAATTTTAAGATAACGGTGCTTTCAAGCAACGGTATCTTGTTTACATTTTGTGCGCTTATCAGC  
AATAAAGTTTTATTGCTTTGTTTACGTCGTTGCTGCGTGAGCAACAGGCGTTCGTGTGTGTGTGTGAACC  
GCCAGCTTCTACGTGTGTGTGTGTGTGTGCGTGCTATTTATATATTAAATAGATAAGCGCACACCTGCGGA  
CGATGCCGCCACGCAAAAAGAAGCCCGCTGAGAAGGGGGCTTTTGAAAATTGTAGGATGACGTCGGAAG  
ATGAGGTGACCTTGTGCGAGTCGTCATCGAACAGCGAGGTAAAGCGGAGGAGCAAGCAGCGCCTGAGGA  
AGGCAACTTCCGAAAGCGCTGTGAGCTCAGTTGGTGCAGCGTGAGGGGAGCGCTGTCCCGCGGGAGCCGC  
AGATGGCTCGCCCGGAGCAGCGGGTGCAAGTGTGGAGGAGCGGGTTTTTGCCGTTCCCTCATGCCGTGAGC  
GTTTTGGATGTGTCTGAACCTGCCGTGGAGGGGCCGTCGACAAGTGCGGCGGCTTTGAGGAAGCGGAAAG  
GAACAGCTGTGAGCAGATGAAGGGGATAACGGGAGCTTTATTGCAGCTTGCACTCAAGGAGAGAGCCA  
CGGGGTCGCTCATTTGCAAGTTAGTCGATTATACAGGGCAGTATGAGCAGCTCCTGTTTCGCGCTTGTGGCG  
CAGAATGAGCGGCTGCAGGGGCGCTTGAGGGCCGTTTGCGGGGGTGCAAGGCGTTTCGCATGAATTGCATG  
TTCCAGCCGGCCAAGCGCGGGCTCCGTCGGTGAACGCCGCCAGAGGGGGTCCCAGGTCGGCAGTGCCGTC  
TACCCCGGAGATGCCTCGGCCAGTTGAGACATGGTCCTTGGTTGTGCGCAGCAAGGCTGCTGGCAAACC  
GCTAAGGACGTGGTGGAGCAGGTGGTGAAGGAGGTAGGTCCCTCTCTTGGTGTGCGGATAACATGAGGTGA  
AACCTCTAAGGGATGGAGGTGCGTTAATTCGGACTCC

>9\_rnd-1\_family-88\_\_LTR\_\_Gypsy

CGAATCCGGCTGAGGGATGACAAGCCGTTNAAGCAAAGGTACCACCCCGAGAATCCGGCCATGCAGAGG  
GTGATCGACGAGCAAGTGGATGAGTTGATCCGGGCAAATGCCATCGAGCCGTCGCGTAGTCCGCACAGCC  
CCCCGATCGTCTTGGTCAAGAAGAAGACTGGCGAGTGGCGTATGTGCATTGACTACCGACAACCTCAACGC  
GCATTCCATTCCGGACGCTTATCCGGTGCCTCGTATTAACCACATCCTGGAGCGGTTGCGCCACGCCCGGT  
TCATCTCCACTCTGGATTTGAAGCACGGGTACTGGCAGATACCGATGGCAGCCGATAGCCGGGAGTGTAC  
GGCGTTCACAGTCCCTGGAAGAGGTCTTTTCCAATGGCGGGTGATGCCATTCGGCTTACACTCGGCGTGCG  
CGACATTCCAGCGCGCTTTGGATACGGTAATAGGGCCGCAGATGGAGCCTCATGCGTTCGCTTACCTAGA  
CGACATCGTGGNAATAGGAGCGACGAAAACACAGCATGTAGAGAATTTGAGGGAGGTATTCCGCCGGCT  
AAGGGCGGCCAATCTCCGGTTAAATAAAAAAAATGCAGCTTCTTCCGGGAGAGGTTAGTCTACCTAGGAC  
ATGTAATTTGCGGAGAAGGGATACGGACCGATCCGGAGAAAGTGGAGGCGATACGAAACCTGAGGGCCC  
CAACAAATTGCAAAGAAGTGCAGACAGTGTCTCGGGATGGCGTCATGGTACAGGCGTTTCGTACCCAATT  
CGCGACCCAGGTACAGCCACTCACAGCGCTCTTAAAGAAGGGGCAGAAATGGGCATGGGAGCAAGAACA  
GGAGGAGGCATTGCGTCAATTGAAGGAGAGCTTGACGACTGCCCTGTGTTGGCTTGCCCCGACTTTTCCG  
CCAAGTTCGTCTTGACAGACTGACGCGAGTGAGTATGGCCTCGGTGCAGTGCTGACGCAGACGATCGATGG  
ACAAGAGCGGGTGATAGCATACGCGAGCCGAAAGTTGCTGAAGGCCGAGGTAAACTATTCCGCCACTGA  
GAAAGAGTGCTGGCAATCGTGTGGTTCGATCCGGAAGTTGCGTTGCTACCTAGAAGGGTACCGATTTCGAC

GTAATAACGGACCATCTAGCGCTCAAGTGGCTGAATTTCGATCGAGAGCCCGTCAGGAAGGATTGCGCGAT  
GGGCATTGGAAGTGCAGCAATTCCAATTTGACGTTTATTATCGTCGAGGGAAGCTCAACGTCGTGGCCGA  
TGCCCTGTCGAGGCATCCTCTAGAGACCTGTCAACAAGCAGTGGTGGCCGAGGCCCCCTGCAAATGGGTC  
GCGAGGATGCGTGTTAGAATCGCCGAAGAGCCAGCCAAGTTCCCGGATTACACCGAGGAAAACGGACAG  
CTATATAGGCATTTGGGTCACCGGATAGACGATGAGGACTACATCCCTTGGAAGTATGCGTAGGCAGTG  
GTCAACGCCAGAGGGTACTGCGGGAATGTCATGATGCTCCACGGCCGGACATCAAGGTGTCAGAAAAA  
CGGTGGCGAGGTTAGCCAGCGGTACTACTGGCCGGGTATGTTCCGCGATGCCGCCAGATACGTGAAATG  
TTGCGAAGACTGCCAAAAATTCAAGAGTGAGCAACTCAAACCGGCTGGTCGCATGCTGACGAGGCAGGT  
GGCAGAGCCGATGGCGGTACTTTGCGCGGACTTCGTGCGACCCCTTCCACGGTCGAAACATGGAAACACG  
ATGCTATTGGTGTTCCATGACGCTTTCTCGAAATGGGTGGAGTTGGTCCCTCTCAGAAGAGCCACGGCAGC  
ACACCTGCAAAGTGCCTTTTCGAGAGAGGATTCTAAGTAGGTTTCGGGGTACCTAGAAAGTTTGTGTGCGAC  
AACGGGGTACAATTTACGAGTCGGAGCTTCAAGTCATTTTTGGGGTCCCTGGGTGTAGAGATCCAGTATA  
CCGCCCCGTACTGTCCGCAAGAGAATCCCACTGAGAGGACTAACCAGGACTGTAAAGACCATGATAGCGCA  
ATTTATTGAGGGCCACCAGAGTTCATGGGATGAACTCTTGCCCGAGATCTCGCTGGCGGTCAACACGAGC  
GTGGCAGATTCAACGGGCTTTAGTCCCGCTTTCCTGATGCAGGGCAGGGAACCTCGGTTACCCGCAGCTCT  
GTACGATCAGGTAACCTCCGGGGTCCGCAACTAGTGCGCTCGACCCTAGGACAAAGGCGGATAGGCTAAA  
AGAAATTTTTGATATCGTCCACAGCAACCTCCAGCGCGCATCAAAGGACCAGGGCAGGCATTACAACCTTG  
CGGAGACGAGAGTGGCGGCCCTCGTTGGACTCGATGGTCCTGTTGAGGCAGCACCAAGTTGTCCAACGCTG  
CCGAAGGTTTCGCCGCAAAGTTGGCACCCAAATTTGACGGCCCTACAAAGTCGTCAAATTCATATCCCC  
AATATTGTGCGGCTGGTGAAATCAGACGACCGCAAGAAGAGGGTGGCCAACATCTCACAATTGAAACCAT  
TCTACAGAAAGACGACGAGCGACGAAGAAGACGAAGATCCAGGGCACGCAAATGCCACGAGTAAGCG  
AAGGATGAGAGCAACACCCGTCGCCCAACGAACTATTATGATTAAGCTTAGATAAAACTAACATTAACA  
ACATAATTCAGAATAGGCATAGTAAAGTGTGAGCCGCACTGAGAGAATAGGGCATTAAACAAATAAGTAA  
AGAGTAAGTTAACCAATAAGCTGAACTTTTCAGATGGAACCCGAAGTTATCGACATATCGTCAGACGAAGA  
CAACAGCAGCGGGGACACCGAGCCTTTCCCCGGGCGGGAGCCGCAGGCCGTCCGCGCGACCCACGCCA  
GGGGCGTGAGTACTATCGAAGAGAACGGCAAGAAGGACCGCCTCGCCAGTTCCGCCATACACTATTCTCC  
CGGCGGACCGGCATAATGGAGAGGCTAGACGGGATGGTCTTGCTGATGGCAGTCGAGGTCACGACAATG  
TTCGTGGAGGCACCGTTCGCCCGGAACTCGCCACCGTACGCGGAAGAGCCCGCATCTCCGCCCTCGCAT  
CCCCTCGGCACAATCATCAGAGCCGGCAACCCCAACCGCGGCCGGCGAGATGGACGAGGAAGAGTCCG  
CACCGTTCGGAACGGAGGAGCACACACCACCAGCGCAGGACGTGGAGGCGGTAGGAGAAGAGATATCCC  
CGTCGGCCGGAGACGCGGAGTCGCCACCGACGGAGGTGCCGAACGGCATCCGCGCAAACGACGGGGAAG  
CAGACCCGCTGAGCCTCGACCCAGAACCCTTAGTGGGAGGGGACCCGTCAACGGAGGACGAGCCGGAAT  
TCCGTGCGCGCTTTGCCACCCACCGTCTGGAGGTAGACCCGGGCGAGCCAGTTTCCCAGGATAACGCTGCG  
GTACCTACCGAAAGTCCCCGCGGTAGCCAACAAACCCCGTCTGAACCCCGCAAAGCGCGAATGGGGGTGC  
CGAAGAAGGCCCCGGCGGAAAGCGCCGACGCAGCCGCCATCGTCGACGGAGAGCCGCCAGGGGCGAGCG  
TCGCCGGAGTGAGGCCATCGCCGACCCAGTCCCGAGGGAGCATCCTCGTCGGCCGCGAAGAGGCTTCGC  
ACGGAGACCGAGAAGCCCGAAGGATCGCAGCGGTGCGTGCCGCGTTCGCCCGCGAGCGCCAGGAGGGT  
CCTCCCCAGCTCGGGAAGGATAACCGCCGCTGCAAGATCGCTTCTCGAGGAGGGCATCCCGAACCCTGGC  
CGATACCGATTGCGGTCTGCCAGATGGTCGTGGAGGAGCACCGTCTCAGCACCAAGGACGCGGCCGAACCTC  
GGCCGTTTCCACAGCCCGCGCCGAGGCGCCAGACGAAACCTTTCCTAAGGAATCGGAGGAGGAGTGGCTC  
GACGACGAGGACGAGATGCCCGCGCTCGTGCTGTTGCCCGCGCCGAGACACCCGACACCATCGCCCGGC  
GGGAGTTAGAAGACGCTGGTTTCGGCCAAGAAGGCAAGGCGCCATCCCGAAAAGGTTCCCTTCACGGTTTCG  
CCAGGAAGGCCGGGATGAAGTCTGGTCCGAGGAAGAGGACGCGGTGGTGACGGCTTCGTGCCCCAAGCT  
TTCGAGTCCAACCCAGGATTCCTCCCCATGGCTCTAAAGACTCCACGGAGAGCGAGTTGTGGGACGACA  
TAGTGGACCTTTTCGACGGCATCGACGGGTGGGACACTAGCCTGGACTCAGTGCTGGAGGAGGAACCCGA  
CACCGAGGTCGACACGGTCGCCCGCAGTGCCGACGTGAGGGTCACACCGGAGAGCCACCCCAAGAAACC  
CGACACCGAGGTCGAGGCGATCGCCACAGTGCTGACGTTGGGGTAAAACCGGAGGGCCCCGTGCGAGGA  
ACCCGTGCCCGATTCCACCCCTCAGGCTGGAAGGTGTTTCTCTTGGAACACCGTTGTGCTCGGGCGTGG  
TGGACCTAATCGCCAGAGAGGCGCGAATCCGCCGCTTCCGGTGCCGACGTACTCGGTTCCACGTGTCCGA  
CGGGGAGAGCGAGTACAGCGTTACGCTGAACGCGAAAGGCGACGTGACCGTCACCTGTCCGAAGTGAGG  
AGGGGGTGTGAGGCGGCTAATGAGACCAGCCACCCACAGTTTTTCACGGCAAGGAGCCGTCATCCCTTT  
GGCCAAATTACGGCAAGGAGCCGCTGGCGGGACAACGTATTAATTTTTCTTTAGTTATAAGTATTAATTAT  
ATTAGGTTAAGATCTTAGTGAAATAAGAGGCAAGGAGCCATCAGTAATATAAGCAGTTCGATTAGTAGCA  
AAGAGGCAAGGAGCCGCGAATATTATAATTGATTTAAATAGTGAGTTTGAATTTAACCGCCGGCCGCCGC

TGCAACCGTGC GTTGTGTCGATCG GTTGCTCAACACCGTCTTTGAGAGCGCAACTTCAATTCGGCGGCGAAG  
AGCGAAAGCTCCGAGGCGAAGTTGCGAAAGCTCGCGGCGAAGTTGAGCAGCCGAAGCGAGCGCATGGCT  
TGCCGGCGAGCGTGCCGGCACTTGTGATCGAACGTTAAGGGTGAGTAGAAGTGCTGCGCGAGATAAACG  
AAATCATAGATGGTATAGTGGAGCGCTAGGGCTCCAGAAAACAGTGCGGCAGGGTTTAGCTTAGGATTTA  
CGATAAGGTCGGAAATGAATAATAGTGAATAAAGTGCCAACGTTGTAATTATCTAGAAAGTATTGGATTA  
TTCCCTGTTTCTTGGTAACCCGGCTTACCTTAACATCGGAACTAACC GGTTGTCGACCTAACCTCGAACGA  
GGGGCATGCGGTACGAGATTGTGGCTCCGGGGTGGGCATTGCCGGTTGGTGTTTAGGTAGTGGAGTTGGT  
GCGAGGCCACGGCCCGCTAGTGTAGTTGGTGCAGGCCACGGCCCGCTAGCATAGTGGTACGAGGCCACG  
GCCCGGCAGAAAGATAGGGTGTTTAGGTAGTGGAGTTGGTGCAGGCCACGGCCCGCTAGTGTAGTTGGT  
GCGAGGCCACGGCCCGCTAGCATAGATGGTACGAGGCCACGGCCCGATGGTGTAGGTGTGTAGAGGTAG  
ATCTGGGTTTGGTTTGGTCAGGATACTCACCCCCCTTAAGCCCTCTCTCCCAGCGAAATTATAAAATAACTT  
GTA ACTCGCTAGACCTGGTAAGACTGAGAATTATACCCCGGCCAGAAAGCTTCCTTACAAGTGGCGCCCGA  
GCAGGGACCAGAGGCGTTTAGGGGTGTGGCATGTCGGCGGATTAAAGCCCGCAAGCATGCCCGAATAGG  
TATTTTCCAAAAAATATATATAGGGTATTTCTAGTCGGGTATACCTAGAGGGAAGGTAACCTAGCAGAG  
AGCAAGAAAATGAGAAGGTCATGTATGTGCGAAATATGAAAATAGGGTATTAAGTAGTCCGGTATACCCC  
AGAGAACATTCCTATACCTTGTGTTAGGCATAGCCAGAAAATGAACACGTGCAGCTGGTGAGTGACAAAA  
ATGCTAGCAGCAAGCCGGCAAGTAAGATAAAGAGACGAAAACATAACGGTTCGGTCGTGAGAGTACAGCG  
CGCGCGCCAGCCGGGCGACGTCGAGACCACGCTCGCACACGGGTGCCACACGCGCGGCGCAGTCGACG  
TCGGCGTCGAAGGACCGTTAAGGCGTCGCGGCAGCGGTTGTACAGTGGGGCGAATCCA ACTCACGCGCGG  
TGAAAAGTTGAATTCGCGAGTACAGCTGTCGGGGGCAGTGAAGTGGTCACCCTTCAAGTGAATGTGAACA  
AAGGGAACAATAAGAGCGGAACAAGTGCCAAATAAAAAAATAAGTGGATAATAATAAAATTTTCTTTTA  
TAAATAAAATTAATTAACAAAAAATAAATAAAAAAATAAGTGGATAATAATAAAATTTTCTTTTAT  
AAATAAAATTAATTAACAAAAAATAAATAAAAAAATAAGTGAATAATAATAAAATTTTCTTTTANAA  
AAAAAAATTAATTAACAAAAAATAAATAAAAAAATGAGTGGATAATAATAAAATTA AAAANAAACC  
GAGGTTCAACAATAAAGATAAAGGCAGCGACCACATAAGGAACAGCCTAAAAAGCGGAAAAAGTGAGAA  
AAGAAAATTTTGAATAACCTTTTGTGAGTTTTTTTAAAAAAGGGGGTAAATACTTTTGTGGAATATTGT  
TTTGTATTTTGT TTGGTGAAAGATATAAAGACAAAAAGAAAAAANAAAAGAAAAAACTAAAA  
AGGAACCAAAGTGGCTGAGCAAGATCGGCGTAAAAGTGAAAAAGACACCAACACCAAGAAAAGGAGAG  
AGGAATAGTAAAGGGACCGACGGAACCCCTAGAACGGGAAGAGAGGGAAACAGCGACGTCGACTAGCA  
AGGAAGTATACAATAAAGGATGGAGGCAGGTGAGTGCCAAAACCCGGGGGTAGGCGTCCGCTGGATTCA  
CCAGCGACGCAAAGAGGAGTTAGTGGCGATCGCCAGGAGTTTGGGCTGGAAAAGGAGGGGCGCGTGGA  
GGAGCTACGTAAGCGGCTGTCCACCTACGTGCAGGAGGGCGGTCA TTCGACTGGGATTTGGGCTCGGCTC  
GCCGAGCTGGAATCCCAGTATGCTAAAACTCTTGAGCCGCCATCTTGGGGCGTCCCACCCGACTTTGGTGG  
ACGGCCACGGCAAAAGTCGGAACCTGACCTCAGAAGCTCCCAGCTGTACGGGCTTTTGCAGGCGCCACC  
CCGAGTTTGACCGTCTCGGGCGTGGAGGCAGTTCCTGCTCTCGGTGGAAATGAAGACCGCCGAGCAACTG  
CGGTCAACGCAGAGGTGGGGAGGTCCCTGTTGAACCGGGTGGTGGTCCCTGCTACACTAGGCCGCACCA  
TCCATCGGAGGCGAGGCCACTTCCCAATGTCCCGGAGCAAGTTCGGAAGTGGGGTATGAGGTACGATGGA  
CGTCCGACCCCTTGGGTTCTTAGAGGACCTCGAGGAGCGCGCTATCACCTATGGTATAGCCCTCGACCG  
TATGCCCAGGGCAATGAGCGAGGTATTCTGCGATAGGGCTGCTCGTTGGTTTCTGAGCAGTGGGCTAAGG  
GATGTGCCGTGGGCGGTGTTTAGGAGGGATTTCTTGAGTTTCTTGCCCCCTCGTTACTTCGAGAGGGCTT  
GAGGACGAGATCCGATCCCGGAGGCAGCGCGTAGGTGAAGCGTTCAAGGAATATTTGATAGAGCTGAGG  
GCTCTTATGCACCACGCTAGATACGAGCCGGCACAAGAGCTGCATCGGATCTACGAGAACGCCGCTCCGG  
AATACAGGCTCTATGTGCGACGGCAAGACTTTTCTACCCTATCCCAGCTAACTCAACTGGCCGTAGAATAC  
GAGACCGTCGTGAGGCAGAGGGCGGAGTACTCAGGCAGCCAACCCTTGGGTGAGGGTGTCTCTAGTTCAA  
ATAGTGCAGAGTGGGCGAGGACGGCGCAGTCCTCGGGACATCTCAATCCGTTCCGGTCTGCTCCCAGCGG  
ATCCGGGACGACCGTTGTGGACAACAGGGTCTCCACCCACCCGCTGCAACTCACGCAGAGGTGGCCCAT  
CAGATGATGAGCCAAGAGGCCGGGAACGGATATGATCCGCGACGGGCGTGTGCTAGGTGCGCACAGGAG  
GGGCATTTTGCCAGGGAATGTCCCAACGCCCTGTCTTATTTTGTGTTGGGTATGTGGAAGCCGGGGCCGAAG  
TAGTCGGGAGTGTGCGCGCGCGGAGACGGGAACGGGCAACGGCGTTCGTCGGGACCAGGATCGGGT  
CGGCGCCAATACACGCGGAACGCAGCAATAGGACACCCACCGAAGGTGGACGGTGGCCGGATCGTCGCT  
ACGGTAGAGATTGGCGGACGAACGATGCCCGCCACGATCGATACCGGAGCCACTCGTAGCTTCGCGAGTG  
AGGACTGCGTACGCAAATGGACGATCCGGGGGAAGAGCGGAGGAAATACAGGCACGTATCCGCCTGGCAG  
ATGGGTCCACCCTAGAGGTAGAAAAGGCTTTGAGAGTAGACGCCAGCTTAGGGGGAAAAACGATCAGCA  
TGACGATGCTCATCATGCCCTCAATGCTGGACCATGTAATCCTGGGTATGGATTTTTTGGGGGCGATGAA

TACCACAATACGCTGCGGCGAGGCGGAACTGGTCCTAGAAGCAGCGACGACACCGGGCGTGAGGCCAGG  
AACGAGCGAGGAGTCGGAGGAAGGCCNCCCAAGGCATGGAAAGGGAGCACCTGCTCGGCTACAGAGGG  
AGCCGGAGGAAGGCCTCCCAAGGCATGGAAAGGGAGCACCTGCTCGGCTACAGAGGGAGCCGGAGGAA  
GGCCTCCCAAGGCATGGAAAGGGAGCACCTGCTCGGCTACAGAGGGAGCCGGAGGAAGGCCTCCCAAGT  
CATGGGAAGGGAGCACCTGCTCGGCTACAGAGGGAGCCGGAGGAAGGCCTCCCAAGNCATGGAAAGGGA  
GCACCTGCTCGGCTACAGAGGGAGCCGGAGGAAGGCCTCCCAAGTCATGGATGGGGAGCACCTGCTCGG  
CTACAGAGGGAGCCGGGAGGAAGGCCTCCCAAGTCATGATGGGGGAGCACCTGCTCGGCTACAGAGGGA  
GCCGGAGGAAGGCCTCCCAAGGCATGGAAAAGGGAGCACCTGCTCGGCTACAGAGGGAGCCGGAGGAA  
GGCCTCCCNAGGCATGGAAAGGGAGCACCTGCTCGGC

>9\_rnd-1\_family-368\_\_LTR\_\_Gypsy  
TGTAATGGTCGCAATTTTCCTATTTGAATTAAACCGCGTAAGCGATCCTAACAGCTTGCGTTTGTGTAACG  
ACGCTATAGCGATCAGCTTTTGTCTGTACGGTCAGCTGCGAATGATTCTGCCGCTGCTATAAACCGCCTG  
CGTGCACGTTGGCAGCGCAGCTATCTTCAATCTAATCCGCGAAAGAAAAAGCTCTGAGACCCTATATAAG  
CCTGTAGGTCCCCGATATAACCCTTCTTTTTTCAAAAATTTCTTTACCATCGAAGGTCTGGCTACGGCGGTT  
CGGACATAGCCCCACCAAAAAAATTAACTAAAAGCATCAGTCGTTTAATTCGTTGAATTTAAATTCCAA  
CTAAATTGAACCAAAAAAAAAAAAAAAAAAAAAAAAAAAGGAAAACCTAAAAGTGGCCGATGGGCGA  
AATATCAATTTTTTTTGTTCGTTTGATGATAAACCTTTCGCTACGCCAGCCGGCCACCAGCACCTCACCGGC  
ATATATTTCTTTGTGCCAAGATCTGGTCACTGTTTTAACCAGTTCTTGTCTGCCTGCCGAAAGTAATTTTTG  
GAGGAATCAATCTTGCCGCCGCCGTCTCTGACATAAAACCCACTTATTTTGAGGCAACCGCCACGTGTGCC  
CATTGGACGGCACTGTAATTTCTTGGGACGGCAATGTCAATTTCTGCCCCATTAAATAGACGTCAGCCTCA  
ACTGCGGATCAGCTGCCATTCCCTTGCTCATGCCAGCAAGAACGGGCAGGCGCCGTTTCCACAGTCTGGA  
ATCCGGAAGAGGGAGTAGCCTTTTGGGCCCCATTGACGCGCCGCTGATCAGAAGCCCAGATGACATCGCC  
CATTAAAGTTGGCCGGAGCGTGCAGATGCATGAAAATTGCTGTAAATGTTTTTAGTAAAAAAATTGTTAAT  
TAAATCTTGTGAGAGACTTCCAAAAGTTTGTGCAAAGTGCATTNATTAGGGCCCTCAAAAACCGCGTGCA  
AGTGCAGGGAAAAAAATTTACATCTATATACATATCTTTATATATATAGAAAGGAATAATAGTATA  
AATCTATCCCCCTTCTTGTGTTGGGGTAGAGTCCAAAGTCATTTCTGAATTTTTTCCACTTAGTTTCGGAGAGT  
ATCTTCTAAGTACTCACAATTTAAAAACCCTCCTGTGCCATAATAATATAATCAAAACAATTTAAAGCCCC  
ACAGAAGACAAAAGAAAACAAATGAAAGAAAAAAATAAAATTTGCTGCAAACTCTCCGCTGGAAGGC  
CTTTCATCGAGGAATACATGTAAGTCTGTACCTTTTGTTTTGAGTATATTTTCTTATTTTGGCACAGATAAG  
CACAGCCAAGCTGACATGCGCACCTGCTGAGTTTTTTTCGACTTTCTGTTTCACATTACGCTTTAGCTCCGA  
TCAATATGTTTATGACCGTGTGAGTCTGGTGAATGCTTATCATCTTTGATTCTACCTACACCCCGCTCAATT  
ATTAGCTGAAACAGAAGCAACCTAAAAGAAAAGATTTTTTAACAGAATCAAATATATGTACACAAAGATGT  
ATCATCGTATTCATGATCAGCTGGTTGCGCTGCGCTCCGATTTGCCCATGCGCTTCGAGCTTAACCTTCTG  
TTGCCCATATTTTTTTTCGACCATAACAATTAACCATCAACTACAATTATATTGACTCTATTATAATAAATTTT  
TTTGCTTTTGCCGAATACACTTTAGTTCAATTTACTAATGTCAATTTTTTTTCTTGCCTAGCCTTATTCTATAAT  
TATTAATATGCACTTTAGCGAAATTTTGAGATTTTTTTTTTTATTTTGCTCAATAAGAGAAAAAAATATTA  
ACTGAATAGTTTATAAAATGAATTATTTTTGAAGAATTTTTTGAGCCATTGTAAAAATATTAAGTACTGACTAG  
TTTTAGTTACTGAATTATTGTTGAATCATTAATGCCACTTGTAATAAGATGCAGATTATCCAACGGAAGGA  
TTCAATTTTATTGAATAATGCTTTTGTTTATAATAAATATTAATTACGGATTTTGATTATGAATTGCTAAGT  
TTTCTTTCTGTTGACATGGTGATATAATGTGCTAGAAAGANTGTTTTTTTGGGATCTTCAAAACCTTAAAC  
GCTGAAGATCATGGTTGGGAGGGTATCGAACGCGAGAGTCAGCTTACATCCAAGACTTCGCCTCTTCGGA  
ATATATATGCCCCAATGAAAGCTATCACCATTGTATTGGCACTTTAAGTGCTCGTTAAGTTATGCCTGTTT  
GAGATTTTGTCTTTCGGAGTATCGGTCTCCAATTTAGATTCTGTAGGGATCCTAAAATAAAATTGTGTAT  
GCAGGTGAGACATGGCAAAAAGAACCCCAAGAGCTAGGGGAGCAAGAGGATCCCGCCCTGC  
CATGCTAACTCAACCACGAGGGGCTCGGTGAATACTTCCCGAATTATTTTTGTGAAGATTGGCTGCCAAC  
GCCGTCACCGTTGCTACCCGATATGTATTGCTAGAGTAGCTTCACCACAGTACATGCTACATAAATTTTTG  
GCGCCCAATCATGGGGCCCGAGGTTGTCTATATAAAAAAAAAAAGAGTCTTATATTATTGTCCACGCACG  
CTGACGTCGATGTGACTGGTTTAGTCTATCTTCCGCATGCGCAGATACTGGTAGTATAACAAGATAGTAATT  
AGGACTACGATGCTTACAATTCAGAGCTTGAATTATGCCGAGAATCTGACCTTACTATATTGTTGAGTGCC  
TATATATAAACACGACTATAGTTATTAACACCAGCTATACAATCGGTCCCATAACATTTGCTCGTTTTCTTTC  
TTATAATTTTGGAGAAACAACAGATTAGGTTTGCTTAGGTAGAAATACTTTCATATGCAATTTTAGAATAC  
TGCATATTTTGATAAGATATCAGTACTGATTGCTACTTGATAGCTTGTGGATGGTTAAGTAAATCTCAGTC  
TTCGTGGAGCCAAAAGTTATAAAGTTAGATTGAATGGTTTTGTATTAACGATACTATCAAAGATAGTTAGA  
ATGTTGCCCGGAACCTTGCCCATATGCTGCTTTGCATATCCTTGCCGAACATTTCTGACTGGATTAAAATGT

TGAATGTTACAAACCGCTTTCTAAAGTAGTTTCAATAAACCAGATAAATTACCTACTTTTCATTGAGGCGAT  
TATATTTTCGTAATTAATAAAAAAAAAAAAAAAAAAAAAAAAAAACTTCTACTCTATTATGTTACCAAACCAA  
TGTCACGAATCAGGAAAACTTAATTAATCATGTTGCCTTTACGCAGCCCACAAAATGTACAGCCGTCGTC  
AGAGAGAGCTGATAACCACTGTGTTCTATGCCAGTTAGTAATGGACAATACACAGTCTTGCTATTGCACCC  
CTTGTAGGCATGTTTTTTCACAACTTTGCTTGGAAGGTTGGTTGGTAAACCATGCTAAATGTCCCAGTTGT  
AGTGCTGTGATTGACCCAGCCTCAATTAATTAAGTTGTTGGAGATTGCTCGCCGAGAGGAAAACAATCTG  
CTCCACCTCCACCTACGAACATAGGGAGAACGGTAACGCGCAGTCTAGCAAAATCTCTTAATCCTGGTCC  
GACCCAGAGTGGCGAGAATCCAACAGCAAGGTTATTAGATGTTAGTGATGTACCACAATCAGGACTCGAC  
GCTAGCAATAGCACGAATCCACCTGAAATCGCTCCTGCACGACCAGCTCCTGGTGTAAAGAAGAAGAGGAA  
GACCCACTCAGTCCAATAATACCCGCCAAAATCTGGGAGTGGACTATAGGATAATTCAGGAGATGATCGA  
ACAATCAATCACTCGCGTTATGTCATCACTGCAAATGCAAGCAACACCCCTTTCCAAGAGTGTTGCCAACCC  
CGATCCCGGTGTGCGCTAGTAGTTTCGTCATTCCGAAATGGAAAAATTGCTGACACCATGCAAAAATGGAA  
TCTTAATTTTCGATGGGTCTACCGAAGGATTAGGGGTAGAAGAATTTCTATATAGAGTCAAAACATTGACT  
GATGAACTTTAGACAGCGACTTTATGGGTCTCTGTAAGCACTTACATGTGCTATTTTNGGCCAAAGCCCGT  
GACTGGTACTGGCGGTACCACAAGCAGGTAGACCACATAGTCTGGACTGAATTTTGTACTGCACTTCGCC  
ATCAGTACAAAGATTATCGCTCCGATTTTATGAGCAAGGAACTAGTAAGAGCTAGAAAGCAAAACCCCTGG  
GGAATCATTGTGTCGTTCCATGACGCTGTAGCGTCACTGATCGATAAATTTGCAATTAATAATTGACGAGG  
AGGAGTTAATCGAAATTTTAAAAATAATTTATTACCCGAAACCCGACATAAACTGCTATAACCAGCCAAT  
AAGTTCAGTTGGCCATCTACGTAGATTGGTCCAAATGAACGAGAATTTAGTTCATGAGCTCAGTTGTCGCA  
CTGATGGTATGAATAAATCCAGGACTATTGGCCGTCGCCAAGTATATGGACTAGAAGAGTCTTTTATTGA  
ACCGGAGGTAGAAAATTCAGAAGATACAACTTTGACATCGCAGCAATTCGTAGATGTCATGCCAACTTT  
AAATGTTGGAAGTGCAGAGCAAGGGCATCTGTGGGAAAATTGCCTTGCTGACCGCCGTATATTCTGTT  
ACGGATGCGGGGCACCCAACATTTATAAGCCCCAGTGCCAAAATCTGTATCCGTAAAGCTTCGGAAAACCA  
ACAGAAGGGTGCATCCAGCAGCAGTCGGATGCCCCCAAAAATCTAATTAATTCCCATACGAACTGTGTAC  
CTGTGGACCGAAGCAAAAGCTTGGTCCCTACACCGACTTTAAAGTCACATTCCAACAATTTAGAAATAGC  
TAAAACTATTAAATTACGATTTTACCGTATCATGAACGGTTAGCTAATTATTTGCATGTCCGAAATAAGA  
TTTTTTATGAAGAAAAACCCCGTATTTCTCAGCGAACGCAGCGCTTGAAAAATTATTATCAAAAACAAGC  
AACATAGCAAGCTTTTAGTTTCGACAGTTTTTGCAATCCCACCGATATGCGCAGCTATGCCGAAGTGTAT  
TTTTAACCTTTACCGAGCTTGGTCTATTGGATACAGGCGCGAATATTAGCTGCATAGGTTCTACGCTTGCG  
CAACAAGATTTTACCGCAATGCCGGAATTTAAGCCTATTAAATCGCATGTCAGAACAGCAGATGGCCATA  
GTCAGAAAGTCATCGGAGTGCTTGAAGTTAAAATGCAGTATAAATCGGCTACCAAGTCCTTGAACTGTA  
CGTGATTCTTCTATAAACCACAAAATCTAATTTTGGGTCATGATTTTGAGAGCCTTTGAGCTTGCGCCAAG  
CATTATAAATTCTGTAGAATAAAATCAATGGAAAAAGAGCAGGAAACAGAGTCGATTGCATACCCCTTA  
GATAGCCAGCAAACGCAACAGCTGCACGTAGTAAAGCAGTTGTTCCCCAACGCTGCTGATAGATTAGGCC  
GCACAACATTGATCCAACACCGTATAGATATAGGAGACGCACGTCCAGTGAAACAAAGATTCTATCCTGT  
AAGTCCGGCCGTAGAAAAGTTGTTATATGCAGAAATTGATCGCATGTTGCAGCTTGGAGTTATTGAGCCG  
TCTGTAAGCGCTTGGAGCTCGCCTATGCGACTCGTCCTTAAGCCCAACAAGGTGCGCCTTTGTCTGGATGC  
TCGAAGACTGAATGACGCCACAAAAAAGATGCTTATCCTTTGCCGAGCATCGATGGCATTTTTTTCGCGGCT  
ACCTAAGGCGAAAATAATTTCCAACTAGATTTGAAAGACGCCTATTGGCAAATAGAACTTTCCGAGGAT  
TCAAAGCCTCTCACTGCTTTTACGGTCCCCGGAAGACCGCTATATCAGTTTAAAGGTCATGCCCTTTGGCCT  
TTGTAACGCGCCTTCTACCATGTGTGCGGTTAATGGACGAGATAATTCCTTCTGACCTGCGCTATTGCGTGTT  
TGGTTATTTAGATGATCTGTGTATTGTGTCAGAAGATTTAGTTTACATCTGGCGGTATTGGTGCGCATCG  
CTGAGCAGTTTAGAAAAGCCAACTTGACTTTAAATATTTTCGAAAAGTCAATTCTGTGTAACAAGTATCAAT  
TATCTTGGTTACGTGATTGGTAGCGGAGGTATTTGCACAGATCCGGAAAAAGTAGCTTGTATTGTAAATTG  
GCCGCCGCCAAAAACTTGAAGCAAGTTCGAGGATTTCTAGGAGTTTGCGGTTGGTATCGTCGGTTTATATG  
CACTTTTCCGATCTCACTTGCCCCATAACGGACATATTATCGACAAAGAAAAAGTTTGAGTGGACCCCTG  
AAGCACAGACCGCAATGGACAACTTAAAAACAGTGCTAACATCCTCGCCGTTTTTAAAAAATGCTGACTT  
TAAGAAGAAATTTTTCTTACATTGTGACGCTAGTGATTTTGGCATTGGCGCCGTTTTAGTACAGATGTCTG  
AAGNTAATGAAGAACACCGATAGCTTTCATGTCAAAAAAATTAAGCCGTGCGCAGCGAAACTATAGTGT  
TACCGAGCGTGAATGCCTAGCAGTCATATTAGCCATCGAGAAGTTCCGATGTTATTTGGAAGTCCAGGAA  
TTTGAAGTGGTTACCGACCATTTAGTTTGGCTATGGCTTATGCGCCAGCAAAATATATCGGGTAGACTGGC  
ACGATGGGTTTTTCAGACTGCAACAATTTAAATTTCCGTCTCCCATCGGAAAGGCAAGAACACATTGTTC  
CCGACGCTTTGTCTCGGTTGCCTGAGAATGAAATCGCTCAATTAGACATGGGTCCTGTAATAGATCTTGAG  
TCCGATACATTTATGGACGCTAGCTATGTACAAATTAAGACAAATTTTCCAAAATNTTACTCAGTTTCC

GGACATCAAAATCGTTGATAAGTTTTTGTATGTACGCACCGAACATTCGAGGGGAGACTCGACACCAGAA  
AGTCCTTCATGGAACTATGGGTGCCTGATCGACTTAAAGTCGATGTGCTCAAACAAGCCCATGACAGCA  
TAACGTCGTCTCACGCCGGCATGCAAAAACCATTTGAGAAAATCCGCAGACATTTGTTCTGGCCAGGATTA  
GTTAAAGATGTACGTGAATACATACGAAATTGCGAGATATGTAAAGAACTAAGGCTCCAAATTATACCC  
TTCGGCCACCTATGGGTGCTCACATCCCAACTTGCAGACCATTTCAAAGGCTTTATATTGACCTGCTTGGG  
CCATACCCTAGAAGCAAAAGCGGTCATGTGGGATTGTTAATAGTCTTAGATCACTTTAGCAAGTATCATTG  
GTTGCAGCCCCTGAAGAAATTCACCTCAGCTGTGATACAAAAATTTCTTCTTGAACAAATTTTCCATTGTT  
TTGGTGTGCCACAACTATAATAAGTGACAACGGCACCCAGTTCAAAGCTCGTGAGTTCAATGCCTTCTTA  
GCCGAACCTGGCATTGAACATCTGTATACAGCTCTATATTCACCGCAGAGCAATGCTGCAGAACGAGTTA  
ACCGCTCAATACTCGCCGCCATTTCGCTCGTATTTAAAACAGGATCAGACCCATTGGGATGAACATATTACA  
GGGATTTTCATGCTCCTTAAGGTCTGCTCTGCACCAATCGATTGGGTGTTCCCCATACCGTGCCCTATTTCGG  
GGTGGATATGATCACTCATGGTACCGATTACAAATTATTGAAGGAGTTGTCCTTATTGGAAGAACCGCTG  
GTCCCCCTGTTGCGGTCTGACCATTGTCGTAAGGACAGATATTCAGAAAAACATCAGGAAAGCCT  
ATGAGCGCAATGCGGCTCAATATAATTTACGCAGCAAGCCTGTTTCTTTTCGTGAAGGACAGGAGGTGTTT  
TGTCGAAATTTTTCGCTTAGTAAATTCTCACACAATTTTAATGCTAAACTGGCTCCCCAGTTTATTAAATGC  
CGTGTCAAAAAGAACTCGGCAATTGTTTTTATTCCCTTGAAAATCAGCAAGGAAAAGAAATTGGCACTT  
TTCATGCCAAGGACATTAGAGTCTAATTCCTCGCTAATATACCCGTCTAACGGTAGGATATTATCGGGTGGT  
GTAATGGTCGCAATTTTCTATTTGAATTAACCGCGTAAGCGATCCTAACAGCTTGCGTTTGTGTAACGA  
CGCTATAGCGATCAGCTTTTGTCTGTACGGTCAGCTGCGAATGATTCTGCCGCTGCTATAAACCGCCTGC  
GTGCACGTTGGCAGCGCAGCTATCTTCAATCTAATCCGCGAAAGAAAAAGCTCTGAGACCCTATATAAGC  
CTGTAGGTCCCGGATATAACCTTCTTTTTTTAAAAATTTCTTTACCATCGAAGGTCTGGCTACGGCGGTTT  
GGACATAGCCCCACCAAAAAAATTAATACTAAAAGCATCAGTCGTTTAATTTCGTTGAATTTAAATTCCAAC  
TAAATTGAACCAAAAAACAAAAAATAAAAAACAAAAAGNAAAAGAAAGGCGAAATATCAATTTTTTTTGT  
CGTTTGATGATAAACCTTTTCGCTACGCCAGCCGGCCACCAGCACCTCACCGGCATATATTTCTTTGTGCCA  
AGATCTGGTCACTGTTTAAACCAGTTCTTGTCTGCCTGCCGAAAGTAATTTTTTGGAGGAATCAATCTTGCC  
GCCGCCGTCTCTGACATAAAAAACCCACTTATTTTTTGAGGCAACCGCCACGTGTGCCCATTTGGACGGCACTG  
TAATTTCTTGGGACGGCAATGTCATTTCTGCCCCATTAAATAGACGTCAGCCTCAACTGCGGATCAGCTG  
CCATTCCCTTGCTCATGCCAGCAAGAACGGGCAGGCGCCGTTTCCACAGTCTGGAATCCGGAAGAGGGAG  
TAGCCTTTTGGGCCCCATTGACGCGCCGCTGATCAGAAGCCCAGATGACATCGCCCATTAAGTTGGCCGG  
AGCGTGCAGATGCATGAAAATTGCTGTTAAATGTTTTTTTAGTAAAAAAATTGTTAATTAAATCTTGTGAG  
AGACTTCCAAAAGTTTGTGCAAAGTGCAATTNATTAGGGCCCTCAAAAAAACCGCGTGCAAGTGCAGGGGA  
AAAGAAAAAAATTTACATCTACATACATATCTTTTATATATATAGAAAGGAATANTAGTATAAATCTATCC  
CCCTTCT

>9\_rnd-6\_family-342\_\_LTR\_\_Copia

ACTGCTCGACTCTGCCGGGACTGCCGATCTGCCGACTGCCCGACTGCCGGACTGCCGACTTGCCGGGACT  
GCCGACCTGCCGACCTGCCGGACTGGCCGATCTGCCGACTCGCCGGGACTGCCGACCTGCCGATCTGCCG  
GACTGCCGGACCTGCCGACTGCCGACTCTGCCGGGACTGCCGGACTGCCGATCTGCCGGACCCGCCGGC  
TGCCGCCGGACTGCCGGACCGCCGACCGCCGACTGCCGATCTGCCGGGACTGCCGGATCTGCCGGACTGC  
CGGACTGCCGATCTGCCGAGACTGCCGCCGGATCTGCCGGACTGCCGATCTGCCGACTGCCGGGACTGCC  
GACTGCCGGATCTGCCATCTGCCGGACTGCCGACTGCCGGACCGCCGACTGCCGGACTGCCGGCCGACTG  
CCGGACCGCCGATCTGCCGGACTGCCGACTCCGCCGGACTGCCGACTGCCGATCTGCCGGACCGCCGATC  
TGCCGGANCCGCCGGACTGCCGGACTGCCGATCTCCGATCTGCCGACTGCCGATCTGCCGGATCTGCCGG  
ACTGCCGATCTGCCGGATCCGGCCGACCGCCGGACTGCCGGNCCGCCGACTTGCCGACTGCCGGACTGCC  
GGATCTGCCGATCTGCCGGACTGCCGGTCTGCCGACCGCCGATCTGCCGGACTGCCGATCTGCCGACTGCC  
GGATCTGCCGATCTGCCGGACTGCCGACTGCCGATCTGCTCGAGACTGCCGGACTGCCGATCTGCCGATCT  
CCGGACTGCCGCGATCTGCCGGACTGCCGACCTGCCGACCTGCCGACTGCCGATCTGCCGATCTGCCGGN  
CTGCCGACCTGCCGATCTGCCGGACTGCCGACTGCCGACCGCCGACTCGCGCCGACCGCCGACTGCCGAT  
CCTGCCGGACTGCCGGCCGCGGGACTGCCGATCTGCCGATCTGCCGACTGCCGACCGCCGATCTGCCGG  
GACTGCCGACTGCCGACCGCCGATCTGCCGGACTGCCGATCTGCCGGACTGCCGATCTGCCGGACTGCCG  
GACTGCCGATCTGCCGGACTGCCGGGGCCGACTCGCCGGACTGCCGATCTGCCGGACTGCCGACCGCCGAC  
CGCCGGACTGCCGATCTGCCGANCTGCCGACTCGCGACTGCCGATCTGCCGATCTGCCGGACTGCCGGAC  
TGCCGGGACTGCCGATCTGCCGACCTGCCGGGACTGCCGATCTGCCGACTGCCGATCTGCCGGACTGCCG  
GACTGCCGATCTGCCGGGACTGCCGGGACTGCCGGNCTTGCCGACCGCCGATCTGCCGGACTGCCGGACC  
GCCGGACTGCCGATCTGCCGACCGTGCACCGCCGATCTGCCGGGACTGCCGATCTGCCGGGATCTGCCGA

CCTGCCGATCTGCCGGACTGCCGATCTGCCGATCTGCCGACTGCCGGACTGCCGANCTGCCGACTGCCGA  
CCTGCCGACGACTGCCGGACTGCCGATCCGCCGGANCTGCCGGATCTGCCGGACTGCCGGACTGCCGATC  
TGCCGGACTGCCGATCTGCCGATCTGCCGGACTGCCGANCCGCCGACCTGCCGATCTGCCGGACTGCCGAC  
TGCCGACTTGCCGATCTGCCGACTGCCGGGCCGACTGCCGACGACTGCCGANCTGCCGGACCTGCCGGAC  
TGCCGACGCCGGGATCTGCCGATCGCGACGCCGCCGACCGCCGACTGCCGACTGCCGGGACTGCCGGCCG  
ACTTCGCCGACTGCCGATCTGCCGGACGCCGATCTGCCGGGACTGCCGGACCGCCGATCTTGCCGACTGC  
CGGACTGCCGGACTGCCGGACTGCCGATCTGCCGGACTGCCGACCGCCGATCTGCCGGGACTGCCGACTG  
CCGATCTGCCGGACTGCCGGACTGCCGACCGCCGACTGCCGATCTGCCGGGACTGCCGGGACTGCCGGNC  
TGCCGATCCCCGACGCCGACCTGCCGGACACCCGGGCCGACCCGCCGACTGCCGACCGCCGATCGCTGACGC  
CGACCGCCGACTGCCGGACTGCCGATCTGCCGACTGCCGGACTGCCGACTGCCGGACCGCCGGACTGCCG  
ATCCGTGCCGGGACTTCGGACTGCCGATCTGGCCGGGACTGCCGATCTGCCGACCTGCCGGGACTGCCGT  
CACTGCCGGGACCGCTCGACCTGCCGGACTGCCGGACTGCCGACTGCCGACTGCCGGGACTGCCGGGACT  
GCCGGGACTGCCGACCTGCCGATCTGCCGGACTGCCGATCGCCGACCCTGCCGACCTGCCGACTGCCGGA  
TCTTGCCGGACTGCCGGACCTGCTCGACGGTCTGCCCTGCCGGACCTGCCGACTGCCGGGACTGCCGGGA  
CCGCCCCGACTGCCGATCTGCCGACGGGACTGCCGGACTGCCGACTCTGCCGGACTGCCGACCTGCCGATC  
TGCCGGACTGCCGATCTGCCGGACTGCCGATCCGCCGACCGACTGCCGGGNCGCCGACTGCCGACTGCCG  
GACTGCCGGNCTGCCGATCTGCCGGANCTGCCGACTTCGCCGGACTGCCGACCGCCGACTGCCGACCTGC  
CGACTGCCGGAATCTGCCTGCCGACTTCTGCCGGACTGCCGATCTGCCGGACCGCCGACCGCCGGACTGC  
CGGACCTGCCGATCTGCCGATCTGCCGGGACTGCCGACCGCCGATCTGTGCGGGCTGCCGGAATGCCGA  
CTGCCGANCTGCCGANCTGCCGAGCCGACTGCCGATCCCCGACTTGCCGGATCTGCCGGGACCGGACTGCC  
GGACTGCCGATCTGCCGAGNCTGCCGGACTGCCGACCTGCCGACTGCCGGACTGCCGATCGCCGGGTCTG  
CCGGACTGCCGATCTGCCGGGACTGCCGANCTGCCGGGACTGCCGATCCGCCGACTGCCGGANCTGCCGA  
CCTGCCGATCTGCTGCCGATCTGCCGGACCTGCCGGACTGCCGATCTGCCGGACTGCCGGACCGCCGATCT  
GATCGGCTCCTGCCGGGACCGCCGACCTTGCCGACCTGCCGGGACCGCCGATCTGCCGATCTGCCGACCT  
GCCGGACTGCCGACCGACTGCCGGACCTGCCGGACCGGCCGACTGCCGGAATCTGCCGGACTGCCGACTG  
CCGACCGCCGACCGCCGACCCGGCCGATCTGCCGGACTGCCGACCTGCCGACCTGCCGGACTGCCGATCT  
GCCGGACTGCCGACTGCCGATCTGCCGGACTGCCGGACTGCCGACTGCCGATCTGCCGGACTGCCGACCT  
GCCGANCTGCCGGACTGCCGATCTGCCGACTGCCGGACTGCCGACCTGCCGACTGCCGACTGCCGACTGC  
CGGGACTGCCGGACTGCCGATCTGCCGACCTGCCGGACTGCCGATCTGCCGGATCTGCCGGACTGCCGAT  
CTGCCGGACTGCCGACTGCCGATCTGCCGACTGCCGGGATCTGCCGGACCGCCGGACTGCCGACCTGCCG  
GACTGCCGACTGCCGACCTGCCGGACTGCCGGACTGCCGGACTGCCGACTGCCGGGACTGCCGACTGCCG  
ACTGCCGGACTGCCGATCTGCCGACTGCCGGNCTGCCGGACTGCCGACTGCCGACTGCCGATCTGCCGGA  
CTGCCGACTGCCGGCTGCCGACTGCCGACCGCCGACTGCCGGACTGTGCATCTGCCGGGACTGCCGACTG  
CCGATCTGCCGATCTGCCGGACTGCCGACCTGCCGGACCTGCCGACTGCCGGACTGCCGACTGCCGGNCT  
GCCGGACTGCCGATCTGCCGACTGCCGGACTGCCGGACTGCCGACTGCCGGACTGCCGGATCTGCCGGAC  
TGCCGATCTGCCGGACTGCCGACTGCCGATCTGCCGATCTGCCGGATCTGCCGACTGCCGACCGCCGGGA  
CTGCCGATCTGCCGATCTGCCGACTGCCGATCTGCCGGGACTGCCGATCTGCCGACTGCCGACTGCCGATC  
TGCCGACTGCCGACTGCCGGACTGCCGACTGCCGGACTGCCGATCTGCCGACTGCCGACTGCCGATCTGC  
CGGACTGCCGATCTGCCGACTGCCGACTGCCGACTGCCGACCTGCCGACTGCCGACTGCCGACTGCCGAT  
CTGCCGGACTGCCGGNCTGCCGGGACTGCCGATCTGCCGGACTGCCGATCTGCCGGACTGCCGACTGCCG  
GGACTGCCGACTGCCGATCTGCCGGACTGCCGGCTCGCCGACTGCCGGACTGCCGGACTGCCGATCTGCC  
GACTGCCGACTGCCGGACTGCCGATCTGCCGGATCTGCCGGACTGCCGGGACTGCCGATCTGCCGGNCTG  
CCGACTGCCGATCTGCCGACTGCCGATCTGCCGGACTGCCGATCTGCCGATCTGCCGACTGCCGATCTGCC  
GGACTGCCGGACTGCCGACTGCCGATCTGCCGGGACTGCCGATCTGCCGGACTGCCGGATCTGCCGANCT  
GCCGACTGCCGGACTGCCGATCTGCCGATCTGCCGACTGCCGATCTGCCGGACTGCCGGACTGCCGACTG  
CCGACTGCCGATCTGCCGACCTGCCGGACTGCCGATCTGCCGGACTGCCGATCTGCCGATCTGCCGACTGC  
CGGACTGCCGACTGCCGACTGCCGACTGCCGGACTGCCGGACTGCCGATCTGCCGATCTGCCGGACTGCC  
GATCTGCCGATCTGCCGACTGCCGATCTGCCGATCTGCCGACTGCCGGGACTGCCGATCTGCCGATCTGCC  
GATCTGCCGACTGCCGACTGCCGACCGCCGACTGCCGATCTGCCGACTGCCGATCTGCCGGACTGCCGGA  
CTGCCGATCTGCCGACTGCCGGACTGCCGACTGCCGATCTGCCGACTGCCGGACTGCCGATCTGCCGANCT  
GCCGGACTGCCGACTGCCGGACTGCCGGACTGCCGATCTGCCGGACTGCCGATCTGCCGACTGCCGGACT  
GCCGGACTGCCGATCTGCCGACTGCCGGATCTGCCGACTGCCGGACTGCCGGATCTGCCGACTGCCGATC  
TGCCGGACTGCCGATCTGCCGGACTGCCGATCTGCCGGNCTGCCGGGACTGCCGATCTGCCGACTGCCGG  
ACTGCCGATCTGCCGATCTGCCGACCTGCCGACTGCCGATCTGCCGGACTGCCGGACTGCCGATCTGCCGG



GNCTGCCGGACTGCCGACTGCCGACTGCCGGACTGCCGGACTGCCGATCTGCCGACTGCCGACTGCCGAC  
TGCCGATCTGCCGACTGCCGGACTGCCGGNCTGCCGACTGCCGACTGCCGGGACTGCCGATCTGCCGGGA  
CTGCCGACCTGCCGATCTGCCGGGACTGCCGGACTGCCGACTGCCGGACTGCCGGACTGCCGATCTGCCG  
GACTGCCGGGACTGCCGATCTGCCGACTGCCGGACTGCCGACCTGCCGGACTGCCGACTGCCGGNCTGCC  
GACTGCCGACCGCCGGNCTGCCGGCTGCCGACCGCCGATCTGCCGACTGCCGATCTGCCGATCTGCCGAC  
TGCCGGACTGCCGATCTGCCGGACTGCCGACTGCCGGACTGCCGACTGCCGATCTGCCGACTGCCGGACT  
GCCGATCTGCCGACTGCCGGACTGCCGACTGCCGATCTGCCGGACTGCCGACTGCCGGGACTGCCGATCT  
GCCGACTGCCGACTGCCGGACCTGCCGACTGCCGGACTGCCGGACTGCCGGACTGCCGATCTGCCGGACT  
GCCGGACTGCCGATCTGCCGACTGCCGGACCGCCGACTGCCGACTGCCGACTGCCGACTGCCGGNCTGCC  
GACTGCCGGGACTGCCGGACTGCCGATCTGCCGACCTGCCGACCTGCCGGACTGCCGACTGCCGATCTGC  
CGATCTGCCGACTGCCGATCTGCCGGACTGCCGGGACTGCCGGACTGCCGACCGCCGACTGCCGGACTGC  
CGATCTGCCGATCTGCCGACTGCCGACTGCCGACTGCCGATCTGCCGGACTGCCGGGCTGCCGACTGCCG  
ATCTGCCGACTGCCGATCTGCCGACTGCCGACTGCCGGACTGCCGACTGCCGGACCGGCCGATCTGCCGA  
CTGCCGGACTGCCGGGNCTGCCGATCTGCCGACCTGCCGGACTGCCGGNCTGCCGACTGCCGATCTGCCG  
ATCTGCCGGACTGCCGACTGCCGACTGCCGACCGCCGACTGCCGGNCTGCCGATCTGCCGGGACTGCCGG  
GACTGCCGATCTGCCGACTGCCGACTGCCGATCTGCCGGNCTGCCGGCCGCGGATCTGCCGACTGCCGAC  
TGCCGGACTGCCGGGACTGCCGACTGCCGATCTGCCGGACTGCCGACTGCCGGGACTGCCGANCTGCCGG  
ACTGCCGACTGCCGACTGCCGATCTGCCGGACTGCCGATCTGCCGGNCTGCCGGGACTGCCGGACTGCCG  
ACTGCCGACTGCCGACTGCCGGGACTGCCGGGACTGCCGACCTGCCGACTGCCGACTGCCGACTGCCGGA  
CTGCCGACCTGCCGACTGCCGGACTGCCGACTGCCGATCTGCCGGACTGCCGGACTGCCGACCTGCCGAT  
CTGCCGATCTGCCGACCTGCCGGNCTGCCGACCTGCCGATCTGCCGGGACTGCCGATCTGCCGACCTGCCG  
GACTGCCGACTGCCGANCTGCCGACTGCCGGGACTGCCGANCTGGCCGGACTGCCGACTGCCGATCTGCC  
GGACTGCCGATCTGCCGGACTGCCGACTGCCGANCTGCCGATCTGCCGGACTGCCGACTGCCGACTGCCG  
ATCTGCCGGGACTGCCGATCTGCCGGACTGCCGACTGCCGGACCTGCCGATCTGCCGGNCTGCCGATCTG  
CCGGACTGCCGATCTGCCGACTGCCGGGACTGCCGATCTGCCGACTGCCGGACTGCCGATCTGCCGGACT  
GCCGATCTGCCGGACTGCCGATCCGCCGACTGCCGATCTGCCGACTGCGACTGCCGACTGCCGATCTGCC  
GGGACTGCCGGACTGCCGATCTGCCGGACTGCCGGGACTGCCGATCTGCCGGGACTGCCGANCTGCCGGA  
CTGCCGATCTGCCGACCGCCGGACTGCCGACTGCCGGGACTGCCGATCTGCCGGACTGCCGACTGCCGAC  
TGCCGGNCTGCCGACTGCCGGACTGCCGGGACTGCCGGACTGCCGGNCTGCCGGNCTGCCGGACTGCCGA  
CTGCCGATCTGCCGGACTGCCGATCTGCCGACTGCCGGGACCGCCGATCTGCCGACTGCCGGACTGCCGG  
GTCTGCCGACTGCCGACTGCCGGACTGCCGATCTGCCGGACTGCCGGACTGCCGACTGCCGATCTGCCGA  
NCTGCCGACTGCCGGGACTGCCGACCTGCCGACTGCCGGACTGCCGACCTGCCGGCTGCCGATCTGCCGG  
ACTGCCGGGACTGCCGATCTGCCGGACTGCCGGNCTGCCGGNCTGCCGACTGCCGATCTGCCGATCTGCC  
GATCTGCCGACTGCCGGACTGCCGATCTGCCGATCTGCCGACTGCCGACTGCCGGNCTGCCGACTGCCGA  
TCTGCCGACTGCCGGACTGCCGGACTGCCGGACTGCCGGACTGCCGATCTGCCGACTGCCGGACTGCCGG  
ACTGCCGACTGCCGACTGCCGATCTGCCGACCTGCCGGACTGCCGACCGCCGGACTGCCGACTGCCGACT  
GCCGATCTGCCGATCTGCCGGGACTGCCGANCTGCCGATCTGCCGGATCTGCCGATCTGCCGGACTGCCG  
GATCTGCCGACTGCCGACTGCCGGGACTGCCGACTGCCGATCTGCCGGNCTGCCGATCTGCCGATCTGCC  
GGACTGCCGATCTGCCGGACTGCCGACTGCCGATCTGCCGGACTGCCGACCTGCCGGACTGCCGATCTGC  
CGGACTGCCGATCTGCCGGACTGCCGACTGCCGACCTGCCGACCTGCCGACTGCCGATCTGCCGACTGCC  
GGACTGCCGATCTGCCGACTGCCGGNCTGCCGGGATCTGCCGGACTGCCGGACTGCCGATCTGCCGACCT  
GCCGGACTGCCGACTGCCGATCTGCCGGGACTGCCGACTGCCGATCTGCCGACTGCCGGGACTGCCGATC  
TGCCGATCTGCCGGACTGCCGATCTGCCGATCTGCCGACTGCCGATCTGCCGATCTGCCGGACTGCCGATC  
TGCCGACCTGCCGGGACTGCCGACTGCCGACTGCCGATCTGCCGGACTGCCGACTGCCGACCTGCCGACC  
TGCCGACTGCCGGATCTGCCGATCTGCCGGACTGCCGACTGCCGATCTGCCGGACTGCCGGGACTGCCGG  
CCGTGATCTGCCGACTGCCGGGACTGCCGACTGCCGGACTGCCGACTGCCGACTGCCGACTGCCGATCT  
GCCGGACTGCCGATCTGCCGGGCTGCCGATCTGCCGGACTGCCGACTGCCGACTGCCGGGACTGCCGACT  
GCCGGACTGCCGATCTGCCGGACTGCCGGACTGCCGACCGCCGGTCTGCCGACTGCCGGACCGCCGATCT  
GCCGATCTGCCGACTGCCGANCTGCCGACTGCCGATCTGCCGGACTGCCGGACTGCCGATCTGCCGGGNC  
TGCCGGACTGCCGACTGCCGACTGCCGATCTGCCGACTGCCGGTGACTGCCGANCTGCCGGACTGCCGAC  
CTGCCGANCTGCCGGACTGCCGATCTGCCGATCTGCCGGGACTGCCGATCTGCCGGACTGCCGGACTGCC  
GACCGATCTGCCGACTGCCGGGATCTGCCGGACTGCCGATCTGCTCGATCTGCCGGACTGCCGACCGCCG  
ACTGCCGGACTGCCGATCTGCCGGACTGCCGATCTGCCGACTGCCGGGACTGCCGATCTGCCGACTGCCG  
ATCTGCCGACTGCCGGACTGCCGATCTGCCGGNCTGCCGGGACTGCCGACTGCCGACTGCCGATCTGCCG



TAGCCACCCGGAGAGTGGTGAAGGCACGTGCGCGCTTCCGCAGACGCAGGATTACCAGGCGCCAGGTTCGT  
CGAAGCGGTGAGACGGGAGGAGAGTATAGACCCACGAGTATTTCGCCGAAGTGGAGGTCGCTGGAGCCAA  
AATGAAAGGGTTGCTGGACACGGGGGCCTCAGTCAGTCTGTTGGGACAAGGATGCCGGGAGTTAGTGGA  
GAAACTGGGATGGGAAGCGCGGCCATACGAATCGATGGTGAGGACAGCGGCGGGTGCCAATCGCCCAAT  
TTTAGGTCGCGTTGTTCTGCCTGTGAAATACGGGAATAGAACGGAAGATATCGTATTTTACATGTGCCCGG  
ACCTGCGACAGGAACTATACCTGGGAATCGACTTCTGGCGAGCCTTTGAGATCGCACCAGAGCTGCTCGG  
TCCGGCCAGAAAGTCCGAAACACCACCAGAGGCATCTGAGGTAACGGTAGCGAACCCAGAGGTGGCTTA  
TTACCGGGACGACGACGACTGCGTAACGGATCCGGAAATGTGGGACCTGGACAACGATCAGAGGAGTCA  
GTTGGAAGCGTGAAGCGCAGATTTCTCCAATTTGAGAAGGATGGCCTAGGGGAAAACCTCACCTGCTGCAG  
CACCGAATTCAGCTGATCGAGGGGAGCAGAACCCGTGAAAGACAGACATTATCCGCTGTCCCCGGCCAAAC  
AGGAGATCGTGTGGGCCGAGGTGGATAAGATGCTAAAGTTGGGCATCATCGAGGAGAGCGACAGCCCCCT  
GGAGCAACCGGACGACGGTGGTGATGAGGCCTGGGAAGAACAGGTTTTGCTTAGACGCCAGGAAATTA  
ACAGTGTAACGGTAAAAGACGCGTACCCGCTTCCATGCATCGAGGGCATCCTATCGCGAATCGACGAGAC  
TCATTTTATCTCTAGCGTCGACCTTAAGTTCGCGTTCTGGCAAATAGAGATGGAGGAGAAGAGCAGGGCG  
TATACGGCGTTTACCGTACCAGGGAGGCCGCTGTACCAGTTCCGCCACATGCCATTTCGGGCTCTGCAACGC  
CGCTCAACAGCTTTGCAGGCTCATGGACAAGGTAATCCCGGCGAATCTGAGGTCCAACGTATTCGTATAC  
CTGGACGACTTGCTGATAATATCGGCAGATTTTCCAACGCACCTTAAAATACTTGGAATTGGTGGCCGAGTG  
TCTGAGGAACGCGAACCTCACCATAGGCATGGCGAAGTCGAAATTCTGCTTCCGCAACCTAAACTACCTG  
GGTTTCATCATAGGCGGCGGGACGCTGCGCATGGATCCGGGAAGGGTAGAAGCGATCCGGAACATCCCG  
AATCCGAGGACGGTCAAGGAACTACGAAGCTTCTTAGGTACGGCGGGGTGGTACCGCCGATTCTATAAAGA  
ATTCGCCGAGATATCGGTACCGTTGACTGATGCCCTTAAGAAGAGAACGGGTAGATTTGTGTTGAGCGA  
CGAGGCCATAGAAGCCATAGAGAGCTTAAAGTTAGCCCTCACCACAGCCCCGGTGTTAGTTCACGCAGAT  
TTTCGAAGACCATTCTTCATCCAATGCGACGCATCTCACTACGGAGTAGGAGCCGTGTTGTTCCAGCTAGA  
CGACGAACAACAGGAAAGGCCGATCGCATTCTTCTCGGCCAAACTCAACAAGCACCAGATCAACTATTCG  
GTGACCGAGAAGGAATGCCTAGCCGCCAAACTGGCCATACATCGATTCCGGCCGTACGTGGAGATGATGC  
CGTTCACGGTAATCACCGATCATGCGAGTCTGCAGTGGCTTATGAGTCTCAAAGACTTGAGCGGGAGATT  
AGCCAGGTGGTCCCTCGAACTGCAAGCGTTCCTTTCTCCATGCAGTACCGCAAGGGAGCCGACAACGTC  
GTCGCAGACACATTGTCCCGAAGCGTGGAAGAGGTGCAACTGACCCCGGAAGATCTGTTGGGATTTTCA  
CCCCGGAGTTCGAGAGCACCGAATATCGAGAGCTGATAAGAGAGGTGATGAGCCAACAAGGGAAGTTGC  
CGGACCTTAGAGTGCAGGACGGACTTCTGTTCAAGAGGACCGTGCACGAGAGCTTGAGAGGATGAGGTG  
AAGGCACAAGTTGGAAGCTCTGGGTGCCGGAGTCGCTGACGGCAGGACTCATCCAACAAGCACACGCGG  
ACGAGACGTCAGCTCATGGAGGCATGAGGAAAACGCTGCACGCGCTGCGCAGGCGATATTATTGGCCCA  
ACATGGCCATACAAGTCAGGGACTATGTTTCGGAATGCGATACATGCAAGGAGACCAAGGCACAGAACT  
ACCGAATGCAGGTCCGAATTGGGGAAGAAGTGCGCACCGACCGCCCCCTTCCAGAAGCTATATATCGACTT  
CTTGGGGAAGTATCCACGGTCGAAACGAGGGCATGCGTGGATATTCGTGTCGTAGACCACTTCTCGAAG  
TTTACCTTCCTGAAGGCCATGAGGGAAGCCACCGCGGCGGATGTGCTGAACTTCCTAGTGCATGAGGTGT  
TCTTCAAATTTGGCGTGCCGGAAGTGATCCATTTCGGATAATGGACGACAATTCGTGTCAAAGTCGTTTCGAT  
GCGATGGTCCAGGCGTTTGGCATTACTCACCTGCGCACACCAGTGTATTTCGCTCAGAGCAACGCCGCCG  
AACGCGTGAACCGCACAGTGCTGTCGGCAATCCGAACCTACCTGGGTGAGGATCATCGGGAATGGGACGC  
GTACCTACCAGAGGTGGAAGTGGCGATCCGGAATGCGGTCCACAGCGCTACGGGAGTCACTCCGTTCTTC  
GCGGTCTTTGGACAGCAGATGTACCTGAATGGTTCCAGTTACAAACTGGCCAGGAAGCTGAGATCATTGG  
CCGACCACAGTATTTCTGACCTTGACGCAAAGGACAGACTGGCTGTAATCCGAAGCCAAGTCAAGGACCA  
CCTGCACACCGCATACGAGCGAAGTCGCCAACGGTACGACCACCGCGCGACAGCTCCATCTGGAACCG  
GGACAGGAAGTGTGGAGGCGCAACTTCGCACTAAGCAGCTTCGGCAAAGCCTTCAATGCCAAGTTCGCCC  
GGAAGTTCTTGAAGAGCCGCGTCGTCCGAGCCGTGGGAACCAACGCCTACGAGTTGGAAGATCTCCAGGG  
ACGCGTGCTAGGCGTCTTCCACGCAAAAGATATACGAACATAATCGTAATTTGCTCACCTCCTTGCCAGGC  
AACGGCGGCGGCAGCGCCAGTCCCCCTTTTTTTTTTGGGTGAGCAAAAAAAAAAATATAGATTACTTGTGCT  
GGGTGTGGCCTACGTTGGGCATCGTTATTAGCCGGCTGGGTCAATCCATGAAATGCGCACGCAGATTCCTT  
GTAAGTGTCTTCATGTGCTTACAATAATCTGCGTGGTGATGTTGCATTTGACGTTATCGGCAGCACCGAG  
GGTTACTCAGTTGGTTGCGTGCGATATTATCGGCCACGCCGATATCTTTTTTGGCATATGGTTCGGAGTATGC  
GGGGTGAAGCTGGGCCCACGGCGGAGCCCAAAATTTTGAAGGGTGGCAACGCCAGACATGCGATCCACG  
GCGCCAAAAGCGACGATTGCTATTGGCCGCCCGTTTCGCTCTTAAAGGGAATACGAGGAGAGTGGATCGC  
ATGCCCTTGGATATGCCCTTGGCCTTCATTTGGGCCGTTGACCCAAAAAATGCAGCTGTGCAGATGAGCA  
GCAACGGTGCCCGCCTCGCAAATGTATGCGTGTGCCGAAATTCGGCACCGATGGTGTGGCTGCCAAAAAT

GTCGAGGAGTTCGATTTGTTTCAGCGGTTAACGGCGGGCGTGCCAGCTCGAAGTGAGCAAAAAAGTTGGAC  
ATTGCATTTCTGCTTGACAGAGTAAAATTTTTTCCCTTCTGAAAAATTAAGCCGGCACATAATACCAATGG  
CTTAACAGACGAATAAAAGTTTTGTTTTGTGTTCTTTGCCATGTAATAAATTTATATAAATCAAACCGCTC  
GAATCACAAAGAAAATATAATAAAAAAATTAAGAGAGACTTAAAAATTTAAGTGCGACGAGAGACGAAC  
CAAATAAGCCAAAAATTAACGGCTCCGGCACCAAGGAGACCAGCTCGCGCACCCAGAGAGGCCACGAAA  
TATTCAGGCCAGGATTCAGTGCAGCGGCGCAAACCAGCCATATCCGCGACGCCGCCAGCAAGCGTCGGC  
GCAAACGTGAAGGCGACGAGACGAGCCACCAACGACCGGGCTCCAACAACGAAGAAGCGGCCACAGGC  
GAGACCCCGCCACATCCACCGAGTGAGTCCGTTCCATTGTTTTGCCCATCCTCGTTTCGAGCCCCTGGCAG  
AGTCAGAAGAAGACTCCTAATTGCACTCCCTGAAAAGGAGTAGATTTTTTTTTTATCGTTAAATTTGGTTAA  
TTTGTATTTATAAAATATATTCATACATACATAGGCACTTACGCCGAGCTTCACTTTAGAGTGCGAACGGT  
GAGGAAAACCTCCAACGGTGATGCATCTGCGCCTGTAAAATATAAAAAAAAAAANCTAAAATTAACCTCTTG  
CGCGAACTATGCTCACATACTTACCTAATTTGAATTTACGCATTTATATCGCCCCCTTACCACCCCCAGAGA  
GCTCTTTAGGTAGGGTAAGGTAGAATTAAGCGATTTAATACATACAATACACAATACGTGACATACCCAG  
TTTTAAGTAATTGTGCGGGCCATTGTTCTAAATCGGGGCAACGATTGCCTCTAAAGTGCCTCATTGCGCG  
TTTCTTTTGCGGCGACTAGCAATATCCTTGTAAGTGTTCGTCGCTGTTCCATTCAAGTGTGTAATAAATA  
AAAAAAATTAATTCTATAAGATAAGAGAAAAATTTAGGAATTAATGCGCTGTGTCAATTAGTATAAATAT  
ATGCAGCAGTAATACGCACCTGTGAAGTTAATGAATTATCCGCTTGCATGAGATCCTAAACAGCTGCAAG  
ATAAATGCCATAAGCAATGATTATGATTGTTATACATTTTAAGAAAACGCAACCAATTATACGCACCTATT  
GAAAGAAATCATGTCCGGCTAAAATAATATTGCTGGGGAGAGTGGGCATTATGGCCGACACGGGCTAATA  
TAGGCCATTTGGTGGCCAAAATGAGGGAGACGAGTGGAGGTGATCGTCTCATGGTAGGGCGGGTACGCTG  
GGTCCGGAACCGGGGCCCCGATCTGGAAGAGTAAGGTGGATAAATAGTGTTTTTTTGTTAATTTATATTGAG  
TGTCTTACCTTTGTTGTTTACATTTTCATAGTTGTTACAGCTGTGTATTTTGTTCATGAGTTAGTAGTTCCGA  
ATATTTGTTATCGATTATGCGGTTTATTTTGTAGTAGTGTGTGTGAGTCTGTTTTGCTACAGACGTGTAGCT  
TTGTTGTTATCGATTGTGCGGACTGCGGGCCAGGGATGGGACCACACCCAGAGAATCCGATGAGCCAGCC  
GGCGCGGCCCACTGAGAAACAAGCAGTTCGGTAACA

>160\_rnd-1\_family-273\_\_LTR\_\_Pao

TTGTTGAAAGGTCCAGATACACTAGCATCTTTGATGGGGGTGCTAATACGCTTCCGAGAGCGTCCTATCGC  
AGTATCCGGCGACATAAGGGAAATGTTTCATCAAGTCAAGGTGCGCCTAGAAGACCAACCGGCACAGAA  
GTTTCTCTGGCGTGATGGAGATTCGTCACGCTTCCCCGAAACATACGTTATGCAAGTCATGACGTTTGGAG  
CATCCTGCTCGCCAGCTCTAGCAAATTACGTCGAGAATCGCAATGCCGAGCGGTTTGTAGCGGAGCATCC  
GGATGCCGTAAAGGCGATTTGCGAAAACACATTTGTCGACGACTGGCTGCAGTCGGTGGATACTGGAGCT  
GAAACGATACAGTTAGCCGAGACTGTAAAAAGGATTCATGCTAGTGGCGGCTTCGAGATGCGCCGCTGGA  
CATCAAATTCGAAGCAAGTTATACAGGCGCTGGAAGACGACTGTGAGGAGTTGGACAAGCGTATCAGCG  
CTCAGGATGAAGCGCAAGAGAAGGTCTTAGGCCTGTGGTGGCTACCTGGACAAGATCTGTTGACGTTTGT  
GGTGACGCCGAACCTTGCTCGCGAAGGCATCTAAGGAGCGCCCAACTAAAAGACGTGTTCTGAGTGTGATC  
ATGTCTATTTTCGACCCGCTCGGGCTGCTAGGATTCTTTAATATACGCGCTAAGATCATCCTTCAGAACAT  
ATGGCGATCCAATATCGGATGGGATGACGACCTCACCAACGAAGACGAAGCCGATTGGCAACACTGGCTT  
GATCTAGTTTCAAATTTGAATGCCGTCCGCATTCCACGGTGCATGAAGTGGGTGAGCCGAACCCAGGCTG  
TGCAGATGCATACATTCGTTGACGCCAGTATGAATGCTTACGCCGAGTTGTATTTTTGCGGGCTGAACTT  
GATGGCCAAGTACATTGCAGTTTGGTCGCCTCGAAAACGAGAGTAGCACCCCTAAAGCCCGTGTCCATAC  
CTCGAATGGAACCTGATGGCCGCGGTCTTAGGTCTGAGACTGGCCAAATGTATCCAAAAGGAAATGTCCGT  
ACGNATACATAGACGAACATTCTGGACAGATTCAAAGGATGTGCTCTACTGGATCCGTTCCGATGCTCGA  
AAGTTCCAGCAATTCGTAGCGCTTCGGATAGGAGAGATTTTAGAAGAATCAGATGTGGACAGCTGGCGAT  
GGGTACCATCGGCTCAAAACGTGGCAGACGATGGTACGAAATGGACTAAAACGCCTGAAATTCATGGCTC  
AACCAGGTGGTTCAATGGACCACCATTTTTGTATCTAGAAGAATCGCAGTGGCCACAATCGGAAATAGGC  
CCTGCATTAAACATGTTGTACCATGCTGAAGAACAACCCAATCACACGTCGTCCTGGAGATGTATTCTGCC  
GGATCTGCAGCGTTTCAGCAAGCTAGAAAAATTGAGAGCCGTACAGCTATGCGTACTGGATTTCTACGG  
AATATTACTAAGAAGGTCAGATTGGACGGAGGACTGGATCTGCAGAAGACGCTGCTCCTTAAAAGAAGC  
AATGAAATGGATGTGATTTTTATCCGGATTTGTCAAGAAGAGGAGTTTTATAGTGAGATCACCTGCTTAAG  
GTCGGGGCGCCGCTTAACCGATCGCAAAGCTTGCTGTTTAAGTGCTCCCCTTATGTGGATGACTCGGGCA  
TTCTACGTATTAAAGGACGGATAGACAATATAGAAGGAGTCGAAGTCTGCGTAAAACGCCCGATAATTCT  
GCCAAGACGACATCAATTGACGTATCTGCTGGTTGAGTTTTATCACCGCAGATATCATCACCTACACAACG  
AAATCGTCGTAAATGAACTGCGGCAGCGGTACTGGGTTTGTGGCTTACGAGCTTTGGTGAGAGAAGTTTC  
CAATACCTGCCAGCGTGCCGCATACGACGCGCCCGCCAAAGCCGCCAGGGATGGGCGACCTGCCAATC

GAACGATTATCGCCCTATACTCCACCGTTCACATATACTGGAGTGGATTACTTCGGCCCCCTACGACATTGT  
CGTTGGACGGCGTCGCGAGAAGCGCTGGGGCGTGCTATTTACATGCCTCACGGGTGCGCGCCGTTACCTA  
GATATAGCTACGTCGCTCTCAACTGACTCATACTTATGCGTTCTGAAGTCGTTCTGTGGCCAGACGCGGCTG  
CCCCCGCCGCATGCTGTCGGACAATGGCACAAATTTTCAGAGGCGCTAGCAGAGTATTAAGATGAAATT  
GAACGTATATCGCCGGCTCTGATCGAGCGACAGTACCCAGAAGTTCGAGTTTACCTTTATCCCGCCAGGATC  
ACCCACATGGGAGGATCGTGGGAACGAATGGTGGCGCTCTACAAAGTCAATACTGTGCGGAAATTCTGCCG  
CCCTCTGGGTTACGAGAGGAGGTGCTACGAGCAGCATTGGCTGACGTAGAAAGCGTGCTCAACTCAAGGC  
CACTCACTTATGTTCCCTTGGAGACATCTGAGTCCGAAGCCCTGACTCCAAATCATTTTCTTATAGGTCATT  
CAAGCGGATTGCGTGAGAGAGGATTACGGGAGCAAGGCGGAGCTAGCTTGGCACGAGGCTTCCGAGTCG  
CCAGTCAATTGGCTGACCAATTTTGGAAAGAGATGGCTGCGCGAGTATCTGCCTACACTACCAGACGTAC  
TAAGTGGTTTCAACCGCCACTCGAACCAATATCAGTCGACGACATCGTCATAATAGTGGACGACGGTGCC  
AAGCGAACTGTTGGACAAGAGGAGTGGTCGTAGACGTGCACCGTTCAAAGGATGGCCAGGTCCGAAGT  
GCCGTGGTGCGAACCGCCGATGGAATTATTACTCGCCCCCGCGTCAAGCTAGCTAAGCTTGACATTAAAG  
TTGGTAACACACTGCACGGACGTTTCGTGAATTACGGGGTGGGGAATGTTACGGGGGCGAAGTGAAAATAGC  
TGTTGACTAAGTCCTACTGGGTCTCGCATTTTTTCTGTAAAGCAGCCCTCGCTGCTTACACTGGAAGCGCAC  
CGTTAGAATTAGTTTTTACATGATAAGTCGATCGCACGCAGCTGCACAAGCTGCATTTTCGTGAGGTTCA  
TTTTCGTTTTGTGCTTGCAGCTGAGCAGAAGAGTGAAAGAGAACAGAAGCGCGTGCGGAGCACGAATGTA  
AGTCTCATAANCNTGTAAAATATAGGTCGTTAAATAATGAAAGAATAATAAAGATTTTCAGCCGTTTCAAT  
CGTATCGTATCGTACCGCCTACGAATCGAATCGAATCGAGTTGTTTCTTTCGACGCTAGAAGTCCCTGCCG  
AATACGCGCCCCGGCGCGAGTCTCGGCGCCAACATTCTGAAATATTCTCTGCNGCAGAGAGTGTCCGAGG  
TATTCTCTGCTACGGCGGAGATTTCTGCGAAGCAAGCGACTTGCAAAGTCACAACCTGAGCTGCCTATAG  
AGAGACCTGGTCAAGAGCTAGACTCACACGTAGCTGCCATAACCTCAAAGCGGACTTCACGGTATCGGTG  
TGGCGAGATGGCTGACGGTGATGAACAAGATGCAAGTGCGAGAAGGACGACAAGTAGTAATCAACCCGG  
TGGAAGTGAACGCTTGTAACGGCATGGTCAACGGGACAGGCTGACGGATCGCCTGTCCCTGCTGGAGTT  
CAAGATAAAGTCGCCGGCGTAGAAAAGGGTAGCGGAGCAGCAAACATAGAAATTTATAGCGGCTGTCCG  
TCTACGTCGTCCGCAGCTACTGGTCCAAGGGAAAGTTCAACACCGACGCAGCAAAGAACTGAGAAAGAG  
GGAGCATTCTTCGACCCTTTGGGATACCAGAACGTGATCTGCAAGCAGAAACAGGTTGCGGCTAATTGGA  
GTGTACACCCAGTTTGCCATATCAAGCAAACACGGCGGGTGTTTAACAGGCTACGGAGCCCAGTACTG  
CCGCGTACATGGGCCACACAGGTCTGGGAGCGCTCAATAGATCGATAGAGCACGCGCCGCGGCAGCAATT  
CGATAATGTACATTGTAATGNTGCGACGCCGTGGAATGGACCGCTGACATCTGCGCAAATCAGCGCGCGA  
CACGTNATCAGCAAAGATTTACCAATNTTTACNGGCAAACCAGAGGAATGGTTGATCTTTATCAGCAATT  
ATGAGCAATCCACAGAGAGATGTGGATTACGCAACGAGGAAAATCTCATCCGGCTTCAGAAGTGCCTCAG  
AGGGCAAGCCCTGGATGCGGTGCGCGGAAAGCTTATGATNCCAGCTACAGTGCCGTATGCTATAGGCACA  
TTGCGAATGCTGTATGGCCGCTCTGAAATAGTACATGCTGCGCTGCAGCAAAGCTCCGAGAGGAACCAG  
CAATAAAGTCGGACAACCTGAACACCGTTATCCGACTGGCCCTAGCTGTCCAAAACCTACTGCGCAACGAT  
AGCGGCCATTGGTATGCACGAATATCTTTACGATCCCGCGCTGCTGAACGAGCTTGTTGCTAAGATGCCCA  
GCAATATGAAATTGGACTGGGGCCGNCATCGAATGTGCAATGANGGTAGCAGTTTGGCCACCTTTGATAA  
CTGGCTGTTCAATGTGGCNATGTGCGCCACTATGGTTCACGCCCTACGAGACACCACGGGCTGATAACGAA  
AAGAAGAGCTCCACGAAAACCACTAGAGAGCGAATTTTTGTGCACAACACGGTAGATAACCCTGAGGGTT  
CGCAGCAACAGCGTTATCAACAGGAACAGGAGAGAGTTTCATGTGCGAAGTGCGCCGGTAACCACCGTCT  
ATCAGATTGCGACGACTTCAGAGCCATGGGTACAAAACAGCGGTGGGAACTTGTTAAGGAAAAGCGGCT  
CTGCTTTTGCTGCTTTATGCGACATCGTGCACAACAGTGTAACAAAGAAAGAGTGTACGTGGATGGT  
TGCGAGTCAACGCACCATGTGCTGCTGCATACGCCTACCACGAGCGGTAGTAAAGTCGAGCACACGGGCC  
AAGGTAGCAACCACCGGATTAAGGCAAGTGAGTCTGCCGTTATGTTTCACGGCAGCTCCGCAAGTAAGAC  
ACTGTTTCGATATGTTCCAATCACGCTCTATAGTAAATCAAAAAGCGTGCGCGCATATGCATTAGTGGATG  
AAGGAGCTGAGTGTACGCTAATAGAAAGAGCGCTTGACAGACGAGCTGGAAGTATAGTGGTCCGGCGACCC  
AGCTGTGTCTTAAATGGACAGGGGACATAACCAAGAACGAACCTGAGTCGATGTCCGTGGCTGTGAGCAT  
TTCAGCTCCAGAACATAACGCGATACAGTATGCNTTAAAAAACGTGCGAACNGTAGCGAACTTGACTTA  
CCAGAGCAAAGTATCGGGCCACAGTTGCTCAAGTCTCGGAAGTACTTATCTACGCTTCCCATTCTGCCGTA  
TAACAACGTAAAGGCTCAGCTTATTATCGGCTTGGACAACATCAAAATAACTGCACCCCTGGAGATACGA  
GAAGGTGAAAACGACGACGTCATAGCAGCGCGAAGCAGACTAGGATGGGCCGTATATGGCCGCCCATG  
GTGGGTGAAAGCACACGCCTCGTCTGCTACATATTTGCCAGTGCAAGTGCGGCGCGTGGGATGGATGAGG  
CTCTGAAGAACTATTTTGCCCTGGAGTCGCTAGGTGTGAGCGTCTCCTCAAATCCGCTGAGATCCAAAGAG  
GACGAACGCTCGATGCAGATAATGGAGGCAACAACACCTATCTGGAAGACGAAAAGCGCTGGCAGACC

GGCCTGTTATGGNGGTTTCGATCGCATTACATGCCAGACTCTTACCAGATGGCGGTTAAGCGCCTGAAAT  
GTCTAGAGGCCAAAGATGTCNAAAGACCCACCACTGAAGGAGTTCATGATGAACACGATGCACGACTACA  
AACAGAAGGGATATATCCGCCGGCTGAAGGATAGTGAGTTAGTAGCTAACACGACGTCGTGGTTTCTTCC  
TATCTTTACAGTCACCAATCCGAACAAGCAAAAGACGCGCTTGTTTGGGATGCGGGCCGCCAAAGTTAGT  
GGCACGTCGCTGAACGATTGTTTGTCTGAAAGGCCCAGATACACTAGCATCTTTGATGGGCGTGCTAATAC  
GCTTCCGAGAGCGCCCTATCGCCGTATCCGGCGACATACGGGAAATGTTTCATCAGGTCAAGGTGCGCCG  
AGAAGACCAACCGGCNCAGAAGTTTCTCTGGCGTGATGGAGATTTCGTCACGCTCCCCCGAAACGTACGTT  
ATGCAAGTCATGACGTTTCGGAGCATCCTGTTCCGCCAGCCCTAGCAAATTACGTCAAGAATCGCAATGCCG  
AGCGGTTTCGTAGCGGAGCATCCGGATGCCGTAAAGGCGATTGTCGAAAACACATTTGTAGACGACTGGCT  
GCAGTCGGTAGATGCAGAATCCGAAATGATGCAGTTAGCTGAGACTGTAAAAAGGATTCATGCTAGTGGC  
GGCTTCGAGATGCGCCACTGGACATCAAATTCGAAGCAAGTTATGCAGGCGCTGGAAGACGACTGTGAGG  
GCTTGGACAAGCGTATCAGCGCTCAGGATGAAGCGCAAGAAAAGGTCCTGGGCCTGTGGTGGCTACCTGG  
ACAAGATCTGTTGACGTTTGTGGTGAAGCCGAACCTTGCTCGCGAAAGCATCTAAGGAGCGCCCAACTAAA  
AGACGCGTTCTGAGCGTGGTCATGTCTATTTTCGACCCGCTCGGGCTGCTAGGATTCTTTAATATACGCGC  
TAAGATCATCCTTCAGAACATATGGCGATCCAACATCGGATGGGATGACGACCTTACCAAAGAAGACGAA  
GCGGATTGGCGACACTGGCTAGATCTAGTTTCAAAGTTGAATACCGTCCGCATTCCACGGTGCATGAAGT  
GGGTGAGCCGAACCCAGGCTGTGCAGATGCATACATTTCGTTGACGCCAGTATGAATGCTTACGCCGCAGT  
TGTATTTTTGCGGGCTGAACTTGATGGCCAAGTACATTGCAGTTTGGTCGCCTCGAAAACGAGAGTAGCAC  
CCCTAAAGCCCGTGTCCATACCTCGNATGGAAGTATGGCCGCGGTCTTAGGTCTGAGACTGGCCAAATG  
TATCCAAAAGGAAATGTCGGTACGCATACATAGACGAACATTCTGGACAGATTCAAAGGACGTGCTCTAC  
TGGATCCGNTCCGATGCTCGAAAGTTCCAGCAATTCGTAGCGCTTCGCATCGGAAAGATTTTAGAAGAAT  
CAGATGTGGACAGCTGGCGCTGGGTCCCATCAGCTCAAACCGTGGCAGACGATGGCACGAAATGGACCA  
AAACGCCCCGAAATTCACGGCTCAACCAGGTGGTTCAATGGACCACCATTTTTGTATCTAGAAGAATCGCA  
GTGGCCACAACAGGAAATGGCCCTGCAATAAACATGTTGTACCATGCTGAAGAACAANCCAATCACACGT  
CNTCCTGGAGATGTATCCTGCCGGATCTGCAGCGCTTCAGCAAGCTGGAGAAATTGAGAGCCGTACAGCT  
ATGCGTACTGGATTTCTACGGAATATTACTAAGAAGGTCAGATTGGACGGAGGACCGGATNCGCAGAAG  
ACGCTGCTCCTTAAAAGAAGCAATGAAATGGATGTGATTTTTATCCGGATTTGTCAAGAAGAGGAGTTTT  
ATAGTGAGATCACCTNCTTAAGGTCGGGGCGCCGCCTAACCGATCGCAAAAGCTTGCTNNTCAAGCGCTC  
CCCTTATGTGGATGACTCGGGCATTCTACGTATTAAGGGACGGATAGACAGTATAGAAGGAGTCGAAGTC  
TGCGTAAACGCCCCGATAATTCTGCCAAGACGACATCGATTGACGTATCTGCTNGTTGAGTTTTATCACCG  
CAGATATCATCACCTGCACAACGAAATCGTCGTAAATGAACTGCGNCAGCGGTACTGGGTTTGTGGCTTG  
CGAGCTTTGGTGAGAGAAGTCTCCAGTACCTGCCAGCGTGCCGCATACGACGCGCCCGCCCAAAGCCGC  
CAGGGATGGGCGACCTGCCAATCGAACGATTATCGCCCTATACTCCACCGTTCACATATACTGGAGTGGA  
TTACTTCGGNCCCTACGACATTGTCTGTTGGACGGCGTCGTGAGAAGCGCTGGGGCGTGCTGTTACATGCC  
TCACGGTACGCGCCGTTACCTAGATATAGCCACGTCGCTCTCAACTGACTCATACTTATGCGTTCTGAAG  
TCGTTTCGTGGCCAGACGCGGCTGCCCCCGCCGCATGCTGTGCGACAATGGCACAAATTTAGAGGGCGCTA  
GCAGAGTATTAAGAGATGAAATTGAACGTATATCGCCGGCTCTGATCGAGCGACAGTACCCGGAAGTNGA  
GCTTACCTTTATCCCGCCAGGATCACCCACATGGGAGGATCGTGGAACGAATGGTGCGCTCTACAAAG  
TCAATACTGTGCGAGATTCTGCCGCACTCTGGGCTACGAGAGGAGGTGCTACGAGCAGCATTGGCAGACG  
TAGAAAGCGTGCTCAACTCAAGGCCGCTCACTTATGTTCCCTTGGAGACATCTGAGTCCGAAGCCCTGACT  
CCGAACCATTTTCTTATAGGTCATTCAAGCGGATTGCGTGAGAGAGGNTCACGGGAGCGGGGCGCAGCTA  
GCTTGGCACGAGGCTTCCGAGTCGCCAGCCAATTGGCTGACCAATTTTGAAGAGATGGCTGAGCGAGTA  
TCTGCCTACACTACCGAGACGTACTAAGTGGTTTCAACCGCCANTCGAACCAATATCAGTCGACGACATC  
GTCATAATAGTGGACGACGGTGCCAAGCGAAACTGTTGGACAAGAGGAGTGGTCGTNGACGTGCACCGTT  
CGAAGGATGGCCAGGTCCGAAGCGCCGTGGTGCGAACCGCCGATGGAATTATTACTCGCCCCCGCCGTCAA  
GCTAGCTAAGCTTGACATTAAAGTTGGTAACACACTGCACGGACGTTTCGTGAATTACGGGGTGGGGAATG  
TTACG

>9\_rnd-1\_family-274\_\_LTR\_\_Pao

CTTCACTCTTGACCCTGCATCATGGAACATTCCGTCAAACATACAAGTCTGATCCTGAATTCTTCAAAT  
CTCAGCAAATCGACATGTTGATCGGAGCCAGTCTGTTTTTCGATCTGCTCTGCGTTGGCCAGATAAAACCA  
GCTGCTGGACTGCCGATANTGCGAAAGACTCGCTTTGGTTGGGTCGCGACTGGAGGCGCTGCACATGCAG  
GAAATCATCGCTCGTGGCTAGGCGATTAGNGATGAATCCAGATCTGCTGGTAGACTCGCATCTGCAGAC  
GAATGCACAGATTGACGAATTAATCCGTTCGGTTTTGGGAGCTGGAATCTTGACCGAGCCGGAGTCATCA  
CCGAACAGGGGGGAGCGTGACTGCGAGGCACACTTTCAGGCCAATTTTAAGCGTCTGCCGACTGGCGAGT

ATTCAGTTCGCTTACCGCTTCGNCTAAGCCTGGATCAGCTGGGTGACTCCTATCAACAGGCGCTTCGCCGA  
TTTCTTAATTTAGAAAGGAACTAGACCGCAACCCAACTTTGAAAACCCAGTATGCAGCATTTATCAAGG  
AATATCTTGACTTAAATCATATGTCACCTGTTAGCTTAGCTGCACTGGGCCAATGCAAATACTATCTGCCA  
CATCACTGCGTGCTGAAGGAGGATAGTACTACAACCAAGCTAAGGGTTCGTGTTTGATGGATCAGCAGCTA  
CTACCTCTGGACACTCGCTGAATGATGCACTGATGGCAGGTCCTACCATCCAACCGAAACTGTTTTTCGATA  
CTGATGCGTTTTTCGTACATTTCGCAGTCGCCCTCACAGGCGACATATGCAAAATGTATCGATGCGTACGAGT  
CGAACCAGCAGACAGCTATCTTCAATGTATCCTGTGGCGTGATTCTCAGCATCAGAAGATACAGACTTAC  
AAATTAGACACCGTCACCTACGGCACAAAACCAGCATCGTTTTCTCTCAGTGCGGGCTATGCACCAACTGG  
CCATGGATGAGCAGCAGGCATTTCTTATTGGCGCTGACATTATTAAGGGGATTCTACGTGGATGATCTC  
ATCTCTGGTGGTAGCTGTGTTTCAAGGAGCAGTCGAGATATTGAAGCAAACGTCTGGACTACTCGCCAAGG  
GCAACTTTAAGCTGCGAAAATGGTGTCTAGCGACGCTACTGTACTCCAAAGCATACCGGAAGAGGATAG  
AGAATCGCTGCTTAAGTTCAACGATGGCAGCGATATCACGAAAACGTTAGGCCTCGTTTGGGATCCCGCC  
TCAGACTGTTTTCTTTTTTTTTTCTCCACTGAGGCTACCTCGAGACTGACAAAACGATCAATCCTCTCC  
TCAATTGCTCGTTTTTACGACCCCTTGGTCTTGTGTTGNCCTGTAATAACAAAATCTAAAATTTTTATGCAG  
GATCTCTGGAGAGAAAAACTGGACTGGGATGAGAGCTTGCCTGTACACTTAAGCACAGCCTGGGTCAACT  
TCTGCGCTGATTTTGAGCAGACTCAGCAATTCCAGTATCCNCGTCTGTCAGTCTCATCAGACAGCACAGTT  
GAGATTCACGGATTTTGTGATGCCAGCCTGAGCGCTTATGGAGCATGCGTCTATACAGTTTCAAGGTGCCA  
TGGCAACACAAGCGTACGTCTCTTGTGTTCCAAGTCGCGTGTGCGCCTGTGAAAACCATCACTGTACCAA  
AGCTGGAACCTCTGCGGAGCTGCATTATTGGCTGAACTTCTCAGCGAAATCTGCCAACTGAAAGTGTTTAA  
TGTCGTTATTACTGTTGGTCAGACTCTGCTGTAGTTTTGGCTTGGATTCGCAATGATGCTTCCAAATTCAAT  
ATTTTCGTTGCCAATCGGGTCGCAGCCATCCAAGAGCTCACCCTGGCATGGAATGGCATCATATTCCCAC  
TGAATTAAGCCCGGCGGATATAATTTACGAGGAGCGCTGCCCAGTGAGCTTTCAGGTCCCCGTTATGG  
GCCCATGGCCCGAGCTTCTCAGAAAGGAAAAGGAAGAGTGGCCTGCCTCCTGTGTACCTGTGCAATCCT  
TGCCAGAACTCCGACACAAGGTATTACTCGGAACTGCAGCGCAACTTGATCTGTCAATTGGCTGCAAGTT  
CATCAACTCGTTCTCCAAGCTGCAACGCGTCTTTGCTTACATTTACAAGTTTGTAATCGAATCCGAGGAT  
CTGAGGTAACCTGTAAGCCACGTGCATCATGGCACACATCTGTTGCTGCGGTGAGTGCAAATGGCTACTCTT  
GGCGATGACTACAAGGCACTGATGGAAGGAAGGCCCGTCAAACGGTCTAGCTCAATGGCTTCTCTCGCGC  
CATTCCTTGACGACTTCGGCTTACTCCGCATCGGTGGACGGCTGAAAAATTCGTCTGTTGGACTTCTCAGCG  
CGACATCCGATTATATTGCCTCGCCAGCATCCTGTGACCCGAGCAATAATAATCCACTTTCATAAACGGAA  
TTTACATGCTGGACCTCGCGCCGTATTGGCTTCGATTTCGGCTCCAATACTGGCCCATTGGCGGTTCGTA  
CAGTCTCTAGCATTGTTGCCAAATGCACAATCTGTTTTCTGTGCCAAGCCACGATTGGCAGAGCATATAATG  
GCAGATCTACCAGCTGATCGTCTCGACACATCGTATCCTTTTATGGTCACTGGCGTTGATTACTGTGGACC  
ATTCTTCTACAAAAGCGAAGTCCGCAACAGGCCTCCCGTGAAATGCTACATTAGCCTGTTTCATATGCTTCG  
CTACAAAGGCAGTACACTTAGAACTTGTAAGGATTTGTCTACAATATCGTTTCTAAACGCCCTAAAACG  
GTTTCATCCTGACTCGCACTCGACCTTCAAGGATCTGGTCTGACAATGCGACAACTTCGTAGGCGCTAAGA  
ATGAGCTGGCAGATCTGAGCCGCCTGTTCTGAGTGACGAGCATGTCAAAGCTGTTTACGAGTTTTGCCTA  
TCCGATTCAATTGAATGGTCGTTTCATCCCTCCTCGCTCTCCACACTTTGGCGGGCTATGGGAAGCCGCTGT  
GAAGACTGCGAAGCACCATTTTTATCGCTCTGTGCGGCCCTTCCATCTTGGACTTCGATTTCGCTGCGCACGC  
TCGTCTGCCACATCACGGCAATTATTAATTCTCGTCCATTACTTCCACTTTCAGAGCATCCCGATGATCTTG  
ACGTCTTGACACCCGCACACTTCTGCGGTACAGCGCCATCTTCGTACATATTGAGCCTGATCTAAGGAAG  
CTTAATTTCAATCGGCTTAGCTATTTTCAGCGCGTCACATACCTCCAACAAGTATTTTGGGCCCCGTTGGCG  
CGAAGAGTATTTAACGCTTCTTCAACAGCGCTCCAAATGGCGCACTCCTCAGCCAGGACTTTCATCAACG  
ATGTCGTCTTGTAAAGGATGAGAACCTACCGCCGCTGAAGTGGCCATTAGCTAGAGTTCTAGAGCTGAT  
CTCGGGATCTGATGGGGTATCTAGAGTTGCAGTGCTTTCAGACTGCGACTGGAGTCATACGCAGAGCCGTA  
CGAAAGCTGTGTTTGCTGCCAAAACAGGATGATGTTGAAAGTCCCTTGCCCTTCCAACGGGGGAGGATTGT  
TTGGTCAAGTGACCGGTAGAGATAACAGCGACGGCTGCGTGCAGTAACAGCAGAAGACAATAANCATAA  
TTACAGCTTAAGAGCAAATGATGTTTGCTCTTTGTAAGTTGCTGCCTACTCTCTTCATCGGCCCTTTGCCTC  
CTGCATTGACGCCCCGCTGCCCATCGTTCTGAGCGGAGCTCAATTTTCGTTTCGTTTTGCATATAGTTTTAGTTTT  
TCGTTTGATCGCAAGCAAGGCACAACCTATTTTCGAGTTGACTGCCGAGCAATATTATAACATTTTCGTAAATT  
ATAATAAGTGCCCTGTGCGGTAAATAAATACATTTCGAAACAAAATATAAACTTCGAATTTTCGTTGCACA  
CAAAGCAGTGCTAATTAATTAGTTGCAAAAAGGCTTGTAACCTACACATTTTGGGTGACCCCGACGTGATTT  
TTTTTTTTTTTCGTTTCCCTTCTGTTTCGCATTTTGTTTTATAATTTTCATTTTATAATTTTCATTGCGCATATTTA  
CAAAAGGTTGTGCGTTAAGTGCTGCGAGCCTCAACATAAAGTGATCAATTTAACCAAGTCTCTCTAATAA  
CTGTACTTAACCGCNTGCTTGTGCATATGCATACAGTTTGTCTGTTGTACATAGACGCCGTAGNAAAATCGC

CGTTAATCGTTGCGCGCTTTAACCGGCTATACGCTATCTCGCTCGAACAACACTTGTGCGCGCAAATTTT  
GTATTGTAGTTCGGCTGTGTGAACTTTGTGTGCGCTACATTAACAATGTTTGATGAAGGTGCAAGTGCAA  
ATGAAAATGAGGCGACATCTGCTAATCAAGTGGCGGTTGGAACACAGGCTGCAGTTCCTAAAGTAAAGAT  
TAAGAAATTAAGTGATCGAGTCAATAGATTGTCTCTGAACTTGATCCCGCGCGACTTCGCGATGTTGATG  
ACTACGAGCTGCAAGATTACATATGCATGGCATCTGACTTGCAGGCGAAATTTGAAACAATCTATGATAG  
TTTGTGTTGGATGTGAGTCAGGCCAGCGTTGAAGAGGATCTTCAGTCAAGCTTTGAGTCAACCATTAGGCGG  
CTACGAGTGTCCCTTCAACGCGAGCGCGGAAATCGAAGCAAGATTACAGCAGACTCCACATTGCTCCACTT  
TCAATTCCGCCGCGAGCCGATGATCCGCGCTCTACTTTTGTGTTTCCAAACCACTCTCGATTGCCTCAACTTA  
AATTGCCGGAGTTTAGTGAGGCTACACAGAATGGTCTGACTTCTCGAATATGTTTACCACGGTCATTGAT  
AAGGATCCGTATTTGACCAACATTGAAAACTTCAGCATCTACGGTCATGCCTCAAAGGAACAGCGCTGG  
ATACAATTCGCTCGTTGGAAATGTCAAACGCTAATTATGCTGCCGCCTTAGAACTGCTTGATAAGCGTTTT  
AATAACAAGCGTCTTGTTTTTTCAGGCACATATTGCTGAAATTTTGGGTTTAAGAAAGGTGGATAAAGGGTGC  
GACGACACAACCTGCGCGAATTCTCAGATAAGGTCAACTCTCATTTACGTGCGTTAAAATCGATGGGCGAGT  
GTGGAACAGATCGCCGGCTGCATCATAGTACACACACTGCTGCAAAAACCTAGATAGCGCCACGCAAGCTA  
GCTGGGAGGATGATGCGCCGTTGGACGTCATACCATCATGTGAGCGGCTTACAGCTTTCATTGAGAAGCG  
TTGTCAAAGGCTGGAAAATGCGGATCACGCGACGGCAATGTACACGCCTGGCTCCAGGTGGGCCAGAAC  
AACAGTAGNAGAAGAACGTTTGTGGTGACCAAGAATGGAACATATGCATGTGTATTTTGTGAAGCCGCAG  
GCCACTCCATTTATAAATGTCTGCAATTCGCAAAATTATCGCCCTCGCTGCGCCTTCATGAAGCCAAACGG  
CTTGCGCTGTGCCTTAATTGCCTGCAAAGGGGACATCAGCTGAGAGTCTGCGGTTCCAGCACTTGCAGAGT  
CTGTGGAAGCAAACATCATAGCCTGTTGCATCTTGGCAACACAAGCAGTCACAGCGTTGCTTCTAGCTCAC  
ACAATGTTCAAGAAGCCGAACTTATACGTCACTCTCAAAACATCCTGGCGGCAACTTCATCGTCGACACT  
CTCCATCGACCAGCATCTTAAGCACGATGTCGTCCTACTTGCCACTGCCGTCATCAATGTAAAAAATCGCG  
CTGGCTCCTTGGTGCCCTGCCGTGCGTTGCTCGACTCTGGGTGCGAATTGCACATCATCACCTCTCGTCTTG  
CTCATCAGCTCCAGCTGCGCAAATTCAAGTCCACAGCAGTCGTCTCTGGCATTGGTGATGCAGCGTTTTCG  
TCAGATGGTTTTTCGGTAAACATCAATGTCCAATCTCGAGTGTCTGAATACTCCACATGCATCCCGGCATT  
GATTGCACCATCCATCACCGATAATCAGCCTGGCTTCACTCTTGACCCTGCATCATGGAACATTCCGTCAA  
ACATACAACTAGCTGATCCTGAATTCTTCAAATCTCAGCAAATCGACATGTTGATCGGAGCCAGTCTGTTT  
TTCGATCTGCTCTGCGTTGGCCAGATCAAACCTAGCTGCTGGACTGCCGATACTGCAAAAGACTCGCTTTGG  
TTGGGTGCGGACTGGAGGTGCTCCACATGCAGGAAAATCATCGCTCGTGGCTAGGCGATTAGTGATGAAT  
CCAGATCTGCTGGTAGACTCGCATCTGCAGACGAATGCACAGATTGACGAATTAATCCGTGCGTTTTGGG  
AGCTGGAATCTTGCAACCGAGCCTGAGTCATCACCAAACAGGGAGGAGCGTGAAGTGCAGGACACTTTCA  
GGCCAATTTTAAGCGTCTGCCGACTGGCGAGTATTCAGTTCGCTTACCGCTTCGACTAAGCCTGGATCAGC  
TGGGTGACTCCTATCAACAGGCGCTTCGCCGATTCTTAAATTTAGAAAGGAACTAGACCGCAATCCAAC  
TTTGAAAACCCAGTATGCAGCATTATCAAGGAATATCTTGACTTAAATCATATGTCACTTGTAGCTTAG  
CTGCACTGGGCCAATGCAAATACTATCTGCCACATCACTGCGTGCTGAAGGAGGATAGTACTACAACCAA  
GCTAAGGGTTCGTGTTTGATGGATCAGCAGCTACTACCTCTGGACACTCGCTGAATGATGCACTGATGGCA  
GGTCTTACCATCCAACCGAACTGTTTTTCGATACTGATGCGTTTTTCGTACATTTCGCAGTCGCCCTCACAGG  
CGACATATGCAAAATGTATCGATGCGTACGAGTCGAACCAGCAGACAGCTATCTTCAATGTATCCTGTGG  
CGTGATTCTCAGCATCAGAAGATACAGACTTACAAATTAGACACCGTCACCTACGGCACAAAACCAGCAT  
CGTTTCTCTCAGTGCGGGCTATGCACCAACTGGCCATGGATGAGCAGAAGGCATTTCTTATTGGCGCTGAC  
ATTATTAAGGGATTCTACGTGGATGATCTCATCTCTGGTGGTAGCTGTGTTTCAAGGAAGCAGTCGAGAT  
ATTGAAGCAAACGTCTGGACTACTCGCCAAGGGCAACTTTAAGCTGCGAAAATGGTGTTCTAGCGACGCT  
ACTGTACTCCAAAGCATACCGGAAGAGGATAGAGAATCGCTGCTTAAGTTCAACGATGGCAGCGATATCA  
CGAAAACGTTAGGCCTCGTTTGGGATCCCGCCTCAGACTGTTTTCTTTTTCTTTTTCTCCACTGAGGCTAC  
CCTCGAGACTGACAAAACGATCAATCCTCTCCTCAATTGCTCGTTTTTACGACCCCTTGGTCTTGTGGTC  
CTGTAATAACAAAATCTAAAATTTCTATGCAGGATCTCTGGAGAGAAAACTGGACTGGGATGAGAGCTT  
GCCTGTACACTTAAGCACAGCCTGGGTCAACTTCTGCGCTGATTTTGAGCAGACTCAGCAATTCCAGTATC  
CCCGTCGTGCACTCTCATCAGACAGCACAGTTGAGATTCACGGATTTTGTGATGCCAGCCTGAGCGCTTAT  
GGGGCATGCGTCTATACAGTTTCAAAGTGCCATGGCAACACAAGCGTACGTCTCTTGTGTTCCAAGTCGCG  
TGTCGCGCCTGTGAAAACCATCACTGTACCAAAGCTGGAACCTCTGCGGAGCTGCATTATTGGCTGAACTTC  
TCAGCGAAATCTGCCAACTGAAAGTGTTTAACTGTCGTTATTACTGTTGGTCAGACTCTGCTGTAGTTTTG  
GCTTGGATTTCGCAATGATGCTTCCAAATTCATATTTTCGTTGCCAATCGGGTCGCAGCCATCCAAGAGCT  
CACCCTGGCATGGAATGGCATCATATCCCCTGAATTAAGCCCGGCGGATATAATTTACGAGGAGCG  
CTGCCAGTGAGCTTTCAGGTCTCCGTTATGGGCCCATGGCCCGAGCTTCTCAGAAAGGAAAAGAAAG



AGTGGCCTGCCTCCTGTGTACCTGTGCAATCCTTGCCAGAACTCCGACACAAGGTATTACTCGGAACCTGCA  
GCGCAACTTTGATCTCTCGATTGGCTGCAAGTTCATCAACTCGTTCTCCAAGCTGCAACGCGTCTTTTGCTTA  
CATTTACAAGTTTGTAATCGAATCCGAGGATCTGAGGTAAGTGTAAAGCCACGTGCGTCATGGCACACAT  
CTGTTGCTGCGGTCAAGTGNAAATGGCTACTCTTAGGGATGACTNCAAGGCACTGATGGAAGGAAGGCCCG  
TCAAACGGTCTAGCTCAATGGCCTCTCTCGCGCCATTCTTTGACGACTTCGGCTTACTCCGCATCGGTGGA  
CGGCTGAAAAAATTCGTGCTTGGACTTCTCAGCGCGACATCCGATTATATTGCCTCGCCAGCATCCTGTGA  
CCCGAGCAATAATAATCCACTTTCATAAACGGAATTTACATGCTGGACCTCGCGCCGTATTGGCTTCGATT  
CGGCTCCAATACTGGCCCATTTGGCGGTTCGTAACAGTCTCTAGTATTGTTGCCAAATGCACAATCTGTTT  
TCGTGCCAAGCCACGATTGGCAGAGCACATAATGGCAGATCTACCAGCTGATCGTCTCGACACATCGTAT  
CCTTTTATGGTCACTGGCGTTGATTACTGTGGACCATTCTTCTACAAGAGCGAAGTCCGCAACAGGCCTCC  
CGTGAAATGCTACATTAGCCTGTTTCATATGCTTCGCTACAAAAGGCAGTACACTTAGAACTTGTAAGGAT  
TTGTCTCCANTATCGTTTCTAAACGCCCTAAAACGGTTCATCCTGACTCGCACTCGACCTTCAAGGATCTG  
GTCTGACAATGCGACAACTTCGTAGGCGCTAAAGAATGAGCTGGCAGATCTGGAGCCGCGCTGTTCTCTG  
>9\_rnd-6\_family-1051\_\_LTR\_\_Gypsy  
TTCACAGTAGAATACCTAAAGGGGAAAGATAATTTTCGTAGCAGACGCGCTTTCGCGTATTAATATNAAAG  
GAACTCAAANATATGCAACATAAAGTCCTGAAAGTCACTACCAGGGCGACAAAGTAGACAAAAANAAAAAC  
TGTACAGTAGAAAAATTATGAACTTCTGCCAAGGCAAAGTCATAAAAAATGTATCCAAGCCCAACGTACAT  
GAAGTCATTACAAATGATGAAGTACGAAAAGTAGTGACCTTGCGCATAACAGAATCTAAATGTTTATTTA  
AACATGGAAATAAAATTATCGCAAGAATTGNAGTTAGCGATTTATATACCAATGGAATTCTCGACCTAGG  
TCAGTTCTTCCAAAGGCTCAAAGAAGCGGCCGGTATATTAATAATCAGCCAACTCAAGGTGGCACCGAGC  
GAAAAANATCTTTGAATCAGTTTCAATAGATTCTTTTAAAAATATGGGCAATAAAATATTAATAATCTTTAA  
GAGTAGCGCTACTCCANCCGGTGACCCAAATAAAAGATGGAAAAGAGATACAACAAATATTGTCTACAT  
ACCATGACGACCCCAATTCAAGGAGGTCANAGCGGCATAACAAGAACGTTAGCGAAAAATAAAAAGACACT  
ACTACTGGAAAAATATGACACGTCATATAAAACGNANGTACGTGTCAAAAAATGCTAAATGTCTAAAGCA  
AAGACGCACACAAAAACTCTTCTGANTCGCACAGAAACACCTGTGAATGCTTTCGATATAGTGATAGTGG  
ATACAGTTGGTCCGCTACCCAAATCGGAAAAATGGTAATGAATACATAGTCACATTAATATGCGACCTTA  
CAAAATATTTAGTAGCCATTCCAAAAAAGCAAAAGCGCAAATAATGTGCAAAAGCTATATTCGAAAAT  
TTCATACTCAAGTTTGGTCCAATGAAGACGTTTCATCTCGGACATGGGAACAGAGTATAAAAACCAGATTT  
TAACTGACTTATGCAAGTATTTGAAGATCAAGAATCTCACCTCTACTGCATATCATCATCAAACATTAGGG  
ACAATAGAACGAAGTCATCGAACTTTTAATGAATACATTCGTTTCATACATCTCTGCAGACAAATCTGATTG  
GGATGTCTGGGTTCAATATTTCACTTATTGCTTCAACACGACACCATCAGCAACGCATGAGTATTGTCCAT  
ACGAACTAGTATTTGGCAGACTACCGGAAACAGTTCATAGATTTAAACAAAACATAATTACATAGATCCTA  
TTTATAATTTAGATGACTATTCTAAGGAAATAAAGTTTAGATTAGAAATAGCATACAAAGGAGCTAGAAT  
TATGTTAGAAAAGCTAAGGCTTATAGGAAATTAGCATATGACGAGAAAAACAAAAAACTTGAATTAATA  
GTAGGANATAAAGTACTTATAAGANATGAAACAGGGCACAAATTAGACCCAGTATATTTAGGACCATATA  
TAGTAGAGAAAAATAGAAAATAATGACAACATTTTTTTTATTAAAGATAGTAAAGATAAAAAAACAAAAAG  
TTCATAGGAATAGATTAACAATTTTTTAATTCTTAATAAAATAAAATAAAAAAATATATGACGACCTGATC  
AACCGAATGAAAAAATTTTTTACAAATAAACGAATTATAAATTTTTTATACCCTAAATAATTTTTTGTATTTTT  
ATACTCCAACATTTAAGATTTCTTATTATATAAAAAAAATTTTTCAATTTTTTTATAAAAAACAAACCCACAA  
TAATTAAGTTTCAATTAATAACTACACATTCATAATGTTACGTTATTTCTCTAAAAGGGAGGTGTAGTGCCT  
ATATGCCCTTACAGAATACCCCGTACTTAAACATAAAGTATGCAGCACTTTGTTGCATACAATAACAATAA  
TATAGTAAACGAGCCCAGAGCCACATTATGTATTGGCTCGGTCTCATATTACGCAGCGCGGTTCACTAGCC  
TCACTAGCTGACCGTTTATGCTTATGATGCATATCCCACGCTCCGTCTGAGCGCATTCCGTGAGCAATATA  
TATGCTCACTAATACAGGCATATGCGAGCTACTCACTCTCCCTCTCTTTGTAGCTGTTAACGAATAACAGC  
ATAAGTATATATGTATATCCATAGGCTAAGCGAACATTATAACAAGTGAATAAATTCATTCTGAACAAAG  
ATACAAAACAGCACTGACGTGCTGACTTNTTTTTTCATTGACAATAAGTGCTCATTTTACATGGCGACCGTG  
ACTTGGTCACGCATCCCTGCCTGGAGGAAGTAGACCAAGTGAAAAGGAACTTTTCATGGCCAACAAAGAG  
GCCATGTATAATATACAATTTGAAAAAGGAACTTCATGGCCAACAAAGAGGCCATGTATAATATCCAAGT  
GAAAAAGGAACTTCATGATCAACGAGAGGCATCCCGTATTCTGAGTGAGTAGAGAGTGAGTGTTATGGTT  
CATAAACGCGGTGGCTTAAAAAATAAATTAATAAAAGAATAGCGCACCTAAGGTGGCTGCTATACACAA  
AACAGCCAACACCCGCATGGTCGACAGCTCAGAAGTTACAAAATGAGCTCGACTATCTGCAAAATGAAAT  
TAAGCAGAGAAAACCAAACACCACTACTCACTCAAATATAAAAGTTCTAATAAACCAAACAACTAATAA  
AGTTACACCCATTGACGCAACCAGCCTACCAAAAGAAAAACGAATGTGCCCACAGGATTGCGAAGGCC  
ACTCGACAGCCCCTTCTGCGAATATACGTGCAGACACTGCACAGCCAGCACCTCCAAACATTACATTACA

ACCAACAAATAAACACCTGTGCGAAGACCAGCACCGGTACCGCCAGCGCAACAAGCTGTGCCATCGGAA  
TAAGTGCGAGAGGCACACCGCCACTTGCGCATAACGAGGGAGCATCAGCGTGCCACATCCGGCGACGCCC  
AGCTGATGCAACGATGAACAACAGTTGCGAGCTATATCCTTAACTACTTTTAATTAAATATAAAAAAATTTT  
TGTA AAAATTGAGCGGAAACACTTCCGCCCCGATTAGCAGCATAGCCCGTAAAGCTATGCGAAATGCTAGGG  
TAGTATTTTGTGTTATAAGAAATATTGAAACCTTGATTCTAAAAACCCAAGTCAACCAGCACTAACGTGCT  
TTTGTGAAATCATTATTAATCCAAACATTACCAACATATTAAATTAATAGTAATAATAAACTTAAAA  
ATTGTAATGCCCCGACGACAATTGAGTCGACCGGCAAGACGTTTGGCCAGTACAGCCATTTCGAAACAATAG  
GTAGGAAAAATACAGATTGTAAAAAAAATTTTTTAGATGCGTTTTTAAGCAGAAAAACAACAAGCAAAAC  
AAAACCCGACTTGTA AAAACAATAAAAGCATCAAATTCATAAATATAGTAATAAAACCTCAAATGAACG  
ATACAAACAACAACCTTGTCCTTGTA AAAAGTAAACAAAAACAATTTAACATTACGCATTTGTAAATTTTTTA  
AGATAATTCCTAAGACCTCAAATGAACGATACAAACAACAATATATGAATATTAATATCAAAAAGAGG  
AAATTA AAAAGTTATAATTCGTTTCAGTTTGTACATTAGGTAATTCAAAATTATGATCAAGAATTAGCATGA  
TTAAGGACAAGATTAAACAAGGTATATAACGACTATACAGACTTTTCGTATGCGAGCCATACAAATTTTGCA  
AAGGCATAGAGAATTCATACCAGTATATGAGTTCGAATACGAATATATAGAAACATTTCGGCACAGTGACA  
AGTCCACTCTATTCATGTTCTAAAATAGAGAGCGGAATAATCTTGTCACACTACCCTACGTCAAAAATAAA  
AACAAATTATTGACGAGCATCCGATTCTAGGGCAGACAACAATTGTTTTAGTACGTCTGCATAGGTAGTAGT  
CAAATCAAAAAGCAAGAATATTTATATAGGAATATGGGGGGAAAAGAATCAAAGGCAGATGATAACACT  
GCCAATGTAGTTAACGTAGTAGAAGTCGTAGACACCACTCCCCATGTGCAGTTAACAAACATACTGCTAA  
TAATACTCATTGTAATAGCTTCAGTAGACATCCTTCTGAAGATTTATCTTCTTCATAAAAANCACTGAGGA  
AGCGTTACATGAGTCGAGCCAACGACTTAGACAAGGTCTAAGCCACTGCTTAAATAAAAATATTTAAGTAG  
CGGAAGCTTACATGGACTGGTCCCAAATAGTAGAAAAGATAAAGCGGCATAGGGAAAATTTTCGATAAAT  
CATACAAGTGCTTAATAAAAAGCGCACCAAGTTTAAAGACCCACCATAATTA AACATACTGAGATCCTTGT  
ATATGAGTACAATGAAATCAGGAGTCTAGTTACCGAGTGTCAAAAATAAACTGACAAGTTTACACAGAGTC  
CAAACCTTCAGACGTTTTACAGCGTCTAAGGGATAATCTGGTAAACTTAAATAAAAAGTATGATCTCCAGC  
TTTATCTTCCATCGGTGTTAAATACACCGGTAACATTTGATAAGTCACTACTGACAAACGACCAAATAGAA  
GATACAAAATTAGTAAACATGGCACAAACAGTTGTAGAATTTATCAAGCTAGCCACATCTCTGATACCAG  
AGTTTGACGGTAAGCCGGAAAATCTACAAAGTTTTCTAGATTCTTTGAATCTATTAGAAACCTTAAAAGGC  
ACACATGAGCTAACGGCCATAAGCCTTATAAAAACAAAGCTAAAAGGCCATGCGAGAAATTTGATAAGT  
AATGAGCAGACAATTGCTGCAATCATTACGCAACTATCAAATGCAGTAAAAGGAGAATCGGTAGAAGTTG  
TATCTGCTAAGCTTCTTAATTTGCAACAGAAAAATAAAACGGCTAACCAATACACCCAAGAGGTGAAAAA  
ACTGACAAAGGCCCTTGAAGGCGCCTATATCAGTGAAGGTCTAAGCCAATCACTTGCAAACAATAACAGC  
ACTACAACAGCTGTAAAAAGCTATGACCCAAAATTGTTTCGATTGATAAGGTAAAACCTTATCATGCAGGCA  
GGCACATTCACAAATATGAATGATGCCGTATCCAAATTTGTCAATAGCTGCACGGAGATAACAGGTCAA  
GTAACACTGTCCTGTATTATCAACGAGGTGCAAACAATAATAATAGAGGAGGCCGAGGTTATAATCGTGG  
CAGAAATTACAACCACAACAATTATAACCGAGGCGGTAACAACAATAACAATAATTACAATAACCGTGG  
AGGAAGACGAGGCCAAAATAGAGGAAGAGGCCGAGGTAACCTCAACCAAGGTTATAATAGTAACAATGT  
GAGAATGGCGCAAAAATACGCCGGAAAACCTCTCAGAACCCTTTAGGAAACAACCAGTAAATGTAAAGGTT  
CATTCATCAATTACAGTCTTAATATATTTGTCACTTTTATAATCATTCAACTGAAAATAAACTCACATTCC  
TAATAGATACTGGTGCAGATATCTCACTTTTAAAAATAAATTCAGACAATTTCAAAATTCAAGAAGAAAA  
AATTATAAACATCCAAGGCATAGGCCAAGGTGTAATAAAATCTCAAGGAACAACGTCAATAGAACTTCAA  
TACACAAAATATATTATTCACACGAATTTCAATTTAGTAGATTCTGATTTTTCAATACCGTGTGATGGAAT  
AATAGGCATTGATTTTATTAAAAAATTCAATTGTCAATTAGATTTCAAACCAAGTGAAGACTGGTTTATAA  
TTAGACCTCAAAATTTAAATTATCCAATTCATGTTCCGATAACATATAGTGCTGGCAACAACAGTTCTC  
TTGCCAGCCAGATCCCAAGTAATTCGAAAAATAGACATTAATACAGTAAATGATTATATATTTGTTCCCTAA  
TCAAGAAATACATAATGGAATTTATGTTGCAAATACAATAGCAGCATCCAAACATGTATACATTCGCCTTC  
TAAACACAACCTAATTTTCGACCAATTGGTCAAAGTAAACAAAATCCAATATGAAAATTTAAAAGATTACGA  
CATTCATAGCACTACTCCAGAAAATAGAAGCGAACAAGTACTTTCAAAATTAAGAAAAAATTTTCCAGAA  
CAATTCAAAAGTCAACTAACAGAATTATGCACCAAGTATAGTGATGTGTTTCGGACTGGAAACCGAACCAA  
TAGCGACAAATAATTTCTATAAACAAACATTAAGACTTAAAGATGATGAACCCATTTATATTAAAAACTA  
CAGAAGCCCGCATAGCCACGTTAAAGAAATTCAAAACAAGTAGGGAAATTAATAAACGACAAAATCGTA  
GAACCGTCTGTATCCGAGTATAACAGCCCACTCTTGTTAGTTCCGAAAAATCATTACCAAATTCGGAAGA  
AAAGAAATGGCGATTAGTAATTGACTATCGCCAAATCAACAAAAACTACTTTCTGATAAATTCGCGCTCC  
CCAGAATTGATGATATTCTAGACCAACTGGGCAGAGCTAAATACTTTTCATGCCTTGACTTAATGTCAGGT  
TTCCACCAAATTGAACTTGAAGAAAATTCAAGAAATATAACATCTTTTTCAACGAGCAATGGCTCATATCG

CTTCACGCGATTACCATTTGGTCTTAAAAATAGCACCAAATTCGTTTCAGAGAATGATGACTATAGCATTCT  
CGGGTTTAGAACCTCCCAGGCATTCCTTTATATGGATGACTTAATGGTGATAGGATGTTCCGAAAACACA  
TGATTAAAACTTAACTGATGTTTTTAATGTATGTAGGAAATATAACCTGAAGTTGCATCCAGAAAAATGT  
TCATTTTTTCATGCATGAAGTGACATTTTTAGGTCACAAATGCACTGACAAAGGAGTATTGCCAGATGACAA  
GAAGTTTGACGTCATCAAAAATTATCCTGTCCCTCATGATGCGGACAGCGCGAGACGATTTGTAGCATTCT  
GCAATTATTATCGTCGTTTTATAAAAAACTTCGCCGATTATTCACGGCACATAACTAGATTATGTAAAAAG  
AATGTTCTTTTTGAATGGTCAAGTGAATGCCAAAACGCATTCCAGTACCTTAAAGAAAAGCTTATGCACCC  
CACATTATTACAATATCCTGATTTTCGCAAAGAATTTTGCATTATAACAGATGCCAGTAAACAAGCTTGCG  
GAGCAGTTCTAACTCAGAACCGTGACGGAATTCAGCTCCCAATAGCTTATGCATCTCGTTTCATTTACAAAG  
GGGAAAGCAATAAGAGCACAACAGAACAAGAGTTAGCGGCAATTCATTGGGCAATTACCCATTTTAGAC  
CATATATTTATGGCAAACATTTTACTATTAAAACGGATCACAGACCATTGACATATCTTTTTTCTATGACTA  
ATCCCAGTTCTAAATTAAGTCGCATGCGGCTAGAGCTTGAAGAATACGACTTCACAGTAGAATACCTAAA  
GGGGAAAGATAATTTTCGTAGCAGACGCACTTTTCGCGTATTAATATAAAGGAACTCAAAGATATGCAACAT  
AAAGTCCTGAAAGTCACTACCAGGCGACAAAGTAGACAAAATAAAAACTGTACAGTAGAAAATTATGAA  
CTTCTGCCAAGGCAAAGTCATAAAAATGTATCCAAGCCCAACGTACATGAAGTCATTACAAATGATGAAG  
TACGAAAAGTAGTGACCTTGCGCATAACAGAATCTAAATGTTTATTTAAACATGGAAATAAAATTATCGC  
AAGAATTGAAGTTAGCGATTTATATACCAATGGAATTCTCGACCTAGGTCAGTTCTTCCAAAGGCTCGAA  
AAAGAGGCCGGTATATTAAAAATCAGCCAACCTCAAGGTGGCACCGAGCGAAAAGATCTTTGAATCAGTTT  
CAATAGATTCTTTTAAAAATATGGGCAATAAAATATTAAAAATCTTTAAGAGTAGCGCTACTCCAGCCGGT  
GACCCAAATAAAAGATGAAAAAGAGATACAACAAATATTGTCTACATACCATGACGACCCAATTCAAGG  
AGGTCATAGCGGCATAACAAGAACGTTAGCGAAAATAAAAAAGACACTACTACTGGAAAAATATGACACG  
TCATATAAAAAGAGTACGTACGTAGATGTCAAAAATGCCAAATGTCTAAAAAAAAGACGCACACAAAAA  
CTCCTCTGACTCGCACAGAAACACCCGTGAATGCTTTCGATATAGTGATAGTGGATACAGTTGGTCCGCTA  
CCCAAATCGGAAAAAATGGTAATGAATACATAGTACATTAATATGCGACCTTACAAAATATTTAGTAGCC  
ATTCCAATAAAAAGCAAAAGCGCAAATAATGTGCAAAAAGCTATATTCGAAAANTTCATACTCAAGTTTG  
GTCCAATGAAGACGTTTCATCTCGGACATGGGAACAGAGTATAAAAACCAGATTTTTTACTGACTTATGCAA  
GTATTTGAAGATCAAGAATCTCACCTCTACTGCATATCATCATCAAACATTAGGGACAATAGAACGAAGT  
CATCGAACTTTTAATGAATACATTTCGTTTCATACATCTCTGCAGACAAATCTGATTGGGATGTCTGGGTTCA  
ATATTTCACTTATTGCTTCAACACGACACCATCAGCAACGCATGAGTATTGTCCATACGAACTAGTATTTG  
GCAGACTACCGAAACAGTTCATAGATTTAAACAAAACCTAATTACATAGATCCTATTTATAATTTAGATGAC  
TATTCTAAGGAAATAAAGCTTTAGATTAGAAATAGCATACAAAAAGAGCTAGAATTATGTTAGAAAAAGC  
TAAGGGCTTATAGGAAATTAGCATATGACGAAAAAANAAAAAACTTTGAATTAAGTAGGAGATAAAG  
TACTTATAAGAAACGAAACAGGGCACAAATTAGACCCAGTATATTTAGGACCATATATAGTAGAGAAAAT  
AGAAAATAATGACAACATTTTTTTATTAAAGATAGTAAAGATAAAAAAACAAAA

>9\_rnd-5\_family-302\_\_Unknown

CTCGCTCTCCGTGGGAGTCTTTAGAGCCATGGGGGAGGAATCCTGGGTTGGACTCGAAAGCTTGGGTGAC  
GAAGCCGTCACCACCGCGTCTCTTCCTCGGACCAGACTTCATCCCGGCCTTCCTGGCGAACCGTGAAGGA  
ACTTTTTCGGGATGGCGCCTTGCCCTTCTTGGCCGAACCAGGCGTCTTCTAACTCCCGCCGGGCGATGGTGT  
CGGGTGTCTCGGCGCGGGCAATAGGCACGAGCGCGGGCATCTCGTCCTCGTCGTCGAGCCACTCCTCCTC  
CGATTCTTAGGAAAGGTTTCGTCTGGCGCCTCGGCGCGGGCTGTGGAAACGGCCGAGTTCCGCCGCGTCC  
TTGGTGCTGAGATGGTGCTCCTCCACGACCATCTGGCAGACCGCAATCGGTATCGGCCAGGGTTCGGGAT  
GCCCTCCTCGAGAAGCGATCTTGCAGCGGCGGTTATCCTTCCCGAGCTGGGGAGGACCCTCCTGGCGCTC  
GCGGGGCGAACGCGGCACGCACCGCTGCGATCCTTCGGGCTTCTCGGTCTCCGTGCGAAGCCTCTTCGTG  
GCCGACGAGGATGCTCCCTCGGGACTGGGTGCGGATGGCCTCCACTCCGGCGACGCTTGCCCCTGGCGG  
CTCTCCGTGCGACGATGGCGGCTGCGTCGGCGCTTTCCGCCGGGGCCTTCTTTGGCACCCCCATTGCGCGCTT  
TGCGGGGTTTCAGACGGGGTTTTGTTGGCTACCGCGGGGACCTTTTGGTAGGTACCGCAGCGTTATCCTGGG  
AAACTGGCTGCCCCGGGTCTACCTCCAGACGGTGGGTGGCAAAGCGGCGACGGAATTCGGGCTCGTCCTCC  
GTTGACGGGTCCCCTCCCCTAAGGGTTCTGGGTGCGAGGCTCAGCGGGTCTGCTTCCCCGTCGTTTGCGCG  
GGATGCCGTTTCGGCACCTCCGTGCGTGGCGACTCCGCGTCTCCGGCCGACGGGGATATCTCTTCTCCTACC  
GCCTCCACGTCTTGCCTGGTGGTGTGTGCTCCTCCGTTCGGAACGGTGCGGACTCTTCTCCTCGTCCATCTCG  
CCGGCCGCGGTTGGGGTTGCCGGCTCTGATGATTGTGCCGAGTGGGATGCGAGGGGCGGAGATGCAGGCT  
CTTCCGCGTACGGTGGCGAGTTCCGGGCGAATGGTGCTCCACGAACATTGTCGTGACCTCGACTGCCATC  
AGCAAGACCATCCCGTCTAGCCTCTCCATTATGCTGGTCCGCCGGGAGAATAGTGTATGGCGGAACTGGC  
GAGGCGGTCTTCTTGCCGTTCTCTTCGATAGTACTCACGCCCTGGCGTGGGTGCGCGGACGGCCTGCG

GCTCCCGGCCCCGGGGAAGGCTCGGTGTCCCCGCTGCTGTTGTCTTCGTCTGACGATATGTCGATAACTTC  
GGGTTCCATCTGAAAGTTCAGCTTATTGGTTAACTTACTCTTTACTTATTTGTTAATGCCCTATTCTCTCAG  
TGCGGCTCACACTTTACTATGCCTATTCTGAATTATGTTGTTAATGTTAGTTTTATCTAAGCTTAATCATAA  
TAGTTTCGTTGGGCGACGGGTGTTGCTCTCATCCTTCGCTTACTCGTGGGCATTTGCGTGCCCTGGATCTTC  
GTCTTCTTCGTGCTCGCTCGTCTTTCTGTAGAATGGTTTCAATTGTGAGATGTTGGCCACCCTCTTCTTGCG  
GTCGTCTGATTTACACAGCCGCACAATATTGGGGATATGAATTTGACGACTTTGTAGGGGGCCGTCAAATTT  
GGGTGCCAACTTTGCGGCGAAAACCTTCGGCAGCGTTGGACAACTGGTGCTGCCTCAACAGGACCATCGA  
GTCCAACGAGGGCCGCCACTCTCGTCTCCGCAAGTTGTAATGCCTGCCCTGGTCCTTTGATGCGTGCTGGA  
GGTTGCTGTGGACGATATCAAAAATTTTTTTTAGCCTATCCGCCTTTGTCTGGGGTTCGAGCGCACTAGTT  
GCGGACCCCGGAGTTACCTGATCGTACAGAGCTGCGGGTAACCGAGGTTCCCTGCCCTGCATCAGGAAAG  
CGGGACTAAAGCCCGTTGAATCTGCCACGCTCGTGTTGACCGCCAGCGAGATCTCGGGCAAGAGTTCATC  
CCATGAACTCTGGTGGCCCTCAATAAATTGCGCTATCATGGTCTTTACAGTCCGGTTAGTCCTCTCAGTGG  
GATTCTCTTGCGGACAGTACGGGGCGGTATACTGGATCTCTACACCCAGGGACCCCAAAAATGACTTGAA  
GCTCCGACTCGTAAATTGTACCCCGTTGTGCGCACACAACTTTCTAGGTACCCCGAACCTACTTAGAATCC  
TCTCTCGAAACGCAGTTTGAGGTGTGCTGCCGTGGCTCTTCTGAGAGGGACCAACTCCACCCATTTTCGAG  
AAAGCGTCATGGAACACCAATAGCATCGTGTTTCCATGTTTCGACCGTGGAAGGGGTCCGACGAAGTCCG  
CGCAAAGTACCGCCATCGGCTCTGCCACCTGCCTCGTCAGCATGCGACCAGCCGGTTTGAGTTGCTCACTC  
TTGAATTTTTGGCAGTCTTCGCAACATTTACGTATCTGGCGGCATCGCGGAACATAACCCGGCCAGTAGTA  
CCGCTGGGCTAACCTCGCCACCGTTTTTCTGACACCTTGATGTCCGGCCGTGGGAGCATCATGACATTCCC  
GCAGTACCCTCTGGCGTTGACCACTGCCTACGCATAGTTTCCAAGGGATGTAGTCCCTCATCGTCTATCCGG  
TGACCCAAATGCCTATATAGCTGTCCGTTTTCTCGGTGTAATCCGGGAACCTTGGCTGGCTCTTCGGCGAT  
TCTAACACGCATCCTCGCGACCCATTTGCAGGGGGGCCTCGGCCACCACTGCTTGTTGACAGGTCTCTAGAG  
GATGCCTCGACAGGGCATCGGCCACGACGTTGAGCTTCCCTCGACGATAATGAACGTCAAATTGGAATTG  
CTGCAGTTCCAATGCCATCGCGCAATCCTTCCTGACGGGCTCTCGATCGAATTCAGCCACTTGAGCGCTA  
GATGGTCCGTTATTACGTGCAATCGGTACCCTTCTAGGTAGCAACGCAACTTCCGGATCGACCACACGATT  
GCCAGGCACTCTTTCTCAGTGGCGGAATAGTTTACCTCGGCCTTCAGCAACTTTCGGCTCGCGTATGCTAT  
CACCCGCTCTTGTCATCGATCGTCTGCGTCAGCACTGCACCGAGGCCATACTCACTCGCGTCAGTCTGCA  
AGACGAACTTGCGGGAAGTCCGGGGCAAGCCAACACAGGGGGCAGTCGTCAAGCTCTCCTTCAATTGAC  
GCAATGCCTCCTCCTGTTCTTGCTCCCATGCCCATTTCTGCCCCTTCTTTAAGAGCGCTGTGAGTGGCTGTA  
CCTGGGTCGCGAAATTGGGTACGAAACGCCTGTACCATGACGCCATCCCGAGACACTGTCGCAGTTCTTT  
GCAATTTGTTGGGGCCCTCAGGTTTCGTATCGCCTCCACTTTCTCCGGATCGGTCCGTATCCCTTCTCCGCA  
AATTACATGTCCTAGGTAGACTAACCTCTCCCGGAAGAAGCTGCATTTTTTTCTATTTAACC GGAGATTGG  
CCGCCCTTAGCCGGCGGAATACCTCCCTCAAATTCTCTACATGCTGTGTTTTCTGTCGCTCCTATTACCACGA  
TGTCGTCTAGGTAAGCGAACGCATGAGGCTCCATCTGCGGCCCTATTACCGTATCCAAAGCGCGCTGGAA  
TGTCGCACACGCCGAGTGTAAGCCGAATGGCATCACCCGCCATTGGAAAAGACCTCTTCCAGGGACTGTG  
AACGCCGTACACTCCCGGCTATCGGCTGCCATCGGTATCTGCCAGTACCCGTGCTTCAAATCCAGAGTGGA  
GATGAACCGGGCGTGCGCAACCGCTCCAGGATGTGGTTAATACGAGGCACCGGATAAGCGTCCGGAAT  
GGAATGCGCGTTGAGTTGTGCGGTAGTCAATGCACATACGCCACTCGCCAGTCTTCTTCTTGACCAAGACGA  
TCGGGGCGCTGTGCGGACTACGCGACGGCTCGATGGCATTGCCCCGGATCAACTCATCCACTTGCTCGTCG  
ATCACCTCTGCATGGCCGGATTCTTGGGGTAGTACCTTTGTTTCAACGGCTTGTCATCCTTCAGCCGGATT  
CGGTGCTCCGCGATGTGCGAGATTCCCTGCAGCCCCCTCGAAGAGAGCCAGCTCTGACTCCAGGAACTCCC  
TCAGTTCTGGGTCCAGACCCGCTGGCCAATCCGCCTCTTCGATGCCGTTATCGCCCCATCCTGGGACCATT  
TCGATTCCAGATAGA ACTCCGTGGCCGCTCGATTCTGGCGATCGCTCCTGGCCTTCTATGTCCGTGTGGAT  
TCTGGTCATCGCTCCTACTCCGTCTTTCTCTTGACGTTCCCGCCGTGCCGCTTCCGTAGCCATTAGAAGT  
CTGCCTCTGCAGCTCTATGCGCCACCTCTTGGGTCTCCAGGCTGTCGATTCCGGGCCGGACTTTACTCCCCT  
TTTCCTGACCTTTTCCGTGCAAGGCCGAGCAGGTACTCCCTTCCCATGACTTGGGAGGCCTGCCTCTGGCT  
CCCTCTGTAGCCGAGCAGGTGCCCCCATCATGACTTGGGAGGCCTTCCCTCCGGCTCCCTCTGTAGCCGAGC  
AGGTGCTCCCTTTCCATGCCTTGGGAGGCCTTCCCTCCGGCTCCCTCTGTAGCCGAGCAGGTGCTCCCTTTTC  
ATGCCTTGGGCGGCCTTCCCTCCGACTCCTCGCTCGTTCCTGGCCTCACGCCCGGTGTCGTGCTGCTTCTAG  
GACCAGTTCCGCCTCGCCGCAGCGTATTGTGGTATTCATCGCCCCCAAAAATCCATAACCAGGATTACAT  
GGTCCAGCATTGAGGGGCATGATGAGCATCGTCATGCTGATCGTTTTTCCCCCTAAGCTGGCGTCTACTCT  
CAAAGCCTTTTCTACCTCTAGGGTGGACCCATCTGCCAGGCGGATACGTGCCTGTATTTCTCCGCTCTTCC  
CCGGATCGTCCATTTGCGTACGCAGTCTCACTCATGAAGCTACGAGTGGCTCCGGTATCGATCGTGGCGG  
GCATCGTTTCGTCCGCCAATCTCTACCGTAGCGACGATCCGGCCACCGTCCACCTTCAGTGGGTGTCCTATT

GCTGCGTTCCGTGTGTATTGGCGCCGACCCGATCCTGGTCCGGACGACGCCGTTGCCCGTTTCCCGTCTCC  
GCGCGGCGGCAACACTCCCGACTACTTCGGCCCCGGCTTCCACATACCCAACAAAATAAGACAGGGGGCGT  
TGGGACATTCCCTGGCAAAATGCCCCCTCCTGTGCGCACCTACGACACGCCCGTTCGCGGATCATATCCGTTT  
CCGGCCTCTTGGCTCATCATCTGATGGGCCACCTCTGCGTGAGTTGCAGCGGGTGGGGTGGAGACCCTGTT  
GTCCACAACGGTTCGTCGCCGATCCGCTGGGAGCAGACCCGGAACGGATTGAGATGTCCCGAGGACTGCGCC  
GTCCTCGCCCACTCTGCACTATTTGAACTAGAGACACCCTGACCCAAGGGTGGCTGCCTGAGTACTCCGC  
CCTCTGCCTCACGACGGTCTCGTATTCTACGGCCAGTTGAGTTAGCTGGGATAGGGTAGAAAAGTCTTGCC  
GTCGCACATAGAGCCTGTATTCCGGAGCGGGCTTCTCGTAGATCCGATGCAGCTCTTGTGCCGGCTCGTAT  
CTAGCGTGGTGCATAAGAGCCCTCAGCTCTATCAAATATTCCTTGAACGCTTCACCTACGCGCTGCCTCCG  
GGATCGGATCTCGTCCCTCAAGCCTCTCGAAGTAACGAGGGGGGCAAGAAAACTCCAAGAAATCCCTCCTA  
AACACGGCCACGGCACATCCCTTAGCCCACTGCTCAGAAACCAACGAGCAGCCCTATCGCAGAATACCT  
CGCTCATTGCCCTGGGCATACGGTCGAGGGCTATACCATAGGTGATAGCGCGCTCCTCGAGGGTCCTCTAA  
GAACCCAAGGGGGTCGGAGCGTCCATCGTACCTCATACCCCACTTCCGAACCTTGCTCCGGGACATTGGGA  
AGTGGCCTCGCCTCCGATGGATGGTGCGGCCTAGTGTAGCAGGGACCACCACCCGGTTCAACAGGGGACC  
TCCCCACCTCTGCGTTGACCGCAGTTGCTCGGCGGTCTTCATTTCCACCGAGAGCAGGAACTGCCTCCACG  
CCCGAGACGGTCAAACCTCGGGGTGGGCGCCTGCAAAAGCCCGTACAGCTGGGAGCTTCTGAGGTCAGGTT  
CCGACTTTTGCCGTGGCCGTCCACCAAAGTCGGGTGGGACGCCCCAAGATGGCGGCTCAAGAGTTTTAGC  
ATACTGGGATTCCAGCTCGGCGAGCCGAGCCCAAATCCCAGTCGAATGACCGCCCTCCTGCACGTAGGTG  
GACAGCCGCTTACGTAGCTCCTCCACGCGCCCTCCTTTTCCAGCCCAAACCTCCTGGGCGATCGCCACTAA  
CTCCTCTTTGCGTCGCTGGTGAATCCAGCGGACGCCTACCCCGGGTTTTGGCACTCACCTGCCTCCATCCT  
TTATTGTATACTTCCTTGCTAGTCGACGTCGCTGTTCCCTCTCTTCCCGTTCTAGGGGTTCGGTCGGTCCCT  
TACTATTCCCCTCTCCTTTTCTTGGTGTGGTGTCTTTTCACTTTTACGCCGATCTTGCTCAGCCACTTTGG  
TTCCTTTTTAGTTTTTTTTTCTTATCTTTTTGTCTTTATATCTTTCACCAAACAAAAAATAACAAAACAATATT  
CCACAAAAGTATTTACCCCTTTTTTAAAACTCAAAAAGGTATTTCAAAAATTTTCTTTTCTCACTTTTCC  
GCTTTTTAGGCTGTTCTTATGTGGTCGCTGCCTTTATCTTTATTGTGAACCCTCGGTTTATTTTAATTTTAT  
TTATTATCCACTCATTTTTTTATTTATTTTTTTGTTTAATTAATTTTATTTATAAAAAGAAAAATTTTATTATTATT  
CACTTATTTTTATTTATTTTTGTTTTAATTAATTTTATTTATAAAAAGAAAAATTTTATTATTATCCACTTATT  
TTTTTATTTATTTTTTTGTTTAATTAATTTTATTTATAAAAAGAAAAATTTTATTATTATCCACTTATTTTTAT  
TTGGCACTTGTTCCGCTCTTATTGTTCCCTTTGTTTACATTTTCACTTGAAGGGTGACCACTTCACTGCCCCG  
ACAGCTGTACTCACGAATTCAACTTTTCACCGCGCGTGAGTTGGATTTCGCCCCACTGTACAACCGCTGCCG  
CGACGCCTTAACGGTCCTTCGACGCCGACGTCGACTGCGCCGCGCGTGTTGGGCACCCGTGTGCGAGCGTG  
GTCTCGACGTCGCCCCGGCTGGCGCGCGCGCGCTGTACTCTCACGACCGACCGTTATGTTTTCGTCTCTTTAT  
CTTACTTGCCGGCTTGCTGCTAGCATTTTTGTCACTCACCAGCTGCACGTGTTTCACTTTTCTGGCTATGCCTA  
ACACAAGGTATAGGAATGTTCTCTGGGGTATACCGGACTACTTAATACCCTATTTTCATATTTTCGCACATA  
CATGACCTTCTCATTTTTCTTGCTCTCTGCTAGGTTACCTTCCCTCTAGGGTATACCCGACTAGAAATACCCT  
ATATATTTTTTTTTTGAAAAATACCTATTCGGGCATGCTTGCGGGCTTTAATCCGCGGACATGCCACACCCCT  
AAACGCCTCTTGGTCCCTGCTCGGGCGCCACTTGTAAGGAAGCTTCCGGCCGGGGTATAATTCTCAGTCTT  
ACCAGGTCTAGCGAGTTACAAGTTATTTATAATTTTCGCTGGGAGAGAGGGCTTAAAGGGGGTGAGTATCC  
TGACCAAACCAAACCCAGATCTACCTCTACACACCTACACCATCGGGCCGTGGCCTCGTACCATCTATGCT  
AGCGGGCCGTGGCCTCGCNCCAACACACTAGCGGGCCGTGGCCTCGCACCAACTCCACTACCTAAACAC  
CCTATCTCTCCGCCGGGCCGTGGCCTCGTACCGCTATGCTAGCGGGCCGTGGCCTCGCACCAACTACACTA  
GCGGGCCGTGGCCTCGCACCAACTCCACTACCTAAACACCAACCGGCAATGCCACCCCGGAGCCACAAT  
CTCGTATCGCATGCCCTCGTTCGAGGTTAGGTTCGAACACCGGTTAGTTCCGATGTTAAGGTAAGCCGGGT  
TACCAGGAAACAGGGAATAATCCAATACTTTCTAGATAATTACAACGTTGGCACTTTATTTCACTATTATTC  
ATTCCGACCTTATCGTAAATCCTAAGCTAAACCCTGCCGCACTGTTTTCTGGAGCCCTAGCGCTCCACTAT  
ACCATCTATGATTTTCGTTTATCTCGCGCAGCACTTCTACTCACCCCTAACGTTCAATCACAAGTGCCGGCA  
CGCTCGCCGGCAAGCCATGCGCTCGCTTCGGCTGCTCAACTTCGCCGCGAGCTTTCGCAACTTCGCCTCGG  
AGCTTTCGCTCTTCGCCGCCGAATTGAAGTTGCGCTCTCAAAGACGGTGTTGAGCAACCGATCGACAACG  
CACGGTTGCAGCGGCGGCCGGCGGTTAAATTCAAACCTCACTATTTAAATCAATTATAATATTCGCGGCTCC  
TTGCCTCTTTGCTACTAATCGAACTGCTTATATTACTGATGGCTCCTTGCCCTCTTATTTCACTAAGATCTTA  
ACCTAATATAATTAATACTTATAACTAAAGAAAATTAATACGTTGTCCCGCCAGCGGCTCCTTTGCCGTAA  
TTTGCCCAAAGGGATGACGGCTCCTTGCCGTGAAAACCTGTGGGGTGGCTGGTCTCATTAGCCGCCTCACA  
>160\_rnd-5\_family-2385\_\_LTR\_\_Gypsy  
CCGCGAGCTTTTAAACTTTAAGGAAAGAAGCTTTATCATAACCATAGCTGACTTGCAGCATAAGTTCACA

ATTGTACTTTAGTTCTAATCTTGGATTCAAATAAATCGGAAGCCTTCAGCCTCCCCTTAAAAATATATTTT  
TTTCCAATTAGTAGCCACTAATCGGTAAATTGGCGCCCAACGTGGGGCTCGCGATTATAAACACAAAAAA  
AGGATAATTAAAAGAAACAAAATCCTTAGTGATTTCGCGAGTGAGCAAAAGTGCCGATTTACCAGTCCAAG  
ATTGTCTCAAAAGAGCATCAAAAATTTTCTAAGAACGAAAATATCGAGTGCCTCTAAAAGAAACATTAAA  
AATTTCCGACGAACGGAAATATCCTGTTTCTGAAAACCTGAAGAGTAGTGAAAATACCCTGAGCTGGAAA  
TATTAATTGTTTACAAGACTTAAAAGTGAAATCACATTTCCCGTTCAAGTTAAATGAAAACATTCCAAAAA  
ATTAATCGATCAAAGAAGCGAAACGAATATTTTCGCCAACAACATTTTTTTCACCAATCAAAAACTTTTAA  
CAAATAAAAAAATATCACGTCAACCTGAGACCCCCATAAAAGAAGACCCTAAAACCCAGAAGGAAGGAAG  
GAAGGAAGACTTGAACGACATATGTATAATCACCCATAAAGAAGACCTTTTACGTGAGCCATCATCATT  
TACTTTAAAAAAAATTTTTTTTTTACTTAAGTAATGAGAGTTTAAATTTGTGTAAGCATTGTGTTAGAATAA  
AGTGTATATAAGCTGGATAACCATATAGAAAGTTTAAATTGAAGATTTTCAAAATTTAAAAATGGCTAACAA  
TAATAACTTGACAGCTGATTTGGTAGCTCAGTTGATTGCGACTCAGACCAGAGCGCTTCAAGAGCAAATT  
GCAGAATTGAAGTTACAAATCACTCTCTCATCTAATAATGAACAAGAATATAAGATTACTGAAATAAATG  
ACCTTATTCGTTGCGATGAATCTTTTGATGTTATCAAGTCCATACCAGAATTCTCAGGCAGCTATAATGCA  
TATGTTAGTTGGCGCGAAGCCGCTTGCTGTGCCATGCGAATGTATAAAGAAGGAAGTAGGAAGTACGTAG  
GTGCTTTAACAATATTAAGAAATAAAATAACAGGTAAAGCTAATGACACCTTGACTAATCACGGTACCGT  
TCTTAATTTTGAAGCTATACTTGCAAGGTTGGATTTTCGCCTACAGTGATAGACGACCAATCTACATAATAG  
AACAGGAGTTAAGTATTTTACGACAGGGTAACTTATCCGTTCTCGAATACTACAATCTAGTTAATAAAAA  
ATTAACCCCTTTTGATAAACAAAACCTATTATGACGTATGGTGACAAAGCCNACATCATTACGGAAATGAAC  
AAGAAAAACAGAGACAACGCTTTAAGAATTTTCATCACAGGTCTTAACGGTTCTTTATCAGAAGTTTGT  
CTCCCTTAAACCTGAAAATTTGCCTAATGCTTTGGCAAAAGCTCAGGAAGTGAAGCGAATTACCAAAGG  
GCTAACTTCGCTTACCACCATTTTCGCAAATACCCATCAACGTAACAATCTAAACCCAGGGCATAACAATC  
AGCAAAAGAAAGCTGAATCCCCAAAACAACCTAATAAAAGATATGACAATCACTTAAGGTTCAATCAAG  
TTCCGCAAAATCAAATTTTTTGCGCAAAGCAACAAGACTCCTCAACCTCCACCGGAGCCCATGGATGTAGA  
CAAATCCATACAACCTACAGAATACACCTTATCCGTATCCCCAAAATCGAAATTTCGGCTCAACCAAAGAAA  
CGGGAATACGCTCCCCCTTCGGTTCAGCAACCTAACAACTCATGCGTATCAATAACCTCGAGGAAGACC  
ATTTTTTAGAAGAAGAGGGGGGAGAACTCCCCTACATTTTTCAGAATAGACAAAAAAATAAATAAAATTTTA  
AAAATATTAATTGACACCGGTGCCACCGCTTGTTATATAAAAGAGGGTATATACGATAACGCAGAAGAAT  
TAGTTATAAAAAAAGGAATTAAAACTGTAAATGGCTACAGTATCATAACTCATTTTCATAACATAAACAT  
ATTTGGCAAACGCCACAGATTTTATGAAATTAATAATCTAGACGCAGATCTATTAGTCGGTTATAATCTAC  
TGAAGGAGATTAAGGCAGTAATCGACTTGTCAAAGGGAACCTTTGTTTTATAATAACAAAAAGGAAAATAT  
TAATTTTACAAAACATGTCCAAGAAACGGTTGGCCATTTAAAAAGTTCAGACGAAGCCTATAACGTTGCT  
TCGTATTTGAACTACCAAAGTGGGAAATGTAAATCATTTTCTTTATTTAATGTATCCGATACAGAATCATC  
GTCTTTAAGTGACGCTGATAACCCACGTATCGAAAAAACTAAAGTTGACGATATTCTTAATGAAGGAAAG  
CTAAAGAAATTAAAACTCAAAAAGAGCAGACGTCGAAAGATGTCGGTATCCTCTACAACAAGTTCTTCTT  
TATGCAAAAATAAATCATTCCATTAATGAAATGGATAATTTGAATATCCTTGAGCAACAAGTCGTTCAACA  
AATAGAAACAAAGCATTCTCAGATTCAAACATGTCTCCCTTTTAGAACAGATATTAGAGGAGAGATAAGA  
ACATTAACGAAAATGCAATTTACAGTAAACAATATCCTTATCCTCATTAGCTAACAAATTTTGTTAGTCA  
GGAAATAAACAGGATGTTAAATGAAAATATAATAAGGCCCAGCAGAAGTCCTTATAATGCCCCGGTATGG  
GTAGTAGGGAAAAAAGGTTTTAATGAAGATGGAACGCCTAAGAATCGATTGGTAATAGATTTTAAAGAAAC  
TGAATAACGATACAATCCCCGATAGGTATCCAATGCCTGATCCTTCAGTCATTCTATCCAACCTAGGCCAAA  
GCCAAAATGTTTTTCGACAATTGACTTAGAATCGGGATTTTCATCAGATTCTAATGAAAGAAGAAGACATCG  
AAAAAACAGCTTTTTCCATTAACAATGGAAAATATGAATTTCTTCGTTTGCCATTTGGGCTTGCGAACGCG  
CCAAGCATCTTTCAGAGAGCAATGGACAATATATTACGTGAAAAAATCGGAAAAAATTTGTACATTTATA  
TGGACGACATAATAGTTTTTTCAAATACCCCGGAACAACATTTTGATGATTTACAAGAAATCATTGAAATT  
CTATTCAAAGCAAACATGAAAATATCCTTGAAAAAATCAAAATTTCTTTAGAAAAGAAATAGAATTTTTAG  
GATACATAGTATCATACAATATCATTAAAACTGATCCGAAAAAAATAGAATCAATCATGAAATACCCTCC  
TCCTAATAATTTAAGGGAATTACGAGGTTTTCTTGCTTAACAGGCTACTACAGGAAGTTTGTAAAAAACT  
ACGCGACTATAGCAAAACCACTCACTAAATTGTTACAGGGACATAACGGTATGGTTTCAAAACATATGTC  
CAAAAAACAGAAATATCTCTAGACGAAGAAGCAATCTCTGCGTTTGAAAACCTTAAATCACACTTGATT  
GCAAACATCGAACTAACTCAGCCAGATTATACAAAAAAGTTTCGTCTCACCACAGACGCTTCCGACATCG  
CCATAGGCGCCGTCTTTTCGCAGGAAAAACAAACCAATCACCTTTGTTTCAAAAACCTTAAATAAAACAGA  
AAGAAATTACGCCACAAATGAAAGGGAATTATACGCCATTGTATGGGCATTAAAAAACCTTAGGAACTAC  
TTGTATGGTGTACAAATTTAGAAATCCAAACAGACCATCAACCACTTTCTTTTGCGGTTTCTGCACGAAA

CCCTAACTCAAAAATGAAAAGATGGCAATGCTTTTCGTAGAGAAGTATTTTCCCCTAAAAATATTTTACAAACC  
AGGATCTACCAATGTCGTCGCTGACGCGTTATCAAGGGTAATGATCAATCATATTTCCAATGAAAGTAATC  
TCGTGTCCGAAGAAGAACCGTCGTCCGATAATGAAACTATCCATTCAGCCGACAGTAGTTATAAAAGCGT  
AATTGAAGAAACACACAAACCATTGAACCAATTTAAACAACAATTACTTGTCTTAAAAACAACATAACA  
ATTCATGAAAAATATGAAGTTTTCAACAAAACAAGACATATTATAGAATACGACACAGTACACAATTTAA  
TAATCATACTTAAAGAATTTCTTCAACCAAACCTGACTACAGGAGTTCATTGCAGTCTCGAAGATTTATAC  
GAAATCCAAAACCTCATTAAAAAACACTTTTAAACAACAATTTTTATTTACTAAAAAGTTTGTCTTAGACAT  
CGAAAACAAAAATGACCAAGAAATTATAATAGAAGAAACACATGCTCGTGCTCATAGAGGTTTGGACGA  
AAATCTTAAGCAAATTCTCAAATACTATTATTGGCCAACACTATATAAAACCCCTTAAGCAACACATACGCT  
ACTGCGAAATTTGTAATAAAAAATAATATAACAGAAACCCCTAAGCAAATTCCTATTTCTAAAGCCCCTATT  
CCGGAGAGAGAAGGTGAACAATTACATATTGACATTTTTTATGCTCAAAAATTAACATTCTTGACATGCCT  
AGACGCATATTCTAAATTTTTAGTGATTAAAGGAAATCAATGACAAATCAGATATGGCAAACAAAGTGTTG  
GAACTTATCCAAACTTTTCCTTTTCGCTAAATCCATAATGATGGACAACGAACCTACGTTTTCTCGACACA  
ATTCAAATCGTCAATGTCTCGTTCAGGTATAGCGATTTATCATGCGAGACCCAGACACAGTTTAAGCAACG  
GTCAGGTAGAAAGAGTTCATTCAACAATTATCGAAATTTCTCGTTGTATTCAAGAAGAATACAATATAAT  
GGATCATTCCGAAGTCGTATACCGAGCAGTTAAAGAGTATAACAACACAATTCAATCGACAACCTCAACAA  
AAACCATGTGACATATTATTTAACAAAATAGAACACCCAAAATTGTCAGAAAAATTAATAATCAGCCCAAG  
CCAAAATGTTAGAGTACCATAACAAAAAGAGGTCACCAAAAAATTACCAAGTAGGTGAAATAATTTATG  
AAAAAAAAAAAAACATGGCGAACGAAACAAACTACAACCTAGATTTAAAAAACAGGTAGTTAAAGAAGACT  
TAGGAAATAAAGTCAAAATAAACAATAGGGATCGTATTATTCACAAAGACAATATCAAATTCTAACCTAT  
TTTATGTTTTTTTTTAATGTATTTTTAGAATGCACATTTTATGTATCTTATCTGTTNTACTGCCGTTTTGCG  
GTGCAGACATTATCAATTATTCAAATGATGACTATGTCCTACTTGAGGATACAGATAATCCTTTTTTATAC  
GAAGCATACGGAGAAGTTTTTTCAGTTACTAATCTAAGTTTTTATAACGATATTTTTGAAAAAGAATTA  
TTTTTTTTAAAAACAAAAACAATACAATTGATCGGGAAGTAACCTTGGAATTGAATTTAATCAAAACACTC  
CTTTCTGAACTTACACCTCACAAAATTGCCAAACGTAGTATCAATGAACTAGGCACAATTTTTAAATGGAT  
CACAGGAACACCAGACCATGATGACATGATAACTATTCAAACCTAAAATCAATGAACTTGTTCAAAACAAT  
AATATGCAAAATCAAATCAATTCTGCAATTTTCAAAGAAGTCACTAAAATCACAAATCTTTTAAGAGATA  
TTAAATTTAATCAGGAATTATTTATGAAAAAATATCGACTTAAGTTGTTATCACTTGACCTACAAAATCTG  
CTGGATACTATCACATTTTCCAAAGCCGCAATATTGAATCCAAAAATCTTAAATAAACAAAGACATGATAA  
ATATATTTAATCACGAAACACTCAATATCACTCTAATCGATCTTTTAGACATTTCTCTTTTTTCGATCGTTT  
CATACCAAGGTTTAATCATAGTTTTTTATAAAATACCCTACAATTAATTACAATTGTAAGTTATACCACGCT  
AAAGCCATATCCCAAACAGATGGAAAATTTTTTCGTAAACGACAAAATTGCTAAATGTAATAACACGTTTT  
ACCTCATTGATAACTTTAAAGAGAGAAATTTATAATAGTTTTGCCCACATTAATTTTGAACCAAACTGTTTT  
GTAAATCTCCTTAATAAAAAAATTTACAAGTTGTATAAAATTATCCGAAAAAAATAAACCAATAGAATTTA  
TAACAGACGGCGCTATTTTAGTATCAGGCACAACTGTATTAACGAAACCTGGCTTACAGGCATTTACCTT  
GTTACATTTAAAACCATAGTAACCATAAACAATGTTACCTACACCAATGTAAAAGAAAAAATTCTTAATT  
ATGTAAAACACAATAAATTCACAACTACTTAGTTAGTGAATATCAAGTTACTAATAATACTGAACTTCA  
ATTAGAAAATACAAATATACTATCAAAAATTGTTATAAAATTAGAAAGTAATCATTCAAAAATAACCTTT  
TTATTATTTATACTAATTTTTTATTTTTACTATGGTAAAGCTTCTTAAACGCTGCCCTTTAATAAATCTAAAT  
CCCCTCAAAATACTGAAATTGAAATCGTCAAGTAATCAAAAGTACCATAACACTCAAACCTACAGAAACAG  
AGCTTGACATATTAAACCAATTAAACGAACAAATTGAATCTTTAAAAAGAAATCATTAAGAATCGGGGAC  
GATTCTTTTTTAAGAAAGGGAGGAGTTATCACCCAGCCCGCAAGGCAATTCTTATTGCAATCATAAACAAC  
ATTTAGTATAAGTCGCTATCCCAATTACTTAGCCCTTCAGACTTATTAGACCCGTTTCAATCACTACGTC  
CACTTAACGCACAGCTGCAGCTCTGCTAACATAAATATCCAGATTTCCCGGCTCTAACATAAACATAACAG  
CGCAACCACTTAACATAAAGATTCATATTCTCATGCGCAATTCATAACGTAAACTAAAGACCCAGTCTCTA  
GAGCGCAATTGCTAACGTAAACATGACTCAAAGCGTCTAGCTTACGCAAGCCACCCCCGCGAGCTTTTAA  
ACTTTAAGGAAAGAAGCTTTAGCATAAACACAGCTGATTCGCAGCATAAGATCACCGCGAGCTTTTGAGC  
TTTAAGAGAATAAGCTTTATCATAACCATAGCTGACTTGCAGCATAAGTTCACAATTGTACTTTAGTTCTA  
ATCTTGGATTCAAATAAATCGGAAGTCTTCAGCCTCCCACTTAAAAAAATATTTTTTTTTCCAATTAGTAGC  
CACTAATCGGTTAATTTGCGCCCAACGTGGGGGCTCGCGATTATAAACACAAAAAAAGGATAATTAAGA  
AACAAAATCCTTAGTGATTCGCGAGTGAGCAAAAGTGCCGATTTACCAGTCCAAGATTGTCTCAAAAGAG  
CATCAAAAATTTTCTAAGAACGAAAATATCGAGTGCTCTAAAAGAAACATTAAAAATTTCCGACGAACG  
GAAATACCCTGTTTCTGAAAACCTTGAAGAGTAGTGAAAATACCCTGAGCTGGAAATATTGATTGTTTACA  
AGACTTAAAAGTGAAATCAAATTTCCCCGTTCAAGTTAAATGAAAACATTCCAAAAAATTAATCGATCAA

AGAAGCGAAACGAATATTTTCGCCAACAAAANTTTTTCACCAATCAAAAACCTTTTAACCAAATAAAAAAT  
ATCACGTCAACCTGAGACCCCCATAAAAGAAGACCCTAAAACCCAGAAGGAAGGAAGGAAGGAAGACTT  
GAACGACATATGTATAATCACCCATAAAGAAAGACCTTTTACGTGAGCCATCATCATTTACTTTAAAAATA  
AATTTTTTTTACTTTAAGTAATGAGAGTTTAAATTTGTGTAAGCATTGTGTTAGAATAATAAGTGTTATAAACT  
GGATAACCATATAGAAAGTTTAATTGAAGATTTTCAAAAATTTAAAAATGGCTAACAATAATAACTTGACA  
GCTGATTTGGTAGCTCAGTTGATTGCGACTCAGACCAGAGCGCTTCAAGAGCAAATTGCAGAATTGAAGT  
TACAAATCACTCTCTCATCTAATAATGAACAAGAATATAAGATTACTGAAATAAATGACCTTATTCGTCGC  
GATGAATCTTTTGATGTTATCAAGTCCATACCAGAATTCTCAGGCAGCTATAATGCATATGTTAGTTGGCG  
CGAAGCCGCTTGCTGTGCCATGCGAACGTATAAAGAAGGAAGTAGAAAGTACGTAGGTGCTTTAACAATA  
TTAAGAAATAAAATAACAGGTAAAGCTAATGACACCTTGACTAATCACGGTACCGTTCTTAATTTTGAAG  
CTATACTTGCAAGGTTGGACTTCGCCTACAGTGATAGACGACCAATCTACATAATAGAACAGGAGTTAAG  
TATTTTACGACAGGGTAACTTATCCGTTCTCGAATACTACAATCTAGTTAATAAAAAAGTTAACCCTTTTGA  
TAAACAAAACCTATTATGACGTATGGTNACAAAGCCCACATCATTACGGAAATGAACAAGAAAAACAGAG  
ACAACGCTTTAAGAATTTTCATCACAGGTCTTAACGGTTCTTTATCAGAAGTATTGTTCTCCCTTAAACCTG  
AAAATTTGCCTAATGCTTTGGCAAAGGCTCAGGAAGTGAAGCGAATTACCAAAGGGCTAACTTCGCTTA  
CCACCATTNGCAAATACCCATCAACGTAACAATCTAAGCCCAGGGCATAACAATCAGCAAAAGAAAGCT  
GAATCCCCAAAACAACCTAATAAAAGATATGACAATCACTTAAGGTTCAATCAAGTTCCGCAAAATCAA  
>160\_rnd-1\_family-124\_\_LINE\_\_CR1  
AGTGGGATTTGAGCGACCACAACATGATCACTGTTGTGATGTCGCCATCCCCAAATGCATATGCTCCTGTG  
CTGTCTTGAAGCTCCCTAAGGCTGATTGGCAAATGTTTGAACCGGAGCTGGTAGAGGAAATCGATGAGC  
ACCTTTTCCAGGAGGACATTGGGATGGTGCCGTTAGATTCCGCTTAGTCTGCACTACGCCTTGTCGTACAG  
TCTGTGTGCGACAGAGTGTTATGCCGCGAGTCCGTCGAGAGCCCAGGGAAAAGTTAAATGGTGCACTGCCG  
AACTGAGTACCAAACGCCGGGAGGTCAGAAGACCGAGGCGGAGTCTCCAGGATGCACGGCGCAGAGGCT  
ACGAATCTGCGCAGTTTCTTGCGAGCTCATCTGCCGACAGCCGTCCGCGAGTTCAGGACGCTTATCCTGAAG  
ACGAAGGAGGAAAACCTGGCGACGATTTCGTTGGAGACCACAGAGATGATGATGGTGTCATGTCTACCGGA  
TATTCGGGGGACAAAAACGGTCCACCGATTTAAGGTGCCTTCGGGCGGATGGCAGGCTGGTTATAACATG  
GTACGACTGCGCGAGTTTTCTCCTCCTTAACTTTTTTCTAGTTGCGGAGTCGAGTTAAGACATCGTCATTCC  
GGACGAAGCTGCTCCAGCGCTCGATGCAGCTTCCTGTGCGGGCATCTGCCTATTGCCAGTGTTTAGCAAAG  
TGCTTGAGGGGATCTTGGTGATCGGTTGAAGGAGGTGCTTCTTGATGGAAATAGATGGCAATTTGGCTTT  
TTACCTGAACCTCTGTGTCGACGATGCCAGGAAGCACGTATTGACCAGCTTTGCCGCCAGCAACGCGCAGC  
CTAATCGGTGCGGGATGCAAGGAAGCTACCTCTTGAGAGGTTTCTCATGTGGCTGCGGTACGGTTTGCA  
GGAGCAAGCCTAACATATGTCAACAAAGGAGCGAGTTCTCAGTTGAGAGTGATTGACGTGTTTTACTTGT  
GCTCCAAGATTTTTATATATTTTTGCGCTTTAATCCTGCTTTTTATTTAAAAATTTTGCATTTTTTCGGTGCTT  
TATGTAAAAAGCTTTTTATAAACTGTGCAAAGTGTTATCTGTTGTGCTGCGTAAGTCTGTTTATTATTGCATT  
TATAAAACGTGGCGTCAGTTCCGTGCTGTTGTTATTGCCTGTTTTGATTCTTTTGCCTTGGTGCTCCCCTGT  
GCATACACTTGTTTGTGCGTGTTTCGCTGCATACCTTTCTGCTTGTGCATCGCGCTCTCGCAAATTTTTTCT  
ATTGCTTTTCGCTCCAAACAATTTGTTTGTGTACGAATAATGGTTTTTTGAGTGTTTACTTGCTCTATCGGT  
AGCGAAGAAGATTATGGAGGAGGTTGTACCATCACTTGGTGTGCGTGTACACGACGTGCGAGAGCTTAAA  
CACCCCGTCGCCATCATTCGCACGCCATCGGTAAGCGAATTTCAAAAGGTGGTGGCGAATAAAAAAGTTTG  
CAGAGGTTGGACTACATATCCAAGCAAACAGGAGTCTGAGACCAAAGGTCATAGTATACGACGTGGACA  
CGACGATCTTGCCGGAGATCTTCATGGAGGAGCTTTATAAAAATAATATTAAGGAGGAAATGACCTCAGA  
GGCTTTCAAGAAAGTCGATTCCGGTCACTCGTCCTCACCTATGCTTCCCATAGATGTGTGCGCTTTGACAA  
TATCTCCGAGTGGCGCTTCAAGCAGTACGTATGTAGATAATGTGGGCAGATGGGGCACATCGAAGTCAAG  
TGGGTAAATCCGGTGGACTGCCGGAATTGCCGCTTCAAGAGGATGCCCTCAGGGCATTATATGCTTTCATG  
GTCACGCCCCGATCTATGGCGCTGTGTTGGCGAGGGTGCAAGCTAAACATTAATGTTTAGCTTCATCCAAGC  
CAACTGTGACCGGGGGCCGCGCTGCGTGATCGATATCGGTGTCTGTATGAGTGACCACGGCCACTTCTTTG  
CGCTGCTGGAGGAGCCATATGTAGACGTGCGTGAAAAGATTACGAGCTTCGCACCCCGTTTTTGGGAAGCC  
ACACTGTGCGAGACCGGAAAGGACCGCTGCTATTATACATTACCCGGATGCCATCAGCCTACCAGTGAAG  
TAGCTGACCACCGAGGCTGGAGTATGCGTGGGGGTGACTGTGGCACGGTTTAATTGACCCCATATACTGC  
CATGTTTATGCTGATTTGATGAGGATATTGTGCTATATGAGCTATATTGAGCTATATATGCCTTGCTGCTAC  
TGCGCAACAATACGCCGGTAATTTTTAGCCAGGGCGCAAATGCTGTGTCTCCCATGTGGTTCAGCAAATTC  
TTTTGTGGCCAGCTGAGCTACAGACGAGGCGAGCAATTGGGTAGTCGTGCCTGCGTGCCAAACTAAGTCA  
GTGAGGCTTACACGTTTGATAATCGAAGAAGACAGAGCGATATCGACGTAATCTTCAACGAAGCAGCGTC  
TACGTGGAACACGTATGACGGGAGTGTTGGACGAGTGGGATTTGAGCGACCACAACATGATCACTGTTGTG



ATGTCGCCATCCCCAAATGCATATGCTCCTGTGCTGTCCTGGAAGCTCCCTAAGGCTGATTGGCAAATGTT  
CGAACCGGAGCTGGTAGAGGAAATCGATGAGCACCTTTTTCCAGGAGGACATTGGGATGGTGCCGTTAGAT  
TCCGCTTAGTCTGCACTACGCCTTGTCGTACAGTCTGTGTGCGACAGAGTGTTATGCCGCAGTCCGTCGAG  
AGCCCAGGGAAAAGTTAAATGGTGCACCTGCCAACTGAGTACCAAACGCCGGGAGGTCAGAAGACTGAG  
GCGGAGTCTCCAGGATGCACGGCGCAGAGGCTACGAATCTGCGCAGTTTCTTGCAGCTCATCTGCCGACA  
GCCGTCGCTAGTTCAGGACGCTTATCCTGAAGACGAAGGAGGAAAACTGGCGACGATTCGTTGGAGACC  
ACAGAGATGATGATGGTGTCTATGTCTACCGGATATGCCGGGGACAAAAACGGTCCACCGATTTAAGGTGC  
CTTCGGGCGGATGGCAGGCTGGTTATAACATGGTACGACTGCGCGAGTTTTCTCCTCCTTAACCTTTTTTCTA  
GTTGCGGAGTCGAGTTAAGACATCGTCATTCCGGACGAAGCTGCTCCAGCGCTCGATGCAGCTTCCTGTGCG  
GGGCATCTGCCTATTGCCAGTGTTTAGCAAAGTGCTTGAGGGGATCTTGGTGGATCGGTTGAAGGAGGTG  
CTTCTTGATGGAAATAGATGGCAATTTGGCTTTTTACCTGAACTCTGTGTCGACGATGCCAGGAAGCACGT  
ATTGACCAGCTTTGCCGCCAGCAACGCGCAGCCTAATCGGTGCGGGATGCAAGGAAGCTACCTCTTGGAG  
AGGTTTCTCATGTGGCTGCGGTACGGTTTGACAGGAGCAAGCCTAACATATGTCAACAAAGGAGCGAGTTC  
TCAGTTGAGAGTGATTGACGTGTTTTACTTGTGCTCCAAGATTTTTATATATTTTTGCGCTTTATTCCTGCTT  
TTTTTTAAAAATTTTGCATTTTTTCGGTGCTTTATGTAAAAAGCTTTTATAAACTGTGCAAAGTGTTATCTG  
TTGTGCTGCGTAAGTCTGTTTATTATTGCATTTATAAAACGTGGCGTCAGTTCCGTGCTGTTGTTATTGCCT  
GTTTTGATTCTTTTGCCTTGGTGCTCCCCGTGTCATACACTTGTGTGTGCGTGTTTCGCTGCATACTTTCTG  
CTTGTGCATCGCGCTCTCGCAAATTTTTTCTATTGCTTTTCGCTCCAAACAATTTGTTTGTGTACGAATAAT  
GGTTTTTTGAGTGTTTACTTGCTCTATCGGTAGCGAAGAAGATTATGGAGGAGGTTGTACCATCACTTGGT  
GTGCGTGTACACGACGTGCGAGAGCTTAAACACCCCGCTGCCATCATTTCGCACGCCATCGGTAAGCGAAT  
TTCAAAAGGTGGTGGCGAATAAAAAGTTTGACAGAGGTTGGACTACATATCCAAGCAAACAGGAGTCTGA  
GACCAAAGGTCATAGTATACGACGTGGACACGACGATCTTGCCGGAGATCTTCATGGAGGAGCTTTATAA  
AAATAATATTAAGGAGGAAATGACCTCAGAGGCTTTCAAGAAAGTCGATTCCGGTCACTCGTCCTCACCT  
ATGCTTCCCATAGATGTGTGCGCTTTGACAATATCTCCGAGTGCGCGCTTCAAGCAGTACGTATGTAGATAA  
TGTGGGCAGATGGGGCACATCGAAGTCAAGTGGGTAAATCCGGTGGACTGCCGGAATTGCCGCTTCAAGA  
GGATGCCCTCAGGGCATTATATGCTTTCATGGTCACGCCCCGATCTATGGCGCTGTGTTGGCGAGGGTGCAA  
GCTAAACATTAATGTTTAGCTTCATCCAAGCCAACTGTGACCGGGGGCCGCGCTGCGTGTATCGATATCGGT  
GTCTGTATGAGTGACCACGGCCACTTCTTTGCGCTGCTGGAGGAGCCATATGTAGACGTGCGGTGAAAAGA  
TTACGAGCTTCGCACCCCGTTTTTGGAAAGCCACACTGTCCGGAGACCGGAAAGGACCGCTGCTATTATACAT  
TACCCGGATGCCATCAGCCTACCAGTGAAGTAGCTGACCACCGAGGCTGGAGTATGCGTGGGGGTGACTG  
TGGCACGGTTTAATTGACCCCATATACTGCCATGTTTCATGCTGATTTGATGAGGATATTGTGCTATATGAG  
CTATATTGAGCTATATATGCCCTTGCTGCTACTGGCGAACAATACGCCGGTAATTTTTTAGCCAGGGCGCAAA  
TGCTGTGTCTCCCATGTGGTTCAGCAAATTTCTTTTGTGGCCAGCTGAGCTACAGACGAGGCGAGCAATTGG  
GTAGTCGTGCCTGCGTGCCAACTAAGTCAGTGAGGCTTACACGTTTGATAATCGAAGAAGACAGAGCGA  
TATCGACGTAATCTTCAACGAAGCAGCGTCTACGTGGAACACGTATGACGGGAGTGTTGGACGAGTGGGAT  
TTGAGCGACCACAACATGATCACTGTTGTGATGTGCGCCATCCCCAAATGCATATGCTCCTGTGCTGTCTG  
GAAGCTCCCTAAGGCTGATTGGCAAATGTTTCGAACCGGAGCTGGTAGAGGAAATCGATGAGCACCTTTTC  
CAGGAGGACATTGGGATGGTGCCGTTAGATTCCGCTTAGTCTGCACTACGCCTTGTCGTACAGTCTGTGTG  
CGACAGAGTGTTATGCCGCAGTCCGTGCGAGAGCCAGGGAAAAGTTAAATGGTGCAGTCCCGAACTGAGT  
ACCAAACGCCGGGAGGTCAGAAGACCGAGGCGGAGTCTCCAGGATGCACGGCGCAGAGGCTACGAATCT  
GCGCAGTTTCTTGCAGCTCATCTGCCGACAGCCGTCCGCTAGTTCAGGACGCTTATCCTGAAGACGAAGG  
AGGAAAACCTGGCGACGATTTCGTTGGAGACCACAGAGATGATGATGGTGTCTATGTCTACCGGATATNCCGG  
GGACAAAAACGGTCCACCGATTTAAGGTGCCTTCGGGCGGATGGCAGGCTGGTTATAACATGGTACGACT  
GCGCGAGTTTTCTCCTCCTTAACCTTTTTTCTAGTTGCGGAGTCGAGTTAAGACATCGTCATTCCGGACGAA  
GCTGCTCCAGCGCTCGATGCAGCTTCCTGTGCGGGCATCTGCCTATTGCCAGTGTTTAGCAAAGTGCTTGA  
GGGGATCTTGGTGGATCGGTTGAAGGAGGTGCTTCTTGATGGAAATAGATGGCAATTTGGCTTTTTTACCTG  
AACTCTGTGTCGACGATGCCAGGAAGCACGTATTGACCAGCTTTGCCGCCAGCAACGCGCAGCCTAATCG  
GTGCGGGATGCAAGGAAGCTACCTCTTGGAGAGGTTTCTCATGTGGCTGCGGTACGGTTTGCAGGAGCAA  
GCCTAACATATGTCAACAAAGGAGCGAGTTCTCAGTTGAGAGTGATTGACGTGTTTTACTTGTGCTCCAAG  
ATTTTTATATATTTTTGCGCTTTATTCCTGCTTTTTATTTAAAAATTTTGCATTTTTTCGGTGCTTTATGTAAA  
AAGCTTTTATAAACTGTGCAAAGTGTTATCTGTTGTGCTGCGTAAGTCTGTTTATTATTGCATTTATAAAAC  
GTGGCGTCAGTTCCGTGCTGTTGTTATTGCCTGTTTTGATTCTTTTGCCTTGGTGCTCCCCCTGTGCATACACT  
TGTTTGTGCGTGTTTCGCTGCATACTTTCTGCTTGTGCATCGCGCTCTCGCAAATTTTTTCTATTGCTTTTC  
GCTCCAAACAATTTGTTTGTGTACGAATAATGGTTTTTTGAGTGTTTACTTGCTCTATCGGTAGCGAAGAA

GATTATGGAGGAGGTTGTACCATCACTTGGTGTGCGTGTACACGACGTGCGAGAGCTTAAACACCCCGCG  
CCATCATTTCGCACGCCATCGGTAAGCGAATTTCAAAAAGGTGGTGGCGAATAAAAAGTTTGCAGAGGTTGG  
ACTACATATCCAAGCAAACAGGAGTCTGAGACCAAAGGTCATAGTATACGACGTGGACACGACGATCTTG  
CCGGAGATCTTCATGGAGGAGCTTTATAAAAAATAATATTAAGGAGGAAATGACCTCAGAGGCTTTCAAGA  
AAGTCGATTCCGGTCACTCGTCCTCACCTATGCTTCCCATAGATGTGTGCGGCTTTGACAATATCTCCGAGT  
GGCGCTTCAAGCAGTACGTATGTAGATAATGTGGGCAGATGGGGCACATCGAAGTCAAGTGGGTAAATCC  
GGTGGACTGCCGGAATTGCCGCTTCAAGAGGATGCCCTCAGGGCATTATATGCTTTCATGGTCACGCCCG  
ATCTATGGCGCTGTGTTGGCGAGGGTGCAAGCTAAACATTAATGTTTAGCTTCATCCAAGCCAACTGTGAC  
CGGGGCCGCGCTGCGTGTATCGATATCGGTGTCTGTATGAGTGACCACGGCCACTTCTTTGCGCTGCTGGA  
GGAGCCATATGTAGACGTCCGTGAAAAGATTACGAGCTTCGCACCCCGTTTTTGGAAAGCCACACTGTCGG  
AGACCGGAAAGGACCGCTGCTATTATACATTACCCGGATGCCATCAGCCTACCAGTGAAGTAGCTGACCA  
CCGAGGCTGGAGTATGCGTGGGGGTGACTGTGGCACGGTTTAATTGATCCCATATACTGCCATGTTTATGC  
TGATTTGATGAGGATATTGTGCTATATGAGCTATATTGAGCTATATATGCCTTGCTGCTACTGGCGAACAA  
TACGCCGGTAATTTTTAGCCAGGGCGCAAATGCTGTGTCTCCCATGTGGTTCAGCAAATTCCTTTGTGGCC  
AGCTGAGCTACAGACGAGGCGAGCAATTGGGTAGTCGTGCCTGCGTGCCAACTAAGTCAGTGAGGCTTA  
CACGTTTGATAATCGAAGAAGACAGAGCGATATCGACGTAATCTTCAACGAAGCAGCGTCTACGTGGAAC  
ACGTATGACGGGAGTGTGGACGAGTGGGATTTGAGCGACCACAACATGATCACTGTTGTGATGTCGCCAT  
CCCCAAATGCATATGCTCCTGTGCTGTCTGGAAGCTCCCTAAGGCTGATTGGCAAATGTTTGAACCGGAG  
CTGGTAGAGGAAATCGATGAGCACCTTTTCCAGGAGGACATTGGGATGGTGCCGTTAGATTCCGCTTAGT  
CTGCACTACGCCTTGTCGTACAGTCTGTGTGCGACAGAGTGTTATGCCGCAGTCCGTCGAGAGCCCAGGG  
AAAAGTTAAATGGTGCCTGCGGAAGTGAAGTACCAACGCCGGGAGGTCAGAAGACCGAGGCGGAGTCT  
CCAGGATGCACGGCGCAGAGGCTACGAATCTGCGCAGTTTCTTGACGCTCATCTGCCGACAGCCGTCCGC  
TAGTTCAGGACGCTTATCCTGAAGACGAAGGAGGAAAACTGGCGACGATTTCGTTGGAGACCACAGAGAT  
GATGATGGTGTGATGTCTACCGGATATNCCGGGGACAAAAACGGTCCACCGATTTAAGGTGCCTTCGGGC  
GGATGGCAGGCTGGTTATAACATGGTACGACTGCGCGAGTTTTCTCCTCCTTAACCTTTTTTCTAGTTGCGG  
AGTCGAGTTAAGACATCGTCATTCCGGACGAAGCTGCTCCAGCGCTCGATGCAGCTTCCTGTGCGGGCAT  
CTGCCTATTGCCAGTGTTTAGCAAAGTGCTTGAGGGGATCTTGGTGGATCGGTTGAAGGAGGTGCTTCTTG  
ATGGAAATAGATGGCAATTTGGCTTTTTACCTGAACTCTGTGTGCGACGATGCCAGGAAGCACGTATTGACC  
AGCTTTGCCGCCAGCAACGCGCAGCCTAATCGGTGCGGGATGCAAGGAAGCTACCTCTTGAGAGAGGTTT  
TCATGTGGCTGCGGTACGGTTTGAGGAGCAAGCCTAACATATGTCAACAAAGGAGAGAGTTCTCAGTTG  
AGAGTGATTGACGTGTTTTACTTGTGCTCCAAGATTTTTATATATTTTTGCGCTTTTATCCTGCTTTTTATT  
CAAAATTTTGCATTTTTTCGGTGCTTTATTTAAAAAGCTTTTATAAACTGTGCAAAGTGTTATCTGTTGTGCA  
GCGTGTCTGTTAGCGTGTCAATAACCAAATTTAATTTCTCCACCCCTCGCGAAATATCATCATTCAAAATA  
AATGTTTCACATGATATGTTCCCAATCATTTGTGCGTACATTCTCCGAGATGGCCAATCCTGACGCTTACA  
CGACCTCGTGTATGCATTACAGCAATTCGCGTTGACAGGCACTGCTCAGGTGTTACATAAAACAATGCTCAAG  
GTAAATTTTGCAAAAA

>160\_rnd-5\_family-3741\_\_LTR\_\_Pao

TTTATAATTGATTTTTTGAGAATATACTGATTGCACAAAAAGATCTACTGTAAAAAATAAAGATCTGTAA  
GAAACACAAAATTTATTATAGGAAACGAGTTTTGACTGGCTTCGTGTGTACGGCAACTAGCGCAAATAT  
AAGAATTTCTGTACGCATGTACAAACACATTCATAGGTTTCTTCAATGAATTCTATCAACAGCAATGCAAT  
TGCGATCGTATTGTTTTCTCTGCTGCTATTTTAATCCGTTTTTCTAATTAAGGAGAATCTTATATCATTCTC  
TTCAAGAAGAAGGTCTGAAGGTCGGATATACAAAATTACAGGGGCATTGCAAACTGTCCACTATTTGTA  
CATTCCTAAAAAATAATCACATCGAATTTGCAGCATTTCTGTAAATCAGTGAATACTGTTCTTGCACTCTG  
GTCTCGGCAGTATAGCAATAGCCCGGATCGTATTGAATCTGTTTCAAGCAATTTCTCGAAGCAATCAATC  
TCCGGTGGCCATCCCCTCCAGTAGGTTTATTTTTCTTGATCTTCCATCGTTAACCAACCGTAGGACACTCC  
TCGATATTGTCTCCCTACAGAAGTGGATTCTACTTTTCTGCTAGGGCGTCTTCAGTTTTCTATTCCGTCTAG  
ACCAACCAGGAATTATCGCCGCTTGTTTCTACCAACGTGCACAACAGATTTCACTACGCACAACCTTTTTT  
ACGAGCATTGTCTACCCGTAATAAAATCGTTGCTTTCAGGATACCTACGGAACTCACTGACCATTCCCAG  
CAATAGGTAGGGGCATAGCTTTCCGGACAAACCTAAAATTTTCCCCCTCGGTTCAAGTATTCCCATCACT  
ATCTCTTTATCCTACTTATATAACACTCTTTTTATTAGTATACATTTCTTTACTTTATTAACAACCTCTTTCTT  
TTGTATTCTTTTTAAGATTATTTTTAATTTTTGCTTTTAGACTCTATTGTTTCTTCTGTACCCCTTTTTCTTAG  
CTGTAGGCTCTAATGGCGTCACTGACAAAATTAGCTGTGAAAAGGGGCATTGGTGGCCGGACGTTCAAAT  
AAAACACCTCCATCGGTGCGTGATACTATTAGTAAATTGTGTATTCTAGCTAAGCTCTTAGCATTTAATTTT  
CATAATAAATGTATAATGTATTCAAAAATGATGAAGAAACAGAATGAAAGAATGAGTATCTAAAAGAGC

GAAATAAATAGCGAACCCCTACAAGGGACGTCCAAGTCGCTGGCATGGTTGTTGTCATGGAAGATAGCCTA  
CCAGTAAATAAATGGGGCCTTGGCTGAATACGTCTCGGCACAAAAGAATAACGCATCTCATAAATTGCAT  
TATCCAGTTTACTCCTCTGCATTGAAACAATATGGCACCTTCATCCAAGCGATACAACCAAATCCAGGGTA  
CGTATTCCTTCAGATGCCGGGTGTGCAGAGAAATTCATGGATGACGCGTCTAATGAAGCTTACGTCCTAG  
AAGCGGCTCCAAGCAGTCCTTAAAAACAAATATTTCTCCTACTGACCGACTCACCTAAACACAGGGCAGT  
CATGTCCCTGCGGAGCAAAATCAAACATCTTCAAGAAAGATCCCCACAGCCCGCTCCACATGCGAAATCT  
CCAAAGCTCTCGTCCCTCTCAGTCAACCATGAAGCCTTACTTAGAGAGCTTCTGGCTCCTCGCCCTCCTCT  
GGCTCCGCGGCTCACCATAATAACGGCGAAGCACTTTCACCATGCGGATGTCGCTTACGTCCCTTCTCCAG  
CACAATAAGATCAGTATCCTACCCACCGCGACTCTGCTCTCCGGACAGACCTATGTCAAACGCATTGCCTG  
TGCTACGCTCCAGGACCACTCAAATGACCTGAGGCAACGTTTCAAAGGATGAACCCATCAAGGCAGATAT  
GAAGGAACAGTTCAGCAATGTCCTCCCCTCCATATCGCTCACTCTCTTTCTTTAATTTTAATTGTCAATGTC  
GTCACACGAAAATAACGAAAAAACGCGCTTTTCGCTTCTACTTATTGTTTATACTCTCCGCCAAGCAACTT  
CCGTATACTCGACCACATATGTAACGTGTTAAACAGAACAGTTTGCATTGCTCAACCAGAAACATAAAACA  
GACTACACAAGCGTAACGAAATAAAATGTTTTACGAAGGACGACCCGGAATCTTCTTCATTTATTTTTGGT  
TACTTGTGTGCAAATCGCATTGAAAATAGTGACTGTTATTTGCGAGCTCTGGTTTTTGATAAGCTTGGATTT  
CAGCCAATGCGGTGGGCGTGCTTTCGAGATGTCCTCTTAAATGCTTTATTTGGCGGCTAAATTCTTCATTA  
ATGTTTCTATCATTACGACACAATTTATCGCCCATATTGAGCCAATCTACCGCAACATCTTTTATTTGACACA  
AATCATATAGATATTGAAACCTTAATAACGTCTTTAAGAATTTTTATTCAATCTGAACAGGTCATTCTGGA  
GCTTTAATTGGAATTTAATTTGTTACCGCCCATACTTTTCTTATAAAAGTTTTTAAAGTTATGTCAATTTAA  
GAAGGAAGCATCTCCATCACTCCATCAGAATCACAAGCCGAGTGGCTCGATCGACTCGTATGTATAAACG  
CAAGGATCTCAAATCCTATAAGAGCTGAAGACTCGAAATTGTATGTGTAGGTCCACATAGTGCCCGCGCA  
GAACGAGTTTTTCCAATATTCGATATTTTGCCCCGTTTTTATGTAATTAATAAATAACGATATCGTATTTAT  
AATTGATTTTTTGAGAATATACTGATTGCACAAAAAGATCTACTGTTAAAAATAAAGATCTGTTAAGAAA  
CACAAAATTTATTATAGGAAACGAGTTTTGACTGGCTTCGTGTGTACGGCAACTAGCGCAAACTATAAGA  
ATTTCTGTACGCATGTACAAACACATTCATAGGTTTCTTCAATGAATTCTATCAACAGCAATGCAATTGCG  
ATCGTATTGTTTTCTCTGCTGCTATTTTAATCCGTTTTTCTAATTAAGGAGAATCTTATATCATTCCCTCTTCA  
AGAAGAAGGTCTGAAGGTCGGATATACAAAATTACAGGGGCATTGCAAACTGTCCACTATTTGTACATT  
CCTAAAAAAATAATCACATCGAATTTCCAGCATTTCTGTAAATCAGTGAATACTGTTCTTGCATCTGGTCT  
CGGCAGTATAGCAATAGCCCGGATCGTATTGAATCTGTTTCAGAAGCAATTTCTCGAAGCAATCAATCTCC  
GGTGGCCATCCCCTCCAGTAGGTTTATTTTTCTTGATCTTCCATCGTTAACCAACCGTAGGACACTCCTCG  
ATATTGTCTCCCTACAGAAGTGGATTCTACTTTTCTGCTAGGGCGTCTTCAGTTTTCTATTCCGTCTAGACC  
AACCAGGAATTATCGCCGCTTGTTTCTACCAACGTGCACAACAGATTTCACTATGCACAACCTTTTTTACG  
AGCATTGTCTACCCGTAATAAAATCGTTGCTTTCAGGATACCTACGGAACTCACTGACCATTCCCAGCAA  
TAGGTAGGGGCATAGCTTTCCGGACAAACCTAAAATTTCCCCCTCGGTTCACTGATTTCCTCATCACTATC  
TCTTTATCCTACTTATATAACACTCTTTTTATTAGTATACATTTCTTTACTTTATTAACAACCTCTTTCTTTTG  
TATTCTTTTTAAGATTATTTTTAATTTTTGCTTTTAGACTCTATTGTTCTNCTGNCACCCTTTTCTTAGCTG  
TAGGCTCTAATGGCGTCACTGACAAAATTAGCTGTGAAAAGGGGCATTGGTGGCCGGACGTTCAAATAAA  
ACACCTCCATCGGTCGGTGATACTATTAGTAAATTGTGTATTCTAGCTAGGCTCTTAGCATTTAATTTTCAT  
AATAAATGTATAATGTATTCAAAAATGATGAAGAAACAAGAATGAAAGAATGAGTATCTAAAAGAGCGA  
AATAAATAGCGAACCCCTACAAGGGACGTCCAAGTCGCTGGCATGGTTGTTGTCATGGAAGATAGCCTACC  
AGTAAATAAATGGGGCCTTGGCTGAATACGTCTCGGCACAGAAGAATAACGCATCTCATAAATTGCATTN  
TCCAGTTTACTCCTCTGCATTGAAACAATATGGCACCTTCATCCAAGCGATACAACCAAATCCAGGGTACG  
TATTCCTTCAGATGCCGGGTGTGCAGAGAAATTCATGGACGACGCGTCTAATGAAGCTTACGTCCTAGAA  
GCGGCTCCAAGCAGTCCTTAAAAACAAATATTTCTCCTACTGACCGACTCACCTAAACACAGGGCAGTCA  
TGTCCTTGCAGGAGCAAAATCAAACATCTTCAAGAAAGATCCCCACAGCCCGCNCACATGCGAAATCTCC  
AAAGCTCTCGTCCCTCTCAGTCAACCATGAAGCCTTACTTAGAGAGCTTCTGGCTCCTCGCCCTCCTCTGG  
CTCCGCGGCTCACCATAATAACGGCGAAGCACTTCCACCATGCGGATGTCGCTTACGTCCCTTCTCCAGCA  
CAATAAGATCAGTATCCTACCCACCGCGACTCTGCTCTCCGGACAGACCTATGTCAAACGCATTGCCTGTG  
CTACGCTCCAGGACCACTCGAATGACCTGAGGCAACGTTTCAAAGGATGAACCCATCAAGGCAGATATGA  
AGGAACAGTTCAGCAATGTCCTCCCCTCCATATCGCTCACTCTCTTTCTTTAATTTTAATTGTCAATGTCGT  
CACACGAAAATAACGAAAAAACGCGCTTTTCGCTTCTACTTATTGTTTATACTCTCCGCCAAGCAACTTCC  
GTATACTCGACCACATATGTAACGTGTTAAACAGAACAGTTTGCATTGCTCAACCAGAAACATAAAACAGA  
CTACACAAGCGCAACGAAATAAAATGTTTTACGAAGGACGAACCGGAATCTTCTTCATTTATTTTTGGTTA  
CTTGTGTGCAAATCGCATTGAAAATAGTGACTGTTATTTGCGAGCTCTGGTTTTTGATAAACTTGGATTTT

AGCCAATGCGGTGGGCGTGCTTTTCGAGATGTCCTCTCAAATGCTTTATTTGGCGGGCTAAATTCTTCATTAA  
TGTTTCTATCTATATTTTCATTCNGCACAATTTATCGCCCATATTGAGCCAATCTACCGCAACATCTTTTATT  
TGACACAAATCATATAGATATTGAAACCTTAATAACGTCTTTAAGAATTTTATTCAATCTGAACAGGTCA  
TTCTGGAGCTTTAATTGGAATTTAATTTGTTACCGCCCATACTTTTCTTATAAAAAGTTTTTAAAGTTATGTC  
AATTTTAAGAAGGAAGCATCTCCATCACTCCATCAGAATCACAAGCCGAGTGGCTCGATCGACTCGTATG  
TATAAACGCAAGGATCTCAAATCCTATAAGAGCTGAAGACTCGAAATTGTATGTGTAGGTCCACATAGTG  
CCCGCGCAGAACGAGTTTTTCCAATATTCGATATTTTGCCCCGTTTTTATGTAATTAATAAATAACGATATC  
GTATTTATAATTGATTTTTTGAGAATATACTGATTGCACAAAAAGATCTACTGTTGAAAATAAAGATCTGT  
TAAGAAACACAAAAGTTATTATAGGAAACGAGTTTTGACTGGCTTCGTGTTTACGGCAACTAGCGCGAAC  
TATAAGAATTTCTGTACGCATGTACAAACACATTCATAGGTTTCTTCAATGAATTCTATCAACACAATGCA  
ATTGCGATCGTATTGTNTTCTCTGCTGCTATTTTAATCCGTTTTTCTAATTAAGGAGAATCTTATATCATTC  
CTCTTCAAGAAAAAGGTGGAAGGTCTGATATANAAAANTACAGGGGCATTGCAAAACTGTCNACTATTTG  
TACATTTTTTAAAAAATAATCACATCGAATTTGCAGCATTTCTGTAAATCAGTGAATACTGTTCTTGCATC  
TGGTCTCGGCAGTATAACAATAGCCCGGATCGTATTGAATCTGTTTCAGAAGCAATTTCTCGAAGCAATCA  
ATCTCCGGTGGCCATCCTACTCCAGTAGGTTTATTTTTCTTGATCTTCCATCGTTAACCAACCGTAGGACAC  
TCCCCGATATTGTCTCCCTACAGAAGTNGATTCTNCTTTTCTGCTAGGGCGTCTTCAGTTTTNTATTCCGTC  
TAGACCAACNAGGAATTATCGCCCCCTTGTTCTACCAANGTGCACAACAGATTTCACTATGCACAACCTCTT  
TTTGGGAGCATTCTCTACCCGTAATAAAATCGTTGCTTTCAGGATACCTACGGAAACTCACTGACCATTCC  
CAGCAATAAGTAGGGGCATAGCTTTCCGGACAANCCATAAATTTTCCCCCTCGGTTCACTGATTTCCTATC  
ACTATCTCTTTATCCTATCTGTATAACACTCTTTTTATTAGTATACATTTCTTTACTTTATTAACAACCTCTT  
TCTTTTTTTTTCTTTTGAAGATTATTTTAAATTTTTTCTTTAGACTCTATTTTCTCTACTGACACCCTTTTTCT  
TAGCTGTAGGCTCTAATGGCGTCACTGACAAAATTAGCTGTGAAAAGGGGGCATTGGTGGCCGGACGTTCA  
AATAAAACACCTCCATCGGTGCGTGATACTATTAGTAAATTGTGTATTCTAGCTAGGCTCTTAGCATTTAA  
TTTTCATAATAAATGTATAATGTATTCAAAAATGATGAAGAAACATGTTTTGTGATCAATAATAAATAAA  
TAAATGTTAATACATGTAAAAGCAATCCTCATCGCGCTCCTCACATGACTTGAAGACCCTCTTCCACCACA  
TCTTCAAAGCATAACATTTTAGAAGTACTCGTTTCTCCTGTCCAAGCTTGGAGCTCCGACCGATTTATTGG  
CTCTAAGTTCAGGACACTTCCTAGTTGGTGGCTTACCATTTTCAGCAAACGAGCCAGTAATCAAAGTAGAC  
ATCCCCATATAAACCGATGGCAGTGTATCAAAGCTCGCCATCAGCAATTCTGCTTTCGGTGAAAGAATGA  
GTATTTAAAAGAACGAAATAAATGGCGGCCCCCTACAAGGGACGTCCAAGTCGCTGACATGGTTGTTATCA  
TGGAAGATAGCCTACCAGTAAATAAATGGGGTCTTGGCTGAATACGTCTCGGCATAAAAGAATAACGCAT  
CTCATAAATTGCATTCTCCAGTTTACTCCTCTGCATTGAAACAATATGGCACCTTCATCCAAGCGATACAA  
CCAAATCCAGGCTACGTATTCCTTCAGATGCCGGGTGTGCAGAGAAATTCATGGACGGCGCGTCTAATGA  
AGCTTACGTCTTAAAAGCGGCTCCAAGCAGTCCTTAAAAACAAATATTTCTCCTACTGACCGACTCACCTA  
AACACAGGGCAGTCATGTCCCTGCGGAGCAAAATCAAACATCTTCAAGATAGATCCCCACAGCCCGCTCC  
ACATGCGAAATCTCCAAAGCTCTCGTCCCTCTCAGTCAACCAGGAAGCCTTACTTAGAGAGCTTCTGGCTC  
CTCGCCCTCATCTGGCTCCGCGGCTCACCATAATAACGGCGAAGCACTTCCACCATGCGGATGTCGCTTAC  
GTCCCTTCTCCAGCACATAAAGATCAGTATCCTGCCACCCGCGACTCTGCTCTCTGGACAGACCTATGTCA  
AACGCATTGCCTGTGCTACGCTCCAGGACCACTCGAATGACCTGAGGCAACATTTCAAAGGATAAACCCA  
TCAAGGCAGATATGAAGGAACAGTTCAGCAATGTCCTCCCCCTCCATATCGCTCACTCTCTTTCTTTAATTTT  
AATTGTCAATGTCGTACACGAAAATAACGAAAAAACGCGCTTTTCGCTTCTACTTATTGTTTATACTCTC  
CGCCAAGCAACTTCCGTATACTCGACCACATATGTAAGTGTAAACAGAACAGTTTGCAGTCTCAACCA  
GAAACATAAAACAGACTACACAAGCGTAACGAAATAAAATGTTTTACGAAGGACGCACCGGAATCTTCTT  
CATTTATTTTTGGTTACTTGTGTGCAAATCGCATTGAAAATAGTGACTGTTATTTGCGAGCTCTGGTTTTTG  
ATAAACTTGGATTTTCAAGCAATGCGGTGGGCGTGCTTTTCGAGATGTCCTCTTAAATGCTTTATTTGGCGGC  
TAAATTCTTCATTAATGTTTCTATAATTCAGCACAAATTTATCGCCCATATTGAGCCAATCTACCGCAACATC  
TTTTATTTGACACAAATCATATAGATATTGAAACCTTAATAACGTCTTTAAGAATTTTTATTCAATCTGAAC  
AGGTCATTCTGGAGCTTTAATTGGAATTTAATTTGTTACCGCCCATACTTTTCTTATAAAAAGTTTTTAAAGT  
TATGTCAATTTAAGAAGGAAGCATCTCCATCACTCCATCAGAATCACAAGCCGAGTGGCTCGATCGACTC  
GTATGTATAAACGCAAGGATCTCAAATCCTATAAGAGCTGAAGACTCGAAATTGTATGTGTAGGTCCACA  
TAGTGCCCGCGCAGAACGAGTTTTTCCAATATTCGATATTTTGCCCCGTTTTTATGTAATTAATAAATAAC  
GATATCGTATTTATAATTGATTTTTTGAGAATATACTGATTGCACAAAAAGATCTACTGTTGAAAATAAAG  
ATCTGTAAAGAAACACAAAAGTTATTATAGGAAACGAGTTTTGACTGGCTTCGTGTTTACGGCAACTAGC  
GCGAACTATAAGAATTTCTGTACGCATGTACAAACACATTCATAGGTTTCTTCAAT

>160\_rnd-1\_family-226\_\_LTR\_\_Gypsy

AAAAAAAAAACTGAAAGTCTGAGTGAGTAGAGTGCGAGTAATGGGCAAGCGCGGAGGCCAGAAAAACA  
AAATAAACAAAAGAATAGCACACATTAAGTGGCTATTATACACGAATACGCCGCCACATGGGCAACGG  
CACAAAAATTAAGTCCGAACTTGATTTTCTGAAAGAAAGCCTCCAGCAAAGAAAGCCAAATACCGCAAC  
TCACTCAGCAAATATCAAAGTTATAAATGAAAACTAATGAAAAAACCCACATCTCCAAAGCCGTTGCCG  
AAAAAACCTGACGTCTGCCCCGAACGACTGCCCTGGACCCTATACGCCCCAGCATGCAAATCCACATGCT  
TGGGACCAAAGACCAGTACGAAGACCGGCACCGGCCCGCCTGAGCCAATAGGCCACGGATATCAGCAG  
CACTGAAGGCAACAGCGCGAGGGGCACTCCGCCACTTTTCGCTACGAAGGAGCGTCAGCGTAGCCAAAC  
CGGCGACGACCAGCTGACGCGGAGGACAACTGGACATTTGGAGCAACAGTTAACATTATTATAATAAAT  
TTGTAAAATTGTGCGGAACAATCTCCGCTCAATTAGAAGTATAGCCAGTAAAGCTATACAAACCAATAGG  
TAGAAAACTTGTTAACGTAAATGCAAAGCAATAATTTTAAAAATATATATATATATATATATTATCGAAAC  
AATTTATGTAAAATTGAGCAGAAAAATCTTTTGCCCAATCAGAGGTGAGGCCCATAAAGCCAAACTAAAAA  
ATTAGGCAGGTTGCAATGTAAAAAATTTTACACGTCTCAGGCACTGGGTAAATTACCCA  
GTAGCAAACAAATTAATCCAAATCTTAAATTCCAAATAAATTTGAAATTTTAAATGAAAAAATAAT  
AATAAGTTTTTCAGTTCAGTCAGTTAAATCAGAAANAAAAAACAATTTGAATCAAATTTATGA  
ATAGTAATACAATAAGTAAATTTTCCGAAGATTTTCTAATTGAATCAAATCATAATCCTGAACAGAACTCC  
AAAATGGGATTATTAGACGTTAAGTCAGTGGATTCCACTGCTAACGTTATAAATAAAGTTGAATCAAACA  
ACACAGATTTAGAATTAACAAATATATTACTGGTAATCATAGTTGTTATAATGTGTGCAAATTGTTTTTAT  
AAAATATATAAACTGCATAACAAATGCCTAAAAAAGATTTCATGAGCCGAGCAAATGACTTGGACAAA  
ATTTAAATTTGCACAGCACAAACAACAAATGATTAATCATAATTGACAATATCATAATAACTATAAGATAC  
CAATTAACATAAATAAATAAAAAAATAAATAAATAAATAAATAAATGAACACACAGTATGATGAA  
TAGTAAGAATATCCCAGAATAATCTTGAAAAACAAAGTAGCTTGTCATATTATGGAATGGCCAGAAGTT  
TCTGAGCGGATCCAAAATATTTAAACGACATTTGAAAAAGCGTATAAATGTCTAACACAAAATAGACAAA  
CGCATATAGATACAGTTAATAGGCACTCCATAACATTGATCGACAGCTTTAACGAAGCTCGAATATTGAT  
ATATCAACATAAAGATGTATTAACCAATGAACATTGGTCAGAAACGTCAAGGTTGCTAATAAGACTGAGA  
AATAATATACAAACAGTTAAAGACAAGCATAATTTAAATTTAATACTACCTTCTATTTTGAATACACCTGC  
AAAGTTGGAGCTCGGCGAAAACCTTGAAGTTCGGACTGAGGATATTCAATTAGAAGAAGAAGATTTAACA  
AATCTAACAATCCCTGCTGTTATCACACTGGATTCCAAAGATATTTTATCCGAAAGTGAAGAAAGTGCTGA  
TAATAGCCGTATAATGGTTGACACAGCCGCTGCCCAGAGGGCATATATTAGGGAAATTGCACAAGCAGTC  
CCAGAATTTGACGGAAAGAAAACCCGTCTTGAAAAATTCTTAACGGCATTAAAGACTTGTCAACTTAACAA  
AGGGAAGTTATGAGGAAATTGCCATAGAGTTGATTAAATCAAAAATAACGGGCACAACCCTCAACAAAA  
TAAAAAATGAAACCACAATAGACGGAATTATTGCAAAATTAAGCCGTAGTTGTGCGGTGAAACACCCGC  
CAACATAAAGGCAAAAATGGACACTTTAACGCAGAAAGGGCAAAACAGCCACTCAGTTCACAAGTAACT  
AGAAAATCTGCGACAGCTTCTTGAAGCTGCTTATATTGACCAAGGCATACCATCTGAAAATGCTGACACA  
CTCAGTACTACAGAAGCCGTTAACACAATGATTAGTAAACTAGTCACGAAAGTGTTAAAACCGTTATGG  
AGTCTGGTATTTTCACTACCATGGATGCTGCCGTTAGTGCATACATCCGTACTAGTACAAGACTTACTGGT  
AGTGTGAATACAGTGATGTACTCTAAAAGAGGGAATAACAACCTACCGCGGTAGTAACAATCGTGGTAACT  
ATCGTGGTAAAGGCAATGGTAACTACCAAAACAGAGGAAATAAATACTACGGTAATCAAAACCGTAGAG  
GCCGAGGAAATGGAACAACAATTCCAACCGAGGCCGAAACAACCAAAATAATAATAACAAACAATG  
TTAGAGTAACCCAGGACAATCAGGGAACTCTCGACAACCCTCAGATATTCAGCAGTAGGAAATTACGCA  
GTTTCATACCATCAATCTTAGTTTGAATATATTTGTAACTTTTTCAATGTGAAGACAAATAAAAACTTGT  
ATTTTAAATAGATACTGGTGCAGACATATCCCTGTTAAAGGAAAATTCTGATATCTTTCATGATATCCAAA  
AAAATAAGAAGATCAATATTCAAGGCATAGGCCAAGATATAATACAGTCCAAAGGACTGATTTCAATAG  
AGATACAGACAAGTAAATACATAATTCCACACGATTTTCACTTAGTAGATTTGCATTTTCGCAATACCTTGT  
GATGGAATAAATAGGCATTGACTTCATTAAGAAATTCAATTGCCAGTTAGATTTCAAACCAAAATGAAGATT  
GGCTCATAATGAGACCAATAATCTAAATTTCCCAATTTATGTTCCAATAACATACAGTTCTGGTAATAAT  
TCCATTGTTCTACCAGCAAGATCCCAAGTAGTCAGAAAAATTCACCTATCATCAGATGAAGATAGTGTACT  
AATTCCAAACCAGGAAATTAAAGAAGGCATTTATGTGCGAAACACAGTTGCAACAACCAAAAATGCATTT  
GTCCGATTACTGAATACGACCAGTACCGATCAAGTAGTAGATATTAATAAATTTGTCATATGAACCACTTTC  
GAACTACGACATAGTTCAAAAACAATCCAGAAAATAGAGAAAAAACTGTCTTATCTCAATTAGCTAAAAAT  
TTTCCGCCACAATTCAAAAACGAATTGACTAACTTATGCACCCGGTTTAGTGACGTATTCGGACTCGAAAC  
CGAATCGATCACNACCAATAACTTCTACAAGCAAAAACCTAAGATTGAAGGATGATGAACNGTCTACATA  
AAAAATTATAGAAACCCTCANAGTCAAATAGACGAGATNCAAGTNCAAGTACAAAAATTAATCGACAAT  
AAAATAGTCGAACCGTCNGTNTCCCCNTATAACAGCCCACTTTTATTAGTTCCGAAGAAATCTCTTCCGGG  
CTCTGACAAGAAAAAATGGCGATTAGTAATTGACTATCGTCAAATTAATAAAAAGCTATTGTCCGACAAA

TTTCCGCTGCCTAGAATTGATGATATTCTAGATCAACTAGGTAGAGCAAAATATTTCTCATGCCTNGACTT  
AATGTCNNGGATTCCACCAAATTGAACTCGAAAAAAGTTCTAGAGATATAACGTCNTTNTCAACAAGCAAT  
GGCTCGTATCGCTTCACGCGATTGCCATTTCGGNTTAAAAATAGCGCCGAATTCTTTCCAGAGAATGATGAC  
TATAGCATTTTCCGGNCTAGAACCNTCNCAAGCATTTCCTTTATATGGATGATCTAATAGTAATCGCTTGTT  
CCGAGAAACATATGCTCAAAAACTTAAGTATGTTTTTCGACAAATGTAGGAAACNCAACCTGAAACTACA  
TCCNGAAAAATGTTCAATTTTTTCATGCATGAAGTCACATTTTTTGGGACACAAATGCACNGATAAGGGAATCT  
TGCCAGACGACAAAAAATACGACGTCATTAATAAATTACCCAGTCCCACACGATGCGGACAGCGCCAGAC  
GATTCGTTGCATTCTGCAACTACTATAGGCGCTTTATCAAAAACTTTGCCGACTATTNCNGTCACATAACA  
AGATTATGTAAAAAAGACGTAGAATTCGAATGGACGNCTGAATGCCAGATGCTTTTGAACATCTCAAAAC  
GGCACTAATAAACCCGACNTTGTTACAATATCCAGACTTCACCAAAGAATTCTGCATAATAACAGATGCA  
AGTGAGCAAGCGTGTGGAGCAGTTTTAACTCAAACTNNAATGGACTCCAATTCCAGTTGCNTACGCAT  
CAAGATCCTTTACTAAAGGAGAAAGTAACAAGAGTACAACNGAACAAGAATTAACAGCTATTTACTGGG  
CAATAACACACTTTNGACCATATATTTATGGTAACCATTTACGGTAAAAACGGATCACAGACCACTAAC  
ATCTATTTTTCAATGGTCAATCCAAGTTCACAATTAACGCGTATGAGGCTTGATTTGCAGGAATATACCTTT  
ACGGTAGAATATCTGAAGGGTAAAGACAGTTACGTAGCGGATGCGTTATCGAGAATAACCATCAAGGAG  
CTACAAAATATAACAGGAAACATAATGAAAGTCACTACAAGACANGCACGTAGACAAGAATCCTGCGCA  
GGAGAAAAAGAAATAGAATTGCCNAGGCAATCTATAGAAAAAGCTTCAAAGCCCAAAGTGTACCAAGTC  
ATTAACAATGACGAAGTACGNAAAGTAGTGACCTTGCATGTAAACAATATGACATGTTTTTTTTAAACATG  
GNAGACAAATTACAGCAAGATACGATGTTACCGATTTATATACTAATTGAACCATTGATTTAGATCAANT  
CTTTCAAAGGCTTGAAACGCAAGCCGGTATATATAAAATCAGCCAACTCAAAGTGGCACCGTGGGAAAAT  
ATCTTTGAACACGTTTCAATGGATAATTTCAAAAAANATGGGCAATCAAATATTAAANTCNTTGAGAGTAG  
CGCTACTCAACCCGGTGACCCAAATAAANNCTGTAAAAGAAAAAGAAGCTATATTGTCTANACTACATGA  
TGATCCAATACNAGGAGGTACACAGGCATTACAAAAACCTTGGCCAAGGTCAAACGACATTATTNTTGG  
AAAGGTATGNCTCGAGANATAAAAGAGTACATCCGCAAATGTCCAAAATGCCAAAAAGCAAAAACTACA  
AAAAACACAAAAACTCCTCTAACAATAACAGAAACACCAATATCCGCTTTCGACAGAGTAATCGTNGACA  
CAATTATTACCACTACCTAGANCAGAGAATGGGAACGAATACGCAGTCACACTCATTGTGATTTNACGA  
AATACCTNGTCGCGATTCCGATCCCAAATAAAAGCGCAAAACACTGTCGCTAAAGCTATATTCGAATCTTTT  
ATTCTGAAGTACGGTCCAATGAAGACGTTCAATTACGGACATGGGNACGGAATATAAGAATTCAATTATAA  
ACGATTTGTGCAAGTATNTGAAAATAAANAACATAACATCAACTGCACATCATCACCAGACAGTTGGAAC  
AGTAGAAAGAAGTCACAGGACTTTTAAACGAATACATACGATCATATATATCAGTTGATAAAACTGATTGG  
GGCGTATGGATCNAATAACNTCGTNTACTGTTTCAACACGACCCCTCTATGGCACACAATTATTGTCCATA  
TGAGCNAGTTTTTTGGTAAACACCCAATTTACCAATATAAATAGNATNGACCCACTATATAATGTAGAAGA  
TTATGCTAAAGAAGNTAAGTTTAGATTAGAANCAGCATATAAAAGGTCTAGGATAATGCTTGAAAAACAT  
AAAGCAAGAAGTAAGGAACTTTNTGATAAAAAAGTTATAGATTTTCAAGTAAAAATAGGAGATAAAGTC  
TTATTAAGAAACGAACTGGCCATAAATTGGATCCAGAATATATAGGCCCATATACAATAGTTAACATAG  
AAAATAGGGATAACATTCTAATTAAAGATAACAAAAATAGGACCCAAAAAGTTATAAGAATAGACTAAA  
AATTTTAAACGAATAAAACATATAAATGTTCTATATGAAAGTCTTTATGTTCCCTTTATGAATTCACAACAA  
ATAACAAGTAAGAGGTTCTAGTCGGGAGCTCCCGACTAGGGGATACCCTGAACCCTCTTCTTCCAACATC  
AAATGCATATATAATCTATTTTAGAAGCTATATGTCAAGTTTGGTTCTAGTCGGGAGCTCCCGACTATGGG  
ATACCCTGAACCCTCTTCTTCCAACATCAAATGCATATATATTCTATTTTGAAGCTATATGTCAAGTTTGG  
TGACTCTAGCTCTTATTATTTACCAAAATTGCCCAAAAAAAGGATATCGATATTGATTTTTATCGATTGCTT  
GGAAACGGAGTAAGCTATCGATTATCGGAAATAAACTCGATCTGCGCGGGAAGTGGAGCACCTACATCT  
AAAATTTCAAGTCTCTAGCTCTTATATGTTCTGAGATCCTTGCGTTCATACATACGGATGGACGGACGGAC  
GGACGGACGGACAGACGGACATGGCTAGATCGACTCGGCTATTGATGCTGATCAAGAATATATATACTTT  
ATGGGGTCGGAGATGCTTCCTTCTGCCTGTTACATACATTTGGATTTTGCACAAATACAATATACCCCTTAT  
ACCCATTTTTTAATGGGTTTCAAGGTATAAAAAATACATATACATTGGCCTGATCAACCAACTAAAAAAAAT  
CAATCCTTGAAAAATACAAGTTACTATAATGAATTTTACGTTTTTATATTTGATATCTTTATACTTTGAAAT  
GTTTACATTAGTATATTCCCATAAATCTTAAATAATTTTTTTTAAATTCATATTATTTTTTATCATTTTTTTTACA  
TTTTATTATTTTATAGCAAAAAAAAATTTATANACAAAAGATTTTGTTCAAAATAATTAAGTTCATTAAA  
TAACTACACATCCATAATGTTACGTTATTTCTTTGAAAAGGGAGCTGTAGTGTGTATATGCCTTAAAAGAA  
CACNCTATATACAAATACAAAGTATAAACAAGCCCGGAGCCACTTTGTATATTGGCTCTGGCTCATATTAC  
GCAGCGCAGTTCAGTCTCAGCTGATGCAACGATGAACAACAGTTGCAGTTATATCCTTAATTACTT  
TTAATTATAAAAAAAAATTTTTTGTAAAATTGAGCAGCATAGCCCGTAAAGCTATGCGAAATGCTAGGT  
AGTATTTTGTGTTATTAGCAATATTGAAAACCTGAAACTAAAAACATTGGCATTTAAGTTAAAAACACTA

TATGTTACATAAAAAACATTATATGAATTTAAAAACATTACATCAACTTATGTAAGAAATTTTAATTAATAAAT  
GGGTTTCGAACGAATCCAACGTTGAAAAATCAGCCGCAAATGTTATAAATAACATAAAAAGTAATTGACCAT  
AAAGAATAATTACTACAATATCTCTTGTATCACTAGTATTGAAAGTGTATGCAATGCATACAAAGAAAAT  
TAAGAAACGCTATAGCAGTAGAGCAGACGGACTAGATAAAGGTATGAATATATTTGAATATGTCAGACATA  
GAGCCAATCATTAGGTTTACGTATAGAGATGAGCCAGACTTTCGTACTCGCGTATTAAACGTACTGCGATT  
ACATAGAGATTTTATAAAAAGTGTGTTATTTTCGAATACGAATACACGGACATGTTCAATACTCATATTAATG  
GTGCGACTGCATCGATACATATCTATTATAATAATATGGAATGGAGTATATTAGTGAAAAATATCAATGA  
CTTTAAACACCAATTTGACAAGTCATATAAATGCATCAATAAAGGCATACCTCTAAAGGTAGAAACACTA  
ATATACCATGTACAAATATTGATAAAACAATATAACAATATAGTACATGCAGTAGATTCCATTAAAGAAA  
AACTAACACAAGAACATGCCAAACAATGCCNTAAGGTCATACAATCTTTAAATACAAGATNTNAAAACAT  
TGGCATTAGACAGAATATCATAATAAATGTTCCAGAAGATCTATTTTTACCAGCAAAGTTTGAACCAAAC  
CAGCTGCAAGATCTGAATGAGTCGAAGCACTAGCCAAAGAACATATAGACTGGACGATGGAAAGTAGGC  
ACAAAAAGTATCGGTGGCATCTGGTCCAAAATCGCGAGTAAGGGAGTAAGATATACAAATGATGTATTTT  
TGAACCGCTTACTCTACAGGAAAGTGCTTGGCGCACTCTCTTCCATATGATTTGTGCGATAGAACGACAAC  
GCTGTAACTTTTATCTCGCTCGCACTTACTCTCAGCTCTCAATGCTCTCTCTTTATGTTTAGGGATCGTTTA  
AATGTGTGTGTGTGTGTATTTGTCCGACAAGCAAACTGGGCAAAAATTCAATTTTTCCCAAATGCTGAGG  
CATTTCTACCCTTTTGAAGGCACGAGTAATATGGAATAGAGAAAGGGTTTGCCACGTCGATGCGAA  
>9\_rnd-5\_family-1307\_\_LTR\_\_Pao  
GCACACAAGCGCATAAAAGCTTCTATTCATATACAAAATATGCAAGTATGCGTGAACAGCGAGTGGA  
TATTTTGAATGCACACATGGCAACATTTAGGTACCCTTACCAACGATAACGAGCTAACATGCAAGAATTC  
ACATCGACGTGGCAAACCTTTCTCTATTATATATTACTCGTGCTTCAAAAGGGTAGAAATGCCTCAGCA  
TTTAAAAAATATTGAATTTGTGCGGAGTTTTGCTTGTGCGGACATACACACACACACACATTTAAACGATCC  
CTAAACAGAATGAGAGAGAATTGAGAGCTGACAGTATGTGCGAGCGAGATAAANATTAACAGCGTTGCG  
GTTCTATCACACAAATTATATGGAAGAGAGTGCGCCAAGCACGTTCTGTAAAGGTAAGCGGTTCAAAAAT  
ATATCATATGTATATCTTACTCCATTACTAGAGTGCTTGGACCAGATGCCTCCGAAACATTTTGTGCCAAC  
GTTTCTGTTTCCGTTTTTCGACGTTGGGTAAAGCTTGGTTTGGAAAGAGGGCTATATCTGCACCCCTGCGAAGA  
AGTTCTACCGCAGGAGGGTGATATTCTGATGAGTCCAGCGTGTCGATTTGTAGAGGCAGATGATTCGATA  
GTTCTGATAGTGACTTATTGCGAATCGTTCCATGGCATATTCCTTTATATGGCGAAAAGTCTATTGCTGAT  
AGAGCCCAGCCCCGATGATTTGGGACGTGGGTAGCGCTACCTGTTGCCTTGCTGCAGCCTCTGATGTTGTC  
CCACTAGTGATGTTTTGCATTCCAATCTCCAGCGAATTTGTATTTGTTACCCTCGAGTCAAAAAGGTCATG  
AAATTTATTAGTTCCGATGGAATTGTACCTGGGAGGACAATATATAGACGGTAGCACTAGATCGCCTTGT  
GATGAATCTATTCCGATCACTGCTACTTGCATGAACTAAGTGTGATGGGGCTAAGAGAATATTGTTTAAAT  
ATAATTTAGTAATTAATTATAAGTTTAGCAGCGCCTCCCTGTGGGGCGTCATTAAATTGGTTAGCTTTATG  
GAGAGGGTATACTGGAACCTCGTATGAATTTTCTGGAACAGATGTGGGTTTCATTAAATTAGTAAGGAATCT  
GGGCTGTGTTGTTCTATGAATGTTTTAATTTCAAGCGCTCTACTCTATACCGAACAGGCGTTCCAAAAACA  
CTATTTTCCACTATTTTTTGGTGGCAAGGTCAATGAGGCTCCTAATATCATTGACCATACCTCTAATCTTCT  
CTAGGAGACGCTGGTTTGATCTTTCCATCATTGAGACATTTTTGTGAAGGATTGGGTCAGCATTGAGATC  
ATGCTACGAGTCCGTAGAGTGGTGGTGGCCGAATTTTTTAAAGAGGCTACGGGGGATGCTTAGATGCTTTT  
GAGAATGTTGTTTGTGGCTTAAATTGCCATTTGGAGGACACGACCTCTGACTGCATCTGCAAAGGTGGTGC  
CGGTAGATATTTGTGAACCCTGTTGAGATCTTGATCCAGCTTGTGGGTTGTAGGTTCGAGTAATCGATTAGA  
AAAATTACTGGGAGTATTTCTTTATGCTGCCGTCTGATTGGCTGTTTTTTGTAGACTTTGCATCCCAGATGG  
TTGGCTGGGTGTTCTTCGCCGCAGTTAGCGCATGGTCAAATATTATTACCTGTTAAAGTGCCTCAGCTGA  
TCGGTGCTGGTTGCCACATTTAACACATACTGGTCTTCTGTTGCAGTATGCTTTGGTATGCCTAAAGGCTTG  
GTAGCGATGGTACTGCGCAAGCAGATTGCTTTTCTAGGCATGTTCCGGATAAAACCTCATTCTGCAAAGTT  
GGGTAATATTAAATTCCTCTTTATTATTTGCGGCTTTGGCAGCATCAACAAGGCACAGGCTAATTTTCTTCT  
TTTTTCGTTTTTATCATATGGCTGGTACATGTTAACTACGTGGTGGATTTTCTAAATGACAAATCTAAATGG  
TCTGTCTTCGCGCAGCTTGTAGTGACGGAGCAGCATATTAGTGCTCTCAGAATTCTTACATTGGATGAACG  
TGTCGCCCCCTCATATTTGTGTGAGCAGAGAAATTGTCTAAGCCGATGGCGAGATCCATGTTTACAAGGCG  
TCTTAATTGCTTACTCATGGGATTATGATCCTCGGTGGACGATGATTCGTTCTTGCCGGTGATGGATTNTTT  
TATTTTTCTTCTGCAGTTGCTTCCGTCAGGAACCTTCTTCAATGTTTATTGGGGATGCGTTGGCGACGCGTT  
TAATGAATAGAACAGGGGAGCCTGCTTGGTGGTTCCGTTTAACTGCTCCTTTCATTATTTTGTATGGGTTGA  
ACCAAGGTGAAACAGTTTACCAGCGATAGCCGACTTTGGTATACGCAGAATTGTTTCTAATATTTTGGT  
AGGCATTGGGTTAACTTTGGGTGGACTTTCGCCTGGGGTGACGCTTAAGGGATATGGTTGTCTAGAAGAG  
TGAGTACAAATCCCAAAGTAAAATTCTCCATGCGGGGGCTGGTAATGGTGCTATTGTAAGTTGTGAATGT

AGTGGTATTTGCACTATGGATATCCGTATGGATACCTGTGGAAGATAGGTTGGCATTAGCAATTGTGGTGA  
TAATTGTGCAGCTAAGAGTATGGCAAGCTCCGCAATTGGAATTATTGTTGTTAAAGGCGTTTGGGTTGATT  
GGGCCGACAGGTATCAATTCGGCGCTAATGTCTTCTTCTATTTAGTCGACGGCATTGATTTTATTGGCCAT  
TAATTTACATGTTTTTTCGCTTTTCTTGTCTATATAATATAGGGTTGAGCTGAGTTGTTAACTCTAACTATA  
TTTTTTTTTATTATTTCTTACAACCTATTGATTGTTGTGTCTACTTTTAAAAATTAAGTTTAAGCACATAAGT  
GTTTTGCGGGATAACTTTGCCTTTACCGAAAAGGCAAATTAGTTGGATGTGTGCGCAACAGCACTGGGTTT  
CAGAACTACCGCTGTAACCGCTACCGGGTAAGGCATTCCCGACATCCTAGTTTTTCAATTGATTTCGCAGCA  
AAGCGGCCAAAGCGTATTAAGAAAAGCTAGCTGGTAGCTACATTGGCAAGACGTGTTACATTTGTGTAG  
CGCACATGGGTTAAGAGCACTTGCAAAATTATCACCTTTGCAACGCTATCAGTAGGTTAAAAGGCGTGCG  
ATACCCTAAAATGTTTTAGTAAGCAGCATATAATGAGGAGTTGCGATAGCTAACACTGTACCATATGCAA  
CAAGCCTCAAATTGCTTTATGGTAATGTCTCGGGTAGCGTAGGTGACGGTGTGCATAATGGCGAATTGCA  
ATAGGGGAACAGTTCTTTATATAGCGGACTATTAACAAATAGCGGGCTATTGGAAGTCTTCTAGCGACCG  
TCGTGGTTTTGATGAAAGCTAATGATAATGATTAATCATAACTGTAGATGTATGCTATAATCTGGTAGTCA  
AAATAATTTTCTTACTTCTACATTAGTATCGAGCTAATATCTGGAAATGTTTGAATAAAGTATGCGAATCA  
GTGGGATCGACAATACGACATAACACATTATTGGTGATGTGAATGCCATTTTTTTAATCCAGAGGGACAA  
GGTTTGCAGCCACGGACAATTTGTATGTGTTGGCCGAAATTAGGCAATATAATCCGACAAGCCCCTCTCTA  
GGCTTAAATTGACAACCACTCAACGGAGTAACACTTGCGGATTTGACATTTGACTCTTCTCAAAGCATTTA  
TATGCCATTGAGAGTTTATTTATACTTCAAGCTGATTGTTGCATGTCAAATCAAACCTAGGATAAACATTGC  
CAACCACCCTTCGCTGTTGGGCTGGGTAGTCGTTGGCGAACTTACGCCGTACGACACCCTAACGTGTCGCT  
GCTAGCCAAGGAGAGGAGGCAAAATGGGCTAAGCTCAAATAAGCTGCAAGAACTAGAGCAACGGTATTG  
TAAATTTGAGGAAATATAGGTTGCGCTGTTGATAAATTTAATGAAAAGAAAAAACTATGCAAAAACAGCT  
TCGTTTTCAATGTTGGACAATCTGAAGATGGCCAATTAGCTACAGCACTTCCATTCAAAGTCCCAAGAAA  
ATACTAGAGTATTGCCCTTAAATTTAGTAATGAAGTTGAATCGCAATCCTCCCCTTAAGGAGCAGTTTTCA  
GAATTTATTGAAGAATACAAAAATGTTGTGTCTATTTGGAAATGTTATACGCCGGTAGGTTCGCATCGCAACT  
TCCAGTGCACATTGTGGTGGTTTGACATGAACACGATAAGGCGCTTATCTAGCAGAAAAATATGGGAAAC  
AGTATCCAATGGCAGTTGAAGCGATTTGATGTAGTGTCTAACTGGAACATATGTTGTGTGCTGCAGACACC  
GTAAGCAACCTTGTGGAATTGAACCAGGAAGTGAGCAAGTGAGCTGTTAGAAGTTGGCAGATTTTGGCTA  
CACACGTGGTGTAGTAATAATCATGAAGTCCTCAGCAAAGCGGACGCTAAGAGCCTCGAAGGCTTAAAC  
TGAAGATGCAGCTAAAGCTCTTGGAATATATTGGGTGAGTCAAAGCGGCCTAGTTTATTTATCGTTTAAATG  
TCAAATGCTTTACTATTACGAAACGAACTGTGCTATCAAATTAGATCAAGTGTTCCATGCCTTGGGATGC  
TTGAGCCCTATACTGCAGGATATTTGTGCAAGAGTTCTGGTGGCGTCAAGTCACGCGGCTCTATGGCAA  
GATACCGAGAGGAAGTGAAGCTCACAAATCAGTGTTTCGCTGCCATGATGGACTGATTAGAGCATTTTCGGT  
TTCTCTGACGCGTCCAATTGAGCTTACGGTGGAGCGATTTCATGCTCGCGTGTATAATAAAGACGGAACGG  
TTTCAGTGCACCTAGTGACTGCGAAATCTAAGGTAGCTCCAGTCAGAGTGACTTCCTTGCCCCGCTTTGAG  
CTGCAAAGAGCACTTTTAAATGGCAAGACTTAATGCAAGGATTCTCAATTGTATTTCATCTAAAGGTTTCGCA  
GCACGACATTTTACAGACTACTCAATTGTGCTCAACTGGTTGTCATCGCATGCTAGCCGATGGACGACTTT  
CGTAACTAACCCGATGGCTGAATTACAATAGTTAAGCAATGTTTCAAGATTGGCATACTAGATTTAAAA  
TTAAACCCAGCTGATATGTATCCATGGAATTGTATCCAGCGGACTTAAACAATGCAACCTTGTGGCGGGA  
GGCACTTGTGTTGGGGCATCCAGTAGATGACTGGGCTAACCCGCGATGGCCCTGCAGCTTCGAAGCAATATC  
TGAACAGAGGAAGGGTATGTTTTTACTTGCCTTGNGACGAGGATGACTTATGATGTTATCGGGAAATGTA  
AATTTACTAACGACTTACGACGGACCAAAGACAATATAAACACTAAGATGAGTTAGGCCCATACATTTGA  
ATGCGACGCAAAATTTGTAGGCTGGCCGCTCATCTGGCCTTTGAGGCTTCGCACAACATGCTTGCCGACTG  
GCTGTTCTGTTCTCCGAAAACGGAGAAGTATATTGAGCGAAAAGTTTTAACTAACGATTGACACAAAGTA  
TCTTTGCTTTATCCATGAAATTCATGCTTTATTTAAATGGTATATTACCCTAGATACTAACACTAACCAAC  
AACATATAGACTGGACATCACATTGAAGAAACGTTGGCACAAAAAGGATCGGAGGCATCTGGTCCAAAC  
TCGCGAGTAAGGGATTAAGATATACATATGATGTATTTTTGAACCGCTTACTCTACAGGAGAGTGCTTGGC  
GCACTCTCTTCCATATGATTTGTGTGATAGAACGGCAACGCTGTTAATTTTTATCTCACTCGCACTTACTCT  
AAGCTCTCAATTCTCTCCCTTTATGTTTAGGGATTAAGTGTGTGTGTATGTGTCCGACAACTAACTGCG  
CACAAATTCAACTTTTCTTAATTGCTGAGGCATTTCTACTGTTTTGAAGGCACGAGTAATATGAAATAGAG  
AAAGGGTTTGCCACGTCGATGCGAAATTCTTGCATGTTAGCTCGTTATCGTAGGTAAGGGTACCTAAGTGT  
TGCCATGTGTATTTTTGAAAATATTTTGGACTCGCTATTCACGCATACTTACATATTTTGTATATGAATAGA  
AGCATTTATGCGCTTGTGTGCCTGTTGCTTGCTGTCCCCGATGCAAATTTAACAAGATTTTGTGATTTCTT  
ATTTTCGATCTCTACACATAGACACTCACATACAAATGTCNTTGAATGGGCATGGGCGCAAAAGAAAATA  
CATTATTGGCACGCGTCTGACGCGCGCCCTTCTTTTTAAGATTTTATTGAATGAATGTTGACCCCTTATTAC



CTGTAGAAGCCCGTTGGGCGCGAAAGTGTTCATATTTTGGCAAGCACCTGCACCCGCATATGTAGGTCAAAT  
GACTGATCACCAAAATTATTACAACGTAAATACATATAAAATCGCTCTTTTTTTTTTAATTTGTTATATTT  
GAATATATATATATATGTGNTTTTTATTTTTACACCAATTTTATTCTTAATCTTANAATAGCAGGGCGCGCG  
TCAGACGCCCGGGCGCTGCTATACTGCTGATCTGATCTGCCCATTCGTAGACATTTGTATGTGTGTGTCTA  
TGTGTAGAGGTCAAAAATAAGAAATCACAAAATCTTGTAATAATTTGCATCAGGGACAGGCAAGCAACAG  
GCACACAAGCGCATAAAAGCTTCTATTTCATATACAAAATATGCAAGTATGCGTGAANAGCGAGTGGA  
ATNTTTTGAATGCACACATGGCAACATTTAGGTACCTTACCAACGATAACGAGCTAACATGCAAGAATT  
TCACATCGACGTGGCGAACCCTTTCTCTATTTTCATATTACTCGTGCCTTCAAAAGGGTAGAAATGCCTCAG  
CATTTAAAAAATATTGAATTTGTGCGGAGTTTGTCTGTGCGGACATATACACACACACATTTAAACGAT  
CCCTAAACAGAATGAGAGAGAATTGAGAGCTGACAGTATGTGCGAGCGAGATAAAAATTAACAGCGTTG  
CGTTTCTATCACACAAATTATATGGAAGAGAGTGCGCCAAGCACGTTCTGTAAAGGTAAGCGGTTCAAAA  
ATACATCATATGTATATCTTACTCCNTTACTAGNGTGCTTGGACCAGATGCCTCCGAAACATTTTGTGCCA  
ACGTTTCTGTTTCCGTTTTTCGATGTTGGGTAAGCTTGGTTTGGAAAGAGGCTATATCTGCACCCATGCGAA  
GAAGTTCTACCGCAGGAGGGTGATATTCTGATGAGTCCAGCGTGTGATTTGTAGAGGCAGATGATTCGA  
TAGTTCGTATAGTGACTTATTGCGAATCGTTCCATGGCATATTCCTTTATATGGCGAAAANTCTATTGCTG  
ATAGAGCCCAGCCCCGATGATTTGGGACGTGGGTAGCGCTACCTGTTGCCTTGCTGCAGCCTCTGATGTTG  
TCCCCTAGTGATGTTTTGCATTCCAATCTCCAGCGAATTTGTATTTGTTACCCTCGAGTCAAAAAGGTCAT  
GAAATTTATTAGTTCCGATGGAATTGTACCTGGGAGGACAATATATAGACGGTAGCACTAGATCGCCTTG  
TGATGAATCTATTCCGATCACTGCTACTTGATGAACTAAGTGTGATGGGGCTAAGAGAATATTGTTTAA  
TATAATTTAGTAATTAATTATAAGTATAGCAGCGCCTCCCTGTGGGGCGTCATTAAATTGGTTAGCTTTAT  
GGAGAGGGTATACTGGAGCTCGTATAAATTTTCTGGAACAGATGTGGGTTTCATTAATTAGTAAGGAATC  
TGGGCTGTGTTGTTCTATGAATGTTTTAATTTCAAGCGCTCTACTCTATACCGAACAGGCGTTCCAAAACA  
CTATTTTCCACTATTTTTTGGTGGCAAGGTCAACGAGGCTCCTAATATCATTGACCATACCTCTAATCTTCT  
CTAGGAGACGCTGGTTTGATCTTTCCATCATTTGAGACATTTTTTGTGAAGGATTGGGTCAGCATTGAGATC  
ATGCTACGAGTCCNTAGAGTGGTGGTGGCCGAATTTTTTAAAGAGGCTACGGGGGGATGCTTAGATGCTT  
TTGAGAATGTTGTTTGTGGCTTAAATTGCCATTTGGAGGACACGACCTCTGACTGCATCTGCAAAGGTGGT  
GCCGGTAGATATTTGTGAACCCTGTTGAGATCTTGATCCAGCTTGTGGGTTGTAGGTCGAGTAATCGATTA  
GAAAAATTACTGGGAGTATTTCTTTATGCTGCCGTCTGATTGGCTGTTTTTTGTAGACTTTGCATCCCAGAT  
GGTTGGCTGGGTGTTCTTCGCCGCAGTTAGCGCATGGTCAAATATTATTACCTGTAAAGTGCCTCAGCT  
GATCGGTGCTGGTTGCCACATTTAACACATACTGGTCTTCTGTTGCAGTATGCTTTGGTATGCCTAAAGGC  
TTGGTAGCGATGGTACTGCGCAAGCAGATTGCTTTTCTAGGCATGTTCCGGATAAAACCTCATTCTGCAA  
GTTGGGTAATATTAAATTCCTCTTTATTATTGCGGCTTTGGCAGCATCA

>160\_rnd-1\_family-280\_\_LTR\_\_Gypsy

TGTTGCATTTGACGTTATCGGCAGCACCGAGGGTTACTCAGTTGGTTGCGTGCGATATTATCGGCCACGCC  
GATATCTTTTTGGCATATGGTCGGAGTATGCGGGGTGAAGCTGGGCCACGGCGGAGCCCAAAATTTTGA  
AGGGTGGCAACGCCAGACATGCGATCCACGGCGCCAAAAGCGACGATTGCTATTGGCCGCCCGTTTCGCT  
CTTAAAGGGAATACGAGGAGAGTGGATCGCATGCCCTTGATATGCCCTTGGCCTTCATTTGGGCCGTTG  
ACCCAAAAAAATGCAGCTGTGCAGATGAGCAGCAACGGTGCCCGCCTCGCAAATGTATGCGTGTGCCGAA  
ATTCGGCACCGATGGTGTGGCTGCCAAAAATGTCGAGGAGTTCGATTTGTTTCAGCGGTTAACGGCGGGCG  
TGCCAGCTCGAAGTGAGCAAAAAAGTTGGACATTGCATTTCTGCTTGACAGAGTAAAATTTTTTCCCTTCT  
GAAAAATTAAGCCGGCACATAATACCAATGGCTTAAACAGACGAATAAAAGTTTTTGTGTTCTTTGC  
CATGTAATAAATTTATATAAATCAAACCGCTCGAATCACAAAGAAAATATAATAAAAAAATTAAGAG  
ACTTAAAAATTTAAGTGCAGACGAGAGACGAACCAATAAGCCAAAAATTAACGGCTCCGGCACCAAGGA  
GACCAGCTCGCGCACCGAGAGAGGCCACGAAATATTCAAGGCCAGGATTCAGTGCAGCGGCGCAAACCA  
GCCATATCCGCGACGCCGCCAGCAAGCGTCGGCGCAAACGTGAAGGCGACGAGACGAGCCACCAACGAC  
CGGGCTCCAACAACGAAGAAGCGGCCACAGGCGAGACCCCGCCACATCCACCGAGTGAGTCCGTTCCAT  
TGTTTTGCCCATCCTCGTTCGAGCCCCTGGCAGAGTCAGAAGAAGACTCCTAATTGCACTCCCTGAAAAGG  
AGTAGATTTTTTTTTATCGTTAAATTTGGTTAATTTGTATTTATAAAATATATTCATACATACATAGGCACT  
TACGCCGAGCTTCACTTTAGAGTGCGAACGGTGAGGAAAACCTCAACGGTGATGCATCTGCGCCTGTAAA  
ATATNAAAAAATCTAAAATTAACCTTTCGCGGAACTATGCTCACATACTTACCTAATTTGAATTTA  
CGCATTTATATCGCCCCTTACCACCCCCAGAGAGCTCTTTAGGTAGGGTAAGGTAGAATTAAGCGATTTAA  
TACATACAATACACAATACGTGACATACCCAGTTTTAAGTAATTGTGCGGGCCATTGTTCTAAATCGGGG  
CAACGATTGCCTCTAAAGTGCCTCATTGCGCGTTTTCTTTTGGCGGCGACTAGCAATATCCTTGTAGTGTTTCG  
TCGCCTGTTCCATTGAGTGTGTAATAAAAAAAAAAAAAAAAAAATTAATTCTATAAGATAAGAGAAAAATTA

GGAATTAATGCGCTGTGTCAATTAGTATAAATATATGCAGCAGTAATACGCACCTGTGAAGTTAATGAAT  
TATCCGCTTGCATGAGATCCTAAACAGCTGCAAGATAAATGCCATAAGCAATGATTATGATTGTTATACAT  
TTTAAGAAAACGCAACCAATTATACGCACCTATTGAAAGAAATCATGTCCGGCTAAAATAATATTGCTGG  
GGAGAGTGGGCATTATGGCCGACACGGGCTAATATAGGCCATTTGGTGGCCAAAATGAGGGGAGACGAGT  
GGAGGTGATCGTCTCATGGTAGGGCGGGTACGCTGGGTCCGGAACCGGGGCCCATCTGGAAGAGTAAG  
GTGGATAAATAGTGTTTTTTTTGTTAATTTATATTGAGTGTCTTACCTTTGTTGTTTACATTTTCATAGTTGTT  
ACAGCTGTGTATTTTGTTCATGAGTTAGTAGTTCCGAATATTTGTTATCGATTATGCGGTTTCAATTTTGAGTA  
GTGTTGTGTGAGTCTGTTTTGCTACAGACGTGTAGCTTTGTTGTTATCGATTGTGCGGACTGCGGGCCAGG  
GATGGGACCACCCAGAGAATCCGATGAGCCAGCCGGCGCGGCCACTGAGAAACAAGCAGTTCGGTA  
ACAATATGGCGCCCAATTTGAAGAAGCACTCGGCTTCTTTGAAGTCGGTGTGTAATCAAAGAAAAATAAA  
TACGATAAAAATGAAGGTACAGAGGAAAGGACTCCCTTGGCTTCAGGACCCACACCGCTGAAGTCTTATG  
TGGCACGAGTAGGTAGCTCATAATCGCGCAGCGTGTAGTGGAATCCGAGAAGCACGACGGAAGTAGAGG  
TTATCTGAATATCCATCCATAAGCATGAGGGGTTTTTTTTTGTAGTGGTTGATGGCCGTTTCGCATGTTGGCG  
AAACATTTGCGACTATCCATCGTTCGCCTGGTGGTAGCCGCAACGACAAAGGCATCTCATGGTTAAAAAA  
ATGTGATATTAGGGTAGTTTAGTCAGATGTTATTTATTCAATTAGTTGTTTTTGTCTCATTTTGTGTCAATG  
TTGGATGTATGCTGGCCGTAGTTATACGAGCTTCGGAGACCGGTGACCCAGGACGATATAGAGCCGAGCC  
TGCGCCGCATCTGTCCACACAGCATATCCCAAGAATGGCCAGAAGAGCGACGGAGACGGATCTTGCCATGG  
TGTCCATTGACATGGGGTGTTTTTCTTGTGCGGGTTGATGACGGTAAGTCACGTTTCGCTAGTTGGCGAACGT  
TCGCGACCGTCAATCGTAGCCTGGTGGTAGCCGCCATGACAAAATAACCTGTGACGAAATGTGATATTAG  
GGTAGGTCTGACTAGAGTTTGTTTAATGTTTTCTATTTGTTTTGTCCACTCTGTGTTAACGTTTGGTGTGT  
GCTGGCCGTAGTTAAATGAGCTTCGGAGGCAGGTGACCCAGGACGATATAGAGCCGATCCTGCGCCGCAC  
CTGTCCACACAGCATACTCTAAGGGTGCACAGAAGTGCGACAGAAACCAATAGCCTTCAAGGTAGCGTTC  
CTTGATGCCGTCCGTCACTCAAACTGACGAAGTACGATGGGACGAATGCTTAAGTGTGTCCACTGTCC  
AGATTATGCGTAGATTATTTAGCCTGTGTTAGGATTTGTCTTCTCTCCCCCAAGTATTTGAAATTAATTAGA  
AAGAAAAAAAATTTAATTTTGTGAGTGTTTTTGTGGTTCGATGTGTATTAATTTATTATTCTTTATTAGTAAG  
ATTTGTTAGTGGGTGTTTATTTATTTATTAATTTATTAGAAATATTAGTAAAGTTTTTATAAGGGTTGTAAG  
CCTTGTAGAAGAGAGGGGTACTGTTCTCAGAAGGGATAAGTATGGCTGAGGAACAGGTGTCTGATTGGGC  
TTCTGACGCTGATGGGGCGTCGGCTCTGCCACCGCCGCGCCAGCTGGAGGGCTGGTGCGAACGCCAATG  
AATTTCCGGGGATTTCCAGAGAGACAGATCCCGAAAGAGGGTCACCTGGTAGACTTGAGAGAAAGAATTG  
GCGCAACAGGATAGACCTCCACGGAACCTGGAGTTCCCAAAAGCCCCGAAAGACTCAGTGCTCAAATCG  
GCGGCAAACGCGGCGATCGCTCAGGCCCACCAACATATCTGCATGCTCTGCCATCTGGCATCAGCGAGT  
CCATCCGCGAGGAGATGCGAGCTGGCTTCATGGAAATGATGAAGGGCATCATTGATGTGCTTAGGCCGCC  
AGGGAGCCAAACCGCCGAGACTAACACTGCGCCGAAGCCGCCAAGACATGTCGAGCCGGGACCGCGAAC  
AGGCGCCATCCCGAAAGAACGGGAAGTGTTCCAGCGCGAGGCATTTCCACCACCGGTGCCACCGAAGCC  
ACGTAGGCAAGGCGCACGAGGGGCGGAGTATTCGTCCAGCAGCCAGTTTACGTGGCAGATGCTCAGTCG  
AGGAACTGGCGTAACCCGAATAACCGCCATTTCCGAGTAGAGGACCGGAGAGCGGATGATTTTCAACCGG  
AGGAGGCGTACGCCAACGTGCGAGAACTGCGTACATGAAGCTCGAGCGGTGGAACGTCAAGTTCGACG  
GCGAGGACGCGATGAATTCGGTTCGAGGACTTCGTGTTCCGCCTAGAGTTCCTGCAGAGGCAGTATCAGTG  
CCCGTGGAAGGAGGTCTGCGCGGTTTCCACCTGCTCCTGACCGGCCGCGCCCGCGAGTGGTACTGGATG  
CACGTGCGGCATTCTAGGGTCGACAGCTGGATGCAACTGCGGCATGCCCTCTTGGACAGGTTCCGGGGCT  
ACCAGACGGAACACGAGGTAATGCAGGAGCTTCTACAACGAGAGCAACAGGCCAGCGAAGGGGTGGATG  
ATTATATCCACCACATGCGTCAACTCGCCGCGCGATTCCAGAAGCCGCTGAGAGACCGAGAGCTGGTGAG  
GATTATAAAGCGTGGTTTAAAAGAAAGTCTGGCGAAATATATTTATGCCATGGACGTACTACCGTGGAT  
GAGCTGCGCCAAGAGTGCCTAGAAGTGGAGAGGCACATGGGTTCGAGAAGCCGGACCGGGTACCTTCAG  
CCGTGCGGTTGTCCACAAGGAACGAGGCCCGTAGTCCACGAGGTTGAAGTTCCACCGCATCTTACGGAAA  
CGCCGCCGGGAGAAGTGGAGGAGGCATTCGTGCGAGGCAGGAAGTCAATCCCGAATNGTGTGCTGGAAGT  
GCAGACAGTTCGACCACGTCTTTAGAGACTGCCTGTCCAAGGAGCGGAAAATATTCTGCTACAGGTGCGG  
AAAGCCGGACACNTTCTGCTCGCAGTGCGAAAAGTGTCCGGGAAACCCAGAGGGAGCGCGGTGATGGC  
GGGACAGACGCGTTCCGGGACGGCGACCGCGGGAAAGCAGGAGAGGGGCACCTACCAGAGCCAATAATC  
ATTGGAAAGGAGACGGAGATTTGGACCATAAGGACCAGGATAAGGCTAATTATTATATATAANGGTANA  
AGCGAAGGAGGANCACTNAGGGGCTTACCATACGAAGAACGTGTCCGGGCATACATGTGCGGCCCGGAAT  
AGAATTTTTGGTGAGCGACAGCTGGAGGGGATGACGCTGGCCACCNGGAGAGTGGTGAAGGCTCGGGCG  
CGCTTCCGCAGACGCAGGATGACGAGGCGCCAGGTTCGTGGAAGCTGTGAGACGGGAGGATAGCCTAGAC  
CCACGCGTATTCGCCGAAGTGGAGGTCGCTGGAGCCAAAATGAAAGGGTTGCTAGACACCGGGGCCTCG

GTCAGCCTGTTGGGACAAGGTGGCCGGGAGTTAGTGGAGGAACTGGGANNNAGAGGCGGGCCGTACGNN  
TCGATGGTNAGGACNGCTGGAGGNGAGGATAAATCAATCATAGGTAGGGTAGAGCTCCTAATCTCGTACA  
GGGAGCAGCATAAAAAACATAACGTTTTTTTATCTGCCCCTACCTGAAACCAGCGAGCCTATTTTGGAAATTGA  
TTTCTGACGAGCTTTTAACCTAGCCCCTGATATTTTGGGCCCCGAGGAGATAACCTCCACAGAACACTATG  
CGAAGACGAAGAGGGTGAAAATGAGCCAGACTCATGGGAGTTGTCTCGGGAGGAAAGGGTAGAGTTGG  
AGGCGGTAAAGCAGGGGTTTTTGCCTTTTGAGCATAGCGGATTAGGAACGCCAGACTTAGAGAAGCACAC  
TATCGACTTAGTGGAAGGTGCCCAACCATTCAAAGATAGACCCTACCCATTATCACCGGCGATGCAGAAG  
GTAGTGGATGACGAAGTAGACAAAATGTTGAGTTTGAAGGTTATAGAAGAGTGCAACAGCCCATGGAGT  
AACCGCACAAACCGTAGTGCGAAGACCGGGGAAACCCGTTTTTGCCTCGACGCGACGCAAGCTCAACAATTT  
CACGGTGAAAGACGCGTATCCACTACCCTGTATAGAAGGCATCCTATCTAGAATNTACCAGACCCACTAC  
ATCTCCAGTGTGGATCTGAAGTTCGCGTATTGGCAGGTCGAACTAGACGACAAAAGCAAGCCCTATACCG  
CATTTACCGTACCAGGTAGGCCGCTATACCAGTTTCGCGTCATGCCGTTTGGTTTATGCAATGCAGCCCAA  
CGTCTAGTTCGTCTGATGGACAAGGTAATTCCCAACGAGTTGCGGTGCAACGTCTTTGTGTACTTGGTCGA  
CTTATTAGTCATTTCCCTTGATTTCCNAACGAATTTGAAATATTTGCGACAAGTGGGAAAATGCTTAAGAG  
AAGCCAAGCTCTCNATCGGACTGCACAAATCCAAATTTTGCTTCCGGGCATTAAAATACCTAGGATTCATT  
ATTGGTGGTGGCACGCTTCGCATGGACCCCGAACGGGTTANAGCTTTTAAGCGAATCCCCGTGCCTCGGTC  
GCGCAAAGAGGTTGCTCTTTTTTGGGTACCGCAGGTTGGTACCGGCGCTTTATGCGAGATTTGCGCGGCAA  
TGGCCGCCCCACTGACTGAAATGCTAAAAAAGGATAGCGGGAAGCGCGTATTGAGATCTNACGTAGGCG  
GTTTTACGGGCCCGGCATGGTTTATCAGGTAAGGGATTGGGTGAGACGATGTGTGACATGCAAGGAAGTC  
AAGGCACCAAACCTTTCGCATGCAAGTGCCTTAGGAGAAGAGGTAGTGACCGACCATTCCAAAACTATA  
TATCGACTTTCTGGGAAAGTACCCACGTTGCAAGCGAGGGCACGCGTGGATCTTCGNGGTAGTCGACCAT  
TTTTCAAATCTACCTTCTTGAAAGCGATGCGGGAGGCTACGGCTCTTAACGTGGTGGAGTTTTTGGTCAG  
CGAGGTTTTTTATAAGTTTGGAGTACCCGAGGTCATCCACTCTGATAACTCTGGCCATCCGGGCGTATCTA  
GAGCAAGATCATCGCGAGTGGGACCTCTACCTTCCGGAATAGAGGTGTCCATACGAAATGCCATACACA  
CCGCGACCGGGGTGACCCCTTCTTTGCTGTTTTTCGGACATCATATGTTCTTAAACGGGGCATGCTACAGA  
TTGGCTCGTAGGTTAGCGTCTCCGAGTGATCATGAGATCTCCCATTTGCACCCCGCAGACAAAATACACCT  
GATTAGACGGCGAGTCCAAGGCCAACTACATCAGGCTTACGAAAGAAGTCAGCGGCAGTACAATGCTCG  
AGCCCGGGTGTTCAGGCGGAACCCGGCCAAGAAGTTTACCGACGCAATTTTGTGCTGAGTGACTTTGGA  
AAAGCTTTNAACGCCAAGTTTGCAAGAAAGTTCCTTAAGGCCAGAGTAGAGCGTCGAGTAGGCAACA  
CGTACCTGCTGGAAGATTTGAAAGGGAAGCCCTTAGGAGTGTTCCATGCGAAGGACATACGAGTGTAGAT  
CAGGGTCGTGGGTGTGGCCTACGTTGGGCGTTCTATTTGGCCGGCTGGGCGAACCGGATAGGANATGCGC  
ACGCAGATTTATAGTAACGGTTCGGGTTTCGCGCTTACAATAATCTGCGTGGCGATGCAACATTACATTTGAC  
ATATCGACGACATCGATATTGCCCGTAATTGGTTGCGTTCTTTATTATCGGCCGCGCCGATATCTTTGGTCA  
TAGGGCCAGAGTATCGGGGTGAAGCCGGACACAGAACGGCGTTTAAAATATCGAGGAGTGGAACACCG  
AACTTGCGATCCACGACGCCAAAGGAGGCGATTGCTATTGGCTGCCCCGATTTCGCNCCCAAAGAGATAAAA  
GAGAGTGGATCGCATGAAGATGCCCTTGGCCGTGCGGCCGTTGACCCGGAGAACAGCNGTGCCGATGAG  
CAGCAACGGTAACCATATTTAAATGTACGCGGGTACCGAATTTTCGGCACCTTTGATGTGCTGCCCAATGTA  
CAGTGNGGGAGTTCGACTTTGTGTCAGCGGTCCACAGCGGACGTACCGGCCACGGAGCATNTGCTTAAACAA  
ATCAAAGCGCATACATTAGTTAATTGACAAGATAATTCCTTATGTGCTAACGTATTGCAAAAGAANTAGT  
GCACAAGAGCGATAATACACGAAGCAATAATACTAGAAACACACTGTGCTCATTTAAAACCACTATAA  
AAGCGATACTCTATTAGAGCAGCCGACAGCCATTCTGTGGCACACANCGCTTGAANCCCGCGCCGGAGGAC  
GCTGGCCAGATCAACCCAGATATTCGCGGGGCCGATTTTCAAGGCACGGCCAAGTATCGGCGTAACCATG  
CGACGGAGAGACGAGCCATCACGGACGGGACTCACACGACGAAGAGGCGGCCACGGGCGAGACCACGC  
CCATATCATCCGAGTGAGTCTGTTCCATTTTCGTGCCTCCTCGCCTGAGTAAACGGCAGAGTCCGAAGCAGA  
CCCCTNATTGTGCTCCCTGAAAGAGAACCGATTTTTTTTTTCGGAATTTTAACTCTAGTTTTTTTTTGTATT  
AATAGATAAAAATACTCACGACTAGTCTAAATTAAGTAAATTTCCGAAAGTGCGAACCGGGAAGGAAAG  
GGCCCAAAGATTATTGCGTCTGCCAAGTAAAGAATGAAATTAATAAATTTAGATTTTGGTCAACTTATGCA  
CGAGTGATACCCACTTATACGTATATATATATAT

>9\_rnd-1\_family-235\_\_LTR\_\_Gypsy

AAAAGTGAAAAGACACCAACACCAAGAAAAGGGGAGAGGAATAGTAAAGGGACCGACGGAACCCCTAG  
AACGGGAAGAGAGGGAAACAGCGACGTCGACTAGCAAGGAAGTATACAATAAAGGATGGAGGCAGGTG  
AGTGCCAAAACCCGGGGGTAGGCGTCCGCTGGATTACACAGCGACGCAAGAGGAGTTAGTGGCGATCG  
CCCAGGAGTTTGGGCTGGAAAAGGAGGGGCGCGTGGAGGAGCTACGTAAGCGGCTGTCCACCTACGTGC  
AGGAGGGCGGTCATTTCGACTGGGATTTGGGCTCGGCTCGCCGAGCTGGAATCCCAGTATGCTAAACTCT

TGAGCCGCCATCTTGGGGCGTCCCACCCGACTTTGGTGGACGGCCACGGCAAAAGTCGGAACCTGACCTC  
AGAAGCTCCCAGCTGTACGGGCCTTTTGCAGGCGCCACCCCGAGTTTGACCGTCTCGGGCGTGGAGGCA  
GTTCTGCTCTCGGTGGAAATGAAGACCGCCGAGCAACTGCGGTCAACGCAGAGGTGGGGAGGTCCCCTG  
TTGAACCGGGTGGTGGTCCCTGCTACACTAGGCCGCACCATCCATCGGAGGCGAGGCCACTTCCCAATGT  
CCCGGAGCAAGTTCGGAAGTGGGGTATGAGGTACGATGGACGCTCCGACCCCTTGGGTTCCTAGAGGAC  
CTCGAGGAGCGCGCTATCACCTATGGTATAGCCCTCGACCGTATGCCCAGGGCAATGAGCGAGGTATTCT  
GCGATAGGGCTGCTCGTTGGTTTCTGAGCAGTGGGCTAAGGGATGTGCCGTGGGCCGTGTTTAGGAGGGA  
TTTCTTGAGTTTTTCTTGCCCCCTCGTTACTTCGAGAGGCTTGAGGACGAGATCCGATCCCGGAGGCAGC  
GCGTAGGTGAAGCGTTCAAGGAATATTTGATAGAGCTGAGGGCTCTTATGCACCACGCTAGATACGAGCC  
GGCACAAGAGCTGCATCGGATCTACGAGAACGCCGCTCCGGAATACAGGCTCTATGTGCGACGGCAAGA  
CTTTTCTACCTATCCCAGCTAACTCAACTGGCCGTTAGAATACGAGACCGTCGTGAGGCAGAGGGCGGAG  
TACTCAGGCAGCCAACCCTTGGGTCAGGGTGTCTCTAGTTCAAATAGTGCAGAGTGGGCGAGGACGGCGC  
AGTCCTCGGGACATCTCAATCCGTTCCGGTCTGCTCCCAGCGGATCCGGGACGACCGTTGTGGACAACAG  
GGTCTCCACCCACCCGCTGCAACTCACGCAGAGGTGGCCCATCAGATGATGAGCCAAGAGGCCGGGAAC  
GGATATGATCCGCGACGGGCGTGTCTAGGTGCGCACAGGAGGGGCATTTTGCCAGGGAATGTCCCAACG  
CCCCTGTCTTATTTTGTGGGTATGTGGAAGCCGGGGCCGAAGTAGTCGGGAGTGTGCGCGCGCGGA  
GACGGGAACGGGCAACGGCGTCGTCCGGACCAGGATCGGGTTCGGCGCCAATACACGCGGAACGCAGCA  
ATAGGACACCCACTGAAGGTGGACGGTGGCCGGATCGTCGCTACGGTAGAGATTGGCGGACGAACGATG  
CCCGCCACGATCGATACCGGAGCCACTCGTAGCTTCATGAGTGAGGACTGCGTACGCAAATGGACGATCC  
GGGGAAGAGCGGAGGAAATACAGGCACGTATCCGCCTGGCAGATGGGTCCACCCTAGAGGTAGAAAAGG  
CTTTGAGAGTAGACGCCAGCTTAGGGGGGAAAAACGATCAGCATGACGATGCTCATCATGCCCTCAATGCT  
GGACCATGTAATCCTGGGTATGGATTTTGGGGGCGATGAATACCACAATACGCTGCGGCGAGGCGGAAC  
TGGTCCCTAGAAGCAGCGACGACACCGGGCGTGAGGCCAGGAACGAGCGAGGAGTCGGAGGAAGGCCGC  
CCAAGGCATGGAAAGGGAGCACCTGCTCGGCTACAGAGGGAGCCGGAGGAAGGCCTCCCAAGGCATGGA  
AAGGGAGCACCTGCTCGGCTACAGAGGGAGCCGGAGGAAGGCCTCCCAAGGCATGGAAAGGGAGCACCT  
GCTCGGCTACAGAGGGAGCCGGAGGAAGGCCTCCCAAGGCATGGAAAGGGAGCACCTGCTCGGCTACAG  
AGGGAGCCGGAGGAAGGCCTCCCAAGGCATGGAAAGGGGAGCACCTGCTCGGCTACAGAGGGAGCCGGA  
GGAAGGCCTCCCAAGGCATGGAAAGGGAGCACCTGCTCGGCTACAGAGGGAGCCGGAGGAAGGCCTCCC  
AAGGCATGGAAAGGGAGCACCTGCTCGGCTACAGAGGGAGCCGGAGGAAGGCCTCCCAAGGCATGGAAA  
GGGAGCACCTGCTCGGCTACAGAGGGAGCCGGAGGAAGGCCTCCCAAGTCATGAAGGGGGCACCTGCTC  
GGCTACAGAGGGAGCCGAAGGCAGGCCTCCCAAGTCATGAGAAGGGAGTACCTGCTCGGCCTTCGACGG  
AAAAGGTCAGGAAAAGGGGAGTAAAGTCCGGCCCCGAATCGACAGCCTGGAGAACCCAAGAGGTGGCGC  
ATAGAGCTGCAGAGGCAGACTTCTAATGGCTACGGAAGCGGCACGGCGGGAACGTGCAAGAGAAAGGAC  
GGAGTAGGAGCGATGACCAGAATCCACACGGACATAGAAGGCCAGGAGCGATCGCCAGAATCGAGCGGC  
CACGGAGTTCTGTCTGGAGTCGAAGTGGTCCCAGGATGGGGCGATAACGGCATCGAAGAGGGCGGANTGG  
CCAGCGGGTCTGGACCCAGAACTGAGGGAGTTCTTGAGTCAAGAGCTGGCTCTCTTCGAGGGGCTGCAGG  
GAATCTCGCACATCGCGGAGCACCGAATCCGGCTGAAGGATGACAAGCCGTTGAAACAAAGGTACTACC  
CCAAGAATCCGGCCATGCAGAGGGTGATCGACGAGCAAGTGGATGAGTTGATCCGGGCAAATGCCATCG  
AGCCGTCGCGTAGTCCGCACAGCGCCCCGATCGTCTTGGTCAAGAAGAAGACTGGCGAGTGGCGTATGTG  
CATTGACTACCGACAACCTAACGCGCATTCCATTCCGGACGCTTATCCGGTGCCTCGTATTAACCACATCC  
TGGAGCGGTTGCGCCACGCCCGGTTTCATCTCCACTCTGGATTTGAAGCACGGGTACTGGCAGATACCGAT  
GGCAGCCGATAGCCGGGAGTGTACGGCGTTTACAGTCCCTGGAAGAGGTCTTTTCCAATGGCGGGTGATG  
CCATTTCGGCTTACACTCGGCGTGTGCGACATTCCAGCGCGCTTTGGATACGGTAATAGGGCCGCAGATGG  
AGCCTCATGCGTTTCGCTTACCTAGACGACATCGTGGTAATAGGAGCGACGAAAACACAGCATGTAGAGAA  
TTTGAGGGAGGTATTCCGCCGGCTAAGGGCGGCCAATCTCCGGTTAAATAGGAAAAAATGCAGCTTCTTC  
CGGGAGAGGTTAGTCTACCTAGGACATGTAATTTGCGGAGAAGGGATACGGACCGATCCGGAGAAAGTG  
GAGGCGATACGAAACCTGAGGGCCCCAACAAATTGCAAAGAACTGCGACAGTGTCTCGGGATGGCGTCA  
TGGTACAGGCGTTTCGTACCCAATTTTCGCGACCCAGGTACAGCCACTCACAGCGCTCTTAAAGAAGGGGC  
AGAAATGGGCATGGGAGCAAGAACAGGAGGAGGCATTGCGTCAATTGAAGGAGAGCTTGACGACTGCCC  
CTGTGTTGGCTTGCCCCGACTTTTCCGCCAAGTTCGTCTTGCAGACTGACGCGAGTGAGTATGGCCTCGGT  
GCAGTGCTGACGCAGACGATCGATGGACAAGAGCGGGTGATAGCATACGCGAGCCGAAAGTTGCTGAAG  
GCCGAGGTAAACTATTCCGCCACTGAGAAAGAGTGCCTGGCAATCGTGTGGTCGATCCGGAAGTTGCGTT  
GCTACCTAGAAGGGTACCGATTTCGACGTAATAACGGACCATCTAGCGCTCAAGTGGCTGAATTTCGATCGA  
GAGCCCGTCAGGAAGGATTGCGCGATGGGCATTGGAAGTGCAGCAATTCCAATTTGACGTTTATTATCGT

CGAGGGAAGCTCAACGTCGTGGCCGATGCCCTGTCGAGGCATCCTCTAGAGACCTGTCAACAAGCAGTGG  
TGGCCGAGGCCCCCTGCAAATGGGTTCGCGAGGATGCGTGTTAGAATCGCCGAAGAGCCAGCCAAGTTC  
GATTACACCGAGGAAAACGGACAGCTATATAGGCATTTGGGTACCGGATAGACGATGAGGACTACATCC  
CTTGAAACTATGCGTAGGCAGTGGTCAACGCCAGAGGGTACTGCGGGAATGTCATGATGCTCCACGGC  
CGGACATCAAGGTGTCAGAAAAACGGTGGCGAGGTTAGCCCAGCGGTACTACTGGCCGGGTATGTTCCGC  
GATGCCGCCAGATACGTGAAATGTTGCGAAGACTGCCAAAAATTCAAGAGTGAGCAACTCAAACCGGCT  
GGTCGCATGCTGACGAGGCAGGTGGCAGAGCCGATGGCGGTACTTTGCGCGGACTTCGTCGGACCCCTTC  
CACGGTCGAAACATGGAAACACGATGCTATTGGTGTTCCATGACGCTTTCTCGAAATGGGTGGAGTTGGT  
CCCTCTCAGAAGAGCCACGGCAGCACACCTGCAAACCTGCGTTTCGAGAGAGGATTCTAAGTAGGTTCCGG  
GTACCTAGAAAGTTTGTGTGCGACAACGGGGTACAATTTACGAGTCGGAGCTTCAAGTCATTTTTGGGGT  
CCTGGGTGTAGAGATCCAGTATACCGCCCCGTACTGTCCGCAAGAGAATCCCACTGAGAGGACTAACCGG  
ACTGTAAAGACCATGATAGCGCAATTTATTGAGGGCCACCAGAGTTCATGGGATGAACTCTTGCCCGAGA  
TCTCGCTGGCGGTCAACACGAGCGTGGCAGATTCAACGGGCTTTAGTCCCGCTTTCCTGATGCAGGGCAG  
GGAACCTCGGTTACCCGCAGCTCTGTACGATCAGGTAACCTCCGGGGTCCGCAACTAGTGCGCTCGACCT  
AGGACAAAGGCGGATAGGCTAAAAGAAATTTTTGAATATCGTCCACAGCAACCTCCAGCGCGCATCAAA  
GGACCAGGGCAGGCATTACAACCTTGCGGAGACGAGAGTGGCGGCCCTCGTTGGACTCGATGGTCCTGTTG  
AGGCAGCACCAGTTGTCCAACGCTGCCGAAGGTTTCGCCGCAAAGTTGGCACCCAAATTTGACGGCCCT  
ACAAAGTCGTCAAATTCATATCCCCCAATATTGTGCGGCTGGTGAAATCAGACGACCGCAAGAAGAGGGT  
GGCCAACATCTCACAATTGAAACCATTTACAGAAAGACGACGAGCGACGAAGAAGACGAAGATCCAGG  
GCACGCAAATGCCACGAGTAAGCGAAGGATGAGAGCAACACCCGTCGCCAACGAACTATTATGATT  
AAGCTTAGATAAACTAACATTAACAACATAATTCAGAATAGGCATAGTAAAGTGTGAGCCGCACTGAGA  
GAATAGGGCATTAAACAATAAGTAAAGAGTAAGTTAACCAATAAGCTGAACTTTCAGATGGAACCCGAA  
GTTATCGNCATATCGTCAGACGAAGACAACAGCAGCGGGGACACCGAGCCTTTCCCCGGGCCGGGAGCC  
GCAGGCCGTCCGCGCGACCCACGCCAGGGGCGTGAGTACTATCGAAGAGAACGGCAAGAAGGACCGCCT  
CGCCAGTTCCGCCATACACTATTCTCCCGGCGGACCGGCATAATGGAGAGGCTAGACGGGATGGTCTTGC  
TGATGGCAGTCGAGGTCACGACAATGTTCTGTGGAGGCACCGTTCGCCCGGAACTCGCCACCGTACGCGGA  
AGAGCCTGCATCTCCGCCCTCGCATCCCACTCGGCACAATCATCAGAGCCGGCAACCCCAACCGCGGCC  
GGCGAGATGGACGAGGAAGAGTCCGCACCGTTTCGGAACGGAGGAGCACACACCACCAGCGCAGGACGTG  
GAGGCGGTAGGAGAAGAGATATCCCCGTCGGCCGGAGACGCGGAGTCGCCACCGACGGAGGTGCCGAAC  
GGCACCCGCGCAAACGACGGGGAAGCAGACCCGCTGAGCCTCGACCCAGAACCCTTAGTGAGGGGGAC  
CCGTCAACGGAGGACGAGCCGGAATTCCGTGCGCGCTTTGCCACCCACCGTCTGGAGGTAGACCCGGGCA  
GCCAGTTTCCAGGATAACGCTGCGGTACCTACCAAAAGTCCCCGCGGTAGCCAACAAACCCCGTCTGAA  
CCCCGCAAAGCGCGAATGGGGGTGCCGAAGAAGGCCCGGCGGAAAGCGCCGACGCAGCCGCCATCGTC  
GACGGAGAGCCGCCAGGGGCGAGCGTCGCCGGAGTGAGAGGCCATCGCCGACCCAGTCCCGAGGGAGCAT  
CCTCGTCGGCCACGAAGAGGCTTCGCACGGAGACCGAGAAGCCCGAAGGATCGCAGCGGTGCGTGCCGC  
GTTTCGCCCGCGAGCGCCAGGAGGGTCTCCCCAGCTCGGGAAGGATAACCGCCGCTGCCAGATCGCTTC  
TCGAGGAGGGCATCCCGAACCTGGCCGATACCGATTGCGGTCTGCCAGATGGTCTGTGGAGGAGCACCAT  
CTCAGCACCAAGGACGCGGCGAACTCGGCCGTTTCCCCAGCCCGCGCCGAGGCGCCAGACGAAACCTTTC  
CTAAGGAATCGGAGGAGGAGTGCTCGACGACGAGGACGAGATGCCCGCGCTCGTGCCTATTGCCCGCG  
CCGAGACACCCGACACCATCGCCCGGCGGGAGTTAGAAGACGCCTGGTTTCGGCCAAGAAGGCAAGGCGC  
CATCCCGAAAAGGTTTCCTTCACGGTTCGCCAGGAAGGCCGGGATGAAGTCTGGTCCGAGGAAGAGGACG  
CGGTGGTGACGGCTTCGTGCCCAAGCTTTCGAGTCCAACCCAGGATTCCTCCCCCATGGCTCTAAAGACT  
CCCACGGAGAGCGAGTTGTGGGACGACATAGTGGACCTTTTCGACGGCATCGACGGGTGGGACACTAGCC  
TGGACTCAGTGCTGGAGGAGGAACCCGACACCGAGGTCGACACGGTCGCCCGCAGTGCCGACGTGAGGG  
TCACACCGGAGAGCCACCCCAAGAAACCCGACACCGAGGTCGAGGCGATCGCCACAGTGCTGACGTTG  
GGGTAAAACCGGAGGGCCCCGTCGAGGAACCCGTGCCCGATTCCACCCCTCAGGCTGGAAGGTGTTTCC  
TCTTGGAACACCGTTGTCTCGGGCGTGGTGGACCTAATCGCCAGAGAGGCGCGAATCCGCCGCTTCCGG  
TGCCGACGTACTCGGTTCCACGTGTCCGACGGGGAGAGCGAGTACAGCGTTACGCTGAACGCGAAAGGCG  
ACGTGACCGTCACCTGTCCGAAGTGAGGGGGGGGGCGGCTAAGGAGACCAGCCACCCACAGTTTTTCACG  
GCAAGGAGCCGTCATCCCTTTGGCCAAATTACGGCAAGGAGCCGCTGGCGGGACAACGCATTAATTTTCT  
TTAGTTATAAGTATTAATTATATTAGGTTAAGATCTTAGTGAAATAAGAGGCAAGGAGCCATCAGTAATA  
TAAGCAGTTTCGATTAGTAGCAAAGAGGCAAGGAGCCGCGAATATTATAATTGATTTAAATAGTGAGTTTG  
AATTTAACCGCCGGCCGCGCTGCAACCGTGCGTTGTTCGATCGGTTGCTCAACACCGTCTTTGAGAGCGCA  
ACTTCAATTCGGCGGCGAAGAGCGAAAGCTCCGAGGCGAAGTTGCGAAAGCTCGCGGCGAAGTTGAGCA

GCCGAAGCGAGCGCATGGCTTGCCGGCGAGCGTGCCGGCACTTGTGATCGAACGTTAAGGGTGAGTAGA  
AGTGCTGCGCGAGATAAACGAAATCATAGATGGTATAGTGGAGCGCTAGGGCTCCAGAAAACAGTGCGG  
CAGGGTTTAGCTTAGGATTTACGATAAGGTCGGAATGAATAATAGTGAATAAAGTGCCAACGTTGTAATT  
ATCTAGAAAGTATTGGATTATTCCTGTTTCCTGGTAACCCGGCTTACCTTAACATCGGAACTAACCGGTG  
TTCGACCTAACCTCGAACGAGGGGCATGCGGTACGAGATCGTGGGCTCCGGGGTGGGCATTGCCGGTTGGT  
GTTTAGGTAGTGGAGTTGGTGCGAGGGCCACGGCCCGCTAGTGTAGTTGGTGCGAGGGCCACGGCCCGCTAG  
CGTAGTGGTACGAGGGCCACGGCCCGGCAGAAAGATAGAGCGTTTAGGTAGTGGAGTTGGTGCGAGGGCCA  
CGGCCCGCTAGTGTGGTTGGNGCGAGGGCCACGGCCCGCTAGCATAGATGGTACGAGGGCCACGGCCCGAC  
GGNGTAGGTGTGTAGAGGTAGATCTGGGTTTGGTTTGGTCAGGATACTACCCCCCTTTAAGCCCTCTCTC  
CCAGCGAAATTATAAATAACTTGTAACCTCGCTAGACCTGGTAAGACTGAGAATTATACCCCGGCCGGAAG  
CTTCCTTACA

>9\_rnd-1\_family-231\_\_LTR\_\_Gypsy

AAACTAAAAAGGAACCAAAGTGGCTGAGCAAGATCGGGCGTAAAAAGTGANAAGACACCAACACCAAGA  
AAAGGAGAGAGGAATAGTAAAGGGACCGACGGAACCCCTAGAACGGGAAGAGAGGGAAACAGCGACGT  
CGACTAGCAAGGAAGTATACAATAAAGGATGGAGGCAGGTGAGTGCCAAAAACCCGGGGGTAGGCGTCC  
GCTGGATTACACCAGCGACGCAAAGAGGAGTTAGTGGCGATCGCCCAGGAGTTTGGGCTGGAAAAGGAGG  
GGCGCGTGGAGGAGCTACGTAAGCGGGCTGTCCACCTACGTGCAGGAGGGCGGTTCATTCGNCTGGGATTTG  
GGCTCGGCTCGCCGAGCTGGAATCCCAGTATGCTAAACTCTTGAGCCGCCATCTTGGGGCGTCCCACCC  
GACTTTGGTGGACGGCCACGGCAAAAGTCGGAACCTGACCTCAGAAGCTCCAGCTGTACGGNCTTTTGC  
AGGCGCCACCCCGAGTTTGACCGTCTCGGGCGTGGAGGCAGTTTCTGCTCTCGGTGGAAATGAAGACCG  
CCGAGCAACTGCGGTCAACGCAGAGGTGGGGAGGTCCCTGTTGAACCGGGTGGTGGTCCCTGCTACACT  
AGGCCGCACCATCCATCGGAGGGCGAGGCCACTTCCCAATGTCCCGGAGCAAGTTCGGAAGTGGGGTATGA  
GGTACGATGGACGCTCCGACCCCTTGGGTTCTTAGAGGACCTCGAGGAGCGCGCTATCACCTATGGTAT  
AGCCCTCGACCGTATGCCCAGGGCAATGAGCGAGGTGTTCTGCGATAGGGCTGCTCGTTGGTTTCTGAGC  
AGTGGGCTAAGGGATGTGCCGTGGGCCGTGTTTAGGAGGGATTTCTTGAGTTTTTCTTGCCCCCTCGTTA  
CTTCGAGAGGCTTGAGGACGAGATCCGATCCCGGAGGCAGCGCGTAGGTGAAGCGTTCAAGGAATATTTG  
ATAGAGCTGAGGGCTCTTATGCACCACGCTAGATACGAGCCGGCACAAGAGCTGCATCGGATCTACGAGA  
ACGCCGCTCCGGAATACAGGCTCTATGTGCGACGGCAAGACTTTTCTACCCTATCCAGCTAACTCAACTG  
GCCGTAGAATACGAGACCGTCGTGAGGCAGAGGGCGGAGTACTCAGGCAGCCAACCCCTTGGGTGAGGGT  
GTCTCTAGTTCAAATAGTGCAGAGTGGGCGAGGACGGCGCAGTCCTCGGGACATCTCAATCCGTTCCGGT  
CTGCTCCCAGCGGATCCGGGACGACCGTTGTGGACAACAGGGTCTCCACCCACCCGCTGCAACTCACGC  
AGAGGTGGCCCATCAGATGATGAGCCAAGAGGGCCGGAACGGATATGATCCGCGACGGGCGTGTCTGAG  
GTGCGCACAGGAGGGGCATTTTGCCAGGGAATGTCCCAACGCCCTGTCTTATTTTGTGTTGGGTATGTGGAA  
GCCGGGGCCGAAGTAGTCGGGAGTGTTGCCGCCGCGCGGAGACGGGAAACGGGCAACGGCGTCTGTCGG  
ACCAGGATCGGGTCGGCGCCAATACACGCGGAACGCAGCAATAGGACACCCACTGAAGGTGGACGGTGG  
CCGGATCGTCTGCTACGGTAGAGATTGGCGGACGAACGATGCCCGCCACGATCGATACCGGAGCCACTCGT  
AGCTTCATGAGTGAGGACTGCGTACGCAAATGGACGATCCGGGGGAAGAGCGGAGGAAATACAGGCACGT  
ATCCGCCTGGCAGATGGGTCCACCCTAGAGGNGGAAAAGGCTTTGAGAGTAGACGCCAGCTTAGGGGAA  
AAACGATCAGCATGACGATGCTCATCATGCCCTCAATGCTGGACCATGTAATCCTGGGTATGGATTTTTTG  
GGGCGATGAATACCACAATACGCTGCGGCGAGGGCGGAACCTGGTCCTAGAAGCAGCGACGACACCGGGCG  
TGAGGCCAGGAACGAGCGAGGAGTCGGAGGAAGGCCGCCCAAGGCATGAAAAGGGAGCACCTGCTCGG  
CTACAGAGGGAGCCGGAGGAAGGCCTCCCAAGGCATGGAAAGGGAGCACCTGCTCGGCTACAGAGGGAG  
CCGGAGGAAGGCCTCCCAAGGCATGGAAAGGGGAGCACCTGCTCGGCTACAGAGGGAGCCGGAGGAAGGC  
CTCCCAAGGCATGAAAAGGGAGCACCTGCTCGGCTACAGAGGGAGCCGGAGGAAGGCCTCCCAAGGCAT  
GGAAAGGGAGCACCTGCTCGGCTACAGAGGGAGCCGGAGGAAGGCCTCCCAAGTCATGAAGGGGGCACC  
TGCTCGGCTACAGAGGGAGCCGGAGGCAGGCCTCCCAAGTCATGAGAAGGGAGCACCTGCTCGGCCTTCG  
ACGGAAAAGGTCAGGGAAAGGGGAGTAAAGTCCGGCCCGAATCGACAGCCTGGAGAACCCAAGAGGTG  
GCGCATAGAGCTGCAGAGGCAGACTTCTAATGGCTACGGAAGCGGCACGGCGGGAACGTGCAAGAGAAA  
GGACGGAGTAGGAGCGATGACCAGAATCCACACGGACATAGAAGGCCAGGAGCGATCGCCAGAATCGAG  
CGGCCACGGAGTTCTGTCTGGAGTCGAAGTGGTCCCAGGAGGGGGCGATAACGGCATCGAAGAGGCGGA  
TTGGCCAGCGGGTCTGGACCCAGAACTGAGGGAGTTCTTGAGTACAGAGCTGGTCTCTTCGAGGGGCTG  
CAGGGAATCTCGCACATCGCGGAGCACCGAATCCGGCTGAAGGATGACAAGCCGTTGAAACAAAGGTAC  
TACCCCAAGAATCCGGCCATGCAGAGGGTGATCGACGAGCAAGTGGATGAGTTGATCCGGGCAAATGCC  
ATCGAGCCGTCGCGTAGTCCGCACAGCGCCCCGATCGTCTTGGTCAAGAAGAAGACTGGCGAGTGGCGTA

TGTGCATTGACTACCGACAACCTCAACGCGCATTCCATTCCGGACGCTTATCCGGTGCCTCGTATTAACAC  
ATCCTGGAGCGGTTGCGCCACGCCCCGGTTCATCTCCACTCTGGATTGTAAGCACGGGTACTGGCAGATACC  
GATGGCAGCCGATAGCCGGGAGTGTACGGCGTTCACAGTCCCTGGAAGAGGTCTTTTCCAATGGCGGGTG  
ATGCCATTTCGGCTTACACTCGGCGTGTGCGACATTCCAGCGCGCTTTGGATACGGTAATAGGGCCGCGAGA  
TGGAGCCTCATGCGTTCGCTTACCTAGACGACATCGTGGTAATAGGAGCGACGAAAAACACAGCATGTAGA  
GAATTTGAGGGAGGTATTCCGCCCGGCTAAGGGCGGCCAATCTCCGGTTAAATAGGAAAAAATGCAGCTTC  
TTCCGGGAGAGGTTAGTCTACCTAGGACATGTAATTTGCGGAGAAGGGATACGGACCGATCCGGAGAAA  
GTGGAGGCGATACGAAACCTGAGGGCCCCAACAATTGCAAAGAACTGCGACAGTGTCTCGGGATGGCG  
TCATGGTACAGGCGTTTCGTACCCAATTTTCGCGACCCAGGTACAGCCACTCACAGCGCTCTTAAAGAAGG  
GGCAGAAATGGGCATGGGAGCAAGAACAGGAGGAGGCATTGCGTCAATTGAAGGAGAGCTTGACGACTG  
CCCCTGTGTTGGCTTGCCCCGACTTTTCCGCCAAGTTCGTCTTGACAGTACGCGAGTGAGTATGGCCTC  
GGTGCAGTGCTGACGCAGACGATCGATGGACAAGAGCGGGTGATAGCATAACGCGAGCCGAAAGTTGCTG  
AAGGCCGAGGTAAACTATTCCGCCACTGAGAAAGAGTGCCTGGCAATCGTGTGGTCGATCCGGAAGTTGC  
GTTGCTACCTAGAAGGGTACCGATTTCGACGTAATAACGGACCATCTAGCGCTCAAGTGGCTGAATTTCGAT  
CGAGAGCCCGTCAGGAAGGATTGCGCGATGGGCATTGGAAGTGCAGCAATTCCAATTTGACGTTTATTAT  
CGTCGAGGGAAGCTCAACGTCGTGGCCGATGCCCTGTCGAGGCATCCTCTAGAGACCTGTCAACAAGCAG  
TGGTGGCCGAGGCCCCCTGCAAATGGGTGCGGAGGATGCGTGTAGAAATCGCCGAAGAGCCAGCCAAGTT  
CCCGGATTACACCGAGGAAAACGGACAGCTATATAGGCATTTGGGTACCCGGATAGACGATGAGGACTA  
CATCCCTTGGAACCTATGCGTAGGCAGTGGTCAACGCCAGAGGGTACTGCGGGAATGTCATGATGCTCCC  
ACGGCCGGACATCAAGGTGTCAGAAAAACGGTGGCGAGGTTAGCCCAGCGGTACTACTGGCCGGGTATG  
TTCCGCGATGCCGCCAGATACGTGAAATGTTGCGAAGACTGCCAAAAATTCAAGAGTGAGCAACTCAAAC  
CGGCTGGTCGCATGCTGACGAGGCAGGTGGCAGAGCCGATGGCGGTACTTTGCGCGGACTTCGTTCGGACC  
CCTTCCACGGTCGAAACATGGAACACGATGCTATTGGTGTTCATGACGCTTTCTCGAAATGGGTGGAGT  
TGGTCCCTCTCAGAAGAGCCACGGCAGCACACCTGCAAACCTGCGTTTCGAGAGAGGATTCTAAGTAGGTT  
CGGGGTACCTAGAAAGTTTGTGTGCGACAACGGGGTACAATTTACGAGTCGGAGCTTCAAGTCATTTTTG  
GGGTCCCTGGGTGTAGAGATCCAGTATACCGCCCCGTACTGTCCGCAAGAGAATCCCCTGAGAGGACTA  
ACCGGACTGTAAAGACCATGATAGCGCAATTTATTGAGGGCCACCAGAGTTCATGGGATGAACTCTTGCC  
CGAGATCTCGCTGGCGGTCAACACGAGCGTGGCAGATTCAACGGGCTTTAGTCCCGCTTTCCTGATGCAG  
GGCAGGGAACCTCGGTTACCCGCAGCTCTGTACGATCAGGTAACCTCCGGGGTCCGCAACTAGTGCGCTCG  
ACCCTAGGACAAAGGCGGATAGGCTAAAAGAAATTTTTGATATCGTCCACAGCAACCTCCAGCGCGCATC  
AAAGGACCAGGGCAGGCATTACAACCTTGCGGAGACGAGAGTGGCGGCCCTCGTTGGACTCGATGGTCTCTG  
TTGAGGCAGCACCAGTTGTCCAACGCTGCCGAAGGTTTCGCCGCAAAGTTGGCACCCAAATTTGACGGCC  
CCTACAAAGTCGTCAAATTCATATCCCCCAATATTGTGCGGCTGGTGAAATCAGACGACCGCAAGAAGAG  
GGTGGCCAACATCTCACAATTGAAACCATTCTACAGAAAGACGACGAGCGACGAAGAAGACGAAGATCC  
AGGGCACGCAACTGCCCACGAGTAAGCGAAGGATGAGAGCAACACCCGTCGCCCAACGAACTATTATG  
ATTAAGCNTAGATAAAACTAACATTAACAACATAATTCAGAATAGGCATAGTAAAGTGTGAGCCGCACTG  
AGAGAATAGGGCATTAACAAATAAGTAAAGAGTAAGTTAACCAATAAGCTGAACTTTCAGATGGAACCC  
GAAGTTATCGNCATATCGTCAGACGAAGACAACAGCAGCGGGGACACCGAGCCTTTCCCCGGGCGCGGA  
GCCGCAGGCCGTCCGCGCGACCCACGCCAGGGGCGTGAGTACTATCGAAGAGAACGGCAAGAAGGACCG  
CCTCGCCAGTTCCGCCATACACTATTCTCCCGCGGACCGGCATAATGGAGAGGCTAGACGGGATGGTCT  
TGCTGATGGCAGTCGAGGTCACGACAATGTTTCGTGGAGGCACCGTTCGCCCGGAACTCGCCACCGTACGC  
GGAAGAGCCTGCATCTCCGCCCCCTCGCATCCCACTCGGCACAATCATCAGAGCCGGCAACCCCAACCGCG  
GCCGGCGAGATGGACGAGGAAGAGTCCGCACCGTTTCGGAACGGAGGAGCACACACCACCAGCGCAGGAC  
GTGGAGGCGGTAGGAGAAGAGATATCCCCGTCGGCCGGAGACGCGGAGTCGCCACCGACGGAGGTGCCG  
AACGGCACCCGCGCAAACGACGGGGAAGCAGACCCGCTGAGCCTCGACCCAGAACCCTTAGTGAGGAGG  
GACCCGTCAACGGAGGACGAGCCGGAATTCCGTCGCGCGCTTTGCCACCCACCGTCTGGAGGTAGACCCGG  
GCAGCCAGTTTCCAGGATAACGCTGCGGTACCTACCAAAAGTCCCCGCGGTAGCCAACAAACCCCGTCT  
GAACCCCGCAAAGCGCGAATGGGGGTGCCGAAGAAGGCCCGCGGAAAGCGCCGACGCAGCCGCCATC  
GTCGACGGAGAGCCGCCAGGGGCGAGCGTCGCCGGAGTGAGGAGCCATCGCCGACCCAGTCCCGAGGGAG  
CATCCTCGTCGGCCACGAAGAGGCTTCGCACGGAGACCGAGAAGCCCGAAGGATCGCAGCGGTGCGTGC  
CGCGTTCCGCCCGCGAGCGCCAGGAGGGTCCTCCCCAGCTCGGGAAGGATAACCGCCGCTGCNAGATCGC  
TTCTCGAGGAGGGCATCCCGAACCTGGCCGATACCGATTGCGGTCTGCCAGATGGTCGTGGAGGAGCAC  
NATCTCAGCACCAAGGACGCGGCGAACTCGGCCGTTTCCACAGCCCGCGCCGAGGCGCCAGACGAAACCT  
TTCTAAGGAATCGGAGGAGGAGTGGCTCGACGACGAGGACGAGATGCCCGCGCTCGTGCCTGTTGCCCG

CGCCGAGACACCCGACACCATCGCCCCGGCGGGAGTTAGAAGACGCCTGGTTCGGCCAAGAAGGCAAGGC  
GCCATCCCGAAAAGGTTCTTTCACGGTTCGCCAGGAAGGCCGGGATGAAGTCTGGTCCGAGGAAGAGGA  
CGCGGTGGTGACGGCTTCGTCGCCCAAGCTTTCGAGTCCAACCCAGGATTCCTCCCCCATGGCTCTAAAGA  
CTCCACGGAGAGCGAGTTGTGGGACGACATAGTGGACCTTTTCGACGGCATCGACGGGTGGGACACTAG  
CCTGGACTCAGTGCTGGAGGAGGAACCCGACACCGAGGTCGACACGGTCGCCCCGAGTGCCGACGTGAG  
GGTCACACCGGAGAGCCACCCCAAGAAACCCGACACCGAGGTCGAGGCGATCGCCCACAGTGCTGACGT  
TGGGGTAAAACCGGAGGGCCCCGTCGAGGAACCCGTGCCCGATTCCACCCCTCAGGCTGGAAGGTGTTTC  
CTCTTGGAACACCGTTGTCTGTCGGGCGTGGTGGACCTAATCGCCAGAGAGGCGCGAATCCGCCGCTTCCG  
GTGCCGACGTACTCGGTTCCACGTGTCCGACGGGGAGAGCGAGTACAGCGTTACGCTGAACGCGAAAGGC  
GACGTGACCGTCACCTGTCCGAAGTGAGGGGGGGGGTGTGAGGCGGCTAANGAGACCAGCCACCCACAG  
TTTTACGGCAAGGAGCCGTCATCCCTTTGGCCAAATTACGGCAAGGAGCCGCTGGCGGGACAACGCATT  
AATTTTCTTTAGTTATAAGTATTAATTATATTAGGTTAAGATCTTAGTGAAATAAGAGGCAAGGAGCCATC  
AGTAATATAAGCAGTTCGATTAGTAGCAAAGAGGCAAGGAGCCGCGAATATTATAATTGATTTAAATAGT  
GAGTTTGAATTTAACCGCCGCGCCGCGCTGCAACCGTGCGTTGTTCGATCGGTTGCTCAACACCGTCTTTGA  
GAGCGCAACTTCAATTCGGCGGCGAAGAGCGAAAGCTCCGAGGCGAAGTTGCGAAAGCTCGCGGCGAAG  
TTGAGCAGCCGAAGCGAGCGCATGGCTTGCCGGCGAGCGTGCCGGCACTTGTGATCGAACGTTAAGGGTG  
AGTAGAAGTGCTGCGCGAGATAAACGAAATCATAGATGGTATAGTGGAGCGCTAGGGCTCCAGAAAACA  
GTGCGGCAGGGTTTAGCTTAGGATTTACGATAAGGTCGGAATGAATAATAGTGAATAAAGTGCCAACGTT  
GTAATTATCTAGAAAGTATTGGATTATCCCTGTTTCCTGGTAACCCGGCTTACCTAACATCGGAATAA  
CCGGTGTTTCGACCTAACCTCGAACGAGGGGCATGCGGTACGAGATTGTGGCTCCGGGGTGGGCATTGCCG  
GTTGGTGTTTAGGTAGTGGAGTTGGTGCGAGGCCACGGCCCGCTAGTGTAGTTGGTGCGAGGCCACGGCC  
CGTAGCGTAGTGGTACGAGGCCACGGCCCGGCAGAAAGATAGAGCGNTTAGGTAGTGGAGCTGGTGCG  
AGGCCACGGCCCGCTAGTGTAGTTGGTGCGAGGCCACGGCCCGCTAGCATAGTGGTACGAGGCCACGGCC  
CGGCGGAGAGATAGGGTGTTTAGGTAGTGGAGTTGGTGCGAGGCCACGGCCCGCTAGTGTGGTTGGAGCG  
AGGCCACGGCCCGCTAGCATAGATGGTACGAGGCCACGGCCCGATGGTGTAGGTGTGTAGAGGTAGATCT  
GGGTTTGGTTTGGTCAGGATACTACCCCCCTTTAAGCCCNCTCTCCAGCGAAATTATAAATAACTTGTA  
CTCGCTAGACCTGGTAAGACTGAGAATTATACCCCGGCCGGAAGCTACCTTACA

>160\_rnd-1\_family-0\_\_Unknown

TTTGGAACGTCATATCTCCGCGCGGAGATATGNCGTTTCGAAACGNCATAACTCCCCGCGATATGNCGTTC  
CGGANCGTCATAAATATCTCCGCGNAGATAATGTCTGATTTGTTNAAAGCTTATACCTTTTTTGCCAATGCG  
TACGGATCCGTACCATCCAAAAGGTATAGCATTTCGAACGAATTAATCATCACGAGATATTAATAAAAAAAT  
CGTCGAAAAAGTTTCGATTTTCGCGCCGAACCTCGAGTTNTGTCGTTTTTGGAACGTCATATCTCCGCGCGG  
AGTTATGTCGTTTTGGAACGTCATATCTCCGCGCGGAGTTATGTCGTTTTGGAACGTCATATCTCCGCGCGG  
GAGTTATGACGATTTGGAAGGTCATATCGCGNGGAGTTATGTCGTTTCGNAACGTCATATCTCCGCGCGG  
AGCTATGTAACCCCTTGCCATTTTGTTCGATTTGGGTCAAATTTTGGAATTCCTTTTTTGTATGCCAATCGA  
TAGAACTGATCCTTACGAGTCAAAAATGGTATAAAAATTCCAAATCGGACATTATTTGACGGAAATATTC  
CAAAAAATCATCAAAAAAGGTTGAATTTACGAACGAATCGGTTTTTTGTCAACAACATTTTTCAACCCATC  
GATGATTAATTTGTTTGAATGCCAATTGATGGTAGGGATCCGTACGCATTCAAAAAGGTATAACATTTTAA  
AATCAGACATTATTTACCCGAGATATTANAAAAAATCATCGAAAAAGTTTCGATTTTCGCACCGACCTC  
GATTTTGAAAAAAAACGTGATGATTTGGAAGGTCATATCTCCGCGCGGAGTTATGTCGTTTTGGAACGTC  
TATCTCCGCGCGGAGNTATGTCGTTTTGGAACGTCATATCTCCGCGCGGAGCTATTACCCGAGATATTA  
AAAAATCATCGAAAAAGTTTCGATTTTCGCACCGACCTCTATTTGAAAAAACGTGATGTAACCCCTTGC  
CATTTTGTTCGATTTGGGTCAAATTTTGGAATTCCTTTTTTGTATGCCAATCGATAGAACTGATCCTTACGA  
GGTCAAAAATGGTATAAAAATTCCAAATCGGACATTATTTGACGGAAATATTCAAAAAATCATCAAAAA  
GGTTGAATTTACGAACGAATCGGTTTTTTGTCAACAACATTTTTCAACCCATCGATGATTAATTTGTTTGAA  
TGCCAATTGATGGTAGGGATCCGTACGCATTCAAAAAGGTATAACATTTTAAAATCAGACATTATTTACCC  
GAGATATTAATAAAAAAATCATCGAAAAAGTTTCGATTTTCGCACCGACCTCGATTTTGAAAAAATCGTG  
ATGATTTGGAAGGTCATATCTCCGCGCGGAGTTATGTCGTTTTGGAACGTCATATCTCCGCGCGGAGTT  
GTCGTTTTGGAACGTCATATCTCCGCGCGGAGTTATGTCGTTTTGGAACGTCATATCTCCGCGCGGAGTT  
ATGTCGTTTTGGAACGTCATATCTCCGCGCGGAGCTATGTCGTTTTGGAACGTCATATCTCCGCGCGGAGT  
TATGTCGTTTTGGAACGTCATATCTCCGCGCGGAGTTATGTCGTTTTGGAACGTCATATCTCCGCGCGGAG  
CTATTACCCGAGATTTTGGAACGTCATATCTCCGCGAAAGTTTCGATTTTCGCACCGACCTCGATTTTGAA  
AAAAATCGTGATGATTTGGAAGGTCATATCTCCGCGCGGAGTTATGTCGTTTTGGAACGTCATATCTCCGCG



GCGGAGTTATGTCGTTTTGGAACGTCATATCTCCGCGCGGAGCTATGTCGTTTTGGAACGTCATATCTCCG  
CGCGGAGTTATGTCGTTTTGGAACGTCATATCTCCGCGCGGAGTTATGTCGTTTTGGAACGTCATATCTCC  
GCGCGGAGTTATGTCGTTTTGGAACGTCATATCTCCGCGCGGAGTTATGTCGTTTTGGAACGTCATATCTC  
CGCGCGGAGTTATGTCGTTTTGGAACGTCATATCTCCGCGCGGAGTTATGTCGTTTTGGAACGTCATATCT  
CCGCGCGGAGCTATGTCGTTTTGGAACGTCATATCTCCGCGCGGAGCTATGTCGTTTTGGAACGTCATATC  
TCCGCGCGGAGTTATGTCGTTTTGGAACGTCATATCTCCGCGCGGAGTTATGTCGTTTTGGAACGTCATAT  
CTCCGCGCGGAGCTATGTCGTTTTGGAACGTCATATCTCCGCGCGGAGCTATTACCCGAGATATTA  
AAAAA  
AAATCATCGAAAAAGTTTCGATTTTCGCACCGACCTCGATTTTGAAAAAAACGTGATGTAACCCCTTGCC  
ATTTTGTCGATTTGGGTCAAAATTTTGGATTTTCCTTTTTTTGATGCCAATCGATAGAACTGATCCTTACGAG  
TCAAAAATGGTATAAAATTCCAAAATCGGACATTATTTGACGGAAATATTCCAAAAAATCATCAAAAAGG  
TTGAATTTACGAACGAATCGGTTTTTTGTCAACAACATTTTCAACCCATCGATGATTAATTTGTTTGAATG  
CCAATTGATGGTAGGGATCCGTACGCATTCAAAAAGGTATAACATTTTAAAATCAGACATTATTTACCCG  
AGATATTA  
AAAAA  
AAATCATCGAAAAAGTTTCGATTTTCGCACCGACCTCGATTTTGAAAAAAATCGTGA  
TGATTTGGAAGGTCATATCTCCGCGCGGAGCTATGTCGTTTTGGAACGTCATATCTCCGCGCGGAGTTATG  
TCGTTTTGGAACGTCATATCTCCGCGCGGAGTTATGTCGTTTTGGAACGTCATATCTCCGCGCGGAGTTAT  
GTCGTTTTGGAACGTCATATCTCCGCGCGGAGTTATGTCGTTTTGGAACGTCATATCTCCGCGCGGAGCTA  
TGTCGTTTTGGAACGTCATATCTCCGCGCGGAGCTATGTCGTTTTGGAACGTCATATCTCCGCGCGGAGTT  
ATGTCGTTTTGGAACGTCATATCTCCGCGCGGAGNTATGTCGTTTTGGAACGTCATATCTCCGCGCGGAGN  
TATGTCGTTTTGGAACGTCATATCTCCGCGCGGAGNTATGTCGTTTTGGAACGTCATATCTCCGCGCGGAG  
NTATGTCGTTTTGGAACGTCATATCTCCGCGCGGAGNTATGTCGTTTTGGAACGTCATATCTCCGCGCGGA  
GCTATTACCCGAGATATTA  
AAAAA  
AAACATCGAAAAAGTTTCGATTTTCGCACCGACCTCTATTTTGAAAA  
AAAGCGTGATGTAACCCCTTGCCATTTTGTCGATTTGGGTCAAAATTTTGGATTTTCCTTTTTTTGATGCCAA  
TCGATAGAACTGATCCTTACGAGTCAAAAATGGTATAAAATTCCAAAATCGGACATTATTTGACGGAAAT  
ATTCCAAAAAANCATCAAAAAGGTTGAATTTACGAACGAATCGGTTTTTTGTCAACAACATTTTCAACCC  
ATCGATGATTAATTTGTTTGAATGCCAATTGATGGTAGGGATCCGTACGCATTCAAAAAGGTATAACATTT  
TAAAATCGGACATTATTTACCCGAGATATTA  
AAAAA  
AAATCATCGAAAAAGTTTCGATTTTCGCACCGACCT  
CGATTTTGAAAAAAATCGTGATGAAGTCGATCTCCGCGGGGAGTTCTGTCGTTTTGGAACGTCATATCTCC  
GCGCGGAGTTATGTCGTTTTGGAACGTCATATCTCCGCGCGGAGNTATGTCGTTTTGGAACGTCATATCTC  
CGCGCGGAGNTATGTCGTTTTGGAACGTCATATCTCCGCGCGGAGTTATGTCGTTTTGGAACGTCATATCT  
CCGCGCGGAGTTATGTCGTTTTGGAACGTCATATCTCCGCGCGGAGTTATGTCGTTTTGGAACGTCATATC  
TCCGCGCGGAGCTATTANCCGAGATATTA  
AAAAA  
AAATCATCGAAAAAGNTTCGATTTTCGCACCGACCT  
CTATTTTGAAAAANAAGCGTGATGTAACCCCTTGCCATTTTGTCGATTTGGGTCAAAATTTTGGATTTTCCTTT  
TTTTGATGCCAATCGATAGAACTGATCCTTACGAGTCAAAAATGGTATGAAATTCCAAAATCGGACATTAT  
TTGACGGAAATATTCCAAAAA  
AACATCAAAAAGGTTGAATTTACGAACGAATCGGTTTTTTGTCAACAAC  
ATTTTGAACCCATCGATGATTAATTTGTTTGAACGCCAATTGATGGTAGGGATCCGTACGCATTCAAAAA  
GGTATAACATTTTAAAATCAGACATTATTTACCCGAGATATTA  
AAAAA  
AAATCATCGAAAAAGTTTCGAT  
TTTCGCACCGACCTCGATTTTGAAAAAAATCGTGATGGTTTGAAGGTCATATCTCCGCGCGGAGTTCTGT  
CGTTTTGGAACGTCATATCTCCGCGCGGAGNTATGTCGTTTTGGAACGTCATATCTCCGCGCGGAGTTATG  
TCGTTTTGGAACGTCATATCTCCGCGCGGAGNTATGTCGTTTTGGAACGTCATATCTCCGCGCGGAGNTAT  
GTCGTTTTGGAACGTCATATCTCCGCGCGGAGNTATGTCGTTTTGGAACGTCATATCTCCGCGCGGAGTTA  
TGTCGTTTTGGAACGTCATATCTCCGCGCGGAGCTATGTCGTTTTGGAACGTCATATCTCCGCGCGGAGCT  
ATTACCCGAGATATTA  
AAAAA  
AAATCATCGAAAAAGTTTCGATTTTCGCACCGACCTCGATTTTGAAAA  
AANC GTGACGATTTGGAACGTCATATCTCCGCGCGGAGTTATGTCGTTTTGGAACGTCATATCTCCGCGCG  
GAGCTATTACCCGAGATATTA  
AAAAA  
AAATCATCGAAAAAGTTTCGATTTTCGCACCGACCTCTATTTTGAA  
AAAAACGTGATGTAACCCCTTGCCATTTTGTCGATTTGGGTCAAAATTTTGGATTTTCCTTTTTTTGATGCCA  
ATCGATAGAACTGATCCTTACGAGTCGAAAATGGTATAAAATTCCAAAATCGGACATTATTTGACGGAAA  
TATTCCAAAAAATCATCAAAAAGGTTGAATTTACGAACGAATCGGTTTTTTGTCAACAACATTTTCAACC  
CATCGATGANTAATTTGTTTGAACGCCAATTGATGGTAGGGATCCGTACGCATTCAAAAAGGTATAACAT  
TTTAAAATCAGACATTATTTACCCGAGATATTA  
AAAAA  
AAATCATCGAAAAAGTTTCGATTTTCGCACCGA  
CCTCGATTTTGAAAAAAATCGTGATGATTTGGAAGGTCATATCTCCGCGGGGAGTTATGTCGTTTTGGAAC  
GTCATATCTCCGCGCGGAGCTATGTCGTTTTGGAACGTCATATCTCCGCGCGGAGTTATGTCGTTTTGGA  
CGTCATATCTCCGCGCGGAGCTATGTCGTTTTGGAACGTCATATCTCCGCGCGGAGCTATGTCGTTTTGGA  
ACGTCATATCTCCGCGCGGAGNTATGTCGTTTTGGAACGTCATATCTCCGCGCGGAGCTATGTCGTTTTGG  
AACGTCATATCTCCGCGCGGAGTTATGTCGTTTTGGAACGTCATATCTCCGCGCGGAGCTATGTCGTTTTG

GAACGTCATATCTCCGCGCGGAGTTATGTCGTTTTGGAACGTCATATCTCCGCGCGGAGTTATGTCGTTTT  
GGAACGTCATATCTCCGCGCGGAGCTATGTCGTTTTGGAACGTCATATCTCCGCGCGGATATTACCCGAGAT  
ATTAAAAAAAACATCGAAAAAGTTTCGATTTTCGCACCGACCTCTATTTTGAAAAAAAGCGTGATGTAA  
CCCCTTGCCATTTTGTTCGATTTTGGTCAAAAATTTTGGATTTTCTTTTTTTGATGCCAATCGNTAGAACTGAT  
CCTTACGAGTCAAAAATGGCATAAAAATTCCAANATCGGACATTATTTGACGGAAATATTGCAAAAAATCA  
CGAAAAAGGTTGAATTTACGAACGAATCGGTTTTTTGNCAACAACGTTNTTCAACCCATCGATGATTAATT  
TGTTTGAATGCCAATCGATGGTAGGGATCCGTACGCATTCAAAAAGGTATAACATTTTAAAATCGGACAT  
TATTTACCCGAGATATTAAAAAAAATCATCGAAAAAGTTTCGATTTTCGCACCGACCTCGATTTTGAAAA  
AAATCGTGATGTTTGAAGGTCATATCTCCGCGGGGTTCTGTCGTTTTGGAACGTCATATCTCCGCGCGGA  
GNTATGTCGTTTTGGAACGTCATATCTCCGCGCGGAGTTATGTCGTTTTGGAACGTCATATCTCCGCGCGG  
AGCTATGTCGTTTTGGAACGTCATATCTCCGCGCGGAGCTATGTCGTTTTGGAACGTCATATCTCCGCGCG  
GAGTTATGTCGTTTTGGAACGTCATATCTCCGCGCGGAGTTATGTCGTTTTGGAACGTCATATCTCCGCGC  
GGAGTTATGTCGTTTTGGAACGTCATATCTCCGCGCGGAGTTATGTCGTTTTGGAACGTCATATCTCCGCG  
AAAAAGTTTCGATTTTCGCACCGACCTCTATTTTGAAAAAAAGCGTGATGTAACCCCTTGCCATTTTGTCTG  
ATTTNGGTCAAAAATTTTGGATTTTCTTTTTTTGATGCCAATCGTTAGAACTGATCCTTACGAGTCAAAAATG  
GCATAAAATTCCAANATCGGACATTATTTGACGGAAATATTGCAAAAAATCATGAAAAAGGTTGAATTTA  
CGAACGAATCGGTTTTTTGTCAACAACATTTTCAACCCATCGATGATTAATTTGTTTGAATGCCAATTGAT  
GGTAGGGATCCGTACGCATTCAAAAAGGTATAACATTTTAAAATCAGACATTATTTACCCGAGATATTAA  
AAAAAAATCATCGAAAAANGTTTCGATTTTCGCACCGACCTCGATTTTGAAAAAAATCGTGATGAAGGTCA  
TATCTCCGCGGGGAGTTNTGTCGTTTTGGAACGTCATATCTCCGCGCGGAGTTATGTCGTTTTGGAACGTC  
ATATCTCCGCGCGGAGTTATGTCGTTTTGGAACGTCATATCTCCGCGCGGAGTTATGTCGTTTTGGAACGTC  
CATATCTCCGCGCGGAGCTATGTCGTTTTGGAACGTCATATCTCCGCGCGGAGTTATGTCGTTTTGGAACG  
TCATATCTCCGCGCGGAGTTATGTCGTTTTGGAACGTCATATCTCCGCGCGGAGTTATGTCGTTTTGGAAC  
GTCATATCTCCGCGCGGAGTTATGTCGTTTTGGAACGTCATATCTCCGCGCGGAGCTATGTCGTTTTGGAAC  
CGTCATATCTCCGCGCGGAGCTATGTCGTTTTGGAACGTCATATCTCCGCGGAAAAGTTTCGATTTTCGCA  
CCGACCTCTATTTTGAAAAAAAGCGTGATGTAACCCCTTGCCATTTTGTCTGATTTNGGTCAAAAATTTTGA  
TTTCTTTTTTTGATGCCAATCGATAGAACTGATNCTTACGAGTCAAAAATGGTATGAAATTCCAAAATCG  
GACATTANTTGACGGAAATATTCCAAGAAAAAACATCAAAAAGGTTGAATTTACGAACGAATCGGTTTTT  
TGTCACAACATTTTCAACCCATCGATGATTAATTTGTTTGAACGCCAATTGATGGTAGGGATCCGTACG  
CATTCAAAAAGGTATAACATTTTAAAATCAGACATTATTTACCCGAGATANTAAAAAAATCATCGAAAA  
GTTTCGATTTTCGCACCGACCTCGNTTTTGAAAAAAATCGTGATGAAGGTCGTATCTCCGCGGGGTTCTGT  
CGTTTTGGAACGTCATATCTCCGCGCGGAGTTATGTCGTTTTGGAACGTCATATCTCCGCGCGGAGTTATG  
TCGTTTTGGAACGTCATATCTCCGCGCGGAGNTATGTCGTTTTGGAACGTCATATCTCCGCGCGGAGNTAT  
GTCGTTTTGGAACGTCATATCTCCGCGCGGAGNTATGTCGTTTTGGAAGAGATTCGATTTTCGCACCGACC  
TCTATTTTGAAAACAAGCGTGATGTAACCCCTTGCCATTTTGTCTGATTTGGGTCNAAATTTTGGATTTCTT  
TTTTTTATGCCAATCGATAGAACTGATCCTTACGAGTCAAAAATGGTATGAAATTCCAAAATCGGACATTA  
TTTGACGGAAATATTCCAAAAAANCATCAAAAAGGTTGACTTTACGAACGAATCCGTTTTTTGTCTACAAC  
ATTTTNAACCCATCGATGATTAATTTGTTTGAACGCCAATTGATGGTAGGGATCCGTACGCATTCAAAA  
GGTATAACATTTTAAAATCAGACATTATTTACCCGAGATATTANAAAAAAATCATCGAAAAAGTTTCGAT  
TTTCGCACCGACCTCGATTTTGAAAAAAATCGTGATGAAGGCCATGTCTCCGCGGGGAGTTCTGTCGTTTT  
GGAACGTCATATCTCC

>Ref\_TART

CAATTTAAAAAAAACACAACCTTAAAAATCAGAATTTTTCAATTCTAATAATTAACCAAGCTTGCAAATAT  
ATTTGTGAAGTTATCTGAGTAATTGCTAAACAGGCATAGTGGCAAGCAAATACAATAAATATTTAAAAGG  
TGCAATAGTGGTAAAGACAAACATAACTGCACCAGAAATAATATATAAAGTGCATAAATGCAAAAACCA  
ACTGTGTCTAAAAGCCCGCCTAAAAGTCCGCATAACGCTTCTGAAATTACCGCAAACCTCGGCTGTCCCCC  
CCACCGCGCAACCGAAGAATGCAGCATAAGTGAAAGAGCGAAAAGTGAACTTTCACAGTTGCAGCAACA  
GCTCACAAAAAATCCGCAAAAGCAGCTCAGCCGAGAACACCGGCGACAGCAGTTGCTAAGGCTATGCGA  
AGAGGAGGAAAGGTTAATGCCCGATGTCCCAGCGCAGCAGCCGACGCTTACGCTCAAGCATAAGCCGAA  
GCTGAAAACAGTTCTCGCCAACTCTTCACCGCCCAGCTCGGCACCGCTGAGAATGTCTCTGACGAAGTCGT  
CGAAAGCTAAGGCAAGGAAAGAGAGCCAATCATCTGCCTGCAGAGAGAAAAGTCCAGAAGAGAACACCT  
ATGTCAATGTGTTGGAGTCTGACGATGAAAGCGACATAGCAGCCAATAAAAATTATGACCAGCCGCAACA  
GCAGACAACCTATTGCACAGGTACATAATTTCAATACAAATACTAGCATAACTAGCACTCCCAAAGCAGCC  
TCTCACTGTGATCCATCGCCAACGTATCGGCACACGAAGTTGAACCTTCATAATGTTGATAACACAAGAG

AAGCTAGCTATGTTAATAACATTGATGAACTAACAGACGTCTTTGACGACGAAGATGATGATGATGACTG  
TTACCGGCCCCGCTGCTGTTATTAACAGCTCAGTTGCTGACATGCTTAACAGAACAACACTACTGTTGAGCATA  
ACAGCACAGCCACTGCTAACAGAGGGGAAATTCTTGCAAATGTTAAAACATCTGATGCATTTGCTGCCAA  
TAAAATTAATAGTATTACTTTTGA AAAAATCGAACCAATTCCACAAACAATAACGCCAACAGTAGCAAAA  
GGACCTAAATTTAACTGCTCTATGCTACCTACA ACTTCCCTGTCTGCCAAGAAAAGTTTAAAACGTAAAGG  
TACACTGCCGCAACAAAGTAAACAAAAGCGAGCACAGACACTGGCAGTACAAGGAAACTCACGACCAGG  
CATGAAGATACAGGACTTCTTGAAGTCATCAACAAGAGTAACTAAGGCAACAAATAAAGCAGCTATAATC  
AACAAATATAAAAAAAGCAATCGTAATACTAAAAAAGTAAACCCCTCTAGCAGCACTAAACTCAACAAC  
AGCAGTATGGATATTGACCTGGATAGCAGCGACATATCAGCAAATAACATAGGCTCTGATGATGACATTG  
TTCAGATCCAGAGCAATGCACAAGAGGTTACAAACCACGCCACCAAAGTCCAGCAACAACAACAGCATC  
GACAGCAGCAACAACATCACCAGCAGCAGCAACAACAGCAACAGCAGCAGCCAACTAAAAGCACAAAA  
ATTCCAACAATTTTTCTACCCAGCATAAGTGACATACAACAAATAATTGATATGCTCAATAATACAGTGGG  
TGCAAATAAATATACAACAAAAGTGCACACAAAACGATGGAGTCAGAGTGCAATGCAGCGACTTACTATC  
GTATAATGCAGCTATAGCACTGCTCGGCGCCAATACGGAAATACAGATGCACACCCACCAGATGCGAAGC  
GAGCGAGGATACCGTGTTTTACTTAAAAATGTCCACCCTCCACGCCATGCGAGCAAATCCGAGCAGAAT  
TGGCGAAACATGGACACACGGTTCGCTTTGCCAGCGTCATTAAACATCGATTTGAGCGACGGCCACTTAA  
CATGTTTGAAGTCGAACTGGCACCAACGGCGACACCAACGACAAAGTACTGGAAGTAAAACTCTGGG  
AAACCAACACATTGAAGTAGAAAGACAGCTGAAGCGAGATGAGCCTGTACAGTGTTCATCGGTGCCAATC  
GTTTGGGCATAGCAAGAACTACTGTTCGTAGGCCTTTTGCATGTCTCAAATGCGGTGAACAGCACCCGACT  
ACAACGTGTACTAAACCCAGAAACACACCTGCTAAGTGCGTCAACTGCAAGGCTGACCACATAGCCAGCT  
TTAAGGGATGCAGTGTGTACAAAATGGAGCGGGAAAACTAGCAGCAAACCGTGTCCGGGCGGCAATTG  
ATAGGCAACAGCAGCACCAACAACAGCAGCAACAGCAACAACAACAGCAGCAGCAGCAGCAGCAACAG  
CAGCATCAGCAACAGCAACAGCAACAACAACAGCAACAACAGCAGCAGCAACAACAACAACAAAATCG  
GCAGCTACAACAACATCAGCAGCAGCAGCAACAACAACATCGGCAGCTACAACAACATCATCAGCAGCA  
GCAGCAACTACAACACCAACACCAGCAGCCACAATACCTAGCAATTAATACTTCAGCTCCTAGTGGAATT  
AAGTCGACTAAGGAACGGAAGCAACAGCAACAGCAACTTCGGCAACAACAGCAAAAAGCAGCAGCAGCA  
ACAACAGCAGCAACATCAACAATTGAAGCCAAACAATCAACTGACTTATAGCCAAGTAGCCAGTGGACA  
AGCAAATACGAGCCTCAGTCACAACCCAGCCATGCAACACCTCAAGAAGTACCAGCAACAGCTACAAC  
GGAGCAGCAACAGCAGCAACGACAACAGCAGCAACAACAACAGCAGCAGCTACAGCCCGAGCAGCAGC  
AGCAACTTCAGAGGCAACAGCGACTGAGGCAACAACAACACTACCTGAGCAGCAAAAACGGCAGCAATATC  
AACGACAGCAAGAGCAGCAATCACATGAGCAACAGCAACGACACCAGCAGCAATCGCAACAACAACAAC  
ATAGACAACAGGCGGACTCACCACTCTTGGAGGCGCTGCAGCAAAAATGTGATAAGTATAAATGAGATGTC  
CAAGAAAATAGACATGCTAATTAGCCTGTTGCTCACAATGGCAGCAAGCAACACTAATATTAATAAACAA  
GGAGAACAACAACAATCCCCTAACAACATCAACCTCTGATACCTTGAACAATGTCAATAAAAAAAAC  
AATTTTCCTAATTTAATGAGTACATTGATTAGCACAGCACAGCCAATAAACAAACAGCCAATCGGCAAACG  
CCAATTGTGAACACATAGCCACTGACAGTAGCCAGTATGTATAGAGCGAACAACACCAACAATGCCAGCG  
CGACTGCCACATTGAGTCAAGTCAATGATGGCAGACACACCCTCACACTACTAGTGACACCACAACCTAC  
TACAACAACACATTTGTCCAACCTTAACAGTCCATTGCTTAACAGGAGAAGGCCAAACATTATTCCAAT  
GACGAACCACAGCAGCGACCAATATGGCAACTCTTTTAAAATTGCATATTGGAACGCTGCTGGCGTTAGA  
AACAACTAAATGAATTAGAGGTTTTTCATGAATCGACATAAAATTGATATTATGATGCTCGTCGAGCTAC  
GATTGGGCCCCAGCGCTCTCAATCCAGGTCCCCCAATTACTATTAACGGCTACCATACATATGCGGCAACT  
CGCCACCACCACACCATAGATGCGGGGGTGTGTTGCCACTTTAGTAAAACACGGAATCAAACACATTGCCC  
TGGAAGCAATTGTGTTTGAATCCATGCAATCTGCACCAGTAGCTGTGACCCTGGCAAAAAATGAGACCAT  
TGTCCTAGCTCCAATTTATTGCCACCGCAATATAATTGGAGCGCTGACATGTTTGCCAACTTTTCCAAC  
ATTTTGAAAAATTGAGCGGGTCCGGGTTCATTTTATGTGGCGACTGGAACGCCAAACATTCTGTGGTGGG  
CAACCAACGTGCTTGTGACGAGGGGTAGAGCTGCTAAGAAGCATTACAGCAACAAGAAGCTGAACAT  
TCTTGCTACAGGTGGGGCTACACACTTCCCATAACAAGTAGGAACAGGCCATCCGCTATCGATATTGCG  
GTCTACAGGGCATTAAACAATGACCGGACTACAAACACACTCTACAATCGATCTAGAATCGGATCATCTAC  
CTATACATATAGGCCTCAGAGTAGGCCGATTCCCGTATAAACAAACAACAATGCGATTGCTACCGATAAA  
TGCAAACGTAAAAAAATTTCAAAACCATTTAGATAAAAACGTTTCGTCTTAATACAGAAATAATATCGGGA  
CCCGATATTGAAGACGCCATCGACATATTAAATAAAAAACATATATAATGCTTCCTTAGCAGCAACACACC  
CACCTCGTAGACATCAACAGCAACAAGACAAAGGCACAAATACAAATCGCATGAACCATGGCCGTTTTAA  
ATTAACAACGAAACAATTAGACTTTTGGCAATAAAACGGCAGCGCAAGAGAGAACATATGGTTATGCG  
AACACCTCTCACGCGAAGCCGACTTAGCCAGGCCCAAAACAAACTAAAAAAGCGCTTCGTATGGACAA

GAAGAAACAAACGAACAAAATGTTTGAACAAATAGATGCCACTGATCGCTACAAGATACAAAAGCTTTG  
GCGCATCACAAACAACATCAAAAGGCAACCAGAGCCAAATTGGCCACTTAAAATACAAGCGACTGACAA  
CAACAACAGTCGCAGCAATAGAACACAATGGACTAAACTAGTAAAGAAAAGGCTGAGGTCTTCGCTGC  
ATACCTGGAGCAACGTTTCAGCCCCATATTCTCAAATACGGCTGAATACAGACTCCAGGTGAATAATGAG  
ATAAACACTAGACAGCAAACCTAACGATTGCGACAGCGGCGCTGGCGTCGCTGGTGTATCCCTTTTCGCC  
CAATTACATATACTGAGGTGACAAAAGAGATTGGCTGCTTGACAATAAAAAAGGCTGCAGGCATCGATAA  
CATAGACAATAGAGTCATTAAAGCACTACCAAAGAAAGCAATACTGTACCTTGTCATGATATACAACCTGC  
ATACTCAGACATGGCCATTTCCCGCGACAGTGGAATGCGCTGCCATAAAAAACAATTTTAAAGCCTGGAA  
AACCCACAGAAGATGTGCGCTCATATCGACCAATAAGCCTGCTTGACAGGTTTCTCCAAAATCTTTGAAAG  
GCTTCTCATGTACAGGCTCTATGAATGCTCTGAATTTGCAAAGGCCGTGCCACTACATCAATTTGGCTTTC  
GCAAAGATCATGGCACTGAGCAGCAACTAGCACGGGTAACCCAATTCATCCTGAGTGCATTTGAAAAGAA  
ACAATACTGCTCAGCCGTCTATATCGATATACGCGAAGCATTGTGATCGAGTATGGCACGAAGGATTGCTCT  
TGAACCTGGCAAGATACTGCCTAATAGGCTGTATAATGGTTCTCAAGAGCTATCTACTTGATCGCACATTC  
ATCGTACATGGAAACGAGGGCATTAAATCTAGAATAGGCCAAAGTTAGCGCTGGAGTGCCCCAGGGGAGC  
GTACTTGGGGCCAATTCTATATATCATCTACACATCAGATATGCCATTACCACACATTGCAACACCTCCCAA  
TCCAACAACAACAGCAGCAACAATAACAAATACAGAAACGTCCATAACTAACCCATACAACCTGCAGCAT  
GCTACTGTCAACGTTTGCCGATGACACAGTCATAATGAGCTCTGCTGACATACTGCAAACATCATAACAGTG  
CAAATCAAACGTATCTGCGCCAATTCACCATTTGGTGCAATCGCTGGTGCATCCAAATTAATGACAGCAA  
ATCAGCTCATGTAGTACATACTCTACGCAATTTAAACAGCCGAATGAATTACCTGACTCCACGACTCAATG  
GGCAAGAAATCCCCTCTAAACCAAGGCAAAAGTACCTAGGTGTCCATCTGGACCGAAAGCTCCACATGCA  
ACACCATGTTACGCAGCTACGATGCCGTCTTAAAGCACTCTATAATAAACTAGAGTGGCTAATAGGAAAC  
AAAAGCGTACTCTCTGTAGAATGCAAAATCACTATCTACAAGCAGATGATTGCGCCGATATGGAGATATG  
CTTTGCCGATCTGGGGTGCCATGATCTCTGACACACAGCTACGCCGAATAGAATCCACACAGAAGCTGGAT  
TCTAAGGAAGATAGTGAAGGCCTCCTGGTGGACTAGAAACAAAGACATACGTGATACTTACGACATAGGC  
ACAGTGGACGAAATATTCCATACTACAAGCAAAAGATTGCGCCGACTCACTTGCTATTCATCCTAATGCCA  
ACGCTCGTAAGCTAATCGCAAGTCCGTATGTTCCAATTCGTCTTGATCGGCAAAAGGTATAGTCTGCAACTA  
CAACAACATGTTTCGCCCTCTACAGCAACTAGTGCAGCAATCGCAAGAACAACAACAGCTGCCAACTCTGC  
TTCGCATGGAGCTTGAAGAAGAAGAAGCAAACCTCGCTCAGAATGCAACAGCAGCAGCAACAGCAGACCC  
CACAACAACAGCCAGCCAGATTTCAGCGAAATGAGGATAAATTCGCTAAGAAGGCACTACAGAGAGGGAC  
GAATTACGCTCGAAGAGCTAAAACCTAGCAATTAGGGAACAGCCATTGGTGATTTCAGCAATTAGTACTGCC  
TCGCGAGCTGGCTATTCAAATATACCAGCAGCAACAACAGCAGCAGCAACAGCAACAACAGCAGCAGCA  
ACAGCAACAACAGCAGCAGCAACAGCAACAACAGCAGCAGCAACAGCAGCAGCAACAGCAACAAGAGC  
AGCAGCAACAACAGCAGCAGCAGCAACACCAGTACCAACAGCAGCATCAGCAACAGCAACAACAGCAA  
ATACAGCAGCAGCAACAACAGCTCGAGGGACTCCAGCATCAGCCAAATCAGTCGCCTGACGTCGAAATA  
GTGCTAGATACACCACAGCAGCAACAAGAGCAACAACCTAGAACGGCCACTTCCACAACCTCAGCAAGCC  
AATTTACAACAGCAACGGCTAACTGAGGACGAGCAGCAGCTTGAGCACCGACTTGAAAGACTCAGGCAG  
CAACTTGAGCGCGAGATGGACGAGGCTGCAAATAACGAGCCAACTCAACAACAGCGAACACCAGAGCAG  
CAGCAATCAAACCAACAGCAACACACAATAGCCTTAACTGAAAATAAAAAATACAAATATTAATCCAAGC  
AACTCAGTCTGTGCCAATATAACAAATTTTTCTATTTACAGAGCATAATAATAGCCCCATACAGCCTCAT  
AAACATTGCCACAGATGCTCCTTGGCAACAAAATCAGCCCCACAACCACACAACAGCTCCGCCAGCAGCAC  
TCGAACCTTCACCAGCAGCACCTACAGCAACAACGGGAGGTAGTGGAGGCGCCCAGCAGCAACAACGCA  
CAGTCAACAGTCAGGGGGGGCTAAAAGAAGAAGAAGCAGTTCAACAAGCTGTATTGAACCCAAAAGACGC  
TCACCTGCAGCTCCTGACAACCAGCAACAGCGGCAACTCCACACTCTACTCGGCAAAAGGCACTCGCAAC  
AACGTCAAGCATGCCTTCGCAGAACACGGCTGGGTACATGGCAGCTGCAAATGCCCCACAGGCTGGGAAT  
ATGGCTCCTACTCTCCTGCTTTGGCATGCAAACACACCATAAGGTGCCCCAGAAGCTTGTGTGGGCACCTC  
CAGCAGACTACGGTCAATCCTCGACGAACGGCAGACACCTCCAAATTGCCAGAAGGCGCCCGTGGCACTC  
CTGGCAGCGGCTCCAACGTGATGGTCCAATTGCGGGCGGCAACACACAGGAAGGCCAGGCCGTATAA  
CATATTAATCCATGAGACCTGAAATAGATAAATAAAGTAAATTTGCACCAACTAGAATTATAAATTCC  
AACAAATCCTTAAATTCGCCCCCTCTGGCAAACTATGTTTACAATTTAACTCAATCAATATGTTAACTCAGC  
TGTTCATAACGCAATCGAAAGCAGCCCTGATAACATTAACAGAGGTATGTAATAACAGAACCATTGCAGT  
AATTGCTCAACTGTTCTGAACGCAATCGCCAACAACCCTGATAACGTTAGACAGAGGCACTGTTAATAAC  
AGAAATAGTACCGCCAACGTGCTAAAAATTCAAATAAGCCTGCTCAAGCATAGTATTAAGTAATGTTAAA  
TGTAATAAATAAATACTGTTAAATGTTTATTTATCGTAATTCGTCACAATTTTCTTTTATGTTGTGATATGCATG  
TAAATTTTGTAAATATGTCATACATGCCAGTAATTTGTCAGCTAGTCCGTTTCACAATTAGACCTATT

CGTTCCAATTCTGTCTCATATATTGCATTGGAAGTCTAGCAATTAAGCAATGAAAAAGACAATAAAATGCGAC  
TACTAGCTTAATCGCTAGAAGTTCGCCGTAGCGCACGCATGCGCAGCAATTTAAAAATTA  
>160\_rnd-6\_family-3320\_\_DNA\_\_TcMar-TcI  
CCACTTAAGTTTCTTGGAGCAGACTGATTTTGCCACAAAATTTATGGTGCGTGAGATAGAAGGAGGTGA  
TCTTTCATCCAAAGTGTCATGTAAGACATGTTTGATAAGCAAAACACACGTGATGTACGTGCATTTTCTAA  
TTCATCGGGAAATAGAGCCAGTAAACTTTTCGCGCTAGTTCATTTCGGATGTGCGTAGACTTTTTTGAGACCA  
GATCAATAGCGGTAATTGATATTACCTTCATATATTTTCATTAATAAGATGATGTGTTATTTTTTGCAT  
TTAAGCATTTGATGGAGAGTGGTAGACGAGTAACGTGTATTTCGTAGCGACAATGAGCGTGAATACGTGAA  
CAACACGTTTGAGGAGTATCTCAATAATAAGGATATAGCACGACAACACTGACAATACCGTATTCGCCGCAG  
CAGAAAGAAGTGTTGAAAGGGCGAACCGAACATTGGTTGTAATGTCACGATGCCTGCTTGTACATTCTG  
CTTTGAAGGAGTCTTTTATAGGCGAAGGCACTATTCAGAGCGGTTAGAAATATGACGCCAATAGAAGTAT  
GGAATGTTAAAGAACCCTCCATTTGTCATTTAATGTTGGGATAATAACAAAACACTATCGGATATGCGAGC  
AATTAAGTATATCGTTTGTATAATTCAAACCTCTGGACAAGTGATCGAGCAGAGGGATGCTCTGTTTCG  
ATAAGCAATACAGCAGTGAACGTACGATACTGGAGCCATTACATTTGATCTTACAACGACGAATATCAA  
CGTCGGAATAAAAAATGACAGCAGCAGCGACAATTTAATGAGTGCCTCAAGGTACCAGGTTTGGGACC  
AGGTAGACAAAAATTAGTTCGCTATGGAAAGCGAGGACGAACCAAGAAGCAGTACAGTATTCTTGGCGC  
TTTGAAAGTACCACGAATACCTACATGCTACGAGTCTATTAGCTGTTCCAAAGGTTCACTTGACAATGAA  
CATAGAATACGACCCTCTGATGTTGAATACAACACTATGCGCATTATCAATAAAGATCAGCACTTTGTAAAG  
TATCAGGTGTTGATCAAAATTGATCCTTGATTGCACCAGCATAAGAAAGATAGTCGCAATGAATAATAAA  
TGAATACGTGATTTGTTTTGTCGACAAAGCAATGAAAACACTGCACGCCCTTGGATGCTGGATACCAAAATGT  
TTTCATAAATAAGGAGTGTAGCAAAGTGAATGCGTCGCAATACCAATAATTTATGGAGAAACTAATGTGG  
CTGACGACGATTAGGCCCGGACATTTTGCCTCAGTAACAAAATTAACGCAGTGCAATAGGGAACACATA  
GCTAACACCTTGCAGGCGTTAAACATGCTCTAAGGTATCTGGCATCAATAACACTTGAAGCTGCACTACA  
AAGAAAAAATAAATCTTGTATATTGCATGGCTTTCGAGTAGTAGCGTAGCGCGACATACATTTGTATAATT  
AGTCGCCCATACATTTGAAAGTGACGCAAAATCTCTTGGCTGGCTTCTCATCTGGCTTTCCCCACTTAACC  
AGACATGCCAGCCGACTGACTTGTCCGCTCTCCAAAAGCCAGACGAACGACTTATACAAAATGCATTCAT  
ATGTAAATACAATTTGGGGAAGGTTCGTGGTCAGCGCTAAAAAACTAATAAAATGTATTATTTTGTGCGTA  
ACAGTCCAAGCAGTAGTGCATAACAATACACTCAATTATGCTGTTATGTATAAACACGCATACAAACATA  
ATTGCCTGCAAGGGTCTTACATTCTATTTTGGCTTTTTCGGTCTTTCGGTCGGGAAAGCGCAATGATACTG  
AATTCGTATTCGTTCCCAATTTAAAAAAAATCTAGCTGCAAAGTTGTATTTTGTGTTGTATGGCGATACCTAT  
CTTAGTGTTTATATTGTCTGTGGTTTATGGAATTCCCAAGTAGAGTTCTTCTACAAGAGCCTCTTCTCTGT  
GTTTTTATACCCTTGCAGAGGGTATTATAATTTTGTGCGGAAATGTGTAAACGCATAGAAGGAGACATCTCC  
GACCCCATAAAGTATATATATATTCTCTATCAGCATCAACAGCTGAGTCGATAAAGCCATGTTCTCTGTC  
CGTCTGTCTGTTTCTATGGGAACTAGTCTCTCAGTTTTTAAGCTATTTAAAAAATAAAACTTTGCAGAAAGTCC  
CTCTTTCTGTTGCACTCAGCACATATGTCAAACCCAAAATTACACATGTATAAGAACTTTAAAGTATGTAT  
GTATGCGTTGTTATTCACAGCTCTGGCTTTAGCTGACAAGAAATTAATTTTGTAGTTTGTAGTGCAGATT  
ATGAGCTATCCCAAATTTGTGTTGATAGATGAGTGCATTTTGTGTACTGAGGTTGGCTCCGTAGAAAATAT  
GTATTTCTAAGTCGATGCAAATATTTACATAATTTCTTTAAATTAATTAATATTATTTTATTCTCCAATT  
AAGAAATAAAAGAGTGCTAAAAAATAACAATTACATATTTATTTGTATAAATAAATATCACTTTTGATTCAA  
TATTTAGTTAGATATTTCAATTTAGATTAGTGCGCTTGGGATTGGGGGTAGGTCGTGTTCTGCGCTAAATA  
AGTAAGAAAATTGTTTCTCCGCCAGCCAGAGACTTTGCCAGAGCTATCCACTGCAACACATTCAAATATG  
CTGTGTTGTATGTATATTCAAACACATACATACATAAATTGCTTGCCTTCCCTCATTATTTCTTTAATTTATT  
TTATATACTTAAAAATAATAAATTTAATTAATAATATCAAATATAAAAAATTACATAAATATTTGCAT  
CGACTTAAAAATACATATTTTGTATAGAGCCAACTCAGTACACAAAATGCATGTATATATCAACATAAA  
TTTTGGGTAGGTCGTGATTTGCGCTAAAAAAAACCTAAGAAAGTTGTTTTTTTGCCAGCCAGAGACTTTGCC  
AGAGCAGTGGATAACAACACATTCAAATATGCTGTTATGTATGTATATTACACGCATACAAACATAATG  
GCTTGCACAGTCGTCACAGAGCCGAAGCTGAGAGCAAGTTCTCAAGCAAATTTCAAAAAGTCAAGCTGCA  
TAGTAGCATTTTGTGTTGTATGGCGTTACTCATCTTAGTGTTTGTATTGTCTTTGGTTTCACTATGCTCCTCATA  
TTTATGCAAAATCCTATTAAGATCGGACCACTATATCATATAGCTACCATAGGAACGATCGGTTGAAAAC  
AAGTTGTTGTATGAACAAACAATTTGTTTTTCAAGATATCTTGACCAAATTCGGCATTTATTAGTTTTTTTA  
TGCTCCTCATATATAGGCAAAATACTATTAAGATCGGCCACCAATATCATATAGCTGCCATAGGAACGAT  
CGGTCGAAAATTAAGTTGTATAAAAAAACATTTTGGTTCTCAAGATATCTTTTCTAAACTCGGCATTTATT  
AGTTTTACTATACTCCTCATATATAGGCAAATTAGTGCGCCAAGTCACGTTTATACAGACAGACGGACGT  
TTTCAACCTTTTGACCATTTTCCCTCGTGCCGTTGTTTACGCGGACTGGCTGCACAGAAGGCATAGTAGAAA

AAGGCCAATATTAGATAGTTTTTTATTAAAGGGGGTTGGTCCATTGGGACAGTCTTCTTTTCTAAACTCGGC  
ATATATTAGTTTTACTATACTCCTCATATATAGGCAAATTAGAGGCGCCAAGTCACATTCATACATACGGA  
CAGACAGACGGACGTTTTCAATCTTTTAACCATTTACCCTCGTGCCGTTGTTTCAGCGGACTGGCTGCACAG  
AAGGCATAGTATAACAAGGCCAATATTATATAGTTTTTTATTAAAGGGGGTTGGTCCATTGGGACAGTCTTA  
AGTAAGATTAATATATTTTATAAATTTTGTATATAGATAATGAAACTCGCAAGCTTTCTGTATCAGCAGTCT  
GGTGAGTAAGTTCTCTGTACATCCATTTTGTGTCCGATTATCATTCTCAAGCTGCTTTCTTCTTATTCTTTT  
CAAATTTCTTCGTCACATAATGTGAATGTTTCTTTTTCATGCTGGCCCTAACTGCAAGGCTCAAATTCAAGA  
ACCGGGCGGTCGTGCGATAGCGAAATGGCGGGGGCGTTGCCGTGTTCTCCAAAATGTTGGGGCTGATTCT  
GCGATACCCTAAATACAGTGAAAATGGGGAAAAGTTGGTTTTGAATCATAGTTTTGTGTAAATATATGT  
ACAGTAAGAAGGAAGCACCTCCGATACCATAAAGTATATACATTCTTGGCCAACATTAATAATCAAGTCG  
ATCTCGTTTCAGTATGTTGAAGGTTGTTCAAGCCCTCTCAGTTTGTTCGATAGTCGGTAACATCCACAAT  
TCCAAGCAATTGATATAAATCTATATTAAATTCCTGTTCTTTATGAATACCTCTTAAGCTTCAAANGCTATG  
CCACAATACAAAGATATACCAAACAGCCTTTGTATCGGATAACGATAAATCGCAACGAGGGGAACCCCAA  
GGGTGCCTGCGACTATTTTAGTGTGCCCAGACAGAATAAGACTGCTGAGTGTGGCAGCCGCTGAGCGAGT  
TGCGGTTTTATACTGAACGTTTCGGCTCTCGAGGCGGGCGTTCCGGCTGCCACTCTCAGCAGTCTACTCTGT  
ATGGGCACACTAAAATAGTCACAGGTACCATTTAGGTTCCCTCGTTGCGATTTATGGTTATCCGATAACAA  
GGCTGTATGGTTAGTGGCTATGCTCAACAACCCCGTAAAATCAAACAAATAGAAGTTCCTATTGGAATCA  
CACAATGTAAAACTAAATTTTAAGTCTATTGCCGTTTTAAAAATAGACGATTAGTCAATGCACAATAGGAT  
CTAGTTCAGGAAGATCGAGTAAGAAACACAGCAGCTATAAACAAAACGTGTGGTTATATTGGTTAGCCGC  
TTGGAGGCCAACGCAAAAGTAGTTTCTGCATGCATGGTGTATTGTATTATAATATCCTTGCAGAGGGTATA  
ATAATTTTGTCTGTGAAATCTGTAACGCATAGAATGAGACATCTCCGACCCCATAAAGTATATATATTCTTT  
ATCAGCATCAACAGCCGAGTCAGGTCCCTCTGTCCGTCTGTCTGTTTCTATGGGACCTCGTCTCTCAGATTT  
TAAGCTATCTTAATGAAACGTTGCAGAAGTCCTTTTTTTTGTGTCACGCAGCACATATGTCAAACACAGCTG  
GATCGGACCACTATATCATATAGCTGCCATAGGAACGATCGGTGCAAAATTAAGGTTTTTTATGAAAAAG  
CATTTTGTTCATCAAGATATCTTGACCAAACCTCGGCATGTACAGCTGTGAAAACAAATAATAGCACCCTA  
CAACACATTTTGTTCCTTGATGAAAAAAAATGCGATTACTGTTCCGATTTTTTGTGAAANTTGATTTTATTTT  
ATACTGTTTGGNATTCCCCATAAACAAAAACAGTGTTAGCGTTCTTCAAATTTCTGTCTATATTTTCTTTTT  
GGGGGATTTTAAGAAAAAACCCCCCAAAATGCAGAAAAAAAAGTAGCACCATTAGCCNCCTCCTTAGCG  
AATCCTCGTTATATCGCGGAATTGCCTTTGCAGAATGAACGTGCTTATTAGTTTTGACTAAGATATCATTTT  
TTCTATCATAAAAGTTAATAATAATCATTACGATGGAACGTGGAATGCACTGCACTGCANAGAAGCGCGA  
TCTTATCAAAAAATTGATATTGGACGGAAAAACTTACAGAGATGTTGGTCAATTTGTAGGATNCTCCAAT  
AAAATAATTA AAAACGTCTTAAACTATCAAAAAAATATTGAAACACGCGGACGATAACGATCTATGACCC  
CTCTTCATGTCAAANGACTGATTCGTCAGAACACGAAGGATCCCTTCAAGCCTGCTACCGAGCTTAAAAA  
AAGAGCTTAACGTAAAAGTGACGGAACAAACAGTTCGCTAATATCTTAGGCAACATAACCTAAAAGACTG  
CAAACCAAGAAAGGTACCACTTTTAAACGCGACACCTATTACTAAGCGCATGAAGTTTGCCAGGGATCG  
TGCAAATTGGACATCCCAACAATGGAGGAATATTCTATGGTCAGATGAGTCCAAGGTGGCTATGATTGGT  
GGAAAGGGATCTCGATCATAACGTTAGACGTCCAAGGAACACAGAATACAAGCCCCAGTACACCACNAAA  
CCCATTAAGCATGGAGGGTGTAGTGTAATGGTATGGGCCTGCTTTTCTACTATGGAGTAGGTCCAATACA  
TTGGAGAAAACCATCATGGATCAGCACGTGTATGTGAATATCATGGAGACAGTTATGCTACCCTTTGTAG  
AATACGAAGTGCCCTCGTACGGGTNTTTCAACAGGACAATGACCCCAACACACCAGCAAGAAAGCAA  
AGCAATGGTTCAGGGCAAACCTTGAACGTTTGCTGCTGAGTCGCCTGACCTGAATCCCATCGAAAATCTG  
TGGTCCGACGTCAAGACGTCAAGGCAGTTGCTGCTTCCAAACCAACCACTATCGATCACTTTGGAAGAAA  
TTAAAGAGTCCTGGTCCAAAATTCCTTAAACGATGCCAGGACTCGGCTGATTCCATGCCAAGACGCTG  
TGCAGCTATTATTGCTAATAAAGGACACTGTACTAAATATTAAATAATAAATATAGATTAAAGTATTAATAG  
ATTAAAAAATGAATTCCTCACTTATTAGCCATTTTCTATATTTTAAGTCGATTTTTGAAAACCTGGTGCTATT  
ATTTTTTTTCGGNTAATTTAATCAATATCAATTTTACGCACATTTTCTTAAATAACTTAAGAACGTTAAGCAAT  
AGGATGATTTTCTTTTCATTCCCATNTTTGTAAGAGTCTTCCCTTTCTAAAAATGTGTTTCAAGTTCTAAAA  
ATGTGTCAAGTTTCTTACTGTTAAAAATGTGGGTGTGGCAACTATTCAAAAAATNNNTTGTGGTAGTGGTG  
CTATTATTTTTTTCTNAACTGTTATGCCAATTTTAAATCCTTACAGCCCAAAAACATATATGTGTATGCATG  
TGCCTCGCTCTCACTCATTGCTTCGCGCACTTCCATCCATCTCTTTCTCCCTGCATAGCTTCCCACAAAACC  
CCGAGATCTACAAACATTCATATGTAAGTTAACAATAAGCATAAATATATTGCCCTAGCAACTAAGTAG  
CTTCGTATTAACAATGCTGACGCGCCAGAACTGAGTTCAGCGCTCTGCGCTAAGAACGGCCAGCAGCGGT  
AAGCTGACACTGCATGGAATGCTGAGTCGGCTTGCCGACCATGCCTTGATGGCGTGATGCATTGAGGCTT  
AGGGTATTTGTATAATTTGCTTGTCCCCTAGTTTTAGTTTTATATGAGGCGCACAAACACATAAGTCGCTGA

AATAAATATACTGCTCCGGCATTGCCGATAAAACATATCTTTCGTTATTGTCTGAGCCCAAGGCCAGCAAT  
AGAAGCCAACTTTAAAACATAATCTTCAGTAATATTACTGGATCAAGGATAACTATATTTGGATCAAGGG  
CAGCGTACAGCTGTGAAAACAAATATAGCACCCTACTACACATTTTGTCTTGTATGAAAAAATGCGATT  
ACTGTTCCGATTTTTGTGAAATTTGATTTTTTTTTTATACTGTTTGGGATTTCCCATAAACAAAAACAGTGTT  
AGCGTTCTTCACATTTCTGTCTATATTTTTTTTGGGGGGATTTTAAGAAAAAACCCCCAAAAATGCTGAAA  
AAAAAGGTAGCACCATTTGCCCTTTTCTTAGCGAATCCTCTTTATATCGTGGAATTGCCTTTGCAGAATGA  
ACGCGCTTATTAGTTTTGACTAAAATATCATTTTTTCTATTATAAAAAGTTAATAATAATCTTAACGATGGA  
ACGTGGAATGCACTGCACTACAAAGAAGCGCGATCTTATCAAAAAATTTATATTGGACGGAAAAACTTAC  
AGATTTGTTAGTCAATTTGTAGGATCCTCCAATAAAATAATTAAAAACATCTTAACTATCAAAAAAATAT  
TGAAACACGCTGACGATAACGATTTATGACCCCTCTTCATGTCAAATGACTGATTTCGTCAGAACACGAAG  
GATTCCTTCAAGCCTGTTACCGAGCTTAAAAAAGAGCTTAACGTAAAAGTGACGGAACAAACAGTTCTCT  
AATATCTTAGGGAACATAACCTAAAAGACAGCAAACCAAGAAAGGTACCCTTTTAAAAGCGACACCTAT  
TACTAAGCGCATGAAGTATGCCAAGGATCGTGCAAATTGGACATCTCAACAATGGAGGAATATTGTATGG  
TCAGATGAGTGCAAGGTGGCTATAATTGGTGGAAAGATATCTCTATCATACGTTAGACAACCAAGGAACA  
CAGAATACAAGCCCCAGTACACCCTTAATCCATTAAGCATGGAGGGTGTATTGTAATGGTATGGGCCTG  
>9\_rnd-1\_family-388\_\_Unknown  
TTTATTAGAAGTTTCTGCTGCATATAACGAACCTCTGCTGGTTAAGTGGTTTTTCACATATTTTTTGGTTGGAGC  
GATGGAGGTGGAAAAGGAGACCACAAGGAGAGTGCTGAGCGCATCTGGGATCGACTTAGTGAATGAGTC  
TCTCTCAGTGAGTGAGTCTGTCTCACTGAGTGACCTCTCACGCTGAGTGAGGNTCAGTCAATGCTGTGTTT  
ACACTAGCACCGAACNGGCATGAACATTCTCCCCCTGGCAATATGCAGATTGCAAGAATTCCTATTGCGT  
GCATGTGCCAGAGAGTATCCATCCAAACTTAGAATTTTGAGCCATCGGCAGACCGCCTTGGCTCGGGAGG  
ATACCTGGTAGGATGATGTCTGGGTAGACGTCGGCGCCGAGTACCAAAGGGACTGGAGATGGACGGAAC  
CATTCGTTGTCCGCCNAAGCGACGTTGCTGAACGGGTCTTCATGTCCGCTCTGATGGCTCGGGCTGGAGT  
TATGCAGCTGAGTTGCGGGTCAGCCACGAAGACCACTTCTCGAGACATCTGAGTTGTCTTGGGCGTAGCA  
CGGCTGTGCACGCTCCTTCTGCGCCAATGCGTGTGACGGAAAGGCCATAGGCCCTTGCCACGGTTGCATTA  
ATGCGGCTTACTGAACAACATGGATCGATCAGGGCCCGAGTCTCAAGGGTCTTTTTTCCGGTGTGCGAGCAG  
CACTATGGCGGTGGAGCAGTATACCGACCCCTTGTGCTGGAGAAGGGACGTAAAGCGACGTCCGTATAGT  
AGCACGTNTCGGGCTTGGGGGTGATGTGCCGCTGGAGGGCGAGGGGCCAGAAGCTCTTCTTGTGGGCCTG  
TTGTCTGACCGAGAGGGTTCGAGCGCTACGGGGATCACGCATGTGGAGTAAGGTGTGGTGGTCTTTTTTG  
AAATTTTGCACCTTGGCTCCACTGCGGCATGATTCCCCTGAATGCTGATGAGCCAGGCAGTTGGAGCAATAT  
TTGTTAATTAACACGGCTCGGAGACGCTTCTCGGGCGTGAGCTTCAAGAAGCGCTGACACTTGCCTAGCG  
CATGGATGCCTCTACACACCCGGCATCTAAAGGAGTCCGTTCTTGACGTTGATTGGATGCCTTCGTTGAC  
GGTGCCATGCTGGTTCTCTACAGAGGAGTGAACCTGGAGAATAAGATGTAGGANAGGTGTTATTATGTGAT  
GGTTTTGTTTTGAAAGAGGGATTAGTTGCTTTTAAGGATTAGTCGGTGGTGCTATTTGCCTCAGTAGGAAG  
AAGGACCAATTTGGCTATTGGCCTTCGGATGACACCACGAGCGGTAAGCACGTCCACTACGCGGACCTTG  
TCATCTGTGCCTGGGCAAGCCAGCTGGACTCGGCCAAGGCGCCATTCATTTATTGGTATGTTATCTTCCTT  
GATAATCACCATATCACCGACTTGGAGGTCCCTTGTAGGGGACTGCCATTTGTTTCGCTTATGGAGCTCTT  
TCAAATACTCATTCTTCCACCGTAAGCAAAATTGCTGGTGGAGCGCTTTGAGTCGCTGCCAGCGGTTAATT  
ATAGAAATAGCGTCTTCTTTGATTACTGGCTCGTTAGTTGACAGAAGAGGGGCCACCAACTAGGAAGTGGC  
CTGGACTNAGAGCCAATAAATCAGTCGGATCTTCCGACATTGGAGAGATTGGCCTGGAGTTAAGGCAGGC  
TTCAATCTTGGAGAGGAGAGTCGCGAACTCCTCAAATGTATATTTTGAGGATGCGGTGGACTTGTAGAAG  
TGGGTCTTAAAGCTTTTGACACCTGCTTCCCACAATCCGCCCATGTGAGGAGCGCCAGGAGGATTGAAAT  
GCCAACACAAGTTTTGATGGCTATGCTTGGATAAGATGAGCTCTTTGGTCGCTTGCAAGAAATCTCTCGAA  
AGAACGGATGACGCTCCACAAATGTTTTCCCATATCTGAGTACATCTGTTGTGGAAGGCCACGTCTTGC  
TATAAATCGCGAAAATGCGGCCAGGAATCTCTCCGTGGTTAGATCTGTGGTGGCTTCTAAATGGATTGCTT  
TCGTGCTGAAACAAACGAAGACACAGACATAACCCTTGGTAATTTTGCATGCTCGACCAATGTAGCTTTTA  
ATATCGAAAGGTCCGGCAAAGTCTACACCCGTATGTGTGAAGGGTCGGGAAAAGGTTGATCTCGCCCTTG  
GGAGTTCGCCCATAAAGTTGGGTCTGGAGTCGTCTACGGTGTATTACACAGACCTTGCAGGAGTTTATGGTA  
GATTTTACCAGGACCTTGAAGCTTTGGGATCCAGTATTTGGCTCTTATGAGGCGCATTACCAACTGATTGCC  
TCCGTGAAAACAAATGAGGTGGGTAAATCGGACCAGGAGGCGTGAAAAATCACAATTGGCCGGAATGAT  
TATGGGGTGTGCTCATCATAGCCTAACGAGGTTGACGCTCTCACCCGTCCACAGGATCGCAGAATACCC  
CTTTGATCGATGAAAGGGGTTAAATTGCGAATGCTGCTTATCCTTGAATTGGCTTCTTATCGAGCAAACA  
GCTATACTCCTTAGGATAAGCTTGGCGTTGAGTATACTCGATAAGTCGGAACCTGAACCTCTCGTAAGTTCTT  
CATTACGGAGCTCGGCGGGAAAGTGGATCGCTGGATTTCTACAGCGCTGGATAAAGCGACAGACATATGC

GATAACTCGCAATGCCTTGTCTGAATCTGGAGAATCGTTCCAGAAGGTTATAGGAGGGTAGCTGTGAGACA  
TTGCACTTCACTGCGCGTTGTTCAATCTCTGTCTCAAGTACCGTAACAGGAAGTGGCCATTGGTTTTGTGGT  
AGTTGTAACCATTCGGGTCCATGCCACCACAAAGTGCTGCCCAATAGGTCCCGAGGAGAAACCCCCGACT  
AGCTAGGTCAGCTGGGTTATGTTCCGGATCGAACATGGGACCATTGCCATTGGTTGATGATATCTTGGCTAC  
CCGGTTAGCCACAAAGGTAGACCATTTCATGGAGGTTTATCCAACCAGGCAAGAACAATAGTGGAGTCT  
GTCCAATTGAAATTTTCNTTACTCTGGATGGGGAGCTGAGGAATAAGAGCCGTGGTGAGCTCGGAAAGAA  
GGACGGCGCCACACAGCTCTAAGCGTGGTAGTGATACCGTCTTAAGTGGCGCGACTCTCGTTTTTGTCTGCG  
AGAAGGTGAGTGGAGATGCATCCGTTGATCTCGACGCGCAAATAAAGTGCAGCACCATATGCGCGCTGGG  
ACGCGTCGCAGAAGCCGTGAAACTGCACCTTTGCCTTTTGCTGAAAATCGACCCATCTTGGAATACGGATC  
TCTTCGAGAGAGGGATAGTCGGTTAGGAAGTCATGCCAACGTTGAACGAGATCTTCCGGCAGGGAATCAT  
CCCACCCAGCTCTTGAGCCAGATCTCTTGATGAAAATCTTTGCTCGAACTATCACAGGTGCTAGCCAT  
CCAGCAGGATCGAACAAATTCGCAATCTGTGATAGTACTTCACGTTTAGTGAGCGAAGGCTGAGATACCA  
TTTTGGACGGAGCAAAGAAAACTGGTCTGTTGTGGCTTGCCATCGAATGCCTAGCGTTTTAGCGACGCTG  
GCCTCTTCGATTTCTAAGAAATCCGCACACAGTAAGTGGTCCCTTGGTATTCCTTTAACACTTCCTTTGTG  
TTGGATGTCCACTTTCTCAGAGGGAACCCAGCTCTGTGAGTGCCATGCGGAGTTCTGCAATGGCTGAAAT  
TGCTTGTGGCTTCGTGTGTGCCCCGTGCTAGAACATCATCGACATACATATAATTTCAATTATATCGGATG  
CGATGGGACAATGTTCTCGTATATCACGAGCAAGTTGACGGAGGACCCGGATTGCGAGGTATGGGGCACA  
GTTTACCCCAAAGGTAAGTGTATTGAGTTCGAAGTCGCAAAGTTCTTCGTTCTCATTGCGAAATAGTATTC  
GTTGGTAGGGCGTATGTCTTGATCGACCTGGATTTGCCGATACATCTTGGTTATATCGGCATTGAAAACG  
TAGCGGTAGAATCGCCACTTTAGTATCTGAATCGTCAGATCGGATTGGAGTACTGGTCCCGTGTGTAGGAT  
ATCATTTAGACTTTTGCCATTGGAAGACGGGCTGGAGGCGTTAAACACAACGCGAACCTTTGTTGTGGTGC  
TGTCGGGCTTAAAAACAGCATGATGCGGCAGGTAAAAATTATTGGGGTTGCTGTTTGGAGAGACTTGTGT  
CATATGACCTAAGTCGAAGTACTCCCGAATCACGGAGTCGTAAGTCTCTTTCAAAGGAGGGTTTCTTTTAA  
AACGATTCTCGTTCTTTAGAACTGAGCTAGTGCGATAGATCTTGAATGTCCTAAGTCTATGTGATTAGGT  
TCTTGGAAGGTAGGGTGACTACATATCTGCCATTCTCGTTCCCTGTTGTTGTTTCGGATGAAATTACTCTCA  
CAAAGGAGTCGGAGCTCTTTACCAGTTTGACTGGAATGTCCTCCACCTCCCAAATTTTGTGAGAATGAC  
GTCTAATTGCTCTTCTTGAGAGACAGATATTCGAGTCGAGAATGACGAGATTGCGGTGGATGCGGTCTTTG  
AAACTGGGCTGTAAATCCACCCGAAAATAGTTTCTGGCCAGCAACGTGCCACATATATTAGGATG  
GGAGCCGCCCGTTAGTATGGACGGTAGGATATCAGCGCCAATCAGCACATCTATCTGCGAACTCTTGTGG  
AAATTAGGGTCCGCTAACTGGAGTTTTGGCAGGGTTGTCAATAAACTTTGGGGGATCGAACATGATGGTA  
GATTCCCTGCCAAATGTGGTAGGACGTAGGCTGATGCCTCGATTTGGATACGAGGCTTGAAGGAGAGCC  
AATATTAATAATGGCAGAGCTTGCGAGGCTGGGCTGCAACAGCTTGATTTAATCCCGATACTTGTGCCTGTA  
CGGATTTGTACGGCAGCTTTATCAGGTGGAAGAGTCGCTCGGAAATAAATGTTGCCTCTGATCCCGAGTC  
GATCAGTGCACGAGCTGTATAATTTACACCCAAATGGCGAACATATATAACAGCCGTACTTAGGAGAACAA  
CCGTGGGTGTTAATTGCAACATAATTGTGAACATTCGTTTGTGTTGGGATGGAGTGGACTGTATGGATTGATT  
GGAGGGAGCTGTTGCTTGTGGCATGGAGACTACTGTAGGGCTCAATTGTGGAGTGTCACTACGATGCAAG  
AGCGTATTGTGACGACCCTTGCACGTAAAACAATTGTGAGCACTTGTGCAATCCCTTAACTGATGACCCCT  
AGCGAAACAGTTCAAACATAGTTTTTGTCTGTTTGATGTAAGTTGCCCGTTCGCTGACGGGCATTTGGAGAA  
ATCGTGGGCACAGACGGATAGGGTGATTCTCCCTGGAGCACAATTTGCAGGCTTGCGGCTTGTTAGCGAC  
CTTATTCTCAAATGAGTTAAGCCTTCTAGTGGTAGGAGGTTCTGTTTCAACAATTCTGGAGTGCCTGGAG  
TATTTGCGCTTGGCTTAAGCTCTTCTATCGCTTCTAGAGTGCATAGCGTTCTAAGAGAAAGGCGTTCATC  
TCAAGCCAAGATGAGATGTCGTTTTTTCTGGAGATGGACTGTTCCCATAGGAGAGTGTTAATTTGGGTAA  
TTTGAGGAACATAGGAACACGAGGATACAGTCCCAGTTTTCTATGTTGATTTTCGGATAACTCCAGAGCT  
GTTAAGCAACCTTGAATGGTGCTCTGAAGTTCCTTAATTGCCGTTCCAGACTCTTGGGAGATTGGCTGCAG  
GTTGAAAAGAATCTTGAGCTGGCTGTTGACTAACAATTTTCGGTTCTCAAACGCTCAGTCAGATTGGCCC  
AGGCTGATCGGAAGCCATCGTTAGTCAAAGGTGACTTCGATACAATCGCCTGAGCCTCACCGCTGGTTTTTC  
GCATTGAGATGGAATAATTTCTCGACCTCTGATAACCTAGGATTATTTATGTAAATTGCGGTAAAGAGGTC  
TCGAAATGTGGGCCAACGTATGTAATCTCCGCTGAAGATTTCTGTGTGCGCAAGGAGGTAAGCGACACCCT  
GTGGGAACATATGTCGGAATGGTGGACTGAGCGGATGGTCTATTTTGGGCGTTAGCGGTATCGATTTGCTC  
GCTAAGTTTAGCGGCGCATCTCTCATATACCATGTAACAATAGTCGTACTTGGACTGCATAACTGAAATGG  
TTTCCAGTGAACCGGCTTCCGAGATTATTGTTGAGCCGACCTCGTACTCTTTTCAACCTTGTCCCACAAGG  
CTCGCACTTGGTCCCGACGGACCTGGCACGTATAGAGAGACGGGTCAGAGCCTCCAGGAGTGTTATTTTT  
GCCTCAAACCTGACTTAGCCGATCAGTGACAGCAATAAACTTGATTAAGGCCGCGTCTGTTCATATTTGGGC  
CGTTTTGGTATTAGCTCGCGTGGAATCGGACTAGATCTTGTGCTAATGGTTGCCTTAGTGCGTCCGACTG



CAGTGGTCAGGGATGCTTCGCTTTTTAGCTTTGGACGGCGGGCGACTGATTTTTATCAGTGGACTTGGCCT  
CGAACTAAGAGGTGCCTTAACAGTTCCCCCTTGGCGTGGACGCGGATGATTTCGCTTTTAGTCCGGGACGAT  
GTTTCCCTTTTCGACTCTAAGGGCTGCTGTTGGAGACGGAGAAGTTCTGGAGGTGCTTGCGGACGGAACTG  
CTAATTGATGCTTTGTTTCTTCCCCTTTGCCAGTTGGCATACTAGGCGGAAGCGCTTGGGTAGGAAAAACA  
AAGGTGCTCGTTTCTAGTAGTAGAGGTTGCGATGCTTAAAACAAAGAAACACTGGAATGCCGGTACAGGT  
AAATAATCGAGTTTATAATTCGATTGAGATTGCGGAAGATTTAAATAATTTTGCTTAAAATCAAATTTAT  
TTGATTTAATTAAATTTAATTAATAAATTTATTTGACTTGGTAATTTAAAAAATACGATTATTTATTAAACA  
CGGGAAATAATAATAAAGAATTTCGATGCTCGTTTTTCGATAAATTTATTATTATATTAGTCTTTTGAATACG  
GTAACGGTTGGTTTATTTTACTTTTTGTGGTACTCATAAAAAATACCCACTATTGTGGCTGAGTACACACCG  
CTGACAAAATGTAGAACTTCGAAGTTAATGTGTAGTGTTTTTTGTTTATTTTACAATAAATTAGTAGTATTAT  
TAATCTATTAATTATGATTGTTGTGTTTTTATTTGGTGCGTCTCGGAACAAAGAGTAATTGTATGGGAATGT  
GTGCAATTGCATAAAAAACGTGTAATTGGAGTACGGATCGGCAGCTGTGGTTTTTACATATGTGTGTGGTGT  
GTACATACGCACATACGCCGGTTGAAATTGCAATTTATTACTATAATATTGCTGTGTTATAATATTGCTGT  
GGATTGTGCACTAAAAATATTATATGTGGACACACATAGTACATATGATTTGTGGATTTATTTATCGGATG  
TATGTACTATGTGGTTGCACAAATATATTCGTTTGCCTATGCACAATTATAAGTTAAGAAACTGAATTGG  
AGTTTGTGTTTATTTTTATTAAGTAATACAGGGTGCAATAAATTATAAGTTAAGAGAATGAATTGGAGTTT  
GTGTTTATGTTTATTAAATAATAAGGTTAAATATAGTGTCTATTCAAATGCATATGGGCAATTATATTCG  
GATTGAATATATGTATGTATGTATGTACAATACGTGCTGGTGAACCTGGTGTATGTTTGTGTGTCGG  
ACCAAGAACATGAATTAACAATATTAATTAGGAAACAATATTGTGAAGCAACTGTGCGGATTAAGTGCGG  
ACACGTAATTAAAAAATNTTTTTTATAGTTAGGAAAGTGCACGAGTGCGTACGTATGTACATACAAAAA  
ATGTTGAAGTGGATTTCTTTTGTAGTTGGAAGTAACTAACACAAAATTTAACTAACTGTTTTTAGTTTTGT  
GGTCCGATAATTTATATATATTCAGAAATATATATTGCCAATCAGTTTTCTTAAAGAAAAAAAATATGGCG  
GAAAAATATGGCGGATATTGCCGAATATATATAGAAAGGAAATTTTGTATTTACTTATCTTTGCCAAAAA  
ACTTGTGTAGGGGCGATCGGTTTATATATAATCCGGCTCGAAGGACCAATGTTTGTGGGGGTGGCGTCAG  
ATAAATAATCCTTGATTATTGTTGTTGGTGAAAAAACCACTTTATTAGAAGTTTCTGCTGCATGTAACAAA  
CTCTGCTGGTTAAGTGATTTTACATATTTTTGGTTGGAGTGATGGAGGTGGAAAGGAGACCACAAGGAGA  
GTGCTGAGCGCATCTGGGATCGACTTAGTGAGTGAGTCTCTCTCAGTGAGTGAGTCTGTCTCACTGAGTGA  
CTCTCTCACACTGAGTGAGGCTCAGTCAATGCTGTGTTACACTAGCACTGAAGTGGCATGAACA

>9\_rnd-1\_family-306\_\_LTR\_\_Pao  
TGTTTCATGCCAGTTCAGTGCTAGTGTGAACACAGCATTGACTGAGCCTCACTCAGTGTGAGAGAGTCACTC  
AGTGAGACAGACTCACTCACTGAGAGAGACTCACTCACTAAGTCGATCCCAGATGCGCTCAGCACTCTCC  
TTGTGGTCTCCTTTCCACCTCCATCACTCCAACCAAAAATATGTAAAATCACTTAACCAGCAGAGTTTGT  
ACATGCAGCAGAACTTCTAATAAAGTGCTTTTTTTCACCAACAACAATAATCAAGGATTATTTATCTGACG  
CCACCCCCACAAACATTGGTCCCTTCGAGCCGGATTATATATAAACCAGATCGCCCCTACACAAGTTTTTTGG  
CAAAGATAAGTAAATACAAAATTTCTTTCTATATATATTCGGCAATATCCGCCATATTTTTCCGCCATAT  
ATTTTTTCTTTAAGAAAACCTGATTGGNAATTTTCTGAATATATATAAATTATCCGACCACAAAACCTAAAAA  
CAGTTTAGTTAAATTTTGTGTTAGTTACTTCCAACCTACAAAAGAAATCCACTTCAACATTTTTTGTATGTAC  
ATACGTACGCACTCGTGCACTTTCCTAACTATAAAAAAAATTTTTTTAATTACGTGTCCGCACTTAATCCG  
ACAAGTTGCTTCACAATATTGTTTCCTAATTAATATTGTTAATTCATGTTCTTGGTCCGACACACAAACATA  
CACCAGGTTACCAGCACGTACGTACATACATACATACATACATATATTCAATCCGAATATAATTGCCCAT  
ATGCATTTTTGAATAGACACTATATTTAACCTTATTATTTAATAAANATAAACACAAACTCCAATTCANTC  
TCTTAACCTTATAATTGTGCATAGTGCAAACGAATATATTTGTGCAACCACATAGTACATACATCCGATAAA  
TAAATCCACAAATCATATGTACTATGTGTGTCCACATATAATATTTTTTAGTGCACAATCCACAGCAATAT  
TATAACACAGCAATATTATAGTAATAAATTGCAATTTCAACCGGCGTATGTGCGTATGTACACACCACAC  
ACATATGTAAAAACACAGCTGCCGATCCGCACTCCAATTACACGTTTTTATGCAATTGCACACATTCCCA  
TACAATTACTCTTGTTCCGAGACGCACCAATAAAAAACACAACAATCATAATTAATAGATTAATAATACT  
ACTAATTTATTGTAAATAAACAACAAACACTACACATTAACCTTCGAAGTTCTACATTTGTGTCAGCGGTGTGTA  
CTCAGCCACAATAGTGGGTATTTTATGAGTACCACAAAAAGTAAAAATAAACCAACCGTTACCGTATTCA  
AAGACTAATATAATAATAAAATTATCGAAAACGAGCATCGAATTCTTTATTATTATTTCCCGTGTTTAATA  
AATAATCGTTTTTTTTAAATTACCAAGTCAAATAAATTTATTAATTAAATTTATTAAATCAAATAAATTTTGA  
TTTTAAGCAAAATTTTAAATCTTCCGCAATCTCAATCGAATTATAAACTCGATTATTTACCTGTACCGGC  
ATTCCAGTGTTTCTTTGTTTTAAGCATCGCAACCTCTACTACTAGAAGCGAGCACCTTTGTTTTCTACCCA  
AGCGCTTCCGCCTAGTATGCCAACTGGCAAAGGGGAAGAAACAAAGCATCAATTAGCAGTTCCGTCCGCA  
AGCACCTCCAGAACTTCTCCGTCTCCAACAGCAGCCCTTAGAGTCGAAAGGGAAACATCGTCCCGGACTA

AAAGCGAATCATCCGCGTCCACGCCAAGGGGAAGTGTAAAGGCACCTCTTAGTTCGAGGCCAAGTCCACT  
GATAAAAATCAGTCGCCCCGCGTCCAAAGCTAAAAGCGAAGCATCCCTGACCACTGCAGTCGGACGCACT  
AAGGCAACCATTAGCACAAAGATCTAGTCCGATTTCCACGCGAGCTAATACCAAAAACGGCCCAAAATATGA  
CAGACGCGGCCTTAATCAAGTTTATTGCTGTCACTGATCGGCTAAGTCAGTTTGAGGCCAAAATAAACAC  
TCCTGGAGGCTCTGACCCGTCTCTCTATACGTGCCAGGTCCGTCGGGACCAAGTGCGAGCCTTGTGGGACA  
AGGTTGAAAAAGAGTACGAGGTCGGCTCAACAATAATCTCGGAAGCCGGTTCAGTGGAACCATTTTCAGT  
TATGCAGTCCAAGTACGACTATTGTTACNTGGTATATGAGAGATGCGCCGCTAAACTTAGCGAGCAAATC  
GATACCGCTAACGCCCAAAATAGACCATCCGCTCAGTCCACCATTCCGACATATGTTCCACAGGGTGTG  
GCTTACCTCCTTGCGACACAGAAATCTTCAGCGGAGATTACATACGTTGGCCACATTTTCGAGACCTCTTT  
ACCGCAATTTACATAAATAATCCTAGGTTATCAGAGGTCGAGAAATTATTCCATCTCAATGCGAAAACCA  
GCGGTGAGGCTCAGGCGATTGTATCGAAGTCACCTTTGACTAACGATGGCTTCCGATCAGCCTGGGCCAA  
TCTGACTGAGCGTTTTTGAGAACCGAAAATTGTTAGTCAACAGCCAGCTCAAGATTCTTTTCAACCTGCAGC  
CAATCTCCCAAGAGTCTGGAACGGCAATTAAGGAACTTCAGAGCACCATTCAAGGTTGCTTAACAGCTCT  
GGAGTTATCCGAAATCAACATAGAAAACCTGGGACTGTATCCTCGTGTTCTCTATGTTCTCTCAAATTACCCA  
AATTAACACTCTCCTTATGGGAACAGTCCATCTCGAAAAAAACGACATCTCATCTTGGCTTGAGATGAAC  
GCCTTTCTCTTAGAACGCTATCGCACTCTAGAAGCGATAGAAGAGCTTAAGCCAAGCGCAAATACTCCAG  
CGCACTCCAGAATTGTTTCGAACAGAACCCTCCTACCCACTAGAAGGCTTAAGTCATTTGAGAATAAGGTGCG  
CTAACAAGCCGCAAGCCTGCAAATTGTGCTCCAGGGAGAATCACCTATCCGTCTGTGCCACGATTTCTC  
CAAATGCCCCGTCAGCGAACGGGCAACTTACATCAAACAGCAAAAACCTATGTTTGAAGTGTTCGCTAGGG  
GTCATCAGTTAAGGGATTGCACAAGTGCTCACAATTGTTTTACGTGCAAGGGTCGTCACAATACGCTCTTG  
CATCGTAGTGACACTCCACAATTGAGCCCTACGGTAGTCTCCATGCCACAAGCAACAGCTCCTCCAATCA  
ATCCATACAGTCCACTCCATCCCAACAAACGAATGTTTACAATTATGTTGCAATTAACACCCACGGTGTTT  
TCCTAAGCACGGCTGTTATATATGTTTCGCCATTTGGGTGTAAATTATACAGCTCGTGCACTGATCGACTCG  
GGATCAGAGGCAACATTTATTTCCGAGCGACTCTTCCACCTGATAAAGCTGCCGTACAAATCCGTACAGG  
CACAAGTATCGGGATTAAATCAAGCTGTTGCAGCCCAGCCTCGCAAGCTCTGCCATTTTAATATTGGCTCT  
CCTTCCAAGCCTCGTATCCAAATCGAGGCATCAGCCTACGTCCTACCACATTTGGCAGGGAATCTACCATC  
ATGTTTCGATCCCCCAAAGTTTATTGACAACCCTGCCAAAACCTCCAGTTAGCGGACCCTAATTTCCACAAGA  
GTTTCGCAGATAGATGTGCTGATTGGCGCTGATATCCTACCGTCCATACTAACGGGGCGGCTCCCATCCTAAT  
ATATGTGGCACGTTGCTGGGCCAGGAACTATTTTCGGGTGGATTTTAACAGGCCCAGTTTCAAAGACCG  
CATCCACCGCAATCTCGTCATTCTCGACTCGAATATCTGTCTCTCAAGAAGAGCAATTAGACGTCATTCTC  
ACAAAATTTTGGGAGGTGGAGGACATTCCAGTCAAACCTGGTAAAGAGCTCCGACTCCTTTTGTGAGAGTA  
ATTTTCATCCGAACAACAACAAGGAACGAGAATGGCAGATATGTAGTACCCTACCTTTCCAAGAACCTAA  
TCACATAGACTTAGGACATTCAAGATCTATCGCACTAGCTCAGTTTCTAAAGAACGAGAATCGTTTAAAA  
AGAAACCCTCCTTTGAAAGAGCAGTACGACTCCGTGATTCGGGAGTACTTCGACTTAGGTCATATGACAC  
AAGTCTCTCAAACAGCAACCCCAATAATTTTTACCTGCCGCATCATGCTGTTTTTAAGCCCGACAGCACC  
ACAACAAAGGTTTCGCGTTGTGTTAACGCCTCCAGCCCGTCTTCCAATGGCAAAGTCTAAATGATATCCT  
ACACACGGGACCAGTACTCCAATCCGATCTGACGATTCAGATACTAAAGTGGCGATTCTACCGCTACGTTT  
TCAATGCCGATATAACCAAGATGTATCGGCAAATCCAGGTCGATCCAAGACATACGCCCTACCAACGAAT  
ACTATTTTCGCAATGAGAACGAAGAACTTTGCGACTTCGAACTCAATACAGTTACCTTTGGGGTAAACTGTG  
CCCCATACCTCGCAATCCGGGTCTCCGTCAACTTGCTCGTGATATACGAGAACATTGTCCCATCGCATCC  
GATATAATTGAAAATTATATGTATGTGATGATGTTCTAGCAGGGGCACACACGAAGCCACAAGCAATTT  
CAGCCATTGCAGAACTCCGCATGGCACTCGACAGAGCTGGGTTCCCTCTGAGAAAGTGGACATCCAACAC  
AAAGGAAGTGTTAAAAGGAATACCAAGGGACCACTTACTGTGTGCGGATTTCTTAGAAATCGAAGAGGCC  
AGCGTCGCTAAAACGCTAGGCATTCGATGGCAAGCCACAACAGACCAGTTTTTTCTTTGCTCCGTCCAAAAT  
GGTATCTCAGCCTTCGCTCACTAAACGTGAAGTACTATCACAGATTGCGAAATTGTTTCGATCCTGCTGGAT  
GGCTAGCACCTGTGATAGTTCGAGCAAAGATTTTCATGCAAGAGATCTGGCTCCAAGAGCTGGGGTGGGA  
TGATTCCCTGCCGGAAGATCTCGTTCAACGTTGGCATGACTTCCTAACCGACTATCCCTCTCTCGAAGAGA  
TCCGTATTCCAAGATGGGTGATTTTCAGCAAAAGGCAAAGGTGCAGTTTCACGGCTTCTGCGACGCGTCC  
CAGCGCGCATATGGTGCTGCACTTTATTTGCGCGTCGAGATCAACGGATGCATCTCCACTCACCTTCTCGC  
AGCAAAAACGAGAGTCGCGCCAGTTAAGACGGTATCACTACCACGCTTAGAGCTGTGTGGCGCCGTCCTT  
CTTTCCGAGCTCACCACGGCTCTTATTCCTCAGCTCCCCATCCAGAGTAAAGAAAATTTCAATTGGACAGA  
CTCCACTATTGTTCTTGCTGGTTGGATAAACCTCCATGCAAATGGTCTACCTTTGTGGCTAACCGGGTAG  
CCAAGATATCATCAACCAATGGCAAATGGTCCCATGTTTCGATCCGAACATAACCCAGCTGACCTAGCTAG  
TCGGGGGTTTCTCCTCGGGACCTATTGGGCAGCACTTTGTGGTGGCATGGACCGGAATGGTTACAACCTACC

ACAAAACCAATGGCCAGTTCCTGTTACGGTACTTGAGACAGAGATTGAACAACGCGCAGTGAAGTGCAAT  
GTCTCACAGCTACCTCTCTATAACCTTCTGGAACGATTCTCCAGATTTCGACAAGGCATTGCGAGTTATCGC  
ATATGTCTGTCGCTTTATCCAGCGCTGTAGAAATCCAGCGATCCACTTTCCCGCCGAGCTCCGTAATGAAG  
AACTTACGAGAGTTCAGTTCGACTTATCGAGTATACTCAACGCCAAGCTTATCCTAAGGAGTATAGCTGT  
TTGCTCGATAAGAAGCCAATTCAAGGATCAAGCAGCATTTCGCAATTTAACCCCTTTCATCGATCAAAGGG  
GTATTCTGCGATCCTGTGGACGGGTGAGAGCGTCAACCTCGTTAGGCTATGATGAGCGACACCCCATAT  
CATTCGGCCAATTGTGATTTTTACGCCTCCTGGTCCGATTTACCCACCTCATTTGTTTTACGGAGGCAA  
TCAGTTGGTAATGCGCCTCATAAGAGCCAAATACTGGATCCCAAAGCTCAAGGTCCTGGTAAAATCTACC  
ATAAACTCCTGCAAGGTCTGTGTAATACACCGTAGACGACTCCAGACCCAACTTATGGGCGAACTCCCAA  
GGGCGAGATCAACCTTTTCCCGACCCCTTCACACATACGGGTGTAGACTTTGCCGGACCTTTCGATATTA  
AGCTACATTGGTTCGAGCATGCAAAATTACCAAGGGTTATGTCTGTGTCTTCGTGTGTTTCAGCACGAAAGC  
AATCCATTTAGAAGCCACCACAGATCTAACCACGGAGAGATTCTTGCCCGCATTTTCGCGATTTATCGCAA  
GACGTGGCCTTCCACAACAGATGTACTCAGATAATGGGAAAACATTTGTGGGAGCGTCATCCGTTCTTTCG  
AGAGATTTCTTGCAAGCGACCAAAGAGCTCATCTTATCCAAGCATAGCCATCAAAACTTGTGTTGGCATT  
CAATCCTCCTGGCGCTCCTCACATGGGCGGATTGTGGGAAGCAGGTGTCAAAAGCTTTAAGACCCACTTCT  
ACAAATCCACCGCATCCTCAAAATATACATTTGAGGAGTTCGCGACTCTCCTCTCCAAGATTGAAGCCTGC  
CTTAATCCAGGCCAATCTCTCCAATGTGCGGAAGATCCGACTGATTTATTGGCTCTAAGTCCAGGCCACTT  
CCTAGTTGGTGGCCCTCTTCTGTCAACTAACGAGCCAGTAATCAAAGAAGACGCTATTTCTATAATTAACC  
GCTGGCAGCGACTCAAAGCGCTCCACCAGCAATTTTGCTTACGGTGGAAGAATGAGTATTTGAAAGAGCT  
CCATAAGCGAAACAAATGGCAGTCCCCTACAAGGGACCTCCAAGTCGGTGATATGGTGATTATCAAGGAA  
GATAACATACCAATAAATGAATGGCGCCTTGGCCGAGTCCAGCTGGCTTGCCAGGCACAGATGACAAGG  
TCCGCGTAGTGGACGTGCTTACCGCTCGTGGTGTATCCGAAGGCCAATAGCCAAATTGGTCCTTCTTCCT  
ACTGAGGCAAATAGCACCACCGACTAATCCTTAAAAGCAACTAATCCCTCTTCAAAACAAAACCATCAC  
ATAATAACACCTGTCCTACATCTTATTCTCCAGTTCCTCTGTAGAGAACCAGCATGGCACCGTCAAC  
GAAGGCATCCAATCAACGTCAAGGAACGGACTCTTTNAGATGCCGGGTGTGTAGAGGCATCCATGCGCT  
ACGCAAGTGTGAGCGCTTCTTGAAGCTCACGCCCCGAGAAGCGTCTCCGAGCCGTGTTAATTAACAAATAT  
TGCTCCAAGTGCCTGGCTCATCAGCATTACAGGGGAATCATGCCGAGTGGAGCCAAGTGCAAAATTTGCA  
AAAAGGACCACCACACCTTACTCCACATGCGTGATCCCCGTAGCGCTCGACCTCTCGGTGACACAACAG  
GCCACAAGAAGAGCTTCTGGCTCCTCGCCCTCCAGCGGCACATACCCCCAAGCCCGAGACGTGCTACT  
ATACGGACGTGCTTACGTCCCTTCTCCAGCACAAGGGGGTTCGGTATATTGCCACCGCCATAGTGCTGCT  
CGACACCGGAAAAAGACCCTTGAGACTCGGGCTCTGATCGATCCATGTTGTTTCAGTAAGCCGCATTAATG  
CAACCGTGGCAAGGGCCTATGGCCTTTCCGTACACGCATTGGCGCAGAAGGAGCGTGACAGCCGTGCT  
ACGCTCCAAGACAACCTCAGATGTCTCGAGAAGTGGTCTTCATGGCTGACCCGCAACTCAGCTGCATAACT  
CCAGCCCGAGCCATCAGAGCGGACATGAAGGACCCGTTTCAGCAACGTGCTTTGGCGGACAACGAATGGT  
TCCGTCCATCTCCAGTCCCTTTGGTACTCGGCGCCGACGTCTACCCAGACATCATCCTACCAGGTATCCTC  
CCGAGCCAAGGCGGTCTGCCGATGGCTCAAAATACCAAGTTTGGATGGATACTCTCTGGCACATGCACGC  
AATAGGAATTCTTGCAATCTGCATATTGCCAGGGGAGAATGTTTCATGCCAGTTCAGTGCTAGTGGAACA  
CAGCATTGACTGAGCCTCACTCAGTGTGAGAGAGTCACTCAGTGAGACAGACTCACTCACTGAGAGAGAC  
TCACTCACTAANTCGATCCCAGATGCGCTCAGCACTCTCCTTGTGGTCTCCTTTCCACCTCCATCACTCCAA  
CCAAAAATATGTAAAATCACTTAACCAGCAGAGTTCGTTACATGCAGCAGAACTTCTAATAAAGTGCTT  
TTTACCAACAACAATCAAGGATTATTTATCTGACGCCACCCCAACAACA

>9\_rnd-1\_family-324\_\_LTR\_\_Pao

TGTTTCATGCCAGTTCAGTGCTAGTGTGAACACAGCATTGACTGAGCCTCACTCAGTGTGAGAGAGTCACTC  
AGTGAGACAGACTCACTCACTGAGAGAGACTCACTCACTAAGTCGATCCCAGATGCGCTCAGCACTCTCC  
TTGTGGTCTCCTTTCCACCTCCATCACTCCAACCAAAAAATATGTAAAATCACTTAACCAGCAGAGTTTGT  
ACATGCAGCAGAACTTCTAATAAAGTGTTTTTTTACCAACAACAATAATCAAGGATTATTTATCTGACG  
CCACCCCAACAACATTGGTCCTTCGAGCCGGATTATATATAAACCGATCGCCCTACACAAGTTTTTTGG  
CAAAGATAAGTAAATACAAAATTTCTTTCTATATATATTCGGCAATATCCGCCATATTTTTTTTTTTCTTTA  
AGAAAACCTGATTGGCATTATTTTCTGAATATATATAAATTATCCGACCACAAAACCTAAAAACAGTTTAGTT  
AAATTTTGTGTTAGTTACTTCCAACCTACAAAAGAAATCCACTTCAACANTTTTTGTATGTACATACGTACG  
CACTCGTGCACTTTCTAATAATAAAAAAATTTTTTAATTACGTGTCCGCACTTAATCCGACAAGTTGCTT  
CACAATATTGTTTCTAATAATATTGTTAATTCATGTTCTTGGTCCGACACACAAACATACACCAGGTTT  
ACCAGCACGTATTGTACATACATACATACATACATATATTCAATCCGAATATAATTGCCCATATGCA  
TTTTGAATAGACACTATATTTAACCTTATTATTTAATAAAAAATAAACACAACTCCAATTCANTCTCTTAA

CTTATAATTGTGCATAGTGCAAACGAATATATTTGTGCAACCACATAGTACATACATCCGATAAATAAATC  
CACAAATCATATGTACTATGTGTGTCCACATATAATATTTTTTAGTGCACAATCCACAGCAATATTATAAC  
ACAGCAATATTATAGTAATAAATTGCAATTTCAACCGGCGTATGTGCGTATGTACACACCACACACATAT  
GTAAAAACACAGCTGCCGATCCGTA CTCAATTACACGTTTTTATGCAATTGCACACATTCCCATACAAT  
TACTCTTGTTCCGAGACGCGACCAAATAAAAAACACAACAATCATAATTAATAGATTAATAATACTACTAATT  
TATTGTAAATAAACAACAACTACACATTAACCTTCGAAGTTCTACATTTGTGTCAGCGGTGTGTACTCAGCC  
ACAATAGTGGGTATTTTATGAGTACCACAAAAAGTAAAATAAACCAACCGTTACCGTATTCAAAGACTAA  
TATAATAATAAAATTATCGAAAACGAGCATCGAATTCTTTATTATTATTTCCCGTGTTTAATAAAATAATCG  
TATTTTTTTTAAATTACCAAGTCAAATAAATTTATTAATTAATTNATTAATCAAATAAATTTTGATTTTAA  
GCAAAATTATTTAAATCTTCCGCAATCTCAATCGAATTATAAACTCGATTATTTACCTGTACCGGCATTCC  
AGTGTTCCTTTGTTTTAAGCATCGCAACCTCTACTACTAGAAACGAGCACCTTTGTTTTCTACCCAAGCGC  
TTCCGCCTAGTATGCCAACTGGCAAAGGGGAAGAAACAAAGCATCAATTAGCAGTTCGGTCCGCAAGCAC  
CTCCAGAACTTCTCCGCTCTCCAACAGCAGCCCTTAGAGTCGAAAGGGAAACATCGTCCCGGACTAAAAGC  
GAATCATCCGCGTCCACGCCAAGGGGAAGTGTAAAGGCACCTCTTAGTTCGAGGCCAAGTCCACTGATAA  
AAATCAGTCGCCCCGCCGTCCAAAGCTAAAAGCGAAGCATCCCTGACCACTGCAGTCGGACGCACTAAGGC  
AACCATTAGCACAAGATCTAGTCCGATTTCCACGCGAGCTAATACCAAAACGGCCCCAAAATATGACAGAC  
GCGGCCTTAATCAAGTTTATTGCTGTCAGTATCGGCTAAGTCAGTTTGAGGGCAAAAATAAACACTCCTGG  
AGGCTCTGACCCGTCTCTCTATACGTGCCAGGTCCGTCGGGACCAAGTGCGAGCCTTGTGGGACAAGGTT  
GAAAAAGAGTACGAGGTTCGGCTCAACAATAATCTCGGAAGCCGGTTCCTGGAACCAATTTAGTTATGC  
AGTCCAAGTACGACTATTGTTACATGGTATATGAGAGATGCGCCGCTAACTTAGCGAGCAAATCGATAC  
CGCTAACGCCCAAATAGACCATCCGCTCAGTCCACCATTCGACATATGTTCCACAGGGTGTGCGCTTAC  
CTCCTTGCGACACAGAAATCTTCAGCGGAGATTACATACGTTGGCCACATTTTCGAGACCTCTTTACCGCA  
ATTTACATAAATAATCCTAGGTTATCAGAGGTTCGAGAAATTATTCCATCTCAATGCGAAAACAGCGGTG  
AGGCTCAGGCGATTGTATCGAAGTCACCTTTGACTAACGATGGCTTCCGATCAGCCTGGGCCAATCTGACT  
GAGCGTTTTGAGAACCGAAAATTGTTAGTCAACAGCCAGCTCAAGATTCTTTTCAACCTGCAGCCAATCTC  
CCAAGAGTCTGGAACGGCAATTAAGGAACCTTCAGAGCACCATTCAAGGTTGCTTAACAGCTCTGGAGTTA  
TCCGAAATCAACATAGAAAACCTGGGACTGTATCCTCGTGTTCCTATGTTCTCCAAATTACCCAATTAAC  
ACTCTCCTTATGGGAACAGTCCATCTCCAAAAAACGACATCTCATCTTGGCTTGAGATGAACGCCTTTCT  
CTTAGAACGCTATCGCACTCTAGAAGCGATAGAAGAGCTTAAGCCAAGCGCAAATACTCCAGCGCACTCC  
AGAATTGTTGGAACAGAACCTCCTACCACTAGAAGGCTTAACCTCATTTGAGAATAAGGTGCTAACAAGC  
CGAAGCCTGCAAATTGTGCTCCAGGGAGAATCACCTATCCGCTCTGTGCCACGATTTCTCCAAATGCCC  
GTCAGCGAACGGGCAACTTACATCAAACAGCAAAAACCTATGTTTGAAGTGTTCGCTAGGGGTTCATCAGT  
TAAGGGATTGCACAAGTGCTCACAATTGTTTTACGTGCAAGGGTTCGTCACAATACGCTCTTGCATCGTAGT  
GACACTCCACAATTGAGCCCTACGGTAGTCTCCATGCCACAAGCAACAGCTCCCTCCAATCAATCCATAC  
AGTCCACTCCATCCCAACAAACGAATGTTTACAATTATGTTGCAATTAACACCCACGGTGTCTCCTAAGT  
ACGGCTGTTATATATGTTGCGCATTTGGGTGTAAATTATACAGCTCGTGCAGTATCGACTCGGGATCAGA  
GGCAACATTTATTTCCGAGCGACTCTTCCACCTGATAAAGCTGCCGTACAAATCCGTACAGGCACAAGTAT  
CGGGATTAAATCAAGCTGTTGCAGCCCAGCCTCGCAAGCTCTGCCATTTTAATATTGGCTCTCCTTCCAAG  
CCTCGTATCCAAATCGAGGCATCAGCCTACGTCTACCAATTTGGCAGGGAATCTACCATCATGTTTCGAT  
CCCCCAAAGTTTATTGACAACCCTGCCAAAACCTCCAGTTAGCGGACCCTAATTTCCACAAGAGTTTCGCAG  
ATAGATGTGCTGATTGGCGCTGATATCCTACCGTCCATACTAACGGGGCGGCTCCCATCCTAATATATGTGG  
CACGTTGCTGGGCCAGGAACTATTTTCGGGTGGATTTTAACAGGCCAGTTTCAAAGACCGCATCCACC  
GCAATCTCGTCATTCTCGACTCGAATATCTGTCTCTCAAGAAGAGCAATTAGACGTCAATTCTCACAAAATT  
TTGGGAGGTGGAGGACATTCCAGTCAAACCTGGTAAAGAGCTCCGACTCCTTTTGTGAGAGTAATTTTCATCC  
GAACAACAACAAGGAACGAGAATGGCAGATATGTAGTCACCCTACCTTTCCGAGAACCTAATCACATAGA  
CTTAGGACATTCAAGATCTATCGCACTAGCTCAGTTTCTAAAGAACGAGAATCGTTTAAAAAGAAACCT  
CCTTTGAAAGAGCAGTACGACTCCGTGATTCGGGAGTACTTCGACTTAGGTCATATGACACAAGTCTCTCC  
AAACAGCAACCCCAATAATTTTTACCTGCCGCATCATGCTGTTTTTAAGCCCGACAGCACCCACAACAAA  
GGTTCGCGTTGTGTTTAACGCCTCCAGCCCGTCTTCCAATGGCAAAAGTCTAAATGATATCCTACACACGG  
GACCAGTACTCCAATCCGATCTGACGATTCAGATACTAAAGTGGCGATTCTACCGCTACGTTTTCAATGCC  
GATATAACCAAGATGTATCGGCAAATCCAGGTGATCCAAGACATACGCCCTACCAACGAATACTATTTTC  
GCAATGAGAACGAAGAACTTTGCGACTTCGAACTCAATACAGTTACCTTTGGGGTAAACTGTGCCCCATA  
CCTCGCAATCCGGGTCTCCGTCAACTTGCTCGTGATATACGAGAACATTGTCCCATCGCATCCGATATAA  
TTGAAAATTATATGTATGTGATGTTCTAGCAGGGGCACACACGAAGCCACAAGCAATTTTCAGCCAT

TGCAGAACTCCGCATGGCACTCGACAGAGCTGGGTTCCCTCTGAGAAAGTGGACATCCAACACAAAGGAA  
GTGTTAAAAGGAATACCAAGGGACCACTTACTGTGTGCGGATTTCTTAGAAATCGAAGAGGCCAGCGTCG  
CTAAAACGCTAGGCATTCGATGGCAAGCCACAACAGACCAGTTTTTCTTTGCTCCGTCCAAAATGGTATCT  
CAGCCTTCGCTCACTAAACGTGAAGTACTATCACAGATTGCGAAATTGTTTCGATCCTGCTGGATGGCTAGC  
ACCTGTGATAGTTTCGAGCAAAGATTTTCATGCAAGAGATCTGGCTCCAAGAGCTGGGGTGGGATGATTCC  
CTGCCGGAAGATCTCGTTCAACGTTGGCATGACTTCCTAACCGACTATCCCTCTCTCGAAGAGATCCGTAT  
TCCAAGATGGGTTCGATTTTCAGCAAAAGGCAAAGGTGTCAGTTTCACGGCTTCTGCGACGCGTCCCAGCGC  
GCATATGGTGCTGCACTTTATTTGCGCGTCGAGATCAACGGATGCATCTCCACTCACCTTCTCGCAGCAAA  
AACGAGAGTCGCGCCAGTTAAGACGGTATCACTACCACGCTTAGAGCTGTGTGGCGCCGTCCTTCTTTCCG  
AGCTCACCACGGCTCTTATTCCTCAGCTCCCCATCCAGAGTAAAGAAAATTTCAATTGGACAGACTCCACT  
ATTGTTCTTGCTGGTTGGATAAACCTCCATGCAAATGGTCTACCTTTGTGGCTAACCGGGTAGCCAAGAT  
ATCATCAACCAATGGCAAATGGTCCCATGTTTCGATCCGAACATAACCCAGCTGACCTAGCTAGTCGGGGG  
TTTCTCCTCGGGACCTATTGGGCAGCACTTTGTGGTGGCATGGACCGGAATGGTTACAACCTACCACAAAAC  
CAATGGCCAGTTTCTGTACGGTACTTGAGACAGAGATTGAACAACGCGCAGTGAAGTGAATGTCTCAC  
AGCTACCCTCCTATAACCTTCTGGAACGATTCTCCAGATTTCGACAAGGCATTGCGAGTTATCGCATATGTC  
TGTCGCTTTATCCAGCGCTGTAGAAATCCAGCGATCCACTTTCCCGCCGAGCTCCGTAATGAAGAAGTTAC  
GAGAGTTCAGTTCCGACTTATCGAGTATACTCAACGCCAAGCTTATCCTAAGGAGTATAGCTGTTTGCTCG  
ATAAGAAGCCAATTCAAGGATCAAGCAGCATTCGCAATTTAACCCCTTTCATCGATCAAAGGGGTATTCT  
GCGATCCTGTGGACGGGTGAGAGCGTCAACCTCGTTAGGCTATGATGAGCGACACCCCATATCATTCCG  
GCCAATTGTGATTTTTCACGCCTCCTGGTCCGATTTACCCACCTCATTTGTTTTTCACGGAGGCAATCAGTTG  
GTAATGCGCCTCATAAGAGCCAAATACTGGATCCCAAAGCTCAAGGTCTGGTAAAATCTACCATAAACT  
CCTGCAAGGTCTGTGTAATACACCGTAGACGACTCCAGACCCAACTTATGGGCGAACTCCCAAGGGCGAG  
ATCAACCTTTTCCCGACCCTTCACACACACGGGTGTAGACTTTGCCGGACCTTTCGATATTAAGAGCTACA  
TTGGTTCGAGCATGCAAAATTACCAAGGGTTATGTCTGTGTCTTCGNTGTTTCAGCACGAAAGCAATCCAT  
TTAGAAGCCACCACAGATCTAACCACGGAGAGATTCTGGCCGCATTTTCGCGATTTATNGCAAGACGTG  
GCCTTCACAACAGATGTACTCAGATAATGGGAAAACATTTGTGGGAGCGTCATCCGTTCTTTTCGAGAGA  
TTTCTTGCAAGCGACCAAAGAGCTCATCTTATCCAAGCATAGCCATCAAAACTTGTGTTGGCATTTCATC  
CTCCTGGCGCTCCTCACATGGGCGGATTGTGGGAAGCAGGTGTCAAAAGCTTTAAGACCCACTTCTACAA  
GTCCACCGCATCCTCAAAATATACATTTGAGGAGTTCGCGACTCTCCTCTCCAAGATTGAAGCCTGCCTTA  
ACTCCAGGCCAATCTCTCCAATGTTCGGAAGATCCGACTGATTTATTGGCTCTAAGTCCAGGCCACTTCCTA  
GTTGGTGGCCCTCTTCTGTCAACTAACGAGCCAGTAATCAAAGAAGACGCTATTTCTATAATTAACCGCTG  
GCAGCGACTCAAAGCGCTCCACCAGCAATTTTGCTTACGGTGGGAAGAATGAGTATTTGAAAGAGCTCCAT  
AAGCGAAACAAATGGCAGTCCCCTACAAGGGACCTCCAAGTCGGTGATATGGTGATTATCAAGGAAGAT  
AACATACCAATAAATGAATGGCGCCTTGGCCGAGTCCAGCTGGCTTGCCAGGCACAGATGACAAGGTCC  
GCGTAGTGGACGTGCTTACCGCTCGTGGTGTTCATCCGAAGGCCAATAGCCAAATTGGTCCTTCTTCCTACT  
GAGGCAAATAGCACCACCGACTAATCCTTAAAAGCAACTAATCCCTCTTTCAAAACAAAATCATCACATA  
ATAACACCTGTCCTACATCTTATTCTCCAGTTCACTCCTCTGTAGAGAACCAGCATGGCACCGTCAACGAA  
GGCATCCAATCAACGTCAAGGAACGGACTCTTTTAGATGCCGGGTGTGTAGAGGCATCCATGCGCTACGC  
AAGTGTGACGCTTCTTGAAGCTCACGCCCCGAGAAGCGTCTCCGAGCCGTGTTAATTAACAAATATTGCTC  
CAACTGCCTGGCTCATCAGCATTTCAGGGGAATCATGCCGAGTGGAGCCAAGTGCAAAATTTGCAAAAAG  
GACCACCACACCTTACTCCACATGCGTGATCCCCGTAGCGCTCGACCCTCTCGGTGAGACAACAGGCCCA  
CAAGAAGAGCTTCTGGCTCCTCGCCCTCCAGCGGCACATCACCCCCAAGCCCGAGACGTGCTACTATACG  
GACGTCGCTTACGTCCCTTCTCCAGCACAAAGGGGGTCAGTATACTGCCACCGCCATAGTGCTGCTCGACA  
CCGGAAAAAGACCCTTGAGACTCGGGCTCTGATCGATCCATGTTGTTTCAGTAAGCCGCATTAATGCAACC  
GTGGCAAGGGCCTATGGCCTTTCCGTACACGCAATTGGCGCAGAAGGAGCGTGCACAGCCGTGCTACGCT  
CAAGACAACCTCAGATGTCTCGAGAAGTGGTCTTCATGGCTGACCCGCAACTCAGCTGCATAACTCCAGCC  
CGAGCCATCAGAGCGGACATGAAGGACCCGTTTCAGCAACGTCGCTTTGGCGGACAACGAATGGTTCCGTC  
CATCTCCAGTCCCTTTGGTACTCGGCGCCGACGTCTACCCAGACATCATCCTACCAGGTATCCTCCCGAGC  
CAAGGCGGTCTGCCGATGGCTCAAAATACCAAGTTTGGATGGATACTCTCTGGCACATGCACGCAATAGG  
AATTCTTGCAATCTGCATATTGCCAGGGGGGAGAATGTTTCATGCCAGTTCAGTGCTAGTGTGAACACAGC  
ATTGACTGAGCCTCACTCAGTGTGAGAGAGTCACTCAGTGAGACAGACTCACTCACTGAGAGAGACTCAC  
TCACTAATTCGATCCCAGATGCGCTCAGCACTCTCCTTGTGGTCTCCTTTCCACCTCCATCACTCCAACCAA  
AAATATGTAAAATCACTTAACCAGCAGAGTTTGTACATGCAGCAGAACTTCTAATAAAGTGCTTTTTCA  
CCAACAACAATCAAGGATTATTTATCTGACGCCACCCCCACAAACA

>160\_rnd-1\_family-300\_\_LTR\_\_Gypsy  
AAATAAAAATAAGTGAATAATAATAAAATTTTCTTTTATAAATAAAATTAATTAAACAAAAATAAATAAA  
AATGAGTGGATAATAATAAAATTAATAAAACCGAGGTTCAACAATAAAGATAAAGGCAGCGACCACATA  
AGGAACAGCCTAAAAGCGGAAAAGTGAGAAAAGAAAATTTTGAAATACCTTTTGTGAGTTTTTTTTTTTT  
AAAAAAGGGGGGTAAATACTTTTGTGGAATATTGTTTTGTATTTTGTGTTGGTGAAAGATATAAAGACGAA  
AAAGAAAAAAAAAAAAAAAAAGAAAAAAAAAAAAAAAAAACTAAAGAAGAAAACATAAAAGGAACCAAAGTGGC  
TGAGCAAGATCGGCGTAAAAGTGAAAAGACACCAACACCAAGAAAAGGAGAGAGGAATAGTAAAGGGA  
CCGACGGAACCCCTAGAACGGGAAGAGAGGGAAACAGCGACGTCTGACTAGCAAGGAAGTATACAATAA  
AGGATGGAGGCAGGTGAGTGCCAAAACCCGGGGGTAGGCGTCCGCTGGATTACCAGCGACGCAAAGAG  
GAGTTAGTGGCGATCGCCCAGGAGTTTGGGCTGGAAAAGGAGGGGGCGCGTGGAGGAGCTACGTAAGCGG  
CTGTCCACCTACGTGCAGGAGGGCGGTCAATTCGACTGGGATTTGGGCTCGGCTCGCCGAGCTGGAATCCC  
AGTATGCTAAAACTCTTGAGCCGCCATCTTGGGGCGTCCCACCCGACTTTGGTGAGCGGCCACGGCAAAA  
GTCGGAACCTGACCTCAGAAGCTCCCAGCTGTACGGGCTTTTGCAGGGCGCCACCCCGAGTTTGACCGTCT  
CGGGCGTGGAGGCAGTTCCTGCTCTCGGTGGAAATGAAGACCGCCGAGCAACTGCGGTCAACGCAGAGG  
TGGGGAGGTCCCCTGTTGAACCGGGTGGTGGTCCCTGCTACACTAGGCCGCACCATCCATCGGAGGGCGAG  
GCCACTTCCTAATGTCCCGGAGCAAGTTCGGAAGTGGGGTATGAGGTACGATGGACGCTCCGACCCCTT  
GGGTTCTTAGAGGACCTCGAGGAGCGCGCTATCACCTATGGTATAGCCCTCGACCGTATGCCCAGGGCAA  
TGAGCGAGGTATTCTGCGATAGGGCTGCTCGTTGGTTTCTGAGCAGTGGGCTAAGGGATGTGCCGTGGGC  
CGTGTTTAGGAGGGATTTCTTGAGTTTTTCTTGCCCCCTCGTTACTTCGAGAGGCTTGAGGACGAGATCC  
GATCCCGGAGGCAGCGCGTAGGTGAAGCGTTCAAGGAATATTTGATAGAGCTGAGGGCTCTTATGCACCA  
CGCTAGATACGAGCCGGCACAAAGAGCTGCATCGGATCTACGAGAACGCCGCTCCGGAATACAGGCTCTAT  
GTGCGACGGCAAGACTTTTCTACCCTATCCCAGCTAACTCAACTGGCCGTAGAATACGAGACCGTCGTGA  
GGCAGAGGGCGGAGTACTCAGGCAGCCAACCCGTGGNCCCGGGTGTCTCGAGTTCGAATAGTGCAGAGT  
GGGCGAGGACGGCGCAGTCCCCGAGGGGACATCTCAATCCGCTCCGGTCTGCTCCAGCGGATCCGGAAC  
GACCGTTGTGGACAACAGGGTCTCCGCCCCACCCGCTGCAACNCACGCAGAGGTGGCCCATCGGATGATG  
AGCCAAGAGGCGGGAACGGATATGATCCGCGACGCGCGTGTCTGAGGTGCGCACAGGAGGGGCACTTC  
GCCAGGGAATGTCCCAACGCCCCCGTCTTATTTTGTGTTGGGTATGTGGAAGCCGGGGCCGAAGTAGTCAGG  
ACCAGGATCGGGTCGGCGCCGATACACACGGAACGCAGTAGTAGGACACCCGCTGAAGGTGGACGGTGG  
CCGGATCGTTCGCTACGGTAGAGATCGGCGGACGAACGATGCCCGCCACGATCGATACTGGAGCCACTCGT  
AGCTTCATGAGTGAGGACTGCGTACGCAAGTGGACGATCCGGGGGAAGAGCGGAGGAAATACAGGCACGC  
ATCCGCCTGGCGGATGGGTCCACCCTAGAGGTGGAGAAGGCCTTGAGAGTAGACGTCAGCTTAGGGGGA  
AAAACGATCAGCATGACGATGCTCATCATGCCCTCAATGCTGGACCACGTAATCCTGGGTATGGATTTCTT  
GGGTGCGATGGGCACCACAATACGCTGCGGCGAGGGCGGAACTGGTCCTAGAAGCAGCGACGACACCGGG  
CGCGGGGCCAGGAACGAGCGAGGAGTCGGAGGAAGGCCTCCCAAGGCATGAAAAGGGAGCACCTGCTCG  
GCTACAGAGGGAGCCGGAGGAAGGCCTCCCAAGGCATGGAAAGGGAGCACCTGCTCGGCTACAGAGGGA  
GCCGGAGGAAGGCCTCCCAAGTCATGAAAAGGGAGCACCTGCTCGGCTACAGAGGGAGCCGGAGGAAGG  
CCTCCCAGGTCATGGAAAGGGAGCACCTGCTCGGCNNCCGACGGAAGAGGTCAGGAAAAGGGGAGTAAA  
GTCCGGCCCCGAATCGACAGCCTGGAGAACCCAAGAGGCGGCGCGTAGAGCTGCAGAGGCAGACTTCTGN  
TGGCTACGGAAGCGGCACGGCGGGAACGTGCCAGGGAAAGGAGGGAGTAGGAGCGATGGCCAGAATCC  
ACACGGACACAGGGGGCCAGGAGCGACTGCCAGAATCGAGCGGTCTGAGAGTTCTGTCTGGAGTCAAG  
TGGTGCCAGGAGGGGGCGANAACGGCATCGAAGAGGCGGAGTGGCCAGCGGATCTGGATCCAGAACTGA  
GGGAGTTCCTGGAGTCAGAGCTGGCTCTCTTCGAGGGGCTGCGGGGAGTCTCGCACATCGCGGAGCACCG  
AATCCGGCTGAGGGATGACAAGCCGTTGAAACAGAGGTACTACCCCAAGAATCCGGCCATGCAGAGGGT  
GATCGACGAGCAAGTGGATGAGCTGATCCGGGCAAATGCCATCGAGCCGTCGCGTAGTCCGCACAGCGCC  
CCGATCGTCTTGGTCAAGAAGAAGACTGGCGAGTGGCGTATGTGCATTGACTACCGACAACCAACGCGC  
ATTCCATTCCGGACGCTTATCCGGTGCCTCGTATTAACCACATCCTGGAGCGGTTGCGCCACGCCCGGTTT  
ATCTCCACTCTGGATTTGAAGCACGGGTACTGGCAGATACCGATGGCAGCCGATAGCCGGGAGTGTACGG  
CGTTCACAGTCCCTGGAAGAGGTCTTTTCCAATGGCGGGTGTATGCCATTTCGGCCTACACTCGGCGTGTGCG  
ACCTTCCAGCGAGCNTTGGATACGGTAATAGGGCCGGAATGGAGCCCCATGCGTTTCGCTTACCTAGACG  
ACATCGTGGTAATAGGAGCGACGAAAGAACAGCATGTAGAGAATTTGAGGGAGGTATTCCGCCGGCTAA  
GGGCGGCCAATCTCAGGTTAAATAGGAAAAAATGCAGCTTCTTCCGGGAGAGGTTAGTCTACCTAGGACA  
TGTAATTTGCGGGGAAGGGATACGGACCGATCCGGAGAAAGTGGAGGCGATACGNAACCTGAGGGCCCC  
GACAAATTGCAAAGAACTGCGGCAGTGTCTCGGGATGGCGTCATGGTACAGGCGCTTCGTNCCCAACTTC  
GCGACCCAGGTACAGCCACTCACAGCGCTCTTAAGAAGGGGCAGAAATGGGCATGGGAGCAAGAACAG

GAGGAGGCATTGCGTCAATTGAAGGANAGCTTGACGACTGCCCTGTGTTGGCTTGCCCCGACTTTTCCGC  
CAAGTTCGTCTTGACGACTGACGCGAGTGAGTATGGCCTCGGCGCAGTGCTGACGCAGACGATCGATGGA  
CAAGAGCGGGTGATAGCGTACGCGAGCCGAAAGTTGCTGAAGGCCGAGGTGAACTATTCCGCCACTGAG  
AAAGAGTGCTTGGAATCGTGTGGTCGATCCGGAAGTTGCGTTGCTACCTAGAAGGGTACCGGTTTCGACG  
TGATAACGGACCATCTAGCGCTCAAGTGGCTCAACTCGATCGAGAGCCCGTCAGGAAGGATCGCGCGATG  
GGCGTTGGAAGTGAACAGTTCCAATTTGACGTCCATTATCGNCGAGGGAAGCTCAACGTCTGTTGGCCGAT  
GCGCTATCGAGGCATCCTCTAGAGACCTGTCAGCAAGCAGTGGTGGCCGAGGCCCCCTGCAAATGGGTGCG  
CGAGTATGCGTGCTAGAATCGCCGAAGAGCCAGCCAAGTTCCCGGATTACACCGAGGAAAACGGACAGC  
TATATAGGCATTTGGGTACCCGGATAGACGATGAGGACTACATCCCCTGGAAACTATGCGTAGGCAGTGG  
TCAACGCCAGAGGGTACTGNGGGAATGTCATGATGCTCCACGGCCGGACATCAAGGTGTCAGGAAAAC  
GGTGTGCGAGGTTAGCCCAGCGGTACTACTGGCCGGGTATGTTCCGCGATGCCGCCAGATACGTGAAATGT  
TGCGAAGACTGCCAAAAATTCAAGAGCGAGCAACTCAAACCGGCTGGTTCGATGCTGACGAGGCAGGTG  
GCAGAGCCGATGGCGGTACTTTGCGCGGACTTCGTCGGACCCCTTCCACGGTCGAAACATGGAAACACGA  
TGCTACTGGTGTTCATGACGCTTTCTCGAAGTGGGTGGAGTTGGTCCCTCTCAGGAGAGCCACGGCAGCA  
CACCTGCAAACCTGCGTTTCGAGAGAGGATTCTAAGTAGGTTTCGGGGTACCTAGAAAGTTTGTGTGCGACA  
ACGGGGTACAATTTACGAGCCGGAGCTTCAAGTCGTTTTTGGGGTCCCTGGGTGTAGAGATCCAGTATAC  
CGCCCCGTACTGTCCGCAAGAGAATCCCCTGAGAGGACCAACCGGACTGTAAAGACCATGATAGCGCA  
ATTTATTGAGGGCCACCAGAGTTCATGGGACGAACTCTTGCCCGAGATCTCGCTGGCGGTCAACACGAGC  
GTGGCAGATTCAACGGGCTTTAGTCCCGCTTTCCTGATGCAGGGCAGGGAACCTCGGTTACCCGCAGCTCT  
GTACGATCAGGTGACTCCGGGGTCCGCAACTAGTGCGCTCGACCCTAGGACAAAGGCGGATAGGCTAAA  
AGAAAATTTTTGATATCGTCCACAGCAACCTCCAGCGCGCATCAAAGGACCAGGGCAGGCATTACAACCTT  
GCGGAGACGAGAGTGGCGGCCTTCGTTGGACTCGATGGTCCTGTTGAGGCAGCACCAGTTGTCCAACGCC  
GCCGAAGGTTTCGCCGCAAAGTTGGCACCCAAATTTGACCGGCCCTACAGGGTCGTCAAATTCATATCC  
CCCAATATTGTGCGGCTGGTGAAATCAGGCGANCGCAAGAAGAGGGGTGGCCAACATCTCACAGTTGAAA  
CCATTCTACCGAAAGACGACGAGCGACGAAGAAGACGAAGATCCAGGGCACGCAAATGCCACGAGTAG  
GCGAAGGATGAGAGCGACACCCGTCGCCCAACGAAACCATTATGATTAAGCTTAGATAAGACTAACACTA  
ACAACATAATTCAGAATAGGCNTAGTAAAGTGTGAGCCGCACTGAGAGGATAGGGCATTAAACAAATAAG  
TAANGAGTAAGTTAACCAATAAGCTGAACTTTCAGATGGAACCCGAAGTTATCGACATATCGTCAGACGA  
AGACAACAGCAGCGGGGACACCGAGCCTTTCCCCGGGCGGGAGCCGCGAGGCCGTCCGCGCGACCCACG  
CCAGGGGGCGTGAGTACTATCGAAGAGAACGGCAAGAAGGACCGCCTCGCCAGTTCCGCCATACACTATTC  
TCCCGGCGGACCAGCATAATGGAGAGGCTAGACGGGATGGTCTTGCTGATGGCAGTCGAGGTCACGACA  
ATGTTTCGTGGAGGCACCATTCGCCCGGAACTCGCCACCGTACGCGGAAGAGCCTGCATCTCCGCCCTCG  
CATCCCCTCGGCACAATCATCAGAGCCGGCAACCCCAACCGCGGCCGGCGAGATGGACGAGGAAGAGT  
CCGCACCGTTTCGGAACGGAGGAGCACACACCACCAGCGCAGGACGTGGAGGCGGTAGGAGAAGAGATAT  
CCCCGTCGGCCGGAGACGCGGAGTCGCCACCGACGGAGGTGCCGAACGGCATCCGCGCAAACGACGGGG  
AAGCAGACCCGCTGAGCCTCGACCCAGAACCCTTAGTGGGAGGGGACCCGTCAACGGAGGACGAGCCGG  
AATTCGTCGCCGCTTTGCCACCCACCGTCTGGAGGTAGACCCGGGACGCCAGTTTCCCAGGATAACGCT  
GCGGTACCTACCAAAGTCCCCGCGGTAGCCAACAAACCCCGTCTGAACCCCGCAAAGCGCGAATGGGG  
GGGTGCCGAAGAAGGCCCGGGCGGAAAGCGCCGACGCAGCCGCCATCGTCGACGGAGAGCCGCCAGGGG  
CGAGCGTCGCCGGAGTGGAGGCCATCGCCGACCCAGTCCCAGGGGAGCATCCTCGTCGGCCACGAAGAG  
GCTTCGCACGGAGACCGAGAAGCCCGAAGGATCGCAGCGGTGCGTGCCGCGTTCCGCCCGCGAGCGCCA  
GGAGGGTCTCTCCCAGCTCGGGAAGGATAACCGCCGCTGCNAGATCGCTTCTCGAGGAGGGGCATCCCGAA  
CCCTGGCCGATACCGATTGCGGTCTGCCAGATGGTCGTGGAGGAGCACNATCTCAGCACCAAGGACGCGG  
CGAACTCGGCCGTTTCCACAGCCCGCGCCGAGGCGCCAGACGAAACCTTTCTAAGGAATCGGAGGAGGA  
GTGGCTCGACGACGAGGACGAGATGCCCGCGCTCGTGCTATTGCCCCGCGCCGAGACACCCGACACCATC  
GCCCGGCGGGAGTTAGAAGACGCCTGGTTTCGGCCAAGAAGGCAAGGCGCCATCCCGAAAAGGTTTCCTTC  
ACGGTTCGCCAGGAAGGCCCGGGATGAAGTCTGGTCCGAGGAAGAGGACGCGGTGGTGACGGCTTCGTGCG  
CCCAAGCTTTTCGAGTCCAACCCAGGATTCCTCCCCCATGGCTCTAAAGACTCCCACGGAGAGCGAGTTGT  
GGGACGACATAGTGGACCTTTTCGACGGCATCGACGGGTGGGACACTAGCCTGGACTCAGTGCTGGAGGA  
GGAACCCGACACCGAGGTCGACACGGTCGCCCCGACGTGCCGACGTGAGGGTACACCGGAGAGCCACCC  
CAAGAAACCCGACACCGAGGTCGAGGCGATCGCCACAGTGCTGACGTTGGGGTAAAACCGGAGGGGCC  
CGTCGAGGAACCCGTGCCGATTCCACCCCTCAGGCTGGAAGGTGTTTCTCTTGGAACACCGTTGTGCTG  
CGGGCGTGGTGGACCTAATCGCCAGAGAGGCGCGAATCCGCCGCTTCCGGTGCCGACGTACTCGGTTCCA  
CGTGTCCGACGGGGAGAGCGAGTACAGCGTTACGCTGAACGCGAAAGGCGACGTGACCGTCACCTGTCC

GAAGTGAGGGGGGGGTGTGAGGCGGCTAATGAGACCAGCCACCCACAGTTTTTCACGGCAAGGAGCCGT  
CATCCCTTTGGCCAAATTACGGCAAGGAGCCGCTGGCGGGACAACGTATTAATTTTCTTTAGTTATAAGTA  
TTAATTATATTAGGTAAAGATCTTAGTGAAATAAGAGGCAAGGAGCCATCAGTAATATAAGCAGTTTCGAT  
TAGTAGCAAAGAGGCAAGGAGCCGCGAATATTATAATTGATTTAAATAGTGAGTTTGAATTTAACCGCCG  
GCCGCCGCTGCAACCGTGCGTTGTCGATCGGTTGCTCAACACCGTCTTTGAGAGCGCAACTTCAATTCGGC  
GGCGAAGAGCGAAAGCTCCGAGGCGAAGTTGCGAAAGCTCGCGGCGAAGTTGAGCAGCCGAAGCGAGCG  
CATGGCTTGCCGGCGAGCGTGCCGGCACTTGTGATCGAACGTTAAGGGTGAGTAGAAGTGCTGCGCGAGA  
TAAACGAAATCATAGATGGTATAGTGAGCGCTAGGGCTCCAGAAAACAGTGCGGCAGGGTTTAGCTTAG  
GATTTACGATAAGGTCGGAATGAATAATAGTGAATAAAGTGCCAACGTTGTAATTATCTAGAAAGTATTG  
GATTATTCCTGTTCCTGGTAACCCGGCTTACCTTAACATCGGAACTAACCGGTGTTTCGACCTAACCTCG  
AACGAGGGGCATGCGATACGAGATTGTGGCTCCGGGGTGGGCATTGCCGGTTGGTGTTTAGGTAGTGGAG  
TTGGTGCGAGGCCACGGCCCGCTAGTGTAGTTGGTGCGAGGCCACGGCCCGCTAGCGTAGTTGGTGCGAG  
GCCACGGCCCGCTAGCGTAGTGGTGCGAGGCCACGGCCCGCTAGTGTAGTTGGTGCGAGGCCACGGCCCG  
CTAGCGTAGTGGTACGAGGCCACGGCCCG

>9\_rnd-1\_family-236\_\_LTR\_\_Pao  
TGTTGCGGGACGAATTAATTTATCGATTGTTTAGTATTAAGTATATTCTGAAAGTATGTATATTTGCCCTCC  
GAATGTACGGGCACACTGTATTTGGCTTGTTGCCGCCATTACTTAAATGTTAAGCTCATTATTGTCGTGAG  
TTCGAAGGCCGTAGGAGGAAAGACTGCGGTAAGATTCCGAGGGAATATATATCTAAGTTCTAACCTATGT  
AATCCGTTTAGAATAAAACACTTGCACTAGCACGTTTTTGATTACGCTGTCTCTAGTAACATCGGAGTAAC  
ATGGCCGGGGGCCAGGCGTAAACTTGCAAGTGTTCAAATTGCAACTCCACCTTCATTTGGCACGCGACATG  
ATCTTTTATTCGCAGTTCTTATTGTAAGAACTGCAAGGGCGACTTGCGCTGAAGACAAGACGTGGTGTA  
CATTGGTGTACAGTGTGTGTACATAGACACAGCACAGGCAGGGCCTCCACCCAGTTATAGAGTCACCAT  
TAGTACGCAGCCAGCGTAAAATATAGCAGAAACCATCTCCGAGCTGAGTAGGATGACACAACGGTCACCC  
AGGAAAAGCCACGCTTAAACGATGGCCAGGAGATAGCTACCACGGCGAGTGGGACGCAGACAAAGCGG  
ACAAGTAGAATGGTGAGCACTGTATCACAATGCAAGTTCCCGCTGTTAGCGCACCACAAAGCCCCAGCA  
CCGTGGATGCGGGCACAAGTGTACAACCTGCCGGCACTGTGGCCGCGGGAGTGAGTGCACGAGCCAGCA  
CATTGACAGGAGCGCCAAGCCCAAGCACGCAACTCTCAAGTACGCAAGTCATGGATTTGATAAAGAGAGT  
CGCTGTGCTAGAGCACGAGTTGCAGAGGTCAAAAACCTGGTCAAGCACATGTGAGTACAGTTACTGATCCC  
GTTAAGTTGAGTAGTGCTGGCATGAGTGGTACAGCTAACCTGCCGCCATCTTTGATCGGAGCGGAGAGCG  
GAGAGCCATCGTCGAGTGGAAGTTTGAGTGAACTGCAACTATGAGTGTAGTCCCAAATTCAAAAGTAAG  
TTTGAGTGAACTGCAATTTTGAGTGGAACCTACCATTTTGAGCAGATCGCCATCTTTGAGTGAGGCACTGC  
CTACGTCATTGAGTGGAATTTGGGAACACAGTTGCAAACGGTAGAACGGGCTACAGTTATGGATAACTG  
CTCTACAACGTCAAGCCGCTCGACGCCATATTGCTTTGCAGGCATTGCACAGCCAACGCTCAGCTACACTC  
CGGCACAGGAGAACCAACAAACGATAATTTTGAGGCCAACGCAGGCAACTGGGAACCTTCGCATGGACGA  
CTCCAGGAACGATGTATGCCTGCCACGCAAATTACCAGATCTACCCGAGTTTGAGAGTCAACCTGAGGA  
TTGGCCTATATTCTTCTGCGCGTTTACGGAAACAACTTTGGCGTACAACGTGACAAATCTGGAGAATAACC  
AGCGATTGTTGAAGGCACTCAAAGGCGAAGCACGTGACACTGTGAAGTCGTTGCTCATACATCCCAGGAA  
TGTGAACAACGTAATTGAACAATTACGTTTTAGATACGGCCGCCAGAACAGCTAATACGCAGCCAGCTA  
ATTAGTATTCGAGAGGTGCAGCCAATTCAGGAGCACAGCATAGCTAAAATCGTGCCATATGCTACACGCG  
TAAGTAACCTTGCCGCCTTTCTACAATCGGCTAACGGGGAACAGCATTTAGCGAATCCTACACTGATGGA  
GGATTTGGTTCGCTAAACTACCACCAAGCAAGAGGGTGGAATGGGCCAGACATGCAGCTACGATTAGGCCT  
TTCCCGACGGTCGTACATTTTAGCGCGTGGTTAACGGACTACGCCAATGTGGTATGTACGATTGTGGACGT  
CGATAGTAAGGAGCAAAGGCGTAGAGTGCTGCATGCCAGCATTGACCAGAATAATGAAGGGCGTCACCG  
AGGTCGCACCAAACAGTGTCCAATCTGTAATGGACAACACGCAGTCAGGGACTGCAACGAGTTTAACTTA  
GCCTCTCCGCTAAAGAGGTGGACAGTCGTAAAAAGGCACCGGCTTTGTTTTTCGTGTTTACGAGTTGGCCA  
CATGGCAAGAGTCTGCAATAGGGCCAACGAATGCCAAGTTAATGGATGCCGGAAGAGACATCATCGACT  
CTTACATTATCATGATGCTATGAGTCACAATGCACCGCAACCAGCAGGTGATAGAGTGATGAATACTGGA  
CGGATGCCGCAGCCAGCGGATCCTCACACAAGGGCACCGCAGCCAGCGGATGCTCAATCGACGCAACAA  
AGGAACCTTAAGTTGTGTGCGATTTCGGATGGAGAACGCCTACTATTCCGCATATTGCCAGTGACATTGCACG  
GGGCAATAAGCGGATCGATACGTACGCGCTCCTCGACGAGGGCTCGTCTGTAACGATGATCGACGACGA  
ACTACTGCGCGATCTAGATATCAAAGGGGAACGCAGGCAACTAAATATACAGTGGTTTGGTGGAAGAGC  
AACCAGAGAGCCGACCACAGTGGTAAGCATGGAAGTTAGTGAGCGGACAAGCGCAAACGGCATGTGTT  
GCGAAATGTGTACGCCGTGTCCAACCTCAGCTTACCAATGCAAAGCCTGCATCAACGTGACGTCCAATG  
TGGGGCAACGGTGCACGTCTTCCAATGAAACCGTATCGCGGGGCGGTACCAAACTTCTGATTGGACTTG



ACCATGCGCATCTTGGACTGCCAATGCAAACAAAAAGGTTTGCACCACAGGGACCATATGCCGCAGCCAC  
CGAACTTGGATGGGTGGTTTTTTGGGCGGGCAAGAGATCAACCGACGGCAACGTCATCAAAGTCATGCCTC  
CTAGCAGTGTTCGAGGAGGATGCAATCCAAAAGATGGTAAACGACTATTTTGATATCGAAAACCTTCGGNG  
TGAAGCTTACGCCACCAGTCGCAGCCAGCGACGATGCACGAGCACAGAGGATACTCGAAGACACCACGG  
TGAAAATAGGAGAACGTTACCAGACGGGTTTATTATGGAACCGTGATAATGTTGAGTTGCCACGAAGCTA  
TGATATGGCATAACAAAAGATTGGTCAACATTGAGAGAAAAGATGAAGCGTAACGATCAGTTTAAACAAGC  
CTATATGAAAATTATGGACGATTATGTTACAAAAGGATATGCTCGACGATTGAAGCAGCATGAGGTGCT  
TTAGCCAACAGCGACAAACTTTGGTATCTTCCGCACTTTGGAGTTGAAAATCCAAATAAGCCCGGTAAGA  
TAAGACTGGTGTTCGACGCGGCAGCAAAGGTTGGTGATATTTCAATTGAATTCGGCATTATCCAAGGGGCC  
GCAGCACTATAAGTCGCTGCCGGCTGTTCTCTTCCATTTTCGGGAAGGTGCCGTTGGCGTTTGTGGAGACA  
TCCGAGAGATGTTCCATCAAGTGTTGATTCGACCGCAGGACAGATGCGCCCAGCGATTCCCTGTGGCGAAA  
CGGCGATGATCGCCGGGAGCCTGATGTTTATGAGATGAGGGTAATGACGTTTGGAGCAGCATGTTTCGCCA  
AGCGCCGCACACTATGTGAAGACCTTGAATGCCCTGCAGTTTCAGGATTCAGACCCTCGCGCGGTTAAAG  
CTATTCTTGAATGCCACTATGTGGACGACTATGTGGATAGTTTTGATAGTGAAGGCGAAGCCATCACCATA  
TCGACAAGAATAAGAGAAATACATGCAAATGCTGGATTTCGAATTGTGCCAGTTTACTTCCAGTTCGCCAA  
CTGTAGCTGACGCGCTGGGCCAACATGGGGCTGCGAGGAGCATCGGATGGGGCGAAGCTGAAGAAAAGA  
TTCTAGGCATGTGTTGGCAACCAGCCACGGACGATTTCAAATTCAACATGAAGTACCACAAAGTACCCCG  
ATGTGTGCTAAATTTGGAGCGAATTCCTACGAAGAGGGGAATTCCTGAGCTTGATCATGTCAACATTCGATC  
CTCTGGGATTTCTTAGCTGCCTCATGATAACTGGAAAGTTACTAATGCGTGAGATTTGGCGACGAAATGTG  
CAATGGGATGAACCTTACCAGATGAGATCGCCCGGGCCTTTAGCAAATGGCTTCAGGATATGAACAACG  
TGGAAGGATTTTCGGAGCTCGCGCCATTACTTCGGCCCCAACACCTGTGCGGGCAATACAGCTGCACGTTTTT  
GTCGATGCTAGCCAGTCAGCATTCGCAGCCGTGACTTACTTGAGGGTCACCTACGACAACAACGACGTGC  
GAGTATGCTTCGTATGTGCCAGGACGAAGTGTGCCCCAATGAAGACGATGTCAATTCCACGACTGGAATT  
GCAAGCAGCCGTGTTAGGAACGAGGCTGATGGACACTGTCAAAAAGGAGCACAGTATAGCGATCAGCGA  
CGCTATACTATGGACTGACTCCAAAACNGTGCTGCGTTGGATAGGCAGCACCCACCGTCGATATAAGCAG  
TTCGTCGGAAATCGAGTGGGAGAAATTTTGGAGTCAACAAAGGTTTCCCAATGGAGATGGGTACCTACTG  
CTGAAAATGCAGCAGACGACGCAACGAGGCCGCATTGCCACGTAGACCTCAGCCAACGGTCACGATGGTT  
AGACGGGCCAACATTTTTGCGGCAGCCGGAAAGCAGCTGGCCGCAGTCCGAACCGGGCACGGAACACTC  
ATCCTACGAAGATGAAGAAGAGATGCCGAGTGAATTTGCCTTAGTTGCAGCAAATAACTTTTTTCATTTTCAT  
TTCAGAGATTCTCTAGCTACAGTCGGCTGGTGAGGACGACGGCTTGGGTTTTAAGGTTTCACGCGCTGGAG  
CCGTGGACAGAGGACTGAGCTTGAGAGATTCGGCCTCACCGCGACGGAGTGTGAGAACGCTGAGAACTT  
GCTGATACGGCGAGCGCAATGCGAAGCGTTCCCTGACGAGGTTTCGAGCCTCATAAATGAAGAATCAGTC  
GGTCATCGAAGCGACATAAGAGGGCTGGCGCCNTACTTGGATGACAATGGAGTCTTGCGTGCGTATGGCA  
GGATCGATGCCGCACTGTGTATACCGCATAGTGCGAGAAGGCCAATAATCTTGTCACACCGGCACGCACT  
GACGGAAGTATTGTGTATCACTACCATGTGAAAATGAAGCATCAAAACGTGGATGCAACGATAGGCGAC  
ATCAGGACCAGATTTTGGATAACAAAGCTGCGTCGACTGTTGCGTACAGTAATATCTGGATGTAGTGTGT  
GCAAACACTACATAGAGCGCAGCCAGCGCCACCTATAATGGGTCCCTTTGCCAGAGGACAGACTGGAGGCCA  
ATGGATGGCCATTTAAGTTTACGGGTCTGGACTATTTTGGACCACTCCTTGTGACGATCGGACGTCGAAAG  
GAAAAGAGATGGGTGCGCTTGCTTACGTGTCTGACAACAAGGGCCATACATTTGGAGCTGGCACATGACC  
TGTCAACTGATTCCTGCATAATCGTGATCGGGAACCTTTCTTTGCCGTCGCGGACCTGTACTGAGGTTGCGC  
AGTGACAACGGAAAGAACTTTGTTGGGGCCGACAGAGAAGCCAAAAGGCTNATAGATGTATTCGAGCCG  
GAGAAGATTACAGGTGAGCTATTTCTAGAGGCATTGAATGGATCTTCAACTGCCAGCGAACCAGCTGA  
AGGGGGAGCCTGGGAAAGGATGGTGCAGTGTGTCAAGAGAGTGCTACGCCACACAGTAAAGGAGGTGGC  
ACCAAAGCAACACGTAAGTGGAGAGTTTCTGATTGAGGCGGAGAACGTTGTGAATTCTCGCCCGCTTACC  
CACTTGCCGGTGTCTGTGGACCAGGAAGCCCCCTAACACCGAACGATCTACTCAAAGGAGTGGCCAATCT  
GCCTGACACGCCCCGCTATCCACGAGCAGCCGAACGAGAGACGCGCCACGAGGAAGCAGTGGCGCATGGC  
GCGGCTGTTACGAGACCGTTTTTTGGAAGCGGTGGGTCTTAGAGTACCTGCCTGCGCGCGTTGAGCCGATA  
CGCCATGGTGATATGGTGTTTATATGCGACCCGGCCGTGCCACGCAGAGAGTGGCGAAGGGGCATAGTGG  
AGGAGCTCTACCCTGGACCAGATGGAGTGCCTCGACGCGCCAGCGTCCGCGTGGCGGACAACAATCGAGT  
GCGACTGATGACTCGTCCTCGTGCTAAACTAGCCATACTGGATGTGAGTGAAGCAGGGCCCTTCACGGGG  
GCGGGGATGTTGCGGGACGAATTAAGTTATCGATTGTTTAGTATTAAGTATATTCTGAAAGTATGTATATT  
TGCCCTCCGAATGTACGGGCACACTGTATTTGGCTTGTTGCCGCCATTACTTAAATGTTAAGCTCATTATTG  
TCGTGAGTTCGAAGGCCGTAGGAGGAAAGACTGCGGTAAAGATTCCGAGGGAATATATATCTAAGTTCTAA  
CCTATGTAATCCGTTTAGAATAAAACACTTGCACTAGCACGTTTTGCATTACGCTGTCTCTATTAACATCG

GAGTAACATGGCCGGGGCCAGGCGTAAACTTGCAGTGTTCAAATTGCAACTCCACCTTCGTTTGGCACGC  
GACACTTAGTAAAACCTTTATCTCCCCTGAATAAAATTATGTCCTTAGTTTTAAGTCATATAGCTCTTTATTT  
TTTTGTTTGCAGTAGTTCAAGCATATTTTTTGGCTCTTTGGTATGCTACTTCTAATCAATACTTACTTTCTTTAG  
CGAAATCTTCTATGTTCTATTTAGGTTCTATATTACCTATGGTATCTAGTATTTTCGGCAGATTACTAGTCTT  
ACCAAACTAAGTCATATGGACAATAATTATGTGCCACATNTATGATTTATGAGGATGCCATGAGTCACA  
ATGCACCGCATCAAGCAGGTGATACAGTGATGAGTACTGGACGGATGCCGCAGCCAGCGGATCNTCACAC  
AANGGCACCGCAGTCAGNNGATGCTCAATTGACTCAATTGACAAAGGAAGTTAAGTTGTGTGCGATTTCGGA  
TAGGGAACNCCGACTTTTTTCCGCATATTGCCAGTGACGTTGCACGGGGCCAATAAGCTGACCGATACGTA  
CGCGCTCCTTGACGGTGACAAACGCAAGCGTCATGTATTGCGAAATGTGTACGCTGTGTCCAACCTGAGC  
TTACCAATGNAAAGCCTGCATCGACGTCAAGTCCAAATGTCGGGCAACGGCGCACGACTTCCAATGAAAC  
CGTATCGCGGTGCGGAACCAAACTTCTGATTGGACTTGACCACGCACANCTTGAAGTCCAATGCAAAC  
AAAAATATTNGCACCACAGGGACCATATGCCGCAGCCTCCGAAGTTGGATGGGTGGTTTTGGACTGGTAA  
GAAGTCAACCGACGGCAACGTCATCAAAAACATGCCTCCTAGCAGTGTGCGCAGGAGGATGCAATCCAAA  
AGATGGTAAACGACTATTTTGATATCGAAAACCTCGCCACCAGTCGAAGCCAGCGACGATGCACGAGCAC  
AGAAGGTACTCGAAGACACCATGGTGAAAATAGGGAAACGTTACCAGACAGGTTTATTATGGAACCGTG  
ATAATGTTAAGTTGCCACGAAGCTATGATATGGAATACAAAAGGTTTCGTCAACATTGAGAGAAAGAGAA  
AGCGTAACGATCGGTTTAAACAAGCCTAAATGAAAATTATGGACGTTTATGTTTCATAAAGGATATGCTCG  
ACGATTGAAGCAGCATAAGGTCGCTTTAGCCAACACGACAAACTTTGGTATCTTCCGCACTTTTGAGTTAA  
AAGTCCAAATAAGCCCGGTAAGATAAGACTGGTGTTTCGACTCAGCATTGATCATGTCAACATTCGATCCT  
CTGGGATTTCTTAGCCGCCTCATGATAACTGGAAAGTTATTAATGCCTGAGATTTGAAGACGAAATGTGCA  
ACGGGATGAACCTACCATATGAGATCGCCCCGGGCGCAAATAACTCTNTCATTTCATTTCAGAGATAATAA  
TAATAATAATTTTGAGTGTTAACGTTGAGCTCAAAATTTAATTCTCCTAAAATTATTAAAATAATCGTTTA  
ACAACCGTCCCTATTGGCTAGAAGCACGCGTTCTCACCAACTCGTTTCGCCCGCGCGTACGTGCGCAATTAA  
GAATAACGTAGACAAACAAATAANTTACAAGAAAATAACCGAGTCTTGATTGATACTGGGTAGCTGGGTA  
ACGTTACGCCCCAGGACCCCCCTTTTTTCCATCACGATGGACTGGCAAACCTTCGCCTGATAATATTGGC  
GA

>9\_rnd-1\_family-417\_\_Unknown

CTGAGTGAGGCTCAGTCAATGCTATGTTACACTAGCACCGAACTGGCATGAACATTCTCCCCCTGGCAAT  
ATGCAGATTGCAAGAATTCCTATTGCGTGATGTGCCAGAGAGTATCCATCCAAACTTGGTATTTTGAGCC  
ATCGGCAGACCGCCTTGCTCGGGAGGTTACCTGGTAGGATGNTGTCTGGGTAGACGTCGGCGCCGAGTA  
CCAAAGGGACTGGAGATGGACGGAACCATTCGTTGTCCGCCAAAGCGACGTTGCTGAACGGGTCCTTCAT  
GTCCGCTCTGATGGCTCGGGCTGGAGTTATGCAGCTGAGTTGCGGGTCAGCCACGAACCACTTCTCGAGA  
CATCTGAGTTGTCTTGGGCGTAGCACGGCTGTGCACGCTCCTTCTGCGCCAATGCGTGTGACGGAAAGGCC  
ATAGGCCCTTGCCACGGTTGCATTAATGCGGCTTACTGAACAACATGGATCGATCAGAGCCCGAGTCTCA  
AGGGTCTTTTTCCGGTGTCGAGCAGCACTATGGCGGTGGGCAATATACCGACCCCCCTTGTGCTGGAGAAG  
GGACGTAAGCGACGTCCGTATAGTAGCACGTNTCGGGCTTGGGGGTGATGTGCCGCTGGAGGGCGAGGA  
GCCAGAAGCTCTTCTTGTGGGCCTGTTGTCTGACCGAGAGGGTTCGAGCGCTACGGGGATCACGCATGTGG  
AGTAAGGTGTGGTGGTCCTTTTTGCAAATTTGCACTTGGCTCCACTGCGGCATGATTCCCCTGAATGCTG  
ATGAGCCAGGCAGTTGGAGCAATATTTGTTAATTAACACGGCTCGGGGACGCTTCTCGGGCGTGAGCTTC  
AAGAAGCGCTGACACTTGCGTAGCGCATGGATGCCTCTACACACCCGGCATCTAAAAAGAGTCCGTTCT  
TGACGTTGATTGGATGCCTTCGTTGACGGTGCCATGCTGGTTCTCTACAGAGGAGTGAAGTGGAGAATAA  
GATGTAGGACAGGTGTTATTATGTGATGATTTTGTGTTTGAAGAGGGATTAGTTGCTTTTAAGGATTAGTC  
GGTGGTGCTATTTGCCTCAGTAGGAAGAAGGACCAATTTGGCTATTGGCCTTCGGATGACACCACGAGCG  
GTAAGCACGTCCACTACGCGGACCTTGTGATCTGTGCCTGGGCAAGCCAGCTGGACTCGGCCAAGGCGCC  
ATTCATTTATTGGTATGTTATCTTCCTTGATAATCACCATATCACCGACTTGGAGGTCCCTTGTAGGGGACT  
GCCATTTGTTTCGCTTATGGAGCTCTTCAAATACTCATTCTTCCACCGTAAGCAAAATTGCTGGTGGAGC  
GCTTTGAGTCGCTGCCAGCGGTTAATTATAGAAATAGCGTCTTCTTTGATTACTGGCTCGTTAGTTGACAG  
AAGAGGGCCACCAACTAGGAAGTGGCCTGGACTAAGAGCCAATAAATCAGTCGGATCTTCCGACATTGG  
AGAGATTGGCCTGGAGTTAAGGCAGGCTTCAATCTTGGAGAGGAGAGTCGCGAACTCCTCAGATGTATAT  
TTTGAGGATGCGGTGGACTTGTAGAAGTGGGTCTTAAAGCTTTTGACACCTGCTTCCCACAATCCGCCCAT  
GTGAGGAGCGCCAGGAGGATTGAAATGCCAACACAAGTTTTGATGGCTATGCTTGGATAAGATGAGCTCT  
TTGGTCGCTTGCAAGAAATCTCTCGAAAGAACGGATGACGCTCCCACAAATGTTTTCCCATATCTGAGTA  
CATCTGTTGTGAAGGCCACGTCTTGCGATAAATCGCGAAAATGCGGCCAGGAATCTCTCCGTGGTTAGA  
TCTGTGGTGGCTTCTAAATGGATTGCTTTCGTGCTGAAACACACGAAGACACAGACATAACCCTTGGTAAT

TTTGCATGCTCTACCAATGTAGCTTTTAATATCGAAAGGTCCGGCAAAGTCTACACCCGTATGTGTGAAGG  
GTCGGGAAAAGGTTGATCTCGCCCTTGGGAGTTCGCCCATAAAGTTGGGTCTGGAGTCGTCTACGGTGTATT  
ACACAGACCTTGCAGGAGTTTATGGTAGATTTTACCAGGACCTTGAGCTTTGGGATCCAGTATTTGGCTCT  
TATGAGGCGCATTACCAACTGATTGCCTCCGTGAAAACAAATGAGGTGGGTAAATCGGACCAGGAGGCGT  
GAAAAATCACAATTGGCCGGAATGATTATGGGGTGTGCTCATCATAGCCTAACGAGGTTGACGCTCTCA  
CCCGTCCACAGGATCGCAGAATACCCCTTTGATCGATGAAAGGGGTAAATTGCGAATGCTGCTTGATCCT  
TGAATTGGCTTCTTATCGAGCAAACAGCTATACTCCTTAGGATAAGCTTGGCGTTGAGTATACTCGATAAG  
TCGGAAGTGAAGTCTCGTAAGTTCTTCATTACGGAGCTCGGCGGGAAAGTGGATCGCTGGATTTCTACAGC  
GCTGGATAAAGCGACAGACATATGCAATAACTCGCAATGCCTTGTCGAATCTGGAGAATCGTTCCAGAAG  
GTTATAGGAGGGTAGCTGTGAGACATTGCACTTCACTGCGCGTTGTTCAATCTCTGTCTCAAGTACCGTAA  
CAGGAAGTGGCCATTGGTTTTGTGGTAGTTGTAACCATTCGGTCCATGCCACCACAAAGTGCTGCCCAAT  
AGGTCCCGAGGAGAAACCCCGACTAGCTAGGTCAGCTGGGTTATGTTCCGATCGAACATGGGACCATT  
GCCATTGGTTGATGATATCTTGGCTACCCGGTTAGCCACAAAGGTAGACCATTGTCATGGAGGTTTATCCA  
ACCAGGCAAGAACAATAGTGGAGTCTGTCCAATTGAAATTTTCTTTACTCTGGATGGGGAGCTGAGGAAT  
AAGAGCCGTGGTGAGCTCGGAAAGAAGGACGGCGCCACACAGCTCTAAGCGTGGTAGTGATACCGTCTT  
AACTGGCGCGACTCTCGTTTTTGTCTGCGAGAAGGTGAGTGGAGATGCATCCGTTGATCTCGACGCGCAA  
TAAAGTGCAGCACCATATGCGCGCTGGGACGCGTCGCAGAAGCCGTGAAACTGCACCTTTGCCTTTTGTCT  
GAAAATCGACCCATCTTGAATACGGATCTCTTCGAGAGAGGGATAGTCGGTTAGGAAGTCATGCCAACG  
TTGAACGAGATCTTCCGGCAGGGAATCATCCCACCCAGCTCTTGGAGCCAGATCTCTTGCATGAAAATCT  
TTGCTCGAACTATCACAGGTGCTAGCCATCCAGCAGGATCGAACAAATTTGCAATCTGTGATAGTACTTCA  
CGTTTAGTGAGCGAAGGCTGAGATAACCATTTTGGACGGAGCAAAGAAAAAACTGGTCTGTTGTGGCTTGCC  
ATCGAATGCCTAGCGTTTTAGCGACGCTGGCCTCTTCGATTTCTAAGAAATCCGCACACAGTAAGTGGTCC  
CTTGGTATTCCTTTTAACACTTCCTTTGTGTTGGATGTCCACTTTCTCAGAGGGAACCCAGCTCTGTCTGAGT  
GCCATGCGGAGTTCTGCAATGGCTGAAATTGCTTGTGGCTTCGTGTGTGCCCTGCTAGAACATCATCGAC  
ATACATATAATTTTCAATTATATCGGATGCGATGGGACAATGTTCTCGTATATCACGAGCAAGTTGACGGA  
GGACCCGGATTGCGAGGTATGGGGCACAGTTTACCCCAAAGGTAAGTGTATTGAGTTCGAAGTCGCAAAG  
TTCTTCGTTCTCATTGCGAAATAGTATTCGTTGGTAGGGCGTATGTCTTGGATCGACCTGGATTTGCCGATA  
CATCTTGGTTATATCGGCATTGAAAACGTAGCGGTAGAATCGCCACTTTAGTATCTGAATCGTCAGATCGG  
ATTGGAGTACTGGTCCCGTGTGTAGGATATCATTTAGACTTTTGCCATTGGAAGACGGGCTGGAGGCGTTA  
AACACAACGCGAACCTTTGTTGTGGTGCTGTCTGGGGCTTAAAAACAGCATGATGCGGCAGGTAAAAATTAT  
TGGGGTTGCTGTTTGGAGAGACTTGTGTATATGACCTAAGTCGAAGTACTCCCGAATCACGGAGTCGTAC  
TGCTCTTTCAAAGGAGGGTTTCTTTTTAAACGATTCTCGTTCTTTAGAACTGAGCTAGTGCGATAGATCTT  
GAATGTCCTAAGTCTATGTGATTAGGTTCTTGGAAAGGTAGGGTGACTACATATCTGCCATTCTCGTTCCT  
TGTTGTTGTTTCGGATGAAATTACTCTCACAAAAGGAGTCGGAGCTCTTTACCAGTTTGACTGGAATGTCCT  
CCACCTCCCAAATTTTGTGAGAATGACGTCTAATTGCTCTTCTTGAGAGACAGATATTCGAGTCGAGAAT  
GACGAGATTGCGGTGGATGCGGTCTTTGAAACTGGGCCTGTTAAATCCACCCGAAAATAGTTTCTGGC  
CCAGCAACGTGCCACATATATTAGGATGGGAGCCGCCCGTTAGTATGGACGGTAGGATATCAGCGCCAAT  
CAGCACATCTATCTGCGAACTCTTGTGGAAATTAGGGTCCGCTAACTGGAGTTTGGCAGGGTTGTCAATA  
AACTTTGGGGGATCGAACATGATGGTAGATTCCCTGCCAAATGTGGTAGGACGTAGGCTGATGCCTCGAT  
TTGGATACGAGGCTTGGAAAGGAGAGCCAATATTAAATGGCAGAGCTTGGCAGGGCTGGGCTGCAACAGC  
TTGATTTAATCCCGATACTTGTGCCTGTACGGATTGTACGGCAGCTTTATCAGGTGGAAGAGTCGCTCGG  
AAATAAATGTTGCCTCTGATCCCGAGTCGATCAGTGCACGAGCTGTATAATTTACACCCAAATGGCGAAC  
ATATATAACAGCCGTACTTAGGAGAACACCGTGGGTGTTAATTGCAACATAATTGTGAACATTCGTTTGT  
GGGATGGAGTGGACTGTATGGATTGATTGGAGGGAGCTGTTGCTTGTGGCATGGAGACTACTGTAGGGCT  
CAATTGTGGAGTGTCACTACGATGCAAGAGCGTATTGTGACGACCCTTGACGTAACAAATTTGTGAGCA  
CTTGTGCAATCCCTTAACTGATGACCCCTAGCGAAACAGTTCAAACATAGTTTTTGTCTGTTTGATGTGAGT  
TGCCCGTTTCGCTGACGGGCATTTGGAGAAATCGTGGGCACAGACGGATAGGGTGATTCTCCCTGGAGCAC  
AATTTGCAGGCTTGC GGCTTGTAGCGACCTTATTCTCAAATGAGTTAAGCCTTCTAGTGGTAGGAGGTTT  
TGTTTGAACAATTCTGGAGTGCGCTGGAGTATTGCGCTTGGCTTAAAGCTCTTCTATCGCTTCTAGAGTGC  
GATAGCGTTCTAAGAGAAAGGCGTTCATCTCAAGCCAAGATGAGATGTCGTTTTTTTTCTGGAGATGGACT  
GTTCCCATAAAGGAGAGTGTTAATTTGGGTAAATTTGGAGGAACATAGGAACACGAGGATACAGTCCCAGTT  
TTCTATGTTGATTTCCGATAACTCCAGAGCTGTTAAGCAACCTTGAATGGTGCTCTGAAGTTCCTTAATTG  
CCGTTCCAGACTCTTGGGAGATTGGCTGCAGGTTGAAAAGAATCTTGAGCTGGCTGTTGACTAACAATTTT  
CGGTTCTCAAAACGCTCAGTCAGATTGGCCCAGGCTGATCGGAAGCCATCGTTAGTCAAAGGTGACTTCG

ATACAATCGCCTGAGCCTCACCGCTGGTTTTTCGCATTGAGATGGAATAATTTCTCGACCTCTGATAACCTA  
GGATTATTTATGTAAATTGCGGTAAAGAGGTCTCGAAATGTGGGCCAACGTATGTAATCTCCGCTGAAGA  
TTTCTGTGTCGCAAGGAGGTAAAGCGACACCTGTGGGAACATATGTCGGAATGGTGGACTGAGCGGATGG  
TCTATTTTGGGCGTTAGCGGTATCGATTTGCTCGCTAAGTTTAGCGGCGCATCTCTCATATACCATGTAAC  
AATAGTCGTA CT TGGACTGCATAACTGAAATGGTTTCCAGTGAACCGGCTTCCGAGATTATTGTTGAGCCG  
ACCTCGTACTCTTTTTCAACCTTGTCCACAAAGGCTCGCACTTGGTCCCGACGGACCTGGCACGTATAGAG  
AGACGGGTCAGAGCCTCCAGGAGTGTTTATTTTTGCCTCAAACCTGACTTAGCCGATCAGTGACAGCAATA  
AACTTGATTAAGGCCGCGTCTGTCATATTTTGGGCCGTTTTGGTATTAGCTCGCGTGGAATCGGACTAGA  
TCTTGTGCTAATGGTTGCCTTAGTGCCTCCGACTGCAGTGGTCAGGGATGCTTCGCTTTTAGCTTTGGACG  
GCGGGCGACTGATTTTTATCAGTGGACTTGGCCTCGAACTAAGAGGTGCCTTAACAGTTCCCCTTGGCGTG  
GACGCGGATGATTCGCTTTTAGTCCGGGACGATGTTTCCCTTTTCGACTCTAAGGGCTGCTGTTGGAGACGG  
AGAAGTTCTGGAGGTGCTTGC GGACGGA ACTGCTAATTGATGCTTTGTTTCTTCCCCTTTGCCAGTTGGCA  
TACTAGGCGGAAGCGCTTGGGTAGGAAAACAAAGGTGCTCGTTTCTAGTAGTAGAGGTTGCGATGCTTAA  
AACAAAGAAACACTGGAATGCCGGTACAGGTAAATAATCGAGTTTATAATTCGATTGAGATTGCGGAAGA  
TTTAAATAATTTTGTCTAAAATCAAATTTATTTGATTAAATNAATTTAATTAATAAAATTTATTTGACTTGG  
TAATTTAAAAAATACGATTATTTATTAACACGGGAAATAATAATAAAGAATTCGATGCTCGTTTTTCGATA  
ATTTTATTATTATATTAGTCTTTGAATACGGTAACGGTTGGTTTATTTTTACTTTTTGTGGTACTCATAAAAT  
ACCCCACTATTGTGGCTGAGTACACACCGCTGACAAATGTAGAACTTCGAAGTTAATGTGTAGTGTTTTTG  
TTTATTTACAATAAATTAGTAGTATTATTAATCTATTAATTATGATTGTTGTGTTTTTATTTGGTGCGTCTCG  
GAACAAGAGTAATTGTATGGGAATGTGTGCAATTGCATAAAAAACGTGTAATTGGAGTACGGATCGGCAGC  
TGTGGTTTTTACATATGTGTGTGGTGTGTACATACGCACATACGCCGGTTGAAATTGCAATTTATTACTAT  
AATATTGCTGTGTTATAAATATTGCTGTGGATTGTGCACTAAAAATATTATATGTGGACACACATAGTACAT  
ATGATTTGTGGATTTATTTATCGGATGTATGTACTATGTGGTTGCACAAATATATTCGTTTGCCTATGCAC  
AATTATAAGTTAAGAGANTGAATTGGAGTTTGTGTTTATNTTTATTAATAATAAAGGTTAAATATAGTGTC  
TATTCAAAATGCATATGGGCAATTATATTCGGATTGAATATATGTATGTATGTATGTACAATACGTG  
CTGGTGAACCTGGTGTATGTTTGTGTGTCGGACCAAGAACATGAATTAACAATATTAATTAGGAAACAAT  
ATTGTGAAGCAACTTGTGCGATTAAAGTGCGGACACGTAATTAAAAAAATTTTTTTATAGTTAGGAAAGTG  
CACGAGTGCGTACGTATGTACATACAAAAAATGTTGAAGTGGATTTCTTTTGTAGTTGGAAGTAACTAAC  
ACAAAATTTAACTAACTGTTTTTAGTTTTGTGGTTCGGATAATTTATATATATTCAGAAAATATGCNNATC  
AGTTTTCTTAAAAAAAATATGGCGGAAAAATATGGCGGATATTGCCGAATATATATAGAAAGGAAATTT  
TGTATTTACTTATCTTTGCCAAAAACTTGTGTAGGGGCGATCGGTTTATATATAATCCGGCTCGAAGGACC  
AATGTTTGTGGGGGTGGCGTCAGATAAATAATCCTTGATTATTGTTGGTGGAAAAAACCCTTTATTAGAA  
GTTTCTGCTGCATGTAACAACTCTGCTGGTTAAGTGATTTTACATATTTTTGGTTGGAGTGATGGAGGTG  
GAAAGGAGACCACAAGGAGAGTGCTGAGCGCATCTGGGATCGAATTAGTGAGTGAGTCTCTCTCAGTGA  
GTGAGTCTGTCTCACTGAGTGACTCTCTCACACTGAGTGAGGCTCAGTCAATGCTGTGTTACACTAGCAC  
TGA ACTGGCATGAACA

>Ref\_dvir\_750

CCTCTTGTGCTTAAATTATATGAGATTGTCCCATTTAGAGCCATTTAGTAAAATTTCAAACCTCAACCCCGC  
ATGCCAATGAGATTTACATCAAAGTGAATATCATTATATTACTGATACATTTAATGAAATATTAATGATCT  
TGTTCTTGATCATTATATCAACGCTTATACCGACTATTATATTTAACAATATATGTTTTCTTTCTCAAACGA  
ACTGATTTTTAAAGTTTTTGAACTTTATATGCTAGAAGAGCATGCTATCTTGATCATGTCTTTAATTAACCT  
GTTTTTGCTCATTGAGGATACGATACAACTTACGTGCGAATATAGCGTTTTACATATGATGAAGTATGAAA  
TTTAAATGATGTCGGTGAAAGATGATTTAGTAAAGTGATGTTTGAGCTCAAATCAGCACCATCTGTAAATG  
AATAAGACTTTAGTTTACGTATATATGAATTAGCTTATATTCAAAAGCAAGTATACCGTTCCCTTGCAAAA  
ATCATTGTAAAAAAACATGATCAGTTAATATTTTAACTTGGCTTACAAAAAAATTATATATACTAGGAATA  
ATTCAAGGGCAGGGCGGCCACGCTGCACCATTAAGAATTTGGATTTACGAAGATCTTATTTTGAAATTGCT  
GTTAGTTTTCTTTAGCATATTTTATAACGAAGGAGGGCTGCTGCTTATATATATGTAGATGGTTTTTCAGA  
GTCCATTTTCACATTGGCGTTCCGAAGATATAGGTTATGTGAAGCACGCGCTAAATCTGAGCATTGAGGCT  
ATATGCGAGGCCATACGTGCTTGTTGCTCCTTTCACTGTGAAATTTAAGCTGTTACTGTGGCCGTGCAAGC  
TACTTATGCCAACAGCATTCCGTCGAAATTTTCGCCTTTCCGTGGATAGAGAAAGTTCTTCTAGAATTCCA  
CACTCGTGGTGGCAGACTCTCACGGTGGACTTCACACCCGTGGCTATGGCAACACGGCCTAACTTCGCC  
GGCTGTTATATTGGCCTACTGATCAGTATTCGGTTGGTGGTAAATTTCTTCCACGTGTCTTTAGACAACCG  
GTCTTCTCGGCTTGCAAAAGATTACTTGATGAGCTCTAAAATGCACGTCTGCTTCGTAGTGCCGCCGAAAT  
TAAAAAGAAATCACGCCACGCGATTTGGTTTGGTCTCAGCATCGGTATACAAAAAAAAGCTCTCCAATCA

ACGGGATCCTTCCAATGCTTTTGGACATCTAGCGTTGCCAGATCACCCGATTTACAATTTTCTCTTACCAGAT  
AAGGTTACCACTTAAATGTAAATTATTAAGAATCAGCTGACACTTTCTGACTACGTTAAAATAAACAAAC  
ATCTTTTCCCTTGCTGCTGTTCTATTTTTTTTAATTCGACATTTGATATATGCTGGTAAAAGTTTTGCATT  
AATGCCTTTACTAGCATTGCTTAGAGTAAAATTCTTTTTAAAAATTTCTGTCTTTGTAAATTCACCCATCT  
CGATCTTCGATTATAACATTTTTTCTGATTTTAAATGTGCTTCCAATAGATTGTCTTTTATTTTGTATGTAGC  
AGTTGCATTTTATTACAATGTGGCATTACATTCACCTGATTATCTCGCAGCGCTTCTAATTGTTGTAACAAT  
TTATAACTTTTTCCATGCCTTAACATCGGCTGACCAAACATGCTAAAATATGGAGTACATTTTAGAGAGCT  
GTGATAATCGCTACGCAAGACACTACAAATTTCTGACAAATGCTTATCCCACTGATCGTTTTTTTTTCTTAA  
GCAAAATCCTTAGTTTAATTAATAATTTCTCTATTTACTCTCTCACTGACGTTTGCTTGAGGAGAATATAAGC  
CTGTACGTATTTGTGCAATCCCATATTTATGTAAAAACTCTACCATTTGAGAAGATACAAACTGTTTACCA  
TTGTCGCTATGAATATATTGTGGAACACCAAAAAGTATGAAATATGTGTTCTTCTAAATACTGCATAATATT  
TATGCTATTGGCTTTTTTTTAGTGCTTTTAAGATATGTACTTCGTAAAATGGTCAATAGCAATAAATACCATC  
GAATTGGTCTCTCTGTAATTATTTGTTTTCCCATGGGCGGTCTTTGAATAATGTTACTTGGCTTTGCCATCT  
TACAATTTTCACATTGCTCTACAAATACCTCAACTTCCTTACACATATTGGGCCAATAATACTTTTCTCTAA  
TTCGCGCGAGAGTTTTTACCAAAACCTGCATGACACGATGAGTCCTCAAGATTACTTGCAATAACTTGAGCT  
CGTAACTCACTAGGTAAAAACAATCGCCATAAGCTAACTTCATCTTCAAATTCGTTTGGTATACGAAATTG  
CACGAAACACAAGTATCTGCAACGAATTGCCATTTACTAACTAGCGTTCTCAATTTGTCATACTCGGGTGA  
TTGAAAGCATTGATTTTCCAAATCAATTTCTGATAGCTTCTGGGGTGTTTCTAAACAATCTAAATATCCCCT  
AGACAGAGTATCGGGTACTACATTAAGTGAGCCTTTACGGTACTCAATTTTGAAATCATATTGTTGCAATT  
TTAAGCTCCATCTGCCTAGTCTCCCTATTACATCTTTTTTTGTGATAAGCCATTTAAGACTGACATGATCAG  
TTATCACTTTAAATGGTAAGCCTTCTACGTAGGGTCTAAATCTTTTTTAAACACACTATAGCTGCTAAGCAT  
TCTAGTTCCGTGACTGTATAATTTTTTTCACGTTTCTTTAATTTCTGAGAGACGTAAGCTATAGGGTGTTCT  
TGCCGTTTATATCGCATTGTGTTAAAACGCCACCTACTCCTGCCCAGCAAGCGTCACATTGAATAGTAAAC  
TCTTTATTAAGTCTGGCTGTACCAACACTGGGGCGGTTATCAGTGCTTGTTTAAGATTTGCAACTGCCTG  
TACTGCTTCAGGCAATAATGCGAACTTCAATGATTTCTGCAGAGAATCCGTTAATGGTGCTGCTAATTCAG  
CATAATTTGGGATGAACTGTCTATAATATCCAGTCATGCCTAGAAATCGTCTGACTTGCCGTTGTGTTGAT  
GGTACTGGAAAACGAACGATATCCTCTACTTTCCCCGGGTGAGTTTTCAAGGTTCTTGACCCACAATATA  
ACCTAAGTATTTAATTTCTTGTTGACAAAATTTACTCTTCTCGACATTAATAGTTAATTGAGCCTTTTTCAA  
ACAATCCGCTACTTGTCTTAGTGTTTTAAGGTGACTATCGAAATCCGAATTGCATACTAGCAAATCATCAA  
GATAAATAAAAACTTTTTCTCTCAACGACCCTGGTATTACCTTATGCATTAATCTACTCATTCTTTATGCTG  
AATTACACAAGCCGAAGGGCATAACAGTGAATTGGTACAAAGGTCTTCTGATATAGCGAAAGCCGTTTT  
TTCTCTCGATGCTTCACCTAACGTTATTTGCCAATAAGCATCTTTCAGATCCATACCTGAGATGAAGTACG  
TATCTTGCAATCGACTGAGTAATCCATTGATGTGTGGCAGTGGATATGCATCTTTCTTAGTAATAAGAATT  
TAATCCGACGAGAATCAATACACAGCCTGACCTTTTCCAGGTTTCTTAATAATACTATGGGGACTGCACC  
AAGGAGAATTTGCTTTTCTTCTATTACTCCCAAACTAACATACGATCTAATTCTGAATAAACTTCTTTTTG  
TCTGGGTAGTGACAAAGGATAGTGCTTGAGCTTAAATGGCTCTGATGTCGCCGTATCAATATCATGGATAT  
CTAGATTGGTACGACCTAGTCTAATTTAGTAAACGATGGAAATCTTCAATAACTTCTTAAGTTGTCTG  
GTTTGAGTATTCGACAACGATTTGCTTTTAAATCATTGGAACATTATCTGGTTGCACTTCTAATGCAGAAAT  
CAATTTTGAGCTATATTAAACTCTTTCCAAAAATTAACCTCTAAATAAACTTCTTGTTGTAGACTGGGTA  
CTAAATAAAATAAAATGTTTTTCTCTAATCCGTTATAAGAAACCCCTGTTTCTACCGTTCCCAAAATGTCT  
GTAACCTTTCCATCAGCTGTTTTAATTGAGCATTTTAATTCTTTGATTGATAAACGCATTTTATCCATTCTCTC  
CAAACAATTTTTTCTTAATACTAACTGATGCTCCTGAGTCTAATAAACCATACTTCTTCATCGCCTAT  
CCGAATTTTTGCATATGGCCTATTATCATTGCTCTTGCTGCAAATAATAGTTTCTAATTCCTTTTCGTAAATG  
CATTCTATTATCTTTCTCTACATTTTAATATTTTAGATGATTTTTTCTTAGACTTAACTTGCATTAAGCTG  
CTCTAAACGTAATGTATGTAATTCATTCACTTTAAATTCATTAATTCTTCTGTTTTAGATTTATCTAATTGT  
TTGATTGGGGTTTCTTTCTCGAACGAGGTAACCCCTTTAATCCACGTTTCGGCTAATTGTTTCCCTTATGCT  
TAGGACAAGTAAGGTTACATTTTTTCTCTCCACATCGGTAACAGAAAAGAATCCTTGTTGCAGACGGACAG  
TCATAAAACGAGTGACCTATTTGATCACAGTTCCAACACCTATACTTGGACTTATCTACTGCCTTTTCATAC  
TTTTCTCGAATTTCTTAAAGCGGATAATTCAATTTCTTTCTCGCTGTCAGATTCTTCTGCCTTTAGATCCG  
ATACTTCTATTTCAATTTGCAAATTTACCAGTTGTCTGCTGCAAGCGTCTAATTTGTTTACGAGCCATAAACT  
TTTCGGCCTTACGAGCTTCCGACAAAAGGTGATCTAAACTAAAAATGCTTTGGGCGAACAATAGGTTGCC  
TAAAGATTCTCTAACATTTCTTTTATAATATCTGCTAGTTTTGCATCACTTAACGGTTCTTTTCAGACGGGA  
ATTCTTTGTGACTACATCCATATAAAATTCATCAAACGTTTCTTAATTGCTGTTGTCTCCAATAACACGCA  
TCAACCTTTCAGATTCGTTGTCTGTCTCTCCGAACCTTGTGAGTAATAGCTAATTTTAAATCCTTGAAAGTAG

CTTCTGGTTCTTGCTTCAGATAGAACCAATACCATTTTTTCGGCTTTCCTCGTATCAGTACATGAAACTCTG  
CTAACAATCGAGATTCCGAGCCCTTTTTACTAATGTAGCTACTTTGAATAAAAATTCTTCTACATCATCACT  
TCCATCATAAGAAATATTCCACTTATCCACTTGCACCTTTGTCATTGCTCGCTATAGGAAAATTATTGGAATT  
ATTCAAATTACGTGACTGGTTACGACTAGAAGTGCCATTTTCATTAGGCAATTCAAGATAATTGTAAAAAT  
TTTCTAATGAAGGTCTAGCTCTTCCTTCGCGTACTGCTTCTACTAAGTTACGTTGCATATTAGCAATCTCTC  
TCATCATCGTATTGTGGTTAATTGTAAGAAGTCTTTCTAACACTGCACCTTAGAGTTTCACCTAAGCCACTA  
GCTTCTGGACCTTCCGCCATATTAATGTTTGGAAAACCTTTCTACTTCGACTGTAGGCTATTCTGCTGAGCTC  
GGACTATATGTGCGCCGTCTTCCTCTACCTTGCGCGTTTCCTTCCTCGTCAAACGTGTATTCTACCTGTGAT  
TGATTGGTCTGAGTACTTTTTGTGTTTTCGCTTTCCTGTTCTCATACTCCAGTTTTTTTTTTTTTTTGCTATGG  
ATTTTTAATGCTTATTTTCTTAATATAATTATATTATTAAATTCTGTTATTAATATTACTAACAATTTTCTTA  
CAATTCATAATTTTAGAGGCATACAAATACTTCCGTACAGACTGTTTTTCGCAGTTTAAAAAAAATCTTCT  
ATCGTGACAATAATTATTTCTGTGAATTACTATACTTGACGATTACAAATTGGTTGAGCTGTCACTATGGC  
AACATTGTTTCTGATTCTTTCAAGTGACAAGGGACTCATATGACAACACCAAGGAATTTAAATTGAATCGC  
TTCATGTAGCAATATATTGTAACGCTGGTGGCTGTAGGCGGCTAGAATAGTGCACCTGATATATGCATGATA  
CCTAGGGCTGTTTAACTTATTGATGCTCTATTCTTATGAGTGTTTCGTTTCCTGCTTGACACGTCTGGTTGCG  
TTGCTTAGCTCGCCGGATGGGGTGTGAGATCTTGAACTAACAACAACTCATAGCCTAAGAATGCTACTGC  
TACCGAAACAATAAATAACAATAACACGTGTCAAGACTGGTGCTTATAAAGCGGTATTAAGTGAAGCG  
GACAGACGTTATCGTTCACGATAGTTTTTGGCTCAGTTGGATGGCATAACTGAGGCTACACACTTAATTTT  
CCCTCCCTATAAATTGCTCTGATCAAAGCAACGCCATGACAATCCTCGTGTGTAAATTATATGAGATTGT  
CCCTTTTAGTCTATTTAGTTACATTTTAACTTCTACCCCGTCTTTATACTTCCACATCTGCATGCCTCAAAT  
GAGATTTACATCAAAGTGAATATCATTATATTACTGATACATTTAATGAAATATTAATGATCTTGTTCTTG  
ATCATTATATCAACGCTTATACCGACTATTATATTTAACAATATATGTTTTCTTTCTCAAACGAACTGATTT  
TTAAAGTTTTGAACTTTATATGCTAGAAAGAGCATGCTATCTTGATCATGTCTTTAATTAAGTTGTTTTGC  
TCATTGAGGATACGATACAACCTTACGTGCGAATATAGCGTTTTACATATGATGAAGTATGAATTTTAAATG  
ATGTCGGTGAAAGATGATTTAGTAAAGTGATGTTTGAGCTCAAATCAGCACCATCTGTAAATGAATAAGA  
CTTTAGTTTACGTACATATGAATTAGCTTATATTCCAAAAGCAAGTATACCGTTCCTTGCAAAAATCATTG  
TAAGAAAAAATGATCAGTTAATATTTTAACTTGGCTTACAAAAAATTATATATACTAGGAATAATTCAA  
GGGCAGGGCGGCCACGCTGCACCATTAAAGAATTTGGATTTACGAAGATCTTATTTTGAAATTGCTGTTAGT  
TTTCTTTAGCATATTTTATAACGAAGGAGGGCTGCTGCTTATATATATGTAGATGGTTTTTCAGAGTCCATT  
TTCACATTGGCGTTCGGAAGATATAGGTTATGTGAAGCACGCGAGCATTGAGGCTATATGCGAGGCCATA  
CGTGCTTGTTGCTCCTTTTACTGTGAAATTTAAGCTGTTACTGTGGCCGTCGAAGCTACTTATGCCAACAG  
CATTCCGTCGAAATTTTGCCTTTCCGTGGATAGAGAAAGTTCTTCTAGAATTCCACACTCGTGTTGGCAGA  
CTCTCACGGTGGACTTCACACCCGTGGCTATGGCCACACGGCCTAACTTCGCCGGCTGTTATATTGGCCT  
ACTGATCAGTATTCGGTTGGTGGTAAATTTCTTCCACGTGTCTTTAGACAACCGGTCTTCTCGGCTTGCAA  
AAGATTACTTGATGAGCTCTAAAATGCACGTCTGCTTCGTAGTGCCGCCGAAATTAAAAAGAAATCACGC  
CACGCGATTTGGTTTGGTCTCAGCATCGGTATACAAAAAAGCTCTCCAATCAACGGGATCCTTCCAATG  
CTTTTGACATCTAGCGTTGCCAGATCACCCGATTTACAATTTTCTCTTACCAGATAAGGTTACCACTTAAAT  
GTAAATTATTAAGAATCAGCTGACACTTTCTGACTACGTAAATAAACAACATCTTTTCATATTTTACA  
AGGCAGCCACCTTCTTCGCAGGCTTCTAAGCCGAAGAAAAGGAAGAAACGGTTGACTTATCCTCCTTTAC  
AATTTTCTCTCGTGGGGCTCGACCACAACCTGAGATAAAGCCGGGCACATTACATAGCTTTTAGATCTTT  
AGCATGAAATTTTCTTACAAATTTCCCTTGATATTTTCTATTTTATATAGTGCTGTTTCTATTTTTTTTTT  
GATTCGACATTTTATATATGCTGGTAAAGTTTTACATTAATGCCTTTACTAGCATTGCTTTGAGTAAAT  
CTTTCTAAAAATTTCTGTCCTTCTTTGTAATTCACCCATCTCGATCTTCGATAATAACATTTTCTGATTTT  
AAATGTGCTTCCAATAGATTGTCTTTTATTTTTGTTCATGTA

>Ref\_dvir\_303

TGGTGACATGGTGAATATAATGTCGTAGAAGAATGTTTTTTTTTTGGGATCTTCAAAACCTTAAACGCTGA  
AGATCATGGCTGGGAGGGTATCGAACGCGATATTGGCACTTTTGCTCGTTAAGTTATGCCTGTTTAGATTT  
TGTTTCTTCGGAGTATCGGTCTCCAATTTAGATTCTGTAGGGATCCTAAAATAAAATTGTGTATGCAGGTC  
GAGACATGGCAAAAAGAACCCCCCCCCACCCGAAAGAGCTAGGGAGCAAGAGGATCCCGCCCTGCCATGCT  
AACTCAACCACGAGGAGCCTCGGTGAATACTTCCCGAATTATTTTGTGAAGATTGGCTGCCAACCGCCGTC  
ACCGTTGCTACCCGATATGTATTGCTAGAGTAGCTTCACCACAGTACATGCTACAATTTTTCGAGGGTGTC  
TAACAAGATAGTAATTAGGACTACGATGCTTACAATTCAAGCTTGAATTATGCCGAGAATCTGACCTTACT  
ATATTGTTGAGTGCTTATATATAAACACGACTATAGTTATTAACACCAGCTATACAATCGGTCCCATACAT  
TTGCTCGTTTTCTTTCTTATAATTTTGGAGAAACAACAGATTAGGTTTGCTTAGGTAGAAATACTTTCATAT

GCAATTTTAGAATACTGCATATTTTGATAAGATATCAGTACTGATTGCTACTTGATAGCTTGTGGATGGTT  
AAGTAAATTTTCAGTCTTCGTGGAGCCAAAAGTTATAAAATTAGATTGAATGGTTTTGTATTAACGATACTA  
TCAAAGATAGTTAGAATGTTGCCCGGAACCTTGGCCATATGCTGCTTTGCATATCCTTGCCGAACATTTCTG  
ACTGGATTAAAATGTTGAATGTTACAAACCGCTTTCTAAAGTAGTTTCAATAAACAGATAAATTACCTAC  
TTTCATTGAGGCGATTATATTTTCGTAATTAATAATCATGTTGCCTTTACGCAGCCCAAAAATGTACAGCCG  
CCAAACCAATGTCACGCATCAGAATTTAATTAATCATGTTGCCTTTACGCAGCCCAAAAATGTACAGCCG  
TCGTCAGAGAGAGCTGATAACCACTGTGTTCTATGCCAGTTAGTAATGGACATACACAGTCTTGCTATTGC  
ACCCCTTGTAGGCATGTTTTTCACAACTTTGCTTGGAAGGTTGGTTGGTAAACCATGCTAAATGTCCCAG  
TTGTAGTGCTGTGATTGACCCAGCCTCAATTAAATTAGTTGGAGATTGCTCGCCGAGAGGAAAACAATCT  
GCTCCACCTCCACCTACGAACATAGGGAGAACGGTAACGCGCAGTCTAGCAAAATCTCTTAATCCTGGTC  
CGACCCAGAGTGGCGAGAATCCAACAGCAAGGTTATTAGATGTTAGTGATGTACCACAATCAGGACTCGA  
CGTAGCAATAGCACGAATCCACCTGAAATCGCTCCTGCACGACCAGCTCCTGGTGTAAGAAGAAGAGGA  
AGACCCACTCAGTCCAATAATACCCGCCAAAATCTGGGAGTGGACTATAGGATAATTCAGGAGATGATCG  
AACAAATCAATCACTCGCGTTATGTTCATCACTGCAAATGCAAGCAACACCCCTTTCCAAGAGTGTTGCCAAC  
CCGATCCCGGTGTCGCCTAGTAGTTTCGTCATTCCGAAATGGAAAAATTGCTGACACCATGCAAAAATGGA  
ATCTTAATTTTCGATGGGTCTACCGAAGGATTAGGGGTAGAAGAATTTCTATATAGAGTCCAAACATTGACT  
GATGAACTTTAGACAGCGACTTTAAGCACTTACATGTGCTATTTTTTAGGCCAAAGCCCGTGACTGGTACT  
GGCGGTACCACAAGCAGGTAGACCACATAGTCTGGACTGAATTTTGTACTGCACTTCGCCATCAGTACAA  
AGATTATCGCTCCGATTTTATGAGCAAGGAACTAGTAAGAGCTAGAAAAGCAAAACCCCTGGGGAATCATT  
GTGTCGTTCCATGACGCTGTAGCGTCACTGATCGATAAATTTGCAATTAATAATTGACGAGGAGGAGTTAA  
TCGAAATTTTAAAAAATAATTTATTACCCGAAACCCGACATAAACTGCTATACCAGCCAATAAGTTCAGTT  
GGCCATCTACGTAGATTGGTCCAAATGAACGAGAATTTAGTTCATGAGCTCAGTTGTGCGCACTGATGGTAT  
GAATAAATCCAGGACTATTGGCCGTCGCCAATTGAACCGGAGGTAGAAAATTCAGAAGATACAACTTTG  
ACATCGCAGCAATTCGTAGATGTCATGCCAACTTTAAATGTTGGAAGTGCAGAGGAGGAGGAGTTAA  
GGAAAATTGCCTTGCTGACCGCCGTATATTCTGTTACGGATGCGGGGCACCCAACATTTATAAGCCCCAGT  
GCCAAAATGTATCCGTAAAGCTTCGGAAAACCAACAGAAGGGTGCATCCAGCAGCAGTCGGATGCCCCC  
AAAAATCTAATTAATTCCCATACGAACCTGTGTACCTGTGGACCGAAGCAAAAGCTTGTCCCTACACCGAC  
GTTATTATTCAAAAATCAAGCAACATAGCAAGCTTTTAGTTTCGACAGTTTTTTGCAATCCCACCGATATG  
CGCAGCTATGCCGAAGTGTCATTTTTTAACCTTTACCGAGCTTGGTCTATTGGATACAGGCGCGAATATGAG  
CTGCATAGGTTCTACGCTTGCGCAACAAGATTTTACCGCAATGCCAATCGCAGTCAGACAGCAGATGGCC  
ATAGTCAGAAAGTCATCGGAGTGCTTGAAGTTAAAATGCAGTATAAATCGGCTACCAAGTCCTTGAACT  
GTATGTGATTCTTTCTATAAACCAAAAATCTAATTTTGGGTTCATGATTTTTTGGAGAGCCTTTGAGCTTGCGCC  
AAGCATTATAAATTCTGTAGAACTAAAATCAATGGAAAAAGAGCAGGAAACAGAGTCGATTGCATACCC  
CTTAGATAGCCAGCAAACGCAACAGCTGCACGTAGTAAAGCAGTTGTTCCCCAACGCTGCTGATAGATTA  
GGCCGCACAACATTGATCCAACACCGTATAGATATAGGAGACGCACGTCCAGTGAAACAAAGATTCTATC  
CTGTAAGTCCGGCCGTAGAAAAGTTGTTATATGCAGAAATTGATCGCATGTTGCAGCTTGGAGTTATTGAG  
CCGTCTGTAAGCGCTTGGAGCTCGCCTATGCGACTCGTCCCTAAGCCCAACAAGGTGCGCCTTTGTCTGGA  
TGCTCGAAGACTGAATGACGCCCAAAAAAAGATGCTTATCCTTTTGCCGAGCATCGGATGGCATTTTTTC  
GCGGCTACCTAAGGCGGAAAATAATTTCCCAAACCTAGATTTTTTGAAGACGCCTATTGGCAAATAGAAC  
TTTCCGAGGATTCAAAGCCCTCTCACTGCTTTTACCGGTCCCCGGAAGACCGCTATATCAGTTTAAGGTCA  
TGCCCTTTGGCCTTTGTAACGCGCCTTCTACCATGTGTGCGTTAATTGGACGAGATAATTCCTTCTGACCTG  
CGCTATTGCGTGTTTGGTTATTTAGATGATCTGTGTATTGTGTGTCAGAAGATTTTCAGTTCACATCTGGCGGTA  
TTGGTTCGCATTGCTGAGCAGTTTAGAAAAGCCAACCTTGACTTTAAATATTTGAAAAGTCAATTCTGTGT  
AACAAAGTATCAATTATCTTGTTACGTGATTGGTAGCGGAGGTATTTGCACAGATCCGGAAAAAGTAGCT  
TGTATTGTAAATTGGCCGCCGCCAAAAAACTTGAAGCAAGTTCGAGGATTTCTAGGAGTTTGCGGTTGGT  
ATCGTCGGTTTATATGCAACTTTTCCGATCTCACTTGCCCCATAACGGACATATTATCGACAAAGAAAAAG  
TTTGAGTGGACCCCTGAAGCACAGACCGCAATGGACAACCTTAAAAACAGTGCTAACATCCTCGCCGTTT  
TAAAAAATGCTGACTTTAAGAAGAAATTTTTCTTACATTGTGACGCTAGTGATTTTGGCTTTGGCGCCGTT  
TTATTACAGATGTCTGGAAGCTAATGAAGAACAACCTGATGGTTTTCTTGTCAAAAAAATTAAGCCGTGC  
GCAGCGAAACTATAGTGTTACCGAGCGTGAATGCCTAGCAGTCATATTAGCCATCGAGAAGTTCCGATGT  
TATTTGGAACCTCCAGGAATTTGAAGTGGTTACCGACCATCTAGTTTGCTATGGCTTATGCGCCAGCAAAA  
TATATCGGGTAGACTGGCACGATGGGTTTTTAGACTGCAACAATTTAAATTTTCCGTCTCCCATCGGAAAG  
GCAAAGAACACATTGTTCCCGACGCTTTGGTCTCGGTTGCCTGAGAATTGAAATCGCTCAATTTAGACATG  
GGTCCTTGTAATAGATCTTGAGTCCGATACATTTATGGACGCTAGCTATGTACAAATTAAGACAAATTTT

CCCAAAATTTTACTCAGTTTCCGGACATAAAAATCGTTGATAAGTTTTTGTATGTACGCACCGAACATTTCG  
AGGGGAGACTCGACACCAGAAAGTCCTTCATGGAACTATGGGTGCCTGATCGACTTAAAGTCGATGTGC  
TCAAACAAGCCCATGACAGCATAACGTCGTCTCACGCCGGCATGCAAAAAACCATTGAGAAAAATCCGCAG  
ACATTTGTTCTGGCCAGGATTAGTTAAAGATGTACGTGAATACATACGAAATTGCGAGATATGTAAAGAA  
ACTAAGGCTCCAAATTATACCCTTCGGCCACCTATGGGTGCTCACATCCCAACTTGCAGACCATTTCAAAG  
GCTTTATATTGACCTGCTTGGGCCATACCCTAGAAGCAAAAGCGGTCATGTGGGATTGTTAATAGTCTTAG  
ATCACTTTAGCAAGTATCATTGGTTGCAGCCCCTGAAGAAATTCACCTCAGCTGTGATACAAAAATTTCTT  
CTTGAACAAATTTTCCATTGTTTTTGGTGTGCCACAACTATAATAAGTGACAACGGCACCCAGTTCAAAGC  
TCGTGAGTTCAATGCCTTCTTAGCCGAACCTTGGCATTGAACATCTGTATACAGCTCTATATTCACCGCAGA  
GCAATGCTGCAGAACGAGTTAACCGCTCAATACTCGCCGCCATTTCGCTCGTATTTAAAACAGGATCAGAC  
CCATTGGGATGAACATATTACAGGGATTTTCATGCTCCTTAAGGTCTGCTCTGCACCAATCGATTGGGTGTT  
CTCCATACCGTGCCCTATTCGGGGTGGATATGATCACTCATGGTACCGATTACAAATTATTGAAGGAGTTG  
TCCTTATTGGAAGAACCGCTGGTCCCCCTGTTGCGGTCTACCATTGTCATTGCTAAGGACAGATATTCAG  
AAAAACATCAGGAAAGCCTATGAGCGCAATGCGGCTCAATATAATTTACGCAGCAAGCCTGTTTCTTTTC  
GTGAAGGACAGGAGGTGTTCTGTGCGAAATTTTTCGCTTAGTAAGTTTATTAAATGCCGGGTAAAAA  
ACTCGGAAATTGTTTTTATTCCCTTGAAAATCAGCAAAGAAAATTGGCACTTTTCATGCCAGGACATTAGA  
GTCTATTCCCGCTATATACCCGTCTAACGGTAGGATATTATCGGGTTGTAATGGTCGCAATCCTATTGAAT  
TAAACCGCGTAAGCGATCCTAACAGCTTGCGTTTGTGTAACGACGCTATAGCGATCAGCTTTTGTCTGTCA  
CGGTCAGCTGCGAATGATTCTGCCGCTGCTATAAACCGCCTGCGTGCACGTTGGCAGCGCAGCTATCTTCA  
ATCTAATCCGCGAAAGAAAAAAGCTCTGAGACCCTATATAAGCCTGTAGGTCCCGGATATAACCCTTCT  
TTTTTCAAAAATTTCTTTACCATCGAAGGTCTGGCTACGGCGGTTCCGGACATAGCCCCACCAAAAAAATT  
AAACTAAAAGCATCAGTCGTTTAATTCGTTGAATTTAAATTCCAATAAATTGAACCAAAAAACAAAAA  
AAAAAATAATAAAAAAGGAAAACCCTAAAAGTGGCCGATGGGCGAAATATCAATTTTTTT  
GTTTCGTTTGATGATAAACCTTTCGCTACGCCAGCCGGCCACCAGCACCTCACCGGCATATATTTCTTTGTG  
CCAAGATCTGGTCACTGTTTTAACCAGTTCTTGTCTGCCTGCCGAAAGTAATTTTTGGAGGAATCAATCTT  
GCCGCCGCGTCTCTGACATAAAAACCCACTTATTTTGAGGCAACCGCCACGTGTGCCATTGGACGGCA  
CTGTAATTTCTTGGGACGGCAATGTCATTTCTGCCCCCATTAAATAGACGTCAGCCTCAACTGCGGATCAG  
CTGCCATTCCCTTGCTCATGCCAGCAAGAACGGGCAGGCGCCGTTTCCACAGTCTGGAATCCGGAAGAGG  
GAGTAGCCTTTTGGGCCCCATTGACGCGCCGCTGATCAGAAGCCCAGATGACATCGCCCATTAAGTTGGC  
CGGAGCGTGCAGATGCATGAAAATTGCTGTTAAATGTTTTTAGTAAAAAATTGTTAATTAAATCTTATGA  
GAGACTTCCAAAAGTTTGTGCAAAGTGCATTTATTAGGGCCCTCAAAAAACCGCGTGCAAGTGCAGGGAA  
AAAGAAAAATTTACATCTATATACATATCTTTATATATATAGAAAGGAATAATAGTATAAATCTATCCCC  
TTCTTGTTGGGGTAGAGTCCAAAGTCATTTCTGAATTTTTTTTTATATTTTTTTTTTAATTTTTTCCCACAATT  
AAAAACCCTCCGGGCCCTAAATATATAACCAAAACATTTAAAGCCCCCGAAAAAACAAT  
TGGAAGAAAAAACAATAAAATTTGCTGCAAACTCTCCGCTGGAAGGCCTTTCATCGAGGAATACATGTA  
AGTCTGTACCTTTTGTGTTGAGTATATTTCTTATTTTGGCACAGATAAGCACAGCCAAGCTGACATGCGC  
ACCTGCTGAGTTTTTTTTTCGACTTTCTGTTTCACATTACGCTTTAGCTCCGATCAATATGTTTATGACCGT  
GTCAGTCTGGTGAATGCTTATCATCTTTGATTCTACCTACACCCCGCTCAATTATTAGCTGAAACAGAAGC  
AACCTAAAAGAAAAGATTTTTTAACAGAATCAAATATATGTACACAAAGATGTATCATCGTATTCACTGAT  
CAGCTGGTTGCGCTGCGCTCCGATTTGCCCATGCGCTTCGAGCTTAACCTTCTGTTGCCCATATTTTTTTTC  
AACCATACAATTAACCATCAACTACAATTATATTGACTCTATTATAATAAATTTTTTTTGGCTTTTGCCGAAT  
ACACTTTAGTTCAATTTACTAATGTCATTTTTTTTTCTTGCCTAGCCTTATTCTATAATTATTAATGCACT  
TTAGCGAAATTTTGAGATTTTTTTTTTATTTTGCTCAATAAGAAAAAATATTAAGTGAATAGTTTATAA  
AATGAATTATTTTGAAGAATTTTGGAGCCATTGTAAAAATATTAAGTGAATAGTTTACTGAATTAT  
TGTTGAATCATTAATGCCACTTGTAATAAGATGCAGATTATCCAACGGAAGGATTCAATTTTCATTGAATAA  
TGCTTTTGTGTTATAATAAATATTAATTACGGATTTTGATTATGAATTGCTAAGTTTTCTTTCCTGGTGACAT  
GGTGATATAATGTCGTAGAAGAATGTTTTTTTTTGGGATCTTCAAACCTTAAACGCTGAAGATCATGGC  
TGGGAGGGTATCGAACGCGAGAGTCAGCTTACATCCAAGACTTCGCCTCTACGGAATATATATGCCCTAA  
TGAAAGCTATCACCATTGTATTGGCACTTTAAGTGCTCGTTAAGTTATGCCTGTTTGAGATTTTGTCTTCTC  
GGAGTATCGGTCTTCAATTTAGATTCTGTAGGGATCCTAAAATAAAATTGTGTATGCAGGTCGAGACATG  
GCAAAAAGAACCCCCCACCAGAGCTAGGGAGCAAGAGGATCCCGCCCTGCCATGCTAACTCCAC  
CACGAGGAGCCTCGGTGAATACTTCCCGAATTATTTTGTGAAGATTGGCTGCCAACCGCCGTCACCGTTGC  
TACCCGATATGTATTGCTAGAGTAGCACAGTACATGCTACA

>160\_rnd-4\_family-280\_\_LTR\_\_Gypsy



AGTTAACACTTAAGAATTGCACCAAAAATAACGCTGTATAAGAAACTTGCACAATACTTATATTGACCCATT  
TACAACCAAGCACATTCCGCTGACACATGAGTTCAGCGGCCTGACCGCAACGGTCAGCAGCGGTAACCTG  
ACACTTGACTATGCTGCAAGTATCCGCGTTGTCGCTTATGCCGAGTCGGCTTGCCGACTGTAGCTTTGTAG  
TTTATAGATCCAAGTTTTAGGTATAATTCCAATTCAATTTTATACCACAATTCAGTTTTGTATTTGACGTTT  
AAGAATAAACTTGCCTACTCCGGCACGCTGCCGTAAATATCATTTGTTATATATTACAAAAACATTGCTG  
AGCCACAAGGCCAGTAATTAGCAAAGAGAGTGAAGTCAAACCTCTCCACCGTAATCGTCCTAAATATCGCT  
CGACTTGGCATCGCTGGACCAGCAGATTGATATAAATTGGCGCCCAACTCGTGTTAATAACGAAAGAAAAT  
TACCCACGCGAGCGTTCGTTAATAAAGTGAACACGCTAACAATAACATTACGTGATTGCTGACCTGCGTC  
AATACAGGCAGCAACAGTGAACAACCTTCGCCCTCGTAAAGACACATTGGCAGAAGTGCACCGAGGCCA  
CTGAAGCTATCTGGACAGCGAAGACTGCGGCGTTGGAGCTTAATTCCCCTTTAGTAGTTGTCTTAGAATCA  
TGTAAGTGGGCTTTTCCTTAACTCTTTTCAAGTCAATTCAAAAAGAAATTTAAAAAAAAGCACATTATATT  
TTGCATTACCTATTACTCGATTATAAATCTATAAAGAAAAATAATAATAAAGTTATACGGCATTGAGAG  
CTTTGATTGATAGATAAGCTAGATATTTGTCACTTGTATTTAAAGCAAATTGCAAGAACGCATATTTTGTG  
GGCTTGCTTCCCCTCTATTTCGTTAGTTGTCTTTACGTAACCTTTGTAGTTAAACGCTCTGGCGTAACATGAC  
ACGCCAGCGTAGAGGAACCTCACGCTTAATCATCAAAATATTGAATTGTTTATCTGTAGCGAAGGCATATG  
AGCTCTTCATTCTCACATAACAGAACGCCCGGCCACTGTTCAAGTGACTCAGAATCTGACTGTGACACTCA  
GGCCCTTATTCGCAGACCAAAAAGTGAACCCGTTGTTCCCCCAGCGCCTAGCAACATGAACGCTGAACAA  
CTCAGGGCAATAATGCAGACGGCCATCTCCAGCGCCTTAGCTGAGCAAGCTGCTGCAAACCAACAGAGAG  
AACAAGAGTTAATTCAAAGAATTAACCAAATGTCTGAACAGATAGCGGCTGTGCGCATTACTACGCCAGA  
AGTGCAAACGTATGTGGCCATTGAAATAAACAATGAGATACGCTGCGACGAGCCACTTGACGCCGTCAAA  
TGCTTGCCCGAGTTTACCGGAGCACAGAATCTTATGTGTCTGTGGCGGCAAGCAGCGCTGGCAGCCTATC  
AAATTTTCAAACCATATAATGGCAGTTCACGCCACTATCAGGCGGTTATCATTATCAGAAGCAAGGTCAG  
GGGCCCTGCTGATGCAGTACTAGCTTCGTTTGGCACAGTATTGAACTTTGATGCGATTATAAATCGCCTCG  
ATTTACGTATAGTGACAAACGACCCATCCATGTAATAGAACAGGAGTTAGGCACCTTGAGGCAGGGGGG  
CCTATCGCTACTTCAGTATTACGACGAAGTAGAAAAAAAGTACTTTACTGACCAACAAGGTTAATATG  
TCATATGAGCCAATTATGGCTAAAGGCTTATGCGAAAAATTCGCTGATGACGCATTGCGCGTTTTTATATC  
AGGTCTCAAACGCAACCTCACAGACGTGCTTTTCGCGGCTAAGCCAAAGGACTTACCCTCGGCACTCGCC  
CTTGACAGGAGGTTGAATCTAACCATGAGAGATATGCCTTTGCGGCTAACTACGCTAGAAGCCAGGAGG  
AAAAAGAGCGTAGACCAAGCACTAAAGTGCAGAATAGCCAGCAGGGGGAGCCACAGTCAAAATGGCCA  
GAAAAACCCACACTACAATAAGCAGGCCAGGACGCAAAGCCAAAGCCGATCAAAAGAGCGGCAGACAAC  
AGAATAACAATACGGCACCAAGTGCCCATGGAAGTTGACCCTTCCATATCGAGGATGCTACAGCCCTCACA  
AGCCCTAGCTTATGTAAACAAGAGATCAGCCCAATCTGATCGCACAAAGTGCTCAGAGAAAGCAGCAAAG  
GGTAAACCACGTCGCGCAGGGCGCACCAAGGGGGGTCAGAGTCGTATGCCGGCCGCGGATAGCGCGGCGT  
CGCAAATTGACGACGACGGCGACAGCGATGCTGGTTCNGATGTGCTCAATTTTTTTAGGAGCAAGTCCCTG  
CTACCTCTCATCCGACGAAGAGTAGCGGGGACTGATATGAAATTCCTCATCGATACGGGCGCGTCGAAAA  
ATTTCAATTCGACCATATGAAGGATTAAAAGGCGTTTGCCCGGTTGACAAATTCACAATTCATTNATCCA  
CGGCGAGACACAAATTACACACAAATGCTTTGTTTCGATGTTTCGGGTCAAAGGCAACCTTCTTTATTCTGC  
CGGACTTGTCAACTTTTGTATGGGATCGTAGGCCTTGACCTGCTAACGCAGGCAGCNGCTTCGCTTTGCCTA  
GCTTCAGGACAACCTAAGTGGGGTACGGAGGTGCAACAAATCACCTTCCACACGTGCGCNAACGTAAATT  
TCACAAATGTAGACTGTGCAGAGGCATCCCCATTAGCTAGAAGTTCTTTTTTTGAAAATGCTAAAGACCAG  
ACAAAAGGCCTTTGCAGACCCAGACGAGGCGTTGCCGTATAACACATCAGTCGTGGCTACCATTAGGACC  
ACNGATGAGCAACCGATCTATGCCAAGCTTTACCCATATCCAATGGGAGCAGCTGATTTTCGTTAATAAAG  
AAATCAAGGATCTGCTAAAAAATGATATAATTCAAAAGTCCGTCTCTCCCTACAATAACCCAATATGGGT  
AGTAGACAAGAAGGGCACTGATGAAGCAGGCAATAGGAAAATGAGGTTGGTAATGGACTTTCGTAAACT  
TAACGAAAGAACCGTGCTGACAAATACCCTATGCCAAATATATCAATGATATTGGGGAATTTGGGGAGA  
GCCAAATTCCTTTCAACATTAGACCTCAAGTCTGGTTATCACCAGATCATACTCGCTGAACGCGACCGTGA  
AAAAACCTCTTTCTGTGAACGGGGGGGAAATACGAGTTCAAAAGACTCCCCTTTGGATTAAAGAATGCA  
GCAAGCATCTTCCAAAGAACCATCGACGACATACTGCGAGAGCAGATTGGCAAATCTTGCTATGTTTATG  
TCGATGACGTAATCATCTTTTTCAGAAGATGAGGAATCCACATTAAACACGTGGATTGGGTCTTAAAAAG  
CTTACACGAAGCAAACATGAGGGTCTCCGTGCGAAAAGTCACGTTTTTTTTAAGAAAAGCGTGAACCTTTCTTG  
GTTTCATAGTCACCAGCACTGGCGCCACGACGGATCCTGAAAAGGTTAGGGCAATACAGGAGTATCCAGA  
ACCTAAAACACTGTTTCGAGGTCAGATCATTCTAGGCCTCGCAAGTTATTACAGATGTTTCATTAGGGACT  
TCGCCGCAATAGCAAGACCCATCTCGAATATCTTGAAGGGTGAAAATGGAACAGTCAGTAAGCATAGGTC  
CAGAAATATAAAGGTTCAATTCTCTGAGGTGCAGCAAAGGGCGTTTCAGAAGTTGCGCGATATTTTGTCA

TCCGAGAATGTAATGCTCAGGTACCCCGATTTTAAGAAGCCATTTCGATCTAACGACCGACGCTTCGGGCTCA  
CGGCATAGGTGCAGTTTTGTCTCAAGAGGGTTCGTCCTATAACAATGATTTCAAGAACATTGAAGGACAGC  
GGAGGTAACTATGCAACAAATGAGAGAGAGTTATTGGCCATCGTATGGTCNCTTGCCAAGTTAAGGCAC  
TATCTGTACGGGGCGAAAGACATTAACATCTTCGCNGTTTTCGGAATCCAACCCGAATGCGAAGATTA  
GGTGGAAAGCGCGCATTGACGAGTCTAATGCACGNATNTTCTATAAACCCNGGCAAGGAGAATCTGGTTGC  
GGATGCCCTGTCAAGACAGCACGCTCAACGCTCTGAATGAACAAGATGGGCCGAGTCCTGGACGCAGCA  
ACGGTCCACAGCGAGCTNTCCCTNACCNACACCGTCGAGACAACAGACAAACCCTTGAATTGCTTTTCGGA  
ACCAGATNGTCCTAGAGGAGGCGCGTTTTCCCCCTAAAGCGAAGCTTNATTCTTTTTTGGNAACAAGANACG  
CCACTTGATCAGCTACACTGACATCGAACCGCTNCTAGAAGAGCTCGAAGANGTNGTTTCACCCGAATGC  
GTNAATGCNCTCCACTGCGATCTNCACACGCTNGCAANGNTNCAAGACGACCTTAGTTCGNANNTACCCG  
GCCACAAAATTCTGGCACTGCAAAAATCTTGTGCGAGATATAGCGGACGNANNCGAGCGGTTGGAAAGN  
ANAACACTCCGAGCACAATAGAGCGCACAGGGCAGCNCAGGAAAACATTAAGCAGGTACTCTCGGANTA  
CTATTTTCCNAANATGGCNAGNNTGGCCAAAGAAGTGGTGCAAAACTGCAGGGCCTGCGCTAGGGCCAA  
ATACGATAGGCACCCGAAGAAACAAGAGCTCGGGGAGACGCCGATCCCAAGTCATATGCNNGNGAGATG  
TTGCACATNGACATTTTCTCCACNGACAGGAAACANTTCCTGACCTGCATCGACAAGTTCTCNAAGTTTGC  
AGTCGTCCAACCGGTNCCNTCNAGAACNATNGTGGATNTCANAAGCCGCTCTACTGCAAACTGNTGAACT  
TTTTCCCGNAGCCAGGACAATTTACTGCGACAACGAGCCGCTCNTTGAATTCNGAGACCATCGGACTTCGA  
TGCTCCGAAACGACTACGGCGNTCAGCATTGCGAATGCGCCNCCGCTGCACAGCACCTCGAACGGCCAGG  
TNGAGCGCTTTCATAGCACCTGNCCGAANTNGCGAGATGCCTCAAGNTNGACAAGAANATCAGCGACA  
CCGCAGAANTNATCTTACNGGCTACGATNGAGTACAACAAGAGTTCGATCACTCGGTNACCNNCGAGAG  
ACCAGTTGANGTCGTTTCATGCCGCACCCNGATGAGCCGCAAGGGAACGTACAAAAACAGGCTAATTAGG  
GCACAGCAAGACGACGTCAAACCTAGGTGGAACGCATCNACGGCAGAACNCGCTCTTCGAGGTTAGGNGAA  
AAGGTGTTCCAGAAGAACAACAAGAAGGCTAGGGAACAAGCTAACTCCCTTATGCGCAGAACAGGNGGT  
CGAAGCAGACCTGGGAACGTCTGTCCTCATTAAGGGGAGGGTGGTCCACAAGGACAACCTTGAGGTAATCA  
CCACGAGAATAAGGCCCTTGAAGTTTTTTCTTATAATACCAATCTGTTTAGCCGCTTGGCTCGCTTCTTCCA  
ATTAATTATAAGACTTAGATATTAGCGTGTGCCCTCAGTTTAAGTTCTGGTGGTGGTGGGTAAACAATAT  
TAAACACAAAAATAGCTAAAATTCCCATTCACAGGTTTGAACATAATTCTCATCTTGTCCCTGTCCCTGG  
CTTCGGCGCGCGTCACCGATTATTCAAACGCAAGGTACATCCCGATAGTGGATGGACGAATCCTGGTGTG  
GGAGGATTTGCGCTACATTAAACACTCGGGCAATCTTTCAGAATATGCACGTGTGGTGGAGGAAACGGTC  
AGTTTGCTTGACATGTTCCCAATCTCACATGAAGAAGCTCCTAAAGGTGGACACAGCTCACCTGCAGG  
ACCTGCTGGAAGCGTTGGGCGTACACCATAGGGTGGCTAGAAGTTTGGATCTCCTAGGGTCCATGCTGAA  
AGTAGTAGCAGGCACTACGGATGCCAACGATTTAGAAAGAATAAGATTTACAGAACAACAATAATA  
TGAAACAATAGACAAATAGAGATTAATTCAAAGGTACAAGACCAAGTTAATAAGCTTACAATTACTGTC  
AATCAAATTCTCAAGGCCGCGAAAAACACACAAGTAACACTGAACACTTGTATGAAACGCTATTGGCTA  
GAAATAGGATGCTGATGATGAAATTGCAAAATTTAATGCTTGCAATATCATTAGCAAAAGCAAACATTGT  
AAGCCCGAACATTTTAGACCATATCGACTTGAAATCAGTTTGGCTTGAGGAGCCACCGACACCCCCATA  
GCAGAACTTTTGTCCGTTTCGTCCGTTAAGATACTACAATCGAACAACGCCTTATACTTCATTATTAGGTT  
CCAAAAGTTAAGCTAGCTTGTAAGAAAATCACAATTTATCCCGTCATTCAGAAAGGCGTAATACTGCGAA  
TAACAGACAACACTGTGGCAGAGTGTGATGAACACGTTACGCTCTCGAAAACCTGCACCGCATCCCTTGG  
AGCGACGTTCTGCAGACTCTCAAAGGAAAGCTCATGCGCCAGAGAGCTACACGCCGGGGGGTGGCTAACT  
GCGAAACCCAGCCTAGCAACCTGGAGCCAATTACTCAGGTGGACGAAGGGATGCTAATTATCAACGACA  
AGCTAGCAGAAGTGCAAGTTGATAACGGCCCTAAGACCTGGCTCCACGGCACACACCACATTACGTTTCGC  
TGATCGGGCTAACGTAAATGGAACCTTTTTATATAAACCATATAACATCTTGGATAGAATCCCAGGAACG  
GCGAACTCTCCACTGCTGAACATTACGGCTAGCCGAGATATACTAAGTCTTCCATATCTCCATCTATTGAA  
CGAACGTAATGTGGAGGCAATTCAACAGTTCAGGGAGCAAATCAATGAGGACCGGGCCTACCGAGTTTCG  
TGCATAGCAGGAGCTATCTGTTGCGCAACCGTTTTTATCGGGTTGACACTTTGGCGAATCACCAAGAAGA  
GGAAGACTGCAAGGCGGCTGAGAGAGGTGATTGCCGGCATAGGGTTCGACCGAGGACGGTCATAAACTCG  
AGGGGGGAATAGTTAACACTTAAGAATTGCACCAAAATAACGTTGTATAAGAACTTGACACAATACTTAT  
ATTGACCCATTTACAACCAAGCACATTCCGCTGACACATGAGTTCAGCGGCCTGACCGCAACGGTCAGCA  
GCGGTAACCTGACACTTGACTATGCTGCAAGTATCCGCGTTGTGCTTATGCTGAGTCGGCTTGCCGACTG  
TAGCTTTGTAGTTTATAGATCCAAGTTTTAGGTATAATTCCAATTCAATTTTATACCACAATTTAGTTTTGT  
ATTCGACGTTTAAAGAATAAACTTGCACTACTCCGGCACGCTGCCGTAAATATCATTTGTTATATATTACAA  
AAACATTGCTGAGCCACAAGGCCAGTAATTAGCAAAGAGAGTGAAGTCAAACCTCTCCACCATAATCGTCC  
TAAATATCACTGGAGTAGGCATCGCTGGACCAGCAGATTGATATAATTGGCGCCAGCTCGTGGTAATAA

CGAAAGAAAATTACCCACGCGAGCGTTCGTTAATAACTGAAACACGCTAACAAATACATTACGTGATTGC  
TGACCTGCGTCAATAGAGGCAGCAACAGTGCAACAACCTTTGCCCTCGTAAAGACACATTGGTAGAAGTGC  
ACCGAGGCCACTGAAGCTATCTGGACAACGAAGACTACGGCGTTGGAGCTTAATTCCCCTTTAGTAGTTG  
TTTTAGAATCATGTAAGTGGGCTTTTCGTTAACTCTTTTCAAGTCAATTCAAAAAGAAATTTAAAAAAAAG  
CACATTATATTTTGCATTACCTATTACTCGATTATAAATCTATAAAGAAAAATAATAATAAAGTTATAC  
GGCATTGAGAGCTTTGATTGATAGATAAGCTGCATATTTGTCACTTGTATTTAAAGCAAATTGCAAGAACG  
CATATTTTGTGCGGCTTGCTTCCCCTCTATTTGTAGTTGTCTTTATGTAACCTTTGTAGTTAAACGCTCTGGC  
GTAACATGACACGCCAGCGTACAGGAACCTCACGCTTAATCATCAAAATATTGAATTGTTTATCTGTAGC  
>9\_rnd-1\_family-372\_\_LTR\_\_Gypsy  
TGTAAGTGCATATATGCCCTTACAGAATACCCCGTACTTAAACATAAAGTATGCAGCACTTTGTTGCATACA  
ATAACAATAATATAGTAAACGAGCCCAGAGCCACGTTATGTATTGGCTCGGTCTCATATTACGCAGCGCG  
GTTCACTAGCCTCACTAGCTGACCGTTTATGCTTATGATGCATATCCCACGCTCCGTCTGAGCGCATTCCGT  
GAGCAATATATATGCTCACTAATAACAGGCATATGCGAGCTACTCACTCTCCCTCTCTTTGTAGCTGTTAAC  
GAATAACAGCATAAGTATATATGTATATCCATAGGCTAAGCGAACATTATAACAAGTGAATAAATTCATT  
CTGAACAAAGATACAAAACAGCACTGACGTGCTGACTTATTTTTTCATTGACAATAAGTGCTCATTTTACAT  
GGCGACCGTGACTTGGTCACGCATCCCTGCCTGGAGGAAGTAGACCAAGTGAAAAGGAACCTTCATGGCCA  
ACAAAGAGGCCATGTATAATATACAATTTGAAAAAGGAACCTTCATGATCAACGAGAGGCATCCCGTATTC  
TGAGTGAGTAGAGAGTGAGTGTTATGGTTCATAAACGCGGTGGCTTAAAAAATAAAATTAATAAAAGAAT  
AGCGCACCTAAGGTGGCTGCTATACACAAAACAGCCAACACCCGCATGGTCGACAGCTCAGAAGTTACAA  
AATGAGCTTGACTATCTGCAAAATGAAATTAAGCAGAGAAAACCAAACACCACTACTCAATATATAA  
AAGTTCTAATAAAACCAAACAATAAAGTTACACCCATTGACGCAACCAGCCTACCAAAGAAAAAC  
GAATGTGCCACAGGATTGCGAAGGCCCACTCGACAGCCCCTTCTGCGAATATACGTGCAGACACTGCAC  
AGCCAGCACCTCCAAACATTACATTACAACCAACAAATAAACACCTGTGCGAAGACCAGCACCGGTACCG  
CCAGCGCAACAAGCTGTGCCATCGGAATAAGTGCGAGAGGCACACCGCCACTTGCGCATACGAGGGAGC  
ATCAGCGTGCCACATCCGGCGACGCCAGCTGATGCAACGATGAACAACAGTTGCAGCTATATCCTTAAC  
TACTTTTAATTAATATAAAAAAATTTTTGTAAAATTGAGCGGAAACACTTCCGCCCGATTAGCAGCATAG  
CCCGTAAAGCTATGCGAAATGCTAGGTAGTATTTTGTGTTATAAGAAATATTGAAACCTTGATTCTAAAAA  
CCCAAGTCAACCAGCACTAACGTGCTTTTGTGAAATCATTATTAATCCAAACATTACCAACATATTAAT  
TAAATAGTAATAAATAAACTTAAAAATTGTAATGCCCCGACGACAATTGAGTCGACCGGCAAGACGTTTG  
GCCAGTACAGCCATTTCGAAACAATAGGTAGGAAAAATACAGATTGTAAAAAAAATTTTTAGATGCGTTTT  
AAGCAGAAAACAAACAAGCAAAAACAAAACCCGACTTGTAACAATAAAAAGCATCAAATTCATAAAA  
TATAGTAATAAAACCTCAAATGAACGATACAAACAACAACCTTGCTTTGTAAAGTAAACGAAAACAAATTT  
AACATTACGCATTTGTAAATTTTTTAAGATAATTCCTAAAACCTCAAATGAACGATACAAACAACAATAT  
ATGAATATTAATATCAAAAAGAGGAAATTAAGTTATAATTCGTTTCAGTTTGTACATTAGGTAATTCAA  
AATTATGATCAAGAATTAGCATGATTAAAGACAAGATTAACAAGGTATATAACGACTATACAGACTTTCTG  
TATGCGAGCCATACAAATTTTGCAAAGGCATAGAGAATTCATACCAGTATATGAGTTTCAATACGAATAT  
ATAGAAACATTCGGCACAGTGACAAGTCCACTCTATTCATGTTCTAAAATAGAGNGCGGAATAATCTTGT  
CCACACTACCCTACGTCAAAATAAAAACAATTATTGACGAGCATCCGATTCTAGGGCAGACAACAATTGT  
TTTAGTACGTCTGCATAGGTAGTAGTCAAATCAAAAAGCAAGAATATTTATATAGGAATATGGGGGAAAA  
GAATCAAAGGCAGATGATAACACTGCCAATGTAGTTAACGTAGTAGAAGTCGTAGACACCACTCCCCATG  
TGCAGTTAACAACATACTGCTAATAATACTCATTGTAATAGCTTCAGTAGACATCCTTCTGAAGATTTAT  
CTTCTTCATAAAAATCACTGAGGAAGCGTTACATGAGTCGAGCCAACGACTTAGACAAGGTCTAAGCCAC  
TGCTTAAATAAAAATATTTAAGTAGCGGAAGCTTACATGGACTGGTCCCAAATAGTAGAAAAGATAAAGCG  
GCATAGGGAAAAATTTGATAAATCATACAAGTGCTTAATAAAAAGCGCACCAAGTTTAAAGACCCACCATA  
ATTAAACATACTGAGATCCTTGTATATGAGTACAATGAAATCAGGAGTCTAGTTACCGAGTGTCAAAATA  
AACTGACAAGTTTACACAGAGTCCAAACTTCAGACGTTTTACAGCGTCTAAGGGATAATCTGGTAAACTT  
AAATAAAAAGTATGATCTCCAGCTTTATCTTCCATCGGTGTTAAATACACCGGTAACATTTGATAAGTCAC  
TACTGACAAACGACCAAAATAGAAGATACAAAATTAGTAAACATGGCACAAACAGTTGTAGAATTTATCAA  
GCTAGCCACATCTCTGATACCAGAGTTTGACGGTAAGCCGGAATACTACAAAGTTTTCTAGATTCTTTGA  
ATCTATTAGAAACCTTAAAAGGCACACATGAGCTAACGGCCATAAGCCTTATAAAAACAAAGCTAAAAG  
GCCATGCGAGAAATTTGATAAGTAATGAGCAGACAATTGCTGCAATCATTACGCAACTATCAAATGCAGT  
AAAAGGAGAATCGGTAGAAGTTGTATCTGCTAAGCTTCTTAATTTGCAACAGAAAAATAAAACGGCTAAC  
CAATACACCCAAGAGGTGGAAAAACTGGCAAAGGCCCTTGAAGGCGCCTATATCAGTGAAGGTCTAAGC  
CAATCACTTGCAACAAATACAGCACTACAACAGCTGTAAAAGCTATGACCCAAAATTGTTTCGATTGATA

AGGTAAACTTATCATGCGAGGCAGGCACATTACAAATATGAATGATGCCGTNTCCAAATTTGTCAATAG  
CTGCACGGAGATAACAGGTCAAAGTAACACTGTCCTGTATTATCGACGAGGTGCAAACAATAATAATAGA  
GGAGGCCGAGGTTATAATCGTGGCAGAAATTACAACCACAACAATTATAACCGAGGCCGGTAACAACAAT  
AACAAATAATTACAATAACCGTGGAGGAAGACGAGGCCAAAATAGAGGAAGAGGCCGAGGTAACCTCAAC  
CAAGGTTATAATAGTAACAATGTGAGAATGGCGCAAAATACGCCGGAAAACCTCTCAGAACCCTTTAGGAA  
ACAACCAGTAAATGTAAAGGTTTCATTCCATCAATTACAGTCTTAATATATTTGTCACCTTTTTATAATCATT  
AACTGAAAATAAACTCACATTCCTAATAGATACTGGTGCAGATATCTCACTTTTTAAAAATAAATTCAGAC  
AATTTCAAATTCAGAAGAAAAAATTATAAACATCCAAGGCATAGGCCAAGGTGTAATAAAATCTCAA  
GGAACAACCTTCAATAGAACTTCAATCCACAAAATATATTATTCACACGAATTTCAATTTAGTAGATTCCGA  
TTTTCAATACCGTGTGATGGAATAATAGGCATTGATTTTATTAAAAAATTCAATTGTCAATTAGATTTC  
AACCAAGTGAAGACTGGTTTATAATTAGACCTCAAAATTTAAATTATCCAATTCATGTTCCGATAACATAT  
AGTGCTGGCAACAATACAGTTCTCTTGCCAGCCAGATCCCAAGTAATTCGAAAAATAGACATTAATACAG  
TAAATGATTATATATTTGTTCTAATCAAGAAATACATAATGGAATTTATGTTGCAAATACAATAGCAGCA  
TCCAACATGTATACATTCGCCTTCTAAACACAACCTAATTTTCGACCAATTGGTCAAAGTAAACAAAATCCA  
ATATGAAAATTTAACAGATTACGACATTCATAGCACTAATCCAGAAAATAGAAGCGAACAAGTACTTTCA  
AAATTAAGAAAAATTTTCCAGAACAAATTCAAAAGTCACTAACAGAATTATGCACCAAGTATAGTGATG  
TGTTCGGACTGGAAACCGAACCAATAGCGACAAATAATTTCTATAAACAAACATTAAGACTTAAAGATGA  
TGAACCCATTTATATTAAAAACTACAGAAGCCCGCATAGCCACGTTAAAGAAATTCAAAAACAAGTAGGG  
AAATTAATAAACGACAAAATCGTAGAACCGTCTGTATCCGAGTATAACAGCCCACTCTTGTTAGTTCCGA  
AAAAATCATTACCAAATTCGGAAGAAAAGAAATGGCGATTAGTAATTGACTATCGCCAAATCAACAAAA  
AACTACTTTCTGATAAATTTCCCGCTCCCCAGAATTGATGATATTCTAGACCAACTGGGCAGAGCTAAATAC  
TTTTCATGCCTTGACTTAATGTCAGGTTTCCACCAAATTGAACTTGAAGAAAATTCAAGAAATATAACATC  
TTTTTCAACGAGCAATGGCTCATATCGCTTCACGCGATTACCATTTGGTCTTAAATAGCACCAAATTCAT  
TTCAGAGAATGATGACTATAGCATTCTCGGGTTTAGAACCTCCCAGGCATTCTTTTATATGGATGACTTA  
ATGGTGATAGGATGTTCCGAAAAACACATGATTAAAACTTAACTGATGTTTTTAATGTATGTAGGAAAT  
ATAACCTAAAGTTGCATCCAGAAAAATGTTTCATTTTTTCATGCATGAAGTGACATTTTTTAGGTCACAAATGC  
ACTGACAAAGGAGTATTGCCAGATGACAAGAAGTTTGACGTCATCAAAAATTATCCTGTCCCTCATGATG  
CGGACAGCGCGAGACGATTTGTAGCATTCTGCAATTATTATCGTCGATTATATAAAAACTTCGCCGATTAT  
TCACGGCACATAACTAGATTATGTAAAAAGAATGTTCCTTTTGAATGGTCAAGTGAATGCCAAAACGCAT  
TCCAATACCTTAAAGAAAAGCTTATGCACCCACATTATTACAATATCCTGATTTTCGCAAAGAATTTTGC  
ATTATAACAGATGCCAGTAAACAAGCTTGCGGAGCGGTTCTAACTCAGAACCGTGACGGAATTCAGCTCC  
CAATAGCTTATGCATCTCGTTCATTTACAAAAGGGGAAAGCAATAAGAGCACAAACAGAACAAGAGTTAGC  
GGCAATTCATTGGGCAATTACCCATTTTAGACCATATATTTATGGCAAACACTTTACTATTAAAACGGATC  
ACAGACCATTGACATATCTTTTTTCTATGACTAATCCCAGTTCGAAATTAACCTCGCATGCGGCTAGAGCTT  
GAAGAATACGACTTCACAGTAGAATACCTAAAGGGGAAAGATAATTTTCGTAGCAGACGCACTTTTCGCGTA  
TTAATATAAAAGAACTCAAAGATATGCAACATAAAGTCCTGAAAGTCACTACCAGGCGACAAAGTAGAC  
AAAATAAAAACTGTACAGTAGAAAATTATGAACTTCTGCCAAGGCCAAAGTCATAAAAAATGTATCCAAGCC  
CAACGTACATGAAGTCATTACAAATGATGAAGTACGAAAAGTAGTGACCTTGCGCATAACAGAATCTAAA  
TGTTTTATTTAAACATGGAAATAAAATTATCGCAAGAATTGAAGTTAGCGATTTATATACCAATGGAATTCT  
CGACCTAGGTCAGTTCTTCCAAAGGCTCGAAAAAGAGGCCGGTATATTAAAAATCAGCCAACCTCAAAGTG  
GCACCGAGCGAAAAGATCTTTGAATCAGTTTCAATAGATTCTTTTAAAAATATGGGCAATGAAATATTAA  
AATCTTTAAGAGTAGCGCTACTCCAGCCGGTGACCCAATAAAAGATGAAAAAGAGATACAACAAATATT  
GTCTACATACCATGACGACCCAATTCAAGGAGGTCATAGCGGCATAACAAGAACGCTAGCGAAAAATAAA  
AAGACACTACTACTGGAAAAATATGACACGTCATATAAAAGAGTACGTACGTAGATGTCAAAAATGCCA  
AATGTCTAAAACAAAGACGCACACAAAAACTCCTCTGACTCTCACAGAAACACCTGTGAATGCTTTTCGAT  
ATAGTGATAGTGGATACAGTTGGTCCGCTACCCAATCGGAAAATGGTAATGAATACATAGTCACATTAA  
TATGCGACCTTACAAAATATTTAGTAGCCATTCCAATAAAAAGCAAAAGCGCAAATAATGTGCGAAAAGC  
TATATTCGAAAATTTCACTCAAGTTTGGTCCAATGAAGACGTTTCATCTCGGACATGGGAACAGAGTATA  
AAAACCAGATTTTAACTGATTTATGCAAGTATTTGAAGATCAAGAATCTCACCTCTACTGCATATCATCAT  
CAAACATTAGGGACAATAGAACGAAGTCATCGAACTTTTAAATGAATACATTCGTTTCATACATCTCTGCAG  
ACAAATCTGATTGGGATGTCTGGGTTCAATATTTCACTTATTGCTTCAACACGACACCATCAGCAACGCAT  
GAGTATTGTCCATACGAACTAGTATTTGGCAGACTACCGAAACAGTTCATAGATTTAAACAAAACCTAATT  
ACATAGATCCTATTTATAATTTAGATGACTATTCTAAGGAAATAAAGTTTAGATTAGAAATAGCATACAA  
AAGAGCTAGAATTATGTTAGAAAAAGCCAAGGCTTATAGGAAATTAGCATATGACGAAAAAAAAAAAAA

CTTTGAATTAAAAGTAGGAGATAAAAGTACTTATAAGAAACGAAACAGGGGCACAAATTAGACCCAGTATAT  
TTAGGACCATATATAGTAGAGAAAAATAGAAGATAATGACAACATTTTTNTTAAAGATAGTAAAGATAAAA  
AAAAAAAAGTTCATAAGAATAGATTAAAAATTTTTAATTCTTAATAAAAATAAAAAAATATGACGG  
CCTGATCAACCGAATGAAAAAAACAAATAAACGAATTATAAATTTTTATACCTTAAATAAATTTTTGTATTT  
TTATACTCCAACATTTAAAATTTCTTATTATATAAAAAAATTTTCAATTTTTACAAAAAACCACAA  
TAATTAAGTTCATTTAATAACTACACATTCATAATGTTACGTTATTTCTCTAAAAAGGAGGTGTAGTGCCT  
ATATGCCCTTACAGAATACCCCGTACTTAAACATAAAGTATGCAGCACTTTGTTGCATACAATAACAATAA  
TATAGTAAACGAGCCCAGAGCCACATTATGTATTGGCTCGGTCTCATATTACGCAGCGCGGTTCACTAGCC  
TCACTAGCTGACCGTTTATGCTTATGATGCATATCCCACGCTCCGTCTGAGCGCATTCCGTGAGCAATATA  
TATGCTCACTAATACAGGCATATGCGAGCTACTCACTCTCCCTCTCTTTGTAGCTGTTAACGAATAACAGC  
ATAAGTATATATGTATATCCATAGGCTAAGCGAACATTATAACAAGTGAATAAATTCATTCTGAACAAAG  
ATACAAAACAGCACTGACGTGCTGACTTATTTTTTCATTGACAATAAGTGCTCATTTTACANNGCGACCGTG  
ACTTGGTCACGCATCCCTGCCTGGAGGAAGTAGACCAAGTGAAGGAACTTCATGACCAACAAAGAGG  
TCATGTATAATATACAATTTGAAAAGGAACTTCATGGCCAACAAAGGGGCCATCTATAATATCCAAGTGA  
AAAAGGAACTTCATGATCAACGAGAGGCATCCCGTATTCTGAGTGAGTAGAGAGTGAGTGTTATGGTTCA  
TAAACGCGGTGGCTTAAAAAATAAAATTAAAAAAAGAATAGCGCACCTAAGGTGGCTGCTATACACAAA  
ACAGCCAACACCCGCATGG

>160\_rnd-6\_family-4002\_\_LTR\_\_Gypsy

TAATGGTCGCAATTTTCTNTTTGAATTAAACCGCGTAAGCGATCCTAACAGCTTGCGTTTGTGTAACGAC  
GCTATAGCGATCAGCTTTTGTCTGTACGGTCAGCTGCGAATGATTCTGCCGCTGCTATAAACCGCCTGCG  
TGCACGTTGGCAGCGCAGCTATCTTCAATCTAATCCGCGAAAGAAAAAAGCTCTGAGACCCTATATAAG  
CCTGTAGGTCCCGGATATAACCCTTCTTTTTTCAAAAATTTCTTTACCATCGAAGGTCTGGCTACGGCGGTT  
CGGACATAGCCCCACCAAAAAAATTAACATAAAGCATCAGTCGTTTAATTCGTTGAATTTAAATTCCAA  
CTAAATTGAACCAAAAAACAAAAAATAAAAAAATAAAATAAAGAAAAGGAAAACCCTAAAAGTGG  
CCGATGGGCGAAATATCAATTTTTTTGTTCGTTTGATGATAAACCTTTCGCTACGCCAGCCGGCCACCAGC  
ACCTCACCGGCATATATTTCTTTGTGCCAAGATCTGGTCACTGTTTTAACAGTTCTTGTCTGCCTGCCGAA  
AGTAATTTTTGGAGGAATCAATCTTGCCGCCGCCGTCTCTGACATAAAAACCCACTTATTTTGAGGCAACC  
GCCACGTGTGCCCATTTGGACGGCACTGTAATTTCTTGGGACGGCAATGTCATTTCTGCCCCCATTAATAG  
ACGTCAGCCTCAACTGCGGATCAGCTGCCATTCCCTTGCTCATGCCAGCAAGAACGGGCAGGCGCCGTTT  
CCACAGTCTGGAATCCGGAAGAGGGAGTAGCCTTTTGGGCCCCATTGACGCGCCGCTGATCAGAAGCCCA  
GATGACATCGCCCATTAAGTTGGCCGGAGCGTGCGAGATGCATGAAAATTGCTGTTAAATGTTTTTAGTAA  
AAAAATTGTTAATTAATCTTGTGAGAGACTTCCAAAAGTTTGTGCAAAGTGCATTTATTAGGGCCCTCAA  
AAAACCGCGTGCAAGTGCAGGGAAAAAAGAAAAATTTACATCTATATACATATCTTTATATATATAGAAA  
GGAATAATAGTATAAATCTATCCCCCTTCTTGTGTTGGGGTAGAGTCCAAAGTCATTTCTGAATTTTTTTTATA  
TTTTTTTAATTTTTCCCACTTAGTTTCGGAGAGTATCTTCTAAGTACTCACAATTTAAAAACCCCTCCTGTGC  
CATAATAATATAATCAAAAACAATTTAAAGCCCCACAGAAGACAAAAGAAAACAAATGAAAGANAAAAAA  
AATAAAATTTGCTGCAAACTCTCCGCTGGAAGGCCTTTCATCGAGGAATACATGTAAGTCTGTACCTTTTG  
TTTTGAGTATATTTTCTTATTTTTTGGCACAGATAAGCACAGCCAAGCTGACATGCGCACCTGCTGAGTTTTT  
TTTTTCGACTTTCTGTTTCACATTACGCTTTAGCTCCGATCAATATGTTTATGACCGTGTGAGTCTGGTGAA  
TGCTTATCATCTTTGATTCTACCTACACCCCGCTCAANTATTAGCTGAAACAGAAGCAACCTAAAAGAAAA  
GATTTTTAACAGAATCAAATATATGTACACAAAGATGTATCATCGTATTCAGTATGAGTGGTTGCGCTG  
CGCTCCGATTTGCCCATGCGCTTCGAGCTTAACCTTCTGTTGCCCATATTTTTTTTTTCGACCATAACAATTAAC  
CATCAACTACAATTATATTGACTCTATTATAANAAATTTTTTTTGCTTTTGCCGAATACACTTTAGTTCAAT  
TTACTAATGTCATTTTTTTTTTCTTGCTTAGCCTTATTCTATAAATTATTAATAATGCATTTAGCGAAATTTGA  
GATTTTTCTTTTATTTTGCTCAATAAGAAAAAATAATTAACCTGAATAGTTTATAAAATGAATTATTTTTGA  
AGAATTTTTGAGCCATTGTAAAAATATTAACCTGACTAGTTTTAGTTACTGAATTATTGTTGAATCATTAAT  
GCCACTTGTAATAAGATGCAGATTATCCAACGGAAGGATTCAATTTTCATTGAATAATGCTTTTGTGTTATAA  
TAAATATTAATTACGGATTTTGATTATGAATTGCTAAGTTTTCTTCTGGTGACATGGTGATATAATGTGCG  
TAGAAGAATGTTTTNTTTGGGATCTTCAAAACCTTAAACGCTGAAGATCATGGTTGGGAGGGTATCGAAC  
GCGAGAGTCAGCTTACATCCAAGACTTCGCCTCTTCGGAATATATATGCCCTAATGAAAGCTATCACCATT  
GTATTGGCACTTTAAGTGCTCGTTAAGTTATGCCTGTTTGAGATTTTGTCTTTCGGAGTATCGGTCTCCAA  
TTTAGATTCTGTAGGGATCCTAAAATAAAATTTGTGTATGCAGGTCGAGACATGGCAAAAAGAACCCCCC  
ACCCGAAAGAGCTAGGGAGCAAGAGGATCCCGCCCTGCCATGCTAACTCAACCACGAGGGGCGCTCGGTG  
AATACTTCCCGAATTATTTTGTGAAGATTGGCTGCCAACC GCCGTCACCGTTGCTACCCGATATGTATTGC

TAGAGTAGCTTCACCACAGTACATGCTACATAAAATTTTTGGCGCCCAATCGTGGGGGCCCCGAGGTTGTCTAT  
ATCAAAAAAAAAAAAAAAAAAAAAAAAAATGAGTCTTTATATTATTGTCCACGCACGCTGACGTCGATGTGACTGG  
TTTAGTCTATCTTCCGCATGCGCAGATACTGGTAGTATACAAGATAGTAATTAGGACTACGATGCTTACAA  
TTCAGAGCTTGAATTATGCCGAGAATCTGACCTTACTATATTGTTGAGTGCCTATATATAAACACGACTAT  
AGTTATTAACACCAGCTATACAATCGGTCCCATACATTTGCTCGTTTTCTTTCTTATAATTTTGGAGAAACA  
ACAGATTAGGTTTGCTTATGGTAGAAATACTTTCATATGCAATTTTAGAATACTGCATATTTTGATAAGAT  
ATCAGTACTGATTGCTACTTGATAGCTTGTGGATGGTTAAGTAAATTTTCACTCTTCGTGGAGCCAAAAGTT  
ATAAAATTAGATTGAATGGTTTTGTATTAACGATACTATCAAAGATAGTTAGAATGTTGCCCGGAACTTGG  
CCATATGCTGCTTTGCATATCCTTGCCGAACATTTCTGACTGGATTAAAATGTTGAATGTTACAAACCGCT  
TTCTAAAGTAGTTTCAATAAACAGATAAATTACCTACTTTCATTGAGGCGATTATATTTTCGTAATTAAAA  
AAAAAAAAAAAAAAAAAAAAAAAAAAAACTTCTACTCTATTATGTTACCAAACCAATGTCACGAATCAG  
GAAAACTTAATTAATCATGTTGCCTTTACGCAGCCCAAAAATGTACAGCCGTCGTCAGAGAGAGCTGA  
TAACCACTGTGTTCTATGCCAGTTAGTAATGGACAATACACAGTCTTGCTATTGCACCCCTTGTAGGCATG  
TTTTTCACAACTTTGCTTGGAAGGTTGGTTGGTAAATCATGCTAAATGTCCAGTTGTAGTGCTGTGATT  
GACCCAGCCTCAATTAATTAGTTGTTGGAGATTGCTCGCCGAGAGGAAAACAATCTGCTCCACCTCCAC  
CTACGAACATAGGGAGAACGGTAACGCGCAGTCTAGCAAAATCTCTTNATCCTGGCCCGACCCAGAGTGG  
CGAGAATCCAACAGCAAGGTTATTAGATGTTAGTGATGTACCACAATCAGGACTCGACGCTAGCAATAGC  
ACGAATCCACCTGAAATCGCTCCTGCACGACCAGCTCCTGGTGTAAGAAGAAGAGGAAGACCCACTCAGT  
CCAATAATACCCGCCAAAATCTGGGAGTGGACTATAGGATAATTCAGGAGATGATCGAACAATCAATCAC  
TCGCGTTATGTCATCACTGCAAATGCAAGCAACACCCTTTCCAAGAGTGTTGCCAACCCCGATCCCGGTGT  
CGCCTAGTAGTTCGTCATTCCGAAATGGAAAAATTGCTGACACCATGCAAAAATGGAATCTTAATTTTCGAT  
GGGTCTACCGAAGGATTAGGGGTAGAAGAATTTCTATATAGAGTCAAAACATTGACTGATGAACTTTAG  
ACAGCGACTTTATGGGTCTCTGTAAGCACTTACATGTGCTATTTTTTAGGCAAAGCCCGTGACTGGTACTGG  
CGGTACCACAAGCAGGTAGACCACATAGTCTGGACTGAATTTTGTACTGCACTTCGCCATCAGTACAAAG  
ATTATCGCTCCGATTTTATGAGCAAGGAACTAGTAAGAGCTAGAAAGCAAAACCCTGGGGAATCATTGT  
GTCGTTCCATGACGCTGTAGCGTCACTGATCGATAAATTTGCAATTAAAATTGACGAGGAGGAGTTAATC  
GAAATTTTAAAAAATAATTTATTACCCGAAACCCGACATAAACTGCTATACCAGCCAATAAGTTCAGTTG  
GCCATCTACGTAGATTGGTCCAAATGAACGAGAATTTAGTTTCATGAGCTCAGTTGTGCGCACTGATGGTATG  
AATAAATCCAGGACTATTGGCCGTCGCCAAGTATATGGACTAGAAGAGTCTTTTATTGAACCGGAGGTAG  
AAAATTCAGAAGATACAACTTTGACATCGCAGCAATTCGTAGATGTCATGCCAACTTTAAATGTTGGAA  
CTGCGAAGAGCAAGGGCATCTGTGGGAAAATTGCCTTGCTGACCGCCGTATATTCTGTTACGGATGCGGG  
GCACCCAACATTTATAAGCCCCAGTGCCAAAATGTATCCGTAAAGCTTCGGAAAACCAACAGAAGGGTG  
CATCCAGCAGCAGTCGGATGCCCCCAAAAATCTAATTAATTCCCATACGAACTGTGTATCTGTGGACCGA  
AGCAAAAGCTTGGTCCCTACACCGACTTTAAAGTCACATTCCAACAATTTAGAAATAGCTAAAACCTATTA  
AATTACGATTTTTACCGTATCATGAACGGTTAGCTAATTATTTGCATGTCCGAAATAAGATTTTTTATGAA  
GAAAAACCCCGTATTTCTCAGCGAACGCAGCGCTTGAAAAATTATTATCAAAAATCAAGCAACATAGCA  
AGCTTTTAGTTTCGACAGTTTTTTTGAATCCCACCGATATGCGCAGCTATGCCGAAGTGTCATTTTTAACCT  
TTACCGAGCTTGGTCTATTGGATACAGGCGCGAATATGAGCTGCATAGGTTCTACGCTTGCGCAACAAGA  
TTTTACCGCAATGCCGGAATTTAAGCCTATTAAATCGCATGTCAGAACAGCAGATGGCCATAGTCAGAAA  
GTCATCGGAGTGCTTGAAGTTAAAATGCAGTATAAATCGGCTACCAAGTCCTTGAAACTGTACGTGATTCC  
TTCTATAAACCAAAATCTAATTTTTGGGTCATGATTTTTTGGAGAGCCTTTGAGCTTGCGCCAAGCATTATAA  
ATTCTGTAGAACTAAAATCAATGGAAAAAGAGCAGGAAACAGAGTCGATTGCATACCCTTTAGATAGCCA  
GCAAACGCAACAGCTGCACGTAGTAAAGCAGTTGTTCCCAACGCTGCTGATAGATTAGGCCGCACAACA  
TTGATCCAACACCGTATAGATATAGGAGACGCACGTCCAGTGAAACAAAGATTCTATCCTGTAAGTCCGG  
CCGTAGAAAAGTTGTTATATGCAGAAATTGATCGCATGTTGCAGCTTGGAGTTATTGAGCCGTCTGTAAGC  
GCTTGGAGCTCGCCTATGCGACTCGTCCTTAAGCCCAACAAGGTGCGCCTTTGTCTGGATGCTCGAAGACT  
GAATGACGCCACAAAAAAGATGCTTATCCTTTGCCGAGCATCGATGGCATTTTTTTCGCGGCTACCTAAG  
GCGAAAATAATTTCCAAACTAGATTTGAAAGACGCCTATTGGCAAATAGAACTTTCCGAGGATTCAAAGC  
CTCTCACTGCTTTTACGGTCCCCGGAAGACCGCTATATCAGTTTAAGGTCATGCCCTTTGGCCTTTGTAACG  
CGCCTTCTACCATGTGTGCGTTAATGGACGAGATAATTCCTTCTGACCTGCGCTATTGCGTGTTTGGTTATT  
TAGATGATCTGTGTATTGTGTCAGAAAGATTTTCACTTACATCTGGCGGTATTGGTGCGCATCGCTGAGCAG  
TTTAGAAAAGCCAACCTTGACTTTAAATATTTGAAAAGTCAATTCTGTGTAACAAGTATCAATTATCTTGG  
TTACGTGATTGGTAGCGGAGGTATTTGCACAGATCCGGAAAAAGTAGCTTGTATTGTAAATTGGCCGCCG  
CCAAAAAATTTGAAGCAAGTTCGAGGATTTCTAGGAGTTTGCGGTTGGTATCGTCGGTTTATATGCAACTT

TTCCGATCTCACTTGCCCCATAACGGACATATTATCGACAAAGAAAAAGTTTGAGTGGACCCCTGAAGCA  
CAGACCGCAATGGACAACCTTAAAAACAGTGCTAACATCCTCGCCGGTTTTAAAAAATGCTGACTTTAAGA  
AGAAATTTTTCTTACATTGTGACGCTAGTGATTTTGGCATTGGCGCCGTTTTAGTACAGATGTCTGAAGCT  
AATGAAGAACAACCGATAGCTTTTCATGTCAAAAAAATTAAGCCGTGCGCAGCGAAACTATAGTGTTACCG  
AGCGTGAATGCCTAGCAGTCATATTAGCCATCGAGAAGTTCGGATGTTATTTGGAAGTCCAGGAATTTGA  
AGTGGTTACCGACCATTCTAGTTTGCTATGGCTTATGCGCCAGCAAAATATATCGGGTAGACTGGCACGAT  
GGGTTTTTCAGATTGCAACAATTTAAATTTTCCGTCTCCCATCGGAAAGGCAAAGAACACATTGTTCCCGAC  
GCTTTGTCTCGGTTGCCTGAGAATGAAATCGCTCAATTAGACATGGGTCCTGTAATAGATCTTGAGTCCGA  
TACATTTATGGACGCTAGCTATGTACAAATTAAGACAAATTTTCCCAAAATTTTACTCAGTTTCCGGACA  
TCAAAATCGTTGATAAGTTTTTGTATGTACGCACCGAACATTTCGAGGGGAGACTCGACACCAGAAAGTCC  
TTCATGGAAACTATGGGTGCCTGATCGACTTAAAGTCGATGTGCTCAAACAAGCCCATGACAGCATAACG  
TCGTCTCACGCCGGCATGCAAAAAACCATTGAGAAAAATCCGCAGACATTTGTTCTGGCCAGGATTAGTTA  
AAGATGTACGTGAATACATACGAAATTGCGAGATATGTAAAGAACTAAGGCTCCAAATTATACCTTCG  
GCCACCTATGGGTGCTCACATCCCAACTTGCAGACCATTTCAAAGGCTTTATATTGACCTGCTTGGGCCAT  
ACCCTAGAAGCAAAAGCGGTATGTGGGATTGTTAATAGTCTTAGATCACTTTAGCAAGTATCATTGGTTG  
CAGCCCCTGAAGAAATTCACCTCAGCTGTGATACAAAAATTTCTTCTTGAACAAATTTTTTCATTGTTTTGGT  
GTGCCACAACTATAATAAGTGACAACGGCACCCAGTTCAAAGCTCGTGAGTTCAATGCCTTCTTAGCCG  
AACTTGGCATTGAACATCTGTATACAGCTCTATATTCACCGCAGAGCAATGCTGCAGAACGAGTTAACCG  
CTCAATACTCGCCGCCATTCGCTCGTATTTAAAACAGGATCAGACCCATTGGGATGAACATATTACAGGG  
ATTTTCATGCTCCTTAAGGTCTGCTCTGCACCAATCGATTGGGTGTTCCCCATACCGTGCCCTATTCGGGGTG  
GATATGATCACTCATGGTACCGATTACAAATTATTGAAGGAGTTGTCTTATTGGAAGAACCGCTGGTCCC  
CCTGTTGCGGTCTGACCATTTGGCATTGCTAAGGACAGATATTCAGAAAAACATCAGGAAAGCCTATGAG  
CGCAATGCGGCTCAATATAATTTACGCAGCAAGCCTGTTTCTTTTCGTGAAGGACAGGAGGTGTTCTGTCTG  
AAATTTTGCCTTAGTAAATTCTCACACAATTTTAATGCTAAACTGGCTCCCCAGTTTATTAAATGCCGTGT  
CAAAAAGAACT

>9\_rnd-1\_family-116\_\_LTR\_\_Gypsy

AAAGGAACTTCATGGCCAACAAAGAGGCCATNTATAATATCCAAGTGAAAAAGGAACTTCATGATCAAC  
GAGAGGCATCCCGTATTCTGAGTGAGTAGAGAGTGAGTGTTATGGTTCATAAACGCGGTGGCTTAAAAAA  
TAAAATTAATAAAAGAATAGCGCACCTAAGGTGGCTGCTATACACAAAACAGCCAACACCCGCATGGTCG  
ACAGCTCAGAAGTTACAAAATGAGCTTGACTATCTGCAAAATGAAATTAAGCAGAGAAAACCAAACACC  
ACTACTCACTCAAATATAAAAGTTCTAATAAAACCAAACAATAAAAGTTACACCCATTGACGCAACCA  
GCCTACCAAAAAGAAAAACGAATGTGCCACAGGATTGCGAAGGCCCACTCGACAGCCCCTTCTGCGAATA  
TACGTGCAGACACTGCACAGCCAGCACCTCCAAACATTACATTACAACCAACAAATAAACACCTGTGCGA  
AGACCAGCACCGGTACCGCCAGCGCAACAAGCTGTGCCATCGGAATAAGTGCGAGAGGCACACCGCCAC  
TTGCGCATAACGAGGGAGCATCAGCGTGCCACATCCGGCGACGCCAGCTGATGCAACGATGAACAACAGT  
TGCAGCTATATCCTTAACCTTTTAATTAAATANAAAAATTTTAGTAAAATTGAGCGGAAACACTTCCGC  
CCGATTAGCAGCATAGCCCGTAAAGCTATGCGAAATGCTAGGGTAGTATTTTGTGTTATAAGAAATATTG  
AAACCTTGATTCTAAAACCCAAGTCAACCAGCACTAACGTGCTTTTGTGAAATCATTATTAAATCCAAACA  
TTACCAACATATTAAATTAATAGTAATAATAAAACTTAAAAATTGTAATGCCCGACGACAATTGAGTC  
GACCGGCAAGACGTTTGGCCAGTACAGCCATTCGAAACAATAGGTAGGAGAAAAATACAGATTGTAAAA  
AAAAAATTTTTTTAGATGCGTTTTTAAGCAGAAAAACAACAAGCAAAACAAAACCCGACTTGTAACAAT  
AAAAGCATCAAATTCAATAAATATAGTAATAAAACCTCAAATGAACGATACAAACAACAACCTTGTCTTGT  
AAAAGTAAACGAAAACAAATTTAACATTACGCATTTGTAAATTTTTTAAGATAATTCCTAAAACCTCAAAT  
GAACGATACAAACAACAATATATGAATATTAATATCAAAAAGAGGAAATTAATAAGTTATAATTCGTTT  
AGTTTGTACATTAGGTAAATTCAAAATTATGATCAAGAATTAGCATGATCGAGGACAAGATTAACAAGGT  
ATATAACGACTATACAGACTTTTCGTATGCGAGCCATACAAATTTTGCAAAGGCATAGAGAATTCATACCA  
GTATATGAGTTCGAATACGAATATATAGAAACATTCGGCACAGTGACAAGTCCACTCTATTCATGTTCTAA  
AATAGAGAGCGGAATAATCTTGTCCACACTACCCTACGTCAAAATAAAAAACAATTATTGACGAGCATCCG  
ATTCTAGGGCAGACAACAATTGTTTTAGTACGTCTGCATAGGTAGTAGTCAAATCAAAAAGCAAGAATAT  
TTATATAGGAATATGGGGGGGAAAAGAATCAAAGGCAGATGATAACACTGCCAATGTAGTTAACGTAGTA  
GAAGTCGTAGACACCACTCCCCATGTGCAGTTAACAAACATACTGCTAATAATACTCATTGTAATAGCTTC  
AGTAGACATCCTTCTGAAGATTTATCTTCTTCATAAAAAATCACTGAGGAAGCGTTACATGAGTCGAGCCA  
ACGACTTAGACAAGGTCTAAGCCACTGCTTAAATAAAAAATTTAAGTAGCGGAAGCTTACATGGACTGGT  
CCCAAATAGTAGAAAAGATAAAGCGGCATAGGGAAAATTTTCGATAAATCATACAAGTGCCTTAATAAAA

GCGCACCAGTTTTAAGACCCACCATAATTAACATACTGAGATCCTTGTATATGAGTACAATGAAATCAG  
GAGTCTAGTTACCGAGTGTCAAAATAAACTGACAAGTTTACACAGAGTCCAAACTTCAGACGTTTTACAG  
CGTCTAAGGGATAATCTGGTAAACTTAAATAAAAAGTATGATCTCCAGCTTTATCTNCCATCGGTGTAAA  
TACACCGGTAACATTTGATAAGTCACTACTGACAAACGACCAAATAGAAGATACAAAATTAGTAAACATG  
GCACAAACAGTTGTAGAATTTATCAAGCTAGCCACATCTCTGATACCAGAGTTTGACGGTAAGCCGGAAA  
ATCTACAAAGTTTTCTAGATTCTTTGAATCTATTAGAAACCTTAAAAGGCGCACATGAGCTAACGGCCATA  
AGCCTTATAAAAACAAAGCTAAAAGGCCATGCGAGAAATTTGATAAGTAATGAGCAGACAATTGCTGCA  
ATCATTACGCAACTATCAAATGCAGTAAAAGGAGAATCGGTAGAAGTTGTATCTGCTAAGCTTCTTAATTT  
GCAACAGAAAAATAAAACGGCTAACCAATACACCCAAGAGGTGGAAAAACTGACAAAGGCCCTTGAAGG  
CGCCTATATCAGTGAAGGTCTAAGCCAATCACTTGCAAACAAATACAGCACTACAACAGCTGTAAAAGCT  
ATGACCCAAAATTGTTTCGATTGATAAGGTAAAACCTTATCATGCAGGCAGGCACATTACAAATATGAATG  
ATGCCGTATCCAAATTTGTCAATAGCTGCACGGAGATAACAGGTCAAAGTAACACTGTCCTGTATTATCG  
ACGAGGTGCAAACAATAATAATAGAGGAGGCGGAGGTTATAACCGCGGCAGAAATNACCGCCGCAACNA  
TCGTGGCCGAGGCAATGGTAACTACCAAAACAGAGGAAACAATAACTACGATAACCAGGCGGAGGAAGN  
GGAGGCAANAATTCCGACCAAGAGGCCGAAACAACCAAGGTAATAATAACAACAATGTNAGAGTGG  
CCCAGAACANGCCGGGAAACTCTCAGCAACCCTCGGATATTCAGCAGCAGGAAATTATGCGGTTTCATNCC  
ATCAATCNCAGTCTGAATATATTTGTAAACTTTTNCAATGTGAAGACGAAAAAAACTCGCATTCTTAATA  
GATACTGGTGCAGACATNTCCCTTTTAAAGAAAAATTTCNGATANTTTTCATGANATCCAAGAAGATAAAAA  
NATNAACATCCAAGGCATAGGCCAAGGCGTAATAAAATCCAAAGGACCGACTTCAATAGAGATACAGAC  
AAGTAAATACATNATTCCACACGAATTTTCACTTAGTAGATTTCGCATTTTCGCAATACCNTGTGATGGAATA  
ATAGGCATTGACTTCATTAAGAAATTCAATTGCCAGTTAGATTTCAAACCAAGTGAAGACTGGCTCATAAT  
NAGACCNAANAATCTAAATTNCCCAATTTATGTTCCGATAACATACAGTNCTGGCAACAATNCCGTTCTTC  
TGCCAGCNAGATCCCAAGTAGTCNGAAAAATNCACNCTANCNTCAGATGAATGATNGTGTACTNGTTCCA  
AACCAGGAAATNNANGANGGNATTTATGTTGCAAACACAGTNGCAGCANCCAAAAAATGCATNCGTCCG  
NCTNCTGAACACGACCAGTNCCGACCAAGTGGTCGANGTAAAAAATCCGTNATATGAACCACTTTCGAAC  
TACGACATAGTTCATAAAACTAATCCAGAAAAATAGAAGCGAANAACGTCTTATCTCAATTAGCNAAAA  
ATTTTCCACNACAATTCAAAAACGAAGTGCAGANTTATGCACCAAGTNTAGTGACGTGTTCCGGACTCGA  
AACCGAACCAATAGCNACNAATAACTTCTACAAACAAANACTAAGATTGAAGGATGATGAACCAGTCTA  
CATNAAAAATTACAGAAGCCCNCAAAGTCAAGTAGANGAGATNCAAGTACAAGTAGGAAAATTAATCGA  
CGACAAAATNGTCGAACCGTCTGTATCCCNNTATAACAGCCCACTTTTGTAGTTCCGAAGAAATCNCTNC  
CAGGTTTCNGACAAGAAAAATGGCGATTAGTAATTGACTATCGCCAAATCAACAAAAAACTGCTGTCCGAT  
AAATTCCCGCTGCCTAGAATTGATGACATTCTGGACCAACTGGGAAGAGCNAAATACTTTTCATGCCTTGA  
CTTAATGTCAGGNTTTCATCAAATTGAACTCGAAGAAAATTCAAGAGATATAACGTCTTTCTCAACGAGC  
AATGGCTCGTATCGCTTCACGCGATTGCCATTCCGGTCTNAAAATAGCGCCAAATTCNTTCCAGAGAATGAT  
GACTATAGCATTCTCGGGNTTAGAACCTTCTCAGGCNTTCCTTTATATGGATGATTTAATGGTCATNGGNT  
GTTCCGAAAAACACATGCTCAAAAACCTTAAGTATGTTTTTGAGGNATGTAGGAAATACAATCTNAAGTT  
GCATCCNGAAAAATGTTCAATTTTTCATGCATGAAGTCACATTTTGGGNCACAAATGCACGGACAAAGGA  
ATNTTGCCNGACGACAAGAAGTNCGACGTCATTAAAAATTACCCAGTTCCACATGATGCGGACAGCGCCA  
GACGATTCTGTNGCATTCTGCAACTACTATAGNCGTTTTATCAAAAATTTTCGCCGACTATGCNCGNCACATA  
ACNAGATTATGTAAAAAGGATGTNNANTTCGAATGGNCAGCTGANTGCCAGCACGCNTTCGAACACCTCA  
AATCGGCACTNATGAATCCGAATTTATTACAATACCCNGATTTTCAGCAAAGAATTTTGCATAATAACAGA  
TGCAAGTAAACAAGCATGCGGAGCAGTTCTAACTCAGAACCGNGACGGACTCCAGCTCCCAGTNGCTTAT  
GCATCNNGNTCGTTTACTAAGGGTGAAAGCAATAAGAGCACAACAGAACAGAGTTGGCGGCAATTCAT  
TGGGCAATNACCCATTTTCAGACCATATATTTATGGCAGACACTTCANTGTCAAACGGATCACAGACCAT  
TGACATACTTGTTCNATGGTNAATCCNAGCTCNAACTAACNCGCATGNGGCTNGAGCTNGAGGAGTA  
CGACTTCACAGTNGAATACTGAAGGGNAAAGACAATTTTCGTAGCGGACGCGTTATCGAGAATAACCAT  
CAACAGCTACAACAAATAAATGGATCAATAAAGAAAGTCACTACNAGACGTCAAAGTAGACAAAATTC  
TGCGCAGGAAAAGAAAANTATGAACTTTTGCCANGGCAATCTATAGAAAAAGCTTCNAAGCCCAACGTA  
CATGAAGTCATTAACAATGACGAAGTACGNAAAGTAGTGACCTTGCGCGTAAAAGNATGTNATGTTTTTT  
TAAACATGGTAAGAAAATTACCGCAAGATATGANGTTAGCGATTTATATACCAATGGAAGTCTCGACTTA  
GGTCAATTTTTTCCAAAGGCTCGAAACGCAAGCCGGTATAAATAAAATCAGCCAACTCAAAGTGGCACCGT  
GGGAAAATATCTTTGAACACGTTTCAATNGATAATTTCAAAAATATGGGCAATAAAATATTAANNTCNTT  
GAGAGTAGCGCTACTCAACCCGGTGACCCAAATAGAAACAATAAAAGAAAAAGAGNTCTANTGTCTACG  
TTCCATGACGATCCAATACAAGGAGGTCACACAGGCATCTCAAAAACCTTGGCCAAGGTCAAAGACATT



ATTATTGGAAAGGTATGACNCGAGATATTACTGAGTACGTACGAAAATGTCAAAAATGCCAAAAGTCAAA  
AGTGACAAGAAAAATAAAAACTCCTTTGACNATAACNGANACGCCAATACACGCTTTCGACAGGGT NAT  
AGTAGACACCGTTGGTCCGCTACCCAAGTCNGAAAATGGNAATGAATACGCAGTCACATTAATNTGCGAC  
CTGACNAAATATCTAGTCGCGATTCCAATTCCAAACAAAAGCGCTAACACAGTAGCAAAAAGCGATNTTCG  
AGAATTTTATTCTAAAGTACGGTCCAATGAAGACGTTTATTACGGACATGGGAACAGAATACAAAAATTC  
NATAATAAATGATTTGTGCAAGTATTTACAAATAAAGAACATAACATCAACTGCACACCACCACCAGACA  
GTTGGAACAGTCGAAAGAAGTCACCGAACTTTTAATGAATACATACGTTTCATATATATCGGTTGATAAAA  
CTGATTGGGACGTATGGATCCAATATTTTCGTTTACTGTTTCAACACGACCCCATCTACGGCGCATGACTAT  
TGTCCATACGAACTTGTTCGTTTTCGTTAAAACAAACAATTTATTAAAACATTTTAAATAGCACAGACACCATAGA  
ACCTTTATATAGTATAGATGATTATGCTAAGGAAAGTAAATATAGATTAGAAATAGCATATAAAAGAGCT  
AGAATTATGTTAGAAGAAAAATAAGAGAAATAATAAGGAATTATATGATAAAAAANAANAACATAGATA  
TATCGGTAGGAGATAAAGTCCTACTTAAGAATGAAACAGGACATAAGTTAGATCCAACCTTATTTAGGACC  
CTATACAGTAGAAAAGTTAGAAGATAACGATAATATAATAATTAGGGTACTAAAAAGAAAAAACAAAA  
AGTACATAAGGATAGATTAAAANTTTATAATAATTGAATTGAAAACCTCTAATATAAACAAAGAAAANTGT  
TCGAACAAAATAATACAAAACAATAAAAAAGGAAAATGGAATTTAAGAAAAGGAACTCAAAAAGAAAG  
AAAAATTCTTTTCTTTTATAAAAAAAGACAACATTTAAAANAAAATACTAACACATACATATATTTTTTT  
AAATACACATAGTTAAACATATACATTTACACATACATATTAACAAACATTTTATATTAATAATAATAA  
ACAAAAAACAACAAAAACAAAAATAATTAACATTAATACTTAAAATAACTACATAAATTA  
CGTTATTTTTTAAAAGGAGGGAGATGTAGCATGCGTACATATGTATATACATACATATGAATAAGGCTGC  
AACACTTTGTTGTTATGCCAACAGAATGCAAACATAAGCAGCGACTTTGTGCGCAGCGCGCCTAACGCTAA  
GTGCCCTCTGCGCATATTCAAGTGCAGACGAAATATGATCCGCACTTGATAGCAACGACCGCCCAAATAG  
CTAAGTCAGCGTTCTCACGCTTGACCGTCGCTGTGTATACATATGTGCGCGCATGACTCTCTCTGACTCTCT  
TGCTGTATATAATAAGCCTAAAAACCATGTATGTAAAACGGCTGCTCACTGCTTCACGGTGGACAGCTCTA  
ACTCCAAAAACATTGAATAAAGAACCATCAAGGAAGACTGACGTCTTTTCATCAGGGACTATTATATGG  
CGACCGTGACAGGACTGGATCAGCTCCTGTTTTAGCTGATCGAACCGCTGTATGTACTGTAACATTGAAG  
AGGACGAAGGAGGCAACAACAAGCAAGGCGGAACAAAAACAAAAGCTGAGTGAGTAGAGTGTA  
GTGAGTGTTATGGGTGCGGGTGGCCGGGTAAAAATTGAATAAAGAAATTGCTCACATTANGTGGCAATT  
ATATTCACCCAAAGCCAACACACCGTGGAAGCAACAGCAAGGCTACAGGCCATGCTTGACTTTTATCAG  
CAACAGCTGAAACAGATAAAAGAAAAACCTACACCACATANTCACTCAGTGAATATTAAGTTGTTAAT  
GACAAAACCTATAACCACACCACCTCCCAAAAAGCAAAGTGCCTCAGTACGTCAAGCAATGCCCGGCAGAT  
TGCCCTGGACCTCAGGACAGCCACACTGCAGATCGACTTGCTTGGTAAGGCGGTNACCTGTGCGAAGAC  
CGGCACCGGTTCCGCTGAGCCCATAGGCCCGGGACAACAGCAGCTGAGAAATCAACAAGCGCGAGAGG  
CACCCAGCCCCTTGAGCCNTCGAAGGGAGCGTCAGCGCAACCATACTGGTGATGACCANCTGACGCGGA  
AGAAC

>160\_rnd-6\_family-2274\_\_LTR\_\_Gypsy

ACTGCCAACATTTATACACAACAGCAAAAGCAGCAGAGCAACAGGCAAAAGCTCTGGCAGGTGCTTGTAT  
TAATGATTGCTTAAATTCAGATTTAGCCGCCAAATATAGCACAGCCCAAGCAGTAAAAGCTATGACTAAA  
AACTGCGCTATAGATAAGATAAAACTTATCATGCAGGCAGGCACATTCCATAACATGAATGATGCCATAT  
CAAAATTTGATGGTAGTTGCACAGAAGCAACCGGACAACTAATACTGTCTTTTATTACCAAATTTACTCT  
GATCGTAGTGGAACCGAGGCAGAGGTAATTATAGAGGCCAACCATACAACAGAGGCGTCTACAATAAT  
AACTCTAGAGTCCGTGGCAGCTCGAACCGAGGCCACAACAATAACAATAGAGGCAATGTCAGGGTAGCC  
NAAGGAATTTTCGGGAAACCAACGACCCCCCTCAGGTGCACAGAGCCAATAAATGGCTCAATAAAATTC  
ATAAACCTCAACCTCAGCATTTTTGTCTCTTTTTAAAACGTAGAAACAGTGAAAGAAAAGGTACTTTCATG  
GCACACTTGATAGATACAGGTGCAGATATTTCAATTTTAAAGGAAGGTTCTGATATTCTCAACGACATCCA  
GTTGAATAGCACTATAGACATTCAAGCTATAGGTCAAGGAATTATAAAATCCAAAGGCTTGGCCCAAATT  
GAGCTACAAGCTGATAACTATATAATCCATCACAAATTTGCATATAGTCGATGCGAATTTTCGCGATACTGTG  
TGACGGAATAATAGGCATAAATTTCATAAAAAGTCTTAATTGCAAAATTGACCTAGAACCGTACAAAGAT  
TGGTTTATAAAAAGATTAAACAATATAAATGTCCAAATTTATGTCCCAATAACATACAATTCTGGTAACAA  
TTCAATACTTTTAGCAAGATCAGAAGTTGTCCGAAAAATTGAAATAAACTCAAGTGAAGATAGTATATTC  
ATTCGAAATCAGGAAATTCGTTGCAAACACAGTTTCAACACAAAACAATTAAGAGGTTCTAGTCGGGAGC  
TCCCGACTAGGGGATACCCTGAACCCTATTCTTCCAACCTACAAATGCATATATATATTCTATTTTAAAAGC  
TATATTTCAAGTTCGGTGACTCTAGCTCTTATTATTTACCAAATTTGTCCAAAAAACAGGATATCGATGTC  
GATTTTTATCGATTGCTTGGAAACGGAGTAAGTTATCGATTATCGGAAACAAAGGTGTAACATTTAAAAA  
TCAGACATTATTTACCCGAGATATTAAAAAAAATCATCGAAAAAGTTTCGATTTTTCGACCCGACCTCGAT

TTTGAAAAAAGCGTGATGATTTGGAAGNTCATATCTCCGCGCGGAGATTTTGAAAGAAAAAACC  
TTTTGTCGATTTGGGTCAAATTTGGATNTTCATATTTTGGATGCCAATCGTTAGAACTGATCCTTACGAGT  
CAAAAATGGTATAAAATTCAAAAATCGGACATTATTTGACGGAAATATTCCAAAAATCATCAAAACAGG  
TTGACTTTACGAACGAATCGGTTTTTTGTCAACAACATTTTNAACCCATCGATGTTTAAANTGTTTGAATG  
CCAATTGATGGTAGGGATCCGTACGCATTCAAAAAGGTATAACATTTTAAAATCAGACATTATTTACCCG  
AGATATTAAAAAANATCATCGAAAAAGTTTCGATTTTCGCGCCGACCTCGATTTGGAAAAAAAGCGT  
GATGATTTGGAAGNTNATATCCCCGCGCGGAGATTTTGAAAAAAGCGTGCCATTTTGTGCGATTCG  
GGTCAAAATTTTGGATATTCCTATTTTGGATGCCAATCGTTAGAACTGATCCTTACGAGTCATAAAATG  
GTATAAAATTCCAAAATCGGACATTATTTGGCGGATTTGATNCCAAAATCATCAAAACAGGTTGACATTT  
ACGAACGAATNGGTTTTTNGTCAACAACNTTTTAAACCCATCGATGTTTAAANTGTTTGAATGCCAATTG  
ATGGTAGGGATCCGTACGCATTCAAAAAGGTGTAATATTTTGAAACCAGACATTATTTACCCGAGATATT  
AAAAAATATCATCGAAAAAGTTTTGATTTTCGAGCCGACCCCGTTTTGGCAAAAAACGTGATGTAACCC  
CTTGCCATTTGGTCAATTTTGGTCAAAATTTAGATATTCATATTTTGGATGCCAATCGTTAGAACTGATCCT  
CACGAGCATAAAATGGTATACAATTCCAAAATCGGCAATTTTTCGGCTGAGATATTACAAAAAATCATCA  
AAACAGGTTGACCTTACAATCGAATGGGTTTTTGGTCAACAACCTTTTTTAGCCCATCGATATTTAAAATG  
TTTGAATGACAATTTGTAGTAGGGATCCGTACGAATTNAAAAAGGAACTNTAATATTTTGACAGAAANNA  
GTATANTANNACCCGTANANATTCAAAAAACGTAATATTTGAAACAAGTTTCGATTTTCGCACCGAC  
CTCGATATTAAAAAANATCGTCGAAAAAGTTTCGATTTTCGCANCGACCTCGATTTGGA AAAANGTCGT  
NATGGAANGTCATATCTCCGCGCGGAGTTATGTCGTTTTGGAACGTCATATCTCCACGCGGAGTTATGTCG  
TTTTGGAACGTCATATCTCCGCGCGGAGTTATGTCGTTTTGGAACGTCATATCTCCGCGCGGAGTTATGTC  
GTTTTGGAACGTCATATCTCCGCGCGGAGTTATGTCGTTTTGGAACGTCATATCTCCGCGCGGAGTTATGT  
CGTTTTGGAACGTCATATCTCCGCGCGGAGTTATGTCGTTTTGGAACGTCATATCTCCGCGCGGAGTTATG  
TCGTTTTGGAACGTCATATCTCCGCGCGGAGTTATGTCGTTTTGGAACGTCATATCTCCGCGCGGAGTTAT  
GTCGTTTTGGAACGTCATATCTCCGCGCGGAGTTATGTCGTTTTGGAACGTCATATCTCCGCGCGGAGCTA  
TTACCCGAGATATTA AAAAATATCATCGAAANAGTTTTAATTTTCGAGCCGACCCCGTTTTGGCAAAAA  
ACGTGATGTAACCCCTTGCCATTTGGTCAATTTTGGTCAAAATTTAGATATTCATATTTTGGATGCCAATCG  
TTAGAACTGATCCTTACGAGCATAAAATGGTATACAATTCCAAAATCGGCAATTTTTCGGCTGAGATATTA  
CAAAAAATCATCAAAACACGTTGACCTTACAATCGAATGGGTTTTTGGTCAACAACCTTTTTTAGCCCATC  
GATATTTAAAATGTTTGAATGACAATTTATAGTAGGGATCCGTACAAATTCAAAAAGGTGTAATATTTGA  
AACCAGACATTATTTACCCGAGATATTA AAAAACATCATCGAAAAAGTTTCGATTTTCGCACCGACCTC  
GATTTAAAAAATCGTGATGGAAGGTCATATCTCCGCGCGGAGTTATGTCGTTTTGGAACGTCATATCT  
CCACGCGGAGTTATGTCGTTTTGGAACGTCATATCTCCGCGCGGAGTTATGTCGTTTTGGAACGTCATATC  
TCCGCGCGGAGTTATGTCGTTTTGGAACGTCATATCTCCGCGCGGAGTTATGTCGTTTTGGAACGTCATAT  
CTCCGCGCGGAGTTATGTCGTTTTGGAACGTCATATCTCCGCGCGGAGTTATGTCGTTTTGGAACGTCATA  
TCTCCGCGCGGAGTTATGTCGTTTTGGAACGTCATATCTCCGCGCGGAGTTATGTCGTTTTGGAACGTCAT  
ATCTCCGCGCGGAGCTATTACCCGAGATATTA AAAAATATCATCGAAANAGTTTTAATTTTCGAGCCGACC  
CCGGTTTTGGCAAAAAACGTGATGTAACCCCTTGCCATTTGGTCAATTTTGGTCAAAATTTAGATATTCAT  
ATTTTGGATGCCAATCGTTAGAACTGATCCTTACGAGCATAAAATGGTATACAATTCCAAAATCGGCAATT  
TTTCGGCTGAGATATTACAAAAAATCATCAAAACANGTTGACCTTACAATCGAATGGGTTTTTGGTCAACA  
ACTTTTTTAGCCCATCGATATTTAAAATGTTTGAATGACAATTTATAGTAGGGATCCGTACAAATTCAAA  
AAGGTGTAATATTTTGAAACAAGACATTATTTACCCGAGATATTA AAAAACATCATCGAAAAAGTTTCG  
ATTTTCGCACCGACCTCGATTTAAAAAATCGTGATGGAAGGTCATATCTCCGCGCGGAGTTATGTCGTT  
TTTGGAACGTCATATCTCCACGCGGAGTTATGTCGTTTTGGAACGTCATATCTCCGCGCGGAGTTATGTCG  
TTTTGGAACGTCATATCTCCGCGCGGAGTTATGTCGTTTTGGAACGTCATATCTCCGCGCGGAGTTATGTC  
GTTTTGGAACGTCATATCTCCGCGCGGAGTTATGTCGTTTTGGAACGTCATATCTCCGCGCGGAGTTATGT  
CGTTTTGGAACGTCATATCTCCGCGCGGAGTTATGTCGTTTTGGAACGTCATATCTCCGCGCGGAGTTATG  
TCGTTTTGGAACGTCATATCTCCGCGCGGAGTTATGTCGTTTTGGAACGTCATATCTCCGCGCGGAGTTAT  
GTCGTTTTGGAACGTCATATCTCCGCGCGGAGCTNTTACCCGAGATATTA AAAAATATCATCGAAANAGTT  
TTAATTTTCGAGCCGACCCCGTTTTGGCAAAAAACGTGATGTAACCCCTTGCCATTTGGTCAATTTTGGT  
CAAAATTTAGATATTCATATTTTGGATGCCAATCGTTAGAACTGATCCTTACGAGCATAAAATGGTATACA  
ATTCCAAAATCGGCAATTTTTCGGCTGAGATATTACAAAAAATCATCAAAACAGGTTGACCTTACAATCG  
AATGGGTTTTTGGTCAACAACCTTTTTTAGCCCATCGATATTTAAAATGTTTGAATGACAATTTATAGTAG  
GGATCCGTACAAATTCAAAAAGGTGTAATATTTTGAAACCAGACATTATTTACCCGAGATATTA AAAA  
CATCATCGAAAAAGTTTCGATTTTCGCACCGACCTCGATTTNAAAAAATCGTGATGGAAGGTCATATCT

CCGCGCGGAGTTATGTCGTTTTGGAACGTCATATCTCCACGCGGAGTTATGTCGTTTTGGAACGTCATATC  
TCCGCGCGGAGTTATGTCGTTTTGGAACGTCATATCTCCACGCGGAGTTATGTCGTTTTGGAACGTCATAT  
CTCCGCGCGGAGTTATGTCGTTTTGGAACGTCATATCTCCGCGCGGAGTTATGTCGTTTTGGAACGTCATA  
TCTCCGCGCGGAGTTATGTCGTTTTGGAACGTCATATCTCCGNGCGGAGTTATGTCGTTTTGGAACGTCAT  
ATCTCCGCGCGGAGCTATGTCGTTTTGGAACGTCATATCTCCGCGCGGAGCTATTACCCGAGATATTA  
AATATCATCGAAAAAGTTTTAATTTTCGAGCCGACCCCGGTTTTGGCAAAAAACGTGATGTAACCCCTTGC  
CATTTGGTCAATTTTGGTCAAAATTTAGATATTCATATTTTTGATGCCAATCGTTAGAACTGATCCTTACGA  
GCATAAAATGGTATACAATTCCAAAATCGGCAATTTTTCGGCTGAGATATTACAAAAAATCATCAAAACA  
CGTTGACCTTACAATCGAATGGGTTTTTGGTCAACAACCTTTTTTTAGCCCATCGATATTTAAAATGTTTGAA  
TGACAATTTATAGTAGGGATCCGTACAAATTCAAAAAGGTGTAATATTTTTGAAACAAGACATTATTTACCC  
GAGATATTAACAAAAACATCATCGAAAAAGTTTCGATTTTCGCACCGACCTCGATTTAAAAAAAATCGTG  
ATGGAAGGTCATATCTCCGCGCGGAGTTATGTCGTTTTGGAACGTCATATCTCCACGCGGAGTTATGTCG  
TTTTGGAACGTCATATCTCCGCGCGGAGTTATGTCGTTTTGGAACGTCATATCTCCGCGCGGAGTTATGTC  
GTTTTGGAACGTCATATCTCCGCGCGGAGTTATGTCGTTTTGGAACGTCATATCTCCGCGCGGAGTTATGT  
CGTTTTGGAACGTCATATCTCCGCGCGGAGTTATGTCGTTTTGGAACGTCATATCTCCAAGCGGAGTTATG  
TCGTTTTGGAACGTCATATCTCCGCGCGGAGTTATGTCGTTTTGGAACGTCATATCTCCGCGCGGAGTTAT  
GTCGTTTTGGAACGTCATATCTCCGCGCGGAGCTTTTACCCGAGATATTAACAAAAATATCATCGAAATAGTT  
TTAATTTTCGAGCCGACCCCGGTTTTGGCAAAAAACGTGATGTAACCCCTTGCCATTTGGTCAATTTTGGT  
CAAAATTTAGATATTCATATTTTTGATGCCAATCGTTAGAACTGATCCTTACGAGCATAAAATGGTATACA  
ATTCCAAAATCGGCAATTTTTCGGCTGAGATATTACAAAAAATCATCAAAACAGGTTGACTTTACAATCG  
AATGGGTTTTTGGTCAACAACCTTTTTTTAGCCCATCGATATTTAAAATGTTTGAATGACAATTTATAGTAG  
GGATCCGTACAAATTCAAAAAGGTGTAATATTTTTGAAATCAGACATTATTTACCCGAGATATTAACAAAA  
NATCATCGAAAAAGTTTCGATTTTCGCACCGACCTCGATTTANGAAAAAATCGTGATGGAAGGTCATATC  
TCCGCGCGGAGTTATGTCGTTTTGGAACGTCATATCTCCACGCGGAGTTATGTCGTTTCGGAACGTCATAT  
CTCCGCGCGGAGTTATGTCGTTTTGGAACGTCATATCTCCAAGCGGAGTTATGTCGTTTTGGAACGTCATA  
TCTCCGCGCGGAGTTATGTCGTTTTGGAACGTCATATCTCCGCGCGGAGTTATGTCGTTTTGGAACGTCAT  
ATCTCCGCGCGGAGTTATGTCGTTTTGGAACGTCATATCTCCGCGCGGAGTTATGTCGTTTTGGAACGTC  
TATCTCCGCGCGGAGCTATGTCGTTTTGGAACGTCATATCTCCGCGCGGAGCTTCCCGAGATATTAACAAA  
TATCATCGAAAAAGTTTTAATTTTCGAGCCGACCCCGGTTTTGGCAAAAAACGTGATGTAACCCCTTGCCA  
TTTGGTCAATTTTGGTCAAAATTTAGATATTCATATTTTTGATGCCAATCGTTAGAACTGATCCTTACGAGC  
ATAAAATGGTATACAATTCCAAAATCGGCAATTTTTCGGCTGAGATATTACAAAAAATCATCAAAACACG  
TTGACCTTACAATCGAATGGGTTTTTGGTCAACAACCTTTTTTTAGCCCATCGATATTTAAAATGTTTGAATG  
ACAATTTATAGTAGGGATCCGTACAAATTCAAAAAGGTGTAATATTTTTGAAACAAGACATTATTTACCCG  
AGATATTAACAAAAACATCATCGAAAAAGTTTCGATTTTCGCACCGACCTCGATTTAAAAAAAATCGTGA  
TGGAAGGTCATATCTCCGCGCGGAGTTATGTCGTTTTGGAACGTCATATCTCCACGCGGAGTTATGTCGTT  
TTGGAACGTCATATCTCCACGCGGAGCTATGTCGTTTTGGAACGTCATATCTCCACGCGGAGTTATGTNGT  
TTTGNAACGTCATATCTCCGCGCGGAGTTATGTCGTTTTGGAACGTCATATCTCCGCGCGGAGTTATGTCG  
TTTTGGAACGTCATATCTCCGCGCGGAGTTATGTCGTTTTGGAACGTCATATCTCCGCGCGGAGTTATGTC  
GTTTTGGAACGTCATATCTCCGCGCGGAGTTATGTCGTTTTGGAACGTCATATCTCCGNGCGGAGTTATGT  
CGTTTTGGAACGTCATATCTCCGCGCGGAGTT

>Ref\_dvir\_765

TTTAGTTTTTTTTTAGTTTTTTTTAAGTTGAGTGCATCCGAGCACAATATATGTCAGCAGTGGAATGAAATT  
CCTCCGTGACTTGTTTTATTCTTTTCCATTACTTTCACTTTAGCAACATATAAGAACATTATTTGGCCATAG  
AATGTGTCTGTATTGAACTTACGTACTAAATACAATAAATACTTATACTAAAATACTAAAAGACTAAAAG  
TACTAATTCCCTAATAATACTAAATTGCTTTAACAACCTTAAAACTGTCAGTGTGGCAACACTGCATAGGTG  
GCAACGCTACGCAATATACAGTTAGATTTGACTACATGTGCTCTGCATATACATTTTTTTTTTTTTTCCCGTC  
GCAACGTGGAATCGAAAACTTTTTAACAGAGGTAAGTCGCATTTTTTGCAAAAATTAATTTCTTAACATAT  
AACTAATTATAAATATTTCTTTTTACAGATTTATGTCGAAATTGCTATCAGATTTGATAATTGCGCTCAGAG  
GTCGCGCTTTTCTATGCGCCAGGCGCCGCCAGCCATGTACAGGCCGCCACACAGGCGCCGACGCATTCAT  
TTGCTGATGCGCAATAAGCCTCGCATGGGCATTTGACCGCATCCGACGACGCCTCCGCTGGCTTATTGGAT  
TGTGCTGCCGCTTCTTATGGACACCACTATGCAGACAGGAGTCGCTGCATATAAAAGTGTCGTGCACATG  
GTGTGCATTTTGGATTCCATATGGGCCACGCTCAGTCGGCCAGTTTGGACTTCTTCGAGGCCGGAGCATGG  
CCATTGACCATTGCAGCTCCGTCTGCAGGGGCGCCCGCACGAGTTCCGCGTGTGCTGGGAGGCAGGTACG

TGCTTTTTTCCTACATTGCGGAGTCCGTCTAAATTGCCTTTTTTCGTTTTTCAGGTATGGCTGCTGTGAAAAA  
CATCGGATATGGCCAGCCACAGCCAGTGCCTCTGGCCGATACGCTGCTGCTGCCACTGCCGCTTGTCAGC  
AGCTCATCTTGAGCGGCCCTTGCAAGTCGCCTCCGAATTGACGCCATTTGGTAAGTGCATCTACGTTTTGC  
AGGCAGCATTAAATTCTCAACCTTTTCGCTTTACAGGCGTCGATTGTCGTTGCTGCAAATCATGCTCGGTCA  
TCGATGGCGGCCGTGATGGCCAGGCTGCCCCCGCACAGGCACCAAGCTGCATTTCCAGCTTCTCAGGGGG  
GCCAGGCTCCATCAGCTGCTGCGTCGTTGGACATCTGTCAACCAGGCGCTCCACAATGAGCCCAGGCAAA  
TCCAGTGGCAACTGCACGGAATTTGTATTGTTTTGCCGCCGCTCAGGAAGCGAATCAGGCTGCAGTTGCTG  
CTGCATCGTTGGATGGACATAGTTATGCCACCGCGGAGAAAGCGGGGCCAGGCTGTACTATATAGACCAGCGAGGGA  
TATAAGTTATTTTGCCGCCGCATGGAGAGCGGGGCCAGGCTGTACTGAGTGTACCAACGAGGGATTCAATT  
CAGCCTTCTTCTGCAGGTAAGTTGACAAGAACAATTCAAATTCATCATTATCAAAATCACTATCATTATCA  
TTGTTTACATTGTTAGTATTAGTAGCATTGTATTGTTAGTGCTGCTGCCGCATAGCCGTTGGCCATGCTGC  
ATTTGCAGCTCATTGTATTAGCTGCACTGACTCATTGTCTGCGAGCCGCTGCTGCATTTCAATTTGAATA  
TTATTTCTGCAATAATGAGCGCTTCATCCATCTCCTGTCCCAGTGCCTGCTCCAACATATCAAGGCTGCG  
CTCTAGTTGCAATTCATCGGTATCTATAGCCGATTGTATTATGGCCCCCTGGGGCCGGCTCTGCCGTCGGTA  
TTAGTTCCTGATGCTGCCGCTGCAGGTGTTTCGTGCTGCAGCTCAGGTAGAATTAGCCATTGTATCTGTGGT  
GGCTGGTTGTCGATTAGCAGCATTAAAGTTTTTCGCGAGTTATTGTGCCCGCTTTAAGTTTGCAGCAAGCAT  
GTTTATTGGCATTTCATCAAAGCGTTTTGTTCCCACTCGGCAAGCATAGCGGCCCTCCTTTCAGCCTCTTGCT  
CATCTTCTTCTAGCTGCAGCAGCGTTGGCAACCTCTCCTCAGCTACCTCTCTCTGCTGTGTTAACTGCTGCT  
GCCGTAGTGGCGCCATGCATCTATCCAATTGCTCCGTGTACCTGGGCCTTAGTAGCCGCACTGGTATAAAT  
GGCTCTAGTATCAGTTTTCCGAGCTTCAATGTTTCGGATGACAGCTTAGTGACTTCAAATCTATCGCTAGCCA  
ACTGATATACTTATCTACGCTTTTTATCCCATACGTATCCCTCTTGATACCAACTGGCATTTCATGCATGCC  
CGCAAGATTTTATTCTGCATTGTTTCTATCCTTTTTTATTTGCGAATTTGATACCAGTGCTCCCCATACAGGA  
AGCGCATATTGCCATATAGGTGCGATCAGCTGCTTATATACCACAGCCTTGCAATTTCTAGCTAGCCTACT  
ATTTTTTCCCAGCAACCAGTCCAGCTTTTTGTGTACTCCACGCAGCCTTATGCAAAGCTGAGTTATGTGTAT  
ATTCAGTGTGAGTTTTCTATCCAATACTAAGCCCAAGTATCGGTGCCGCCCGTTATTTTCGATCGTTTGTCC  
ATTTATCATTGGACACAGCCTTACTAGTGTTGCATCCAGCCTCCGCGTGCTAAACATTACATGCGCTGTTTT  
GCTACTATTTATCTTTATGCACCATTTCTCTGCCCAACGCATCAAATGTATTAAGTATTTTTCATTTAGATT  
CACTGCCTTTCATTACAAGTCTAGGTAGTGGCATGTCTGAAGAAAATATTGTATATAGTATAGGCCCGAGC  
ACACTGCCCTGGGGTACGCCTGCACACACTTTTTCCAGGCCTTGACTTTATGCCGTCGTTGCATTTTACAAT  
AAATATTCGCTCAGCCAAGTAGCTTTCCAGCACGTTGTACAGTGCAAGTGGTAGCAATTTTATTAATTTTA  
CTAATAGCCCAGCGTGCCATACACGGTCAAACGCTTCGCTGATATCAATAAATACAGCCGAGCAATATTG  
TCGCTTCTCGTAAGCATTCAATATATATTGAGTCACACGGGCCAGCTGCTGCTCGGTACCATGGTCTTTTCT  
GAACCCAAATTGGTGGCTTGGTATAGCATTTGCAAACCTCTTTGCATTTCGAATAGCCTATTCAGCAGCAGTT  
TCTCAAACAATTTTGAGAAACCTGCTAGTAGACTAATTGGTCTATATGACGATATCTCTCCTGTACTTTTAC  
CAGGCTTTAATATCATACTGATCTCTGCACATTTCCATTGCCTAGGAAAAAACCCATACCTCAATATACAA  
TTGAATATAAGTACTAAGTATATAACCGCCTTCTCAGGCAACGATTTAATAACCCTATTGTCAATATTGTC  
CATGCCAGGAGACTTATTTAACTCTAGCATATCTATCTCTAGCATAGTCTCGCTAACACTTATCGGACGAA  
ATGGCAGAACGGACATACTATCTGTATTCTCTTCGAATTGCTCCAGCTTTTTTCGCTTTAGCTCTAATAGCT  
CATCTGCAATCAGGTTACGCACAACCTGTGTATTGTGTCAGATTGGTGTGAAGCGTTTCTCCAAATGACAT  
GCAAACGCTTCAGCCTTCTCCTCATTACTTCGTGTCCACGTTATATTGCCGTTTCTCCTACAACACTACTGCCA  
CTAGCTATCTCTAACTTTAGCGGCCAATTTGGTTGCGGCTGCCTTTTCAAATTATTTGTTAGCCTCCATAAT  
TTTTGCATTTTATAGCGATCCTGAACATCAATCTGCTTCAATAACTCATTTCATAGTATTTCACTTTTGACAGA  
CATAGCTCTTTCTTTAGCCGATTTTGTACTTGTCTATACATTTTTCTTGCAATTCGGACAACGCAAAAGCATT  
AATTGCCTTTTATATACCTGCTTCATCTTTATCAGCCCTCGTAAGTGCCCATTAAGCCTATATTGTCCGCTA  
TTTCGTTTCGTCCGTACAGTTTATCCTGCCCATGCCGATGTTTCTCGTATTGAGTCTGCTGCTGCCTCATATA  
AATTCTTATTTAAGAAGTCAAAAGCGTCCTCTATATCGGCGCCTGATCTTATCTCAATGTTTAGCAATATG  
CGTCGATTTAAGTACTCTTGGAACTTTTTTATGTTTCGCAATTCAGTGGCAGCAATATTTTACGATTTCTTTT  
ATCATATTAGCAACATTTAGCCCTTCTATGCCCATTTCAATATGAACAGGCAAGTGGTCCGAATCTAAGTC  
TGTCGTCGTATACGTTCTTAGTCGCGCATTTTGTAGTCCGCCATATACGGCAAAGTCAATTGCCGACGGCA  
TTTTCCGCCTGTCATATGGATAGTGAGTGGCACCGCCGGTAGCTAGGATATTATAGCGCCTATTCTTGTGT  
ACGCTATCCATTAGCGCCTTCCCGCGTTTGTCATCCTCGTATATTGCCCCACCAGGTATGCTTAGCGTTCCAA  
TCCCCACATAGCATAAAGCCAGATGAGCCATTGCATCCATCGTCTATGTGTTTGAATAGCCTGCTAAATTG  
CTCTGAAGACCATTTAGGCTGTGGTGGGCAGTATATAGCTGCAATTATTATTCTATTTTTATTCTCTCGCT

ACTCATCAAGGCAATTGGAGCACACTGCATAAAATTTTCCGATATTGGCTGCAAAGCGATATGCTTAATAT  
CATTTTTAACTAAGATTGCTACACCTCCACTTTTGTAGTTATCTGGATGGGTAGCAAAGTATGTGAGGTAC  
CCATTAATCTTCAAAACATTCGAGCTAATAATTGTATTTGCGCTAGTATTAATACGAGTCTCTATTATCATC  
ATTATATCAATTTTGTGGCGTTGGATAAACAGTTCTAATTCTAGTAACTTATCCCCACCCCTGCAGCATT  
CAGTAGGCAATCCTAAAGGGGCTGCCTACCTGATTGCCGCTATATGCATCTAAGTTGCTATTAGTGGTAGA  
AGTTGTATTCAAATTATTAGGGGCTACTATTCAGATTATTCATTATTATTCGTGTCATTGGCTTCATACATAG  
TGTGGCTGCCTGCCATTTGACAATCGCTATCAATAGGTCTATTTTCTACAATGGTACTATTCTGTATAGGCA  
TGGGCATATGTAATGGTTGGGCATTTTTAAACGTATTGGCGACAAATTTAAATAATACATTTAGTAAATTA  
TCAATCTTTTTACCCATCTCCTCGACGATATTGGCGTTCCGCTCCAACGCTCTCATAAGCGGACAATCAAT  
CTGCGGAGTTTGGTGTTGCTGCTGTTGTTGTGATTGCTCGTTGTGTGTTGGCACCTGTACAATTCGCGTGGG  
CTGTTGTTGTTGTTGTTGGGTTTGTGACTTGGGAAGCGCTGCTGTTGGTTTTGGATACGCTGCTGCTGGTT  
TTGGTTGCGCTGCTGCTGCTGAGGATGGCGCTGCTCTTGATGGCGCTGCTGGATTTGGCGATAGTGTTCT  
GTTGCTGCCACGGATGTTGTTGTTGCTGCCGTTTTTGCTGCTGCTCCATACGAAGCTGCTCCTGTAGCTTTT  
CAAGATGCCTTGATGCAGGATTACGGATTTTAACACCACCAACACCACGGGCTACTTGGCTGTATGTCATA  
CTTTTTGTGTTTGGATTTGTATTCGGGTTTGATCTCTGCTGAGACGCCTGCTGCCGTATTGGAGACTCCGGC  
TGACGTTGCTGCTGCTTTGGAGCTTTTGTGTCACCGTACCGTTGACTTGCATATTGTTCCGGCAGCCGTTGCT  
GTTGTACGTTTCGTTGTCGCTGTGTGTTATCATCGTTGCATTGCTGTTGTTGCTGATTACTACTTGTGCGG  
TTGTTGTTGTTGCTGTTGCTGCTGCTGCTGTAATATTGACTGTATTTTCGTTGCTGCTGCTGTTGCTGCTTTTT  
TTGTTGCCGGCCACGAATACGATTTATGTTTATTAACTTTGCGCATGTTTGAATACAGCGCATCCTTTGTA  
ACTGGCAATGTGCCCCCTCTCCACAGTTGGCGCATTTAGCAATTGTGTCCCTATCCTTGGCACACATTGTTGT  
TGGGTGCTCACCGGCACATTTAAGGCAGACAAATGGCCGACGGCAATAGTTTTTGCTGTGACCAAATGCC  
TGACACCTATGACACTGTACTGGGTCAGCACTTTTATGTTGTCTTTCCACAGCGACATGCTGATTACCTAA  
TTCGTTTAATTTACATATTTTTGTATGACCACCATCCACTCTTGGCTCAATCTCTATTTCAAATATGTTCAAT  
GGCTTGCCACTAAATCGATGCTTCATGACGTTAACGTATCTGACAACATAACCCAATTCTCCCAATTGGGT  
ACGCAACCAGTCGCATGGAGTCGAACTGTGCAAATGTTTTAATATAACCTGTAGCCACGCTCACTTCTCG  
GCTGGTGTGTGTGCATAGGTATATTTTCTGTATTTAATAAGCCCAATATGGCGTTATATGTGCTGAAATCTT  
TACATTGTACTCTAATCCCATCACCTGGGTACATTTTGTGTAAATTTATTGACGCCCTGTGCGTTATTTA  
ATTTCTCCATTAGTGGCTGAATTTCTTTTACATTGGGCACAAAAAGTGTTGGAATTTTAATACTTTGACCTA  
ACTGCGGTTGCGCTTCCTGAACTTCACTAGCTACCTGCTTGCCGCTATTTGCTGCTCTGTTGCTTCATCAT  
CCGAAATAATTACCTCCGAATATCCATCACTACTGGTGTGGCATCAATGTCCATGTTTCATGTTGCCTTCCT  
CCCCACCGGGCATGGCATTTTTTGCTAAATTATTTTTTGGTCTTGCAATATTGTATAATCTAACAATAGGCT  
GCAAGTTAGATTGCATTGCATTTTGCAAATTATTAGGGCCAAGAGAGCTAGCAGCGCGCATTACTTTACGC  
TGCTGCTTCATTGGCATAGTCACTCTACGCTTAGCGCCATTTATTTTTGCGGCCATTGTACCTTAGCAGCA  
TCACGCAAGCGACCACTTGTTGTTTCTGTTGCACATTCACTTAACCGTTGGCGCCAATTTTTGCGCGTCACC  
TGTTGCAAAGATGGCGGAACATTGCCTTCTAGGTAGCTATGACATTTGCGCTAGTGGTTGTTCTTGTACTT  
GTTGTAGTTGCTGCCCCTGTTGACTCAGGCAGAAATGGCGGATCATTTAGCGGCACTTCTGCCGCGAGAAT  
TGGCGTCTGTTGCTGTTGTTGCACTTGCTGGCAAGTAGATCCTGTAGTTGTTGTTGCTGCTCCCACCGCTCT  
TCTCTCAATTCCAACTATAGCATTTGTCCAGTTAGTGTCTCATCGCTATCACAGAACATATGAGAAAGCG  
CCGTCTCAGAGAATGCTGAGGTAGCACTTTCGCAAGTTAAGATAGTCTCATCAGAAATATCACCTGTATT  
TCACTTCTCTCTGTTGTGCGCTTCACATTTTACCTGCACTTGTTATTAGTGACGCCAGCGGCTGCCATATT  
GCCGGCACATAACCAAGACGTTTGGCCTCATTATGCACACGATTTATATCCTCAGATTGCACCTGCACAAT  
CCCAGGATCTCTATTTAGCCACTCCTCAGAGGGCTTTCCACTTTTATTTGCATTGTGTTCCATATTTACTAG  
TTGATTCGATAGCGCATTTCCATTTTATATGCGCACAATATATATTTTATATGCCGAGTATGTGTGTTTGTG  
TGCCACATAAATTGCACTTGCACTGTACGAGCGCAATGTCCTTATTTGATTTTAATTTCTTTTTGGTTTGGT  
TTTGGTTTAATTGACTTTTTATTTATTTATTTTATTTTATTTTATTTTATTTTATTTTATTTTATTTTATTTT  
AGTGCGTCCGAGCGCAATCAAGCCTTTCGGTTTTTTTAAAGTTGAGTTTTTTTTTTTTTAAATCTAAGTTAAG  
TTTAATTTTTT

>160\_rnd-1\_family-152\_\_LTR\_\_Gypsy  
CCCCAGCCAAACAGCCCTAGGTTATGGGCTAATATTCTGAGCGCCATTTTCATAAAGCACGTCTGCAGTGCC  
AATTGGAGCATCCGACGGGTACAGAAGATATTGACGCTCATGGCGGTCTCATCAACCGAATCCGGGTCCC  
CATCGCAAACCCAGTGCAAAACAAAAAAACTACCGACTTAAATGATTAGCTAAAATTTCTAAATTTATT  
GGGTGCAGTGCCATATGAGTTGAGTGCCCTAGCATTAATAAGAAATATCGACATTTTATTCCATTTTT  
TTGTATATATACGAAAGCAAGTCAGTACAAAGCAAGTCAGCAGTGCTCTCAAGCTAAAAAAAACGTTG  
CAACAAAAGAAAAATGAAAATATAACTTAAAAAATTTGCTGTATAAATAAATAGTACAAAGAAAAATC

ATAAAAATAATATGCATAATTAACAACCTTTTTAATGCTCACGTGATGAAAGAAAGTTTTCTCATTGCGTCT  
TCGTATCTGCATACAGACATACATTCATACAGCTTTTAGTTAGGTAATAGTTAGCACTAACCAAACAACAT  
CTAGACTGGACATCAGTGCAGGAAAGGTGGCACAAAAAGTATCGGTGGCATCTGGTCCAAGCTCGCGAGT  
ATGGGAGTAGAAGATATACAGTTGATGTATTTTTGAACCGCTTACTCTACAGGAAAGTGCTTAGCGTACA  
CTCTTCCATATGATTTGTGCGATGATGTTTAGGGATCGCTTAAATGTGTGTGTGTGCAAATTATTAATTAAT  
GTATGTCCTGCGATGTAACACAATGTTATCATGGGTAAAGTTGCGTTGATCCCGAGCTGCTGTAGTGCGTAT  
ATGCCCTTACAGAATACCCCGTACTTAAATATAAAGTATGCAGCACTTTGTTGCATACAATAACAATAATA  
TAGTAAACGAGCCCAGAGCCACATTATGTATTGGCTCGGTCTCATATTACGCAGCGCGGTTCACTAGCCTC  
ACTAGCTGACCGTTTATGCTTATGCTGCATATCCCACGCTCCGTCTGAGCGCGTTCCGTGAGCATACATAT  
ATGCTCACTAATACAGGCATATGCGAGCTACTCACTCTCCCTCTCTTTGTAGCTGTTAACGAATAACAGCA  
TAAGTATATATGTATATCCATAGGCTAAGCGAACGTGATAACAAGTGAATAAATGCATTCTGAACAAAGA  
TACAAAACAGCACTGACGTGCTGGCTTATTTTTTATTGACAATAAGTGCTCTTTTTTACATGGCGACCGTGA  
CAAGTGTCACGAACATGTTAAAAAGTAATAGTAAAATGCTCACCATAAAGTAGACACACACACAGAAAA  
TAATAACTACAACCTGCTTTGAGTTGGACTGGAGCTGAAAAAAAAAAAAAAAAACAAAAATATACTGAGTGAGT  
ACAGGGCATGAGCTCTAAGGCAAAAAATAAGCCAAGACGCAGTGGCATTAAGGAGCGAATCAGACGGAG  
AAAGTCTGAAATCGTAAGACTCCTTTATAAATGCAAAAAATCCCTCCCATGGGACACTGCAGTGAAACTA  
AATGACGAACTCGAACATCTCGATTGCTTGTTAAAAATCAAAGAGCGAGCCCTGTCCCTCAGATATAAATA  
TAAAACAATAACAAAGAATCATCGTCCACCGCCAAGACAGATACCAGCACGTCCACGCAGATGCCCACC  
AGATTGTGAGGGCCCCCTTCACAGCCCCCATTGCGAGGGCACCTGCCGCACTAAGGAAGCAGAGACAACC  
AACGCATGAGAGGCAAACCGCCGCTTATGCCTACGAGGGAATTCTAAGCAACTAAGACGAGTTGCATGA  
GAGGCAAACCGCCGCTTATGCCTACGAGGGAATACTAAGCAACTAAGACGAGTTGCATGAGAGGCAAACCGCCGCTTAT  
GCCTACGAGGGAATACTAAGCAACTAAGACGAGTTGCATGAGAGGCACACCGCCCCCTTATGCCTACGTGG  
GAAGAAGAAGAAGAAGACCCTATAACAACAGTACCGGCAGCGCCAACATATTAAATTAAATAGTAATA  
AATAAACTTAAAAATTGTAATGCCCCGACGACAATTGAGTCGACCGGCAAGACGTTTGGCCCGTACAGCC  
ATTCGAANCAATAGGTAGGAAAAATACAGATTGTAAAAAAAAAAAAATTTTTTTAAGATGCGTTTTAAGCAG  
AAAACAAACAAACAACACTTGTCTTGTAAGTAACGAAAACAAATTTAACANTACGCATTTGTAAAT  
TTTTTTTAAAGATAATTCCTAAACCTCAAATGAACGATACAAACAACAACTTGTCTTGTAAGTAAACGAA  
AACAAATTTAACATTACGCATTTGTAAATTTTTTTTTTAAAGATAATTCCTTTTTTACTTTTATGTATGATCCCAT  
ACAATATATGAATATTAATATCAAAAAGAGGAAATTAAAAAGTTATAATTCGTTTCAGCTTGTCTCATTAG  
GTAATTCAAATTTATGATCAAGAATTAGCATGATCGAGGACAAGATTAACAAAGTATATAACGACTATAC  
AGACTTTCGTATGCGAGCCATACAAATTTTGCAAAGGCATAGAGAATTCATATCAGTATATGAGTTCGAA  
TCCGAATATATAGAAACATTCGGCACAGTGACAAGTCCACTCTATTCATGTTCTAAAATGGAGTGCGGAA  
TAATCTTGTCTACACTACCCTACGTCAAAATAAAAAACAATTATTGACGAGCATCCGATTCTAGGGCAGAC  
AACAAATTGTCTTAGTACGTCTGCATAGGTAGTAGTCAAATCAAAAAGCAAGAGTATTTATATAGGAACAT  
GGGGGGAAAACAATCAAAGGCAGATGATAACACTGCCAATGTNGTTAACGTAGTAGAAGTCGTAGACAC  
CACTCCCCATGTGCAGTTAACAAACATACTGCTAATAATACTCATTGTAATAGCTTCAGTAAACNTCCTTC  
TGGAGATTTATCTTCNTCATAAAAAATCACTGAGGAAGCGTTACATGAGTCGAGCCAACGACTTAGACAA  
GGTCTAAGCCACTGCTCTAATAAAATATTTAAGTAGCGGAAGCTTACATGGAGCCGGTCCCAAATAGTAG  
AAAAGATAAAGCGGTATAGAGAAAATTTGATAAATCATAACAAGTGCCTTAATAAAAGCGCACCAAGTTTT  
AAGACCCACCATAATTAACATACTGAGATCCTTGTATATGAGTACAATGAAATCAGGAGTCTAGTTACC  
GAGTGTCAAATAAACTGACAAGTTTACACAGAGTCCAACTTCAGACGTTTTACAGCGCTAAGGGATAA  
TCTGGTAACTTAAATAAAAAGTATGATCTCCAGCTTTATCTACCATCGGCGCTAAATACACCGGTAACAT  
TTGATAAGTCACTACTGACAAACGACCAATAGAAGANACAGAATTAGTAGACATGGCACAAACAGTTG  
TAGAATTTATCAAGCTAGCCACATCTCTGATACCAGAGTTTGACGGTAAGCCGGAAAAATCTACAAAGTTTT  
CTAGATTCTTTGAATCTATTAGAAACCTTAAAAGGCACACATGAGCTAACGGCCGTAAGCCTTATAAAAA  
CAAAGCTAAAAGGCCATGCGAGAAATTTGATAAGTAATGAGCAGACAATTGCTGCAATCATTACGCAACT  
ATCGAACGCAGTAAAAGGAGAATCGGTAGAAGTTGTATCTGCTAAGCTTCTAAATTTGCAACAGAAAAAT  
AAAACGGCTAACCAATACACCCAAGAGGTGGAAAAACTGGCAAAGGCCCTTGAAGGCGCCTATATCAGT  
GAAGGTCTAAGCCAATCACTTGCAAACAAATACAGCACTACAACAGCTGTAAAAGCTATGACCCAAAATT  
GTTTCGATTGATAAGGTAAAACCTTATCATGCAGGCAGGCACATTCACAAATATGAATGATGCCGTCTCCAA  
ATTTGTCAATAGTTGCACGGAGATTAACAGGTCAAAGTAACACTGTCCTGTATTATCGACGAGGTGCAAA  
CAACAATAATAGAGGAGGCCGAGGTTATAATCGTGGCAGAAATTACAACCACAACAATTACAACCGAGG  
CGGTAATAACAACAACAATAATTACAATAACCGTGGAGGAAGACGAGGCCAAAATCGAGGAAGAGG

CCGAGGTAATCCAACCAAGGTNATAATAATAACAATGTGAGAGTGGCGCAAAATGCGTCGGAAAACTCT  
CAGAACCCTTTAGGAAACAACCAGTAAATGCAAAGGTTTCATTCCATCAATTACAGTCTTAATATATTTGTC  
ACTTTTTATAATCATTCAACTGAAAATAAACTCACATTCCTAATAGATACTGGTGCAGATATCTCACTTTT  
AAAAATAAATTCAGATAATTTCAAATTCAAGAAGANAAAATTATAAACATCCAAGGCATNGGCCAGGG  
TGTAATAAAATCNCAAGGAACAACCTTCAATAGAACTTCAATCAACAAAATATATTATCCACACGAATTT  
CATTTAGTAGACTCNGATTTTTTCAATACCGTGTGATGGAATAATAGGCATTGATTTTTATTAATAAATTCAA  
TTGTCAATTAGATTTCAAACCAAGTGAAGACTGGTTTATAATTAGACCTCAAAACTTAAATTATCCNATTT  
ATGTTCCGATAACATATAGTGCTGGCAACAATACANTTCTTCTGCCAGCCAGATCCCAAGTAATTTCGAAA  
AATAGACATTAATNCAGTAAACGATTATATATTTGTTCCNAATCAAGAAATACATAATGGAATTTATGTTG  
CAAATACAATAGCAGCATCCAAACATGTATACATTCGCCTTCTAAACACAACCTAATTTTCGACCAATTGGTC  
AAAGTAAACAAAATCNAATATGAAAATTTAACAGATTACGACATTCATAACACTAATCCAGAAAATAGA  
AGCGAACAAGTACTTTCAAAGTTAAAGAAAAATTTTCCAGAACAATTCAGAAGTCAACTAACAGAATTAT  
GCACCAAGTATAGTGATGTGTTCCGACTGGAAACCGAACCAATAGCGACAAATAATTTTTATAAACAAAC  
ATTAAGACTTAAAGATGATGAACCCATTTATATNAAAACTACAGAAGCCCGCATAGCCAAGTTGANGAA  
ATCCAAAAACAAGTAGGGAAATTAATAAACGACAAAATCGTAGAACCGATCTGTATCCGAGTATAACAG  
CCCCTCTTGCTAGTTCCGAAAANATCATTACCAAATTCGGAAGAAAAGAAATGGCGATTAGTAATTGAC  
TATCGCCAAATCAACAAAAAATTACTTTCTGACAAATTCCTCGCTCCCCAGAATTGATGATATTCTAGACCA  
ACTGGGCAGAGCTAAATACTTTTCATGCCTTGACTTAATGTCAGGTTTCCACCAAATTGAACTTGAAGAAA  
ATTCAAGAAATATAACATCTTTTTCAACGAGCAATGGCTCATATCGCTTCACGCGATTACCATTTGGTCTT  
AAAATAGCACCAAATTCATTTTCAGAGAATGATGACTATAGCATTCTCGGGTTTAGAACCTCTCAGGCATT  
CCTTTATATGGATGACTTAATGGTGATAGGATGTTCCGAAAAACACATGATTAATAAATTAATGATGTTT  
TTAATGTATGTAGGAAATATAACCTAAAGTTGCATCCAGAAAAATGTTTCAATTTTTTACGCATGAAGTGACA  
TTTTTAGGTCACAAATGCACTGACAAAGGAGTATTGCCAGATGACAAGAAATTCGACGTCATCAAAAATT  
ATCCTGTCCCTCATGATGCGGACAGCGCGAGACGATTTGTAGCATTCTGCAATTATTATCGTCGATTTATA  
AAAAACTTCGCCGATTATTCACGGCACATAACTAGATTATGTAAAAAGAATGTTCTTTTTGAATGGTCAAG  
TGAATGCCAAAACGCATTCCAATACCTTAAAGAAAAGCTTATGCACCCACATTATTACAATATCCTGATT  
TTCGCAAAGAATTTTGCATTATAACAGATGCTAGTAAACAAGCTTGCGGAGCGGTTCTAACTCAGAACCG  
TGACGGAATTCAGCTCCCAATAGCTTATGCATCTCGTTCATTTACAAAAGGGGAAAGCAATAAGAGCACA  
ACAGAACAAGAGTTAGCGGCAATTCATTGGGCAATTACCCATTTTAGACCATATATTTATGGCAAACACTT  
TACTATTAACCGGATCACAGACCATTGACATATCTTTTTTCTATGACTAATCCCAGCTCGAAATTAACTC  
GCATGCGGCTAGAGCTTGAAGAATACGACTTCACAGTAGAATACCTAAAGGGGAAAGATAATTTTCGTAGC  
AGACGCACTTTTCGCGTATTAATATAAAAGAACTCAAAGATATGCAACATAAAGTCTTGAAAGTCACTACC  
AGGCGACAAAGTAGACAAAATAAAAACTGTACAGTAGAAAATTATGAACTTCTGCCAAGGCAAAGTCAT  
AAAAATGTATCTAAGCCCAACGTACATGAAGTCATTACAAATGATGAAGTACGAAAAGTAGTGACCTTGC  
GCATAACAGAATCTAAATGTTTATTTAAACATGGAAATAAAATTATCGCAAGAATTGAAGTTAGCGATTT  
ATATACTAATGGAATCCTCGACCTAGGTCAGTTCTTCCAAAGGCTCGAAAAAGAGGCCGGTATATTAATA  
ATCAGCCAACTCAAAGTGGCACCGAGCGAAAAGATCTTTGAATCAGTTTCAATAGATTNTTTTTAAAAATA  
TGGGCAATGAAATATTAATAATCTTTAAGAGTAGCGCTACTCCAGCCGGTGACCCAAATAAANGATGAAAA  
AGAGATACAACAAATATTGTCTACATACCATGACGACCCAATTCAAGGAGGTCATAGCGGCATAACAAGA  
ACGCTAGCGAAAATAAAAAAGACACTACTACTGGAAAAATATGACGCGTCATATAAAAGAGTACGTACGT  
AGATGTCAAAAATGCCAAATGTCTAAAACAAAGACGCACACAAAAACTCCTTTGACTCTCACAGAAACAC  
CTGTGAATGCTTTTCGATATAGTGATAGTGATAGTGGATACAGTTGGTCCGCTACCCAAATCGGAAAATGGCAATGA  
ATACATAGTCACATTAATATGCGACCTTACAAAATATTTAGTAGCCATTCCAATAAAAAGCAAAAGCGCA  
AATAATGTGCAAAAAGCTATATTCGAAAATTTTCACTCAAGTTTGGTCCAATGAAGACGTTTCATCTCGGA  
CATGGGAACAGAGTATAAAAACCAGATTTTAACTGATTTATGCAAGTATNTGAAGATCAAGAATCTCACC  
TCTACTGCATATCATCATCAAACATTAGGGACAATAGAACGAAGTCATCGAACNTTTAATGAATACATTC  
GTTTATACATCTCTGCAGACAAAACCTGATTGGGATGTCTGGGTTCAATATTTCACTTATTGCTTCAACACG  
ACACCATCAGCAACGCATGAGTATTGTCCATACGAACCTAGTATTTGGCAGACTACCGAAACAGTTCATAG  
ATTTAAACAAAACCTAATTACATAGATCCTATTTATAATTTAGATGACTACTCTAAGGAAATAAAGTTTGA  
TTAGAAATAGCATACAAAAGAGCTAGAATTATGTTAGAAAAAGCCAAGGCTTATAGGAAATTAGCATATG  
ACGAAAAAACAAAAAACTTTGAATTAAGTAGGAGATAAAGTACTTATAAGAAACGAAACAGGGCACA  
AATTAGACCCAGTATATTTAGGACCATATATAGTAGAGAAAATAGAAGATAATGACAACATTTTTATTAA  
AGATAGTAAGGATAAGAAACAAAAAGTNCATAAGGATAGGTTAAAAATNTNTAATCCATAAAA

>160\_rnd-1\_family-272\_\_Unknown

GATCGGACCACTATATCATATAGCTGCCATAGGAACGATCGGTCGAAAATTAAGTTTTTGTATGAAAAAA  
CATTTTGTATTATCAAGATATCTTGACCAAACCTCGGCATTTATTAGTTTTACTTTACTCCTCATATATATGCA  
AAATCCTATNAAGATCGGACCACTATATCATATAGCTGCCATAGGAACGATCGGTCGAAAATTAAGTTTT  
TGTATGAAAAAACATTTTGTTCATAGATATCTTGACCAAACCTCGGCATTTATTAGTTTTACTTTACTCCT  
CATATATATGCGAAATCCTATNAAGATCGGACCACTATATCATATAGCTGCCATAGGAACGATCGGTCGA  
AAATTAAGTTTTTGTATGAAAAAACATTTTGTTCATAGATATCTTGACCAAACCTCGGCATTTATTAGTTT  
TACTTTACTCCTCATATATATGCAAAATCCTATTAAGATCGGACCACTATATCATATAGCTGCCGTAGGAA  
CGATCGGTCGAAAATTAAGTTTTTGTATGAAAAAACATTTTGTTCATAGATATCTTGACCAAACCTCGGC  
ATTTATTAGTTTTACTTTACTCCTCATATATATGCAAAATCCTATTAAGATCGGACCACTATATCATATAGC  
TGCCGTAGGANCGATCGGTCGAAAATTAAGTTTTTGTATGAAAAAACATTTTGTTCATAGATATCTTGAC  
CCAAACTAGGCATTTATTAGTTTTACTTTACTCCTCATATATGTGCAAAATCCTATAAAGATCGGACCACT  
ATATCATATTGCTGCCATAGGAACGATCGGTCGAAAATTAAGTTTTTGTATGAAAAAACATTTTGTTCNTC  
AAGATATCTTGACCAAACCTCGGCATTTATTAGTTTTACTTTGCTCCTCATATATATGCAAAATCCTATTAAG  
ATCGGACCACTATATCATATAGCTGCCATAGGATCGATCGGTCGAAAATTAAGTTTTTGTATGAAAAAAC  
ATTNTGTTTTTCAAGATATCTTGACCAAACCTCGGCATTTATTAGTTTTACTTTACTCCTCATATATGTGCAA  
AATCCTATAAAGATCGGACCACTATATCATATAGCTGTCATAGGAACGATCGGTCGAAAATTAAGTTGTA  
TGAAAAAACATTTTGTTCATAGATATCTTGACCAAACCTCGGCATTTACTATTTTCCCGGTACTTCTTAGA  
TAGAGGCAAAGCACTATGAGCATTATGAAAAGGTTGGGTCTGCAAGGGTATTAGATCTTTGGCGTGCCGA  
AGATAGCCCTTCTTCTCGTTAGTTTTTGTATGAAAAACTCAGTACAATTTCAAAAAATTTTAACAATGTA  
CTAACGACTAAGTTATGTCAAAATTTAAATTCCTTTATTTACCAGTTTCGTTTGAAAAAAATGTTTCATTCAT  
TTTCAATAGCTTTTAGGTAACCAAGTAAGAATGCTNTAGTTGGGAGTGCACGGCTAGGGGATACCAT  
TCCTACCAACAACAACGCCGCTATAGCTATAGAATAAAAGATACCTGATTTGCATGGACAGGCAGAGGC  
ACATGGCTAGATCGACTAGGCTATTGATGCTGATCAAGAATACATACTTTAAGTGTTGAAGATCCTTTCT  
TCTGCCTGTTACATACGGCTGCACAAATACATTATACCCCTTTTACCCATTTTAAATGGGTTTCAGGCTTTAA  
AAAGGCGAACACAATCAGTCAATAAATAAAATCTTGCCGTGTTGCGTTTCTGGAGCCATTTCAAACCTTGT  
TAGATTAAATATAAACAATAAATAAACAATGTTATAAATATATATGTTTCATATGTATAAATATGCATAT  
AAATTTTCAATTTGAATTAAATAGCATGGAATCCAAAAGTGACGCTATGTTAGGGGCTGCCAACTTATGTAG  
AATGCTAACCTATGGGAACATAAAGATGCCACCTTGTGGAAGTACATTGACATTGTTAGTATATTTAGCCA  
AAAAATTGTTAAATTTAAATAATTTTCTACTTACATGTCTTTAGCGTGCCCATTTGATTTTTATGTATTCT  
TGCCATTCACACGACAGCATTGCCAGCTGATCGTGCAAGAAATTTCCCCCAGCTAACTGACCTAAGACAAT  
ATGTTAAATGTACAGAGTCTGTTATGTCTATGTTTATATGTAGGTCAGTCGAGATTAAATGTTAAAT  
GTATCTCTTGTCTATGTCCTCTCCACCTTGCAAACTGGTGAACGTTGCATAGTTTTAAGTGCTCCCAAACT  
GTTCTAAAATTTCTGTTTGCAATTGAAATCATATGTAGAAATGAGCAACAATAAAATCTCTCTGTGGCGG  
TCGAGGCGAGCGGGCGTGTTTGCGGACAGCGCCCGGTCGGCCAATCAGACGAACAACCTAAAAATTGTGA  
AAGTACATAAGTAAAAGTACACATGACGATGAAACATGTTATTTACATATATGTTTATAAGTTAAACATG  
TTATTTATATAAAATAAATACTTTAAATAGTTGTTAAACATTCTACAATTTGTATTATTATCTGTGTATAT  
ATAAATCTATATACTTCGTTTTGAACACTCCCGTTCTCATTGCCTGCGTTGGCTGTACTGACGAATTCAACT  
TTTCACCGCACGCGAGTTGAATTCGTCCCACTGTACAGCCTCTGTGCGGACGCCTTAACGGCCCTTCGACG  
CCGACGTGCGGCTGCGGCGCGCATCTGTGCACACGTATGCAAGCGTGGTCTCACTGTGCCCCGTCTGGCGC  
GCGCGCGCTGTACTTTTTTGTATCGCCGCTATATTCCCGATGTTCACTCTGTATGTGCGTCAACTTAGCGGCG  
GTGACTTAGCGTCGATTTTTTGGTACTTGGTATCCGAAAAGGAATCGGTCACTTTTAAATGCATTTATTTAT  
GTTTTTAAGCACAGAACCTAATAAATTTAAATGCAGAATTGTAAAAAATTAAATTTTACTGCCTACATT  
CATTTGTTTTTGAATTTTAAATTTATAATATGGGTAAACCAAGGGGTTTAAATATTAGGTTTCCACCATTTCCA  
TAAATATCCAAATTTAGGGATAATGGCCCCGAAAACCGCATATACACGATTAAAGCCTATAGTTTCACCT  
AGACAACTGTGAAAATTTGATTAAAATCTTCGGTACCATTTTAAAGATATTTGGAAAAGAGTGCAACAAC  
CCCCATGTCAGCCCCATATAAAATGACCGCAAAAAATCAACCTTCTTATTTCTTAACCTCAGAGACAATGTC  
CCTCAATGCACGCTATACCTCTTGTAGATACATATTTTAAAGAAGCTTTAGGCACTAAATTTAAGTAAATG  
GACGGTACAGATTTTTCAGAAAATTTTACTTGTAAACCAACCTCATATAGTTTCATTCATAAAGTCTATCG  
AACTGCTATTTTCTACGTGAACCTGAATCACTGCCTGGCATCAGTGTTGAACAATTTTGTACAGAATTGGGC  
GGGAACCAATCCAATTTGAATAATATGTTATCATGAAAATTACTTATTGTTAACAATAAGTTTATAGAGCG  
AAATTAGACAGATTTTCAACTGGCAGATAATGTTAAGAATCGAAAAATTATTACGAAAAGTTTTAAGTTC  
GTAAGAAATATTAGAGCTTTAATATTTTGTATAACCTTATTGGTGAGTTGTTTTACCCGTTTCAGGCTGCC  
TACTCAAAGAACGCCAGGACGTATCTAGTGGTAGTAATCATGTTAGCAGTAACTAGAAATTAGCAATA  
ATATTAGTGATATGTCTAGCATAGAAAATAATAATTCTAATTATAGTCTTAATGAGCCTACAAATTGTCCG



TCTGAGTTTAATAATGACGCATGCTTTGTCGAAGCGACATTA AAAATGCTTTCGGAAAAAATACCACAATTT  
TCTTGATAGCTTAAACAGAGAAGTTCAGTTAGTTAGTAATTTGAAAGGATGCCGCGCAGCACTTTCAGGTT  
ACAACAATTTGGATACTGAAATGAGTATCCAAGAATTTATGGCCACGTTAAATCAATTGTGTGCGATTAA  
AAAAAAAAAAAAACATTGAACACATTATTCGAGAAGCATACACTCTTCATAGCAATGCATGTGTTTTGCACT  
TTAAGTCAATTAGACTTAACACAAACTCTTTTGCTGCATATGGTTACTGCAAAGATCCATCATGCAACTAC  
TTCTTGTTCCATGGCAGCCAACATATCTCCCATACAATTGGCCTTAAAAAGTCAACGCAATGCAGAACAAAT  
AAATAGATTTTATAGAAAAGGCTTCCATTAGAAACTCTTCTGCGTTCGAGTATAGATCAAAAAAAAAAAN  
AACAAAATCAATATGTCTCGAGCCAGAGTTGGTAATGATCAGATTACTAATGAGAACTACCCTTTTATA  
GAAATTTAATTTTCGGAGGAAAATTGACTTTGACAACCTCACGGATAAATCGTCCTTGCTTTAAGCCGTTTTT  
ATTATTTGTCTTTATAAACTATATTTAAGCGTTTTTAAGAATGATTCTATAGGCCCATTA CTGGGTCTTTT  
ATTAGATTTATCAATAAAAGTAATGATAATATTGGTTCAAAAAGGTGCGTAAACAATATATTTATTTAAAA  
TTAGATCCAGCATTCTGCACTTAAATAAATATTTGACGTACAGAAGTTGCTTTTATATTGTGATACAAGT  
TCTGTAACTTCTGTACGTATTTCTTGAAGATTAAGTTTAAATGGACTATTTTCGGCAATGGACAGCAACGT  
TGGATCATTGACGACTTCCTTACTTACTCCCAATTTTATACTGTCTATCAAATAAAATGTGGATGGCTCTTC  
ACAATATTTAGTAAAATAATTAGCGGCATCATCCACAATATTATTAACATATGGAGAAAGAAGTATTATT  
GCAATATTTTCGGAACCATTTTTCTAATTTTCCAATATTATTTATGGAATATGCACAACCCAAGGCATTTCTT  
AAAAATGATTTAAGATCAATATTGTGCGAAAGCAACTACTTCATCTATGTTGCGACACTTAATTTTGCTGTA  
GTGGCTCATACAAAACCTGAACCCAGACTTTTGGAAATGTGCGATTTAAATTATACAAAAAACTAAAACAA  
ATTTCAATTGTACGTTGCAAGATCAATGTTGTTATATTCTTTTAAATGGCTCCAATTATTGCAAAACTGACA  
TCAGTTATAATTCTTTTGCAAATAGGCCATTTGAATTTATTTTTTATGCAAACTCGCGCAGCTCACATAGA  
AATCTGCCTATATCTGACGATTTATGATTGGAGAGAATCGCATGTGCGACAGGAAAAACGATTCGAAGCT  
CTGGAATATAAGCAACCAATGAATATAAAAAATGTACATTTTTTTGATCAAGTTCATTGGCTGTACTACATTC  
CCAGTCGCATCAAATATGCAGTGTCTGTCCCATAAAAAATATTTCTAGTTTCATAGAAAGTAACTGAATAAA  
GTTGGCATAACACATTAGTAATCATATCGAAGGTATCTTTAAATGGATCTTTGTCAAAATCAAATTTTCCAT  
TTTCCTTCGAAATTAATTTCTATAAAAGGGTAGTTTCTCATTAGTAATCTGATCATTACCAACTCTGGCTC  
GAGACATATTGATTTTTTTTATTTTTCTTTTTTGATCTATATTCAAACGCAGAAGAGTTTCTAATGGAAGCCT  
TTTCTATAAATCTATTTTTTCGTTCTGCACCGCGTTGACTTTTTAAGGCCAATTGTATGGGAGATATGTTGGC  
TGCTTGTGTATACACTTACAACACCGTCAAATGTCCCATGGAACAAAACGTAATTGCATGACGGATCTTTG  
CAGTAACCATATGCAGCAAAAGAATTTTTGTTAAGTCTAATTGACTTAAAATACAAAACACATGCGTTGTT  
ATGAGAAGTGTATGCTTCTCGAATAATGTGNTCAATGCTTTTTTTTTTTAAAATCGCACACAATTGATTTAA  
CGTGGCCATAAATTCTTGGATACTCATTTTCAGTATCCAAATTGTTGTAACCTGAAAGTGCTGCGCGGCATC  
CTTTCAAATTACTAACTAACTGAACCTCTCTGTTTAAGCTATCATGAAAATTGTGGTATTTTTTCCGAAAGC  
ATTTTAATGTCGCTTCGACAAAGCATGCGTCATTATTAACTCAGACGGACAATTTGTAGGCTCANTAAGA  
CTATAATTAGAATTATTATTTTTCTATGCTAGACATATCACTAATATTATTGCTAATTTCTAGTTTACTGCTT  
ACATGATTACTACCGCTAGATACGTCCTGGCGTTCTTTTGAGTAGGCAGCCTGAAAGGGGTAAAACAACT  
CACCAATTAGGGTTATAAAAAATATTAAAGCTTTATGATTACTTACGCGTTTAAAACCTTTTCGTAATAATT  
TTTCGATTCTTAACATTATCTGCCAGTTGAAAATCTGTCTAATTCGCTCTATAAACTTATTGTTAACAATA  
AGTAATATAGATTGAAAATCAGTTGGACTTAAAGTTTCCAACCTGGAGATATTATGCTTCTAGCAATGGCTC  
TTTATGGCATCACGAAATCCAAGAGAGATTGTCCTTAAAAAATTGTTTATATATTAATGGTAAAATTAAT  
CGAATAAGTTAAGCAACAATTTTATTATCTACCCTTGCAAGAGGGTATTATAATTTTGTGCTGAAATGTGTA  
ACGCATAGAAGGAGACATCTCCGACCCCATAAAGTATATATATTCTTAATCAGCATCAACAGCCGAGTCG  
ATATAGCCATGTCCGTCTGTCCGTTTGTCTATTTCTATGCGAACTAGTCCCTCAGTTTTAAAGCTCTCTTAA  
TGAAACTTTGCAGAACTCCCTCTTTCTGTTGCACGCAGCATATATGTGAAAACAGCTGGATCGGACACTA  
TATCATATAGCTGCCATAGGAACGATCGGTCGAAAATTAAGTTTTTGTATGAAAAAACATTTTGTTTATCA  
AGATATCTTGACCAAACCTCGGCATTTATTAGTGTTACTTTACTCCTCATATATGTGCAAAATCCTATTAAG  
ATCGGACCACTATATCATATAGCTGCCATGGGAACGATCGGTCGAAAATTAAGTTTTTGTATGAAAAAAC  
ATTTTGTTTTTTCAAGATATCTTGACCAAACCTCGGCATTTATTAGTTTTACTTTACTCCTCATATATGTGCAA  
AATCCTATAAAGATCGGACCACTATATCATATAGCTGCCATAGGAACGATCGGTCGAAAATTAAGTTTTT  
GTATGAAAAAACATTTTGTTTATCAAGATATCTTGACCAAACCTCGGCATTTATTAGTTTTACTTTACTCCTC  
ATATATATGCAAAATCCTATTAAGATCGGACCACTATATCATATAGCTGCCATAGGANCGATCGGTCGAA  
AATTAAGTTTTTGTATGAAAAAACATTTTGTNTCAAGATATCTTGACCAAACCTCGGCATTTATTAGTTTT  
ACTTTACTCCTCATATATGTGCAAAATCCTATAAAGATCGGACCACTATATCATATAGCTGCCATAGGAAC  
GATCGGTCGAAAATTAAGTTTTTGTATGAAAAAACATTTTGTTTTTCAAGATATCTTGACCAAACCTCGGCA  
TTTATTAGTTTTACTTTACTCCTCATATATATGCAAAATCCTATNAAGATCGGACCACTATATCATATAGCT

GCCATAGGAACGATCGGTCGAAAATTAAGTTTTTGTATGAAAAAACATTTTGTATTATCAAGATATCTTGAC  
CAAACCTCGGCATTTATTAGTTTTACTTTACTCCTCATATATGTGCAAAATCCTATAAAGATCGGACCACTA  
TATCATATAGCTGTCATAGGAACGATCGGTCGAAAATTAAGTTTTTGTATGAAAAAACATTTTGTATTATCA  
AGATATCTTGACCAAACCTCGGCATTTACTA  
>160\_rnd-1\_family-189\_\_LTR\_\_Gypsy  
TGTGCCTGTTTCATCAAAATCATTAAAANGAAGGGCGCGCGTCAGACGCGNGCCAATAATGATTTTGTATGT  
ATTTTCTTTTTGCGCCCATGATCTGCCCATTCACAGATATTTGTATGTGTGTGTCTGTGTGTAAAGGTCCAAA  
ATCAGAAATCCTAAAATCTTGTTAAATTTGCATCGGGGACAGGCAGGCAGGCAAGCAACAGGCACACAA  
GCGCATAAATGCTTCTATTTCATACACAAAATATGCAAGTATGCGTGTATAGCGAGTCCAAAATATTCTAA  
ATGCACACACGGCAACGCTTGGGTACCCTTACCAACGATAGCGAACTAAAATGCCAGAATTTTCGCATCGA  
CGTGGCAAACCTTTTCTCTATTTTCATATTAGCCGTGCCTTCAAAAGGGTAGAAATGCCTCAGCATTTGAGA  
AAAATTGAATTTGTGCGCAGTTTTTGCTCGTCGGACAAATACACACACACAGACATTGAAACGATCCCTAA  
ACATAGAGAGAGCATTGAGAGCTGAGAGTAAGTGCAGAGCGAGATAAAAGTTACCAGCGTTGCCGTTCTAT  
GGCACAATCATATGGAAGAGAGTGTGCCAAGCACTTTCTGTAGAGTAAGCGGTTTAAAAATACATCAT  
ATGTATATCTTACTCCCTTACTCGCGAGTTTTGGACCAGATGCCTCCGATACATTTTGTGACTGCTTCCCGGT  
ACTCATGTCCAGTCTATATGTTGTTTGGTTAGCGGTGGTAGCCACAACGACAAAGACATCTTGTGATGAAA  
AAAAGGTGACATATGGGTAGTTTTTGTAGAGTTTGTCTATTGTGTTTGCCTCTATTTGTTTTGTTTCACTTT  
GTGTTTACGTTTGGTGTGTGTTGGCCCCAGCAATCTGAGTTTCGGAGACAGGTGACCCAGGACGATATTTT  
TTCGATCTAGCGCCACATCTATCACACAGCATACCCCAAAAGTGCGACAGATACCAATTGGCCTTCAAGG  
CCTTCAAGTATTTTATATTTATTAGAAAAACAATATAAAAAATCATTGTTGTGAGTTTTTTCTGTTGTGCGAT  
ATTTATTTGATCATTTATTTATTATTATTAGTAAGATTTGTTTCGTTGGTGTTTATTTATTTATATATTT  
GATAGGAATTATTTGTGTAGTTTTTGTATTAGGGATTAGTATGGCCCAGGAACAGGTGTCTGATTGGGGCT  
CTGTTGCTGAGAGAATATGTCGTACACGGACCGCGAGCAGGCGCCATTCCGAAAGAGCAAGAAGGGGTA  
CAGCGCGAGGAATTTCTCCACCAGTGCCATCGAAGCCACACCGACAGGGCGCGCAAGGAGCGGAGTAC  
TCATACAGCAGCCCAGTATATGTTGCAGCTGCTCAGGCAAGGAGCTGGCGGGGGGCCGAATAATTGCCATT  
TCCGAGTAGAGGACCGCAGAGCGGATGACTTTCAGCCGGAGGAAGCGTATGCCAACGTACGAGAAGCGA  
CGTACCTAAGGCTCGAGCGGTGGAACGTCAAGTTCGATGGCGAGGACGCAATGAATTCTGTGCGAGGACTT  
CGTGTTCGCTTGAAGTTCCTGCAGAGGCAGTATCAATGCCCGTGGAAGGAGGTCTGCGTGCCTTTTTCC  
TGCTCCTGACCGGCCGTGCCCCGCGAGTGGTACTGGATGCACCTAAAAAACTGGAGGAGGCATTTCATGCGA  
GACAGGACATCATCCCGAGTAGTGTGCTGGAAGTGAAGGCAGTTCGACCATGTCTTTAGATACCGCCTAT  
CTAAGAAGAGTTAGATATTCTGCTACAGACGCGGAAAGCCGGGCACATTCTGTGCTGAATGCGAAAATTG  
CCCGGGAAACCACAGAGGAAGCGCAATGGTAGCAGGACAGACACGTTTAGGGACGGCGATCGCCGAAAA  
ACAAGAGAGGAACACCTACCATAAACAATAACACTGGCAGAGGAGAAGAATATAGACCATAAGGACCAG  
GATAAGGTTATATATAAGGATAAAAATGAAGGAAAACCATTAAGGCTTACCATATGAAGAACGTGTC  
CGGGCATAACATGTCGGCCCCGGCATAGGATTTTTGGTGAGCGACAGCTGGAGGTGATGACATTGGCCACCA  
GAAGAGTGCTCAAGGCTCGGGCGCGCTCCCGCAGACGCAAGATGACGAGGCACCAGGTCATCGAAGCTG  
TGAAATGGGAGGATAGCCTAGATCCGCGCGTATTCACCGAAGTGAGGTCGCTGGAATTAAGGAAAG  
GGTTGCTAGACACCAGAGCCTCGGTCAGCCTGCTGGGACAGTGATATTAGTCGTTTGTGTTGAAGCTT  
TTATATGTGCATCATTTAAAATGCAGCCGATTGTGCGAGTTTTGTTCTTGTGTTGTAATAATTGTTGATTCATCA  
ATGTTTTGTGTGTCGTTGCTTGTACGAACTGATTGTTTCTCGGTGGGCGCGCGGCTGGCTCATCGGTTT  
CTCTTTGCTTCTGTGGCACACAGCGCCTGAATCCAGCGACGGAGGACGCTGGCCAGATCAAACCAGATCG  
GCGTAACCATCACGACGGTGAGACGAGCCATCACGGACGGACGCCAACGACGAAGAGGCGGCCGTAGGC  
GAGACCACGCCCACTTCATCACTGAGTGAGTCTGTTCTACGTCGGCCTTCCCTCGCCTGAGTNAAAGGCAG  
AGGCTGAAGCAGACCCATAGTTGAGGCTCCCTGAAGGAGACCAGATATTTTTTTTTTTTGGAAATTGTTAACT  
CTAATTTTTTTTTTTGTAAATTGAATACATAATACTCACGACTAGTCGCAATTAAGGAAATTTCCGAAAG  
TGCGAACAAAGTGCGAAAGTGCGAAATGGCCCAAAGATTATTGCGTCTGCCAAGATTTTGGTCAACTTTA  
TTGGATTGATTGTCTCCCTTTCTTTTATTTCTTTGTTATTTTATATTAACATCTCACCTTAGATGGTTACAT  
TTACTTATCGTCACAGCTGTTTATGTTGTTTATCTGTTAGAAGTTCCGATTGTTTCTTGTATCAATTTGTGA  
GACCAGATATTTTTTTTTTTTGGAAATTGTTAACTCTAATTTTTTTTTTTGTAAATTGAATACATAATACTCAC  
GACTAGTCGCAATTAAGGAAATTTCCGAAAGTGCGAACAAAGCGCGAAAGTGCGAAATGGCCCAAAGAT  
TATTGCGTCTGCCANGATTTTGGTCAACTTTATTGGATTGATTGTCTCCCTTTCTTTTATTTCTTTGTTATT  
TTATATTAACATCTCACCTTAGATGGTTACATTTACTTATCGTCACAGCTGTTTATGTTGTTTATCTGTTAG  
AAGTTCCGATTGTTTCTTGTATCAATTTGTGGACCAAATATTTTTTTTTTTTGGAAATTGTTAACTCTAATTTT  
TTTTGTAAATTGAATACATAATACTCACGACTAGTCGCAATTAAGGAAATTTCCGAAAGTGCGAACAA

AGCGCGAAAGTGCGAAATGGCCCAAAGATTATTACGTCTGCCACGATTTTGGTCAACTTTATTGGATTGAT  
TGTCTCCCCCTTTCTTTTATTTCTTTGTTATTTTATATTAACATCTCACCTTAGATGGTTACATTTACTTATCGT  
CACAGCTGTTTATGTTGTTTCAGCTGTTAGAAAGTTCCGATTGTTTATTGTTATCAATTTGTGGTTCGTTTTGC  
AGAGTGTTGTGTAAGTCTGTTTTGCCACAGACGTGTAGCTTTGTTGTAATCGATTGTGCCGACTGCGGGCC  
AGGGATGGGACTACACCCAGAAAAGCCGATAAGCCAGCCTGCGTGGCCCAACCGAGAAACAAGAAGTTTC  
GTAACATTATGGCGCCCAATTAGGTGCGCGGGGAGCGAAGTACTCATCCAGCAGCCCAGTATATGTCTGC  
CGATGCTTAGCGAGGAACTACCGGAATCCGAATAATCGCCATTTCCGAGTGGAGGACCAGAGAGCGGAT  
GACTTTCAGCCGGAGGAAGCGTATGCCAACGTACGAGAAGCGACGTACCTAAAGCTTGAGCGGTGGAAT  
GTCAAGTTCGATGGCGAGGACGCAATGAATTCTGTCTGAGGACTTCGTGTTTCGCCTGGAGTTCATGCAGA  
GGCAGTTTCAATGCCCGTGGAATGAGGTCCTGAGCGGCGCTCACGTGCTCCTAACCGGCCGTGCCCGCGA  
GTGGTACTGGATGCACGTTCCGGCATTCCAGGGTCGTTAGCTGGATGCAACTGTAGCACACACTCTTAGAC  
AGGTTCCCTGAGATATCAGACGGAACAGCGAAGGGGTGGACGACTATATTCACCACATGCGTCAACTCATC  
GCGTGGTTCGGGAAGGTTCCAGAAGGTTCCGCTGAGAGACCGCGATCTGGAGAAAATTTAAAGCGTGGCT  
TGCAGGAGATCTGCGCAATGGATGTACTCAGCGTGGATCAGTTGCGCCAAGAATGCATAGAGAGTGTAGA  
GGCACGTTTGTCTGCTGTAGCCGGACTGGGTACGTACAGCCGTCGCGTTAGTCACCAGGAACAAGGCCAC  
AGTTCACATAAACGCCTACTAGTGAAGTAGAGGAGGCATTTCGTGCTGTAGGCAGTTCGATCATGCCTTTA  
GATACTGCCTATCAAGCGGAAGATATTCTGCTACAGATGCGGAAAGCCGAACACATTCTGCTTGAAATGC  
GAAACTATCCGGGAAACCCCAGAGGGAGCGCGATAGTAGCGGGACAGGCGCGTTCAGGGACGGAGAACA  
CGGAGAAGCAGGAGAGGAGCCCCTACTAAAGCCAATAGTCGTTGGAAAGGAGTCGGATATTTGAGATAA  
GGACCAGGATAAGGGTATTTATAAGATATAAACAAAAGAGGTACATTAAGGGGCTTACCATACGAAGAA  
TGTGTCCGGGAATACATGTCGGTCCGAAATAGATTTTTTGGTATGCGACAGTTTGATGGGATGACGCTGGC  
CACCAAAGAGTGGTGAAAGCTAGGGCGCGCTTTCGTAGACGCGAGGATGACGAGGCGCCAGGTCATTGA  
AACTGTAGCCGGGAGGATCCAAAAGAAAAGGGTTATTAGACACCGGAGCTTCGGCCAGTCTTTTGGGAAA  
GGGTGGTCGAGCATTAGTTATTTAATTATTCATTAGGAGTTAAGGTGCAACCGTACGTTTCGGTAGTCACG  
AACGCTGGAGGGGAGGATAAATCAATAATTGATAGGGTAGAACTCCTAATCTCGTACGGGGCAGCATAA  
AAAGATAACGTTATAATCTGCCCTACCTGAAACAGTGGGCCTATTTTGAATTGATTTCCTGCGAGCTTTT  
AATCTAGCCCCTGCTGTGTTGGACCCGAGAAGGTGATCTCCACGGAACACCAAGGCGAAGAGCTCTTGGT  
TGTGGCGATGGCACACTATGCGGAAGAAGACGACGGACACAAATACGAGCCAGATTCATGGGAGTTGTC  
TCGGGAAGAAGGGATAGAATTGGAGGCAGTAAAGCAGGAGTTTTATCTTTGAGCATAGCGGACTAGGAT  
CGACAGACTTAGAGAAGCACACTATCGACTTATTGGAAGGTGCACAACCATTCAAAGATAGACCCTACTC  
ATTATCGCCGCGATGAAGAAGGTAGTGGATGATGAAGTGGACAAAATGTTGATTTTGAAGGTTATAGAAG  
TGCAACAACCCATTGAGTAATCGCACAGCCGTATTGCGAAGACCGGGGAAACCCCGTTTTTGCCTCGCTG  
CACGCAACCTCAACAATTTGATGGTGCAAGACGCGTATCCACTACCCTGTATAGAATAGACCGAATCCAC  
TACATCTCCAGTGCGGATCTGAAGTTCGCATATTGGCAGGTGCAACTAGTCGACAAAAGCAACCCCTATA  
CCGTATTTACCGTACCAGGTAGGCCGCTATACCAGTTTCGCGTCATGCCGTTTGGCTTATACAATGAAGCC  
CAATGTCTAGTTCGTCTGATGGTCAAGGTAATTCCCAACGAGTTACGGTCCAACGTTTTTGTGTACTTGAT  
TTCCAAACGCAATTGAAATATTTGCGACAAGTGGGCAAATGCTTAAAAGAAGCCAACTCTATATCGGAT  
GAAAAAATCCAAATTTGGCCTATGGGCATTAAAATACCTAGGATTCATTATAGGTGGTGGCACGATTCGC  
ATAGACCCCGAACGGGTTATAGCTATTAACGAATCACCGTGGCTCGGTACGGAAGAGTTTCGCTCTT  
TTTGGGTTGGTACCGGCGCTTTGTGCGAGATTTGCGGGCAATAGCCGCCCCACTCACTGAAATGCTAAAAA  
AGGATAGCGGAAAGTTTGTATTGAGTGACGAGGTAACACGAGCCGATTATCAGTTGAAGCCCACGCTCCC  
AAACAAAAACAAAATGGTATGTTGGAAAGTTACGTATATATATATATATATATATATATATATATATATAT  
ATATATATATATAAGAAAGTAAATAAGTGAGAATTAAATCGCTTAATTTATACATTGCCTACCTAAAGAG  
CTTTGTGGGATGCTTAGGGCGATGGAAATAAATATAAAGATTATTTCAATTATTTATAAATATATATATGGA  
TATGTATATATATATGTATATATATATATATATATATATATATATATACATGTATGCATGTATGGCCGGT  
GTGGAAGCTTAAAACACCATTTTTTTTACTCCTTTTTTCGCAGTTGACAGGTGCTATAACTTTTTATTTATTTA  
TTTTATTTATTTATTTATTTATTAATGGTCGACAAAACGAGTGTCTTCCTCATTATTCAAAGATTGTACAAT  
AGAATTATATGCTAAAAGCCTAGTTAAAGAATACAATTTTGTAAATAGCATCACCGACCGTCCGGCCAGC  
TGTGCCCTTTTCCCAGCTAATTTTGTCAAGTGACGCTATTAGAGCCTACATCTAAGCAGAAGGTTGTAAGT  
AGGAAAAAGGGTGATCTCAAGTGAAATTAATAATAATCTTAATTTGCTATATTAATAAAGAAAATACAAT  
AAATAGGAAAAAAGAAAGTAAGAAAATTGTTAATAAAGTAAAGCAATGTAAGTTAGATAAAGAGTGTTA  
AGTGGATAGGACAAAAGAGAAAAGTAATGGGAAATCACCGACACGGTGGGGGAAAATTTTTACGCCTGTC  
CGGCTAGCTATGCCCTGCTCATAGCTGGGAATGGTCAGCGACTTTCCGAAGGTATCCTGAAAGCAACGA  
TTTTATTAGGGGTAGAGACAGTTCGGTAGAGAAAACGTGATGCAAACTATTATAATTTTTTACATAGCACG

CGAAAAGAATTGTGCATAGCGTAATCTGTTGTGCACGTAGATAATAATAACGGGCGATAATTTCTGGTTG  
GTCTAGCCGGAACAGAGAATTGAAGACGCCCTAGCAGAAAAGGAGAATCTATGTCGCCAATAATCAACTT  
ATGTGGAAGGACAACACCGAGAATTGTCTACGGTTGATTAACGACGGAAGGTTGAGAAGAAGCAGTCT  
GCTGGAGTAGGACGGCAACCGAAGATTAGGGTCCCAATTTAAACCTCGTAAGGCAAAACGCAGAAATTG  
CTTCTGAACAGATTCAATACGATCCAGGCTGTTGATATACTGTGGAGACCAGATGCAAGAGCAGTATTCA  
AGGATAGGGCGAACAAGAGAGATGTACAGAAGTTTTGTTATAAAAGGATCGTTAAACTCTTTAGATCATC  
GTTTAATGAATCCAAGTACACCTTTTGCCTCATTAAACAATGGTATCTATTTGAAGATTGAAACAGAGTTTA  
GAATCAAAAATAACGCCTAGATCCTTAACTGTTAGTATACGTTGCAAAGGGATATTGTCGATTGTATAACT  
GACAAGATAAGGTGTAGTACGATTAAATGTCATAAACATACACTTTGAACAATTTGGATGCAGTTGATTG  
GCCGAACACGAAAGTTGCATAGCGTTCA

>9\_rnd-1\_family-269\_\_LTR\_\_Pao

TAGTAGCGGGCAGGTCGCGATGGGTATATGAATGATACTGGACATANATATACTATTCTATTGTAAACAT  
GTCGATTTTGGTGGATCTAGCTCTTATTATTTACAAAATTTCTCAAAAAAGAAGATTTTCGTTATCGATTTG  
TATCAATTGATTGGAACAGTGGAGGTTATCGATTATCGGAAAGAACTCGATCTGAGCATGAACTAAGA  
GGACCTACAGCTTAAATTTACGTCTCTAGCCTTTATAGTTACTAAGATCTTGC GTTCATACAAACGGACG  
GACGAAAAAGACGGACAGACAGACGAACATGGCAAGATTGACTCGGCTGTTTATGCATATCAAGAATAT  
ATATACTTTATGGGGTCGGAAAAGCTGCCTTTCTACCTTTTACATGCATTTTCACATTTTGCACAAATACAAT  
ATACCTATTTAATCCATTTTTTCAATGGGCTCAGAGTATAAAAAAAGTAAGTTCCTTGGCGGGGTTTCGAGC  
TCGCAACTAACTGAACCACTTGCCACCGACTCCACTCAACAACCAAACTAATAATCGAGTATTAGTGAGA  
AACAAAACAATTAACATAGTAATACGAACAACAATACAATCGCAATTTTAATTCTGTTAATAAAATACGAA  
GCAGACGCGCATAAATTGTGTGAGTACATGCATACAGATATTATTCGAATTTGCGCTGGTGCCGCAAACA  
CGTGTTTCTTAATCGATCTTCATTATATTTTCTACAGTATTCCTCAATATACCATAGAATACCTGTGTATTC  
TTTAAAAGTAAATTGCATTAAAATTGTAGTTTTAATTGGTGAGCAAAGAAGGTTGGATTATTAATTTAATT  
TAAAGCCATAAAGTAGTAGCGGGAAGGTCCCGATAGGTACGTGAATGATACTGGATATAAATATAGTATT  
CTAGTAAACATGTCAATTGTGGTGGATCTAGCTCTTATTGTTTATTCAATTTGCTGAAAATTCGGATTTCTGA  
TATCGATTTGTATTGATTGCTTGGNAACGGAGGAAGTTATCGATTATCGGAAACAAACTCGATCTGCGCAT  
GTACTAGCGGATCTACACCTATAATTTACATCTCTAGCTCTTATAGTTACTTAGATCTTGC GTTCATACAC  
TGGCCATCGCCTCCTCTCAACAACCACACTAATAATCGAGTATTAGTGCGAAAAAACCAATAACATAATA  
ACTCAGAACAATACAATCGCAATTATAATGCTGTTGATAAACACGAAGCAGGCGCGTATAAATGTTTGTG  
TNCGTGCACGTGCATACAGATATTCTTCGAATTTGGGCTGGTGCCGCAAACACGTGTTTCTTAATGTCTTC  
CTGAAAATTTCTACGGTATATCNTAATATACCATAGCATTGTGTATTCTCAAAAGTAAATTGCATTAAAA  
TTGTGGCTTTAATTGGTGATCAATGGGAGTTGGGTTTGTACGGGGCGAAGTGAAAATAGCTGTTGACTAA  
GTCCTACTGGGTCTCGCATTTTTTCTGTAAGCAGCCCTCGCTGCTTACACTGGAAGCGCACCGTTAGAATTA  
GTTTTTACATGATAAGTCGATCGCACGCAGCTGCACAAGCTGCATTTTTTGTGCGAGGTTTCATTTTCGTTTTGT  
GCTTGCAGCTGAGCAGAAGTGAAAGAGAACAGAAGCGCGTGCGGAGCACGAATGTAAGTCTCATAATCA  
TGTAATAATATAGGTTGTTAAATAATGAAAGAATAATAAAGATTTTCAGCGTTCTGAATTATATTATATCGTAC  
CGCCTCGTACGAATCGAATTGAATCGAGTTGTTTCTTTTCGACGCTAGAAGTCCCTGCCGAATACGCGCCCC  
GGCACGAGTCTCGGTGCCAACATTCTGAAATATTCTCTGCAGCAGAGAGTGTCCGAGGGATTCTCTGCTAC  
GGCGGAGATTTCTGCGAAGCAAGCGACTTGCAAAGTCAACACCTTAGCTGCCTATAGAGAGACACGTGGT  
ACAAGAGCTAGACTCACACCTAGCAGCCATAACCTCAAAGCGGATTTCATAGTATTGGTGTGGCGAGATG  
GCTGACGGTGATGAACAAGATGCAAGTGCGAGAAGGACGACAAGTAGTATTCAACCCGGTGGAAGTGA  
ACGCTTGTAACGGCATGGTCAACGGGACAGGCTAACGGATCGCCTGTTCTGCTGGAGTACAAGATAAAG  
TCGCCGGCGTAGAAAAAGGTAGCGGGGCAGCAATCATAGAACTTATAGCGGCTGTCCGTCTACGTCGTC  
CGCTGCTACTGGTCCAAGGGAAAGTTCAACACCAACGCAGCAAAGAACTGAGAAAGTGGGAGCTCTTTTC  
GACCCTTTGGGATACCAGAACGTGATCTACAAGCAGAAACAGGTTGCGGCTAATTGGAGTGTACACCCCA  
GTTTGCCATATCAAGCAAATACGGCGGTGTTTAACCAGGCTACGGAGCCCAGTACTGCCGCGTACATGGG  
CCACACAGGTCTGGGAGCGCTCAATAGATCGATTGAGCACGTGCCACGGCAGCAATTTGACAATGTGCAT  
TGTAATAATGCGACGCCGTGGAATGGATCGCTGACACCTGCGCAAATCAGCGCGCGACATGTCATCAGCA  
AAGATTTACCAATTTTTTACAGGCAAACCAGAGGAATGGTTGATCTTTATCAGCAATTATGAGCAATCCAC  
AGAGAGATGTGGATTCAGCAACGAGGAAAATCTCATCAGGCTTCAGAAGTGCCTCAGAGGGCAAGCCCT  
GGATGCGGTGCGCGGAAACTTATGATCCCAGCTACAGTGCCGTATGCTATAGGCACATTGCGAATGTTG  
TATGGCCGCTCTGAAATAGTACATGCTGCTCTGCAGCAAAAGCTCCGAGAGGAACCAGCAATAAAGTCGG  
ACAACCTTGAACACCGTTATCCGACTGGCCCTAGCTGTCCAAACTACTGCGCAACGATAGCGGCCATTGG  
TATGCACGAATATCTTTACGATCCCGCGCTGCTGAACGAGCTTGTTGCTAAGATGCCAGCAATATGAAAT

TGGATTGGGGCCGGCATCGAATGTCGAATGAAGGTAGCAGTTTGGCCACCTTTGATAACTGGCTGTTCAA  
TGTGGCAATGTGCGCCACTATGGTCACGCCCTACGAGACACCACTGGCTGGTAACGAAAAGAAGAGCTCC  
ACGAAAACCACTAGAGAGCGAATTTTTGTGCACAACACGGTAGATAGCCCTGAGGGTTCTCAGCAAACAA  
CGTTCACAACAGGAACAGGAGAGGGTTTCATGTGCGAAGTGCGCCGGTAACCACCGTCTATCAGATTGCG  
ACGACTTCAGATCAATGGGTACAAATCAGCGCTGGGAACCTTGTTAAGGAAAAGAGGCTCTGTTTTTGCTG  
CTTTCTACGTCAATCGTGCACAACAGTGTAATCAAAGAAGAAGTGTCATGTAGATGGTTGCGAGTCAACG  
CACCATGTGCTGCTGCATACGCCTACCATGAGTGGTAGTAAAGTCGAGCACACGGGCCAAGGTAGCAACC  
ACCGGATTAAGGCAAGTGAGTCTGCCGTTATGTTTCACGGCAGCTCCGCAAGTAAGACACTGTTTCGATAT  
GTTCCAATCACGCTCTATAGTAAATCAAAAAGCGTGCGCGCATATGCATTAGTGGATGAAGGAGCTGAGT  
GTACGTTAATAGAAAGAGCGCTTGCGAGACGAGCTGGAATTAGATGGTCCTGCGACCCAGCTGTGTCTTAA  
ATGGACAGGGGACATAACCAAGAATGAACCTGAGTCGATGTCCGTGGCTGTGAGCATTTCAGCTCCAGAA  
CATAACGCAATACAGTATGCCTTAAAAACGTGCGAACAATAGCGAACTTGGACTTACCAGAGCAAAGTA  
TCGGGCCACAGTTGCTCAAGTCTCGGAAGCACTTATCTACGCTTCCTATTCTGCCGTATAACAACGTCAAG  
GCTCAGCTTATCATTGGTTTACACAATATCAAAATAACTGCACCCTTGAGAGATACGAGAAGGTGAAAACG  
ACGACGTCATAGCAGCGCGAAGCAGACTAGGATGGGCCGTATATGGCCGCCCCATTGTGGGAGACAGCA  
CCACGCCTCGGCTGCTACATATTTGCCAGTGCAAGTGCGGCGCGTGCGGATGGATGAAGCTCTGAAGAATA  
TTTTTCAATTGAGTCACTAGGTGTGAGCGTTTCTCACATCCGCTGAGATCCAAAGAGGACGAACGCTCGA  
TGCAGATTATGGAGGCAACAACAACCTATCTGGAAGACGAAAAGCGCTGGCAGACCGGCCTGTTATGGA  
GGTTCGATCGCATGCACCTGCCAGACTCTTATCAGATGGCTGTAAAGCGCCTGAAATGTTTAGAGGCAAA  
GATGTCAAAGAGCCCACTGAAAGAGTTCATGATGAACACGATGCACGATTACAAACAGAAGGGATA  
TATCCGCCGGTTGAAGGATAGTGAGTTAGTAGCTAACACTACATCGTGGTTTCTTCTATCTTTACAGTCA  
CCAATCCGAACAAGAAAAAGACGCGCCTGGTTTGGGATGCGGCTGCCAAAGTTAGTGGCATGTGCGTGAA  
CGATTGTTTGTGAAAGGTCCAGATACACTAGCATCTTTGATGGGGGTGCTAATACGCTTCCGAGAGCGTC  
CTATCGCAGTATCCGGCGACATAAGGGAAATGTTTCATCAAGTCAAGGTGCGCCNAGAAGACCAACCGGC  
ACAGAAGTTTCTCTGGCGTGATGGAGATTCGTACGCTTCCCCGAAACATACGTTATGCAAGTCATGACGT  
TTGGAGCATCCTGCTCGCCAGCTCTAGCAAATTACGTCAAGAATCGCAATGCCGAGCGGTTTGTAGCGGA  
GCATCCGGATGCCGTAAAGGCGATTTGCGAAAACACATTTGTCGACGACTGGCTGCAGTCGGTGGATACT  
GGAGCTGAAATGATACAGTTAGCTGAGACTGTAAAAAGGATTCATGCTAGTGGCGGCTTCGAGATGCGCC  
GCTGGACATCAAATTCGAAGCAAGTTATACAGGCGCTGGAAGACGACTGTGAGGAGTTGGACAAGCGTA  
TCAGCGCTCAGGATGAAGCGCAAGAGAAGGTCTTAGGCCTGTGGTGGCTACCTGGACAAGATCTGTTGAC  
GTTTGTGGTGACGCCGAACCTTGCTCGCGAAGGCATCTAAGGAGCGCCCACTAAAAGACGTGTTCTGAGT  
GTGATCATGTCTATTTTCGACCCGCTCGGGCTGCTAGGATTCTTTAATATACGCGCTAAGATCATCCTTCA  
GAACATATGGCGATCCAATATCGGATGGGATGACGACCTACCAACGAAGACGAAGCCGATTGGCAACA  
CTGGCTTGATCTANTTTCAAATTTGAATGCCGTCCGCATTCCACGGTGCATGAAGTGGGTGAGCCGAGCCC  
AGGCTGTGCAGATGCATACATTCGTTGACGCCAGTATGAATGCTTACGCCGCAGTTGTATTTTTGCGGGCT  
GAACTTGATGGCCAAGTACATTGCAGTTTGGTCGCCTCGAAAACGAGAGTAGCACCCCTAAAGCCCGTGT  
CCATACCTCGAATGGAACCTGATGGCCGCGGTCTTAGGTCTGAGACTGGCCAAATGTATCCAAAAGGAAAT  
GTCGGTACGCATACATAGACGAACATTCTGGACAGATTCAAAGGATGTGCTCTACTGGATCCGTTCCGAT  
GCTCGAAAGTTCCAGCAATTCGTAGCGCTTCGGATAGGAGAGATTTTAGAAGAATCAGATGTGGACAGCT  
GGCGATGGGTACCATCGGCTCAAAACGTGGCGGACGATGGTACGAAATGGACTAAAACGCCTGAAATTC  
ATGGCTCAACCAGGTGGTTCAATGGACCACCATTTTTGTATCTAGAAGAATCGCAGTGGCCACAATCGGA  
AATAGGCCCTGCATTAAACATGTTGTACCATGCTGAAGAACAACCCAATCACACGTCGTCCTGGAGATGT  
ATTCTGCCGGATCTGCAGCGTTTCAGCAAGCTAGAAAAATTGAGAGCCGTACAGCTATGCGTACTGGATT  
TCCTACGGAATATTACTAAGAAGGTCAGATTGGACGGAGGACTGGATCTGCAGAAGACGCTGCTCCTTAA  
AAGAAGCAATGAAATGGATGTGATTTTTATCCGGATTTGTCAAGAAGAGGAGTTTTATAGTGAGATCACC  
TGCTTAAGGTGCGGGGCGCCGCTTAACCGATCGCAAAAGCTTGCTGTTTAAGTGCTCCCTTATGTGGATGA  
CTCGGGCATTCTACGTATTAAAGGACGGATAGACAATATAGAAGGAGTCGAAGTCTGCGTAAAACGCCCC  
ATAATTCTGCCAAGACGACATCAATTGACGTATCTGCTGGTTGAGTTTTATCACCGCAGATATCATCACCT  
ACACAACGAAATCGTCGTAAATGAACTGCGGCAGCGGTACTGGGTTTGTGGCTTACGAGCTTTGGTGAGA  
GAAGTTTCCAATACCTGCCAGCGTGCCGCATACGACGCGCCCGCCCAAGCCGCCAGGGATGGGCGACC  
TGCCAATCGAACGATTATCGCCCTATACTCCACCGTTCACATATACTGGAGTGGATTACTTCGGCCCCCTAC  
GACATTGTCGTTGGACGGCGTCGTGAGAAGCGCTGGGGCGTGCTATTTACATGCCTCACGGTGCGCGCCG  
TTCACCTGGATATAGCTACGTGCTCTCAACTGACTCATACTTATGCGTTCTGAAGTCGTTCTGTGGCCAGA  
CGCGGCTGCCCCCGCCGCATGCTGTGCGACAATGGCACAAATTTACAGAGGCGCTAGCAGAGTATTAAG

ATGAAATTGAACGTATATCGCCGGCTCTGATCGAGCGACAGTACCCAGAACTCGAGTTTACCTTTATCCCG  
CCAGGATCACCCACATGGGAGGATCGTGGGAACGAATGGTGCGCTCTACAAAGTCAATACTGTTCGGAAA  
TTCTGCCGCCCTCTGGGTTACGAGAGGAGGTGCTACGAGCAGCATTGGCTGACGTAGAAAGCGTGCTCAA  
CTCAAGGCCACTCACTTATGTTCCCTTGGAGACATCTGAGTCCGAAGCCCTGACTCCAAATCATTTTCTTA  
TAGGTCATTCAAGCGGATTGCGTGAGAGAGGGGAGCAAGGCGGAGCTAGCTTGGCACGAGGCTTCCGAG  
TCGCCAGTCAATTGGCTGACCAATTTTGGGAAGAGATGGCTGCGCGAGTATCTGCCTACACTCACCAGACG  
TACTAAGTGGTTTCAACCGCCACTCGAACCAATATCAGTCGACGACATCGTCATAATAGTGGACGACGGT  
GCCAAGCGAAACTGTTGGACAAGAGGAGTGGTCGTAGACGTGCACCGTTCAAAGGATGGCCAGGTCCGA  
AGTGCCGTGGTGCGAACCGCCGATGGAATTATTACTCGCCCCGCCGTCAAGCTAGCTAAGCTTGACATTA  
AAGTTGGTAACACACTGCACGGACGTTTCGTGAATTACGGGGTGGGGAATGTTACGGGGCGAAGTGAAAA  
TAGCTGTTGACTAAGTCCTACTGGGTCTCGCATTTTTTTCTGTAAAGCAGCCCTCGCCGCTTACACTGGAAG  
CGCACCGTTAGAATTAGTTTTTACATGATAAGTCGATCGCACGCAGCTGCACAAGCTGCATTTTTGTTCGAG  
GTTTCATTTTTCGTTTTGTGCTTGCAGCTGAGCAGAAGTGAAAGAGAACAGAAGCGCGTGCGGAGCACGAA  
TGTAAGTCTCATAATCATGTAAATATAGGTTGTAAATAATGAAAGAATAATAAAGATTTTCAGCGTTTCG  
AATTATATTATATCGTACCGCCTCGTACGAATCGAATTGAATCGAGTTGTTTCTTTTCGACGCTAGAAGTCC  
CTGCCGAATACGCGCCCCGGCACGAGTCTCGGTGCCAACA

>9\_rnd-1\_family-299\_\_LTR\_\_Pao

ACAAGGCATTGCGAGTTATTGCATATGTCTGTCGCTTTATCCAGCGCTGTAGAAATCCAGCGATCCACTTT  
TCCCGCCGAGCTCCGTAATGAAGAACTTACGAGAGTTCAGTTCGACTTATCGAGTATACTCAACGCCAA  
GCTTATCCTAAGGAGTATAGCTGTTTGCTCGATAAGCAGCCAATTCAAGGATCAAGCAGCATTCGCAATTT  
TAACCCCTTTCATCGATCAAAGGGGTATTCTGCGATCCTGTGGACGGGTGAGAGCGTCAACCTCGTTAGGC  
TATGATGAGCGACACCCCATATCATTCCGGCCAATTGTGATTTTTTACGCCTCCTGGTCCGATTTACCCA  
CCTTATTTGTTTTACGGAGGCAATCAGTTGGTAATGCGCCTCATAAGAGCCAAATACTGGATCCCAAAGC  
TCAAGGTCCTGGTAAAATCTACCATAAACTCCTGCAAGGTCTGTGTAATACACCGTAGACGACTCCAGAC  
CCAATTATGGGCGAACTCCCAAGGGCGAGATCAACCTTTTCCCGACCTTCACACATACGGGTGTAGAC  
TTTGCCGGACCTTTCGATATTAAGCTACATTGGTAGAGCATGCAAAATTACCAAGGGTTATGTCTGTGT  
CTTCGTGTGTTTCAGCACGAAAGCAATCCATTTAGAAGCCACCACAGATCTAACCACGGAGAGATTCTTG  
GCCGCATTTTCGCGATTTATCGCAAGACGTGGCCTTCCACAACAGATGTACTCAGATAATGGGAAAACAT  
TTGTGGGAGCGTCATCCGTTCTTTCGAGAGATTTCTTGCAAGCGACCAAAGAGCTCATCTTATCCAAGCAT  
AGCCATCAAAACTTGTGTTGGCATTTCATCCTCCTGGCGCTCCTCACATGGGCGGATTGTGGGAAGCAGG  
TGTCAAAAGCTTTAAGACCCACTTCTACAAGTCCACCGCATCCTCAAAATATACATTTGAGGAGTTCGCGA  
CTCTCCTCTCCAAGATTGAAGCCTGCCTTAACCTCCAGGCCAATCTCTCCAATGTCGGAAGATCCGACTGAT  
TTATTGGCTCTAAGTCCAGGCCACTTCTAGTTGGTGGCCCTCTTCTGTCAACTAACGAGTAATCAAAGAA  
GACGCTATTTCTATAATTAACCGCTGGCAGCGACTCAAAGCGCTCCACCAGCAATTTTGCTTACGGTGGA  
GAATGAGTATTTGAAAGAGCTCCATAAGCGAAACAAATGGCAGTCCCCTACAAGGGACCTCCAAGTCGGT  
GATATGGTGATTATCAAGGAAGATAACATACCAATAAATGAATGGCGCCTTGGCCGAGTCCAGCTGGCTT  
GCCCAGGCACAGATGACAAGGTCCGCGTAGTGGACGTGCTTACCGCTCGTGGTGTCATCCGAAGGCCAAT  
AGCCAAATTGGTCCTTCTTCTACTGAGGCAAATAGCACCACCGACTAATCCTTAAAAGCAACTAATCCCT  
CTTTCAAAACAAAATCATCACATAATAACACCTGTCTTACATCTTATTCTCCAGTTCACTCCTCTGTAGAG  
AACCAGCATGGCACCGTCAACGAAGGCATCCAATCAACGTCAAGGAACGGACTCTTTTAGATGCCGGGTG  
TGTAAGAGGCATCCATGCGCTACGCAAGTGTGACGCGCTTCTTGAAGCTCACGCCCCGAGAAGCGTCTCCGAG  
CCGTGTTAATTAACAAATATTGCTCCAACCTGCCTGGCTCATCAGCATTACAGGGGAATCATGCCGCGAGTGA  
GCCAAGTGCAAAATTTGCAAAAAGGACCACCACACCTTACTCCACATGCGTGATCCCCGTAGCGCTCGAC  
CCTCTCGGTGAGACAACAGGCCCAAGAAGAGCTTCTGGCTCCTCGCCCTCCAGCGGCACATACCCCC  
AAGCCCGAGACGTGCTACTATACGGACGTCGCTTACGTCCCTTCTCCAGCACAAGGGGGTCAGTATATTG  
CCCACCGCCATAGTGCTGCTCGACACCGGAAAAAGACCCTTGAGACTCGGGCTCTGATCGATCCATGTTG  
TTCAGTAAGCCGCATTAATGCAACCGTGGCAAGGGCCTATGGCCTTTCGTCACACGCATTGGCGCAGAA  
GGAGCGTGACAGCCGTGCTACGCTCCAAGACAACCTCAGATGTCTCGAGAAGTGGTCTTCATGGCTGACC  
CGCAACTCAGCTGCATAACTCCAGCCCCGAGCCATCAGAGCGGACATGAAGGACCCGTTTCAGCAACGTGCG  
TTTGGCGGACAACGAATGGTTCCGTCCATCTCCAGTCCCTTTGGTACTCGGCGCCGACGTCTACCCAGACA  
TCATCCTACCAGGTATCCTCCCGAGCCAAGGCGGTCTGCCGATGGCTCAAAATACCAAGTTTGGATGGAT  
ACTCTCTGGCACATGCACGCAATAGGAATCTTGCAATCTGCATATTGCCAGGGGGGAGAATGTTTCATGC  
CAGTTCAGTGCTAGTGTGAACACAGCATTGACTGAGCCTCACTCAGTGTGAGAGAGTCTCACTCAGTGAG  
ACAGACTCACTCACTGAGAGAGACTCACTACTAANTCGATCCCAGATGCGCTCAGCACTCTCCTTGTGGT

CTCCTTTCCACCTCCATCACTCCAACCAAAAATATGTAAAATCACTTAACCAGCAGAGTTTGTACATGCA  
GCAGAACTTCTAATAAAGTGCTTTTTTTTCCACCAACAACAATAATCAAGGATTATTTATCTGACGCCACCC  
CCACAAACATTGGTCCTTCGAGCCGGATTATATATAAACCGATCGCCCCCTACACAAGTTTTTGGCAAAGA  
TAAGTAAATACAAAATTTCTTTCTATATATATTCGGCAATATCCGCCATATTTTTTCCGCCATANTTTTTTT  
TTTTAAGAAAACCTGATTGGCAATTTTCTGAATATATATANATATATATATATACGAATATATATAAACTAA  
AAACAGTTTAGTTAAATTTTGTGTTAGTTACTTCCAACCTACAAAAGAAATCCACTTCAACATTTTTTTGTAT  
GTACATACGTACGCACTCGTGCACCTTCCTAACTATAAAAAAAATTTTTTAATTACGTGTCCGCACTTAAT  
CCGACAAGTTGCTTCACAATATTGTTTCCTAATTAATATTGTTAATTCATGTTCTTGGTCCGACACACAAAC  
ATACACCAGGTTACCAGCACGTATTGTACATACATACATACATATATTCAATCCGAATATAATTGC  
CCATATGCATTTTGAATAGACACTATATTTAACCTTATTATTTAATAAAACATAAAACACAAACTCCAATTCA  
TTCTCTTAACCTTATAATTTGTTGCATNGTGCANACGAATATATTTAGTAAAAACACACAGCTCCCGATCCG  
GTANNTAAATCCACAATTTTGCATAGTGCAANCGNATATATTTGTGTACAACCACATAGTACATACATCCG  
ATAAATAAATNCACAAATCATATGTACTATGTTGTCCACATGCAATATTTTTAGTGCACAATCCACAGCAA  
TATTATAACACAGCAATATTATAGTAATAAAATTGCAATTTCAACCGGCGTATGTGCGTATGTACACACCAC  
ACACATATGTAAAAACNACAGCTGCCGATCCGTACTCCAATTACACGTTTTTATGCAATTGCACACATTCC  
CATACAATTACTCTTGTTCGAGACGCACCAAATAAAAAACACAACAATCATAATTAATAGATTAATAATA  
CTACTAATTTATTGTAAATAAAACAAAAAACTACACATTAACTTCGAAGTTCTACATTTGTGTCAGCGGTGTG  
TACTCAGCCACAATAGTGGGTATTTTATGAGTACCACAAAAAGTAAAAATAAACCAACCGTTACCGTATT  
CAAAGACTAATATAATAATAAAATTATCGAAAACGAGCATCGAATTCTTTATTATTATTTCCCGTGTTTAA  
TAAATAATCGTATTTTTTAAATTACCAAGTCAAATAAATTTATTAATTAATTAATTAATTAATTAATTAAT  
TTGATTTTAAGCAAAATTAATTAATCTTCCGCAATCTCAATCGAATTATAAACTCGATTATTTACCTGTAC  
CGGCATTCCAGTGTTTCTTTGTTTTAAGCATCGCAACCTCTACTACTAGAAACGAGCACCTTTGTTTTCTTA  
CCCAAGCGCTTCCGCCTAGTATGCCAACTGGCAAAGGGGAAGAAACAAAGCATCAATTAGCAGTTCCGTC  
CGCAAGCACCTCCAGAACTTCTCCGTCTCCAACAGCAGCCCTTAGAGTCGAAAGGGAAACATCGTCCCGG  
ACTAAAAGCGAATCATCCGCGTCCACGCCAAGGGGAAGTGTAAAGGCACCTCTTAGTTCGAGGCCAAGTC  
CACTGATAAAAATCAGTCGCCCCGCCGTCCAAAGCTAAAAGCGAAGCATCCCTGACCACTGCAGTCGGACG  
CACTAAGGCAACCATTAGCACAAAGATCTAGTCCGATTTCCACGCGAGCTAATACCAAAACGGCCCAAAAT  
ATGACAGACGCGGCCTTAATCAAGTTTATTGCTGTCACTGATCGGCTAAGTCAGTTTGAGGGCAAAAATAA  
ACACTCCTGGAGGCTCTGACCCGTCTCTNTATACGTGCCAGGTCCGTCGGGACCAAGCGCGAGCCTTGTG  
GGACAAGGTTGAAAAAGAGTACGAGGTCGGCTCAACAATAATCTCGGAAGCCGGTTCCTGGAACCAT  
TTCAGTTATGCAGTCCAAGTACGACTATTGTTACATGGTATATGAGAGATGCGCCGCTAAACTTAGCGAGC  
AAATCGATACCGCTAACGCCCAAAATAGACCATCCGCTCAGTCCACCATTCGACATATGTTCCACAGG  
GTGTCGCTTACCTCCTTGCGACACAGAAATCTTCAGCGGAGATTACATACGTTGGCCACATTTTCGAGACC  
TCTTTACCGCAATTTACATAAATAATCCTAGGTTATCAGAGGTCGAGAAATTATTCATCTCAATGCGAAA  
ACCAGCGGTGAGGCTCAGGCGATTGTATCGAAGTCACCTTTGACTAACGATGGCTTCCGATCAGCCTGGG  
CCAATCTGACTGAGCGTTTTGAGAACCGAAAATTGTTAGTCAACAGCCAGCTCAAGATTCTTTTCAACCTG  
CAGCCAATCTCCCAAGAGTCTGGAACGGCAATTAAGGAACCTCAGAGCACCATTCAAGGTTGCTTAACAG  
CTCCGGAGTTATCCGAAATCAACATAGAAAACCTGGGACTGTATCCTCGTGTTTCTATGTTCTCTCAAATTA  
CCCAAATTAACACTCTCCTTATGGGAACAGTCCATCTCCAGAAAAAAGACATCTCATCTTGGCTTGAGATG  
AACGCCTTTCTCTTAGAACGCTATCGCACTCTAGAAGCGATAGAAGAGCTTAAGCCAAGCGCAAATACTC  
CAGCGCACTCCAGAATTGTTTGAACAGAACCTCCTACCACTAGAAGGCTTAACCTCATTTGAGAATAAGGT  
CGCTAACAAGCCGCAAGCCCGCAAATTGTGCTCCAGGGAGAATCACCTATCCGTCTGTGCCCACGATTT  
CTCCAAACGCCCCGTCAGCGAACGGGCAACTTACATCAAACAGCAAAAACCTATGTTTGAAGTGTTCGCTA  
GGGGTCATCAGTTAAGGGATTGCGCAAGTGCTCACAATTGTTTTACGTGCAAGGGTCGTCACAATACGCT  
CTTGCAATCGTAGTGACGCTCCACAATTGAGCCCTACAGTAGTCTCCATGCCACAAGCAACAGCTCCCTCCA  
ATCAATCCATACAGTCCACTCCATCCCAACAAACGAATGTTTACAATTATGTTGCAATTAACACCCACGGT  
GTTCTCCTAAGCACGGCTGTTATATATGTTTCGCCATTTGGGTGTAAATTATACAGCTCGTGCACGTGATCGA  
CTCGGGATCAGAGGCAACATTTATTTCCGAGCGACTCTTCCACCTGATAAAGCTGCCGTACAAATCCGTAC  
AGGCACAAGTATCGGGATTAAATCAAGCTGTTGCAGCCCAGCCTCGCAAGCTCTGCCATTTTAATATTGGC  
TCTCCTTCCAAGCCTCGTATCCAAATCGAGGCATCAGCCTACGTCTTACCACATTTGGCAGGGGAATCTACC  
ATCATGTTTCGATCCCCCAAAGTTTATTGACAACCCTGCCAAAACCTCCAGTTAGCGGACCCTAATTTCCACA  
AGAGTTTCGAGATAGATGTGCTGATTGGCGCTGATATCCTACCGTCCATACTAACGGGCGGCTCCCATCCT  
AATATATGTGGCACGTTGCTGGGCCAGGAAACTATTTTCGGGTGGATTTTAACAGGGCCAGTTTCAAAGA  
CCGCATCCACCGCAATCTCGTCGTTCTCGACTCGAATATCTGTCTCTCAAGAAGAGCAATTAGACGTCATT

CTCACAAAATTTTGGGAGGTGGAGGACATTCCAGTCAAACCTGGTAAAGAGCTCCGACTCCTTTTGTGAGA  
GTAATTTTCATCCGAACAACAACAAGGAACGAGAATGGCAGATATGTAGTCACCCTACCTTTCCAAGAACC  
TAATCACATAGACTTAGGACATTCAAGATCTATCGCACTAGCTCAGTTTCTAAAGAACGAGAATCGTTTAA  
AAAGAAACCTCCTTTGAAAGAGCAGTACGACTCCGTGATTTCGGGAGTACTTCGACTTAGGTCATATGAC  
ACAAGTCTCTCCAAACAGCAACCCCAATAATTTTACCTGCCGCATCATGCTGTTTTTAAGCCCGACAGCA  
CCACAACAAAGGTTTCGCGTTGTGTTTAACGCCTCCAGCCCGTCTTCCAATGGCAAAAGTCTAAATGATATC  
CTACACACGGGACCAGTACTCCAATCCGATCTGACGATTCAGATACTAAAGTGGCGATTCTACCGCTACG  
TTTTCAATGCCGATATAACCAAGATGTATCGGCAAATCCAGGTTCGATCCAAGACATACGCCCTACCAACG  
AATACTATTTTCGCAATGAGAACGAAGAACTTTGCGACTTCGAACTCAATACAGTTACCTTTGGGGTAAACT  
GCGCCCCATACCTCGCAATCCGGGTCTCCGTCAACTTGCTCGTGATATACGAGAACATTGTCCCATCGCA  
TCCGATATAATTGAAAATTATATGTATGTTCGATGATGTTCTAGCAGGGGCACACACGAAGCCACAAGCAA  
TTTCAGCCATTGCAGAACTCCGCATGGCACTCGACAGAGCTGGGTTCCTCTGAGAAAGTGGACATCCAA  
CACAAAGGAAGTGTTAAAAGGAATACCAAGGGACCACTTACTGTGTGCGGATTTCTTAGAAATCGAAGAG  
GCCAGCGTCGCTAAAACGCTAGGCATTCGATGGCAAGCCACAACAGACCAGTTTTTCTTTGCTCCGTCCAA  
AATGGTATCTCAGCCTTCGCTCACTAAACGTGAAGTACTATCACAGATTGCGAAATTGTTTCGATCCCGCTG  
GATGGCTAGCACCTGTGATAGTTTCGAGCAAAGATTTTCATGCAAGAGATCTGGCTCCAAGAGCTGGGGTG  
GGATGATTCCTGCCGGAAGATCTCGTTCAACGTTGGCATGAATTCCTAACCGACTATCCCTCTCTCGAAG  
AGATCCGTATTCCAAGATGGGTTCGATTTTCAGCAAAAGGCAAAGGTGCAGTTTCACGGCTTCTGCGACGC  
GTCCAGCGCGCATATGGTGCTGCACTTTATTTGCGCGTCGAGATCAACGGATGCATCTCCACTCACCTTC  
TCGCAGCAAAACGAGAGTCGCGCCAGTTAAGACGGTATCACTACCACGCTTAGAGCTGTGTGGCGCCGTC  
CTTCTTTCCGAGCTCACCACGGCTCTTATTCCTCAGCTCC

>9\_rnd-1\_family-333\_\_LTR\_\_Gypsy

TGTAGTGCATATATGCCCTTACAGAATACCCCGTACTTAAACATAAAGTATGCAGCACTTTGTTGCATACA  
ATAGCAATAATATAGTAAACGAGCCCAGAGCCACATTATGTATTGGCTCGGTCTCATATTACGCAGCGCG  
GTTCACTAGCCTCACTAGCTGACCGTTTATGCTTATGATGCATATCCCACGCTCCGTCTGAGCGCATTCGGT  
GAGCAATATATATGCTCACTAATACAGGCATATGCGAGCTACTCACTCTCCCTCTCTTTGTAGCTGTTAAC  
GAATAACAGCATAAGTATATATGTATATCCATAGGCTAAGCGAACATTATAACAAGTGAATAAATTCATT  
CTGAACAAAGATACAAAACAGCACTGACGTGCTGACTTATTTTTCATTGACAATAAGTGCTCATTTTACAT  
GGCGACCGTGACTTGGTCACGCATCCCTGCCTGGAGGAGGNAGTAGACCAAGTGAAAAGGAACTTCATG  
GCCAACAAAGAGGCCATGTATAATATACAATTGAAAAAGGAACTTCATGATCAACGAGAGGCATCCCGT  
ATTCCGAGTGAGTAGAGAGTGAGTGTTATGGTTCATAAACGCGGTGGCTTAAAAAATAAAATTAATAAAA  
GAATAGCGCACCTAAGGTGGCTGCTATACACAAAACAGCCAACACCCGCATGGTTCGACAGCTCAGAAGTT  
ACAAAATGAGCTTGACTATCTGCAAAATGAAATTAAGCAGAGAAAACCAACACCACTACTCACTCAAAT  
ATAAAAGTTCTAATAAACCAACAACCTAATAAAGTTACACCCATTGACGCAACCAGCCTACCAAAAGAAA  
AACGAATGTGCCACAGGATTGCGAAGGCCCACTCGACAGCCCTTCTGCGAATATACGTGCAGACACTG  
CACAGCCAGCACCTCCAAACATTACATTACAACCAACAAATAAACACCTGTGCGAAGACCAGCACCGGTA  
CCGCCAGCGCAACAAGCTGTGCCATCGGAATAAGTGCGAGAGGCACACCGCCGCTTGCGCATACGAGGG  
AGCATCAGCGTGCCACATCCGGCGACGCCAGCTGATGCAACGATGAACAACAGTTGCAGCTATATCCTT  
AACTACTTTTAATTAATATAAAAAAATTTTTGTAAAATTGAGCGGAAACACTTCCGCCCGATTAGCAGCA  
TAGCCCGTAAAGCTATGCGAAATGCTAAGGTAGTATTTTGTGTTATAAGAAATATTGAAACCTTGATTCTA  
AAAACCCAAGTCAACCAGCACTAACGTGCTTTTGTGAAATCATTATTAATCCAAACATTACCAACATATT  
AAATTAATAGTAATAAATAAAACTTAAAAATTGTAATGCCCGACGACAATTGAGTCGACCGGCAAGACG  
TTTGCCAGTACAGCCATTCGAAACAATAGGTAGGAAAAATACAGATTGTAAAAAATAAATTTTGTAGA  
TGCCTTTTAAGCAGAAAACAAACAAGCAAAACAAAACCCGACTTGTAACAAACGAAAAGCATCAAATTC  
AATAAATATAGTAATAAAACCTCAAATGAACGATACAAACAACAACCTTGTCTTGTAAGTAAACGAAAAC  
AAATTTAACATTACGCATTTGTAAATTTTTTAAGATAATTCCTCTAAACTTTTATGNACGATCCCANACAA  
CAAATATATGAATATTAATATCAAAAAGAGGAAATTAAAAAGTTATAATTTCGTTTCAGTTGGATATAAAGA  
AATGTGCTGTCNCATTAGGTAAATTCAAAATTATGATCAAGAATTAGCATGATCGAGGACAAGATTAACAA  
GGTATATAACGACTATACAGACTTTTCGTATGCGAGCCATACAAATTTTGCAAAGGCATAGAGAATTCATA  
CCAGTATATGAGTTCGAATACGAATATATAGAAACATTTCGGCACAGTGACAAGTCCACTCTATTCATGTTT  
TAAATAGAGNGCGGAATAATCTTGTCCCACTACCCTACGTCAAAATAAAAAACAATTATTGACGAGCAT  
CCGATTCTAGGGCAGACAACAATTGTCTTAGTACGTCTGCATAGGTAGTAGTCAAATCAAAAAGCAAGAG  
TATTTATATAGGAATATGGGGGAAAANAATCAAAGGCAGATGATAACACTGCCAATGTAGTTAACGTAGT  
AGAAGTCGTAGACACCACTCCCCATGTGCAGTTAACAAACATACTGCTAATAATACTCATTGTAATAGCTT



CAGTAAACATCCTTCTGAAGATTTATCTTCTTCATAAAAATCACTGAGGAAGCGTTACATGAGTCGAGCCA  
ACGACTTAGACAAGGTCTAAGCCACTGCTTAAATAAAATATTTAAGTAGCGGAAGCTTACATGGACTGGT  
CCCAAATAGTAGAAAAGATAAAGCGGCATAGGGAAAATTTGATAAAATCATACAAGTGCCTTAATAAAA  
GCGCACCAGTTTTAAGACCCACCATAATTAAACATACTGAGATCCTTGTATATGAGTACAATGAAATCAG  
GAGTCTAGTTACCGAGTGTCAAATAAACTGACAAGTTTACACAGAGTCCAAACTTCAGACGTTTTACAG  
CGTCTAAGGGATAATCTGGTAAACTTAAATAAAAAAGTATGATCTCCAGCTTTATCTACCATCGGTGTTAAA  
TACACCGGTAACATTTGATAAGTCACTACTGACAAACGACCAAATAGAAGATACAAAATTAGTAAACATG  
GCACAAACAGTTGTAGAATTTATCAAGCTAGCCACATCTCTGATACCAGAGTTTGACGGTAAGCCGGAAA  
ATCTACAAAGTTTTCTAGATTCTTTGAATCTATTAGAAACCTTAAAAGGCACACATGAGCTAACGGCCATA  
AGCCTTATAAAAAACAAAGCTAAAAGGCCATGCGAGAAATTTGATAAGTAATGAGCAGACAATTGCTGCA  
ATCATTACGCAACTATCAAATGCAGTAAAAGGAGAATCGGTAGAAGTTGTATCTGCTAAGCTTCTTAATTT  
GCAACAGAAAAATAAAACGGCTAACCAATACACCCAAGAGGTGGAAAAACTGGCAAAGGCCCTTGAAGG  
CGCCTATATCAGTGAAGGTCTAAGCCAATCACTTGCAAACAAATACAGCACTACAACAGCTGTAAAAGCT  
ATGACCCAAAATTGTTTCGATTGATAAGGTAAAACCTTATCATGCAGGCAGGCACATTCACAAATATGAATG  
ATGCCGTNTCCAAATTTGTCAATAGCTGCACGGAGATAACAGGTCAAAGTAACACTGTCCTGTATTATCG  
ACGAGGTGCAAACAACAATAATAGAGGAGGCCGAGGTTATAATCGTGGCAGAAATTACAACCACAACAA  
TTATAACCGAGGCGGTAACAACAATAACAATAATTACAATAACCGTGGAGGAAGACGAGGCCAAAATAG  
AGGAAGAGGCCGAGGTAACTCCAACCAAGGTTATAATAGTAACAATGTGAGAATGGCGCAAAAATACGCC  
GGAAAACTCTCAGAACCCCTTTAGGAAACAACCAGTAAATGTAAAGGTTCAATCCATCAATTACAGTCTTA  
ATATATTTGTCACCTTTTTATAATCATTCAACTGAAAATAAACTCACATTCTTAATAGATACTGGTGCAGAT  
ATCTCACTTTTTAAAAATAAATTCAGACAATTTCAAAAATTCAAGAAGAAAAAATTATAAACATCCAAGGCA  
TAGGCCAAGGTGTAATAAAATCTCAAGGAACAACCTTCAATAGAACTTCAATCNACAAAATATATTATTCC  
ACACGAATTTCAATTTAGTAGATTCCGATTTTTCAATACCGTGTGATGGAATAATAGGCATTGATTTTTATTA  
AAAAATTCAATTGTCAATTAGATTTCAAACCAAGTGAAGACTGGTTTATAATTAGACCTCAAAATTTAAAT  
TATCCAATTCATGTTCCGATAACATATAGTGCTGGCAACAATACAGTTCTCTGCGCCAGCCAGATCCCAAGT  
AATTCGAAAAATAGACATTAATACAGTAAATGATTATATATTTGTTTCTAATCAAGAAATACATAATGGA  
ATTTATGTTGCAAATACAATAGCAGCATCCAACATGTATACATTGCCCCCTTCTAAACACAACCTAATTTT  
GACCAATTGGTCAAAGTAAACAAAATCCAATATGAAAATTTAACAGATTACGACATTCATAGCACTAATC  
CAGAAAATAGAAGCGAACAAAGTACTTTCAAAAATTAAGAAAAAATTTTCCAGAACAATTCAAAAGTCAACT  
AACAGAATTATGCACCAAGTATAGTGATGTTGTTTCGGACTGGAAACCGAACCAATAGCGACAAATAATTT  
CTATAAACAAACATTAAGACTTAAAGATGATGAACCCATTTATATTAATAAACTACAGAAGCCCGCATAGC  
CACGTAAAGAAATTCAAAAACAAGTAGGGAAATTAATAAACGACAAAATCGTAGAACCGTCTGTATCC  
GAGTATAACAGCCCACTCTTGTTAGTTCCGAAAAAATCATTACCAAATTCGGAAGAAAAGAAATGGCGAT  
TAGTAATTGACTATCGCCAAATCAACAAAAAACTACTTTCTGATAAATTCCCGCTCCCCAGAATTGATGAT  
ATTCTAGACCAACTGGGCAGAGCTAAATACTTTTCATGCCTTGACTTAATGTCAGGTTTCCACCAAATTGA  
ACTTGAAGAAAATTCAAGAAATATAACATCTTTTTCAACGAGCAATGGCTCATATCGCTTCACGCGATTAC  
CATTTGGTCTTAAAAATAGCACCAAATTCATTTAGAGAAATGATGACTATAGCATTCTCGGGTTTAGAACCC  
TCCCAGGCATTCTTTATATGGATGACTTAATGGTGATAGGATGTTCCGAAAAACACATGATTAAAAACTT  
AACTGATGTTTTTAATGTATGTAGGAAATATAACCTAAAGTTGCATCCAGAAAAATGTTCAATTTTTATGC  
ATGAAGTGACATTTTTAGGTCACAAATGCACTGACAAAGGAGTATTGCCAGATGACAAGAAGTTTGACGT  
CATCAAAAATTATCCTGTCCCTCATGATGCGGACAGCGCGAGACGATTTGTAGCATTCTGCAATTATTATC  
GTCGATTTATAAAAAACTTCGCCGATTATTCACGGCACATAACTAGATTATGTAAAAAGAATGTTTCTTTT  
GAATGGTCAAGTGAATGCCAAAACGCATTCCAATACCTTAAAGAAAAGCTTATGCACCCACATTATTAC  
AATATCCTGATTTTCGCAAAGAATTTTGCAATTATAACAGATGCCAGTAAACAAGCTTGCAGGAGCGGTTCTA  
ACTCAGAACCGTGACGGAATTCAGCTCCCAATAGCTTATGCATCTCGTTCAATTTACAAAAGGGGAAAGCA  
ATAAGAGCACAAACAGAACAAAGAGTTAGCGGCAATTCATTGGGCAATTACCCATTTTAGACCATATATTTA  
TGGCAAACACTTTACTATTAAAACGGATCACAGACCATTGACATATCTTTTTTCTATGACTAATCCCAGTT  
CNAAATTAATCTGCATGCGGCTAGAGCTTGAAGAATACGACTTCACAGTAGAATACCTAAAGGGGAAAG  
ATAATTTCTGATGACGACGCACTTTTCGCGTATTAATATAAAAAGAACTCAAAGATATGCAACATAAAGTCCT  
GAAAGTCACTACCAGGCGACAAAGTAGACAAAATAAAAACTGTACAGTAGAAAATTATGAACTTCTGCC  
AAGGCAAAGTCATAAAAAATGTATCCAAGCCCAACGTACATGAAGTCATTACAAATGATGAAGTACGAAA  
AGTAGTGACCTTGCGCATAACAGAATCTAAATGTTTATTTAAACATGGAAATAAAATTATCGCAAGAATT  
GAAGTTAGCGATTTATATACCAATGGAATTCTCGACCTAGGTCAGTTCTTCCAAAGGCTCGAAAAAGAGG  
CCGGTATATTAAAAATCAGCCAACCTCAAAGTGGCACCGAGCGAAAAGATCTTTGAATCAGTTTCAATAGA

TTCTTTTAAAAATATGGGCAATGAAATATTTAAAAATCTTTAAGAGTAGCGCTACTCCAGCCGGTGACCCAA  
ATAAAAGATGAAAAAGAGATACAACAAATATTGTCTACATACCATGACGACCCAATTCAAGGAGGTCAT  
AGCGGCATAACAAGAACGCTAGCGAAAAATAAAAAGACACTACTACTGGAAAAATATGACACGTCATATA  
AAAGAGTACGTACGTAGATGTCAAAAATGCCAAATGTCTAAAACAAAAGACGCACACAAAAACTCCTCTG  
ACTCTCACAGAAACACCTGTGAATGCTTTTCGATATAGTGATAGTGGATACAGTTGGTCCGCTACCCAAATC  
GGAAAAATGGTAATGAATACATAGTCACATTAATATGCGACCTTACAAAATATTTAGTAGCCATTCCAATA  
AAAAGCAAAAGCGCAAATAATGTGCGAAAAGCTATATTTCGAAAATTTTCATACTCAAGTTTGGTCCAATGA  
AGACGTTTCATCTCGGACATGGGAACAGAGTATAAAAACCAGATTTTAACTGATTTATGCAAGTATTTGAA  
GATCAAGAATCTCACCTCTACTGCATATCATCATCAAACATTAGGGACAATAGAACGAAGTCATCGAACT  
TTTAATGAATACATTCGTTTCATACATCTCTGCAGACAAATCTGATTGGGATGTCTGGGTTCAATATTTCACT  
TATTGCTTCAACACGACACCATCAGCAACGCATGAGTATTGTCCATACGAACTAGTATTTGGCAGACTACC  
GAAACAGTTCATAGATTTAAACAAAATAATTACATAGATCCTATTTATAATTTAGATGACTATTCTAAGG  
AAATAAAGTTTAGATTAGAAATAGCATAACAAAAGAGCTAGAATTATGTTAGAAAAAGCCAAGGCTTATA  
GGAAATTAGCATATGACGAAAAAAAAAAAAAACTTTGAATTAAGTAGGAGATAAAGTACTTATAAGAA  
ACGAAACAGGGCACAAATTAGACCCAGTATATTTAGGACCATATATAGTAGAGAAAAATAGAAGATAATG  
ACAACATTTTTATTAAAGATAGTAAAGATAAAAAACAAAAGTTCATAAGAATAGATTAATAAATTTTTAA  
TTCTTAATAATNCAAAATTTCTTTATGAATTCGAACTCAAAAAAAAAATATATAAAATAAAATATGACGGCC  
TGATCAACCGAATGAAAAAAAAAATTTTTTACAAATAAACGAATTATAAATTTTTTATACCTTAAATAATTT  
TTGTATTTTTTATACTCCAACATTTAAAATTTCTTATTATATAAAAAAAAAAATTTCAATTTTTTACAAAAAA  
AAAAAANCCTCAATAATTAAGTTCATTTAATAACTACACATTCATAATGTTACGTTATTTCTCTAAAAAG  
GAGGTGTAGTGCCTATATGCCCTTACAGAATACCCCGTACTTAAATATAAAGTATGCAGCACTTTGTTGCA  
TACAATAACAATAATATAGTAAACGAGCCAGAGCCACATTATGTATTGGCTCGGTCTCATATTACGCAG  
CGCGGTTCACTAGCCTCACTAGCTGACCGTTTATGCTTATGCTGCATATCCCACGCTCCGTCTGAGCGCAT  
TCCGTGAGCAATATATATGCTCACTAATACAGGCATATGCGAGCTACTCACTCTCCCTCTCTTTGTAGCTG  
TTAACGAATAACAGCATAAGTATATATGTATATCCATAGGCTAAGCGAACATTATAACAANTGAATAAAT  
TCATTCTGAACAAAGATACAAAACAGCACTGACGTGCTGGCTTATTTTTTCATTGACAATAAGTGCTCTTTT  
TACA

>160\_rnd-4\_family-338\_DNA\_P

TTGTATGTTTTGTATATGAATAGAAGCATTTATGCGCTTGTGTGCCTGTTGCTTGCCTGCCTGTCCCC  
GATGCAAATTTAACAAGATTTTAGGATTTCTGATTTTCGACCTCTACACACAGACACACACATACAAATGT  
CTGTGGCTGATCCGCCATACTCTACTAGGCCCATCATTGTAGTAAAGCATCATTTTTGTTTCATCATAAAAT  
ATGATTGTCCCAATAATCAATTGGATAAGAAATGTGCATATAGGCGAAGCACAAATCGTTTTTCAATGTTTA  
TTTTAGAAAGGAGCGGTTTCTTGCGCGCAGCTCTTTACTTGTAATCATTGCCAATTATTGCTTGCCTTACTG  
TTTCATAAGAAACCGCAAATTCAAATTTATCATTAGCTCCCTGGGAAGAGCCCTGGTTAAGATCTGAGG  
ATTTAGAGCCACCTTCCTCATCATGAAACGCTCTGTAAGCTCCGCTATTTTAGGCTTAGGTCCGCCTCCTCT  
TCATTTTCAATTCGTTTTAAGACGTTGTATATAGTCTTTTCGTGTAACAGAAAACATTGCTTATAGCTCAAGC  
ACACTTTTTCCCATCTGGTGGTTATAGAATATAAGCTGGACAACCTTCAAATTATAATCTTTTGCCTGGCATC  
TTTTAAAAATCAAATAGCTTCTCAAAGCACGTGATATCATCGAAAAGCATCGCCGAATTAAATGAAATGA  
AATGCATTGAAAACAATGCAAAGCAAAGAATAGATATCGGTAAATGTACCGTTGTTCTTGGAATATTGAA  
AAAAGGGAGAAGGAAAAGAATGTGTAAAGAGTTTCTTGACAGTAGTCAAACCAAAGACAATATAAACAC  
TAAGATGAGTAACGCCCATACATAGCCTGGCCTTTCATCTGGCCTTTGAGGCTTCGTACGTCTTGCCTGCC  
GACTGGTTGTTTCGTTCTCCAAAGACCAGACGAACGAATGCCGAAGTCGCGGCTTGCTGATGCTGACACGA  
GCTACGAAGTTAGTCGCCAGCCTGCCTTCAGCAAAGCTGGTCGATTCTGCTTTGCGTCGCTTCGTTTTCGA  
AGTACATTGAGCGAAAAAGTTTAGAACTTACGATCGACGCAAAGTGCTTGTGTTTTATCCATGAAATGCA  
TGCTTTATTTAAATGATATATTACCCTAGATATTAGCGATTAATTTTACAGGAAAATTTAAGAATTTATAA  
AATTTTTACACAAGGCGCTTCTTGCGCAATAACTATGTTAAGAAAATAGCACACATAGATTGATTTCACTT  
TTCTTTTTTGACAGTGTATGCTCGAGCAAAGTTCTTGTCTCAGCCAATAGCGTGCGTGCACCTTTCGTTGTA  
TGCGTGAATTATACATGCATAAGAACTTTAAGGTATGTGTTGTTATTCACTGCTCTGGCTTCAGCTGGCAA  
GAAATTAATTTTGTGTTGTTTGTAGCGCAGATCATGACCTATCCCAAATTTGTGTTGATATATGAATGCATT  
TTGTGTACTGAGGTTGGCTCCGCAGAAAATATGTATTTCTAAGTCGATGCAAATATTTACATAATTTTTTTA  
AATTGAATTAATATTATTTTATTCTCCAATTAAGAAATAAAAGAGTGCTAAAAAAACAATTACATTTCAA  
GTCGACTCGAAGGTCATATTTAGTTATCACCTATTATAATTATAATGGCCTCCTCGCGGTTTTCCCTGCGT  
ACTTCTTTATAATTCGAACAAAAAATAATAAAATAAAAAANAATAAAAAATTAATTAATGTATCTTTGAA  
AACAAACAATTTGCACTTTTATTTCTTAATTTATTTTGTATTACTTAAAAATAATAATAATTTAATTAATA

ATTTCAAATGTAAAAAATTACATAAATATTTGTCATAGACTTAAATATACAAATTTTTTTTGTACGGAGCCAA  
CCTCAGTACACAAAATGCACCCATAAGTATATCCACAGAANTTTTGGGTAGGTCGTGATCTGCGCTAAAA  
AACNAAGAAAATTGTTTCTTTGCCAGCCAGANACTTTGCCAGAGCAGTGGATAACAACACATTCAAATAT  
GCTGTTATGTATGTATATTCACACGCATACAAACATAATTGCTTGCACGGCCCTCATAGAGCCGAAGCTGA  
GAGCAAATTATATTTTTAGCTTTTTTCGTTCTCTCGGCTGTGAGAGCGCAATGCTACAGATTTTCGTTTTTCGTT  
CTCAATTTTTCAAAAAATCAAGCTGCATAGTAGCATTTTTGTGTATGGCGTTAGTCATCTTAGAGTTTATATT  
GTCTTTGGTCAAACCTGAGTCATTTTTGTATTTGTGTTTTTTTTTTTTTTTGGTTTTCTTATTGTTAACATTTTCATT  
TTGATGCTACTGTTTCATTAAAAATATCATCACTTCCTATAAATTCCCAAAAGCAAGTTTAAAAATGTCAGG  
CGGGTGTTTCATATTTTTAGTCCAATAGATGAAAAAATATATTTTTATTCAATGTGTAAACTCATTCTTGACA  
TACTGTATATACTATAACAATGCTTATACCCTATAATTACAATTATGAACTGTGGGGTAGCTATCCTAGTGG  
CGTCCTCACAAATTTTCTTGTAAGTTATCGTTAGTATCTAGGGTATTATATCATTTTTAATAAAGCATGCG  
TTTCATGGATAAATCAAAAGTGCTTTGCGTCGATTGTAAGTTCAAAACTTTTTTCGCTCAATGTACTTCGAA  
AACGAGGCCATGCAAATCACCATCGACCAGCTTTGCTGAAGGCAGGTAGGCAACTAATTTCTCTGCTCGT  
GTCAGAATCAGAGAGCCGCGACTTTGGCATCCATGTCGTGCGAAATCGTAAAAGCCAGTTTAGAAAGTCA  
GGCTATAAATTTTGC GTTGCATGCAATTGGCGTTACTCATCTTAGTGTTTAGTTTTTCTTTGGTATAGTATT  
ATCGTGAATGTATGTATACACACATATGGTATGTACATGTCTCACAATTATGTACGCATCCTTTGTCGAAA  
AATGTGTAACGCATAGAAGGAGACTTCTCCGACCCCATAAAGTATACATATTCTTTATCAGCATCAACAG  
CCGAGTCGATATAGCCATGTCTGTCTGTCCATCTGTCTGTTTCTATGCGAACTAGTCTCTCAATTTTAAAGC  
TATCTAAATGAAACTTTGCAGAAAGTCCCTCTTTCTGTTGCACGCAGAACATATGTCAAAAAAAGCTGGATC  
GTACCACTATATCCCACCACTATATATAAAATTAAATTGTTGTATGAAAAAACATTTTGTTTTTAAGATAC  
CTTGACCAATCTCGGCATTTATTAGTTTTACTATACTCCTCATATATATGCAAAATCCTATTAAGATCGCAC  
CACTATATCATATACCTGCCTTACGAACGATCGGTGCGAAAATTAAGTTGTTGTATGAAAAAACATTTTGT  
TATCAAGATATCTTAACCAATCTCGACATTTATTAGTTTTATTGTACTCCTCATATAAATGCAAAATCCGAT  
TTAGATCGGACTACTATATCATATATCTGGCATAGGAACGATGGGTTGAAAACAAGTTTTTTGATTAAAAA  
CCTTTCTTGTTTATCAAGATATCTTGACCAAACCTCGGCATTATCTATTTTCTCTGCTTCTAAGATACGGGC  
GAAGCACTATAAGCANTATGACAAGGTTGGGTGCGCAAGGCTATCAGATCTTCGGCGTGNCGCTAAGGCC  
ACTGATTTTATCCGACACGGCATAAGTAAGTCGTGTCACCTAGCTTTAATACCCTACTTCTAATATAAATT  
TGTGCTCATTGAGAGTGAACAACCTACAGCCTGCACGACTTCCCTATTNTTAATTCAAATTCAATATTTGA  
GTAATTCACATTTTTTTGTTTCGTTAACCCCCGCACAGTTTGAGCAAAGGAAACCAAATGAGATCAAGCAAT  
AACGAAGATCAGTGCAAGGCAGCACACTTTTGGCACGTGCCAATGAAAATTTGATTACTACTGACAAATA  
AAGTATCGATGTACATATTTTCATTATGATGTTTTTTTTTTTTTTTGGGTACAACACAGAATAACTTCTTTATTA  
TATAATAATGAATACAACCTCTCTTAATTGTACATAAACATTTAATACATTTTTTCATTGGCTGTGTGTAATC  
GGTTAAGAATTTCTCATGGTGCATTTAAAAATTTAGGAAACAACCGAGAATAAAGAGATGCCGAAAACGAA  
AAATAACGGACAAGTCAATATACAAATACAGTGGTTGTTACATCAAATTAATTGAGTTGGCACTTTGTATT  
CAATATAGAGTTTGTATTTCGGGAGCGGCGTTTTTCGTAGATCCGGTGCAACTCCTGTGCCGGTTCGTATCTG  
GCGTGATGCATCAGAGCTCTCAGCTCTAACAGGTACTCCATGAATTCCTCCCCCTCGCGTTGCCTGCGGGA  
CCGGATTTTCGTCTCAAGCCCTTCGAAGTAGCGTGGGGCAGGAAGAACAGGAAGAAGCAAAAACCCCTC  
CTGAACACCGACCATAGCACATCTCTAAGCCCACCGACCGGCCCTGTGCGAGAACACCTCACTCATCGGC  
CGGGGCAATCTATCGAGGGCGATGGCGCGTTTTCTCTAGGTCTCCAAGAACTCGAGGGGGTTCGGAGCGATC  
ATCGTATCTCATGCCCCACCTCCGAACTTGTTCCGGAGCGTTTTGTGAAAGGCCTAACCTCCGACCGAGAAT  
ATGGTGGTTGGGGCCCCACGCCTACGTTGGTTCGTGGTTGCACGGCGGTCTCAATTTTCTTTGGGATCGGGA  
GCCTCTTCCACACCCGTGACGGCCACACCAGGGATAGGCGGCGCGGACGCCTGTACAATTGTGAGCTCC  
TATGATCAGGCTCTGACTTTTGGCACGGCCGTCCAGCCACGTCAGATGGGACGCCCCAGGATAGCAGCTC  
TAACGTTTTTCGCGAATTGAGACTCCAGCTCGGCAAGCCGAGCCCAGATCTCAGACGAATGGCTGCCCTCC  
TGCACGGAGGTGGATAGCCGCCTACGCAGTTCCTCCACGCACCCCTTCTTATCTAGCCCCGAACCTCCTGGGC  
GATGGCCACCAACTCTTCTTGCGCCGCTGATAGATACAACCACTAACCAAAACAACATATAGACTAGACA  
TGAGTACCAGAAAGTAGGCACAACATGTATCGGAGGCATCTGGTCCAAACTCGCGAGTAAGGGAGTAAG  
ATATACATATGATGTATTTTTGAACCGCTTACTCTACAGGAAAGTGCTTGGCGCGCTCTCTTCCATATGATT  
TGTGCGATAGAAAGGCAACGCTGTTAACTTTTATCTCGCTCGCTCTTACTCTCAGCTCTCAATGCTCTCTCT  
TTATGTTTAGGGATCGTTTAAATGCGTGTGTGTGTATGTGTCCGACAAGCATAACTGCGCAAAAATTCAAT  
TTTTCCCAAATGCTGAGGCATTTCTACCCTTTTGAAGGCACGAGTAATATGAAATAGAGAAAGGGTTTGCC  
ACGTTGTATGCGAAATTTGTCATATTTGGACTCGCTATTCACGCATACTTGTATGTTTTGTATATGAATAG  
AAGCGCTTGTGCGCCTGTGTGCCTGTTGCTTGCCTGCCTGTCCCCGATGCAAATTTAACAAGATTTT  
AGGATTTCTGATTTTCGACCTCTACACACAGACACACACATACAAATGTCTGTGGCTGATCATGTCTGTGG

CTGATCCGCCATACTCTACTAGGCCCATCATTGTAGTAAAGCATCATTTTTGTTTCATCATAAAATATGATT  
GTCCCAATAATCAATTGGATAAGAAATGTGCATATAGGCGAAGCACAATCGTTTTTCAATGTTTATTTTAG  
AAAGGAGCGGTTTCTTGCGCGCAGCTCTTTACTTGTAAATCATTGCCAATTATTGCTTGCCTTACTGTTTCAT  
AAGAAACCGCAAATTCAAATTTATCATTAGCTCCCTGGGAAGAGCCCTGGTTAAGATCTGAGGATTTAG  
AGCCACCTTCCTCATCATGAAACGCTCTGTAAGCTCCGCTATTTTAGGCTTAGGTCCGACGCACCTTCATT  
TCGATTTCGTTTTAAGACGTCGTATATAGTCTTTTCGTGTAACAGAAAACATTGCTTATAGCTCAAGCACACT  
TTTTCCCATCTGGTGGTTATAGAATATAAGCTGGACAACCTTCAAATTATAATCTTTTGCCTGGCATCTTTTA  
AAAATCAAATAGCTTCTCAAAGCACGTGATATCATCGAAAAGCATCGCCGAATTAAATGAAATGAAATGC  
ATTGAAAACAATGCAAAGCAAAGAATAGATATCGGTAAATGTACCGTTGTTCTTGGAATATTGAAAAAAG  
GGAGAAGGAAAAGAATGTGTAAAGAGTTTTCTTGACAGTAGTCAAACCAAAGACAATATAAACACTAAG  
ATGAGTAACGCCCATACATTAGCCTGGCCTTTCATCTGGCCTTTGAGGCTTCGTACGGCATGCCTGCCGAC  
TGGTTGTTTCGTTCTCCAAAGACCAGACGAACGAATGCCGAAGTCGCGGCTTGCTGATGCTGACACGAGCT  
ACGAAGTTAGTCGCCAGCCTGCCTTCAGCAAAGCTGGTCGATGCTGCTTTGCGTCGCTTCGTTTTCGAAGT  
ACATTGAGCGAAAAAGTTTAGAACTTACGATCGACGCAAAGTGCTTGTGCTTTATCCATGAAATGCATGC  
TTTATTTAAATGATATATTACCCTAGATATTAACGATTAATTTTACAGGAAAATTTAAGAACTTATATAAT  
TTTTACACAAGGCGCTTCTTGCGCAATAACTATGTTAAGAAAATAGCACACATAGATTGATTTCACTTTTC  
TTTTTGACAGTGTATGCTCGAGAAAAGTTCTTGTCTCAGCCAATAGCGTGCCTGCACCTTTCGTTGTATG  
CGTGAATTATACATGCATAAGAACTTTNAAGTATGTATGTATGTGTTGTTATTCAGTCTCTGGCTTTAGCT  
GGCAAGAAATTAATTTTGTAGTTTTCTAGCGCAGATCATGACCTATCCCAAATTTGTGTTGATATATGAA  
TGCATTTTGTGTACTGAGGTTGGCTCCGCAGAAAATATGTATTTCTAAGTCGATGCAAATATTTACATAAT  
TTCTTTAAATTAATTAATATTATTTTTATTCTCCAATTAAGAAATAAAAGAGTGCTAAAAAATACAATTA  
CATTTCAAGTCGACTCGAAGGTCATATTTAGTTATGACCCCATTTATAATTATAATGGCCTCCTCGCGGTGT  
TCCCTGCGTACTTTGTTCTTTATAATTCGAACAAAAAATAATAAAATAAAAAAAAAATAAAATTAATTA  
ATGTATCTTTGAAAACAACAAATTTGCACTTTTATTTCTTAATTTATTTTGTATTACTTAAAAATAATAAT  
AATTTAATTAATAATTTCAAATATAAAAAATTACATAAATATTTGCATCGACTTAAAAATACAAATTTTTT  
TGTACGGAGCCAACCTCAGTACACAAAATGCATTCATATATATCAACAGAAATTTTGGGTAGGTCGTGAT  
CTGCGCTAAAAAACTAAGAAAATTGTTTCTTTGCCAGCCAGAGACTTTGCCAGAGCAGTGGATAACAACA  
CATTCAAATATGCTGTTATGTATGTATATTCACACGCATACAAACATAATTGCTTGCACGGCCCTCATAGA  
GCCGAAGCTGAGAGCAAATTCTATTTTAGCTTTTTTCGTTCTCTCGGCTGTGAGAGCGCAATGCTACAGAT  
TTCGTTTTTCGTTCTCAATTTTCAAAAAATCAAGCTGCATAGTAGCATTTTGTGTTATGGCGTTACTCATCTT  
AGTGTTTATATTGTCTTTGGTC  
>9\_rnd-1\_family-115\_\_LINE\_\_R1  
ACACATACACACACACACACACACACACACACACACACACACACACACACACACACACACAGTGGGACGCG  
AGATTGTTTTCATAGAGTGCGGACGCGATTTGTAAGTCTCCGTGAAAATAAACAAATAAACCTGTGAAA  
TTAAAGTGAAGTTAGTGCACGTGTGCAGGGAACCGAGACAGGCCTAAGACACCAAAGGTGCGTGGTGG  
TACTCACTGCGAAGCCCGTGCAGACCATTCTGGGGTGGCGTCTACAGTTCCACGATCCAGGCGAGGGGA  
GTGGAGGCGTCTACTTGGCGTGTTTGTGCGCTTTTTGTGAGTTTTACCACTCAATTGTATTAGCCGTCTCGC  
AAAGCTATTTGTGCAGTTGGTTGCATTCCTCTAACAGCTGTTAGTAGTGTGCTAGCGCAGTTCACAAC  
CAGCTGATCTGCACTATAGAGCCAGCTGCCAACTGCGTAGCGGAGATACCAACCAGGCGATAAGCGGTA  
ACTGGCAGAAAAGTACAGCATACTTTTCGGGCTTACGCTGTTCTTGCTAAGCATTTAAGCTTTGGAGAAAGA  
ACAGGCAAAGAAGCCGATATCGGTGCTCACTACAGGCTCCAGGGCAAAAAAGGAGCAAAGGTGCGCGGA  
ACAGACCAATTTCCAACCCCCGCGCGGGTGGCCATAAAAACGGGGCTCTGGTGACCGAGTCGGAGCG  
GTATAACTCCCAGCGGTTAATAGCCAGAGGGAACCGTTGGCCACCGAGGGACTTTCCTGTAGAGCCCTG  
ATAGTTAGAGCAGGTGCCAGAGAAAAATGGAGGATGAGCTGCATGCCTTTGCGCGCCGCTCTGCACTAC  
AGCGATCACCGTCACACCAGGCGGTCACGCCAGTGCAGCAAAGAGTGGCTGCGTCGTCGCCGGCAAAAG  
CGAGTGAGGAGCTGCCAAGAACGCTAAGAGGCACGATCGAGAAGATGGGCTTAGTCCTAAACGGCTTAA  
CGGCGCTGTTCAACGGACAACGCCACATTAACGGGCTGATGCGAGAGGAACTCGCGAGAGTAGAAAGCC  
TGCAGAAGGTGGCGCTCAAGCTCTGTGCGCCGGAACGAAGTGCAGACGAGGCGCAAACGACGCCGTCTCAT  
TAGCCAGACGTGCGGAGCCGAACGTGCTAAAGACGCGCCCAACGAAGCTCGGGGGCCAAAAAGAGGCAA  
GCACGCCCAAACGGCCGAGGGATGGCGTGCCAGAGCAGCGCAGAACCCCTCCAAGAAGGCTAAACGCC  
AAGGTCAAACCCAGCGAAGCAGGCGCTGCTCACGCATCAAAGACAGCCCTGCCAACTCCAACCTTAG  
CTGGCCATAATGGCAACCCAGAGAGCTGGACAGCAGTGAACGGACGTAAGCGGACGCAGAAGCGTCCCA  
GAGCCGACGCCATTACAGTCCACGGAGTGGGTGACTGCACATATGCCGATATGCTCAGGCTCGTGAAGAG  
CGACCCGGCCCTCAAGCACCTAAGTGGCGATGTGCATGGCATTTCGAAGACCGCGAAGGGCGATCTTCTG

CTGCGCCTCAATAGGAAGCCGGAGCACTCCGCAGATGAGCTTCAAGAAGCTGTGGGAAAGGCATTGGGT  
GACCGGGCGGTAGTAAGAACGCTAACCGAAACGTCCCAGGTGGAGATCAAGGACCTGGATGAGCTGGCG  
ACTAAGGAGGAAGTGCTCGAAGCGATTAAAAGTGCCTTACAAGACGATTCCTTGCCGATTGAAACGATCA  
AATCGCTGCGACCAGCATTTGGCGGCCAGCAAAGGGGCCACAGTTACTCTCCCAGCGCCAAAAGCCAGGAC  
GCTTGTCGAGAAGGCCAAAGTGAGGATCGGATGGGTTGTCTGCCGTATTCGTGCAATAGACCAACCAAAG  
CGATGCTTTAAATGCCAGGGTTTTGGGCACATTGCGGCGAACTGCACCAGCGGAGACGATATGAAAGGCG  
CATGCTTCAGATGCGGGGACACAGGTCACGAAGCAAAGAGCTGCTCCAAGCCACCAAAAATGTAGCCTTTG  
CATACGGAAAGGAGAAAAATCAACGGACCACGCTACAGGAAGCTTTAAATGTCCGGCGTATCGCGAGGC  
AGTACGCAAAAATGAAATGTTAAGGTTACTCCAAATAAACCTTAACCACTGCATAGCTGCTCAAGCCATCT  
TGGAGCAGACTGTTAGGGAGATGCGCATTGATATTGCCATTATCAGCGAACCCACCACCGAGAAACCAA  
CTGCCCCGAGAATATGGACCGAGGATCAGGATGGAAAAGCTGCGCTCTGGGTATGTGGCGACCCATCGACA  
TCGCTGACAAAAACAAAGTCCTTCACTGGGTTTTGTACGCGCACAATACGGCAGCCTGTGGATATACAGCT  
GCTACCTGGCCCCAAGCATGCAGCTCTGCGAATTTACAGCTGCATTAGATGCATTAGTAGATGACGCAAG  
GGGGCGGAAGGTCATTATTGCTGGTGACTTCAACGCCTGGGCAGTGGAATGGGGCAGCCAAGCAACTAAC  
GCAAGAGGTCGTGCCCTGTTGGAAAGCTTCGCAGCCCTAGATATAGCCCTGCTAAACTTCGGCTCGGAAA  
ATACCTTCACTCGAGGTGGTATCGGATCCATAATCGATCTTACCTTCGCAAGCTCGTCACTTTTTAGCGCA  
ACAAAATGGCAACTAAGCGACTTATACACCGCAAGCGACCACTCCGCAATAATATGCACGATTGGTGAAG  
GAACTGCAGCCAGCACTAGAAGCCTAAGTCGGAAAGCTTACCGCCTGGATACTTTCGACCCCGTGGCCTT  
TTCGAATGCAGTCCACTCGCTTGTCACTGCCGGCAACGCAGAGAGAAGAGCCTCCCAAATGGCATGCCAG  
CTATCGCGTGCCGTGTGACGAGAGCATGCAAACCCGGAAAACGTTTCGGCGCCACCATGTACCCACGTACT  
GGTGGAACGAAAATATTGCCGAAGCACGGCGGAAGTGCATCCAAGCCAGGAGGAGATACCAGCGAGCCC  
GAGGTAGACCCAACATATGCCGAACAGCAGCTAAGGTATCAGAGTGCCAGAAAAATGCTAAAAAGTCCAT  
AAGAGATAGCAAACGAGAATGTTTCCTGGAGCTATGCGACTCAGCCGAATATGATCCTTGGGGCAAGGCG  
TACAAAACGTGTCGTTAAAAGACTCTACGCCGGCAAACAAGCGCAGCCTTCTGACCCAAGTGAGCTGAAGT  
TGATTGTGGAAACGCTATTCCCAATCAGACCCGACGTATTACACACGCAAGCCATACCATCGAGCCACGT  
AGCAGCCATGCCGTCTCTCATCGACGAAGTCTCAGTCGAAGAGGTGCTGACGATCGCCAGAAGCCTAAAG  
CCCAGTAAGGCACCGGGTCCGGACGGAATCCCCAACCGAGCACTGAAACTAGCCATGTCCTTGCAGCCCG  
CGCAGTTCGTGCAGCTTTTAACATGTGCCTAATGGAGAGAAGTTTCCCCACAATATGGAAACTCCAAACG  
CTAGTTTTATTACCGAAGCCTGGTAAGCCGCCCGACGACCCATCGTCATACAGGCCGATTTGCCTCCTGGA  
CACGTTAGGCCAAAGTGCTGGAGAAGCTAATCTGCAACAGGCTTCAGGTAGCTGTGACACAACAATGGTGGC  
CTGTCCCAAAGCCAATTTGGTTTTACCAAGGCAAAGTCTACAATAGACGCTCTGGAGAAAGTGGTTCGGCA  
TAGCAACAAACGCCATCCAAGGATCGAGATGGAAAAGCGGCACAAAAAAGTACTGCCTCATCGTCACGC  
TGGATGTTAAAAACGCCTTTAACACAGCCAGGTGGGACAAAATATTGGATGCATTGTCAACGTTCCGCGT  
CCCATATTATCTTCAGGAGACGATACGCAGCTACTTCACTGGAAGACTGCTGCAATACGACACCCGCAGAC  
GGCCCCACTACACATCAAGTGTCCGCTGGAGTGCCCCAAGGCTCAGTTCTAGGACCCCTCCTCTGGAACAT  
CATGTACGATGGCATCCTCCGACTGGAAGTCCCGATCGATACAAGTATCATCGGCTTCGCGGACGACGCTG  
GCCCTTGTAAGTCGTCGGCAAGGAATTGAAGGACGTAGAGGAATCGTGCAACCACAGTATTGACCGTGTGC  
ACCAATGGCTGGCAGCAGCTGGACTCGAGCTGGCTGCTCACAAAACAGAAGCGGTGTTAGTCAGCAGTCG  
AAAAAGAGTGGAACAGCGCACATAAGAGTCGGCAGTGCGACAATAGAATCAGCAAGGGCGCTAAAGTA  
CCTGGGTGTATGCTAGACACAAGAATGTCGTTCAAAGAGCACTTGGAGTACGTGCACAAGAAAGCAGCA  
GAGTCCTGTGAGCGCTATCCAGGATTATGCTGAACACACGGGGACCGAAACAGCAGAGACGCCGTCTCC  
TTATGACCGTAAACCGAGCGGTAATAATGTACGCGTCCCCCATCTGGAGCAGAGCTATGGCTGTTCCAG  
CTACAGCCGGGGCGTACACTCTATATATCGCCTAAGCGCTCTACGGGTGAGCTGCGCATTCCGGACGGTAT  
CGGACGAAGCGGCGCTGGTTATCGCAGGAATGGTCCCGCTAAGCGAACTGGCAACAGAAGCTGTAGTTTG  
CTATAGAGCCACGATGGAAGCAACACAGCAAACCTCGATTCGCACNGCGGCAAGGATGCAGAGCGTGGC  
ACGATGGCAAGCACGCTGGGATCGCGCATCTAAAAGGACGCTGGACGCATAGGCTTATCCCAAACCTTGGA  
AGCCTGGACAAACCGCAAGTATGGCAATACTAATTTTTTACTTAACGCAGCTCCTATCNGGCCACGGATGC  
TTCAGGAGCTACTTGAAGCGATTTCGGCCACGACAACACAGACGAGTGTTCTTGGTGCGGCAGNNGGAATCG  
CAGAGGACGCCAACCACGTCAATNTTCGAGTGTGGANGNTTCNCAGCGAACAGACAGGAAGTGGAGGACA  
NCNTGGGCAGACCTATCACGGTGGACAACCTGGTACGAGCATGNTGGAGACCGCACAAAAGTGGGACG  
CTGCCNGCACCTTCGCAGCAGAAGTGATGCGGGAACTCAGGAGAGTTGAGCGCAGCAGACGGAGAGCGG  
CGGANGTTTAGGTAGCAAGAACATGCCTGTGAAGCAATGCTTCGCGGCCGTTCCGCAGGCAATCCACGCT  
ACCTAANCATCACGTACCCCTCCTCTTCTATGTAATCTTGCTTCCCAAACAAAAATTGAAACATGCCGCTT  
ACCTTCGTTGATATATCAGCTGTTTATGTTTACGGTACTTTACCATTTTTTCAAACATCGATAGAAATCTCGA

TAAATCATCGTAAAAAACTCAATATGTTCCGCGCGAATTTACACATTTCTCAAAAATGTGCCTTTTTGAAT  
GATGTGTGAAATGTGTTTTCTTATCTGGAAACGCACAGGGCGCATTGTAGGGACCAACTGGCACAAAAA  
TTTATCATTTTCATCCCATTAACACCAGCACCCGTTACAGTCAGAAAAGTCACCGAAATATTATGCATGCAT  
CCCATCGTAGTCGCTATTTGCTTTTCGCACGACGCTGCATGATTTTCGCTATCTCAGCGTCGGTGCGTTTTCTTC  
ACTCGCACTTTTCGTGAGAATGAAGGAATGCTCGATAGATCAGGCCACATCACCGTTATAATTTAGATGTG  
GTGAATAATAATTGTGTTTTGTATTTGTGTTTTGCTGAAATTGAAGAAAAGTAGAAGGTCCGATTGCCACGC  
TTCGTTCTTTTTTAATTTCGACAGCGGAACAAGCAAGTCGCATATTTTGAGCGCGCATAAATCATAGTAATTA  
ACGGTGCAGTGGCTGTACACCGCTTCGGATTTTTTAAGGGCATATCGAGCCCAACTCTTTTTAAAAGTCCCC  
AGTGCTCATAACAGTTCGCGTTCAGCAGATGTTATTCGCTTTTTAATTAATCAAGCGCGTAATTCTGAATTAA  
CCCCTTTTTTAGTGGATAAAAATCTTACTTAGCTACCGGCCAGCCATTGCGCAACGACGCGTTCGTGTATTC  
ATATATATATACACATATAAATTCAGCGTGGCTGGTCGGTCGTAGCCAATTTGTGAGTTGCAACGGCTCTA  
AGGGAGTGGAAAATATCAAAAGGGCCACGGATTTCTTAAGGATCACTACAGATTAACTGCGGCGCCAC  
CGGCACATAGCGGCTGAGTCTATACCCCGCGACCGCGTGTTAGCCATTGATAACCAAGCTTTGCTGATCT  
ACTTCTACTTTGCCGCCCCCTTTTTGATCAACGGAGTGTCTCCAACAAGGTATAGGACCGCTTAAGTGTCCG  
CAGATCGAGATCGAATATACGTGCTGGGCGATTGGTTGGAATTTTTGCGTACACGCTTCGATCTAAATGNT  
CATGCCATTTAGCCATTGATAACCAAGCTTTGCTGATCTACTTCTACTTTGCCGTCCCTTTTTGATCAACGG  
AGTGTCTTCAACAAGGAATCGGACCGCTTAAGTGTGCGCAGATCGAGATCGAATATATGTGCTGGGCGAT  
TGGTTGGAATTTTTGCGTACACGCTTCGCAGCAGAAGTGATGCTGGAACCTCAGGAGAGTTGAGTGCAATA  
GATGGAGAGCGGAGGAAGTTTAGGTGGCAACAACATGCCTATGAAGCAATGCTTTGCGGCCGTTCCGCAG  
GCAATCCACGCCACCTAATCATCACGTACTATCTACATCCTAAGCATAAATTATTTATTTATATATTTA  
TGTGCAAATAAACAGAATACAAAAAACACACACACACAATGGAAACATAACACCCCTTCCACCCCTC  
CCCCACCGCCCCCTTAATCCTTAACACCCCCGCCACCCCTTTACCTTGCTTAACAACACTTGACCCTGATAAT  
AAATGTAAACAAACATACTGTGCCAGAACATACAGTCCCCACCACGGTGACATCACTTCCTGTGCCAGAA  
CATACAGTTCCTATCTACTATCCTATGTAGACATAAGAATATAATAAAAACGTGTTTCATCGACTTGGGAA  
ATTCCAATTACTGCCCCGATCAGTTTCGAAATCATTTTCAAGAAAAGGCCAGGTTGTGTTTTTTTTTTGT  
ACATACAAACATAGCCATGATAATTGTATAAGGCCATTAGAATCGAATAAATTCACAGCATTAAATTTGTA  
GGATTACTCAACTGAATAAGTTTCTNTGCTTCGAAATTTTTTTAACAAAAAAGTGACATTTTTTGACCCAAT  
AAAATGTATATATTCCTTATCCGCATGGACATAGGAGTCCGTATTGTATTAATATTTTAAGCGTACGCAGT  
ACTATGTTCAAGTTTATATTATATCTATTCTAAAACTCTACAAGATTAAAATATATTCATAGATATCGAT  
ATTGATAAAAAATTTTTTTTATACCCTGAACCCATTAAAAATGGGTATAAGGGTATATTGTATTTGTGCAA  
AATCCAAATGTATGTAAACAGGCAGAAGGAAGCATCTCTGACCCCATAAAGTATATATATTCTTGATCAGC  
ACCAATAGCCGAGTCGATCTAGCCATGTCCGTCTGTCTGTCCGTCCGTCCGTCCGNATGTATGAACGCAAG  
GATCTCAGAACCTATAAGATCTAGAGACGAAATTAGATGTAGGTGCTCCTAGTTCCCGCGCAGATCGAGT  
TTGTTTCCGATAATCGATAACTTACTCCGTTTCCAAGCAATCGATAAAAATCGATATCGGCATCCTGTTTTT  
TTTAGCAAATTGGGTAAATAATAAGAGCTAGAGCCACCAA

>160\_rnd-1\_family-44\_Unknown  
GTAAAAGGAGAGTCAGTAGAAGTTGTTTCTGCTAAAATTCTAACTTACAACAAAAGAGCAAAACGGCCA  
ATCAATATACCGAAAAGGTAGAAAAATTGAAGGAGCCTATATCAGTGCAGGTCTAAGCCAATCACTTGCA  
AAACAAATGCAGAACNAAAACAGCTGTAAAAGCTATGACCCAAAATTGTTCGATTGATAAGGTAAACTT  
ATCATACATGTCAGGCACATTCACAAATATGAATGATGCCGTCTCCAAATTTGTCAATGGTTGCACGGAG  
GTAACAGGTCAAAATAACATCGTCCTGTATTATCGATGAGGTGCAATCACAATAATACAGGAGGCCGAG  
GTTATAATCGTGGCAGAAATTACAACCACAACAATTACAACCGAGGCGGTAATAAAAACAACAACAATA  
ATTACAATAACCGTGGAGAAAGACGAGGCCAAAATCGAGGAAGAGGCCAACCAAGGTAACAATAATAAC  
AATGTGAGAGTGGCGCAAAGTGCCTCGGAAAACCTCTCAGAACCCCTTTAGGAAACAATCAGTAAATGCAA  
AGGTTTCATTCCATCAATTACAGTCTTAATACATTTGTCACTTTTTATAATCATTCAACTGAAAATAAACTCA  
CATTCCTAAAAGATAATGATGCAGATATCTCACTTTTAAAAATAAATTCAGATAATTTCAAATTCAGGA  
GACAAAATTATAGACACCCAAGGCATCGGCCAGGGTGTAATAAAATCGCAAGGAACAACCTTCAACAGAA  
CTTCAATCAACAAAATATAATATTCCACACGAATTTCAATTCGTAGACTCAGATTTTTCAATACCGTGTGA  
TGAATAATAGGCATTGATTTTATTAAAAAATTCAATTGTCAATTAGATTTCAAACCAAGTGAAGACTGGT  
TTATAATTAGACCTCAAACTTAAGTTATCCTATTTATGTTCCAATAACATATAGTGCTGACAACAATGCA  
TTTCTTCTGCCAGCCAGATCCCAAGTAATTCGAAAAATAGACATAAATTCAGTAAACGATTATATATTTGT  
TCCAAATCAAGAAATACCTANTTGAATTTATGTTGCAAATACAATAGCAGCATCCAAACATGTATACATTC  
GCCTTCTAAACACAACCTAATTCGACCAATTGGTCAAAGTAAACAAAATCGAATATGAAAATTTAACAGA  
TTACGATATTCATAACACTAATCCAGAAAATAGAAGCGTACAAGTACTTTCAAAGTTAAAGAAAAATTGT

CCATAACAATTCAGAAATTAATTAACAGAATTATGCACCAAGTATAGTGATGTGTTTCGGACTGGAAACCG  
AACCAATAGCGACAAATAATTTTTATAAACAAACATTAAGACTTATAGATGANGAACCCATTTATATAAA  
AACTACAGAAGCCCGCATAGCCAANTTGATCCAATTGTGAAATCCAAAAACAAGTAGGGAAATTAATA  
AACGACAAAATCGTNGAACCGTCTGTATCCGAGTATAACAGCCCCTCTTGCTAGTTCCGAAAATATCATT  
ACCAAATTCGGAAGAAAAGAAATGGCGATTAGTAATTGACTATCGCCAAATCAACAAAAAATTACTTTCT  
GACAAATTAACTCTCCCCAGAATTGATGATATTCTAGACCAACTGGGCAGAGCTAAATACTTTTCATGCCT  
TGACTTAATGTCAGGCTTCCACCAAAATTGAACTTGAAGAAAATTCAAGAAATATAACATATTTTTTCAACGA  
GCAATGGCTCATATCGCTTCACGCGATTACCATTTGGTCTTAAAATAGCACCGAATGCATTTTCAGAGAATG  
ATGACTATAGCATTCTCGGGTTTAGAACCCTCTCAGGCATTCCTTTATATGGATGACTTAATGGTGATAGG  
ATGTTCCGAAAAACACATGATTAAAAACTTAACTGATGTTTTAAATGTATGTAGGAAATATAACCTAAAG  
TTGCATCCAGAAAAATGTTAATTTTTTACGCGATGAAGTGACATTCTTAGGTCACAAATGCACTGACAAAG  
GAGTATTGCCAGATGACAAGAAATTTCGACGTCATCAAAAATTATCCTATCCCCCATGATGCGGACAGCGC  
GAGACGATTTGTAGCATTCTGCAATAATTATCGTCGATTTATAAAAAAATTTCGCCGATTATTCACGGCACA  
TAACTAGATTATGTAAAAAGAATGTTCCTTTTGAATGGACGGNCGAGTGCCAAAACGCATTCCAATACCT  
CAAAGAAAAGCTTATGCACCCACATTATTACAATATNCTGATCTTCGCAAAGAATTTTGCATTATAACAG  
ATGCTAGTAAACAAGCTTTCGCGAGCGGTTCTAACTCAGAACCGTGACGGAATTCAATTCCCATGCAGCTT  
ATGCATCTCGTTCATTTACAAAAGTGGGAAAGCAATAAGAGCACAACAGAACAAGAGTTGGCGGCAATTC  
ATTGGGAAATTACCCATTTTAGATCATATATTTATGACAAACACTTTACTATTTAAACGGATCACAGACCA  
TTGACATATCTTTTTTCTATGACTAATCCCAGCTCGAAATTAAGTGCATGCGGCTAGAGCTTGAAGAAAA  
CCACTTCACAGTAGAATACCTAAAGGGAAAAGATAATTTTCGTAGCAGACGCACTTTTCGCGTATTAATATA  
AAAGAGCTCAAGGATATGCAACATAAAGTCCTGAAAGTCACTACCAGGCGACAAATTAGACAAAAAAA  
CTGTACAGTAGAAAAATTATGAACTTCTGCCAAGGCCAAAGTCATAAAAAATGTATCTAAGCCCAACGTACAT  
GAAGTCATTACAAACGATGAAGTACGAAAAAAAGTGACCTTGCGCATAACAGAATCTAAATGTTTATTTA  
AACATGGAAATAAAATTATCGCAAGAATTGAAGTTAGCGATTTAAATACTAATGGAATCCTCGACTTAGT  
TCAGTTCTTCCAAAGGCTTGAAACAGAAGCCGGTATATTAAAAAATCAGCCAACTCAAAGTGGCACCGAGT  
GAAAAGGTCTTTGAATCAGTTTCAATAGATTATTTTAAAAAATTTGAGCAATATAATATTTAAATCTTTAAG  
AGTAGCGCCACTCCAGCCGGTGACCCAAATAAACGATGAAAAAGAGATACAACAAATACTGTCTACATA  
CCATGACGACCCAATTCAAGGAGGCCACAGTGGCATAACAAGAACGCTAGCAAAAATAAAAAAGACACTA  
CTACTGGAAAAATATGACGGGTCATATAAAAGACGTACGTACGTGCAGATGCCAAATGTCTAAAATAAAG  
ACACACACAACAAGTAAGAGGTTCTAGTCGGGAGCTCCCGACTAGGGGATACCCTGAACCTCTTCTTCC  
AACATCAAATGCATATATATATTCTATTTTAGAAGCTATATGTCAAGTTTGGTGACTCTAGCTCTTATTATT  
TACCAAAATTGCCCAAAAAACAGGATATCGATATCGATTTTTATCGATTGCTTGGAACGGAGTAAGTTA  
TCGATTATCGGAAACAAACTCGATCTGCGCGGGAAGTACAGCANCTACATCTAAAATTTCAAGTCTCTA  
GCTCTTATAGGTTCTGAGATCCTTGCGTTCATACATACGGACGGACGGACGGACGGACGGGGACAGACAG  
ACGGACATGGCTAGATCGACTCGGCTATTGATGCTGATCAAGAATATATATACTTTATGGGGTCGGAGAT  
GCTTCCTTCTGCCTGTTACATACATTTGGATTTCGCACAAATACAATATACCCTTATACCCATTTTTAATGG  
GTTTCAGGGTATAAAAAAGACATAATTTAATAAAGAGTTAATAGAATATATATTTAATGGAATGGAATGAAA  
TTGTTTCTATATTAAGCAAACGTTCTGAGCTTGATAGATCATTTAAGTGCCTCAATAAAAGTGCCTAATA  
TCAAACCAAACAAAAATAAAACATGTTCAAGTTCTGGTAGAATCATACAACAGAGTNCGTGACATTGTAA  
ACAACAATGGACGTAGGTTAAGCGATTTATATTTAACACAATCAATTGACGTGTTAAAAAGGCTACGTGA  
AAATATTAGACATATTTTCGGAAAGACATAATTTTCAAATATTGTTCCGCATGCGCTAAATACACCAGCAAC  
ATTCGAAATCACTGATTTAATGATATCAGTAGAAGAAGAACTTCGAACAAAAGCAAGAACAATCGAAA  
TAGTCGACATGGCTCAAACACCAGTAGATTTTCTTAAGTTAGCCTCATCGCTCTTACCAGAGNTTGATGGC  
AAGGCAGAAAATTTAAAAAGCTTCATAGATGCTCTGAATCTGGTAGATTCTCTAAAAGAAACACACGAAG  
CACTTGCTGTAAGTCTTTATTAAGACAAAACCTAAAGAGCCATGCCAGGAACCTGATAAGTGATGAGAACA  
CTATTGCAGCTCTCATATCGAAACTATCGGACAAAAGTAAAAGGAGAGTCAGTAGAAGTTATTTCTGCTAA  
ACTTCTAAACTNACAACAAAAGAGCAAAACGGCCAATCAATATACCCAAAAGGTAGAAAAATTGAAGGA  
GCCTATATCAGTGAAGGTCTAAGCCAATCACTTGCAAAACAAATACAGCACTACAACAGCTGTAAAGGCT  
ATGACCCAAAATTGTTTCGATCGATAAGGTAAAACCTTATCATACAGGCAGGCACATTCACAAATATGAATG  
ATGCCGTCTCCAAATTTGTCAATAGTTGCACGGAGGTAACAGGTCAAAGTCAGCACCGCTCTATACCNC  
GACGAGGTAAAGACGTGTTACAGCAAAATAATAGANGAGGCCGAGGTTATAATCGTGGCAGAAATTACGA  
CCACAACAATTACAACCGAGGCGGTAATAACAACAACAACAATAATTACAATAACCGTGGAGGAAG  
ACGAGGCCAAAATCGGGGAAGAGGCCGCGGGAACCNNAACCAAGGTAAACAATTATAACAATGTGAGAGT  
GGCGCAAAACGCGTCGGAAAACCTCTCAGAACCCTTTAGGAAACAATCAGTAAATGCAAAGGTTTCATTGCA

TCAATTACAGTCTTAATATATTTGTCACCTCTTTATAATCATTCAACTGAAAATAAACACACATTCCTAATA  
GATACTGGTGCAGATATCTCACTTTTAAAAATAAATTCAGATAATTTCAAAATTCAAGAAGACAAAATTA  
TAAACATCCAAGGCATCGGCCAGGGTGTAAATAAAATCGCAAGGAACAACTTCAACAGAACTTCAACCAA  
CAAAATATATTANTCCACACGAATTTTCAATTTAGTAGACTCCGATTTTTTCAATACCGTGTGATGGAATAATA  
GGCATTGATTTTATTAAAAAATTCAATTGCCAATTAGATTTCAAACCAAGTGAAGACTGGTTTATAATTAG  
ACCTCAAAACTTAAATTATCCTATTTATGTTCCAATACGTAATTGGCAACAATGCATTTCTTCTGCCAGCC  
AGATCCCAANTAATTCGAAAAATAGACATTAATTCAGTAAACGATTATATATTTGTTCCAAATCAAGAAA  
TACATAATGGAATTTATGTTGCAAATACAATAGCAGCATCCAAACATGTATACATTTCGCCTTCTAAGCACA  
ACTAATTTTCGACCAATTGGTCAAAGTTAACAAAAATCGAATACGAAAATTTAACGGATTACGATATTCATA  
ACACTAATCCAGAAAAATAGAAGCTAACAAGTACTTTCGAAGTTAAAGAAAAATTTTCCAGAACAATTCAG  
AAATCAATTAACAGAATTATGCACCAAGTATAGTGATGTGTTCCGACTGGGAACCGAACCAATAGCGACA  
GATAATTTTTATAAGCAAACATTAAACTTAAAGATGATGAACCCGTTTATATNAAAACTACAGAAGCC  
CGCATAGTCAAGTTGAGGAAATCCAAAAACAAGTAGGGAAATTAATAAACGACAAAATTCGTAGAACCAT  
CTGTATCCGAGTATAACAGCCCCTCTTGCTAGTTCCGAAAAAATCATTACCGCATTTCGGAGGAAAAGAA  
ATGGCGATTAGTAATCGACTATCGCCAAATCAACAAAAAATTACTTTCTGACAAATTCCCNCTCCCCAGA  
ATTGATGATATTCTAGACCAACGGGGCAGAGCTAAATACTTTTCATGCCTTGACTTAATGTCAGGTTTCCA  
CCAAATTGAACTTGAAGAAAATTCAAGAAATATAACATCTTTTTTCAACGAGCAATGCCTCATATCGCTTCA  
CGCGATTACCATTTGGTCTTAAATAGCACCAAATTCATTTTCAGAGAATGATGACNATAGCGTTCTCGGGT  
TTAGAACCCTCTCAGGCATTCCTTTATGTGGACGATTTAATGGTGATCGTGATTAGAAACNCAACTGATGT  
TTTTAATGTATGTAGANAATATAACCTAANGTTGCATCCAGAAAAATGTTTATTTTCATGCACGAAGTGA  
CATTTTTAGGTCACAAATGCACTGACAAAGGAGTATTGCCAGATGACAAGAAATTTGATGTCATCAAAAA  
TTATCCTGTCCCTCATGATGCGGACAGCGCGAGACGNTTGTAGCATTCTGCAATTATTATCGTCGATTTA  
TAAGAACTTCGCCGATTATTCACGGCACATAACTAGATTATGTAAAAAGAATGTTCTTTTGAATGGTCA  
AGTGAATGCCAAAACGCATTCCAATACCTTAAAGAAAAGCTTATGCATCCCACATTATTACAATATCCTG  
ATATTCGCAAAGAATTTTGCATTATAACAGGTGCTAGTAAACAAGCCTGCGGAGCGGTTCTAACTCAGAA  
CCGTGACGGAATTCAGCTCCCAATAGCTTATGCATCTCGTTCGTTTACAAAAGGGGAAAGCAATAAGAGC  
ACAACAGAACAAAGAGTTAGCGGCAATTCATTGGGCAATTACCCATTTTAGACCATATATTTATGGCAAGC  
ACTTTACTATTAACAGAACACAGACCATTGACGTATCTTTTTTCTATGACTAATCCCAGCTCGAAATTA  
ACTCGCATGCGGCTAGAGCTTGAAGAATACGACTTCACAGTAGAATACCTAAAGGGGAAAGATTATTTG  
TAGCAGATGCACTTTCGCGTATTAATATAAAAGAACTCAAAGATATGCAACATAAAGTCCTGAATGTCAC  
TACCAGGCGACAAAGTAAACAAAATAAAAACTGTATAGTAGAAAATTATGAACTTCTGCCAAGGCAAAG  
TCATAAAAAATGTATCCAAGCCCAACGTACATGAAGTCATCACAATGATGAAGTACGAAAAGTAGTGACC  
TTGCGCATAACAGAATCTAAATGTTTATTTAAACATGGAAATAAAATTATCGCAAGAATTAAGTTAGCG  
ATTTATATACCAATGGAATTCTCGACCTAGGCTAGTTCTTCCAAAGGCTCGAAAAAGAGACCGGTATATTA  
AAAATCAGCCAACTCAAAGTGCCGCCGAGCGAAAAGATCTTTGAATCAGTTTCAATAGATTGTTTTAAAA  
ATATGGGCAATGAAATATTCAAATCTTTAAGAGTAGCGCTACTCCAGCTGGTGACCCAAATAACAGATGA  
TAAAGAGATACAACAAATATTGTCTACATACCATGACGACCCCTATTACGACCTCAAGGAGGTCATAGC  
GGAATAAGAAGAACGCTAGCGAAAATAAAAAGACACTACTACTGGTAAAATATGACACGTCATATAAAA  
GAGTACGTACGTAGATGTCAAAAATGACAAA

>9\_rnd-5\_family-13\_\_DNA\_\_Crypton-V  
AATGCATGTCATATGAAAAATTTTAAATACGGTAAATTCATATGACTGTGGAGTGTTGCCTTGCCGGCATA  
TGTTTATAAAAAGAATAATGAAGTTATAAAAGTGTGTTATTAAATTAGTACATGAAGACATTAAGGTGAA  
TGGTAGCATTTGGAAAATATATCGCCATTATAGATGATGTGTCAAAAAAACCTATATAGGGAGTGGTGTC  
GCGCAAGGCATGTCATATGAAAAATTTTTAAATACGGTAAATTCATTATGACTGTGGAGTGTTGCCTTGCC  
GGCATAAGTCAATTATGTTTATACAAAAAGAATAATGAAGTTATAAAAGTGTATTATTAAATTGGTACAT  
GAAGACATTAAGGTGAATGGTAGGTGAAAATAATGGTGAAATGGTGAAAATAAGAATCTAATAAAAAAT  
GNGGCTTAATTTTTTTTTTCCAATTAAACAGTTATTTCTCATAACAGTCATTCTTTTTTGACCGCTTTCGTG  
AGCACTATCCAACTATTTTATTAAGTTAGAGTCGTTAGTTTCAAGTTGCTTACAATTAATCGGGCATATG  
TCGGGAATTTAGCTAAACAATTATTTTATATTTATAAGCATTTTTTATTAACCTTAGTTTATGCATCAAGTATA  
AAATTTATTTTCTTCTCGTAATGTGATGTAGTGCAACACTTTGATTTACATATAAGTGAGATATCGATAAT  
AGCATGAAAATAAGAATCTAATAAAAAAATGCGGCTTNATTTTTTTTTCCAATAAAAAACAGTTATTTCTCTCA  
TAACAGTTATTTCTATTTGACCGCTTTCATTTTTTACAATCCATCATCAATTTAATATCTCTCTCACATCTTCAT  
TTTAATTGCATAAATATCGACTAGTTTTTACCATAACGCGAGCAAAATGAACGCGTTTCGAGTATTCAATT  
TGATAGTGCAGAGCTGCCTTAAAGTACATTTGAAGAAATGACTTGACTTGCTCGTCGCGTAACCTCGAAA



ACTTGGCGCCATTAAATTTCTGGAACCTTTGCGAGAGGATGTATTTCTTAATTAAGTGCGAGCAATATTAT  
GTATTGCATAAAAAAAAAAATTAAATAGTGGAAGGAAGTAAATGTGCATTGCAAAATTTAGCAAAGGCA  
GTTTCGAAGCGGAGATTATTGATTCAAGCGAGGTAAGTTGAGCTTGACATTTCAATAATTATATTTGTCTG  
TATATGTACTTTTATTTTCATTAGAAAGATCGTGAAATACTGGACCAGCAATGTCAAGAACTTAATAAGGGTA  
TGTACATAAATCAATAACAGTTTTTGTCATTTTTCGCATATGCATATTTATACAATAGTCTATATACATATGTA  
CATAGGCAATGCAATAATCGTTTTTTTAATTTAAATTAATAATACATTAAATATTTATAGACTTAC  
TAGAAGCAGNCACTAAGTTAAATGAAAGTGAAGCAACAACGAACGATGATAAATCCGGTAAGTACAATA  
CTAATGTGCCTTTGAAATAAATTAATGAGCATTGTCTTTTAAAAGAGGAGCCATTAGCAGCTTATAAGTCA  
AATACTGACACAACAAATAAAAAGCAACCTGGGACAATTTGAAGCTTTCGGTATGTGTGCAATTATTA  
CTAAGCCAGGACTAAATAAAAAATCATTTCGATTACACTTCTGACAGAGTTATGTTTTGTAATGTATTTAT  
TATTATATGTTAAGTCTTAAATATGCATAATTGTGAGTACCACAGTTTTTAAGGCCAGAGTCGGAAAAATATC  
AAAAGATTTATAGCCTTATTAGTTGTTGAAAACAATTTAATTATCATTGTATTATGAGTTAATCACATAT  
GCAAAATCAGATCAATTTATTATAAAAAAGCTACACAAAAGACACAATCGGTCATTACTTTTCTAGGAATA  
GTGTATTCTCTTGTACGCTATATGCCTCCGGACGTACAAACCTTTTTTAGTATTCAAACAGTTTTTGCTAAT  
TTGTATTTTAACTAAAGCTAACATTGTATACTGATAATACTCGCCTTTTGATTGTTACCTAATTTGTGCTA  
GTACCAGCTATTTTGTGTTTCGTTTCAGGTGTCTTGTGCCCGTCTTATATTAACATGTAAAATAAATAAATGT  
ATTAATAAAATACTTATACCTTAACATAATAGACAAAGACTGGCCTCTAAATGGCTAGATTCCCCAGCAT  
AAGCATTTTATACATTTAAATCGCTTGGTAATTTTCCACATTCTATTCAAGGAGTCGATTCCAACCTATACTC  
CGGATATAACTAATCAGTCCAGCACTTATATACTTCCAAGTTTAACTTACACAATGTAACCTCCACTAAGTG  
ATATAAGGGATTTGATTATTCCTAATTGTGAAAACCTTTTTTGTCTGTTTTGTAATAAATTGCAATCAAAAT  
TCGTTTCGTCACCTTGCAATAATAAGCCACAAGTAAAAAGTGTTTATGCCTGTCGAAAAATGACAAAACCT  
CGAAGAGTAGTTATTAATGAGATTTGGAGTAATGGCGATTAAATCGACAATATCGATGCATCGTTAAATA  
ACGAAATTTTAAAGCGAATTAACCTCTAAAAACGAATATGTTGTCATATGTTGCAAGGGATGTTCTGGATTT  
TTCCCCAAAAGTACGATACGCAGTCATATAAATAATTGCATAGGCGGCGATCATAAGAAAGGAACCTCTG  
ACTTGCTTAAGCAAGGTCGCTCTAAAACCGGCTCTATGCATAAAAGTGCAAGTGACGTTCTCTTGTAAGCT  
ATATGCCTCCTGACGTATTTAAACCGTTTTTGTTAATTTTTTTTATTTATTTACTAAGGCTATTTTTATATACT  
TGATATTACTCAAATTTTATTTTGTAACTGATTTCGTGTTTCATTCCAGCTAGTTTGTGTTTCGTTTCAACTGTC  
TTGTGCTCGTCTTATATTTATATGTTTCTAACAAAGGTAATGAAAAGTATAAATACATTTTTTTTTATATATA  
TAAATAAAATCCTTATCATGATCAGTACAGATATACATTTTTTTTAAACAACATTCATGCTGCTTAACGTTAT  
ATAAAAATGATTGTATTAAATATAAGATGCAATAGAGACACATCCGAATGATCATAGCAAATGCCAATT  
AACTGCAACTGAAGTGGAGGTATACACTATGCCATATCCTTAAAGGTCTGAAAGTTAAGCAAAAATAAATG  
TTCTTAAATNTGTATATGGCACTGCTCCTAGTGCTACTATATTGAATACAAAATATTTACTTAAATATTG  
AATTACGTCCATTAATAATTAATAATAGATTTCCTTTTTATCTATTAATTATTAATAATATTCAAANAGATGC  
ATCCGAACAATTTATAAACACAACCTCAAAATGCATCGGCTAATAGTGGATCTTTAGGACTTAACGACTTTG  
GCTCTAATTGTTTAGATTCATCGGCAAAAATCAAAATCATTCCACGATAAACGATTCATTTCAATCGCTTA  
ATACTAATTGTCCAGATTCCACTCAAGGATTCGATTCCAGCTATGCTCCGGATATAACTAACCGGTCCAGC  
ATTTTANATAATTCCAACATTAACAAGTTTTTCTTACACAACCTGNAACCTCACTAAGTGATGTAAGGGAT  
TTGATTATTCCAACCTGCGAAAACCCAAACAAATTTGTAAGAACTTTTTGCTTGTGTTTGAATAAATTGCAA  
NCAAAATTCGCTCGTCACTTGCAAGATTGTTTATAANAATAAGCCGCAAGTACAAAAGTGTTTGTGCCTGTC  
GAAAAATGACAAAACCTCGAAGAGTAGTTATTGATGAGATTTGGAGTAATGGCGATTAAATCGACAATATC  
GATGCATCGTTAAATAACGGAACCTCTNAAGCGAGCCCGTCAAACCTCTAAAAACGAATATGTTGATTTCAT  
ATGTTGCAAGGGATGTTCCGGATTTTTTCCCCAAAAGCACAAATACGCAGTCATATAAATAAATTGCATAGGC  
GGCGATCATAAGAAAGGAACCTCTGACTTGCTTAAGCAAGGTCGCTCTAAAACCGGCTCTATGCATAAAA  
GTGCAAGTGACGTTCTCTTGTAAGCTATATGCCTCCTGACGTATTTAAACCGTTTTTGTTAATTTTTTTATTT  
ATTTACTAAGGCTATTTTTATATACTTGATATTACTCAAATTTTATTTTGTAACTGATTCGTGTTTCATTCCA  
GCTAGTTTGTGTTTCGTTTCAACTGTCTTGTGCTCGTCTTATATTTATATGTTTCTAACAAAGGTAATGAAAA  
GTATAAATACATTTTTTTTTATATATATAAATAAAAATCCTTATCATGATCAGTACAGATATACATTTTTTAAAC  
AACATTTCATGCTGCTTAACGTTATATAAAAATGATTGTATTAAATATAAGATGCAATAGAGACACATCC  
GAATGATCATAGCAAATGCCAATTAAGTGAAGTGGAGGTATACACTATGCCATATCCTTAAAGG  
TCTGAAAGTTAAGCAAAAATAAATGTTCTTAAATATGTATATGGCACTGCTCCTAGTGCTACTATATTGAAT  
ACAAAATATTTACTTAAATATTGAATTACGTCCATTAATAATTAAATAGATTCCCTTTTTATCTATTATTA  
AATATATTCAAATAGATGCATCCGAACAATTTATAAACACAACCTCAAAATGCATCGGCTAATAGTGGATC  
TTAGGACTTAACGACTTTGGCTCTAATTGTTTAGATTTCATCGGCAAAAATCAAAATCATTCCACGATAAA  
CGATTCATTTCAATCGCTTAATACTAATTGTCCAGATTCCACGCAAGGATTCGATTCCAGTTATGCTCCGG

ATATAACTAACC GGTCAGCATTTTAAATAATTCCAACATTAACAAGTTTTTTCTTACACAACTGAAACT  
CCACTAAGTGATGTAAGGGATTTAATTATTCCAACCTGCGAAAACCCAAACAAATTGTAAGAAACATTTTG  
CTTATTTTGCAATAAATTGCAAACAAAATTTGCTCGTCACTTGCAGATTGTTTCATAAAAAATGAGCCGCAAG  
TACAAAAATTTTTGTTCTGTGCGAAAAATGACAAAACTCGCAGATTACTTATTGATGAGATTAGGAAAAA  
TGGTGATTATATCCATNATATCGATGCATCGTTAAATAACGGAACCTAATCGTGCCTCGTCAAAAAGCGTG  
TAAACTCTAAAAACGAAGCGGTTGATTTTCATATGTTGCAAGGGATGTTCCGGATTTTTTCCCCAAAAGCACA  
ATACGGAGTCATATTAATAATTGCAAAGGGAGCGATCATAAGAAAGGAACTCGTGACTTGCTTAAACAAG  
GTCGCTCCAAAACCGGCTTCATCCATAAAAAGTGCAAATGACGTTGTGCGCACAAAAATAATGCCTGTTTT  
AAATGATGATCCCATTCTAGAAATCTTATATATGATGAATTGATTGTTTTATTTCGCAAACGCAGAATCTA  
TGAAGCACGGCGAACTTCAGTACGATATGATCAGAGCAAACATGAGATTGCTCAGCAGACTATTACATGA  
AATAAAAAAATCAGAATCTAATGAGATACAGGAACTTAAAGACGCCATTAATCCCAAACATTTGGATTTG  
ATGATATCTTGTATCAGAAAAGTGGCTCAGTGGGACTCTTCTTCGTTGTTTTTTAAAACACCTTCAGTTGCA  
ACGAACCTTACAACCTAATTA AAAAGNGCGCAAAAATATTGTGGACTCATTGCATTAAAACACAAAATCA  
TGCAAAAAAATTAATTAAGATTTTTCTTGTCTATGGGAAACCGAAATTCCTCTTTTTTATAACAAAAAAA  
GCTATAGAGGACCAGTCAAAGAAAAAAGAGCCCTACCAACTATTTTACCATGTAAAGAAGACATCAAAA  
ACTGTTTGATTATGTGATAAAAAACGGAAAGCGCTCTGAGTGTGCTAAAAATTAAGTTTGATTTTTTATGG  
ACACCGTTGATACAAAGCACACTAATTGGCCTTCAAATTTTTTAACCGCCGTAGAGCCGGTGAATTTGAAA  
GACTAACAATTGAGAACTATCTAACAGGGCACGCCATNGATGAAAATGTAGATAANNAAACTTCGAAC  
GTCTCACGAAAGAACTAGAGAAATCGCTCAAAAATACACAAGATTGACTATTCGTGGAAAACCTCAATCG  
AACTGTGCCAGTGCTGCTCACACCGTTTGACAAGTATTGTATAGAACTATTCTCAAACATCGTAAAAGA  
GCTGGTGTAAAAAATAATGATTACATATTTAGCGTGCCTAACGCCAAGCCCTTAGCAAATCAATATGT  
AAGGGCTTGTCCGATTCTGAAAAAATTTGCCCAGGAATGTGGGGCTCGCTGCCCAGGGGCTTTACGGGGA  
ACGATGCTTCGAAAGCATTTAGCTACCTATACATCGATGCTTAACGTCAAAGATGTCCAAATTGATAGGCT  
TGCCAATTTTATGGGTCATCATAAAGATATACATAAAGAAATCTACAGAATCCCTGTAACAGTAGCGGAG  
ATAGCCGAAGTATCCCAGATGCTTATGGCAGCTCTTGGAATAATGTTGAGGATGAAAACACAGTAGCCC  
TTGATCAGTTCGAAGAAAGTAAGTACGTAGATTCATCAAGTTTGTGGGTGATACTAAGAGTAGTTATGGT  
GAAAANTGTAATATCTTAACTTAACTAATAATTACTTGTGCGGCTTATTGTGAATGTTTTTACATTGTACCT  
GAAATCCATTTTGCAGATGATCCTTTAGAGGATTCGGAATCAGATTATTCTGAACAGCGATCAGAAAGCG  
ACTTCAATATTTCCGATGATGANATTGTAGAAAATCGAATAAAAAGGGAAGCGCCCAAGTAGTAAGTATT  
AAATTGCAACCTACATATTTATGTCACGTGCTTACATGCATCGCGTTTAGGCTATCCTATTTATCCTCATTG  
ACAAAGTAAAAAGAGATATCGCGCTTGTGAAATGTCCGATCGTCTGTTCAAACGAACGCGATATTTTGCT  
GGCCCATTAAGTTATATCAACGAGAAGTAAAGTGCTAAAATTATATAATGACGACCACTGCGGCGTGGT  
AAATCGCAAAAATCGTCCTAAATAACAAACCTTATACAATCATAGAGATTGACTAACTTTTAGTTGAAGA  
CGAAGATGTTTAACTGGGTGCGTGGCGAATGTTTAAAATTAATATCACCTAATAAATTGTTTTGGTAGGCT  
GTATTAAGCTGTTATTGGTCTGTGATTGAGTATTGCGACGGTTGCAACCGACTGCGACGCTTCTAATTGAT  
TTTTATTTATTACTAAAACGTTAATCTTTTGCACACTAAATTATATTAACCTTTATTATTTAACAGGATCAT  
CATTTGGAAAAACCATAAGAAACCGTTGGTCTGAATGAAGAGCGTGAAGAAATATACCAGGCTTTTGGAG  
ACAACCTGTTGTCTCTTAAAGGATTGCCGTCGCTTAAGCAATGCAACGCAGTTATAAATAATTCTACATATC  
TAAAATGTAGGACACCGGCGCAAGTAAAAGCATGGATAGATAATCAGCGCAAAGCTAAATCAAGAAAAT  
CAACTCCGCAAATACATTAAATAATGAATATGTTGACCATATTTAGAACTAAATTGACTATACTTTTTCGT  
ATTTTTTATGTTAATATTAATTTATGCTAAGAATATTTNGAATTTGTTAAAAATGCATACTATAAATGTATT  
TAATAACGTCATTTATGTAAATT

>9\_rnd-5\_family-632\_\_LTR\_\_Gypsy

TGCAAGTTATCACCCAGCCCGCAAGGCAATTCTTATTGCAATCATAAACAACATTTTCAGTATAAGTCGCTA  
TCCCAATTACTTAGCCCTTTCAGACTTATTAGACCCGTTTCAATCACTACGTCCACTTAACGCACAGCTGC  
AGCTCTGCTAACATAAATATACAGATTCCCGGCTCTAACATAAACATAACAGCGCAACCACTTAACATAA  
AGATTCATATTCTCATGCGCAGTTCATAACGTAAACTAAAACCCAGTCTCTAGAGCGCAACCGCTTAACGT  
AAACATGACTCAAAGCGTCTAGCTTGCAGCAANCCACCCCGCGAGCTTTTAAAGACCCANTCTCTGGAAC  
GCAATTGCTAGCGTAAACACGGCTGATTTCGCAGCATAAGATCACCGCGAGCTTTTGAGCTTTAAGAGAA  
AAGCTTTATCATAACCATAGCTGACTTGCAGCATAAGTTCACAATTGTACTTTAGTTCTAATCTTGGATT  
AAATAAATCGGAAGCCTTCAGCCTCCCACTTAAAAATATATTTTTTTCCAATTAGTAGCCACTAATCGGTT  
AATTGGCGCCCAACGTGGGGCTCGCGATTATAAACACAAAAAAGGATAATTA AAAAGAAACAAAAATCCTT  
AGTGATTTCGCGAGTGAGCAAAAAGTGCCGATTTACCAGTCCAAGATTGTCTCAAAAAGAGCATCAAAATTTT  
CTAAGAACGAAAATATCGAGTGCCTCTAAAAGAAACATTA AAAAATTTCCGACGAACGGAAATACCCTGTT

TCTGAAAACCTTGAAGAGTAGTGAAAATACCCTGAGCTGGAAATATTGATTGTTTCACAAGACTTAAAAAGT  
GAAATCAAATTTCCCGTTCAAGTTAAATGAAAAACATTCCAAAAAATTAATCGATCAAAGAAGCGAAACG  
AATATTTTCGCCAACAAAATTTTTTCACCAATCAAAAACCTTTAACCAAATAAAAAATATCACGTCAACCTG  
AGACCCCATATAAAGAAGACCCTAAAACCCAGAAGGAAGGAAGGAAGGAAGACTTGAACGACATATGTA  
TAATCACCCATAAAGAAGACCTTTTACGTGAGCCATCATCATTTACTTTAAAAAAAANTTTTTTTTACTT  
AAGTAATGAGAGTTTAAATTTGTGTAAGCATTGTTAGTAATAATAAGTGTTGTTATAAGCTGGATAACCAT  
ATAGAAAGTTTAATTGAAGATTTTCAAAAATTTAAAAATGGCTAACATAATAACTTGACAGCTGATTTGGT  
AGCTCAGTTGATTGCGACTCAGACCAGAGCGCTTCAAGAGCAAATTGCAGAATTGAAGTTACAAATCACT  
CTCTCATCTAATAATGAACAAGAATATAAGATTACTGAAATAAATGACCTTATTCGTTGCGATGAATCTTT  
TTGATGTTATCAAGTCCATACCAGAATTCTCAGGCAGCTATAATGCATATGTTAGTTGGCGCGAAGCCGCT  
TGCTGTGCCATGCGAATGTATAAAGAAGGGAAGTAGAAAGTACGTAGGTGCTTTAACAAATATTAAGAAAT  
AAAATAACAGGTAAAGCTAATGACACCTTGACTAATCACGGTACCGTTCTTAATTTTGAAGCTATACTTGC  
AAGGTTGGATTTTCGCTACAGTGATAGACGACCAATCTATATAATAGAACAGGAGTTAAGTATTTTACAG  
GGTAACTTATCCGTTCTCGGAATACTACAATTTAGTTAATAAAAACTAACCCTTTTGATAAACAACAACTAT  
TATGACGTATGGTGACAAAGCCCACATCATTACGGAAATGAATAAGAAAAAAACAGAGACAACGCTTTT  
AAGAATTTTTCATCACAGGTCTTAACGGTTCTTTATCAGAAGTTTTGTTCTCCCTTAAACCTGAAAAATTTG  
CCTAATGCTTTGGCAAAAAGCTCAGGAACTGGAAGCGAATTACCAAAGGGGCTAACTTCGCTTACCACCATT  
TCGCAAATACCCATCAACGTAACAATCTAAACCCAGGGCATAACAATCAGCAAAAGAAAGCTGAATCCCC  
AAAAACAACCTAATAAAAAGATATGACAATCACTTAAGGTTCAATCAAGTTCCGCAAAAATCAAATTTTGT  
CGCAAAGCAACAAGACTCCTCAACCTCCACCGGAGCCCATGGATGTAGACAAATCCATACAACTACAGAA  
TACACCTTATCCGTATCCCCAAAATCGAAATTCGGGCTCAACCAAAGAAACGGGAATACGCTCCCCCTTCG  
GTTTCAGCAACCTAACAACTCATGCGTATCAATAACCTCGAGGAAGACCATTTTTTTTAGAAGAGGGGAGA  
ACTCCCCTACATTTTTTCAGAATAGACAAAAATAAATAAAATTTTAAAAAATATTAATTGACACCGGTGCC  
ACCGCTTGTTATATAAAAAGAGGGTATATACGATAACGCAGAAGAATTAGTTATAAAAAGAATTAAACT  
GTAAATGGCTACAGTATCATAACTCATTTTTTCATAACATAAACATATTTGGCAACGCCACAGATTTTATG  
AAATTAATAATCTAGACGCAGATCTATTAGTCGGTTATAATCTACTGAAGGAGATTAAGGCAGTAATCGA  
CTTGTCAAAGGGAACCTTTGTTTTTATAATAACAAAAAGGAAAAATATTAATTTTTTACAAAAACATGTCCAA  
GAAACGGTTGGCCATTTAAAAGTTCAGACGAAGCCTATAACGTTGCTTCGTATTTGAACTACCAAAGTGG  
GAAATGTAAATCATTTTCTTTATTTAATGTATCCGATACAGAATCATCGTCTTTAAGTGACGCTGATAACC  
CACGTATCGAAAAAACTAAAGTTGACGATATTCTTAATGAAGGAAAGCTAAAGAAATTAAAACTCAAAA  
AGAGCAGACGTCGAAAGATGTCGGTATCCTCTACAACAAGTTCTTCTTTATGCAAAATAAATCATTCCATT  
AATGAAATGGATAATTTGAATATCCTTGAGCAACAAGTCGTTCAACAAATAGAAACAAAGCATTCTCAGA  
TTCAAACATGTCTCCCTTTTAGAACAGATATTAGAGGAGAGATAAGAACATTAAACGAAAATGCAATTTA  
CAGTAAACAATATCCTTATCCTCATTTCAGCTAACAATTTTGTAGTCAGGAAATAAACAGGATGTTAAATG  
AAAATATAATAAGGCCCAGCAGAAGTCCTTATAATGCCCCGGTATGGGTAGTAGGGAAAAAGGTTTAAAT  
GAAGATGGAACGCCTAAGAATCGATTGGTAATAGATTTTAAAGAACTGAATAACGATACAATCCCCGATA  
GGTATCCAATGCCTGATCCTTCAGTCATTCTATCCAACCTAGGCAAAGCCAAAATGTTTTTCGACAATTGAC  
TTAGAATCGGGATTTTCATCAGATTCTAATGAAAGAAGAAGACATCGAAAAAAACAGCTTTTTTCCATTAA  
AATGGAAAAATATGAATTTCTTCGTTTGCCATTTGGGCTTGCGAACGCGCCAAGCATCTTTCAGAGAGCAAT  
GGACAATATATTACGTGAAAAAATCGGAAAAACTTGTACATTTATATGGACGACATAATAGTTTTTCAA  
ATACCCCGGAACAACATTTTGATGATTTACAAGAAATCATTGAAATTCTATTCAAAGCAAACATGAAAAT  
ATCCTTGGA AAAATCAAAATTCTTTAGAAAAGAAATAGAATTTTTTAGGATACATAGTATCATACAATATC  
ATTAAACTGATCCGAAAAAAATAGAATCAATCATGAAATACCCTCCTCCTAATAATTTAAGGGAATTAC  
GAGGTTTTCTTGGCTTAACAGGCTACTACAGGAAGTTTGTA AAAACTACGCGACTATAGCAAAACCACTC  
ACTAAATTGTTACAGGGACATAACGGTATGGTTTCAAAACATATGTCCAAAAAAACAGAAATATCTCTAG  
ACGAAGAAGCAATCTCTGCGTTTGAAAACCTTAAATCACACTTGATTGCAAACATCGAACTAACTCAGCC  
AGATTATACAAAAAAAGTTTCGTCTCACCACAGACGCTTCCGACATCGCCATAGGCGCCGTCTTTTACA  
GGAAAACAAACCAATCACCTTTGTTTCAAAAACCTTAAATAAAACAGAAAGAAATTACGCCACAAATGA  
AAGGGAATTATACGCCATTGTATGGGCATTAAAAAACCTTAGGAACTACTTGTATGGTGTTACAAATTTA  
GAAATCCAAACAGACCATCAACCACTTTCTTTTGCAGTTTCTGCACGAAACCCTAACTCAAAAATGAAAA  
GATGGCATGCTTTTCGTAGAAGAATTTTCCCCTAAAATATTTTACAAACCAGGATCTACCAATGTCGTCGCT  
GACGCGTTATCAAGGGTAATGATCAATCATATTTCCAATGAAAGTAATCTCGTGTCCGAAGAAGAACCGT  
CGTCCGATAATGAAACTATCCATTACGCCGACAGTAGTTATAAAAGCGTAATTGAAGAAACACACAAACC  
ATTGAACCAATTTAAACAACAATTACTTGTTTCTAAAAACAACATAACAATTCATGAAAAATATGAAGTTT

TCAACAAAACAAGACATATTATAGAATACGACACAGTACACAATTTAATAATCATACTTAAAGAATTTCT  
TCAACCAAACCTGACTACAGGAGTTCATTGCAGTCTCGAAGATTTATACGAAATCCAAAACCTCATTAAAA  
ACACTTTTAAACAACAAATTTTTATTTACTAAAAAGTTTGTCTAGACATCGAAAAACAAAANGACCAAGA  
AATTATAATAGAAGAAACACATGCTCGTGCTCATAGAGGTTTGGACGAAAATCTTAAGCAAATTTCTCAA  
TACTATTATTGGCCAACACTATATAAAACCCCTTAAGCAACACATACGCTACTGCGAAATTTGTAATAAAA  
ATAAATATAACAGAAACCCTAAGCAAATTCCTATTTCTAAAGCCCCTATTCCGGAGAGAGAAGGTGAACA  
ATTACATATTGACATTTTTATGCTCAAAAATTAACATTCTTGACATGCCTAGACGCATATTCTAAATTTTTA  
GTGATTAAGGAAATCAATGACAAATCAGATATGGCAAACAAAGTGTTGGAACCTTATCCAACTTTTCCTT  
TCGCTAAATCCATAATGATGGACAACGAACCTACGTTTTCTCGACACAAATCGTCAATGTCTCGTTCAGG  
TATAGCGATTTATCATGCAGACCCCAGACACAGTTTAAGCAACGGTCAGGTAGAAAGAGTTCATTCAACA  
ATTATCGAAATTTCTCGTTGTATTCAAGAAGAATACAATATAATGGATCATTCCGAAGTCGTATACCGAGC  
AGTNAAAGAGTATAACAACACAATTCAATCGACAACCTCAACAAAAACCATGTGACATATTATTTAACAAA  
ATAGAACACCCAAAATTGTCAGAAAAATTAATAATCAGCCCAAGCCAAAATGTTAGAGTACCATAACAAA  
AAAGAGGTACCAAAAAAATTACCAAGTAGGTGAAATAATTTATGAAAAAAACATGGCGAACGGAACAA  
ACTACAACCTAGATTTAAAAAACAGGTAGTTAAAGAAGACTTAGGAAATAAAGTCAAAATAAACAAATAG  
GGATCGTATTATTCACAAAGACAATATCAAATTTCTAACCTATTTTTATGTTTTTTTTAATGTATTTTTAGAAT  
GCACATTTTATGTATCTTATCTGTTNTACTGCCGTTTTGCGGTGCAGACATTATTAATTATTCAAATGATGA  
CTATGTCCTACTTGAGGATACAGATAATCTTTTTTATACGAAGCATAACGGAGAAGTTTTTTCACGTTACTA  
ATCTAAGTTTTTATAACGATATTTTTNTAAAAAGAATTAATTTTTTTAAAAACAAAAAAACAATACAATT  
GATCGGGAAGTAACCTTGGAATTGAATTTAATCAAAACACTCCTTTCTGAACCTACACCTCACAAAATTGC  
CAAACGTAGTATCAATGAACCTAGGCACAATTTTTAAATGGATCACAGGAACACCAGACCACGATGACATG  
ATACTATTCAAACCTAAAATCAATGAACCTGTTCAAACAATAATANGCAAAATCAAATCAATTCTGCAA  
TTTTCAAAGAAGTCACTAAAATCACAAATCTTTTAAGAGATATTAATTTAATCAGGAATTATTTATGAAA  
AAAATATCGACTTAAGTTGTTATCACTTGACCTACAAAAATCTGCTGGATACTATCACATTTTCCAAAGCC  
AGAATATTGAATCCAAAAATCTTAAATAAACAAAGACATGATAAATATATTTAATCACGAAACACTCAATA  
TCACTCTAATCGATCTTTTAGACATTTCTCTTTTCGATCGTTTCATACCAAGGTTTAATCATAGTTTTTATA  
AAATACCCTACAATTAATTACAATTGTAAGTTATACCACGCTAAAGCCATATCCCAAACAGATGGAAAAAT  
TTTTTTCGTTAACGACAAAATTGCTAAATGTAATAACACGTTTTACCTCATTGATAACTTTAAAGAGAAA  
TTTATAATAGTTTTGCCACATTAATTTTTGAACCAAACCTGTTTTGTAAATCTCCTTAATAAAAAAATTTACA  
AGTTGTATAAAATTATCCGAAAAAATTAACCAATAGAATTTATAACAGACGGCGCTATTTTAGTATCAG  
GCACAACTGTATTAACGAAACCTGGCTTACAGGCATTTACCTTGTTACATTTAAACCATAGTAACCATA  
AACAAATGTTACCTACACCAATGTAAAAGAAAAAGTTCTTAATTATGTAAAAACACAATAAATTCNCAAAC  
TACTTAGTTAGTGAATATCAAGTTACTAATAATACTGAACTTCAATTAGAAAATACAAATATACTATCANA  
AATTGTTATAAAATTAGAAAGTAATCATTCAAAAATAACCTTTTTATTATTTATACTAATTTTTATTTTTAC  
TATGGTNAAGCTTCTTAAACGCTGCCCTTAATAAATCTAAATCCCCTCAAATACTGAAATTGAAATCGT  
CAAGTAATCAAAAGTACCATAACACTCAAACCTACAGAAACAGAGNTTGACATATTAAACCAATTAAACG  
AACAAATTGAATCTTTAAAGAAATCATTAAAGAATCGGGGACGATTCTTTTAAGAAAGGAGGAGTTATCA  
CCCAGCCCGCAAGGCAATTCTTATTGCAATCATAAACAACATTTTCAGTATAAGTCGCTATCCCAATTACTT  
AGCCCTTTCAGACTTATTAGACCCGTTTCAATCACTACGTCCACTTAACGCACAGCTGCAGCTCTGCTAAC  
ATAAATATCCAGATTCCCGGCTCTAACATAAACATAACAGCGCAACCACTTAACATAAAGATTCATATTCT  
CATGCGCAATTCATAACGTAAACTAAAGACCCAGTCTCTAGAACGCAATTGCTAACGTAAACATGACTCA  
AAGCGTCTAGCTTACGCAAGCCACCCCGCGAGCTTTTAACTTTAAGGAAAGAAGCTTTAGCATAAACA  
CAGCTGATTTCGAGCATAAGATCACCGCGAGCTTTTGAGCTTTAAGAGAATAAGCTTTATCATAACCATA  
GCTGACTTGCAGCATAAGTTCACAATTGTACTTTAGTTCTAATCTTGGAATTCAAATAAATCGGAAGTCTTC  
AGCCTCCCACTTAAAAANATATTTTTTCCAATTAGTAGCCACTAATCGGTTAATTTGCATAC

>9\_rnd-1\_family-70\_\_LTR\_\_Gypsy  
AAATAAAAAAATAAGTGAATAATAATAAAANTTTTCTTTTTATAAATAAAAAATTAATTAACAAAAAAAT  
AAATAAAATGAGTGGATAATAAAAAAATTAATAAAACCGAGGTTTACAATAAAGATAAAGGCAGCGAC  
CACATAAGGAACAGCCTAAAAGCGGAAAAGTGAGAAAAAGAAAANTTTTGAAATACCTTTTGTTGAGTTT  
TTTTAAAAAAGGGGGTAAATATTTTTGTGGAATATTTTTTTGTATTTTTGTTTGGTGAAGATATAAAGA  
CAAAAAGAAAAAATAAACTAAAGAAAAAATAAAAGGAACCAAAGTGGCTGAGCAAGATCGGCGT  
AAAAGTGAAAAGACACCAACACCAAGAAAAGGAGAGAGGAATAGTAAAGGGACCGACGGAACCCCTAG  
AACGGGAAGAGAGGGAAACAGCGACGTGACTAGCAAGGAAGTATACAATAAAGGATGGAGGCAGGTG  
AGTGCCAAAACCCGGGGGTAGGCGTCCGCTGGATTACCAGCGACGCAAGAGGAGTTAGTGGCGATCG

CCCAGGAGTTTGGGCTGGAAAAAGGAGGGGCGCGTGGAGGAGCTACGTAAGCGGCTGTCCACCTACGTGC  
AGGAGGGCGGTCATTTCGACTGGGATTTGGGCTCGGCTCGCCGAGCTGGAATCCCAGTATGCTAAAACTCT  
TGAGCCGCCATCTTGGGGCGTCCCACCCGACTTTGGTGGACGGCCACGGCAAAAGTCGGAACCTGACCTC  
AGAAGCTCCCAGCTGTACGGGCTTTTGCAGGGCGCCACCCCGAGTTTGACCGTCTCGGGCGTGGAGGCAG  
TTCCTGCTCTCGGTGGAAATGAAGACCGCCGAGCAACTGCGGTCAACGCAGAGGTGGGGAGGTCCCCCTGT  
TGAACCGGGTGGTGGTCCCTGCTACACTAGGCCGCACCATCCATCGGAGGGCGAGGCCACTTCCCAATGTC  
CCGGAGCAAGTTCGGAAGTGGGGTATGAGGTACGATGGACGCTCCGACCCCCTTGGGTTCTTAGAGGACC  
TCGAGGAGCGCGCTATCACCTATGGTATAGCCCTCGACCGTATGCCAGGGGCAATGAGCGAGGTGTTCTG  
CGATAGGGCTGCTCGTTGGTTTCTGAGCAGTGGGCTAAGGGATGTGCCGTGGGGCCGTGTTTAGGAGGGAT  
TTCTTGGAGTTTTTCTTGCCCCCTCGTTACTTCGAGAGGGCTTGAGGACGAGATCCGATCCCGGAGGCAGCG  
CGTAGGTGAAGCGTTCAAGGAATATTTGATAGAGCTGAGGGCTCTTATGCACCACGCTAGATACGAGCCG  
GCACAAGAGCTGCATCGGATCTACGAGAACGCCGCTCCGGAATACAGGCTCTATGTGCGACGGCAAGACT  
TTTCTACCCTATCCCAGCTAACTCAACTGGCCGTTAGAATACGAGACCGTCGTGAGGCAGAGGGCGGAGTA  
CTCAGGCAGCCAACCCCTTGGGTGAGGGTGTCTCTAGTTCAAATAGTGCAGAGTGGGGCGAGGACGGCGCAG  
TCCTCGGGACATCTCAATCCGTTCCGGTCTGCTCCCAGCGGATCCGGGACGACCGTTGTGGACAACAGGG  
TCTCCACCCACCCGCTGCAACTCACGCAGAGGTGGCCCATCAGATGATGAGCCAAGAGGCCGGGAACGG  
ATATGATCCGCGACGGGCGTGTCTGATAGGTGCGCACAGGAGGGGCATTTTGCCAGGGAATGTCCCAACGCC  
CCTGTCTTATTTTGTGGTATGTGGAAGCCGGGGCCGAAGTAGTCGGGAGTGTTGCCGCCGCGCGGAGA  
CGGGGGAAACGGGCAACGGCGTCTCGGACCAAGGATCGGGTCGGCGCCAATACACGCGGAACGCAGCA  
ATAGGACACCCACTGAAGGTGGACGGTGGCCGGATCGTCGCTACGGTAGAGATTGGCGGACGAACGATG  
CCCGCCACGATCGATACCGGAGCCACTCGTAGCTTCATGAGTGAGGACTGCGTACGCAAATGGACGATCC  
GGGGAAGAGCGGAGGAAATACAGGCACGTATCCGCCTGGCAGATGGGTCCACCCTAGAGGTAGAGAAAG  
GCTTTGAGAGTAGACGCCAGCTTAGGGGGAAAAACGATCAGCATGACGATGCTCATCATGCCCTCAATGC  
TGGACCATGTAATCCTGGGTATGGATTTTTTGGGGGCGATGAATACCACAATACGCTGCGGCGAGGCGGA  
ACTGGTCCTAGAAGCAGCGACGACACCGGGCGTGAGGCCGGAGGAAGGCCTCCCAAGGCATGAAAAGGG  
AGCACCTGCTCGGCTACAGAGGGAGCCGGAGGAAGGCCTCCCAAGGCATGGAAAGGGGAGCACCTGCTC  
GGCTACAGAGGGAGCCGGAGGAAGGCCTCCCAAGGCATGGAAAGGGGAGCACCTGCTCGGCTACAGAGG  
GAGCCGGAGGAAGGCCTCCCAAGGCATGGAAAGGGGAGCACCTGCTCGGCTACAGAGGGAGCCGGAGGA  
AGGCCTCCCAAGGCATGGAAAGGGGAGCACCTGCTCGGCCTACAGAGGGAGCCGGAGGAAGGCCTCCCA  
AGGCATGGAAAGGGGAGCACCTGCTCGGCTACAGAGGGAGCCGGAGGAAGGCCTCCCAAGNCATGANAAAG  
GGGGCACCTGCTCGGCTACAGAGGGAGCCGGAGGAAGGCCTCCCAAGNCATGAGAAGGGGAGCACCTGCT  
CGGCCTTCGACGGAGAAGGCCGGGAAAAAGGGGAGTAAAGTCCGGCCCCGAATCGACAGCCTGGAGAACCC  
AAGAGGTGGCGCATAGAGCTGCAGAGGCAGACTTCTAATGGCTACGGAAGCGGCACGGCGGGAACGTGC  
AAGAGAAAGGACGGAGTAGGAGCGATGACCAGAATCCACACGGACATAGAAGGCCAGGAGCGATCGCC  
AGAATCGAGCGGCCATGGAGTTCTGTCTGGAGTCGAAGTGGTGCCAGGAGGGGGCGAGAACGGCATTGA  
AGAGGCGGAGTGGCCAGCGGATCTGGATCCAGAACTGAGGGAGTTCTTGAGTCAAGAGCTGGCTCTCTTC  
GAGGGGCTGCAGGGAATCTCGCACATCGCGGAGCACCGAATCCGGCTGAAGGATGACAAGCCGTTGAAA  
CAAAGGTACTACCCCAAGAATCCGGCCATGCAGAGGGTGATCGACGAGCAAGTGGATGAGTTGATCCGG  
GCAAATGCCATCGAGCCGTCGCGTAGTCCGCACAGCGCCCCGATCGTCTTGGTCAAGAAGAAGACTGGCG  
AGTGGCGTATGTGCATTGACTACCGACAACCTAACGCGCATTCCATTCCGGACGCTTATCCGGTGCCTCGT  
ATTAACCACATCCTGGAGCGGTTGCGCCACGCCCCGGTTCATCTCCACTCTGGATTTGAAGCACGGGTACTG  
GCAGATACCGATGGCAGCCGATAGCCGGGAGTGTACGGCGTTACAGTCCCTGGAAGAGGTCTTTTCCAA  
TGGCGGGTGATGCCATTCGGCTTACACTCGGCGTGTGCGACATTCCAGCGCGCTTTGGATACGGTAATAG  
GGCCGCAGATGGAGCCTCATGCGTTGCTTACCTAGACGACATCGTGGTAATAGGAGCGACGAAAACACA  
GCATGTAGAGAATTTGAGGGAGGTATTCGCGCCGGCTAAGGGCGGCCAATCTCCGGTTAAATAGGAAAAA  
ATGCAGCTTCTTCCGGGAGAGGTTAGTCTACCTAGGACATGTAATTTGCGGAGAAGGGATACGGACCGAT  
CCGGAGAAAGTGGAGGCGATACGAAACCTGAGGGGCCCAACAAATTGCAAAGAAGTGCAGACAGTGTCTC  
GGGATGGCGTCATGGTACAGGCGTTTCGTACCCAATTTGCGGACCCAGGTACAGCCACTCACAGCGCTCTT  
AAAGAAGGGGCAGAAATGGGCATGGGAGCAAGAACAGGAGGAGGCATTGCGTCAATTGAAGGAGAGCT  
TGACGACTGCCCCCTGTGTTGGCTTGCCCCGACTTTTCCGCCAAGTTCGTCTTGCAGACTGACGCGAGTGAG  
TATGGCCTCGGTGCAGTGTGACGCAGACGATCGATGGACAAGAGCGGGTGATAGCATAACGCGAGCCGA  
AAGTTGCTGAAGGCCGAGGTAACTATTCCGCCACTGAGAAAGAGTGCCTGGCAATCGTGTGGTCGATCC  
GGAAGTTGCGTTGCTACCTAGAAGGGTACCGATTTCGACGTAATAACGGACCATCTAGCGCTCAAGTGGCT  
GAATTCGATCGAGAGCCCGTCAGGAAGGATTGCGCGATGGGCATTGGAAGTGCAGCAATTCCAATTTGAC

GTTCATTATCGTCGAGGGAAGCTCAACGTCGTGGCCGATGCCCTGTCGAGGCATCCTCTAGAGACCTGTCA  
ACAAGCAGTGGTGGCCGAGGCCCCCTGCAAATGGGTGCGGAGGATGCGTGTTAGAATCGCCGAAGAGCC  
AGCCAAGTTCCCGGATTACACCGAGGAAAACGGACAGCTATATAGGCATTTGGGTACCCGGATAGACGAT  
GAGGACTACATCCCTTGAAACTATGCGTAGGCAGTGGTCAACGCCAGAGGGTACTGCGGGAATGTCATG  
ATGCTCCACGGCCGACATCAAGGTGTCAGAAAAACGGTGGCGAGGTTAGCCCAGCGGTACTACTGGCC  
GGGTATGTTCCGCGATGCCGCCAGATACGTGAAATGTTGCGAAGACTGCCAAAAATTCAAGAGTGAGCAA  
CTCAAACCGGCTGGTTCGATGCTGACGAGGCAGGTGGCAGAGCCGATGGCGGTACTTTGCGCGGACTTCG  
TCGGACCCCTTCCACGGTTCGAAACATGGAAACACGATGCTATTGGTGTTCCATGACGCTTTCTCGAAATGG  
GTGGAGTTGGTCCCTCTCAGAAGAGCCACGGCAGCACACCTGCAAACCTGCGTTTCGAGAGAGGATTCTAA  
GTAGGTTTCGGGGTACCTAGAAAGTTTGTGTGCGACAACGGGGTACAATTTACGAGTCGGAGCTTCAAGTC  
ATTTTTGGGGTCCCTGGGTGTAGAGATCCAGTATACCGCCCCGTACTGTCCGCAAGAGAATCCCCTGAG  
AGGACTAACCGGACTGTAAAGACCATGATAGCGCAATTTATTGAGGGCCACCAGAGTTCGTGGGATGAAC  
TCTTGCCCGAGATCTCGCTGGCGGTCAACACGAGCGTGGCAGATTCAACGGGGCTTTAGTCCCGCTTTCCTG  
ATGCAGGGCAGGGAACCTCGGTTACCCGCAGCTCTGTACGATCAGGTAACCTCCGGGGTCCGCAACTAGTG  
CGCTCGACCCTAGGACAAAGGCGGATAGGCTAAAAGAAATTTTTGATATCGTCCACAGCAACCTCCAGCG  
CGCATCAAAGGACCAGGGCAGGCATTACAACCTTGCGGAGACGAGAGTGGCGGCCCTCGTTGGACTCGAT  
GGTCTGTGAGGCAGCACCAAGTTGTCCAACGCTGCCGAAGGTTTCGCCGCAAAGTTGGCACCCAAATTT  
GACGGCCCCCTACAAAGTCGTCAAATTCATATCCCCCAATATTGTGCGGCTGGTGAAATCAGACGACCGCA  
AGAAGAGGGTGGCCAAACATCTCACAATTGAAACCATTCTACAGGAAGACGACGAGCGACGAAGAAGACG  
AAGATCCAGGGCACGCAACTGCCACGAGTAAGCGAAGGATGAGAGCAACACCCGTCGCCCAACGAAAC  
TATTATGATTAAGCGTAGATAAACTAACATTAACAACATAATTCAGAATAGGCATAGTAAAGTGTGAGC  
CGCACTGAGAGAATAGGGCATTAAACAATAAGTAAAGAGTAAGTTAACCAGTAAGCTGAACCTTTCAGAT  
GGAACCCGAAGTTATCGTCATATCGTCAGACGAAGACAACAGCAGCGGGGACACCGAGCCTTTCCCCGGG  
CCGGGAGCCGACGGCCGTCCGCGTGAAGTCCACGCCAGGGGCGTGAGTACCATAGAAGAGAACGGCAAGA  
AGGACCGCCTCGCCAGTTCCGCCATACACTATTCTCCCGGCGGACCGGCATAATGGAGAGGCTAGACGGG  
ATGGTCTTGCTGATGGCAGTCGAGGTCACGACAATGTTCTGTGGAGGCACCGTTCGCCCGGAACCTCGCCAC  
CGTACGCGGAAGAGCCTGCATCTCCGCCCTCGCATCCCACTCGGCACAATCATCAGAGCCGGCAACCCC  
AACCGCGGCCGCGGAGATGGACGAGGAAGAGTCCGCACCGTTTCGGAACGGAGGAGCACATAACCACGAGC  
GCAGGACGTGGAGGCGGTAGGAGAAGAGATATCCCCGTCGGCCGAGACGCGGAGTCGCCACCGACGGA  
GGTGCCGAACGGCACCCGCGCAAACGACGGGGAAGCAGACCCGCTGAGCCTCGACCCAGAACCCTTAGT  
GGGAGGGGACCCGTCAACGGAGGACGAGCCGGAATTCCGTCGCCGCTTTGCCACCCACCGTCTGGAGGTA  
GACCCGGGCAGCCAGTTTCCAGGATAACGCTGCGGTACCTACCAAAAGTCCCGCGGTAGCCAACAAC  
CCCGTCTGAACCCCGCAAAGCGCGAATGGGGGTGCCGAAGAAGGCCCGGCGGAAGCGCCGACGCAGC  
CGCCATCGTCGACGGAGAGCCGCCAGGGGCGAGCGTCGCCGGAGTGGGAGGCCATCGCCGACCCAGTCC  
CGAGGGAGCATCCTCGTCGGCCACGAAGAGGCTTCGCACGGAGACCGAGAAGCCCGAAGGATCGCAGCG  
GTGCGTGCCGCGTTTCGCCCCGCGAGCGCCAGGAGGGTCTCCCCAGCTCGGGAAGGATAACCGCCGCTAC  
CAGATCGCTTCTCGAGGAGGGCATCCCGAACCCTGGCCGATACCGATTGCGGTCTGCCAGATGGTTCGTGG  
AGGAGCACAAATCTCAGCACCAAGGACGCGGCGAAGTTCGGCCGTTTCCCCAACCCGCGCCGAGGCGCCAG  
ACGGAACCTTTCCTAAGGAATCGGAGGAGGAGTGGCTCGACGACGAGGACGAGATGCCCGCGCTCGTGC  
CCGTTGCCCGCGCCGAGACACCCGACACCATCGCCCGGCGGGGAGTTAGAAGACGCCTGGTTTCGGCCAAG  
AAGGCAAGGCGCCATCCCGAAAAGGTTCCCTTACGGTTTCGCCAGGAAGGCCGGGATGAAGTCTGGNCCG  
AGGAAGAGGACGCGGTGGTGACGGCTCCGTCGCCAAGCTTTCGAGTCCAACCCAGGATTCTCCCCCTC  
GGCTCTAAAGACTCCCACGGAGAGCGAGTTGTGGGACGACATAGTGGACCTTTTTCGACGGCATCGACGG  
GTGGGACACTAGCCTGGACTCAGTGCTGGAGGAGGAACCCGACGCCGAGGTCGACACGGTCGCCCGCAG  
TGCCGACGTGAGGGTCACACCGGAGAGCCACCCCGAGAAACCCGACACCGAGGTCGAGGCGATCGCCCA  
CAGTGCTGACGTTGGGGTAAAACCGGAGGGCCCCGTCGAGGAACCCGTGCCCGATTCCACCCCTCAGGC  
TGGAAGGTGTTTCCCCTCGGAACACCGTTGTCGTCGGGCGTGTTGGACCTAATCGCCAGAGAGGCGCGAA  
TCCGCCGCTTCCGGTGCCGACGTAAGTTCGGGTTCACGTCGCCGACGGGGAGAGCGAGTACAGCGTTACGCT  
GAACGCGAAAGGCGACGTGACCGTCAACCGTCCGAAGCGAG

>9\_rnd-1\_family-439\_\_LTR\_\_Gypsy

TGTAGCATGCGTACATATGTATATACATACATATGAATAAGGCTGCAACACTTTGTTGTTATGCCAACAGA  
ATGCAAACATAAGCAGCGACTTTGTGCGCAGCGCGCCTAACGCTAAGTGCCCTCTGCGCATATTCAAGTGC  
AGACGAAATATGATCCGCACTTGATAGCAACGACCCGCCAAATAGCTAAGTCAGCGTTCTCACGCTTGAC  
CGTCGCTGTGTATACATATGTGCGCGCATGACTCTCTGACTCTCTTGTGTATATAATAAGCCTNAAAA

CCATGTATGTAAAACGGCTGCTCACTGCTTCACGGTGGACAGCTCTAACTCCAAAAACATTGAATAAAGA  
ACCATCAAGGAAGACTGACGTCTTTTCATCAGGGACTATTATATTATATGGCGACCGTGACTAAGGTCAC  
AACAGACCTGGACATGGAAGGACAGCAGCAACGGCAGTAACAAAAACACACAACAACACTATACAAA  
ACAACAACAACCTATGAATCGTGTTACAAGTGATGACCAGCAGTCAACAAGTGTGAGAGGCAATCCGTCCC  
TTACGCCAGCGCGGGAGACTTAGAGATTGAAAGGAAAAAAAAAACTGAAAGTCTGAGTGAGTAGAGTG  
CGAGTAATGGGCAAGCGCGGAGGCCAGAAAAACAAAATAAACAAAAGAATAGCACACATTAAGTGCGTA  
TTATACACGAATACGCCGCCCGCNTGGGCAACGGCACAAAAGTTAACTGCCGAACCTTGATTTTCTGAAAG  
AAAGCCTCCAGCAAAGAAAGCCAAATACCGCAACTCACTCAGCAAATATCAAAGTTATANGTGAGAAAC  
AAATAANAANACCACCACCTCCGAAGCCGTTGCCGAAAAACCTGACGTCTGCCCCGAACGACTGCCCTGGA  
CCGCTATNCGCCGCAGCATGCAANTCCACGTGCTTGGGACCAAAGAACGACCNGTGCGANGACCGGCAC  
CGGCCCCGCCTGAGCCAATAGGCCCNGGACATCAGCAGCAGCGAAGCAACAAGCGCGAGGGGCACNCCG  
CCACTTNCGCCNACGAGGGGAGCGTCAGCGTAGCCAAATCCGGCGACGACCAGCTGACGCGGCAGGACAA  
CTGGACATTTGGAGCATAACTACATTATTATAATAAAATTTGTAAAATTTGTGCGGAACAATCTCCGCTCAA  
TTAGAAGTATAGCCNGTAAAGCTATACAAACCGATAGGTAGAAAAACTTGTTAACGTAAATGCAAAGCA  
ATAATTTTTTAAAATATATATATATATATATTATCGAAACAATTTATGTAAAATTTGAGCAGAAAATCTTT  
TGCCCAATCAGAGGTGAGGCCCATAAAGCCAAACTAAAAAATTAGGCAGGTTGCAATGTAAAAA  
ATTACACGTCTCAGGCACTGGGTAAATTACCCAGTAGCAAACAAATTAATCCAAATCTTAAATTCCAAAT  
AAATTTGAAATTTTAAAATGAAAAAANAATAATAAGTTTTTCAGTTCAGTCAGTTAAATCAGAAATAAAA  
AAAAAAAAAAAAAATTGAATCAAATTTATGAATAGTAATACAATAAGTAAATTTTCCGAAGATTTTCTAAT  
TGAATCAAATCATAATCCTGAACAGAACTCCAAAATGGGATTATTAGACGTTAAGTCAGTGGATTCCACT  
GCTAACGTTATAAATAAAGTTGAATCAAACAACACAGATTTAGAATTAACAAATATATTACTGGTAATCA  
TAGTTGTTATAATGTGTGCAAATTTGTTTTATAAAATATATAAACTGCATAACAAATGCCTAAAAAAGATT  
CATGAGCCGAGCAAATGACTTGGACAAAATTTAAATTTGCACAGCACAAACAACAATGATTAATCATAAT  
TGACAATATCATAATAACTATAAGATACCAATTAACACTAAATAAATAAAAAAAAAAATAAATAAATAAA  
TAATAATGAACACACAGTATGATGAATAGTAAGAATATCCCAGAATAATCTTGAAAAACAAAGTAGCTTG  
TCAATATTATGGAATGGCCAGAACTTTCTGAGCGGATCCAAAATATTA AAAACGACATTTGAAAAGCGTAT  
AAATGTCTAACACAAAATAGACAAACGCATATAGATACAGTTAATAGGCACTCCATAACATTGATCGACA  
GCTTTAACGAAGCTCGAATATTGATATATCAACATAAAGATGTATTAACCAATGAACATTGGTCAGAAAC  
GTCAAGGTTGCTAATAAGACTGAGAAATAATATACAAACAGTTAAAGACAAGCATAATTTAAATTTAATA  
CTACCTTCTATTTTGAATACACCTGCAAAGTTGGAGCTCGGCGAAAACCTTGAAGTTCGGACTGAGGATAT  
TCAATTAGAAGAAGAAGATTTAACAAATCTAACAAATCCCTGCTGTTATCACACTGGATTCCAAAGATATTT  
TATCCGAAAGTGAAGAAAGTGCTGATAATAGCCGTATAATGGTTGACACAGCCGCTGCCAGAGGGCATA  
TATTAGGAAATTGCACAAGCAGTCCCAGAATTTGACGGAAAGAAAACCCGTCTTGAAAAATTCTTAACGG  
CATTAAAGACTTGTCAACTTAACAAAGGGAACCTTATGAGGAAATTGCCATAGAGTTGATTAAATCAAAANA  
ACGGGCACAACCCCTCAACAAAATAAAAAATGAAACCACAATAGACGGAATTATTGCAAATTAAGCCG  
TAGTTGTCTGGTGAAACACCCGCCAACATAAAGGCCAAAATGGACACTTTAACGCAGAAAGGGCAAAACAGC  
CACTCAGTTCACAACTGAACTAGAAAATCTGCGACAGCTTCTTGAAGCTGCTTATATTGACCAAGGCATAC  
CATCTGAAAATGCTGACACACTCAGTACTACAGAAGCCGTTAACACAATGATTAGTAAAACTAGTCACGA  
AAGTGTTAAAACCGTTATGGAGTCTGGTATTTTCACTACCATGGATGCTGCCGTTAGTGCATACATCCGTA  
CTAGTACAAGACTTACTGGTAGTGTGAATACAGTGATGTACTCTAAAAGAGGGAATAACAACACTACCGCGG  
TAGTAACAATCGTGTTAACTATCGTGTTAAAGGCAATGGTAACCTACCAAAACAGAGGAAATAATAACTAC  
GGTAATCAAAACCGTAGAGGCCGAGGAAATGGAACAACAATTCCAACCGAGGCCGAAACAACCAAAAT  
AATAATAATACAAACAATGTTAGAGTAACCCAGGACAATCAGGGAAACTCTCAACAACCCCTCAGATATTC  
AGCAGTAGGAAATTATGCAGTTCATACCATCAATCTTAGTTTGAATATATTTGTAAACTTTTTCAATGTGA  
AGACAAATAAAAACTTGTATTTTTAATAGATACTGGTGCAGACATATCCCTGTAAAGGAAAAATTCTGAT  
ATCTTTTCATGATATCCAAAATAAGAAGATCAATATTCAAGGCATAGGCCAAGATATAATACAGTCCAAA  
GGACTGATTTCAATAGAGATACAGACAAGTAAATACATAATTCCACACGATTTTCACTTAGTAGATTTGCA  
TTTCGCAATACCTTGTGATGGAATAATAGGCATTGACTTCATTAAGAAATTCAATTGCCAGTTAGATTTCA  
AACCAAAATGAAGATTGGCTCATAATGAGACCAAATAATCTAAATTTCCCAATTTATGTTCCAATAACATAC  
AGTTCTGGTAATAATTCCATTGTTCTACCAGCAAGATCCCAAGTAGTCAGAAAAATTCACCTATCATCAGA  
TGAAGATAGTGTACTAATTCCAAACCAGGAAATTAAGAAGGCATTTATGTTGCAAACACAGTTGCAACA  
ACCAAAAATGCATTTGTCCGATTACTGAATACGACCAGTACTGATCAAGTAGTAGATATTA AAAAATTTGTC  
ATATGAACCACTTTCGAACTACGACATAGTTCAAAAACAATCCAGAAAATAGAGAAAAAACTGTCTTATCT  
CAATTAGCTAAAAATTTTCCACCACAATTCAAAAACGAATTGACTAACTTATGCACCCAGTTTAGTGACGT

ATTCGGACTCGAAACCGAATCGATCACTACCAATAACTTCTACAAACAAAACTAAGATTGAAGGATGAT  
GAACCAGTCTACATAAAAAATTATAGAAACCCCTCAAAGTCAAATAGATGAGATACAAGTACAAGTACAAA  
AATTAATCGACAATAAAATAGTCGAACCGTCTGTATCCCCTTATAACAGCCCCTTTTGTAGTTCCGAAG  
AAATCTCTTCCAGGTTCTGACAAGAAAAATGGCGATTAGTAATTGACTATCGTCAAATTAATAAAAACTG  
TTGTCGGATAAATTCCCGCTGCCTAGAATTGATGACATTTTGGATCAACTAGGAAGAGCAAAATACTTCTC  
ATGCCTTGATTTAATGTCAGGATTTTCATCAAATTGAACTCGAAAAAGTTCAAGAGATATAACGTCTTTCTC  
AACAAAGCAATGGCTCGTATCGCTTCACGCGATTGCCATTCGGTTTAAAAATAGCGCCGAATTCTTTCCAGA  
GAATGATGACTATAGCATTTTCCGGATTAGAACCCTTCTCAAGCTTTCCTTTATATGGATGATTTAATAGTC  
ATTGGTTGTTCCGAAACACATATGCTCAAAAACTTAAGTATGTTTTTGGAGAAATGTAGGAAATACAATCT  
TAAATTACATCCTGAAAAATGTTCATTTTTCATGCATGAAGTCACATTTTGGGACACAAATGCACGGATAA  
AGGAATCTTGCTGACGACAAAAAAAACGACGTCATTAATAATTACCCAGTTCCACATGATGCGGACAGC  
GCCAGACGATTCGTTGCATTCTGCAACTACTATAGACGTTTTATCAAAAATTTTGCCGACTATGCTCGTCA  
CATAACAAGATTATGTAAAAGAGATGTAGAATTCGAATGGACAGCTGATTGTCAGCATGCTTTCGAACAT  
CTCAAATCGGCACTAATAAATCCGAATTTATTACAATACCCAGATTTTCAGCAAAGAATTTTGCATAATAAC  
AGATGCAAGTAAACAAGCATGTGGAGCAGTTTTAACTCAAAAACAAAAATGGACTCCAAGTTCCAGTTGCT  
TATGCATCAAGATCGTTTACTAAGGGTGAAAGTAATAAAAGTACAACAGAACAAGAATTGGCAGCAATTC  
ATTGGGCAATAACTTATTTTCAGACCATATATTTATGGTAGACACTTCAATGTCAAAACAGATCACAGACCA  
TTAACATACTTGTTCTCAATGGTAAATCCAAGCTCAAAGCTAACGCGTATGAGACTTGAAGTAGAGGAGT  
ATAATTTTACAGTCGAATATCTGAAGGGTAAAGACAATTATGTAGCGGATGCGTTATCAAGAATAACCAT  
TCAACAGCTACAACAAATAAATGGATCAATAAAGAAAGTCACTACAAGATATCAAAGTAGACAAAATTC  
CTGCGCAGGAAAAGAAAAATAGAATTGCCATGGCAATCTATAGAAAAAGCTTCAAAGCCCAACGTATAT  
AAAGTCATTAACAATGACGAAGTACGTAAAGTAGTGACCTTGATGTAAAAATATGCTATGTTTTTTAAA  
CATGGTAAGAAAATTACTGCAAGATATGATGTTAGCGATTTATATACCAATGGAAGTCTTGACTTAGGTCA  
ATTTTTCCAAAGGCTTGAAACGCAAGCCGGTATAAATAAAATCAGCCAACTCAAAGTGGCACCGTGGGAA  
AATATCTTTGAACACGTTTCAATCGATAATTTCAAAAATATGGGCAATAAAATATTAATTTTATTGAGAGT  
AGCGCTACTCAACCCGGTGACCCAAATAGAAACAATAAAAGAAAAAGAAGCTCTATTGTCTACGTTCCAT  
GATGATCCAATACAAGGAGGTCACACAGGCATCTCAAAAACCTTGGCCAAGGTCAAAGACATTATTATT  
GGAAAGGTATGACTCGAGATATTACTGAGTACATACGAAAATGTCCAAAATGCCAAAAGTCAAAGTGA  
CACGAAAAATAAAAACTCCTTTAACAATAACTGATACGCCAATACACGCTTTCGACAGGGTTATAGTAGA  
CACCATTGGTCCACTACCCAAAGTCTGAAAATGGAAATGAATACGCAGTCACATTAATTTGTGATCTGACTA  
AATATCTAGTCGCGATTCCAATTCCAACAAAAGCGCTAACACAGTAGCAAAAGCGATTTTTTGGAGAATTT  
TATTCTAAAGTACGGTCCAATGAAGACGTTTATTACGGACATGGGAACAGAATACAAAAATTCTATAATA  
AATGATTTGTGCAAGTATTTACAAATAAAGAACATAACATCAACTGCACACCACCACCAGACAGTTGGAA  
CAGTCGAAAGAAGTCACAGAAGCTTTTAATGAATACATACGTTTATATATATCGGTTGATAAACTGATTG  
GGACGTATGGATCCAATATTTTCGTTTACTGTTTCAACACAACCCCATCTATGGCACATGACTATTGTCCAT  
ATGAACTTGTTTTTCGGTAAACAAAACAAATTTATTAATAACATTTTAAATAGCACAGACACCATAGAACCTTTA  
TATAGTATAGATGATTATGCTAAGGAAAGTAAATATAGATTAGAAATAGCATATAAAAGAGCTCGAATTA  
TGTTAGAAGAAAATAAGAGAAATAATAAGGAATTATATGATAAAAAANAATAAACATAGATATATCGGT  
AGGAGATAAAGTCCTACTTAAGAATGAAACAGGACATAAGTTAGATCCAAGTTATTTAGGACCCTATACA  
GTAGAAAAGTTAGAAGATAACGATAATATAATAATTAGGGATACTAAAAAGAAAAAAGAGTACATA  
AGGATAGATTAAAATTTTATAATAATTGAATTGAAAAGTCTAATATAAACAAAGAAAATTTGTTTCGAACAA  
AATAATACAAAACAATAAAAAAGGAAAATGGAATTTAAGAAAAGGAACTTAAAAAGAAAGAAAAATTCT  
TTTCTTTTATAAAAAAGAGACAACATTTTAAAATAAAATACTAACACATACATATTTTTTTTTAAATACACA  
TAGTTAAACATATACATTTACACATACATATTAACAAACATTTTTTATATTAATAAATAAATAACACAAAA  
AAAAAAAAAAAAACAAACAAAAATAATTAACATTAATACTTAAAATAACTACATAAATTACGTTATTTTTT  
AAAAGGAGGGAGATGTAGCATGCGTACATATGTATATACATACATATGAATAAGGCTGCAACACTTTGTT  
GTTATGCCAACAGAATGCAAACATAAGCAGCGACTTTGTGCGCAGCGCGCCTAACGCTAAGTGCCCTCTGC  
GCATATTCAAGTGCAGACGAAATATGATCCGCACTTGATAGCAACGACCGCCCAATAGCTAAGTCAGCG  
TTCTCACGCTTGACCGTCGCTGTGTATACATATGTGCGCGCATGACTCTCTCTGACTCTCTTGTGTATATA  
ATAAGCCTAAAAACCATGTATGTAAAACGGCTGCTCACTGCTTCACGGTGGACAGCTCTAACTCCAAAAA  
ACATTGAATAAAGAACCATCAAGGAAGACTGACGTCTTTTCATCAGGGACTATTATATTATA

>9\_rnd-1\_family-145\_\_LTR\_\_Gypsy  
TGTGTAAGTTAACAACAAATAAATTCATACAGTCCCAATAAGAAGCATTGCAACACCTCATAAGAAGTGC  
AGCAAAATGCTGACTTGGTGTCTGTGCCATTTCTCCACGCGCCGACTGGCAACCGCCGAAAATTCCAAG



AAGAATTGCCCAACGGGCCAACACATCAGCAGCGACGCCGCTGCCAACGCCGCTGCCGCTAAGCCACA  
GGTTACTAGGGCTAGAATTGATTTAAGTTTATTTCAGTTGCAAATTAACATCAAATAAAGGAAGTCTTGCTT  
CCCTAAAAATTATATTTTTTTCATCGTTTAATAAACTTTGGAATTAAGTGGCGCCCGAGCAGGGACCGGCTC  
GTGTTACAACAGAACAAAACGCTTCTACGTACGCGTTAGTCGGTTATACGCGAAAATAAAACCAGTGCAA  
CTCTCGTCGATTAAATTCAACGATCGGTTAAATTCGCGAAAGGCAATTGGAACCTAATTGTTCAATTTTGC  
CCATCGGTGGACAACGCATCTTGTAAGGCCCCGCCCGCAGGATACTCTCAACAAAGACTGGTCGCAGGATC  
CCCAGTAGATACCCAAAGGCTTCAAAGGATGAAATCCGGACCGGCGGGGAGGTTGCCACATCAGGAAT  
AGTACTGTAAGTTAGAAATTAAGTGAAAAAACAACGAACAACTGANACAAAGTTATAAGA  
ATAATAAATACTAAAAATTGTAGAACGATAAGCAAGATAAAAAAGTGTAACGATCAACAAATATAAA  
GACTACGAACGTAGTATAAATTATTTCCAACCTTTGCGACTCCCAAGGGACCTCCAAAGTAGAAGGAAGA  
AACCAGCCACTGGTTTTAAAAAGAAAACAAAACGATCAAAAATTCAAGTAAAATATAGAGTAAAACTA  
ACACTAGATTTAAATATACTTCGAAAATATCTTAAATATACAATATAAGTAATATATCTCGTTTATGGCT  
AATGAAAGCAATTTAGTTAGGCCCCCAATAGTATCAGATCAACCACAGGTAGGCGGACATAACTCGAACA  
GACAGCAACAACGACATATCGACAGACAAAACGAACATTTACAAAATAGAGTCATGGCGAATAACGCAG  
AACAGATAATAGCAGCCACGGTTAGCCAGATTTTGGCACAACAACTGCCGACATTGGTAAAGCAGTTAGT  
CAACCCCTCTAGGGAGTTTAGTGACGTAGACGACCAACAATAACTGCCAACCACAATTTGAATGACTTA  
GACAGAGTTCCGGACATAGTTAAAAGCCTCAGAGAATTCTCCGGTAATCCAGCAGAATTTAGCTCATGGA  
AGAAGAGTGTAGATCGTATACTCTCAGCCTATGCAGCTGAGGCAGGTTCCGCCAAAATACTTTGGCATATT  
GCATACAGTGAGAAACAAAATCACTGGCAATGCCGACACGGCCCTCGAGTCGTATAATGTTCCCCTAAAT  
TGGAGCGCTATCTCCAAATGTCTCACGCTGCACTACGCAGACAAAAGAGATCTGGGAACATTAGAATATC  
AGATGACAATGTTAGTGCAAGGTAACAACCAACAGTAGAAGAATTTTACCAGGTCGTTTACAACCACTT  
GTCGCTGATATTAAATAAAGTAGGCTGCATGGAATTAATAGGGAATCCGAAACCCCTTATGACAAAAATA  
TACCGAGATAAAGCATTAGATACCTTCATTAGAGGTTTGAAGGGAGATTTACCACGGATTCTTGGAATAA  
AGGAGCCAGCAGATCTACCTTCAGCCCTTCACTATTGTTTAAAACCTAGAGAATCAAAGCTATCGCACTAA  
CATGGCTTTGAATAGAAATCAACAGACACATGCCAGAAACCCAAATAGAAATATACCACCACCTACACTG  
CCACCTCGAACAGCTCAGCCTCATTTTCGCTCAAACCTTTTAGGCCACCACCCATTAGCTTCAGGCCCAACT  
CCCGATCCATACACCTTGGCCAACCAATACAAACCATGGACCACCGACTTACAACAATAATGGACCGATT  
CCACAATATCCCAACCAACGAACCTACCAGACACAACCACAACAGGTATACATACCCAATAGACCTTCTG  
CACCAAAACCCCAACACGTCCTGAGCCAATGGACGTGGACCAAAAGCATCCGCACGAGGATGATAAACT  
ACATGAACAGACCCCAATTTTGAAGTAGGGAAAAGACCTCCACCACCAACAAACGCCACGGACAAAAACA  
AAGAAATTTCAACATACAAACAGGAGAAGAACAGACGGAGACAGAAAACACCGACAACCTATGTGACTAT  
GGAGGAATACGTACAATCAATGCTAAATTACGAACAGCAGACTGAATACGAACAGCCATTAAACGAATA  
CGCCCAACAAATTGAAGAAACAGATGACGGACAAAATACCCAATACGAACACTCAGACATTAATTTTTTA  
GGATAAAGAGCTCCTCTCTTCTTACATAGAATGTAAGATGGGGAGCGGAAAATTACTCAAATACTAAT  
AGATACAGGATCAAACCGAAATTACGTCCAACCAAAATTCGTGTCCGAGCCTATTCCAAACGAAAAACCC  
TTTGAAGCCGTCACAGTCGGCGGAAGCATTAAATACACACCACAAGTTTCGCTAATCTTTTTAATAGAA  
ACGATATAAAAATAAAATTTCTTCTTACCCACCCTAAAATCATTTGACGCCATATTAGGTAACGATAGT  
CTAAAGGAAGTATAGTGTGATACAAAGCAGCAAGAATCTACTAATAATCAAGAACAACATTTGCATAC  
CCATTAAGCAGAAAAAATAGAGGCGGTCAACACGGTAATACCACGGACAGAACATATGACAAACGAACA  
AAAAATAGCCTTAATCAACTAGTTAAAATGCACCCACACCTATTTGCCAATCCGGACGAAAAACTGACAT  
ACACAACCAACGTCAGAGCAGAGATTGGAACAAAACGACTCCCCATATATTCAAATTTTACCAATTTT  
CAATGTCTTTAAAAGACGAAGTACACAGCCAAATCAAAGAACTTTTAGAGGACGGAATCATCCGACCCTC  
CCGATCCCCGTACAATTCACCTGTGTGGATTGTTCCGAAAAAATTAGATGCCTCCGGGCAAAAGAAATAT  
CGCATGGTTATAGACTACAGGAACTAAATAAAGAACTACCGCAGACAAATACCCTATACCCGAAATCA  
ACGAGGTACTAGCACAGCTAGGCAATAACAAAGTTTTCTCTGTCTTAGATTTGAAAAGTGGCTTTCATCAA  
ATACCCCTTAAGGAGTCAGACATAGAAAAACTGCCTTCTCCGTTAACAACGGAAAATACGAGTTTACACG  
ACTCCCATTTCGGTCTCAAGAATGCGCCCTCAATTTTCCAGAGAGCTCTTGACGACATCCTTCGTGAGCATA  
TTGGAAAAATATGCTTCATTTATATTGACGATATCATTATCTTTAGCAAAGATGATGAATCGCATGCGCAG  
CACCTCGCCGCCATATTCAGAATCTACAAGAAGCCAACATGAAATGTCAGTTGGACAAATGCGAGTTCT  
TTAAAAGCAGAGTAGAATTCCTGGGATTTGTCATCTCAGACAAGGGGATAGAACTAATCCAAACAAAAT  
TGAGACAATAAGAAAGTACCCACTTCCAAAAACACTCAAAGATTTAAGATCGTTTATTGGCCTTGCCAGC  
TATTATAGGAGGTTTATAAAAGACTTCGCTAAGCTGGCAAAGCCCCTAACCTCTCTTTTAAGAGGGGAAG  
ATGGACGCGTGTCCAAAAATCAATCAGCTAAAAAGCTCATTAATCTCAACGAAGAAGCGATCGAAGCATT  
CAATAAAATAAAAATTCCCTAGTTTCGAATGAGGTAATACTTCATTACCCAGACTTCAGCAAAGAATTTCA

TCTGACAACAGATGCATCCAACTTTGCTATTGGGGCTGTCCTATCCCAGAACAAGCGACCCATTTGTTTCC  
TCTCTAGAACTCTCTCTAAAACAGAGGAGAACTACGCCACCAATGAAAGGGAAATGTTGGCAATAATTTG  
GGCCTTAAAAGCCCTCAAGAATTACCTCTACGGTAAAGCGAGTGTAATATACACCGACCATCAACCCT  
TAACCCACTCTCTTAGCAGTTGGAACGGCAACGCTAGGATAAAGAGGTGGAAAGCTTACCTAGAAGAGTT  
TGATTACGAACTCCTCTATAAGCCAGGTAGGGATAACATTGTAGCCGATGCGCTATCACGTATCCCTGTGA  
TCAATAATATTGGATCAGTAGCCTCCACCCAGCACAGTGCAGACAGTTCAAGCCACAACCTTAATTCCGAG  
CATAGAAGCTCCAATCAACGTATTCAAACCAGATATTTCTCAGTAGAGCCAACGAAACAAATTACGAAT  
TCCATATCCCATTCCCAACATTCCACAGGCATACAATTACTCGACCAAACCTTCTCAGAACACGACCTTACG  
CAAATACTGAAAGCTCATCTAAACCCATCCGTAATCAACGGAATAATAACTTCAGAAGAAATAATGAACC  
AAATTCAGCAGATATATCCCCAACATTTTAGGAACTTCAAGATTAGATTACACACAGTCTCAAGTAAAAGA  
TTTAACAAATGAAACAGAACAAAGATGAGAAGATATTGGTTACGCACAACAGAGCCCACCGCAACGCACT  
AGAAAACAAAATGCAATTGTCCGAAAGATTCTATTTCCCAAAAATGAAGCAACGAATAACAGAATTAGTC  
AAACAGTGTGAGGTTTGTAAAGAAGAAAAATACGATAGGCATCCCCTAACCCTCAAAAGAAACA  
CCAATCCCCGAATACCCAGGACATACAATCCACATCGACATATACACGACAGAAAAAACTTAGTACTAA  
CAGCAGTAGACAAATTCTCGAAATTAGCTCAGGGACGAATTATCAAATCTAGGGCAATAGAAGACATTAA  
AAACCACTTCATGAAATCCTTTTTTATTTTGGCGTACCTAAAGTAGTTGTAATAGATAACGAAAAATCCCT  
TAATTCAGCCTCAATCACTTTCATGATGCAGGACCAATTAATATAGAAGTTTATAAAACACCACCCTACA  
AAAGCGCAGTGAACGGTCAGGTAGAACGATTTTATTCAACACTATCAGACATAATGAGATGCAACAAAA  
GAAACAGGAATACAGAACATTCGAAGAACTACTCAACAAATCAATATACGACTACAACCTACACTATAC  
ACTCGACAACCTAACAAAGAGACCATTAGACATATTCTTCGGCAGAAACGTGACTACGGACCCAGACCAATA  
CGAAAAAGCTAGGAAGGAGAACATTGACAGACTCAAACAGAAACAATCGACCGACATGCAGAATCATAA  
CAAAAACGTAACGACATACGAACTTACATACCTGGTCAAGAAATATTTCGTCAAAGTCAATACCAGATTAG  
GTACCAAACCTGTCACCCAGATACAAAAAGGAAATAGTTAAAGAAAAATAGAAACACAACCGTACTAACAA  
CAACTGACAAAATAATACATAAAAGCAATATAAAAAATACATAAAAAATTACAGATTCCTATTAATGATGAC  
AATAAAAGCAACAGAAAGGACACTTGGAATTTTGAAGTACACAGACGCACAAACAATTACAATTCTAAA  
AGGAATAGGGAACTACAGACATCGACAACACGAATCGTACAAGTCATAGAGCTAGAACAGATTAAAAA  
CGCATTAGATAATCTCCTTTTTACACCGAAAAGACTTAACAACCAATACTTTATACCACACTTTACGTCAC  
GAAATAACGCAAGCTATTGTCACTTTCGACACAATATCACTTTTCCATAAACGAAAGACTAGAGCGATCA  
ACATTATAGGCACAGCTTGAAGTATGTAGCCGGCAGCCCGGACAATGACGACTTAATAATGCTTACTGAC  
AACATAAACAACTTATAGAAAACGACAATAAACAGCTTATCATAAACAGGCAATTAGAAGATCGAATT  
AATAAACTCACGAAAATCTCAAACGATTTAACCAATAGCATAAGAAAGGAATCTCTCATAAGTGATGAGA  
TAGCTATTAGCTTACAAAATCAAATTAGGCTCATAAAAGAAGAAATAATTAATATTAAGTACGCCATACA  
ATGGGCGAAATTGAATTTAATAAATACATTCCTACTTGCGGAAAAAGAAATAGAGATAGTAAACGATAAC  
TTTAATAAAAGCAACATGCCACCTTTAAATATTGAAGAAATGCTAGAATTTCGCAGATGTATCCATTTTGCA  
TAATGGAACCACTCTGTTTTATATTGTAAAAATTCCAAATTTAGAAGAAATAGAATGCAAAAATACTATA  
ATAAAGCCAGTAGTGAAAAACAACAATATAATAAATTTAGAATTTAACGAACTGTTTCATTGTAATAAAA  
CAATCTATGGCATAAACACAACATTTGTAAAAGATACCATAATATTAATAATTTGTAAACAATCAAAAATTGT  
AACTTGAACAATAATAATTGTATACCTAAGTTAGTTAGCGGAGAGCAAGCGCTCTGTGGCTTTAGCAAT  
GCAGATCATATCCCGGAGATCGAGGAAATCGACGAGGGACTTATACTAGTGAACGACTTCAACGGGCACTA  
TTAGATGGCAAGAAGAGAAGAAACGCGTGAGAGGCACCTACATGATTAACCTTCTGAACGAAACCTTATTC  
ATCAACAAACAAGAGTTCAGCAACCTAGAGGTCACCGTCATGACCCCAGGAAATCCCACAATACAAATA  
ACCCAATAGAAAACGAAAGAATAAAGATTCTTTCTCTGGAAGCATTAGAAGAATTGCACATCAACAACA  
TTAAAAACATGCAAACTTCAGACGCACTCTATAGCAAATAGAGTCGGTTTCATAACTCTGTTACAGTTG  
CCATCCTTCTTACCTGTGTATTACACGTAATGAAGAAAAATAAGAAAAATATAATACTGCAACTGAACAA  
AGAACAAGAGAGACCCAAAAAGAACCAGCACATATCCAAATACAAAATACAGATGCCAACAACCTCAGG  
TTCAACAACATACCTTTCTTCTGATGATCGCTTGAGGACAAGCTTAAATCAAAGGGGAAGAGTTAACAAC  
AAATAAATTCATACAGTCCCAATAAGAAGCATTGCAACACCTCATAAGAAGTGCAGCAAAATGCTGACTT  
GGTGTCTGTGCCATTTCTCCACGCGCCGACTGGCAACCGCCGAAAATTCCAAGAAGAATTGCCCAACGG  
GCCAACAACATCAGCAGCGACGCCGCTGCCAACGCCGCTGCCGCTAAGCCACAGGTTACTAGGGCTAGAA  
TTGATTTAAGTTTATTAGTTGCAAATTAACATCAAATAAAGGAAGTCTTGCTTCCCTAAAAATTATATTTT  
TTTCATCGTTTAATAAACTTTGGAATTAACCTTATACACCAAGTGCGAAAAACAATTTCACTAACCAGCGGAT  
GCCAGTAATATTGNCATACGAGNAGTGTTATCACAAGAGCATAAACCGATCCATGCAAGCAGAACACTGA  
ACGAACACGAAATAAATAGAAATAGAAT

>9\_rnd-1\_family-257\_\_LTR\_\_Gypsy

TGTGAGGCGGCTAATGAGACCAGCCACCCACAGTTTTTCACGGCAAGGAGCCGTCATCCCTTTGGCCAAA  
TTACGGCAAGGAGCCGCTGGCGGGACAACGTATTAATTTTCTTTAGTTATAAGTATTAATTATATTAGGTT  
AAGATCTTAGTGAAATAAGAGGCAAGGAGCCATCAGTAATATAAGCAGTTCGATTAGTAGCAAAGAGGC  
AAGGAGCCGCGAATATTATAATTGATTTAAATAGTGAGTTTGAATTTAACC GCCGGCCGCCGCTGCAACC  
GTGCGTTGTTCGATCGGTTGCTCAACACCGTCTTTGAGAGCGCAACTTCAATTCGGCGGCGAAGAGCGAAA  
GCTCCGAGGCGAAGTTGCGAAAGCTCGCGGCGAAGTTGAGCAGCCGAAGCGAGCGCATGGCTTGCCGGC  
GAGCGTGCCGGCACTTGTGATCGAACGTTAAGGGTGAGTAGAAGTGCTGCGCGAGATAAACGAAATCAT  
AGATGGTATAGTGGAGCGCTAGGGCTCCAGAAAACAGTGCGGCAGGGTTTAGCTTAGGATTTACGATAAG  
GTCGGAATGAATAATAGTGAATAAAGTGCCAACGTTGTAATTATCTAGAAAGTATTGGATTATTCCTGT  
TCCTGGTAACCCGGCTTACCTTAACATCGGAACCTAACCGGTGTTTCGACCTAACCTCGAACGAGGGGCATG  
CGGTACGAGATTGTGGCTCCGGGGTGGGCATTGCCGGTTGGTGTTTAGGTAGTGGAGTTGGTGCGAGGCC  
ACGGCCCGCTAGTGTAGTTGGTGCGAGGCCACGGCCCGCTAGCGTAGTGGTACGAGGCCACGGCCCGGCA  
GAGAGATAGGGCGTTTAGGTAGTGGAGTTGGTGCGAGGCCACGGCCCGCTAGTGTGGTTGGNGCGAGGC  
CACGGCCCGCTAGCATAGATGGTACGAGGCCACGGCCCGATGGTGTAGGTGTGTAGAGGTAGATCTGGGT  
TTGGTTTGGTCAGGATACTCNCCTTTAAGCCCTCTCTCCAGCGAGAAATTATAAAATAACTTGTAAC  
CGCTAGACCTGGTAAGACTGAGAATTATACCCCGGCCAGAAAGCTTCCTTACAAGTGGCGCCCGAGCAGGG  
ACCAAGAGGCGTTTAGGGGTGTGGCATGTCGGCGGATTAAGCCCGCAAGCATGCCCGAAATAGGTATTT  
TCCAAAAAAAATATATATAGGGTATTTCTAGTCGGGTATACCCTAGAGGGAAGGTAACTAGCAGAGAG  
CAAGAAAATGAGAAGGTCATGTATGTGCGAAATATGAAAATAGGGTATTAAGTAGTCCGGTATACCCAG  
AGAACATTTCTATACCTTGTGTTAGGCATAGCCAGAAAATGAACACGTGCAGCTGGTGAGTGACAAAAAT  
GCTAGCAGCAAGCCGGCAAGTAAGATAAAGAGACGAAAACATAACGGTCGGTCGTGAGAGTACAGCGCG  
CGCGCGCCAGCCGGGCGACGTGCGAGACCACGCTCGCACACGGGTGCCACACGCGCGGCGCAGTCGACG  
TCGGCGTCGAAGGACCGTTAAGGCGTCGCGGCAGCGGTTGTACAGTGGGGCGAATCCAACCTCACGCGCGG  
TGAAAAGTTGAATTCGTGAGTACAGCTGTCGGGGGCAGTGAAGTGGTCACCCTTCAAGTGAATGTGAACA  
AAGGGAACAATAAGAGCGGAACAAGTGCCAAATAAAAAAAAAAAGTGGATAATAATAAAATTTTCTTTTA  
TAAATAAAATTAATTAACAAAAAAAATAAAAAAAAAAAGTGGATAATAATAAAATTTTTTTTTTATAAAT  
AAAATTAATTAACAAAAAAAATAAATAAAAAAAAAAAGTGAATAATAATAAAATTTTCTTTTAANAAAA  
AAAAATTAATTAACAAAAAAAATAAATAAAAAAAAAATGAGTGGATAATAATAAAATTAATAAACCAG  
GGTTCACAATAAAGATAAAGGCAGCGACCACATAAGGAACAGCCTAAAAAGCGGAAAAAGTGAGAAAA  
GAAAATTTTGAATACCTTTTGTGAGTTTTTTTATAAAAAAGGGGGTAAATACTTTTGTGGAATATTGTT  
TTGTATTTTGTGTTTGGTGAAAGATATAAAGACAAAAAAGAGAGAGAGAGAGAGAGAGAGAGAGAGAGAG  
CCAAAGTGGCTGAGCAAGATCGGCGTAAAAGTGAAAAAGACACCAACACCAAGAAAAGGAGAGGAATA  
GTAAAGGGACCGACGGAACCCCTAGAACGGGAAGAGAGGGAACAGCGACGTCGACTAGCAAGGAAGT  
ATACAATAAAGGATGGAGGCAGGTGAGTGCCAAAACCCGGGGGTAGGCGTCCGCTGGATTCACCAGCGA  
CGCAAAGAGGAGTTAGTGGCGATCGCCAGGAGTTTGGGCTGGAAAAGGAGGGGCGCGTGGAGGAGCTA  
CGTAAGCGGCTGTCCACCTACGTGCAGGAGGGCGGTCATTGACTGGGATTTGGGCTCGGCTCGCCGAGC  
TGGAATCCCAGTATGCTAAACTCTTGAGCCGCCATCTTGGGGCGTCCCACCCGACTTTGGTGGACGGCCA  
CGGCAAAAGTCCGAACCTGACCTCAGAAGCTCCCAGCTGTACGGGCTTTTGCAGGCGCCACCCCGAGTT  
TGACCGTCTCGGGCGTGAGGAGCAGTTCTGCTCTCGGTGGAAATGAAGACCGCCGAGCAACTGCGGTCAA  
CGCAGAGGTGGGGAGGTCCCCTGTTGAACCGGGTGGTGGTCCCTGCTACACTAGGCCGCACCATCCATCG  
GAGGCGAGGCCACTTCCCAATGTCCCGGAGCAAGTTCGGAAGTGGGGTATGAGGTACGATGGACGCTCCG  
ACCCCTTGGGTTCTTAGAGGACCTCGAGGAGCGCGCTATCACCTATGGTATAGCCCTCGACCGTATGCCC  
AGGGCAATGAGCGAGGTATTCTGCGATAGGGCTGCTCGTTGGTTTCTGAGCAGTGGGCTAAGGGATGTGC  
CGTGGGCGCGTGTGTTAGGAGGGATTTCTTGAGTTTTTCTTGCCCCCTCGTTACTTCGAGAGGCTTGAGGAC  
GAGATCCGATCCCGGAGGCAGCGCGTAGGTGAAGCGTTCAAGGAATATTTGATAGAGCTGAGGGCTCTTA  
TGCACCACGCTAGATACGAGCCGGCACAAGAGCTGCATCGGATCTACGAGAACGCCGCTCCGGAATACA  
GGCTCTATGTGCGACGGCAAGACTTTTCTACCCTATCCCAGCTAACTCAACTGGCCGTAGAATACGAGACC  
GTCGTGAGGCAGAGGGCGGAGTACTCAGGCAGCCAACCTTGGGTGAGGGTGTCTCTAGTTCAAATAGTG  
CAGAGTGGGCGAGGACGGCGCAGTCCTCGGGACATCTCAATCCGTTCCGGTCTGCTCCCAGCGGATCCGG  
GACGACCGTTGTGGACAACAGGGTCTCCACCCACCCGCTGCAACTCACGCAGAGGTGGCCCATCAGATG  
ATGAGCCAAGAGGCCGGGAACGGATATGATCCGCGACGGGCGTGTGCTAGGTGCGCACAGGAGGGGCAT  
TTTGCCAGGGAATGTCCCAACGCCCTGTCTTATTTTGTGGGTATGTGGAAGCCGGGGCCGAAGTAGTCG  
GGAGTGTGCGCGCGCGGAGACGGGAACGGGCAACGGCGTCGTCCGGACCAGGATCGGGTCGGCGC  
CAATACACGCGGAACGCAGCAATAGGACACCCACTGAAGGTGGACGGTGGCCGGATCGTCTGCTACGGTA

GAGATTGGCGGACGAACGATGCCCGCCACGATCGATACCGGAGCCACTCGTAGCTTCATGAGTGAGGACT  
GCGTACGCAAATGGACGATCCGGGGAAGAGCGGAGGAAATACAGGCACGTATCCGCCTGGCAGATGGGT  
CCACCCTAGAGGTAGAAAAGGCTTTGAGAGTAGACGCCAGCTTAGGGGGGAAAAACGATCAGCATGACGA  
TGCTCATCATGCCCTCAATGCTGGACCATGTAATCCTGGGTATGGATTTTTGGGGGCGATGAATACCACAA  
TACGCTGCGGCGAGGCGGAACCTGGTCCTAGAAGCAGCGACGACACCGGGCGTGAGGCCAGGAACGAGCG  
AGGAGTCGGAGGAAGGCCNCCCAAGGCATGAAAAGGGAGCACCTGCTCGGCTACAGAGGGGAGCCGGAG  
GAAGGCCTCCCAAGGCATGGAAAGGGAGCACCTGCTCGGCTACAGAGGGGAGCCGGAGGAAGGCCTCCCA  
AGGCATGGAAGGGGGCACCTGCTCGGCTACAGAGGGGAGCCGGAGGAAGGCCTCCCAAGGCATGGAAAGG  
GAGCACCTGCTCGGCTACAGAGGGGAGCCGGAGGAAGGCCTCCCAAGGCATGGAAAGGGAGCACCTGCTC  
GGCTACAGAGGGGAGCCGGAGGAAGGCCTCCCAAGTCATGANGGGGGAGCACCTGCTCGGCTACAGAGGG  
AGCCGGAGGAAGGCCTCCCAAGTCATGAGGGGGGGNACCTGCTCGGCCTTCGACGGAGGGAGCCGGGAA  
AAGGGGAGTAAAGTCCGGCCCCGAATCGACAGCCTGGAGAACCCAAGAGGTGGCGCATAGAGCTGCAGAG  
GCAGACTTCTAATGGCTACGGAAGCGGCACGGCGGGAACGTGCAAGAGAAAGGACGGAGTAGGAGCGAT  
GACCAGAATCCACACGGACATAGAAGGCCAGGAGCGATCGCCAGAATCGAGCGGCCACGGAGTTCTATC  
TGGAATCGAAATGGTCCCAGGATGGGGCGATAACGGCATCGAAGAGGCGGATTGGCCAGCGGGTCTGGA  
CCCAGAACTGAGGGAGTTCTTGAGTCAAGAGCTGGCTCTCTTCGAGGGGGCTGCAGGGAATCTCGCACATC  
GCGGAGCACCGAATCCGGCTGAAGGATGACAAGCCGTTGAAACAAAGGTACTACCCCAAGAATCCGGCC  
ATGCAGAGGGTGATCGACGAGCAAGTGGATGAGTTGATCCGGGCAAATGCCATCGAGCCGTCGCGTAGTC  
CGCACAGCGCCCCGATCGTCTTGGTCAAGAAGAAGACTGGCGAGTGGCGTATGTGCATTGACTACCGACA  
ACTCAACGCGCATTCCATTCCGGACGCTTATCCGGTGCCTCGTATTAACCACATCCTGGAGCGGTTGCGCC  
ACGCCCCGGTTCATCTCCACTCTGGATTTGAAGCACGGGTACTGGCAGATACCGATGGCAGCCGATAGCCG  
GGAGTGTACGGCGTTCACAGTCCCTGGAAGAGGTCTTTTCCAATGGCGGGTGATGCCATTCGGCTTACACT  
CGGCGTGTGCGACATTCCAGCGCGCTTTGGATACGGTAATAGGGCCGCAGATGGAGCCTCATGCGTTTCG  
TTACCTAGACGACATCGTGGTAATAGGAGCGACGAAAACACAGCATGTAGAGAATTTGAGGGAGGTATTC  
CGCCGGCTAAGGGCGGCCAATCTCCGGTTAAATAGAAAAAAATGCAGCTTCTTCCGGGAGAGGTTAGTCT  
ACCTAGGACATGTAATTTGCGGAGAAGGGATACGGACCGATCCGGAGAAAGTGGAGGCGATACGAAACC  
CGAGGGCCCCAACAAATTGCAAAGAACTGCGACAGTGTCTCGGGATGGCGTCATGGTACAGGCGTTTCGT  
ACCCAATTTTCGCGACCCAGGTACAGCCACTCACAGCGCTCTTAAAGAAGGGGCAGAAATGGGCATGGGA  
GCAAGAACAGGAGGAGGCATTGCGTCAATTGAAGGAGAGCTTGACGACTGCCCTGTGTTGGCTTGCCCC  
GACTTTTCCGCCAAGTTCGTCTTGACAGACTGACGCGAGTGAGTATGGCCTCGGTGCAGTGCTGACGCAGA  
CGATCGATGGACAAGAGCGGGTGATAGCATAACGCGAGCCGAAAGTTGCTGAAGGCCGAGGTAAACTATT  
CCGCCACTGAGAAAGAGTGCCTGGCAATCGTGTGGTCGATCCGGAAGTTGCGTTGCTACCTAGAAGGGTA  
CCGATTCGACGTAATAACGGACCATCTAGCGCTCAAGTGGCTGAATTCGATCGAGAGCCCGTCAGGAAGG  
ATTGCGCGATGGGCATTGGAAGTGCAGCAATTCCAATTTGACGTTTATTATCGTCGAGGGAAGCTCAACG  
TCGTGGCCGATGCCCTGTGAGGCATCCTCTAGAGACCTGTCAACAAGCAGTGGTGGCCGAGGCCCCCTG  
CAAATGGGTTCGCGAGGATGCGTGTAGAAATCGCCGAAGAGCCAGCCAAGTTCCCGGATTACACCGAGGA  
AAACGGACAGCTATATAGGCATTTGGGTCACCGGATAGACGATGAGGACTACATCCCTTGGAAGCTATGC  
GTAGGCAGTGGTCAACGCCAGAGGGTACTGCGGGAATGTCATGATGCTCCACGGCCGGACATCAAGGTG  
TCAGAAAAACGGTGGCGAGGTTAGCCCAGCGGTACTACTGGCCGGGTATGTTCCGCGATGCCGCCAGATA  
CGTGAAATGTTGCGAAGACTGCCAAAAATTCAAGAGTGAGCAACTCAAACCGGCTGGTTCGCATGCTGACG  
AGGCAGGTGGCAGAGCCGATGGCGGTACTTTGCGCGGACTTCGTTCGGACCCCTTCCACGGTCGAAACATG  
GAAACACGATGCTATTGGTGTTCATGACGCTTTCTCGAAATGGGTGGAGTTGGTCCCTCTCAGAAGAGCC  
ACGGCAGCACACCTGCAAAGTGCCTTCGAGAGAGGATTCTAAGTAGGTTTCGGGGTACCTAGAAAGTTTG  
TGTGCGACAACGGGGTACAATTTACGAGTCGGAGCTTCAAGTCATTTTTGGGGTCCCTGGGTGTAGAGAT  
CCAGTATACCGCCCCGTACTGTCCGCAAGAGAATCCCACTGAGAGGACTAACCAGGACTGTAAAGACCATG  
ATAGCGCAATTTATTGAGGGGCCACCAGAGTTCATGGGATGAACTCTTGCCCGAGATCTCGCTGGCGGTCA  
ACACGAGCGTGGCAGATTCAACGGGCTTTAGTCCCGCTTTTCTGATGCAGGGCAGGGAACCTCGGTTACC  
CGCAGCTCTGTACGATCAGGTAAGTCCGGGGTCCGCAACTAGTGCGCTCGACCCTAGGACAAAGGCGGAT  
AGGCTAAAGAAATTTTTGATATCGTCCACAGCAACCTCCAGCGCGCATCAAAGGACCAGGGCAGGCATTA  
CAACTTGCGGAGACGAGAGTGGCGGCCCTCGTTGGAAGTTCGATGGTCTGTTGAGGCAGCACCAGTTGTCC  
AACGCTGCCGAAGGTTTCGCCGCAAAGTTGGCACCCGAATTTGACGGCCCCTACAAAGTCGTCAAATTC  
TATCCCCAATATTGTGCGGCTGGTGAAATCAGACGACCGCAAGAAGAGGGTGGCCAAACATCTCACAATTG  
AAACCATTCTACAGAAAGACGACGAGCGACGAAGAAGACGAAGATCCAGGGCACGCAAATGCCACGAG  
TAAGCGAAGGATGAGAGCAACACCCGTCGCCCAACGAAACTATTATGATTAAGCTTAGATAAAACTAACA

TTAACAACATAATTCAGAATAGGCATAGTAAAGTGTGAGCCGCACTGAGAGAATA  
>160\_rnd-3\_family-200\_\_Unknown  
TTTGGAANGTCATATCTCCGCGGGGAGTTATGTCGTTTTGGAACGTCATATCTCCGCGCGGAGTTATGTCG  
TTTTGGAACGTCATATCTCCGCGNGGAGTTATGTCGTTTTGGAACGTCATATCTCCGCGNGGAGTTATGTC  
GTTTTGGAACGTCATATCTCCGCGNGGAGTTATGTCGTTTTGGAACGTCATATCTCCGCGGGGAGTTATGT  
CGTTTTGGAACGTCATATCTCCGCGCGGAGTTATGTCGTTTTGGAACGTCATATCTCCGCGCGGAGCTATT  
ACCCGAGATATTACAAAAAANAATCATCGAAAAAGTTTCGATTTTCGCACCGATCTCCATTTTGTTCGATT  
TGGGTCAAAATTTTGGATTTTCCTTTTTTTTGATGCCAATCGATAGAACTGATCCTTACGAGTCAAAAATGGT  
ATAAAATTCCTAAATCGGACATTATTTGACGGAAATATTCCAAAATATCATCAAAAAGGTTGACTTTACG  
AACTAATGGTTTTTTTTGTCTTNAACATTTTTGAACCCATCGATGATTGATTTCTTTGAATGCCAATTGATGG  
TAGGGATCCGTACGCATTCAAAAAGGTATAACATTTTAAAATCAGACATTATTTACCCGAGATATTAAAA  
AAAAATCATCGAAAAAGTTTCGATTTTCGCAAAAAAACGTGGTGATTGGAAGGTCATATCTCCGCGCGG  
AGTTATGTCGTTTTGGAACGTCATATCTCCGCGCGGAGTTATGTCGTTTTGGAACGTCATATCTCCGCGCG  
GAGTTATGTCGTTTTGGAACGTCATATCTCCGCGCGGAGTTATGTCGTTTTGGAACGTCATATCTCCGCGC  
GGAGTTATGTCGTTTTGGAACGTCATATCTCCGCGCGGAGTTATGTCGTTTTGGAACGTCATATCTCCGCG  
CGGAACTATTACCCGAGATATTACAAAAAANAATCATCGAAAAAGTTTCGATTTTCGCACCGATCTCCATTT  
TGTCGATTTGGGTCAAAATTTTGGATTTTCCTTTTTTTTGATGCCAATCGATAGAACTGATCCTTACGAGTCAA  
AAATGGTATAAAATTCCTAAATCGGACATTATTTGACGGAAATATTCCAAAATATCATCAAAAAGGTTGA  
CTTTACGAACATAATGGTTTTTTTTGTCTTNAACATTTTTGAACCCATCGATGATTGATTTCTTTGAATGCCAA  
TTGATGGTAGGGATCCGTACGCATTCAAAAAGGTATAACATTTTAAAATCAGACATTATTTACCCGAGAT  
ATTAAAAAAAATCATCGAAAAAGTTTCGATTTTCGATTTTCGNAAAAAACGTGGTGTTTGGAAAGGTCATA  
TCTCCGCGGGGAGTTATGTCGTTTTGGAACGTCATATCTCCGCGCGGAGTTATGTCGTTTTGGAACGTCAT  
ATCTCCGCGNGGAGTTATGTCGTTTTGGAACGTCATATCTCCGCGNGGAGTTATGTCGTTTTGGAACGTCAT  
TATCTCCGCGNGGAGTTATGTCGTTTTGGAACGTCATATCTCCGCGCGGAGTTATGTCGTTTCGGAACGTC  
ATATCTCCGCGCGGAGCTATTACCCGAGATATTACAAAAAANAATCATCGAAAAAGTTTCGACTTTTCGCA  
CCGATCGCCATTTTGTTCGATTTGGGTCAAAATTTTGGATTTTCCTTTTTTTTGATGCCAATCGATAGAACTGAT  
CCTTACGAGTCAAAAATGGTATAAAATTCNAAATCGGACATTATTTGACGGAAATATTCCAAAAAATCA  
TCAAAAAGGTTGAATTTACGAACNAATCGNTTTTTTTGTCNNCAACATTTTTTCAACCCATCGATGATTGATT  
TNTTTGAATGCCAATTGATGGTAGGGATCCGTACGCATTCAAAAAGGTATAACATTTTAAAATCAGACATT  
ATTTACCCGAGATATTAAAAAAAATCATCGAAAAAGTTTCGATTTTCGCAAAAAAACGTGGTGATTGGA  
AAGGTCATATCTCCGCGGGGAGTTATGTCGTTTTGGAACGTCATATCTCCGCGCGGAGTTATGTCGTTTTG  
GAACGTCATATCTCCGCGAGGAGTTATGTCGTTTCGGAACGTCATATCTCCGCGCGGAGTTATGTCGTTTT  
GGAACGTCATATCTCCGCGGGGAGTTATGTCGTTTTGGAACGTCATATCTCCGCGCGGAGTTATGTCGTTT  
TGAACGTCATATCTCCGCGCGGAGTTATGTCGTTTTGGAACGTCATATCTCCGCGCGGAGTTATGTCGTT  
TCGGAACGTCATATCTCCGCGCGGAGTTATGTCGTTTCGGAACGTCATATCTCCGCGCGGAGATATGGCGA  
TTCGGAAGGTCATATCTCCGCGGGGAGTTATGTCGTTTTGGAACGTCATATCTCCGCGCGGAGTTATGTCG  
TTTTGGAACGTCATATCTCCGCGCGGAACTATTACCCGAGATATTACAAAAAATAATCATCGAAAAAGA  
CGCGATGGAACCNATCGCCATTTTGTTCGATTTGGGTCAAAATTTTGGATTTTCCTTTTTTTTGATGCCAATCGN  
TAGAACTGATCCTTACGAGTCAAAAATGGTATAAAATTCCAAAATCGGACATTATTTGACGGAGATATTC  
CAAAAATCATCGAAAAGGTTGACTTTACGAACGAATCGNTTTTTTTGTCAACAACATTTTTTGAACCCATCG  
ATGATTGATTTNTTTGAATGCCAATCGATGGTAGGGATCCGTACGCATTCAAAAAGGTATAACATTTTAAA  
ATCGGACATTATTTACCCGAGATATTAAAAAAAATCATCGAAAAAGTTTCGATTTTCGCAAAAAAACGC  
GGTGATTTCGGAAGGTCATATCTCCGCGGGGAGTTATGTCGTTTTGGAACGTCATATCTCCGCGCGGAGTTA  
TGTCGTTTTTGAACGTCATATCTCCGCGCGGAGTTATGTCGTTTTGGAACGTCATATCTCCGCGCGGAGTT  
ATGTCGTTTTTGAACGTCATATCTCCGCGCGGAGTTATGTCGTTTTGGAACGTCATATCTCCGCGCGGAGT  
TATGTCGTTTTGGAACGTCATATCTCCGCGCGGAGTTATGTCGTTTCGGAACGTCATATCTCCGCGCGGAG  
CTATTACCCGAGATATTACAAAAAANAATCATCGAAAAAGTTTCGATTTTCGCACCGACCTCTATTTTGAAA  
AAAAACGTGATGTAACCCCTCGCCATTTTGTTCGATTTGGGTCAAAATTTTGGATTTTCCTTTTTTTTGATGCCA  
ATCGATAGAACTGATCCTTACGAGTCAAAAATGGTATAAAATTCCGAAATCGGACATTATTTGACGGAAA  
TATTCCAAAAAATCATCAAAAAGGTTGAATTTACGAACGAATCGGTTTTTTGTCAACAACATTTTTTCAACC  
CATCGATGATTGATTTGTTTGAATGCCAATTGATGGTAGGGATCCGTACGCATTCAAAAAGGTATAACATT  
TTAAAATCAGACATTATTTACCCGAGATATTAAAAAAAATCATCGAAAAAGTTTCGATTTTCGAAACCTCG  
ATTTTCGCGAAAAAACGTGCGTATTGGAAGGTCATATCTCCGCGNGGAGTTATGTCGTTTTGGAACGTCAT  
TATCTCCGCGCGGAGTTATGTCGTTTCGGAACGTCATATCTCCGCGCGGAGTTATGTCGTTTTGGAACGTC

ATATCTCCGCGCGGAGTTATGTCGTTTTCGGAACGTCATATCTCCGCGCGGAGTTATGTCGTTTTCGGAACGT  
CATATCTCCGCGCGGAGNTATGNCGTTTTGGAACGTCATATCTCCGCGCGGAGTTATGTCGTTTTGGAACG  
TCATATCTCCGCGCGGAGTTATGTCGTTTTGGAACGTCATATCTCCGCGCGGAGTTATGTCGTTTTGGAAC  
GTCATATCTCCGCGCGGAGTTATGTCGTTTTGGAACGTCATATCTCCGCGCGGAGTTATGTCGTTTTGGAAC  
CGTCATATCTCCGCGCGGAGCTATTACTCGAGATATNAAAAAAAAAATCATCGAAAAAGTTTCGATTTTCG  
CACCGACCCATTTTGAAAAAAAGCGTGATGTAACCCCTTGCCATTTTGTTCGATTTGGGTCAAAAATTTTGGA  
TTTCCTTTTTTTGATGCCAATCGNTAGAACTGATCCTTACGAGTCAAAAATGGCATAAAAATTCCAAAATCG  
GACATTATTTGACGGAAATATTGCAAAAAATCATCAAAAAGGTTGANTTTACGAACGAATCGGTTTTTTGT  
CAACAACATTTTTCAACCCATCGANGATTAATTTGTTTGAATGCCAATTGATGGTAGGGATCCGTACGCAT  
TCAAAAAGGTATAACATTTTAAAATCAGACATTATTTACCCGAGATATTAAAAAAAAAAATCATCGAAAAAG  
TTTCGATTTTTCGCACCGACCTCGATTTTGAGAAAAACGTGGTGATTTGGAAGGTCATATCTCCGCGNGGAG  
TTATGTCGTTTTTGAACGTCATATCTCCGCGCGGAGTTATGTCGTTTTGGAACGTCATATCTCCGCGCGGA  
GTTATGTCGTTTTTGAACGTCATATCTCCGCGCGGAGCTATGCCGTTTCGGAACGTCATATCTCCGCGCGG  
AGTTATGTCGTTTCGGAACGTCATATCTCCGCGCGGAGTTATGTCGTTTCGGAACGTCATATCTCCGCGCG  
GAGTTATGTCGTTTCGGAACGTCATATCTCCGCGCGGAGTTATGTCGTTTTGGAACGTCATATCTCCGCGC  
GGAGTTATGTCGTTTTTGAACGTCATATCTCCGCGCGGAGTTATGTCGTTTTGGAACGTCATATCTCCGCG  
CGGAGCTATTACCCGAGATATNAAAAAAAAAATCATCGAAAAAGTTTCGATTTTCGCACCGACCTCGATTT  
TGAAAAAAAGCGTGATGTAACCCCTTGCCATTTTGTTCGATTTGGGTCAAAAATTTGGATTTCTTTTTTTGA  
TGCCAATCGATAGAACTGATCCTTACGAGTCAAAAATGGTATAAAATTCCNAAATCGGACATTATTTGAC  
GGAAATATTCCAAAANATCATCAAAAAGGTTGANTTTACGAACGAATCGGTTTTTTGTCAACAACATTTTT  
CAACCCATCGATGATTAATTTGTTTGAATGCCAATTGATGGTAGGGATCCGTACGCATTCAAAAAGGTATA  
ACATTTTAAAATCAGACATTATTTACCCGAGATATTAAAAAAAAAAATCATCGAAAAAGTTTCGATTTTCGCA  
CCGACCTCGATTTTCGAAAAAACGTGGCGATTTGGAAGGTCATATCTCCGCGNGGAGTTATGTCGTTTTGGA  
ACGTCATATCTCCGCGCGGAGTTATGTCGTTTTGGAACGTCATATCTCCGCGCGGAGTTATGTCGTTTTGG  
AACGTCATATCTCCGCGGGAGNNATGTCGTTTTGGAACGTCATATCTCCGCGCGGAGTTATGTCGTTTTGG  
AACGTCATATCTCCGCGNGGAGTTATGTCGTTTTGGAACGTCATATCTCCGCGCGGAGTTATGTCGTTTTG  
GAACGTCATATCTCCGCGCGGAGTTATGTCGTTTTGGAACGTCATATCTCCGCGCGGAGTTATGTCGTTTT  
GGAACGTCATATCTCCGCGCGGAGTTATGTCGTTTTGGAACGTCATATCTCCGCGCGGAGTTATGTCGTTT  
TGGAACGTCATATCTCCGCGCGGAGCTATTACCCGAGATATNAAAAAGAAATCATCGAAAAAGTTTCGAT  
TTTCGCACCGACCTCNATTTTGAAAAAAAGCGTGATGTAACCCCTTGCCATTTTGTTCGATTTGGGTCAAAA  
TTTTGGATTTCTTTTTTTGATGCCAATCGATAGAACTGATCCTTACGAGTCAAAAATGGTATAAAATTCC  
AAAATCGGACATTATTTGACGGAAATATTCCAAAAAATCATCAAAAAGGTTGAATTTACGAACGAATCGG  
TTTTTTGTCAACAACATTTTTCAACCCATCGATGATTAATTTGTTTGAATGCCAATTGATGGTAGGGATCCG  
TACGCATTCAAAAAGGTATAACATTTTAAAATCAGACATTATTTACCCGAGATATTAAAAAAAAAAATCATC  
GAAAAAGTTTCGATTTTCGCGAAAAAACGTGGCGATTTGGAAGGTCATATCTCCGCGCGGAGTTATGTCG  
TTTTGGAACGTCATATCTCCGCGCGGAGTTATGTCGTTTTGGAACGTCATATCTCCGCGCGGAGTTATGTC  
GTTTTGGAACGTCATATCTCCGCGCGGAGTTATGTCGTTTTGGAACGTCATATCTCCGCGCGGAGTTATGT  
CGTTTTGGAACGTCATATCTCCGCGCGGAGTTATGTCGTTTTGGAACGTCATATCTCCGCGCGGAGTTATG  
TCGTTTTGGAACGTCATATCTCCGCGCGGAGTTATGTCGTTTTGGAACGTCATATCTCCGCGCGGAGTTAT  
GTCGTTTTGGAACGTCATATCTCCGCGCGGAGTTATGTCGTTTTGGAACGTCATATCTCCGCGCGGAGTTA  
TGTCGTTTTGGAACGTCATATCTCCGCGCGGAGTTATGTCGTTTTGGAACGTCATATCTCCGCGCGGAGTT  
ATGTCGTTTTGGAACGTCATATCTCCGCGCGGAGTTATGTCGTTTTGGAACGTCATATCTCCGCGCGGAGC  
TATTACCCGAGATATTAAAAAAAAAAATCATCGAAAAAGTTTCGATTTTCGCACCGACCTCATTTTGAAAA  
AACGTGATGTACCCCATTTTGTTCGATTTGGGTCAAAAATTTGGATTTCTTTTTTTGATGCCAATCGATA  
GAACTGATCCTTACGAGTCAAAAATGGTATAAAATTCCNAAATCGGACATTATTTGACGGAAATATTCCA  
AAANATCATCAAAAAGGTTGACTTTACGAACNAATCGGTTTTTTGTGNACAACATTTTTTNAACCCATCGAT  
GATTNATTTNTTTGAATGCCAATTGATGGTAGGGATCCGTACGCATTCAAAAAGGTATAACATTTTAAAAT  
CAGACATTATTTACCCGAGATTATTAAAAAAAAAAATCATCGAAAAAGTNTCGATTTTCGAAAAAAACGTGG  
TGATTTGGAAGGTCATATCTCCGCGCGGAGTTATGTCGTTTTGGAACGTCATATCTCCGCGCGGAGTTATG  
TCGTTTTGGAACGTCATATCTCCGCGCGGAGCTATGTCGTTTTGGAACGTCATATCTCCGCGCGGAGNTAT  
TACAAAAAACATCGAAAAAGTTTCGATTTTCGCACCGATCTCATTTAAAAAACGTGATTACCTCCATTTT  
GTCGATTTGGGTCAAAAATTTGGATTTCTTTTTTTGATGCCAATCGATAGAACTGATCCTTACGAGTCAA  
AAATGGTATAAAATTCCTAATCGGACATTATTTGACGGAAATATTCCAAAATATCATCAAAAAGGTTGA  
CTTTACGAACATAATGGTTTTTTTTGTTCGANCATTTTNAACCCATCGATGATTGATTTCTTTGAATGCCAATT

GATGGTANNNNNNNNNNTATTACTATTTTAGGGNCAACATATCATGTTTCGTGACTCTA  
>160\_rnd-5\_family-470\_\_LTR\_\_Gypsy  
ATATAAGTTAACAAACAATAAATTCATACAGTCCCAATAAGAAGCATTGCAACACCTCATAAGAAGTGCA  
GCAAAATGCTGACTTGGTGTCTGTGCCATTTCTCCACGCGCCGACTGGCAACCGCCGAAAATTCCAAGA  
AGAATTGCCCAACGGGGCCAACAACATCAGCAGCGACGCCGCTGCCAACGCCGCTGCCGCTAAGCCACAG  
GTTACTAGGGGCTAGAATTGATTTAAGTTTATTCAGTTGCAAATTAACATCAAATAAAGGAAGTCTTGCTTC  
CCTAAAAATTATATTTTTTTCATCGTTTAATAAACTTTGGAATTAAGTGGCGCCCGAGCAGGGACCGGCTC  
GTGTTACAACAGAACAAAACGCTTCTACGTACGCGTTAGTCGGTTATACGCGAAAATAAAACCAGTGCAA  
CTCTCGTCGATTAAATTCAACGATCGGTTAAATTCGCGAAAGGCAATTGGAACCTAATTGTTCAATTTTGC  
CCATCGGTGGACAACGCATCTTGTAAGGCCCGCCCGCAGGATACTCTCAACAAAGACTGGTCGCAGGATC  
CCCAGTAGATACCCAAAGGCTTCAAAAAGGATGAAATCCGGACCGGCAGGGGAGGTTGCCACATCAGGA  
ATAGTACTGTAAGTTAGAAAATTAAGTGAAACAANAAAAAAAAACAAACGAACAACCTGAAATAGAAGTTA  
TAAGAATAATAAATACTAAAAATTGTAGAACGATAAGCAAGATAAAAAAGTGTA AACGATCAACAAAT  
ATAAAGACTACGAACGTAGTATAAATTATTTCCAACCTTTGCGACTCCCAAGGGACCCCTCCAAAGTAGAAG  
GAAGAAACCAGCCACTGGTTTTAAAAAGAAAACAAAACGATCAAAAATTCAAGTAAAATATAGAGTAAA  
AAACTAACACTAGATTTAAATATACTTCGAAAATATCTTAAATATACAATATAAGTAATATATCTCGTTT  
ATGGCTAATGAAAGCAATTTAGTTAGGCCCCCAATAGTATCAGATCAACCACAGGTAGGCGGACATAACT  
CGAACAGACAGCAACAACGACATATCGACAGACAAAACGAACATTTACAAAATAGAGTCATGGCGAATA  
ACGCAGAACAGATAATAGCAGCCACGGTTAGCCAGATTTTGGCACAACAACCTGCCGACATTGGTAAAGCA  
GTTAGTCAACCCCTCTAGGGAGTTTAGTGACGTAGACGACCAACAATAACTGCCAACCACAATTTGAAT  
GACTTAGACAGAGTTCCGGACATAGTTAAAAGCCTCAGAGAATTCTCCGGTAATCCAGCAGAATTTAGCT  
CATGGAAGAAGAGTG TAGATCGTATACTCTCAGCCTATGCAGCTGAGGCAGGTTCCGCCAAAATACTTTGG  
CATATTGCATACAGTGAGAAACAAAATCACTGGCAATGCCGACACGGCCCTCGAGTCGTATAATGTTCCC  
CTAAATTGGAGCGCTATCTCCAAATGTCTCACGCTGCACTACGCAGACAAAAGAGATCTGGGAACATTAG  
AATATCAGATGACAATGTTAGTGCAAGGTAACAACCAACAGTAGAAGAATTTTACCAGGTCGTTTACAA  
CCACTTGTCGCTGATATTAATAAAGTAGGCTGCATGGAATTAATAGGGAATCCGAAACCCTTATGACA  
AAAATATACCGAGATAAAGCATTAGATACCTTCATTAGAGGTTTGAAGGGAGATTTACCACGGATTCTTG  
GAATAAAGGAGCCAGCAGATCTACCTTCAGCCCTTCACTATTGTTTTAAACTAGAGAATCAAAGCTATCG  
CACTAACATGGCTTTGAATAGAAATCAACAGACACATGCCAGAAACCCAAATAGAAATATACCACCACCT  
ACACTGCCACCTCGAACAGCTCAGCCTTATTTTCGCTCAAACCTTTTAGGGCCACCACCCATTAGCTTCAGGCC  
CCAACCTCCCGATCCATACACCTTGGCCAACCAATACAAACCATGGACCACCGACTTACAACAATAATGGA  
CCGATTCCACAATATCCCAACCAACGAACCTACCAGACACAACCACAACAGGTATACATACCCAATAGAC  
CTTCTGCACCAAAAACCCCAACCACGTCTTGAGCCAATGGACGTGGACCAAAAGCATCCGCACGAGGATGAT  
AAACTACATGAACAGACCCAATTTTGAAGTAGGGAAAAGACCTCCACCACCAACAAACGCCACGGACAA  
AAAACAAAGAAATTTCAACATACAAACAGGAGAAGAACAGACGGAGACAGAAAACACCGACAACCTATG  
TGACTATGGAGGAATACGTACAATCAATGCTAAATTACGAACAGCAGACTGAATACGAACAGCCATTAAA  
CGAATACGCCCAACAAATTGAAGAAACAGATGACGGACAAAATACCCAATACGAACACTCAGACATTAA  
TTTTTTAGGATAAAGAGCTCCTCTCTTCCTTACATAGAATGTAAGATGGGGAGCGGAAAATTACTCAAAAT  
ACTAATAGATACAGGATCAAACCGAAATTACGTCCAACCAAAATTCGTGTCCGAGCCTATTCCAAACGAA  
AAACCCTTTGAAGCCGTCACAGTCGGCGGAAGCATTAAATTAACACACCACAAGTTCGCTAATCTTTTTAA  
TAGAAACGATATAAAAAATAAAATTCCTTCTTACCCACCCTAAAATCATTGTGACGCCATATTAGGTAACG  
ATAGTCTAAAGGAAGTATGCTGTGATACAAAGCAGCAAGAATCTACTAATAATCAAGAACAACATTTG  
CATACCCATTAAAGCAGAAAAAAATAGAGGCGGTCAACACGGTAATACCACGGACAGAACATATGACAAA  
CGAACAAAAAAATAGCCTTAATCAACTAGTTAAATGCACCCACACCTATTTGCCAATCCGGACGAAAAA  
CTGACATACACAACCAACGTCAGAGCAGAGATTCGAACAAAAAACGACTCCCCCATATATTCAAAATTTT  
ACCAATTTCCAATGTCTTTAAAAGACGAAGTACACAGCCAAATCAAAGAACTTTTAGAGGACGGAATCAT  
CCGACCCTCCCGATCCCGGTACAATTCACCTGTGTGGATTGTTCCGAAAAAATTAGATGCCTCCGGGGCAA  
AGAAATATCGCATGGTTATAGACTACAGGAACTAAATAAAGAACTACCGCAGACAAATACCCTATACC  
CGAAATCAACGAGGTACTAGCACAGCTAGGCAATAACAAAGTTTTCTCTGTCTTAGATTTGAAAAGTGGC  
TTTCATCAAATACCCCTTAAGGAGTCAGACATAGAAAAAACTGCCTTCTCCGTTAACAACGGAAAAATACG  
AGTTTACACGACTCCCATTTCGGTCTCAAGAATGCGCCCTCAATTTTCCAGAGAGCTCTTGACGACATCCTT  
CGTGAGCATATTGGAAAAATATGCTTCATTTATATTGACGATATCATTATCTTTAGCAAAGATGATGAATC  
GCATGCGCAGCACCTCGCCGCCATATTCAGAACTCTACAAGAAGCCAACATGAAATGTCAGTTGGACAAA  
TGCGAGTTCTTTAAAAGCAGAGTAGAATTCCTGGGATTTGTCATCTCAGACAAGGGGATAGAACTAATC

CAAACAAAATTGAGACAATAAGAAAGTACCCACTTCCAAAAACACTCAAAGATTTAAGATCGTTTATTGG  
CCTTGCCAGCTATTATAGGAGGTTTATAAAAGACTTCGCTAAGCTGGCAAAGCCCCTAACCTCTCTTTTAA  
GAGGGGAAGATGGACGCGTGTCCAAAAATCAATCAGCTAAAAAGCTCATTAATCTCAACGAAGAAGCGA  
TCGAAGCATTCAATAAAATAAAAAATTCCTAGTTTCGAATGAGGTAATACTTCATTACCCAGACTTCAGC  
AAAGAATTTTCATCTGACAACAGATGCATCCAACCTTTGCTATTGGGGCTGTCCTATCCCAGAACAAGCGAC  
CCATTTGTTTCTCTCTAGAACTCTCTCTAAAACAGAGGAGAAGTACGCCACCAATGAAAGGGGAAATGTT  
GGCAATAATTTGGGCCTTAAAAGCCCTCAAGAATTACCTCTACGGTAAAGCGAGTGTA AAAAATATACACC  
GACCATCAACCCTTAACCCACTCTCTTAGCAGTTGGAACGGCAACGCTAGGATAAAGAGGTGGAAAGCTT  
ACCTAGAAGAGTTTGATTACGAACCTCTCTATAAGCCAGGTAGGGATAACATTGTAGCCGATGCGCTATC  
ACGTATCCCTGTGATCAATAATATTGGATCAGTAGCCTCCACCCAGCACAGTGCAGACAGTTCAAGCCAC  
AACTTAATTCCGAGCATAGAAGCTCCAATTAACGTATTCAAAAACCAGATATTTCTCAGTAGAGCCAACG  
AAACAAATTACGAATTCCATATCCCATTCCCAACATTCCACAGGCATACAATTACTCGACCAAATTTCTCA  
GAACACGACCTTACGCAAATACTGAAAGCTCATCTAAACCCATCCGTAATCAACGGAATAATAACTTCAG  
AAGAAATAATGAACCAAATTCAGCAGATATATCCCCAACATTTTAGGAACTTCAAGATTAGATTACACA  
GTCTCAAGTAAAAGATTTAACAATGAAACAGAACAAAGATGAGAAGATATTGGTTACGCACAACAGAGC  
CCACCGCAACGCACTAGAAAACAAAATGCAATTGTCCGAAAGATTCTATTTCCCAAAAATGAAGCAACGA  
ATAACAGAATTAGTCAAACAGTGTGAGGTTTGTAAGAAGAAAAATACGATAGGCATCCCACTAACCCAA  
AACTCAAAGAAACACCAATCCCCGAATACCCAGGACATACAATCCACATCGACATATACACGACAGAAA  
AAAACCTTAGTACTAACAGCAGTAGACAAATTCTCGAAATTAGCTCAGGGACGAATTATCAAATCTAGGGC  
AATAGAAGACATTAAAAAACCACTTCATGAAATCCTTTTTTTATTTTGGCGTACCTAAAGTAGTTGTAATAG  
ATAACGAAAAATCCCTTAATTCAGCCTCAATCACTTTCATGATGCAGGACCAATTAATATAGAAGTTTAT  
AAAACACCACCCTACAAAAGCGCAGTGAACGGTCAGGTAGAACGATTTTCATTCAACACTATCAGACATAA  
TGAGATGCAACAAAAGAAAACAGGAATACAGAACATTCGAAGAACTACTCAACAAATCAATATACGACT  
ACAACACTACACTATACACTCGACAACATAACAAGAGACCATTAGACATATTCTTCGGCAGAAACGTGACTAC  
GGACCCAGACCAATACGAAAAAGCTAGGAAGGAGAACATTGACAGACTCAAACAGAAACAATCGACCGA  
CATGCAGAATCATAACAAAAAACGTAACGACATACGAACCTTACATACCTGGTCAAGAAATATTCGTCAA  
GTCAATACCAGATTAGGTACCAAACCTGTCACCCAGATACAAAAAGGAAATAGTTAAAGAAAATAGAAAC  
ACAACCGTACTAACAACAACTGACAAAATAATACATAAAAGCAATATAAAAAATACATAAAAAATTACAG  
ATTCCTATTAATGGATGACAATAAAAGCAACAGAAGGACACTTGGAAATTTTGAACCTACACAGACGCACA  
AACAAATTACAATTCTAAAAGGAATAGGGAACTACAGACATCGACAACACGAATCGTACAAGTCATAGA  
GCTAGAACAGATTAAAAACGCATTAGATAATCTCCTTTTTTACACCGAAAAAGACTTAACAACCAATACT  
TTATACCACACTTTACGTCACGAAATAACGCAAGCTATTGTCACTTTCGACACAATATCACTTTTCCATAA  
ACGAAAGACTAGAGCGATCAACATTATAGGCACAGCTTGGAAGTATGTAGCCGGCAGCCCGGACAATGA  
CGACTTAATAATGCTTACTGACAACATAAACAACTTATAGAAAACGACAATAAACAGCTTATCATAAAC  
AGGCAATTAGAAGATCGAATTAATAAACTCACGAAAATCTCAAACGATTTAACCAATAGCATAAGAAAG  
GAATCTCTCATAAGTGATGAGATAGCTATTAGCTTACAAAATCAAATTAGGCTCATAAAGAAGAAATAA  
TTAATATTAAGTACGCCATACAATGGGCGAAATTGAATTTAATAAATACATTCCCTACTTGGCGAAAAAGA  
AATAGAGATAGTAAACGATAACTTTAATAAAAGCAACATGCCACCTTTAATATTGAAGAAATGCTAGAA  
TTCGCAGATGTATCCATTTTGCATAATGGAACCACTCTGTTTTATATTGTAAAAATTCCAAATTTAGAAGA  
AATAGAATGCAAAAATACTATAATAAAGCCAGTAGTGAAAAACAACAATATAATAAATTTAGAATTTAAC  
GAACTGTTTCATTGTAATAAAACAATCTATGGCATAAACAACAATTGTAAAAGATACCATAATATTA  
TTTGTAACAAATCAAAAATTGTAACTTGAACAATAATAATTGTATACCTAAGTTAGTTAGCGGAGAGCA  
AGCGCTCTGTGGCTTTAGCAATGCAGATCATATCCCGGAGATCGAGGAAATCGACGAGGGACTTATACTA  
GTGAACGACTTCAACGGCACTATTAGATGGCAAGAAGAGAAGAAACGCGTGAGAGGCACCTACATGATT  
AACTTCTGGAACGAAACCTTATTCATCAACAAACAAGAGTTCAGCAACCTAGAGGTCACCGTCATCAACA  
AACAAAGAGTTCAGCAACCTAGAGGTCACCGTCATCAACAAACAAGAGTTCAGCAACCTAGAGGTCACCGT  
CATGACCCCGAGGAAATCCCACAATACAAATAACCCCAATAGAAAACGAAAGAATAAAGATTCTTTCTCTG  
GAAGCATTAGAAGAATTGCACATCAACAACATNAAAAACATGCAAAAACCTTCAGACGCACTCTATAGCA  
AATAGAGTCGGTTTCATAACTCTGTTTCACAGTTGCCATCCTTCTTACCTGTGTATTACACGTAATGAAGAA  
AAATAAGAAAAATATAATACTGCAACTGAACAAAGAACAAGAGAGACCCAAAAAAGAACCAGCACATAT  
CCAAATACAAAATACAGATGCCAACAACTCAGGTTCAACAACATACCTTTCTTCTGATGATCGCTTGAG  
GACAAGCTTAAATCAAAGGGGGGAAGAGTTAACAACAAATAAATTCATACAGTCCCAATAAGAAGCATTG  
CAACACCTCATAAGAAGTGCAGCAAAATGCTGACTTGGTGTCTGTGCCATTTCCCTCCACGCGCCGACTGGC  
AACCGCCGAAAATTCCAAGAAGAATTGCCCAACGGGCCAACAAACATCAGCAGCGACGCCGCTGCCAACG



CCGCTGCCGCTAAGCCACAGGTTACTAGGGCTAGAATTGATTTAAGTTTATTCAGTTGCAAATTAACATCA  
AATAAAGGAAGTCTTGCTTCCCTAAAAATTATATTTTTTTCATCGTTTAATAAACTTTGGAATTAACCTATA  
CA  
>160\_rnd-6\_family-2343\_\_LTR\_\_Gypsy  
ATATATAAGTTAACACTTAAGAATTGCACCAAAATAACGCTGTATAAGAACTTGCACAATACTTATATT  
GACCCATTTACGACCAAGCACATTCCGCTGACACATGAGTTCAGCGGCCTGACCGCAACGGTCAGCGGCG  
GTAACCTGACACTTGACTATGCTGCAAGTTTCCGCGTTGTCTGCTTATGCTGAGTCGGCTTGCCGACCGTAG  
CTTTGTAGTTTATAGATCCAAGTTTTAGGTATAATTCCAATTCAATTTTATACCACAATTCAGTTTTGTATT  
TGACGTTTAAGAATAAACTTGCACTACTCCGGCACGCTGCCGTAAATATCATTTGTTATATATTACAAAAA  
CATTGCTGAGCCACAAGGCCAGTAATTAGCAAAGAGAGTGAAGTCAAACCTCTCCACCATAATCGTCCTAA  
ATATCACTGGACTAGGCATCGCTGGACGAGAGACGGATCAACTATCGCATCGCTGGACCAGCAGATCGAT  
ATAATTGGCGCCCAACTCGTGGTAATAACGAAAGAAAATTACCCACGCGAGCGTTCGTTAATAAACTGAAA  
CACGCTAACAAATACATTACGTGATTGCTGACCTGCGTCAATACAGGCAGCAACAGTGCAACAACCTTCGC  
CCTCGTAAAGACACATTGGCAGAAGTGCACCGAGGCCACTGAAGCTATCTGGACAGCGAAGACTGCGGC  
GTTGGAGCTTAATTCCCCTTTAGTAGTTGTCTTAGAATCATGTAAGTGGGCTTTTCCTTAACCTCTTTTCAAG  
TCAATTCAAAAGAAATTTAAAAAAAAGGCACATTATTTTTGCATTACCTATTACTCGATTATAAATCTAT  
AAAGAAAAATAATAATAAAGTTATACGGCATTGAGAGCTTTGATTGATAGATAAGCTAGATATTTGTC  
ACTTGTATTTAAAGCAAATTGCAAGAACGCATATTTTGTCTGGCTTGCTTCCCCTCTATTTCGTTAGTTGTCT  
TTACGTAACCTTTGTAGTTAAACGCTCTGGCGTAACATGACACGCCAGCGTAGAGGAACTCACGCTTAATC  
ATCAAAATATTGAATTGTTTATCTGTAGCGAAGGCATATGAGCTCTTCATTCTCACAAATACAGAACGCCCC  
GCCACCGTTCNAGCGACTCAGANTCCGACTGTGACACTCAGGCACCNATTCGCGGACACAAGACTGGNN  
CCCGCNGTTCCCCCAGCGCCTAGCAACATGGACGCNGANCAGCTCAGGGCAATAGTGCGGACGGCCATCN  
CCAGCGCCTTAGCCGAGCAGGCCGCTGCAAACCAGCAGAGGGAGCAAGNGTTGACTCAAAGAATTAACG  
AGNTGNCTGAACAGATAGCGGCNGCGCGCTTGCCGCCCCACAAGTGCNAGCGTATGCGGCCATNGGAA  
TNAGNAACGAGATACGCTGCGACGAGCCGCTAGACGCCGTCAAATGCTTGCCCGAGTTTGCNGGAGCACA  
GGAATCTTATGTGTCGTGGCGGCAGGCAGCGCTGGCAGCCTACCAGATCTTCAGACCACATAATGGCAGT  
TCACGCCACTATCAGGCGGTTATCATCATCAGAAGCAAGGTCAGGGGCCCCGCNGACGCGGTGCTGGCCT  
CGTTTGGCACAGTATTGAACCTTTGATGCGATNATAAATCGCCTCGATTTACGTACAGTGACAAGCGACCC  
ATCCATGTNATNGAACAGGAGTTAGGCACCTTGAGGCAGGGGGGCTGTCGCTGCTTCAGTATTACGACG  
AAGTAGAGAAGAACTGACTCTNCTACCAACAAGGTTAACATGTCATATGAGCCGGCTTTGGCAAAGGG  
CCTATGCGAAAAATTCCGCGACGACGCGTTGCGCGTGTTTCATATCGGGTCTCAAACGCAGCCTCACAGAC  
GTGCTCTTCGCGGCTAAGCCAAAGGACTTGCCCTCGGCGCTAGCCCTCGCGCAGGAGGTGAGTCNAACC  
ATGAGAGGTACGCCTTCGCGGCTAACTNCGCNAGAAGCCNGGAGGAAAAAGAGCGCAGGCCGAGCGCNA  
AAGCGCAGAGTAGCCAGCAGGGGGAGCATTCCCGCCGCACAGTCAAGCGGACAGAAGAACCCGCACTNC  
AGCAAGCAGGCCAGGACGCAANGCCAGACCGACCAACGGAGCGGCAGGCAGCAGAATAACAATACGGC  
ACCGGTGCCCATGGAGGTCGACCCTTCCNTNTCGAGGGTNTGTCAGCCCNENCAGGCCCCNGCTTACGCG  
AACAGGGAGCANCCCGCATCTGACCGCACAGGCGGTGAGAGAAATCAGCAGAGGTTGAACCACGTGCGG  
CAGGGCGCGGGACAGGGGGCAGAGGCGTATGCCGATGCCGCTCCAGCGCGGGCGGCGCAAATCGACGAC  
GATGCCGTTATGACTCTGATGCCCTCAATTTTTTAGGAGCAAGTCCCTGCTACCCGTCATCAGACGAAGA  
GTAGCGGGGACTCACATGCGATTCTCATAGACACGGGCGCGGCCAAGAATTTTCATTTCGGCCACATGAAG  
GGTTAAAGGNCGTCCGCCCCGTTGACAAGAGTCCCCCTTCAAATTCATTCCATTACGGCGAGACACAA  
ATTACACACAAATGCTTTGTTTCGATGTTTCGGGNCAAAGGCNACCTTCTTTATTCTGCCGGACTTGTCAAC  
TTTTGATGGGATCGTAGGCCTTGACCTGCTAACGCAGGCAGCNGCCTCGCTTTGCCTAGCTTCAGGACAAC  
TTAAGTGGGGTACGGAGGTGCAACAAATCACCTTCCACACGTGCGAAAACGTAAATTTACAAANGTAGA  
CTGTGCAGAGGCATCCCCATTAGCTAGAAGTTCTTTCTTGAAAATGCTAAAGACCAGACAAAAGGCCTTT  
GCAGACCCAGACGAGGCGTTGCCGTATAACACATCAGTCGTGGCTACCATTAGGACCACNGATGAGCAAC  
CGATCTATGCCAAGCTTTACCCATATCCAATGGGAGCAGCTGATTTTCGTTAATAAAGAAATCAAGGATCT  
GCTAAAAAATGATATAATTCAAAAGTCCGTCTCTCCCTACAATAACCCAATATGGGTTAGTAGACAAGAAG  
GGCACTGATGAAGCAGGCAATAGGAAAATGAGGTTGGTAATGGACTTTCGTAAACTTAACGAAAGAACC  
GTGCCTGACAAATACCCTATGCCAAATATATCAATGATATTGGGGAATTTGGGGAGAGCCAAATTCCTTTT  
AACATTAGACCTCAAGTCTGGTTATCACCAGATCATACTCGCTGAACGCGACCGTGAAAAAACCTCTTTCT  
CTGTGAACGGGGGGAAATACGAGTTCAAAAGACTCCCCTTTGGATTAAAGAATGCAGCAAGCATCTTCCA  
AAGAACCATCGACGACATACTGCGAGAGCAGATTGGCAAATCTTGCTATGTTTATGTGATGACGTAATC  
ATCTTTTCAGAAGATGAGGAATCCCACATTAAACACGTGGATTGGGTCTAAAAAGCTTACACGAAGCAA

ACATGAGGGTCTCCGTCGAAAAGTCACGTTTTTTTAAAGAAAAGCGTGAACTTTCTTGGTTTTCATAGTCACC  
AGCACTGGCGCCACGACGGATCCTGAAAAGGTTAGGGCAATACAGGAGTATCCAGAACCTAAAACACTG  
TTCGAGGTGAGATCATTCTAGGCCTCGCAAGTTATTACAGATGTTTCATTAGGGACTTCGCCGCAATAGC  
AAGACCCATCTCGAATATCTTGAGAAGGGTGAAAATGGAACAGTCAGTAAGCATAGGTCCAGAAATATA  
AAGGTTCAATTCTCTGAAGTGCAGCAAAGGGCGTTTCAGAAGTTGCGCGATATTTTGTTCATCCGAGAATGT  
AATGCTCAGGTACCCCGATTTTAAGAAGCCATTTCGATCTAACGACCGATGCTTCGGCTCACGGCATAGGT  
GCAGTTTTGTCTCAAGAGGGTTCGTCTATAACAATGATTTCAAGAACATTGAAGGACAGCGAGGTTAACT  
ATGCAACAAATGAGAGAGAGTTATTGGCCATCGTATGGTCACTTGCCAAGTTAAGGCACTATTTGTATGG  
GGTGAAAGACATTAATATCTTCACTGACCATCAACCCTTGACCTTCGCAGTTTCGGAATCCAATCCAAATG  
CGAAGATTAAAAGGTGGAAAGCGCGCATTGACGAGTCTAATGCACGTATCTTCTATAAACCTGGCAAGGA  
CAATCTGGTTGCGGATGCCTTGTCAAGACAGCAGCTCAACGCTGTAAATGAACAAGAAGTTGAGTCCTGC  
GCAGCAACGATCCACAGTGAGGTATCTCTACCAACACCATTGAGACAACAGACAAACCCTTGAATTGTT  
TTCAAAACCAAATAGTGCTAGAAGAGGGCGCGTTTCCCCTTAAAACGAAGTTTTATTCTTTTTTGAAATAAG  
AAACGCTACTTGATCAGCTATACTTGCATCGAATCGCTGCTAGACGAGCTCGAAGATGTAGTTTCACCCAA  
ATGCGTAAATGCTCTCCACTGTAATTTACACACGCTTGCAATGATACAAGATGCATTGGTTTCGAAGATACC  
CGGCCACAAAATTCTGGCACTGCAAAAATCGCGTAGTGGACGTATTTGCGGTTGGAGAAAGAAGGGAAA  
TCCTCACAGCCGAGCATAATAGGGCCCATAGGTCTGCACAGGAAAATATTAAGCAGGTACTCTCGGAGTA  
CTACTTTCCAAAGATGGCAAAAATAGCCAATGAAATAGTACAAAATTGCAAAACATGTGCTAGGGCTAAA  
TATGATAGACACCCCAAAAAACAAGAGCTTGGGGAGACACCGATCCCCTCACATGTAGGAGAGATGTTAC  
ACATAGACATTTTCTCCACTGACAGGAAATACTTTCTCACTTGCATCGACAAGTTCTCTAAGTTTGCTATTG  
TCCAACCGGTCCCCTTCAAGAACCATTGTGGATCTGAAGCCAGCTTTAATGCAACTAATGAATTTTTTTCCA  
AAAGCCAGATCCATTTACTGTGACAATGAACCGTCATTGAATTCAGAGACCATCGTGACTNTGCTCGCAA  
ACAATATGGGGTCAGCATTTCAAATGCACCACCATTGCATAGCATCTCGAATGGACAGGTTGAGCGCTT  
TCACAGCACTCTGTTAGAATAAGCCAGATGCCTAAAGATCGATAAAGGCATAAGTGACACCGTAGAAGTC  
ATTTTACTGGCTACAATAAATAAGTCGATCCATTCGGTCATCGACNAGAGACCAGTCGACGTGG  
TTCAGGCGCACCCAGACGAGCCACAAGAGAANATACAAGANAGGATCAGAGACGCCCAGACGGCGCTCA  
GAGCTAGGGAGAACGCNAANCGGCAGAATAGGGTCTTCGACGTTGGTGACAAAGTTTTGGTCAAGTCCA  
ACCGAAGGCTCGGGAACAACTCACACCTTTATGTGATGAGAAGGCCGTNGAAGCAGACCTGGGGACCG  
AGGTCCTCATTAGAGGGAGGGTGGTCCACAAGGACAACCTGAGGTGATCACCACGAGAATAAGGCCCTT  
GAATTTTTTCTTACANCTTACCAATCTGTTTAGCCGCTTGGCATAAGCTTCTTCCAATTAATTATAAGACTTA  
GATATTAGCGTGTGCCCTCAGTTTAAAGTTCTGGTGGTGGTGGGTTAAACAATATTA AAAACACAAAAATAG  
CTAAAATTCCCATTCACAGGTTTGGACTNATTCTCATCTTGTCCCTGTCCCTGGCTTCGGCGCGCGTCACC  
GATTACTCAAACGCCAGGTACATCCCNATNGTGGACGGNCGAATCCTGGTGTGGGAGGANTTCGCCTACG  
TTAGGCACTCGGCGAATCTTTCAGAGTACGCGCGNGTGGTGGAGGAAACGGTCGGNTTGCTTGACATGTT  
CCCGCAATCTCACATGAAGAAGCTCCTAAGNGTGGACGCGGCTCACCTGCAGGACCTGCTGGAAGCGTTG  
GGCGTACACCATAGGGTGGCTAGAAGTTTGGATTTCCTAGGGTCCATGCTGAAAGTAGTAGCGGGACACC  
CGATGCCAGCGATTTAGAAAGANTAAGATTCACTGAACGACAATAATAATGAAAACAATAGACAAAT  
AGAGATNAACNCNAAAGTNCAAGACCAAGTTAATAAGCTNACAATCACTGTCAATCAAATTCTCAAGGCC  
GCGAAAAACACACAAGTAGACACTGGNCATTTATATGAAACGCTATTGGCTAGAAATAGAATGCTGATGA  
TGGAATTGCAAAATTTAATGCTTGCNATTACNCTTGCGAAAGCNAACATCGTAAGCCCGAACATTTTAGA  
CCACNCAGATTTGAAATCAGTTTGGCTNGAGGAACCCACCGACACTCCCATAGCAGANCTTATGTCCGTT  
GCGTCCGTNAAAGTACTACAATCNATTAACGCTNTACACTTTATNATTAAGTTCCCAAAAATTAAAATAGC  
TTGCAGAAAAATCACGATTTATCCCGTCGTCCACAAAGACGTAATATTGCGATGACAATGGCNGAGTGCG  
ATGGANACGTCCACGCNCTCGAGAATTGCGCCGCNTCGCCTGGAGCGACGTTTTTGCCGACTNTCANCGGA  
GAGCTCATGCGCCAGAGAGCTNCACGCCGGTGGCGCGGCNAACTGCGAAATCCAGCCGAGCAACCTGGA  
GCCAATCACCCGGGTGGACGACGGAATNCTNATCATCAACGACGGGCCCGCAAAAGTTTCGNGTTGACAA  
CGGCACTGAGACCCGGGTCCAAGGCACGCATCTCATCACGTTTCGNTGATCGGGCCGACGTNAACGGA  
CTGTTCTTNAATCGCAACAACGTCCGGAATAGAGTCCCGGGNATNGCGAANTCTCCCCTGCTGAACATCA  
CCGGCCAGCCGAGATGTNCTNAGTCTCCCNATACCTTCATCGNTTGAACGAACGTAATNTGGAGGCGATT  
ANCAGTTCAGGAAGTCAANGACGAAACCGGAAGCGCCGACCGAGCGTCGTGATAGCTTCTCGTTGGGAG  
CTATNTGTTGCGCNATAATTTGCGTCGGNCTACACTTCGGCGGATCACCAGAAGAGGAAGNCTGCAAGG  
CGGCTGAGAGAGGTGATCGCCGGGATAGGGTCGGCCGAGGACGGCCATTAACCTCGAAGGGGGAGCAGTT  
AACAGAGGCCAACGACACCAGCTCCAGATGCTGATATAGCACTGAGCCGGATGTTCTTACGAGCTAACAG  
GGGTCAGCAAAATGCAACATAACACCAGCCGAGATGCTGACATAGCTCTGGGCCGGATGTTCTTGCACG

ACGGCGGCGCACGAGGCGCAAGCTAAGCATTCTAGCGGCCGTTGTGAAAGCACACAATAGCTTAGGTATT  
TTTGATCAATCTTTTGTAAATTTAGTTTTTAATTTCGACTTTCTACTGCGGCACATCGGCCCAGCGACTTCGTG  
TATAATTTAACTCACTCACTACGGCGTGTCTGGCCTAGTGTTTTATAAATCATTATCAAAATAAAGTTCTAT  
CAAAATAATCCGCGAGGACTTATTATTTAAATCCTAATTTATA  
>9\_rnd-5\_family-541\_\_LINE\_\_R1  
CGGAAGAGGAGCACCTTGCTACTGGTGGGAATGAGCAAATCAGCGACCTAAGGAAGGTCTGCCTGCGTGCT  
AGAAGGCGCTCTCAGCGTCAGGAGAAGCATTAAACGAAGCAAATCCAGCTGTTCCAGAAAAAATGCGAT  
GAGGCCGATGTTACCGCGTGGGGCACGGCATAACAAGGTCGTCACGAAGAAGATCCGCAGCCAGGTGACC  
TGCCCTACCGCACTTGCCACTATAGTTGAGACACTGTTCCCCCAACACCCACGACTGGAAGTAGCCAACC  
GCTCACTGAGCACGGAGCTAGTGCAGCAGGTGTCTGGCAGACGACGTGTTAGCGGCAAGCAAAAAACTAG  
GCGACAAAAAGGCTCCAGGACCAGATGGGGTGCCAAACAAGGCGCTAAAGTTAGCAATGCTAACAAAAAC  
CCGACGCCTTCGCCGAGACATATACTAGATGTCTACAGGACGGTGTATTCTCTAAGAGATGGAAGCGACA  
GAAACTAATCCTTCTACCGAAAGGGGACAAGCCAATAGAGGAACCCTCGGGATACAGGCCAATCTGCCTA  
CTGGACACGGCGGGAAAGGTACTGGAAGGATTGTGTATGACCGACTACTTAGTGTCTCGTGAAGAGAAA  
GAGGCCCTGTCCAAACAGCAATACGGATTTTCGCAAGGCAAGGTCTACGGTCGATGCAATTAAGGCGGTGG  
TAGATATTGCCGCTAAAGCAATAGAGGGAACCAGATGGAGGTGGGGAGACAAGGAGTATTGCGCGGTGA  
TTACGTTGGACATCCGCAATGCCTTTAACTCAGCAAGCTGGTCNCGTATACTGGAAGCCTTAGACCGAATA  
GGGATACCGTCCCTCCNTTTTCCGTATAATATCCAACCTACCTGTCCGATCGGGTATTGAGTTATGATACGGA  
TGACGGTGCTAGGAGTTACACGGTCTCAGCAGGGGTCCCACAGGGGTTCGGTCTGGGACCACTCCTGTGG  
AACATAATGTACGACGAGGTGCTCAGAGTGCAATTGCCCCAGGGATGCAGAATCATAGGATTCGCGGATG  
ACCTAGCTCTAGTAGTGGTGGGCAAAGAAATAGAAGACGTGGAAGCGGCTGCGAATGCAGCCATAAGGA  
TCGTGGCCAGCTGGATGCGTGGCGCTAGCCTGGAGCTGGCAGGCCATAAAACAGAGGGCGGTCTCATCAC  
AAGCCGCAAAATAGTCGAGTTTGCTAGATTTTCAGGTAGACAGCGTTAGTATCGAGTCAAAGGCTTCCATT  
AAGTATCTGGGGGTGCTGTTAGACAACAGGCTTAGCTTTTCGACCGCACGTAGATTACGTTAGCCAGAAAG  
CAGCCAAAATGCAGGCGGCCCTTTTCGAGGATGCTACCCAACATAGGAGGACCTAAAGCAGGTAGACGCC  
TGCTCCTCGCGAGAGTTGTAGCCTCCGTGCTGCTCTATGCTGCACCGATATGGGCTTCAGCGGTTGCAAGC  
CAGAAAGGCCTCCGAAGGAAGATGTCAATCCCCTATAGGCTCAGTGCTCTGCGCACCATTCTGGATTCC  
GGACGGTGTCGGACGAGGCAGCCACAGTATTGGCAGGAATGCTGCCAGTAGATATATACTGGCCAAGGA  
AATGGAGAAAATTTACATGGCCCGAATAGCCACGGGAGACGCCGTCTCAATGGACGTCATCCGGTCGGAG  
AGAGCAACATCAATGGCAACTTTGGCAGGAGAGATGGAACACGGCGAACAAGGGGAGATGGACACATAA  
ACTGATCCCCAATCTGGAGCAATGGATTAGGAGACGGAATGGCGAAATGAACTTCCACCTAACACAGTTT  
TTCCTGACACGCGGGGTATAGGAAGTATCTCCATAGGTTTCAGGCATGAGGACTCTCCAGAGTGCCCGA  
ACTGCCCAAATCTGGACGAAGACCCGGAACACGTGCTGTACCAATGCTCGAGGTACAGAGAGGTAGTGG  
GCTCTGTACCTCCACCGGAGGGACTGGTAGCGTTCATGCTGGAAGGAGAGGACAAGTGGAGAAATATAA  
GCCAGCTCATAATAGGCATCCAGAGGGATCTGAGACGATGCGAAAAGGAGCGACGACTAATGGATACTG  
CCTAAAATAGGCAACCCATCCCCGCGAAGTAATACTTTGCGGTGATCCCGCGGGGAATGTGGTGTGTGAG  
TGGGGGGTGAGTTTAGTACGTAGGTGCTGACGGAGTCAGCAAATCGTGCATACGGTTGGCCCGGGCCATC  
AGTATCTTACGAAGATTTTCACCTCCGTGCCGTAAGCAAAAAAAAAACACACACACACGACTACGATCG  
TTTTCATAGAGTGCGGACGCGATTTGTAACTGCTCCGTGAAAATAAACAAATAAACCTGTGAAATTAAAG  
TGAAGTTAGTGACGTGTGCAGGGAACCGAGACAGGCCTAAGACACCAAAAGGTGCGTGGTGGTACTCA  
CTGCGAAGCCCGTGCAGACCATTCTGGGGTGGCGTCTACAGTTCCACGATCCAGGCGAGGGGAGTGGAG  
GCGTCTACTTGGCGTGTTTGTGCGCTTTTGTGAGTTTACCCTCAATTGTATTAGCCGTCTCGCAAAGCTA  
TTTGTGCAGTTGGTTGCATTCACTCTAACAGCTGTTAGTAGTGTGGCTAGCGCAGTTCACAACCAGCTGA  
TCTGCACTATAGAGCCAGCTGCCAAACTGCGTAGCGGAGATACCAACCAGGTGATAAGCTGTAACCTGGCA  
GAAAGTACAGCATACTTTCCGGGCTTACGCTGTTCTTGCTAAGCATTTAAGCTTTGGAGAAAGAACAGGCA  
AAGAAGCCGATATCGGTGCTCACTACAGGCTCCAGGGCAAAAAGGAGCAAAAGGTGCGGGAACAGACCA  
ATTTCCAACCCCCCGCCGCGGGTGGCCATAAAAACGGGGCTCTGGTGACCGAGTCGGAGCGGTATAAC  
TCCCAGCGGTTAATAGCCAGAGGGAAACCGTTGGCCACCGAGGGACTTTCCTGTAGAGCCCTGATAGTTA  
GAGCAGGTGCCCAGAGTGAAAAATGGAGGATGAGCTGCATGCCTTTGCGCGCCGCTCTGCACTACAGCGA  
TCACCGTCACACCAGGCGGTACGCCAGTGCAGCAAAGAGTGGCTGCGTCGTCGCCGGCAAAAGCGAGT  
GAGGAGCTGCCAAGAACGCTAAGAGGCACGATTGAGAAGATGGGCTTAGTCCTAAACGGCTTAACGGCG  
CTGTTCAACGGACAACGCCACATTAACGGGCTGATGCGAGAGGAACTCGCGAGAGTAGAAAGCCTGCAG  
AAGGTGGCGCTCAAGCTCTGTGCGCCGGAACGAAGTGCGACGAGGCGCAACGACGCCGTCATTAGCC  
AGACGTGCGGAGCCGAACGTGCTAAAGACGCGCCCAACGAAGCTCGGGGGCCAAAAGAGGCAAGCAC

GCCCCAACGGCCGAGGGATGGCGTGCCAGAGCAGCGCAGAACCCCCCTCCAAGAAGGCTAAACGCCAGGG  
TCAAAACCCAGCGAAGCAGGCGCTGCTCACGCATCAAAAGACAGCCCCTGCAAACCTCAACTTAGCTGGC  
CATAATGGCAACCCAGAGAGCTGGACAGCAGTGAACGGACGTAAGCGAACGCAGAAGCGTCCCAGAGCC  
GACGCCATTACAGTCCACGGAGTGGGTGACTGCACATATGCCGATATGCTCGGGCTCGTGAAGAGCGACC  
CGGCCCTCAAGCACCTAAGTGGCGATGTGCATGGCATTCGCAAGACCGCGAAGGGCGATCTTCTGCTGCG  
CCTCAATAGGAAGCCGGAGCACTCCGCAGATGAGCTTCAAGAAGCTGTGGGAAAGGCATTGGGTGACCG  
GGCGGTAGTAAGAACGCTGACCGAAACGTCCCAGGTGGAGATCAAGGACCTGGATGAGCTGGCGACTAA  
GGAGGAAGTGCTCGAAGCGATTAAAAGTGCCTTACAAGACGACTCCTTGCCGATTGAAACGATCAAATCG  
CTGCGACCAGCATTGCGGGCCAGCAAAGGGGCCACAGTTACTCTCCCAGCGCCAAAAGCCAGGACGCTTG  
TCGAGAAGGCCAAGGTGAGGATCGGATGGGTGTCTGCCGTATTCGTGCAATAGACCAACCAAAGCGATG  
CTTTAAATGCCAGGGTTTTGGGCACATTGCGGCGAACTGCACCAGCGGAGACGATATGAAAGGCGCATGC  
TTCAGATGCGGGGACACAGGTCACGAAGCAAAGAGCTGCTCCAAGCCACCAAAAATGTAGCCTTTGCATAC  
GGAAAGGAGAAAAATCAACGGACCACGCTACAGGAAGCTTTAAATGTCCGGCGTATCGCGAGGCAGTAC  
GCAAAATGAAATGTTAAGGTTACTCCAAATAAACCTTAACCACTGCATAGCTGCTCAAGCCATCTTGAG  
CAGACTGTTAGGGAGATGCGCATTGATATTGCCATTATCAGCGAACCCACCACCGAGAAACCAACTGCC  
CGAGAATATGGACCGAGGATCAGGATGGAAAAGCTGCGCTCTGGGTATGTGGCGACCCATCGACATCGCT  
GACAAAAACAAAGTCCTTCACTGGGTTTTGTACGCGCACAATACGGCAGCCTGTGGATATACAGCTGCTAC  
CTGGCCCCAAGCATGCAGCTCTGCGAATTTACAGCTGCATTAGATGCATTAGTAGATGACGCAAGGGGGC  
GGAAGGTCATTATTGCTGGTGACTTCAACGCCTGGGCAGTGGAATGGGGCAGCCAAGCAACTAACGCAAG  
AGGTCGTGCCCTGTTGGAAAGCTTCGCAGCCCTAGATATAGCCCTGCTAAACTTCGGGCTCGGAAAATACCT  
TCACTCGAGGTGGTATCGGATCCATAATCGATCTTACCTTCGCAAGCTCGTCACTTTTTAGCGCAACAAAA  
TGGCAACTAAGCGACTTATACACCGCAAGCGACCACTCCGCAATAATATGCACGATTGGTGAAGGAACTG  
CAGCCAGCACTAGAAGCCTAAGTCGGAAAGCTTACCGCCTGGATACTTTCGACCCCGTGCCCTTTTCGAAT  
GCAGTCCACTCGCTTGTCCTGCGGCAACGCAGAGAGAAGAGCCTCCCAAATGGCATGCCAGCTATCGC  
GTGCCTGTGACGAGAGCATGCAAACCCGGAAAACGTTTCGGCGCCACCATGTACCCACGTACTGGTGGA  
CGAAAATATTGCCGAAGCACGGCGGAACTGCATCCAAGCCAGGAGGAGATACCAGCGAGCCCGAGGTAG  
ACCAACTATGCCGAACAGCAGCTAAGGTATCAGAGTGCCAGAAAAATGCTAAAAAGTCCATAAGAGAT  
AGCAAACGAGAATGTTTCCTGGAGCTATGCGACTCAGCCGAATATGATCCTTGGGGCAAGGCGTACAAAA  
CTGTCTGTTAAAAGACTCTACGCCGGCAAACAAGCGCAGCCTTCTGACCCAAGTGAGCTGAAGTTGATTGT  
GGAAACGCTATTCCCAATCAGACCCGACGTATTACANACGCAAGCCATACCATCGAGCCACGTAGCAGCC  
ATGCCGTCTCTCATCGACGAAGTCTCAGTCGAAGAGGTGCTGACGATCGCCAGAAGCCTAAAGCCCAGTA  
AGGCACCGGGTCCGGACGGAATCCCCAACCGAGCACTGAAACTAGCCATGTCCTTGCGGCCCGCGCAGTT  
CGTGCAGCTTTTAAACATGTGCCTAATGGAGAGAACTTTCCCCACAATATGGAAACTCCAACGCTAGTTTT  
ATTACCGAAGCCTGGTAAGCCGCCCCGACGACCCATCGTCATACAGGCCGATTTGCCTCCTGGACACGTTA  
GGCAAAGTGCTGGAGAAGCTAATCTGCAACAGGCTTCAGGTAGCTGTGACAACAATGGTGGCCTGTCCC  
AAAGCCAATTTGGTTTTACCAAGGCAAAGTCTACAATAGACGCTCTGGAGAAAGTGGTCGGCATAGCAAC  
AAACGCCATCCAAGGATCGAGATGGAAAAGCGGCACAAAAAGTACTGCCTCATCGTCACGCTGGATGTTA  
AAAACGCCTTTAACACAGCCAGGTGGGACAAAATATTGGATGCATTGTCAACGTTCCGCGTCCCATATTA  
TCTTCAGGAGACGATACGCAGCTACTTCACTGGAAGACTGCTGCAATACGACACCGCAGACGGCCCCACT  
ACACATCAAGTGTCCGCTGGAGTGCCCCAAGGCTCAGTTCTAGGACCCCTCCTCTGGAACATCATGTACG  
ATGGCATCCTCCGACTGGAACCTCCCGATCGATACAAGTATCATCGGCTTCGCGGACGACGTGGCCCTTGTA  
GTCGTGCGCAAGGAATTGAAGGACGTAGAGGAATCGTGCAACCACAGTATTGACCGTGTGCACCAATGGC  
TGGCAGCAGCTGGACTCGAGCTGGCTGCTCACAAAACAGAAGCGGTGTTAGTCAGCAGTCGAAAAAGAG  
TGGAACAGCGCACATAAGAGTCGGCAGTGCGACAATAGAATCGGCAAGGGCGCTAAAGTACCTGGGTG  
TCATGCTAGACACAAGAATGTCGTTCAAAGAGCACTTGGAGTACGTGCACAAGAAAGCAGCAGAGTCCTG  
TCGAGCGCTATCCAGGATTATGCTGAACACACGGGGACCGAAACAGCAGAGACGCCGTCTCCTTATGACC  
GTAAACCGAGCGGTAATAATGTACGCGTCCCCATCTGGAGCAGAGCTATGGCTGTTCCAGCTACAGCCG  
GGGCGTACACTCTATATATCGCCTAAGCGCTCTACGGGTCAGCTGCGCATTCCGGACGGTATCGGACGAA  
GCGGCGCTGGTTATCGCAGGAATGGTCCCGCTAAGCGAACTGGCAACAGAAGCTGTAGTTTGCTATAGAG  
CCCACGATGGAAGCAACACAGCAAACCTCGACTCGCACTGAGGCAAGGATGCAGAGCGTAGCACGATGGC  
AAGCACGCTGGGATCGCGCATCTAAAGGACGCTGGACGCATAGGCTTATCCCAAACCTTGGAAGCCTGGAC  
AAATCGCAAGTATGGCAATACTAATTTTTATTTAACGCAGCTCCTATCAGGCCACGGATGCTTCAGGAGCT  
ACTTAAAGCGATTCGGCCACGACAACACAGACGAGTGTTCTTGGTGCGGCAGAGGAATCATAGAGGACG  
CCAATCACGTCATATTCGAGTGTGGACGTTTCGCAGCGAACAGACAGGAAGTGGAGGATATCATGGGCAG

ACCTATCACGGTGGANAACCTGGTCACGAGCATGATAGAGACCGCACAAAAGTGGGACGCTGCCAGCAC  
CTTCGCAGCAGAAGTAATGCGAGAACTCAGGAGAGTTGAGCGCAGCAGACGGAGAACCGCGGATATTTA  
GGTAGCAAGAACATGCCTGTGAAGCAATGCTTCGCGGCCGTTCCGCAGGCAATCCACGCTACCTAAACAA  
TANCCCANCTATAACCTAAGCTAAATAACTAAGNATAAATAAACTGAATACAAAAAAAAAAAAACACACAC  
ACACACACACACATACACACACACACACACACACACACACACACACACACACACACACACACACACACA  
CACA  
>160\_rnd-1\_family-91\_\_LTR\_\_Gypsy  
TATAAGAGTTAACAACAAATAAATTCATACAGTCCCAATAAGAAGCATTGCAACACCTCATAAGAAGTGC  
AGCAAAATGCTGACTTGGTGTCTGTGCCATTTCTCTCCACGCGCCGACTGGCAACCGCCGAAAATTCCAAG  
AAGAATTGCCCAACGGGCCAACAACATCAGCAGCGACGCCGCTGCCAACGCCGCTGCCGCTAAGCCACA  
GGTTACTAGGGCTAGAATTGATTTAAGTTTATTTCAGTTGCAAATTAACATCAAATAAAGGAAGTCTTGCTT  
CCCTAAAAATTATATTTTTTTCATCGTTTAATAAACTTTGGAATTAAGTGGCGCCCGAGCAGGGACCGGCT  
CGTGTTACAACAGAACAAAACGCTTCTACGTACGCGTTAGTCGGTTATACGCGAAAATAAAACCAGTGCA  
ACTCTCGTCGATTAAATTCAACGATCGGTTAAATTTCGCGAAAGGCAATTGGAAGTTAATTGTTCAATTTTG  
CCCATCGGTGGACAACGCATCTTGTAAGGCCCGCCCGCAGGATACTCTCAACAAAGACTGGTCGCAGGAT  
CCCCAGTAGATACCCAAAGGCTTCAAAAAGGATGAAATCCGGACCGGCAGGGGAGGTTGCCACATCAGG  
AATAGTACTGTAAGTTAGAAATTAAGTGAAACAAAAAAAAAAAAAAAAACAAACGAACAATAACACAAAAG  
TGAAATAGAATTATAAGAATAATAAATACTAAANATTGTAGAACGATAAGCAAGATAAAAAAGTGTA  
ACGATCAACAAATATAAAGACTACGAACGTAGTATAAATTATTTCCAACTTTGCGACTCCCAAGGGACCC  
TCCAAAGTAGAAGGAAGAAACAGCCACTGGTTTTAAAAAGAAAACAAAACGATCAAAAATTCAAGTAA  
AATATAGAGTAAAAAACTAACACTAGATTTAAATATACTTCGAAAATATCTTAAAATATACAATATAAGT  
AATATATCTCGTTTATGGCTAATGAAAGCAATTTAGTTAGGCCCCCAATAGTATCAGATCAACCACAGGTA  
GGCGGACATAACTCGAACAGACAGCAACAACGACATATCGACAGACAAAACGAACATTTACAAAATAGA  
GTCATGGCGAATAACGCAGAACAGATAATAGCAGCCACGGTTAGCCAGATTTTGGCACAACAACTGCCGA  
CATTGGTAAAGCAGTTAGTCAACCCCTCTAGGGAGTTTAGTGACGTAGACGACCAAACAATAACTGCCAA  
CCACAATTTGAATGACTTAGACAGAGTTCCGGACATAGTTAAAAGCCTCAGAGAATTCTCCGGTAATCCA  
GCGGAATTTAGCTCATGGAAGAAGAGTGTAAGATCGTATACTCTCAGCCTATGCAGCTGAGGCAGGTTTCGC  
CAAAATACTTTGGCATATTGCATACAGTGAGAAACAAAATCACTGGCAATGCCGACACGGCCCTCGAGTC  
GTATAATGTTCCCTAAATTGGAGCGCTATCTCCAAATGTCTCACGCTGCACTACGCAGACAAAAGAGAT  
CTGGGAACATTAGAATATCAGATGACAATGTTAGTGCAAGGTAACAACCAAACAGTAGAAGAATTTTACC  
AGGTCGTTTACAACCACTTGTCGCTGATATTAATAAAAGTAGGCTGCATGGAATTAATAGGGAATCCGA  
AACCTTATGACAAAAATATACCGAGATAAAGCATTAGATACCTTCATTAGAGGTTTGAAGGGAGATTTA  
CCACGGATTCTTGGAATAAAGGAGCCAGCAGATCTACCTTCAGCCCTTCACTATTGTTTAAAAGTAGAGA  
ATCAAAGCTATCGCACTAACATGGCTTTGAATAGAAATCAACAGACACATGCCAGAAACCCAAATAGAA  
ATATACCACCACCTACACTGCCACCTCGAACAGCTCAGCCTCNTTTTCGCTCAAACCTTTTAGGCCACCACCC  
ATTAGCTTCAGGCCCACTCCCGATCCATACACCTTGGCCAACCAATACAAACCATGGACCACCGACTT  
ACAACAATAATGGACCGATTCCACAATATCCCAACCAACGAACCTACCAGACACAACCACAACAGGTATA  
CATACCCAATAGACCTTCTGCACCAAAACCCCAACCAACGTCCTGAGCCAATGGACGTGGACCAAAGCATC  
CGCACGAGGATGATAAACTACATGAACAGACCCCAATTTTGAAGTAGGGAAAAGACCTCCACCACCAACA  
AACGCCACGGACAAAAAACAAAGAAATTTCAACATACAAACAGGAGAAGAACAGACGGAGACAGAAAA  
CACCGACAACCTATGTGACTATGGAGGAATACGTACAATCAATGCTAAATTACGAACAGCAGACTGAATAC  
GAACAGCCATTAAACGAATACGCCCAACAAATTGAAGAAACAGATGACGGACAAAATACCCAATACGAA  
CACTCAGACATTAATTTTTTAGGATAAAGAGCTCCTCTCTTCTTACATAGAATGTAAGATGGGGAGCGGA  
AAATTACTCAAAATACTAATAGATACAGGATCAAACCGAAATTACGTCCAACCAAAATTCGTGTCCGAGC  
CTATTCCAAACGAAAAACCCCTTCGAAGCCGTCACAGTCGGCGGAAGCATTAAATTTACACACCACAAGTT  
CGCTAATCTTTTTAATAGAAACGATATAAAAAATAAAATCTTTCTTACCCACCCTAAAATCATTGACG  
CCATATTAGGTAACGATAGTCTAAAGGAAGTAGATGCTGTGATACAAAGCAGCAAGAATCTACTAATAAT  
CAAGAACAACATTTGCATACCCATTAAGCAGAAAAAATAGAGGCGGTCAACACGGTAATACCACGGAC  
AGAACATATGACAAACGAACAAAAAATAGCCTTAATCAACTAGTTAAAATGCACCCACACCTATTTGCC  
AATCCGGACGAAAAACTGACATACACAACCAACGTCAGAGCAGAGATTTCGAACAAAAAACGACTCCCCC  
ATATATTCAAAATTTTACCAATTTCCAATGTCTTTAAAAGACGAAGTACACAGCCAAATCAAAGAACTTTT  
AGAGGACGGAATCATCCGACCCTCCCGATCCCCGTACAATTCACCTGTGTGGATTGTTCCGAAAAAATTA  
GATGCCTCCGGGCAAAAGAAATATCGCATGGTTATAGACTACAGGAACTAAATAAAGAACTACCGCA  
GACAAATACCCTATACCCGAAATCAACGAGGTACTAGCACAGCTAGGCAATAACAAAGTTTTCTCTGTCT

TAGATTTGAAAAGTGGCTTTCATCAAATACCCCTTAAGGAGTCAGACATAGAAAAAACTGCCTTCTCCGTT  
AACAAACGGAAAATACGAGTTTACACGACTCCCATTCGGTCTCAAGAATGCGCCCTCAATTTTCCAGAGAG  
CTCTTGACGACATCCTTCGTGAGCATATTGGAAAAATATGCTTCATTTATATTGACGATATCATTATCTTTA  
GCAAAGATGATGAATCGCATGCGCAGCACCTCGCCGCCATATTCAGAACTCTACAAGAAGCCAACATGAA  
ATGTCAGTTGGACAAATGCGAGTTCTTTAAAAGCAGAGTAGAATTCCTGGGATTTGTCATCTCAGACAAG  
GGGATAGAACTAATCCAAACAAAATTGAGACAATAAGAAAGTACCCACTTCCAAAAACACTCAAAGAT  
TTAAGATCGTTTATTGGCCTTGCCAGCTATTATAGGAGGTTTATAAAAGACTTCGCTAAGCTGGCAAAGCC  
CCTAACCTCTCTTTTAAGAGGGGAAGATGGACGCGTGTCCAAAAATCAATCAGCTAAAAAGCTCATTAAAT  
CTCAACGAAGAAGCGATCGAAGCATTCAATAAAATAAAAAATTCCCTAGTTTCGAATGAGGTAATACTTC  
ATTACCCAGACTTCAGCAAAGAATTCATCTGACAACAGATGCATCCAACTTTGCTATTGGGGCTGTCCTA  
TCCCAGAACAAAGCGACCCATTTGTTTCCTCTCTAGAACTCTCTCTAAAACAGAGGAGAACTACGCCACCA  
ATGAAAGGGAAATGTTGGCAATAATTTGGGCCTTAAAAGCCCTCAAGAATTACCTCTACGGGGTAAAGCG  
AGTGTA AAAATATACACCGACCATCAACCCTTAACCCACTCTCTTAGCAGTTGGAACGGCAACGCTAGGA  
TAAAGAGGTGGAAAGCTTACCTAGAAGAGTTTCGATTACGAACCTCTCTATAAGCCAGGTAGGGATAACAT  
TGTAGCCGATGCGCTATCACGTATCCCTGTGATCAATAATATTGGATCAGTAGCCTCCACCCAGCACAGTG  
CAGACAGTTCAAGCCACAACCTTAATTCCGAGCATAGAAGCTCCAATTAACGTATTCAAAAACCAGATATT  
TCTCAGTAGAGCCAACGAAACAAATTACGAATTCCATATCCCATTCCCAACATTCCACAGGCATACAATT  
ACTCGACCAAATTTCTCAGAACACGACCTTACGCAAATACTGAAAGCTCATCTAAACCCATCCGTAATCA  
ACGGAATAATAACTTCAGAAGAAATAATGAACCAAATTCAGCAGATATATCCCCAACATTTTAGGAACTT  
CAAGATTAGATTACACAGTCTCAAGTAAAAGATTTAACAAATGAAACAGAACAAGATGAGAAGATATT  
GGTTACGCACAACAGAGCCCACCGCAACGCACTAGAAAAACAAAATGCAATTGTCCGAAAGATTCTATTTT  
CCAAAAATGAAGCAACGAATAACAGAATTAGTCAAACAGTGTGAGGTTTGTAAAGAAGAAAAATACGAT  
AGGCATCCCCTAACCCTAACTCAAAGAAACACCAATCCCCGAATACCCAGGACATACAATCCACATCG  
ACATATACACGACAGAAAAAACTTAGTACTAACAGCAGTAGACAAATTCTCGAAATTAGCTCAGGGAC  
GAATTATCAAATCTAGGGCAATAGAAGACATTAAAAAACCACTTCATGAAATCCTTTTTTTATTTTGGCGTA  
CCTAAAGTAGTTGTAATAGATAACGAAAAATCCCTTAATTCAGCCTCAATCACTTTTCATGATGCAGGACCA  
ATTAAATATAGAAGTTTATAAAACACCACCCTACAAAAGCGCAGTGAACGGTCAGGTAGAACGATTTTCAT  
TCAACACTATCAGACATAATGAGATGCAACAAAAGAAAACAGGAATACAGAACATTCGAAGAATACTT  
AACAAATCAATATACGACTACAATACTATACTCGACAATAACAAGAGACCATTAGACATATTCT  
TCGGCAGAAACGTGACTACGGACCCAGACCAATACGAAAAAGCTAGGAAGGAGAACATTGACAGACTCA  
AACAGAAACAATCGACCGACATGCAGAATCATAACAAAAAACGTAACGACATACGAACCTTACATACCTG  
GTCAAGAAATATTCGTCAAAGTCAATACCAGATTAGGTACCAAACGTGTCACCCAGATACAAAAAGGAAAT  
AGTTAAAGAAAATAGAAACACAACCGTACTAACAACTGACAAAATAATACATAAAAGCAATATAAA  
AAATACATAAAAATTACAGATTCCTATTAAACGATGACAATAAAAGCAACATGACACCTGGAAATTTTGA  
ACTACACAGACGCACAAACAATTACAATTCTAAAAGGAATAGGGAACTACAGACATCGACAACACGAA  
TCGTACAAGTCATAGAGCTAGAACAGATTAAAAACGCATTAGATAATCTCCTTTTTTACACCGAAAAAGA  
CTTAACAACCAATACTTTATACCACACTTTACGTCACGAAATAACGCAAGCTATTGTCACTTTCGACACAA  
TATCACTTTTCCATAAACGAAAGACTAGAGCGATCAACATTATAGGCACAGCTTGGAAGTATGTAGCCGG  
CAGCCCGGACAATGACGACTTAATAATGCTTACTGACAACATAAACAACTTATAGAAAACGACAATAAA  
CAGCTTATCATAAACAGGCAATTAGAAGATCGAATTAATAAACTCACGAAAATCTCAAACGATTTAACCA  
ATAGCATAAGAAAGGAATCTCTCATAAGTGATGAGATAGCTATTAGCTTACAAAATCAAATTAGGCTCAT  
AAAAGAAGAAATAATTAATATTAAGTACGCCATACAATGGGCGAAATTGAATTTAATAAATACATTCCTA  
CTTGCGGAAAAAGAAATAGAGATAGTAAACGATAACTTTAATAAAAGCAACATGCCACCTTTAAATATTG  
AAGAAATGCTAGAATTCGCAGATGTATCCATTTTGCATAATGGAACCACTCTGTTTTATATTGTA AAAAT  
CCAAATTTAGAAGAAATAGAATGCAAAAATACTATAATAAAGCCAGTAGTGAAAAACAACAATATAATA  
AATTTAGAATTTAACGAACTGTTTCATTGTAATAAAACAATCTATGGCATAAACACAATTGTAAAAGAT  
ACCATAATATTTAAATTTGTAAACAATCAAAAATTGTAACTTGAACAATAATAATTGTATACCTAAGTTA  
GTTAGCGGAGAGCAAGCGCTCTGTGGCTTTAGCAATGCAGATCATATCCCGGAGATCGAGGAAATCGACG  
AGGGACTTATACTAGTGAACGACTTCAACGGCACTATTAGATGGCAAGAAGAGAAGAAACGCGTGAGAG  
GCACCTACATGATTAACCTTCTGGAACGAAACCTTATTCATCAACAAACAAGAGTTCAGCAACCTAGAGGT  
CACCGTCATGACCCAGGAAATCCCACAATACAAATAACCCCAATAGAAAACGAAAGAATAAAGATTCTT  
TCTCTGGAAGCATTAGAAGAATTGCACATCAACAACATNAAAAACATGCAAAAACCTTCAGACGCACTCTA  
TAGCAAATAGAGTCGGTTTCATAACTCTGTTCACAGTTGCCATCCTTCTTACCTGTGTATTACACGTAATG  
AAGAAAAATAAGAAAAATATAATACTGCAACTGAACAAAGAACAAGAGAGACCCAAAAAAGAACCAGC

ACATATCCAAATACAAAATACAGATGCCAACAACTCAGGTTCAACAACATACCTTTCTTCTGATGATCGC  
TTGAGGACAAGCTTAAATCAAAGGGGGAAGAGTTAACAACAAATAAATTCATACAGTCCCAATAAGAAG  
CATTGCAACACCTCATAAGAAGTGCAGCAAAATGCTGACTTGGTGTCTGTGCCATTTCTCCACGCGCCGA  
CTGGCAACCGCCGAAAATTCCAAGAAGAATTGCCCAACGGGCCAACACATCAGCAGCGACGCCGCTGC  
CAACGCCGCTGCCGCTAAGCCACAGGTTACTAGGGCTAGAATTGATTTAAGTTTATTCAGTTGCAAATTAA  
CATCAAATAAAGGAAGTCTTGCTTCCCTAAAAATTATATTTTTTTCATCGTTTAATAAACTTTGGAATTAAC  
TTATA

>160\_rnd-1\_family-165\_\_LTR\_\_Gypsy

ACAATGATAAGCGACAAAATAAAATAAAATAAAATGAAATTTCAAGAAATATATATATATTCTTATT  
ACCAGAAATGCCTATTAATAAGTTTTCGATAGAAGTATATTTAGAAGCAATATATAATAGCGACGCAGAC  
TTTAGAATTCGTGCATTGAATATTCTACAACAATAAGATAAAAGGCATAATTTTAAATACACTGCCATATG  
TTGGCATTAAAGAAATAGTGGTCCAGTGGACGGCGAGTGCCCAATTATAATGGTAAAACCTTCATAAATAG  
AGAACTATGGAATGGAGTGAATTAGCGAAAAAAATAAATAATTTCAAAGATAAATTCGAAAAATCTTATA  
AGTGTGTTAATAAGAACGCACCTATAAGGGTTGAAACGCTAATTCACCACATAAACATATTAGTGCTAAA  
CTATAATAACATAGTTCAACTTTATTTAAGTAAAGAAAAATAGGCTTACAGAGCAGCATGTAAATCAATGT  
AAGAAAATAATCAAATCACTTGGGACTAGAATATCGAATATCAGCACTAGGCACAACATAGTAATAGATA  
TCCCAACAGATTTAAAATTAATGGCAACTTTTGAACCAGATCAACTAGAAGAACTGAATGAGTCTAAGCC  
AACACTAAATAGTGACCCTGATATTGAAGCTGATAGCGACATTGACCCACTTGAATTAACAGAACCAAAC  
ATGGCAGTAAATCAAGTGGCCTTAGACCGCGAATATGTAAGACAGGTATCGTCTACAGTCCCGGAATTTG  
ACGGCGAAAAGCCGTCCTGGCCAGATTTCTAACGGCTTTAAGACTNGTCGACCGNACNAAGGGTACACG  
AGAAGACTTAGCCGTAGAGGTCATAAAGTCNAAAATAATTGGCCCAATTCTGTACAAAGTACAAAATGAA  
ACNNCNATTANCGGNATTATNAATAAATTAANACCGATGTCAAAGGCGAGTCAACCGACGTTATCAAG  
GCNAAGTTGCTTAACATAAAGCAGAAAGGCAAGNCAGCCNCGCAATNTACAGCTGAAATTGACAGTTTG  
CGTAAGCAACTNGAAGCAGCCTATATTGACGATGGACTAGATTCTGATAACGCNGAGAAATTTNCTACTA  
AAGAAACAATATCTGCCGTGACAAAGAATTGCGAATACGAAAAGCTTCGCGTAATATTAGAAGCGGGCG  
ATTCCGGCANTTTCAATGATGCCGTGGGTGAATATATCCAGTGCAGCACTGAAATGACTGGAAGCGCGAG  
TACAGTATTGTACTACAAAGGCGGAACGACCGTGGAATTACAGCCGTAACAACCAAAGNGGTAGAGG  
CAATGGCCGCGGCAATGGTAACTNCCACTACAANGGTAATAACAACGACAGGGGTAATTTTCAGAGGAAA  
TTACCGNGGTGGCAACCGAGGAAGAAACAATTCCAACCGAGGCGGCAACCAAACCAAACAATAACAA  
TAGAGGTAATGTCCGAGTAACCTCAAGGTAATTCGGAAAACCAACAAAACCCCTCAGATGTTTCAGAGCCAA  
TAAATGGCGCAATAAAAACCATCAACCTTAATCTNAGCATATTTGTAAAAATTAACAATGAAAGAACAGG  
TAAATCACTTGCACTGTAGTAGATACTGGTGCAGATATATCCATATTTAAAAGAAAATNCAGATATATTCG  
AAAATGTAAACGAAAAAATTACTACCCAAATATCGGGCATNGGCGAAGGCATAATTCNTTCAAAGGCTT  
AGCCTTTATAGAACTCACTACAGGTAAATACATAATTCACATAACTTTTCATTTAGTCGANCAAAANTTCC  
CAATACCTAGTGATGGCATACTAGGCATAGATTTTATAAAAACAATNTAATTGCCAACTAGATTTACNCA  
AAGTGGCGACTCGCTCATTCTTCGCCCAAACAACCTTAAATTATCCAATTCAATTACAAATACTTCATACTT  
GTGACAATAATGCCACAGTACTCCCAGCNNGTTCGGAAGTTGTCCGTGAAATACAAATACCCTCAATANA  
AAATCGAATTCTNATACCAAATCAAGAAATTGANGAAGGAATTTACGTGCGAAACACGATATCCAACNAC  
AAAAATGCATNTGTCCGATTACTAAATACAACAAATACCGATCAAATAGTAACTTAAATAAATTAATAAT  
ATGAACCAACTTTCGAACTACGATATAGTTCAAAAAGAAACCAACGAAGAAAGAGANAACCTNCGTTATGNA  
AAAATTAACATAAAACTTTCCACCNCTATTCAAAAATCAATTAAGATTTATGCACCAAGTATACNGAC  
ATATTTCGGACTNGAAACCGAATCGATAACAACCAATAATTTTTTACAAGCAAAAACCTNAGATTGAAGGATG  
ATGAGCCCGTATACATAAAAAATTATAGAAGTCCTCACAGCCAAGTAGANGAAATTCAAGCCCAAGTNCA  
AAAATTAATCGACGATAAAATAGTCGAACCGTCNGTCTCAGAATATAACAGCCCACCTTTTATTAGTTCGG  
AAGAAGTCTCTTCCGGGCTCTGANAAGAAGAAATGGCGATTAGTAATTGACTATCGTCAAATTAATAAAA  
AGCTATTGTCCGATAAATTTCCGCTNCCTAGAATTGATGATATTCTAGATCAACTAGGTAGAGCAAAATAT  
TTTTCATGCCTNGACTTAATGTCNNGCTTTACCAAATTGAACTCGAAAAAAGTTCTAGAGATATAACGTC  
NTTTTCAACGAGCAATGGCTCGTATCGCTTCACGCGATTACCATTCGGTTTAAAAATAGCGCCAAACTCNT  
TTCAAAGAATGATGACNATAGCATTTTCCGGNCTAGAACCATCNCAAGCNTTCTTTATATGGATGATCTA  
ATAGTAATCGGTTGTTCCGAAAAACATATGGTCAAAAACCTTAACTGATGTTTTTGCACAAATGTAGGAAAT  
NCAACCTGAAACTACATCCGGAAAAATGTTCATTTTTCATGCATGAAGTCACATTTTTTGGGACACAAATGC  
ACTGATAAAGGAATCTTGCCAGACGACAAAAAATACGACGTCATNAAAAATTACCCAGTCCCACACGATG  
CGGACAGCGCTAGACGATTCGTTGCATTTTGCAATTACTATAGACGCTTTATNAAAAATTTTGCCGACTAT  
TCACGTCACATAACAAGATTATGTAAAAAAGACGTNAAATTGGAATGGACANCTGAATGCCAGAATGCTT

TCGAACATCTCAAAACGGGCACTAATAAACCCNACCTTGTTACAATATCCAGATTTCCACCAAAGAATTCTGC  
ATAATAACAGATGCAAGTAAGCAAGCGTGTGGAGCGGTTTTAACTCAAAACCATAATGGACTCCAAC TTC  
CAGTTGCATACGCATCAAGATCNTTTACTAAAGGAGAAAGTAACAAGAGTACNACNGAGCAAGAATTAG  
CGGCNATTCATTGGGCAATAACGCATTTCCGACCATATATTTATGGTAANCATTTACGGTNAAAACGGA  
CCACAGACCACTAACATACCTATTTTCAATGGTAAATCCAAGTTCAAAATTAACGCGTATGAGGCTTGAAT  
TAGAGGAGTATAATTTTACGGTAGAATATCTGAAGGGTAAAGACAATTTCTAGCNGATGCGTTATCAAG  
AATAACCATCAAAGAGCTACAAAAAATAACAGGAAAAATAAAGAAAGTCACTACAAGATATCAAAGTAG  
ACAAAAATCCTGCGCAGGAAAAAAAGAAATAGAATTGCCAAGGCAATCTATAGAAAAAGCTTCAAAGCC  
CAACGTATACGAAGTCATTAACAATGACGAGGTACGNAAAGTAGTGACCTTGCATGTAAAAGATATGCTA  
TGTTTCTTTAAACATGGTAAGAAAATTACTGCAAGATATGACGTTAGCGATTTATATACTAATGGAAC TAT  
TGACTTAGGTCAATTNTTCCAAAGGCTCGAAACGCAAGCCGGTATATATAAAATCAGCCAACTCAAAGTG  
GCACCGTGGGAAAATATCTTTGAACACGTTTCAATAGATAATTTCAAAAAATATGGGCAATAAAATATTGA  
ANNCATTAAGAGTAGCGCTACTCAACCCGGTGACCCAAATAAAATAAAAAAGAGAAAAAGAAGCTATATT  
GTCTACACTNCATGACGATCCAATACAAGGAGGTCACACAGGCATTACAAAAACCTTGGCCAAGGTCAAA  
AGACATTATTTTTTGAAAGGTATGACTCGAGATATAACAGAGTACATACGNAAATGTCCAAAATGCCAAA  
AAGCAAAAACNACANAAACACAAAAACCCCTCTAACAATAACNGAAACACCAATANNCGCTTTTCGACAG  
AGTAATAGTNGACACAATTGGTCCACTACCNAGATCAGAGAATGGNAACGAGTACGCAGTCACACTNATT  
TGTGACTTNACNAAATACCTAGTCGCNATTCCGATCCCAAATAAAAGCGCAAACACTGTCGCTAAAGCTA  
TATTCGAATCTTTTATTCTGAAGTACGGTCCAATGAAGACGTTTATTACGGACATGGGAACGGAATATAA  
GAATTCAATTATAAACGATTTGTGCAAGTATATGAAAATAAACACATAACATCNACTGCACATCATCAC  
CAGACAGTTGGAACAGTAGAAAGAAGTCACAGAACTTTTAACGAATACATACGATCATATATATCAGTTG  
ATAAACTGATTGGGACGTATGGATCCAATACTTCGTNTACTGTTTTAACACGACCCCCCTCTATGGCACAC  
AATTATTGTCCATATGAGCTAGTTTTTGGTAAAACACNCAATTTACCAAATANTTTAATAGNATAGACAC  
ACATAGAACCTATATAATGTAGANGATTATGCTAAAGAAGGTAAGTNTAGATTAGAAGTAGCATATAAAA  
GGGCTAGGATAATGCTNGAAAAACATAAGANAAAAAGTAAGGAACTNTNTGATAAAAAAGTNATAGATT  
TTCAAGTANAAATAGGAGATAAAGTCTTATTAAGAAACGAAACNGGCCATAAATTGGATCCAGAATATAT  
AGGCCCATATACAGTAGNNAACATAGAAGATAGGGATAACATNCTAATTAAAGATAACAAAAATAGGAC  
NCAAAAAGTTCATAAGGATAGACTAAAAATTTTTAACGAATAAAACATATAAATGTTCTATATGAAGTCT  
TTATGTTCTTTTATGAATTCACAACAAATAACAAGTAAGAGGTTCTAGTCGGGAGCTCCCGACTAGGGGA  
TACCCTGAACCTCTTCTTCCAACATCAAATGCATATATAATCTATTTTAGAAGCTATATGTCAAGTTTGGT  
TCTAGTCGGGAGCTCCCGACTATGGGATACCCTGAACCTCTTCTTCCAACATCAAATGCATATATATTCT  
ATTTTAGAAGCTATATGTCAAGTTTGGTGACTCTAGCTCTTATTATTTACCAAATTGCCCCAAAAAAGGA  
TATCGATATCGATTTTTATCGATTGCTTGGAACGGAGTAAGCTATCGATTATCGGAAATAAACTCGATCT  
GCGCGGGAAGTAGGAGCACCTACATCTAAAATTTCAAGTCTCTAGCTCTTATATGTTCTGAGATCCTTGCG  
TTCATACATACGGATGGACGGACGGACGGACGGACGGACAGACGGACATGGCTAGATCGACTCGGCTAT  
TGATGCTGATCAAGAATATATATACTTTATGGGGTCGGAGATGCTTCCTTCTGCCTGTTACATACATTTGG  
ATTTTGCACAAATACAATATACCCTTATACCCATTTTTAATGGGTTCAGGGTATAAAAATACATATACATT  
GGCCTGATCAACCAACTATAAAAAAAATCAATCCTTGAAAAATACAAGTTACTATAATGAATTTTACGT  
TTTTATATTTGATATCTTTATACTTTGAAATGTTTACATTAGTATATTCCCATAAATCTTAAATAATTTTTT  
AAATTCATATTATTTTTATCATTTTTTTTACATTTTATTATTTTATAGCAAAAAAAATTTATATACAAAAGA  
TTTTGTTCAAAATAATTAAGTTCATTAAATAACTACACATCCATAATGTTACGTTATTTCTTTGAAAAGGG  
AGCTGTAGTGTGTATATGCCTTAAAAGAACACCCTATATACAAATATAAAGTATAAACAAGCCCAGAGCC  
ACTTTGTATATTGGCTCTGGCTCATATTACGCAGCGCAGTTCCTAGCCTCTCAGCTGATGCAACGATGAA  
CAACAGTTGCAGTTATATCCTTAATTACTTTTAATTATAAAAAAAATTTTTTGTAAAATTGAGCAGCAT  
AGCCCGTAAAGCTATGCGAAATGCTAGGTAGTATTTTGTGTTATTAGCAATATTGAAAACCTTGAAACTAA  
AAACATTGGCATTTAAGTTAAAAATACTATATGTTACATAAAAAACATTATATGAATTTAAAAACATTAC  
ATCAACTTATGTAAGAAATTTTAATTAAAATGGGTTCGAACGAATCCAACATTGAAAAATCAGCCGCAAA  
TGTTATAAATAACATAAAAGTAATTGACCATAAAGAATAATTACTACAATATCTCTTGATCACTAGTATT  
GAAAGTGTATGCAATGCATACAAAGAAAATTAAGAAACGCTATAGCAGTAGAGCAGACGGACTAGATAA  
GGTATGAATATATTTGAATATGTCAGACATAGAGCCAATCATTAGGTTTACGTATAGAGATGAGCCAGAC  
TTTCGTA CTGCGTATTAAACGTA CTGCGATTACATAGAGATTTTATAAAAGTGTGTTATTTTGAATACGA  
ATACACGGACATGTTCAATACTCATATTAATGGTGCGACTGCATCGATACATATCTATTATAATAATATGG  
AATGGAGTATATTAGTGAAAAATATCAATGACTTTAAACACCAATTTGACAAGTCATATAAATGCATCAA  
TAAAGGCATACCTCTAAAGGTAGAAACACTAATATACCATGTACAAATATTGATAAAACAATATAACAAT



ATAGTACATGCAGTAGATTCCATTAAAGAAAACTAACACAAGAACATGCCAAACAATGCCATAAGGTC  
ATACAATCTTTAAATACAAGATATTAACCATTGGCATTAGACAGAATATCATAATAAATGTTCCAGAAG  
ATCTATTTTTACCAGCAAAGTTTGAACCAAACCAGCTGCAAGATCTGAATGAGTCGAAGCACTAGCCAAA  
GAACATATAGACTGGAAAGTAGGCACAAAAAGTATCGGTGGCATCTGGTCCAAAATCGCGAGTAAGGGA  
GTAAGATATACAAATGATGTATTTTTGAACCGCTTACTCTACAGGAAAGTGCTTGGCGCACTCTCTCCAT  
ATGATTTGTGCGATAGAACGACAACGCTGTAACTTTTATCTCGCTCGCACTTACTCTCAGCTCTCAATGCT  
CTCTCTTTATGTTTAGGGATCGTTTAAATGTGTGTGTGTGTGTAT

>160\_rnd-5\_family-3953\_\_LTR\_\_Gypsy

AGTTAACAAGAATACGTTAAAAATTATTCAAAAATTACCTTAGCTCGAGCATAATTTTTATTCAAGGCCTGA  
TCTGCATTAAACAACCTTAAAAATTAAAATTTCTTAACAATTTTAAAATTGTATAATATTTATCATTTCCTA  
TTTTACGTCATTCAAAATAAAATAACTCCAAACGATACAAATGATGCGATACAATAAAAAATATACATAT  
ATCCGCGCATTTAGAAATAAAACAAGTTCTAGTCGGGTGCTGACGAGCATCAATGTGTTTGGGTGCATGT  
ATACAGAAATTCTTGTAATTTGCGCTAACTGAAGCAAACACGATTTTAAAGAAATATTCTACAGTATAAC  
GTTTTGTACCATAGAATATTTGCGCATCTCAAAAAGTAAATTGTATTAAAATTATTTCTTTAATTGGTGGG  
CAATATAAGTTGGGTGAGGTAGTAGCGTGCGGATAGTAGTAGGTGGTGAAAGGTATAAACTGAAAGAT  
ACTTGATATATATACTATTCTAGAGTAAACATGTCACCTTTTGTTGCTTTAGTTCTTATTTTTAACCAAT  
TTTCTCAAAAGACAGGATTTTGATATCGATTTTATCGATTGCTTGAAAACGGAGTAAGTTATCGATCATC  
GGAAACAAATCGATCTGCGCATGAACTAGGAGGACCTACAGCTAAAATTTAAAAGCCTCTAGCTTGTTTAC  
CCTGTTTACCCATTTCAATGGGTTTCAAGAAAACATATAAAAAAAATTTATTTTAATAAATTTTACCTCACT  
TTTATATCATTATTATTATTATTATAATTCATTTAATTACCACACATATATAATATTAGGTTATTTCTCT  
AAAAAGGCAGGTGTAGTGTACTTATACACATATGAATATAAATACATAACTCAACTTGTAACATTTTGCTG  
CAATTCAAAACAAATATCAATGTATAAAGCCAAGCGCATAGAATATATATGATCATGGATCCATGATGCC  
ACTTGAGCAGGCCACGGCAGAGTCAGAACGTTGACCCTGATCTTGACCTTACCCGCTCCGAGAATGAGA  
ATTTATATATGAGTACACCTCTCTCTCTCTCTCTCTCTCTTTGTAGCTGTTAGCCGATAACAGCATA  
AGCATATACATGTATCCTTAGGATAAGTACATTCTACTGACTTTCTATAAATTCATTTCGAAAGACGTATG  
AAAACCAGCACTTGACGTGCTTTACCACAACACAGTTGAAGTGACGATTTTTCTTACACGCCGCTACAA  
ACCGCTCGGCATTGCGATGCTCCGAACGTCATGACCTGCATAACGTAAGTTTCGGGGAAGGGTGACGAAT  
CTCCATCACGCCAGAGAAATTTCTGTGCCGCTTGGTCTTCTCGGCGCACCTTGACCTGATGAAACATTTCC  
CGTATGTCGCCGGATACGGCGATAGGGCACTCTCTGAAGCGAATTTGCACACCCATCAAAGATACTAGTG  
TATCTGGACCCTTCAGCAAACAATCGTTCATTGAAACGAGTCTTTTTATTGTTTCGGATTGATGACTGAAAA  
TATAAGGAGAAACCACGATGTCGTGGTCAGCCATAAATCGAAATGAGTCTAAAAAACGTGTCTCCAAATT  
TGTATGCTTTGTAATATATGTGTATTTTGAATGGGAAATGTAAATCTCTTTATTGAGAGGTAGAACATTAA  
TTTCACCTTCAGCTTTTGACAACTCTCTTACAAACAAAGAGAGTAAAATATTATGAAAAGGTACGGGGAT  
AAATGATTAAGTAATTAACATTACAGGCATCATGAGCGGCCCTCTGAATTTACCAGTTAAGTGGAACA  
TATTAATGCAAATGTCGCAATTTACAGCATTTTGAAATTTATGGTCATCTTCTTAACTTATTTCTGTTGGCT  
TTACAGTAGATAAATATTTGCTATAAATCTCTTTGCATCCGCAATAACCGATGTTACAAAATGTAATCCT  
ACATTTTCTCTACTATGTTGTACGAATTTATCTAAACTAGAATCATTTCGAGATTATATAAAATATGCGTAT  
ACAACAAAAATGTGTTCTTGAATGTTTATTACATTCTCGCTCACACTCCTGTTGATAGGTTTTAAAACGCC  
CTCGAGATCTGCATAAATTATAAAAGGTATATCTAAACTATTTACATAATTCTTAAATTTTAACTGCTTT  
ATCGTTTGTGAAAGCTTCGCCACCACTTTTCCACACTGCTCGCCACGCATCCTGTCGTTATGCGAATAGTT  
TAAGCATACATTACAGAAAAGTAATTTCTCGTATGCTACGTCAGTTGATTGTGTGCAAGCCTGGAGGAG  
AAAATATGCCTGAAAATAAAAAAGAAATGTATTTTTTTTTTGTCTTGAACATAACTTGATAGATTTTTAG  
TCAGTAGTAATTTTAGTAATGTGAAATATCATGCATTTCCAAAAGAAATAGGAAAACCTCCTTGGTGCTCTT  
TAGTTATTTAGAGTGATCGAATAATTTCAATAATATCTTTATCATAGCCAAAAACATTTATACTAAAGTTG  
GTATTTTAAAGCTCAAGCAATTAAATGTTTTTAAAGCTTTAAAGGAAATCCATATAATGATATTTGAGTGG  
AAATATCTTATCAATTTCAATAATTGGACTCCTTTTATCATCGATATGGAGCACGCCTATAAGCATGGGAA  
TACCCTGAACCCTCTTATTCGAACATCTTAACATTTAAAACAAGTAAGAGGTTGTAGTCGGGAGCTCCCGA  
CTAGGGGATACCCTGAACCCTCTTCTTCCAACATCAAATGCATATATATATATTCTATTTTAGAAGCTATA  
TGTCAAGTTTGGTGACTCTAGCTCTTATTATTTACCAAAATTGCCCAAAAAACAGGATATCGGTATCGATT  
TTTATCGATTGCTTGGAACCGGAGTAAGTTATCGATTATCGGAACAACTCGATCTGCGCAGGCACTAG  
GAGCACCTACATCTAAAATTTCAAGTTGTGAGGCGGCTAATGAGACCAGCCGCCCCACAGTTTTTCACGGC  
GAGGAGCCGTCATCCCTTTGGCCAAATTACGGCAAGGAGCCGCTGGCGGGACAACGTATTAATTTCTTT  
AGTTATAAGTATTAATTATATTAGGTTAAGATCTTAGTGAAATAAGAGGCAAGGAGCCATCAGTAATATA  
ATCAGTTTCGATTAGTGAGCAAAGAGGCAAGGAGCCGCGAANATTATAATTGATTTAAATAGCGAATTTGA

ATTTAACCGCCGGCCGCGCTGCAACCGTGCGTTGTCGATCGGTTGCTCAACACCGTCTTCGAGAGCGCAA  
CTTCAATTTCGGCGGCGAAGAGCGAAAGCTCCGAGGCGAAGTTGCGAAAGCTCGCGGCGAAGTTGAGCGG  
CCGAGGCGAGCGCATGGCTTGCCGGCGAGCGCGCCGGCACTTGGGANCGAACGCTAAGGGTGAGTAGAA  
GTGCNGCGCGAGACGAGCGAGGTCATAGATGGTACAGCGGAGCGCTAGGGGCTCCAGAAAACAGTGCGGC  
AGGGTTTAGCTCGGGATTACGATAAGGTCGGAATGAATGAGTAGTGAATAAAGTGCCNACGTTGTAATT  
ATCTAGAAAGTATCGGATNATTCCCTGTTTCCTGGTAACCCGGCTTACCTTAACATCGGAACTAACCGGTG  
TTCGACCTAACCTCGAACGAGGGGCATGCGGTACGAGATTGTGGCTCCGGGGTGGGCATTGCCGGTTGGT  
GTCTAGGTAGTGGAGTTGGTGCGAGGCCACGGCCCGCTAGTGTAGTTGGTGCGAGGCCACGGCCCGCTAG  
CGTAGTGGTACGAGGCCCGCGGCCCGCGGAAAGATAGGGTGTTAGGTAGTGGAGTTGGTGCGAGGCCA  
CGGCCCGCTAGTGTAGTTGGCGCGAGGCCACGGCCCGCTAGCGTAGTGGTACGAGGCCACGGCCCGGTGG  
TGTAGGCGTGCGAGAGGTAGATCTGGGCTTGGTCTGGTCAGGATACTACCCCCCCCCCTTAAGCCCTCTC  
TCCCAGCGAAATTATAAATAACTTGTAACCTCGCTAGACCTGGTAAGACTGAGAATTATACCCCGGCCAGN  
AGCNTCCTTACAAGGTGGCGCCCCGAGCAGGGACCAGAGGGCGTTTAGGGGTGTGGCATGTCCGGCGGATTAA  
AGCCCGCAAGCATGCCCAAATAGGTATTTTCAAAAAAAAAAAGTTTTATTTTATAAAGGGGTATTTTTAGT  
CGGGTATACCCTAGAGGGAAGGTACCCTAGCGGAGAGCAAGAGAATGAGGATATGGTATATGTGCGAAA  
TATGAAANTAGGGNATTAAGTAGTCCGGTATACCCAGCGAACATTTCTATACCCTGTGTTAGGCANAGC  
CAGAAAATGAACACGTGCAGCANNNTGAGTGACGAAAATGCTNGCAGNAANCCGGCANGCAAGGCAAGG  
AGGACGAAAACATAACGGTCGGTTCGTGAGAGTACAGCGCGCGCGCGCCAGCCGGGCGACGTCGAGACCA  
CGCTCGCACACGGGTGCCACACGCGCGGCGCAGTCGACGTCGGCGTCGAAGGACCGTTAAGGCGTCGCG  
GCAGCGGTTGTACAGTGGGGCGAATCCAACCTACGCGCGGTGAAAAGTTGAATTCGTGAGTACAGCTGTC  
GGGGGCAGTGAGGTGGTCGCCCTTTAAGATTGAATGCGAACGAAGTGAACAATAAGAGCGGAACAAGCG  
CCAAATGAAAACGAACGCGGGTTAAAGTGTCAAGAACGTCGAGAGAATTACTTTTTTTTTTTTTTCGTGAA  
ATGGCTAAANTTAAAAAAAAAATANNTGGATAAAAAATAAAATTTTTTATAAATAAAATTAATTAAACAAA  
AATAAATAAAAGAAATAAAACAAACAGTTAAGTACACAAGAATAAACCAAGGTAACCTGGGTAAAGGCGA  
AGGCAGCGACCAAATGAGGAACGGCCTAAAAGCGGAAAAGTGAGAAGGAAAATTTAATTACCTTTTGT  
GAGTTTTTTTTTTTATAAACAAAAGAAAAAAAATACTTTTGTGGAATATTNTTTTGTATTTTTGTTTGGTGAA  
AGATATAAAGGCAAAANAAAAAAAAAAAAAAAAAAGGAACAAAAGTGGCTGAGTAAGATCGGCGTAAAAG  
TGAAAAGACACCAACACCAAGAAAAGGAGAGAGGAATAGTAAAGGGACCGACGGAACCCCTAGAACGG  
GAAGAGAGGGAAACAGCGACGTCGACTAGCAAGGAGGTATACAATAAAGGATGGAGGCAGGTGAGTGC  
CAAAACCCGGGGGTAGGCGTCCGCTGGATTCACCAGCGACGCAAAGAGGAGTTAGTGCGGATCGCCAG  
GAGTTTGGGCTGGAAAAGGAGGGGCGCGTGGAGGAGCTACGTAAGCGGCTGTCCACCTACGTGCAGGAG  
GGCGGTCAATTCGACTGGGATTTGGGCTCGGCTCGCCGAGCTGGAATCCCAGTACGCTAAACTCTTGAGC  
CGCCATCTTGGGGCGTCCCACCCGACTTTGGCGGACGGCCACGGCAAAGTCGGAACCTGACCTCAGAAG  
CTCCCAGCTGTACGGGCTTTTGCAGGCGCCACCCCGAGTTTGACCGTCTCGGGCGTGGAGGCAGTTCCTG  
CTCTCGGTGGAAATGAAGACCGCCGAGCAACTGCGGTCAACGCAGAGGTGGGGAGGTCCCCTGTTGAACC  
GGGTGGTGGTCCCTGCTACACTAGGCCGCACCATCCATCGGAGGCGAGGCCACTTCCCAATGTCCCGGAG  
CAAGTTCGGAAGTGGGGTATGAGGTACGATGGACGCTCCGACCCCTTGGGTTCCTAGAGGACCTCGAGG  
AGCGCGCTATCACCTATGGTATAGCCCTCGACCGTATGCCCAGGGCAATGAGCGAGGTGTTCTGCGATAG  
GGCTGCTCGTTGGTTTCTGAGCAGTGGGCTAAGGGATGTGCCGTGGGCGGTGTTTAGGAGGGATTCTTG  
AGTTTTTCTTGCCCCCTCGTTACTTCGAGAGGCTTGAGGACGAGATCCGATCCCGGAGGCAGCGCGTAGGT  
GAAGCGTTCAAGGAATATTTGATAGAGCTGAGGGCTCTTATGCACCACGCTAGATACGAGCCGGCACAAG  
AGCTGCATCGGATCTACGAGAACGCCGCTCCGGAATACAGGCTCTATGTGCGACGGCAAGACTTTTCTAC  
CCTATCCCAGCTAACTCAACTGGCCGTAGAATACGAGACCGTCGTGAGGCAGAGGGCGGAGTACTCAGGC  
AGCCAACCCTTGGGTGAGGGTGTCTCTAGTTCAAATAGTGCAGAGTGGGCGAGGACGGCGCAGTCCTCGG  
GACATCTCAATCCGTTCCGGTCTGCTCCCAGCGGATCCGGGACGACCGTTGTGGACAACAGGGTCTCCAC  
CCCACCCGCTGCAACTCACGCAGAGGTGGCCCATCGGATGATGAGCCAAGAGGCCGGGAACGGATATGA  
TCCGCGACGGGCGTGTCTGATAGGTGCGCACAGGAGGGGCATTTCCGACGGGAATGTCCCAACGCCCTGTC  
TTATTTTGTGGGTATGTGGAAGCCGGGGCCGAAGTAGTCGGGAGTGTTGCCGCGCGCGGAGACGGGAA  
ACGGGCAACGGCGTCGTCCGGACCAGGATCGGGTCGGCGCCAATACACGCGGAACGCAGCAATAGGACA  
CCCGCTGAAGGTGGACGGTGGCCGGATCGTCGCTACGGTAGAGATCGGCGGACGAACGATGCCCGCCAC  
GATCGATACCGGAGCCACTCGTAGCTTCATGAGTGAGGACTGCGTACGCAAATGGACGATCCGGGGGAAG  
AGCGGAGGAAATACAGGCACGTATCCGCCTGGCAGATGGGTCCACCCTAGAGGTAGAAAAGGCTTTGAG  
AGTAGACGCCAGCTTAGGGGGAAAAACGATCAGCATGACGATGCTCATCATGCCCTCAATGCTGGACCAC  
GTAATCCTGGGTATGGATTTTTTGGGGGCGATGAATACCACAATACGCTGCGGCGAGGCGGAACCTGCTCC

TAGAAGCAGCGACGACACCGGGCGTGAGGCCAGGAACGAGCGAGGAGTCGGAGGAAGGCCGCCCAAGG  
CATGAAAAGGGAGCACCTGCTCGGCTACAGAGGGAGCCGGAGGAAGGCCTCCCAAGTCATGGAAGGGGAGCACCTGCTCGG  
CTACAGAGGGAGCCGGAGGAAGGCCTCCCAAGTCATGGGAAGGGAGCACCTGCTCGGCTACAGAGGGGAG  
CCGGAGGAAGGCCTCCCAAGTCATGAAAAGGGAGCACCTGCTCGGCTACAGAGGGAGCCGGAGGAAGGC  
CTCCCAAGTCATGANAAGGGAGCACCTGCTCGGCTACAGAGGGAGCCGGAGGAAGGCCTCCCAAGTCAT  
GATGGGGGAGCACCTGCTCGGCTACAGAGGGAGCCGGAGGAAGG

>160\_rnd-1\_family-2\_Unknown

TTATGTCGTTTTTGGAACGTCATATCTCCGCGGGGAGTTNTGTCGTTTTTGGAACGTCATATCTCCGCGCGGA  
GTTATGTCGTTTTTGGAACGTCATATCTCCGCGCGGAGTTATGTCGTTTTTGGAACGTCATATCTCCAGCGAG  
GAGTTATGTCGTTTCGGAACGTCATATCTCCGCGCGGAGTTATGTCGTTTTTGGAACGTCATATCTCCGCGC  
GGAGTTATGTCGTTTTTGGAACGTCATATCTCCGCGCGGAGTTATGTCGTTTTTGGAACGTCATATCTCCGCG  
CGGAGTTATGTCGTTTTTGGAACGTCATATCTCCGCGGGGAGTTCCGAGGTTTTTGGAAAAATCTCGAAAAAGT  
TTCGATTTTCGCACCGACCTCTATTTTGAAAAAAGCGTGATGTAACCCCTTGCCATTTTGTGCGATTTGGGT  
CAAAATTTTGGATTTCTTTTTTTGATGCCAATCGTTAGAACTGATCCTTACGAGTCAAAAATGGCATAAA  
ATTCCAAAATCGGACATTATTTGACGGAAATATTGCAAAAAATCATCAAAAAGGTTGAATTTACGAACGA  
ATCGGTTTTTTGTCAACAACATTTTTCAACCCGTCGATGATTAATTTGTTTGAATGCCAATCGATGGTAGG  
GATCCGTACGCATTCAAAAAGGTATAACATTTTAAAATCAGACATTATTTACCCGAGATATTAANAANAA  
TCATCGAAAAAGTTTCGATTTTCGCNCCTACCTCGATTTTGAANAATGTCGTTTTTGAAGGTCATATCTCCG  
CGGGGAGTTATGTCGTTTTTGGAACGTCATATCTCCGCGCGGNGTTATGTCGTTTTTGGAACGTCATATCTCC  
GCGCGGAGTTATGTCGTTTTTGGAACGTCATATCTCCGCGCGGAGTTATGTCGTTTTTGGAACGTCATATCTC  
CGCGCGGAGTTATGTCGTTTTTGGAACGTCATATCTCCGCGCGGAGTTATGTCGTTTTTGGAACGTCATATCT  
CCGCGCGGAGTTNTGTCGTTTTTGGAACGTCATATCTCCGCGCGGAGTTATGTCGTTTCGGAACGTCATATC  
TCCGCGCGGAGCTATTACTCGAGATATCGCAAAAAATCATCGAAAAAGTTTCGATTTTCGNACCGACCTCT  
NTTTTGNCAANAAGCGTGNTNCAACCCCTTGCCATTTTGTGCGATTTGGGTCAAAATTTTGGATTTCTTTTTT  
TTGATGCCAATCGATGGNACNGATCCTTACGCAGTCAAAAATGGTATAAAATTCCAAAATCGGACATTAT  
TTGNCCGAGATATTACAAAAAATCATCGAAAAGGTTTCGANTTTACGAACGAATCGGTTTTTTGTCAACA  
ACATTTTCAACCCATCGATGATTAATTTGTTTGAATGCCAATTGATGGTAGGGATCCGTACGCATTCAAA  
AAGGTATAACATTTTAAAATCAGACATTATTTACCCGAGATATTAAAAAAATCATCGACAGACCTCAT  
TTGAAAAAAGTCGTGATTTGGAAGGTCATATCTCCGCGAGGAGTTGTGTCGTTTTTGGAAAGGTCATATCTCC  
GCGGGGAGTTATGTCGTTTTTGGAACGTCATATCTCCGCGCGGAGTTATGTCGTTTTTGGAACGTCATATCTC  
CGCGCGGAGTTATGTCGTTTTTGGAACGTCATATCTCCGCGCGGAGTTATGTCGTTTTTGGAACGTCATATCT  
CCGCGCGGAGTTATGTCGTTTTTGGAACGTCATATCTCCGCGCGGAGTTATGTCGTTTTTGGAACGTCATATC  
TCCGCGCGGAGTTATGTCGTTTTTGGAACGTCATATCTCCGCGCGGAGCTATTACCCGAGATATCAAAAAA  
AATCATCGAAAAAGTTTCGATTTTCGCACCGACCTCNATTTTGAAAAAAGCGTGATGTAACCCCTTGCCA  
TTTTGTGCGATTTGGGTCAAAATTTTGGATTTCTTTTTTTGATGCCAATCGNTAGAACTGATCCTTACGAGT  
CAAAAATGGTATAAAATTCCAAAATCGGACATTATTTGACGGAAATATTNCAAAAAATCATCAAAAAGGT  
TGAATTTACGAACGAATCGGTTTTTTGTCAACAACATTTTTCAACCCATCGATGATTAATTTGTTTGAATGC  
CAATCGATGGTAGGGATCCGTACGCATTCAAAAAGGTATAACATTTTAAAATCGGACATTATTTACCCGA  
GATATTAAAAAAATCATCGAAAAAGTTTCGATTTTCGCACCGACCTCGATTTTCGAAAAAAGCGTGACG  
ATTTGGAANGTCATATCTCCGCGGGGAGTTATGTCGTTTTTGGAAANGTCATATCTCCGCGNGGAGTTATGTC  
GTTTTTGGAACGTCATATCTCCGCGCGGAGTTATGTCGTTTTTGGAACGTCATATCTCCGCGCGGAGTTATGT  
CGTTTTTGGAACGTCATATCTCCGCGCGGAGTTATGTCGTTTTTGGAACGTCATATCTCCGCGCGGAGTTATG  
TCGTTTTTGGAACGTCATATCTCCGCGCGGAGTTATGTCGTTTTTGGAACGTCATATCTCCGCGCGGAGCTAT  
TACCCGAGATATTAAAAAAATATCATCGAAAAAGTTTCGATTTTCGCACCGACCTCGATTTTGAAAAA  
GCGTGATGTAACCCCTTGCCATTTTGTGCGATTTGGGTCAAAATTTTGGATTTCTTTTTTTGATGCCAATCG  
NTAGAACTGATCCTTACGAGTCAAAAATGGTATAAAATTCCAAAATCGGACATTATTTGACGGAAATATT  
NCAAAAAATCATCAAAAAGGTTGANTTTACGAACGAATGGGTTTTTTGTCAACAACATTTTTCAACCCATC  
GATGATTAATTTGTTTGAATGCCAATTGATGGTAGGGATCCGTACGCATTCAAAAAGGTATAACATTTTAA  
AATCAGACATTATTTACCCGAGATATTAAAAAAATCATCGAAAAAGTTTCGATTTTCGCACCGACCTCG  
ATTTTGAAAAAAGCGTCGTGATTTGGAAGGTCATATCTCCGCGCGGAGTTATGTCGTTTTTGGAACGTCATA  
TCTCCGCGCGGAGTTATGTCGTTTTTGGAACGTCATATCTCCGCGCGGAGTTATGTCGTTTTTGGAACGTCAT  
ATCTCCGCGCGGAGTTATGTCGTTTTTGGAACGTCATATCTCCGCGCGGAGTTATGTCGTTTTTGGAACGTC  
TATCTCCGCGCGGAGTTATGTCGTTTTTGGAACGTCATATCTCCGCGCGGAGTTATGTCGTTTTTGGAACGTC

ATATCTCCGCGCGGAGTTATGTCGTTTTGGAACGTCATATCTCCGCGCGGAGTTATGTCGTTTTGGAACGT  
CATATCTCCGCGCGGAGTTATGTCGTTTTGGAACGTCATATCTCCGCGCGGAGTTATGTCGTTTTGGAACG  
TCATATCTCCGCGCGGAGTTATGTCGTTTTGGAACGTCATATCTCCGCGCGGAGTTATGTCGTTTTGGAAC  
GTCATATCTCCGCGCGGAGCTATTACCCGACGTATTAACAAATCATCGAAAAAGTTTCGATTTTCGCAC  
CGACCTCTATTTTGAAAAAAAGCGTGATGTAACCCCTTGCCATTTTGTTCGATTTGGGTCAAAATTTTGGAT  
TTCCTTTTTTTGATGCCAATCGTNAGAACTGATCCTTACGAGTCAAAAATGGTATGAAATTNCAAAATCGG  
ACATTATTTGACGGAAATATTCCAAAAAATCATCAAAAAGGTTGAATTTACGAACGAATCGGTTTTTTGTC  
AACAAACATTTTCAACCCATCGATGATTAATTTGTTTGAATGCCAATTGATGGTAGGGATCCGTACGCATT  
CAAAAAGGTATAACATTTTAAAATCAGACATTATTTACCCGAGATATTAAAAAAAATCATCGAAAAAGT  
TTCGATTTTCGCACCGACCTCGATTTTGAAAAAAATCGTTNTGGAACGTCATATCTCCGCGCGGAGTTATG  
TCGTTTTGGAACGTCATATCTCCGCGCGGAGTTATGTCGTTTTGGAACGTCATATCTCCGCGCGGAGTTA  
GTCGTTTTGGAACGTCATATCTCCGCGCGGAGTTATGTCGTTTTGGAACGTCATATCTCCGCGCGGAGTTA  
TGTCGTTTTGGAACGTCATATCTCCGCGCGGAGTTATGTCGTTTTGGAACGTCATATCTCCGCGCGGAGTT  
ATGTCGTTTTGGAACGTCATATCTCCGCGCGGAGTTATGTCGTTTTGGAACGTCATATCTCCGCGCGGAGT  
TATGTCGTTTTGGAACGTCATATCTCCGCGCGGAGTTATGTCGTTTTGGAACGTCATATCTCCGCGCGGAG  
TTATGTCGTTTTGGAACGTCATATCTCCGCGCGGAGTTATGTCGTTTTGGAACGTCATATCTCCGCGCGGA  
GTTATGTCGTTTTGGAACGTCATATCTCCGCGCGGAGTTATGTCGTTTTGGAACGTCATATCTCCGCGCGG  
AGTTATGTCGTTTTGGAACGTCATATCTCCGCGCGGAGTTATGTCGTTTTGGAACGTCATATCTCCGCGCG  
GAGTTATGTCGTTTTGGAACGTCATATCTCCGCGCGGAGTTATGTCGTTTTGGAACGTCATATCTCCGCGC  
GGAGTTATGTCGTTTTGGAACGTCATATCTCCGCGCGGAGTTATGTCGTTTTGGAACGTCATATCTCCGCG  
CGGAGCTATTACCCGAGATATTAAAAAAAATCATCGAAAAAGTTTCGATTTTCGCACCGACCTCGATTTTG  
AAAAAANC GTGATGTAACCCCTTGCCATTTTGTTCGATTTGGGTCAAAATTTTGGATTTTCCTTTTTTTGATG  
CCAATCGTTAGAACTGATCCTTACGAGTCAAAAATGGTATAAAATTCCAAAATCGGACATTATTTGACGG  
AAATATTCCAAAAAATCATCAAAAAGGTTGAATTTACGAACGAATCGGTTTTTTGTCAACAACATTTTCA  
ACCCATCGATGATTAATTTGTTTGAATGCCAATTGATGGTAGGGATCCGTACGCATTCAAAAAGGTATAAC  
ATTTTAAAATCAGACATTATTTACCCGAGATATTAAAAAAAATCATCGAAAAAGTTTCGATTTTCGCACCG  
ACCTCGATTTTGAAANANGTCGTTTTGGAAGGTCATATCTCCGCGCGGAGTTATGTCGTTTTGGAACGTC  
TATCTCCGCGCGGAGTTATGTCGTTTTGGAACGTCATATCTCCGCGCGGAGTTATGTCGTTTTGGAACGTC  
ATATCTCCGCGCGGAGTTATGTCGTTTTGGAACGTCATATCTCCGCGCGGAGTTATGTCGTTTTGGAACGTC  
CATATCTCCGCGCGGAGTTATGTCGTTTTGGAACGTCATATCTCCGCGCGGAGTTATGTCGTTTTGGAACG  
TCATATCTCCGCGCGGAGTTATGTCGTTTTGGAACGTCATATCTCCGCGCGGAGTTATGTCGTTTTGGAAC  
GTCATATCTCCGCGCGGAGTTATGTCGTTTTGGAACGTCATATCTCCGCGCGGAGTTATGTCGTTTTGGAAC  
CGTCATATCTCCGCGCGGAGTATTACCGACGTTTTGGA AAAAATATCATCGAAAAAGTTTCGATTTTCGCAC  
CGACCTCTATTTTGAAAAAAAGCGTGATGTAACCCCTTGCCATTTTGTTCGATTTGGGTCAAAATTTTGGAT  
TTCCTTTTTTTGATGCCAATCGTTAGAACTGATCCTTACGAGTCAAAAATGGCATAAAATTCCAAAATCGG  
ACATTATTTGACGGAAATATTGCAAAAAATCATCAAAAAGGTTGAATTTACGAACGAATCGGTTTTTTGTC  
AACAAACATTNTTCAACCCATCGATGATTAATTTGTTTGAATGCCAATTGATGGTAGGGATCCGTACGCATT  
CAAAAAGGTATAACATTTTAAAATCAGACATTATTTACCCGAGATATTAAAAAAAATCATCGAAAAAGTT  
TCGATTTTCGCACCGACCTCGATTTTGAAAAAAATCGTGATGAAGGTCATATCTCCGCGGGGAGTTATGTC  
GTTTTGGAACGTCATATCTCCGCGCGGAGTTATGTCGTTTTGGAACGTCATATCTCCGCGCGGAGTTATGT  
CGTTTTGGAACGTCATATCTCCGCGCGGAGTTATGTCGTTTTGGAACGTCATATCTCCGCGCGGAGTTATG  
TCGTTTTGGAACGTCATATCTCCGCGCGGAGTTATGTCGTTTTGGAACGTCATATCTCCGCGNGGAGTTAT  
GTCGTTTTGGAACGTCATATCTCCGCGCGGAGTTATGTCGTTTTGGAACGTCATATCTCCGCGCGGAGTTA  
TGTCGTTTTGGAACGTCATATCTCCGCGCGGAGTTATGTCGTTTTGGAACGTCATATCTCCGCGCGGAGTT  
ATGTCGTTTTGGAACGTCATATCTCCGCGCGGAGTTATGTCGTTTTGGAACGTCATATCTCCGCGCGGAGT  
TATGTCGTTTTGGAACGTCATATCTCCGCGCGGAGCTATTACCCGAGATATTAAAAAAAATCATCGAAA  
AAGTTTCGATTTTCGCACCGACCTCGATTTTGAAAAAAACGTGATGTAACCCCTTGCCATTTTGTTCGATT  
TGGGTCAAAATTTTGGATTTTCCTTTTTTTGATGCCAATCGATAGAACTGATCCTTACGAGTCAAAAATGGT  
ATAAAATTCCAAAATCGGACATTATTTGACGGAAATATTCCAAAAAATCATCAAAAAGGTTGACTTTACG  
AACGAATCGGTTTTTTGTCAACAACATTTTCAACCCATCGATGNTTAATTTGTTTGAATGCCAATTGATG  
GTAGGGATCCGTACGCATTCAAAAAGGTATAACATTTTAAAATCAGACATTATTTACCCGAGATATTA  
AAAAATCATCGAAAAAGTTTCGATTTTCGCACCGACCTCGATTTTGAAAAAAATCGTGATGATTTGGAAG  
GTCATATCTCCGCGCGGAGTTATGTCGTTTTGGAACGTCATATCTCCGCGCGGAGTTATGTCGTTTTGGA  
CGTCATATCTCCGCGCGGAGTTATGTCGTTTTGGAACGTCATATCTCCGCGCGGAGTTATGTCGTTTTGGA

ACGTCATATCTCCGCGCGGAGTTATGTTCGTTTTGGAACGTCATATCTCCGCGCGGAGTTATGTTCGTTTTGG  
AACGTCATATCTCCGCGCGGAGTTATGTTCGTTTTGGAACGTCATATCTCCGCGCGGAGCTATTACCCGAGA  
TATTAATAAATCGTCGAAAAAGTTTCGATTTTCGCACCGACCTTCATTTTGAAAAAAGTCGTGATGATT  
TGGAAGGTCATATCTCCGCGCGGAGTTATGTTCGTTTTGGAACGTCATATCTCCGCGCGGAGTTATGTTCG  
TTTTGGAACGTCATATCTCCGCGCGGAGCTATGTTCGTTTTGGAACGTCATATCTCCGCGCGGAGTTATGTTCG  
TTTTGGAACGTCATATCTCCGCGCGGAGTTAT

>160\_rnd-5\_family-6782\_\_LTR\_\_Gypsy  
TATAAGTTAACAGAGGCCAACGACACCAGCTCCAGATGCTGATATAGCACTGAGCCGGATGTTCTTACGA  
GCTAACAGGGGTCAGCGAAATGCAACATAACACCAGCCGCAGATGCTGACATAGCTCTGGGCCGGATGTT  
CTTGACGACGGCAGCGCACGAGGCGCAAGCTAAGCATTCTAGCGGCCGTTGTGAAAGCACACAATAGCT  
TAGGTATTTTTGATCAATCTTTTGTAAATTTAGTTTTTAATTCGACTTTCCTGCGGCACATCGGCCAGCG  
ACTTCGTGTATAATTTAACTCACTCACTACGGCGTGTGCGCCTAGTGTTTTATAAATCATTATCAAAATAA  
AGTTCTATCAAAATAATCCGCGAGGACTTATTATTTAAACCTAATTGGCGCCCAACGTTTTTTCGGACCAT  
TTTGTTCCATAATTATTTTGTGTGCTGTGCAGTGTAAGAATAACCTACCAGTGCAAACAATAAAAGCTG  
TGCCTGACCTACATCAACTTACGTCAGCGGCACAAGCACATAAAAAACCATTTGATACACCGAAGCCGCT  
GGAGCTCTTCGGCCAGCGACTTGTACCAAACCAGCGCGCAAGCGGGTTTGGGCAGCGACGTAAACCAAC  
ACCACAGACTTCAGCGAGGGATAAAAAAAAAAGCATTCGCGACTGCAGCGTGGAATCAGTAGTTTTATAC  
GTAGAACATAACAACCTTTCTAGGATCAAATAAAATGTAAGTGGGCCATCATTGTCACAACTTTTTTCAA  
TTTGCGTGATTTATTTAAATAAAATCGTAAAAAAATATAAGTAGAAATATTAATAATTGCAGTAATTGTGT  
TCCCAACTAACTTTGAGTAACACAATTTTGCCTCCATCAGCAATTTCAATAAACTCTCCTCTGTCAGCATT  
CATTTAATTTACCGTTGTTGATTTGCCCTTGAAATTGTGTGTTATTATTGTTGACAAGTATAGTCCATGAA  
CAGCTCGTTTCTCAGGTACAGAGACCGCTCTGCGAGGGGATCTGAGTCAGACGACTCCACCACCTTAGAT  
AGGGAAGCCGTCCCGCAAAAAATCGCTGACAACAGGTGTAAAATAGGAATGGAGCCTGAGCAGCTTAGG  
GCCTTGGTGCAGGCCGCGAGTGGCCTCCGCCTTAGAAGCACAGAGCGCAGTATTGAAGCAAAGAGATGCA  
GAGCTGAGGGCTTCCTTAGACGCTCGGATACAAGAATTGGCAGGCAGAATATCTGCCAGTAGTATAGAAA  
CACCGCCGGTCCAGGCATTTGAGCCGGTGGAAATCAGAAACGACGTCCAATGTAATGAACCATTGGACGC  
CGTTAAATGCTTACCAGAATTTACGGGGGTGCCAGAGACGTACGCCTCTTGGAGACAAGCTGCGATAGCG  
GCATATAAAATTTACAAGCCATACGACGGCAGCTCACGCCACTACCAGGCGGTCATTATTATTAAGAGCA  
AAATTAGAGGGGCAGCTGACGGCGTTTTGGGTGAGTTTGGCACAGTAATGAATTTTGATGCCATAATAAA  
CCGTCTCGATTTACATACAGGGATAAGAGAGGCATTACGTCATAGAGCAAGAGATGAGCACCCCTAAGA  
CAGGGCTCGTTAACAATTTTACAATACTATGACGAGGTTGAGAAAAAGCTTACTCTTCTACCAATAAGGT  
CAACATGTCCTATGAACCAAGCATGGCACAAGGGCTCTGTACGAAGTTCAGAGATGATGCGTTGCGTGTT  
TTTGTCTCAGGCCTAAAGCGTAGCCTGACGGATGTCCTGTTTCGCGGCAAAGCCTAAGGACTTACCGTCGGC  
CCTAGCNCTAGCGCAAGAGGTAGAGGCAAACCATGAGAGGTACGCCTTTGCCGCTAGCTTCGCTAAAGGG  
CAAGAAGATAGGGAACGAAAAGTGACCCCGAGGCCGAGGTCCGTCAGCAAGATAGGGGTCAACAGCAG  
GGGGATCCGCAACCCAGCGGTTCCAAAAATCCTCACTTCACTAAACAACAGAAACAGCAACAAAGTCAAT  
TTGAGCAACAGAGTGGCAGGTGGAACAAAGGTGGCGGGTCACAGGAACCAATGGACGTCGATCCATCTG  
TGTCAAAAATTCTACAACCATCGCAAGCACCAGCCTACGTTAACTCTAGCGCTCCTCAAGCCTACAAAAG  
AACGGCCACGTCTGGGCGCTTAAGCGGACAGAGGAGGCAGAGAGTCAATCACACAGCTCACGAGCCNGA  
TCAAGATTGAGGTTTCGTATGCTAGCTCTGCAGCAGCAGCAGAACAGCAAATTGCCGACGACAATGGTAGC  
GGNTATGACTCAGACACTCTCAATTTTTTTAGGGGAAGCTCCCTGCTGCCCTACATCAGTAGGAGAGTAGC  
AGGGATCCAGATGAGATTTCTCATCGACACGGGCGCTTCCAAGAATTATATCAGGCCACATAAAAAATCTA  
AAAGGTGTGTGCCAGTAAATTCTTCTTCTTCTACCCATTCTATACAGGCACCACGAAGATCACTCATAA  
GTGCCTTATATCTCTGTTTCGGCAAACTGCCACATTTTTCTTACTCCAGACCTGTCCACATTTGATGGAAT  
TGTGGGGCTCGACTTGCTCACGCAAGCAGGAGTGTCGCTTTGTCTTTCTTCTGGCCAACTCAAATGTGGCG  
CAGAACTGAACAAATCGAATTCCACAGGTGCGCGGATGTTAACTTTACCAATGTTGACTGCGCCGACGC  
GCCCCGATGCTGTAAAAGATGCATTCTTAAAGATGCTAAAAAGCAAACATAAGGCCTTCGCGGATCCGGAA  
GAAGCACTTCCCTATAACACATCAGTGGTGGCAACCATCAGGACCACTGATGAACAACAGTTTATGTCC  
GACTGTACCCCTATCCCATGGGAGCAGCGGAATTCGTTAATAAAGAGATTCAAAGCCTTCTGAAGAACGG  
TATCATCAAAAAATCTGTCTCCCCCTACAACAACCCCATTTGGGTGGTGGACAAGAAGGGGACGGACGAG  
TTTGGTAACAAGAATATGCGCCTCGTAATGGATTTTCGCAAACTTAACGAGAAAACCATCGCAGACAGAT  
ACCCTATGCCTAACATTCCAATGATTTTGGGGAATCTTGGCAAAGCTAAATACTTTTCGACATTGGACCTA  
AAATCCGGCTATCACCAGATCACGCTAGCAGAGCGTGACCGTGAAAAAACAGCCTTTGCAGTTAACGGGG  
GGAAGTACGAATTTTGTGCGACTTCCCTTTGGGTTGAAGAATGCGGCCAGCATCTTCCAAAGAAGTGTGAC

GACGTACTGCGTGAGCAAATTGGCAAATCTTGCTATGTCTACGTTGACGATGTCATCGTCTTCTCAAAAGA  
CGAAAGTTCTCATGTCCAACATGTAGAGTGGGTCTTAAAGAGCCTGTACGAGGCCAAATATGAGAATCTCC  
AAGGAAAAATCGCGTTTTTTTAAAGAAAAGCGTAGGTTTTCTTGGTTTCGTGGTAACCAGTAATGGAGCTAC  
AACGGACCCCGAAAAAGTCAAAGCGATTTCAGGAGTTCCCAGAACCAGAAAGTATATTCGAGATCAGATC  
ATTTTTAGGACTGGCCAGTTACTATAGGTGTTTCATCAAAGACTTTGCCTCAATAGCAAAACCCATTCTG  
ATCTTCTAAAGGGCGAGAATGGGTCAGTAAGTAAACATAGATCGCGAAACATCCCGGTAGAATTCTCTGA  
GCTTCAGCGTCACGCATTCCAAAAGCTACGCAACATTTTGTATCAGAAAACGTCATGCTCAGATACCCTG  
ACTTTAAGAAGCCGTTTGATCTAACGACAGACGCTTCAGCTTACGGCATAGGGGCAGTGCTTTCTCAAGA  
GGGTCGCCCCATCTCAATGATTTCCAGAACATTGAAACCCCGGAGGTGAACTACGCCACCAACGAGCGG  
GAACTTTTGGCTATAGTTTGGGCCCTTAGCAAGCTACGTCACCTATATGGGGTAAAAGACATTAAACAT  
TTTCACGGACCACCAACCGTTAACTTTTGCCGTTTCTGAGTCAAACCCGAACGCCAAAATTTAAAGATGG  
AAGGCGCGCATTGAGGAAACGAATGCGCGAATATTTTATAAGCCAGGCAAGGAGAATTTAGTTGCTGATG  
CGCTATCGCGACAACAGCTCAACGCTCTTGACGAGCTGAATACTGATTCTGCGCAGCCACAGTCCACAG  
CGAGCTGTCCTTGACCTATACAATTGAGTCGACCGAAAAGCCACTTAATTGTTTCCAAAATCAAATTGTCA  
TTGAAGAGGCACGCGTCCCCACCAAACGCAACTTCATTCTTTTCGGGGACAAGAGGCGTCATGAAGTGAG  
CTTCACTGATCGCACAGCCCTTCTAGATGAACTCCTTGACTTGATTAATCCAAATGCGGTCAATGCCCTCT  
ATTGCAACCTGCACACACTAGCACAGGTGCAGGATGGCTTAGTTTCGCATGTTTCCAGGCACAAAGTTCTG  
GCACTGCAAAAACCGAGTTGCAGATGTCTTCAACGTTGATGAGAGGAGAGAAATTCTCGTTGCCGAACAT  
AATAGAGCGCACAGAGCAGCTCAAGAAAATGTTAAGCAAGTGTTATCAGAATACTATTTCCCTAAAATGG  
CGAAGTTGGCTAAGGAAATTGCGGAAAGTTGTAGAATCTGCTCAGCAGCCAAATACGATAGGCACCCGA  
AAAGACAGGAGCTGGGAGAACTCCGATCCCTGAGACTCCTGGGGAATTTCTACACATTGATATTTTTTCC  
ACGGACAAAAAATTTTTTTTGACCTGTGTTGATAAGTTCTCTAAATTTGCAGTCGTACAACCAATTCAGTC  
GCGCACTATCGGGGACTTAAAAGCTCCACTACTGCAGCTCACGAATTTCTTTCCACGAGCCAGAACAAATTT  
ATTGCGACAACGAGCCTTCGATGAATTTCTCAAACGATAAAGACCCTGTTGTTAAACAACACTACGGAGTCCA  
TATTGTTAATGCGCCGCCGCTGCATAGCACCTCCAATGGCCAAGTCGAGCGCTTCCATAGCACTCTAGCCG  
AGCTTGCACGTTGCCTCAAGCTGGAGAGAAACATCAGTGACTCAGTCGAAGTCATAATGCTAGCCACGAT  
TGAGTATAACAAGACAATACATTCGGTCATCAACAAGAGACCTGTTGATGCCCTCCATGTGCCCTCAGGC  
GAACCCGAAGGGGAAATATCAGCAAAGTTAAGAAGTGACAAAGATGCGCTCCGGGCTAGGCTGAACGAC  
CAGCGACAGAATAGAGTCTTTGAAGTAGGCGAAAAAGTNCTAGTAAAAAGAAACCGCAGGCTTGGAAT  
AAACTCACGCCCTTATGTGAAGAACGGATCGTAGAGGCAGACCTTGGCACGACCGTTCTCATTGGAGGGA  
GGGTGGTCCACAAGGACAACCTTAAGTAGGGCGCGAGAGCTGAAATAAAACATCGATTCTATGCATCTTG  
AATTTAACTATAAGTTTCAACATTTGAGCCACTAGGCTTCACCTTTAAGTTTTAATATTTACGCCACTTGGC  
ATTNCCTTTAGGAAGACACGTNGTAATAGTTTGGTCCGTTTTGTCTGTCTTCCGCAGGTTTCGGGTTTCTGCT  
ATTTCTATTTTTTTGCAAGTGCGGCAGCGCGTGTGACTAATTACTCACACGCCAAGTATATTCCCATTGTTG  
AGGGCCAAGTTCTGGTCTGGGAGGAATTCAATTTTCGTACAGGCACACAGCAAACATCTCTGAGTACGAGAA  
AATGGTAAACGAAACAATGGAGCTATGTGAAATGTTTCCGCAGTCACACATGAGAAAGCTTCTAAGCGTA  
GATGCGTCCCACCTCAGAGATCTGTTAGAAGCTCTTGGCGTGACCCACAGGGTGGCAAGAAGTTTAGATT  
TCTTGGGCACAGCCCTCAAAGTAGTTGCGGGAACACCTGACGCCAGTGACTTCGAGAAGATCAAATTCAC  
TGAGTTACAGTTGGTGAACCTAACAACNGACAGGTAGCTATCAACACAAAAGTTTCAGGAACAAATCAAT  
CAACTCACTACAAGTGTCACACATTACTAAAAGCTGCAAAAAAGAATCAGATAGATTCCGGGCATTTAT  
ACGAAACTCTTTTAGCTCGGAATAGAATGTTGCTGATGGAAATGCAGAATTTGATGCTCGCTGTTACCCTT  
GCAAAAATTAATATCATAAGCCCAAATATATTAGATCACGCAGATTTGAAATCTGTTTGGGTGATGAAC  
CCACAGGTACTTCAATAGCTGACCTTATGTCCGTTGCGTCCGTGAAAGTATTACAATCTGTTAATGCCCTT  
CACTTTATCATTAAGTTCCCGAAAATCAAATGGCTTGCAGAAAGGTGATGCTGTATCCAGTTGCACATGA  
GAATGCTGTGCTACAAATTGACGACAACATTATAGCTGAGTGCGGAGATCAAGTGCTTGCCCTTAAGAAT  
TGCATTTCCACGCCGGGAGGAACCTTTTGTCAACTTTCACCGACCAGCTCTTGTGCCAGAGAGCTGCATGC  
TGGTGGCTTGGCAAACCTGCCAAATGCAGCCGAGTCACTTAGACCCGATCACATGGGTGCTGACGGAATT  
CTGATCATCAATAACCGGCCTGCTAAAGTTTGCCTGACAACGGTACTGAGACTTGGGTTTACGGAACGA  
ATCTAATCACGTTCAATAATTGGGCTCTGATCAACGAACTAAGTACTTGAATCGCAACAACGTCCAGAG  
TAAGTTCCCCGGCATCGCGGCATCTCCCCTTCTGAACGTCACCGGCCACCAAGACGTGCTGAGTCTCCCCT  
ACCTTCATCGCCTGAATGAACGTAACCTGGAGATCATCAAGGAAGTCAAGGACGAAATTGGAAGCGTCGA  
CAGCGTGGTAATAGCCTTCTTGTGGGTGCTGTGTGTTGCACCATAATTTGCGTTCGGAGTCACCTACCGTC  
GGTTCACCAAAAACATGGCATCGGCCAAGGAGATTAAGAAGGTGATCGCCGAGATAGGAGCGGCCGAGG  
GCGGCCTTAACCTAAAAGGGGAGCAGTTAACAGAGGCCAACGACACCAGCTCCAGATGCTGATATAGCA

CTGGGCCGGATGTTCTTACGAGCTAACAGGGGTCAGCAAAATGCAACATAACACCAGCCGCAGATGCTGA  
CATAGCTCTGGGCCGGATGTTCTTGCACGACGGCAGCGCACGAGGCGCAAGCTAAGCATTCTAGCGGCCG  
TTGTGAAAGCACACAATAGCTTAGGTATTTTTGATCAATCTTTTGTAATTTAGTTTTTAATTCGGCTTTCA  
CTGAGGCACATCGGCCCAGCGACTTCGCGTATAATTTAACTCACTCACTACGGCGTGTGCGCCTAGTGTTT  
TATAAACCATNATTAATAAAGTTCTATCAAAATAATCCGCGAGGACTTATTATTTAAATCCTAATTTAT  
ATAT

>9\_rnd-5\_family-6356\_\_LTR\_\_Gypsy

GTGTAGCATGCGTACATATGTATATACATACATATGAATAAGGCTGCAACACTTTGTTGTTATGCCAACAG  
AATGCAAACATAAGCAGCGACTTTGTGCGCAGCGCGCCTAACGCTAAGTGCCCTCTGCGCATATTCAAGTG  
CAGACGAAATATGATCCGCACTTGATAACAACGACCGCCCAAATAGCTAAGTCAGCGTTCTCACGCTTGA  
CCGTCGCTGTGTATACATATGTGCGCGCATGACTCTCTGACTCTCTTGCTGTATATAATAAGCCTAAAA  
CCATGTATGTAAAACGGCTGCTCACTGCTTCACGGTGGACAGCTCTAACTCCAAAAACATTGAATAAAGA  
ACCATCAAGGAAGACTGACGTCTTTTCATCAGGGAAGTATTATATGGCGACCGTGACAGGACTGGATCAG  
CTCCTGTTTTAGCTGATCGAACCCTGTATGTACTGTAAGTATTGAAGAGGACGAAGGAGGCAACAACAA  
CAAGCAAAGGCGGAACAAAAAAGCTGAGTGAGTAGAGTGAGTGAGTGTTATGGGTGCGGGTG  
GCCGGGTTAAAAAATTGAATAAAGAAATTGCTCACATTAAGTGGAATTATATTCACCCAAAGCCAACAC  
ACCGTGGAAGCAACAGCAAGGCTACAGGCCATGCTTGACTTTTATCAGCAACAGCTGAAACAGATAAA  
AGAAAACCCTACACCGCATACTCACTCAGTGAATATTAAGTTGTTAATGACAAAACCTATAACCACACCA  
CCTCCCAAAGCAAAGTGCCTCAGTACGTCAAGCAATGCCCCGGCAGATTGCCCTGGACCTCTGGACAGCC  
CACACTGCAGATCGACTTGCCTGGTAAGGCAGTNACCTGTGCGAAGACCGGCACCGGTTCCGCCTGAGCC  
CATAGGCCCAGGACAACAGCAGCTGAGAAATCAACAAGCGCGAGAGGCACCCAGCCCCCTTGAGCCTTC  
GAAGGGAGCGTCAGCGCAACCATACTGGTGATGACCAGCTGACGCGGAAGAACAGGAACAGCAGACACC  
AGCAATAATTTTTAAATAAATATATATATATTATATTCGAAACAATTTATGTAAAATTGAGCAGAAAA  
ATCTTTTGCCCAATCAGAAGTGAGGCCCATAAAGCCACACTAAAAAATTAGGCAGGTTGCTATGTAAAA  
AAAAAAAATTTTTACACGTCTCAGGCACTGGGTAACTACCCAGTAGCAAACAAATTAATCCAAATCTT  
AAATTCCAAATAAATTTTTGAAATTTTAAAATGAAAAAATAATAAGTTTTTCAGTTCAGTCAGTTTAA  
TCAGAAATAAAAAAACAATTGAATCAAATTAAAGCCATAGGCAGGAAAAAATGTTCTATTTA  
TGAATAGTAATGCAATAAGTAAGTTTTCCGAAGATTTTCTAATTGAATCAAATCATAATTCTGAACAGAA  
CTCCAAAATGGGATTATTAGACGTTAAGTCAGTGGATTCCACTGCTAACGTTATAAATAAAGTTGAATCA  
AACAAACAGATTTAGAATTAACAAATATATTACTGGTAATCATAGTTGTTATAATGTGTGCAAATTGTTT  
TTATAAAATATATAAACTGCATAACAAATGCCTAAAGAAAAGATTCATGAGCCGAGCAAATGACTTGGAC  
AAAATTTAAATTTGCACAGCACAAACAACATGATTAATCATAATTGACAATATCATAATAACTATAAGA  
TACCAATTAACAAAATAAATAAATGAACACACAGTATGATGAATAGTAAGAATATCCCAGAATAATC  
TTGAAAACCAAAGTAGCTTGTCATATTATGGAATGGCCAGAACTTTCTGAGCGGATCCAAAATATTAAA  
ACGACATTTGAAAAAGCGTATAAATGTCTAACACAAAATAGACAAACGCATATAGATACAGTTAATAGGC  
ACTCCATAACATTGATCGACAGCTTTAACGAAGCTCGAATATTGATATATCAACATAAAGATGTATTAACC  
AATGAACATTGGTCAGAAACGTCAAGGTTGCTAATAAGACTGAGAAATAATATACAAACAGTTAAAGAC  
AAGCATAATTTAAATTTAATACTACCTTCTATTTTGAATACACCCGCAAAGTTGGAACCTCGGCGAAAACCT  
TGAAGTTCGGACTGAGGATATTCAATTAGAAGAAGAAGATTTAACAAATCTAACAAATCCCTGCTGTTATC  
ACACTGGATTCCAAAGATATTTTATCCGAAAGTGAAGAAAGTGCTGATAATAGCCGTATAATGGTTGACA  
CAGCCGCTGCCCAGAGGGCATATATTAGGGAAATTGCACAAGCAGTCCCAGAATTTGACGGAAAGAAAA  
CCCGTCTTGAAAAATTCTTAACGGCATTAAGACTTGTCAACTTAACAAAGGGAAGTTATGAGGAAATTGC  
CATAGAGTTGATTAAATCAAAAATAACGGGCACAACCCTCAACAAAATAAAAAATGAAACCACAATAGA  
CGGAATTATTGCAAAATTAAGCCGTAGTTGTCGGTGAAACACCCGCCAACATAAAGGCAAAAATGGA  
CACTTTAACGCAGAAAGGCAAAACAGCCACTCAGTTCACAACTGAAGTAAAGTCTGCGACAGCTTCTT  
GAAGCTGCTTATATTGACCAAGGCATACCATCTGAAAATGCTGACACGCTCAGCACTACAGAAGCCGTTA  
ACACAATGATTAGTAAACTAGTCACGAAAGTGTTAAAACCGTTATGGAGTCTGGTATTTTCACTACCATG  
GATGCTGCCGTTAGTGCATACATCCGTACTAGTACAAGACTTACTGGTAGTGTGAATACAGTGATGTACTC  
TAAAGAGGGAATAACAACCTACCGCGGTAGTAACAATCGTGTTAACTATCGTGTTAGAGGCAATGGTAA  
CTACCAAAACAGAGGAAATAATAACTACGGTAATCAAAACCGTAGAGGCCGAGGAAATGGAAACAACAA  
TTCCAACCGAGGCCGAAACAACCAAAATAATAATAACAAACAATGTTAGAGTAACCCAGAACAAATCA  
GGGAAACTCTCAACAACCTCAGATATTCAGCAGTAGGAAATTATGCGGTTACATACCATCAATCTTAGTTT  
GAATATATTTGTAACTTTTTCAATGTGAAGACAAATAAAAACTTGTATTTTAAATAGATACTGGTGCAGA  
CATATCCCTGTTAAAGGAAAATTCTGATATCTTTCATGATATCCAAATAAATAAGAAGATCAATATTCAAG

GCATAGGCCAAGACATAATACAGTCCAAAGGACTGATTTCAATAGAGATACAGACAAGTAAATACATAA  
TTCCACACGATTTTCACTTAGTAGATTTGCATTTTCGCAATACCTTGTGATGGAATAATAGGCATTGACTTC  
ATTAAGAAATTCAATTGCCAGTTAGATTTCAAACCAAATGAAGATTGGCTCATAATGAGACCAAATAATC  
TAAATTTCCCAATTTATGTTCCAATAACATACAGTTCTGGTAATAATTCCATTGTTCTACCAGCAAGATCCC  
AAGTAGTCAGAAAAATTCACCTATCATCAGATGAAGATAGTGTACTAATTCCAAACCAGGAAATTAAAGA  
AGGCATTTATGTTGCAAACACAGTTGCAACAACCAAAAATGCATTTGTCCGATTACTGAATACGACCAGT  
ACCGATCAAGTAGTAGATATTAATAAATTTGTCATATGAACCACTTTTCGAACTACGACATAGTTCAAAAACA  
ATCCAGAAAAATAGAGAAAAACTGTCTTATCTCAATTAGCTAAAAAATTTTCCACCACAATTCAAAAACGAA  
TTGACTAACTTATGCACCCAGTTTATGTGACGTATTCGGACTCGAAACCGAATCGATCACTACCAATAACTT  
CTACAAACAAAAGCTAAGATTGAAGGATGATGAACCAGTCTACATAAAAAAATTATAGAAACCCTCAAAG  
TCAAATAGATGAGATACAAGTACAAGTACAAAAATTAATCGACAATAAAATAGTCGAACCGTCTGTATCC  
CCTTATAACAGCCCCTTTTGTAGTTCCGAAGAAATCTCTTCCAGGTTCTGACAAGAAAAATGGCGATTA  
GTAATTGACTATCGTCAAATTAATAAAAACTGTTGTTCGGATAAATTCCCGCTGCCTAGAATTGATGACATT  
TTGGATCAACTAGGAAGAGCAAAATACTTTTCATGCCTTGATTAAATGTCAGGATTTTCATCAAATTGAACT  
CGAAAAAGTTCAAGAGATATAACGTCTTTCTCAACAAGCAATGGCTCGTATCGCTTCACGCGATTGCCATT  
CGGTTTAAAAATAGCGCCGAATTCTTTCCAGAGAATGATGACTATAGCATTTTCCGGATTAGAACCTTCTC  
AAGCTTTCCTTTATATGGATGATTTAATAGTCATTGGTTGTTCCGAAACACATATGCTCAAAAACCTTA  
GATGTTTTTTGAGAAATGTAGGAAATACAATCTTAAATTACATCCTGAAAAATGTTCATTTTTCATGCATGA  
AGTCACATTTTGGGACACAAATGCACGGATAAAGGAATCTTGCCTGACGACAAAAAACGACGTCATTAA  
AAATTACCCAGTTCCACATGATGCGGACAGCGCCAGACGATTCGTTGCATTCTGCAACTACTATAGACGTT  
TTATCAAAAATTTTGCCGACTATGCTCGTCACATAACAAGATTATGTAAAAAAGGTGTAGAATTCGAATG  
GACAGCTGATTGTCAGCATGCTTTCGAACATCTCAAATCGGCACTAATAAATCCGAATTTATTACAATACC  
CAGATTTTCAGCAAAGAATTTTGCATAATAACAGATGCAAGTAAACAAGCATGTGGAGCAGTTTAACTCA  
AAACAAAAATGGACTCCAACCTCCAGTCGCTTATGCATCAAGATCGTTTACTAAGGGTGAAAGTAATAAA  
AGTACAACAGAACAAGAATTGGCAGCAATTCATTGGGCAATAACTTATTTTCAGACCATATATTTATGGTA  
GACACTTCAATGTCAAAACAGATCACAGACCATTAACTACTTGTCTCAATGGTAAATCCAAGCTCAAA  
GCTAACGCGTATGAGACTTGAAGTAGAGGAGTATAATTTTACAGTCGAATATCTGAAGGGTAAAGACAAT  
TTTGTAGCGGATGCGTTATCAAGAATAACCATTCAACAGCTACAACAAATAAATGGATCAATAAAGAAAG  
TCACTACAAGATATCAAAGTAGACAAAATTCCTGCGCAGGAAAAGAAAAATAGAATTGCCATGGCAATCT  
ATAGAAAAAGCTTCAAAGCCCAACGTATATAAAGTCATTAAACAATGACGAAGTACGTAAAGTAGTGACCT  
TGCATGTAAAAAATATGCTATGTTTTTTAAACATGGTAAGAAAATTACTGCAAGATATGATGTTAGCGATT  
TATATACCAATGGAACCTTGACTTAGGTCAATTTTTTCCAAAGGCTTGAAACGCAAGCCGGTATAAATAA  
AATCAGCCAACCTCAAAGTGGCGCCGTGGGAAAATATCTTTGAACACGTTTCAATCGATAATTTCAAAAAT  
ATGGGCAATAAAATATTAATTTTATTGAGAGTAGCGCTACTCAACCCGGTGACCCAAATAGAAACAATAA  
AAGAAAAAGAAGCTCTATTGTCTACGTTCCATGATGATCCAATACAAGGAGGTCACACAGGCATCTCAAA  
AACCTTGGCCAAGGTCAAAGACATTATTATTGAAAGGTATGACTCGAGATATTACTGAGTACATACGA  
AAATGTCCAAAATGCCAAAAGTCAAAGTGACAAGAAAAATAAAAACTCCTTTAACAATAACTGATACG  
CCAATACACGCTTTCGACAGGGTTATAGTAGACACCATTGGTCCACTACCCAAGTCTGAAAATGGAAATG  
AATACGCAGTCACATTAATTTGTGATCTGACTAAATATCTAGTCGCGATTCCAATTCCAAACAAAAGCGCT  
AACACAGTAGCAAAAGCGATTTTTTGAGAATTTTATTCTAAAGTACGGTCCAATGAAGACGTTTATTACGG  
ACATGGGAACAGAATACAAAAATTCTATAATAAATGATTTGTGCAAGTATTTACAAATAAATAACATAAC  
ATCAACTGCACACCACCAGACAGTTGGAACAGTCGAAAGAAGTCACAGAACTTTTAATGAATACATA  
CGTTCATATATATCGGTTGATAAACTGATTGGGACGTATGGATCCAATATTTTCGTTTACTGTTTCAACAC  
AACCCCATCTATGGCACATGACTATTGTCCATATGAACTTGTTTTCGGTAAAACAAACAATTTATTA  
ATTTAATAGCACAGACACCATAGAACCCTTTATATAGTATAGATGATTATGCTAAGGAAAGTAAATATAG  
ATTAGAAATAGCATATAAAAGAGCTAGAATTATGTTAGAAGAAAATAAGAGAAATAATAAGGAATTATA  
TGATAAAAAAGTAATAAACATAGATATATCGGTAGGAGATAAAGTCCTACTTAAGAATGAAACAGGACA  
TAAGTTAGATCCAACCTTATTTAGGACCCTATACAGTAGAAAAGTTAGAAGATAACGATAATATAAATA  
AGGGATACTAAAAAGAAAAAACAAAAAGTACATAAGGATAGATTAAAAATTTTATAATAATTGAATTGAA  
AACTCTAATATAAACAAAGAAAATTGTTTCGAACAAAATAATACAAAACAATAAAAAAGGAAAATGGAATT  
TAAGAAAAGGAACTCAAAAAGAAAAGAAAATTTCTTTTCTTTTATAAAAAAAGAGACAACATTTAAAN  
AAAATACTAACACATACATATATTTTTTAAATACACATAGTTAAACATATACATTTACACATACATATTA  
CAAACATTTTTATATTAATAAATAATAACAAAAA  
AATACTTAAATAACTACATAAATTACGTTATTTTTNAAAGGAGGGAGATGTAGCATGCGTACATATGTA



TATACATACATATGAATAAGGCTGCAACACTTTGTTGTTATGCCAACAGAATGCAAACATAAGCAGCGAC  
TTTGTGCGCAGCGCGCCTAACGCTAAGTGCCCTCTGCGCATATTCAAGTGCAGACGAAATATGATCCGCACT  
TGATAACAACGACCGCCCAAATAGCTAAGTCAGCGTTCTCACGCTTGACCGTCGCTGTGTATACATATGTG  
CGCGCATGACTCTCTCTGACTCTCTTGCTGTATATAATAAGCCTAAAACCATGTATGTAAAACGGCTGCTC  
ACTGCTTCACGGTGGACAGCTCTAACTCCAAAAAACATTGAATAAAGAACCATCAAGGAAGACTGACGTC  
TTTTCATCAGGGACTATTATA  
>160\_rnd-5\_family-8838\_\_LINE\_\_R1  
ACACACACACACACACACACACACACACACATCACACCGTGTGGCAAGCGACCCACAGAATACTACC  
ACAGCTTGTTCATTGCTTGTCTGACGAGGCGACTGAAATGATACGGTGATGTAATTGCTCGGAGAGGTCCCT  
CTAGTAAGCGAAAAGATTCTGACTGCCATTAACCTGGCAATGGCCAGATCGATTCCGTTTCTGGGCAAGT  
AAAGCAACTTGTGACCTCCGGCAGTGGCCAGGTATCCCCTGGGTAGGCGCTGCACACCCGTGATGCGCCT  
AGCTAATACGAGAAGGCGACTAACATTGAGACCAGTAACGTCCTAAGTTGCACACTCTGGACGACTCTAC  
ACGACAAGACGACCCCTGTGCTGACGGCTGACAGTATTCTAGCATCTCAGTAAGCGGAGTGAAATCTGGC  
CGACAGGCCGAGGCGCTGAGGGGTCAAATCCAAACACTGGACATNNCCCCAGAAAATATCAGTCTCCGA  
AAGGCGTACGGCCAAACACAGACGGCGACGATAAANCTGCCAGCGGGAAGCGCGAAAAAGGCCCTTTCA  
GTAGGTTTCTGAAAGTAGGCTGGGTCAACTCAAGAATCCGCGAACGGATAAACATCACCAGATGTTTCA  
GATGCCTCGAGTTTGGACATCTAGCGAGACACTGCAAAAAGTGATCTGGACAGATCGAATGTGCCGACGAT  
GCGGAGGAAAGGACCATCTGGCTAAGGACTGCAAACAAGAGCCACAGTGCATGCTGTAAGGAAAGGAAT  
GCCGACAGAAAATGAAGTGGACACAGCTGAACCTCAACCACTGCGAGGCTGCTCAGGCTCTACTGACACA  
ATCAATACGGGAGAGAAATACGGACGTCGCAATAATCTGCGAGCCATACAAGCCTATCGCTGGAAGTGG  
CTGGGTGGCAAGTAAATGTGGAAGGCGGTCATTTGGTCTCTCAAATCACCGGTCCAGGAGGTCAGAGCA  
GCAAACGACGGATTCTGTGAGAGCAAAAATTAATGGAATCACCGTTTACAGTTGCTACGCACCCCAAGCTG  
GGAAGTGCAGCAATTTACAGACCATGCTGGAAGAAATTTACAGAAGACGCTCGCTATAGAGATCCTCTCGTC  
ATAGCCGGAGACTTTAACGCCTGGGCCGTGGAATGGGGAAGCAAGGAACTAACGCGAGAGGGACCACC  
CTGCTAGAAGAGTTCGCGGCGCTCGACTTGGGCCTTGCAAACGACGGGCAGGAGCTCACGTACTGCAAGG  
CCGGTAGAGGCTCTATTATAGACCTTACCCTGCTCAGCAGCTCACTNTATAGGCTAACTACATGGAAAGTC  
AGTAATGAATTCACATTCAGCGACCACCGAGCAGTGCATTTTCGAGATCCACGGGAGAGGACGGAGAAAA  
CAGCAGCCCAAAACAACAGGCCCCCAAATGGAAGGACAACGGCCTAGACGAGGAAACCTACACGGACTCC  
TTACGTCATGCTCAATGGACTTGGGCCACGGAGTTAGCAAACGACATGGCGTGGCAGCTCATGGAAAACA  
TCTCGGATGCGTGCGACTTATCCGTGCCCAGGAGGATGCCAAACAAAAGAGGAGTACCTTGCTACTGGTA  
GAATGAGCAAATCAGCGATCTAAGGAAGGCCTGCCTGCGTGCTAGAAGGCGCTCTCAGCGTGTCCGAGGC  
CACCCAGACTTTGCATCTAGGCTGGAACACCTGCGTGCAGCCAAGCGAGACCTCAAGAGTAGTAGAGATA  
CAGCCCAATCTGCCTACTGGACACGGTGGGAAAGGTACTGGAGACGATTGTATATGAGCGATTTCTTAGT  
GTCGTCGAAGACAAAGAGGGCCCTGTCCAAACAGCAATACGGATTTTCGAATGCAAGGTCTACGGTCGATG  
CAATTAAGGCGGTGGTAGATATTGCCGCTAAAGAAATAGAGGGAAGCAGATGGAGGTGGGGAGATAAGG  
AGACTTGCGCGATGATTACGTTGGACATCCGCAATGCCTTTAACTCAGCATGCTGGTCTCGTATACGGGAA  
GCCCTAGACCGAATAGGGATACCGTCCCTCCGCTTTCCGTATAATATCCAACCTACCTGTCCGATCGGGTATT  
GAGTTATGATACGGATGACGGTGCTAGGAGTTACACGGTCTCAGCAGGGGTCCCACAGGGTCCGTCTGG  
GACCACTCCGGTGGAACATAATGTACGACGAGGTGCTCAGAGTGCAATTGACCCAGGGATGCAGAATCAT  
AGGGTTTCGAGATGACCTAGCTCTAGTAGTGGTGGGCAAAGAAATAGAAGACGTGGAAGCGGCTGCAAA  
TGAACCCATAAGAATCGTGGCCAGCTGGATGCGTGGCGCTAGCCTGGAGCTGGCAGGCTATAAAACAGA  
GGCGGTCTCATCACAATCCACAAAATAGTCGAGTTTGCTAGATTTAGGTAGACAGCGTTAGTAGGGTG  
ATGTTAGACAGTAGGCTTAGCTTTGACCGCACGTAGATTACGTTTCGCCAGAAAGCAGCCAAAATGCAGG  
CGGCCCTTTTCGAGGATGCTACCCAACATAGGAGGAGAGAGTTGTAGCCTCCGTGCTGCTCTATGCTGCAC  
CGATATGGGCTTCAGCGGTTGCAAGCCAGAAAGGCCTCCGGAGGAAGATGTCAATCCCCTATAGGCTCAG  
TGCTTTGCGCACCATTTCTGGATTCCGGACGGTGTCCGACGCCACAGTATTGGCAGGAAAGCTGCCAGTA  
GATATACTGGCCAAGGAAATGGAGAACATTTACATGTTCCGAATATCCACGGGAGACGCCGTCTCAATCA  
ATGGCAACTTGGCAGGAGAGATGGAACACGGCAAACAAGGGGATATGGACACATAAGCTGATCCCCAAT  
CTGGAGCAATGGATTAGGAGCAGAATGGCGAAATGAACTTCCACCTAACACAGTTTTTTTACTGGACACGG  
CGGGTATAGGAAGTATCTCCATAGGTTTCAGGCATGAGGACTCTCCAGAGTGTCCGAAGTGGCCAAATCCG  
GACGAAGACCCGGAACACGTGCTGTACCAATGCTCAAGGTACAGAGAGGTAGTAGGCTCTGTACCTCCAC  
CGGTAGGGACTGGGAGCGTTTCATGCTGGAAGGAGAGGACAAGTGGAGAAATATAAGTCAGCTCATAATA  
GGCATCTAGAGGGATCTGAGACGATGCGAAAAGGAGCGACGACTAATGGATACTGCCTAAAATAGGCAA  
CCCATCCCCGCGAAGTAATACTTTGCGGTGATCCCCGCGCAAATGTGGTGTGTAAGTGGGGGGTGAGTTT

AGTACGTAGGTGCTGACGGAATCAGCAAATCGTGCATACGGAGATTTTCACCTCCGTGCCGTAAGCAAAA  
AAAAAAAAAAAAAAAAAAAAAAAAACACACACACACACATACGACACGACTACGTCGTTTGATAGAGTGCGG  
ACGCGTTATTAAGTCCACTCGAAAAATAAACAAATCGGTAGTGAGAGGCACGCTCGAAAAGATGGGCTT  
AGTTCTAGACATCATATTCGAATGTGGAAGGTTCTCAGCGAACAGGCAGGAAGTGGAGGACAGCTTGGGG  
AGACCTATCACGGTGGACAACCTTGGTCAGGAACATGTTGGAACATGTTGGAGAACGCACAAAAGTTGGGA  
AGCAACCTGCACTTTGCAGCAGAAGTGATGCTGGAACCTCAGGAGAGTTGAGCGCAATAGACGGAGAGCG  
GAGGAAGTTTAGGTAGCAAAAACATGCCTGTGAAGCTTCGCGGCCGATCCGCAGGCAATCTACGCTACCT  
AATTCACCACGTAACCCCCCTTACTATGTACATNCTTAGCATAANTTATNTATTATNACATNCNTATATN  
CGTACAAATACACATACACATACACATACACACACACACACACATACACACACACACACACACACAC  
ACACACACACACACACACACACACACACACACACAGCCCCGTGTGGCAAGCGGCCACAGAATACTACC  
ACAGCTTGTTCATTGCTTGTCTGTACGAGGCGACTGAAATGATACGGGGATGTAATTGCTCGGAGAGGTCCC  
TCTAGTAGGCGAAAAGATTCTGACTGCCATTAACCTGGCAATGGCCAGATCGATTCCGTTCTTGGGCAATT  
AAAGCAACTCGTGACCTCCGGCAGTGGCCAGGTATCCCCTGGGTAGGCGCTGCACACCCGTGACGCGCCT  
AGCTAATACGAGAAGGCGACTAAGACTGAGACCAGTAACGTCTTAGGTTGCAAACCTCTGGACAACCCTAC  
ACGACAAGACGACCCCTGGGCTGACGGCTGACAGTATTCTAGCATCTCAGTAAGCGGAGTGAAATCTGGC  
CGAAATGACTGCTAGGTTAATGCTGTTACCGCCCCCGTCCCGTTAAACATGGCAAATCTCCTAGCACGCT  
CCTCGAATCGTCGCCATTTAGTTGGCAGTATAGGTTTACAGATGTGATATTCCTGATTAACGCGGATCTGGCT  
CTGAACACCCGACCCCATGAAGGCGGGTGTCAACCCTCGCATGGCCTCACTGCTTGCAAAGACAACCATG  
AGATCTAAACGCGACTGTACAACGACCAAGGACAACGGCCTAGGAGTTGGGACCCAATAAAATGAGTAA  
CAATGAAACCCCAACAAACGAAGGAGAGCTGTGATGCTTTTGCAAAGAGCAGCAGAATGGCGAGATCACC  
ACTAGGTGTTCCAACAGCCGCCCGACAGAGACGAACTCAGAACGGGAGCCAANGACGGCAAACCCAGAG  
CAGCTCAGCACTACGAGAAGTCCGGCAGGAGATCTCAAAGCTGGTAGTCATGCTCGAAGATGGCAAGCG  
ACGCTCCATCCACCAGCCAATGCGAGACTCGATAGAGAGCATCAGAGTGCTCTACGAGCTGGCGGCAATC  
CAGCTGCACGACGAAGGAGCCAAGGAGATCATCAGGACGCACCAGTCGTCCACCATCGCCNCTGTTTCAGG  
ACGACGATAGACGTCAAGCGGAAGCAGGCCACAGCACGGACACCACAAACAAAGCGAATCCGAGGACC  
AGCCGGTAGCCAGGCTACCGTATCAACGGCGCAGGAGACACCGAGCCCCAAAGCGGATGGCGACAAGTG  
GAAGGAGGTCACATACAAGAAAAGGAAGGAGGTCACCAGGAAAAACAGCAAGGGATTGCTCAAGGAAA  
AGGCGCGACCGGATGCTATAGTCATCTCGGCAAAAGGCGAAGCGAGCTACTCAGAGATACTGAGGAAAG  
TAAAGCGGACGAAAAACTGGGCGAGCTCGGAAAAGCGGTGACAAGAATAAGGAGGACACAAAAAGGAG  
ACCTACTACTCCAGCTNAACCACTCGGGAGAGAATACCATAGCATTTTGAAACCTGGTAGGCGAAACGTT  
AGGCGAAAATGCAGAGGTCCGGACGCTGTCCCACCGAGTGACCGTTGAGTGCAAGGACCTGGACGAGAT  
CACGACCAGGGAGGATATCTGTGAGGCGCTGAGGGNTCAAATCCAAATACTGGACATAGCCCCTGAGAA  
TATCAGCCTCCGAAAGGCGTACGGCCGAACACAGACGGCGACGATAAGACTGCCAGCGGGAAGCGCGAA  
AAAGGCCCTTTCAGTAGGTTTCCTGAAAGTAGGCTGGGTCAACTCGAGAATCCGCGAACGGATNAACATC  
ACCAGATGTTTCAGATGCCTCGAGTTTGACATCTAGCAAGACACTGTAAAAGTGATCTAGACAGATCGA  
ATCTGTGCCGACGATGCGGAGGAAAGGACCATCTGGCTAAGGACTGCAAACAAGAGCCACAGTGCATGC  
TCNGTAAGGANAGGAATGCCGACTCCAAACACNTTGCCGGCAGCGGCAGATGCCCCGTGTTTAGGAGCNC  
CCTGGCCAACAGAAAATNAAGTGGACGCAGCTGAACCTCANCCACTGCGAGGCTGCTCAGGCCCTGCTGA  
CGCAATCAATACGGGAGAGCAATACGGACGTCGCGATAATCTGCGAGCCATAACAAGCCTATCGCTGGAA  
GTGGCTGGGCTCGACTTGGGCCTTGCAAACGATGGGCAGGAGCTCACGCACTGCAAGGCCGATGGAAGCT  
CTATTATAGACCTCATCTACATGAAAAGTCGGCAATAAATTCACATTCAGCGCCCACCGATCAGTACATTC  
CGAGATCCACGGGAGAGGACGGAGAAAACAGCAGCCAAAACAACAGGCGCTAAATGGAAGGACAACG  
GCCTGGACGAGGAAACCTACACGGACTTCTTACGTCATGCTCAATGGACTTGGGCCACGGAGTTAGCAGA  
AGACATGGCGCGGCAGCTCATGGAAAACATCTCTGACGCGTGCGACTTATCCATGCCAGGAGGATGCCAA  
ACAGAAGAGCAGCACCTTGCTACTGGTGAATTATCAAATCAGCGACCTAAGGAAGGCCTGCCAGCGAG  
CTAGAAGGCGCTCCCAGCGTGCCCGAGGGCCACCCAGACTTTGCATCTTTACGTCAGCCAAGCGAGACCTG  
AAGAGAAGCATCAAACAAGCAAATCCAGCTACTTCCAGAAAATATGCGATGAGGCCGATGTAAACCCGT  
GAGGCACGACATACACGGTCGTCACGTAGAAGATCCGCAGCCAGGGAACAACACGGGTTGTTTCTGCCCT  
ACCCCACTTGCCACTAAGTAGTGACGAGATATCGGTAAACGAGTGGAAGTGGTAGCGGCAAGCAAAA  
ACTAGGCGACAAAAACGCCAGATAGAGGACCTGATGGAGTGCAAAACGAGGCGCTAAGGTTAGCCATGC  
TAACGAAACCCGACGCCTACGCCGAGACATATACTAGATGTCTACATGACGGTGTATCCCTAAGAGATG  
GAAGCGGCAGAACTAATCCTTCTACCGAAAGGGGACAAGCCAATAGAGGAACCCCTCGGGATACAGGCC  
AATCTGCCTACTGGACACGGCGGGAAAGGTACTGGAAAGGATTGTGTATGACCGACTACTTAGTGTGCTC  
GAAGAGAAAGAGGCCCTGTCCAAACAGCAATACGGATTTGCAAGGCAAGGCTTACGGTCGATGCAATT

AAGGCGGCGGTAGATATTGCCGCTAAAGCAATAGAGGGAACCAGATGGAGGTGGGGGAGACGAGGAGTAT  
TGCGCGGTGATTACGTTGGACATCCGCAATGCCTTTAACTCAGCAAGCTGGTCTCGTAANCTGGAAGCCTT  
AGACCGAATAGGGATACCGTCCCCCATTCTCCGTATAGTATCCAACCTACCTGTCCGATNNGGGTATTGAGTT  
ATGATACGGATGACGGTGCTAGGAGTTACACGGTCTCAGCAGGGGTCCCACAGGGGTTCGGTCCTGGGACC  
ACTCCTGTGGAACATAATGTACGACGAGGTGCTCAGAGTGCAATTGCCCCAGGGATGCAGAATCATAGGA  
TTCGCGGATGACCTAGCTCTAGTAGTGGTG  
>9\_rnd-1\_family-297\_\_LTR\_\_Gypsy  
TGTAGCATGCGTACATATGTATATACATACATATGAATAAGGCCGCAACACTTTGTTGTTATGCCAACAGA  
ATGCAAACATAAGCAGCGACTTTGTGCGCAGCGCGCCTAACGATAAGTGCCCTCTGCGCATATTCAAGTGC  
AGACGAAATATGATCCGCACTTGATAACAACGACCGCCCAAATAGCTAAGTCAGCGTTCTCACGCTTGAC  
CGTCGTTGTGTATACATATGTGCGCGCATGACTCTCTGACTCTCTTGCTGTATATAATAAGCCNAAAACCA  
TGTATGTAAAACGGCTGCTCACTGCTTCGCGGTGGACAGCTCGAACTCGAAAAGAAAAACAGATAATAAA  
GAACCATCAAGAAAGACGGACGTCTTTTTTAATCTTGGAACCATTACATGGCGACCGTGACAGGACGTCAC  
AAAACATGAAAACGTTAAGATACATAACTTCAACTCTAATTTTTAAACCAGTCATAAAAAGTAATTAAAGGA  
AGTAAATTTAAAAGGAAATAACACTCAAAACAACCTGAAACAACGAAGCATCTGGAACGGCACACACCCTG  
GAGAATCAAAAATTAAGTGAAGTACAGGGGGCATGAGCTCTAAAAATACTTTAAAGCTAAAAAGGC  
GCAGTGGCATTAAAGAGCGGATCAGGCAAAGAAAGTCTGAGATCGTAAGACTCTTATATAAGTCCCAA  
ACCCAATACCTTGGGAAACTGCAGTCAAGCTACATGACGAACTCAAACATCTTGAGTCGTTAAACAAAGT  
AAAGAGCCCCCTGTCCCTCAGAGGAAAAACTTATTAATCCAGNTNCACATCGACCACAGCCACAACCGA  
TCCCGAGAAGGCAACGTGAATGCCCAGCAGACTGCGAGGGACCGCTTTACAGCCAACATTGCCTGGGCAC  
ATGTCAGCGGCCACCCACGAGTAAAAACTAGTACGAGAGGCAAACCGCCCCCTTGTAACCAACGCTGGAAC  
AAGAAGAAGTACGAGAGGCAGACCGCCCCCTTGTAACCAACGCTGGAAAACACCAAGGGTGAAGTGAACCGA  
CAGCGCCACAGAGGGCGCACAGCAAAAAAAAAATTTATAATTATAATTATTATTTAAATATTTGTAAACT  
ATTGTAATGCCCCGACGACAATTGAGTCGACCGGCAAGACGTTTGGCCCGTAAAGCCATTTCGAAATACTAG  
GCAGGACAAAATGTACATTCAGTAAAAACCGAATTAATATTAAATTTCTCCCCGCCACGGGCGTAAATA  
CAAAAAATTTTAAATATAAACTCAAACCTTATAAAGTTAATGAATAGCGTTAACAAAACCTATA  
AGTTCATATATAAATCAAGGACCCAAGTATATATTAAGAATAACAACCCCAAATATGGGTTTGGTAGACG  
TTAAGACTGTTGACTCGACGGCTAACGTAATAAATAAAGTTGAGGTCAGCAACACAGATGTAAAATTGAT  
AACAAATTTTGTGCTTATGATATTTGTCATATTAGTAGGACATCTATTGTACAAATTATATACGTATCATAA  
TAAATGCATNAAAAGAGATACCAGAGTCACGCAAATGACCTGGATAAAATCTAAATTTTTTCTTGAACAA  
TGATAAGCGACAAAATAAAATAAATAAATAAATGAAATTTTCGAGAAATATATATATATTCTTATTACCA  
GAAATGCCTATTAATAAGTTTTCGATAGAAGTATACTTAGAAGCAATATATAATAGCGACGCAGACTTTA  
GAATTCGTGCATTGAATATTCTACAACAATAAGATAAAAGGCATAATTTTAAATACACTGCCATATGTTGG  
CATTAAAGAAATAGTGGTCCAGTGGACGGCGAGTGCCCAATTATAATGGTAAACTTCATAAATAGAGAA  
CTATGGAATGGAGTGAATTAGCGAAAAAAATAAATAATTTCAAAGATAAATTCGAAAAATCTTATAAGTG  
TGTTAATAAGAACGCACCTATAAGGGTTGAAACGCTAATTCACCACATAAACATATTAGTGCTAAACTAT  
AATAACATAGTTCAACTTTATTTAAGTAAAGAAAATAGGCTTACAGAGCAGCATGTAAATCAATGTAAAG  
AAATAATCAAATCACTTGGGACTAGAATATCGAATATCAGCACTAGGCACAACATAGTAATAGATATCCC  
AACAGATTTAAAATTAATGGCAACTTTTGAACCAGATCAACTAGAAGAACTGAATGAGTCTAAGCCAACA  
CTAAATAGTGACCCTGATATTGAAGCTGATAGCGACATTGAGCCACTTGAATTAACAGAACCAACATGG  
CAGTAAATCAAGTGCCCTTAGACCGCGAATATGTAAGACAGGTATCGTCTACAATTCCGGAATTTGATGG  
CAAAAGCTATCACTGGCCAGATTTCTAACGGCTTTAAGACTAGTCGATCGTACTAAAGGTACACAAGAAG  
ACTTAGCCGTAGAAGTCATAAAGTCNAAAATAATTGGCCCAATTTTGTACAAAGTACAAAACGAAACATC  
CATTATTGGTATTATAAATAAATTAATACCAATATCAAAGGCGAGTCAACTGACGTTATCAAAGCTAAG  
TTGCTTAACGTAAAGCAGAAAGGCAAGTCAGCCTCGCAATATACAGCTGAAATCGACAGTTTGCCTAAGC  
AACTGGAAGCAGCCTATATTGACGATGGACTAGATTTTGATAACGCAGAGAAATTTTCTACTAAAGAAAC  
AATATCTGCCATGACAAAGAATTGCGAATACGAAAAGCTTCGCATAATATTAGAAGCGGGCAATTTTCAGC  
AATTTCAATGATGCTATGGGTAAATATATCCAATGCAGCACTGAAATGACTGGAAGTGCCCAAGCACAAAT  
ATTGTACTACAAAGGCAGAAACGATCGTGGAATTACAGCCGTAACAACCAAGAGGTAGAGGCAATAG  
CCGCGGTAATTTCCACTATAACGGTAATANAACAACAATAGGGCAATGGCAGAGGACATTATAGAGTAAT  
GCCCCGTGGTGGCAACCGAGGAAGGAACAATTCNAACCGAGGTAGCNACCAAAAATAGTAACAATAGAGG  
TAATGTCCGAGTAACTGAAGGTAACCTCGGAAAACCAACGAGACCCCTCAGATGTTTCAGAGCCAATAAATG  
GCNCAATAAAAACCATCAACCTCAACCTCAGCATGTTTGTAAAAATTAAGAATGAAAGAACAGGTAAATC  
AATTGCACTGTTGGTNGATACTGGTGCAGATATATCCATATTTAAAGAAAATGCAGATATATTCGAAAAC

GTAAACGAAAGAGTTACTACCCAAATATCGGGNATTGGCGAAGGCACAATTCCTTCAAAAGGCTTAGCCT  
TTATAGAACTCACTACAGGCAAATATATAATTCCGCATAACTTTTCATTTAGTCGANCAAAANTTCCCAATA  
CCGAGTGATGGCATACTAGGCATAGATTTTCATAAAACAATATAATTGCCAACTAGATTTCACTCAAAGTG  
GCGACTCACTTATTCTTCGCCCAAACAACCTTAAATTATCCGATTCGATTAAAAATACTTCATACTTGTGAC  
AATAATGCCACAGTACTCCCAGCTCGTTCCGAAGTTGTCCGTGAAATACAAATNCCCTCAATACAAAATC  
AAATTCTTATATTAAATCAAGAAATTGATGAAGGAATTTACATCGCAAACACGATATCCAACCACAAAAA  
TACATATGTCCGTATTATAAATACAACAAATGCCAATAAGATAGTAAACTTAAATAAAAATAAAATATGAA  
ACTTTGAACAATTATGATATAGTAAAAGAAACCAACGAAGGAAGAGACAACCTTCGTTATGGAAAAATTA  
ATCAAAAACCTTTCCGCCTTTATTTAAAAATCAATTAAGATTTATGCACCAGATATACCGACATATTCGG  
ATTAGAAACCGAATCGATAACAACCTAATAATTTTACAAGCAAAAGCTTAGATTGAAGGATGATGAGCCCG  
TATACATAAAAATTATAGAAGTCCTCACAGCCAAGTACAAGAAATTCAAGCCCAAGTGCAAAAATTAATA  
GACGACAAAATAGTCGAACCATCAGCCTCAGAGTATAATAGCCCACTTTTATTAGTTCCGAAGAAGTCCC  
TTCCGGACTCTGACAAGAAGAAATGGCGATTAGTAATTGACTATCGTCAAATTAATAAAAAGCTATTGTC  
CGATAAATTTCCGCTACCGAGAATTGATGATATTCTAGATCAGCTAGGTAGAGCAAAATATTTTTTCATGCC  
TAGACTTAATGTCTGGCTTTTACCAAATCGAACTCGAAAAAGTTCTAGAGATATAACGTCATTTTCAACGA  
GCAATGGCTCGTATCGCTTTACGCGATTACCATTTGGCTTGAAAATAGCCCCAACTCCTTTCAAAGAATG  
ATGACAATAGCATTCTTCTGGTCTCGAACCATCTCAGGCCTTCCTTTATATGGATGATCTGATAGTAATCGG  
TTGTTCCGAAAAACATATGGTCAAAAACTTAACTGAAGTTTTTGACAAATGTAGGAAATTCAACCTGAA  
ACTACATCCAGAAAAATGTTCATTTTTCATGCATGAAGTCACATTTTTGGGACATAAATGCACTGATAAAG  
GAATCTTGCCAGACGACAAAAAATACGACGTCATAAAGAACTACCCAGTCCCACATGATGCGGACAGCG  
CTAGGCGATTCTGTTGCATTTTGCAATTACTATAGGCGCTTTATTAATAAATTTTGCCGACTATTCACGTCACA  
TAACAAGATTATGTAAAAAGACGTTAAGTTCGAATGGACATCTGAATGCCAGAATGCCTTCGATCACCTC  
AAAACGGCTCTTATAAACCCAACCTTGTTACAATATCCAGATTTTCGCTAAAGAATTCTGCATAATAACTGA  
TGCAAGTAAGCAAGCGTGTGGAGCGGTTTTAACTCAAACCATAATGGACTCCAACCTTCCAATTGCATAC  
GCATCAAGATCCTTTACTAAAGGAGAAAGTAACAAGAGTACTACTGAGCAAGAATTAGCGGCTATTCATT  
GGGCAATAACGCATTTCCGACCATATATTTATGGTAACCATTTACGGTTAAAACTGACCATAGACCGCTA  
ACCTACTTATTTTCAATGGTAAATCCAAGTTCAAAATTAACACGTATGAGGCTTGAATTAGAGGAATATAA  
TTTTACGGTAGAATATCTGAAGGGTAAAGATAATTTTCGTAGCCGATGCGTTATCAAGAATAACCATAAAA  
CAGCTACAAGAAATAACAGGGACAATCCACAAAGTCACTACAAGATATCAAAGTAGACAAAATTCCTGC  
GCAGGAAAATATCAGGTAGAATTGCCAAGGCAATCTACAGAAAAAGCTTCACAGCCCAACGTATACGAA  
GTCATTAACAATGACGAGGTACGCAAAGTAGTGACCTTGCAATATAAAAGATACGCTTTGTTTCTTTAAACA  
TGGCAAGAAAATTATTGCAAGAATTGACATTGGTGATCTATATACAAATGGAAATATTGACTTAGGTCAA  
CTATTCCCAAGGCTCGAAAATGAAGCCGGTATATTGAAAATAAGCCAATTGAAAATGGCACCGTGCGGAAA  
ATATCTTTGATACAATTTCAATAGATAATTTCAAAAATATGGGCAATAAAATATTGACTAAATTAAGGGTA  
GCGCTACTCAACCCGGTGACCACAATAACAAATAATAAAGAAAAAGAAGCTATATTGTCTACACTACATG  
ACGACCCAATACAAGGAGGTCATACTGGCATTACAAAAACCTTGGCCAAGGTCAAACGACATTACTTTTG  
GAAAGGTATGACTCGAGATATTACTGAGTACATACGTAAATGTCACAAATGCCAGAAAGCTAAAATAACT  
AAGCATAGTAAGACCCCATTAATTATAACTGATACACCTGTACATGCGTTTCGATAGGGTTATAGTGGACA  
CAATTGGTCCGCTACCCAAATCTGATAATGGTAATGAGTACGCAATCACATTAATTTGTGACTTGACTAAA  
TACCTAGTCGCGATACCAATACCAAACAAAAACGCTAGTACAGTAGCCAAAGGTATATTCCAATCTTATA  
TTCTAAAGTACGGTCCAATGAAGACGTTTATTACGGACATGGGAACAGAATACAAGAACTCAATTATAAA  
TGATTTGTGCAAGTTTATGAAAATAGACAACATAACATCAACTGCACATCATCACCAGACAGTTGGAACA  
GTCGAAAGAAGTCACAGAACTTTTAAACGAATACATACGATCTTATATATCAGTTGATAAACTGATTGGG  
ACGTATGGCTCCAATACTTTGTCTATTGTTTTAATACGACCCCTTCTACGGCACATAATTATTGTCCGTATG  
AATTAGTATTTGGTAAGACATGTAATCTACCAAATACTTCAATAGCATAGCAAACATAGAACCAATATA  
TAACATAGATGATTATGCTAAGGAGAGTAAGTATAGATTAGAAGTAGCATACAAAAGAGCAAGAAATAT  
GCTAGAATTAATAAGATGAAACAAAAGAAGCGATATGACTTAAATAGTAAGGAATTAATAATTATCCAT  
AGGAGATAAGGTTTTTATTAATAAATGAAGTAGGACATAAACTAGATTTTNAATAACACAGGGGCCCTATAG  
AGTAGAAAAAATAGAAGATAGGGATAATATAGTTATTTCCGGAAATAAGAATAAAACGCAAACAGTCC  
ATAAGGACAGATTAAAAATTTTAAATTCATAATCAAGCATGCAAAAATACATGAAAAAATATATATAAA  
AAAAAATAAATAAATAAATAAATAAATAAATAAATAAATAAATAAATAAATAAATAAATAAATAAATAAATA  
ACTCCATTGTATTACGTTATTTTTTTTAAAGGAGGGAGATGTAGCATGCGTACATATGTATATACATACAT  
ATGAATAAGGCTGCAACACTTTGTTGTTATGCCAACAGAATGCAACATAAGCAGCGACTTTGTGCGCAGC  
GCGCCTAACGNTAAGTGCCCTCTGCGCATATTCAAGTGCAGACGAAATATGATCCGCACTTGATAACAAC

GACCGCCCAAATAGCTAAGTCAGCGTTCTCACGCTTGACCGTCGCTGTGTATACATATGTGCGCGCATGAC  
TCTCTCTGACTCTCTTGCTGTATATAATAAGCCAAAAACATGTATGTAAAACGGCTGCTCACTGCTTCGCG  
GTGGACAGCTCGAACTCGAAAAGAAAATGAATAAAGAACCATCAAGGAAGACGGACGTCTTTTAATCTT  
GGAACCATTAACAAT

>160\_rnd-1\_family-291\_\_LTR\_\_Gypsy

ATATATAAGTTAACACATAACACTTAATATAGGATATTTTCATAAGTTATAATCAACCCTCGCTATCGCGTG  
CTTCATAAGTTAAGGAACAGCCCCCGCAATTGCGGACACTGCATACTTTGTATCAGCGCGCAATAGCTGCA  
ATGGTCAGCGGCGGTAAACCGGACACTTTTGTTTTGCTGCAAGAGTTTCCGTTATTGCCTAAGATTTTGCTG  
AGTCGGCTTGCCGACCATGACATTGTGGCGTGATGCGAGTTTGGCTTAGCTTAAGTAAACTTTCTGTGC  
ATTAAGTTTCTTTAGTTTTGAATTCGGCGCTCTTCCAATAAGTCGCTTAAATAAATATTTCACTCCGGCACTT  
AGCCGTTAAATAATTTGTTTTATTGTCTGAGCCCGAGGCCAGCAATAAGAGGGCGCAGTCGCCTCTCAACCT  
AATCTTCAGCCACTACAGGACTGAAGGATGTTAATTGGCGCCCACTAGTGGTCGGACTCCACAACCAAA  
ACAAGTAAAACGGCAGCGCAGGAGCTGCAACAACCAACAACAAATTAAGACAGCAGCGCGGGAGCTGCAA  
CAACCAACAACAATTAAGACAGCAGCGCGGGAGCTGCGAGTGACCAATTTTATAAAGAAAATTTTTTTTG  
TGTTAATTGAATCATGTAAGTGGATACTCTAGCCAAAATTTTTCTTCAAACACAAAATTTTTTTTTTATTTTA  
TAAAAATTAGTTAGTACTAGTGAGTATTTTATATTGCAACAGATCATACAAAAAAATTTTTTTTTTTAAATA  
ATAATAATCAGAACCAAGTTTCTGAAACACGTGAGAGTGACTGCTTTGAGAATTTTAGTTGAAACAATTT  
ATCATCCAGATCGTTAATAAAAATTACTTTGTGTTACTTTCTATGTGTCTAAAATTGTGCTATAACAATACAT  
ACAGTTCTCGTGGTTCAGAGCTGCGACGTAATTCGACCCATCTTTTGACGGCCCGTTTTATTTTTTCGCGGCC  
ACTGGCCTGCGCATGTCACGGTTCAGCCAATATAGAAACCTCGCAAGCAGTCTAGCGACTCAGATTCCG  
ACTGTGACATTTCGCATCAGAGTCCCGGCTACAAGACTTCTCCCTGCAGTTCCCCCACCATCAGGTAATAATG  
GATCCAGATCAGCTTAGGGAAGTAGTAAGGACGGCTATCAGCAATGCTTTAGCCGAACAGGCCGCTGCAA  
ACCAGCAGAGGGAGCAAGCGTTGACTCAAAGAATTAATGAGTTAGCTGAACAAATAGCAGCAGCAAACG  
TTGCCGCCCCACAAGTAGTAGCATATGCTGCTATAGGAATTAGAAACGACATTCGCTGTGACGAGCCGCT  
AGATGCCGTCAAGTGCTTACCTGAGTTTGCAGGAGTACAGGAATCTTATGTATCTTGGAGGCAGGCAGCA  
TTAGCCGCTTACGAGATCTTCAGACCACATAATGGCAGTTCTCGTCATTATCAGGCTGTTATCATCATAAG  
AAGCAAGATTAGGGGCCCCGCAGACGCGGTGCTGGCCTCATTTGGTACTGTATTGAATTTTGATGCGATA  
ATAAATCGCCTAGATTTACATACAGTGACAAGAGACCAATTCATGTATTGAACAGGAATTAGGTACCT  
TGAGGCAAGGTGGCCTGTCCCTGCTTCAATATTACGATGAGGTAGAGAAGAACTCACTCTTCTCACTAA  
CAAAGTTAACATGTCATACGAGCCGGCTTTAGCAAAGGGGCCTATGTGAAAAATTCCGCGACGATGCGTTG  
CGTGTGTTTCATATCGGGTCTCAAGCGCAGTCTTACAGATGTGCTCTTTGCAGCAAAGCCCAGAGATTTGCC  
TTCAGCGCTAGCTCTCGCGCAAGAAGTCGAGTCAAATCATGAAAGGTACGCATTCGCGGCTAATTTGCGA  
AGAAGTCTAGAAGACAAAGAGCGCAAGCCGCATGCAAAAGCGCAGGGTCACCAACAGGAGAGGCATTG  
CAACAAGCCGAAGCACAAGCTAGCGGTACAAAGAATCCGCACCTTTAGCAAGCAAAGCAAGGCCCCAGTG  
CAGACTGACCAACGAAGCAGCAGGCAGCACAAATAATAATGGCGCACCGGTGCCCATGGAGGTGATCCT  
TCCTTCTCAAGGGTCTTGACGCCCACTCAGGCCCTGCTTACGCGAATAGGAAGCACCCCGCATCTGACCG  
CACAGGCGGTGAGAGAAATCAGCAGAGGTTGAATCACGTACGCAAGACGCGGGACAGGGGGCAGAGGC  
GTATGCTGATGCCGCTCCAGCGCAGCGGCACAAATCAATGACGATGCTAGTTATGACTCTGATGCCCTC  
AATTTTTTTAGGAGCAAATCCCTGCTACCCGTCATCAGACGAAGAGTAGTAGGGACTCACATGCGATTCCCTC  
ATAGACACGGGCGCGGCCAAGAATTTTATTGCGCCACATGAAGGGTTGACCGTCCGCTCGGTAGAGTCCC  
CCTTCAAAATTCATTCCATTACGGCGAGACACAAATTACACACAAATGCTTTGTTTCAATGTTTGGGTTA  
AAGGCAACCTTTTTTTATTCTGCCGGACTTGTCAACTTTTGATGGGATTGTAGGCCTTGACCTGCTAAAGCA  
GGCAGCTGCTTCGCTTTGTCTAGCTTCAGGACAACCTTAAGTGGGGTACGGAGGTGCAACGAATCACCTTCC  
ACACGTGCAAAAATGTAAATTTACAAATGTAGACTGTGCAGAGGCATCCCCATTAGCTAGAAGTTCTTTT  
TTGAAAATGCTAAAGACCAGACAAAAGGCCCTTGCAGACCCAGACGAGGCGTTGCCGTATAACACATCAG  
TCGTGGCTACCATTAGGACCACAGATGAGCAACCGATCTATGCCAAGCTTTACCCATATCCAATGGGAGC  
AGCTGATTTTCGTTAATAAAGAAATCAAGGATCTGCTAAAAAATGATATAATTCAAAGTCCGTCTCTCCCT  
ACAATAACCCAATATGGGTAGTAGACAAGAAGGGCACTGATGAAGCAGGCAATAGGAAAATGAGGTTGG  
TAATGGACTTTCGTAAACTTAACGAAAGAACCGTGCCTGACAAATACCCTATGCCAAATATATCAATGAT  
ATTGGGGAATTTGGGGAGAGCCAAATCTTTTCAACATTAGACCTCAAGTCTGGTTATCACCAGATCATA  
TCGCTGAACGCGACCGTGAAAAAACCTCTTTCTGTGAACGGGGGGAAATACGAGTTCAAAGACTCCC  
CTTTGGATTAAAGAATGCAGCAAGCATCTTCCAAAGAACCATCGACGACATACTGCGAGAGCAGATTGGC  
AAATCTTGCTATGTTTATGTGATGACGTAATCATCTTTTCAGAAGATGAGGAATCCACATTAAACACGT  
GGATTGGGTCTTAAAAAGCTTACACGAAGCAAACATGAGGGTCTCCGTGCAAAAGTCACGTTTTTTTAAG

AAAAGCGTGAAC TTTCTTGGTTTCATAGTCAC CAGCACTGGCGCCACGACGGATCCTGAAAAGGTTAGGG  
CAATACAGGAGTATCCAGAACCTAAAACACTGTTTCGAGGTCAGATCATTTCTAGGCCTCGCAAGTTATTA  
CAGATGTTTCATTAGGGACTTCGCCGCAATAGCAAGACCCATCTCGAATATCTTGAAGGGTGAAAATGGA  
ACAGTCAGTAAGCATAGGTCCAGAAATATAAAGGTTCAATTCTCTGAAGTGCAGCAAAGGGCGTTTCAGA  
AGTTGCGCGATATTTTGT CATCCGAGAATGTAATGCTCAGGTACCCCGATTTTAAGAAGCCATTTCGATCTA  
ACGACCGATGCTTCGGCTCACGGCATAGGTGCAGTTTTGTCTCAAGAGGGTCGTCTCTATAACAATGATTTC  
AAGAACATTGAAGGACAGCGAGGTTAACTATGCAACAAATGAGAGAGAGTTATTGGCCATCGTATGGTC  
ACTTGCCAAGTTAAGGCACTATTTGTATGGGGTGAAAGACATTAATATCTTCACTGACCATCAACCCTTGA  
CCTTCGCAGTTTCGGAATCCAATCCAAATGCGAAGATTAAAAGGTGGAAAGCGCGCATTGACGAGTCTAA  
TGCACGTATCTTCTATAAACCTGGCAAGGACAATCTGGTTGCGGATGCCTTGTCAAGACAGCAGCTCAAC  
GCTGTAAATGAACAAGAAGTTGAGTCCTGCGCAGCAACGATCCACAGTGAGGTATCTCTCACCAACACCA  
TTGAGACAACAGACAAACCTTGAATTGTTTTCAAAACCAAATAGTGCTAGAAGAGGGCGGTTTCCCTT  
AAAACGAAGTTTTATTCTTTTTTGGAATAAGAAACGCTACTTGATCAGCTATACTTGCATCGAATCGCTGC  
TAGACGAGCTCGAAGATGTAGTTTCACCCAAATGCGTAAATGCTCTCCACTGTAATTTACACACGCTTGCA  
ATGATACAAGATGCATTGGTTTCGAAGATACCCGGCCACAAAATTCTGGCACTGCAAAAATCGCGTAGTGG  
ACGTATTTGCGGTTGGAGAAAGAAGGGAAATCCTCACAGCCGAGCATAATAGGGCCCATAGGTCTGCACA  
GGAAAATATTAAGCAGGTACTCTCGGAGTACTACTTTCCAAAGATGGCAAAAATAGCCAATGAAATAGTA  
CAAAATTGCAAAACATGTGCTAGGGCTAAATATGATAGACACCCCAAAAAACAAGAGCTTGGGGAGACA  
CCGATCCCTCACATGTAGGAGAGATGTTACACATAGACATTTTCTCCACTGACAGGAAATACTTTCTCAC  
TTGCATCGACAAGTTCTCTAAGTTTGCTATTGTCCAACCGGTCCCTTCAAGAACCATTGTGGATCTGAAGC  
CAGCTTTAATGCAACTAATGAATTTTTTTTCCAAAAGCCAGATCCATTTACTGTGACAATGAACCGTCATTG  
AATTCAGAGACCATCGTGACTTTGCTCGCAAACA ACTATGGGGTCAGCATTTCAAATGCACCACCATTGC  
ATAGCATCTCGAATGGACAGGTTGAGCGCTTTACAGCACTCTGTTAGA ACTAGCCAGATGCCTAAAGAT  
CGATAAAGGCATAAGTGACACCGTAGAAGTCATTTTACTGGCTACAACCGAGTACAATAAGTCGATCCAT  
TCGGTCATCGACCAGAGACCAGTCGATGTGGTTCAGGGCGACCCAGATGAGCCACAAGAAAAGATACGA  
GAAAAGATCAGAAACGCTCAGACGACGCTCAGAGCTAGGGAGAACGCAAATCGGCAGAATAGGGTCTTC  
GACGTTGGTGACAAAGTTTTGGTCAAGTCCAACCGACGGCTCGGAAACAACTCACACCTTTATGTGATG  
AGAAGGCCGTGGAAGCAGACCTGGGGACCGAGGTCTCATTAGAGGGAGGGTGGTCCACAAGGACAACC  
TAAGGTGACTCCCTTGTTTTTTCACACCTTTTTTTTTTAGCCACTTGGCATAGTTTTTTATAAAACATTTTTGGT  
GGTGGGCAAACCTCTTTAAAAAAAGAAAAACA AAAAAGTTGCTAAAAAGAAAGAAAAACA ACTTCACTTC  
ACAGGTTTGGATCCATATTACTCCTTTCCTTATCAGTGGCTTCGGCACATGTCACCGACTACTCGCGTGCC  
AAGTACATTCCCATCGTCGACGGTGAAATCTTGGTATGGGAAGAATACGCCTATGTTAGGCACTCGGCAA  
ACCTCTCAGAGTACGTGCGAATGGTGGAGAAACGGTCAAATTAATTGACATGTTCCCGCTATCCCAT  
GAAAAAGCCTCTAAGTGTGGACACGGCACATCTACAAGACCTATTGGAGGCGTTAGGCACACACCATAGA  
GTCGCCAGGAGTTTAGATTTCTAGGATCCATACTGAAGGTTGTGGCGGGTACACCCGATGCCGGTGATTT  
AGAGCAGACTAGGTTCACTGAAAGGCAACTAATAAATGCCAACAAATAGACAAATAGAAATAAACACTAG  
AGTTCAAGACCAGCTTAACCAGTTAACAATCACTGTCAATAAAATTTCTCAAGATAACCAAAA ACTCACAA  
GTTGACACTAGCCATTTATTTGAAACACTACTGACTAGAAACAGAATGCTGATGATGGAGTTGCAAAATT  
TAATGCTTGCTATTACTCTTGCGAAGGCTAACATTGTTAGCCCAAACATTTTGGACCACTCAGATTTGAAA  
TCAATTTGGCTAGAGGAACCCACCAACACTCCCATAGGAGATCTTATGTCCGTTGCGTCCGTAAAAGTTCT  
TCAATCCATTAACACTATACATTTTTATAATTAAATTCCCAAAGATTAAAAAAGCTTGCAGAAAAATTACGA  
TTTATCCTGTCGTCCACAAGAACTTCATATTGCGATTGTTTGACAACGTCATAGCCGAATGCGATGGAGAA  
ACCCACACACTGCAGAGTTGCGCCGCTTCACCTGGAGCCACATTTTGTCTGCTGGCATTAGAGAGTTCATG  
TGCCAAAGAGCTCCATGCAGGTGGCACGGCACACTGCGAGATCCAGCCGAGCAACCTGGAAATAATCAC  
CCATGTAGATGACGGAATCATCATCCTCAACGACGGGTCCGCAAGGATTCAGGTGGACAACGGCACTGAG  
ATCCAGGTACAAGGCACGCATCTCATCACGTTTCGGAGACCGAGTCGCAATTAACGGGACTCTGTTTTACA  
ATCACAACAACGTACGCAATAGAGTCCCGGGTATTGCCAATTCTCCCTTGCTGAACATCACTGCCAGCCA  
AGATGTCCTCAGCCTCCCTTACCTTCATCGTTTGAGTGAACGTAATTTGGAGGTGATACAGCAATTCAAGA  
AAGACGCCGGA ACTGATCAAGCTTATCGTGTGGCATTTCATCATTGGAGCCATATGCTGTGCTTTAATCTGC  
ATTGGCCTCACTCTTTGGCGGATCATCGACGCAAAGAAGTCTGCGAAGCAGTTACGAGAAGTCGTCGCCG  
GGATTGGGTGCGCCGAGGACGGCCTTATAATTGAAGGGGGAGTAGTTAACACATAACACTTAATATAGGA  
TATTTCATAAGTTATAATCAACCTCGCTATCGCGTGCTTCATAAGTTAAGGAACAGCCCCCGCAATTGCG  
ACACTGCATACTTTGTATCAGCGCGCAATAGCTGCAATGGTCAGCGGCGGTAACCGGACACTTTTGTTTTG  
CTGCAAGAGTTTCCGTTATTGCCTAAGATTTTGCTGAGTCGGCTTGCCGACCATGACATTGTGGCGTGATG

CGAGTTTTGGCTTAGCTTAAGTAAAATTTTCTGTGCATTAAGTTTTTTAGTTTTGNATT  
>9\_rnd-1\_family-250\_\_LTR\_\_Gypsy  
TGTAGCATGCGTACATATGTATATACATACATATGAATAAGGCTGCAACACTTTGTTGTTATGCCAACAGA  
ATGCAAACATAAGCAGCGACTTTGTGCGCAGCGCGCCTAACGATAAGTGCCCTCTGCGCATATTCAAGCGC  
AGACGAAATATGATCCGCACTTGATAACAACGACCGCCCAAATAGCTAAGTCAGCGTTCTCACGCTTGAC  
CGTCGTTGTGTATACATATGTGCGCGCATGACTCTCTCTGACTCTCTTGCTGTATATAATAAGCCAAAACC  
ATGTATGTAAAACGGCTGCTCACTGCTTCGCGGTGGACAGCTCGAACTCGAAAAGAAAACANATAATAAAA  
GAACCATCAAGGAAGACGGACGTCTTTTTAATCTTGGAACCATTACATGGCGACCGTGACAGGACGTCAC  
AAAAACATGAAAACGTTAAGATACATAACTTCAACTCTAATTTTAAACCAGTCATAAAAGTAATTAAGA  
AAGTAAATTAAGGAAATAACACTCAAAAACAACCTGAAACAACGAAGCATCTGGAACGGCACACACCCTG  
GAGAATCAAAAATTAAGTGAAGTACAGGGGGCATGAGCTCTAAAAATACTTTAAAGCTAAAAAGGC  
GCAGTGGCATTAAAGAGCGGATCAGGCAAAGAAAGTCTGAGATCGTAAGACTCTTATATAAGTCCCAA  
ACCCAATACCTTGGGAAACTGCAGTCAAGCTACATGACGAACTCAAACATCTTGAGTCGTTAAACAAAGT  
AAAGAGCCCCCTGTCCCTCAGAGGAAAAACTTATTAATCCAGTNCACATCGACCACAGCCACAACCGA  
TCCCGAGAAGGCAACGTGAATGCCAGCAGACTGCGAGGGACCGCTTTACAGCCAACATTGCCTGGGCAC  
ATGTCAGCGGCCACCCACGAGNAAAAAACTAGTACGAGAGGCAAACCGCCCCCTTGTAACCAACGCTGGAA  
CAAGAAGAAGTACGAGAGGCAGACCGCCCCCTTGTAACCAACGCTGGAAAACACCAAGGGTGAAGTACCG  
ACAGCGCCACAGAGGGCGCACAGCAAAAAAAATTTATAATTATAATTATTATAAAATATTTGTAAACT  
ATTGTAATGCCCGACGACAATTGAGTCGACCGGCAAGACGTTTGGCCCGTAAAGCCATTTCGAAATACTAG  
GCAGGACAAAATGTACATTCAAGTAAAAACCGAATTAATATTAATTTCTCCCCGCCACGGGCGTAAATA  
CAAAAAATTTTAAATATAAACTCAAACCTTATAAAGTTAATGAATAGCGTTAACAAAACCTATA  
AGTTCATATATAAATCAAGGACCCAAGTATATATTAAGAATAACAACCCCAAATATGGGTTTGGTAGACG  
TTAAGACTGTTGACTCGACGGCTAACGTAATAAATAAAGTTGAGGTCAGCAACACAGATGTAAATTTGAT  
AACAAATTTTGTGCTTATGATATTTGTCATATTAGTAGGACATCTATTGTACAAATTATATACGTATCATAA  
TAAATGCATAAAAAGAGATACCAGAGTCACGCAAATGACCTGGATAAAATCTAAATTTTTCTTGAACAAT  
GATAAGCGACAAAATAAAATAAATAAATAAATGAAATTTGAGAAATATATATATATTCTTATTACCAG  
AAATGCCTATTAATAAGTTTGCATAGAAGTATACTTAGAAGCAATATATAATAGCGACGCAGACTTTAG  
AATTCGTGCATTGAATATTCTACAACAATAAGATAAAAGGCATAATTTTAAATACACTGCCATANGTTGG  
CATTAAAGAAATAGTGGTCCAGTGGACGGCGAGTGCCCAATTATAATGGTAAAACTTCATAAATAGAGAA  
CTATGGAATGGAGTGAATTAGCGAAAAAAATAAATAATTTCAAAGATAAATTCGAAAAATCTTATAAGTG  
TGTTAATAAGAACGCACCTATAAGGGTTGAAACGCTAATTCACCACATAAACATATTAGTGCTAAACTAT  
AATAACATAGTTCAACTTTTATTTAAGTAAAGAAAAATAGGCTTACAGAGCAGCATGTAAATCAATGTAAG  
AAAATAATCAAATCACTTGGGACTAGAATATCGAATATCAGCACTAGGCACAACATAGTAATAGATATCC  
CAACAGATTTAAATTAATGGCAACTTTTGAACCAGATCAACTAGAAGAACTGAATGAGTCTAAGCCAAC  
ACTAAATAGTGACCCTGATATTGAAGCTGATAGCGACATTGAGCCACTTGAATTAACAGAACCAACATG  
GCNGTAAATCAAGTGGCCTTAGACCGCGAATATGTAAGACAGGTATCGTCTACAATTCCGGAATTTGATG  
GCAAAAGCTATCACTGGCCAGATTTCTAACGGCTTTAAGACTAGTCGATCGTACTAAAGGTACACAAGAA  
GACTTAGCCGTAGAAGTCATAAAGTCTAAAATATTGGCCCAATTTTGTACAAAGTACAAAATGAAACATC  
CATTATTGGTATTATAAATAAATTAATACCAATATCAAAGGCGAGTCAACTGACGTTATCAAAGCTAAG  
TTGCTTAACATAAAGCAGAAAGGCAAGTCAGCCTCGCAATATACAGCTGAAATTGACAGTTTGCGTAAGC  
AACTGGAAGCAGCCTATATTGACGATGGACTAGATTTTGATAACGCAGAGAAATTTTCTACTAAAGAAAC  
AATATCTGCCATGACAAAGAATTGCGAATACGAAAAGCTTCGCATAATATTAGAAGCGGGCAATTTTCAGC  
AATTTCAATGATGCTATGGGTAAATATATCCAATGCAGCACTGAAATGACTGGATGCCCAAGTACAATAT  
TGTAACAAAGGCAGAAACGATCGTGGAATTAACAGCCGTAACAACCAAGAGGTAGAGGCAATAGCC  
GCGGCAATAGTAATTTCCACTATAATGGTAATAACAACAATAGGGGTAAATTTTCAGAGGAAATTACCGAGG  
TGGCAACCGAGGTAGAAACAATTCAAACCGAGGTGGCTACCAAACAGAACAGTAACAATAGAGGTAA  
TGTCCGAGTAACTCAAGGTAACCTCGGAAAACCAACAGACCCCTCAGATGTTCAAAGCCAATAAATGGCT  
CAATAAAAACCATCAACCTTAATCTTAGCATGTTTGTAATAAATTAAGAATGAAAGAACAGGTAAATCAAT  
TACACTGTTAGTAGATACTGGTGCAGATATATCCATATTAAGAAGAAAATACAGATATATTCGAAAATGTA  
AACGAAACAATTACTACCCAAATATCGGGTATTGGCGAAGGCATAATTCCTTCAAAGGCTTAGCCTTTA  
TAGAACTCACTACAGGCAAATATATAATTCCACATAATTTTCATTTAGTCGAACAAAACCTTCCCAATACCG  
AGTGATGGCATACTAGGCATAGATTTTATAAAAACAATATAATTGCCAACTAGATTTCACTCAAAGTGGCG  
ACTCACTTATTCTTCGCCCAAACAACCTTAAATTATCCAATTCGATTAAAAATACTTCATACTTGTGACAAT  
AATGCCACAGTACTCCAGCTCGTTCCGAAGTTGTCCGTGAAATACAAATTCCTCAATACAAAATCAAAT

TCTTATATTAAATCAAGAAATTGATGAAGGAATTTACATCGCAAACACGATATCCAATCACAAAAATACA  
TATGTCCGTATTATAAATACAACAAATGCCAATAAGATAGTAACTTAAATAAAAATATGAACTT  
TGAACAATTATGATATAGTAAAAGAAACCAACGAAGGAAGAGACAACTTCGTTATGGAAAAATTAATCA  
AAAACCTTTCCACCTTTATTTAAAAATCAATTAAGATTATGCACCAGATATACCGACATATTCGGATTA  
GAAACCGAATCGATAACAACCTAATAATTTTACAAGCAAAAGCTTAGATTGAAGGATGATGAGCCCGTATA  
CATAAAAATTATAGAAGTCCTCACAGCCAAGTACAAGAAATTCAAGCCCAAGTGCAAAATTAATAGACG  
ACAAAATAGTCGAACCATCAGCCTCAGAGTATAATAGCCCACTTTTATTAGTTCCGAAGAAGTCCCTTCCG  
GACTCTGACAAGAAGAAATGGCGATTAGTAATTGACTATCGTCAAATTAATAAAAAGCTATTGTCCGATA  
AATTTCCGCTACCGAGAATTGATGATATTCTAGATCAGCTAGGTAGAGCAAAATATTTTTCATGCCTAGAC  
TTAATGTCTGGCTTTCACCAAATCGAACTCGAAAAAAGTTCTAGAGATATAACGTCATTTTCAACGAGCAA  
TGGCTCGTATCGCTTTACGCGATTACCATTTGGCTTGAAAATAGCCCCAACTCCTTTCAAAGAATGATGA  
CAATAGCATTTTCTGGTCTCGAACCATCTCAGGCCTTCCTTTATATGGATGATCTGATAGTAATCGGTTGTT  
CCGAAAAACATATGGTCAAAAATTTAACTGAAGTTTTTGACAAATGTAGGAAATTC AACCTGAAACTACA  
TCCAGAAAAATGTTCAATTTTTCATGCATGAAGTCACATTTTGGGACATAAATGCACTGATAAAGGAATCTT  
GCCAGACGATAAAAAATACGACGTCATAAAGAACTACCCAGTCCCACATGATGCGGACAGCGCTAGGCG  
ATTCGTTGCATTTTGCAATTACTATAGGCGCTTTATTA AAAATTTTGCCGACTATTCACGTCACATAACAA  
GATTATGTAAAAAGACGTTAAGTTCGAATGGACATCTGAATGCCAGAATGCCTTCGATCACCTCAAAACG  
GCTCTTATAAACCCAACCTTGTTACAATATCCAGATTTTCGCTAAAGAATTCTGCATAATAACTGATGCAAG  
TAAGCAAGCGTGTGGAGCGGTTTTAACTCAAACCATAATGGACTCCAACCTCCAATTGCATACGCATCA  
AGATCCTTTACTAAAGGAGAAAGTAACAAGAGTACTACTGAGCAAGAATTAGCGGCTATTCATTGGGCAA  
TAACGCATTTCCGACCATATATTTATGGTAACCATTTCACGGTTAAAACCTGACCATAGACCGCTAACCTAC  
TTATTTTCAATGGTAAATCCAAGTTC AAAGTTAACACGTATGAGGCTTGAATTAGAGGAATATAATTTTAC  
GGTAGAATATCTGAAGGGTAAAGATAATTTCTGATGCCGATGCGTTATCAAGAATAACCATAAAACAGCTA  
CAGGAAATAACAGGGACAATCCACAAAGTCACTACAAGATATCAAAGTAGACAAAATTCCTGCGCAGGA  
AAATATCAGGTAGAATTGCCAAGGCAATCTACAGAAAAAGCTTCACAGCCCAACGTATACGAAGTCATTA  
ACAATGACGAGGTACGCAAAGTAGTGACCTTGCATATAAAAGATACGCTTTGTTTCTTTAAACATGGCAA  
GAAAATTATTGCAAGAATTAACATTGGTGATCTATATACAAATGGAAATATTGACTTAGGTCAACTATTCC  
CAAGGCTCGAAAATGAAGCCGGTATATTGAAAATAAGCCAATTGAAAATGGCACCGTGGGAAAATATCTT  
TGATACAATTTCAATAGATAATTTCAAAAATATGGGCAATAAAATATTGACTAAATTAAGGGTAGCGCTA  
CTCAACCCGGTGACCACAATAACAAATAATAAAGAAAAAGAAGCTATATTGTCTACACTACATGACGACC  
CAATACAAGGAGGTCATACTGGCATTACAAAACCTTGGCCAAGGTCAAACGACATTACTTTTGGAAGG  
TATGACTCGAGATATTACTGAGTACATACGTAAATGTACAAATGCCAGAAAGCTAAAATAACTAAGCAT  
AGTAAGACCCCATTAATTATAACTGATACACCTGTACATGCGTTCGATAGGGTTATAGTGGACACAATTG  
GTCCGCTACCCAAATCTGATAATGGTAATGAGTACGCAATCACATTAATTTGTGACTTGACTAAATACCTA  
GTCGCGATACCAATACCAAACAAAAACGCTAGTACAGTAGCCAAAGGTATATTCCAATCTTNTATTCTAA  
AGTACGGTCCAATGAAGACGTTTATTACGGACATGGGAACAGAATACAAGAACTCAATTATAAATGATTT  
GTGCAAGTTTATGAAAATAGACAACATAACATCAACTGCACATCATCACCAGACAGTTGGAACAGTCGAA  
AGAAGTCACAGAACTTTTAACGAATACATACGATCTTATATATCAGTTGATAAAACTGATTGGGACGTAT  
GGCTCCAATACTTTGTCTATTGTTTTAATACGACCCCTTCTACGGCACATAATTATTGTCCGTATGAATTAG  
TATTTGGTAAGACATGTAATCTACCAAATACTTCAATAGCATAGCAAACATAGAACCAATATATAACAT  
AGATGATTATGCTAAGGAGAGTAAGTATAGATTAGAAGTAGCATACAAAAGAGCAAGAAATATGCTAGA  
ATTAAATAAGATGAAACAAAAGAAGCGATATGACTTAAATAGTAAGGAATTA AAATTATCCATAGGAGA  
TAAGGTTTTATTAAAAAATGAAGTAGGACATAAACTAGATTTTAAATACACAGGGCCCTATAGAGTAGAA  
AAAATAGAAGATAGGGATAATATAGTTATTTCCGGAAATAAGAATAAAACGCAAACAGTCCATAAGGAC  
AGATTA AAAATTTTAAATTCATAATCAAGCATGCAAAAATACATGAAAAAAAAAAAAAAAAAATATAT  
ATATATAAAAAAAAAAATAATATATAATAATAATAAATAAATAAATTATTAAGGAAAATAACTCCATTGTA  
TTACGTTATTTTTTAAAAGGAGGGAGATGTAGCATGCGTACATATGTATATACATACATATGAATAAGGCT  
GCAACACTTTGTTGTTATGCCAACAGAATGCAAAACATAAGCAGCGACTTTGTGCGCAGCGCGCCTAACGAT  
AAGTGCCCTCTGCGCATATTCAAGTGCAGACGAAATATGATCCGCACTTGATAACAACGACCGCCCAAT  
AGCTAAGTCAGCGTTCTCACGCTTGACCGTCGTTGTGTATACATATGTGCGCGCATGACTCTCTCTGACTC  
TCTTGCTGTATATAATAAGCCAAAAACCATGTATGTAAAACGGCTGCTCACTGCTTCGCGGTGGACAGCTC  
GAACTCGAAAAAAAAACAGATAATAAAGAACCATCAAGAAAGACGGACGTCTTTAATCTTGGAACCAT  
TACA

>9\_rnd-1\_family-93\_\_LTR\_\_Gypsy



TGTAGCATGCGTACATATGTATATACATACATATGAATAAGGCTGCAACACTTTTGTGTGTTATGCCAACAGA  
ATGCAAACATAAGCAGCGACTTTGTGCGCAGCGCGCCTAACGATAAGTGCCCTCTGCGCATATTCAAGTGC  
AGACGAAATATGATCCGCACTTGATAACAACGACCGCCCAAATAGCTAAGTCAGCGTTCTCACGCTTGAC  
CGTCGTTGTGTATACATATGTGCGCGCATGACTCTCTCTGACTCTCTTGCTGTATATAATAAGCCAAAACC  
ATGTATGTAAAACGGCTGCTCACTGCTTCGCGGTGGACAGCTCGAACTCGAAAAGAAAAACAGATAATAA  
AGAACCATCAAGAAAGACGGACGTCTTTTAATCTTGGAACCATTACATGGCGACCGTGACAGGACGTCAA  
AAAACATGAAAACGTTAAGATACATAACTTCAACTCTAATTTTAAACCAGTCATAAAAGTAATTAAAGGA  
AGTAAATTTAAAAGGAAATAAACAACCTCAAAAACAACCTGAAACAACGAAGCATCTGGAACGGCACACACCCT  
GGAGAATCAAAAATTAAGTGAAGTACAGGGGGCATGAGCTCTAAAAATACTTTAAAGCTNAAAAGG  
CGCAGTGGCATTAAAGAGCGGATCAGGCAAAGAAAGTCTGAGATCGTAAGACTCTTATATAAGTCCCAA  
ACCCAATACCTTGGGAAACTGCAGTCAAGCTACATGACGAACTCAAACATCTTGAGTCGTTAAACAAAGT  
AAAGAGCCCCCTGTCCCTCAGAGGAAAAACTTATTAATCCAGTTTCACATCGACCACAGCCACAACCGA  
TCCCGAGAAGGCAACGTGAATGCCAGCAGACTGCGAGGGACCGCTTTACAGCCAACATTGCCTGGGCAC  
ATGTCAGCGGCCACCCACGAGTAAAAAACTAGTACGAGAGGCAAACCGCCCCCTTGTAACCAACGCTGGAA  
CAAGAAGAAGTACGAGAGGCAGACCGCCCCCTTGTAACCAACGCTGGAAAACACCAAGGGTGAAGTACCG  
ACAGCGCCACAGAGGGCGCACAGNAAAAAATTTATAATTATAATTATTATTAAAATATTTGTAAAATCTAT  
TGTAATGCCCCGACGACAATTGAGTCGACCGGCAAGACGTTTGGCCCGTAAAGCCATTCGAAATACTAGGC  
AGGATAAAATGTACATTCAGTAAAAACCGAATTAATATTAAATTTCTCCCCGCCACGGGCGTAAATACA  
AAAAATTTTAAATATAAACTCAAACCTTATAAAGTTAATGAATAGCGTTAACAAAATCTATAAG  
TTCATATATAAATCAAGGACCCAAGTATATATTAAGAATAACAACCCCAAATATGGGTTTGGTAGACGTT  
AAGACTGTTGACTCGACGGCTAACGTAATAAATAAAGTTGAGGTCAGCAACACAGATGTAAAATTGATAA  
CAATTTTTGTGCGTTATGATATTTGTCATATTAGTAGGACATCTATTGTACAAATTATATACGTATCATAATA  
AATGCATAAAAAGAGATACCAGAGTCGCGCAAATGACCTGGATAAAAATCTAAATTTTTCTTGAACAATGA  
TAAGCGACAAAATAAATAAATAAATGAAATTTTCGAGAAATATATATATATTCTTATTACCAGAAATGCC  
TATTAATAAGTTTGCATAGAAAGTATACTTAGAAGCAATATATAATAGCGACGCAGACTTTAGAATTCGT  
GCATTGAATATTCTACAACAATAAGATAAAAGGCATAATTTTAAATACACTGCCATANGTTGGCATTAAA  
GAAATAGTGGTCCAGTGGACGGCGAGTGCCCAATTATAATGGTAAAACCTTCATAAATAGAGAACTATGGA  
ATGGAGTGAATTAGCGAAAAAATAAATAATTTCAAAGATAAATTCGAAAAATCTTATAAGTGTGTTAAT  
AAGAACGCACCTATAAGGGTTGAAACGCTAATTCACCACATAAACATATTAGTGCTAAACTATAATAACA  
TAGTTCAACTTTATTTAAGTAAAGAAAAATAGGCTTACAGAGCAGCATGTAAATCAATGTAAGAAAAATAAT  
CAAATCACTTGGGACTAGAATATCGAATATCAGCACTAGGCACAACATAGTAATAGATATCCCAACAGAT  
TTAAAATTAATGGCAACTTTTGAACCAGATCAACTAGAAGAACTGAATGAGTCTAAGCCAACACTAAATA  
GTGACCCTGATACTGAAGCTGATAGCGACATTGAGCCACTTGAATTAACAGAACCAAACATGGCNGTAAA  
TCAAGTGGCCTTAGACCGCGAATATGTAAGACAGGTATCGTCTACAATTCCGGAATTTGACGGNAAGAAA  
AGCTATCACTGGCCAGATTTCTAACGGCTTTAAGACTAGTCGATCGTACTAAAGGTACACGAGAAGACTT  
AGCCGTAGAAGTCATAAAGTCTAAAATAAAGTGGCCCAATTTTGTACAAAGTACAAAATGAAACATCCATT  
ATTGGTATTATAAATAAATTAATACCGATATCAAAGGCGAGTCAACCGACGTTATCAAAGCNAAGTTGC  
TTAACATAAAGCAGAAAGGCAAGTCAGCCTCGCAATATACAGCTGAAATTGACAGTTTTCGTAAGCAACT  
GGAAGCAGCCTATATTGACGATGGACTAGATTTTGTATAACGCAGAGAAATTTTCTACTAAAGAAACAATA  
TCCGCCATGACAAAGAATTGCGAATACGAAAAGCTTCGCATAATATTAGAAGCGGGCAATTTTCAGCAATT  
TCAATGATGCTATGGGTAAATATATCCGATGCAGCACTGAAATGACTGGANGCCCGAGTACAATATTGTA  
CTACAAAGGCAGAAACGATCGCGGAAATTACAGCCGTAACAACCAAAGAGGTAGAGGCAATAGCCGCGG  
CAATAGTAATTTCCACTATAATGGTAATAACAACAACGGGGGTAAATTCAGAGGAAATTACCGAGGTGGA  
GGCCGAGGAATGGAAACAATTCAAACCGAGGCGGCTACCAAAACCAGAACAGTAACAATAGAGGTAATG  
TCCGAGTAACCCAAGGCAACTCGGGAAACCNACAGAACCCCTCAGATGTTCANAGCCAGTAAATGGCTCA  
GTAAAACCATCAACCTTAGTCTTAGCATGTTTGTAAAANTTNANAATGTGAAGAACAGGTAAAAACTTG  
CACTNTTAGTAGATACTGGTGCAGACATATCCATGTAAAGGAAAAATNCAGATATATTCGANAATGTCCA  
AACGAAAAAATCACTACCCAAATATCGGGCATNNGCGAAGGCATAATNCCGTCCAAAGGGCTNAGCTCT  
NTATGGGACNCACTACAGGCAAATACATAATTCCACACGATTTTCACTTAGTCGANACAGAAATTTCCCAAT  
ACCNNGTGATGGCATANTAGGCATNGACTTTATNAAACAATNCAATTGCCAACTAGATTTCANNCAAAGT  
GGNGACTCGCTTATNNTTNGCCCAAACAACCTTAAATTATCCAATTCGTGTTCCAATAACACACAGTTCTGG  
CAATAATNCCACAGTNCTNCCAGCNNGNTCCGAAGTNGTCCGNGAAATACAAATTCNNTCAGATGAAGAT  
CGTGTNCTNATTCCAAACCAAGAAATTGANGAAGGNATTTACGTGCGAAACACGATTGCAACAACCAAAA  
ATGCATATGTCCGTATTACTAAATACGACAAATGCCGATCAAGTAGTGAAATTAAAAAATTANAATATGA

ACCACTTCGAACAATTACGACATAGTCAAAAAGAAACCAACGAAGGAAGAGACAACCTTCGTTATCNAAATT  
AACCAAAAACCTTTCCACCNCNATTCAAAAATCAATTAAGAACTTATGCACCAGATATANCGACGTATTC  
GGATTNGAAACCGAATCGATAACNACCAATAACTTTTACAAGCAAAAAGCTNAGATTGAAGGATGATGAG  
CCCGTATACANAAAAATTATAGAAGCCCTCACAGCCAAGTANANGAAATNCAAGCNCAAGTGCAAAAAT  
TAATCGACGACAAAAATAGTCGAACCGTCNGCCTCAGAGTATAATAGCCCACTTTTATTAGTTCCGAAGAA  
GTCCCTTCCGGGCTCTGACAAGAAGAAATGGCGATTAGTAATTGACTATCGTCAAATTAATAAAAAGCTA  
TTGTCCGATAAATTTCCGCTGCCNAGAATTGATGATATTCTGGATCAACTAGGNAGAGCAAAAATACTTTTC  
ATGCCTTGACTTAATGTCAGGCTTTTACCAAATCGAACTCGAAAAAGTTTCNAGAGATATAACGTCTTTTTTC  
AACGAGCAATGGCTCGTATCGCTTCACGCGATTACCATTTCGGCTTAAAAATAGCGCCAAACTCCTTTCAA  
GAATGATGACNATAGCATTTTCCGGNCTAGAACCNTCTCAGGCTTTCCTTTATATGGATGATCTGATAGTN  
ATCGGTTGTTCCGAAAAACATATGNTCAAAAACCTTAAGTATGTTTTTGAGAAATGTAGGAAATNCAACC  
TGAAACTACATCCAGAAAAATGTTTCATTTTTCATGCATGAAGTCACATTTTGGGACACAAATGCACNGAT  
AAAGGAATCTTGCCAGACGANAAAAAATACGACGTCATNAAGAACTACCCAGTCCCACATGATGCGGAC  
AGCGCTAGACGATTTCGTTGCATTCTGCAATTACTATAGGCGTTTTATCAAAAATTTTGCCGACTATTCACG  
TCACATAACAAGATTATGTAAAAAAGACGTTAAGTTTGAATGGACAGCTGAATGCCAGAATGCCTTCGAN  
CACCTCAAACGGCNCNTNATAAACCCGACCTTGTTACAATATCCAGATTTTCGGCAAAGAATTTTGCATAAT  
AACNGATGCAAGTAAGCAAGCGTGTGGAGCGGTTTTAACTCAAACCATAATGGACTCCAACCTTCCAATT  
GCATACGCATCAAGATCCTTTACTAAGGGAGAAAGTAACAAGAGTACTACNGAGCAAGAATTAGCGGCN  
ATTCATTGGGCAATAACGCATTTCCGACCATATATTTATGGTAANCACTTCACNGTCAAAACNGACCACA  
GACCGCTAACATACTTATTTTCAATGGTAAATCCAAGCTCAAAGCTAACGCGTATGAGGCTTGAAGTAGA  
GGAGTATAATTTTACGGTNGAATATCTGAAGGGTAAAGACAATTCGTAGCCGATGCGTTATCAAGAATA  
ACCATNAAACAGCTACAAGAAATAACAGGGACAATCNAGAAAGTCACTACAAGATATCAAAGTAGACAA  
AATTCCTGCGCAGGAAAAAANAAGTAGAATTGCCAAGGCAATCTATAGAAAAAGCTTCAAAGCCCAACG  
TATACGAAGTCATTAACAATGACGAGGTACGTAAAGTAGTGACCTTGCATGTAAAAGATACGCTATGTTT  
CTTTAAACATGGCAAAGAAAATTACTGCAAGANNTGACGTTGGCGATTTATATACCAATGGAANTNTTGAC  
TTAGGTCAATTNTTCCAAAGGCTCGAAAAGGAAGCCGGTATANNNAATCAGCCAACTCAAAGTGGCA  
CCGTGGGAAAAATATCTTTGANACAGTTTCAATAGATAATTTCAAAAATATGGGCAATAAAATATTGACT  
ACATTAAGGGTAGCGCTACTCAACCCGGTGACCACAATAANAAACAATAAAGAAAAAAGAAGCTATATT  
GTCTACGCTCCATGACGACCCAATACAAGGAGGTCATACNGGCATTACAAAACCTTGGCCAAGGTCAAAN  
GACATTACTTTTGGAAAGGTATGACTCGAGATATTACTGAGTACATACGNAAATGTCAAAAATGCCAGAA  
AGCTAAAATAACTAAGCATAGTAAGACCCCNNTAACNATAACTGATACGCCNGTACACGCTTTCGACAGG  
GTTATAGTGGACACNATTGGTCCGCTACCCAAATCTGANAATGGNAATGAGTACGCAGTCACATTAATTT  
GTGACTTGACTAAATACCTAGTCGCGATNCCAATNCCAACAAAAGCGCTAGCACAGTAGCCAAAGCNAT  
NTTCGAATCTTTTATTCTAAAGTACGGTCCAATGAAGACGTTTATTACGGACATGGGAACAGAATACAAG  
AATTCAATTATAAATGATTTGTGCAAGTNTNTGAAAATAGACAACATAACATCAACTGCACACCACCACC  
AGACAGTTGGAACAGTCGAAAGAAGTCACAGAACTTTTAAACGAATACATACGNTCATATATATCGGTTGA  
TAAAACTGATTGGGACGTATGGCTCCAATACTTCGTCTACTGTTTCAACACGACCCCNCTACGGCACATA  
ATTATTGTCCGTATGAACTAGTATTCGGTAAGACANGCAATCTACCAAACACTTCAATAGCATAGNNAA  
CATAGAACCNNTATATAATATAGATGATTATGCTAAGGAAAGTAAGTATAGATTAGAAGTAGCATACAAA  
AGAGCTAGAANTATGCTAGAATAAATAAGATGAAACAATAAAGAAGCTATATGACTTAAANAGTAAGGA  
ATTAAAAATTATCGTAGGAGATAAAGTCTTATTAAGAAATGAAGCAGGACATAAAGCTAGATCCTAAATA  
CNCAGGGCCCTATANAGTAGAAAAATAGAAGATAGGGATAATATAGTTATTNCGGATATAAGAATAAAA  
NACAAACAGTCCATAAGGACAGATTAAAAATTTTAAATTCATAATCGAGCATGCAAAACTCTAATATAAA  
AAAAAAAATATATATAAAAAAATAACAAAATAATAAAAAAATAAATAATTATTAAGGAAAA  
NNAACTCAATTGNATTACGTTATTTTTTTAAAAGGAGGGAGATGTAGCATGCGTACATATGTATATACATA  
CATATGAATAAGGCTGCAACACTTTGTTGTTATGCCAACAGAATGCAACATAAGCAGCGACTTTGTGCG  
AGCGCGCCTAACGCTAAGTGCCCTCTGCGCATATTCAAGTGCAGACGAAATATGATCCGCACTTGATAAC  
AACGACCGCCCAAATAGCTAAGTCAGCGTTCTCACGCTTGACCGTCGCTGTGTATACATATGTGCGCGCAT  
GACTCTCTGACTCTCTTGCTGTATATAATAAGCCAAAAACCATGTATGTAAAACGGCTGCTCACTGCTT  
CGCGGTGGACAGCTCTAACTCNAAAAAATAAAGAACCATCAAGGAAGACTGACGTCTTTTCATCAGG  
GAACCATTACA

>9\_rnd-1\_family-286\_\_LTR\_\_Gypsy  
TGTAGCATGCGTACATATGTATATACATACATATGAATAAGGCTGCAACACTTTGTTGTTATGCCAACAGA  
ATGCAAACATAAGCAGCGACTTTGTGCGAGCGCGCCTAACGATAAGTGCCCTCTGCGCATATTCAAGTGC

AGACGAAATATGATCCGCACTTGATAACAACGACCGCCCAAATAGCTAAGTCAGCGTTCTCACGCTTGAC  
CGTCGTTGTGTATACATATGTGCGCGCATGACTCTCTCTGACTCTCTTGCTGTATATAATAAGCCAAAACC  
ATGTATGTAAAACGGCTGCTCACTGCTTCGCGGTGGACAGCTCGAACTCGAAAAGAAAAACAGATAATAA  
AGAACCATCAAGAAAGACGGACGTCTTTTAATCTTGGAACCATTACATGGCGACCGTGACAGGACGTAC  
AAAAACATGAAAACGTTAAGATACATAACTTCAACTCTAATTTTAAACCAGTCATAAAAGTAATTAAGG  
AAGTAAATTAAAAGGAAATAACACTCAAAAACAACACTGAAACAACGAAGCATCTGGAACGGCACACACCC  
TGGAGAATCAAAAATTAAGTGAAGTACAGGGGGCATGAGCTCTAAAAATACTTTAAAGCTAAAAAG  
GCGCAGTGGCATTAAAGAGCGGATCAGGCAAAGAAAGTCTGAGATCGTAAGACTCTTATATAAGTCCCAA  
AACCCAATACCTTGGGAAACTGCAGTCAAGCTACATGACGAACCTCAAACATCTTGAGTCGTTAAACAAAG  
TAAAGAGCCCCCTGTCCCTCAGAGGAAAAAATTATTAATCCAGTTTCACATCGACCACAGCCACAACCG  
ATCCCGAGAAGGCAACGTGAATGCCAGCAGACTGCGAGGGACCGCTTTACAGCCAACATTGCCTGGGCA  
CATGTCAGCGGCCACCCACGAGTAAAAACTAGTACGAGAGGCAAACCGCCCCCTTGTAACCAACGCTGGAAC  
AAGAAGAAGTACGAGAGGCAGACCGCCCCCTTGTAACCAACGCTGGAAAAACACCAAGGGTGAACCTGACCGA  
CAGCGCCACAGAGGGCGCACAGCAAAAAAATTTATAATTATAATTATTATTTAAATATTTTGTAAACT  
ATTGTAATGCCCGACGACAATTGAGTCGACCGGCAAGACGTTTGGCCCGTAAAGCCATTTCGAAATACTAG  
GCAGGACAAAATGTACATTTCAGTAAAAACCGAATTAATATTAATTTCTCCCCGCCACGGGCGTAAATA  
CAAAAAATTTTAAATATAAACTCAAACCTTATAAAGTTAATGAATAGCGTTAACAAAACCTATA  
AGTTCATATATAAATCAAGGACCCAAGTATATATTAAGAATAACAACCCCAAATATGGGTTTGGTAGACG  
TTAAGACTGTTGACTCGACGGCTAACGTAATAAATAAAGTTGAGGTCAGCAACACAGATGTAAATTTGAT  
AACAAATTTTGTGCTTATGATATTTGTCATATTAGTAGGACATCTATTGTACAAATTATATACGTATCATAA  
TAAATGCATAAAAAAAGAGATACCAGAGTCACGCAAATGACCTGGATAAAATCTAAATTTTCTTGAACAA  
TGATAAGCGACAAAATAAAATAAATAAATAAATGAAATTTTCGAGAAATATATATATATTCTTATTACCA  
GAAATGCCTATTAATAAGTTTTCGATAGAAGTATACTTAGAAGCAATATATAATAGCGACGCAGACTTTA  
GAATTCGTGCATTGAATATTCTACAACAATAAGATAAAAGGCATAATTTTAAATACACTGCCATANGTTG  
GCATTAAAGAAATAGTGGTCCAGTGGACGGCGAGTGCCCAATTATAATGGTAAAACCTTCATAAATAGAGA  
ACTATGGAATGGAGTGAATTAGCGAAAAAATAAATAATTTCAAAGATAAATTCGAAAAATCTTATAAGT  
GTGTTAATAAGAACGCACCTATAAGGGTTGAAACGCTAATTCACCACATAAACATATTAGTGCTAAACTA  
TAATAACATAGTTCAACTTTATTTAAGTAAAGAAAAATAGGCTTACAGAGCAGCATGTAAATCAATGTAA  
AAAATAATCAAATCACTTGGGACTAGAATATCGAATATCAGCACTAGGCACAACATAGTAATAGATATCC  
CAACAGATTTAAAATTAATGGCAACTTTTGAACCAGATCAACTAGAAGAACTGAATGAGTCTAAGCCAAC  
ACTAAATAGTGACCCTGATACTGAAGCTGATAGCGACATTGAGCCACTTGAATTAACAGAACCAAACATG  
GCNGTAAATCAAGTGGCCTTAGACCGCGAATATGTAAGACAGGTATCGTCTACAATTCCGGAATTTGATG  
GCAAAAGCTATCACTGGCCAGATTTCTAACGGCTTTAAGACTAGTCGATCGTACTAAAGGTACACAAGAA  
GACTTAGCCGTAGAAGTCATAAAGTCTAAAATAATTGGCCCAATTTTGTACAAAGTACAAAATGAAACAT  
CCATTATTGGTATTATAAATAAATTAAATACCAATATCAAAGGCGAGTCAACTGACGTTATCAAAGCTAA  
GTTGCTTAACATAAAGCAGAAAGGCAAGTCAGCCTCGCAATATACAGCTGAAATTGACAGTTTTCGCTAAG  
CAACTGGAAGCAGCCTATATTGACGATGGACTAGATTTTGATAACGCAGAGAAATTTTCTACTAAAGAAA  
CAATATCTGCCATGACAAAGAATTGCGAATACGAAAAGCTTCGCATAATATTAGAAGCGGGCAATTTTCAG  
CAATTTCAATGATGCTATGGGTAAATATATCCAATGCAGCACTGAAATGACTGGATGCCCAAGTACAATA  
TTGTACTACAAAGGCAGAAACGATCGTGGAATTTACAGCCGTAACAACCAAAGAGGTAGAGGCAATAGC  
CGCGGCAATAGTAATTTCCACTATAATGGTAATAACAACAATAGGGGTAATTTTCAGAGGAAATTACCGAG  
GTGGCAACCGAGGTAGAAACAATTCAAACCGAGGTGGCTACCAAACAGAACAGTAACAATAGAGGTA  
ATGTCCGAGTAACTCAAGGTAACCTCGGAAAACCAACAGACCCCCCAGATGTTCAAAGCCAATAAATGGCT  
CAATAAAACCATCAACCTTAATCTTAGCATGTTTGTAAAAATTAAGAATGAAAGAACAGGTAAATCAATT  
ACACTGTTAGTAGATACTGGTGCAGATATATCCATATTAAGAAAGAAATACAGATATATTTCGAAAATGTAA  
ACGAAACAATTACTACCCAAATATCGGGTATTGGCGAAGGCATAATTCCTTCAAAGGGCTTAGCCTTTAT  
AGAAGTCACTACAGGCAAATATATAATTCCACATAACTTTTATTTAGTCGAACAAAACCTTCCCAATACCGA  
GTGATGGCATACTAGGCATAGATTTTATAAAACAATATAATTGCCAACTAGATTTCACTCAAAGTGGCGA  
CTCACTTATTCTTCGCCCAAACAACCTTAAATTATCCAATTCGATTAAAAATACTTCATACTTGTGACAATA  
ATGCCACAGTACTCCCAGCTCGTTCCGAAGTTGTCCGTGAAATACAAATTCCTCAATACAAAATCAAATT  
CTTATATTAAATCAAGAAATTGATGAAGGAATTTACATCGCAAACACGATATCCAATCACAAAANACATA  
TGTCGGTATTATAAATACAACAAATGCCAATAAGATAGTAACTTAAATAAAATAAAATATGAAACTTTG  
AACAAATTATGATATAGTAAAAGAAACCAACGAAGGAAGAGACAACCTTCGTTATGGAAAAATTAATCAAA  
AACTTTCCACCTTTATTTAAAAATCAATTAAGATTTATGCACCAGATATACCGACATATTCGGATTAGA

AACCGAATCGATAACAACATAAATTTTACAAGCAAAAGCTTAGATTGAAGGATGATGAGCCCGTATACA  
TAAAAATTATAGAAGTCCTCACAGCCAAGTACAAGAAATTCAAGCCCAAGTGCAAAANTAATAGACGAC  
AAAATAGTCGAACCATCAGCCTCAGAGTATAATAGCCCACTTTTATTAGTTCCGAAGAAGTCCCTTCCGGA  
CTCTGACAAGAAGAAATGGCGATTAGTAATTGACTATCGTCAAATTAATAAAAAGCTATTGTCCGATAAA  
TTTCCGCTACCGAGAATTGATGATATTCTAGATCAGCTAGGTAGAGCAAAATATTTTTTCATGCCTAGACTT  
AATGTCTGGCTTTACCAAAATCGAACTCGAAAAAGTTCTAGAGATATAACGTCATTTTCAACGAGCAATG  
GCTCGTATCGCTTTACGCGATTACCATTTGGCTTGAAAATAGCCCCAACTCCTTTCAAAGAATGATGACA  
ATAGCATTTTCTGGTCTCGAACCATCTCAGGCCTTCCTTTATATGGATGATCTGATAGTAATCGGTTGTTCC  
GAAAAACATATGGTCAAAAATTTAACTGAAGTTTTTGACAAATGTAGGAAATTCAACCTGAACTACATC  
CAGAAAAATGTTTCATTTTTTCATGCATGAAGTCACATTTTTGGGACATAAATGCACTGATAAAGGAATCTTG  
CCAGACGATAAAAAATACGACGTCATAAAGAAGTACCCAGTCCCACATGATGCGGACAGCGCTAGGCGA  
TTCGTTGCATTTTGCAATTACTATAGGCGCTTTATTAATAAATTTTGCCGACTATTCACGTCACATAACAAG  
ATTATGTAAAAAGACGTTAAGTTCGAATGGACATCTGAATGCCAGAATGCCTTCGATCACCTCAAAATGG  
CTCTTATAAACCAACCTTGTTACAATATCCAGATTTTCGCTAAAGAATTCTGCATAATAACTGATGCAAGT  
AAGCAAGCGTGTGGAGCGGTTTTAACTCAAACCATAATGGACTCCAATTCCAATTGCATACGCATCAA  
GATCCTTTACTAAAGGAGAAAGTAACAAGAGTACTACTGAGCAAGAATTAGCGGCTATTCATTGGGCAAT  
AACGCATTTCCGACCATATATTTATGGTAACCATTTACGGTTAAAACCTGACCATAGACCGCTAACCTACT  
TATTTTCAATGGTAAATCCAAGTTCAAAGTTAACACGTATGAGGCTTGAATTAGAGGAATATAATTTTACG  
GTAGAATATCTGAAGGGTAAAGATAATTTTCGTAGCCGATGCGTTATCAAGAATAACCATAAAACAGCTAC  
AGGAAATAACAGGGACAATCCACAAAGTCACTACAAGATATCAAAGTAGACAAAATTCCTGCGCAGGAA  
AATATCAGGTAGAATTGCCAAGGCAATCTACAGAAAAAGCTTCACAGCCCAACGTATACGAAGTCATTAA  
CAATGACGAGGTACGCAAAGTAGTGACCTTGCATATAAAAGATACGCTTTGTTTCTTTAAACATGGCAAG  
AAAATTATTGCAAGAATTAACATTGGTGATCTATATACAAATGGAAATATTGACTTAGGTCAACTATTCCC  
AAGGCTCGAAAATGAAGCCGGTATATTGAAAATAAGCCAATTGAAAATGGCACCGTGGGAAAATATCTTT  
GATACAATTTCAATAGATAATTTCAAAAATATGGGCAATAAAATATTGACTAAATTAAGGGTAGCGCTAC  
TCAACCCGGTGACCACAATAACAAACAATAAAGAAAAAGAAGCTATATTGTCTACACTACATGACGACCC  
AATACAAGGAGGTCATACTGGCATTACAAAAACCTTGGCCAAGGTCAAACGACATTACTTTTGGAAGGT  
ATGACTCGAGATATTACTGAGTACATACGTAAATGTCACAAATGCCAGAAAGCTAAAATAACTAAGCATA  
GTAAGACCCCATTAATTATAACTGATACACCTGTACATGCGTTTCGATAGGGTTATAGTGGACACAATTGGT  
CCGCTACCCAAATCTGATAATGGTAATGAGTACGCAATCACATTAATTTGTGACTTGACTAAATACCTAGT  
CGCGATACCAATACCAACAAAAACGCTAGTACAGTAGCCAAAGGTATATTCCAATCTTTTATTCTAAAG  
TACGGTCCAATGAAGACGTTTATTACGGACATGGGAACAGAATACAAGAACTCAATTATAAATGATTTGT  
GCAAGTTTATGAAAATAGACAACATAACATCAACTGCACATCATCACCAGACAGTTGGAACAGTCGAAAG  
AAGTCACAGAACTTTTAACGAATACATACGATCTTATATATCAGTTGATAAACTGATTGGGACGTATGG  
CTCCAATACTTTGTCTATTGTTTTAATACGACCCCTTCTACGGCACATAATTATTGTCCGTATGAATTAGTA  
TTTGGTAAGACATGTAATCTACCAAAATACTTCAATAGCATAGCAAACATAGAACCAATATATAACATAG  
ATGATTATGCTAAGGAGAGTAAGTATAGATTAGAAGTAGCATACAAAAGAGCAAGAAATATGCTAGAAT  
TAAATAAGATGAAACAAAAGAAGCGATATGACTTAAATAGTAAGGAATTAATAATTATCCATAGGAGATA  
AGGTTTTATTAAAAAATGAAGTAGGACATAAACTAGATTTTAAATACACAGGGCCCTATAGAGTAGAAAA  
AAATAGAAGATAGGGATAATATAGTTATTTCCGGAAATAAGAATAAAACGCAAACAGTCCATAAGGACA  
GATTAAAAATTTTTAATTCATAATCAAGCATGCAAAAATACAAAAAATAATATATATAAAAAA  
AAANAATATATAATAATAATAGAAATAAATAATTATTAAGGAAAATAACTCCATTGTATTACGTTATTTT  
TAAAAGGAGGGAGATGTAGCATGCGTACATATGTATATACATACATATGAATAAGGCTGCAACACTTTGT  
TGTTATGCCAACAGAATGCAACATAAGCAGCGACTTTGTGCGCAGCGCGCTAACGATAAGTGCCCTCTG  
CGCATATTCAAGTGACGACGAAATATGATCCGCACTTGATAACAACGACCGCCCAATAGCTAAGTCAGC  
GTTCTCACGCTTGACCGTCGTTGTGTATACATATGTGCGCGCATGACTCTCTCTGACTCTCTTGCTGTATAT  
AATAAGCCAAAAACCATGTATGTAAAACGGCTGCTCACTGCTTCGCGGTGGACAGCTCGAACTCGAAAAA  
GAAAACAGATAATAAAGAACCATCAAGAAAGACGGACGCTTTTAATCTTGGAACCATTACA

>160\_rnd-1\_family-188\_\_LTR\_\_Gypsy

ATATAAGTTAACAACATAAGCATAAATATATTGCCCTAGCAACTAAGTAGCTTCGTATTAACAATGCTGAC  
GCGCCAGAACTGAGTTCAGCGCTCTGCGCTAAGAACGGCCAGCAGCGGTAAGCTGCACTGCATGGAATG  
CTGAGTCGGCTTGCCGACCATGCTTTGATGGCGTGATGCATTGAGGCTTAGGGTATTTGTATAATTTGCTT  
GTCCCTAGTTTTTAGTTTTATATGAGGCGCGCAACACATAAGTCGCCGAAATAAATATTCGTACTGTCTG  
AGCCCAAGGCCGGCANTAGAAGCCGACTTCAAACATAATCTTCCGTAATATTACTGGATCAAGGAGAAC

ATATTTTGGATCAAGGGCAGCGCGGGATCAACGCAACTTACCCAAGATAACATTGTGTGTACATCGCAGAAC  
ATACATCAATNGATAACTGGCGCCCAACCAATAAATAGGAACCCATACCATGTAAGTTCATAAGTGATT  
CAGTTTGAAGAAATTATTCACGAACGCCACGTACCGATACGTGTGATTTTTATAAAAAAAAAAAAAAATT  
GTAAAGTAAAGTAAATATTGCTGCTCTCTTCTGCCAGCATTTTCATTCCTTTAAATCATTGCATACTTTCACT  
AAAACTGTTGCATACTTTTACCAGCGTTCCTTGTCATAAAAGCATTGCATACCTTAAACGAATAATTATT  
GCATACTTTCCGGCAGCATTATATTTTTTGTCTGCATACCCCTAACAATTTTTTATAATAAATATTGCATACCC  
CAAGATTCACCAGTTTCCACTATTGCCAACAGCGTTACCTGCCGATCTTTCTCGATCGGCCTAAGTTTGAA  
AAGTGCCAACCATAAGCCAATGAGTTGGAATTATAGGGAGATAAAAGTCGAATATAATAGTGACGATAG  
CTGGGAGGGGGAAATCAATTGCTCAGTAGATCCTACTCCTGCAGATACCGTTGTAAGTGAAGAAATGGAG  
CCGGCTCAAGTTCAGAATCTCATTGAGGGTGCCATCAGGCAAGCTTTAGCGCAACAACAAAATCAGTTTC  
AAGCACAAATAACCGCTTTAGCTTCACAAGTACAGAGTTTGCAGGTGGAGGCGCCGCAAATCGTCACATA  
CGAGAAAATATCCGTCGATCCTAACGCCAAATGCGATATTCCCTTGGACATTATTAAATCTGTGCCGGATT  
TCTCCGGCGTACAGGATGAGTATGTAGCGTGGAGGCAAGCAGCCATCTACGCGTACGAACCTATTCAAGAA  
CTATCCAAAGAGCACTGCACACTACCAAGCGGTAGCGATCATTAGGAACAAAATCAAAGGCCAGCTGG  
AGCCTTACTAGTGTCTCACAACACTGTCTAAATTTTCGATGCAATACTAGCTAGGCTAGATTGCACATACT  
CGGACAAAACATCCTTGCGCTTGCTGAGACAATGTTTGGAGTTAGTTACGCAGGGCGAAATGTCCCTGAT  
GCAATACTACGATGACGTCGAAAAGAACTCACGCTCGTAACTAACAAAATTGTAATGTCTCACGACCAA  
GAAGGCGCGGATTTGCTCAACCGGGAGGTGAGAGACGACGCCTTGACGCGCTTTATCTCCGGTCTTAGGA  
AGCCGTTGAGAGCGGTTGTGTTCCCTGCACAACCAAAGATCTACCATCCGCTCTGGCCCTTGCCAGAGA  
GGCAGAAGCTAGCATTGAGAGAAGCATGTTTCGCGAACTCTTACGCTAAAGCCTTGCAAGACCGAGCGCAA  
ATTGCTGAAAGTAACAAAAACCGTGCCCAAGGCAAACAAACCAGATTTAACAAAGATGAGCAAAATCAG  
GAGAGAAATCCCCATTTTGTGAAACGCCAAAAGGGCGGTCCCCAGCCCCAGGCCCTAAAGATAATCAA  
CTGAGGCTCCACAGCCCATGGAAGTTGACTCTTCTCCAGATTTAGACAAAAAACCGACTACAGCAAGCG  
TCAGGCTAATGAGTCCAACGCACCAAAACGCAAGAATTCGTCAGACCGTTCAACAGGTCAAAGACGACA  
ACGCGTTAACAATGTCTGTAATCAGATTCCAAAGAAGCCGTAACAGAATTCGAGAAGGCGGCCAAAGA  
GGCAGTTGAAGAACTAGAGAGTGAGAACGAGTACGCACCTGGTGACGACTCGATTAATTTTTTAGGGAAC  
ACTCCCGGCTTCCGTACATTGAACGACGGTTGGCTGGGAGAACTCTGAAGATGTTGATTGACACTGGCGC  
GGCAAAAAATTATGTGAAGCCCTTAACAGAGCTAAAGACCATAACGCCGGTCGCCAAGTCATTCTCGGTA  
AACTCGATCCACGGGTCTACCGAAATCAAGCGCAAATGCTTGATGAATTTTTCCAACATACCTCCCCGTT  
TTTTCTCCTCGATACCCCTAAGTTCTTTCGACGCCATCATAGGCTTCGACTTGCTAACACAAGCCGGAGTCA  
AATTGAACTTGGAACAAAACACTCTGGAATACCAGAGTACATCCGAAAAACTCCAGTACTATCAATGTGC  
TGATGTGAACTTCACCGATGTCAACGACATCGTAGTCCCCCTTCCGTAAAGAAAGAGTTCAGGGACATG  
ATACTCAGAAACAAAAGAGCCTTCTCAAATGCAGACGAAGCTCTCCCTTTTAATACTGCTGTTATCGCTAC  
AATCCGAACAGTAGACAACGAGCCTGTGTATTCAAGATACCCGAGTCTCATGGGTGTTTCTGACTTCATAA  
ACAAAGAAGTCAAACAATTACTGGACGATGGCATAATCAGGCCCTCCAGATCGCCTTACAACAGCCCAAC  
ATGGGTGGTTGATAAAAAAGGCACTGACTCATACGGTAACCCAAAAAAAAGGTTGGTAATCGACTTCAGG  
AACTGAACGAAAAAACCATACCGGACCGCTACCCCATGCCGAGCATCCCATGATCTTAGCAAATCTAG  
GAAAGGCGAAATACTTCACTACCTCGACCTAAAGTCGGGGTACCATCAAATTTACCTTGCGGAGCATGA  
CCGCGAAAAGACTTCATTTTCAGTAAGCAGCGGCAAGTACGAGTTCTGTGCGCTACCATTCGGCCTGCGC  
AATGCAAGCAGCATATTCCAAAGGGCAATAGACGATATCCTGAGGGGAACATATAGGAAAGATTTGCTTTG  
TCTATGTAGACGACGTCATAATTTTTTCTAAAAACGAAACGGAGCACCTTCAACACATTAACATTGTGTTA  
AAATGTCTAATCGACGCAAACATGCGTGTAGGCCCGGAAAAGACTCGTTTCTTCAAGGAAAGTATCGAAT  
TCCTGGGTTTCATTGTAACCAAAGACGGAGCAACATCCGACCCCAAAAAAGTTAAAGCCATTTCAGGAATT  
CCCTGAACCAAAGAATGTCTACAGCGTTAGGTCCTTCTTGGGGTTAGCCAACACTACTATAGGGTCTTTATTA  
AGGACTTTGCCGCTATAGCGCGTCCGATATCGGACATACTTAAAGGGGAAAATGGTTTCAGTTAGTAGGCA  
CGTATCAAAGAAAATCCCTGTTGAATTTAATGAAGTTCAACGCGATGCATTTACCGTCTGCGGAGTATTT  
TGGCATCAGAAGACGTCATGTTAATGTATCCAGACTTCCAGAAACCGTTTCGATTTAACCACTGATGCTTCG  
GCCAGTGGAATTGGCGCGGTTCTTTCCCAAGGCAATAGGCCAATAACAATGATTTCTCGCGCCTTAAAAC  
AGGCCGAACAAAACCTATGCCACTAACGAAAGAGAATTGCTGGCCATTGTGTGGGCTTTAGGCAGATTGCA  
GAACTTTCTGTACGGTTCTAGGGAAATTAACATTTTTCACGGACCACCAGCCGCTCACGTTTCGCTGTGTGCGG  
ACAAGAACACGAATTCCAAGATTAAAAGATGGAAATCTTACATTGACCAGCACAATGCCAAAATGTTTTA  
TAAACCGGGCAAAGAGAATCTGGTGGCGGATGCCCTTTCAAGGCAAAACATTAATGCTCTGCAAGATGGG  
CCCCGTTCCGACGCTGCAACCGTTCACAGCGAACTTTCCCTGACCTACACGGTCGAGACAACAGACAAAC  
CTTTGAATTGCTTTAGGAACCAGATTGTCTTAGAGGAATCGCGTTTTCCGCTAAAGCGAACTTGTTGCTG

TTTCGCAGCAAAACACGCCACTTGATCAGTTACACTGACAAGAGCACAATTCTCAAAACCCTCAAAGAAG  
TTGTGAATTCTGGAGTCGTTAATGCAATACATTGCGATCTTCCCACGTTGGCAAGTTTCCAACACGACCTG  
ATTTTGTATTTCCCTGCNACCCAATTCTGGCATTGCAAAAATCTTGTGCAAGATATAACGGACAAAAACGA  
GCAGTTAGAAATCATCACTGCCGAGCACAATCGAGCGCACAGAGCAGCTCAGGAAAACATTAAACAAGT  
ACTTCGGGACTATTATTTTCCCAATATGGCCAGTCTGGCCAAAGAAGTGGTTGCAAACCTGCAGGGTCTGCA  
CTAAAGCCAAATACGATAGGCACCCGAAGAAACAAGAACTCGGGGAAACGCCTATACCAAGTTATACTG  
GCGAAATGTTGCATATTGACATTTTCTCGACAGACAAGAAACAGTTCTTGACCTGCATAGACAAATTCTCA  
AAATTTGCAGTCGTCCAACCGATATTATCCAGAACGATAATCGATGTCACAAGCCCTCTACTGCAAATTGT  
TAACCTTTTTCCCGCAACCAAGACAATTTATTGCGATAACGAGGGCGGCCTTCAATTCCGAGACCATCACTT  
CGATGCTCCGAAACGCCTACGGCATTTCGATTGTGAATGCGGCTCCGCTTCACAGCACCTCAAACGGCCA  
GGTGGAGCGCTTTCATAGCACCTGACCGAAATTGCGAGATGCCTCAAGTTAGACAAGAAAATCAGCGAC  
ACTACAGAATTAATCTTAAAGGCTACGATAGAGTACAACAAAAGTTTGCACCTCAGTAACCCTCGAGAAAC  
CAATTGAGGTCGTTTCATGCAGCAGCTTCTGATCGTCGCGGGAACGTCAAAAACAGGGCTAATTAAGGCACA  
GCAAGACAATATCAAAAGGTGCAATGCATCCAGGCAAAACCGCGTTTTCGAGGTAGGAGAAAAGGTGTT  
CCAGAAGAACAACAAGAGGCTAGGGAACAAGTTAACTCCCTTATGCTCAGAACAAGGTGCAAGCAGA  
CCTGGGAACGTCTGTCTCATTAAAGGGGAGGGTGGTCCATAAGGACAACCTGAAATAAGTTTTCCTCCAC  
AATTAGCTAGTAAGCCAACTCAGAGTTTAAACACCGTCTTATATTGTTTCGTCCATTTTCAGGTTTGCACCTCA  
CTTTGCTTGTGGCACTAGCAGCGGTAAATGCTCGGATCACCGACTTCTCGCATGCCAACTACATTCCGGTC  
TTAGACGGGGAAGTACTGGTGTTCGATCAACGTAGCTACTTGAGGCACTCAAGTAACATTTCCGAATTTGT  
TAGTATGGTAGACGAGACGGAAAGACTGTCCGATTCCCTTTCACAGTCGCATATGCGCAAACCTACTAGAC  
GTAGATACAGATCACCTTAGAACATTGTTGTCCGTTCTTCAAGTGCATCACAGATTTGCACGAAGCCTCGA  
TTTCTTAGGCACTGCCTTGAAGGTTGTTGCTGGCACCCCTGATGCTTCAGATTTCTTAAGGATCCGCGTTAC  
AGAGACGCAGTTGGTGGAGGCTAACTCCAACAGATACTAATAAACTCCGAACTCAAAAACAAATAAA  
CAGACTAACGGACACTATCAATAAAATTATCAGTTCCCGCAAAGGCGATTTGGTTGACACTCCTCATTAT  
TCGAGACCCTGTTGGCAAGAAATAGAATACTGAACACAGAAATTCAAAATTTAGTACTACCATAACGTT  
GGCAAAAGCAAGCATAGTAAATCCTACAATCCTTGATCATACCGATCTGAAATCACTTATCGAACAAGAT  
ACCCAATAGTTAGCTTAATAGAAGCTTCTAAGATCAAGGTCCTTCAGTCCGAGAATATTATCCACATATT  
AATAGCCTACCCTAAAGTTGAGTTTAGGTGCCAAAAGGTCTCCGTCTACCCCGTTTCACACCAACAAACCA  
TTCTGCGACTCGACGAAGACACGTTGGCGGAATGCGAAAAGGATACCTTTGCAGTTACTGGATGCACCGT  
AACTACGCATAACACCTTCTGCGAACGAGCACGGCGCGAAACCTGTGCTAGCTCCCTTCACGCGGGAAAC  
ATCGCCAACTGCCACACTCAACCTAGCCACCTGAAAGCGATAATGCCTGTAGATGACGGCGTCGTGGTTA  
TCAACGAAGCGACAGCGCGCTCCGAACAGATGATGACGCAGAGGTAACCGTCTCAGGAACCTTCTGAT  
AACTTTCGAACGGTCTGCAACTATCAATGGCACAGAATTTGTAAACCTGCGCAAATCACTAAGCAAGCAG  
CCTGGCATCGTGAGGTCACCGCTCCTAAACATCATCGGACATGACCCGGCACTAAGCATACCACTCCTGC  
ATCGTATGAACATCAACAACCTTGCTATCAATTCGAGATTTCAAGGAGGAGGTAGTTGCGGCTGGCTCGCC  
TAAATTCTGGTTCGCGATTGGCGCGGTCTGAATGTGCGGACTAATTGGCTCATTCTTCTTTCTGGTGCT  
AAGGAAAAGACGAGCCTCCATGCAGATGCAGAAGGCGATTGACAAATACGACATGCCCCGAGGACGGCCA  
TCATCCTGAGGGGGGGGTAGTTAACAACCTAAGCATAAATATATTGCCCTAGCAACTAAGTAGCTTCGTAT  
TAACAATGCTGACGCGCCAGAAGTGAAGTTCAGCGCTCTGCGCTAAGAACGGCCAGCAGCGGTAAGCTGAC  
ACTGCATGGAATGCTGAGTCGGCTTGCCGACCATGCTTTGATGGCGTGATGCATTGAGGCTTAGGGTATTT  
GTATAATTTGCTTGTCCCCTAGTTTTTAGTTTTATATGAGGGCGCGCAACACATAAGTCGCCGAAATAAATA  
TACTGCTCCGGCATTGCCGATAAAACATATCTTTTCGTTATTGTCTGAGCCCAAGGCCAGCAATAGAAGCCA  
ACTTCAAAACATAATCTTCAGTAATATTACTGGATCAAGGANAGCGCGTTTGATCAAGGGCAGCGCGGG  
ATCAACGCAACTTACCCAAGATAACATTGTGTTACATCGCAGAACATAACATCAATTGATAACTTATA  
>160\_rnd-1\_family-360\_\_LTR\_\_Gypsy  
ATAACTTCTCCCGTTTACCATCCGGCGAGTATTCAGTGCGGTTGCCTCTGAAGCGGAGTGCAGAACTTCTA  
GGAGAGTCTTATGGCCAGGCTCATCTTCGATTTCTCAGTCTTGAGCGAAAATTGGGTCGGAATTCGCATCT  
GAAGGAGCAGTATTCGGCAGCACCAACAACCAAGTTGCGTGTTGTGTTTGATGGCTCAGCAACTACTGATT  
CTGGACATTCTCTTAATGATGTACTGATGGCGGGACCAATCATTCAACCTAAGTTGTTTCACATTCTGATT  
AGAGGAACCCTCGGGATACAGGCCAATCTACCTACTGGACACGGCGGGAAAGGTCCTGGAAAGGATTGT  
GTATGACCGTTTACTTAGTGTCGTCGAAGAGAAAGAAGCTCTGTCCAAACAGCAATACGGATTTTCGAAG  
GCAAGGCTTACGGTCGATGCAATTAGGGCGGCGGTAGATATTGCCGCTAAAGCAATAGAGGGGAACCAGA  
TGGAGGTGGGGAGACGAGGAGTATTGCGCGGTGATTACGTTGGACAACCGCAATGTCTTAAACTTAGTAA  
GCTGGTCTCGAAATCTGGAAGCCTTAGACCGAATAGGGATACCGTCCCCCATCTCCGTATTGTAGTATGT

GCATATATTGAGGGTACAAGGTACCAATAAAGTAACATCGTTTAAGCATAAAATAAATCAGCAACACATTG  
TTGCAGTACACAAACAAAACCTTTTCGAGTGAGCGTGTAATATGATCGCCCACTTATGAGCTACGCTAAGT  
CAGCAGTCCCACGCTGACCATTCTAGTACATATATACATACATGCAAATATGTATATAAGACTCTCTCTC  
TCCCGATTATGCTGATAAGACAAAATATGTATGAAGCCGCTCCGCTGCTGGCGTAACCGGCAGCGCAGCT  
ATGCGATCTTAGTCATAAGAATATATTGAATAAAACATTCAAAAAACTAAAGTCAAACGGCACAGACGTG  
CCCGTGTGTTGAACTATTTGAATCGATGACATTTACCATTACATGGCGACCGTGACTAAGGTCAAACAG  
ACCTGGATATGGAAGGATAGCAGCAACGGCAGTAACAACAACAACAGCAACAACAGCAGGAACAACCA  
AACAAAAAACCAGTGAGTAGAGTGTGATGAGTGCGAGGCGAAGCGGTGTGGAGTA  
AACAGCAAAAATGTCATAAGTTGGGACAACCTCGGTCAAGTTACATGCCGAAGTTGAATACATAAAAAAAT  
TACTTTCAACTCGAAAAAGTCAAACACCAGCCACGCACACATCCACCTACCCTGTTATCAAAAAATATTGC  
AAAGCAAAAATTAATCCAACCTTCACCAAAATTAAAGGAGATTCCGAATCAAAAAAAGACCTGCACGAA  
CGACTGCGAGAGACCGCTATTTATTCTACATTACCGATACACCTGTGCAGCCAGCACTGGCGCCCCATCAA  
AGAATTAACAACCTGTGCAGCCAGCACCGATCCCGTCTGACGCACCAAGTCAGGCCAAAAATAAATGAAC  
CGACAGCGCTTCCAAGAGCGCATTTTTTTCCCATTGCATACTTATTGTTACNATTTTTTATAACAAGTATTATA  
ATACCAGTACATCTATTATATAAAATTGTATAAGTACCATAATAAATGCATTAAAAAAGAGATATCAAAGCC  
AGGCAAACGATCTGCATAAAATTTAAAATAAAATTACTAATAATCAGCAACAAAGATTGCTTAAAGTTAT  
TGAAAATAAATTAATTAATAAATATATAACTATTTGATTGAAAATTTGTATATGTCTTTGCACATTTTAATA  
ATTTATTTTAAAATGAAATGGAATGGCAAACATTAATGCCGCATTAATTAATAAAAAAATGTTGA  
TAAATCATACAAGTGTCTAGCACAAAATAGGAATATTTCAAACGAGACTATAAGTAGACACGCAGCTATA  
CGAGTTGCATGTTTTAACCAAGCTCGTTCCAGATACACGACAATAAAGAAAAGTCAAATACTCAGCATT  
GGTCGTATGTATCAAGATTTTTGCATAGATTAAACACAAACCTAAATAGCATTAAATTAATAATTCGATA  
GACATAACTATACCTTCGATTTTGAATACTCCAGCATTAGAGGAGGAAGAAGCAAACACAGACTTAGAGA  
CAGAAAGCGAATCTGAAATCGCAAGCGGTTTCAGATAAACATATAAAGAAGAAGATCTAAGCGATCTTA  
CGATACCAGCGGTAATCACACTAGCCGAACCTATCTGAGTCTGAACCAGAGTCTATTACTGAAGTAAAAAC  
TGTAATATGGCCATGGCACAAGTAGAATTTCTTAAGCTAGCCTCTTCACTCATACCTGAGTTTAGTGGA  
AGTCTGAGAATCTACAAAGTTTCATTGATGCTCTTAGTTTAGTGGAATCACTGAAAGGAACACATGAACT  
ACAGCAGTCAGCCTAATAAAAACTAGACTCAAAGGCCATGTTTCGAACTTCATCAATACTGAACCAACAA  
TAGTGACGATAATAGACAAACTAAAAAGCGGCATAAAAGGCCAATCAGCTAAAGAGCATTATCCGCTAA  
ATTGTTCAATCTGCAGCAAAAGCAAAATACAGCAAGTCAATATATTCAAGAAGTTGAACAGTTGACAAGG  
GCTTTGCAATCAGCACATATGATTAACGGTGTATCGCAAGAATATGTCTGAAGAAGTGAAGCCTACGAAGTT  
GGGTCTGTAATGAAATCAATCATAGCAAACAGCACAAATTGACGAAGTTAGGTCTGTAATGAAATCACGAA  
ATTTCAATACANTGAGTGAGATTACAACCTGTGTTTCGTCGATAGTTGCACAGACGCAGTAGGACACCTAAA  
TAGAGTCCAATATGCTGCGCAGCAACAAAGATATAGACCGAACCGAGGATATAACCGCGGAAACTACCG  
TGGGATACTGGTGCAGACATATCTCTGTTAAAAGACAACCTCAGACACTTTTAATGATATAAACATGGACA  
ACAAAATAAATATTCGGGGAATCAATCAAGGATTAATTCAATATAAAGACTGACATCCTTAGAAATACA  
AATAACTAAATATATAATTCCACACAACCTCCATATTGTCTGAATCAACCTTTTCCATACCGTGTGATGGAA  
TTTTAGGAATAGATTTTATTAATAAATAAATTGTCAACTAGATTTACACTTTCAAAAGATCTGCTCATA  
ATAGGACCAGACAATCTATACTATCCTATATATGTTCCCATAAATTACAGCTCTGGTAACAATACAATAGT  
GTTACCAGCAAGATCCGAAGTTGTTTCGAAAAATTAAGTTAATTTCAAATGAAGATAGCATTTTAATTCCGA  
ACCAGGAAATTCAACCTGGTATATATGCAGCATACACAGTCGTAACAACCTGCAAATGCATTCTGTCGGTTT  
ACTAAATACAACCTAGTACCAATCAAATGATTAATATAAATAAGTTGAATTATGAACCATTAGCAAATTAT  
GATATATCCGAAATAAACAATGAACTAGAACGAACGATGTTATGTCAAAGTTAACTAAAAATTTTCCAA  
AACTATTGTTGGATTCTGCAGCAGCCTCATCAAATTAGCATAAGCAAACATTCATGTAAACATAAGAAGA  
GGTTGTAATTTTGGTCTAGTGGACCATATAAACAAGGTTGGCAAGCCTTTCTTGCACTTGTCGCAGCTGCT  
ATAAATTGCATATTAGTTTTTTGTCTGCTCTTAGTTGTGTGCTCTGTTTGGTGTTCTGATTTTGTCTTGT  
GAAAAAATGATGCAAGGCGAGAACACAGATGATATGCAGTCAAACAGGGTGTCTTTTCTTAAGCGCAAA  
GCGGTTGCATTGTTTGAGCGAGCCAAGTGTGTTGAAAATGAATTATCTGAGGATAAAATTAACAACCTCTT  
GTGCCGTCGACTTAGAAGTGCGCATTTTGCTAATTGAACAAACTAAGTCTGCCTTTAATACCGCGCATAGC  
TCGCTAGAGGAGCTTAATTTTCGATGAAATTGGCAGCAAACCTACGCGATGATTTTGACGAGTTGATCGCCA  
TGGTTAAAGCTCGCGTAAATATTCAGCGTAGTCAATCTAACGGCCCCGCCCCACTACCGGGATGCATAATA  
GTCCACGCGCTGCTTCAAAGGTTGGACACCCAGACTCAGACCAAATGGGAGGAGGCCGAGGCATTGAC  
AAAATCCCGACAGCCGAAGGGCTCTTCACATTTCTGGAGAGGCGTAGTCAAAGGCTGGAGAGCGTGCAAC  
ATGCCATGTATCCCATATAACCAATTATCAGGTGGGCAAATCCAACCATAACACTAACCACAGCAAAAG  
AGTGCTTGTAGCTGAGACTAACCAAAATGGGTGCAGTTTTTGTGATGCGTCTGGTCACGGGATCTACACAT

GTGGTAAATTCGGAAAGTTGTCTCCATCGCTTTGGCATAAGGAAGTCAAGAACTGGCTCTTTGTTATAAC  
TGCCTAAGGAAGGGACACCAAACCTCGATCTTGCAGTAGTAGTCATTTTCGTACTTGTGGAGAAAAGCATC  
ATACACTGTTCCATTTTGTCACTTCAAGAGAAGCTGACGCGCCGACACAATTACATACATCGGCTGATTTG  
GGCGCCGCCACTTCGACGCACTCTCACTCCACTACGTCTCTTGCTGTCCAAGGTCTTCAGTCTGGTGTGTG  
CTCCTGGCCACTGCAGTGGTACTGGTAAAGAATAGTTCTGGTTCCTTGTTCCTGTAGGGCCTTATTAGA  
CTCAGGCTCGCAGTTGCACATGGTCACATCCCGTTTCGCACAGAGACTTCAGTTAAGGAAAACCTAGGTCTG  
TCATGGGTCTCGGAGACACAAGCGTCTCTACTGAAGGATCAGCCGTTAGGATTAACATGAAGTAACAAGA  
CTCAGATTATTCAGCCATCTTTGATGCTCTTGTGACTCCAACAATTACTGATAGTCAGCCCAGCTTCGTCAT  
CGATACATCAGACTGGAAAATTCCCTCGAACATAAAGTTGGTTTGATCATGCGTTCAACAAACCACAGCG  
AGTGGATTTCTTAATCGGAGCGAGCCTTTTCAATGAGCTTTTGTCTGTTGGGCAAATAGTGCTTTTGCCAG  
GACTACCTCTTCTGCAAAAAACCTCGTCTTGGCTGGGTCGTGACCGGTGGATTTGAGAGACCGCGCAATGC  
CTCGTTGTTGGCTGCCGGCCGCACTCCTAATAGCGAAGCTAGTCAGTTGGACGTTTCGTCTGAATGAGTTGG  
TTCGGCGGTTTTAAGAAATTGAAATCTTGGAAGAGCCTACAGTAAAGGCCACCAAAGAAGAGGCGGAAT  
GCGAGTAGCATTTTGCCAATGACTTCTCCCGCTTACCATCCGGCGAGTATTAGTGCAGGTTGCCTCTGAAG  
CGGAGTGCAGAGCTTCTAGGAGAGTCTTATGGCCAGGCTCATCTTCGATTTCTCAGTCTTGAGCGAAAATT  
GGGTCGGAATTCGCATCTGAAGGACCAGTATTCGGCAGCACCACAACCAAGTTGCGTGTGTGTTTGATG  
GCTCAGCAACTACTGATTCTGGACATTCTCTTAATGATGTACTGATGGCGGGACCAATCATTCAACCTAAG  
TTGTTTCACATTCTGATTAGAGGAACCCTCGGGATACAGGCCAATCTACCTACTGGACACGGCGGGAAAG  
GTCCTGGAAAGGATTGTGTATGACCGTTTACTTAGTGTCGTGCAAGAGAAAAGAAGCTCTGTCCAAACAGC  
AATACGGATTTTCGCAAGGCAAGGCTTACGGTCGATGCAATTAGGGCGGGCGGTAGATATTGCCGCTAAAGC  
AATAGAGGGAACCAGATGGAGGTGGGGAGACGAGGAGTATTGCGCGGTGATTACGTTGGACAACCGCAA  
TGTCTTAAACTTAGTAAGCTGGTCTCGAATTCTGGAAGCCTTAGACCGAATAGGGATACCGTCCCCCATTC  
TCCGTATTGTAGTATGTGCATATATTGAGGGTACAAGGTACCAATAAAGTAACATCGTTTAAGCATAAAT  
AAATCAGCAACACATTGTTGCAGTACACAAACAAAACCTTTTCGAGTGAGCGTGTAATATGATCGCCCAC  
TTATGAGCTACGCTAAGTCAGCAGTCCCACGCTGACCATTTCGTAGTACATATATACATACATGCAAATATG  
TATATAAGACTCTCTCTCTCCCGATTATGCTGATAAGACAAAATATGTATGAAGCCGCTCCGCTGCTGGCG  
TAACCGGCAGCGCAGCTATGCGATCTTAGTCATAAGAATATATTGAATAAAACGTTCAAAAAACTAAAGT  
CAAACGGCACAGACGTGCCCGTGTGTTGAACTATTTGAATCGATGACATTTACCATTACATGGCGACCGT  
GACTAAGGTCAAAACAGACCTGGATATGGAAGGATAGCAGCAACGGCAGTAACAACAACAACAGCAACA  
ACAGCAGGAACAACCAAAACAAAAAACCAGTGAGTAGAGTGTGATGAGTGCAGAGG  
CGAAGCGGTGTGGAGTAAACAGCAAAAATGTCATAAGTTGGGACAACCTCGGTCAAGTTACACGCCGAAG  
TTGAATACATAAAAAAATTACTTTCAACTCGAAAAAGTCAAACACCAGCCACGCACACATCCACCTACCC  
TGTTATCAAAAATATTGCAAAGCAAAAATTAATCCAACCTTCACCAAAATTAAAGGAGATTCCGAATCAA  
AAAAAGACCTGCACGAACGACTGCGAGAGACCGCTATTTATTCTACATTACCGATACACCTGTGCAGCCA  
GCACTGGCGCCCCATCAAAGAATTAACAACATGTGCAGCCAGCACCGATCCCGTCTGACGCACCAAGTCA  
GGCCAAAAATAAATGAACCGACAGCGCTTCCAAGAGCGCATTTATTTCCCATTTGCATACTTATTGTTACAA  
TTTTTATATAACAAGTATTATAATACCAGTACATCTATTATATAAATTGTATAAGTACCATAATAAATGCA  
TTAAAAAGAGATATCAAAGCCAGGCAAACGATCTGCATAAAATTTAAAATAAAATTACTAATAATCAACA  
ACAAAGATTGCTTAAAGTTATTGAAAATAAATTAATTAATAAATAAATACTATTTGATTGAAAATTTGTAT  
ATGTCTTTGCACATTTTAATAATTTATTTTAAAATGAAATGGAATGGCAAAACATTAATGCCGCAT

>9\_rnd-1\_family-424\_\_LTR\_\_Gypsy

ATATAAGTTAACAACCTAAGCATAAATATATTGCCCTAGCAACTAAGTAGCTTCGTATTAACAATGCTGAC  
GCGCCAGAACTGAGTTCAGCGCTCTGCGCTAAGAACGGCCAGCAGCGGTAAGCTGCACTGCATGGAATG  
CTGAGTCGGCTTGCCGACCATGCTTTGATGGCGTGATGCATTGAGGCTTAGGGTATTTGTATAATTTGCTT  
GTCCCTAGTTTTTATAGTTTTATATGAGGCGCGCAACACATAAGTCGCCGAAATAAATACTGCTCCGGCA  
TTGCCGATAAAACATATCTTTCGTTATTGTCTGAGCCCAAGGCCAGCAATAGAAGCCAACTTCAAAACAT  
AATCTTCAGTAATATTACTGGATCAAGGAGAACGTATTTGGATCAAGGGCAGCGCGGGATCAACGCAACT  
TACCCAAGATAACATTGTGTTACATCGCAGAACATACATTAATTGATAACTGGCGCCCAACCAATAAATA  
GGAACCCATACCATGTAAGTTCATAAGTGATTTTCAGTTTGAAGAAATTATTCACGAACGCCACGTACCGA  
TACGTGTGATTTTTAAAAAATAAAGTATAAAGTAAATATTGCTGCTCTCTTCTGCCAGC  
ATTTCAATTCCTTTAAATCATTGCATACTTTAAAAATGTTGCATACTTTCACTAAAACTGTTGCATACTTTT  
ACCAGCGTTCCCTTGTCATAAAGCATTGCATACCTTAAACGAATAATTATGCATACTTTTCGGCAGCATT  
TATTTTTGCTGCATACCCCTAACAATTTTATAATAAATATTGCATACCCCAAGATTCACCAGTTTCCACTA  
TTGCCAACAGCGTTACCTGCCGATCTTCTCGATCGGCCTAAGTTTTGAAAAGTGCCAACCATAAGCCAAT



GAGTTGGAATTATAGGGAGATAAAAGTCGAATATAATAGTGACGATAGCTGGGAGGGGAAATCAATTGCTCAGTAGATCCTACTCCTGCAGATACCGTTGTAAGTGAAGAAATGGAGCCGGCTCAAGTTCAGAATCTCATTTGAGGGTGCCATCAGGCAAGCTTTAGCGCAACAACAAAAATCAGTTTCAAGCACAAATAACCGCTTTAGCTTCACAAGTACAGAGTTTGCAGGTGGAGGCGCCGCAAATCGTCACATACGAGAAAAATATCCGTCGATCCTAACGCCAAATGCGATATTCCCTTGGACATTATTAATCTGTGCCGGATTTCTCCGGCGTACAGGATGAGTATGTAGCGTGGAGGCAAGCAGCCATCTACGCGTACGAACTATTCAAGAACTATCCAAAGAGCACTGCACACTACCAAGCGGTAGCGATCATTAGGAACAAAATCAAAGGCCAGCTGGAGCCTTACTAGTGTCTCACAACTGTCTCTAAATTTTCGATGCAATACTAGCTAGGCTAGATTGCACATACTCGGACAAAACATCCTTGCCTTGCTGAGACAATGTTTGGAGTTAGTTACGCGAGGGCGAAATGTCCCTGATGCAATACTACGATGACGTGCAAAAGAACTCACGCTCGTAACTAACAATAATTGTAATGTCTCACGACCAAGAAGGCGCGGATTTGCTCAACCGGGAGGTCAGAGACGACGCCCTTGACGCGCTTTATCTCCGGTCTTAGGAAGCCGTTGAGAGCGGTTGTGTTCCCTGCACAACCAAAAAGATCTACCATCCGCTCTGGCCCTTGCCAGAGAGGCAGAAAGCTAGCATTGAGAGAAGCATGTTTCGCGAACTCTTACGCTAAAGCCTTGCAAGACCGAGCGCAAATTGCTGAAAGTAACAAAACCGTGCCCAAGGCAAACAAACCAGATTTAACAAGATGAGCAAAATCAGGAGAGAAATCCCCATTTTGTGAAACGCCAAAAGGGCGGTCCCCAGCCCCAGGCCCTAAAGATAATCAAAGTGGGCTCCACAGCCCATGGAAGTTGACTCTTCCCTCCAGATTTAGACAAAAACCGACTACAGCAAGCGTCAGGCTAATGAGTCCAACGCACAAAACGCAAGAATTCGTCAGACCGTTCAACAGGTCAAAGACGACAACGCGTTAACAATGTCTGTACAATCAGATTCCAAAGAAGCCGTAACAGAATTCGAGAAGGCGGCCAAAGAGGCAGTTGAAGAACTAGAGAGTGAAGACGAGTACGCACCTGGTGACGACTCGATTAAATTTTAGGGAACTACTCCCGGCTTCCGTACATTGAACGACGGTTGGCTGGGAGAACTCTGAAGATGTTGATTGACACTGGCGCGGCCAAAATTATGTGAAGCCCTTAAACAGAGCTAAAGACCATAACGCCGGTCGCCAAGTCATTCTCGGTAACTCGATCCACGGGTCTACCGAAATCAAGCGCAAATGCTTGATGAATATTTTCCAACATACCTCCCCGTTTTTCTCCTCGATACCCTAAGTTCTTTCGACGCCATCATAGGCTTCGACTTGCTAACACAAGCCGGAGTCAAATTGAACTTGGCAAAAACACTCTGGAATACCAGAGTACATCCGAAAAACTCCAGTACTATCAATGTGCTGATGTGAACTTCACCGATGTCAACGACATCGTAGTCCCCCTTCCGTAAAGAAAGAGTTCAGGGACATGATACTCAGAAACAAAAGAGCCTTCTCAAAATGCGAGACGAAGCTCTCCCTTTTAATACTGCTGTTATCGCTACAATCCGAACAGTAGACAACGAGCCTGTGTATTCAAGATACCCGAGTCTCATGGGTGTTTCTGACTTCATAAACAAAGAAGTCAAACAATTACTGGACGATGGCATAATCAGGCCCTCCAGATCGCCTTACAACAGCCCAACATGGGTGGTTGATAAAAAGGCACTGACTCATACGGTAACCCAAAAAAGGTTGGTAATCGACTTCAGGAACTGAACGAAAAACCATACCGGACCGCTACCCCATGCCGAGCATCCCCATGATCTTAGCAAATCTAGGAAAGGCGAAATACTTCACTACCCTCGACCTAAAGTCGGGGTACCATCAAATTTACCTTGCGGAGCATGACCGCGAAAAGACTTCATTTTTCAGTAAGCAGCGGCAAGTACGAGTTCTGTGCGCTACCATTGCGCCTGCGCAATGCAAGCAGCATATTCCAAAGGGCAATAGACGATATCCTGAGGGAACATATAGGAAAGATTTGCTTTGTCTATGTAGACGACGTCATAATTTTCTAAAAACGAAACGGAGCACCTTCAACACATTAACATTGTGTTAAATGTCTAATCGACGCAAACATGCGTGTAGGCCCGAAAAAGACTCGTTTCTTCAAGGAAAGTATCGAATTCCTGGGTTCATTGTAACCAAAGACGGAGCAACATCCGACCCCAAAAAGTTAAAGCCATTCAGGAATTCCTGAACCAAAGAATGTCTACAGCGTTAGGTCCTTCTTGGGGTTAGCCAACTACTATAGGGTCTTTATTAAGGACTTTGCCGCTATAGCGCGTCCGATATCGGACATACTTAAAGGGGAAAAATGGTTCAGTTAGTAGGCACGTATCAAAGAAAAATCCCTGTTGAATTTAATGAAGTTCAACGCGATGCATTTACCGTCTGCGGAGTATTTTGGCATCAGAAGACGTCATGTTAATGTATCCAGACTTCCAGAAACCGTTTCGATTTAACCCTGATGCTTCGGCCAGTGGAATTGGCGCGGTTCTTTCCCAAGGCAATAGGCCAATAACAATGATTTCTCGCGCCTTAAACAGGCCGAACAAAACCTATGCCACTAACGAAAGAGAATTGCTGGCCATTGTGTGGGCTTTAGGCAGATTGCAGAACTTTCTGTACGGTTCTAGGGAAATTAACATTTCACGGACCACCAGCCGCTCACGTTGCTGTGTCGGACAAGAACACGAATTCCAAGATTAAGAGATGGAATCTTACATTGACCAGCACAAATGCCAAAATGTTTTATAAACCGGGCAAAGAGAATCTGGTGGCGGATGCCCTTTCAAGGCAAAACATTAATGCTCTGCAAGATGGGCCCCGTTCCGACGCTGCAACCGTTACAGCGAACTTTCCCTGACCTACACGGTTCGAGACAACAGACAAACCTTTGAATTGCTTTAGGAACCAGATTGTCCTAGAGGAATCGCGTTTTCCGCTAAAGCGAAACTTGTGCTGTTTCGCAGCAAAACACGCCACTTGATCAGTTACACTGACAAGAGCACAAATCTCAAAAACCTCAAAGAAGTTGTGAATTCTGGAGTCGTTAATGCAATACATTGCGATCTTCCCACGTTGGCAAGTTTCCAACACGACCTGATTTTGTATTTCCCTGCNACCCAATTCTGGCATTGCAAAAATCTTGTGCAAGATATAACGGACAAAAACGAGCAGTTAGAAATCATCACTGCCGAGCACAAATCGAGCGCACAGAGCAGCTCAGGAAAACATTAAACAAGTACTTCGGGACTATTATTTTCCCAATATGGCCAGTCTGGCCAAAGAAGTGGTTGCAAACCTGCAGGGTCTGCACTAAAGCCAAATACGATAGGCACCCGAAGAAACAAGAACTCGGGGAAACGCTTATACCAAGTTATACTGGCGAAATGTTGCATATTGACATTTTCTCGACAGACAAGAAACAGTTCTTGACCTGCATAGACAAATTCTCAAAATTTGCAGTCGTCCAACCGATATTATCCAG

AACGATAATCGATGTCACAAGCCCTCTACTGCAAATTGTTAACCTTTTTTCCCGCAACCAAGACAATTTATT  
GCGATAACGAGGCGGCCTTCAATTCCGAGACCATCACTTCGATGTTTCGAAACGCCTACGGCATTTCGATTG  
TGAATGCGGCTCCGCTTCACAGCACCTCAAACGGCCAGGTGGAGCGCTTTCATAGCACCTTGACCGAAAT  
TGCGAGATGCCTCAAGTTAGACAAGAAAATCAGCGACACTACAGAATTAATCTTAAAGGCTACGATAGAG  
TACAACAAAAGTTTGCCTCAGTAACCCCTCGAGAAACCAATTGAGGTCGTTTCATGCAGCAGCTTCTGATC  
GTCGCGGGAACGTCAAAAACAGGCTAATTAAGGCACAGCAAGACAATATCAAAAAGGTGCAATGCATCCA  
GGCAAAACCGCGTTTTTCGAGGTAGGAGAAAAGGTGTTCCAGAAGAACAACAAGAGGCTAGGGAACAAGT  
TAACTCCCTTATGCTCAGAACAAAAGGTGGAAGCAGACCTGGGAACGTCTGTCCTCATTAAGGGGAGGGT  
GGTCCATAAGGACAACCTGAAATAAGTTTTCTCCACAATTAGCTAGTAAGCCAACTCAGAGTTTAAACA  
CCGTCTTATATTGTTTCGTCCATTTAGGTTTGCCTCACTTTGCTTGTGGCACTAGCAGCGGTAAATGCTCG  
GATCACCGACTTCTCGCATGCCAACTACATTCCGGTCTTAGACGGGGAAGTACTGGTGTTCGATCAACGTA  
GCTACTTGAGGCACTCAAGTAACATTTCCGAATTTGTTAGTATGATAGACGAGACGGAAAGACTGTCCGA  
TTCCTTTCCACAGTCGCATATGCGCAAACCTACTAGACGTAGATACAGATCACCTTAGAACATTGTTGTCCG  
TTCTTCAAGTGCATCACAGATTTGCACGAAGCCTCGATTTCTTAGGCACTGCCTTGAAGGTTGTTGCTGGC  
ACCCCTGATGCTTCAGATTTCTTAAGGATCCGCGTTACAGAGACGCAGTTGGTGGAGGCTAACTCCAAAC  
AGATACTAATAAACTCCGAACTCAAAAACAAATAAACAGACTAACGGACACTATCAATAAAATTATCA  
GTTCCCGCAAAGGCGATTTGGTTGACACTCCTCATTTATTCGAGACCCTGTTGGCAAGAAATAGAATACTG  
AACACAGAAATTCAAAATTTAGTACTCACCATAACGTTGGCAAAAGCAAGCATAGTAAATCCTACAATCC  
TTGATCATACCGATCTAAAATCACTTATCGAACAAGATACCCCAATAGTTAGCTTGATAGAAGCTTCTAAG  
ATCAAGGTCCTTCAGTCCGAGAATATTATCCACATATTAATAGCCTACCCTAAAGTTGAGTTTAGGTGCCA  
AAAGGTCTCCGTCTACCCCGTTTCACACCAACAAACCATTTCTGCGACTCGACGAAGACACGTTGGCGGAA  
TGCGAAAAGGATACCTTTGCAGTTACTGGATGCACCGTAACTACGCATAACACCTTCTGCGAACGAGCAC  
GGCGCGAAACCTGTGCTAGCTCCCTTCACGCGGGAAACATCGCCAACTGCCACACTCAACCTAGCCACCT  
GAAAGCGATAATGCCTGTAGATGACGGCGTCGTGGTTATCAACGAAGCGACAGCGCGCGTCCGAACAGA  
TGATGACGCAGAGGTAACCGTCTCAGGAACCTTCCTGATAACTTTCGAACGGTCTGCAACTATCAATGGC  
ACAGAATTTGTAAACCTGCGCAAATCACTAAGCAAGCAGCCTGGCATCGTGAGGTCACCGCTCCTAAACA  
TCATCGGACATGACCCGGCACTAAGCATACCACTCCTGCATCGTATGAACATCAACAACTTGCTATCAATT  
CGAGATTTCAAGGAGGAGGTAGTTGCGGCTGGCTCGCTAAATTCTGGTTCGCGATTGGCGCGGTCTGA  
ATGTCGGACTAATTGGCTCATTCTTCCTTTTCTGGTGCTAAGGAAAGACGAGCCTCCATGCAGATGCAGAA  
GGCGATTGACAAATACGACATGCCCCGAGGACGGCCATCATCCTGAGGGGGNAGTTAACAACCTAAGCATA  
AATATATTGCCCTAGCAACTAAGTAGCTTCGTATTAACAATGCTGACGCGCCAGAAGTGAAGTTCAGCGCTC  
TGCGCTAAGAACGGCCAGCAGCGGTAAAGCTGACACTGCATGGAATGCTGAGTCGGCTTGCCGACCATGCT  
TTGATGGCGTGATGCATTGAGGCTTAGGGTATTTGTATAATTTGCTTGTCCCCTAGTTTTTAGTTTTATATG  
AAGCGCGCAACACATAAGTCGCCGAAATAAATATACTGCTCCGGCATTGCCGATAAAACATATCTTTCTG  
AATNTTACTGGACCAAGGAGAACATATTTTGATCAAGGGCAGCGCGGGATCAACGCAACTTACCCAAGAT  
AACATTGTGTTACATCGCAGAACATACATTAATGAATAACTTATAT

>160\_rnd-1\_family-163\_\_LINE\_\_CR1

TTTGATGAATGAAATTTGNGTAAAAATAAAAATCTTTAAAATATTAATAATATACCAAATTAAAAAAAGG  
AGCGATTATATATTTATGGTTTTAATAATTTTGGTGATCAGTCACTTGACCTCCATATGCAGGTGCTTGCCA  
AAAGTTGACCCATTTCGACCCAACGAGCTGCTGCAGGTAATAAGGGGTCAACATTCATTCATCAAAATCNT  
AAAAAAGAAGGGCGCGCGTCAGACGCGTGCCAATAATGATATTTTCTTTTTCGCCCCATGATCAGCCCATT  
CACAGACATTTGTATGTGTGTGTCTGTGTGTAGAGGTCCAAAATCAGAAATCCTAAAATCTTGTTAAATTT  
GCATCGGGGACAGGCAGGCAGGCAAGCAACAGGCACACAAGCGCATAAATGCTTCTATTTCATATACAAA  
ATATGCAAGTATGCGTGAATAGCGAGTCCAAAATATTTTAAATGCACACATGGCAACGCTTGGGTACCCT  
TACCAACGATAGCGAGCTAAAATGCAAGAATTCGCATCGACGTGGCAAACCCCTTTCTCTATTTCATATTA  
GCCGTGCCTTCAAAAAGGGTAGAAATGCCTCAGCATTTGAGAAAAAATTGAATTTGTGCGCAGTTTTGCTCGT  
CGGACAAATACACACACACACACATTGAAACGATCCCTAAACATAGAGAGAGCATTGAGAGCTGAGA  
GTAAGTGCGAGCGAGATAAAAAGTTAACAGCGTTGCCGTTCTATCGCACAAATCATATGGAAGAGAGTGCG  
CCAAGCACTTTCCTGTAGAGTAAGCGGTTCAAAAATACATCATATGTATATCTTACTCCCTTACTCGCGAT  
TTTGGACCAGATGCCTCCGATACTTTTTGTGACAACGCTGTTTGTATGTGATGTCCAGTCTATATGTTGTTT  
GGTTAGTGNTTGTATNTAGACTCTCTAGCCTTTAATTTTCAAATTATCGCCTTCACTGAGACCTGGCTGAA  
GCCGGACATCTCAGACTCTTCAATTTTACCTCCAAATACACCACTTACAGGTGTGATCGAGCTTCCCGNA  
TCGGNGGAGGAGTACTCATAGCNGTCGAGTCTGCTCTTTCGTCGGAACGCATTGATCTTTCCATCTCAGAG  
ATTGAGCTGGTGGCTGTAAGAGTTGTATTTGGAAGTTTCTCTGTCTTTATTTTCATGTTCTTATATGCCTTNT

ATCTAACTTGTCCACCTATCAAACCCATCTTAATGCTATTAATCTATCTCCTCCCTACTTTCTGATAGAGA  
CCTTTTAGTAGTTCTTGGGGACTTTAATCTTCCAGATGTCGAGTGGTCATCGCCATCAGACTTAACTTTCT  
GTTGCCGTCTTCGTCTAACGAATTTATTGATGGTCTACATGAAATGTCCTTACGGCAGGTTAATCGTGTGC  
GTAATTCAAGAAACAGATCTCTTGATCTTATTTTCGTGTTGAATTCGTTCAACAGTGTTGTGCACAGGATC  
AATAAGCTTACACTTCCTGAAGACCCTTTTCATCCAACCTCTGGAAATGGTCATTGGTTTACCAGCCCCGAGT  
CCCTATCAAGGATCCGCAATTAGTTGAACGTTTGCGTTGTTTCCGAAAGGCTTATTTTCATAAGCCAAATG  
ATCTTATTCTGCAAGTCCACTGGTCCCAGTTGTACAATTGTGCAGACATTGATGTTGCCATTAAACTTTTTT  
ATGATACCTTGNACTCTATTTTTGATGTCTGCGTNCCTCTTGATCACATAGCGAGGCCTGATAGGCCTCCCT  
GGTTCTCAAAGGAACTTATAAGGTTAAAAAATGTGACGTCGAAGTGTTATAAAAAAGTTTAAGAAATCGGG  
AAATCACTCTGATTCATCACGTTATGCAGTTGCCCGATAAAATTTTTCCACTCAAATTCATCTGTTTTAA  
GGATTACCTTCGGCGTTGTCGGCTTCAATTTTCACACAATCCTTGTCAATTCTAAACGAAAGACATATATT  
TTGCCTTCTTCGGTTAAGTTTGCAAATGAGAGCGCGAACACTGATCCGGGCATAGCCGATCTGTTTGCAA  
CTTTTTATTCCCTGAACACATTAAAAATGGGTATAAGGGTATATTGTATTTGTGCAAAAGCCAAATGTATG  
CAACAGGCAAGAAAATATCCCCGACCCCATAAAGTATATATATTCATGATCAGCACCAATAGCCGAGTCG  
ATCCGTCTGTATAAACGCAATGATCTCAGAGTCTATAAGAGCTAGAGACTTGAAATTTTAGATGTAGGTG  
CTCCTAGTGCCTGCACAGATCAAGGTTGTCTCCGATAATCGATAACTTACTCAGTTTCCAAGCAATCGATT  
TAGCGACCTTAACACTATCAAGCCTGGTGGTGTTCCTGCTTGCGTGCTTAGGTACTGCGCTGCAGCATTAT  
GTAAGCCTGTTTTACAACTTTTGAATTGTCCGTAAACACNTCANCATCCGACCATTGGAAGGAATCATA  
CACTATCTCTCCAAAAGAAAGTGACTAAGTCCTATGTTGAAAACATAAGAGGTTTTTCAAATTATCCG  
CTATACCTAAAGCTATTTAGCCATTTATGTAGTTCTATTATTTACCTTCTCAGCATGGGTTTCGTGAAGCGC  
AGATCTACAACCAATAACCTTCTTAAGTTTACTTCGTTTGTAATTGATGGGTCTAAGAAAAGAATGCAGAC  
TGACGCCATCTACACCGATATCAGTAAGGCTTTCGACTTTGTCAACCAATCCTTGCTGCTTCATAAATTAT  
GCCTTCTCGGCTTCCCAGTCAATCCTTTGAACTGGATTTCAGAGTATTTGCGTGATAGAACCCAAAAGGTT  
CTTTTCAGAAATTCGTTTTCTAAACGTATTCTGGTGACTTCCGGTGTTCTCAAGGTAGTGATCTTGGCCCCG  
CTACTCTTTTCATTAATGATCTTCCCTCGATACTGTCTCACTCTCGAGTATTAATGTATGCTGATGATGTAA  
AATTATGCTTTGCGCATAAAGACATGGCATCATGTCTTACAAGCGGACATTGATGCGTTTCAGGCTTG  
GTGTCTAGCCAACCTTTTAACTCATACTGCTCTAAATGTAGGGTAATGACCTTCTATAAAAGCCCTCAAT  
TGGTTTCCTACATCCTTGATAGCTTACCGGGCGAGCGTGTTAACGGTACTTCTAATTAAGTTAATGATCTA  
GGTGTCATCCTTGCTCATAAACTTAAATTCGACATGTGGCCGTGGTCAATAAGGCCAGAATAGTTATGGGT  
TTCATCAAGCGATGGTCAAGGAGTTTGACGATCCGTACACGACAAAAACACTTTATATATCTTTGGTACG  
AGCTATTCTTGAGTATGCCTAATGTAAGTGGTCACCACAATATGCCATCCACCAGGATAGCATTGAATCCG  
TTCAGAAACAATTCTTGTTGTTTGCCCTTCGTGGTTTAAATTGGGATCCTCGCGTGCGGTTACCGTCATACT  
CAGCATAACAGCAGACTTCTGATGATTAACCTTCCTTCTTGATTAATCGTAGAACCATGTTGGGTGTAATA  
TTTATTCATAAACAAATTACTGCTGAAATCAAATCTTCTGTGTTGACTAGCCAATTAATTTCTCTATACCT  
AATAGACTAACACGTAATTTTGTACCCCTATCGCTTTAATTTGGCTCAACTAATTATGCTTTGCATGAACC  
GTTTACGGGTTCTTTGTGATGACTATAACAAGCATTACAGAGTAATTTGGTCGGTATCTTCACTTCCTCGTAT  
AAAGTCTTCTATTCTAACTATTTAGCAAGTAGATAGTCTTATTTTTATTTGTAATTGTATTTGATGTTTTT  
TTCTTATTTTTTTTTTTTATTTAATTTTCATTTTCGTGTGCGTACGTTATACGACTGCGCCCCCGGTCGGTTGGG  
CTGGAGGTGGGATGCTGTACGTTGCATCAGGATTTCGCGTAATAAAAAAGCAATATAAATGGATTATTAAC  
TCTTTAGATCATCGTATAATGAATCCAAGTACACCTTTTGCCGATTGAAGCTGTCAAGTTTAAAAAGTAAA  
ATGCCATGGTGGACAGAGTCAAACGCCTTACTGAAGTCGGTGTAATGAAATCAAATTACATTTTCGAAA  
GGAAAGCATCATTTGCCAAGGAAGTAAGCTCTAGTAGATTGGTTCGTAGTTGACCGATTCTTTAAGAATCC  
ATGTTGATTTGCAGAATAGCTGCAAATTCGTAGTGATTTTTTTTTTAGGTATAGCGGACAGTTTGCATG  
CCTCTGTAATTTTGTATATCAGTCAATTTACCTTCTTGGGGAGAGGTATGATATAAGATTCTTTCCAGAG  
ATGGAAAGCCTGAAGTTTCAAGGAACAGATTAGCAATGGATGAAAAATGGAAGTACTATACCCCTTGAG  
AAGACAATTAGAAACATTGTTAGATTAAGAAGAAGAAGCCTACTGGAGTAAGATGGCAACCGAAGATTA  
GGGTCCCAATTTAAACCCCATCTGGCAAAAAGCAGAGACCAGATGCAAGAGNAGTTTCAAGAATAAGG  
CGAACAAAAAACTCTGGTTGCAATCGAAGCGAACAGACGAGTTTTTTTTTTGTGCTCTCTTGTTATGATTT  
TAATCAAACACCGGCCTTTTAATATTTATATTTAAAATATTTCCATTATTCTGTTTGCCCTTCTCGGTAAATTT  
TTTTTATTCTATCGCGCGTTCATGCTTGTGGCCTGTGCATATTATCATTTAAATATTGTTACTTGTAATAT  
GTCTTCTTGTGCACTTTTGTTTGTGCGCTTGCCTATTAGCTTCTATAGGTAAGCTTCTTGTTTAACTGCAC  
ATCTCTTATCTTGGTGTGCAAGAATTTGTGAGCAGGCAAGCAAATTAATATAGACTATTCTCGCTCTCGC  
GCTCTCTCACTGTTTTTTTCAACTTCCGCTTTGATATTGTTCTACTTTCTGCCGCTTGGTGCTCTATACGCTA  
TTAATCTAAACTGCTCTCTTTTTTAATTTGGCTGCGTTATTAGAGTAGAGACCCACGATAATGGACCATAA

AATTGACTTCTTCAAGAAAACCTTGCCAAATGCAAATTACGGCAAGTCAATTCAGCATACCTTGTGGCTGT  
ATCTAAATGTCGTGCATTCAAAATGTACGGGTTACACTGGCCTAGTGGGGGATGCTTTTGCCAAACACAAT  
GGTTTGCCTATAGTTGTGACTCGTGTAGGGAGATTAATGATAAAATGCGGGCGATTATACGTCAGACCA  
GAAGTGGCTTTAAGGGTCTGATTGTTGGTGTTCGTAAACTAAACGATAAGCTCACAAGCTTGGATACCCA  
ATTTAATATCCCAAAACTCTTGGATGAGTCTCCTGGGACTAAAAAGCCCATTCCTTGTGATTTGACATTGC  
CTAATACCCCTCAGCCTCCGAATGCAAATCTGCAGCCTACATCTCGTTTATTACTCCGGTAGCTGGGAGGT  
CTGCTGTGGACACTGATTCTGACCTAAGCTGTGTGAAATCGGCACGAGAAAACCAGTCAATTTATCCGTGT  
CGTCCGCTGTTCATAGAAGTTACGAAAGGGCGATGGCAACAATTAATTTACAACAGCCCCCTAGAAGGCTC  
GTCGTCCGGACTACCGGCTGCTTTAGGTACCACAGCTAATAGTGTTCCTACTGCCCTACCTGTGGCGCCTA  
CGCCTGTAGTGGGTGTTTTGTTTCTAGGCTTTCCCCTTACTTCTCATGAGATGGTGTAAGGCCTTTATACA  
GGTAAAAATGCAAGCCCCAGGTATAAAGGTGGAGAAATTTAAACGCGCCTATGAAAAGGATATTGCATC  
CTTTAATTTTCAAACCTACTGAGACCTGGCTGAAGCNGGACATCTCAGACTCTTCAATTTTAA  
CCTTCAAATACACAACCTACAGATGTGATCGAGCTTCCCGTATCGGTGGAGGAGTACTCATAGCTGTTCGAT  
TTTGCTCTTTCGTGGGAACGCACTGATCTTCCATCTCAGAGATTGAGCTGGTGGCTGTAAGAGTTGTATT  
GGAAGTTTCTCTGTCTTTATTTTCATGTTCTTATATGCCTTATATCTAACTTGTCCACCTATCAAACCTATTTT  
CTGATAGAGACCTTTTAGTACTTCTTGGGGACTTTCATCTTCCATATGTGGAGTGGTCATCGCCATCAGAC  
TTAAACTTTCTGTTGCCGTCTTCGTCTAACAATTTATTGATGGTTTACATGAAATGTCCTTACGGCAGGT  
AATCGTGTGCGTAATTCAAGAAACAGATCTCTTGATCTTATTTTCGTGTTGAATTCGTTCAACAGTGTG  
CACAGGATCAATAAGCTTACACTTCCCTGAAGACCCTTTTCATCCAACCTCTGGAAATGGTCATTGGTTTACC  
AGGCCGAGTCCCTATCAAGGATCCGCAATTAGTTGAACGTTTGCCTGTTTCCAAAAGGCTTATTTTCATA  
AGCCAAATGAACCTATTCTACAAGTCCACTGGTCCCAGTTGTACAATTGTGCAGACATTGATGTTACCATT  
AACTTTTTTATGATACCTTGAACCTCTATTTTGTATGTCTGCGTACCTCTTGATCACATAGCGAGGCCTGAT  
AGGCCTTCGTGGTTTTTCAAAGGAACTTATAAGGTTAAAAAATGTGACGTCGAAGTGTATAAAAAAGTTTA  
AGAAATCGGGAAATCACTCTGATTCATCACGTTATGCAGTTGCCCGATAAAATTTTCCACTCAAATTC  
ATCTGTTTTAAGGATTACCTTCGGCGTNGTCGGCTTCAATTTTCACACAATCCTTGTCAATTCTAAACGAA  
AGACATATATTTTGCCTTCTTCGGTTAAGTTTGCAAATGAGAGCGCGAACACTGATCCGGGCATAGCCGAT  
CTGTTTGCAAACCTTTTATTCCCTGAACACATTAAAAATGGGTATAAGGGTATATTGTATTTGTGCAAAAG  
CCAAATGTATGCAACAGGCAAGAAAATATCTCCGACCCCATAAAGTATATATATTCATGATCAGCACCAA  
TAGCCGAGTTCGATCCGTCTGTATAAACGCAATGATCTCAGAGTCTATAAGAGCTAGAGACTTGAAATTT  
AGATGTAGGTGCTCCTAGTGCCTGCACAGATCAAGGTTGTCTCCGATAATCGATAACTTACTCAGTTTCCA  
AGCAATCGAT

>160\_rnd-1\_family-96\_\_LTR\_\_Gypsy

ACAATGATAAGCGACAAAATAAAATAAAATAAAATGAAATTTCAAGAAATATATATATATTCTTATT  
ACCAGAAATGCCTATTAATAAGTTTGCGATAGAAGTATATTTAGAAGCAATATATAATAGCGACGCAGAC  
TTTAGAATTCGTGCATTGAATATTCTACAACAATAAGATAAAAGGCATAATTTTAAATACACTGCCATATG  
TTGGCATTAAAGAAATAGTGGTCCAGTGGACGGCGAGTGCCCAATTATAATGGTAAAACCTTCATAAATAG  
AGAACTATGGAATGGAGTGAATTAGCGAAAAAAATAAATAATTTCAAAGATAAATTCGAAAAATCTTATA  
AGTGTGTTAATAAGAACGCACCTATAAGGGTTGAAACGCTAATTCACCACATAAACATATTAGTGCTAAA  
CTATAATAACATAGTTCAACTTTATTTAAGTAAAGAAAATAGGCTTACAGAGCAGCATGTAAATCAATGT  
AAGAAAATAATCAAATCACTTGGGACTAGAATATCGAATATCAGCACTAGGCACAACATAGTAATAGATA  
TCCCAACAGATTTAAAATTAATGGCAACTTTTGAACCAGATCAACTAGAAGAACTGAATGAGTCTAAGCC  
AACACTAAATAGTGACCCTGATATTGAAGCTGATAGCGACATTGACCCACTTGAATTAACAGAACCAAAC  
ATGGCAGTAAATCAAGTGGCCTTAGACCGCGAATATGTAAGACAGGTATCGTCTACAGTCCCGGAATTTG  
ACGGCGAAAAGCCGTCCTGAGGCTGATTTCTAACGGCTTTAAGACTNGTCGATCGTACTAAAGGTACACG  
AGAAGACTTAGCCGTAGAGGTCATAAAGTCNAAAATAATTGGCCCAATTCTGTACAAAGTACAAAATGAA  
ACNNCNATTANCGGNATTATNAATAAATTAANACCGNNGTCGNAGGCGAGTCAACCGACGTTATCAAG  
GCNAAGTTGCTTAACATAAAGCAGAAAGGCAAGNCAGCCNCGCAATNTACAGCTGAAATTGACAGTTTG  
CGTAAGCAACTNGAAGCAGCCTATATTGACGATGGACTAGATTCTGATAACGCNGAGAAATTTNCTACTA  
AAGAAACAATATCCGCCATGACAAAGAATTGCGAATACGAAAAGCTTCGCATAATATTAGAAGCGGGCA  
ATTTACAGCAATTTTCGATGATGCCGTGGGTGAATACATCCGATGCAGCACNGAAATGACTGGAAGCCCGAG  
TACAGTATTGTACTACAAAGGCAGAAACNATCGCGGNAATNACAGCCGTAACAACCAAAGAGGTAGAGG  
CAATGGCCGCGGCAATAGTAATTTCCACTACAANGGTAATAACAACNACAGGGGTAATTTACAGAGGAAAT  
TACCGNNGGTGGCAACCGAGGNAGAAACAATTCNAACCGAGGCGGCNACCAAAACCAAAACAATAACAAT  
AGAGGTAATGTCCGAGTAACCTCAAGGTAATTTCGGAAAACCAACAAAACCCCTCAGATGTTTCAGAGCCAAT

AAATGGCGCAATAAAAAACCATCAACCTTAATCTNAGCATATTTTGTA AAAANTTAACAATGAAAGAACAGGT  
AAATCANTTGC ACTNNTAGTAGATACTGGTGCAGATATATCCATATTAAGGAAAAATNCAGATATATTCG  
AAAATGTAAACGAAAAAATTACTACCCAAATATCGGGCATTGGCGAAGGCATAATTCNTTCAAAAAGGCTT  
GGCCTTTATAGAACNCACTACAGGTAAATACATAATTCCACATAACTTTTCATTTAGTCGATCAGAANTTCC  
CAATACCTAGTGATGGCATACTAGGCATAGATTTTCATAAAACAATATAATTGCCAATTAGATTTCACTCAA  
AGTGGCGACTCGCTCATTCTTCGCCCAAACA ACTTAAATTATCCAATTTCGATTACAAATACTTCATACTTG  
TGGCAATAATGCCACAGTACTCCCAGCTNGTTCCGAAGTTGTCCGTGAAATACAAATACCCTCAATANAA  
AATCGAATTCTGATACCAAATCAAGAAATTAANGAAGGAATTTACGTGCGAAACACATATCCAACCACAA  
AAATGCATNTGTCCGATTACTAAATACAACAAGTACCGATCAAATAGTAGACATTAAATAANTTGAAATA  
TGAACCANTTTCGAACTACGATATAGTTCAAAAAGAAACCAACGAAGGAAGAGACA ACTNCGTTATGNCA  
AAATTA ACTAAAACTTTCCACCNCTATTCAAAAATCAATTA AAAAGACTTATGCACCAGATATACCGACA  
TATTCGGACTNGAAACCGAATCGATAACAACCAATAATTTTTACAAGCAAAAAGCTNAGATTGAAGGATGA  
TGAGCCCGTATACATAAAAAAATTATAGAAGTCCTCACAGTCAAGTAGACGAAATTCAAGCCCAAGTNCAA  
AAATTAATNGACGACAAAAATAGTCGAACCGTCAGCCTCAGAATATAATAGCCCACTTTTACTAGTCCCGA  
AGAAGTCTCTTCCGGACTCTGANAAGAAAAAATGGCGATTAGTAATTGACTATCGTCAAATTAATAAAAA  
GCTATTGTCCGATAAATTTCCGCTNCCTAGAATTGATGATATTCTAGATCAACTAGGTAGAGCAAAAATATT  
TTTCATGCCTNGACTTAATGTCNGGNTTTCACCAAATTGAACTCGAAAAAAGTTCTAGAGATATAACGTCN  
TTTTCAACGAGCAATGGCTCGTATCGCTTCACGCGATTACCATTTGGCTTGAAAATAGCGCCAAATTCNTT  
TCAAAGAATGATGACNATAGCATTCTTCTGGNCTNGAACCATCNCAAGCNTTCCTTTATATGGATGATCTAA  
TAGTAATCGGTTGTTCCGAAAAACATATGGTCAAAAACCTTA ACTGATGTTTTTGACAAATGTAGGAAATN  
CAACCTGAAACTACATCCNGAAAAATGTTCA TTTTTCATGCATGAAGTCACATTTTTGGGACACAAATGCA  
CNGATAAAGGAATCTTGCCAGACGACAAAAAATACGACGTCATNAAAAATTACCCAGTCCCACACGATG  
CGGACAGCGCTAGACGATTTCGTTGCATTTTGCAATTACTATAGGCGCTTTATNAAAAATTTTGCCGACTAT  
TCACGTCACATAACAAGATTATGTAAAAAAGACGTTAAATTCGAATGGACAGCTGAATGCCAGAATGCCT  
TCGAACATCTCAAAACGGCACTAATAAACCCAACTTGTTACAATATCCAGATTTACCAAAGAATTCTGC  
ATAATAACAGATGCAAGTAAGCAAGCGTGTGGAGCGGTTTTAACTCAA AACCATATGGACTCCA ACTTC  
CAATTGCATACGCATCAAGATCCTTTACTAAAGGAGAAAGTAACAAGAGTACNACTGAACAAGAATTAGC  
GGCTATTCAATTGGGCAATAACNCATTTCCGACCATATATTTATGGTAACCATTTACGGTTAAAACGGATC  
ACAGACCACTAACATACTTATTTTCAATGGTAAATCCAAGTTCAA AATTAACGCGTATGAGGCTTGAATTA  
GAGGAGTATAATTTTACGGTAGAATATCTGAAGGGTAAAGACAATTNCGTAGCCGATGCGTTATCAAGAA  
TAACCATNAAAGAGCTACAAGANATAACAGGAAAAATAANGAAAGTCACTACAAGATATCAAAGTAGAC  
AAAANTCCTGCGCAGGAAAAAANGAAGTAGAATTGCCAAGGCAATCTATAGAAAAAGCTTCAAAGCCCA  
ACGTATACGAAGTCATTAACAATGACGAAGTACGTAAAGTAGTGACCTTGCATGTAAAAGATATGCTATG  
TTTCTTTAAACATGGTAAGAAAATTACNGCAAGATATGATGTTAGCGATTTATATACNAATGGAANTATTG  
ACTTAGGTCAACTNNTCCAAAGGCTCGAAAAGGAAGCCGGTATATATAAAATCAGCCAACTCAAAATGGC  
ACCGTGGGAAAATATCTTTGAACANGTTTCAATAGATAATTTCAAAAATATGGGCAATAAAATATTGAAT  
ACATTGAGAGTAGCGCTACTCAACCCGGTGACCACAATAACAAACGATAAAGAAAAAGAAGCTATATTG  
TCTACACTACATGACGATCCAATACAAGGAGGTCACACAGGCATTGCAAAAACCTTGGCCAAGGTCAAAA  
GACATTATTNTTGAAAGGTATGACTCGAGATATNACTGAGTACATACGNAAATGTCNAAATGCCAGAA  
AGCAAAAATAACAAAGAATANTAAGACCCCTTTAACAATAACTGATACGCCGATACACGCTTTTCGACAGA  
GTNATAGTGGACACAATTGGTCCGCTACCNA AATCAGAAAAATGGNAATGAGTACGCAGTCACGCTAATTT  
GTGACTTGACTAAATACCTAGTCGCGATACCGATCCCAAATAAAAAGCGCNAGCACNGTNGCNAAAGCNAT  
ATTCGAATCATTTATTTATTCTGAAGTACGGTCCAATGAAGACGTTCA TTACGGACATGGGAACGGAATAT  
AAGAATTCAATTATAAACGATTTGTGCAAGTATNTGAAAATAAACTAACATCAACTGCACATCATCACC  
AGACAGTTGGAACAGTAGAAAGAAGTCACAGAACTTTTAACGAATACATACGATCATATATATCAGTTGA  
TAAAACTGATTGGGACGTATGGCTCCAATATTTTCGTTTACTGTTTCAACACGACCCCCCTCTATGGCACATA  
ATTATTGTCCATATGAGCTAGTNTTTGGTAAGACANACAATCTACCAAAAATATTTTAATAGCATAGATAAC  
ATAGAACCNTATATAACATAGANGATTACGCTAAAGAAAGTAAGTATAGATTAGAAGTAGCATACAAA  
AGAGCTAGAANTATGCTNGAANNAAATAAATAGAAAAATAAGGAATTATATGATTTAAAAAACTAGGAGA  
TAAAGTCTTACTAAGAAATGAAGCAGGCCATAAGCTAGATCCTAAATACACNGGGGCCCTATAGAGTAGAA  
AAAATAGAAGATAGNGATAATATAATAAAATNAGAAATAAGAATAAAACGCAAACAGTTCATAAGGATA  
GATTAAAAAATTTTAAATTCATAAAAAGACATACAAGAAAAAATGAATTATACAAGGTACGCAAAGAAAA  
AATAAAAAAAACTAAATACATTATAAATACATTACAAATATAATAAATCTTCAAATATCAAAAATTATTTT  
AATATAAAACAAATTTAAGTAAAATAACTCCATTTAGTACGTTAGGAGGGAGATGTAGTATGTGCATATA

TTGAGGGGTACACTGTACCAATAAAGTAACATCGTTTAAGCATAAATANATCAGCAACACATTGTTGCAGT  
ACACAAACAAAACCNTTTCAAGTGAGCGTGTAATATGATCGCCCGCTTATGAGCTACGCTAAGTCAGCAG  
TCCCACGCTGACCATTCTGTAGCACATATATATATATATATATATATATACATGCAAATATGTACATA  
AGACTCTCTCTCTCCCGATTATGCTGATAAGACAAAATATGTATGAAGCCGCTCCGCTGCTGGCGTAACCG  
GCAGCGCAGCTATGCGGTCTTAGCCATAAGAATATATTGAATAAAACATTCTAAAAAACTAAAGTCAAACG  
GCACAGACGTGCTAGATTCAATTAGCTCGTACCTATTACGTACTACCTCGAGTTTACAAGAGAGCACTTGGA  
GTACGTGCACAAAAAAGCAGCAGAATCCTGTCGAGCGCTATCCAGGATTATGCTCAACACTCGAGGTCCA  
AAACAGCAGAGACGCAGTCTTCTCATGACAGTAAACAAAGCGGTAATAATATACGCGTCCCCCATCTGGA  
GCAGAGTAATGGCTGTTCTAGCTACAGCCGGAGTATAAATTCTATATATCGCCTATGCGCTCTACCGGTC  
AGCTGCGCATTCCGGACGGTATCAGGATAAGCAACGCTGGTTTTTCGCAGGGATGGTCCCGTTCAATGAAC  
TGGCAACAGAAGCGGTAGTTTTCTACAGAGCTCTGAATGGAAACAGCACAGCAAACCTCGGTTTCGCACAGC  
AGCAAGGATGCAAAGCATGGAACGATGGCATCCACGTTGGGATCGCTCATCTAAAGGACGCTGGACACA  
TAGGCTTATCCCTAACTTGGAAGCCTGGATAAACCGCAAGTATGGAAACACTAATTTCCACTTAACGCAG  
CTCCTATCTGGCCACGGATGCTTCTAGAGCTACTTGAACCGATTTCGGCCTCGATAACACAGACGAGTGTTT  
TTGGTGCGGCAGTGAAATCGCAGAAAGGCTCCTCACTGTAGGAGGGGAAAAACCAGCAGTGCGGCATATC  
AACCTAGATGTGAAAGATGATATTGCCAGGGTGAAGGTGATACAGATGGCAGCAACTGCTAAACTACCA  
AGTGAGCCAACCTCCACTAGGAAGCCGACGCCAGCAGATCCGAGAAAACACACCGGCTAAATGTAGATA  
AACTCAGGATCACAGAAAAAAATCAGCTCACAAAAAACAACAACAGAGGGCCTGGAAATCACAAATGTT  
TAAAAGGCGGTCCCAAGAGGGGTTGAAGCCTTACCCGAGCTAAGGAAAGCATATCGCAGAACACAGACG  
GCTACCATGCTTCTACCCAAGATCGCAGCAAACGAACCTTCTGAAGAAAGCGAAGAAACGCATTGGCTGGG  
TTGTGTACCGTATATGCCAAAAATTGGAACCAAGAAGATGTTTCCAGTGCCTGGACCTTGGGCACACGGC  
TGCGCGATGCATTAAAGGTTTGCATATGCAAGCCAATGCATAATCTGCACAAGGCACGAGACTGCGAACA  
CGGCAAACAACACCCTCAGCCATGCCTGCTCATGGTTAATCAAGGCGTCTCAGGCAACAATCAAAAATTA  
AGTTAATACAAATTAACCTGAACTATTGCAGAGCGGTCCAGGACCTACTCGCTCAAACCTACACGGGAAGA  
GAACGCTTACTTCGCCATCGTCAGTAAACCACACCAGTCAAACATGATGGCATCTGGATTTCAGAGCAACG  
GCGGCCAAGTATTGCGAAATATGTATATATATATATATATATATAGTTGCTATATTGCACCCAGCATAGGA  
ATTACCGCGTTTCGCCGATATACTG

>160\_rnd-5\_family-10007\_\_RC\_\_Helitron

AGTTGTCAGTTTTGAATAAAGCTCGTAGACAACAAGCTAGAAATGAGCTAAATAAGTCTAATTCTGAATA  
TGCTGAGCATGAACGTATCAACAATATAGAGTCCCAACGAGAGCGTAGGGAAAATGAAGGTTTTAGCCA  
AACTGAGAGAAATAGGAATAGGCAAAGAAACCAAGTTCGCAGACAATACAGAGTTTACAGGGCAAACGA  
ACAAAGACAAAATACTGTAGACCACTCGAGTCGACGAGCTAATTCTCCAGTTAGAGAACAGGAGCAATTG  
GCTAATACTTCGCGTCGATCGACACGCAGACGAGACCCAGCCTACCGGGCAAACGAACAAAGACAAAAT  
ACTGTAGACCACTCGACTCGACGAGCTAATTCTCCAGTTAGAGAACAGGAGCGATTGGCTAATACTTCGC  
GTCGATCGACACGCAGACAAGACCCAGTCTACCGGGTAAACGAACAAAGACGAAATACTGTAGACCACT  
CGACTCGACGAGCTAACTCTCCAGTTAGACAACAGGCTAATACTTCGCGTCGATCGAGACGCAGACAAAA  
CCCAGTTTATTGGGCAGACGAACAAGAACAAGACAATATTCGTCGAGGTCGCCATCGACAAGACATAGA  
ACGACGACTTTTAGAAAGAACTAGGGATCGGAATCACAGGTTAAAGAGAATCCGATTTCGTAGGATAATTG  
AGCAGGAACGTAACACAAGTGTAAGGCGAAGTGCTCGCATTTCGTGCACGACAGGAGGCTTTTGACGCCA  
ATAGAAGTTTGTCCCAGCGAGTTAGCCAGTGTAAGGAGTAATACAGGTAATAGGATAGCAGAGAATAGGC  
GCAATGCGACGAGGAACAGGGGTGAACGTGCGATTAGTTTTTCAGAGGATAGAATCTTTCCAGCTATTAG  
GATTAACTTTGATGGTCTGATAGCTGGATTCAATAGAACAGTTAAGTAGGGTCCCGATTAGGTTTGCTTTT  
GTTGCGAGGGCTTATGGTTTCCATATCAAGTGACAAATTTTCTCGTGAGGTTATTGAAAGGAAGTGTAAGT  
GCGGAAGTAAGCTCCGACACTTTATATCTTTTCACTATATTTCCCTCTGTTAATAATAAATATAGTTTTTGC  
AAAACGTGTAGTCGTAGCATTAATTAGGCAAAAAACGTAAAACCTTCTATTGCAAATGGCCTAGATATTC  
CCGATCTGCCAGATTGTTTGAACGGACATGGCTATATCGACTCGGCTGTTGATGCTGATCAAGAATATATA  
TACTTTATGGGGTCGGAGATGTCTCCTTCTATGCGTTACACATTTACGACCAAATTATAATATCTCTGCA  
AGGGCATAAAATGTCATATAGTAAAATTTGTAATTTAAATTAATTAATTCCAATAAAATTATTTCCCATATA  
ATTTATTAAAATTATACTATATGTATGTATTGATATATATATTTATTATTTTGTATATGTCTGGAATAAAT  
AAAAAGTTGGTTATATTTGTATAGTTTTTAAAAAAAAGACTAAAACCTAAAGTTATGTTTAAGAACTTGA  
GATTTTTGCTATTTTCGCATAAATGCATAAATNCTTGCACATACACGCCAAATTGTAACGGCCGAAAATTAT  
GTTTGTGATAAATCACTTCTTTTTTTTTTAAATGGTCACAAAACACTTCAATTTATTTTCAACCGCTTG  
AAACCGATAGAAAAGTTTATTTGAATAAAAATCGTTGTAGATCAGTAAGAAACGCAAAAATCACAAATTC  
GGCGATCGAAAATCGACAACACGCAANATTCTGTAGTGTCCTGGCCAAACAGCATAAAACAGAAAAGTC

TAATCTGTAGTANTTTTAGTAGTTTTTCAAACATTGTTTTTGATTTCCAGATTTTATGGCAAATTTATGAA  
TTTGCAGCTGGTCAGATGCAGATGCAGGTGCTTTCCATAAGTTGACCCTTTTCGGCCCAAATGCTGATACA  
GATACAGGTCATGCACCCATGATCTGCCATTACACATTTATGGGTGTGTGTGTCGTAAATCAGAAATCC  
CAAATATAGTCAAATGCGCATTGGACAGGTAGGCAGGCACCAAAAGGCACAACCTTTTTTGTACCCTTTG  
GGTTAGTGGTAGTGTGATGGCAATCGCAGGCTACAGACTAAATCGATTACTGCTTCTTCGGAGCACATTG  
AAAGAGAGTGTTTCGGAAATATTTCACTCTCCTACCGCCACGATTTAGTATACATATCGAACTGCGCGCGCTA  
CTTAGCTTATTATTATAATCACATATTAACATCACATTATTATTATAAGCACCTACATCTAAAATTTCAAG  
TCTCTAGCTCTTATAGGTTCTGAGATCCTTGCGTTCATACATACGGACGTAAGGACCCAATGGGAATAAAT  
GTATATTGCATTTGTGCAAAATCCAAATGTATGTAACAGGCAGAAGGAAGTATCTCCGACCGCATAAAGT  
ATATATATTCTTGATCAGCATCAATAGCCGAGTCGATCTAGGCATGTCCGCCCGTCTGTCTGTCTGTCCGT  
CCGTCCGTATGTATGAACGCAAGGATTTCAGAACCTAAAAGAGATGTAGGTGCTCCTAGTGGCGAGTTTA  
TTTCCGAAATTCGATAACTTACTCCGTTTCCAATCAATCGATAAAAATCGATGTGCGATATCCTTTTTTTGGG  
CAATTTTGGTAAATAATAAGAGCTAGAGTCACCAAACATGATATGTTGCTTTTAGAATATTATATATATAT  
CAAGTTTCTTCAATTTATACCTAACGCCACCTCCCCGTTAACACCCGCAGCTCTGTAAAGCAAGTTAATAAC  
CCAGCCTTTATTGTCAACCAATTTAAGCCACAATTTAAATTCAATTGACTTTTTTAAAATACACAAATATTC  
TATACTACCATAAGATATACTGTAGAAAATTTTATAAAGATCGGTTAAGAAAAAAACAAAGTTATATGTA  
ACTGCGCAATTGGATGGGCAGCTAGCGAAAACATCAATGCAACAACCTGCATTTGGTGTTGGAATAAGAGA  
GTTTCAGCGTATTCCCTAGTCGGGAGCTCCCGACTAGAACCTCCTACTTGTTTTCATATTGCCGTAAAGAAT  
TGCAACATTTAAGTTGTATGTTAAGACATTTTGATTTTCAAGATATCTTAACCAAACCTCGGTATTTATTAGT  
ATGACTATACTCCTCATATATAGGCCAAAATCTTATTAAGATCGGACCACTATATCATATAGCTGCCACTGG  
AAAGATCGGTGCAAAAATTCAGTTCTTGATGAAAAAATTGTTTGGCTCTCACGAAATTTTGAACAAATAA  
ATTTTGTTCCTGTGCTTCTTAGATATGAGCATTATGAGTCATCAGTGGAATGATAATTAACGTCGGATTAA  
TAAAGGCTCTTTTTATACCCTTGAGAGGGTATTATAATTTGGTCGCGAAATGTGTAACGCATAGAAGGAG  
ATATCTCCGACCCCATAAAGTATATATATTCTTGATCAGGATCAACTGCCGAGCCGATATAGCCGTGTCCG  
TCTGTCCATCTGTATATTTCTATGCGAACTAGTCTCTCAGTTGTAAAGCNATCTTAATGAAACTTTGCAGA  
AGTCCCTCTTCATGTTGCACGCAGCACATATGTTAACACCAGCTGGATCGGACCACTAAGTTGAAAATTAA  
GTTTCTGTATGAAAAAACATTTTGTTTATGAAGATATCTTGACCAAACCTCGGTATTTATTAGTTTACTATG  
CTCCTCATATATATGCAAGATCCTATTAAGATCGGACCACTATATCATATAGCTGCCATAGGAACGATCAG  
TAGAAAATTAAGTTTTTTGTATGACAATACATTTTGTTTATCAAACACGGCATTTCAGTAGTTTTACTATGCTC  
CTCATATATATGCAAGATCCTATTAAGATCGGACCACTANATCATATAGCTGCCATAGGAACGATCGGTA  
GAAAATTAAGTTGTTGTATGAAAAAACATTTTGTTTATCAAGATATCTTGACCAAACCTCGGTATTTATTAG  
TTTTACTATGCTCCTCATATATATGCAAAAACCTTTTAAGATCGGACCATTATTTTCATATAGCTGCCATAGA  
AACGATCGGTGCAAAAATTAATTTTTGTATGAAAAAACATGTTGTTTATCAAGATATCTTGACCAAACCTCG  
GCATTTATTAGTTTTACTATGCTCCTCATATAAATGCAAGATCCTATTAAGATCGGACTACTATATCATATA  
CCTGCCACAGGAACGGTCGGTCGAAAATTAATTTTTGTATGAAAAACATTTTCTTTATCAAGATATCTTG  
ACCAAACCTCGGTATTTATTAGTTTTACTATGCTCCCANATATATGCAAAATCCTTTTAAGATCGGACCAC  
TATATCATATAGCTGCCATAGAAACGATCGGTAGAAAATTAAGTTTTTGTATGAAAAACATTTTGTTTATC  
AAGATATCTTGACCAAACCTCGGCATTTATTAGTTTTACTATGCTCCTCATATATATGCAAGATCCTATTA  
GATCGGACCACTATATCATATAGCTGCCATAGGAACGATCGGTAGAAAATTAAGTTTTTGTATGACAAAC  
ATTTTGTTTATCAAGATATCTTGACCAAACNCGGCATTTATTAGTTTTACTATGCTCCTCATATATATGCAA  
GATCCTATTAAGATCGGACCACTATATCATATAGCTGCCATAGGAACGATCGGTNGAAAATTAAGTTTTTG  
TATGAAAAACATTTTGTTTATCAAGATATCTTGACCAAACCTCGGTATTTATTAGTTTTACTATGCTCCTCAT  
ATATATGCAAAATCCTATTAAGATCGGACCACTATATCATATAGCTGCCATAGGAACGATCGGTAGAAAA  
TTAAGTTTTTGTATGACAANACATTTTGTTTATCAAGATATCTTGACCAAACNCGGCATTCANTAGTTTTAC  
TATGCTCCTCATATATATGCAAGATCCTATTAAGATCGGACCACTATATCATATAGCTGCCATAGGAACGA  
TCGGTAGAAAATTAAGTTTTTGTATGAAAAAACATTTTGTTTATCAAGATATCTTGACCAAACCTCGGTATT  
TATTAGTTTTACTATGCTCCTCATATATATGCAAAATCCTNTTAAGATCGGACCACTATATCATATAGCTGC  
CATAGGAACGATCGGTAGAAAATTAAGTTTTTGTATGAAAAACATTTTGTTTATCAAGATATCTTGACCAA  
ACTCGNCGTTTATTAGTTTTACTATGCTCCTCATATATATGCAAGATCCTATTAAGATCGGACCACTANAT  
CATATAGCTGCCGTAGGAACGATCGGTAGAAAATTAAGTTTTTGTATGANAAAACATTTTGTTTATCAAGA  
TATCTTGACCAAACCTCGGTATTTATTAGTTTTACTATGCTCCTCATATATATGCAAGATCCTATTAAGATCG  
GACCACTATATCATATAGCTGCCGTAGGAACAATCGGTGGAAAATTAAGGTNTTGTATGGAAAACNTTTT  
GTTTATTCAAGATATCTTGACCAAACACGGCATTTANNGGTTTCACTATGCTCCCCNCATNTNTGCAAAAT  
CCTATTNAGATCGGACTACTATATCATATANCTGCCATAGGAACGATCGGTAGAAAATTAANTTTTTGTAT

GAAAAACATTTTGTATTATCAAGATATCTTGACAAAACTCGGTATTTATTAGTTTTACTATGCTCCTCATATA  
TATGCAAGATCCTATTAAGATCGGACCACTATATCATATAGCTGCCATAGGAACGATCGGTAGAAAATTA  
AGTTTTTGTATGAAAAACATTTTGTATTATCAAGATATCTTGACCAAACTCGGCATTTATTAGTTTTACTATG  
CTCCTCATATATATGCAAGATCCTATTAAGATCGGACCACTATATCATATAGCTGCCATAGGAACGATCGG  
TAGAAAATTAAGTTTTTGTATGAAAAACATTTTGTATTATCAAGATATCTTGACCAAACTCGGTATTTNTTA  
GTTTTACTATGCTCCTCATATATATGCAAGATCCTATTAAGATCGGACCACTATATCANATAGCTGCCATA  
GGAACGATCGGTAGAAAATTAAGTTTTTGTATGACAAACATTTTGTATTATCAANATATCTTGACCAAACT  
CGNCGTTTANTAGTTTTACTNTGCTCCTCATATACATGCAAAATCCTATTAAGATCGGACCACTATATCAT  
ATAGCTGCCATAGGAACGATCGGTAGAAAATTAAGTTTTTGTATGAAAAACATTTTGTATTATCAAGATATC  
TTGACCAAACTCGGTATTTATTAGTTTTACTATACTCCTCATATATATGCAAGATCCTATTAAGATCGGACC  
ACTATATCATATAGCTGCCATAGGAACGATCGGTAGAAAATTAAGTTTTTGTATGACAAACCATTTTGT  
ATCAAGATATCTTGACCAAAACNCGGCGTTTAATAGTTTCACTATGCTCCTCATATATATGCAAAATCCTAT  
TAAGATCGGACCACTATATCATATAGCTGCCATAGGAACGATCGGTAGAAAATTAAGTTCTTGTATGAAA  
AACATTTTGTATTATCAAGATATCTTGACCAAACTCGGTATTTATTAGTTTTACTATGCTCCTCATATATATG  
CAAGATCCTATTAAGATCGGACTACTATATCATATAGCTGCCATAGGAACGATCGGTAGAAAATTAAGTT  
TTTGTATGACAAACATTTTGTATTATCAAGATATCTTGACCAAACTCGGCGTTTAATAGTTTCGCTATGCTC  
CTCATATATATGCAAAATCCTATTGAGATCGGACTACTATATCATATAGCTGCCATAAGAACGANCGGTA  
GAAAATTAAGTTCTTGTATGACAAACATTTTGTATTANCAAGATATNTTGACCAAACTCGNCGTTTANTAG  
TTTTACTATACTCCTCATATATATGCAAGATTCTATTANGATNGGACCACTATATCATATAGCTGCCATAG  
GAACGATCGGTGCAAAATTAAGTTTTTGGAAAGACAAAACNTTTTGTCTNNTCAAGATATCTTGACCAAAACN  
CGGCATTTAANGGTTTCACTATGCTCCCCNCATNTNTGCAAAATCCTATTNANATCGGACTACTATATCAT  
ATANCTGCCATAA  
>Ref\_DROGYPSYZ  
AGTTAACAATAAGCATAAATATATTGCCCTAGCAATTAAGTAGCTTCGTATTAACAATGCTGACGCGCC  
AGAAGTGAAGTTCAGCGTCTGCGCTAAGAACGGCCAGCAGCGGTAAGCTGACACTGCATGGAATGCTGAGT  
CGGCTTGCCGACCATGCTTTGATGGCGTGATGCATTGAGGCTTAGGGTATTTGTATAATTTGCTTGTCCCCT  
AGTTTTTAGTTTTATATGAAGCGCGCAACACATAAGTCGCCGAAATAAATACTGCTCCGGCATTGCCGA  
TAAACATATCTTTCGTAATATTACTGGATCAAGGAGAACATATTTTGATCAAGGGCAGCGCGGGATCAA  
CGCAACTTACCCAAGATAACATTGTGTTACATCGCAGAACATACATTAATGAATAACTGGCGCCCAACCA  
ATAAATAGGAACCCATACCATGTAAGTTCAATAAGTGATTTCAGTTTGAAGAAATTATTCACGAACGCCA  
CGTACCGATACGTGTGATTTTTAAAAAAAAAAAAAAAAAAAAAAAAAATTGTAAAGTAAAGTAAATATTGCTG  
CTCTCTTCTGCCAGCATTTTCATTCCTTTAAATCATTGCATACTTTCACTAAAAACTGTTGCATACTTTTACC  
AGCGTTCCTTGTCAATAAAGCATTGCATACCTTAAACGAATAATTATTGCATACTTTTCGGCAGCATTACAT  
TTTTTGCTGCATACCCCTAACAATTTTTTATAATAAATATTGCATACCCCAAGATTCACCAGTTTCCACTAT  
TGCCAACAGCGTTACCTGCCGATCTTCTCGATCGGCCTAAGTTTGAAAAGTGCCAACCATAAGCCAATGA  
GTTGGAATTATAGGGAGATAAAAGTCGAATATAATAGTGACGATAGCTGGGAGGGGGGAAATCAATTGCT  
CAGTAGATCCTACTCCTGCAGATACCGTTGTAAGTGAAGAAATGGAGCCGGCTCAAGTTCAGAATCTCAT  
TGAGGGTGCCATCAGGCAAGCTTTAGCGCAACAACAAAATCAGTTTCAAGCACAAATAACCGCTTTAGCT  
TCACAAGTACAGAGTTTGCAGGTGGAGGCGCCGCAATCGTCACATACGAGAAAATATCCGTCGATCCAA  
ACGCCAAATGCGATATTCCCTTGGACATTATTAATCTGTGCCGGATTTCTCCGGCGGTACAGGATGAGTAT  
GTAGCGTGAGGCAAGCAGCCATCTACGCGTACGAACCTATTCAAGAACTATCCAAAGAGCACTGCACACT  
ACCAAGCGGTACAGTTCATTAGGAACAAAATCAAAGGCCAGCTGGAGCCTTACTAGTGTCTCACAACAC  
TGTCCTAAATTTTCGATGCAATACTAGCTAGGCTAGATTGCACATACTCGGACAAAACATCCTTGCGCTTGC  
TGAGACAATGTTTGGAGTTAGTTACGCAGGGCGAAATGTGCCTGATGCAATACTACGATGACGTCGAAAA  
GAACTCACGCTCGTAACTAACAAAATTGTAATGTCTCACGACCAAGAAGGCGCGGATTTGCTCAACCGG  
GAGGTCAGAGACGACGCCTTGCACGCCTTTATCTCCGGTCTTAGGAAGCCGTTGAGAGCGGTTGTGTTCCC  
TGCACAACCAAAAGATCTACCATCCGCTCTGGCCCTTGCCAGAGAGGCAGAAAGCTAGCATTGAGAGAAGC  
ATGTTTCGCGAACTCTTACGCTAAAGCCTTGCAAGACCGAGCGCAAATTGCTGAAAGTAACAAAAACCGTG  
CCCAAGGCAAGCAAACCAGATTAAACAAAGATGAGCAAAATCAGGAGAGAAATCCCCATTTTGTGAAAC  
GCCAAAAGGGCGGTCCCCAGCCCCAGGCCCTAAAGATAATCAAAGTGGGCTCCACAGCCCATGGAAG  
TTGACTCTTCTCCAGATTTAGACAAAACCGACTACAGTAAGTCGTACGGCTAATGAGTCCAACGCACC  
AAAACGCAAGAATTCGTACAGCCGTTCAACAGGTCAAAGACGACAACGCGTTAACAATGTCGTACAATCA  
GATTCCAAAGAAGCCGTAACAGAATTCGAGAAGGCGGCCAAAGAGGCAGTTGAAGAAGTAGAGAGTGAG  
AACGAGTACGCACCTGGTGACGACTCGATTAATTTTTTAGGGAACACTCCCGGCTTCCGTACATTGAACGA



CGGTTGGCTGGGAGAACTCTGAAGATGTTGATTGACACTGGCGCGGCCAAAAAATTATGTGAAGCCCTTAA  
CAGAGCTAAAGACCATAACGCCGGTTCGCCAAGTCATTCTCGGTAAACTCGATCCACGGGTCTACCGAAAT  
CAAGCGCAAATGCTTGATGAACATTTTCCAACATACCTCCCCGTTTTTTCTCCTCGATACTCTAAGTTCTTT  
CGACGCCATCATAGGCTTCGACTTGCTAACACAAGCCGGAGTCAAATTGAACTTGGCCAAAAAACTCTG  
GAATACCAGAGTACATCCGAAAAAACTCCAGTACTATCAATGTGCTGATGTGAACTTCACCGATGTCAACG  
ACATCGTAGTCCCCCTTCCGTAAAGAAAGAGTTCAGGGACATGATACTCAGAAACAAAAGAGCCTTCTC  
AAATCGAGACGAAGCTCTCCCTTTTAATACTGCTGTTATCGCTACAATCCGAACAGTAGACAACGAGCCT  
GTGTATTCAAGATACCCGAGTCTCATGGGTGACTCTGACTTCATAAACAAAGACGTCAAACAGTTACTGG  
ACGATGGCATAATTAGGCCCTCCAGATCGCCTTACAACAGCCCAACATGGGTGGTTGATAAAAAAGGCAC  
TGACTCATACGGTAACCCAAAAAAAAGGTTGGTAATCGACTTCAGGAACTGAACGAAAAAACCATACC  
GGACCGCTACCCCATGCCGAGGATCCCATGATCTTAGCAAATCTAGGAAAGGCCAAAATACTTCACTACC  
CTCGACCTAAAGTCGGGGTACCATCAAATTTACCTTGCGGAGCATGACCGCGAAAAGACTTCATTTTCAGT  
AAGCAGCGGCAAGTACGAGTTCTGTGCGCTACCATTTCGGCCTGCGCAATGCAAGCAGCATATTCCAAAGG  
GCAATAGACGATATCCTGAGGGAACATATAGGAAAGATTTGCTTTGTCTATGTAGACGACGTCATAATTTT  
TTCTAAAAACGAAACGGAGCACCTTCAACACATTAACATTGTGTTAAAATGTCTAATCGACGCAAACATG  
CGTGTAGGCCCCGAAAAGACTCGTTTCTTCAAGGAAAGTATCGAATTCCTGGGTTTCATTGTAACCAAAG  
ACGGAGCAACATCCGACCCCAAAAAAGTTAAAGCCATTTCAGGAATTCCTGAACCAAAGAATGTCTACAG  
CGTTAGGTCCTTCTTGGGGTTAGCCAACTACTATAGGGTCTTTATTAAGGACTTTGCCGCTATAGCGCGTC  
CGATATCGGACATACTTAAAGGGGAAAATGGTTCAGTTAGTAGGCACGTATCAAAGAAAATCCCTGTTGA  
ATTTAATGAAGTTCAACGCGATGCATTTACCGTCTGCGGAGTATTTTGGCATCAGAAGACGTCATGTTAA  
TGTATCCAAACTTCCAGAAACCGTTTCGATTTAACCCTGATGCTTCGGCCAGTGGAAATTGGCGCGGTTCTT  
TCCCAAGGCAATAGGCCAATAACAATGATTTCTCGCGCCTTAAAACAGGCCGAACAAAACCTATGCCACTA  
ACGAAAGAGAATTGCTGGCCATTGTGTGGGCTTTAGGCAGATTGCAGAACTTTCTGTACGGTTCTAGGGA  
AATTAACATTTTTCACGGACCACCAGCCGCTCACGTTTCGCTGTGTGCGGACAAGAACACGAATTCCAAGATT  
AAAAGATGGAAATCTTACATTGACCAGCACAAATGCCAAAATGTTTTATAAACCGGGCAAAGAGAATCTGG  
TGGCGGATGCCCTTTCAAGGCAAAACATTAATGCTCTCGAAGATGGGCCCCGTTTCGGACGCTGCAACCGT  
TCACAGCGAACTCTCCCTGACCTACACGGTCGAGACAACAGACAAACCTTTGAATTGCTTTAGGAACCG  
ATTGTCTTAGAGGAATCGCGTTTTCCGCTAAAGCGAAACTTGTTGCTGTTTCGCAGCAAAACACGCCACTT  
GATCAGTTACACTGACAAGAGCTCAATTCTCAAACCCCTCAAGGAAGTTGTGAATTCTGGAGTCGTTAAT  
GCAATACATTGCGATCTTCCCACGTTGGCAAGTTTCCAACACGACCTGATTTTGTATTTCCCTGCTACCCA  
ATTCTGGCATTGCAAAAATCTTGTGCAAGATATAACGGACAAAACGAGCAGTTAGAAATCATCACTGCC  
GAGCACAATCGAGCGCACAGAGCAGCTCAGGAAAACATTAAACAAGTACTTCGGGACTATTATTTTCCCA  
ATATGGCCAGTCTGGCCAAAGAAGTGGTTGCAAACTCGAGGGTCTGCACTAAAGCCAAATACGATAGGCA  
CCCGAAGAAACAAGAACTCGGGGAAACGCCTATACCAAGTTATACTGGCGAAATGTTGCATATTGACATT  
TTCTCGACAGACAAGAAACAGTTCTTGACCTCGATAGACAAATTCTCAAATTTGCAGTCGTCCAACCGAT  
ATTATCCAGAACGATAATCGATGTCACAAGCCCTCTACTGCAAATTGTTAACCTTTTTCCCGCAACCAAGA  
CAATTTATTGCGATAACGAGGGCGGCCTTCAATTCCGAGACCATCACTTCGATGCTCCGAAACGTCTACGGC  
ATTTGCATTGTGAATGCGGCTCCGCTTCACAGCACCTCAAACGGCCAGGTGGAGCGCTTTCATAGCACCTT  
GACCGAAATTGCGAGATGCCTCAAGTTAGACAAGAAAATCAGCGACACTACAGAATTAATCTTAAAGGCT  
ACGATAGAGTACAACAAAGTTTTGCACTCAGTAACCCTCGAGAAACCAATTGAGGTCGTTTCATGCAGCAG  
CTTCTGATCGTCGCGGGAACGTCAAAAACAGGCTAATTAAGGCACAGCAAGACAATATCAAAGGTGCA  
ATGCATCCAGACAAAACCGCGTTTTTCGAGGTAGGAGAAAAGGTGTTCCAGAAGAACAAACAAGAGGCTAG  
GGAACAAGTTAACTCCCTTATGCTCAGAACAAAAGGTCGAAGCAGACCTGGGAACGTCTGTCCTCATTAA  
GGGGAGGGTGGTCCATAAGGACAACCTGAAATAAGTTTTCTCCACAATTAGCTAGTAAGCCAACCTCAGA  
GTTTAAACACCGTTTTATATGGTTTCGTCCATTTCAAATTTGCACTCACTTTGCTTGTGGCACTAGCAGCGGT  
AAATGCCTCGGATCACCGACTTCTCGCATGCCAACTACATTCCGGTCTTTGACGGGGAAGTACTGGTGTTT  
GATCAACGTAGCTACTTGAGGCACTCAAGTAACATTTCCGAATTTGTTAGTATGATAGACGAGACGGAAA  
GACTGTCCGATTCTTTCCACAGTCGCATATGCGCAAACCTACTAGACGTAGATACAGATCACCTTAGAACA  
TTGTTGTCCGTTCTTCAAGTGCATCACAGATTTGCACGAAGCCTCGATTTCTTAGGCACTGCCTTGAAGGTT  
GTTGCTGGCACCCCTGATCCTTCAGATTTCTTAAGGATCCGCGTTACAGAGACGCAGTTGGTGGAGGCTAA  
CTCCAAACAGATACTAATAAACTCCGAACTCAAAAACAAATAAACAGACTAACGGACACTATCAATAA  
AATTATCAGTTCCCGCAAAGGCGATTTGGTTGACACTCCTCATTTATTCGAGACCCTGTTGGCAAGAAATA  
GAATACTGAACTCAGAAATTCAAAATTTAGTACTACCATAACGTTGGCAAAAGCAAGCATAGTAAATCC  
TACAATCCTTGATCATACCGATCTAAAATCACTTATCGAACAAGATACCCCAATAGTTAGCTTGATAGAAG

CTTCTAAGATCAAGGTCCTTCAGTCCGAGAATATTATCCACATATTAATAGCCTACCCTAAAGTTGAGTTT  
AGGTGCCAAAAGGTCTCCGTCTATTTTGTTCACACCAACAAACCATTCTGCGACTCGACGAAGACACGTT  
GGCGGAATGCGAAAAGGATACCTTTGCAGTTACTGGATGCACCGTAACTACGCATAACACCTTCTGCGAA  
CGAGCACGGCGCGAAACCTGTGCTGACTCCCTTCACGCGGGAAACATCGCCAACTGCCACACTCAACCTA  
GCCACCTGAAAGCGATAATGCCTGTAGATGACGGCGTCGTGGTTATCAACGAAGCGACAGCGCACGTCCG  
AACAGATGATGACGCAGAGGTAACCGTCTCAGGAACCTTCCTGATAACTTTTGAACGGTCTGCAACTATC  
AATGGCACAGAATTTGTAAACCTGCGCAAATCACTAAGCAAGCAGCCTGGCATCGTGAGGTCACCGCTCC  
TAAACATCATCGGACATGACCCGGCACTAAGCATACCACTCCTGCATCGTATGAACATCAACAACCTTGCT  
ATCAATTCGAGATTTTCAGGGAGGAGGTAGTTGCGGCTGGCTCGCCTAAATTCTGGTTCGCGATTGGCGCG  
GTCCTGAATGTCGGACTAATTGGCTCATTCTTCCTTTTTCTGGTGCTAAGGAAAAGACGAGCCTCCATGCA  
GATGCAGAAGGCGATTGACAAATACGACATGCCCCGAGGACGGCCATCATCTGAGGGGGGGGAGTAGTTAA  
CAACTAAGCATAAAATATATTGCCCTAGCAATTAAGTAGCTTCGTATTAACAATGCTGACGCGCCAGA  
GAGTTCAGCGTCTGCGCTAAGAACGGCCAGCAGCGGTAAGCTGACACTGCATGGAATGCTGAGTCCGGCTT  
GCCGACCATGCTTTGATGGCGTGATGCATTGAGGCTTAGGGTATTTGTATAATTTGCTTGTCCCCTAGTTTT  
TAGTTTTATATGAAGCGCGCAACACATAAGTCGCCGAAATAAATACTGCTCCGGCATTGCCGATAAAA  
CATATCTTTTCGTAATATTACTGGATCAAGGAGAACATATTTTGATCAAGGGCAGCGCGGGATCAACGCAA  
CTTACCCAAGATAACATTGTGTTACATCGCAGAACATACATTAATGAATAACT

>9\_rnd-1\_family-348\_\_LTR\_\_Gypsy

TGTAGTGCGTATATGCCCTTACAGAATACCCCCGTACTTAAACATAAAGTATGCAGCACTTTGTTGCATAC  
AATAACAATAATATAGTAAACGAGCCCAGAGCCACGTTATGTATTGGCTCGGTCTCATATTACGCAGCGC  
GGTTCACTAGCCTCACTAGCTGACCGTTTATGCTTATGATGCATATCCCACGCTCCGTCTGAGCGCATTCC  
GTGAGCAATATATATGCTCACTAATACAGGCATATGCGAGCTACTCACTCTCCCTCTCTTTGTAGCTGTTA  
ACGAATAACAGCATAAGTATATATGTATATCCATAGGCTAAGCGAACATTATAACAAGTGAATAAATTCA  
TTCTGAACAAAGATACAAAACAGCACTGACGTGCTGACTTATTTTTTCATTGACAATAAGTGCTCATTTTAC  
ATGGCGACCGTGACTTGGTCACGCATCCCTGCCTGGAGGAAGTAGACCAAGTGAAAAGGAACTTCATGGC  
CAACAAAGAGGCCATGTATAATATACAATTTGAAAAAGGAACTTCATGATCAACGAGAGGCATCCCGTAT  
TCCGAGTGAGTAGAGAGTGAGTGTTATGGTTCATAAACGCGGTGGCTTAAAAAATAAAATTAATAAAAGA  
ATAGCGCACCTAAGGTGGCTGCTATACACAAAACAGCCAACACCCGCATGGTCGACAGCTCAGGAAGTTA  
CAAAATGAGCTCGACTATCTGCAAAATGAAATTAAGCAGAGAAAAACCAAACACCACTACTCACTCAAAT  
ATAAAAGTTCTAATAAACCAAACAATAAAAGTTACACCCATTGACGCAAACCAGCCTACCAAAGAA  
AAAACGAATGTGCCACAGGATTGCGAAGGCCCACTCGACAGCCCCTTCTGCGAATATACGTGCAGACAC  
TGCACAGCCAGCACCTCCGGACAGCCCACTGCAGACCGACGAATAAACACCTGTGCGAAGACCGGCA  
CCGGTNCCGCCTGAGCCCATAGGCCCAGGACAACAGCAGCTGTGAAATCGGAACAAGCGCGAGAGGCAC  
NCCGCCACTTGCGCCTACGAGGGAGCGTCAGCGTAGCCACATCCGGCGACGNCCAGCTGACGCAACGAC  
GAACAACAGNCGCAGCTATATCCTTAACTACTTTTTTAATTAAATATAAAAAAATTTTTGTAAAATTGAGCG  
GAAACACTTCCGCCCCGATTAGCAGCATAGCCCGTAAAGCTATGCGAAATGCTAGGTAGTATTTTGTGTTAT  
AAGAAATATTGAAACCTTGATTCTAAAAACCCAAGTCAACCAGCACTAACGTGCTTTTGTGAAATCATTAT  
TAAATCCAAACATTACCAACATATTAATTAATAGTAATAAATAAAACTTAAAAATTGTAATGCCCGAC  
GACAATTGAGTCGACCGGCAAGACGTTTGGCCAGTACAGCCATTTCGAAACAATAGGTAGGAAAAATACA  
GATTGTAAAAAATTTTTTAGATGCGTTTTTAAGCAGAAAAACAAACAAGCAAAACAAAACCCGACTTGTA  
AAACAATAAAAGCATCAAATTCATAAATATAGTAATAAAACCTCAAATGAACGATACAAACAACA  
TGTCTTGTAAGTAAACAAAAACAAATTTAACATTACGCATTTGTAAATTTTTTTTAAAGATAATTCCTAA  
AACCTCAAATGAACGATACAAACAACAATATATGAATATTAATATCAAAAAGAGGAAATTAATAAAGTT  
ATAATTCGTTCAGTTTGTACATTAGGTAATTCAAATATGATCAAGAATTAGCATGATTAAGGACAAGA  
TTAACAAGGTATATAACGACTATACAGACTTTCGTATGCGAGCCATACAAATTTTGCAAAGGCATAGAGA  
ATTCATACCAGTATATGAGTTCGAATACGAATATATAGAAACATTCGGCACGGTGACAAGTCCACTCTATT  
CATGTTCTAAAATAGAGAGCGGAATAATCTTGTCACACTACCCTACGTCAAAATAAAAAACAATTATTGA  
CGAGCATCCGATTCTAGGGCAGACAACAATTGTTTTAGTACGTCTGCATAGGTAGTAGTCAAATCAAAAG  
CAAGAATATTTATATAGGAATATGGGGGGGAAAAGAATCAAAGGCAGATGATAAACTGCCAATGTAGTT  
AACGTAGTAGAAGTCGTAGACACCACTCCCCATGTGCAGTTAACAAACATACTGCTAATAATACTCATTG  
TAATAGCTTCAGTAGACATCCTTCTGAAGATTTATCTTCTTCATAAAAANTCACTGAGGAAGCGTTACATG  
AGTCGAGCCAACGACTTAGACAAGGTCTAAGCCACTGCTTAAATAAAATATTTAAGTAGCGGAAGCTTAC  
ATGGACTGGTCCCAAATAGTAGAAAAGATAAAGCGGCATAGGGAAAATTTGATAAATCATACAAGTGC  
CTTAATAAAAGCGCACCAAGTTTTAAGACCCACCATAATTAACATACTGAGATCCTTGTATATGAGTACA

ATGAAATCAGGAGTCTAGTTACCGAGTGTCAAAATAAACTGACAAGTTTACACAGAGTCCAAACTTCAGA  
CGTTTTACAGCGTCTAAGGGATAATCTGGTAAACTTAAATAAAAAGTATGATCTCCAGCTTTATCTTCCAT  
CGGTGTTAAATACACCGGTAACATTTGATAAGTCACTACTGACAAACGACCAAATAGAAGATACAAAATT  
AGTAAACATGGCACAAACAGTTGTAGAATTTATCAAGCTAGCCACATCTCTGATACCAGAGTTTGACGGT  
AAGCCGGAATACTACAAAGTTTTCTAGATTCTTTGAATCTATTAGAAACCTTAAAAGGCACACATGAGC  
TAACGGCCATAAGCCTTATAAAAACAAAGCTAAAAGGCCATGCGAGAAATTTGATAAGTAATGAGCAGA  
CAATTGCTGCAATCATTACGCAACTATCAAATGCAGTAAAAGGAGAATCGGTAGAAGTTGTATCTGCTAA  
GCTTCTTAATTTGCAACAGAAAAATAAAACGGCTAACCAATACACCCAAGAGGTGGAAAAACTGACAAA  
GGCCCTTGAAGGCGCCTATATCAGTGAAGGTCTAAGCCAATCACTTGCAAACAAATACAGCACTACAACA  
GCTGTAAAAGCTATGACCCAAAATTGTTTCGATTGATAAGGTAAAACCTTATCATGCAGGCAGGCACATTCA  
CAAATATGAATGATGCCGTATCCAAATTTGTCAATAGCTGCACGGAGATAACAGGTCAAAGTAACACTGT  
CCTGTATTATCAACGAGGTGCAACAATAATAATAGAGGAGGCCGAGGTTATAATCGTGGCAGAAATTAC  
AACCACAACAATTATAACCGAGGCGGTAACAACAATAACAATAATTACAATAACCGTGGAGGAAGACGA  
GGCCAAAATAGAGGAAGAGGGCCGAGGTAACCTCAACCAAGGTTATAATAGTAACAATGTGAGAATGGCG  
CAAATACGCCGGAATACTCTCAGAACCCTTTAGGAAACAACCAGTAAATGTAAAGGTTTATTCCATCAA  
TTACAGTCTTAATATATTTGTCACTTTTTATAATCATTCAACTGAAAATAAACTCACATTCCTAATAGATAC  
TGGTGCAGATATCTCACTTTTTAAAAATAAATTCAGACAATTTCAAATTTCAAGAAGAAAAAATTATAAAC  
ATCCAAGGCATAGGCCAAGGTGTAATAAAATCTCAAGGAACAACGTCAATAGAACTTCAATACACAAAA  
TATATTATTCCACACGAATTTCAATTTAGTAGATTCTGATTTTTCAATACCGTGTGATGGAATAATAGGCATT  
GATTTTATTAAAAAATTCAATTGTCAATTAGATTTCAAACCAAGTGAAGACTGGTTTATAATTAGACCTCA  
AAATTTAAATTATCCAATTCATGTTCCGATAACATATAGTGCTGGCAACAACACAGTTCTCTTGCCAGCCA  
GATCCCAAGTAATTCGAAAAATAGACATTAATACAGTAAATGATTATATATTTGTTCTTAATCAAGAAAT  
ACATAATGGAATTTATGTTGCAATACAATAGCAGCATCCAAACATGTATACATTTCGCTTCTAAACACA  
ACTAATTTTCGACCAATTGGTCAAAGTAAACAAAATCCAATATGAAAATTTAAAAGATTACGACATTCATA  
GCACTACTCCAGAAAATAGAAGCGAACAAGTACTTTCAAATTAAGAAAAAATTTTCCAGAACAATTCAA  
AAGTCAACTAACAGAATTATGCACCAAGTATAGTGATGTGTTCCGACTGGAAACCGAACCAATAGCGACA  
AATAATTTCTATAAACAAACATTAAGACTTAAAGATGATGAACCCATTTATATTAAAAACTACAGAAGCC  
CGCATAGCCACGTTAAAGAAATTCAAAACCAAGTAGGGAAATTAATAAACGACAAAATCGTAGAACCGT  
CTGTATCCGAGTATAACAGCCCACTCTTGTTAGTTCCGAAAAATCATTACCAAATTCGGAAGAAAAGAAA  
TGGCGATTAGTAATTGACTATCGCCAAATCAACAAAAACTACTTTCTGATAAATTCCTCGCTCCCAGAAAT  
GATGATATTCTAGACCAACTGGGCAGAGCTAAATACTTTTCATGCCTTGACTTAATGTCAGGTTTCCACCA  
AATTGAACTTGAAGAAAATTCAAGAAATATAACATCTTTTTTCAACGAGCAATGGCTCATATCGCTTCACGC  
GATTACCATTTGGTCTTAAATAGCACCAAAATTCATTTTCAGAGAATGATGACTATAGCATTCTCGGGTTTA  
GAACCCTCCCAGGCATTCCCTTTATATGGATGACTTAATGGTGATAGGATGTTCCGAAAAACACATGATTAA  
AACTTAACTGATGTTTTTAATGTATGTAGGAAATATAACCTGAAGTTGCATCCAGAAAAATGTTTCAATTT  
TCATGCATGAAGTGACATTTTTAGGTCACAAATGCACTGACAAAGGAGTATTGCCAGATGACAAGAAGTT  
TGACGTCATCAAAAATTATCCTGTCCCTCATGATGCGGACAGCGCGAGACGATTTGTAGCATTCTGCAATT  
ATTATCGTCGTTTTATAAAAAACTTCGCCGATTATTCACGGCACATAACTAGATTATGTAAAAAGAATGTT  
CCTTTTGAATGGTCAAGTGAATGCCAAAACGCATTCCAGTACCTTAAAGAAAAGCTTATGCACCCACATT  
ATTACAATATCCTGATTTTCGCAAAGAATTTTGCATTATAACAGATGCCAGTAAACAAGCTTGCGGAGCA  
GTTCTAACTCAGAACCGTGACGGAATTCAGCTCCCAATAGCTTATGCATCTCGTTTCAATTTACAAAGGGGAA  
AGCAATAAGAGCACAAACAGAACAAGAGTTAGCGGCAATTCATTGGGCAATTACCCATTTTAGACCATATA  
TTTATGGCAAACATTTTACTATTAAAACGGATCACAGACCATTGACATATCTTTTTTCTATGACTAATCCCA  
GTTCTAAATTAACCTCGCATGCGGCTAGAGCTTGAAGAATACGACTTCACAGTAGAATACCTAAAGGGGAA  
AGATAATTTTCGTAGCAGACGCACTTTCGCGTATTAATATAAAGGAACTCAAAGATATGCAACATAAAGTC  
CTGAAAGTCACTACCAGGCGACAAAGTAGACAAAATAAAAACTGTACAGTAGAAAATTATGAACTTCTGC  
CAAGGCAAAGTCATAAAAAATGTATCCAAGCCCAACGTACATGAAGTCATTACAAATGATGAAGTACGAA  
AAGTAGTGACCTTGCGCATAACAGAATCTAAATGTTTATTTAAACATGGAAATAAAATTATCGCAAGAAT  
TGAAGTTAGCGATTTATATACCAATGGAATTCTCGACCTAGGTCAGTTCTTCCAAAGGCTCGAAAAAGAG  
GCCGGTATATTAAAAAATCAGCCAACTCAAGGTGGCACCGAGCGAAAAGATCTTTGAATCAGTTTCAATAG  
ATTCTTTTAAAAATATGGGCAATAAAATATTAATAATCTTTAAGAGTAGCGCTACTCCAGCCGGTGACCCA  
AATAAAAGATGAAAAGGAGATACAACAAATATTGTCTACATACCATGACGACCCAATTCAAGGAGGTCA  
TAGCGGCATAACAAGAACGTTAGCGAAAAATAAAAAGACACTACTACTGGAAAAATATGACACGTCATAT  
AAAAAGAGTACGTACGTAGATGTCAAAAATGCCAAATGTCTAAAAAAAAGACGCACACAAAAAATCCTC

TGACTCGCACAGAAACACCCCGTGAATGCTTTTCGATATAGTGATAGTGGATACAGTTGGTCCGCTACCCAA  
ATCGGAAAAATGGTAATGAATACATAGTCACATTAATATGCGACCTTACAAAAATATTTAGTAGCCATTC  
CAATAAAAAGCAAAAAGCGCAAATAATGTGCGAAAAGCTATATTTCGAAAAATTTTCATACTCAAGTTTGGT  
CCAATGAAGACGTTTCATCTCGGACATGGGAACAGAGTATAAAAACCAGATTTTAACTGACTTATGCAAG  
TATTTGAAGATCAAGAATCTCACCTCTACTGCATATCATCATCAAACATTAGGGACAATAGAACGAAGTC  
ATCGAACTTTTAATGAATACATTCGTTTCATACATCTCTGCAGACAAATCTGATTGGGATGTCTGGGTTC  
TATTTCACTTATTGCTTCAACACGACACCATCAGCAACGCATGAGTATTGTCCATACGAACTAGTATTTGG  
CAGACTACCGAAACAGTTCATAGATTTAAACAAAACCTAATTACATAGATCCTATTTATAATTTAGATGACT  
ATTCTAAGGAAATAAAGCTTTAGATTAGAAATAGCATACAAAAGAGCTAGAATTATGTTAGAAAAAGCT  
AAGGCTTATAGGAAATTAGCATATGACGAAAAAANAAAAAACTTTGAATTAAGTAGGAGATAAAGTA  
CTTATAAGAAACGAAACAGGGCACAAATTAGACCCAGTATATTTAGGACCATATATAGTAGAGAAAAATA  
GAAAATAATGACAACATTTTTTTTTAAAGATAGTAAAGATAAAAA

>160\_rnd-1\_family-108\_\_LTR\_\_Gypsy  
ATATAAGTTAACAACCTAAGCATAAATATATTGCCCTAGCAACTAAGTAGCTTCGTATTAACAATGCTGAC  
GCGCCAGAACTGAGTTCAGCGCTCTGCGCTAAGAACGGCCAGCAGCGGTAAGCTGACACTGCATGGAATG  
CTGAGTCGGCTTGCCGACCATGCTTTGATGGCGTGATGCATTGAGGCTTAGGGTATTTGTATAATTTGCTT  
GTCCCTAGTTTTTATAGTTTTATATGAGGCGCGCAACACATAAGTCGCCGAAATAAATATACTGCTCCGGCA  
TTGCCGATAAAACATATCTTTTCGTAATATTGTCTGAGNCCAAGGCCAGCAATGGCCCCAGAACATATCTTC  
GCGGATCAAGGGCAGCGCGGGATCAACGCAACTTACCCAAGATAACATTGTGTTACATCGCAGAACATAC  
ATTAATTGATAACTGGCGCCCAACCAATAAATAGGAACCCATACCATGTAAGTTCATAAGTGATTTTCAGTT  
TGAAGAAATTATTCACGAACGCCACGTACCGATACGTGTGATTTTAAAAAAAAAAAAAAAAAAAAAAAAAA  
AAAAAAAAAAATTGTAAAGTAAAGTAAATATTGCTGCTCTCTTCTGCCAGCATTTTCATTCCTTTAAATCAT  
TGCATACTTTCACTAAAAACTGTTGCATACTTTTACCAGCGTTCTTGTCAATAAAGCATTGCATACCTTAA  
ACGAATAATTATTGCATACTTTTCGGCAGCATTATATTTTTTGTCTGCATACCCCTAACAATTTTTTTATAATA  
ATATTGCATACCCCAAGATTCACCAGTTTCCACTATTGCCAACAGCGTTACCTGCCGATCTTTCTCGATCG  
GCCTAAGTTTGAAAAGTGCCAACCATAAGCCAATGAGTTGGAATTATAGGGAGATAAAAGTCGAATATAA  
TAGTGACGATAGCTGGGAGGGGGAAATCAATTGCTCAGTAGATCCTACTCCTGCAGATACCGTTGTAAC  
GAAGAAATGGAGCCGGCTCAAGTTCAGAATCTCATTGAGGGTGCCATCAGGCAAGCTTTAGCGCAACAAC  
AAAATCAGTTTCAAGCACAAATAACCGCTTTAGCTTCACAAGTACAGAGTTTGCAGGTGGAGGGCGCCGCA  
AATCGTCACATACGAGAAAATATCCGTCGATCCTAACGCCAAATGCGATATTCCTTGACATTATTAAT  
CTGTGCCGATTTCTCCGGCGTACAGGATGAGTATGTAGCGTGGAGGCAAGCAGCCATCTACGCGTACGA  
ACTATTCAAGAACTATCCAAAGAGCACTGCACACTACCAAGCGGTAGCGATCATTAGGAACAAAATCAAA  
GGCCAGCTGGAGCCTTACTAGTGTCTCACAACACTGTCCTAAATTTTCGATGCAATACTAGCTAGGCTAGA  
TTGCACATACTCGGACAAAACATCCTTGCGCTTGCTGAGACAATGTTTGGAGTTAGTTACGCAGGGCGAA  
ATGTCCCTGATGCAATACTACGATGACGTCGAAAAGAACTCACGCTCGTAACTAACAAAATTGTAATGT  
CTCACGACCAAGAAGGCGCGGATTTGCTCAACCGGGAGGTCAGAGACGACGCCTTGACGCCTTTATCTC  
CGGTCTTAGGAAGCCGTTGAGAGCGGTTGTGTTCCCTGCACAACCAAAAGATCTACCATCCGCTCTGGCCC  
TTGCCAGAGAGGCAGAAGCTAGCATTGAGAGAAGCATGTTTCGCGAACTCTTACGCTAAAGCCTTGCAAGA  
CCGAGCGCAAATTGCTGAAAGTAACAAAAACCGTGCCCAAGGCAAACAAACCAGATTTAACAAGATGA  
GCAAAATCAGGAGAGAAATCCCCATTTTGTGAAACGCCAAAAGGGCGGTCCCCAGCCCCAGGCCCTAA  
AGATAATCAAACCTGAGGCTCCACAGCCCATGGAAGTTGACTCTTCCCTCCAGATTTAGACAAAAAACCGAC  
TACAGCAAGCGTCAGGCTAATGAGTCCAACGCACCAAAACGCAAGAATTCGTCAGACCGTTCAACAGGTC  
AAAGACGACAACGCGTTAACAATGTCGTACAATCAGATTCCAAAGAAGCCGTAACAGAATTCGAGAAGG  
CGGCCAAAGAGGCAGTTGAAGAACTAGAGAGTGAGAACGAGTACGCACCTGGTGACGACTCGATTAATT  
TTTTAGGGAACTCCCGGCTTCCGTACATTGAACGACGGTTGGCTGGGAGAACTCTGAAGATGTTGATTG  
ACACTGGCGCGGCAAAAAATTATGTGAAGCCCTTAACAGAGCTAAAGACCATAACGCCGGTCGCCAAGTC  
ATTCTCGGTAAACTCGATCCACGGGTCTACCGAAATCAAGCGCAAATGCTTGATGAATATTTTCCAACATA  
CCTCCCCGTTTTTTCTCCTCGATACCCTAAGTTCTTTTCGACGCCATCATAGGCTTCGACTTGCTAACACAAG  
CCGGAGTCAAATTGAACTTGGAACAAAAACACTCTGGAATACCAGAGTACATCCGAAAAACTCCAGTACTA  
TCAATGTGCTGATGTGAACTTCACCGATGTCAACGACATCGTAGTCCCCCCTTCCGTAAAGAAAGAGTTCA  
GGGACATGATACTCAGAAACAAAAGAGCCTTCTCAAATGCAGACGAAGCTCTCCCTTTTAATACTGCTGT  
TATCGCTACAATCCGAACAGTAGACAACGAGCCTGTGTATTCAAGATACCCGAGTCTCATGGGTGTTTCTG  
ACTTCATAAACAAAGAAGTCAAACAATTACTGGACGATGGCATAATCAGGCCCTCCAGATCGCCTTACAA  
CAGCCCAACATGGGTGGTTGATAAAAAAGGCACTGACTCATACGGTAACCCAAAAAAAAGGTTGGTAAT

CGACTTCAGGAACTGAACGAAAAAACCATACCGGACCGCTACCCCATGCCGAGCATCCCCATGATCTTA  
GCAAATCTAGGAAAGGCGAAATACTTCACTACCCTCGACCTAAAGTCGGGGTACCATCAAATTTACCTTG  
CGGAGCATGACCGCGAAAAGACTTCATTTTCAGTAAGCAGCGGCAAGTACGAGTTCTGTCGCCTACCATT  
CGGCCTGCGCAATGCAAGCAGCATATTCCAAAGGGCAATAGACGATATCCTGAGGGAACATATAGGAAA  
GATTTGCTTTGTCTATGTAGACGACGTCATAATTTTTTCTAAAAACGAAACGGAGCACCTTCAACACATTA  
ACATTGTGTTAAAATGTCTAATCGACGCAAACATGCGTGTAGGCCCCGAAAAGACTCGTTTCTTCAAGGA  
AAGTATCGAATTCCTGGGTTTCATTGTAACCAAAGACGGAGCAACATCCGACCCCAAAAAAGTTAAAGCC  
ATTCAGGAATTCCTGAACCAAAGAATGTCTACAGCGTTAGGTCCTTCTTGGGGTTAGCCAACTACTATAG  
GGTCTTTATTAAGGACTTTGCCGCTATAGCGCGTCCGATATCGGACATACTTAAAGGGGAAAATGGTTCA  
GTTAGTAGGCACGTATCAAAGAAAATCCCTGTTGAATTTAATGAAGTTCAACGCGATGCATTTACCGTCT  
GCGGAGTATTTTGGCATCAGAAGACGTCATGTTAATGTATCCAGACTTCCAGAAACCGTTCGATTTAACCA  
CTGATGCTTCGGCCAGTGGAATTGGCGCGGTTCTTTCCCAAGGCAATAGGCCAATAACAATGATTTCTCGC  
GCCTTAAACAGGCCGAACAAAACCTATGCCACTAACGAAAGAGAATTGCTGGCCATTGTGTGGGCTTTAG  
GCAGATTGCAGAACTTTCTGTACGGTTCTAGGGAAATTAACATTTTCACGGACCACCAGCCGCTCACGTTT  
GCTGTGTGCGACAAGAACACGAATTCCAAGATTAAAAGATGGAAATCTTACATTGACCAGCACAATGCCA  
AAATGTTTTATAAACCGGGCAAAGAGAATCTGGTGGCGGATGCCCTTTCAAGGCAAACATTAATGCTCT  
GCAAGATGGGCCCCGTTCCGACGCTGCAACCGTTCACAGCGAACTTTCCCTGACCTACACGGTCGAGACA  
ACAGACAAACCTTTGAATTGCTTTAGGAACCAGATTGTCCTAGAGGAATCGCGTTTTCCGCTAAAGCGAA  
ACTTGTGCTGTTTTGCGAGCAAAACACGCCACTTGATCAGTTACACTGACAAGAGCACAATTCTCAAAACC  
CTCAAAGAAGTTGTGAATTCTGGAGTCGTTAATGCAATACATTGCGATCTTCCACGTTGGCAAGTTTCCA  
ACACGACCTGATTTTGTATTTCCCTGCNACCCAATTCTGGCATTGCAAAAATCTTGTGCAAGATATAACGG  
ACAAAAACGAGCAGTTAGAAATCATCACTGCCGAGCACAATCGAGCGCACAGAGCAGCTCAGGAAAACA  
TTAAACAAGTACTTCGGGACTATTATTTTCCCAATATGGCCAGTCTGGCCAAAGAAGTGGTTGCAAACCTGC  
AGGGTCTGCACTAAAGCCAAATACGATAGGCACCCGAAGAAACAAGAACTCGGGGAAACGCCTATACCA  
AGTTATACTGGCGAAATGTTGCATATTGACATTTTCTCGACAGACAAGAAACAGTTCTTGACCTGCATAGA  
CAAATTCTCAAAATTTGCAGTCGTCCAACCGATATTATCCAGAACGATAATCGATGCTCCGAAACGCCTAC  
GGCATTGTGATTGTGAATGCGGCTCCGCTTCACAGCACCTCAAACGGCCAGGTGGAGCGCTTTCATAGCA  
CCCTGACCGAAATTGCGAGATGCCTCAAGTTAGACAAGAAAATCAGCGACACTACAGAATTAATCTTAAA  
GGCTACGATAGAGTACAACAAAAGTTTGCACCTCAGTAACCCTCGAGAAACCAATTGAGGTCGTTTCATGCA  
GCAGCTTCTGATCGTCGCGGGAACGTCAAAAACAGGCTAATTAAGGCACAGCAAGACAATATCAAAAGG  
TGCAATGCATCCAGGCAAAACCGCGTTTTTCGAGGTAGGAGAAAAGGTGTTCCAGAAGAACAACAAGAGG  
CTAGGGAACAAGTTAACTCCCTTATGCTCAGAACAAAAGGTGCAAGCAGACCTGGGAACGTCTGTCTCA  
TTAAGGGGAGGGTGGTCCATAAGGACAACCTGAAATAAGTTTTCTCCACAATTAGCTAGTAAGCCAACT  
CAGAGTTTAAACACCGTCTTATATTGTTCTGTCATTTCAGGTTTGCACCTACTTTGCTTGTGGCACTAGCAG  
CGGTAAATGCTCGGATCACCGACTTCTCGCATGCCAACTACATTCCGGTCTTAGACGGGGAAGTACTGGT  
GTTTCGATCAACGTAGCTACTTGAGGCACTCAAGTAACATTTCCGAATTTGTTAGTATGATAGACGAGACG  
GAAAGACTGTCCGATTCCTTTCCACAGTCGCATATGCGCAAACTACTAGACGTAGATACAGATCACCTTA  
GAACATTGTTGTCCGTTCTTCAAGTGCATCACAGATTTGCACGAAGCCTCGATTTCTTAGGCACTGCCTTG  
AAGGTTGTTGCTGGCACCCCTGATGCTTCAGATTTCTTAAGGATCCGCGTTACAGAGACGCAGTTGGTGGA  
GGCTAACTCCAAACAGATACTAATAAACTCCGAAACTCAAAAACAATAAACAGACTAACGGACACTAT  
CAATAAAATTATCAGTTCCCGCAAAGGCGATTTGGTTGACACTCCTCATTTATTCGAGACCCTGTTGGCAA  
GAAATAGAATACTGAACACAGAAATTCAAAATTTAGTACTACCATAACGTTGGCAAAAGCAAGCATAGT  
AAATCCTACAATCCTTGATCATACCGATCTAAAATCACTTATCGAACAAGATACCCCAATAGTTAGCTTGA  
TAGAAGCTTCTAAGATCAAGGTCTTCAGTCCGAGAATATTATCCACATATTAATAGCCTACCCTAAAGTT  
GAGTTTAGGTGCCAAAAGGTCTCCGTCTACCCCGTTTCACACCAACAAACCATTCTGCGACTCGACGAAG  
ACACGTTGGCGGAATGCGAAAAGGATACCTTTGCAGTTACTGGATGCACCGTAACTACGCATAACACCTT  
CTGCGAACGAGCACGGCGCGAAACCTGTGCTAGCTCCCTTCACGCGGGAAACATCGCCAACTGCCACACT  
CAACCTAGCCACCTGAAAGCGATAATGCCTGTAGATGACGGCGTCGTGGTTATCAACGAAGCGACAGCGC  
GCGTCCGAACAGATGATGACGCAGAGGTAACCGTCTCAGGAACCTTCCTGATAACTTTCGAACGGTCTGC  
AACTATCAATGGCACAGAATTTGTAAACCTGCGCAAATCACTAAGCAAGCAGCCTGGCATCGTGAGGTCA  
CCGCTCCTAAACATCATCGGACATGACCCGGCACTAAGCATACCACTCCTGCATCGTATGAACATCAACA  
ACTTGCTATCAATTTCGAGATTTCAAGGAGGAGGTAGTTGCGGCTGGCTCGCCTAAATTCTGGTTTCGCGATT  
GGCGCGGTCTCTGAATGTGCGACTAATTGGCTCATTCTTCTTTTTCTGGTGCTAAGGAAAAGACGAGCCTC  
CATGCAGATGCAGAAGGCGATTGACAAATACGACATGCCCCGAGGACGGCCATCATCCTGAGGGGGGGGT

AGTTAACAACTAAGCATAAATATATTGCCCTAGCAATTAAGTAGCTTCGTATTAACAATGCTGACGCGCC  
AGAAGTCTGAGTTCAGCGCTCTGCGCTAAGAACGGCCAGCAGCGGTAAGCTGACACTGCATGGAATGCTGAG  
TCGGCTTGCCGACCATGCTTTGATGGCGTGATGCATTGAGGCTTAGGGTATTTGTATAATTTGCTTGTCCCC  
TAGTTTTTCAGTTTTATATGAAGCGCGCAACACATAAGTCGCCGAAATAAATATACTGCTCCGGCATTGCCG  
ATAAAACATATCTTTTCGTAATATTACTGGATCAAGGAGAACATATTTTGATCAAGGGCAGCGCGGGATCA  
ACGCAACTTACCCAAGATAACATTGTGTTACATCGCAGAACATACATTAATGAATAACTTATA  
>160\_rnd-1\_family-23\_\_RC\_\_Helitron  
GATCGGACCACTATATCATATAGCTGCCATGGGAACGATCGGTCGAAAATTAAGTTTTTGTATGAAAAAA  
CATTTTGTTTTTCAAGATATCTTGACCAAACCTCGGCATTTATTAGTTTTACTTTACTCCTCATATATGTGCA  
AAATCCTATAAAGATCGGACCACTATATCATATAGCTGCCGTAGGAACGATCGGTCGAAAATTAAGTTTT  
TGTATGAAAAAACATTTTGTTTTTCAAGATATCTTGACCAAACCTCGGCATTTATTAGTTTTACTTTACTATT  
CATATATATGCAAAATCCTATTAAGATCGGACCACTATATCATATAGCTGCCGTGGGATCGATCGGTCGA  
AAATTAAGTTTTTGTATGAAAAAACATTTTGTATTATCAAGATATCTTGACCAAACCTAGGCATTTATTAGTTT  
TACTTTACTCCTCATATATGTGCAAAATCCTATAAAGATCGGACCACTATATCATATTGCTGCCATAGGAA  
CGATCGGTCGAAAATTAAGTTTTTGTATGAAAAAACATTTTGTTTTTCAAGATATCTTGACCAAACCTCGGC  
ATTTATTAGTTTTACTNNGCTCCTCATATATATGCAAAATCCTATTAAGATCGGACCACTATATCATATAG  
CTGCCATAGGATCGATCGGTCGAAAATTAAGTTTTTGTATGAAAAAACATTTTGTTTTTCAAGATATCTTG  
ACCAAACCTCGGCATTTATTAGTTTTACTTTACTCCTCATATATGTGCAAAATCCTATAAAGATCGGACCAC  
TATATCATATAGCTGTCATAGGAACGATCGGTCGAAAATTAAGTTGTATGAAAAAACATTTTGTATTATCAA  
GATATCTTGACCAAACCTCGGCATTTACTATTTTCCCGGTACTTCTTAGATAGAGGCCAAAGCACTATGAGCA  
TTATGAAAAGGTTGGGTCTGCAAGGGTATTAGATCTTTGGCGTGCCGAAGATAGCCCTTCTTTCTCGTTAG  
TTTTTAGTTTTTAAAAACTCAGTACAATTTCAAAAAATTTTAAACAATGTACTAACGACTAAGTTATGTCAAA  
ATTTAAAATTCCTTTATTTACCAGTTCGTTTGAAAAAATGTTTCATTCATTTTCAATAGCTTTTAGGTAAAA  
AACAAAGTAAGAATGCTATAGTTGGGAGTGACGCGCTAGGGGATACCATTCTACCAACAACAACGCCGC  
TATAGCTATAGAATAAAAGATACCTGATTTGCATGGACAGGCAGAGGCACATGGCTAGATCGACTAGGCT  
ATTGATGCTGATCAAGAATACATACTTTAAGTGGTTGAAGATCCTTTCTTCTGCCTGTTACATACGGCTGC  
ACAAATACATTATACCCCTTTTACCCATTTTAAATGGGTTTCAGGCTTTAAAAAGGCGAACACAATCAGTCA  
ATAAATAAAATCTTGCCGTGTTGCGTTTCTTGAGGCCATTTCAAACCTTGTTAGATTAAATATAAACAAT  
AAATAACAAATGTTATAAATATATATGTTTCATATGTATAAATATGCATATAAATTTTCATTTGAATTAATA  
GCATGGAATCCAAAAGTGACGCTATGTTAGGGGCTGCCAAGCTTATGTAGAANGCTAACCTATGGGAACAT  
AAAGATGCCACCTTGTGGAAGTACATTGACATTGTTAGTATATTTAGCCAAAAAATTGTTAAATTTAAAT  
AATTTTCTACTTACATGTCTTTAGCGTGCCCATTTGATTTTTATGTATTCTTGCCATTACACGACAGCATT  
GCCAGCTGATCGTGCGAGAAATTTCCCCCAGCTAACTGACCTAAGACAATATGTTAAATGTACAGAGTCTG  
TTATGTCATGTTATGTTTATATGTAGGTCAGTCGAGATTAAATGTTAAATGTATCTCTTGTTCATGTCCCTCT  
CCACCTTGCAAACCTGGTGAACGTTGCATAGTTTTAAGTGCTCCCAAAACCTGTTCTAAAATTTCTGTTTGCA  
ATTGAAATCATATGTAGAAATGAGCAACAATAAAATCTCTCTGTGGCGGTGCGAGGCGAGCGGGCGTGT  
TGCGGACAGCGCCCGGTGCGCCAATCAGACGAACAACCTAAAATTTGTGAAAGTACATAAGTAAAAGTAC  
ACATGACGATGAAACATGTTATTTACATATATGTTTATAAGTTAAACATGTTATTTATATAAAATAAATAC  
TTTAAATAGTTGTTAAAACATTCTACAATTTGTATTATTATCTGTGTATATATAAATCTATATACTTCGTTT  
TGAACACTCCCGTTCTCATTGCCTGCGTTGGCTGTACTGACGAATTCAACTTTTCACCGCACGCGAGTTGA  
ATTCGTCCCCTGTACAGCCTCTGTGCGGACGCCTTAACGGCCCTTCGACGCCGACGTGCGGCTGCGGCGCG  
CATCTGTGCACACGTATGCAAGCGTGGTCTCACTGTCGCCCCGTCTGGCGCGCGCGCGCTGTACTTTTTTGA  
TCGCCGCTATATCCCGATGTTCACTCTGTATGTGCGTCAACTTAGCGGCGGTGACTTAGCGTCGATTTTTG  
GTACTTGGTATCCGAAAAGGAATCGGTCATTTTAAATGCATTTATTTATGTTTTTAAAGCACAGAACCTAA  
TAAATTTAAATGCAGAATTGTAAAAAATTAATTTATTTACTGCCTACATTCATTTGTTTTTGAATTTTAAAT  
TATAATATGGGTAAACCAAGGGGTTTAAATATTAGGTTTCCACCATTCCATAAATATCCAAATTTAGGGAT  
AATGGCCCCGAAAACCGCATATACACGATTAAAGCCTATAGTTTCACCTAGACAACCTGTGAAAATTTGAT  
TAAAATCTTCGGTACCATTTTTTAAAGATATTTGGAAAAGAGTGCAACAACCCCCATGTCAGCCCCATATAAA  
ATGACCGCAAAAAATCAACCTTCTTATTTCTTAACTCAGAGACAATGTCCCTCAATGCACGCTATACCCTC  
TTGTAGATACATATTTTAAAGAAGCTTTAGGCACTAAATTTAAGTAAATGGACGGTACAGATTTTTCAGAAA  
ATTATTTACTTGTAACCAACCTCATATAGTTCATTCATAAAGTCTATCGAACTGCTATTTCTACGTGAAC  
TGAATCACTGCCTGGCATCAGTGTGAAACAATTTGTACAGAATTGGGCGGGAACCAATCCAATTTGAAT  
AATATGTTATCATGAAAATTACTTATTGTTAACAATAAGTTTATAGAGCGAAATTAGACAGATTTTCAACT  
GGCAGATAATGTTAAGAATCGAAAAATTATTACGAAAAGTTTTAAGTTTCGTAAGAAATATTAGAGCTTTA

ATATTTTGTATAACCCTTATTGGTGAGTTGTTTTACCCGTTTCAGGCTGCCTACTCAAAAAGAACGCCAGGA  
CGTATCTAGTGGTAGTAATCATGTTAGCAGTAAACTAGAAATTAGCAATAATATTAGTGATATGTCTAGCA  
TAGAAAATAATAATTCTAATTATAGTCTTAATGAGCCTACAAATTGTCCGTCTGAGTTTAATAATACGCAT  
GCTTTGTCGAAGCGACATTAAAATGCTTTCGGAAAAAATACCACAATTTTCTTGATAGCTTAAACAGAGA  
AGTTCAGTTAGTTAGTAATTTGAAAGGATGCCGCGCAGCACTTTCAGGTTACAACAATTTGGATACTGAA  
ATGAGTATCCAAGAATTTATGGCCACGTTAAATCAATTGTGTGCGATTAAAAAATAACATTGAACA  
CATTATTCGAGAAGCATACTCTTCATAGCAATGCATGTGTTTTGCACTTTAAGTCAATTAGACTTAACA  
CAAACCTCTTTTGCTGCATATGGTTACTGCAAAGATCCATCATGCAACTACTTCTTGTTCCATGGCAGCCAA  
CATATCTCCCATACAATTGGCCTTAAAAAGTCAACGCAATGCAGAACAAATAAATAGATTTATAGAAAAGG  
CTTCCATTAGAAACTCTTCTGCGTTCGAGTATAGATCAAAAAAATAAGGACAAAATCAATATGTCTCG  
AGCCAGAGTTGGTAATGATCAGATTACTAATGAGAACTACCCTTTTATAGAAATTTAATTTTCGGAGGAA  
AATTGACTTTGACAACTCACGGATAAATCGTCCTTGCTTTAAGCCGTTTTTATTATTTGTCTTTATAAACT  
ATATTTAAGCGTTTTTAAAGAATGATTCTATAGGCCCATTAAGGCTCTTTTATTAGATTTATCAATAAAAG  
TAATGATAATATTGGTTCAAAAAGGTGCGTAAACAATATATTTATTTAAATTAGATCCAGCATTTCTGCA  
CTTAAATAAATATTTGACGTACAGAAGTTGCTTTTATATTGTGATACAAGTTCTGTAACCTTCTGTACGTATT  
TCTTGAAGATTAAGTTTAAATGGACTATTTTCGGCAATGGACAGCAACGTTGGATCATTGACGACTTCCTT  
ACTTACTCCCAATTTTATACTGTCTATCAAATAAAATGTGGATGGCTCTTCACAATATTTAGTAAAATAAT  
TAGCGGCATCATCCACAATATTATTAACATATGGAGAAAGAAGTATTATTGCAATATTTTCGGAACCATTTT  
TCTAATTTTCCAATATTATTTATGGAATATGCACAACCCAAGGCATTTCTTAAAAATGATTTAAGATCAAT  
ATTGTGCAAAGCAACTACTTCATCTATGTTGCGACACTTAATTTTGCTGTAGTGGCTCATACAAAATTGAA  
CCCAGACTTTTGGAATGTGCGATTTAAATTATACAAAAAACTAAAACAAATTCATTGTACGTTGCAAG  
ATCAATGTTGTTATATTCTTTTAAATGGCTCCAATTATTGCAAACTGACATCAGTTATAATTCTTTTGCA  
AATAGGCCATTTGAATTTATTTTTTATGCAAACTCGCGCAGCTCACATAGAAATCTGCCTATATCTGACG  
ATTTATGATTGGAGAGAATCGCATGTGCGACAGGAAAAACGATTGGAAGCTCTGGAATATAAGCAACCAA  
TGAATATAAAAAATGTACATTTTTTGATCAAGTTCATTGGCTGTACTACATTCCCAGTCGCATCAATATGCA  
GTGTCTGTCCCATAAAAATATTTCTAGTTTCATAGAAAGTAACTGAATAAAGTTGGCATAACACATTAGTAA  
TCATATCGAAGGTATCTTTAAATGGATCTTTGTCAAAATCAAATTTTCCATTTTCTTCGAAATTAATTTT  
TATAAAAGGGTAGTTTCTCATTAGTAATCTGATCATTACCAACTCTGGCTCGAGACATATTGATTTTTTTAT  
TTTTCTTTTTTGATCTATATTCAAACGCAGAAAGAGTTTCTAATGGAAGCCTTTTCTATAAATCTATTTTTCG  
TTCTGCACCACGTTGACTTTTTTAAGGCCAATTGTATGGGAGATATGTTGGCTGCTTGTGTATACACTTACA  
ACACCGTCAAATGTCCCATGGAACAAAACGTAATTGCATGACGGATCTTTGCAGTAACCATATGCAGCAA  
AAGAATTTTTGTAAATCTAATTGACTTAAATACAAAATACATGCGTTGTTATGAGAAGTGTATGCTTCT  
CGAATAATGTGATCAATGCTTTTTTTTTTTTAAATCACACACAATTGATTTAACGTGGCCATAAATTCTTGGA  
TACTCATTTTCAGTATCCAAATTGTTGTAACCTGAAAGTGCTGCGCGGCATCCTTTCAAATTACTAACTAAC  
TGAACCTCTCTGTTTAAGCTATCATGAAAATTGTGGTATTTTTTCCGAAAGCATTTTAATGTCGCTTCGACA  
AAGCATGCGTCATTATTAACTCAGACGGACAATTTGTAGGCTCAATAAGACTATAATTAGAATTATTATT  
TTCTATGCTAGACATATGACTAATATTATTGCTAATTTCTAGTTTACTGCTTACATGATTACTACCACTAGA  
TACGTCCTGGCGTTCTTTTGAGTAGGCAGCCTGAAAGGGGTAAAACAACCTACCAATTAGGGTTATAAAA  
AATATTAAGCTTTTATGATTACTTACGCATTTAAAACCTTTTCGTAATAATTGTTTCGATTCTTAACATTATCT  
GCCAGTTGAAAATCTGTCTAATTTTCGCTCTATAAACTTATTGTTAACAATAAGTAATATAGATTGAAAATC  
AGTTGGACTTAAGTTTCCAACCTGGAGATATTATGCTTCTAGCAATGGCATCACGAAATCCAAGAGAGATT  
GTCCTTAAAAAATTGTTTATATATTAATGGTAAAATTAATCGAATAAGTTAAGCAACAATTTTTTATACC  
CTTGCAGAGGGTATTATAATTTTGTCTGAAATGTGTAACGCATAGAAGGAGACATCTCCGACCCCATAA  
AGTATATATATTCTTAATCAGCATCAACAGCCGAGTCGATATAGCCATGTCCGTCTGTCCGTCTGTCTGTTT  
CTATGCGAACTAGTCCCTCAGTTTTAAAGCTATCTTAATGAACTTTGCAGAACTCCCTCTTTCTGTTGCAC  
GCAGCACATATGTGAAAACCAGCTGGATCGGACCACTATATCATATAGCTGCCATAGGAACGATCGGTCTG  
AAAATTAAGTTTTTGTATGAAAAAACATTTTGTNTNTCAAGATATCTTGACCAAACCTCGGCATTTATTAGT  
TTTACTTTACTCCTCATATATATGCAAAATCCTATTAAGATCGGACCACTATATCATATAGCTGCCATAGG  
AACGATCGGTGCAAAATTAAGTTTTTGTATGAAAAAACATTTTGTTTTTTCAAGATATCTTGACCAAACCTCG  
GATTTATTAGTTTTTACTTTACTCCTCATATATATGCAAAATCCTATTAAGATCGGACCACTATATCATATA  
GCTGCCATAGGAACGATCGGTGCAAAATTAAGTTTTTGTATGAAAAAACATTTTGTTTATCAAGATATCTT  
GACCAAACCTCGGCATTTACTANTTTNCNNGTACTCCTCANATANGGGCAAAGCACTATGAGCATTATGAA  
AAGGTTGGGTCTGCAAGGGTATTAGATCTTTGGCGTGCCGAAGATAGCCCTTCTTCTCGTTTTTAT

>Ref\_dvir\_685

TTCTAAATTCATACACAGAAGCAGGCATCCTGGACTAACAGTGTCTGATATACAACATGGGACCCAACTC  
TACTAAGGCTCGTCCAGAGAGCACACCTGTGGGAAGAGATCAAATCATTGCAATCGAGAAGAGTTGTTA  
AACCGTCCAGTTGTATCGCATCACTTAACCCCTTTTTTGGATGATTTTCGGAATTCTTAGAGTTGATGGGCGCT  
TGAAAACTCTTCGCTGGATTTTCGACGCTCGCCATCCAATAATTCTCCCGTGTCAACCACCCCATCACAAAC  
TCGGTCATCACACGGTTTCACAATCGGGACTTACACGCTGGTCCACGGGGCACTTCTTGCTCATATTCGGTT  
GCAGTATTGGCCGATTGGTGGGAAGGAAGACCGTATCCAAGGTGGTTGGAAAATGTGTGAGATGCTTTCGT  
GCCAAGCCTCGATTAATAGAGCATATAATGGGTGATCTGCCCAAAGAACGTTTGACTGCTTGTCGAGCCTT  
TGAAGTCTCTGGTGTGACTATTGTGGACCATTTTTCTATAAGCCAGACGTACGAAATAAAGCTCCAGTCA  
AATGTTACATGGCTGTCTTCGTCTGCTTCGCGACTAAAGCGGTTACCTGGAAGTGGTCAAGGATCTGTCTG  
ACAGCTTCTTTCTTGAATGCGCTTAAGAGGTTTATATCGACTCGAGGCAGGCCATCTCAGATATGGTCGGA  
TAACGCTACCAACTTTGTCTGGCGCCAAAAACGAGCTTCTGGATCTCAAGCGTCTATTTACAAGTCGTAATC  
ATATTGAGTCAGTGCATAATTTTTGCATGGCTGATTCCATTGATTGGAAATTTATACCTCCTCGTTCACCGC  
ATTTTGGCGGCCTTTGGGAAGCAGCAGTGAAGACAGCGAAACATCATTTTTATCGTGCTGTTGGATCTTGT  
GTTCTCAACTTCGAAGAGTTTCGCACCCTAGTCTGCCACATAGCATCGATAATTAATTCCAGGCCATTGTT  
TCCTCTTTCAGAAGATCCAGCAGATCTAGATGTGCTCACTCCAGCTCATTTCTTGATTGGTGGACCCAGCT  
CATCGTTCTTTGAACCTGATGTGACGCACCTTCAATTCAATCGTCTGGATGGCTGGCAACGCGTAACGTAC  
CTCCAACAACTGTTTTGGTCTCGCTGGCGTGAAGAATACTTAACACTGCTTCAGCAGCGCTCCAAATGGCG  
TACTCCGAAACCAGGCCTATGCGTCAACGACATAGTCCTCGTAAAGGATGAAAATCTGCCGCCTCTAAGG  
TGGCCACTGGCGAGAATCACAGAGTTAATCGTGGGAAAGGATGGAGTCGCTCGAGTAGCCATTTTGC  
CCGCAACAGGAGAAACGAGAAGAGCTGCAAACAAGCTATGCCTATTGCCCATCAGGGAATCTGTTGAAA  
GCCCATGCCTTCCAACGGGGGGGAGAATGTCTGGTTACGCAGCCAAAACAACCTGGAGCGACCTCGCAACTG  
ATAAGAGCAGCATCTTAATTTTTATCTTATAATACTCGCTCTGCAAAGCAAGTGCCTAAATTTGCTCTTAA  
GAATTCATTTACATAGAGCTGCCGCTCTTCGCTGTAACGATCGTTTTATTGCCCTAGCTTTACTTATGCGAA  
GGCCTCGATGCTGCGCATCGAGTTAGTTAAGTTCGTTTCGCTTCATGCATTTGGTACGCATCGGCCACTTGC  
ATTACTCAAAATTATAACTAATAATTGTCTCTTCGCTAAAATTGGCACGTACTAATTCGGGTTTCGCTTGCCT  
ATATACAAACTATTGTTCTTAAATAATAAGCACAGACCAATTCGGGTCTGCCTGCTTCTCGTAACTTTAAG  
AAATATAAAACAATTTTGAACACAAAAAATAAATAGTTAATTATTTCTATTTGTGAAAGCTATTGAAAAA  
GCTCAATAGCGCAACATTTGGTGACCCCGACGTGATTTTTATTTTTGTTGTTGTAAGATTATTTGCTTTACA  
TTAAAGCAATAATCTTAAAAGGCACCACCTGGCATTTCGTTTTGTGCACTTTATATACATACATACTTATC  
GCCGTCGCTTTGCCTACTCTCTCGGTGCTTAAAGTCTTTGCTCATTCGTGCGGTACTTATGTAAAAGCTAT  
TGCCGTTGCTTCATTACATAGCTTGACACTTGCGTTTCGCCGAAGTTCTTATTGTACAACCTATTGTTTTTTGA  
ACGGTTTGCATGTACTAGCGATCACCGTTGTTAGTTACTCAGCTAGTTTCGCACGCGCTTTCTATCACGCTT  
CTAATGGCAACCGAAAATAATGCCTCTAGTGCAGTGCCCTCTGCAAACAGGGTGACCTTTCTGAAGCGCA  
AAGCCATTTCAATTTATGACAGTTTGCAAACACTTCGAAATGCTCTAACTAATTCGCCACTTAGTGCAATT  
GATGAGTGCGGTCTTAGTGTTAGGCTGAAGCAAATCGAGCGGCTTCAGACCTCATTTGATATTACTCACAC  
TAGCCTCGAAGAACTAGACTTTGATGAAATCGGTAACCAATTGCGTGAGGACTTCGACGAGTTAGCAGTT  
TCTATGGAAATTTCGGTTTCGGAGTGAAATTGCGAAACGTGTCTCAATATTGCCCTGCTCAACATTTTCGCGA  
CCAATCTGTGCTGCCCTCGGTGACAGTTAGGGCAAAGGCACGCCAACACTACCCTCAATAAAGTTGCCTA  
CGTTCAGTGGTGGTTACACAGAATGGGCCGACTTTTATTCTATGTTTACAACCGTCATAGAAAATCATCCT  
GATCTAGCAGATATCGAAAAGCTGCAGCATCTTCGATCGTGCCTGAAGGATACAGCGCTGGACGCGATT  
GATCATTGGAAATAACAAACGATAATTATGCCATAGCACTTAATTTATTGGAGAAAAGGTTTAATAATAG  
ACGTTTGGTTTTTTCAGGCACACATACTTGAGATATTGGGGCTCAAGAGGGTGGCAGGTGGATCGGCCGTG  
TCGCTAAGGGAGTTATCCGACCAATTCAACGCACATTTTCGCGCGTTAAAGAGCATGGGCAACTCCGAAC  
AAATCGCTGGATGCATCATTGTGCAGATTATTTTACAAAAGCTGGACCCAATATCACAGCCAAATGGGA  
AAGAAAGGCTAGAGGATTCGTCTCGTTAATTTAATACCATCGTGGGAGCATATGGCTACGTTTCTGGA  
GCAGAGATGCCGAACAATGGAAACCGTAAATTTTGTATGGCAAGCTATGCCCTAGCCATCAGGTGGGA  
AAAACCTAGAGCAATTAACACCAGTAGATCGTCATTTATCGCCACTAACCACGACGCCCTGTCTGCGTCTT  
TTGTGACAGCCCTGGTCATAGTATATATAATTGTTCTCGATTTGGAAATTTGACCCCTGCATTACGGCTTA  
GGGAGGCAAAACGAGTTGCATTGTGCTTGAATTGCCTAAAGAAAGGTCATCAATTGCGATCATGCAGCTC  
TGGATGCTGTCTGGACCTGCGGGGCGAAACATCATTCTCTGCTGCATTTAAACAATTCCGTATTTCCGTCTG  
GTCAGCTGACTGAGCCTGCAAATTCATCGCCGATAGCCCATGCCTCTTTCGCTAAGTCATCGCCATCTACC  
TCCACATCTCTTGTGTTGCCAGTATTTTCAAGTAGTGATGTTGTGCTCTTGGCTACGGCTATGATCTTTGTAAGA  
AATCGCTCCGGCACTTTGATACCTTGTGCTGCCCTTTTGGATTCTGGTTCTCAGCTTTCCACCTTATAACGT  
CGCGCCTTGCTCAACAGCTTCAGCTAAAGAAGCACAAAGTCCTCAGCCATTGTCTCTGGTCTAGGAGATTCT



CGTTTTGAAACAGAAGGAAACACGGTCACTATCACAATACAGTCTCAAGTCTCTGAATACTCAACATGCC  
TTACAGCTCTGGTAGCGCCTAACATAACTGATAGTCAACCGAGTTTTACTATCAACACGACGAATTGGAA  
CATTCCCGATAACATAAAACTTGCAGATCCGTCTTTCTTTAAACCTCAACGCGTGGACTTGCTACTTGGAG  
CTAGCCTGTTTTACGACCTTCTCAGCGTCGGCCAGATAAGGCTTCTCCCAGGACTACCGTGTCTTCAAAAA  
ACACGGCTTGGTTGGGTAGTTTCTGGAGGCGGACCCCGCTTGAGTGGTTCTATGTTAATGGCAAAGCATAC  
TGCGGGCAAACCTTGAGTCAAGTTCTGAAGAACGTGCTGATGAATTGGTTCGAAGATTTTGGGAGATAGAA  
TCCTGCTTGGAAAGTACACCTACCACTTCAAAGGAAGAAAACATCTGTGAAGAACATTTTCGTAAAGACTC  
ATATCAGATTGCCTAGTGGCCAATATTAGTTCGTTTACCCTTCAAGCGAAGTTTGGAAATGTCTGGGGACG  
TCATACCAACAAGCCTTTCGTGCGTTCCTGACCCTGGAACGCAAACCTACAAAATCGTCCAGAATCTGAAG  
ATTCAATATTCAAACCTTCTAAAGGAATATTTGGATCTTGGTCATATGTCGCCTGTTGCTCCAGAGTCTATA  
GGACTTTGTCAATACTTTCTTCCTCATCACTGTGTCTTTAAAGAAGACAGTTCAACGACAAAATTGCGAGT  
CGTTTTTCGACGGCTCAGCAGCTACCTCGTCAGGTTATTCATTAAATGAACTATTGATGGCTGGACCTGTTA  
TTCAAAGCTCGCTGTTTCATATCCTTCTTCGCTTTCGTAATTTCCCGATCGCCCTAACAGGAGATATTGGAA  
AAATGTATCGCTGCGTACGCGTTTCAGCACCGGATGATTTTCTCCAATGCATTCTGTGGCGAGACTCGCCA  
GAACAGGATATAAAGATTTTTTAAGCTGGATACAGTTACATACGGAACAAAGCCAGCTTCATTCTCTCTAT  
CCGTGCTATGCATCAGCTGTCTATGGATGAGGAACTAATTTTCCAATTGGATCTCGGATTTTGGCGCGTG  
ACTTCTACGTTGATGACCTCATTTACAGGGGGTGATTCAATTCAAGAAGCAAAGGAACTTCTTAATCAGACG  
GCTGGAATCTTGGCAAGTGGGGGCTTCAAGTTGCGAAAGTGGTGTCTCAAACAATTCTGCTGTACTGAAAG  
GGATACCCGTAGAGGACAGAGAATCTTCCCTAAAGTTTGATGATGGTAGCGACATCACCAAACTCTTGG  
ACTCGCTTGGGACTCAGCGTCGGATCGATTGTTGTTTTCGTTTTCGTCCATTCAGCCAGAGATCTAAACCA  
TCCAAAAGGTCAATACTAATCGACCATAGCTCGCTTGTATGACCCGCCTTGGACTCATAGGGCCGGTAATT  
GCCAAGGCTAAAATCTTTATGCAGCAGATCTGGAAGGAGAAGCTTGAGTGGGACGAGAGCTTGCCATCAT  
CACTGGCAACAGCTTGGCATGATCTTTGCTGCAGTTTTGAGAAGGCACAGTTTCTTAAATTTCTCTGTCTC  
GTGTCAATACCTGCAGCAGAGTTAGAAGTTCACGGTTTCTGCGACGCCAGCATCGAAGCATATGGGGCCT  
GTGTCTACGTCTTTCTCGACGAACATCAGCCAGTTGTCAGCTGTTGTGTTCCAAATCGCGTGTAGCTCCTC  
TGAAAACAATCACAGTTCCAAAGCTAGAGCTCTGTGGTGCCGTCTTATTATCTAATCTCATGCGTGAGATA  
TCTAAAATGAATCTGTTTGATGGAAAATTCTACTGTTGGTCGGATTCTTCTGTATGCCTTTCCTGGATAAGG  
ACCGAGCCCTGCAAGCTCAATGTGTTTGTTGGCTAATCGCGTCAACAGCAGTTCAAGAGCTAACTAATGGC  
ATGGAAAATGGCGTTACGTGCCTACTTCACTCAACCCGGCAGATATACTCTCGAGAGGATCTACGCCAG  
TGAATTAGATCAATCGTCACTGTGGTTCAACGGCCCCAGAATTTCTAGTTAAAAACAAATTGGACTGGCCTG  
CTTCTTGCTTGTGAGAAAGGACAGAACTCGAACTTAAAAAAAGGGTCCTTATTGCGTCATCTCCCTTCGTT  
GATATAACTGTCACTTGTAAATACGTCAACTCATTTGATACAATGCAGCGTATATTTTCGGATATATTTATA  
AATTCATACACAGAAGCAGGCATCCTGGACCTAACAGTGTCTGATATAACAATGGGACCCAACTCTTAC  
TAAGGCTCGTCCAGAGAGCACACCTGTGGGAAGAGATCAAATCATTGCAATCGAGAAGAGTTGTTAAACC  
GTCCAGTTGTATCGCATCACTTAACCCTTTTTTGGATGATTTTCGGAATTCTTAGAGTTGATGGGCGCTTGAA  
AACTCTTCGCTGGATTTTCGACGCTCGCCATCCAATAATTCTCCCGTGTACCAACCCCATCACAACTCAG  
TCATCACACGGTTTCACAATCGGGACTTACACGCTGGTCCACGGGCACTTCTTGCTCATATTCGGTTGCAG  
TATTGGCCGATTGGTGGAAAGGAAGACCGTATCCAAGGTGGTTGGAAAATGTGTGAGATGCTTTCGTGCCA  
AGCCTCGATTAATAGAGCATATAATGGGTGATCTGCCCAAAGAACGTTTGACTGCTTGTGCGAGCCTTTGAA  
GTCTCTGGTGTGACTATTGTGGACCATTTTTCTATAAGCCAGACGTACGAAATAAAGCTCCAGTCAAATG  
TTACATGGCTGTCTTCGTCTGCTTCGCGACTAAAGCGGTTACCTGGAAGTGGTCAAGGATCTGTGCGACAG  
CTTCTTTCTTGAATGCGCTTAAGAGGTTTATATCGACTCGAGGCAGGCCATCTCAGATATGGTCGGATAAC  
GCTACCAACTTTGTGCGCGCCAAAAACGAGCTTCTGGATCTCAAGCGTCTATTTATAAGTCGTAATCATAT  
TGAGTCAGTGCATAATTTTTGCATGGCTGATTCCATTGATTGGAAATTTATACCTCCTCGTTCACCGCATTT  
TGGCGGCCTTTGGGAAGCAGCAGTGAAGACAGCGAAACATCATTTTTTATCGTGTGTTGGATCTTGTGTTT  
TCAACTTCGAAGAGTTTCGCACCCTAGTCTGCCACATAGCATCGATAATTAATTCCAGGCCCTCTTTCAG  
AAGATCC

>9\_rnd-1\_family-415\_\_LTR\_\_Gypsy

TATATATATAAGTTAACCCTGACTATTGGTATGTGCTGACCCAGCGTTCTGGGGAAGCCAATGACCAGA  
GTCATGTGGCGACGGATATGTCGCAACTATGTCACCGGCCGCGACGGTCATCCGACACCGCACACGAGGC  
GCTAACGCTGCACTTTTTCGAGAGCGGCGGCAGCGGTTCTACAGCAGCAACGGCGGCTCTGGGGCAGCGA  
CGGCGGCTCTGCAGGCATTGCTTAGATTGATAAAGATTGTATTTTTTTAGTCTAAGTTAGGAAACAATAAA  
AAGCGCGACGTATCGTCCCTTAAAGTCTCCCGTTAGTTAACTCATTTTTTTATATGCATTTTTTACATGCAAC  
CGGCAAACCCAAAGTTGCAGACATTAATGACTAATTGGCGCCCCAACCTAAAAACCCAATACAAAAAAA

AAACGCGATAAAACGGTTTCAAACCTCCAGTTGTGACAGCAGCGGTGGAATTCATCAAAATACACAAATA  
CACAACAATAGAATCATGTAAAGTGATTTGTGAAGTGAGAATAGAAAATTTTCGAGAACAATTTTTTTTCGA  
ATACGCACAAATTAATTTTGTAAAGTAAGAAAAGGAGTGTCTATTTCTGATTGAGGAAAAAATTTATGA  
GAATTATTTAAAAAATCCATTAGCTTAACCTTTTATGTGTTGTTTCGGTTTCA  
TACAGAGGTTTAAATTCGAATGAGCGACTGTGACTCCGACGTAGACGCGCATGAACACTACGATAGCGAC  
GACAGTATTTTAGCGAGGTTAATAAGGGGATTTGGAACATTGCAGGTATCAGGTTGTGTCACCCCACTG  
AACATAATACAGAAACAGACTCAGTTATGGACCCAGAGCAGTTGCGTGCGATAATTGAGGCCGCGAGTGCG  
GAGCGCACTCACAGCGCAGGCGCAAGAATTCGCGAATAGGGAAGCTACGCTAAGGCAAGAGCTTCAACA  
ACAAATTGCGCAGGTATCGAATAAGCTAAGAAACACACAACCTTCAGTCCCGGTAGTAAAGGTTTACAGG  
GAAGTTGAAATCATAGACGGGGTGAATGTAATGAGCCGCTCGACGTGGTAAAATGTCTTACCGAGTTCC  
ATGGGACTCAAGACACTTACGTGTCCTGGAGGCAGGCCGCGCATGCCGCCTATAAAAATTTTCAAAAATAC  
GACGGTAGTTTACGTCACTACCAAGCCACCGCAATCATTAGGAGTAAAGTGAGAGGCCCGGCAGACGCG  
GTTCTCGCCTCGTTTAAACACGCCGTTAACTTTGAGGCCATCATAGCGAGGATGGACTTCACTTATAGTGA  
TAAGCGGCCCTATCCATGTAATTGAACAGGAAATGGGTACGCTTAGGCAGGGCGGCATGTCCATTCTACAG  
TACTACGATGAGGTTGAAAAGAACTCACGTTACTCACAATAAAGCCCATATGTCATATGACAGCAATC  
TGGCAGCGGGAATGTGTGAAAAATTCAGGGGTGACGCACTTCGCGTATTTATCTCTGGATTAAACGCAG  
TCTAACCGATGTGTTGTTTTCGGCTCACCCCTCGGATCTACCGACGGCACTAGCGCTAGCCCAGGAGGTCG  
AGGCTAATCACGAGAGATATGCCTTCGCGACAAGTTTTGCTAGGGGGCAGGAAGAGCGATCTCGTCCAGA  
GCAGCGCCCAAGGGCGCCAGCAACAACAACAGCAAGAAAAAGCAATTCTCTCAGGGTGGCCAGGGCA  
AGAATCCTCATTTCAAGAAGCAGAACGGCCAATCCACAGACAAAGCCCAGAATAGAGCTGGGGCCGATG  
CCCCAGTTCCCATGGAAGTCGACCCTTCTTCTTCCAGGTTTAGGCAACCCACAACTTTTTCGAATTCCAG  
GGCTCGGCTAAGTTTAAACGCCAGCCAAGGTCAGGGAAATAAACGCTCCGCCGGATCGGAACGCGCGACA  
GGCCAAAGGAGGCAAAGGGTAGACCACGTCCAGGCGAGCGAGGCCGAGAGCGCAGGGTACACCGACGC  
GGCACAAGAGGCGTCAGACGAACAACAAGACGAACATAGCCCTGATTATGATAGCGATAGCGCTAATTTT  
TTAGGGGAAGGTCCCTGCTACCGTTCATTCGACGGAGAATAGCGGGGGTAGATATGAGATTTTTAATCGA  
CACGGGTGCGTCAAAAAATTACATCAGACCGCACAAACGCCTTAAAGGCGTCGTCCCGGTGCGAGTCCCCT  
TTCGTTGTCCACTCCATTCATGGGTCCAACAACATCGCCGAAAAATGCAAGTTATCCATGCTTGGGTGCGA  
CACATATTTTTTCTACTAGATTCTTTATCCACTTTTGATGGAATCATAGGGCTGGACCTGCTAAAGCAGGT  
GGGAGCGGTTTTATGCCTAAAAAAAGGTATGTTAATATTTGGTGCGACTTCGGAAGCGTTGCAGTACCAC  
AAATGTGTGAGCGTTAATCACACGAAAAATAAGGAAGTAGAGGCACCACCTGCGGTGAAGGCAGATTTT  
CTGCGAGTACTTCATCGAAACAACAAGGCTTTTTCGGGACTCCAACGAGGCGCTGCCTTATAACACGGCTG  
TTGTGGCCACGATCCGTACGACCGACGAAAATGTGGTCTACTCAAAGCTATACCCCTACCTAGGGGTGT  
AGAGGATTTTGTGCTTTCAGAAGTCAACGAACACTACTAAAAAACGGTATAATTAGAAAGTCGAAATCGCCC  
TACAACAATCCACTGTGGGTGGTCGATAAGAAAGGCACAGACGAGGTAGGCAATAGAAATAAACGTCTC  
GTAATAGACTTTAGGAAGCTCAACCTCAAGACGGTTGCCGACAAATATCCAATGCCAAGTATCACAATGA  
TACTGGCTAATCTGGGTAAAGCCAAGTACTTCACGACGCTCGACCTAAAGTCAGGTTATCACCAGATTAC  
GCTGGCGGAGCAGGATCGTGAGAAGACGGCCTTTTCGATCAATGGCGGGAAGTACGAATTCTGTGCGACTT  
CCCTTCGGTTTGAAGAATGCAGCAAGCATTTTTCAGAGAACCATAGATGACGTCCTGCGGGAGCAGATTG  
GAAAATCTTGCTACGTTTATGTAGATGACGTCATCGTCTTTTCGGAAAACGAGTCGGACCATGTCAGACAT  
GTCGACTGGGTATTAGGGAGCCTTTTAAACGCGAACATGCGCGTGCGGCACGAGAAGTCACAGTTTTTTA  
AAGAAAGCGTCGAGTACCTCGGCTTCATAGTGACTAAAGACGGTGCAAAGTCAGATCCAGAAAAGGTAA  
AGGCCATTCGGGAATATGCTGAGCCGACCACGGTGTTTGAAGTAAGATCCTTTTTGGGGCTGGCAAGCTA  
TTACCGCTGCTTTATCAAAGATTTTGCAGCAATAGCGAAACCAATCTCCGACATCCTGAAAGGGGAAAAC  
GGATCCATTAGCAAGTACAGGTCTAGAAAGGTCCCTATACAATTCAACGATGCTCAACGCAACGCGTTCC  
AGAAGCTTAGGAACATATTAGCGTCGGAAGACGTCATACTGATGTACCCGGACTATAAAAAACCATTTGA  
CTTGACCACAGACGCTTCAGCCTATGGCATAGGTGCTGTCTTGTGCGAAAATGGTCGCCCCATTACTATGA  
TATCCCGGTCCTTAAAGATAGGGAAGCAAACCTTCGCTACCAACGAGCGGGAGTTGCTTGCCATCGTCTG  
GGCATTGGGTAAGTTACGGCACTTTCCTTTACGGGGTTAGGGACATAAATATCTTCACTGATCACCAGCCTC  
TCACGTTCTCGGTATCCGAGAGCAATCCCAATGCAAAAATAAAGCGCTGGAAAGCGCGCATTGATGAAAC  
AGGGGCTAAGCTTTTCTATAAGCCTGGTAAAGAGAATCATGTAGCGGACGCGCTGTCGCGCCAGAACGTG  
AACGCCCTGCAGGGTAGCCGCGATGAACCAGAATCTGACGCGGCCACGATTACAGTGAATTGTCCCTGT  
CTTACACAATCGATTGACGGAGAAGCCCTTAACTGCTTCCGAAACCAGGTTGTATTAGAGGAATCTCG  
CTTTCCTTTAAAAAGAAATTTTACACTTTTCGGCGAGAAAACCCGCCATTTGATAAACTTTACCGATACGG  
TCGCCCTCATCGAAACGATAAAGGCCATCATTAAACCAAACGTGGTTAATGCGTTTCACTGTACTCTCCA

ATCTTGGCCAGTTTCCAGCACGAGTTGGTAAGAGCCTTTCGACTACGAAGTTTTGGTATTGCAAAAACCTT  
CGTGGCCGACGTGTTTCGACGTCAGTGATAGAAGAGAAATCATCACTAGGGAACACAACCGAGCCCATAG  
GGCGGCTCAGGAGAATGTAAAACAGGTCATGACGGAGTACTATTTCCCTAAAATGACCAAATTAGCTAAT  
GAAGTGGTGCTTAACTGTAGAATTTGCACGAAAGCAAAATACGACAGACACCCAAAGAAGCAGGAACCTC  
GGCCAGACGCCACTTCCCTCACAGACTGGAGAAATGTTGCACATTGACATTTTCTCCACGGACAAAAAGT  
TCTTCTTACTTGTGTTGACAAGTTCTCGAAGTTTGGCGGTAGTCCAGCCTATCGCGTCTCGAACGATAGAA  
GACACGAGACCACCTCTGCTGGTCTTAATGAATATTTTCCCTTCGGCTAAGCAAGTGTATTGCGACAATGA  
GCTCGCATTCAAGTCAGAGACTATCAGGTCTCTGCTATTGAATAACTACGGCGTAAGCGTGATAAATGCG  
CCTCCCCTTCACAGCACGTCCAACGGTCAGGTAGAGCGCTTTCACAGCACTCTTCTGGAGATAGCTAGGTG  
CTTAAAGCTCCAAGGGGTATAGTTGACACAGTCGACCTTATCCTGCAGGCCACTATCGAGTATAACAAT  
TCCATTCACTCAGTGGTTGAGAAGAAGCCTAAGGACATCCTGCTTGACTCGCTTCCGGAATCCACCCACGA  
GGTTAGAGGCAGGATAGAAAGGGCCCAAATCCAGCAGAACGCTAGGGTTAATAAAATGCGTCGGAACAG  
AGTCTTCGAGGTAGGAGAAAAGGTCTGGTAAAGACGAACCGCAGACTAGGCAACAAGCTATCGCCTTTG  
TGCATTGAAAAAAGGTTGAAGCGGACTTGGGGACAACGGTCCTCATTGGGGGGAGGGTGGTCCACAAG  
GACAACCTCCGTTGAATTGAAAGCACAGTTTTTTTTTTCATTACCATTCCGATAACAGTAGTTTCAACATTTTA  
GGATTACGTTACCATACTTTCAATCATGTCCATGACAACGGCTCGGGTGACGGACTACTCGCACGCGGA  
CTACATACCGATTATGGACGGGGACATTCTACTTTGGGACAGTTACGGATACTTACGTCACACTACCAATC  
TCACGGACTATAGGACAATGACTGAGGAGACCATGAAGCTGACGGGAATGTTTCCACAATCCCATATGAG  
GAAATTGCTGGAAATTGACACTGGACATGTACTGGACATGTTGTCCGCTCTCGATGTGCACCATCGCAAG  
GTAAGAAGCCTTGACTTCTTGGGAACAGCCCTTAAGGTTGTAGCGGGCACCCCGGACGCAAACGACTTCA  
GGAAAACAGAACTGACTCAGATGCAGCTGGTCACTGCAAGCAACAGACAAATTTCTATAAATTCCAGGAT  
GCAGGAAAAGATCAATCAACTGACCGACACCGTTAACAGAATTATTAAGTCCTCAAAAGAAAAGCAGGC  
CGACACTGGCCACCTCTTTGAAACCTTAAGCACACGCAATAGAATGATAATAACAGAAATAGGGAACCTT  
ATGCTTACTTTAACCCTAGAAAAAATTAACGTAATAAACCCACAATAATAGATCATTCTGATCTTATGAA  
TATTCTCACTGACCAATCACAGGGACCCCTATCACTGACATATTGAAAGTATCTAATATTAAGGTAGAGC  
GTAAGGATAATGTAATAAGTTTGATAATCGAATTCCCTATAATAAGTAAGCAATGCAGGAAGATAACAAT  
TTTCCCAGTCGCCCACAACGGTTCTGTGCTCCAACCTCCACGACAATCTTGTGGCCGATTGCGACGGACAGA  
TGTGGCCGTAGCCAATTGCTCACAACTGCGACTGCCACATTCTGCAAGCGTTCCAAGAGCATCAGTTGC  
GCACAAGGCCTCCATGCAGGGGGTACAGCCCATTGCCAAACGCAGCCGAGTCATCTTGCCCCTGTCACCA  
TAGTGGACGACGGCATCATCGTCATTAACGATCGTAGCGCAATACTCACCTACGACGATTGCACTGCGAT  
GAAGATAGATGGGACAAACCTCGTCACCTTCTCGTCCTATGCCACCGTAAATGGCACGCGATACTTCAAT  
CGCAAGAGCGTGCAAAATCGGTTCCCGGTGGTAGCGGCATCACCGTTGCTTAACATCAGCGGCCATGACT  
CGATACTCAGCCTTCCCTACATTACCCGCCTGAGTGAAAACAACCTTAACATCAAAAGAGGTCAGAGA  
CAGTATTGCAGTCGGAAATACATTGGCGATTTCCCTTCGGCATAATGCTGTTGGCCTGTGCTGTGGGGGCTG  
GAGTCTACTGGCTCCATAGGCTGACAATCAAGCGTCGAAACTCCCGGAAGATCTCGAAGATATTGGAAAA  
CTTAAATGCGACCGAGGACGGTCGATCCTCGAGAGGGGGGAGTAGTTAACCCTGACTATTGGTATGTGCT  
GACCCAGCGTTCTGGGGAAGCCAATGACCAGAGTCATGTGGCGACGGATATGTCGCAACTATGTCACCGG  
CCGCGACGGTCATCCGACACCGCACACGAGGCGCTAACGCTGCACTTTTGCGAGAGCGGCGGCAGCGGTT  
CTACAGCAGCAACGGCGGCTCTGGGGCAGCGACGGCGGCTCTGCAGGCATTGCTTAGATTGATAAAGATT  
GTATTTTTNAGTCTAAGTTAGGAAACAATAAAAGCGCGACGTATCGTCCCTTAAAGTCTCCCGTTAGTTAA  
CTCATTTTTTATATGCATTTTTTACATGCAACCGGCAAACCCAAAGTTGCAGACATTAATGCACTAATTTAT  
ATA

>9\_rnd-1\_family-468\_\_Unknown

TAAACAACATTAACTGTATATATAATAATAGTAATAATATAACAATTGACATTTTCGAAAATACATTGGA  
AAATAATTGTGGCTATGAAATTTTGATATATTGTATATAATTATTGATATATGATTATTAATATACAAATA  
AAATTATAAATGACATTAATCTTTATTTATTTATTAACCTATATAAAATTATATTGAATTGTTATAAAATTA  
GTACATGAAAACGTTACAGTGCATGGCAGCATTTGGAAAAAATATCGCCATTATAGATGATGTGTCAAAA  
ACCTATATAGGGATGGTGTGCGCAATGCATGTCATATGAAAAATTTTAAATACGGTAAATTCATATGACT  
GTGGAGTGTTGCCCTTGCCGGCATAATGTTTATAAAAAGAATAATGAAGTTATAAAAAGTGTGTTATTAAATT  
AGTACATGAAGACATTAAGGTGAATGGTAGCATTTGGAAAAATATATCGCCATTATAGATGATGTGTCAANA  
AAAACCTATATAGGGAGTGGTGTGCGCAAGGCATGTCATATGAAAAAATTTTAAATACGGTAAATTC  
ATATGACTGTGGAGTGTTGCCTTGCCGGCATAAGTCAATTATGTTTATACAAAAAGAATAATGAAGTTATA  
AAAGTGTATTATTAAATTGGTACATGAAGACATTAAGGTGAATGGTAGGTGAAAATAATGGTGAATGGT  
GAAAATAAGAATCTAATAAAAAAATGNNGCTTAANTTTTTTTCCAANTAAAACAGTTATTTCCCTCATAACA

GTCATTCTTTTTGACCGCTTTCGTGAGCACTATCCAAACTATTTTATTAAGTTAGAGTCGTTAGTTTCAAGT  
TGCTTACAATTAATCGGGCATATGTCGGGAATTTAGCTAAACAATTATTTTATATTTATAAGCATTTTTTATT  
AACTTAGTTTATGCATCAAGTATAAAATTTATTTTCTTCTCGTAATGTGATGTAGTGCAACACTTTGATTTA  
CATATAAGTGAGATATCGATAATAGCATGAAAATAAGAATCTAATAAAAAAATGCGGCTTAATTTTTTTT  
CCAATAAAACAGTTATTTCTCATAACAGTTATTCTTTTTGACCGCTTTCATTTTTACAATCCATCATCAAT  
TTAATATCTCTCTCACATCTTCATTTTAATTGCATAAATATCGACTAGTTTTTACCATAACGCGAGCAAAAT  
GAACGCGTTTTCGAGTATTCAATTTGATAGTGCAGAGCTGCCTTAAAAGTACATTTGAAGAAATGACTTGA  
CTTGCTCGTCGCGTAACCTCGAAAACCTGGCGCCATTAAATTTCTGGAAACTTTGCGAGAGGATGTATTTCT  
TAATTAAGTGCGAGCAATATTATGTATTGCANAAAAAATTAATAAGTGAAGGAAGTAAAATGTGCAT  
TGCAAAATTTAGCAAAGGCAGTTTCGAAGCGGAGATTATTGATTTCGCGAGGTAAGTTGAGCTTGACATTT  
CAATAATTATATTTGTCTGTATATGTACTTTTATTTTCATTAGAAGATCGTGAAATACTGGACCAGCAATGT  
CAAGAACTTAATAAGGGTATGTACATAAATCAATAACAGTTTTGTCATTTTTCGCATATGCATATTTATACA  
ATAGTCTATATACATATGTACATAGGCAATGCAATAATCGTTTTTTAATTTAAATTAATAATAATACA  
TTAAATATTTATAGACTTACTAGAAGCAGATACTAAGTTAAATGAAAGTGAAGCAACAACGAACGATGAT  
AAATCCGGTAAGTACAATACTAATGTGCCTTTGAAATAAATTAATGAGCATTGTCTTTTTAAAAGAGGNGC  
CATTAGCAGCTTATAAGTCAAATACTGACACAACAATAAAAAGCAACCTGGGACAATTTGAAGCTTTTCGG  
TATGTGTGCAATTATTAAAACTAAGCCAGGACTAAATAAAAAATCATTTGCATTACACTTCTGACAGAGTT  
ATGTTTTGTAATGTATTTATTATTATATGTTAAGTCTTAAATATGCATAATTGTGAGTACCACAGTTTTAAG  
GCCAGAGTCGGAAAATATCAAAAGATTTATAGCCTTATTAGTTGTTGAAAACAATTTAATTATCATTGT  
TTATGAGTTAATCACATATGCAAAATCAGATCAATTTATTATAAAAAGCTACACAAAAGACACAATCGGT  
CATTACTTTTCTAGGAATAGTGTATTCTCTTGTACGCTATATGCCTCCGGACGTACAAACCTTTTTTAGTAT  
TCAAACAGTTTTTTGCTAATTTGTATTTTAACTAAAGCTAACATTGTATACTGATAATACTCGCCTTTTGAT  
TGTTACCTAATTTGTGCTAGTACCAGCTATTTTGTGTTTCGTTTCAGGTGTCTTGTGCCCCGTCTTATATTAAC  
ATGTAAAATAAATAAATGTATTAATAAAAATACTTATACCTTAACATAATAGACAAAGACTGGCCTCTAAA  
TGGCTAGATTCCCCAGCATAAGCATTTTATACATTTAAATCGCTTGGTAATTTTCCACATTCTATTCAAGGA  
GTCGATTCCAACATACTCCGGATATAACTAATCAGTCCAGCACTTATATACTTCCAAGTTTAACTTACAC  
AATGTAACCTCCACTAAGTGATATAAGGGATTTGATTATTCCTAATTGTGAAAACCTTTTTTGCTTGTTTTGTA  
ATAAATTGCAATCAAAATTCGTTTCGTCACCTTGCATAATAATAAGCCACAAGTAAAAAAGTGTTTATGCCTG  
TCGAAAAATGACAAAACCTCGAAGAGTAGTTATTAATGAGATTTGGAGTAATGGCGATTAAATCGACAATA  
TCGATGCATCGTTAAATAACGAAATTTTAAAGCGAATTAACCTCTAAAAACGAATATGTTGTCATATGTTGC  
AAGGGATGTTCTGGATTTTTTCCCCAAAAGTCACAATACGCAGTCATATAAATAATTGCATAGGCGGCGAT  
CATAAGAAAGGAACTCCTGACTTGCTTAAGCAAGGTCGCTCTAAAACCGGCTCTATGCATAAAAGTGCAA  
GTGACGTTCTCTTGTAAAGCTATATGCCTCCTGACGTATTTAAACCGTTTTTGTTAATTTTTTTTATTTATTAC  
TAAGGCTATTTTTATATACTTTGATATTACTCAAATTTTATTTTGTTAACCTGATTTCGTGTTTATTCCAGCTAG  
TTTGTGTTTCGTTTCAACTGTCTTGTGCTCGTCTTATATTTATATGTTTCTAACAAAGGTAATGAAAAGTATA  
AATACATTTTTTTTATATATAAATAAANTCCTTATCATGATCAGTACAGATATACATTTTTTTTAAACAACATT  
CATGCTGCTTAACGTTATATAAAAATGATTGTATTAAAAAATATAAGATGCAATAGAGACACATCCGAAT  
GATCATAGCAAATGCCAATTAACCTGCAACTGAAGTGGAGGTATACACTATGCCATATCCTTAAAGGTCTG  
AAAGTTAAGCAAAATAAATGTTCTTAAATNTGTATATGGCACTGCTCCTAGTGCTACTATATTGAATACAA  
AATATTTACTTAAAAATATTGAATTACGTCCATTAAATAATTAATAAGATTTCCTTTTTATCTATTAATTATT  
AAATATATTCAAANAGATGCATCCGAACAATTTATAAACACAACCTCAAATGCATCGGCTAATAGTGGAT  
CTTTAGGACTTAACGACTTTGGCTCTAATTGTTTAGATTCATCGGCAAAAATCAAATCATTCCACGATAA  
ACGATTCATTTCAATCGCTTAATACTAATTGTCCAGATTCCACGCAAGGATTTCGATTCCAGTTATGCTCCG  
GATATAACTAACCGGTCCAGCATTTTAAATAATTCCAACATTAAACAAGTTTTTTCTTACACAACCTGAAAC  
TCCACTAAGTGATGTAAGGGATTTAATTATTCCAACCTGCGAAAACCCAAACAAATTGTAAGAAACATTTTT  
GCTTATTTTGCAATAAATTGCAACAAAATTTGCTCGTCACTTGCAGATTGTTTCATAAAAAATGAGCCGCAA  
GTACAAAAATTTTTGTTTCTGTCGAAAAATGACAAAACCTCGCAGATTACTTATTGATGAGATTAGGAAAA  
ATGGTGATTATATCCATAATATCGATGCATCGTTAAATAACGGAACCTAATCGTGCCCCGTCAAAAGCGT  
GTAAACTCTAAAAACGAAGCGGTTGATTTTCATATGTTGCAAGGGATGTTCCGGATTTTTTCCCCAAAAGCAC  
AATACGGAGTCATATTAATAATTGCAAAGGGAGCGATCATAAGAAAGGAACTCGTGACTTGCTTAAACAA  
GGTCGCTCCAAAACCGGCTTCATCCATAAAAGTGCAAATGACGTTGTGCGCACAAAAATAATGCCTGTTT  
TAAATGATGATCCCATTTCTAGAAATCTTATATATGATGAATTGATTGTTTTATTTCGCAAACGCAGAATCT  
ATGAAGCACGGCGAACTTCAGTACGATATGATCAGAGCAAACATGAGATTGCTCAGCAGACTATTACATG  
AAATAAAAAAATCAGAATCTAATGAGATACAGGAACCTTAAAGACGCCATTAATCCCAAACATTTGGATTT

GATGATATCTTGTATCAGAAAAGTGGCTCAGTGGGACTCTTCTTCGTTGTTTTTTTAAAAACACCTTCAGTTGC  
AACGAACCTTACAACCTCTAATTA AAAAAGTGC GCAAAAATATTGTGGACTCATTGCATTA AAAACACAAAAT  
CATGCAAAAAAAAATTAAAGATTTTCTTGTCTATGGGAAACCGAAATTCCTCTTTTATAAACAAAAAAA  
GCTATAGAGGACCAGTCAAAGAAAAAAGAGCCCTACCAACTATTTTACCATGTAAAGAAGACATCAAAA  
ACTGTTTGATTATGTGATAAAAAATCGGAAAGCGCTCTGAGTGTGCTAAAAATTAAGTTTGATTTTTTATC  
ATGGACATCGTTGATACAAAGCACACTAATTGGCCTTCAAATTTTTTAACCGCCGTAGAGCCGGTGAATTTG  
AAAGACTAACAATTGAGAACTATCTAACAGGGCACGCCATCGATGAAAATGTAGATAAAGAAAACTTCG  
AACGTCTCACGAAAGAAACTAGAGAAATCGCTCAAAAATACACAAGATTGACTATTCGTGGAAAACTCA  
ATCGAACTGTGCCAGTGCTGCTCACACCGTTTGACAAGTATTGTATAGAACTATTCTCAAACATCGTAAA  
AGAGCTGGTGT TAAAAAAATAATGATTACATATTTAGCGTGCCTAACGCCAAGCCCTTAGCAAANCAATA  
TGTAAGGGCTTGTCCGATTCTAAAAAAATTTGCCCAGGAATGTGGGGCTCGCTGCCCAGGGGCTTTACGG  
GGAACGATGCTTCGAAAGCATT TAGCTACCTATACATCGATGCTTAACGTCAAAGATGTCCAAATTGATA  
GGCTTGCCAATTTTATGGGTCATCATAAAGATATACATAAAGAAATCTACAGAATCCCTGTAACAGTAGC  
GGAGATAGCCGAAGTATCCCAGATGCTTATGGCAGCTCTTGGAATAATGTTGAGGATGAAAACACAGTA  
GCCCTTGATCAGTTTCGAAGAAAGTAAGTACGTAGATT CATCAAGTTTGTGGGTGATACTAAGAGTAGTTA  
TGGTGAAAAATGTAATATCTTAACTTAACTAATAATTACTTGTGCGGGCTTATTGTGAATGTTTTTACATTGT  
ACCTGAAATCCATTTTGCAGATGATCCTTTAGAGGATTCGGAATCAGATTATTCTGAACAGCGATCAGAA  
AGCGACTTCAATATTTCCGATGATGANATTGTAGAAAATCGAATAAAAAGGAAAGCGCCCAAGTAGTAA  
GTATTAAATTGCAACCTACATATTTATGTCACGTGCTTACATGCATCGCGTTTAGGCTATCCTATTTATCCT  
CATTGACAAAGTAAAAAGAGATATCGCGCTTGTGAAATGTCCGATCGTCTGTTCAAACGAACGCGATATT  
TTGCTGGCCCATTAAGTTATATCAACGAGAAGTAAAGTGCTAAAATTATATAATGACGACCACTGCGGC  
GTGGTAAATCGCAAAAATCGTCCTAAATAACAAACCTTATACAATCATAGAGATTGACTAACTTTTAGTTG  
AAGACGAAGATGTTTAACTGGGTGCGTGCGCAATGTTTAAAATTAATATCACCTAATAAATTGTTCTGGTA  
GGCTGTATTAAGCTGTTATTGGTCTGTGATTGAGTATTGCGACGGTTGCAACCGACTGCGACGCTTCTAAT  
TGATTTTTATTATTACTAAAACGTTAATCTTTTGCACACTAAATTATATTAACTTTATTATTTAACAGGA  
TCATCATTTTGAAAAACCATAAGAAACCGTTGGTTCGAATGAAGAGCGTGAAGAAATATACCAGGCTTTTG  
GAGACAATTCTGTTGTCTNTTAAAGGATCGCCGTCGCTTAAGCAATGCAACGCGGTTATAAATAATTCTAC  
ATATCTAAAATGTAGGACACCGGCGCAAGTAAAAACATGGATAGATAATCAGCGCAAGGCTAAATCAAG  
AAAATCAACTCCGCAAATAGATTAAATAATGAATATGTTGACCATATTTAGAACTAAATTGACTATACTTT  
TTCGTATTTTTTTATGTTAATATTAATTTATGCTAAGAATATTTGGAATTTGTTAAAAATGCATACTATAAA  
TGTATTTAATAACGTCATTTATGTAAATTCATATTGTTAATTTTACTTTTAACTAAGATGATTTGAACTG  
CATTCAAATGTATTTGAGTTTAAATTTCAACTAAGCCAGCCTGGCACTGAATTTAAATGTATAGATTTAA  
TAAAATATTGCTGAGTTTATAGGCGTTATACTTACATTCGAGTTTTGTTGTATTTACCGTTCTGTGTCC  
TCATACCCTCTATATAATCGCTATATATATAAAATATTTGCATCTTCCTCAGTACGTTATTTGGGGACAGCC  
ATTTGATTGTTATTTACTAAATTGGGGTGTGAACTGG

>160\_rnd-6\_family-772\_\_RC\_\_Helitron

CCACCGCAGAGCTATAAATGAAATTAATAACCCAACTTTAATTGCCAACCAATTTAAACCACAATTTAAA  
TGTAATTGTCTTTTTTCAGAAATATACAAATATTCTATGGTACAATAAGATATACTGTAGAAAATTTTATAAA  
GATCGGTTAAGAAAAACCAAAGTTATATGCAACTGCGCAATTGAATGGGGCAGCAGCTTTAAGAATTTCT  
CTATACATGTACACACACACATTCATGCGCGTCTGCTTCGCATTCTAGCAGCATGGTAATTGAATTTTTTTT  
GTAATGTTATTTTAGTTCCCTTTTTTATCATAAGTACTTAATTGTTGGTGTGGCTGCTGAGTAGAGGTATAGC  
AGGTGGTGC GGTCTGCCGCGAGTTCGAGCCCTACCGGGGAAAGTATTATTATTTATATTTTTTTTGTCTGGT  
GTGGCTGTTGAGTAGAGTCGACAGCAAGTAATGCGGTCAGTTGCGAGTTCGAGCCCTGCCAAGGGA ACTT  
TTTTTTATTAATTTATTTGATGCTGGAATAAGAGGGTTCAGGGTATCCCTAGTCGGGAGCTCCCTAGCTC  
CCCTAGAACCTCTTACTTGTTTTTTTTATCAANTCGGTTTCCTATATAGGCTACATGGTTTAGATATATTTAA  
TTTTTCGAATACCTCGGTACAAATTTTCAACAGTTGTTATAAAAGTAAGGATATGCATTACATAAGGTGAA  
GTGGGCAGACACTTCCACAATTTTGT CATAAAAATATATTCATGAAAACTCTTAAGGCTTTTAATATAAAA  
TATTCCTTACTTTACTTCTTTGCAAATATTATTTACACAACATCTGAATAACCATTTTTTAATTACTTATTTTT  
ATCGCACAGTAGACTTTACTTTTTTAAATACTAAAATCTTATAATTTATGGAGTCAACTGTTTCAGACATC  
ACATACTATCCAGATAAATCATCGTCATTTATAAATTGTACATATTTTTCTCGCAAACCAATGGCACCGTT  
AGATGATGTTAGAAAAATTACTGTGCCAATTACTAAAAGTCAGAAACAATGTAGACGGCACTTTTACATA  
TTTTGTAAAACATTGCAAACAAAATTTGCACGCCACATAGAGTTTAAATATAGAGTGGAACCAAGTTAGAG  
AGATCAGCAGTTTATCAAAAAGACAAACAGCAAAGAATGAAATTGCTTGAGGGATGCTACTTACAATGAA  
GGA ACTTTTATAGTTTCACGTCAATTAAGGGAAA ACTCAAAAAGAGGGCTTTGGATTTTGTGTGCTCCAAT

GGATGTAAAGCCTACTTACCGAAGACAACAACCTCGGAATCAAATTA AAAAATTAATGTAGTAATATCCATA  
AAATATGCAACCGAGATATATTAACCTCTGCACGAAGTGCTGCAAATAATATTGCGAAATAAAAATAATGC  
CTGTCCTTAATGACGTCGCCATTACTAGGACAATATTGTATGATCACCTAATTATATTGTTTAAAAATTTA  
GAAGCAATGAAGCACACGGAAGTACAGCATGATATGATAACAGCAATTATGCGTTATCTAAGTCGCCGTT  
TGATAGTAATAAAATACGTTATTTCCCCTAAATATTATGATTTCGGTTAAGTCTGGAATTCGTTATGTTGCTG  
AGTTTGATTATGATAATATTCGTTTTATGAAGCCTACTGCAGCGACAACCTCTAACATGCTTGGTAAAAATA  
GTACATGTGCGAGAATATTA AAAAGCACAGATCATAAAATATTGCGACGATAGCATAAAATATTTAAAAAA  
ATAAAAAGATTTTGTTCAGGATCTACCTGCTAAAGCTTTGAATGAGCTAAACTAGAAATTCAACATATCATC  
ATTAACCTCGTTATATCAGAGCAGAGGTAGCGAACTTGAGAGTCTTACTCTTAAGAGCTACAGAACTGCT  
CATGCAATTGGGGCTATCGACGATAGAGCTAATTCTGACCTGTATGAAGGCACCTCAGCCAAAATGAAAA  
ACATCACCAGGGTGATTATTCGTGCCAAAAAAACCGAACATTTCCAGTTCTTTTTACACCATGCGATCGGT  
ATTGCATAGCCAATATACTCGAATATGGCAAACGCACAATAAATAAACCAGCTACTACACTAAAGATATA  
TTTTAGTGTGCCAAGCCCGTGGCCACTAAGAAAAGAAAATATTCGTGAGTGTCTATCCTAGAGAAATTC  
GCAAATGAATGTGGTACACGTTGCCCTGAGTCCCTTTCAGGCACAGACCTGCGAAAGCAATTGACCACAC  
ATACCGCTTTGTTCAACGTTAAGGACATTCAAATTGATTATTTGGCGAGCTTAATGGGTGATCATAAAGAT  
ATTCATAAAAATTACTATCGTGTGTGCTGCCTCTGTAGCGGGGGTGACCCAAGTTTCTCAATTACTTATGTC  
AACAAATGAACATGGAAGAGGAAAATGCTGAAATTGCAGATGCTAATCTCGAGAGTGAGTTAATTTATTTA  
GCCCCGTCTGTTGCGAAGAAAATTTTAATAATCGCTGCAAGTTTTGGACCTGGAAGTGCATATTCGGAATA  
CTTCAATAGAAGTTTTTCAAGTATCGGAACTTCGATACAGTAGAAGATACATTCAGTATTTAAGAAATTAG  
TAATGGTTTTTGGCGACCTATCCATATTTAAAAATATTTTGCTGGCGGGACCTCGGCCCGAGTTTTTTTTTAA  
ATTAATAGATTA AAAACAATCTAATTTAATACTTATAATTGCTTATTTTTATTTAAAGCAAAAATATTAATAAA  
ATATTTTTCAACTGTTTATTTAAACGAGCCCGAACCTCGACCACGCCAACATAAATATTTAAAAACATGCG  
CATTCGGACGGTATCAGACGAAGCAGCGCTGGTTATCGCAGGGATGATCCGCACAGCAGCAAGGATGC  
AAAGCATGGAACGATGGCAAGCACGTTGGGATCGCTCATCTAAAGGACGCTGGACACATAGGCTTATCCC  
AAACTTGGAAGCCTGGATAAGCCGCAAGTATGGTAATACTAATTTTTACTTAACGCAGCCTATTTGGCCAC  
GGATGCTTCAGAAGCTACTTGAAGCGATTTCGGCCACGATAACACAGACGAGTGTTCTTGGTGCGGCAGTG  
AAATCGCAGAGGACGCCAACACACCATCTTTGAATGTGGAAGGTTCTCAGTGAACAGGCAGGGCCTGGA  
GGACAGCTTGAGGAGACCTATCACGGTGGACAACCTTGGTCAGGAACAAGTTGAAGACCGCACAAAAATG  
GGAAGCTACCTACACTTTTGCAGCAGAAGTGATGCTGGAAGTTCAGGAGAGTTGAGCGCAATAGATGGAG  
AGCGGAGGAAGTTTAGGTGGCAACAACATGCCTGTGAAGCAATGCTTTGCGGCCGTTCCGCAGGCAATCC  
ACGCCACCTAATCATCACGTACCCCCCTCCTCCTCTATGTAATCTTGCTTCCCAAACAAAAATTGAAACAT  
GCCGCTTACCTTCGTTGATATATCAGCTGTTTATGTTTACGGTACTTTACCATTTTTCAAACATCGATAGAA  
ATCTCGATAAATCATCGTAAAAAACTCAATATGTTCCGCGCGAATTTACACATTTCTCAAAAATGTGGCCT  
TTTTGAATGATGTGTGAAATGTGTTTTCTTATCTGGAAACGCACAGGGCGCATTGTAGGGACCAACTGGC  
ACAAAAATTTATCATTTTCATCCCATTAACACAGCACCCGTTACAGTCAAAAAAGTCACCGAAATATTATG  
CATGCATCCCATCGTAGTCGCTATTTGCTTTCGCACGACGCTGCATGATTTGCTATCTCAGCGTCGGTGC  
GTTTCTTCACTCGCACTTTCGTGAGAATGAAGGAATGCTCGATAGATCAGGCCACATCACCGTTATAATTT  
AGATGTGGTGAATAATAATTGTGTTTGTATTTGTGTTTTTGTGCTGAAATTGAAGAAAAGTAGAAGGTCCGAT  
TGCCACGCTTCGTTCTTTTTAATTCGACAGTGGAACAAGCAAGTCACATATTTTGAGCGCGCATAAATCAT  
AGTAATTAACGGTGCAGTGGCTGTACACCGCTTCGGATTTTTAAGGGCATATCGAGCCCAACTCTTTTTAA  
AAGTCCCCAGTGCTCATAACAGTTCGCGTTCAGCAGATGTTATTCGCTTTTAATTAATCAAGCGCGTAATTC  
TGAATAAACCCCTTTTTTTAGTGGATAAAATCTTACTTAGCTACCGGCCAGCCATTGCGCAACGACGCGTT  
CGTGTATTCATATATATATACACATATAAATTCACCGTGGCTGGTCGGTCGTAGCCAATTTGTGAGTTGCA  
ACGGCTCTAAGGGAGTGGA AAAATATCAAAAGGGCCACGGATTTCTTAAGGATCACTACAGATTAACACTG  
CGGCGCCACCGGCACATAGCGGCTGAGTCTATACCCCGCGACCGCGTGTTTAGCCATTGATAACCAAGCT  
TTGCTGATCTACTTCTACTTTGCCGCCCTTTTTGATCAACGGAGTGTCTTCAACAAGGAATCGGACCGCTT  
AAGTGTGCGCAGATCGAGATCGAATATATGTGCTGGGCGATTGGTTGGAATTTTTGCGTACACGCTTTGCA  
GCAGAAGTGATGCTGGAAGTTCAGGAGAGTTGAGTGCAATAGATGGAGAGCGGAGGAAGTTTAGGTGGCA  
ACAACATGCCTATGAAGCAATGCTTTGCGGCCGTTCCGCAAGCAANCCACGCCACCTAATCATCACGTAC  
TATCTACATCCTAAGCATAAATTATTTATTATTTATATATTTATGTGCAAATAAACAGAAATACAAAAAAA  
ACACACACACACACAATGGAAACATAACACCCCTTCCACCCCTCCCCACCACCCCTTAATCCTTAACACC  
CCCCGCCACCCCTTTACCTTGCTTAACAACACTTGACCCTGATAATAAATGTAAACAAACATACTGTGCCA  
GAACATACAGTCCCCACCACGGTGACATCACTTCCTGTGCCAGAACATACAGTTCCTATCTACTATCCTAT  
GTAGACATAAGAATATAATAAAAACGTGTTTCATCGACTTGGGAAATTCCAATTACTGCCCGATCAGTTTC

GAAATCATTTTCAAGAAAAGGCCAGGTTGTGTTTTTTTTGTTTGTGTTGTACATACAAACATAGCCATGATAA  
TTGTATAAGGCCATTAGAATCGAATAAATTCACAGCATTAAATTTGTAGGATTACTCAACTGAATAAGTTTC  
TGTGCTTCGAAATTTTTTAAAAAAAAGTGACATTTTTTGACCCAATAAAAATGTATATATTCCTTATCCGCAT  
GGACATAGGAGTCCGTATTGTATTAATATTTTAAGCGTACGCAGTACTATGTTCAAGTTTATATTATATCT  
ATTCTAAAACCTCTACAAGATTAAAATATATTCATAGATATCGATATTGATAAAAATATTTTTTTTTTATACCCT  
GAACCCATTAAAAATGGGTATAAGGGTATATTGTATTTGTGCAAAAATCCAAATGTATGTAACAGGCAGAA  
GGAAGCATCTCCGACCCCATAAAGTATATATATTCTTGATCAGCACCAATAGCCGAGTCGATCTAGCCAT  
GTCCGTCTGTCTGTCCGTCCGTCCGTCCGTATGTATGAGCNCAAGGATCTCAGAACCTATAAGAGCTAGAG  
ACTTGAAATTTTAGATGTAGGTGCTCCTAGTTCCTCGCGCAGATCGAGTTTGTTCGATAATCGATAACTT  
ACTCCGTTTCCAAGCAATCGATAAAAATCGATATCGACATCCTGTTTTTTTTTAGCAAATTGGGTAAATAATA  
AGAGCTAGAGCCACCAACATGATATGTTGCTTCTAGAATATTATAGATATTTCAAGTATCTTTCATTTCA  
TACCTATCGCCACCTCCCCGCTACCAACCCAGAGCTATAAATCAAGTTAATAACCCAACTTTTATTGCCAA  
CCAATTTAAACCACAATTTAAATGCAATTGACTTTTTTCAGAATACACAAATATTCTATGGTACAATAAGAT  
ATACTGTAGAAAATTTCATAAAGATCGGTTAAGAAAAACCAAAGTTATATGCAACTGCGCAATTGAATGG  
GGCAGCAGCTTTAAGAATTTCTGTATACATGTACACACACACATTTCATGCGCGTCTGCTTCGCATTCTAAC  
AGCATGGTAATTGCCATCTTTTTTTTTGTAAATGTTATTTTAGTTCCTTTTTTTATCATAAGTACTTAATTGTTG  
GTGTGGCTGCTGAGTAGAGGCATAGCAGGTGGTGCGGTCTGTGCGGAGTTCGAGCCCTACCGGGGAAAGT  
ATTATTNTTCGAGCCCTATCAAGGGAGCTTTTACTTTTATTAATTTATTTGGTGTGGAATAAGAGGGTTCA  
GGGTATCCCCTAGTCGGGAGCTCCCGACTAGAACCTCTTACTTGTTTTTTTTTTTCGCTGGTGTGGCTGTTG  
AGTAGAGTCGACAGTAAGTAATGCGGTCAGNTGGAAATTCGAGCCCTGCCAAGGGAACTTTTTTTTATTA  
ATTTATTTGGTGTGGAATAAGAGGGTTCAGGGTATTCCTAGTCGGGAGCTTTCGACTAGAACCTCTTAC  
TTGTTTTAAATTTAAATCTTGTCCAGATCATTGTGCTGGCTCATATACTTCTTTTTTAAGCATTTTTTTATGCAA  
CTTGTATAGTTTATAAAAAACAATCGGCGCACATTATAACAACAATTATTATCAACAGTGTGTTTACTAGTT  
GTAAGTCCATGTTACTTGACTCTACTTTATTAATGACATAGGCAGTGGAGTCCACTGTCTTTAAGTCTAAA  
ATGGGACCATTTTGGGTTCGTATGTAATTAAATTATAATTATAACTATTAGGCAAATTTTTACCAAATTTG  
CTTATTGAATTGCTTTGCATTTACGCTTACAGTTTTCTCGCCAATATGTAGGTTTGGTTTCGTATTGCTTTAC

>Ref\_Slicemaster

ACGGAAAGTCAAAAAACGAGCATACGGAAAGTCAAAAAACGGAAAGTCAAAAAAAAGTCAAAAAA  
TCAAAAATTGAAAATTACTAAAGTTGGTGGCAATGTGTCCGCGAGAGTGCAGCGGCGCACGTGAAAAATCA  
AAAATTGTGAAACCACATACATTTTGTCTGAAAACCTATCAAATAGAAAATTGCACATTTTTCGGTGCAGCA  
AAGGGCAAAGGGCACTAGGCCAGCCGTATTTGTGCTAGTGCTGTAAATAAAAACTTATCGATAGGACGA  
TATAAACACATGTAATAACAGAAAGAATCGATATCACATGATCTATTAAATAATAGTGAGACCAGACTT  
CTTACTTTCTCGTATGCCTCTCAAACCTGTTTACATGGCACAGCGTCAACATAACAATAAACAAATCACGAC  
ACCGATTGATGAGGAAGACTCGGACATTGAAATTCAGCTAATCAAAGCTGGCCGCGGTCCATTCTCAGCT  
AATAATGCGTTGAAAATCCCTGCAATGCAAATTGATGCCAATCAAATAACAATGAGCAGCTAAATCATG  
CGCCAGCACCTCGCGTGCCGCAGGCTTAGCTGCTGCTAATAAAGTTGCCCCCGACGCAGCCGCAACTAC  
TAAGAAGTCAACTCTTGCTGACTTGCTGACCAAAATTGCTAGTGATAAAAAACTCAAGGGTAAGGTTTCT  
AAACGCCATGCAATTCCAGATAACAGCGCCAAGCGAATCAAGATGCTAGAAGCCGATATAAGCAAGGCT  
GCTGCTAATGATGCCGCCCTGAGTGAAGAATTAGAAAATCTCCTTGGAACGGCCAACAGCATGAACTCT  
GGGTTACAGACCATCCTGATGAAGACATGCAGATTGACGCTGTTGATCCAGTAACCGATGCGCCTGCCCC  
AAACATTACTAATGTAAATGTAAACAACAACACTACGGTAAATCATGCAAATTCTGCTGGTGTGACGTA  
AGGGCCCCAGTACCCAAGGTACAAAAAATCAAACCAGCGCCACTTTTCATACCTTTTGTTCGGAAATAA  
TGCCATTAATTGAAGGCATTAATGATGTCATTGGTGAGGGCACCTATGCAACTAAGCCTTCTGCTGGTCAG  
GGCCTGCAAGTGCTTTGCAACGATGTAGATTCTTACCGAAAGCTAGTACAGTACTTCCAAGATAACTCCAT  
TGCTTCACATACATACCAACTGAAGCACGAACGTGGCTTCAAATATCATGCGCCATTTACATCGCTCTA  
CTCCGGCGGATTGGATTCCGACTAAATTGTCTGACCTGGGGCACAAAGCCCGATTTCGTTAGTGTTATTA  
AAACGATTCACTAGGGAGCCAATGGACATGTTTGAGATAGAATTGGAGCCCAAGGCAAATAACAGCGAA  
ATTTTAAGGCTCAACATGCTCGGCGGCCAAAAGGTCAAAGTTGAGCTACCACTACGAACCTACCGATATAG  
TGCAATGTCATCGCTGCCAACAATTTGGGCATACGAAGAATTATTGCAGGCGTGCATTTCGTATGCGTCAA  
ATGTAGCGGGAAACATCCTTCTACTGAGTGCAGCATAACGGCTAACGATCGGCCAAAATGCGCTAATTGT  
GAAGGCCACATGCGGCTAGCTACAAAGGGTGTCAGTCCTTCAAGGATGCCTGCAAGCAAAAAGAGTCTG  
AGAGCGTGGTCAAAGCCAATGTCCTACTTGCTCAGCTAGGACAGCCAACATTGCCAGTTATGCGTAGTCG  
CCAAAGAAAACGGTCACAACAGCGACAGCAGCGCCGCGAAATCGGTACAGCAGCAAGATCAACGTCA  
ACGCTCAAAGACGCGCCAACGGGTACATATTGATCAGCAGCAACAACAACAACAACAACAACTGTGAA

CTTTGCTGCAAATTCCTTATGCGTCGGCCTTGCGTTCTGGCTTGCCGGATATGCATTTCGCAAAAAGCAGCAA  
CAACAGAAGCTAAAGCGGCAGACAGCCCAACAGCAGCATCGCCAATCACGCCCTAAGCAACAACAACCTC  
CCGACTCGCAGGCAAATGGATGGTCAACAAACGCTGGCACGCCAGCAAAATAGAAGCCGCAGCTGCAGT  
ACGCGACGGAGCGCTACTAACTTAAACACAAACTGCGACATTGGTCAAAAACCTGGACACTCTTATCACTT  
TAATGACTGAAGATCGTTTGAGAGCCAACTCCAACGTTGAAAACAAGCTAGATAAACTTCTGAACTTACT  
TACCAACTTGACATCTTGCTAATGGCAAAGGAGCAAGTTACTAGCAAACAAAATGTTTAACAACCATAT  
ACCTAGCACAGTCCGTCAAGATAGCAGTAATCGCAGATCAAACGGGCTCAAATCGCCTCATGGAATGCA  
TGTGGGTTGCGAAACAAAATGTTAGAAATGGAGGCATTCTATCAGAACAAATATTGACATCATGATCA  
TAGTTGAAATTCGCCTGCGCGGGACAGACGACATCAATATCGACGGCTTCTATGCATATCACGCCCTTAC  
CCATTCATACACAACGAGGAGGCGCAGCTATACTGGTCAAGCACAGTCTACAGCATATCGCTCTTCCTCTC  
ACTAGCGCTATATCAATGCAGTGCAGCGGCAACAAAATCACTCTGCTTAATGGGTCTGCTATTAACATCGC  
AGCAGTATATTGCCCCGCCCTGATTGAACTCGAAGATGAGCTGTTTGCTGCTCTTCGTGAGCTCGGCAACA  
AGTTCATCATTGCAGGAGATTGGAATGCGAAAAGTCATTGGTGGGGCAATGCTAGATCCTGCAGACGAGG  
TGGTAATCTTCTCAGATATGTACAGCAAAATAATTGTGAGATTCTTGCAACTGGGTCCTCAACACACTTCC  
CGTACAATGCTAGACAATCGCCGTCAGCAATAGACCTTTGCTGTTCTATAAGGGACTGCAGAGAGAACTC  
CTACAGATAAGCGCTACACACGACCTTGGCTCTGATCATCTCCCTCTATTAATCGAACTTCTTGAAACCCC  
GGCATTTAACAAGTCAAGGTGCTATCTACTACCACTTAACGCGAGTGTTGCTCGCTTTCAAGCCTGGCTAA  
ACCAGCATGTACTGCTGGATACAGAAATCCACTCAGCTGCAGATATTGAGGATGCCACAGATATTCTTGA  
GCGTAATATTCGAGCAGCAGCACAAATATGCAACAAACTCTCACGCAATTCAATACCACCAACGAGCGCAA  
AACCAGTGCCCACTCAGCAGGTCTCTGGAATTAATGATCAAGGCCAAAAGACTGCTCAAACGTCATTTTC  
TTGTGAACCGACACCCATTAGCCAAAAGAATTCATGACAGTCTCGCAAACCAGGTCAGAAGAACTTTAAA  
AGAAGCCAAGGAGAGACGTCTGAATAGCTTGCTTGAATCTATAGATCCTAGTGACCGCTACAACCTTTCAA  
AAGCTGTGGCGACTAACAAACGGCATTAAACGGCAGCCTGCGCCAAATGTGCCAGTTAAAAAGTTTCATTC  
AACCTGGCAGCAGCGCAGAAGACAGCAACGCGTGGTGTAAACTACGCAAGAAAAAGCGGAAGCGTTTG  
CTCAAATTTAGAAGAGAGATTCAAGCCTATTATTACTGCCTCAACAGCTGACAGAGAGCACATCTCGAG  
TCAACTACAGCTACCTCCAACGCACGCAGAGATGCATTTTCGGCCAATAACAGATGCTGAGGTAATAGCA  
GAAATCAAGGCGCTTAAACGTAAAAAGTCTCCTGGGCTTGATACAATTGACAACCGGACTATAAAGGCCT  
TGCCGTTAGTTGCTCTCCAGTACCTTAGCCTCATTATAATAGCATACTGCGCTTGGGCTACTTTCTAGCA  
AATGGAAGTGTGCTGTGGTCATTATGATTCCCTAAGCCTGGCAAGCCGCAAGAGCAACTAAATTCATACAG  
ACCAATAAGTCTGCTATCAGGTCTTTCAAAAATATTTCGAGCACTTGCTGCTTAGACGAATGTACGAATCAG  
ATGGTTTTTATACATGCTATTCCAAAGCATCAATTTGGCTTTCGCAGCGAACACGGAGCAGACCAGCAGATT  
GGCCGAGTCACGCAATTTATACTCGAAGCATATGAAAGGAACCAGTACTGTGCTGCTACATATATGGATA  
TCCAAGAGGCCTTTGATCGAGTATGGCATGATGGGCTACGATATAAGCTACGGATGATTCTGCCGTATGCT  
ACATACAATGTAGTTAGCCACTACCTCGCCGAGAGAACATTCATGGTAGAATGCAGCGGGGGAATCCGAT  
CTAGCACTAAGCGAATTGCGGCTGGAGTGCCGCAAGGAAGTGTACTTGGTCCTGTGCTTTATACGCTATAT  
ACAGCTGACATGCCCATCCCGGGACCAATAAGTCCAACAACCTGGATATGTGAGGCATATGTACCGCAAAG  
AAACATTGCTTGCAACATATGCAGACGATACCGTCATACTAACTGTAGGCAGAACGCAGACAGATGCAGT  
TAATCGAATGAACGAGTATCTCGAAGTCTTGTCTGCTTGGGCCACTAAATGGTGTATAACAATAAACGCA  
ACCAAGACGGTGCACGTCATGCACACTTTGCGCAGGCTTCAAATGCAGACAGATGCCCAAACCTGCACACA  
TAGGCGGGCAAGCGCTACTCAACCAAACGGTGCACACTTACCTCGGTGTAAATTTGGATACACAGCTGCA  
ATTTAATAGACACATATCTGCTGTAATTAACAAATTGAGAACGAGGTTTAAAAAAATGCAATGGCTGATT  
GATAGCACAAGCAAACCTACCCCTCAAAACAAAAGTTATAATTTATAAACAACCTCATCGCGCCAATTTGGC  
AATATACATTGCCCGTCTGGGGACCGCTTGCAAGTCAAACACAAATCGATCGCATAACAGACTATGCAAAA  
TAAATTTCTCAGATCGATCGCAGGTGCACCATGGTACGTGCGCAATAGCACCATAAGCAATGATCTGGAA  
GTTGCAAGTGTAGATGACGTCTACAATGAGGCATGTAGCAAATATGTGCAGCGCCTTTTGAATCACAGCA  
ACTGCCTGGCTAAAGACCTAGCAATCAACCCATATGTACCGCAGCGGCTAACTAGGGAGAGGTACAGCCG  
AATGCTACAAAGACATATGCCCCATGTGCAGCGACAGCAAGAGCAGCAGCTGCTAGAAGCTCAACAACG  
AATGGCAGAAATTGAGGCACACCGACCTATACATGGAAGATCTGTTGAACGGCCACTAACTGCTCTGCAG  
CAAAGCATTTTGGAGCGCCTTAGTAGGCAAAGAAGCTATCAACAACAGCGCGCCGAACAACGAGAAGCA  
GAACGCGCACAGCGGAGAATAGAGAGGCAACAAAGAGAAGAGCAACATAGACAGGAAATGCTTCGAGA  
ACATCAAGAGTCGATACAAATATATGCTCAAATATATGCGCAAAGAGAGCAGGCACTACAGCGGCTAGA  
AGAGCGACTACAAGCAAGACGTCTGGCAAGGCAAGCGTACTTCGCTATGCCACCGGCCCAACAAGAAGC  
CGTGCCGATAACGAGTATTTTTATATTTCCAGCGAACTCTGCAGCAGCCAACCGCAGCGCAATGGGCATT  
CTCCAACGACGAGCACCCACACAAACACAACAACAGCACAGGCAACCAATACGGCGTGGCTATCAGCT



TGTCTGTGAGGCACACAATTGACGGCATAACCAGATGTGCAAAATGGCGAAGGATTTACTGATCTCGTTAT  
CATGGTTACGTTTAGGTGCATTCAGCGCTCAAATCAGACAACCTCGACCAGAGCAGCTTCCACGTCAATGG  
CGTCTGATCGAACGGCAACTGCAACAAAGATTGAGAATCAGAAGATATGCTGCAAGAAGCTATTATCTGA  
TGCATACTACCAGACGACAGCGGCTAGCACGTTTGCAGCAATTCAGACTCCAATATCCAGCACAGTGGCG  
ATCAATCTGGCGACGGCTGCTCCTGCGAACTTTGGACTCGAATTTGTGGTACCTAGATCAGCGCTGGTCAA  
CATGGCGACTCCAGTTAATCAGGCTGCAAAATATATTCCGCTGGTTGACCAACAGACGACATGGTGGTAG  
CAGCCGCTACTTATCTGACCGGTAACAACGGCTGAGATGCAAGGATTGCATGTTTTATAATCCACTAATTC  
AAACAAAGATCAACTACTCACACTTCGAAGCAGTCGTTATGATCAAATTTGGCTATATCGTTTACGCGCTTC  
TGAAGAGTGCAAATATGCACATCGTCCACCTTCTCCAACAAATGCAGCACGAAGGAAACCTGAAAAGAA  
GACCATGCAGCATAAATATAAGATTATTAATAATTAAATTCAAATTTAACTTACCTTTGAAAGACACAATA  
GCTAAAAGCTGTGCCTGTAAACAGCGGAAACCTTGTTTACCTTTTTTAATGTTAAATTGTCCTAGTGATGG  
GACTTGCTAATATGTGCCTGTAAATAACATAATGTTAAATTGTAAGTTAACAGAAATGTTAAATGTAGG  
CGCTAAAAAATTCAATTAATAATATGTCCAAATATTAATGTTGAATAAAGAATACCAACACTAGCTGCACC  
CCCCCTCCTGCTATGCAGGTGCGGATTGGTGCAATTTGAATGTTGGTCTAGTGCGTGTGTCAACGAGCATA  
CGGAAAGTCAAAATCAAAATTTGTGAAACCACATACATTTTGTCTGAAAACCTATCAAATAGAAAATTGCA  
CATTTTTCGGTGCAGCAAAGGGCAAAGGGCACTAGGCCAGCCGTATTTGTGCTAGTGCTGTAAATAAAA  
ACTTATCGATAGGACGATATAAAACACATGTAATAACAGAAAGAATCGATATCACATGATCTATTAAATA  
ATAGTGAGA

>160\_rnd-1\_family-217\_\_LTR\_\_Gypsy

TATATATATATATATATATATATATATATATATATATATATAGTGACATATCCATAGTCGCACCCACCCT  
TTAACATAACTTAGCACATAAGCATAAGCACAAANTATAAACATTTCTAATATTGTAAACAAAGAGCCTGG  
TGATAACATCGACATTGGTCAAGATCAAACCTGTCCCCCTTTGGTAGACATAAACAATTCACCCTAAATATC  
ACGCCACTGTCAATGTTCCCATCAGAGCACTATCCCACGCATAATTGCTGACGCAGCTCAAACCTCACTCA  
ATTTTGACTCAAACCTCTCTCAAAGCGAAGTTTGCTAAGCGACCGCAACAGTTAGATAAATCAGTTCATATT  
CGGGAAGCAAATCTGAATGTACTCAACAAAAGTAGCCGTAAAGTGAAAATAATAAATTGAAATATATTTT  
TTTATAGTAACCTAACGTGTAAACCTTAATTGGCGCAGCCGGTAGGATACGTCGGGAAAAAGTAAAGATC  
GCTAAAGGATAATTAATTCCCAGATCTAACGCACAATCGCGACCGAAAGTGTTGTCGGAGTGTAATAAAC  
ATTTTCTCGAATACGTATCCGCACAAGAACCTTCGGGTCACTAGTAGCCTAATAATATTGACCCTTTGGGC  
AATAAAGCTACTACAGTTAATAACGACTGGCTTTGCATATCGTTTGATCCCTGCAATACGTTATTACTGGG  
TCTTTTTAAGACACACACACAAAAAACAATTTAAACAATAATCCATCACAACTTTAACCT  
AAAATAAAAGTGCAAAATCAAAGAACAATAAAGTTCAAACCTACAACTCAAACCTATTCAAAAAAAG  
TGTATTACACCAAGATGACNATGGAATTATCAGAACAACACCTCAACCAGGCCCTTTCACAACTTAGACA  
GGTGCCAAGCTTTGACGGATCAACGGATCAACTAAACGCCTTCATTAAGGATAGATTACATCCTACAC  
CTGTATCCAACCCGAGATGTTAGACAACACAGCATCTTATACGGAGCCATCGAATTGCAAGTCACAGGAG  
ATGCTCAGAGAATATCACAAAGGACAGCAGCCAACACTTGGCAGGAGCTGAGAAACGCATTGATTGAAG  
AATACAAAGTGCGAGACACCATTTGAAGAACTCCTTCGACGCTTATACAACACGAATTACCAAGGAAACGT  
CCGTAAGTTCATCGAGGAGCTCGAGAATAAATCTTTTGTATATTAAATAAGTTAGCACTAGAAAATATAC  
CTAGCAATACGACCCTTTATACAAATGCTATGAATAACACAATCAAAGATGTTATTACAAAAAATTACC  
AGATAGGCTTTTCATGATGTTAGCCAGACACGACATTACGTCGACACAAAACTAAAGCAAGTAGCTCAA  
AGAGAGGGATTATATGAAAATAGCGTTACTGAAAAACCTAAAAATAATAATGTTTCAGGGAAATCNAAAT  
AACAATCGTAGGAACATGGGAAATTATCAGCAAAATGCTAACCCAACCACCATTTCAAGTGGTTATTCCA  
ACACGAATCAGAGTTATCACGCACAAAATAAACAGCACAAATAAGTCCGAAGACAATCAGAAAGCTCACC  
ACGAGTTCCAACAGAAATTAAGTCAAGGTAGATACCAAAATCCCTTAACTACCAAAATCAGTCCCATT  
ACGCTTGAATGCGCCAAACCCTCCGACTAAACGTCAAAGAGATAGTAACAGTGGGCAGATGAAAATGGA  
TACATCCGAAAATTTTCATCAGCAAGCCTCGGAACAAACAGAAGAAATCCATTTCATAAAATTGATTATGA  
ATGACGAAGTTCTAAAATGTGTCATCGACACAGGTTCAACCATAAATCTAATGAAAACAAACCGCTTAAA  
TTTTCCAGTTTACAACGAAACATTAAAGGTTACACCATAAATGGTGTATTGAATTAACAAAGTATAC  
GATTAGGAGCAAGCAAAATTTGTCCGAGCAAACAAAAATTCTATATTCACGACTTCTCAGAGCATTATGA  
TGTTCTGATTGGGAGAGAATACCTTGAGGCATGTCAAGCAAAAATAGACTATGCACAAGGATCCGTAACC  
TTAGGAGAATTTAACTTTTGTTTTAGATATAACGACGAAGAGGTGCAAGAGGACATGACCGCACAAAGAGT  
GCCTTGATCCACCCTCAACAGAGGACAGACCATTTAACTTCGCTATTAATAACGAATTAATAGAAAACAA  
TGAGTTTAGGCTAGAGCACCTAACTCAGAAGAAAAAGAAAAAATNAAAAAAGTTTTACATGAATTTTCGT  
GATATCCAGTACCATGAAGGTGACAATTTGACTTTCCTAGTACAATTAACACAAAAATTCTAACAAAAAC  
ATGAGGACCCAATTTACAAGCGTCCATACAAATATCCTCAAATATACGATGAGGAAGTAAATAACAAAT

AAGCGATATGATAAAACAAAATATCATACGTAAATCCAAATCCCCCTTACTGCTCACCAGTAATAATCGTT  
CCAAAGAAAAACGATGCATCTGGAAAGCAAAAGTTCCGGTTAGTCATAGATTACCGCAATCTCAATGAAC  
TAACTATTAATGATAAATACCCTATCCCGATCATGGATGAAATATTAGACAAACTTGGAAAATGTCAATA  
TTTCACAACCATTGATCTAGCCAAAGGCTTCCACCAAATCCAAATGGATCCTGGTTCAATACCCAAGACCG  
CATTTTCGACTAAACATGGCCATTACGAGTACACTCGCATGCCATTTGGTCTTAAGAATGCACCTGCAACG  
TTCCAACGTTGTATGAACAATCTCTTAGAAGATTTAATTTTTTAAGGATTGTCTGGTCTACTTAGACGACATT  
ATTATTTTTTCCACTTCATTGGAGGAACACATTTTGTCTGCTACAAAAGGTATTTAAGAAGCTTAGAGAAGC  
TAACTTAAAACACTACAGTTGGATAAATGCGAGTTTATGAGAAAAGAACTGAATTTCTCGGTACATCATC  
ACAACCTGAGGGTATAAAACCAAATCCCAACAAGATACAAGCAATTGTCAAATTCCCAATTCCAAAAACCC  
CAAAAGAAATTAAATCATTCTAGGATTATGTGGTTTCTATAGGAAATTTATACCAAATTTTCGCTAATATA  
GTAAAACCATTAACACTTAAATTAAGGAGCAAAAATCAATATAAGACAGAGACTACGAACCTA  
GCGTTTGAAAAGCTAAAAGTACTCATAACATCCGACCCAATTTTAATATACCCTAACTTCGAAAAACCAT  
TTCATTAACACTACAGACGCGAGTAATATGGCAATAGGGGCGCTCTTCGCAAGAGCATAAGCCTATATGC  
TATGCAAGTAGAACTCTCAACGAGCATGAGTTAAATTATTCAACGATTGAAAAAGAATTATTAGCAATCG  
TTTGGGCCACTAAATACTTTAGGTCCTATCTCTTTGGTTCGACAATTTCAAATCCTTAGTGATCACAGACCA  
CTCGTCTGGTTAAATAATATGAAAGAACCTAACATGAAATTACAAAGGTGGAAGATCAAGCTAAATGAGT  
TTGATTTCCAAATTAAATACGTCCCAGGAAAAGAAAATTATGTGGCAGATGCTCTGTCCAGAATTCAATTA  
AACGAAAACCTTCTTAGGCGAAGATACAATTAGCACAAGAGCAACAATACATAGTGCTCAAGAAGACAAC  
AGTAACCATTTACAAATCACAGAAAGACCACTTAATTATTATAATCGACAAATAGAATTTGAAAAAGGAA  
CCGAGAACGAAACAAAAGTTACGAATTACTTTCACAAAACCAACATAAAAATTACGTACAAAGACATGA  
CTAACGCGCATGCCAAAGAATTAATAAAAGAATACTTATGCACAAAGAAAAGTGTGCTATACTTCCACAA  
CGAAGCAGATTTTCCAATTTTCAAGAAGCCTACTTAGAAATAATAAGTCCGAATAATTCAACAAAGGCA  
ATGAAAACCTAGTACAAAATTAATAGACCTTCAAACATACGCAGAATTCAAAGAATTAATATTAAGGAA  
ACAAAGAATTATTACATCCAGGAATTGAAAAAACTATCAATTGGTTCAAAGAAACCCACTATTTCCAGAA  
TTATCAAAATTTAATTCAAATCTAATAAATGAATGTGAGATTTGCAACATCGCAAAAACAGAACACAGA  
GATACAAAATTAACCTTTCGAAATAACTCCGGAATCGCTAATATCCGAGAAAAATATGTAATGGATTTT  
ACATAGTAGGAGATAACAATTTTATCTTGCATTGATATCTATTCAAATTTGCATCATTAAATAGAAATA  
AAAAGTAGAGACTGGCTAGAAACCAAACGAGCTATATTACAAGTGTTCAACCAAATGGGTAAACCCATC  
GAAATAAAGGCAGACAAAGACTCAGCTTTTATGTGCACAGCTTTACAATTATGGCTAAAATCAGAAGCAG  
TAAATATTAATATAACCACTAGTAAAAATGGTATATCCGACGTAGAACGATTTTATAAGACAGTTAACGA  
AAAACCTAAGAATCATTAAACAGCGACTCAGACGTCGAAAATAAACTTACAAAATTTGAAACTATACTCTAC  
ACGTACAATCATAAAACAAAGCACAAAACGACTAACAGAACACCAGCGGACATATTCATATACGCAGGT  
ACACCAGAGTATGACACTCAAGCTAATAAAGAAAACTAATAAATAACCTCAACAAAAAACGAACAAAT  
TATGAAATTGACACTAGATACAAACACTCACCGTTAGTTAAATCAAAGACGACAACCCCGTTCAAGAAAA  
CAGGAGAACTAAGACAAATCGACGACAAACATTTTGAGGAACTAACAGAGGCAGGAAAATAACACATT  
ACAAAACCAAATTCAAAAAGAAAAAGAACTAATCAAAGCAAATATAACAATTACAGGTCAACAACAG  
ACAGCGATCAAAACATACAAGCACCAGCTTAAATTAATTATTATAATATTACTATCAATAACTGTAAACC  
ATATAAATGCACAGAGTATTGAAATTAATCCTATCAAAGCCCATAACGGATATCTCATATTTAAAACAGG  
AACCATAGACATTCCGACAGATTACGAATTCCTACTGTTTAAACGGTTAATATAACAAAAACCGAAGAACT  
TTTAACAATTTAATTGAACAAAGTAAAGAATTCAATAACCTTATACAAATCGAATACCTAGTAGAAAAAT  
TAAACAGAGAAATAAACGGCTTAAAAATAGCCAAACGCAGCAAAAGAGGTTTAGTTAACATAGTAGGAA  
CAGCATATAAATACTTATTTGGAACATTAGATCAAGAAGACAAAGCAGAAATTGAACAAAAAATAAGCA  
ACTTAGCAGAAAACAGCGTTTACGGTTAACGAATTAAATTACATAATAGAAGCTATAAACAAAGGAATAG  
AAATCATGAACGAACCTAGATCAAGAGAAACAAAAAGGAAAGAAATTAGATATCCTTATATTTAACTTACA  
ACACTTTACAGAATATATAGAAGACATTGAGATGGGAATGCAGCTCACAAGATTAGGAATTTTAAACCCA  
AAATTACTAAAACATGACTATTTGTTGCATGTTAATTCTGAGAAATTGTTGAATACAAAAACTTCCACTTG  
GTTTAAATCAGATACAAACGAAATACTGATAATATCCCATATTCCTCGAGAAATAATAAAAAGCCCGGTA  
TTCGAAATAATTCCATACCCGGATGAAAATAATAATTTTTGACAGAAATAGCTCATGAAAAATATTTTAC  
CCAAGATAAAAAAGTTTATAGCAGAGAAACAAAAAAATTAATTAATAATGAATGTTTAAACAGGAATTTTA  
AACCAAATAACATCAGAATGTAGTTATACTAAAATTTTGCAAAATTTTCAAATCAACTACGTAGAACCAA  
ATATAATTTTAACTTGGAATTTACCAAAAACTATATTAAACCATAATTGTATAAATAACGAAATAACAATA  
GAAGGAAACAATATAATAAAAATCTTTAATTGTTCACTGCAAATTAATGAAATTTCAATTTCAAACAATAT  
GTTAGATTATACTCAAAGCATTTACGTAAGCAATGATGTTATAAAATTAGAACCACTTTCGTTTGTACAAA  
CGAAACAAATTATAAATGCACATACAAAATTTAACAATGTATTCCAGATAATTACAATAACCATATTTGT

AATCATATTAATAAGTTTAAACACTGTATTTGACATATAAGTTCAAAAAGCATACCTAAGAAATTAATTATAA  
AATATAAAAAACCCAAAGTAGAAGAAACACCTACAATAATAGGAGATATACCAATTGTAAAAGAAGAAA  
ATGTTACACTATATCCAAACTTAAACACCTGAGGACAGGCACTTTTCTAATGGTTGGGGGAGTGACATATC  
CATAGTCGCACCCACCCTTTAACATAACTTAGCACATAAGCATAAGCACAATTATAAACATTTCTAATATT  
GTAAACAAAGAGCCTGGTGATAACATCGACATTGGTCAAGATCAAACCTGTCCCCCTTTGGTAGACATAAA  
CAATTCACCCTAAATATCACGCCACTGTCAATGTTCCCATCAGAGTACTATCCCACGCATAATTGCTGACG  
CAGCTCAAACCTTCACTCAATTTTGACTCAAACCTCTCTCAAAGCGAAGTTTGCTAAGCGACCGCAACAGTTA  
GATAAATCAGTTCATATTCGGGAAGCAAATCTGAATGTACTCAACAAAAGTAGCCGTTAAGTGAAAATAA  
TAAATTGAAATATATTTTTTTTATAGTAACCTAACGTGTAAAACCTTAATTATATATATATATATA  
>Ref\_Tv1  
AGTGACATATCCATAGTCGCACCCACCCTTTAACATAACTTAGCACATAAGCATAAGCACAATTATAAAC  
ATTTCTAATATTGTAAACAAAGAGCCTGGTGATAACATCGACATTGGTCAAGATCAAACCTGTCCCCCTTTG  
GTAGACATAAAACAATTCACCCTAAATATCACGCCACTGTGGTAGACATAAAACAATTCACCCTAAATATCA  
CGCCACTGTCAATGTTCCCATCAGAGTACTATCCCACGCATAATTGCTGACGCAGCTCAAACCTTCACTCAA  
TTTTGACTCAAACCTCTCTCAAAGCGAAGTTTGCTAAGCGACCGCAACAGTTAGATAAATCAGTTCATATTC  
GGGAAGCAAATCTGAATGTACTCAACAAAAGTAGCCGTTAAGTGAAAATAATAAATTGAAATATATTTTT  
TTATAGTAACCTAACGTGTAAAACCTTAATTGGCGCAGCCGGTAGGATACGTGCGGAAAAAATTAAAGATCG  
CTAAAGGATAATTAATTCCCAGATCTAACGCACAATCGCGACCGAAAGTGTTGTCGGAGTTGTAATAAAA  
ATTTTCCTCGAATACGTATCCGCACAAGAACCCTTCGGTCCCTAGTTAGCTTAATAATATTGACCCTTTGG  
GCAATAAAGCTACTACAGTTAATAACGACTGGCTTTGCATATCGTTTGATCCCTGCAATACGTTATTACTG  
AGTCTTTTTAAGACACACACACAAAAAACAATTTAACCAATAATCCATCACAAACCTTTAACCTAA  
AATAAAAGTGCAAAATCAAAGAACAATAAAGTTCAAACCTACAAACTCAAACCTATTCAAAAAAAGTG  
TATTACACCAAGATGACAATGGAATTATCAGAACAACACCTCAACCAGGCCCTTTCACAACCTTAGACAGG  
TGCCAAGCTTTGACGGATCAACGGATCAACTAAACGCCTTCATTAAAAGGATAGATTACATCCTACACCT  
GTATCCAACCCGAGATGTTAGACAACATAGCATCTTATACGGAGCCATCGAATTGCAAGTCACAGGAGAT  
GCTCAGAGAATATCACAAAGGACAGCAGCCAACACTTGGCAGGAGCTGAGAAACGCATTGATTGAAGAA  
TACAAAGTGACAGACACCATTTGAAGAACTCCTTCGACGCTTATACAACACGAATTACCAAGGAAACGTCC  
GTAAGTTCATCGAGGAGCTCGAGAATAAATCTTTTGTTATATTAAATAAGTTAGCACTAGAAAATATACCT  
AGCAATACAACCTTTTATACAAATGCTATGAATAACACAATCAAAGATGTTATTACAAAAAATTACCAG  
ATAGGCTTTTCATGATGTTAGCCAGACACGACATTACGTGACACAAAACTAAAGCAAGTAGCTCAAAG  
AGAGGGATTATATGAAAATAGTGTTACTGAAAAACCTAAAAATAATAATGTTTCAGGGAAATCCAAATAAC  
AATCGTAGGAACATGGGAAATTATCAGCAAAATGCTAACCCAACCACCATTTCAAGTGTTATTCCAACA  
CGAATCAGAGTTATCACGCACAAAATAAACAGCATAATAAGTCCGAAGACAATCAGAAAGCTCACCACG  
AGTTTCCAACAGAAATTAAGTCAAGGTAGATACCAAAATCCCTTAAACTACCAAAATCAGTCCCATTACG  
CTGAATGCACCAAACCCTCCCGACTAACGTCAAGAGATAGTAACAGTGGGCAAATTAGAATCTGGGATAA  
CATCGGGAAATTTTTATTTCAGCAAGCCTCGGGAACCAAAACAGGAACAAATCCATTCTATAAAAATTGGATT  
ATGGAATTGACGAAGTTCTTAAAATGTGTCATCGACACAGGTTCAACCATAAATCTAATGAAAACAAACC  
GCTTAAATTTTCCAGTTTACAACGAAACATTAAGGTTTCACACCATAAATGGTGTTATTGAATTAACAA  
AGTATACGCTTAGGAGCAAGCAAAATTTGTCCGAGCAACAAAAAATTCTATATTACGACTTCTCAGAGC  
ATTATGATGTTCTGATTGGGAGAGAATACCTTGAGGCATGTCAAGCAAAAATAGACTATGCACAAGGATC  
CGTAACCTTAGGAGAATTTAACTTTTGTTTTAGATATAACGACGAAGAGGTGCAAGAGGACATGACCGCA  
CAAGAGTGCCTTGATCCACCCTCAACAGAGGACAGACCATTTAACTTCGCTATTAATAATGAATTAATAG  
AAAACAATGAGTTTAGGCTAGAGCACCTAAACTCAGAAGAAAAAGAAAAAATAAAAAAAGTTTTACATG  
AATTTGTGATATCCAGTTACCATGAAGGTGACAATTTGACTTTCACTAGTTACAATTTAAACACCAAATTC  
CTAACCAAACATGAGGACCCCATTTACAAGCGTTCCCATACCAATATCCTCCAATTATCGAATGAAGAAG  
TTATTCCATTTAGCGATTTGATTAAACCAATTCCTAATGGTTTACCAGTAATAATTGTTCCAAAGAGAAAC  
GATGCATTTGGGAAGCCAAAGTTCCGGTTAGTCATAGATTACCGCCATTTCAATGAACCTAATTAATGA  
TAAATACCTATCCCGATCATGGATGAAATATTAGACAAACTTGGGAAATGTCAATATTTTACAACCATTG  
ATCTAGCCAAAGGCTTCCACCAAATCCAAATGGATCCTGGTTCAATACCCAAGACCGCATTTTCGACTAA  
ACATGGCCATTACGAGTACACTCGCATGCCATTTGGTCTTAAGAATGCACCTGCAACGTTCCAACGTTGTA  
TGAACAATCTCTTAGAAGATTTAATTTTTAAGGATTGTCTGGTCCACTTAGACGACATTATTATTTTTTCCA  
CTTCATTGGAGGAACACATTTTGTGCTACAAAAGGTATTTAAGAAGCTTAGAGAAGCTAACTTAAACT  
ACAGTTGGATAAATGCGAGTTTATGAGAAAAGAACTGAATTTCTCGGTCACATAATCACAACTGAGGGT  
ATAAAACCAAATCCCAACAAGATACAAGCAATTGTCAAATTCCTCAATTCCAAAAACCCCAAAAGAAATTA

AATCATTTCTAGGATTATGTGGTTTCTATAGGAAATTTATACCAAATTTTCGCTAATATAGTAAAACCATTA  
ACACTTAAATTA AAAAGGGAGCAAAATCAATATA AAAAGACAGAGACTACGAACTAGCGTTTGAAAAGCTA  
AAAGTACTCATAACATCCGACCCAATTTTAATATACCCTAACTTCGAAAAACCATTTTCATTA ACTACAGA  
CGCGAGTAATATGGCAATAGGGGCCGTCTTTTCGCAAGAGCATAAGCCTATATGCTATGCAAGTAGAACT  
CTCAACGAGCATGAGTTAAATTATTCAACGATTGAAAAAGAATTATTAGCAATCGTTTGGGCCACTAAAT  
ACTTTAGGTCCTATCTCTTTGGTTCGACAATTTCAAATCCTTAGTGATCACAGACCACTCGTCTGGTTAAATA  
ATATGAAAGAACCTAACATGAAATTACAAAGGTGGAAGATCAAGCTAAATGAGTTTGATTTCCAAATTAA  
ATACGTCCCAGGAAAAAGAAAATTATGTGGCAGATGCTCTGTCCAGAATTCAATTAAACGAAAACTTCTTA  
GGCGAAGATACAATTAGCACAAAGAGCAACAATACATAGTGCTCAAGAAGACAACAGTAACCATTTACAA  
ATCACAGAAAGACCACTTAATTATTATAATCGACAAATAGAATTTGAAAAAGGAACCGAGAACGAAACA  
AAAGTTACGAATTACTTTACAAAACCAACATAAAAATTACGTACAAAGACATGACTAATACGCATGCCA  
AAGAATTAATAAAAAGAACTTTATGCACAAAGAAAAAGTGTGCTATACTTCCACAACGAAGCAGATTTTCC  
AATTTTTC AAGAAGCCTACTTAGAAATAATAAGTCCGAATAATTCAACAAAGGCAATGAAAAC TAGTACA  
AAATTAATAGACCTTCAAACATATGCAGAATTCAAAGAATTAATATTA AAAAAGCACAAAGAATTATTAC  
ATCCAGGAATTGAAAAAACTATCAATTGGTTCAAAGAAACCCACTATTTCCAGATTATCAAAATCTAAT  
AAATGAATGTGAGACTTGCAACATCGCAAAAACAGAACACAGAGATACAAAATTA ACTTTTCGAAATAAC  
TCCGGAAATCGCTAATATCCGAGAAAAATATGTAATGGATTTTACATAGTAGGAGATAAACAATTTTAT  
CTTGCATTGATATCTATTCAAATTTGCATCATTAAATAGAAATAAAAAGTAGAGACTGGCTAGAAACCAA  
ACGAGCTATATTACAAGTGTTCAACCAAATGGGTAAACCCATCGAAATAAAGGCAGACAAAGACTCAGCT  
TTTATGTGCACAGCTTTGCAATTATGGCTAAAATCAGAAGCAGTAAATATTAATATAACCACTAGTAAAA  
ATGGTATATCCGACGTAGAACGATTTCATAAGACAGTTAACGAAAAACTAAGAATCATTAACAGCGACTC  
AGACGTGCAAAAATAAACTTACAAAATTTGAACTATACTCTACACGTACAATCATAAAACAAAGCACAAA  
ACGACTAACAGAACACCAGCGGACATATTCATATATGCAGGTACACCAGAGTATGACACACAAGCTAATA  
AAGAAAAACTAATAAATAATCTCAACAAAAAACGAACAAATTATGAAATTGACACTAGATACAAACACT  
CACCGTTAGTTAAATCAAAGACGACAACCCCGTTCAAGAAAACAGGAGAACTAAGACAAATCGACGACA  
AACATTTTGAGGAACTAACAGAGGCAGGAAAATAACACATTACAAAACCAAATTCAAAAAGAAAAAGA  
AGACTAATCAAAGCAAATATAACAATTACAGGTCAACAACAGACAGCGATCAAAACATACAAGCACCAG  
CTTAAATTAATTATTATAATATTACTATCAATAACTGTAACTATATAAATGCACAGAGTATTGAAATTAA  
TCCTATCAAAGCCCATAACGGATATCTCATATTTAAAACAGGAACCATAGACATTCGGACAGATTACGAA  
TTCCCACTGTTTAACGGTTAATATAACAAAAACCGAAGAACTTTTAACAATTTAATTGAACAAAGTAAA  
GAATTCAATAACCTTATACAAATCGAATACCTAGTAGAAAAATTA AACAGAGAAATAAACGGCTTAAAA  
ATAGCCAAACGCAACAAAAGAGGTTTAGTTAACATAGTAGGAACAGCATATAAATACTTATTTGGAACAT  
TAGATCAAGAAGACAAAGCAGAAATTGAACAAAAAATAAGCAACTTAGCAGAAAACAGCGTTCAGGTTA  
ACGAATTAAATTACATAATAGAAGCTATAAAACAAGGGGATAGGAATCATGAACGAACTAGATCAAGAG  
AAACAAAAAGGGAAGAAATTAGATATCCTTATATTTAACTTACAACACTTTACAGAATATATAGAAGACA  
TCGAGATGGGAATGCAGCTCACAAAGATTAGGAATTTTAAACCCAAAATTA CTA AAACATGACTATTTGTT  
GCATGTTAATTCTGAGAAATTGTTGAATACAAAAACTTCCACTTGGTTTAAATCAGATACAAACGAAATA  
CTGATAATATCCCATATTCCTCGAGAAATAATAAAAAGCCCGGTATTCGAAATAATTCCATACCCGGATG  
AAAATAATAATATTTTGACAGAAATAGCTCATGAAAAATATTTTACCCAAGATAAAAAAGTTTATAGCAG  
AGAAACAAAAAAATTAATTAATAATAAATGTTTAAACAGGAATTTTAAACCAAATAACATCAGAATGTAGT  
TATACTAAAATTTTGCAAAATTTTCAAATCAACTACATAGAACCAAATATAATTTTAACTTGGAATTTACC  
AAAAACTATATTAAACCATAATTGTATAAATAACGAAATAACAATAGAAGGAAACAATATAATAAAAAT  
CTTTAATTGTTTATTGCAAATTAATGAAATTTCAATTTCAAACAATATGTTAGATTATACCTCAAAGCATTT  
ACGTAGGCAATGATGTTATAAAATTAGAACCCTTTCGTTTGTACAAACGAAACAAATTATTATATGCAC  
ATACAAAATTTACCAATGTATTCCAGATAATTACAATAACCATATTTGTAATCATATTAATAAGTTTAACA  
CTGTATTGACATATAAGTTCAAAGCATACTTAAGAAATTAATTATAAAATATAAAAAACCCAAAGTAGA  
AGAAACACCTACAATAATAGGAGATATACCAATTCTAAAAGAAGAAAATGTTACACTATATCCAAACTTA  
AACACCTGAGGACAGGCACTTTTCTAATGGTTGGGGGAGTGACATATCCATAGTCGCACCCACCCTTTAA  
CATAACTTAGCACATAAGCATAAGCACAAATTATAAACATTTCTAATATTGTAAACAAAGAGCCTGGTGAT  
AACATCGACATTGGTCAAGATCAAACGTCCCCCTTTGGTAGACATAAACAATTCACCCTAAATATCACGC  
CACTGTGGTAGACATAAACAATTCACCCTAAATATCACGCCACTGTCAATGTTCCCATCAGAGTACTATCC  
CACGCATAATTGCTGACGCAGCTCAAACCTTCACTCAATTTTGACTCAAACCTCTCTCAAAGCGAAGTTTGCT  
AAGCGACCGCAACAGTTAGATAAATCAGTTCATATTCGGGAAGCAAATCTGAATGTACTCAACAAAAGTA  
GCCGTTAAGTGAAATAATAAATTGAAATATATTTTTTTTATAGTAACCTAACGTGTAAAACCTTAATT

>160\_rnd-1\_family-335\_\_LTR\_\_Gypsy

ATTTTACATGGCGACCGTGACTTGGTCAACGCATCCCTGCCTGGAGGAAGTAGACCAAGTGAAAAGGAACT  
TCATGGCCAACAAAGAGGCCATGTATAATATACAATTTGAAAAGGAACTTCATGGCCAACAAAGAGGCC  
ATCTATAATATCCAAGTGAAAAAGGAACTTCATGATCAACGAGAGGCATCCCGTATTCTGAGTGAGTAGA  
GAGTGAGTGTTATGGTTCATAAACGCGGTGGCTTAAAAAATAAAATTAATAAAAGAATAGCGCACCTAAG  
GTGGCTGCTATACACAAAACAGCCAACACCCGCATGGTTCGACAGCTCAGAAGAAAATTAATTAAGCAG  
AGAAAACCAAACACCACTACTCACTCAAATATAAAAGTTCTAATAAACCAAACAATAATAAGTTACAC  
CCATTGACGCAACCAGCCTACCAAAAAGAAAAACGAATGTGCCACAGGATTGCGAAGGCCCCACTCGACA  
GCCCTTCTGCGAATATACGTGCAGACACTGCACAGCCAGCACCTCCAAACATTACATTACAACCAACAA  
ATAAACACCTGTGCGAAGACCAGCACCGGTACCGCCAGCGCAACAAGCTGTGCCATCGGAAATAAGCGC  
GAGAGGCACACCGCCACTTGCGCATACGAGGGAGCATCAGCGTGCCACATCCGGCGACGCCAGCTGAT  
GCAGACGATGAGCAGCAGATTGAGCTAACTTTTATACTTACATACACTAAACATATAAANAATTTTG  
TAAAATTGAGCGGAATCANTTCCGCCCGATTAGAAGCGTAGCCCGTAAAGCTATGCGAAANNATAGGTAG  
GCAAATGTTAAATAGAAACATCCAGATTGTGAAAAAAAATTTGCTTTAACAAAAATTAATGCAAGACACA  
ATTAAGAGAATATATATTTGTAACCAGTTCTAAGAATATAATAAATTTGAAAATGGGTTCGTGTGGCTCA  
GATGATAGTCAAACAAAAGATAATACAGCCTTTGTGGTCAATAAAGTAAAAATAGTTGATCACACAGAGG  
ACATTCAAGCTCTGTGGATTTTAACATTTATATTACAAGCTCAATTTTTCTCTACTATGTGTGTAAAAATAA  
ATAAAATTATTAAGAAAAACAGGTAAGAGGTTCTAGTCGGGAGCTCCCGACTAGGGGATACCCTGAA  
CCCTCTTCTTCCAACATCAAATTCATATATATATTCTATTTTAGAAGCTATATGTCAAGTTTGGTGACTCTA  
GCTCTTATTTTTTACCAAAATTGCCCAACAAACAGGATATCGATATCGATTGCTTGGAACGGAGAACTT  
ATCGATTATCGGAAACAACTCGATCTGCGCAGGCACTAGGAGCACCTACATTTCAAGTCTCTAATTCTTA  
TAGGTTCTGAGTTACTTGCGTTCATACATACGGACGGACGGACAGACAGACGGACGGATAGACAGGCGTT  
CATGGCTAGATCGACTCGCCTCTTGATGCTGATCAAGAATATATGTATTTTATGGGGTCGGAGATGCTTCC  
TTCTGCCTGTTACATACATTTGGATTTTGCACATATACAATATAGCCCTATATCCATTTTTAATGGGTTCAG  
GGTATAAAAAGTATCAATGTTTAATTGATAACATTCATTGGAGCCATGAATGAAATGATAGTGTCCAAAT  
CAAATAATAACACACAAAATTGTCCGCAAATCAAAGAAATAAGATCAAATTTGACAAACCATATAAAT  
GTCTAACGCAATACAAAGAAACACAGCAAAGTACAANAAACAAACACGCAAATATATTAGTAAAGTTTT  
TAAATGAAGCACGAACATTATATTCGACCATAGAGAAAGATNACCAATCAACATTTGTCACAAGCCTCAA  
AGGTCTTAACCAAATTTTGAATAAATTAAGTTGCGATAAGAGTAAAGAATAATTTGGATAAATCGATTCC  
AACTATACTGAACACAGCTTTAACAATCGAAACAGCTAAACAGCCTGAAGATAAAGAAAAGAAAGAAAG  
TGAATCTGATACAGTCACTGACATGGAAGTAAAGACACACATAATCTTACAACCTTCAGCGATA  
ATTGCATTACCTGAATTGTCAGAGTGTTCTGATTCTGAAGCAAACACCAGTGTAATAGAATTAACCTAT  
TACGATGGAAGACACTTCTGCCGCTCAAGGGCTTCCATAAAAGAAATTGTACAGGCCACACCGGAAATC  
GATGGAATAAAATCCATCTACAAATTTATTGCTGCAATACAATTAATAAACCTAACANAAGGTCCATACG  
AAGAAATTGTAATTGAAGTAATAAAATCCAAAATAGTTGGTTCAACTCTTTATAAAATACAAGATGAAAT  
CACAATAAACGCGATGCTATCTAAATTGCAGACTATGATTTTCGGCGATTTTCCGATGTAGTAGAGGCAA  
AAACGGCTTATTTCTACCAAAAATGTAAATTAGCCACACAACCTCGCAAATAAATCGATAATTTGGAATC  
TTCTTATATCGATGAAGGACGAAAGGCAGAACATGCTGATACGTTCTGTACCAAAGAAGCCATTTTCAGTC  
ATGATCAAAATTTTGAGCATGACAACTAAAAGCAATACTTTACGCAGGCACATTCAAAACGATGCACAA  
AATATATCCAATACAGTATAGTTATGACAGGCAATGCATGCTCGGTATTGTATTCTTGTATTGTAATACT  
GTAGCAGGCTTCTAGCAACACAACAGTGAAGCTGCACGTCCTATCCATAGGTAGCTGTTAAGTATTGTTTCG  
ATACTAAGAATAAGAAATAAGAAGAAGAAGAGTGTTAGACAATTGTAAAAGATCTTGGAGTCAGACCT  
TAGCAGAGAAGCGAGTAAAGTAGACGTGTTTTGGACTTGCTGAAGCTAAAAACTTTTGTATTGTAACGGC  
TCCTACATAACTATCGTGGTAATTACCGAGGCAGAGAAAACCTCTCGTGGTTATAATAACAATTATAACAA  
TAATTGTGGAACTATAGAGGTAACAACCGCCTAAACGGAGATTACAATAATGGAAACAACGCCTCAAAT  
AATAATAATAATAATAGCAACAACCTACAGACACAACGGTAATGTCCGTCATGTCCAAGACTTAGCAGAAA  
AATGAACGAAAAGTAAATTTTTAGAAAATAAATTTTTAGAAATATAAATTGTTAGAAAGATAAATTGTTAGA  
GAGTAAATTGTTAGAAAGATAATTTATTAAGAAGCAAATTGTTAGAAAGATAAATTGCTAGCAGTCAACGAC  
AAATTGTTAGGTTACGAATTAATAACAGAGAAGATCGTTAGATAAAAAAAAAAGTTAGATAAATCGTTAGA  
AAAGCAGAAAAGGGAGAAAGGAACAGAGGAGGACACAATTAATAGAGAGGATTTTAAAATTTTGAATA  
GGATTTTTAATTAAAATGATATAGATACAGAAGTTAGTGAAAAGGTTTATAACATTGATAAGCAGGTAGA  
GTATGCATTAAGAAACAAATTTATACAGATGCTAGATGCTACATACACAAAGGCAAAGAGACTAGATAGC  
CCTAAAATTAGATACGAAATATAGATTACAGTCGAGAAAGCGAAGCCACTTAGTTGCTTGCCAAGGCGAT  
TATCGTACACAGAAAAGAGAAATTACAAATAATGTTAGACGAATACCTTAGAGATGGAACATCCAACCCA

GTAGCTAATAATATGCTTCTGCAATCGTTTTAGTTAAGAAGTACACCGATGATTTGAGAATGTTTATTGCC  
TTCTGAAGACTAAAATAGATCACGATTAAGACAATTATCCGTTGCGTTTAATAGACGACTTGTTAGATAG  
GCTTGCAGGTAAAACCATATTTACTAACTTGATATGAAAAACGGCTATTTTACGTTTTTGCTGAGAAGG  
AATCTATTAAACACATCTTTCGTGACCCTTTGAGGACAATTTGAATTTTGAAGAATGCCCATGGGATTGAA  
AACGGCCTCTCAAAAATTTCAAAGATTTATTAATAATATCTTTTCGGACATGATAAGGGATAATATAATCG  
TATACATGGATGNTATTATGATTGCCGGCAGGAATACTCACGAGCACTTAGAAACCCTAAGGGTAGTGTT  
TAAGCGTTTGTAGACAATAAGCTAGAGTTGAGGCTGGATTTTATGCAAGACCATATAAAATATATAGGG  
TTCGAAGTCTACGAAGACGGCAGGAAAGCCGATGCAAAAGGTTTCGGAGGCGATAAACAATTTTCCGATA  
CCGGATAAAATTTAAGCAGTTCAACGTTTTTTGGGACTTTGCGTGTACTTTAGGAGATTTATTAAGGATTT  
CTCAACAATCGCAAAACCTTAACATGATTTGTTGAGAAAAGACAAAATATTTTCAGTTTGGGGAAAACGAG  
CTAAGATGTTTTGTGTATCTTAAGCAGAGATTGTTAAAAGCACCGGTACTATCGATTTATGATCACAGAGA  
TGAAATTGAGTTGCATTGTGATGCTGGTGCCTTAGGATTTGGAGCAGTATTGATGCAACAAGATGTTAG  
ATTGCATCCGATATTTTATTTACGAAAGCGAAACACCACAGCGTTGAGCTGGAGACCTTAGCCATTATAT  
ATGCATTACGAAGATTCTGGATATACGCGCAAGGGAAACGGTTCACATTCATATCTGATTGCAATTCCTG  
ACACTGACCTTGAACAAGATTGNCCTTAATCCCAGAATTGCAAGATGGGCGTTAGAGCTACAAGAATTCG  
ATTATGAGATAGTGCATAGAGCAGGTAAGCAAATGCCACACGTTTCATGCATTGTTCGAGATGTCATAACAC  
GATTATGATAACGGAAGCAAATAACTTGGAAACCAATTTAGTAATATGTCAAACANGAAACGAGAAAAC  
AAGGGATATTAGGAAATTGTTGGAGGTAGGTGAGCTTAAATTCTTTGAAATGAGAAATGGAGTAATATAT  
AAAAAGACGAATGACAAAAGATTAAATTTCTATGTGCCAGAAAATATTATATAAAAACCATGACGAGCTT  
GGGCATATTGTTAGGGACAAGACGTTAAACGCGATAGTTAAACTTACTGGTTCCCGAACGTGAAAAGAA  
AAATATTGAGTCACATCGAAAACGTGTTTATGGTGCATATCATTTTCACCTAAGACAGGAAAAGAAGATGG  
GCTATTGCACAGCATACCAAAGGGCAACAAATCTTTGACTTAGTTCATGTAGATCATTACGGACCAGNA  
GACAACAGCAGAGCAAAGAAATATATATTTGTAGATGTAGATGGGTTTCAAAAATTTGTTAGATTATATA  
CAACAAAGACATGAAACAGCAATGAAGTTATCGGCGCATTGAACGATNACTTTTGAGCCTACTGTAGGCC  
AAAATGCATAATATCTGATCGAGGAAGCTGTTTCACATCGGCCGAATTTGAACAATTTGTAGAAAAATTA  
AACGTGAAACATTAATATAGGCACAGGCAAGCCAATGGACAAGAAGAGCGAATTAAGAAGAGTTTAGGA  
CCAATTATTGCGAAACTAACCGAACCTGAAAAGGGACAGCCATGGGATATTATCATCTAAAAAGTAGAAT  
ACACTTTGAATACTCATACACTTTGAACACTCAGTATAGTAGCACCAGGTTTTTTCTTAGCACAATGTTATT  
TGGGTTACCACAAAAAGGAATAATTATTGACGAACTAAGTAAAAAGTTAGAGGAAACCAAAATATTAGA  
CGCAGCAGACGAGCGAAACTTAGATGATATTAGACAAAATCGCGTGGGGGGCCGCTCCTAGCGCTCCGCT  
GCACTCTTTGCACTTCGTCGCTCACACTGCTCTTCGCTGCAGGTCTACTCATCCTGATAGTCTTTCTAAAAG  
TGCCAGCACGCTCGCTAGCGAGCAGGGCGCTTGCCCTCGGCCGCTCGAGTTCCCCGCAAGCTTTTCGCAACT  
ACACCTTGCCCTTCGCCACTGAATTGTAGTTGTGCTCTCGAACGCGGTGTTGAGCAACAAATCAGCAACGC  
AAGGTTTCTGCGACGGCCGGCGGTAAAGTTCAAACCTCAATTCAAACCTAGGCTCCATGACCTTAAGTAGCTT  
CAATACATTAGCACCTTGCCCTTAAGTGTCTTATTACTAATAACAATGCTTATATACTATAACAATGCTTATAC  
CCTTTTATTATAATTATGAACTGTGGGGTGGCTACCTTAGTGGCCGCTCTCACAACCGCCAAAACGGAGATT  
ACAAAATGGAACAACGTCTCAAATAATAATAATAATAATATGAAAAATAATAATAATAGTAATAATA  
ATAATAATAATATTAANAATAATATTGATAATAATAATAATAATAATAATAATAATAATAATAATAATA  
TAATAATAATAATGAGCATCAGCGTGCCACATCCGGCGACGCAGAGCTAATGTAGATGNTGAGCAG  
CAGATTAAGCTAAACTTTTATAACTTACATACACCANACATATAAATAAAATTTTTTAAATTTGAGCGAAAT  
CAATTCTGCCCCGATTAGAAGTGTAGCCCGTNAAGCTATACCAAACATAGGTAGGCAAATGTTAAATAGA  
AACATCCAGATTGTGAAAAAAAATTGCTTAACAAAAATTAATGCAAGACACAATTAAGAGAAATATAT  
ATTTGTAACCAGTTCTAAGAATATAATAAATTTGAAAATGGGTTCGTGTGGCTCAGATGATAGTCAAACA  
AAAGATAATACGGCCNTTGTGGTCAATAACGTAANAATAGTTGATCACACAGGGGACATTCAAGCTCTGT  
GGAGTTTAACACNTATAAGTATTACAAGATCAATTTTCTCTCACTATGTTTGTAATAA

>9\_rnd-6\_family-393\_\_LTR\_\_Gypsy  
TATATATATAGTGACATATTCACAACAACAGCATTTTGAACCACTGTTATTCATAAGCTAATTGCATGGCA  
TAACCCATTGTGTGTTTACAACTGAATAATCATAACAATAACATGCCTTCTGCATCCGAATTCAAATAAC  
GCTAACAGCAGCAAAAATCCTAAGAGCAGAATGCCTTCTGCAGCCAAGCTCACATATTGTCAACAATCAT  
TTATAAACAAAACTGATCAACAGAAAGGCGCTAGCATAAACAAGCTGCAGCCGCTGTCCCTTTGCAAAA  
AGTCACGTACTCCAATTATTATTAGCTTTAAATATAGCGTAAGCCAATTTTGGTAGCTCAGTCTTACTCCA  
GATATTCAACATAATAAACCGATACAGATTCACGGTCGGGAAATATAGTTTTTATTTCCAACTTATAACT  
ACGTTATTGGCGCAGCCGGTAGGATAGCATTTTGTGAAAAGAAATAAATTAAGTTTCGTGAGTGATACGA  
TCAATTAAGAGAGGCTTATCCATACAACCTGGTGTCTTCTCTGATCAACAAGTGTAATTGTGCACAGTATT

ACAACCTAAATCGAATATATTTCAACTCCAAAATTCGCTATCCGCAAAAGAACTTAACGTGTGAAAAACAAT  
TCAAGCAACGTATAAATCCAATTCGGTTCGTTGCAACAAAGTGAATTTTCGTGACACAAAAAATAAATG  
GAGCAACCAGAAGGCTCTCATGTGGCTGCACTTGCAGCAATGAATAAATTAACGACCAAAATTTAAACC  
AATTGCTTCAACAAATACGGAACGTGCCAGCCTTTGAGGGAGACCCTATAACCCTGGGTCCATTTATCAG  
AAGGATGGATTACCTGCTTCAACTGTACTCTACTCACAATGAACGACAACAATGCATCATATTCGGGGCG  
ATTGAGCTCCAGATATCCGGAGATGCCGAGAAGGTTCTAGAAATGCTGCAAATCAACAACTGGTCCCAAC  
TGAGGGAAGCCTTAATCTCCGAATACAAGACGCAAACACCCGTGGAAGAACTACTGCGAAGACTATATA  
ATACCAATTATCAAGGTAATTTACGTAAATTTTGTAGTGAGGTAGAGGCTAAGATAATAATTATAACTGA  
CAAGTTAGAATTAGAAGGGAATTTAGATAATTCAGATTGTACACAAACGCTATGCATAACACTGTAAAA  
AACTTGATAAATAAAAAAATTACCAGATAGACTCTTTATGTCACTCGCAAGACATGATATATCCACTATTT  
CCAAATTAACAACAAGTAGCTCAAATGGAGGGCTACTATGAGGAAAAATTATTATAACAATAATAAAAA  
ACAAAATACTAACAATGCTATAAATTATACAGGCAATACTAAACCTCAATTTACCCCAAGTTACATAACT  
AACAAATAATCAAAGCCACAATTTTTCACATCACCCCTCCGAACAACCAAACCTTATTTTAACCAAAATAAGC  
AACTAGCTCAAGAATTCAAACAGAATTTACAACAAGCACAAATAAATAACCCCATAAATCAAAAATATTT  
CTCAAGGTAGATATATACCAAATCAACCGTACAAGCGTATACGAGAAAATACTAGTGGTTCCCAAAAAAT  
GCAGGTTGATGAAAATTATCAACAATCCGAAAACCTATCAGGGTAACTATGTACAAGAAGAGTATGGTTGT  
CAGAACAACCAATATGAGGTGTTTCAGAATAATGAAATAAAAGACGAAAATTTTCCAATTGGAGCCTCGG  
GACAAGCCAGTACATAGAAATTAATAAATAACAGACGCTACAGATGTCTCATTGACACTGGGTTCGTCA  
ATAAATATGATGAGGGAAAACTTCCTTAATATACCAGTTTATACAAGACCTACTTCGATTAGAACCATGA  
CAGGGATATCAAATAAAACCATTATGTATCCACTGCACCTAATAAACTCTTTAGGCAAGATCAGATATTT  
TACATACATGATTTTTACCTCATTATGATATACTTTTAGGCAGAAATTTATTAAAGGCCAAACAACGCCAT  
AATTGACTACGCTCATGACAGAATAATAATTAGCGAGAGATCGTTCAATCAGAAGAAATTAGTTTGGGAT  
CCAAATTCAGAAAAAACTTCGAAGCATATTTAAAGCCAGAAAGTTATACACTAGAAATTAATTACGCAA  
TAAGTAATGAAATAACATCGGGAGAAGATTACCGAGTTGATCATCTAAACGTTGAAGAAAAATCAAACT  
ATTAAAATTACTGAAAAATTTCAAGTGACATTCAATATCGAGAAGGTGACAATTTGACCTTCACGAGCATT  
GTTAAGCACGAAATTAATACACATCATGAAAATCCAATTTACAAGAAACCATACGGTTACCCTTTTCGCTTT  
CGAACAAGAAGTCGAAAAGCAAATTAAGATATGCTAACCCAAGGTATTATTCGGCATAGCCAGTCGCCT  
TATTGTAGTCCCTTATGGATCGTACCAAAAAGGCAGACGCCTCAGGAAAGGCCAAAATTTAGATTAGTGGT  
CGATTACAGAGGATTAAACGACATTACAATCAATGATAAATTTCCCATTTCAAACATGGACGAGATTTTG  
GGAAAATTAGGAAGATGTTTACTTTTACAACAATAGATTTAGCAAAAAGGTTTCCATCAGATTGAGATGG  
ACAAGAATCAATTAATAAAAACAGCATTCTTCTACCAAATACGGACATTACGAGTATACTCGAATGCCATT  
TGGACTTAAAAATGCACCAGCAACATTCCAAAGGTGCATGAATCACGTTCTTCGTGATTTAATTAACAAG  
CATTGTCTTGTTTATTTGGACGACATTATTGTCTTCTCCACATCACTTGAAGAACATTTAAATTCAATAAAT  
AAAGTTTTTGAAAAATTAAGACAGGCCAAATTTGAAACTTCAATTAGATAAGTGCGAGTTTTTAAAAAAGG  
AAACAGAATTCTTAGGCCATATTATAAGTCCAGAAGGCATACGGCCAAACAATTTGAAAGTAAAAAGCA  
ATACAAGAATTTCTTTTGCCAAAAACATCAAAGGAAATTAATCATTTCTAGGTTTATGTGGTTATTATCG  
AAAGTTTATTCCAGATTTTGCAAAAATTTGCAAAAACCCATGACTCTTTACCTAAAGAAAGCGGCCAAAAT  
GATATCAAAAATGTTGAATACAATAAAGCCTTTGAAAAATTAATAAATATTAAATTAATAAACGACCCAATAT  
TAGTATGTCCAGACTTTAATAAAAAGTTTCAGGTAACAACCGACGCAAGTAATTTTGCAATAGGAGCTGT  
GTTGTACACAAGATAACAAGCCAATTAGTTTCTCAAGTAGAACGTTAAACGATCATGAACAAAAATTACAGT  
ACAATAGAAAAAGAGCTTTTAGCAATAGTGTGGGCAGTAAATATTTTCGCCCATATTTATATGGCAGAC  
CATTTGACATTTTAAGCGATCATAAGCCACTCGTTTGGCTAAACAACATTAAAGAACCCAACATGAAATT  
ACAACGTTGGCGTATTAACTTAGTGAATATAATTTCTCAATCAAATACTTAGAAGGAAAATTAACCAC  
GTAGCAGATGCTTTATCACGCATCAAAATTGAAGAAAATATGCTAGGCGAACAAGATATTAACACACAAG  
CTACAGCACATAGCGCTGAAGAAGATAATGAAAATTTAATACATTTAACAGAAAAACCATTAACCTATTT  
TAGAAGACAAATAGAAATGATTAGAAGTGATACCGAGCAAATAGAAGTTGCACCATATTTTAAAAAATTA  
AGAATAAAAAATCGAATATTTAACTTAACATTGAAAAAGCTAAACAGATATTGATAAAACATTTTTGCA  
ACAATTCAAGCGTATTATACATTGAATACGATTCCGATTTTGAGATAATACAACAAGCCTTTAAAGAAAT  
AATGAACCCCAAAACAACCTCGAATATTACGAACAAATATTAACTGAAAGACATTAGGAGCTATGCAGA  
ATTTAAAGAAATAATAGTTAGCAACCACAAGAACTTTTACATCCAGGCATCGAAAAGATGGTCAGACTT  
TTTAAAGAAACATATTATTACCCAGACTATCAAAATTTAATCCAAAACATAATTAACGAATGTGAAGTTTG  
TAATCTAGCTAAAATTGATCACAGGAACACATCTTGTAATTTTAAATTAACACCAGAAGTAGAAAATGT  
AGAGAACTTACGTAGTAGACATTTATTCAATAAAAACCACAGCTATTTAACATGTATTGATTTATATTCA  
AAATTTGCAAATGTAATTGAACTTAACGGCAAGGATTGGATGGAAGTTAAAGATCCAAATATTTAACAA

CATGGGAAAACCTATAACTCTGAAGGCAGATAGGGACAGTGCTTTTATGAGTCTTGCCCTGAAAGAATGG  
TTGAATAAGGAAAAAAGTTGAAATTCAAATAACAACAAGTAAAAATGGTGTAGCGGATATAGAAAGACTA  
CATAAGACAATTAATGAAAAAATACGCATTATAAATACTGACGATGACGAAGAAAATAGACTCATGAAA  
ATTTGAGGTAATTTTATACACTTATAATCATAAGCTAAAACATAACTCTACTGGAAGAACTCCAGCTGACA  
TTTTCATTTACGCAGGTACACCTAATTATAATACCCAAATTATAAAAAGAGACCAGAATAAATAATCTTAAT  
AAAACCGAAATGAATTTTCGCAGTAAATACAAAGTTTAGGAAAGCACCCATAATTCACGGTAAATTACATA  
ACCCTTACAAACCCACTGGGAAAATAGAACAAATTGACGAAGATCATTTTTGAGGAGACTAACAGAGGTC  
GAAAAATTAAGCATTATAAAAACAAATTATCAAAAAACAAAAGAAATTAAATAAGAGCAAATATTTACAGG  
AGGACGAAGTTCCAAAACAGGACATATAACNTTCATTTTTCTGGCACTAATGATGTCAACACTATTACCA  
GGAAGTAATAACCAGTTTATAGATATTAACCCCTATTAAATCAAATAATGGATACTTACTCTTTAAAATAG  
GCATGATAGACATACCCGATAATTACGAGCACCCTGCCTCACAATAAATTTAACAAAGACAGAAGACAC  
ATATGACAAATTAATGTTACAGACAAACAAATNTAAGGACAGAATACAAATTCATATTTGACAGAAAA  
GTTGCAAAGAGAAATAAACGGTATCCGAATAGTAAAAAGAAGTAAGAGAGGATTACTTAATTTTCGTAGG  
AACAAACATACAAATACTTGTTTGGAACTTTAGATAACAACGATAAGGAGGAACTTGAAGAAAAAAATGA  
ATTCAATAGCTCAAAATAGTATTCAAATAAACGAACTCAACCATGTTATTGAAGCGGTCAACCAAGGAAT  
AGAAATAGTAAACAAAGAAAGAGAAGAAAGAGAAGAATTTAAAGTACTGGAAGTACTTGCATTCAACTT  
ACAACAATTCACAGAATATATTGAAGATTTAGAAATGGGAATGCAACTAACTAGATTGGGAATTTTAATC  
CAAATTATTAAAACACGACTATCTCACAAACGTTAATTCGAAAAAGCTACTTAACATAAAAAACATCT  
ACTTGGCTTAGATCAGATACGAATGAAATTTTGATTATTTACACATTTCCTAGAGAAATAAATAAAACCCC  
ATTATACGAAATNCTACCCTACCCGGACGATGATAAAAAAATTTACAAGACGAAACACAATACAAATACT  
ACTCACATAATAATAATTTATACAACAAGGACAAGAAAAATTAAGTATTAACCAATGCATATTAGGTATA  
ATAAAACAACTAACACTAGTTGCAGATTTTCAAAAACACATCTAATAACACAACTAACTATATCGAAC  
CGAATATACTTATAACATGGAAGTTACCCAAAATCACATTGAATCAAACTGTATTAAAAATGATATCTTA  
ATTGAGGGAAATAACATAATAAAAATTTTATAATTGCTCAGCAATACTTAATGAGATATCTATAAGCAAT  
TTGAACTCAGACTACACACAGAGTATATACGTAAGAAATAATATTACTAAATTAAAGCCACTTTTCGTACA  
TTCAAACAAAAGAAATAATTTTCGAAAATATTAAAGAAATGAAAAATATTCCAAATTATAATAAATTACA  
GTATTTGTAATCATCATATTAATCATAATAATGTATCTAGCATATAAGTTTAAAAATATACCCAAACAAAT  
ATTTATTAAGAAAGTAAATGTTATTGATCAACCACCTGCACAACCTCCAGTTGAACTTGAAATCGAAAAT  
GAACAAGAAAATTTAAATATGTTACCAAAATTGTATCCTAGCATTTAAAGAATATTTTTTATTATACTTAC  
CTTTTTTCATATACCCTACACGCGTGAGGACACGCTTTATTTTTGTGGGGAGGAGTGACATATTCACAACAA  
CAGCATTTTGAACCACTGTTATTTCATAAGCTAATTGCATGGCATAACCCATTGTGTGTTTACAACTGAAT  
AATCATAACAATAACATGCCTTCTGCATCCGAATTCAAATAACGCTAACAGCAGCAAAAATCCTAAGAGCA  
GAATGCCTTCTGCAGCCAAGCTCACATATTGTCAACAATCATTTATAAACAAAACACTGATCAACAGAAAGG  
CGCTAGCATAAACAAGCTGCAGCCGCTGTCCCTTTGCAAAAAGTCACGTAAGTCAATTAATTATTAGCTTT  
AAATATAGCGTAAGCCAATTTTGGTAGCTCAGTCTTACTCCAGATATTCAACATAATAAACCGATACAGAT  
TCACGGTCGGGAAATATAGTTTTTATTTCCAACTTATAACTACGTTATTATATATAT

>160\_rnd-1\_family-52\_\_RC\_\_Helitron

TACACCAGAAATGTTTGCGGAGAAAATATATGAGCAAAGCTAACGATCTAGATAAAATCTAAAACTAA  
AAATAAAATGTTAACAAAAGCCGCTACATCGATTATTGTTATCATTGTGCCTCAATAAAAGTGCATATTA  
TCAAACAAACAAAAATAAAACATGTTTCGAGTTCTAGTGGNATTATATAACAAAGTCTTGACATTGTAAA  
CAACAATGAACGTAGGTTAAGCGATTTACATTTAACACAATCAATTGACGTGTTAAATAGCCTGCGTGAA  
AATATTAGACATATTTTCGGAAGACATAATTTTCAAATATTTGTTCCAAATGCGCTAAATACACCAGCAAC  
ATTCGAAATCACTGATTTTCATGATATCAGTAGAAGAATAACTTAAACAAAAGCAAGAACAAATCGAAATA  
GTCGACATGGCTCAATCACCAGTAGATTTTCTTAAGATAGCCTTATCGCTCTTACCAGAGTGTGATGGCAA  
GGCAGAAAATTTAAAAAGCTTCATAGATGCTCTGAATCTGGTAGATTCTCTAAAAGAAACACACGAAGCA  
CTTGCTGTAAGTCTTCTTAAGACAAAACCTAGAAGGCCATGCCAGGAACCTGATAAGTGATGAGAACACTA  
TTACAGCTCTCATATCGAAACTATCGGACAAATTAAGAGGAGAGTCAGTAGAAGTTATTTCTGCTAACTT  
CTAACTTACAACAAAAGAGCAAAACGGCCAATCAATATACCCAATAGGCTTAAAATTGAAAAAAAAG  
TCCCTTGAAGGAGTCTATATCAGTGAAGGTCTAAGCCAATCACTTGCAAACACTACAAGAGCCGTAAAAC  
CTATGACCCAAAATTGTTTCGATTGATAAGGTAAAACCTTATCATGCAGGCAGGCACATTCACAAATATGAA  
TGATGCCGTCTCCAAATTTGTCAATAGTTGCACGGAGGTAAACAGGTCAAAGTAACACTGTCCTGTATTATC  
GACGAGGTGTAAATCAAAATAATAGACGAGGCCGAAGTTATAATCGTGGCAAAAATTGCAACCACAACA  
ATTGCAACTGCGGCGGTAATAACAACAACAACAATAATTACAATAACCGTGCAGGAAGACGAGGCC  
AAAATCGGGGAAGAGGCCGCGGGAAGTCCAACCAAGGTAACAATTATAACAATGTGAGAGTGGCGCAA



ATGCGTCGGAAAACCTCTCAGCACCCCTTTAGGAAACAATCAGTAAATGCAAAGGTTTCATTGCATCAATTAC  
AGTCTTAATATATTTGTCACTCTTTATAATCATTCAACTGAAAATAAACACACATTCCCTAATAGATACTGG  
TACAGATATCTCACTTTTAAAAATAAATTCAGATAATTTCAAAATTCAAGAAGACAAAATTATAAACATC  
CAAGGCATCGACCAGGGTGTAAATAAAATCGCAAGGAACAACCTTCAATAGAACTTCAACCAACAAAATAT  
ATTAATCCACACGAATTTTCATTTAGTAGACTCCGATTTTTTGAATACCGTGTGATGGAATAATAGGCATTAA  
TTTTATTAAAAAATTCAATAGCCAATTAGACTTCAAACCAAGTAAAGACTGGTTTATAATTAAACCTCAA  
ACTTAAATTATCCTATTTTATGTTCCAATGCAACAATGCATTTCTTCTGCCAGCCAGATCCCAACTAATTTCGA  
AAAATAGACATTAATTCAGTAAACGATTATATATTTGTTCCAAATCAAGAAATACATAATGGAATTTATGT  
TGCAAATACAATAGCAGCATCCAAACATGTATACATTCGCCTTCTAAGCACAACTAATTTTCGACCAATTGG  
TCAAAGTTAACAAAATCGAATATGAAAATTTAACAGATTACGATATTCATAACACTAATCCAGAAAATAG  
AAGCTAACAAAGTACTTTCAAAGTTAAAGAAAAATGTTCCAGAACAAATTCAGAAATCAATTAACAGAATTA  
TGCACCAAGTATAATGATGTGTTCGGACTGGGAACCGAACCAATAGCGACAGATCATTTTTATAAACAAA  
CATTAAAACTTAAAGATGATGAACCCATTTATATCAAAAACTACAGAAGCCCGCATAGTCAAGTTGAGGA  
AATCCAAAAACAAGTAGGGAAATTAATAAACGACAAAATCGTAGAACCATCTGTATCCGAGTATAACAG  
ACCACTCTTGCTAGTTCGGAAAAAATTATTACCACATTCGGAGGAAAAGAAATGGCGATTAGTAATTGAC  
TATCGCCAAATCAACAAAAAATTACTTTCTGACAAATTCCCACTCCCCAGAATTGATGATATTCTAGACCA  
ACGGGGCAGAGCTAAATACTTTTCATGCCTTGACTTAATGTCAGGTTTTTCACCAAATTGAACTTGAAGAAA  
ATTCAAGAAATATAACATCTTTTTCAACGAGCAATGCCTCATATCGCTTCACGCGATTACCATTTGGTCTT  
AAAATAGCACCAAATTCATTTTCAGAGAATGATGACAATAGCATTCTCGGGTTTAGAACCCTTTCAGGCATT  
CCTTTATGTGGATGATTTAATGGTGATCATGATTAAAACTTAACTGATGTTTTTAATGTATGTAGATAAT  
ATAACCTAATGTTGCATCCAGAAAAATGTTTCATTTTTTCATGCATGAAGTACATTTTTTAGGTCACAAATGCA  
CTGACAAAGGAGTATTGCCAGATGACAAGAAATTTGATGTCATCAAAAATTATCCTGTCCCTCATGATGC  
GGATAGCGCGAGACGATTTGTAGCATTCTGCAATTATTATCGTCGATTTATAAGAACTTCGCCGATTATT  
CACGGCACATAACTAGATTATGTAAAAAGAATGTTCTTTTGAATGGTCAAGTGAATGCCAAAACGCATT  
CCAATACCTTAAAGAAAAGCTTATGCATCCACATTATTACAATATCCTGATATTTCGCAAAGAATTTTGCA  
TTATAACAGGTGCTAGTAAACAAGCCTGCGGAGCGGTTCTAACTCAGAACCGTGACGGAATTCAGCTCCC  
AATAGCTTATGCATCTCGTTCATTTACAAAAGGGGAAAGCAATAAGAGCACAAACAGAACAAAGAGTTAGC  
GGCAATTCATTGGACAATTACCCATTTTAGACCATATATTTATGGCAAGCAGTTTACTATTAAAACAGAAC  
ACAGACCATTGACATATCTTTTTTCTATGACTAATCCCAGCTCGAAATTAATTCGCATGCGGCTAGAGCTT  
GAAGAATACGACTTCACAGTAGAATACCTAAAGGGGAAAGATTATTTTGTAGCAGATGCACTTTTCGCGTA  
TTAATATAAAAAGAACTCAAAGATATGCAACATAAAGTCCTGAATGTCACTACCAGGCGACAAAGTAAACA  
AAATAAAAACCTGTATAGTAGAAAATTATGAACTTCTGCCAAGGCAAAGTCATAAAAATGTATCCAAGCCC  
AACGTACATGAAGTCATCACAATGATGAAGTACGAAAAGTAGTGACCTTGCGCATAACAGAATCTAAAT  
GTTTATTTAAACATGGAAATAAAATTATCGCAAGAATTAAGTTAGCGATTTATATACCAATGGAATTCTC  
GACCTAGGCTAGTTCTTCCAAAGGCTCGAAAAAGAGACCGGTATATTAATAAATCAGCCAACTCAAAGTGC  
CGCCGAGCGAAAAGATCTTTGAATCAGTTTCAATAGATTGTTTTAAAAATATGGGCAATGAAATATTCAA  
ATCTTTAAGAGTAGCGCTACTCCAGCTGGTGACCCAAATAACAGATGATAAAGAGATACAACAAATATTG  
TCTACATACCATGACGACCCCCTATTACGACCTCAAGGAGGTCATAGCGGAATAAGAAGAACGCTAGCGA  
AAATAAAAAGACACTACTACTGGTAAAATATGACACGTCATATAAAAGAGTACGTACGTAGATGTCAAA  
AATGACAAATGTCTTAAACAAAGACGCACACATAAACTCCTTTGACTCTCACAGAAACACCTGTGACTGC  
TTTCGATATAGTGATAGTGGATACAGTTGGTCCGCTACCTAAATCGGAAAATGGCAATGAATACATAGTT  
ACATTAATATGCCACCTTACAAAATATTTAGTAGCCATTCCAATAAAAAGCAAACGCGCAAATATTGTCG  
CAAAAACCTATATTCGAAAATGTAATACTCAAGTTTGGTCCAATTAAGACGTTTCATCTCGGACATGGGAAC  
AGAAAAAACAGATTTTAACTGATTTATGCAAGTAAATGAAGACCAAGAATCTCACCTCTACTGCATATT  
ATCATCAAAACATTAGGGAGAATCGAACGAAGTCATCGAACATTTAATGAATACATTCGTTTCATACATCTTT  
GCAGACAAAACCTGACTGGGATGTCTGGATTCAATATTTACATATTGCTTCAACACTTCAACACCATCAGC  
AACGCATGAGTATTGTACATACGAACTAGTATTTGGCCGACTACTAAATAGTTCATAGATTTAAATAAAA  
CTAATTACATAGATCCTATTTATAATCTAGATGACTACTCTAAGGAAATAAAGTTTCGATTAGAAATAGCA  
TATAAAAGAGCTGGAATTATGTTAGAAAAAGCCAAGGCTTATAGGAAATTAGCATACGATAAAAAAACA  
AAAAATTTTGAATTAAAAAATAGGAGATAAAGTACTTAAAAGAAATGAAACAGGCCACAAATTAGACCCA  
GTATATTTAGGACCATATATAGTAGAAAAAATAGAAGATAATGATAACATTTACATTAAAGATAGTAAGA  
ATAAGAAACAAAAAGAACATAAGGATAGGTTACAAATATATAATCAATGAAACGTTTCATGAAAAAAG  
GGTCTGATCAACCTAAACAAAAAATGTTTAGCATAATGAAATATAAGCATAATGAAAAACAAATGGGA  
ATAAAATAAAGAAAATTTAAATTCTTCTAGGAAAGTCGAATGAAAAATATAAAGTTGAATGGAGTTAAGG

TATCTCAAATATATTCAAATAAAAAAAAAATATTGTATCAATGAACACAAATATTTAAAAACAAAAAAGAAAAG  
AGAGATAACACATTTTAATACACCTAATATATTTTACACATTCTTAATTACACTTTTTTTATACATTTTTTAAA  
ACACATAAAATAAGATACACAAAAAAATAACACAAAAAAATAATTTAAAAATTAATATTACTATTAATTTCA  
ACATTTTTTTACCGACTTTAACACTCTCTAAATATTGCGTAATTTCTTTAAACCGGTAGGTGTAGTATACCTA  
CCCTGCCAGTAATACAAATCAAGGGGTATAACAGTAAATACATACATTGTGACACTCAGTAATAATAATC  
ATAAATATACAAATACCCAAAAGACCACACTTAAACATATAAACACACACCAGCGCATATGTCATACGATCC  
ACCACTTACTCCCGACTAGAACCTCTTACTTGTTTTTTTTTTTTGTCTGGTGTGGCTGTTGAGTAGAGTCGACA  
GCAAGTAGTGCGGTTCAGTCGCGAGTTCGAGCCCTGCCAAGGGAACTTTTTTTTTATTAATTTATTTGGTGCT  
GGAATATGAGGGTTGACAGTAGGTATCCCGGCTAGTCGGGAGCTCGAGCCCCGACAAGGGAACCTCTTAC  
TTGTTTTATTAATTTATTTGGTGTTGGAATAAGAGGGTTCAGGGTATCCCCTAGTCGGGAGCTCCCGACTA  
GAACCTCTTACTTGTTTTTATATAAGTACTTATTGTTGGTGTGGCTGCTGAGTAGAGGGCGACAGCAAGTGGT  
GCGGTCNGTCGCGAGTTCGAGCCCTACCGGGGAAAGTNTTNTTATTTTTATACCCTGAACCCATTAAAAAT  
GGGTATAAGGGTATATTGTATTTGTGCAAAATCCAAATGTATGTAACAGGCAGAAGGAAGCATCTCCGAC  
CCCATAAAGTATATATATTCTTGATCAGCACCAATAGCCGAGTCGATCTAGCCATGTCCGTCTGTCCGTCC  
GTCCGTCCGTCCGTCCGTCCGTATGTATGAACGCAAGGATCTCAGAACCTATAAGAGCTAGAGACTTGAA  
ATTTTAGATGTAGGTGCTCCTAGTTCCCGCGCAGATCGAGTTTGTTCGATAATCGATAACTTACTCCGTT  
TCCAAGCAATCGATAAAAAATCGATATCGACATCCTTTTTTTTTTTAGCAAATTGGGTAAATAATAAGAGCTA  
GAGCCACCAAACATGATATGTTGCTTCTAGAATATTATAGATATTTCAAGTATCTTTCATTTTCATACCTATC  
GCCACCTCCCCGCTACCACCCCAGAGCTATAAATCAAGTTAATAACCCAACTTTTATTGCCAACCAATTTA  
AACCACAATTTAAATGCAATTGACTTTTTTCAAGAATACACAAATATTCTATGGTACAATAAGATATACTGTA  
GAAAATTTTCATAAAGATCGGTAAAGAAAAACCAAAGTTATATGCAACTGCGCAATTGAATGGGGCAGCA  
GCTTTAAGAATTTCTGTATACATGTACACACACACATTCATGCGCGTCTGCTTCGCATTCTAACAGCATGG  
TAATTGCATCTTTTTTTTTTGTAAATGTTATTTTAGTTCCTTTTTTTTATCATAAGTACTTAATTGTTGGTGTGGCT  
GCTGAGTAGAGGCATAGCAAGTGGTGCGGTCTGTGCGAGTTCGAGCCCTACCGGGGAAAGTATTTTTTTT  
TTTTTTTTTTGCTGGTGTGGCTGTTGAGTAGAGTCGACAGCAAGTAATGCGGTCAGTTGCGAGTTCGAGCC  
CTGCCAAGGGAACTTTTTTTTTATTAATTTATTTGGTGTTGGAATAAGAGGGTTCAGGGTATCCCCTAGTCG  
GGAGCTCCCGACTAGAACCTCTTACTTGTTTTTTT

>160\_rnd-1\_family-274\_\_LTR\_\_Pao

TTACATACGTTGGCCCACATTTTCGAGACCTCTTTACCGCAATTTACGTAAATAATCCTAGGTTATCAGAGG  
TCGAGAAATTATTCCATCTCAATGCGAAAACCANCGGTGAGGCTCAGGCGATTGTATCGAAGTCACCTTT  
GACTAACGATGGCTTCCGATCAGCCTGGGCCAATCTGACTGAGCGTTTTGAGAACCGAAAATTGTTAGTC  
AACAGCCAGCTCAAGATTCTTTTCAACCTGCAGCCAATCTCCCAAGAGTCTGGAACGGCAATTAAGGAAC  
TTCAGAGCACCATTCAAGGTTGCTTAACAGCTCTGGAGATATCCGAAATCAACATAGAAAACCTGGGACTG  
TATCCTCGTGTTCTTATGTTCTCCTCAAATTACCCAAATTAACACTCTCCTTATGGGAACAGTCCATCTCCAG  
AAAAAACGACATCTCATCTTGGCTTGAGATGAACGCCTTTCTCTTAGAACGCTATCGCACTCTAGAAGCGA  
TAGAAGAGCTTAAGCCAAGCGCAAATACTCCGGCGCACTCCAGAATTGTTTCGNACAGAACCTCCTACCAC  
TAGAAGGCTTAACCTCATTGAGAATAAGGTCGCTAACAAGCCGCAAGCCTGCCAATTGTGCTCCAGGGAG  
AATCACCTATCCGTCTGTGCCACGATTTCTCAAATGCCCCGTCAGCGAACGGGCAACTTACATCAAACA  
GCAAAAACCTATGTTTGAAGTGTTCGCTAGGGGTCATCAGTTAAGGGATTGCACAAGTGCTCACAATTGTT  
TTACGTGCAAGGGTCGTCACAATACGCTCTTGCATCGTAGTGACATTTACAAATTGGGGCCCTACGGTAGTC  
TCGATGCCACAAGCAACAGCTCCCTCCAATCAATCCATACAGTCCACTCCATCCCAACAAACGAATGTTT  
ACAATTATGTTGCAATTAACACCCACGGTGTTCTCCTAAGCACGGCTGTTATATATGTTGCGCATTGTTGGT  
GTAAATTATACAGCTCGTGCACTGATCGACTCGGGATCAGAAGCAACATTTATTTCCGAGCGACTCTTCCA  
CCTGATAAAGCTGCCGTACAAATCCGTACAGGCACAAGTATCGGGATTAAATCAAGCTGTTGCAGCCCAG  
CCTCGCAAGCTCTGCCATTTCAATATTGGCTCTCCTTCAAAGCCTCGTATCCAAATCGAGGCATCAGCCTA  
CGTCCTACCACATTTGGCAGGGGAATCTACCATCATGTTTCGATCCCCCAAAGTTTATTGACAACCCTGCCAA  
AACTCCAGTTAGCGGACCCTAATTTCCACAAGAGTTCGCAGATAGATGTGCTGATTGGCGCTGATATCCTA  
CCGTCCATACTAACGGGCGGGCTCCCGTCCTAATATATGTGGCACGTTGCTGGGCCAGGAACTATTTTCGG  
GTGGATTTTAACAGGCCCCGGTTTCAAAGACCGCATCCACCGCAATCTCGTCATTCTCGACTCGAATATCTG  
TCTCTCAAGAAGAGCAATTAGACGTCATTCTCACAAAATTTTGGGAGGTGGAGGACATTCCAGTCAAACCT  
GGTAAAGAGCTCCGACTCCTTCTGTGAGAGTAATTTTCATCCGAACAACAAGGAACGAGAATGGCAGA  
TATGTAGTCACCCTACCTTTCCGGGAACCTAATCACATAGACTTAGGACATTCAAGATCTATCGCACTAGC  
TCAGTTTCTAAAGAACGAGAATCGTTTAAAAAGAAACCCTCCTTTGAAAGAGCAGTACGACTCCGTGATT  
CGGGAGTATTTTCGACTTAGGTCATATGACACAAGTCTCTCAAACAGCAACCCCAATAATTTTTTACCTGCC

GCATCATGCTGTTTTTAAGCCCGACAGCACCACAACAAAGGTTTCGCGTTGTGTTTTAACGCCTCCAGCCCGT  
CCTCCAATGGCAAAAGTCTAAATGATATCCTACACACGGGACCAGTACTCCAATCCGATCTGACGATTCA  
GATACTAAAGTGGCGATTCTACCGCTACGTTTTCAATGCCGATATAACCAAGATGTATCGGCAAATCCAG  
GTCGATCCAAGACATACGCCCTACCAACGAATACTATTTTCGCAATGAGAACGAAGAACTTTGCGACTTCG  
AACTCAATACAGTTACCTTTGGGGTAAACTGTGCCCCATACCTCGCAATCCGGGTCTCCGTCAACTTGCT  
CGTGATATACGAGAACAATGTCCCATCGCATCCGATATAATTGAAAATTATATGTATGTGCGATGATGTTCT  
AGCAGGGGCACACACGAAGCAACAAGCGATTTTCAGCCATTGCAGAACTCCGCATGGCACTCGACAGAGC  
TGGGTTCCCTCTGAGAAAAGTGGACATCCAACACAAAGGAGGTGTTAAAAGGAATACCAAGGGACCACTT  
ACTGTGTGCGGATTTCTTAGAAAATCGAAGAGGCCAGCGTCGCTAAAACGCTAGGCATTCGATGGCAAGCC  
ACAACAGACCAGTTTTTTCTTTGCTCCGTCCAAAATGGTATCTCAGCCTTCGCTCACTAAACGTGAAGTACT  
ATCACAGATTGCGAAATTGTTTCGATCCTGCTGGATGGCTAGCACCTGTGATAGTTTCGAGCAAAGATTTTCA  
TGCAAGAGATCTGGCTCCAAGAACTGGGGTGGGATGATTCCCTGCCGGAAGATCTCGTTCAACGTTGGCA  
CGACTTCCTAACCGACTATCCGTCTCTCGAAGAGATCCGTATCCCAAGATGGGTTCGATTTTCAGCAAAAAGG  
CAAAGGTGCAGTTTCACGGCTTCTGCGACGCGTCCAGCGCGCATATGGTGCTGCACTTTATTTGCGCGTC  
GAGATAAACGGATGCATCTCCACTCATCTTCTCGCGGCAAAAACGAGAGTCGCGCCAGTTAAGACGGTAT  
CACTACCACGCTTAGAGCTGTGTGGCGCCGTTCTTCTTTCCGAGCTCACCACGGCTCTTATTCCTCAGCTCC  
CCATCCAGAGTAGAGAAAATTTCAATTGGACAGATTCCACTATTGTTCTTGCTGGTTGGATAAGCCTCCA  
TGCAAATGGTCTACCTTTGTGGCTAACCAGGGTAGCCAAGATAACATCAACCAATGGCAAATGGTCCCATG  
TTCGATCCGAACATAACCCAGCTGACTTAGCTAGTCGGGGGGTTTCTCCTCGGGACCTATTGGGCAGCACT  
TTGTGGTGGCATGGACCGGAATGGTTACAACTACCACAAAACCAATGGCCAGTTCCTGTTACGGTGCTTG  
AGACAGATATTGAACAACGCGCAGTGAAGTGCAATGTCTCACGGCTACCCTCCTATAACTTTCTGGAACG  
ATTCTCCGGATTCGACAAGGCATTGCGAGTTATCGCATATGTCTGTGCTTTATCCAGCGCTGTAGAAATC  
CAGCGATCCACCTCCCCGCCGAGCCCCGTAATGAAGAACTTACGAGAGTCCAGTTCCTACTTATCGAGTAT  
ACTCAACGCCAAGCTTATCCTAAGGAGTATAGCTGTTTGCTCGATAAGAAGCAAATTCAAGGATCAAGCA  
GCATTTCGCAACTTAAACCCTTTTCATCGATCAAAGGGGTATTCTGCGATCCTGTGGACGGGTGAGAGCGTC  
AACCTCGTTAGGCTATGATGAGCGACACCCCATAAATCATTCCGGCCAATTGTGATTTTTTCACGCCTCCTGG  
TCCGATTTACCCACCTCATTTGTTTTACGGAGGCAATCAGTTGGTAATGCGCCTCATAAGAGCCAAATAC  
TGGATCCCAAAGCTCAAGGTCTGTTAAATCTACCGTAAGCTCCTGCAAGGTCTGTGTAATACACCGTC  
GGCGACTCCAGACCCAACCTTATGGGCGAGCTCCCAAGGGCGAGATCAACCTTTTCCCGACCCTTCGCACA  
CACGGGTGTAGACTTTGCCGGACCTTTCGATATTAAGAGCTACGTTGGATCGAGCATGCAAAATTACCAA  
GGGTTATGTCTGTGTCTTCGTTTGTTCAGCACGAAAGCAATCCATTTAGAAGCCACCGCAGGTCTTACGA  
CGGAGAGTTNTTTTCTGGCCGCATTTTCGCGATTTATAGCGAGACGTGGGCCTTCCCCAACAGATGTACTCA  
GATAATGGGAAAACATTTGTGGGAGCCTCATCCGTTCTTTTCGAGAGATTTCTTGCAAGCGACCAAGGAGC  
TCATCTTATCCAAGCACGGCCGTCAAAACTTGTGTTGGNAATTTANNCTCCTCGCGCNCCGCACNTNNGC  
GGNCTNTGGGAAGCAGCNGTGAAGAGCNGCGAAGCACCCTTCTATCGNTCCGCCGGATCGTCCNCAATA  
TACATTCGAGGAGTTTCGCGACCCTNGTCTGCCACATAGCGTCGATAATTAATTCCAGGCCATTGTTTCCT  
CTTTCGGAAGATCCGGCAGATCTAGATGTGCTCACTCCAGCTCATTTCTTGATTGGTGGACCCAGCTCATC  
GTTCTTTGAACCTGATGTGACGCACCTTCAATTCAATCGTCTGGATGGTTGGCAACGCGTAACGTACCTCC  
AACAACTGTTTTGGTCTCGCTGGCGTGAAGAATACTTAACACTGCTTCAGCAGCGCTCCAAATGGCGTACT  
CCGAAACCAGGCCTACGCGTCAACGACATAGTCCTCGTAAAGGATGAAAATCTGCCAATAAAATGAATGGC  
GCCTTGGCCGAGTCCAGCTGGCTTGCNCAGGCACAGATGACAAGGTCCGCGTAGTGACGTGCTTACCGC  
TCGCGGTGTATCCGAAGGCCAATAGCCAAATTGGTCCTTCTTCTACTAAGGCCAAATAGCACCACCGACT  
AATCCTTAAAAGCAACTAATCCCTCTTTCAAAAACAAAACCATCACATAATAACACCTGTCCTACATCTTA  
TTCTCCAGTTCACCTCTGTAGAGAACCAGCATGGCACCGTCAACGAAGGCATCCAATCAACGTCAAGG  
AACGGACTCTTTTAGATGCCGGGTGTGTAGAGGCATCCATGCGCTACGCAAGTGTGACGCGCTTCTTGAAG  
CTCACGCCCCGAGAAGCGTTCCCGAGCCGTGTTAATTAACAAATATTGCTCCAACCTGCCTGGCTCATCAGCA  
TTCAGGGGAATCATGCCGCAGTGGAGCCAAGTGCAAAATTTGCAAAAAGGACCACCACATCTTACTCCAC  
ATGCGTGATCCCCGTAGCTCTCGACACTCTCGGTCAGACAACAGGCCCAAGAAGAGCTTCTGGCCCCCT  
CGCCCTCCAGCGGCACATCACCCTCAAGCCCGATACGTGCTACTATACGGACGTGCTTACGTCCCTTCTC  
CAGCACAAGGGGGTCAGTATATTGCCACCGCCATAGTACTGCTCGACACCGGAAAAAAGACCCTTGGGC  
TCTGATCGATCCATGTTGTTTCAGTAAGCCGCATTAATGCAACCGTGGCAAGGGCCTATGGCCTTCCGTCA  
CACGCATTGGCGCAGAAGGAGCGTGCACAGCCGTGCTACGCTCCAAGACAACCTCAGATGTCTCGAGAAGT  
GGTCTTCGTGGCTGACCCGCAACTCAGCTGCATAACTCCAGCCCGAGCCATCAGAGCGGACATGAAGGAC  
CCGTTTCAGCAACGTGCGCTTTGGCGGACAACGAATGGTTCCGTCCATCTCCAGTCCCTTTGGTACTCGGCGC

CGACGTCTACCCAGACAAAATCCTACCAGGTAACCTCCCGAGCCAAGGCGGTCTGCCGATGGCTCAAAAT  
ACCAAGTTTGGATGGATACTCTCTGGCACATGCACGCAATAGGAATTCTTGCAATCTGCATATTGCCAGGG  
GGGGGAGAATGTTTCATGCCAGTTCAGTGCTAGTGTGAACACAGCATTGACTTAGCCTCACTCAGCGTGAG  
CGAGTCACTCAGTGAGACAGACTCACTCACTGAGAGAGACTCATTCTACTAAGTCGATCCCAGATGCGCTC  
AGCACTCTCCTTGTGGTCTCCTTTCCACCTCCATCACTCCAACCAATATATGTTAAATCACTTAACCAGCA  
GAGTCTGTTACATGCAGCAGAACTTCTAATAAACAACAATAATCAAGGATTATTTATCTGACGCCACCC  
CCACAAACAGGAATATCCGTTAAAAATTAAGTTGTATGAAAACACATTAAGTTTTTGAATGAAAAAACA  
TTATGTTTATCAAGATATTTTGACAAAACCTCGGCATTTATTAGTTTTACCATGCTCCCCATATATATTCAA  
ATCCTATAAAGATCGGACCCTATATCATATAGCTGCCATAGAAACGATCGGTGCGAAAATTAAGTTGTTG  
TATGAAAAAACATATTGTTTATCAAGATATCTTGACCAAACCTCTGCATTTATTAGTTTTATTTTTCTCCTTA  
TATATTTGCAAAATCGTATTAAGATCGGACCCTATGTTCATATGGCTGCCATAGGAACGATCGGTAGAAA  
ATTAAGTTGTTGTATGAAAAACATTTTGTTTTTCAAGATATCTTGACCAAACCTCGGCATTTATTAGGTTTAC  
TATTCTCCTAATATATATGCAAAATCATTTTAAGATCGGACCCTATATCATATAGCTGCCACAGGAACGA  
TCGGTGCAGAAAATTAAGTTGTTATATGAAAAAATATATTGTTTATCAAGATAGTTTGACCAAACCTCTGCATT  
TATTAGCTTAACTTTACTCCTCATATACATTGAAAATCCTATTGACATCGGACCCTATATCATATAGGTG  
CCATAGAAACGATCGGTGCGAAAATTAAGTTGTTGAATGAAAAACATATTGTTTATCAAGATATCTTGACC  
AAACTCTGTATTTATTAGTTTAACTATTCTCCTAATATATTTGCAAAATCCTATTAAGATCGGACCCTATA  
TCATATAGCTGCC

>Ref\_dvir\_734

GGGAAAAAGGAAATGTACTACTTTTGAATTATTTTCAGATGGCAACTCTAAGTTATCCATCTGAGTAACAT  
GCTTGGAATTTTTGGGCACGCTGTGTTTGTTTTTACTACGCGCTATTGATGCGCGTAGCAGCGTGTGCCCTC  
TGTAATATTTAGCATTTGAGTTGCCTTTTTGGCTACGGCTGAGTGGAGGAGAAACATATTCAGTAGAATAC  
TCTAGTAAGTAATTTGTAGTTTCGATAGCATCCTTGGTGCTAAAATTTAAATAGCTTTCCAAGGCTGCTTG  
AATGTCATGACTGACGCATTTGCTTAGTAAACAGATAGCTTCTGGGTCCGATAATAGGCATTTTATTATAG  
TCGCCTTATCTATAGTACGGCTGAAAGCCATTTTTGAGTATATGAATTTTTCGCTGATTTTATCAATATTGA  
ATGCAGTTATCCGATTTGGAGTAAATCTGCTATATTCTGAATTTTTAATGAATTGTATGTTTCGAGAGTTTG  
TTGTAAGCTCCTTCACTCTATGGCCGTATCTCAGCATATTACTTTTTTTACTCATTTTCGAGTATCATTGGCG  
TCTGAGGAGCTACTAGCCGTTTAACTAGCTAGCGTCCTAGTGGCTGTTCCGTGCAATTTGGTTGCAGGAT  
ATGCATTAATTTTATTTTTGGCCACTATTTTCAAAGTAGTTCAACTACTTGGTCCAATTTTCGTGGTCATTT  
GCATAATTGCAGCCATGTTGCTATTTAAAGCATCCAATGGCTGCATTATTGACCGGCTCTTGGCTTTCTTTT  
TGTTGCCGTTGCTTATTTTTCTGTTGCTTTTGCTGCTGCTGCTGCTGATGATGACTAGCGCCTGTTGTGTTTG  
AAGCATTCGCTGCTCCTGATTGATTTTTCTGGCGCTCTTCCTCTTGTTCCATCTGAAGTTTCTTCTGGAAC  
TTAGGAGGTGTTGCATGGCCGGATTATGCATCCGACCAGTATTGAACTCGCCCGCTGGTCACCTGACCTAT  
AAGTCATCGTCGAGTTGGGCAATGTTTGCTTTGCATCTTCTGGTTCTTCTGCTGCTGATGTTGTTTACGGTC  
CTGGTTGGACACCACGTTTTGCGTTCCATGTTGACGCTTATTGACTGATGGCTGCTTGTGCTCGTGCCTGGA  
TGGGCATGACTCGTGCCCGGTTTGCTGATAGCCTAGCTCGCTCATCTTTAAAGCTTTGCCAGCCTTTATA  
ATTGGCTACATGCTGGCCCCTGACAATTGGCCCGCACTTTGAAGGGCTCGCCTCTTGTCTTGGAGCATGTGCG  
TGGTCGGGTGTCCTTGTCCGCATTTAAGGCATACAAATGGTCGTCGGCAATAGTTTTTACTATGCCCGTAT  
GCCTGGCAACGGTGGCACTGAACAGGATCAGTGCCTTCCGCTGCCTCTCCACTTTGATTTTCTGGCTGCC  
AAGTTGTTTCAGTTCCAGTATCTTAGTGTTGTTCTCGTTTTTCCACTAGCTCAATTTCGAACGTATTGATCG  
GTTTGGCAGTGAAGCGTTGTTTTATCACGCCACATACCTAACCTCATGCCCCAATCTTCGCAATTCCATG  
CGTACCCAGTCGCATGGAGTTGTGTGGTGTAATGGCGAATAATGATTCTAAATCCGCGCTCATTGCGCAT  
TTGATGGGTGTGCCGGTGAACATTAGAGGCATCAAGCAACGCAATTGTTGCATTGTATGCCTCAATGTCCG  
CACATTGCACTCTCACACCACCTGTCTGCGTACTTTTAGTAGCAAACCTTATTAGCACCCACATTATTTGAG  
ATATCTTTGATAATTCTTTGAATATCATCAATATTGGGCAGGTATATGGTGGGCACCTTGACCCGTTGAGC  
TAGATTCACTGCATTGTCTGACCAGAGATTACATTTGGATTGCAATCTGTTGCCTCGTCTTCAACTTCCAT  
GATGTCAATGTCATCACTGTCCTCGTTGTTGTTGTCGTTAGCAACGAATGTAGCATTGTTAGTTTTGCCAAC  
ATTCGTGCCATTATTTGTCTGCGTGCTCTTTCTAGCTTTAGCTGCTGGTATATTATTGTCGCTTGACAGATT  
GTCGGATACTTTATTGGCTGTATTTGATTTAAAGAAATCAGAATACGAAGGAGTATCCCTGACACTGTCTG  
CGTTCGTAATATACTCAGCGTATGCTAATAGTAGTGCACGCTTGTCCTCTTATTCGCTGGCATAGTTGGT  
GAGAATTTGCGCTTAATAGGTCGTTAATGACCGTATTGGCTTTGGGTGATCCACAGATTCTAGTACCCAA  
CATATCCTCATTTATTGGCAGCGATTGTTGCCCACTCGCCTCCAGTTCATTTTCTGAAACTTGACATAATTT  
AGCTGGCATCATTTCCCGCATAATTATTAGGAATTAATTGACTAGCCGATGGAGCAGCATCGGCATTATTTT  
TATTAATTTCTCCTCATTTCTTGGCTATGTGTGACACAGATAATTTTCTGAGTCAGAATTGGTTGGGCTATCA

GCAAGCATGTTGCTAATGAACTTGCGCTCTAACAACATGTTGCTGTAGCCCCATACTGTGCTCTCAACAT  
TTTGTTCGCAGCTCGAGACGAACATGTTGCCATGATCGCTCTCACTACGTTTCATAGCTGCTGCTGCTGCTG  
AATTTGCTCGTGTTTCGATGCCGCTCTGCTGCCGACACTCAAACGCTCGATTGGCGCTTCTGCCGACGCAAG  
CGCCGACAGCGACTGAGCCGTAGAGAGCATTGGCGCTCTCTTGTGCTTCGGCTTCGGCTTTCTCCGTTTCA  
GCTGGTGTGATGTTGTTGCTGCTGCTTGGGTAGCTGGTGCCGTTGCTGGTGTGAGCTGTAAGCTGCTGC  
TTGCTGATGCTGCAAGCTGCAGCTGGTATTGGTGCGCCAAATGGCGACATTTTCAGCAACAGGTGCCGGG  
GGGTATGGGGGGGGGCTATAGCTTTTGTAGCTTTGGATGCAGCAATGGCCGCCGGCTTGGACGCCGCCTT  
TTCGCGCATTTTTTTTCCCTATTACTTGTCTATGTACTTGCCCTTTTTGGCCTTATATACATATCATTATGTA  
TTATATTTATGAGTTTTTTTTTGGCGTAGTTTTCCCTCGCTGTGCTCAGGTATCTCGTCTGTGATGGCTTCTT  
TTGTTAATAGAATTAACAATATGTTGCTGCTCTGCTGTATATAAGTATATATACAGCACACAGGTTAGGTT  
TTATATATTTAATTTTTATTTATTTATTTATTTATTTATTTAGCATTAAAAATGCTGATTGGCCCGTATTT  
AATTTGTTAGAATACTTTATTTTATTAGTTTTTCACTTTTTCTCTCCATTGTGGCTTTTATTTAAATTTTTTT  
TTTTTTTTTTTGAATTTATTTTATGCAATTAATAAATGCTGATTGGCAGTTTATTTGTTTAAACTTTATTACTT  
TTAATTGTTTGGCACAAGCATTTTATTTTATTTATTTTATTTAATTTAATTTTAAATTTACTGGCAGAAATAA  
AGACACTTGTAATAAATTTTTTAGTTGTTTCGTCTGGTTGGCCGACCGGGCGCTGTCCGCAAACACGTCCGC  
TCGCCACGACCGCCACAGAGAGATTTTTATTGTTGCTCATTTCTACATATAGTTTTGCAAACAGAAATTTT  
AGAACATTTATGGGAGCACTTAAACCTATGCAACGATCTCCAGTTTGCAAGGTGGAGAGGGACATGACG  
GGGAGATACATTTAACATTTAATCTCGACTGACCTACATTTAAACATAACATAACATAACAGACTCTGTT  
CGATTAACATTATTGTCGTAGGTCAGTTCGCTGGGGGAAATTTATGCACGATCAGCTGGCAATGCTGTGCT  
GTGAATGGCAAGAATAACATAAGTATCAATTGGGCACGCTAAGTACATGTGAGTGGACAAAAATTTTAAA  
TTTAAACAATTTTATGGCTAAATAATCTAATTAATTAATTTATTTTATATCGCACCGCCTTACGATGCGCTGG  
CCGCCTGCCTCTGGCCTTGCGGTGGACAATTGGCCTCCACCTGGTACCTGGCCGGCTTATTGTCGCATAAA  
TTTGCAATTTGCATTGCGTGATGGCTGCCGCTACATCTGTTGGAAGTTGCATCGCTTTGGAAGGGCATAAC  
TTCAGCTGCTGGAGCGGATGACTGGCAATGAGCAACACCATCCACACACCCAGGATGCATGGATAGCGGA  
TCGCCGTGTTATCGCGCCTGTTTTTGCCGGAGGGCGGAGTGATATGCAGCCTGCGCTGTATCATTTTTTGCA  
CGTACGGGTGGCGCTGTGTCTGGCCACTTCGGCGTCGAGTGATGACGTTTCGCCGGCTTCCGTGTGTGCT  
GAGCAGGCCGCTGACGCATTCGCTGGTCCATTTGTGCAGGTAAGTGGATACATGGCATTTTTTGCAATTTG  
CATTTTTTAACATTTCTGTATTGCTTGCAGGTACGGCGTCTGCTGGGCTGGATAGATGGCCTCTGGGTAGT  
CATCCTTCGCCTGCATCTTCGTGCGCCGCTCCAATTTGGCAGTTTGTGCCATTTTCAGCTGGATTTGGTGGCC  
ATTTATTTGCCGTAGTGGACCACCGTTTCGTGCGGTGCCGTGTTGTGCAAGATGCATGCCCGGCTGGGCATT  
CTGCTCAATTTGGAGTCGCTGCGTCTGGCCAAGGGAGGCACCGTTTTTGACCACAATGTCCCCATTGCTGGA  
GAAGCTGCTGCCCCTTTAAGGACTGGATGATCAATAAGGGGCTGTGCTTTTTAGTGCCAAAGGGAGTCCA  
GTGAGGACGCCGTCGACTGATGCTGGTTGTGTCTGCCTGTACCCAGGTACAGATTGTGCATTTTGCGGCTC  
GTGCTTGTGCCCCGTAGGTGGGCGTGGCGGCTGCCGTGCGGCTGCTGCTGCACGTTCTGCTGCTCCCATAGGA  
GGGGCTGCAGATTTGGCGGGCGTTGCTGGTGACCATAGGAGGCATTGGAGGCTCCTATTGACCATCGCTG  
CTGTGCTTGTGCCCCATAGGAGAGGCTGCGGATTTAGCGGCTGCTGCTGGTGCCCAAATAAGGGCGTG  
GTGGATGCCGTCGGCTGTTGCTGCGTGCTCAGCTGTCCCCATAGCACGGACCGAGGATTTTGCGGCTGCTG  
CTGGTGTCCATAGGCGGCACTGGAGGCTCCTATTGACCATCGCTGCTGTGCCTGCTGCCCCCATAGACGAG  
GCTGCAGATTTTGCGGCTGCTGCTGGTGCCAGAGGAGGGCTGGTGGATGCCGTCGGCTGTTGCTGCATG  
CTCGGCTGCCCTAGCACGGACTGAGGATTTTGCGGCTGCTGCTGGTGACCATAGGCGGCACTGGAGGCTC  
CAATTGACCATCGCTGCTGTTCTTGCTGCTCCCATAGGAGAGGCTGCGGATTTTGCGGCTGCTGCTGGTGA  
CCATAGGCGGCACTGGAGGCTCCAATTGACCATCGCTGCTGTTCTTGCTGCTCCCATAGGGGAGGCTGCG  
GATTTTGCGGCTGCTGCTGGTGCCCAAATGAGGGCGTGGTGGATGCCGTCGGCTGTTGCTGCATGCTCGGC  
TGTCGCCCATAGCACGGACTGAGGATTTTGCGGCTGCTGCTGGTGACCATAGGAGGCATTGGAGGCTCCAA  
TTGACCATCGCTGCTGTTCTTGCTGCTCCCATAGGCGAGGCTGCGGATTTTGCGGCTGCTGCTGGTGACCA  
TAGGCGGCACTGGAGGCTCCTATTGACCATCGCTGCTGGTTCTGCTGCTCCCATAGGAGAGGCTGCGGATT  
TTGCGGCTGCTGCTGGTGCCCAAATAAGGGCGTGGTGGATGCCGTCGGCTGCTGCTTCGCCGAATGGAGT  
TGCTGGTGTGTTGGATGCCCTTCAGGCCGCTGGATAGGCCAATATTGGGTAAGTGAAGTCTGGAATGTATT  
CAGATTTGAATTAGAGTTTATGTCCGTGGTTCGAGTCCGAATTTGTGAGTTTGTATTGTTCTGTCCGACAGTG  
CTCGCTGTCAGTTAGTGGTTGCTTGGCTTCGTAATTGTTACCTAGTTGCATCATACCCTGCAACAGGTTCTC  
AAGCATAAGTTTTTCGTGCGGGTCCGTATTATCTACGTCCCGTACAAGTTTTTTCTCCAAGACGTTGAAGA  
TATGTTTCGACTAGTGGGTGAGCTGGCTGCAGATTGTCAATTTCTAGGTCATCAGTCAGTTGATTTTGTG  
ACATTGTGCATGAGTGTCTGTTGAGTAGTTGGTAGTTGAACTTTGTTGTCTTTTGGTGTCCATTCTAAGTTG  
GACACCTGAGTAGACTGCCAATTAGTTTTGGGCACGCTATATTTATTTTTACTACGCACTATAGGTGCGCG

TAGCAGCGTGTGCCCTCTATATTGTTTGACATATGATTTGCCTTTTTGGCTACGGCTGCGTG GGGGAGTAC  
CATGTTGATTATGAGTGAATAATTCATTTAAAAATTTCGATTGCATCCTCAGAGTTGAAGTTAAATTCAAAC  
TCCAAGGCTGCTTGCATATCATTATATATATGATTGTTTATTTTCGTCGATAGATTCTGTATATTCTAGATAG  
CGTTTTTTAATATTCGCCTTATTAGTGGGCTGGCCGATAGCCAGTTGTTGATCATTGGCATAATTGCCGATG  
TTTGCAAAGTTAAACGCAGGTAGCCGATTACCTTGTTTTAAGGGATAGGTTGCGGCTCTGCCTGTTTCTAA  
ATTAATGACTGTTTGTGTTCCGAGAGTTTTTTGTGTACTCCCTCACTCGCTGGCCGCATATAAGACTGGC  
CCTTGCAATACTCACCTCAAGTAGCATTGCCCCCTGAGCAGCTACTACCAGTTAAACTAAGCTAGCGTCCT  
AGTG

>9\_rnd-1\_family-267\_\_LTR\_\_Gypsy

ACTAAGCAACTAAGACGAGTTGCATGAGAGGCAAACCGCCGCTTATGCCTACGAGGGAATNCTAAGCAA  
CTAAGACGAGTTGCATGAGAGGCAAACCGCCGCTTATGCCTACGAGGGAATACTAAGCAACTAAGACGA  
GTCGCATGAGAGGCAAACCGCCGCTTATGCCTACGAGGGAATACTAAGCAACTAAGACGAGTTGCATGA  
GAGGCAAACCGCCGCTTATGCCTACGAGGGAATACTAAGCAACTAAGACGAGTTGCATGAGAGGCAAAC  
CGCCCCCTTATGCCTACGTGGGAAGAAGAAGAAGAAGACCCTATAACAACAGTACCGGCAGCGCCCAACA  
TATTAAATTAAATAGTAATAAATAAACTTAAAAATTGTAATGCCCCGACGACAATTGAGTCGACCGGCAA  
GACGTTTGGCCNGTACAGCCATTCGAAACAATAGGTAGGAAAAATACAGATTGTAAAAAAAATTTTTAA  
GATGCGTTTTAAGCAGAAAACAACAAGCAAAAACAAACCCGACTTGTAACAATAAAAGCATCAAATT  
CAATAAATATATGTAATAAAACCTCAAATGAACGATACAAACAACAACCTTGTCTTGTAAGTAACGAAA  
ACAAATTTAACATTACGCATTTGTAAATTTTTTAAGATAATTCCTTTTTAATTTTATGTATGATCCCATACT  
ATATATGAATATTAATGATACAAAAGAGGAAANTAAAAGTNNTAATTCGTTCAAGTTGGAATANAAAGAA  
ATAATGCGCTCNGCTTGCTCATTAGGTAATTCAAAATTATGATCAAGAATTAGCATGATCGAGGACAAG  
ATTAACAAAGTATATAACGACTATACAGACTTTCGTATGCGAGCCATACAAATTTTGCAAAGGCATAGAG  
AATTCATACCAGTATATGAGTTCGAATCCGAATATATAGAAACATTTCGGCACAGTGACAAGTCCACTCTA  
TTCATGTTCTAAAATAGAGNGCGGAATAATCTTGTCTACACTACCCTACGTCAAAAATAAAAAACAATTATTG  
ACGAGCATCCGATTCTAGGGCAGACAACAATTGTCTTAGTACGTCTGCATAGGTAGTAGTCAAATCAAAA  
AGCAAGAGTATTTATATAGGAATATGGGGGAAAACAATCAAAGGCAGATGATAACACTGCCAATGTAGT  
TAACGTAGTAGAAGTCGTAGACACCACTCCCCATGTGCAGTTAACAAACATACTGCTAATAATACTCATT  
GTAATAGCTTCAGTAAACATCCTTCTGAAGATTTATCTTCTTCATAAAAAATCACTGAGGAAGCGTTACAT  
GAGTCGAGCCAACGACTTAGACAAGGTCTAAGCCACTGCTTAAATAAAAATATTTAAGTAGCGGAAGTTTA  
CATGGACTGGTCCCAAATAGTAGAAAAGATAAAGCGGCATAGAGAAAATTTTTCGATAAATCATACAAGT  
GCCTTAATAAAAAGCGCACCAGTTTTTAAGACCCACCATAATTAACATACTGAGATCCTTGTATATGAGTAC  
AATGAAATCAGGAGTCTAGTTACCGAGTGTCAAAATAAACTGACAAGTTTACACAGAGTCCAAACTTCAG  
ACGTTTTTACAGCGTCTAAAGGGATAATCTGGTAAACTTAAATAAAAAGTATGATCTCCAGCTTTATCTACC  
ATCGGTGTAAATACACCGGTAACATTTGATAAGTCACTACTGACAAACGACCAAATAGAAGATACAAAA  
TTAGTAAACATGGCACAAACAGTTGTAGAATTTATCAAGCTAGCCACATCTCTGATACCAGAGTTTGACG  
GTAAGCCGGAATACTACAAAGTTTTCTAGATTCTTTGAATCTATTAGAAACCTTAAAAGGCACACATGA  
GCTAACGGCCATAAGCCTTATAAAAACAAAGCTAAAAGGCCATGCGAGAAATTTGATAAGTAATGAGCA  
GACAATTGCTGCAATCATTACGCAACTATCAAATGCAGTAAAAGGAGAATCGGTAGAAGTTGTATCTGCT  
AAGCTTCTTAATTTGCAACAGAAAAATAAAACGGCTAACCAATACACCCAAGAGGTGGAAAAACTGGCA  
AAGGCCCTTGAAGGCGCCTATATCAGTGAAGGTCTAAGCCAATCACTNGCAAACAAATACAGCACTACAA  
CAGCTGTAAAAGCTATGACCCAAAATTGTTCGATTGATAAGGTAAAACCTTATCATGCAGGCAGGCACATT  
CACAAATATGAATGATGCCGTATCCAAATTTGTCAATAGCTGCACGGAGATAACAGGTCAAAGTAACACT  
GTCCTGTATTATCGACGAGGTGCAAACAATAATAATAGAGGAGGCCGAGGTTATAATCGTGGCAGAAATT  
ACAACCACAACAATTATAACCGAGGCGGTAACAACAATAACAATAATTACAATAACCGTGGAGGAAGAC  
GAGGCCAAAATAGAGGAAGAGGCCGAGGTAACCTCAACCAAGGTTATAATAGTAACAATGTGAGAATGG  
CGAAAATACGCCGGAACCTCTCAGAACCCTTTAGGAAACAACCAGTAAATGTAAAGGTTCAATCCATC  
AATTACAGTCTTAATATATTTGTCACTTTTTATAATCATTCAACTGAAAATAAACTCACATTCCTAATAGAT  
ACTGGTGCAGATATCTCACTTTTTAAAAATAAATTCAGACAATTTCAAAAATTCAAGAAGAAAAAATTATAA  
ACATCCAAGGCATAGGCCAAGGTGTAATAAAATCTCAAGGAACAACCTTCAATAGAACTTCAATCCACAAA  
ATATATTATTCCACACGAATTTCAATTTAGTAGATTCCGATTTTTCAATACCGTGTGATGGAATAATAGGCA  
TTGATTTTATTAAAAAATTCATTTGTCAATTAGATTTCAAACCAAGTGAAGACTGGTTTATAATTAGACCT  
CAAAATTTAAATTATCCAATTCATGTTCCGATAACATATAGTGCTGGCAACAACACAGTTCTCTTGCCAGC  
CAGATCCCAAGTAATTCGAAAAATAGACATTAATACAGTAAATGATTATATATTTGTTCCCTAATCAAGAA  
ATACATAATGGAATTTATGTTGCAAATACAATAGCAGCATCCAAACATGTATACATTCGCCTTCTAAACAC

AACTAATTTTCGACCAATTGGTCAAAGTAAACAAAATCCAATATGAAAATTTAACAGATTACGACATTCAT  
AGCACTACTCCAGAAAATAGAAGCGAACAAGTACTTTCAAATTTAAAGAAAAATTTTCCAGAACAAATTC  
AAAGTCAACTAACAGAATTATGCACCAAGTATAGTGATGTGTTTCGGACTGGAAACCGAACCAATAGCGAC  
AAATAATTTCTATAAACAAACATTAAGACTTAAAGATGATGAACCCATTTATATTAATAAACTACAGAAGC  
CCGCATAGCCACGTTAAAGAAATTCAAAAACAAGTAGGGAAATTAATAAACGACAAAATCGTAGAACCG  
TCTGTATCCGAGTATAACAGCCCACTCTTGTTAGTTCCGAAAAAATCATTACCAAATTCGGAAGAAAAGA  
AATGGCGATTAGTAATTGACTATCGCCAAATCAACAAAACTACTTTCTGATAAATTCCCGCTCCCCAGAA  
TTGATGATATTCTAGACCAACTGGGCAGAGCTAAATACTTTTCATGCCTTGACTTAATGTCAGGTTTCCAC  
CAAATTGAACTTGAAGAAAATTCAAGAAATATAACATCTTTTTCAACGAGCAATGGCTCATATCGCTTCAC  
GCGATTACCATTTGGTCTTAAATAGCACCAAATTCATTTTCAGAGAATGATGACTATAGCATTCTCGGGTT  
TAGAACCTCCCAGGCATTCTTTTATATGGATGACTTAATGGTGATAGGATGTTCCGAAAAACACATGATT  
AAAACTTAACTGATGTTTTTAATGTATGTAGGAAATATAACCTAAAGTTGCATCCAGAAAAATGTTTCATT  
TTTCATGCATGAAGTGACATTTTTAGGTCACAAATGCACTGACAAAGGAGTATTGCCAGATGACAAGAAG  
TTTGACGTCATCAAAAATTATCCTGTCCCTCATGATGCGGACAGCGCGAGACGATTTGTAGCATTCTGCAA  
TTATTATCGTCGATTTATAAAAACTTCGCCGATTATTCACGGCACATACTAGATTATGTAAAAAGAATG  
TTCCTTTTGAATGGTCAAGTGAATGCCAAAACGCATTCCAATACCTTAAAGAAAAGCTTATGCACCCCA  
TTATTACAATATCCTGATTTTCGCAAAGAATTTTGCATTATAACAGATGCCAGTAAACAAGCTTGCGGAGC  
AGTTCTAACTCAGAACCGTGACGGAATTCAGCTCCCAATAGCTTATGCATCTCGTTTCATTTACAAAAGGGG  
AAAGCAATAAGAGCACAAACAGAACAGAGTTAGCGGCAATTCATTGGGCAATTACCCATTTTAGACCATA  
TATTTATGGCAAACATTTTACTATTAACCGGATCACAGACCATTGACATATCTTTTTTCTATGACTAATCC  
CAGTTCTAAATTAACTCGCATGCGGCTAGAGCTTGAAGAATACGACTTCACAGTAGAATACCTAAAGGGG  
AAAGATAATTTTCGTAGCAGACGCACTTTTCGCGTATTAATATAAAAAGAACTCAAAGATATGCAACATAAAG  
TCCTGAAAGTCACTACCAGGCGACAAAGTAGACAAAATAAAAACTGTACAGTAGAAAATTATGAACTTCT  
GCCAAGGCAAAGTCATAAAAAATGTATCCAAGCCCAACGTACATGAAGTCATTACAAATGATGAAGTACG  
AAAAGTAGTGACCTTGCGCATAACAGAATCTAAATGTTTATTTAAACATGGAAATAAAATTATCGCAAGA  
ATTGAAGTTAGCGATTTATATACCAATGGAATTCTCGACCTAGGTCAGTTCTTCCAAAGGCTCGAAAAAG  
AGGCCGGTATATTAATAAATCAGCCAACTCAAGGTGGCACCGAGCGAAAAGATCTTTGAATCAGTTTCAAT  
AGATTCTTTTAAAAATATGGGCAATGAAATATTAATAATCTTTAAGAGTAGCGCTACTCCAGCCGGTGACC  
CAAATAAAAGATGAAAAAGAGATACAACAAATATTGTCTACATACCATGACGACCCAATTCAAGGAGGT  
CATAGCGGCATAACAAGAACGTTAGCGAAAATAAAAAGACACTACTACTGGAAAAATATGACACGTCAT  
ATAAAAGAGTACGTACGTAGATGTCAAAAATGCCAAATGTCTAAAACAAAGACGCACACAAAACTCCT  
CTGACTCTCACAGAAACACCTGTGAATGCTTTTCGATATAGTGATAGTGGATACAGTTGGTCCGCTACCCAA  
ATCGGAAAATGGTAATGAATACATAGTCACATTAATATGCGACCTTACAAAATATTTAGTAGCCATTCCA  
ATAAAAAGCAAAAGCGCAAATAATGTGCGAAAAGCTATATTCGAAAATTTCTACTCAAGTTTGGTCCAA  
TGAAGACGTTTCATCTCGGACATGGGAACAGAGTATAAAAACCAGATTTTAACTGACTTATGCAAGTATTT  
GAAGATCAAGAATCTCACCTCTACTGCATATCATCATCAAACATTAGGGACAATAGAACGAAGTCATCGA  
ACTTTTAATGAATACATTCGTTTCATACATCTCTGCAGACAAATCTGATTGGGATGTCTGGGTTCAATATTT  
ACTTATTGCTTCAACACGACACCATCAGCAACGCATGAGTATTGTCCATACGAACTAGTATTTGGCAGACT  
ACCGAAACAGTTTCATAGATTTAAACAAAATAATTACATAGATCCTATTTATAATTTAGATGACTATTCTA  
AGGAAATAAAGTTTAGATTAGAAATAGCATACAAAAGAGCTAGAATTATGTTAGAAAAAGCCAAGGCTT  
ATAGGAAATTAGCATATGACGAAAAAAAAAAAAAACTTTGAATTAAGTAGGAGATAAAGTACTTATAA  
GAAACGAAACAGGGCACAAATTAGACCCAGTATATTTAGGACCATATATAGTAGAGAAAATAGAAGATA  
ATGACAACATTTTTATTAAAGATAGTAAAGATAAAAAACAAAAAGTTCATAAGAATAGATTAAAAATTT  
TTAATTCTTAATAAAAAAAATAAAAAAATATATGACGGCCTGATCAACCGAATGAAAAAAATTTTACA  
AATAAACGAATTATAAATTTTTTACCTTAAATAATTTTTGTATTTTTTATACTCCAACATTTAAAATTTCTTA  
TTATATAAAAAAATTTTCAATTTTTTACAAAAAANCANAATAATTAAGTTCATTTAATAACTACACATTCAT  
AATGTTACGTTATTTCTCTAAAAAGGGGGTGTAGTGCGTATATGCCCTTACAGAATACCCCGTACTTAAAC  
ATAAAGTATGCAGCACTTTGTTGCATACAATAACAATAATATAGTAAACGAGCCAGAGCCACATTATGT  
ATTGGCTCGGTCTCATATTACGCAGCGCGGTTCACTAGCCTCACTAGCTGACCGTTTATGCTTATGATGCA  
TATCCACGCTCCGTCTGAGCGCATTCCGTGAGCAATATATATGCTCACTAATACAGGCATATGCGAGCTA  
CTCACTCTCCCTCTCTTTGTAGCTGTAAACGAATAACAGCATAAGTATATATGTATATCCATAGGCTAAGC  
GAACATTATAACAAGTGAATAAATTCATTCTGAACAAAGATACAAAACAGCACTGACGTGCTGACTTATT  
TTTCATTGACAATAAGTGCTCTTTTTTACA

>9\_rnd-1\_family-249\_\_LTR\_\_Gypsy

ACTAAGCAACTAAGACGAGTTGCATGAGAGGCCAAACCGCCGCTTATGCCTACGAGGGAATACTAAGCAACTAAGACGA  
CTAAGACGAGTTGCATGAGAGGCCAAACCGCCGCTTATGCCTACGAGGGAATACTAAGCAACTAAGACGAGTTGCATGAG  
GTTGCATGAGAGGCCAAACCGCCGCTTATGCCTACGAGGGAATACTAAGCAACTAAGACGAGTTGCATGAGAGGCCAAAC  
AGGCCAAACCGCCGCTTATGCCTACGAGGGAATACTAAGCAACTAAGACGAGTTGCATGAGAGGCCAAAC  
GCCCCCTTATGCCTACGTGGGAAGAAGAAGACCCTATAACAACAGTACCGGCAGCGCCAACATATTAAATT  
AAATAGTAATAATAAACTTAAAAATTGTAATGCCCGACGACAATTGAGTCGACCGGCAAGACGTTTGG  
CCNGTACAGCCATTCGAAACAATAGGTAGGAAAAATACAGATTGTAAAAAATAAATTTTAAAGATGCGT  
TTTAAGCAGAAAAACAACAAGCAAAACAAAACCCGACTTGTAACAATAAAAGCATCAAATTCAATAA  
ATATATGTAATAAAACCTCAAATGAACGATACAAACAACAACCTTGTCTTGTAAAGTAAACGAAAACAAT  
TTAACATTACGCATTTGTAAATTTTAAAGATAATTCCTTTTTACTTTTATGTACGANCCCATACAATATAT  
GAATATTAATATCAAAAAGAGGAAATTAAAAAGTTATAATTCGTTTCAGCTTGTTCNCATTAGGTAATTCAA  
AATTATGATCAAGAATTAGCATGATCGAGGACAAGATTAACAAAGTATATAACGACTATACAGACTTTTCG  
TATGCGAGCCATACAAATTTTGCAAAGGCATAGAGAATTCATACCAGTATATGAGTTCGAATCCGAATAT  
ATAGAAACATTCGGCAGAGTGACAAGTCCACTCTATTTCATGTTCTAAAATAGAGNGCGGAATAATCTTGT  
CCACACTACCCTACGTCAAAATAAAAACAATTATTGACGAGCATCCGATTCTAGGGCAGACAACAATTGT  
CTTAGTACGTCTGCATAGGTAGTAGTCAAATCAAAAAGCAAGAGTATTTATATAGGAATATGGGGGAAAA  
NAATCAAAGGCAGATGATAACACTGCCAATGTAGTTAACGTAGTAGAAGTCGTAGACACCACTCCCCATG  
TGCAGTTAACAAACATACTGCTAATAATACTCATTGTAATAGCTTCAGTAAACATCCTTCTGAAGATTTAT  
CTTCTTCATAAAAAATCACTGAGGAAGCGTTACATGAGTCGAGCCAACGACTTAGACAAGGTCTAAGCCA  
CTGCTTAAATAAAATATTTAAGTAGCGGAAGCTTACATGGACTGGTCCCAAATAGTAGAAAAGATAAAGC  
GGCATAGGGAAAAATTTGATAAATCATAACAAGTGCCTTAATAAAAGCGCACCAGTTTTAAGACCCACCAT  
AATTAAACATACTGAGATCCTTGTATATGAGTACAATGAAATCAGGAGTCTAGTTACCGAGTGTCAAAAT  
AAACTGACAAGTTTACACAGAGTCCAACTTCAGACGTTTTACAGCGTCTAAGGGATAATCTGGTAAACT  
TAAATAAAAAGTATGATCTCCAGCTTTATCTACCATCGGTGTTAAATACACCGGTAACATTTGATAAGTCA  
CTACTGACAAACGACCAAAAATAGAAGATACAAAATTAGTAAACATGGCACAACAGTTGTAGAATTTAT  
CAAGCTAGCCACATCTCTGATACCAGAGTTTGACGGTAAGCCGGAAAAATCTACAAAGTTTTCTAGATTCTT  
TGAATCTATTAGAAACCTTAAAAGGCACACATGAGCTAACGGCCATAAGCCTTATAAAACAAAGCTAAAA  
AGGCCATGCGAGAAATTTGATAAGTAATGAGCAGACAATTGCTGCAATCATTACGCAACTATCAAATGCA  
GTAAAAGGAGAATCGGTAGAAGTTGTATCTGCTAAGCTTCTTAATTTGCAACAGAAAAATAAAACGGCTA  
ACCAATACACCCCAAGAGGTGAAAAAACTGACAAAGGCCCTTGAAGGCGCCTATATCAGTGAAGGTCTA  
AGCCAATCACTTGCAAACAATAACAGCACTACAACAGCTGTAAAAGCTATGACCCAAAATTGTTTCGATTG  
ATAAGGTAAAACCTTATCATGCAGGCAGGCACATTCACAAATATGAATGATGCCGTATCCAAATTTGTCAA  
TAGCTGCACGGAGATAACAGGTCAAAGTAACACTGTCCTGTATTATCGACGAGGTGCAAACAATAATAAT  
AGAGGAGGCCGAGGTTATAATCGTGGCAGAAATTACAACCACAACAATTATAACCGAGGCGGTAACAAC  
AATAACAATAATTACAATAACCGTGGAGGAAGACGAGGCCAAAATAGAGGAAGAGGCCGAGGTAACCTCC  
AACCAAGGTTATAATAGTAACAATGTGAGAATGGCGCAAAATACGCCGGAAAACCTCTCAGAACCCTTTAG  
GAAACAACCAGTAAATGTAAAGGTTTCATTCCATCAATTACAGTCTTAATATATTTGTCACTTTTTATAATC  
ATTCAACTGAAAATAAACTCACATTCCTAATAGATACTGGTGCAGATATCTCACTTTTAAAAATAAATTCA  
GACAATTTCAAATTTCAAGAAGAAAAAATTATAAACATCCAAGGCATAGGCCAAGGTGTAATAAAATCTC  
AAGGAACAACCTTCAATAGAACTTCAATCCACAAAAATATATTATTCCACACGAATTTCAATTTAGTAGATTCC  
GATTTTTCAATACCGTGTGATGGAATAATAGGCATTGATTTTTATTAATAAAATTCATTTGTCAATTAGATT  
CAAACCAAGTGAAGACTGGTTTATAATTAGACCTCAAATTTAAATTATCCAATTCATGTTCCGATAACAT  
ATAGTGCTGGCAACAACACAGTTCTCTTGCCAGCCAGATCCCAAGTAATTCGAAAAATAGACATTAATAC  
AGTAAATGATTATATATTTGTTCCCTAATCAAGAAATACATAATGGAATTTATGTTGCAAATACAATAGCAG  
CATCCAAACATGTATACATTCGCCTTCTAAACACAACCTAATTTTCGACCAATTGGTCAAAGTAAACAAAATC  
CAATATGAAAATTTAACAGATTACGACATTCATAGCACTANTCCAGAAAATAGAAGCGAACAAGTACTTT  
CAAAATTAAGAAAAAATTTTCCAGAACAATTCAAAAGTCAACTAACAGAATTATGCACCAAGTATAGTGA  
TGTGTTTCGACTGGAAACCGAACCAATAGCGACAAATAATTTCTATAAACAAACATTAAGACTTAAAGAT  
GATGAACCCATTTATATTAAAAACTACAGAAGCCCGCATAGCCACGTTAAAGAAATTCAAAAACAAGTAG  
GGAAATTAATAAACGACAAAATCGTAGAACCGTCTGTATCCGAGTATAACAGCCCACTCTTGTTAGTTCC  
GAAAAATCATTACCAAATTCGGAAGAAAAAGAAATGGCGATTAGTAATTGACTATCGCCAAATCAACAAA  
AACTACTTTCTGATAAATTTCCGCTCCCCAGAATTGATGATATTCTAGACCAACTGGGCAGAGCTAAATA  
CTTTTCATGCCTTGACTTAATGTCAGGTTTCCACCAAATTGAACTTGAAGAAAATTCAAGAAATATAACAT  
CTTTTCAACGAGCAATGGCTCATATCGCTTCACGCGATTACCATTGGTCTTAAATAGCACCAAATTCA



TTTCAGAGAATGATGACTATAGCATTCTCGGGTTTAGAACCCTCCCAGGCATTTCCTTTATATGGATGACTT  
AATGGTGATAGGATGTTCCGAAAAACACATGATTAAAAACTTAACTGATGTTTTTAATGTATGTAGGAAA  
TATAACCTGAAGTTGCATCCAGAAAAATGTTCATTTTTCATGCATGAAGTGACATTTTTAGGTCACAAATG  
CACTGACAAAGGAGTATTGCCAGATGACAAGAAGTTTGACGTCATCAAAAATTATCCTGTCCCTCATGAT  
GCGGACAGCGCGAGACGATTTGTAGCATTCTGCAATTATTATCGTCGATTTATAAAAAACTTCGCCGATTA  
TTCACGGCACATAACTAGATTATGTAAAAAGAATGTTTCCTTTTGAATGGTCAAGTGAATGCCAAAACGCA  
TTCCAATACCTTAAAGAAAAGCTTATGCACCCACATTATTACAATATCCTGATTTTTCGCAAAGAATTTTG  
CATTATAACAGATGCCAGTAAACAAGCTTGCGGAGCAGTTCTAACTCAGAACCGTGACGGAATTCAGCTC  
CCAATAGCTTATGCATCTCGTTCATTTACAAAAGGGGAAAGCAATAAGAGCACAACAGAACAAGAGTTAG  
CGGCAATTCATTGGGCAATTACCCATTTTAGACCATATATTTATGGCAAACATTTTACTATTA AAAACGGAT  
CACAGACCATTGACATATCTTTTTTCTATGACTAATCCCAGTTCTAAATTA ACTCGCATGCGGCTAGAGCT  
TGAAGAATACGACTTCACAGTAGAATACCTAAAGGGGAAAGATAATTTTCGTAGCAGACGCACTTTTCGCGT  
ATTAATATAAAAAGAACTCAAAGATATGCAACATAAAGTCTGAAAGTCACTACCAGGCGACAAAGTAGA  
CAAAATAAAAACTGTACAGTAGAAAATTATGAACTTCTGCCAAGGCAAAGTCATAAAAAATGTATCCAAGC  
CCAACGTACATGAAGTCATTACAAATGATGAAGTACGAAAAGTAGTGACCTTGCGCATAACAGNATCTAA  
ATGTTTATTTAAACATGGAAATAAAATTATCGCAAGAATTGAAGTTAGCGATTTATATACCAATGGAATTC  
TCGACCTAGGTCAGTTCTTCCAAAGGCTCGAAAAAGAGGCCGGTATATTA AAAATCAGCCAACTCAAGGT  
GGCACCGAGCGAAAAGATCTTTGAATCAGTTTCAATAGATTCTTTTAAAAATATGGGCAATGAAATATTA  
AAATCTTTAAGAGTAGCGCTACTCCAGCCGGTGACCCAAATAAAAGATGAAAAAGAGATACAACAAATA  
TTGTCTACATACCATGACGACCCAATTCAAGGAGGTCATAGCGGCATAACAAGAACGTTAGCGAAAATAA  
AAAGACACTACTACTGGAAAAATATGACACGTCATATAAAAGAGTACGTACGTAGATGTCAAAAATGCC  
AAATGTCTAAAACAAAGACGCACACAAAAACTCCTCTGACTCTCACAGAAACACCTGTGAATGCTTTTCTGA  
TATAGTGATAGTGGATACAGTTGGTCCGCTACCCAAATCGGAAAATGGTAATGAATACATAGTCACATTA  
ATATGCGACCTTACAAAATATTTAGTAGCCATTCCAATAAAAAGCAAAAGCGCAAATAATGTGCGAAAAG  
CTATATTCGAAAATTTCACTACTCAAGTTTGGTCCAATGAAGACGTTTCATCTCGGACATGGGAACAGAGTAT  
AAAAACCAGATTTTAACTGACTTATGCAAGTATTTGAAGATCAAGAATCTCACCTCTACTGCATATCATCA  
TCAAACATTAGGGACAATAGAACGAAGTCATCGAACTTTTAATGAATACATTCGTTTCATACATCTCTGCAG  
ACAAATCTGATTGGGATGTCTGGGTTCAATATTTCACTTATTGCTTCAACACGACACCATCAGCAACGCAT  
GAGTATTGTCCATACGAACTAGTATTTGGCAGACTACCGAAACAGTTCATAGATTTAAACAAAACCTAATT  
ACATAGATCCTATTTATAATTTAGATGACTATTCTAAGGAAATAAAGTTTAGATTAGAAATAGCATACAA  
AAAGAGCTAGAATTATGTTAGAAAAAGCCAAGGCTTATAGGAAATTAGCATATGACGAAAAAAAAAAAAA  
CTTTGAATTA AAAAGTAGGAGATAAAGTACTTATAAGAAACGAAACAGGGCACAAATTAGACCCAGTATAT  
TTAGGACCATATATAGTAGAGAAAAATAGAAAATAATGACAACATTTTTTATTAAAGATAGTAAAGATAAAA  
AAACAAAAAGTTCATAAGAATAGATTAAAAATTTTTTAATTCTTAATAAAAAANAAATTAAAAATATATGAC  
GGCCTGATCAACCGAATGAAAAAAATTTTTTTTTTACAAATAAACGAATTATAAATTTTTTTATACCTTAAA  
TAATTTTTTGATTTTTTATACTCCAACATTTAAAATTTCTTATTATATAAAAAAAATTTCAATTTTTTACANAA  
AAAGAAGAAAACCCCAATAATTAAGTTCATTTAATAACTACACATTCATAATGTTACGTTATTTCTCTAAA  
AAGGAGGTGTAGTGCGTATATGCCCTTACAGAATACCCCGTACTTAAACATAAAGTATGCAGCACTTTGTT  
GCATACAATAACAATAATATAGTAAACGAGCCAGAGCCACATTATGTATTGGCTCGGTCTCATATTACG  
CAGCGCGGTTCACTAGCCTCACTAGCTGACCGTTTATGCTTATGATGCATATCCCACGCTCCGTCTGAGCG  
CATTCGCTGAGCAATATATATGCTCACTAATACAGGCATATGCGAGCTACTCACTCTCCCTCTCTTTGTAG  
CTGTTAACGAATAACAGCATAAGTATATATGTATATCCATAGGCTAAGCGAACATTATAACAAGTGAATA  
AATTCATTCTGAACAAAGATACAAAACAGCACTGACGTGCTGACTTATTTTCATTGACAATAAGTGCTCNT  
TT

>9\_rnd-1\_family-434\_\_LTR\_\_Gypsy

AAAAACTATGCCAAGTGGCTAAAAAAAGGTGTGAAAAACAAAGGAGTCACCTTAGGTTGTCCTTGTGG  
ACCACCCTCCCTCTAATGAGGACCTCGGTCCCCAGGTCCGCTTCCACGGCCTTCTCATCACATAAAGGTGT  
GAGTTTGTTTCCGAGCCGTCGGTTGGACTTGACCAAAACTTTGTACCAACGTCGAAGACCCTATTCTGCC  
GATTTGCGTTCTCCCTAGCTCTGAGCGTCGTCTGAGCGTTTCTGATCTTTTCTTGATCTTTTCTTGTGGCTC  
ATCTGGGTGCGCCTGAACCACATCGACTGGTCTCTGGTCGATGACCGAATGGATCGACTTATTGTACTCAG  
TTGTAGCCAGTAAAATTACTTCTACGGTGTGAGTTATGCCTTTATCGATCTTTAGGCATCTGGCTAGTTCTA  
ACAGAGTGCTGTGAAAGCGCTCAACCTGTCCATTTCGAGATGCTATGCAATGGTGGTGCATTTGAAATGCT  
GACCCCATAGTTGTTTGCGAGCAAAGTCACGATGGTCTCTGAATTC AATGACGGTTCATTGTACAGTAAA  
TGGATCTGGCTTTTGAAAAAATTCATTAGTTGCATTAAAGCTGGCTTCAGATCCACAATGGTTCTTGAAG

GGACCGGTTGGACAATAGCAAACCTTAGAGAACTTGTTCGATGCAAGTGAGAAAGTATTTCTGTGTCAGTGGA  
GAAAATGTCTATGTGTAACATCTCTCCTACATGTGAGGGGATCGGTGTCTCCCAAGCTCTTGTTTTTGGG  
GTGTCTATCATATTTAGCCCTAGCACATGTTTTGCAATTTTGTACTATTTTCATTGGCTATTTTTGCCATCTTT  
GGAAAGTAGTACTCTGAGAGTACCTGCTTAATATTTTCTGTGTCAGACCTATGGGCCCTATTATGCTCGGC  
TGTGAGGATTTCCCTTCTTTCTCCAACCGCAAATACGTCCACTACGCGATTTTTTGCAGTGCCAGAATTTTGT  
GGCCGGGTATCTTCGAACCAATGCATCTTGTATCATTGCAAGCGTGTGTAAATTACAGTGAGAGCATTTA  
CGCATTGTTGGTGAAACTACATCTTCGAGCTCTTCTAGCAGCGATTTCGATGCAAGTATAGCTGATCAAGTAG  
CGTTTCTTATTTCCAAAAAGAATAAAACTTTCGTTTTAAGGGGAAACGCGCCTCTTCTAGCACTATTTGGTT  
TTGAAAACAATTCAAGGGTTTGTCTGTTGTCTCAATGGTGTGTTGGTGAGAGATACCTCACTGTGGATCGTTG  
CTGCGCAGGACTCAACTTCTTGTTCATTTACAGCGTTGAGCTGCTGTCTTGACAAGGCATCCGCAACCAGA  
TTGTCCTTGCCAGGCTTATAGAAGATACGTGCATTAGACTCGTCAATGCGCGCTTTCCACCTTTTAATCTTC  
GCATTTGGATTGGATTCCGAAACTGCGAAGGTCAAGGGTTGATGGTCAGTGAAGATATTAATGTCTTTTAC  
CCCATACAAATAGTGCCTTAACCTTGGCAAGTGACCATACGATGGCCAATAACTCTCTCTCATTGTGTCAT  
AGTTAACCTCGCTGTCTTCAATGTTCTTGAAATCATTGTTATAGGACGACCCTCTTGAGACAAAACCTGCA  
CCTATGCCGTGAGCCGAAGCGTCGGTCGTTAGATCGAATGGCTTCTTAAAATCGGGGTACCTGAGCATT  
CATTCTCGGATGACAAAATATCGCGCAACTTCTGAAACGCCCTTTGCTGCACTTCAGAGAATTGAACCTTT  
ATATTTCTGGACCTATGCTTACTGACTGTTCCATTTTCACCCTTCAAGATATTCGAGATGGGTCTTGCTATT  
GCGGCGAAGTCCCTAATGAAACATCTGTAATAACTTGCGAGGCCTAGAAATGATCTGACCTCGAACAGTG  
TTTTAGGTTCTGGATACTCCTGTATTGCCCTAACCTTTTCAGGATCCGTCGTGGCGCCAGTGCTGGTGACTA  
TGAAACCAAGAAAGTTCACGCTTTTCCTANAAAAACGTGACTTTTCGACGGAGACCCTCATGTTTGCTTCG  
TGTAAGCTTTTTAGGACCCAATCCACGTGTTAATGTGGGATTCCTCATCTTCTGAAAAGATGATTACGTC  
ATCGACATAAACATAGCAAGATTTGCCAATCTGCTCTCGCAGTATGTCGTCGATGGTTCTTTGGAAGATGC  
TTGCTGCATTCTTTAATCCAAAGGGGAGTCTTTTGAACCTCGTATTTCCCCCGTTACAGAGAAAGAGGTTT  
TTCACGGTCGCGTTCAGCGAGTATGATCTGGTGATAACCAGACTTGAGGTCTAATGTTGAAAAGAATTTG  
GCTCTCCCCAAATTCCCCAATATCGTTGATATATTTGGCATAGGGTATTTGTCAGGCACGGTTCTTTCTGTTA  
AGTTTACGAAAGTCCATTACCAACCTCATTTTCTTATTGCCTGCTTCATCAGTGCCCTTCTTGTCTACTACC  
CATATTGGGTTATTGTAGGGAGAGACGGACTTTTGAATTATATCATTTTTAGCAGATCCTTGATTTCTTTGT  
TAACGAAATCAGCTGCCCCCATTTGGATATGGGTAAAGCTTGGCATAGATCGGTTGCTCATCTGTGGTCCTA  
ATGGTAGCCACGACTGATGTGTTATACGGCAACGCCTCGTCTGGGTCTGCAAAGGCCTTTTGTCTGGTCTT  
TAGCATTTTCAAAAAGAACTTCTAGCTAATGGGGATGCCTCTGCACAGTCTACATTTGTGAAATTTACATT  
TTTGCACGTGTGGAAGGTGATTTGTTTCGACCTCCGTACCCCACTTAAGTTGTCCTGAAGCTAGACAAAGCG  
AAGCAGCTGCCTGCTTTAGCAGGTCAAGGCCTACAATCCCATCAAAAGTTGACAAGTCCGGCAGAATAAA  
AAAGGTTGCCTTTAACCCAAACATTGAAACAAAGCATTTGTGTGTAATTTGTGTCTCGCCGTGAATGGAAT  
GAATTTTGAAGGGGACTCTACCGAGCGGACGGTCAACCCTTCATGTGGCCGAATGAAATTCTTGGCCGCG  
CCCGTGTCTATGAGGAATCGCATGTGAGTCCCTACTACTCTTCGTCTGATGACGGGTAGCAGGGATTTGCT  
CCTAAAAATTGAGGGCATCAGAGTCATAACTAGCATCGTCATTGATTTGTGCCGCTGCGCTGGAGGCGGC  
ATCAGCATACGCCTCTGCCCCCTGTCCCGCGTCTTGCGTGACGTGATTCAACCTCTGCTGATTTCTCTGACC  
GCCTGTGCGGTGAGATGCGGGGTGCTTCTTATTTCGCGTAAGCAGGGGGCCTGAGTGGGCTGCAAGACCCTT  
GAGAAGGAAGGATCGACCTCCATGGGCACCGGTGCGCCATTATTATTGTGCTGCCTGCTGCTTCGTTGGTC  
AGTCTGCACTGGGGCCTTGCTTTGCTTGCTAAAGTGCGGATTCTTTGTACCGCTAGCTTGTGCTTCGGCTTG  
TTGCGAATGCCTCTCCTGTTGGTGACCCTGCGCTTTTGCATGCGGGCTCGCGCTCTTTGTCTTCTAGACTTCT  
TGCGAAATTAGCCGCGAATGCGTACCTTTCATGATTTGACTCGACTTCTTGCGCGAGAGCTAGCGCTGAAG  
GCAAATCTCTGGGCTTTGCTGCAAAGAGCACATCTGTAAGACTGCGCTTGAGACCCGATATGAACACACG  
CAACGCATCGTCGCGGAATTTTTACATAGGCCCTTTGCTAAAGCCGGCTCGTATGACATGTAACTTTGT  
TAGTGAGAAGAGTGAGTTTCTTCTCTACCTCATCGTAATATTGAAGCAGGGACAGGCCACCTTGCCCTCAAG  
GTACCTAATTCCTGTTCAATGACATGAATTGGTCTCTTGTCACTGTATGTGAAATCTAGGCGATTTATTATC  
GCATCAAAATTCAATACAGTACCAAATGAGGCCAGCACCGCGTCTGCGGGGGCCCCTAATCTTGCTTCTTAT  
GATGATAACAGCCTGATAATGACGAGAACTGCCATTATGTGGTCTGAAGATCTCGTAAGCGGCTAATGCT  
GCCTGCCTCCAAGATACATAAGATTCCTGTACTCCTGCAAACCTCAGGTAAGCGCTTGACGGCATCTAGCG  
GCTCGTCACAGCGAATGTCGTTTCTAATTCCTATAGCAGCATATGCTACTACTTGTGGGGCGGCAACGTTT  
GCTGCTGCTATTTGTTTCAGCTAACTCATTAAATTCCTTTGAGTCAACGCTTGCTCCCTCTGCTGGTTTGCAGCG  
GCCTGTTTCGGCTAAAGCATTGCTGATAGCCGTCTTACTACTTCCCTAAGCTGATCTGGATCCATTTTACCT  
GATGGTGGGGGAACTGCAGGGAGAAGTCTTGTAGCCGGGACTCTGATGCGAATGTCACAGTCGGAATCTG  
AGTCGCTAGACTGCTTACGAGGGTTTCTATATTGGCTGAACCGTGACATGCGCAGGCCAGTGGCCGCGAA

AAATAAAACGGGCGTCAAAAGATGGGTCTGAATTACGTCGCAGCTCTGAACCACGAGAAGTGTATGTATT  
GTTATAGCACAATTTTAGACACATAGAAAGTAACACAAAGTAATTTTATTAACGATCTGGATGATAAATT  
GTTTCAACTAAAATTCTCAAAGCAGTCACTCTCACGTGTTTCAGAACTTGGTTCTGATTATTATTATTTAA  
AAAATTTTTTATATGATCTGTTGCAATATAAAATACTCACTAGTACTAACTAAAATAAAAAATTTTTGTGT  
TTGAAGAAAAATTTTGGCTAGAGTATCCACTTACATGATTCAATTAACACAAAAAAAATTTTCTTTATAA  
AATTGGTCACTCGCAGCTCCCGCGCTGCTGTCTTAATTGTTGTTGGTTGTTGCAGCTCCCGCGCTGCTGTCT  
TAATTGTTGTTAGTTGTTGCAGCTCCTGCGCTGCTGTTTTACTTGTGTTTGGTTGTGGAGTCCGACCACTAGT  
TGGGCGCCAAATTAACATCCTTCAGTCCTGTAGTGGCTGAAGATTAGGTTGAGAGGCGACTGTGCCTCTTA  
TTGCTGGCCTCGGGCTCAGACAATAAAACAAATTATTTAACGGCCTAAGTGCCGGAGTGAATATTTATTTA  
AGCGACTTATTGGAAGAGCGCTGAATTCAAAACCTAAAGAACTTAATGCACAGAAAGTTTTACTTAAGCT  
AAGCCAAAACCTCGCATCACGCCACAATGTCATGGTTCGGCAAGCCGACTCAGCAAAATCTTAGGCAATAAC  
GGAAACTCTTGCGAGCAAAACAAAAGTGTCCGGTTACCGCCGCTGACCATTGCAGCTATTGCGCGCTGATA  
CAAAGTATGCAGTGTGCAATTGCGGGGGCTGTTTCTTAACCTTATGAAGCACGCGATAGCGAGGGTTGAT  
TATAACTTATGAAATATCCTATATTAAGTGTTATGTGTTAACTACTCCCCCTCAANTATAAGGCCGCTCCTC  
GGCCGACCCAATCCCGGCGCAGCACTTCTCGTAACTGCTTCGCAGACTTCTTTGCGTCGATGATCCGCCAAA  
GAGTGAGGCCAATGCAGATTAAAGCACAGCATATGGCTCCAATGATGAATGCCACACGATAAGCTTGATC  
AGTTCCGGCGTCTTTCTTGAATTGCTGTATCACCTCCAAATTACGTTCACTCAAACGATGAAGGTAAGGGA  
GGCTGAGGACATCTTGGCTGGCAGTGATGTTTCAGCAAGGGAGAATTGGCAATACCCGGGACTCTATTGCG  
TACGTTGTTGTGATTGTAAAACAGAGTCCCGTTAATTGCGACTCGGTCTCCGAACGTGATGAGATGCGTGC  
CTTGACCTGGATCTCAGTGCCGTTGTCCACCTGAATCCTTGCGGACCCGTCGTTGAGGATGATGATTCCG  
TCATCTACATGGGTGATTATTTCCAGGTTGCTCGGCTGGATCTCGCAGTGTGCCGTGCCACCTGCATGGAG  
CTCTTTGGCACATGAACTCTCTAATGCCAGACGACAAAATGTGGCTCCAGGTGAAGCGGCGCAACTCTGC  
AGTGTGTGGGTTTCTCCATCGCATTCCGGCTACGACGTTGTCAAACAATCGCAATATGAAGTTCTTGTGGAC  
GACAGGATAAATCGTAATTTTTCTGCAAGCTTTTTTAATCTTTGGGAATTTAATTATAAAATGTATAGTGTT  
AATGGATTGAAGAAGCTTTTACGGACGCAACGGACATAAGATCTCCTATGGGGGTGTTGGTGGGTTTCTCT  
AGCCAAATTGATTTCAAATCTGAGTGGTCCAAAATGTTTGGGCTAACAATGTTAGCCTTCGCAAGAGTAAT  
AGCAAGCATTAAATTTTGCAACTCCATCATCAGCATTCTGTTTCTAGTCAGTAGTGTTTCAAATAAATGGC  
TAGTGTCAACTTGTGAGTTTTTGGTTATCTTGAGAATTTTATTGACAGTGATTGTTAACTGGTTAAGCTGGT  
CTTGAAGTCTAGTGTTTATTTCTATTTGTCTATTGTTGGCATTATATTAGTTGCCTTTCAGTGAACCTAGTCTG  
CTCTAAATCACCGGCATCGGGTGTACCCGCCACAACCTTCAGTATGGATCCTAGGAAATCTAAGCTCCTGG  
CGACTCTATGGTGTGTGCCTAACGCCTCCAATAGGTCTTGTAGATGTGCCGTGTCCACACTTAGAAGTTTT  
TCATGTGGGATAGCGGGAACATGTCAATTAATTTGACCGTTTCTTCCACCATTTCGCACGTTACTCTGAGAG  
GTTTGCC

>9\_rnd-1\_family-335\_\_LINE\_\_R1

CAGAGCTATAAATGAAATTAATAACCCAACTTTTTATTGCCAACCAATTTAAACCACAATTTAAATGTAAT  
TGTCTTTTTTCAGAAATATACAAATATCTCTAANGGTACAATAAGATATACTGTAGAAAATTTTTATAAGGAT  
CGGTTAAGAAAACCAAAGTTATATGCAACTGCGCAATTGAATGGGGCAGCAGCTTTAAGAATTTCTGTAT  
ACATGTACACANACACATTCATGCGCGTCTGCTTTCGCATTCTAGCAGCATGGTAATTGCATCTTTTTTTTGT  
ATGTTATTTTAGTTCCTTTTTTATCATGGGGGNACTTAATTGTTGGTGTGGCTGCTGAGTAGAGGTATNGCA  
GGTGGTGCAGTCTGCCNENNTGNTCGAGCCCTACCGGGGAAAGTATTATTATTTTTTTTTTTTTTGTGGTG  
TGGCTGTTGAGCAGAGTCGACAGCAAGTATTNCTGGTTCGGTAAGCGAGTCCGAGCCCTGCCAAGGGAAGT  
TCTTTTATTGATTTATTTGATGTTGGAATAAGAGGGTTCAGGGTATCCCTAGNTCAGGGGGAGCTCCCTAG  
CTCCCTAGAACCTCTTTTACTTTTTTTNTTATCAAGTCAGTTTCCTATATAGGCTACATGGTTTAGATATA  
TTTAATTTTTTCGAATACCTCGGTACAAATTTTCAACAGTTGTTATAAAAAGTAAGGATATGCATTACATAAG  
GTGAAGTGGGCAGACACTTCCACAATTTTGTATATAAAATATATTCATGAAAATAAGGCTTTTAATATAAA  
ATATTCTTTACTTTACTTCTTTGCAAATATTATTTACGCAACATCTGAATAACCATTTTTTAATTACTTATTTT  
TATCGCACAGTAGACTTTACTTTTTTAAATACTAAAAATCTTATAATTTATGGAATCAACTGTTTCAGACAT  
CACATACTATCCAGATAAATCATCGTCATTTATAAATTGTACATATTTTTCTCGCAAACCAATGGCACCGT  
TAGATGATGTTAGAAAAAATTACTGTGCCAATTACTAAAAGTCAGAAACAATGTAGACGGCACTTTTACA  
TATTTTGTAAAACATTGCAAACAAAATTTGCACGCCACATAGAGTTTAAATATAGAATGGAACCAAGTTAG  
AGAGATCAGCGGTTTATCAAAAGACAAACAGCAAAGAATGAAATTGCTTGAGGGATGCTACTTACAATG  
AAGGAAGTTTTATAGTTTCACGTCAATTAAGGGAAAACCTCAAAAAGAGGGCTTTGGATTTTGTGTGCTGC  
AATGGATGTAAAGCCTACTTACCGAAGACAACAACCTCGGAATCAAATTAATAATNTTAATGTAGTAATATC  
CATAAAATATGCAACCGAGATATATTAACCTCTGCACGAAGTGCTGCAAATAATATTGCGAAATAAAATA

ATGCCTGTCCTTAATGACGTCGCCATTACTAGGACAATATTGTATGATCACCTAATTATATTGTTTACAAA  
TTTAGAAGCAATGAAGCACACGGAAGTACAGCATGATATGATAACAGCAATTATGCGTTATCTAAGTCGC  
CCTTTGATAGTAATAAAATATGTTATTTCCCTAAATATTATGATTCTGTAAAGTCTGGAATTCGTTATGTT  
GCTGAGTTTGATTATGATAATATTCGTTTTATGAAGCCTACTGCAGCGACAACCTCTAACATGCTTGGTAAA  
AATAGTACATGTGCGAGAATATTAAGGACACAGATCATAAAAAATATTGCGACAATAGCATAAAAATATTTA  
GAAAAATAAAAGATTTTGTTCAGGATCTACCTGCTAAAGCTTTGAATGAGCTAAACTAGAAATTCAACAT  
ATCACCATTAACCTCGTTATATCAGAGCNGAGTTAGCGAACTTGAGAGTCTTACTCTTAAGAGCTACAGA  
ACTGCTCATGCAATTGGGGCTATCGACGATAGAGCTAATTCTGACCTGTATGAAGGCACCTCAGCCAAAT  
GGAAAACATCACCAGGGTGATTATTCGTGCCAAAAACCGAACATTTCCAGTTCTTTTTACACCATGCGATC  
GGTATTGCATAGCCAATATACTCGAATATGGCAAACGCACAATAAATAAACCAGCTACTACACTANAGAT  
ATATTTTAGTGTGCCAAGCCCGTGGCCACTAAGAAAAGAAAATATTCGTGAGTGTCTATCCTAGAGAAA  
TTCGCAAATGAATGTGGTACACGTTGCCCTGAGTCCCTTTCAGGCACAGACCTGCGAAAGCAATTGACCA  
CACATACCGCTTTGTTCAACGTTAAGGACATTCAAATTGATTATTTGGCGAGCTTAATGGGTGATCATAAA  
GACATTCATAAAAAATTACTATCGTGTTGCTGCCTCTGTAGCGGGGTGACCCAAGTTTCTCAATTACTTATG  
TCAACAATGAACATGGAAGAGGAAAAATGCTGAAATTGCAGATGCTAATCTCGAGAGTGAGTTAATTTATT  
TAGCCCGTCTGTTGCGAAGAAAAATTTTAATAATCGCTGCAAGTTTTGGACCTGGAAGTGTATGTTGCGAA  
TACTTCAATAGAAGTTTTTCAAGTATCGGAACTTCGATACAGTAGAAGATACATTCAGTATTTAAGAAATT  
AGTAATGGTTTTTGGCGACCTATCCATATTTAAAAATATTTTGATGGCGGGACCTCGGCCCGAGTTTTTTTTTA  
ATTAATAGATTAAAAACAATCTAATTTAATACTTATATTGCTTATTTTATTTAAAGCAAAAATATTAAATAAA  
ATATTTTTCAACTGTTTATTTAAACGAGCCCGAACCTCGCCGCCCGACNCGCCAACATAAGCGCTCTACG  
GGTCAGCTGCGCATTCCGGACGGTATCAGACGAAGCAGCGCTGGTTATCGCAGGGGATGGTCCGCACAGCA  
GCAAGGATGCAAAGCATGGAACGATGGCAAGCACGTTGGGATCGCTCATCTAAAGGACGCTGGACACAT  
AGGCTTATCCCAAACCTTGAAGCCTGGATAAGCCGCAAGTATGGTAATACTAATTTTTTACTTAACGCAGCC  
TATCTGGCCACGGATGCTTCAGAAGCTACTTGAAGCGATTTCGGCCACGATAACACAGACGAGTGTTCTTG  
GTGCGGCAGTGAAATCGCAGAGGACGCCAACACATCATCTTTGAATGTGGAAGGTTCTCAGCGAACAGG  
CAGGGNCTGGAGGACAGCTTGGGGAGACCTATCACGGTGGACAACCTTGGTCAGGAACATGTTGGAGACC  
GCACAAAAATGGGAAGCNACCTGCACTTTTGCAGCAGAAGTGATGCTGGAAGTCAAGGAGAGTTGAGCGC  
AATAGACGGAGAGCGGAGGAAGTTAGGTGGCAACAACATGCCTGTGAAGCAATGCTTTGCGGCCGTTCC  
GCAGGCAATCCACGCCACCTAATCATCACGTACCCTACTATCTACATCCTNAGCATAAATTATTTATTATT  
TATATACTTATATTTGTGCAAATAAACAGAATACAAAAAACACACACACACAATGGAAACATAACAC  
CCCTTCCACCCCTCCCCACCCGCCCTTAATCCTTAACACCCCGCCACCCCTTTACCTTGCTTAACAACAC  
TTGACCCTGATAATAAATGTAAACAAACATACTGTGCCAGAACATACAGTCCCCACCACGGTGACATCAC  
TTCCTGTGCCAGAACATACAGTTCCTATCTACTATCCTATGTAGACATAAGAATATAATAAAAACGTGTTT  
CATCGACTTGGGAAATTCCAATTACTGCCCCGATCAGTTTCGAAATCATTTTCAAGAAAAGGCCAGGTTGTG  
TTTTTTTGTGTTGTGTACATACAAACATAGCCATGATAATTGTATAAGGCCATTAGAATCGAATAAATTC  
ACAGCATTAATTTGTAGGATTACTCAACTGAATAAGTTTCTGTGCTTCGAAATTTTTTAAACAAAAANGACA  
TTTTTGACCCAATAAAATGTATATATTCCTTATCCGCATGGACATAGGAGTCCGTATTGTATTAATATTTTA  
AGCGTACGCAGTACTATGTTCAAGTTTATATTATATCTATTCTAAAACCTCTACAAGATTAAAATATATTCA  
TAGATATCGATATTGATAAAAAATTTTTTTTATACCCTGAACCCATTAAAAATGGGTATAAGGGTATATTGT  
ATTTGTGCAAAATCCAAATGTATGTAACAGGCAGAAGGAAGCATCTCTGACCCCATAAAGTATATATATT  
CTTGATCAGCACCAATAGCCGAGTCGATCTAGCCATGTCCGTCTGTCTGTCCGTCCGTCCGTCCGTATGTA  
TGAACGCAAGGATCTCAGAACCTATAAGATCTAGAGACGAAATTAGATGTAGGTGCTCCTAGTTCCCGCG  
CAGATCGAGTTTGTGTTCCGATAATCGATAACTTACTCCGTTTCCAAGCAATCGATAAAAAATCGATATCGGC  
ATCCTGTTTTTTTTAGCAAATTGGGTAAATAATAAGAGCTAGAGCCACCAAACATGATATGTTGCTTCTAG  
AATATTGTATATATGTCAAGTATCTTTCATTTTGTACCTATCGCTACCTCCCCGCTACCACCGCAGAGCTAT  
AAATGAAATTAATAACCCAACCTTTTATTGCCAACCAATTTAAACCACAATTTAAATGTAATTGTCTTTTCA  
GAATATACAAATATTCTATGGTACAATAAGATATACTGTAGAAAATTTTATAAAGATCGGTTAAGAAAAA  
CCAAAGTTATATGCAACTGCGCAATTGAATGGGGCAGCAGCTTTAAGAATTTCTGTATACATGTACACAC  
ACACATTCATGCGCGTCTGCTTCGCATTCTAACAGCATGGTAATTGCATCTTTTTTTTGTAAATGTTATTTTAG  
TTCCTTTTTTATCATAAGTACTTAATTGTTGGTGTGGCTGCTGAGTAGAGGTATAGCAGGTGGTGCAGTCT  
GCCACGAGTTCGAGCCCTACCGGGGAAAGTATTATTATTTTTTTTTTGTGCTGGTGTGGCTGTTGAGTAGA  
GTCGACAGCAAGTATTGCGGTCAGTTGCGAGTTCGAGCCCTGCCAAGGGAACCTTTTTTTTATTAATTTATT  
TGATGTTGGAATAAGAGGGTTCAGGGTATCCCCTAGTCGGGAGCTCCCTAGCTCCCCTAGAACCTCTTACT  
TGTTTTTTTTATCAAGTTAGTTTCCTATATAGGCTACATGGTTTAGATATATTTAATTTTTTCGAATACCTCGG

TACAAATTTTCAACAGTTGTTATAAAAAGTAAGGATATGCATTACATAAGGTGAAGTGGGCAGACACTTCC  
ACAATTTTGTCAATAAATATATTCATGAAAACTCTTAAGGCTTTTAATATAAAATATTCTTTACTTTACTT  
CTTTGCAAATATTATTTACACAACATCTGAATAACCATTTTTAATTACTTATTTTTATCGCACAGTAGACTT  
TACTTTTTAAATACTAAAATCTTATAATTTATGGAGTCAACTGTTTCAGACATCACATACTATCCAGATAA  
ATCATCGTCATTTATAAATTGTACATATTTTTCTCGCAAACCAATGGCACCGTTAGATGATGTTAGAAAAA  
TACTGTGCCAATTACTAAAAGTCAGAAACAATGTAGACGGCACTTTTACATATTTTTGTAAAACATTGCAA  
ACAAAATTTGCACGCCACATAGAGTTTAAATATAGAATGGAACCAGTTAGAGAGATCAGCAGTTTATCAA  
AAGACAAACAGCAAAGAATGAAATTGCTTGAGGGATGCTACTTACAATGAAGGAACTTTTATAGTTTCAC  
GTCAATTAAGGGAAAACTCAAAAAGAGGGCTTTGGATTTTGTGTGCTGCAATGGATGTAAAGCCTACTTA  
CCGAAGACAACAACCTCGGAATCAAATTA AAAATTAATGTAGTAATATCCATAAAAATATGCAACCGAGATA  
TATTAACCTCTGCACGAAGTGCTGCAAATAATATTGCGAAATAAAAATAATGCCTGTCTTAATGACGTGCG  
CATTACTAGGACAATATTGTATGATCACCTAATTATATTGTTTAAAAATTTAGAAGCAATGAAGCACACGG  
AAGTACAGCATGATATGATAACAGCAATTATGCGTTATCTAAGTCGCCTTTTGATAGTAATAAAAATACGTT  
ATTTCCCCTAAATATTATGATTCGGTTAAGTCTGGAATTCGTTATGTTGCTGAGTTTGATTATGATAATATT  
CGTTTTATGAAGCCTACTGCAGCGACAACCTCTAACATGCTTGTTAAAAATAGTACATGTGCGAGAATATT  
AAAAGCACAGATCATAAAATATTGCGACAATAGCATAAAAATATTTAGAAAAAATAAAAAGATTTTGTTC  
GGATCTACCTGCTAAAGCTTTGAATGAGCTAAACTAGAAATTCACATATCATCATTAACTCGTTATATC  
AGAGCAGAGTTAGCGAACTTGAGAGTCTTACTCTTAAGAGCTACAGAAGTCTCATNCAATTGGGGCTAT  
CGACGATAGAGCTAATTCTGACCTGTATGAAGGCACCTCAGCCAAAATGAAAAACATCACCAGGGTGATT  
ATTCGTGCCAAAAAAACCGAACATTTCCAGTTCTTTTTACACCATGCGATCGGTATTGCATAGCCAAATATA  
CTCGAATA

>160\_rnd-1\_family-183\_\_LTR\_\_Gypsy

GGCAAACCGCCGCTTATGCCTACGGGGGAATACTAAGCAACTAAGACGAGTTGCATGAGAGGGCAAACCG  
CCCCTTATGCCTGCGTTGGAAGAAGAAGAAGACCCTATAACAACAGTACCGGCAGCGCCCAACATAT  
TAATTTAAATAGTAAGAAATAAACTTAAAAATTGTAATGCCCGACGACAATTGAGTCGGCCGGCAAGAC  
GTTTGGCCCGTACAGCCATTCGAAACAATAGGTAGGAAAAATACAGATTGTAAAAA AAAAAAAAAAAAA  
ATTTTAAGATGCGTTTTAAGCAGAAAACAAACAAGCAAAACAAAACCCGACTTGTAACAATAAAAAGCA  
TCAAATTCAATAAATATATGTAATAAAACCTCAAATGAACGATACAAACAACAACCTTGCTTTGTAAAAGT  
AAACGAAAACAAATTTAACATTACGCATTTGTAAATTTTTTAAGATAATTCCTTTTTAATTTTATGTATGAT  
CCCATACTATATATGAATATTAATATTA AAAAAGAGGAAATTA AAAAAGTTATAATTCGTTTCAGTTGGAATAT  
AAAGAAATAAGTGCTCCGCTTGTCTCATTAGGTAAATTCAAAATTATGATCAAGAATTAGCATGATCGAGG  
ACAAGATTAACAAAGTATATAACGACTATACAGACTTTTCGTATGCGAGCCATACAAATTTTGCAAAGGCA  
TAGAGAATTCATATCAGTATATGAGTTCGAATCCGAATATATAGAAACATTCGGCACATTGACAAGTCCA  
CTCTATTTCATGTTCTAAAATAGAGTGCGGAATAATCTTGTCTACACTACCCTACGTCAAAAATAAAAACAAT  
TATTGACGAGCATCCGATTCTAGGGCAGACAATATAGGAATATGGGGGGGAAAACAATCAAAGGCAGATG  
ATAACACTGCCAATGTAGTTAACGTAGTAGAAGTCGTAGACACCCTCCCATGTGCAGTTAACAAACAT  
ACTGCTAATAATACTCATTGTAATATCTTCAGTAAACATCCTTCTGAAGATTTATCTTCTTCATAAAAAATC  
ACTGAGGAAGCGTTACATGAGTCGAGCCAACGACTTAGACAAGGTCTAAGCCACTGCTTAAATAAAAATAT  
TTAAGTAGCGGAAGCTTACATGGACTGGTCCCAAATAGTAGAAAAGATAAAGCGGTATAGAGAAAATTTT  
GATAAATCATACAAGTGCTTAATAAAAAGCGCACCAGTTTAAAGACCCACCATAATTA AACNTACTGAGA  
TCCTTGTATATGAGTACAATGAAATCAGGAGTCTAGTTGCCGAGTGTCAAATAAACTGACAAGTTTACA  
CAGAGTCCAAACTTCAGACGTTTTACAGCGTCTAAGGGATAATCTGGTGAACATAAATAAAAAGTATGAT  
CTCCAGCTTTATCTACCATCGGTGTTAAATACACCGGTAACATTTGATAAGTCACTTCTGACAAAAGACCA  
AATAGAAGATACAAAATTAGTAAACATGGCACAAACAGTTGTAGAATTTATCAAGCTAGCCACATCTCTG  
ATACCAGAGTTTGACGGTAAGCCGGAAAAATCTACAAAGTTTTCTAGATTCTTTGAATCTANTAGAAACCT  
AAAAGGCACACACGAGCTAACGGCCGTAAGCCTTATAAAAACAAAGCTAAAAGGCCATGCGAGGAACCT  
GATAAGTGATGAGCAGACNATTGCNGCAATCATTACGCAACTATCGGACGCAGTAAAAGGAGAGTCGGT  
AGAAGTTGTNTCTGCTAAGCTTCTNAACTTGCAACAGAAGAGCAAAACGGCCAACCAATACACCCAAGAG  
GTGGAAAAACTGGCAAAGGCCCTTGAAGGNGCCTATATCAGTGAAGGTCTAAGCCAATCACTTGCAAACA  
AATACAGCACTACAACAGCTGTAAAAGCTATGACCCAAAATTGTTTCGATTGATAAGGTAAAACCTTATCAT  
GCAGGCAGGCACATTCACAAATATGAATGATGCCGTCTCCAAATTTGTCAATAGTTGCACGGAGGTAACA  
GGTCAAAGTAACACTGTCTGTATTATCGACGAGGTGCAAATCACAATAATAGAGGAGGCCGAGGTATA  
ATCGTGGCAGAAATTACAACCACAACAATTACAACCGAGGCGGTAAATAACAACAACAATAATTACA  
ATAACCGTGGAGGAAGACGAGGCCAAAATCGAGGAAGAGGCCGAGGTAACCTCAACCAAGGTNACAATA

ATAACAATGTGAGAGTGGCGCAAAATGCGTCGGAAAACTCTCAGAACCCTTTAGGAAACAACCAGTAAATGCAAAGGTTCAATTCATCAATTACAGTCTTAATATATTTGTCACTTTTTATAATCATTCAACTGAAAATAA  
ACTCACATTCCTAATAGATACTGGTGCAGATATCTCACTTTTAAAAATAAATTCAGATAATTTCAAAATTC  
AAGAAGACAAAATTATAAACATCCAAGGCATAGGCCAGGGTGTAAATAAAATCGCAAGGAACAACCTTCAA  
TAGAACTTCAATCAACAAAATATATTATTCACACGAATTCATTTAGTAGACTCNGATTTTTCAATACCG  
TGTGATGGAATAATAGGCATTGATTTTTATTAAAAAATTCAATTGTCAATTAGATTTCAAACCAAGTGAAGA  
CTGGTTTATAATTAGACCTCAAACTTAAATTATCCNATTTATGTTCCGATAACATATAGTGCTGGCAACA  
ATACAGTTCTTCTGCCAGCCAGATCCCAAGTAATTCGAAAAATAGACATTAATACAGTAAACGATTATAT  
ATTTGTTCCNAATCAAGAAATACATAATGGAATTTATGTTGCAAATACAATAGCAGCATCCAAACATGTA  
TACATTCGCCTTCTAAACACAACATAATTTTCGACCAATTGGTCAAAGTAAACAAAATCCAATATGAAAATTT  
AACAGATTACGACATTCATAACACTAATCCAGAAAATAGAAGCGAACAAGTACTTTCAAAGTTAAAGAA  
AAATTTTCCAGAACAATTCAGAAGTCAACTAACAGAATTATGCACCAAGTATAGTGATGTGTTCGGACTG  
GAAACCGAACCAATAGCGACAAATAATTTTTATAAACAAACATTAAGACTTAAAGATGATGAACCCATTT  
ATATTA AAAACTACAGAAGCCCGCATAGCCANGTTGAAGAAATCCAAAAACAAGTAGGGAAATTAATAA  
ACGACAAAATCGTAGAACCGTCTGTATCCGAGTATAACAGCCCACTCTTGCTAGTTCCGAAAAAATCATT  
ACCAAATTCGGAAGAAAAGAAATGGCGATTAGTAATTGACTATCGCCAAATCAACAAAAAACTACTTTCT  
GACAAATTCGCGTCCCCGAGAATTGATGATATTCTAAGACCAACTGGGCAGAGCTAAATACTTTTCATGCC  
TTGACTTAATGTCAGGTTTCCACCAAATTGAACTTGAAGAAAATTCAAGAAATATAACATCTTTTTCAACG  
AGCAATGGCTCATATCGCTTCACGCGATTACCATTTGGTCTTAAATAGCACCAAATTCATTTAGAGAAAT  
GATGACTATAGCATTCTCGGGTTTAGAACCTCTCAGGCATTCCTTTATATGGATGACTTAATGGTGATAG  
GATGTTCCGAAAAACACATGATTAAAAACTTAAGTATGTTTTAATGTATGTAGGAAATATAACCTAAA  
GTTGCATCCAGAAAAATGTTCAATTTTTACGCATGAAGTGACATTTTTAGGTCACAAATGCACTGACAAA  
GGAGTATTGCCAGATGACAAGAAATTCGACGTCATCAAAAATTATCCTGTCCCTCATGATGCGGACAGCG  
CGAGACGATTTGTAGCATTCTGCAATTATTATCGTCGATTTATAAAAACTTCGCCGATTATTCACGGCAC  
ATAACTAGATTATGTAAAAAGAATGTTCTTTTGAATGGTCAAGTGAATGCCAAAACGCATTCCAATACCT  
TAAAGAAAAGCTTATGCACCCACATTATTACAATATCCTGATTTTCGCAAAGAATTTTGCATTATAACAG  
ATGCTAGTAAACAAGCTTGCGGAGCGGTTCTAACTCAGAACCGTGACGGAATTCAGCTCCCAATAGCTTA  
TGCATCTCGTTCATTTACAAAAGGGGAAAGCAATAAGAGCACAAACAGAACAAGAGTTAGCGGCAATTCAT  
TGGGCAATTACCCATTTTAGACCATATATTTATGGCAAACACTTTACTATTA AAAACGGATCACAGACCATT  
GACATATCTTTTTTCTATGACTAATCCCAGTTTCGAAATTAAGTTCGCATGCGGCTAGAGCTTGAAGAATACG  
ACTTCACAGTAGAATACCTAAAGGGGAAAGATAATTTTCGTAGCAGACGCACTTTTCGCGTATTAATATAAA  
AGA ACTCAAAGATATGCAACATAAAGTCTGAAAGTCACTACCAGGCGACAAAGTAGACAAAATAAAAA  
CTGTACAGTAGAAAATTATGAACTTCTGCCAAGGCAAAGTCATAAAAATGTATCTAAGCCCAACGTACAT  
GAAGTCATTACAAATGATGAAGTACGAAAAGTAGTGACCTTGCGCATAACAGAATCTAAATGTTTATTTA  
AACATGGAAATAAAATTATCGCAAGAATTGAAGTTAGCGATTTATATACTAATGGAATCCTCGACCTAGG  
TCAGTTCTTCCAAAGGCTCGAAAAAGAGGCCGGTATATTA AAAATCAGCCAACTCAAAGTGGCACCGAGC  
GAAAAGATCTTTGAATCAGTTTCAATAGATTNTTTTAAAAATATGGGCAATGAAATATTA AAAATCTTTAAG  
AGTAGCGCTACTCCAGCCGGTGACCCAAATAAAAGATGAAAAAGAGATACAACAAATATTGTCTACATAC  
CATGACGACCCAATTCAAGGAGGTCATAGCGGCATAACAAGAACGCTAGCGAAAATAAAAAGACACTAC  
TACTGGAAAAATATGACACGTCATATAAAAGAGTACGTACGTAGATGTCAAAAATGCCAAATGTCTAAAA  
CAAAGACGCACACAAAAACTCCTCTGACTCTCACAGAAACACCTGTGAATGCTTTCGATATAGTGATAGT  
GGATACAGTTGGTCCGCTACCTAAATCGGAAAATGGCAATGAATACATAGTCACATTAATATGCGACCTT  
ACAAAATATTTAGTAGCCATTCCAATAAAAAGCAAAAGCGCAAATAATGTGCGAAAAGCTATATTCGAAA  
ATTTCACTCAAGTTTGGTCCAATGAAGACGTTTCATCTCGGACATGGGAACAGAGTATAAAAACCAGAT  
TTTAACTGATTTATGCAAGTATNTGAAGATCAAGAATCTCACCTCTACTGCATATCATCATCAAACATTAG  
GGACAATAGAACGAAGTCATCGAACATTTAATGAATACATTTCGTTTCATACATCTCTGCAGACAAAACCTGA  
CTGGGATGTCTGGATTCAATATTTCACTTATTGCTTCAACACGACACCATCAGCAACGCATGAGTATTGTC  
CATACGAACTAGTATTTGGCAGACTACCGAAACAGTTCATAGATTTAAACAAAACATAATTACATAGATCC  
TATTTATAATTTAGATGACTACTCTAAGGAAATAAAGTTTAGATTAGAAATAGCATACAAAAAGAGCTAGA  
ATTATGTTAGAAAAAGCCAAGGCTTATAGGAAATTAGCATATGACGAAAAACAAAAAACTTTGAATTAA  
AAGTAGGAGATAAAGTACTTATAAGAAACGAAACAGGGCACAAATTAGACCCAGTATATTTAGGACCAT  
ATATAGTAGAGAAAATAGAAGATAATGACAACATTTTTATTAAAGATAGTAAAGATAAGAAACAAAAAG  
TNCATAAGGATAGGTTAAAAATTTTTAATTCATAAAAATCCAATAAAAAATTTCTCTTTATGAATTCGAAC  
TCAAAAAAATAAAAAATAAAAAATATATGACGGCCTGATCAACCGAATGAAAAAATAAAAAATTTT

TTTTACAAATAAACGAATTATAAATTTTTATACCTTAAATAATTTTGTATATTTATACTCCAACATTTAAAA  
TTTTTTATTATATAAAAAAAAAAAAAAAAAANATTTTACAAAAAAAAAAAAAAAAACCTCAATAATTAAGTTCATT  
AATAACTACACATTCATAATGTTACGTTATTTCTCTAAAAAGGGAGGTGTAGTGCGTATATGCCCTTACAG  
AATACCCCGTACTTAAATATAAAGTATGCAGCACTTTGTTGCATACAATAACAATAATATGGTAAACGAG  
CCCAGAGCCACATTATGTATTGGCTCGGTCTCATATTACGCAGCGCGGTTCACTAGCCTCACTAGCTGACC  
GTTTATGCTTATGCTGCATATCCCACGCTCCGTCTGAGCGCATTCCGTGAGCAATATATATGCTCACTAAT  
ACAGGCATATGCGAGCTACTCACTCTCCCTCTCTTTGTAGCTGTAAACGAATAACAGCATAAGTATATATG  
TATATCCATAGGCTAAGCGAACGTTATAAAAACTGAATAAATTCATTCTGAACAAAGATACTAAACAGCA  
CTGACGTGCTGGCCTTTTTTNATTGACAATAAGTGCTCTTTTTACA  
>160\_rnd-5\_family-2276\_\_LTR\_\_Pao  
TGTTTCGGTCATATACCTCATATATACATTAGTCAGGGTATCAATAGCAATGTCAAAGCAGATTATGTTAAG  
ATTATGCTAATTCTCTTCTATTTGAATGTCATAAGCACTCATACACATGTACGAGGCCTCGCTCTCTTTCGA  
ACTCTGTAATTGCTCGGTCCCTTGAATCTTAATTTATGTTAAGAAATCAGTTCTGTAAGCATCATCATAGA  
AGTCAGTCGTGTTGCTCATCAATTTGTAAAACCTTTATTA AAACTTCATACCATCCACACACGCCCCACTTG  
AGATAAGATTCTTAAAAGGTCAAAAAAACGCTTTTGATCCAACATTTTGCGGCCCAACATTGGGGATAGT  
GTGTGGAAATTGCCGGCATATCGTTGCCGCACAACATTTTCGTTGGAAAAAGGTTTCATCGAACTCCTCGCA  
AAATACAGCATCGACAGCAACATTTGGCCAGCTCTTCTTTCTTGTGCGTTGCTTCGTCGCTGGAAACTC  
GCTACCTTCGCTTCGCTACTGCATTCTTGTAGCCGTTACTTCGCGCTGGATACGCTCTGAGTTTGATTGCTC  
ATTGCCTTTGCCTCACATCTCCTTTCTCGTTGCCGTTGCTTCGTCGCTGGAAACTCGCTGCCTTCGCTTCGCT  
GCTGCATTCTCGTTGCCGTTGCTTCGTCGCTGGAAGCTCGCTGCCTCTGCTTGTCTTTGCATTTTGCTTCAT  
CACTGCAAGCGACCCTCACATCGGCGAGCGCGACATTTACAAGTCTTAGCTGTTCTGTAAACAGTGGGAG  
CATTTGAACTCGCTCGCTCACATTGCTGAGAGCGACATTATCAGGTTAAAGTTAGGCTGTGAAAATTCTGC  
AGTATCAAAACTGCCGCTCGGTACATCGGTGATCACAACATTCTCGATACATAATGTCAACTCTTGAAGC  
AAACTTACGTAAGCGAGCGAACATAAAACGCAATGTCGCACACTTAGAGGATGTTGTAAGAGTGTCTACT  
GAGGTCGATGGCAGTGAAAAAAGATTATCACACGGTGAGCTACAATTACGCTTGGACATGTTGGAGATAT  
ACATTAAGGAGGTTTTTGGAAGTACAATCTGAAATTGAATTGGAAGATCCTCAGGACAATGGACGTGCAGA  
GGTGGAAGACACATATGTGAGTATCATCAATTGTCCATCCAATCCCAACTGGATGATGTACTGCACAGCA  
CCTCATTTTCTAACCCTGCTCCAATTGCTCTTCGCCGCCATCGAGTCTTCCTCGATTGACTCCGCCTGTAT  
TTGATGGGAAACGAGCAGAGTTTAAAAACTTCATTACATCATTCAATCAGATTATCGGTGCTGAGTACTCT  
CTTTCGAACATTGAAAAGTTTAATCATCTGCTGAATTGCTTGAAGGGGCCCTGCCCTACAGGCAGTAAAGGC  
ATTCCAAGTNACTCAGGAAAATTATCCCAAGGCTCTTGCTCGTTTAAGTGAACGTTATGACAATCCTACAC  
TTACATTTTTAGACACAATAGAATCACTATTCAATCTACAGCCAGTCGACAAACCGGACGGAAATCAGCT  
GCGCAGTCTGCTGGACAATGCGTCAGCCCTGTATTTCATCATTATCGTCATTGGGTACCGGATCAGATATTG  
CCCAAGCCATGTTGATATTCATCGTCATCGGAAAATGTGACCAGCAAACCTCGTAACAAGTGGAATGAGTC  
TCTTGACTTACGTACATTGCCAAATTGGGCTCACTGCACAACTATTTTGGAACGTCATTGTCAGTTTCTGCA  
ATCAAGCGGCATTGCATCGTATCGAATGGCTGATTCTTCGAAACAAAAACACGTGTACAAGCCTAGCAAG  
GGATTATCATTGCTATTACTAATCCNANATGCATTGTTTGTTCAGCTCCGACCATAAAAATTGTACAATG  
TTCTCAGTTTCAAGACATGAGTCCTAAACTCAAGTACGGAGTCGTAAAAAATGCTGGACTTTGCATTAATT  
GCCTTCAATTAGGACATCGGATGGCTCAGTGTCCGTCTAACNATCNTTGNCGAAGCCGCAAGCATCGCCA  
TCGCACGCTTCTGCATCTTGGCCAACCGCCNCGTNCANCGTCTGNACANCGACTCCAGCTACAACGCACT  
CGCATATGAATCAATCGCCAGGCGGACAAATAATTCTTGCTACTGCAAAGGTACTAGTGCGAGATTGCTC  
AGGGGCGTATAAACAAGGCAGAGCATTGCTTGACTCATGTTCCCAAGTCAATTTCATAACTGATCAATTC  
GCCCAACGGCTGCATCTACGCCGTGATAAGCATCATTTGAAATCCGCAGCATAGGGGAGACCTCGACTA  
AAATTAACAACGTGTAACAACACTGGAATTAANTCTCGTTTGTACCATTTGAAGTAACACTACAGTTCTGC  
ATAACGTCTCACATTGCCTACCAGCCGATTTCGGAATCGACACCTCAGATTGGAGGTTGCCCGCGAATA  
CACCACCTTGCGGACGAAACTTTCCACAGGTCAGGTCGGATTGATCTCCTTCTCGGTACCGAGGCATTTTTC  
GAATGCCTGGCTGTTGGACAGATTAAGCTCGGAGACAATTTGCCAGTCCTTCAGAAAACGTTGCTTGGAT  
GGGTTGTGTCTGGCAAGTATCGTCATCAGTCAGCTAAGCAGTCATCAACGTGCTTGTCTTCTGTGGAGGAG  
TCAATTGACGAAAATCTTCAATTACTGTGGAGCATTGATGCTCTAGAAAATTCTCCAAAGTCAATCAATCC  
AGAACATCGGCTCTGTGAAGATATGTNTTCAAGGACAACACAGATGAATAACGGCAGGATTGTTGTGCGT  
CTACCTTTCAAGGGAGATCCAATGTGCCTTGGCAATTCAAGCGATGTTGCACGTCGTCGTTTTTTATCGCT  
CGAGAGGCGCCTCAGTCAGCAGCCTACTGTTCAATCGCAATATGTAACCTTCATGAAAGAATATGAGGAT  
CTTGGCCATATGACTTTAGTGACGAATCCGAGATTAAGTGAGCCACACTTTTATATACCTCACCATTGTGT  
TTTTAAACCCAGCAGTGCATCAACGAAGTTACGAGTCGTGTTTGACGCCTCGTGCATTCATCGTCCCAGC

ATTCATTGAATGATTGCTTCTCGTTGGCCCAACACTCCAAGAAGATCTGTATATACTTCTCCTTCGTTTTTC  
GATTGGTTCGTTACGCCATCACAGCGGACGTTACGAAAATGTATAGACAAGTTTTAGTCAGCCCAGTGGA  
TCGGAAATTTCAATATATATTTTGGAGAGCATCCCCTGATGCTGATTTGCAGACCTTTGAGCTAAATACAG  
TGACGTATGGAACGGCCTCGGCCCCATACTTAGCAGTTTCGCAGTTTGCAATATCTGGCAGATCTGCATGTG  
AACGAGTTTCCCATTTGGCGCATCCATTGTAAAATCATCGTTTTATGTTGATGATCTGCTATGCGGAGCAAA  
CGAGCTCATCGAGTTGCAGAACATCAAACACGAGGTCACCGAGATACTTCGCCGAGGACACTTCCCATTG  
GTAAAGTGGCACTCCAATCATCCCGCCGTCAGGAACGACGAATCGGTAAAGGATTTAAACTTGGATGAAA  
ACGCTGTCACTAGCGCACTTGGCGTAGCTTGGGATCAACGTCGTGATGTGCTACTATTTGAATTTAAACCC  
AAAAAATTGTATTCAACAGTCACAAAGAGGACTATTCTCTCGACTGCGTCTTCTCTGTTTCGATCCATTAGG  
ATTGCTGGCACCAATCATTATCGTCTCGAAAATCATCATAACAGGAGCTATGGCTGCTAAAACCTCGCCTGGG  
ATGAATCTGTTCCGCAATCACTTCTACAAGCATGGAGAACTGCGTAACGTCTCTCAAGGAATTGTCGTGCG  
ATTTCAGTACCCCGTTTTTGGCTTGCAAGCTGAGCTCACAGACATACTGCACGCTTTCTGTGACGCATC  
AATACGTGCTTACGGCTGTTGCGTATATGTGCGTTCCACGGACTCGTATGGCAATGTCCAGGTTTCAGCTTC  
TGACTGCTAAATCTCGGGTGGCTCCTGTCAAGAAGCTGACGCTTCCTCGATTAGAGTTAAGCGGAGCTCA  
ACTTCTGAGTAAGTTATATACAACCTGTCAAAAACATATTCATCGGCAAGCCGCACAGCGCGCATTCTTGGT  
CTGATTCGCAGATTGTCTTGCCTGGCTGCAACAACACTCTATCACCTTGTGACATTTGTTGGAAATAGA  
GTATCCATTATACAAGATCAAACAGCAGATGGAAAGTGGAGACATGTACCGTCAAAATTGAACCCTGCTG  
ACATCGTGTACGTGGATGCCAGCTAATGAGCTCCAGCAATCAATTTGGTTTACAGGACCTGCGTTTCTG  
CGTGATTCCGAGACTCAATGGCCCTGCCAACAATTCGACAATGATTTGGACATGGACATCATCGATGCTG  
AAAAACGGAAGTCTACATTTGCTGCAATTATCGAAAGTAATTCTATTCTGGACTGGCTGAACGGAAGTAG  
TTCATACATTCGGGGCGCTTCGAGTTATGGCATATATGTTCCGGTTTTACCATATTGCCAAAAAGGAACACC  
CTGTCGAAAGTTCGCCGCCATGCCAGAAGAACTTCGCCACGCGTTGCACTGCATCATCAGGATCATCCA  
ACAGCACTATTTCAAGGAAGATTTGCAATTGCTAAGGAAACAAAGAGATTTGAAAAGCAATCTGAAATTT  
CTCAGCCCCCTTCATAGATGACTCTTCTGGATACGAGCTCATTAAGGTTGGCGGCAGACTCGAGCATGCTGA  
TATCCCCTCTCGTCAAAGGCATCCTTTACTTGTTCCTCAAGGAATCGCAATTTGTCCACAATTATGTTTCGGCA  
TCTTCACTTGCAGCAATTACCATGCAGGACCAAAGGCATTAGTTGGACTGCTGCGGCTTCAATTCTGGGTCA  
TAAACGCAAGAGCTTTAGCACGCAGCATTGTTTCGTTCTTGTGTACACTGTGTGATATCGTCCAGTTCTA  
CTTCGTCAAGTCATGGGTTCCCTGCCACCTGAGCGCTTATCCACAGACAAGCCATTTCCGCCACGTTGGAGT  
CGACTTCTGCGGTCCAGTGAACACCTATCTTCGAATACGTGGCAAGGGTCCACAAAATCCTATATCGCCA  
TATATGTCTGCATGGCCGTAAAGGCCGTTTACATTGAAATCGTGTGATGATCTTTCAACGAATAAGTTTTTG  
GAATCGTTGAAACGCATGGTTGCCCCGTCGTGGACCAGTATCGCACATCTATTGTGACAACGCCACAAATTT  
TGTCGGAGCATCCAACAAGCTACTCGAGTTAAAGAAGTTTATGTTCAACACTAGCACTCAAGATGCTATC  
CTATCATATTGTTCCCTCTGAAGAGATAACCTTTTCAATTTCTTGGGAGGCCGCTGTCAAGAGCGCAAAGAGTC  
TGCTGGTGCATACCCTCGCTAACACCCGGTTTACCTTTGAGGAACTGAACACCGCAGTCGTTGAGATAGA  
AGCAGTACTCAACTCTCGCCCGCTGTACCCGCTATCATCTGATCCCAACGACTTCAGCGCTCTCACTGCAG  
GACACTTTCTAAATGGAGATGCACCGCGCGCTTTGCCCGAGCGTGAGATTATCACCAACAACATCTCCAA  
CTTGGATCGTTACGAGCAGATCACAGCTGTAAACAGCAATTCTGGCGTCGTTGGTCTGCGGAGTATGTGA  
ACGAGCTTCGAGCCAGGACAAAATGGACTTCGGCTTCCCCAAATCTCACAGTTGACTCTATGGTCATCATA  
CATGAGGACAACACACCGCCATTACACTGGAAATTAGGGCGTGTGAGTCTGTTGTGAGTGGCAAAGATG  
ACCGGGTTCGTGTGCGCATATATTCGCACTGCCTCTGGACTCTGTTGCCGGCCAGTACATAAGCTGGCTGTT  
CTACCTGTCTCTTGAAAGATAATTCTTTCAAGGCGGCCGGGATGTTTCGGTCATATACCTCATATATACATT  
AGTCAGGGTATCAATAGCAATGTCAAAGCAGATTATGTTAAGATTATGCTAATTCTCTTCTATTTGAATGT  
CATAAGCACTCATAACATGTACGAAGCCTCGCTCTCTTTCGAACCTCTGTAATTGCTCGGTCCCTTTAATCT  
TAATTTATGTTAAGAAATCAGTTCTGTAAGCATCATCATAGAAGTCAGTCGTGTTGCTCATCAATTTGTAA  
AACCTTTATTAACAACTTCATACCATCCACACACGCCCACTTGAGATAAGATTCTTAAAAGGTCAAAAAAA  
CGTTTTTGATCCAACATTTTGGCGCCCAACATTGGGGCTAGTGTGTGGAAATTGACGGCATATCGTTGCCG  
CACAACATTTGTTGGAAAAAGGTTTTATCGAACTCCTCGCAAAATACAGCATCGACAGCAACATTTGGC  
CAGCTCTTCTTTCTTGTGCGGTTGCTTCGTGCTGGAAACTCGCTACCTTCGCTTCGCTACTGCATTCTTG  
NAGCCGTTACTTCGCGCTGGANACGCTCTGAGTTTGATTGCTCATTGCCTTTGCCTCACATCTCCTTTCTCG  
TTGCCGTTGCTTCGTGCTGGAAACTCGCTACCTTCGCTTCGCTGCTGCATTCT

>9\_rnd-1\_family-463\_\_LTR\_\_Pao

TGTTGCGGGACGAATTAANTTATCGATTGTTTAGTATTAAGTATATTCTGAAAGTATGTATNTTTGGCCTCC  
GAATGTACGGGCACACTGTATTTGGCTTGTGCGGCCATTACTTAAATGTTAAGCTCATTATTGTCGTGAG  
TTCGAAGGCCGTAGGAGGAAAGACTGCGGTAAGATTCCGAGGGAATATATATCTAAGTTCTAACCTATGT



AATCCGTTTAGAATAAAACACTTGCCTAGCACGTTTTTGCATTACGCTGTCTCTANTAACATCGGAGTAAC  
ATGGCCGGGGGCCAGGCGTAAACTTGCAGTGTTCAAATTGCAACTCCACCTTCGTTTGGCACGCGACATG  
ATCTTTTATTCGCAGTTCTTATTGTAAGAACTGCAAGGGCGACTTGCCTGAAGACAAGACGTGGTGTA  
CNTTGGTGTTACAGTGTGTGTACATAGACACAGCACAGGCAGGGCCTCCACCCAGTTATAGAGTCACCAT  
TGGTACGCAGCCAGCGTAAATATAGCAGAAACCATCTCCGAGCTGAGTAGGATGACACAACGGTCACCC  
AGGAAAAGCCCACGCTTAAACGATGGCCAGGAGATAGCTACCACGGCGAGTGGGACGCAGACAAAGCGG  
ACAAGTAGAATGGTGAGCACTGTATCACAATGCAAGTTCCCGCTGTTAGCGCACCAACAAAGCCCCAGCA  
CCGTGGATGTGGGCACAAGTGTACAACCTGCCGGCACTGTGGCCGCGGGAGTGAGTGCACGAGCCAGCA  
CATTGACAGGAGCGCCAAGCCCAAGCACGCAACTCTCAAGTACGCAAGTCATGGATTTGATAAAGAGAGT  
CGCTGCGCTAGAGCACGAGTTGCAGAGGTCAAAAACCTGGTCAAGCACATGTGAGTACAGTTACTGATCCC  
GTTAAGTTGAGTAGTGCTGGCGTGAGTGGTACAGCTAACCTGCCGCCATCTTTGATCGGAGCTTTGAGCGG  
AGAGCCATCGTCGAGTGGAAGTTTGAGTGAACTGCAACTATGAGTGTAGTCCCAAATTCAAGAGTAAGT  
TTGAGTGAACTGCAATTTTGAGTGGAAGTCCATTTTGAGCAGATCGCCATCTTTGAGTGAGGCACTGCC  
TACGTCATTGAGTGGAATTTGGGAACACAGTTGCAACCGGTAGAACGGGCTACAGTTATGGATAACTGC  
TCTACAACGTCAAGCCGCTCGACGCCATATTGCTCTGCAGGCATTGCACAGCCAACGCTCAGCTACACTCC  
GGCACAGGAGAACCAACAAGCGATAATTTTGAGGCCAACGCAGGCAACTGGGAACCTTCGCATGGACGAC  
TCCCAGGAACGATGTATGCCTGCCACGCAAATTACCAGATCTACCCGAGTTTGAGAGGCCAACCTGAGGAT  
TGGCCTATATTCTTCTGCGCGTTTACGGAAACAACCTTTGGCGTACAACCTGTACGAATCTGGAGAATAACCA  
GCGATTGTTGAAGGCACTCAAAGGCGAAGCACGTGACACTGTGAAGTCGTTGCTCATAACATCCCAGGAAT  
GTGAACAACGTAATGGAACAATTACGTTTCAGATACGGCCGCCGAGAACAGCTAATACGCAGCCAGCTAA  
TTAGTATTTCGAGAGGTGCAGCCAATTCAGGAGCACAGCATAGCTAAAATCGTGCCATATGCTACACGCGT  
GAGTAACCTTGCCGCTTTCTACAATCGGCTAACGGGGAACAGCATTTAGCGAATCCCCTACACTGATGG  
AGGATTTGGTCGCTAAACTACCACCAAGCAAGAGGGTGGAATGGGCCAGACATGCAGCTACGATTAGGC  
CTTTTCCCGACGGTCGTACATTTTAGCGCGTGTTAACGGACTACGCCAATGTGGTATGTACGATTGTGGA  
CGTCGATAGTAAGGAGCAAAGGCGTAGAGTGCTGCATGCCAGCATTGACCAGAATAATGAAGGGCGTCA  
CCGAGGTCGCACCAACAGTGTCCAATCTGTAATGGACAACACGCAGTCAGGGACTGCAACGAGTTTAACT  
TTAGCCTCTCCGCTAAAAAGGTGGACAGTCGTAAAAAGGCACCGGCTTTGTTTTTCGTGTTTACGAGTTGG  
CCACATGGCAAGAGTCTGCAATAGGGCCAACGAATGCCAAGTTAATGGATGCCGGAAGAGACATCATCG  
ACTCTTACATGATCAATGATGCCATGAGTCACAATGCACCGCAGCCAGCAGGTGATAGAGTGATGAATAC  
TGGACGGATGCCGCAGCCAGCGGATCCTCACACAAGGGCACCGCAGCCAGCGGATGCTCAATCGACGCA  
ACAAAGGAACTTAAGTTGTGTGTCGATTCCGATGGAGAACGCCTACTATTCCGCATATTGCCAGTGACATTG  
CACGGGGCCAATAAGCGGATCGATACGTACGCGCTCCTCGACGAGGGCTCGTCTGTAACGATGATCGACG  
ACGAGCTACTGCGCGATCTAGATATCAAAGGGGAACGCAGGCAACTAAATATACAGTGGTTTGGTGGA  
GAGCAACCAGAGAGCCGACCACAGTGGTAAGCATGGAAGTTAGTGGAGCGGACAAGCGCAAACGTCATG  
TGTTGCGAAATGTGTACGCCGTGTCCAACCTGAGCTTACCAATGCAAAGCCTGCATCAACGTGACGTCCA  
AATGTGGGGCAACGGTGCACGTCTTCCAATGAAACCGTATCGCGGGGCGGTACCAAAACTTCTGATTGGA  
CTTGACCATGCGCATCTTGGAAGTCCAATGCAAACAAAAGATTTGCACCACAGGGACCATATGCCGCAG  
CCACCGAACTTGATGGGTGGTTTTTTGGGCCGTAAGAGATCAACCGACGGCAACGTCATCAAAGTCATG  
CCTCCTAGCAGTGTGCGAGGAGGATGCAATCCAAAAGATGGTAAACGACTATTTTGATATCGAAAACCTC  
GGTGTGAAGCTTACGCCACCAGTCGCAGCCAGCGACGATGCACGAGCACAGAGGATACTCGAAGACACC  
ACGGTGAAAATAGGAGAACGTTACCAGACGGGTTTATTATGGAACCGTGATAATGTTGAGTTGCCACGAA  
GCTATGATATGGCATACAAAGATTGGTCAACATTGAGAGAAAGATGAAGCGTAACGATCAGTTTAAACA  
AGCCTATATGAAAATTATGGACGATTATGTTACAAAGGATATGCTCGACGATTGAAGCAGCATGAGGTC  
GCTTTAGCCAAACAGCGACAACTTTGGTATCTTCCGCACCTTTGGAGTTGAAAATCCAAATAAGCCCCGTA  
AGATAAGACTGGTGTTTCGACGCGGCAGCAAAGGTTGGTGATATTCATTGAATTCGGCATTATCCAAGGG  
GCCGCAGCACTATAAGTCGCTGCCGGCTGTTCTCTTCCATTTTCGGGAAGGTGCCGTTGGCGTTTGTGGAG  
ACATCCGAGAGATGTTCCATCAAGTGTTGATTCGACCGCAGGATAGATGCGCCCAGCGATTCTGTGGCG  
AAACGGCGATGATCGCCGGGAGCCTGATGTTTATGAGATGAGGGTAATGACGTTTGGAGCAGCATGTTTCG  
CCAAGCGCCGCACACTATGTGAAGACCTTGAATGCCCTGCAGTTTCAGGATTTCAGACCCTCGCGCGGTTA  
AAGCTATTCTTGAATGCCACTATGTGGACGACTATGTGGATAGTTTTGATAGTGAAGGCGAAGCCATCAC  
CATATCGACAAGAATAAGAGAAATACATGCAAATGCTGGATTCTGAATTGTGCCAGTTTACTTCCAGTTTCG  
CCAAGTGTAGCTGACGCGCTGGGCCAACATGGGGCTGCNAGGAGCATCGGATGGGGCGAAGCTGAAGAA  
AAGATTCTAGGCATGTGTTGGCAACCAGCCACGGACGATTTCAAATTCAACATGAAGTACCACAAAGTAC  
CCCGATGTGTGCTAAATTTGGAGCGAATTCCTACGAAGAGGGAATTCTTGAGCTTGATCATGTCAACATTC

GATCCTCTGGGATTTCTTAGCTGCCTCATGATAACTGGAAAGTTACTAATGCGTGAGATTTGGCGACGAAA  
TGTGCAATGGGATGAACCCTTACCAGATGAGATCGCCCGGGCCTTTAGCAAATGGCTTCAGGATATGAAC  
AACGTGGAAGGATTTTCGGAGCTCGCGCCATTACTTCGGCCCAACACCTGTGCGGGCAATACAGCTGCACG  
TTTTTGTTCGATGCTAGCCAGTCAGCATTTCGCAGCCGTGACTTACTTGAGGGTCACCTACGACAACAACGAC  
GTGCGAGTATGCTTCGTATGTGCCAGGACGAAGTGTGCCCCAATGAAGACGATGTCAATTCCACGACTGG  
AATTGCAAGCAGCCGTGTTAGGAACGAGGCTGATGGACACTGTCAAAAGGGAGCACAGTATAGCGATCA  
GCGACGCTATACTATGGACTGACTCCAAAACNGTGCTGCGTTGGATAGGCAGCACCCACCGTCGATATAA  
GCAGTTCGTTCGGAAATCGAGTGGGAGAAATTTTGGAGTCAACAAAGGTTTCCCAATGGAGATGGGTACCT  
ACTGCTGAAAATGCAGCAGACGACGCAACGAGGCCGCATTGCCACGTAGACCTCAGCCAACGGTCACGA  
TGGTTAGACGGGCCAACATTTTTGCGGCAGCCGGAAGCAGCTGGCCGCGAGTCCGAACCGGGCACGGAA  
CACTCATCCTACGAAGATGAAGAAGAGATGCCGAGTGAATTTGCCTTAGTTGCAGCAAATAACTTTTTTCAT  
TTCATTTTCAGAGATTCTCTAGCTACAGTCGGCTGGTGAGGACGACGGCTTGGGTTTTAAGGTTTCACGCGCT  
GGAGCCGTGGACAGAGGACTGAGCTTGAGAGATTCGGCCCTCACCGCGACGGAGTGTGAGAACGCTGAGA  
ACTTGCTGATACGGCGAGCGCAATGCGAAGCGTTCCCTGACGAGGTTTCGAGCCTCATACAATGAAGAATC  
AGTCGGTCATCGAAGCGACATAAGAGGGGCTGGCGCCATACTTGGATGACAATGGAGTCTTGCGTGCGTAT  
GGCAGGATCGATGCCGCACTGTGTATACCGCATAGTGCGAGAAGGCCAATAATATTGTACACCGGCACG  
CACTGACGGAACCTGATTGTGTATCACTACCATGTGAAAATGAAGCATCAAAACGTGGATGCAACGATAGG  
CGACATCAGGACCAGATTTTTGGATAACAAAGCTGCGTCGACTGTTGCGTACAGTAATATCTGGATGTAG  
TGTGTGCAAACCTACATAGAGCGCAGCCAGCGCCACCTATAATGGGTCCCTTGCCAGAGGACAGACTGGAG  
GCCAATGGATGGCCATTTAAGTTTACGGGTCTGGACTATTTTGACCACTCCTTGTGACGATCGGACGTCG  
AAAGGAAAAGAGATGGGTCGCCTTGTTTACGTGTCTGACGACAAGGGCCATACATTTGGAGCTGGCACAT  
GACCTGTCAACTGATTCCTGCATAATCGTAATCAGGAACCTTTCTTTGCCGTGCGGACCTGTACTGAGGTT  
GCGCAGTGACAACGGAAAGAACTTTGTTGGGGCCAACAGAGAAGCCAAAAGGCTAATAGATGTATTCGA  
GCCGGAGAAGATTCAGGGTGAGTTATCTTCTAGAGGCATTGAATGGATCTTCAACTGCCCAGCGAACCCA  
GCTGAAGGGGGGAGCCTGGGAAAGGATGGTGCAGTGTGTCAAGAGAGTGCTACGCCACACAGTAAAGGAA  
GTGGCACCAAAGCAACACGTAAGTGGAGAGTTTCCTGATTGAGGCCGAGAACGTTGTGAATTCTCGCCCGC  
TTACCCACTTGCCGGTGTCTGTGGACCAAGAAGCCCCCCTAACACCGAACGATCTACTCAAAGGAGTGGC  
CAATCTGCCTGACACGCCCGCTATCCACGAGCAGCCGAACGAGAGATGCGTCACGAGGAAGCAGTGGCG  
CATGGCGCGGCTGTTACGAGACCGTTTTTGGAAAGCGGTGGGTCTTAGAGTACCTGCCTACACTTGTGCGAC  
GCGTGAAATGGTGTGCGCGCGTTGAGCCGATACGCCATGGTGATATGGTGTTTATATGCGACCCGGCCGT  
GCCACGCAGAGAGTGGCGAAGGGGCATAGTGGAGGAGCTCTACCCTGGACCAGATGGAGTGCCTCGACG  
CGCCAGCGTCCGCGTGGCGGACAACAACCGAGTGCGACTGATGACTCGTCCCGTGGCTAAACTAGCCATA  
CTGGATGTGAGTGAAGCAGGGCCTTCACGGGGGCGGGGATGTTGCGGGACGAATTAATTTATCGATTGTT  
TAGTATTAAGTATATTCTGAAAGTATGTATATTTGCCCTCCGAATGTACGGGCACACTGTATTTGGCTTGTT  
GCCGCCATTACTTAAATGTTAAGCTCATTATTGTCTGAGTTCGAAGGCCGTAGGAGGAAAGACTGCGGT  
AAGATTCCGAGGGAATATATATCTAAGTTCTAACCTATGTAATCCGTTTAGAATAAAACACTTGCCTAGC  
ACGTTTTGCATTACGCTGTCTCTAGTAACATCGGAGTAACATGGCCGGGGCCAGGCGTAAACTTGCAGTGT  
TCAAATTGCAACTCCACCTTCGTTTGGCACGCGACA

>9\_rnd-1\_family-480\_\_LTR\_\_Pao

TGTTGCGGGACGAATTAATTTATCGATTGTTTAGTATTAAGTATATTCTGAAAGTATGTATATTTGCCCTCC  
GAATGTACGGGCACACTGTATTTGGCTTGTTGCCGCCATTACTTAAATGTTAAGCTCATTATTGTCTGAG  
TTCGAAGGCCGTAGGAGGAAAGACTGCGGTAAGATTCCGAGGGAATATATATCTAAGTTCTAACCTATGT  
AATCCGTTTAGAATAAAACACTTGCCTAGCACGTTTTTGCATTACGCTGTCTCTAGTAACATCGGAGTAAC  
ATGGCCGGGGGCCAGGCGTAACTTGCAGTGTTCAAATTGCAACTCCACCTTCATTTGGCACGCGACATG  
ATCTTTTATTCGCAGTTCTTATTGTAAGAACTGCAAGGGCGACTTGCGCTGAAGACAAGACGTGGTGTA  
CATTGGTGTTACAGTGTGTGTACATAGACACAGCACAGGCAGGGCCTCCACCCAGTTATAGAGTCACCAT  
TAGTACGCAGCCAGCGTAAAATATAGCAGAAACCATCTCCGAGCTGAGTAGGATGACACAACGGTCACCC  
AGGAAAAGCCACGCTTAAACGATGGCCAGGAGATAGCTACCACGGCGAGTGGGACGCAGACAAAGCGG  
ACAAGTAGAATGGTGAGCACTGTATCACAATGCAAGTTCCCGCTGTTAGCGCACCAACAAAGCCCCAGCA  
CCGTGGATGCGGGCACAAGTGTACAACCTGCCGGCACTGTGGCCGCGGGAGTGAGTGCACGAGCCAGCA  
CATTGACAGGAGCGCCAAGCCCAAGCACGCAACTCTCAAGTACGCAAGTCATGGATTTGATAAAGAGAGT  
CGCTGTGCTAGAGCACGAGTTGCAGAGGTCAAAAACCTGGTCAAGCACATGTGAGTACAGTTACTGATCCC  
GTTAAGTTGAGTAGTGCTGGCGTGAGTGGTACAGCTAACCTGCCGCCATCTTTGATCGGAGCGGAGAGCG  
GAGAGCCATCGTCGAGTGGAAGTTTGAGTGAACTGCAACTATGAGTGTAGTCCCAAATTCAAGAGTAAG

TTTGAGTGAAACTGCAATTTTGGAGTGGAACCTACCATTTTGGAGCAGATCGCCATCTTTGAGTGAGGCACTGC  
CTACGTCATTGAGTGGAATTTGGGAACACAGTTGCAAACGGTAGAACGGGCTACAGTTATGGATAACTG  
CTCTACAACGTCAAGCCGCTCGACGCCATATTGCTTTGCAGGCATTGCACAGCCAACGCTCAGCTACACTC  
CGGCACAGGAGAACCAACAAGCGATAATTTTGGAGCCAACGCAGGCAACTGGGAACCTTCGCATGGACGA  
CTCCCAGGAACGATGTATGCCTGCCACGCAAATTACCAGATCTACCCGAGTTTGGAGGCCAACCTGAGGA  
TTGGCCTATATTCTTCTGCGCGTTTACGGAAACAACCTTTGGCGTACAACCTGTACGAATCTGGAGAATAACC  
AGCGATTGTTGAAGGCACTCAAAGGCGAAGCACGTGACACTGTGAAGTCGTTGCTCATACATCCCAGGAA  
TGTGAACAACGTAATTGAACAATTACGTTTTAGATACGGCCGCCAGAACAGCTAATACGCAGCCAGCTA  
ATTAGTATTCGAGAGGTGCAGCCAATTCAGGAGCACAGCATAGCTAAAATCGTGCCATATGCTACACGCG  
TGAGTAACCTTGCCGCTTTTCTACAATCGGCTAACGGGGAACAGCATTTAGCGAATCCTACACTGATGGA  
GGATTTGGTCGCTAAACTACCACCAAGCAAGAGGGTGAATGGGCCAGACATGCAGCTACGATTAGGCCT  
TTCCCGACGGTCGTACATTTTAGCGCGTGGTTAACGGACTACGCCAATGTGGTATGTACGATTGTGGACGT  
CGATAGTAAGGAGCAAAGGCGTAGAGTGCTGCATGCCAGCATTGACCAGAATAATGAAGGGCGTCACCG  
AGGTCGCACCAAACAGTGTCCAATCTGTAATGGACAACACGCAGTCAGGGACTGCAACGAGTTTAACTTA  
GCCTCTCCGCTAAAGAGGGTGGACAGTCGTAAAAAGGCACCGGCTTTGTTTTTTCGTGTTTACGAGTTGGCCA  
CATGGCAAGAGTCTGCAATAGGGCCAACGAATGCCAAGTTAATGGATGCCGGAAGAGACATCATCGACT  
CTTACATNATCATGATGCCATGAGTCACAATGCACCGCAGCCAGCAGGTGATAGAGTGATGAATACTGGA  
CGGATGCCGCAGCCAGCGGATCCTCACACAAGGGCACCGCAGCCAGCGGATGCTCAATCGACGCAACAA  
AGGAACTTAAGTTGTGTCGATTCGGATGGAGAACGCCTACTATTCCGCATATTGCCAGTGACATTGCACG  
GGGCAATAAGCGGATCGATACGTACGCGCTCCTCGACGAGGGCTCGTCTGTAACGATGATCGACGACGA  
GCTACTGCGCGATCTAGATATCAAAGGGGAACGCAGGCAACTAAATATACAGTGGTTTGGTGGAAAGAGC  
AACCAGAGAGCCGACCACAGTGGTAAGCATGGAAGTTAGTGAGCGGACAAGCGCAAACGGCATGTGTT  
GCGAAATGTGTACGCCGTGTCCAACCTGAGCTTACCAATGCAAAGCCTGCATCAACGTGACGTCCAATG  
TGGGGCAACGGTGCACGTCTTCCAATGAAACCGTATCGCGGGGCGGTACCAAACTTCTGATTGGACTTG  
ACCATGCGCATCTTGGACTGCCAATGCAAACAAAAAGGTTTGCACCACAGGGACCATATGCCGCAGCCAC  
CGAACTTGATGGGTGGTTTTTGGGCCGGTAAGAGGTCAACCGACGGCAACGTCATCAAAGTCATGCCTC  
CTAGCAGTGTCGCAGGAGGATGCAATCCAAAAGATGGTAAACGACTATTTTGATATCGAAAACCTTCGGTG  
TGAAGCTTACGCCACCAGTCGCAGCCAGCGACGATGCACGAGCACAGAGGATACTCGAAGACACCACGG  
TGAAAATAGGAGAACGTTACCAGACGGGTTTATTATGGAACCGTGATAATGTTGAGTTGCCACGAAGCTA  
TGATATGGCATACAAAGATTGGTCAACATTGAGAGAAAGATGAAGCGTAACGATCAGTTTAAACAAGC  
CTATATGAAAATTATGGACGATTATGTTCAAAAGGATATGCTCGACGATTGAAGCAGCATGAGGTGCGT  
TTAGCCAACAGCGACAAACTTTGGTATCTTCCGCACCTTTGGAGTTGAAAATCCAAATAAGCCCGGTAAGA  
TAAGACTGGTGTTCGACGCGGCAGCAAAGGTTGGTGATATTTCAATTGAATTCGGCATTATCCAAGGGGCC  
GCAGCACTATAAGTCGCTGCCGGCTGTTCTCTTCCATTTTCGGGAAGGTGCCGTTGGCGTTTGTGGAGACA  
TCCGAGAGATGTTCCATCAAGTGTTGATTCGACCGCAGGATAGATGCGCCCAGCGATTCTGTGGCGAAA  
CGGCGATGATCGCCGGGAGCCTGATGTTTATGAGATGAGGGTAATGACGTTTGGAGCAGCATGTTTCGCCA  
AGCGCCGCACACTATGTGAAGACCTTGAATGCCCTGCAGTTTCAGGATTCAGACCCTCGCGCGGTTAAAG  
CTATTCTTGAATGCCACTATGTGGACGACTATGTGGATAGTTTTGATAGTGAAGGCGAAGCCATCACCATA  
TCGACAAGAATAAGAGAAATACATGCAAATGCTGGATTGCAATTGTGCCAGTTTACTTCCAGTTTCGCCAA  
CTGTAGCTGACGCGCTGGGCCAACATGGGGCTGCGAGGAGCATCGGATGGGGCGAAGCTGAAGAAAAGA  
TTCTAGGCATGTGTTGGCAACCAGCCACGGACGATTTCAAATTCAACATGAAGTACCACAAAGTACCCCG  
ATGTGTGCTAAATTTGGAGCGAATTCCTACGAAGAGGGAATTCCTTGAGCTTGATCATGTCAACATTCGATC  
CTCTGGGATTTCTTAGCTGCCTCATGATAACTGGAAAGTTACTAATGCGTGAGATTTGGCGACGAAATGTG  
CAATGGGATGAACCCTTACCAGATGAGATCGCCCGGGCCTTTAGCAAATGGCTTCAGGATATGAACAACG  
TGGAAGGATTTTCGGAGCTCGCGCCATTACTTCGGCCCAACACCTGTGCGGGCAATACAGCTGCACGTTTTT  
GTCGATGCTAGCCAGTCAGCATTCGCAGCCGTGACTTACTTGAGGGTCACCTACGACAACAACGACGTGC  
GAGTATGCTTCGTATGTGCCAAGACGAAGTGTGCCCCAATGAAGACGATGTCAATTCCACGACTGGAATT  
GCAAGCAGCCGTGTTAGGAACGAGGCTGATGGACACTGTCAAAAAAAGGAGCACAGTATAGCGATCAGC  
GACGCTATACTATGGACTGACTCCAAAACAGTGCTGCGTTGGATAGGCAGCACCCACCGTCGATATAAGC  
AGTTCGTCGGAAATCGAGTGGGAGAAATTTTGGAGTCAACAAAGGTTTCCCAATGGAGATGGGTACCTAC  
TGCTGAAAATGCAGCAGACGACGCAACGAGGCCGCATTGCCACGTAGACCTCAGCCAACGGTCACGATG  
GTTAGACGGGCCAACATTTTTTGCGGCAGCCGGAAGCAGCTGGCCGCAGTCCGAACCGGGCACGGAAC  
ACTCATCCTACGAAGATGAAGAAGAGATGCCGAGTGAATTTGCCTTAGTTGCAGCAAATAACTTTTTTCATT  
TCATTTACAGAGATTCTCTAGCTACAGTCGGCTGGTGAGGACGACGGCTTGGGTTTTAAGGTTACGCGCTG

GAGCCGTGGACAGAGGACTGAGCTTGAGAGATTCGGCCTCACCGCGACGGAGTGTGAGAACGCTGAGAA  
CTTGCTGATACGGCGAGCGCAATGCGAAGCGTTCCCTGACGAGGTTTCGAGCCTCATACAATGAAGAATCA  
GTCGGTCATCGAAGCGACATAAGAGGGCTGGCGCCNTACTTTGGATGACAATGGAGTCTTGCGTGCGTATG  
GCAGGATCGATGCCGCACTGTGTATACCGCATAGTGCGAGAAGGCCAATAATNTTGTACACCCGGCACGC  
ACTGACGGAAGTATTGTGTATCACTACCATGTGAAAATGAAGCATCAAAACGTGGATGCAACGATAGGC  
GACATCAGGACCAGATTTTGGATAACAAAGCTGCGTCGACTGTTGCGTACAGTAATATCTGGATGTAGTG  
TGTGCAAGCTACATAGAGCGCAGCCAGCGCCACCTATAATGGGTCTTTTGGCAGAGGACAGACTGGAGGC  
CAATGGATGGCCATTTAAGTTTACGGGTCTGGACTATTTTGGACCACTCCTTGTGACGATCGGACGTCGAA  
AGGAAAAGAGATGGGTGCGCTTGTTTACGTGTCTGACGACAAGGGCCATACATTTGGAGCTGGCACATGA  
CCTGTCAACTGATTCCTGCATAATCGTAATCAGGAACTTTCTTTGCCGTCGCGGACCCGTAAGTGGTGC  
GCAGTGACAACGGAAAGAACTTTGTTGGGGCCAAACAGAGAAGCCAAAAGGCTAATAGATGTATTTCGAGC  
CGGAGAAGATTCAGGGTGAGCTATCTTCTAGAGGCATTGAATGGATCTTCAACTGCCCAGCGAACCAGC  
TGAAGGGGGAGCCTGGGAAAGGATGGTGCAGTGTGTCAAGAGAGTGCTACGCCACACAGTAAAGGAAGT  
GGCACCAAAGCAACACGTACTGGAGAGTTTCTCTGATTGAGGCGGAGAACGTTGTGAATTCTCGCCCGCTT  
ACCCACTTGCCGGTGTCTGTGGACCAGGAAGCCCCCTAACACCGAACGATCTACTCAAAGGAGTGGCCA  
ATCTGCCTGACACGCCCGCTATCCACGAGCAGCCGAACGAGAGATGCGTCACGAGGAAGCAGTGGCGCA  
TGGCGCGGCTGTTACGAGACCGTTTTTGGAAAGCGGTGGGTCTTAGAGTACCTGCCTACACTTGTGCGACGC  
GTGAAATGGTGTGCGCGCGTTGAGCCGATACGCCATGGTGATATGGTGTTTATATGCGACCCGGCCGTGC  
CACGCAGAGAGTGGCGAAGGGGCATAGTGGAGGAGCTCTACCCTGGACCAGATGGAGTGCCTCGACGCG  
CCAGCGTCCGCGTGGCGGACAACAACCGAGTGCGACTGATGACTCGTCCCGTGGCTAACTAGCCATACT  
GGATGTGAGTGAAGCAGGGCCTTCACGGGGGCGGGGATGTTGCGGGACGAATTAAGTTATCGATTGTTTA  
GTATTAAGTATATTCTGAAAGTATGTATTTTTGCCCTCCGAATGTACGGGCACACTGTATTTGGCTTGTTC  
CGCCATTACTTAAATGTAAAGCTCATTATTGTCGTGAGTTTCAAGGCCGTAGGAGGAAAGACTGCGGTAA  
GATTCCGAGGGAATATATCTAAGTTCTAACCTATGTAATCCGTTTAGAATAAAACACTTGCCTAGCAC  
GTTTTGCATTACGCTGTCTCTAGTAACATCGGAGTAACATGGCCGGGGGCCAGGCGTAACTTGCAGTGTT  
CAAATTGCAACTCCACCTTCGTTTGGCACGCGACA

>160\_rnd-1\_family-193\_\_LTR\_\_Gypsy

TCAAGAATATATATACTTTATGGGGTTCGGAGATGCTTCCTTCTGCCTGTTACAAACGTTTGGATTTTGCAC  
AAATACAATATACCCTTATACCCATTTTTAATGGGTTCAGGGTATAAAAAGGGACTTAAATAGCATTACA  
GAAAAAAGTCGCAATAACCATGCTGCTAAAATGCCAAGCAGACGCGCATGAACGTGTGTTTGTACATGTA  
TACAGAAATTCTTAAAGATGCTGCTCTATTCAATTGCGCAGTTGCATATAACTTTGGTTTTTTTTTNACCGA  
TCTTTATGAAATCTACAGTATATCTTATTGTATCATAGAATATTTGTGTATACTGAAAAAGTCATTTGCAA  
ATTAATTTTGGCTTAAATTGGTTGGCAATAAAAGTTGGGTATTAACTTGATTTATAGCTCTAGGGTGGTA  
GCGGAGAGGTGGCGATAGGTATAAAATGAAAGATACTATATAATATTTTAGAAGCNACATGTCANGTTTC  
GTGACTCTAGCTCTTATTATTTACCAAAATTGCCCAAAAAAAGGATATCGATATTGATGTTTATCGATTG  
CTTGGAACGGAGTAAGCTATCGATTATCGGAAACAACTCGATCTGCGCGGGCACTAGGAGCACCTNCA  
TAAAATTTCAAGTCTATAGCACTTATATGTTCTGAGATCCTTGCGTTCATACATACGGACGGACGGACGGA  
CAGACAGACGGACATGGCTAGATCGACTCGGCTATTGATGCTGATCAAGAATATATATACTTTATGGAGT  
CGGAGATGCTTCCTTCTGCCTGTTACATACATTTGGATTTTGCACAAATACAATATACCCTTATACCCATTT  
TTAATGGGTTCAGGGTATAAAAATACATATACATTGNCCTGATCAACCAACTGAAAAAATAATCAATCC  
TTGAAAAAACAATTAATAATGAATTTTACATTTTATATTTTATATCTTTATATTTTGAAATGTTTAC  
ATTAGTATATTCTCATAAATCTTAAATAATTTTTTTAAATTCATATTATTTTATCATTTTTTTACATTTTAT  
TATTTTATAAAAAAATAATATATACAAAAAATTTTGTTCAAATAATTAAGTTCATTAAATAACTACACA  
TCCATAATGGTACGTTATTTCTTTGAAAAGGGAGCTGTAGTGTGTATATGCCTTAAAGAACACCCTATAT  
ACAAATATAAAGTATAAACAAGCCCAGAGCCACTTTGTATATTGGCTCTGGCTCATATTACGCAGCGCAG  
TTCCTAGCCTCTCAGCTGATGCAACGATGAACAACAGTAGCAGTTATATCCTTAATTACTTTTAATTATA  
AAAAAATAATTTTGTAAAATTGAGCAGCATAGCCCGTAAACCTATGCGAAATGCTAGGTAGTATTTTGT  
GTTATTAGCAATATTGAAACCTTGAACTAAAAACATTGGCATTTAAAGCTAAAAACACTATATGTTACAT  
AAAAACATTATATGAATTTAAAAACATTACATCAACTTATGTAAGAAATTTAATTAATAATGGGTTCGAA  
CGAATCCAAGGTTGAAAAATCAGCCGCAAATGTTATAAATAACGTAAAAGTAATTGACCATAAAGAATA  
ATTACTACAATATCTCTTGTATCACTAGTATTGAAAGTGTATGCAATGCATACAAAGAAAATTAAGAAAC  
GCTATAGCAGTAGAGCAGACGGACTAGATAAGGTATGAATATATTTGAATATGTCAGACATAGAGGCAAT  
CATTAGGTTTACGTATAGAGATGAGCCAGACTTTCGTACTCGCGTATTAACGTACTGCGATTACATAGAG  
ATTTTATAAAGTGTGTGATTTTCAATACGAATACACGGACATGTTCAATACTCATATTAATGGTGCAGT

GCATCGATAGATATCTATTATAATAATATGGAATGGAGTATATTAGTGAAAAATATCAATGACTTTAAAC  
ACCAATTTGACAAGTCATATAAATGCATCAATAAAGGCATACCTATAAAGGTAGAAACACTAATATACCA  
TGTACAAATATTGATAAAACAATATAACAATATAGTACATGCAGTAGATTCCATTAAAGAAAACTAACA  
CAAGAACATGCCAAACAATGCCTTAAAGTCATACAATCTTTAAATACAAGATTGAAAAACATTGGCATT  
GACAGAATATCATAATAAATGTTCCAGAAGATCTATTTTTACCAGCAAAGTTTGAACCAAACCAGCTGCA  
AGATCTGAATGAGTCGAAGCACTAGCCAAAGAACATATAGACTGGACATGAGTACAGGAAAGTAGGCAC  
GAAAAGTATCGGTGGCATCTGGTCCAAAATCGCGAGTAAGGGAGTAAGATATACAAATGATGTATTTTTG  
AACCGCTTACTCTACAGGAAAGTGCTTGGCGCACTCTCTTCCATATGATTTGTGCGATAGAACGACAACGC  
TGTTAACTTTTTATCTCGCTCGCACTTACTCTCAGCTCTCAATGCTCTCTCTTTATGTTTAGGGATCGTTTTAA  
TGTGTGTGTGTGTGTATTTGTCCGACAAGCAAACTGGGCAAAAATTCAATTTTTCCCAAATGCTGAGGCA  
TTTATACCCTTTTGAAGGCACGAGTAATATGCAATAGAGAAAGGGTTTGCCACGTCGATGCGAAATTCCT  
GCATTTTAGCTCGCTATCGTTGGTAAGGGTACCCAAGTGATGCCATGTGTGCATTTAAATATTTTGGACT  
CGTTATTCACGCATACTTGCATATTTTGTATATGAATAGAAGCATTTATGCGCTTGTGTGCCTGTTGCTNGC  
CTGTCCCCGATGCAAATTTAACAATATTTTGGNATTTCTTATTTTCGACCTCTACACATAGGCATAGACAT  
ACAAGTGTCTGTGAATGGGCAGATCATGGGCGCAAAAGAAAATATCATTATTGGCACGCGTCTGACGCGC  
GCCCTTGAAATGAACAACAATAGCAATGGCAGAGGACATTATAGACGTAATGCCCGTGGTAATAACCGA  
GGAAGGAATAATTCCAACCGAGGTAACAACCAAAAATAATAACAATAGAGGTAATGTCCGAGTAAC TGAA  
GGTAATTCGGAAAACCATTTGAGACCCCTCAGATGTTTAGAGCCAATAAATGGCACAATAAAAACCATCAN  
CCTCAACCTCAGCATATTTGTAAAANTTAACAATGAAAGAACAGGTAAATCCTTTGCACTGTTGCTTGATA  
CTGGTGAGATATATCTATATTAAGAAAATGTAGATATATTTGAAAACGTAAACGAAAGAGTTACTAC  
CCAAAATCGGGAATTGGCGAAGGAACAATTTTTTCAAAAANGCTTGGCCTTTATAGAACTCACTACAGGTA  
AATACATAATTCCGCATAACTTCCATTTAGTCGATCAAAAATTCCCAATACCTAGTGATGGCATACTAGGC  
ATAGATTTTCATAAAACAATATAATTGCCAATTAGATTTCACTCAGAGTGGGCGACTCACTAATTCTTCGCC  
CAAACAACCTTAAATTATCCGATTAAATTACAAATACTTCATACTTGTGACAATAATGCCACAGTACTCCCA  
GCTCGTTCCGAAGTTGTCCGTGAAATACAAATACCCTCAATAAAAAATCAAATTTTGATATTAAATCAAG  
AAATTGATGAAGGAATTTATATCGCAAAATACCAATATCCAACCACAAAAATACTTGTGTCCGAATTTTAA  
ATACAACAAATACCAATAAGATCGTCAATTTAAATAAAAATAAAATATGAAACCTTAAATGATAAAAGAA  
ACTAACGAAGAAAGAGACAACCTTCGTTATGAATAAATTAATTAAAAACCTTCCGCCTTTATTCAAAGTC  
AATTAAGAGATTTATGTACCAGGTATACAGACATATTCGGACTAGAAACCGAATCAATAACAACAAATAA  
TTTTTACAAACAAAAGCTTAGACTGAAGGATGATCAGCCCGTATAAATAAAAAAATTATAGGAGTCCTCAT  
AGCCAAGTACAAGAAATTCAAGCCCGAGTACAAAAATTAATAGACAATAAAATAGTCGAACCGTCAGTC  
TCATAATATAATAGCCCACTCTTACTAGTCCCGAAGAAGTCTCTTCCGGACTCTGAAAAGAAAAAATGGC  
GATTAGAAATTGACTATCGTCAAATTAATAAAAANGCTATTGTCCGACAAATTTCCACTACCTAGAATTGAT  
GATATTCTAGATCAACTAGGTAGAGCAAAATATTTTTTCATGCCTAGACTTAATGTCTGGCTTCCACCAAT  
TGAACCTGAAAAAAGTTCTAGAAATATAACGTAATTGTCAACAAGCAATGGCTCATATCGCTTCACGCGA  
TTACCATTTGGATTAAAAATAGCATTTTCTGGTCTACAACCATCACAAGCATTTCTTAANATGGATGATCT  
AATAGTAATCGCTTGTTCAGAAACATATGGTCAAAAACCTTAACTGATGTTTTCGACCAATGTAAGAAA  
CTCAACCTGAAACTACATCCGGA AAAAATGTTTCAATTTTTTATGCATGAAGTCACATTTTTTGGGACACAAATG  
CACTGATAAGGGAATCTTGCCAGACGACAAAAAATACGACGTGATAAAAAATTACCCAGTCACACACTAT  
TCGCGTCGCGTAACAAGATTAGTTGTAAAAAATACGTAAGATTGCAATGGACGCCTGAATGCCAGAACAT  
CTCAAAACAGCACTAATAAACCTAACTTGCTACAATATCCAGACTTCACCAAAGAATTCTGCATAATAA  
CAGATGCAAGTGAGCAAGCGTGTGGAGCAGTTTTAACTTAAACTTGACTGGACTCCAACNTCCAATTGC  
ATACGCATCAAGATCCTTTACTGAAGGAGAAAGTAACAAGAGTACTACTGAACAAAAATTAACAGCTTTT  
CTCTGGGTAATAACACACTTTTCGACCATATATTTATGGTAACCATTTACCGGTAAAAACGGATCACAGACC  
ACTAACATCTATTTTCAATGGTCAATCCAAGTTCACAATTAACACGTATGAGGCTTGATTTGCAGNAATAT  
ACCTTTACGGTAGAATATCCGAAGGGTAAAGACAGTTACGTAGCAGATGCGTTATCGAGAATAACCATCA  
AGGAGCTACAAAATATAACAGGAAACATAATGAAAGTCACTACAAGACAAGCACGTAGACAAGAATCCT  
GCGCAGGAGAAAAAGAAATAGAATTGCCTAGGCAATCTATAGAAAAAGCTTCAAAGGCCAAAGTGTACC  
AAGTCATTAACAATGACGAGGTACGAAAAGTAGTGACCTTGCATGTAAACAATATGACATGTTTTTTTAA  
CATGGNAGACAAATTACAGCAAGATACGATGTTACCGATTTATATACTAATTAACCATTTGATTTGGATC  
AAATCTTTCAAAGGCTTGAAACGCAAGCCGGTATATATAAAATCAGCCAACCTCAAAGTGGCACCGTGGGA  
AAATATCTTTGAACACGTTTCAATGGATAATTTATAGAAAATGGGCANTCAAATATTAAATCTTTAAGA  
GTTGCGCTACTCCACCCGGTGACCCAAATAAATTCTGAAAAATAAAAAANAAGCTATCTTGTCTAAACTAC  
TTGATGATCCCATACTAGGAGGACAGGCATTATAAAAACCTTGGCCAAAGTCAAACGACATTATTTTTTG

AAAGGTATGTCTAAACAAATAAAAGACTACATCCGCAAATGTCCAAAATGCCAGAAAGCAAAAACACTACA  
AAGAACACAAAAACTCCTCTAACAATAACAGAAACACCAATATCCGCTTTCGACAGAGTAATCGTTGACA  
CAATTATTACCATACCTAGAACAGAGAATGGGAACGAGTATGCAGTTACACTCATTTGTGATTTTACGAA  
ATACCTCGTCGCAATTCCGATCCCAAATACAAGTGCAAACACTGTCGCTAAATCTATATTCGAATCTTTTA  
TTCTGAAGTACGGTCCAATGAAGACGTTTATTACGGACATGGGTACGGAATATAAGAATTCAATTATAAA  
CAATTTGTGCAAGTATATGAAAATAAACAACATACTCAACTGCACATCATCACCGGACAGTTGGAACAG  
TAGAAAGAAGTACAGGACTTTTAAACGAATACATACGATCATATATATCAGTTGATAAAACTGATTGGGG  
CGTATGGATCAAATACATCGTATACTGTTTTAACACGACCCCTCTATCGCACACAATTATTATGAGCAAA  
TTTTTGGTAAACACCCAATTTACCAATATAAATAGAATCGACCCACTATATAATGTAGAAGATTATGCTAA  
AGAAGNTAAGTTTAGATTAGAAATAGCATATAAAAGGTCTAGGATAATGCTTGGAACATAAAGCAAG  
AAGTAAGGAACCTTTTGTATAAAAAAGTTATAGATTTTCAAGTAAAAATAGGAGATAAAGTCTTATTAAGA  
AACGAAACTGGCCATAAATTGGATCCAGAATATATAGGCCCATATACAATAGTTAACATAGAAAATAGGG  
ATAACATTCTAATTNAAGATAACAAAAATAGGACCCAAAAAGTTTATAAGAATAGACTAAAAATTTTTAA  
CGAAT

>9\_rnd-1\_family-413\_\_RC\_\_Helitron

CGCAGACAAGACCCAGTCTACCGGGCAAACGAACAAAGACAAAATACTGTAGACCACTCGATCGACGAG  
CTAATTCTCCAGTTAGAGAACAGGAGCAATTGGCTAATACTTCGCGTCGATCGACACGCAGACAAGACCC  
AGTCTACCGGGCAAACGAACAAAGACAAAATACTGTAGACCACTCGACTCGACGAGCTAATTCTCCAGTT  
AGACAACAGGAGCAATTCGCTAATACTTCGCGTCGATCGACACGCAGACAATACATAGTTTACAGGGCAA  
ACGAACAAAGACAAAATACTGTAGACCACTCGACTCGACGAGCTAATTCTCCAGTTAGAGAACAGGAGC  
AATTGGCTAATACTTCGCGTCGATCGACACGCAGACAAGACCCAGTCTACCGGGCAAACGAACAAAGAC  
AAAATACTGTAGACCACTCGACTCGACGAGCTAATTCTCCAGTTAGACAACAGGAGCAATTGGCTAATAC  
TTCGCGTCGATCGACACGCAGACAAGACCCAGTCTACCGGGCAAACGAACAAAGACAAAATACTGTAGA  
CCACTCGACTCGACGAGCTAATTCTCCAGTTAGACAACAGGAGCAATTGGCTAATACTTCGCGTCGATCG  
ACACGCAGACAAGACCCAGTCTACCGGGCAAACGAACAAAGACAAAATACTGTAGACCACTCGACTCGA  
CGAGCTAATTCTCCAGTTAGAGAACAGGAGCAATTGGCTAATACTTCGCGTCGATCGACACGCAGACAAG  
ACCCAGTCTACCGGGCAAACGAACAAAGACAAAATACTGTAGACCACTCGACTCGACGAGCTAATTCTCC  
AGTTAGACAACAGGAGCAATTGGCTAATACTTCGCGTCGATCGAGACGCAGAGAAAACCCAGTTTATAGG  
GCAGACGAACAAGAACAAGACAATATTCGTCGAGCTCGCCATCGACAAGACATACAACGACGACTTTTA  
GAAAGAGCTAGGGATAGGAATCAAAGATCACAGGTTAGAGAGAATCCGATTCGTAGGATAATTGAGCAG  
GCACGTAACACAAGTGTGAGGCGAAGTGCTCGCATTTCATGCACGACAGGAGGCTTTTGACGCCAATAGAA  
GTTTGTCCCAGCGAGTTAGCCAGTATAGGGGTAATACAGGTAATAGGATAGCAGAGAATAGGCGCAATGC  
TACGAGGAACAGGGGTGAACGTGCGATTAATTTTTTCAGAGGATAGAATCTCTCCAGCTATTAGGAGTAGC  
TTAGATGGTCTGATAGCTGGATTCAATAGAACAGTTAAGCAGGGTCCCGATCAGGTTTGCCTTTGTTGCGA  
AGGCTTATGGTTTCCACATCAAGTGGAATAAATTTCTCGTGAGGTTATTTTGAAAGCAAGTGTAGTGCGG  
AAGTAAGCTCCGATATTTTATATCTTTCCCTCTATATTTCCCTCTGATAATAATAAATATGATTTTTGCAA  
ACGTGTAGTCGTAGCATTAAATTAGGCAAAAAACCTAAACTTCTATTACAAATGGCCTAGATTTTCCCGA  
TCTGCCAGATTGTTTGAAAGGCTTAACGCCTTTAGAGGAAAGGCTGATTTCCCCTCGCCTTCCTTTCATGA  
TTATTAAGTCATTAGGGATATGGTTCGACAAAATGCAATTAAGGAGCAGTGGTCAATGTACCCATTTCCTG  
TGGCCAATGTTGTAACGTCCCTTCCGAGGGCGTTTAATGAGAGCGAGGTAGTGCAAATTCATCTCAAACG  
TAGGATGGAATATATCCATGATTTTCATGGCTGAAACCATTAGGCCTTCTAAAGTTGCTGAAGCAATAAAA  
TTTTTAGTCAACACCGAGCTTTATAGAAAGCATCAAATTAATTAATGAACAGTGGTTGTCGTCTTTTTTC  
GTCTGACGAGGTTCCGTTTGTGTCATCTGCTGATGACAGGGACTTAGTATCGCAGTTAGTGGCAAGATCTG  
CTCAAGCCTCCATAGATGAGCAGAATAATATAGAAAGAAGATATTAATCCAGGAGGCCAGGAAACATTA  
TTAGAAAACGTCCCTGTGCAAAAATATTGCCATGCAAAGAATAGTTATAGCCCCTGGAGAGGGTCAGCGG  
CCTTTAGACATGATCGAAGATTGTGATTCAGAGGAGCTGGCCTTCCCAACTATTTTTGCTGGCATTAAAGAG  
AAAGTGTGCAGAAAGTTTTACAACCATAGTTAGGTCAGAACTTAGAACTTTGATAGGAGAGGTTGTAGA  
ACAGATAAATTATTTCTCAATTTTAAAAAATTGGAAATGATTAATATAAGGAACAGTACTTCCATTTGCTT  
ACGTAAGCACAGCGCCACTCGAGGCATTACGGCAGCACAAGTCCTTAATGAGGAGTATTTAGAAAATTTA  
ATACGTCACGATGATTGCTATAGGGTTTTGAAAAATATTCGCACTTCACCTGCTCATTGGGAAGGAGAAA  
AGAAGAAGGTCATGGCGATGATAAGGCAGATTGGTCTTCCGACATTTTTTATAACCTTTTCGGCAGCAGA  
GACTAGATGGGCAGAGCTGTTAGTTTTACTTTCTAAGAATGTAGATAAGCTAGAAAATTTCAGAAGAATTG  
GCAGCTAATTTAAGTTTTTGCCAATAAAGCCCGTCTAATTAGAGCCGACCCTGTTACTTGCGCTAGGTATTT  
TGATTTTCGTTACAGGCAGGTTTTTAAACTGATGAAAAAGGAAGGCGGTGTTTTTGGTAGTCACAGAGTT

ATTAAGTATTATTGGCGAGTTGAGTTTCAGCAAAGAGGCTCCCCCACGTTTCATGGCATGTTTTGGCTGAA  
AGATGCTCCGATAGTTGACTTGGCTGATGAGTCAAGCATTCCGTCTGTAAAGTCCTTTATTGATCAGTTTA  
TCACAACTGAAACAAATAACCCGGATGTGGCTCCATTTTTGGAGTATCAAACCTCACAATCACGGGCACTC  
ATGTAGGCGAGAAGTTAGGGCACAAAATATATGTAGATTTGGTATTCCATACCCTCCCATGCCCAAACA  
GAAATTCTATTCCCATTAGAAGAAGATGCTGAAAATAAAGAAGTGCATCGCAGAAATTTTCGAAAAGATT  
AGGGAGTTTTAGAAATATCCGTTTGATCGAGAAAGTATAGATTACCTTAGCGATTTCAATAACTTTTTGACC  
CACGATCAACTTAACTTAAAGTTATGAGTGCTATATAAATGCACTCAGGTTCGAGTATAAAGAAGCCCAAAA  
TATATTTAAAGCGATCATTTCGCAGCAATTAAGCTTAACGCTTATAATACTCACCTCCTTCTACTGCAGCGC  
GCGAATATAGATATCCAGTTTATATTAGATCCCTATGCTTGCTGCAGTTACGTCGTTAATTATATTAACAA  
GTCCAGAGAGGCATTTCAAAGCTAATGCGTGAAGCTGTAAGTGAGATAAGCAGGGGCAATGTAACCTTTA  
AAGCAAAGGTTACAGCATATAGGGCACAAAGTTTATTTTCGGGTACGGAAATATCCGCCCAGGAAGCCGTTT  
ACTGCTGTTTAGGTATGTCTTTGTCCGAAAGCAGTAACGCAGTGGTTTTTATTAATACCTCATTACCAGAG  
AATCGGGTTGGGTTAAGGAAGTCTAAGCAACAGTTGCAAACTTACCCGATGACTCAGTAGCAATATTGG  
AAATTGGACTTATAGACCATTATGTTTCAGCGCCCCGACGCTTTAGATAGTTTATGCCTAGCTGATTTTGCT  
GCTTTTTACAGCTTTAGCAAGCGGCATAGTGGTACTCGCCAAAATATAGATGATGCTGATGACATCGAAA  
CATCCAGGGCTTCCCAGCAATTAGTTTACGCACTTCGCGATGGTAGTGGGTTTCGTAAAGAAGAGGAACAC  
TCCTATTATAATTAGGTATAGGAGATTTAATATTAATACTGATAGGAGCAATTATTTTCGAGAATTAGTTA  
TGTTGTATGTCCCATGGAGGGATGAAAATGTAGAAGTGTAGCAAGAGACTGCGAATCGTTTTGCGGCCA  
GAATCATGAGTTAATTGAGAGCAATCGCAGGAAATACAATAGCTTAAATGACAGTGAGCTTCAGCATGCT  
CTTGAAAATGCAGTGCAGGCAGAAAATGAAGAAAATGTTGAAAATCAAGAAGTAGTAGACGATAGATTT  
CGCGTATTAGGATTACCAGAAATAAATCCTCATTTAAATGTCTTAAACATTAATGGAAATGACGAGAATC  
TAGATTCAGAAGATAACAATGTCCGATTAATAAACTTCCAGCTATAGTTTCAGCTGAAAGCTTAGCAGA  
TATAGTCAGGTCCTTAATTTAAAGCAGAAACTTATTTTACACATGTTTTACACAATGCCAAAAACAAT  
CCGTCTTCTACGAATTTGTTGGAGGTGGTGCGGGTGTGCGAAAGAGCCGACTTATTTTAGCTCTTTTTCAA  
TCTTTGTCCGTTATGTACAATAGTAGGCCAGGAAGTGATCCAAATTCTCCTAAAATAATATTGTGTGCTCC  
AACAGGTAAAGCTGCTTTTCGGAATCAGTGGCTCAACACTGCATTCCATGTTTTCTTACCAGTAAATCAAT  
CTGGTTCCGATTTGAGGGCTTTAAGTAATGATTTAGTAAATACTTTGCATTCAAGGTTAATCGACCTTAAA  
CTAATTATTATAGATGAAATATCTATGGTAGGCTCCAAAATGTTTTCCAGTTGGACTCCCGTTTAAAAAC  
AAATTTTTAAAAATACTTCTCCATTCGGTGGTATTTCTGTCATAGTTTTCGGGGATCTACGACAATTATCTC  
CAGTAGGTGACCGTTGGATTTTCGAATCCAACCTCTAATGATCCCTACAGTGCAATTTATGCTTCATTGCTG  
TGGGACCTTTTCAAGTATTTTGAAGTACAGAAAATAATGCGTCAACGGGAGGACCAACCGTTTGCTTCTGC  
TTTAAATAATATGGCATCGGGAAACATGACAGCCGATGATATTAGTCTTGTCCGATCTCGCATTGTGTCAGC  
AATCGGATGTGCCCGATGATGCCATTCATCTATTTAGTACAAATGCGGCGACAGATAGTTATAACACGAT  
AAAGCTAACTCAATTCCGACTGATCAATTTATTTCTACCGCTGATGATTTTATAAAAGCAACACATTTAA  
CTGCGGCTTGAGACAGAGAATTTTAGAAGCCGTTAGTAGCTTTAGGTCGTCCGAAACACAGGGATTGTG  
CATGTCCCTTCTTCTAAAAACCACTGCGAAATATATGATTACGGTCAATGTAGATACTGGGGATGGATTAG  
TTAATGGGGCAACAGGCATGTTAATGCAAATAGATTTTCGATGCATCCAGCACTCCCATTTATTTATGGATG  
AAATTTTCAGATGATACCGTAGGAGTACTTGCTCGCTCAAAGTGTACACATCGTACAGAACCTTTCTGGAC  
CCCAATTCAGAAAATAGTTAAAAGTTTTCAATATAGAAGAAATGAGCAAGTTTCTATTGACCGCAGACGG  
TTTCCAGTTGTACCTGCAGAAGGTATAACTATTACAAAAGTCAGGGAGCTACGTATAGCAAAGTGGTGG  
TTCACACTTGCTCTCGTATGCAGCGTGCTGCAATATACGTAGCTTGTAGTAGAGCAACAACCTGCTTCCGGG  
TTGTTTATAATAGGAGATTTTGTTCCTCCTAAGCCTCCGAAAAATGACGATAAGGTCCAAAATGAGATAG  
AGAAATTGCGGACTGGAAAACCTACTTCGAACACATTATGATCACTTAGTTAACAGTTCCGCCCTAGACATT  
TTCTTTTATAATACTGAAAGCATTCACTGTCATATTGAAGATATTCGATCAGATAAGCTTATGCTTCAGTC  
GTCTGTTCTATGTTTCGTTGAGGCCTCAACATATTCAAATGAAAATATTGAAATTCAGGGTTTACTGTTGT  
TGTCCGTCTTGATTGCGAGGTAATACCGAATGCACCGCGACCTAAGAGGGGAATCGTCATTTATATTTAA  
AATGCAATTTTAAACAATATATCTAATTGCTTTAGCGGTAGGCAAATTTCTGGGTCATTCGTTTTTTGAGCA  
TGCAATATTTTCGTTATAAGTCTGTATGTTTTTAGTTATTTACAAAAGTCCGTCATATCCGCTTGGTTTTGTTT  
AAAACAGAATTTGAGGTTTTATTTTCAGCAATATTTATTTCTAAGGGAGCGTTGCATTGTTTTAGGAGACTT  
TAATTTATGCTTGAGCAAATTTGATAGATGTAGGGCTCTTTACGATGAATTGCTCAGAAAGGGATTAAAG  
GTGCCTATTAGATTTAAAACGCCCACTACCAATTGTGACTCTCACATTGATTGGGCTTTTTCAAATCTCTCC  
AGTGAGGAAGTTAGCGCTAGGACACTCGAGACAGTGTATAGTTACCACAGTGGTATCTCTCTAACGGTTC  
AGGATAGGGTAAATTAAGTTTCTATATATATGTCTATATAATTACAATATGTTTAATTTAACTTAAGAAT  
TTTTTATGAATATAAATAAATATATTACCTATATTTATATTTAAAGTTGTTTTGTGGTCTTGTACTTGGGT

TCAGGGTATTTTTCTAGTCGGGCACCCCGACTAGAGCACTCTACTT  
>Ref\_dvir\_315  
GACCAAAAAGACGTACCCACCCGGATAGGAGAGATTTTAGAAGAATCAGATGTGGACAGCTGGCGCTGG  
GGTACCATCGGTCTCAAAACGTGGCAGACGATGGTACGAAATGGACCAAAACACCTGAAATTCATGGCTC  
AACCAGGTGGTTCAATGGACCACCATTTTTGTATCTAGAAGAATCGCAGTGGCCACAATCGGAAATAGGC  
CCTGCATTAAACATGTTGTACCATGCTGAAGAACAACCCAATCACACGTCGTCCTGGAGATGTATTCTGCC  
GGATCTGCAGCGTTTCAGCAAGCTAGAAAAATTGAGAGCCGTACAGCTATGCGTACTGGATTTCCTACGG  
AATATTACTAAGAAGGTCAGATTGGACGGAGGACTGGATCTGCAGAAGACGCTGCTCCTTAAAAGAAGC  
AATGAAATGGATGTGATTTTTATCCGGATTTGTCAAGAAGAGGAGTTTTATAGTGAGATCACCTGCTTAAG  
GTCGGGGCGCCGCTTAACCGATCGCAAAAGCTTGCTGTTTAAGTGCTCCCCTTATGTGGATGACTCGGGCA  
TTCTACGTATTAAAGGACGGATAGACAATATAGAAGGAGTCGAAGTCTGCGTAAAACGCCCGATAATTCT  
GCCAAGACGACATCAATTGACGTATCTGCTGGTTGAGTTTTATCACCGCAGATATCATCACCTACACAACG  
AAATCGTCGTAAATGAACTGCGGCAGCGGTACTGGGTTTGTGGCTTACGAGCTTTGGTGAGAGAAGTTTC  
CAATACCTGCCCAGCGTGCCGCATACGACGCGCCCGCCCAAAGCCGCCAGGGATGGGCGACCTGCCAATC  
GAACGATTATCGCCCTATACTCCACCGTTCACATATACTGGAGTGGAATTACTTCGGACCCTACGACATTGT  
CGTTGGACGGCGTCGTGAGAAGCGCTGGGGCGTGCTATTTACATGCCTCACGGTGCGCGCCGTTACCTA  
GATATAGCTACGTCGCTCTCAACTGACTCATACTTATGCGTTCTGAAGTCGTTCTGGCCAGACGCGGCTG  
CCCCCGCCGCATGCTGTCGGACAATGGCACAATTTTCAGAGGCGCTAGCAGAGTATTAAGATGAAATT  
GAACGTATATCGCCGGCTCTGATCGAGCGACAGTACCCAGAACTCGAGTTTACCTTTATCCCGCCAGGATC  
ACCCACATGGGAGGATCGTGGGAACGAATGGTGCGCTCTACAAAGTCAATACTGTCGGAAATTCTGCCG  
CCCTCTGGGTTACGAGAGGAGGTGCTACGAGCAGCATTGGCTGACGTAGAAAGCGTGCTCAACTCAAGGC  
CACTCACTTATGTTCCCTTGGAGACATCTGAGTCCGAAGCCCTGACTCCAAATCATTTTCTTATAGGTCATT  
CAAGCGGATTGCGTGAGAGAGGATTACGGGAGCAAGGCGGAGCTAGCTTGGCACGAGGCTTCCGAGTCG  
CCAGTCAATTGGCTGACCAATTTTGGAAGAGATGGCTGCGCGAGTATCTGCCTACACTACCAGACGTAC  
TAAGTGGTTTCAACCGCCACTCGAACCAATATCAGTCGACGACATCGTCATAATAGTGACGACGGTGCC  
AAGCGAACTGTTGGACAAGAGGAGTGGTCGTAGACGTGCACCGTTCAAAGGATGGCCAGGTCCGAAGT  
GCCGTGGTGCGAACCGCCGATGGAATTATTACTCGCCCCGCCGTCAAGCTAGCTAAGCTTGACATTAAAG  
TTGGTAACACACTGCACGGACGTTTCGTGAATTACGGGGTGGGGAATGTTACGGGGCGAAGTGAAAATAGC  
TAGTTGAACATAAGTCTACTGGGTCTCGCATTTTTCTCTGTAAGCAGCCCTTCGCTGCTTACACTGGAAGC  
GCAACCGTTAGAATTAGTTTTTACATGCATAAGTCGATCGCACGCAGCTGCACAAGCTGCATTTTTTGTGCA  
GGTTCATTTTTCGTTTTTGTGCTTGCAGCTGAGCAGAAGTGAAAGAGAACAGAAGCGCGTGCGGAGCACGAA  
TGTAAGTCTCATAATCATGTAAAATATATGTAGGTTGTTAAATAATGAAAGAATAATAAGATTTTCAGCG  
TTCGAATGTAGTATATTATATCGTACCGCCTCGTACGAATCGAATTGAATCGAGTTGTTTCTTTTCGACGCT  
AGAAGTCCCTGCCGAATACGCGCCCCGGCACGAGTCTCGGTGCCAACATTCTGAAATATTCTCTGCTGCA  
GAGAGTGTCTGAGGGATTCTCTGCTACGGGGAGATTGAGATGGCTGACGGTGATGAACAAGATGCAAGTG  
CGAGAAGGACGACAAGTAGTATTCAACCCGGTGGAAGTCAACGCTTGTAACGGCATGGTCAACGGGAC  
AGGCTAACGGATCGCCTGTCTGCTGGAGTACAAGATAAAGTCGCCGGTGTAAGAAAAGGTAGCGGGGC  
AGCAATCATAGAACTTATAGCGGCTGTCCGTCTACGTCGTCCGCTGCTACTGGTCCAAGGGAAAGTTCA  
ACACCAATGCAGCAAAGAACTGAGAAAGTGGGAGCATTCTTCGACCCTTTGGGATACCAGAACGTGATCT  
ACAAGCAGAAACAGGTTGCGGCTAATTGGAGTGTACACCCAGTTTGCCATATCAAGCAAATACGGCGGT  
GTTTAACCAGGCTACGGAGCCCAGTACTGCCGCGTACATGGGCCACACAGGTCTGGGAGCGCTTAATAGA  
TCGATTGAGCACGTGCCACGGCAGCAATTCGACAATGTACATTGTAATAATGCGACGCCGTGGAATGGAC  
CGCTGACATCTGCGCAAATCAGTGCGCGACACGTAATCAGCAAAGATTTACCAATATTTACTGGCAAACC  
AGAGGAATGGTTGATCTTTATCAGCAATTATGAGCAATCCACAGAGAGATGTGGATTTCAGCAATGAGGAA  
AATCTCATCCGGCTTCAGAAGTGCTCAAAGGGCAAGCCCTGGATGCGGTGCGTGGAAGGCTTATGATAC  
CAGCTACAGTGCCGTATGCTATAGGCACATTGCGAATGCTGTATGGCCGCTCTGAAAATAGTACATGCTG  
CGCTGCAGCAAAAGCTCCGAGAGGAACCAGCAATAAAGTCGGACAACCTGAACACCGTTATCCGACTGG  
CCCTAGCTGTCCAAAACACTACTGCGCAACGATAGCGGCCATTGGTATGCACGAATATCTTTACGATCCCGCG  
CTGCTGAACGAGCTTGTTGCTAAGATGCCCAGCAATATGAAATTGGATTGGGGCCGGCATCGAATGTGCA  
ATGAAGGTAGCAGTTTGGCCACCTTTGATAACTGGCTGTTCAATGTGGCAATGTGCGCCACTATGGTCACG  
CCCTACGAGACACCACTGGCTGATAACGAAAAGAAGAGCTCCACGAAAACCACTAGAGAGCGAATTTTT  
GTGCACAACACGGTAGATAGCCCTGAGGGTTCTCAGCAACAACGTTCAACAACAGGAACAGGAGAGGGTT  
TCATGTGCGAAGTGCGCCGGTAACCAACCGTCTATCAGATTGCGACGACTTCAGATCAATGGGTACAAATC  
AGCGCTGGGAACCTTGTTAAGGAAAAGAGGCTCTGTTTTTGTGCTGCTTTCTACGTCATCGTGACAACAGTGT



AAATCAAAGAAGAAGTGTTCATGTAGATGGTTGCGAGTCAACGACCATGTGCTGCTGCATACGCCTACCA  
TGAGTGGTAGTAAAGTTCGAGCACACGGGCCAAGGTAGCAACCACCGGATTAAGGCAAGTGAGTCTGCCG  
TTATGTTTCACGGCAGCTCCGCAAGTAAGACACTGTTTCGATATGTTCCAATCACGCTCTATAGTAAATCA  
AAAAGCGTGCGCGCATATGCATTAGTGGATGAAGGAGCTGAGTGTACGTTAATAGAAAGAGCGCTTGCA  
GACGAGCTGGAATTAGATGGTCCTGCGACCCAGCTGTGTCTTAAATGGACAGGGGACATAACCAAGAATG  
AACCTGAGTCGATGTCCGTGGCTGTGAGCATTTCAGCTCCAGAACATAACGCAATACAGTATGCCTTAAA  
AAACGTGCGAACAATAGCGAACTTGGACTTACCAGAGCAAAGTATCGGGCCACAGTTGCTCAAGTCTCGG  
AAGCACTTATCTACGCTTCCTATTCATAACAACGTCAAGGCTCAGCTTATCATTGGCTTAGACAATATCAA  
AATAACTGCACCCCTGGAGGATACGAGAAGGTGGAAAACGACGACGTCATAGCAGCGCGAAGCAGACTA  
GGATGGGCTGTATATGGCCGCCCATGGTGGGAGAAAGCACCACGCCTCGGCTGCTACATATTTGCCAGT  
GCAGTGCGGCGCGTGGGATGGATGAAGCTCTGAAGAACTATTTTTCAATTGAGTCACTAGGTGTGAGCGT  
TTCCTCACATCCGCTGAGATCCAAAGAGGACGAACGCTCGATGCAGATTATGGAGGCAACAACAACCTAT  
CTGGAAGACGAAAAGCGCTGGCAGACCGGCCTGTTATGGAGGTTTCGATCGCATGCACCTGCCAGACTCTT  
ATCAGATGGCGGTAAAGCGCCTGAAATGTCTAGAGGCAAAGATGTTCAAAGACCCACCACTGAAAGAGTT  
CATGATGAACACGATGCACGACTACAAACAGAAAGATATCCGCCGGTTGAAGGATAGTGAGTTAGAGCT  
AACACGACATCGTGGTTTTCTTCCTATCTTTACAGTCACCAATCCGAACAAGATAAAGACGCGCTTGGTTTTG  
GGATGCAGCTGCCAAAGTTAGTGGCATGTCGCTGAACGATTGTTTGCTGAAAGGTCCAGATACACTAGCA  
TCTTTGATGGGCGTGCTAATACGCTTCCGAGAGCGTCCTATCGCCGTATCCGGCGACATACGGGAAATGTT  
TCATCAGGTCAAGGTGCGCCGAGAAGACCAACCGGCACAGAAGTTTCTCTGGCGTGATGGAGATTCGTCA  
CGCTTCCCCGAAACATACGTTATGCAAGTCATGACGTTTGGAGCATCCTGCTCGCCAGCTCTAGCAAATTA  
CGTCAAGAATCGCAATGCCGAGCGGTTTGTAGCGGAGCATCCGGATGCCGTAAAGGCGATTTGCGAAAAC  
ACATTTGTGCGACGACTGGCTGCAGTCGGTGGATACTGGAGCTGAAATGATACAGTTAGCTGAGACTGTAA  
AAAGGATTCATGCTAGTGGCGGCTTCGAGATGCGCCGCTGGACATCAAATTCGAAGCAAGTTATACAGGC  
GCTGGAAGACGACTGTGAGGAGTTGGACAAGCGTATCAGCGCTCAGGATGAAGCGCAAGAGAAGGTCTT  
AGGCCTGTGGTGGCTACCTGGACAAGATCTGTTGACGTTTGTGGTGACGCCGAACCTTGCTTGCGAAGGCA  
TCTAAGGAGCGCCCAACTAAAAGACGTGTTCTGAGTGTGATCATGTCTATTTTCGACCCGCTCGGGCTGCT  
AGGATTCTTTAATATACGCGCTAAGATCATCCTTCAGAACATATGGCGATCCAATATCGGATGGGATGAC  
GACCTTACCAACGAAGACGAAGCCGATTGGCAACACTGGCTTGATCTAGTTTCAAATTTGAATGCCGTCC  
GCATTCCACGGTGCATGAAGTGGGTGAGCCGAACCCAGGCTGTGCAGATGCATACATTCGTTGACGCCAG  
TATGAATGCTTACGCCGCGAGTTGTATTTTTGCGGGCTGAACTTGATGGCCAAGTACATTGCAGTTTGGTCG  
CCTCGAAAACGAGAGTAGCACCCCTAAAGCCCTGTCCATACCTCGAATGGAAGTATGGCCGCGGTCTTA  
GGTCTGAGACTGGCCAAATGTATCCAAAAGGAAAATGTGCGTACGCATACATAGACGAACATTCTGGACA  
GATTCAAAGGGATGTGCTCTACTGGATCCGTTCCGATGCTCGAAAGTTCAGCAATTCTGATGCGCTTCGGA  
TAGGAGAGATTTTAGAAGAATCAGATGTGGACAGCTGGCGATTGGGTACCATCGGGCTCAAACGTGGCA  
GACGATGGTACGAAATGGACTAAAACGCCTGAAATTCATGGCTCAACCAGGTGGTTCAATGGACCACCAT  
TTTTGTATCTAGAAGAATCGCAGTGGCCACAATCGGAAATAGGCCCTGCATTAAACATGTTGTACCATGCT  
GAAGAACAACCCAATCACACGTCGTCCTGGAGATGTATTCTGCCGGATCTGCAGCGTTTCAGCAAGCTAG  
AAAAATTGAGAGCCGTACAGCTATGCGTACTGGATTTCTACGGAATATTACTAAGAAGGTCAGATTGGA  
CGGAGGACTGGATCTGCAGAAGACGCTGCTCCTTAAAAGAAGCAATGAAATGGATGTGATTTTTATCCGG  
ATTTGTCAAGAAGAGGAGTTTTATAGTGAGATCACCTGCTTAAAGGTCGGGGCGCCGCTTAAACCGAATCGC  
AAAAGCTTGCTGTTTAAAGTGGCTCCTCCCCTTATGTGGATGACTCGGGCTATTCTACGTATTAAAGGACGG  
ATAGACAATATAGAAGGAGTCGAAGTCTGCGTAAAACCCCGATAATTTTGCCAAGACGACATCAATT

>9\_rnd-1\_family-123\_\_LTR\_\_Pao

TGTCTGGTTACGCAGCCAAAACAACCTGGAGCGACCTCGCAACTGATAAGAGCAGCATCTTAATTTTATCTT  
ATAATACTCGCTCTGCAAAGCAAGTGCCTAAATTTGCTCTTAAGAATTCATTTACATAGAGCTGCCGCTC  
TTCGCTGTAACGATCGTTTTATTGCCCTAGCTTTACTTATGCGAAGGCCTCGATGCTGCGCATCGAGTTAGT  
TAAGTTCGTTTCGCTTCATGCATTTGGTACGCATCGGCCACTTGCATTACTCAAAATTATAACTAATAATTGT  
CTCTTCGCTAAAATTGGCACGTACTAATTCGGGTTTCGCTTGCTTATATACAAACTATTGTTCTTAAATAATA  
AGCACAGACCAATTCGGGTCTGCCTGCTTCTCGTAACTTTAAGAAATATAAAACAATTTTGAACACAAAA  
AATAAATAGTTAATTATTTCTATTTGTGAAAGCTATTGAAAAAGCTCAATAGCGCAACATTTGGTGACCCC  
GACGTGAATTTTATTTTTGTTGTTGTAAGATTATTTGCTTTACATTAAAGCAATAATCTTAAAGGCACCAC  
CTGGCATTTCGTTTTGTGCACTTTATATACATACATACTTATCGCCGTCGCTTTGCCTACTCTCTCGGTTCG  
TTAAAGTCTCTGCTCATTCGTGCGGTACTTATGTAAAAGCTATTGCCGTTGCTTCATTACATAGCTTGACAC  
TTGCGTTTCGCCGAAGTTCTTATTGTACAACCTATTGTTTTTGAACGGTTTGCATGTACTAGCGATCACCGTTG

TTAGTTACTCAGCTAGTTTCGACGCGCTTTCTATCGCGCTTCTAATGGCAACCGAAAAATAATGCCTCTAG  
TGCAGTGCCCTCTGCAAACAGGGTGACCTTTCTGAAGCGCAAAGCCATTTCAATTTATGACAGTTTGCAA  
CACTTCGAAATGCTCTAACTAATTCGCCACTTAGTGCAATTGATGAGTGCGGTCTTAGTGTTAGGCTGAAG  
CAAATCGAGCGGCTTCAGACCTCATTTGATATTACTCACACTAGCCTCGAAGAACTAGACTTTGATGAAAT  
CGGTAACCAATTGCGTGAGGACTTCGACGAGTTAGCAGTTTCTATGGAAATTTCCGGTTCGGAGTGAAATT  
GCGAAACGTGTCTCAATATTGCCCTGCTCAACATTTTCGCGACCAATCTGTGCTGCCCTCGCAGACAGTTAG  
AGCTAAGGCACCGCCAACACTACCCTCAATAAAGTTGCCTACGTTTACGTGGGGTGGTTACACAGAATGGG  
CCGACTTTTATTCTATGTTTACAACCGTCATAGAAAATCATCCTGATCTAGCAGATATCGAAAAGCTGCAG  
CATCTTCGATCGTGCCTGAAGGATACAGCGCTGGACGCGATTTCGATCATTGGAAATAACAAACGATAATT  
ATGCCATAGCACTTAATTTATTGGAGAAAAGGTTTAATAATAGACGTTTGGTTTTTCAGGCACACATACTT  
GAGATATTGGGGCTCAAGAGGGTGGCAGGTGGATCGGCCGTGTCGCTAAGGGAGTTATCCGACCAATTCA  
ACGCACATTTTCGCGCGTTAAAGAGCATGGGGCAACTCCGAACAAATCGCTGGATGCATCATTGTGCAGAT  
TATTTTACAAAAGCTGGACCCAATATCACAAGCCAAATGGGAAGAAAGGCTAGAGGATTCGTCTGTTTCGTT  
AATTTAATACCATCGTGGGAGCATATGGCTACGTTTCTGGAGCAGAGATGCCGAACAATGGAAACCGTAA  
ATTTTGCTATGGCAAGCTATGCCCCCTAGCCATCAGGGTGGGAAAACTAGAGCAATTAACACCAGTAGA  
TCGTCAATTTATCGCCACTAACCACGACGCCCCCTGTCTGCGTCTTTTGTGACAGCCCTGGTCATAGTATATA  
TAATTGTTCTCGATTTGGAAATTTGACCCCTGCATTACGGCTTAGGGAGGCAAAACGAGTTGCATTGTGCT  
TGAATTGCCTAAAGAAAGGTCATCAATTGCGATCATGCAGCTCTGGATGCTGTTCGGACCTGCGGGGCGAA  
ACATCATTCTCTGCTGCATTTAAACAATTCCGTATCTCCGTCTGGTCAGCTGACTGAGCCTGCAAATTCATC  
GCCGATAGCCCATGCCTCTTTTCGCTAAGTCATCGCCATCTACCTCCACATCTCTTGTTCGCCAGTATTTTCA  
TAGTGATGTTGTCTGCTTGGCTACGGCTATGATCTTTGTAAGAAATCGCTCCGGCACCTTTGATACCTTGTCG  
TGCCCTTTTGGATTCTGGTTCTCAGCTTCACCTTATAACGTCGCGCCTTGCTCAACAGCTTCAGCTAAAGAA  
GCACAAGTCCTCAGCCATTGTCTCTGGTCTAGGAGATTCTCGTTTTGAAACAGAAGGAAACACGGTCACT  
ATCACAATACAGTCTCAAGTCTCTGAATACTCAACATGCCTTACAGCTCTGGTAGCGCCTAACATAACTGA  
TAGTCAACCGAGTTTTACTATCAACACGACGAATTGGAACATTCCCGCTAACATAAAACTTGCAGATCCGT  
CTTTCTTTAAACCTCAACGCGTGGACTTGCTACTTGGAGCTAGCCTGTTTTACGACCTTCTCAGCGTCGGCC  
AGATAAGGCTTCTCCCAGGACTACCGTGTCTTCAAAAACACGGCTTGTTGGGTAGTTTCTGGAGGCGGA  
CCCCGCTTGAGTGGTTCTATGTTAATGGCAAAGCATACTGCGGGCAAACCTTGAGTCAAGTTCTGAAGAAC  
GTGCTGATGAATTGGTTCGAAGATTTTGGGAGATAGAATCCTGCTTGGAAGGTACACCTACCACTTCAAA  
GGAAGAAAACATCTGTGAAGAACATTTCTGTAAAGACTCATATCAGATTGCCTAGTGGCCAATATTCAGTT  
CGTTTACCCTTCAAGCGAAGTTTGGAAATGTCTGGGGACGTCATACCAACAAGCCTTTCGTCTGGTTCCTGAC  
CCTGGAACGCAAACCTACAAAATCGTCCAGATCTGAAGATTCAATATTCAAACCTTTCTAAAGGAATATTTG  
GATCTTGGTCATATGTCTGCTGTTGCTCCAGAGTCTATAGGACTTTGTCAATACTTTCTTCCTCATCACTGT  
GTCTTTAAAGAAGACAGTTCAACGACAAAATTGCGAGTCGTTTTTCGACGGCTCAGCAGCTACCTCGTCAG  
GTTATTCATTAAATGAAGTATTGATGGCTGGACCTGTTATTCAAAGCTCGCTGTTTCATATCCTTCTTCGCT  
TTCGTAATTTCCCGATCGCCCTAACAGGAGATATTGGAAAAATGTATCGCTGCGTACGCGTTTCAGCACCG  
GATGATTTTCTCCAATGCATTCTATGGCGAGACTCGCCAGAACAGGATATAAAGATTTTAAAGCTGGATAC  
AGTTACATACGGAACAAAGCCAGCTTCATTCTCTCTATCCGTGCTATGCATCAGCTGTCTATGGATGAGG  
AAACTAATTTTCCAATTGGATCTCGGATTTTTCGGCGTGACTTCTACGTTGATGACCTCATTTTCAAGGGGT  
GATTCAATTCAAGAAGCAAAGGAACCTTCTTAATCAGACGGCTGGAATCTTGGCAAGTGGGGGCTTCAAGT  
TGCGAAAGTGGTGCTCAAACAATTCTGCTGTACTGAAAGGGATACCCGTAGAGGACAGAGAATCTTCCCT  
AAAGTTTGATGATGGTAGCGACATCACCAAACTCTTGGACTCGCTTGGGACTCAGCGTCGGATCGATTG  
TTGTTTTCGTTTTTCGTCCATTTCAGCAGAGATCTAAACCATCAAAAAGGTCAATACTATCGACCATAGCTCG  
CTTGATGACCCGCTTGGACTCATAGGGCCGATAATTGCCAAGGCTAAAATCTTTATGCAGCAGATCTGGA  
AGGAGAAGCTTGAGTGGGACGAGAGCTTGCCATCATCACTGGCAACAGCTTGGCATGATCTTTGCTGCAG  
TTTTGAGAAGGCACAGTTTCTTAAATTTCTCTCGTCTCGTGTCAATACCTGCAGCAGAGTTAGAAGTTCACG  
GTTTCTGCGACGCCAGCATCGAAGCATATGGGGCCTGTGTCTACGTCCTTTCTCGACGAACATCAGCCAGT  
TGTCAGCTGTTGTGTTCCAAATCGCGTGTAGCTCCTCTGAAAACAATCACAGTTCCAAAGCTAGAGCTCTG  
TGGTGCCGTCTTATTATCTAATCTCATGCGTGAGATATCTAAAATGAATCTGTTTCGATGGAAAATTCTACT  
GTTGGTTCGGATTCTTCTGTATGCCTTTCTTGATAAGGACCGAGCCCTGCAAGCTCAATGTGTTTGTGGCT  
AATCGCGTCACAGCAGTTCAAGAGCTAACTAATGGCATGGAATGGCGTTACGTGCCTACTTCACTCAACC  
CGGCAGATATACTCTCGAGAGGATCTACGCCCAGTGAATTAGATCAATCGTCACTGTGGTTCAACGGCCC  
AGAATTTCTAGTTAAAAACAAATTGGACTGGCCTGCTTCTTGCTTGTCAGAAAGGACAGAACTCGAACTT  
AAAAAGGGTCCTTATTGCGTCATCTCCCTTCGTTGATATAACTGTCACCTTGTAATAACGTCAACTCATTG

ATACAATGCAGCGTATATTCGGATATATTTATAAATTCATACACAGAAGCAGGCATCCTGGACTAACAGT  
GTCTGATATACAACATGGGACCCAACCTCTTACTAAGGCTCGTCCAGAGAGCACACCTGTGGGAAGAGATC  
AAATCATTGCAATCGAGAAGAGTTGTTAAACCGTCCAGTTGTATCGCATCACTTAACCCTTTTTGGATGAT  
TTCGGAATTCTTAGAGTTGATGGGCGCTTGAAAACTCTTCGCTGGATTTTCGACGCTCGCCATCCAATAAT  
TCTCCCGTGTCAACCACCCATCACAACTCGGTCATCACACGGTTTCACAATCGGGACTTACACGCTGGTC  
CACGGGCACCTTCTTGCTCATATTCGGTTGCAGTATTGGCCGATTGGTGGAAGGAAGACCGTATCCAAGGT  
GGTTGGAATAATGTGTGAGATGCTTTCGTGCCAAGCCTCGATTAATAGAGCATATAATGGGTGATCTGCC  
AAAGAACGTTTGACTGCTTGTGCGAGCCTTTGAAGTCTCTGGTGTTGACTATTGTGGACCATTTTTCTATAA  
GCCAGACGTACGAAATAAAGCTCCAGTCAAATGTTACATGGCTGTCTTCGTATGCTTCGCGACTAAAGCG  
GTTACCTGGAAGTGGTCAAGGATCTGTGCGACAGCTTCTTTCTTGAATGCGCTTAAGAGGTTTATATCGAC  
TCGAGGCAGGCCATCTCAGATATGGTCGGATAACGCTACCAACTTTGTGCGCGCCAAAAACGAGCTTCTG  
GATCTCAAGCGTCTATTTACAAGTCGTAATCATATTGAGTCAGTGCATAATTTTTGCATGGCTGATTCCATT  
GATTGGAAATTTATACCTCCTCGTTCACCGCATTTTGGCGGCCTTTGGGAAGCAGCAGTGAAGACAGCGA  
AACATCATTTTTATCGTGCTGTTGGATCTTGTGTTCTCAACTTCGAAGAGTTTCGCACCCTAGTCTGCCACA  
TAGCATCGATAATTAATTCCAGGCCATTGTTTCCTCTTTTCTCAGAAGATCCAGCAGATCTAGATGTGCTCACT  
CCAGCTCATTTCTTGATTGGTGGACCCAGCTCATCGTTCTTTGAACCTGATGTGACGCGACCTTCAATTCAAT  
CGTCTGGATGGTTGGCAACGCGTAACGTACCTCCAACAACCTGTTTTGGTCTCGCTGGCGTGAAGAATACTT  
AACACTGCTTCAGCAGCGCTCCAAGTGGCGTACTCCGAAACCAAGCCTATGCGTCAACGACATAGTCCTC  
GTAAAGGATGAAAATCTGCCGCCTCTAAGGTGGCCACTGGCGAGAATCACAGAGCTAATCGTGGGAAAG  
GATGGAGTCGCTCGAGTAGCCATTTTGCACACCGCAACAGGAGAAACGAGAAGAGCTGCAAACAAGCTA  
TGCCTATTGCCCATCAGGGAATCTGTTGAAAGCCCATGCCTTCCAACGGGGGGAATGTCTGGTTACGCAG  
CCAAAACAACCTGGAGCGACCTCGCAACTGATAAGAGCAGCATCTTAATTTTATCTTATAATACTCGCTCTG  
CAAAGCAAGTGCCTAAATTTTCGCTCTTAAGAATTCATTTACATAGAGCTGCCGCTCTTCGCTGTAACGATC  
GTTTTATTGCCCTAGCTTTACTTATGCGAAGGCCTCGATGCTGCGCATCGAGTTAGTTAAGTTCGTTTCGCTT  
CATGCATTTGGTACGCATCGGCCACTTGCATTACTCAAAATTATAACTAATAATTGTCTCTTCGCTAAAAT  
TGGCACGTACTAATTCGGGTTTCGCTTGCTTATATACAACTATTGTTCTTAATAATAAGCACAGACCAAT  
TCGGGTCTGCCTGCTTCTCGTAACTTTAAGAAATATAAAACAATTTTGAACACAAAAAAATAAATAGTTA  
ATTATTTCTATTTGTGAAAGCTATTGAAAAAGCTCAATAGCGCAACA

>9\_rnd-1\_family-214\_\_LTR\_\_Pao

TGTCTGGTTACGCAGCCAAAACAACCTGGAGCGACCTCGCAACTGATAAGAGCAGCATCTTAATTTTATCTT  
ATAATACTCGCTCTGCAAAGCAAGTGCCTAAATTTTCGCTCTTAAGAATTCATTTACATAGAGCTGCCGCTC  
TTCGCTGTAACGATCGTTTTATTGCCCTAGCTTTACTTATGCGAAGGCCTCGATGCTGCGCATCGAGTTAGT  
TAAGTTCGTTTCGCTTCATGCATTTGGTACGCATCGGCCACTTGCATTACTCAAAATTATAACTAATAATTGT  
CTCTTCGCTAAAATTGGCACGTNCTAATTCGGGTTTCGCTTGCTTATATACAACTATTGTTCTTAATAATA  
AGCACAGACCAATTCGGGTCTGCCTGCTTCTCGTAACTTTAAGAAATATAAAACAATTTTGAACACAAAA  
AATAAATAGTTAATTATTTCTATTTGTGAAAGCTATTGAAAAAGCTCAATAGCGCAACATTTGGTGACCCC  
GACGTGATTTTTATTTTTGTTGTTGTAAGATTATTTGCTTTACATTAAAGCAATAATCTTAAAGGGCACCAC  
CTGGCATTTCGTTTTGTGCACTTTATATACATACATACTTATCGCCGTCGCTTTGCCTACTCTCTCGGTCTGC  
TTAAAGTCTCTGCTCATTTCGTGCGGTACTTATGTAAAAGCTATTGCCGTTGCTTCATTACATAGCTTGACAC  
TTGCGTTTCGCCGAAGTTCTTATTGTACAACCTATTGTTTTTGAACGGTTTGCATGTACTAGCGATCACC GTTG  
TTAGTTACTCAGCTAGTTTCGACGCGCTTTCTATCGCGCTTCTAATGGCAACCGAAAAATAATGCCTCTAG  
TGCAGTGCCCTCTGCAAACAGGGTGACCTTTCTGAAGCGCAAAGCCATTTCAATTTATGACAGTTTGCAA  
CACTTCGAAATGCTCTAACTAATTCGCCACTTAGTGCAATTGATGAGTGCGGTCTTAGTGTTAGGCTGAAG  
CAAATCGAGCGGCTTCAGACCTCATTTGATATTACTCACACTAGCCTCGAAGAACTAGACTTTGATGAAAT  
CGGTAACCAATTGCGTGAGGACTTCGACGAGTTAGCAGTTTCTATGGAAATTTTCGGTTTCGGAGTGAAATT  
GCGAAACGTGTCTCAATATTGCCCTGCTCAACATTTTCGCGACCAATCTGTGCTGCCCTCGCAGACAGTTAG  
AGCTAAGGCACCGCCAACACTACCCTCAATAAAGAGTTGCCTACGTTTCAGTGGTGGTTACACAGAATGGG  
CCGACTTTTATTCTATGTTTACAACCGTCATAGAAAATCATCCTGATCTAGCAGATATCGAAAAGCTGCAG  
CATCTTCGATCGTGCCTGAAGGATACAGCGCTGGACGCGATTTCGATCATTGGAAATAACAAACGATAATT  
ATGCCATAGCACTTAATTTATTGGAGAAAAAGGTTTAATAATAGACGTTTGGTTTTTCAGGCACACATACT  
TGAGATATTGGGGCTCAAGAGGGTGGCAGGTGGATCGGCCGTGTCGCTAAGGGAGTTATCCGACCAATTC  
AACGCACATTTTCGCGCGTTAAAGAGCATGGGCAACTCCGAACAAATCGCTGGATGCATCATTGTGCAGA  
TTATTTTACAAAAGCTGGACCCAATATCACAAAGCCAAATGGGAAGAAAGGCTAGAGGATTTCGTCGTTTCGT  
TAATTTAATACCATCGTGGGAGCATATGGCTACGTTTCTGGAGCAGAGATGCCGAACAATGGAAACCGTA

AATTTTGCTATGGCAAGCTATGCCCCTAGCCATCAGGTGGGAAAACTAGAGCAATTAACACCAGTAGAT  
CGTCATTTATCGCCACTAACCACGACGCCCCCTGTCTGCGTCTTTTGTGACAGCCCTGGTCATAGTATATAT  
AATTGTTCTCGATTTTGAAATTTGACCCCTGCATTACGGCTTAGGGAGGCAAAACGAGTTGCATTGTGCTT  
GAATTGCCTAAAGAAAGGTCATCAATTGCGATCATGCAGCTCTGGATGCTGTCGGACCTGCGGGGCGAAA  
CATCATTCTCTGCTGCATTTAAACAATTCCGTATCTCCGTCTGGTCAGCTGACTGAGCCTGCAAATTCATCG  
CCGATAGCCCATGCCTCTTTCGCTAAGTCATCGCCATCTACCTCCACATCTCTTGTGCCCAGTATTTCACT  
AGTGATGTTGTCGTCTTGGCTACGGCTATGATCTTTGTAAGAAATCGCTCCGGCACTTTGATACCTTGTGCT  
GCCCTTTTGGATTCTGGTTCTCAGCTTCACCTTATAACGTCGCGCCTTGCTCAACAGCTTCAGCTAAAGAA  
GCACAAGTCCTCAGCCATTGTCTCTGGTCTAGGAGATTCTCGTTTTGAACAGAAGGAAACACGGTCACT  
ATCACAATACAGTCTCAAGTCTCTGAATACTCAACATGCCTTACAGCTCTGGTAGCGCCTAACATAACTGA  
TAGTCAACCGAGTTTTACTATCAACACGACGAATTGGAACATTCCCGNTAACATAAAACTTGCAGATCCG  
TCTTTCTTTAAACCTCAACGCGTGGACTTGCTACTTGGAGCTAGCCTGTTTTACGACCTTCTCAGCGTCGGC  
CAGATAAGGCTTCTCCAGGACTACCGTGTCTTCAAAAAAACGGCTTGGTTGGGTAGTTTCTGGAGGCGG  
ACCCCGCTTGAGTGGTTCTATGTTAATGGCAAAGCATACTGCGGGCAAACCTTGAGTCAAGTTCTGAAGAA  
CGTGCTGATGAATTGGTTCGAAGATTTTGGGAGATAGAATCCTGCTTGGAAGTACACCTACCACTTCAA  
AGGAAGAAAACATCTGTGAAGAACATTTTCGTAAAGACTCATATCAGATTGCCTAGTGGCCAATATTCAGT  
TCGTTTACCCTTCAAGCGAAGTTTGGAAATGTCTGGGGACGTCATACCAACAAGCCTTTCGTCGGTTCCTGA  
CCCTGGAACGCAAACACTACAAAATCGTCCAGATCTGAAGATTCAATATTCAAACCTTCTAAAGGAATATTT  
GGATCTTGGTCATATGTCGCTGTTGCTCCAGAGTCTATAGGACTTTGTCAATACTTTCTTCTCATCACTG  
TGTCTTTAAAGAAGACAGTTCAACGACAAAATTGCGAGTCGTTTTTCGACGGCTCAGCAGCTACCTCGTCA  
GGTTATTCATTAAATGAACATTGATGGCTGGACCTGTTATTCAAAGCTCGCTGTTTCATATCCTTCTTCGC  
TTTCGTAATTTCCCGATCGCCCTAACAGGAGATATTGGAAAAATGTATCGCTGCGTACGCGTTTCAGCACC  
GGATGATTTTCTCCAATGCATTCTATGGCGAGACTCGCCAGAACAGGATATAAAGATTTTTTAAGCTGGATA  
CAGTTACATACGGAACAAAGCCAGCTTCATTCTCTATCCGTGCTATGCATCAGCTGTCTATGGATGAG  
GAAACTAATTTTCCAATTGGATCTCGGATTTTGGCGCGTGACTTCTACGTTGATGACCTCATTTCAGGGGG  
TGATTCAATTCAAGAAGCAAAGGAACTTCTTAATCAGACGGCTGGAATCTTGGCAAGTGGGGGCTTCAAG  
TTGCGAAAGTGGTGCTCAAACAATTCTGCTGTACTGAAAGGGATACCCGTAGAGGACAGAGAATCTTCCC  
TAAAGTTTGATGATGGTAGCGACATCACCAAACTCTTGGACTCGCTTGGGACTCAGCGTCGGATCGATT  
GTTGTTTTCGTTTTCTGCCATTTCAGCAGAGATCTAAACCATCNAAAAGGTCAATACTATCGACCATAGCTC  
GCTTGTATGACCCGCTTGGACTCATAGGGCCGTAATTGCCAAGGCTAAAATCTTTATGCAGCAGATCTGG  
AAGGAGAAGCTTGAGTGGGACGAGAGCTTGCCATCATCACTGGCAACAGCTTGGCATGATCTTTGCTGCA  
GTTTTGAGAAGGCACAGTTTCTTAAATTTCTCTCGTCTCGTGTCAATACCTGCAGCAGAGTTAGAAGTTCAC  
GGTTTCTGCGACGCCAGCATCGAAGCATATGGGGCCTGTGTCTACGTCCTTTCTCGACGAACATCAGCCAG  
TTGTCAGCTGTTGTGTTCCAAATCGCGTGTAGCTCCTCTGAAAACAATCACAGTTCCAAAGCTAGAGCTCT  
GTGGTGCCGTCTTATTATCTAATCTCATGCGTGAGATATCTAAAATGAATCTGTTCGATGGAAAATTCTAC  
TGTTGGTCGGATTCTTCTGTATGCCTTTCCTGGATAAGGACCGAGCCCTGCAAGCTCAATGTGTTTGTGGC  
TAATCGCGTCACAGCAGTTCAAGAGCTAACTAATGGCATGGAATGGCGTTACGTGCCTACTTCACTCAAC  
CCGGCAGATATACTCTCGAGAGGATCTACGCCAGTGAATTAGATCAATCGTCACTGTGGTTCAACGGCC  
CAGAATTTCTAGTTAAAAACAAATTGGACTGGCCTGCTTCTTGTCTGTCAGAAAGGACAGAACTCGAACTT  
AAAAAGGGTCCTTATTGCGTCATCTCCCTTCGTTGATATAACTGTCACTTGTAAATACGTCAACTCATTG  
ATACAATGCAGCGTATATTCGGATATATTTATAAATTCATACACAGAAGCAGGCATCCTGGACTAACAGT  
GTCTGATATACAACATGGGACCCAACCTTACTAAGGCTCGTCCAGAGAGCACACCTGTGGGAAGAGATC  
AAATCATTGCAATCGAGAAGAGTTGTAAACCGTCCAGTTGTATCGCATCACTTAACCTTTTTTGGATGAT  
TTCGGAATTCTTAGAGTTGATGGGCGCTTGAAAACTCTTCGCTGGATTTTCGACGCTCGCCATCCAATAAT  
TCTCCCGTGTCAACCACCCCATCACAACTCGGTCATCACACGGTTTCACAATCGGGACTTACACGCTGGTC  
CACGGGCACTTCTTGCTCATATTCGGTTGCAGTATTGGCCGATTGGTGGAAGGAAGACCGTATCCAAGGT  
GGTTGGAATAATGTGTGAGATGCTTTCGTGCCAAGCCTCGATTAATAGAGCATATAATGGGTGATCTGCC  
AAAGAACGTTTGACTGCTTGTGAGCCTTTGAAGTCTCTGGTGTGACTATTGTGGACCATTTTTCTATAA  
GCCAGACGTACGAAATAAAGCTCCAGTCAAATGTTACATGGCTGTCTTCGTATGCTTCGCGACTAAAGCG  
GTTACCTGGAACCTGGTCAAGGATCTGTGACAGCTTCTTTCTTGAATGCGCTTAAGAGGTTTATATCGAC  
TCGAGGCAGGCCATCTCAGATATGGTCGGATAACGCTACCAACTTTGTGCGGCCCAAAACGAGCTTCTG  
GATCTCAAGCGTCTATTTACAAGTCGTAATCATATTGAGTCAGTGCATAATTTTTGCATGGCTGATTCCATT  
GATTGGAAATTTATACCTCCTCGTTCACCGCATTTTGGCGGCCTTTGGGAAGCAGCAGTGAAGACAGCGA  
AACATCATTTTTATCGTGCTGTTGGATCTTGTGTTCTCAACTTCGAAGAGTTTCGCACCCTAGTCTGCCACA

TAGCATCGATAATTAATTCCAGGCCATTGTTTCCTCTTTTCAGAAGATCCAGCAGATCTAGATGTGCTCACT  
CCAGCTCATTTTCTTGATTGGTGGACCCAGCTCATCGTTCTTTGAACCTGATGTGACGCACCTTCAATTCAAT  
CGTCTGGATGGTTGGCAACGCGTAACGTACCTCCAACAACCTGTTTTGGTCTCGCTGGCGTGAAGAATACTT  
AACACTGCTTCAGCAGCGCTCCAAGTGGCGTACTCCGAAACCAAGCCTATGCGTCAACGACATAGTCCTC  
GTAAAGGATGAAAATCTGCCGCCTCTAAGGTGGCCACTGGCGAGAATCACAGAGCTAATCGTGGGAAAG  
GATGGAGTCGCTCGAGTAGCCATTTTGCGCACCGCAACAGGAGAAACGAGAAGAGCTGCAAACAAGCTA  
TGCCTATTGCCCATCAGGGAATCTGTTGAAAGCCCATGCCTTCCAACGGGGGGAGAATGTCTGGTTACGC  
AGCCAAAACAACCTGGAGCGACCTCGCAACTGATAAGAGCAGCATCTTAATTTTATCTTATAATACTCGCTC  
TGCAAAGCAAGTGCCTAAATTTTCGCTCTTAAGAATTCATTTACATAGAGCTGCCGCTCTTCGCTGTAACGA  
TCGTTTTATTGCCCTAGCTTTACTTATGCGAAGGCCTCGATGCTGCGCATCGAGTTAGTTAAGTTCGTTTCGC  
TTCATGCATTTGGTACGCATCGGCCACTTGCATTACTCAAAATTATAACTAATAATTGTCTCTTCGCTAAA  
ATTGGCACGTNCTAATTCGGGTTCGCTTGCCTATATACAAACTATTGTTCTTAAATAATAAGCACAGACCA  
ATTCGGGTCTGCCTGCTTCTCGTAACTTTAAGAAATATAAAACAATTTTGAACACAAAAAATAAATAGTTA  
ATTATTTCTATTTGTGAAAGCTATTGAAAAAGCTCAATAGCGCAACA

>9\_rnd-1\_family-183\_\_LTR\_\_Pao  
TGTCTGGTTACGCAGCCAAAACAACCTGGAGCGACCTCGCAACTGATAAGAGCAGCATCTTAATTTTATCTT  
ATAATACTCGCTCTGCAAAGCAAGTGCCTAAATTTTCGCTCTTAAGAATTCATTTACATAGAGCTGCCGCTC  
TTCGCTGTAACGATCGTTTTATTGCCCTAGCTTTACTTATGCGAAGGCCTCGATGCTGCGCATCGAGTTAGT  
TAAGTTCGTTTCGCTTCATGCATTTGGTACGCATCGGCCACTTGCATTACTCAAAATTATAACTAATAATTGT  
CTCTTCGCTAAAATTGGCACGTACTAATTCGGGTTCGCTTGCCTATATACAAACTATTGTTCTTAAATAATA  
AGCACAGACCAATTCGGGTCTGCCTGCTTCTCGTAACTTTAAGAAATATAAAACAATTTTGAACACAAAA  
ATAAATAGTTAATTATTTCTATTTGTGAAAGCTATTGAAAAAGCTCAATAGCGCAACATTTGGTGACCCCG  
ACGTGATTTTTATTTTTGTTGTTGTAAGATTATTTGCTTTACATTAAGCAATAATCTTAAAAGGCACCACC  
TGGCATTTTCGTTTTGTGCACTTTATATACATACATACTTATCGCCGTCGCTTTGCCTACTCTCTCGGTGCTT  
AAAGTCTCTGCTCATTCTGTGCGTACTTATGTAAAAGCTATTGCCGTTGCTTCATTACATAGCTTGACACTT  
GCGTTTCGCCGAAGTTCTTATTGTACAACCTATTGTTTTTGAACGGTTTGCATGTACTAGCGATCACCGTTGTT  
AGTTACTCAGCTAGTTTCGCACGCGCTTTCTATCGCGCTTCTAATGGCAACCGAAAATAATGCCTCTAGTG  
CAGTGCCCTCTGCAAACAGGGTGACCTTTCTGAAGCGCAAAGCCATTTCAATTTATGACAGTTTGCAAACA  
CTTCGAAATGCTCTAATAATTCGCCACTTAGTGCAATTGATGAGTGCGGTCTTAGTGTTAGGCTGAAGCA  
AATCGAGCGGCTTCAGACCTCATTGATATTACTCACACTAGCCTCGAAGAACTAGACTTTGATGAAATCG  
GTAACCAATTGCGTGAGGACTTCGACGAGTTAGCAGTTTCTATGGAAATTTTCGGTTCGGAGTGAAATTGC  
GAAACGTGTCTCAATATTGCCCTGCTCAACATTTTCGCGACCAATCTGTGCTGCCCTCGCAGACAGTTAGAG  
CTAAGGCACCGCCAACACTACCCTCAATAAAGTTGCCTACGTTTCAGTGGTGGTTACACAGAATGGGCCGA  
CTTTTATTCTATGTTTACAACCGTCATAGAAAATCATCCTGATCTAGCAGATATCGAAAAGCTGCAGCATC  
TTCGATCGTGCTGAAGGATACAGCGCTGGACGCGATTTCGATCATTGGAAATAACAAACGATAATTATGC  
CATAGCACTTAATTTATTGGAGAAAAGGTTTAATAATAGACGTTTGGTTTTTCAGGCACACATACTTGAGA  
TATTGGGGCTCAAGAGGGTGGCAGGTGGATCGGCCGTGTCGCTAAGGGAGTTATCCGACCAATTCAACGC  
ACATTTTCGCGCGTTAAAGAGCATGGGCAACTCCGAACAAATCGCTGGATGCATCATTGTGCAGATTATTT  
TACAAAAGCTGGACCCAATATCACAAAGCCAAATGGGAAGAAAGGCTAGAGGATTCGTTCGTTTCGTTAATTT  
AATACCATCGTGGGAGCATATGGCTACGTTTCTGGAGCAGAGATGCCGAACAATGGAAACCGTAAATTTT  
GCTATGGCAAGCTATGCCCCCTAGCCATCAGGTGGGAAAAAACTAGAGCAATTAACACCAGTAGATCGTCAT  
TTATCGCCACTAACCACGACGCCCCCTGTCTGCGTCTTTTGTGACAGCCCTGGTCATAGTATATATAATTGTT  
CTCGATTTGGAAATTTGACCCCTGCATTACGGCTTAGGGAGGCAAAACGAGTTGCATTGTGCTTGAATTGC  
CTAAAGAAAGGTCATCAATTGCGATCATGCAGCTCTGGATGCTGTGCGGACCTGCGGGGGCGAAACATCATT  
CTCTGCTGCATTTAAACAATTCCGTATCTCCGTCTGGTCAGCTGACTGAGCCTGCAAATTCATCGCCGATA  
GCCCATGCCTCTTTTCGCTAAGTCATCGCCATCTACCTCCACATCTCTTGTTGCCAGTATTTTCAGTAGTGAT  
GTTGTGCTCTTGGCTACGGCTATGATCTTTGTAAGAAATCGCTCCGGCACTTTGATACCTTGTCTGTGCCCTT  
TTGGATTCTGGTTCTCAGCTTCACCTTATAACGTCGCGCCTTGCTCAACAGCTTCAGCTAAAGAAGCACAA  
GTCCTCAGCCATTGTCTCTGGTCTAGGAGATTCTCGTTTTTGAACAGAAGGAAACACGGTCACTATCACAA  
TACAGTCTCAAGTCTCTGAATACTCAACATGCCTTACAGCTCTGGTAGCGCCTAACATAACTGATAGTCAA  
CCGAGTTTTACTATCAACACGACGAATTGGAACATTCCCGCTAACATAAAACTTGACAGATCCGTCTTTCTT  
TAAACCTCAACGCGTGGACTTGCTACTTGGAGCTAGCCTGTTTTACGACCTTCTCAGCGTCGGCCAGATAA  
GGCTTCTCCAGGACTACCGTGTCTTCAAAAAACACGGCTTGTTGGGTAGTTTCTGGAGGGCGGACCCCGC  
TTGAGTGGTTCTATGTTAATGGCAAAGCATACTGCGGGCAAACCTTGAGTCAAGTTCTGAAGAACGTGCTG

ATGAATTGGTTCGAAGATTTTGGGAGATAGAATCCTGCTTGGAAGGTACACCTACCCTTCAAAGGAAGA  
AAACATCTGTGAAGAACATTTTCGTAAAGACTCATATCAGATTGCCTAGTGGCCAATATTCAGTTCGTTTAC  
CCTTCAAGCGAAGTTTGGGAATGTCTGGGGACGTCATACCAACAAGCCTTTCGTCGGTTCCTGACCCTGGAA  
CGCAAACCTACAAAATCGTCCAGATCTGAAGATTCAATATTTCAAACCTTTCTAAAGGAATATTTGGATCTTGG  
TCATATGTGCGCTGTTGCTCCAGAGTCTATAGGACTTTGTCAATACTTTCTTCCCTCATCACTGTGTCTTTAA  
AGAAGACAGTTCAACGACAAAAATTGCGAGTCGTTTTTCGACGGCTCAGCAGCTACCTCGTCAGGTTATTCA  
TTAAATGAACTATTGATGGCTGGACCTGTTATTCAAAGCTCGCTGTTTCATATCCTTCTTCGCTTTTCGTAAT  
TTCCCGATCGCCCTAACAGGAGATATTGGAAAAATGTATCGCTGCGTACGCGTTTCAGCACCGGATGATTT  
TCTCCAATGCATTCTGTGGCGAGACTCGCCAGAACAGGATATAAAGATTTTTTAAGCTGGATACAGTTACAT  
ACGGAACAAAGCCAGCTTCATTCCCTCTCTATCCGTGCTATGCATCAGCTGTCTATGGATGAGGAACTAAT  
TTTCCAATTGGATCTCGGATTTTTCGGCGGTGACTTCTACGTTGATGACCTCATTTTCAGGGGGTGATTCAATT  
CAAGAAGCAAAGGAACCTTCTTAATCAGACGGCTGGAATCTTGGCAAGTGGGGGGCTTCAAGTTGCGAAAGT  
GGTGCTCAAACAATTCTGCTGTACTGAAAGGGATACCCGTAGAGGACAGAGAATCTTCCCTAAAGTTTGA  
TGATGGTAGCGACATCACCAAAACTCTTGGACTCGCTTGGGACTCAGCGTCGGATCGATTGTTGTTTTTCGT  
TTTCGTCCATTTCAGCAGAGATCTAAACCATCCAAAAGGTCAATACTATCGACCATAGCTCGCTTGTATGAC  
CCGCTTGGACTCATAGGGCCGTAATTGCCAAGGCTAAAATCTTTATGCAGCAGATCTGGAAGGAGAAGC  
TTGAGTGGGACGAGAGCTTGCCATCATCACTGGCAACAGCTTGGCATGATCTTTGCTGCAGTTTTGAGAAG  
GCACAGTTTCTTAAATTTCCCTCGTCTCGTGTCAATACCTGCAGCAGAGTTAGAAGTTCACGGTTTCTGCGA  
CGCCAGCATCGAAGCATATGGGGCCTGTGTCTACGTCTTTCTCGACGAACATCAGCCAGTTGTCAGCTGT  
TGTGTTCCAAATCGCGTGTAGCTCCTCTGAAAACAATCACAGTTCCAAAGCTAGAGCTCTGTGGTGGCCGTC  
TTATTATCTCTAATCTCATGCGTGAGATATCTAAAATGAATCTGTTCGATGGAAAATTCTACTGTTGGTCG  
GATTCTTCTGTATGCCTTTCCCTGGATAAGGACCGAGCCCTGCAAGCTCAATGTGTTTGTGGCTAATCGCGT  
CACAGCAGTTCAAGAGCTAACTAATGGCATGGAATGGCGTTACGTGCCTACTTCACTCAACCCGGCAGAT  
ATACTCTCGAGAGGATCTACGCCAGTGAATTAGATCAATCGTCACTGTGGTTCAACGGCCCAGAATTTCT  
AGTTAAAAACAAATTGGACTGGCCTGCTTCTTGCTTGTGAGAAAGGACAGAACTCGAACTTAAAAAGGGT  
CCTTATTGCGTCATCTCCCTTCGTTGATATAACTGTCACTTGTAAATACGTCAACTCATTTGATACAATGCA  
GCGTATATTCGGATATATTTATAAATTCATACACAGAAGCAGGCATCCTGGACTAACAGTGTCTGATATAC  
AACATGGGACCCAACCTTACTAAGGCTCGTCCAGAGAGCACACCTGTGGGAAGAGATCAAATCATTGCA  
ATCGAGAAGAGTTGTTAAACCGTCCAGTTGTATCGCATCACTTAACCCTTTTTTGGATGATTTTCGGAATTC  
TTAGAGTTGATGGGCGCTTGAAAACTCTTCGCTGGATTTTCGACGCTCGCCATCCAATAATTCTCCCGTGT  
CACCACCCCATCACAACTCGGTTCATCACACGGTTTCACAATCGGGACTTACACGCTGGTCCACGGGCAC  
TTCTTGCTCATATTCGGTTGCAGTATTGGCCGATTGGTGGAAAGGAAGACCGTATCCAAGGTGGTTGGAAA  
ATGTGTGAGATGCTTTCGTGCCAAGCCTCGATTAATAGAGCATATAATGGGTGATCTGCCCAAAGAACGT  
TTGACTGCTTGTGCGAGCCTTTGAAGTCTCTGGTGTGACTATTGTGGACCATTTTTCTATAAGCCAGACGTA  
CGAAATAAAGCTCCAGTCAAATGTTACATGGCTGTCTTCGTNTGCTTCGCGACTAAAGCGGTTACCTGGA  
ACTGGTCAAGGATCTGTGCGACAGCTTCTTTCTTGAATGCGCTTAAGAGGTTTATATCGACTCGAGGCAGGC  
CATCTCAGATATGGTTCGGATAACGCTACCAACTTTGTGCGGCGCCAAAAACGAGCTTCTGGATCTCAAGCG  
TCTATTTACAAGTCGTAATCATATTGAGTCAGTGCATAATTTTTGCATGGCTGATTCCATTGATTGGAAATT  
TATACCTCCTCGTTCACCGCATTTTGGCGGCCTTTGGGAAGCAGCAGTGAAGACAGCGAAACATCATTTTT  
ATCGTGCTGTTGGATCTTGTGTTCTCAACTTCGAAGAGTTTCGCACCCTAGTCTGCCACATAGCATCGATA  
ATTAATTCCAGGCCATTGTTTCCTCTTTCAGAAGATCCAGCAGATCTAGATGTGCTCACTCCAGCTCATTTT  
TTGATTGGTGGACCCAGCTCATCGTTCTTTGAACCTGATGTGACGCACCTTCAATTCAATCGTCTGGATGG  
TTGGCAACGCGTAACGTACCTCCAACAACCTGTTTTGGTCTCGCTGGCGTGAAGAATACTTAACACTGCTTC  
AGCAGCGCTCCAAATGGCGTACTCCGAAACCAGGCCTATGCGTCAACGACATAGTCCTCGTAAAGGATGA  
AAATCTGCCGCTCTAAGGTGGCCACTGGCGAGAATCACAGAGTTAATCGTGGGAAAGGATGGAGTCGCT  
CGAGTAGCCATTTTTCGCGACCGCAACAGGAGAAACGAGAAGAGCTGCAAACAAGCTATGCCTATTGCCCA  
TCAGGGAATCTGTTGAAAGCCCATGCCTTCCAACGGGGGGGAATGTCTGGTTACGCAGCCAAAACAACCTG  
GAGCGACCTCGCAACTGATAAGAGCAGCATCTTAATTTTATCTTATAATACTCGCTCTGCAAAGCAAGTGC  
CTAAATTTTCGCTCTTAAGAATTCATTTACATAGAGCTGCCGCTCTTCGCTGTAACGATCGTTTTATTGCCCT  
AGCTTTACTTATGCGAAGGCCTCGATGCTGCGCATCGAGTTAGTTAAGTTCGTTTCGCTTCATGCATTTGGT  
ACGCATCGGCCACTTGCATTACTCAAAATTATAACTAATAATTGTCTCTTCGCTAAAATTGGCACGTACTA  
ATTCGGGTTCGCTTGCCTATATACAACTATTGTTCTTAAATAATAAGCACAGACCAATTCGGGTCTGCCT  
GCTTCTCGTAACTTTAAGAAATATAAAACAATTTTGAACACAAAAAAAATAGTTAATTATTCTATTTGT  
GAAAGCTATTGAAAAAGCTCAATAGCGCAACA

>9\_rnd-6\_family-38\_\_LINE\_\_R1

[illegible]





AAATAAAATCNAAAAAATATAAGTCAGAAATATTAATAATTGCAGTAATTGTGCTCCCAACTAACTTTGA  
GTAACACAATTTTTCGTCCATCAGCAATTTTCAATAAACTCTCCTCTGTCAGCATTCAATTTAATTTACCGTT  
GTTGATTTGCCCTTGAAATTGTGTTGTTATTATTGTTGACAAGTATAGTCCATGAACAGCTCGTTTCTCAGG  
TACAGAGACCGCTCTGCGAGGGGATCTGAGTCAGACGACTCCACCACCTTAGATAGGGAAGCCGTCCCGC  
AAAAAATCGCTGACAACAGGTGTAAAATGGGAATGGAGCCTGAGCAGCTTAGGGCTTTGGTGCAGGCCG  
CAGTGGCCTCCGCCTTAGAAGCACAGAGCGCAGTATTGAAGCAAAGAGATGCAGAGCTGAGGGCTTCCTT  
AGACGCTCGGATACAAGAATTGGNAGGCAGAATATACTACCAGTAGTATAGAAACACCGCCGGTCCAGG  
CATTTGAGCCGGTGGAATCAGAAACGACGTCGAATGTAATGAACCGTTGGACGCCGTTAAATGCTTACC  
AGAATTTACGGGGTGCCAGAGACGTACGCCTCTTGGAGACAAGCTGCGATAGCGGCATATAAAATTTACA  
AGCCATACGACGGCAGCTCACGCCACTACCAGGCGGTCAATTATTATTAAGAGCAAAATTAGAGGGGCGAGC  
TGACGGCGTTTTTGGGTCAGTTTGGCACAGTAATGAATTTTGATGCCATAATAAACCGTCTCGATTTACAT  
ACAGGGATAAGAGAGGCATTACGTCGTAGAGCAAGAGATGAGCACCTAAGACAGGGCTCGTTAACAA  
TTTTACAATACTATGACGAGGTTGAGAAAAAGCTTACTCTTCTCACCAATAAGGTCAACATGTCTTATGAA  
CCAAGCATGGCACAAGGGCTCTGTACGAAGTTCAGAGATGATGCGTTGCGTGNNTTTTGTCTCAGGCCTAA  
AGCGTAGCCTGACGGATGTCTGTTCGCGGCAAAGCCTAAGGACTTACCGTCGGCCCTAGCNCTAGCGCA  
AGAGGTAGAGGCAAACCATGAGAGGTACGCCTTTGCCGCTAGCTTCGCTAAAGGGCAAGAAGATAGGGA  
ACGAAAAGTGACCCCGAGGCCGCGAGGTCCGTCAGCAAGATAGGGGTCAACAGCAGGGGGATCCGCAACC  
CAGCGGTTCCAAAAATCCTCGCTTCACTAAACAACAGAAACAGCAACAAAGTCAATTTGAGCAACAGAGT  
GGCAGGTGGAACAAAGGTGGCGGGTCACAGGAACCAATGGACGTCGATCCATCTGTGTGNAAAATTCTAC  
AACCATCGCAAGCACCGCTACGTTAACTCTAGCGCTCCTCAAGCCTACAAAAGAACGGCCACGTCTGG  
GCGTTTAAGCGGACAGAGGAGGCAGAGAGTCAATCACACAGCTCACGAGCCNGATCAAGATTCAGGTTT  
GTATGCTAGCTCTGCAGCAGCAGCAGAACAGCAAATTGCCGACGACAATGGTAGCGGNTATGACTCAGAC  
ACTCTCAATTTTTTAGGGGAAGCTCCCTGCTGCCCTACATCAGTAGGAGAGTAGCAGGGATCCAGATGAG  
GTTTCTCATCGACACGGGCGCTTCCAAGAATTATATCAGGGCCACATAAAAATCTAAAAGGTGTGTGCCCA  
GTAAATTCTCCCTTCTCTACCCATTCTATACACGGCACCACGAAGATCACTCATAAGTGCCTTATATCTCTG  
TTCGGCAAAACTGCCACATTTTTCTTACTCCCAAACCTGTCCACATTTGATGGAATTGTGGGCCTCGACTT  
GCTCACGCAAGCAGGAGTTTCGCTTTGTCTTTCTTCTGGCCAACTCAAATGTGGCGCAGAACTGAACAAA  
TCGAATTCCACAGGTGCGCGGATGTTAACTTTACCAATGTTGACTGCGCCGACGCGCCCGATGCTGTAAA  
AGATGCATTCCTAAAGATGCTAAAAAGCAAACATAAGGCCTTCGCAGATCCGGAAGAAGCACTTCCCTAT  
AACACATCAGTGGTGGCAACCATCAGGACCACTGATGAACAACCAAGTTTATGTCCGACTGTACCCCTACC  
CCATGGGAGCAGCGGAATTCGTTAATAAAGAGATTCAAAGCCTTCTGAAGAACGGTATCATCAAAAAATC  
TGTCTCCCCTACAACAACCCCATTTGGGTGGTGGACAAGAAGGGGACGGACGAGTTTGGTAACAAGAATA  
TGCGCCTNGTAATGGATTTTCGCAAACCTTAACGAGAAAACCATCGCAGACAGATACCCTATGCCTAACAT  
TCCAATGATTTTGGGGAATCTTGGCAAAGCTAAATACTTTTCGACATTGGACCTAAAATCCGGCTATCACC  
AGATCACGCTAGCAGAGCGTGACCGTGAAAAACAGCCTTTGCAGTTAACGGGGGGAAGTACGAATTTTGT  
CGACTTCCCTTTGGGTTGAAGAATGCGGCCAGCATCTTCCAAAGAACTGTTGACGACGTACTGCGTGAGC  
AAATTGGCAAATCTTGCTATGTCTACGTTGACGATGTCATCGTCTTCTCAAAAGACGAAAATTCTCATGTC  
CAACATGTAGAGTGGGTCTTAAAGAGCCTGTACGAGGCAAATATGAGAATCTCCAAGGAAAAATCGCGTT  
TTTTTAAGAAAAGCGTAGGTTTTCTTGGTTTCGTGGTAACCAAGTAATGGAGCTACAACGGACCCCGAAAA  
AGTCAAAGCGATTACAGGAGTTCCAGAACCAAGAATATATTCGAGATCAGATCATTTTTAGGACTGGCC  
AGTTACTATAGGTGTTTCATCAAAGACTTTGCCTCAATAGCAAAACCCATTTCTGATCTTCTAAAGGGCGA  
GAATGGGTCAGTAAGTAAACATAGATCGCGAAACATCCCGGTAGAATTCTCTGAGNTTCAGCGTCACGCA  
TTCCAAAAGCTACGCAACATTTTGTATCAGAAAACGTCATGCTCAGATACCCTGACTTTAAGAAGCCGTT  
TGATCTAACGACAGACGCTTACGCTTACGGCATAGGGGCAGTGCTTTCTCAAGAGGGTCGCCCCATCTCA  
ATGATTTCCAGAACATTGAAACCCCTATATGGGGTACCTATATGGGGTAAAAGACATTAACATTTTCACG  
GACCACCAACCGTTAACTTTTGCCGTTTCTGAGTCAAACCCGAACGCCAAAATTAAGAGATGGAAGGCGC  
GCATTGAGGAAACGAATGCGCGAATATTTTATAAGCCAGGCAAGGAGAATTTAGTTGCTGATGCGCTATC  
GCGACAACAGCTCAACGCTCTTGACGAGCTGAATACTGATTCTGCGCAGCCACAGTCCACAGCGAGCTG  
TCCTTGACCTATACAATTGAGTCGACCGAAAAACCACATTGTTTCCAAAATCAAATTGTCATTGAAGAGGC  
ACGCGTCCCCACCAAACGCAACTTCATTCTTTTCGGGGACAAGAGGCGTCGTGAAGTGAGCTTCGCTGAT  
CGCACAGCCTTTCTAGATGAACTCCTTGACTTGATTAATCCAAATGCGGTTAATGNCCTCTATTGCAACCT  
GCACACACTANCACAGNTGAAGGATGGCTTAGTTTCGCATGTTTCCAGGCACAAAGTTCTGGCACTGCAAA  
AACCGAGTTGCAGATGTCTTCAACGTTGACGAGAGGAGAGAAATTCTCGTTGCCGAACATACTAGAGCGC  
ACAGAGCAGCTCAAGAAAATGTTAAGCAAGTGTTATCAGAATACTATTTCCCTAAAATGGCNAAGTTGGC

TAAAGAAATTGCGGAAAGTTGTAGAATCTGCTNANCAGCCAAATACGATAGGCACCAGAAAAGACAGGA  
GCTGGNAGAACTTCGATCCNTGAGACTCCTGGGGAATTTCTACACATTGATATATTTCCACGGACAAA  
CAATTTTTTTTGNCTGTGTTGATAAGTTCTCTAAATTTGCAGTCGTACAACCAATTCAGTCGCGCACTATC  
GGGACTTAAAAGCTCCACTACTGCAGCNCACGAATTTCTTTCCACGAGCCGGAACAATTTATTGCGACA  
ACGAGCCTTCGATGAATTCTCAAACGATAAAGACCCTGTTGTTAAACAACCTATGGAATCCATATTGTTAAT  
GCGCCGCCGCTGCATAGCACCTCCAATGGCCAAGTCGAGCGCTTCCATAGCACGCTAGCCGAGCTGGCAC  
GTTGTCTCAAGCTGGAGAGAAACATCAGTGACTCAGTCGAAGTCATAATGCTAGCCACGATTGAGTATAA  
CAAGACAATACATTCGGTCATCAACAAGAGACCTGTTGATGCCCTCCATGTGCCNCAGGCGAACCCGAA  
AGGGAAATATCAGCAAAGTTAAGGAGTGCGCAAGATGCGCTCCGGGCTAGGCTGAACGACCAGCGACAG  
AATAGAGTCTTTGAAGTAGGCGAAAAAGTNCTAGTAAAAAGAAACCGCAGGCTTGGCAATAAACTCACG  
CCCTTATGTGAAGAACGGATCGTAGAGGCAGACCTTGGTACGACCGTTCTCATTGGAGGGGAGGGTGGTCC  
ACAAGGACAACCTTAAGTAGGGCGAGAGCTGAAATAAAACATCGATTATATGCATCTCGAATTTAACTAT  
AAGTTTCAACATTTGTGCCACTAGGCTTCACCTTCAAGTTTAAATATTTACGCTACTTGGCATTTCCTTTAG  
GAAGACACGTTGTAATAGTTTGGTCCGTTTTGTCTGTCTTCCGCAGGTTCCGGGTTTCTGCTATTTCTATTTT  
TTGCGGCAGCGCGTGTGACTAATTACTCACACGCCTAAGTATATTTCCATTGTTGAGGGCCAAGTTCTGGT  
CTGGGAGGAATTCAATTTTCGTCAGGCACACAGCAAACATCTCTGAGTACGAGAAAATGGTAAACGAAAC  
AATTGAGCTATGTGAAATGTTTCCGCAGTCACACATGAGAAAGCTTCTAAGCGTAGATGCGTCCCACCTC  
AGAGATCTGTTAGAAGCTCTTGGCGTGCACCACAGGGTGGCAAGAAGTTTAGATTTCTTGGGCACAGCCC  
TCAAAGTAGTTGCGGGAACACCTGACGCCAGTGACTTCGAGAAGATCAAATTCACCGAGTTACAGTTGGT  
GAACTCTAACACAGACAGGTAGCTATCAACACAAAAGTTTCAGGAACAAATCAATCACTCACTACAAGT  
GTCAACACATTACTAAAAGCTGCAAAAAAGAAATCAGATAGATTCCGGGCATTTATACGAAACTCTTTTAG  
CTCGGAATAGAATGTTGCTGATGGAATGCAGAATTTGATGCTCGCTGTTACCCTTGCAAAAATTAATATC  
ATAAGCCCAAATATATTAGATCACGCAGATTTGAAATCTGTTTGGGTCGATGAACCCACAGGTACTTCAAT  
AGCTGACCTTATGTCCGTTGCGTCCGTGAAAGTATTACAATCTGTTAATGCCCTTCACTTTATCATTAAAGT  
CCCGAAAATCAAAATGGCTTGCAGAAAGGTGATGCTGTATCCAGTTGCACATGAGAATGCTGTGCTACAA  
ATTGACGACAACATTATAGCTGAGTGCGGAGATCAAGTGCTTGCCCTTAAGAATTGCACTTCCACGCCGG  
GAGGAACCTTTTGTCAACTTTCACCGACCAGCTCTTGTGCCAGAGAGCTGCATGCTGGTGG  
>9\_rnd-1\_family-207\_\_LTR\_\_Pao  
CTAATAATAGTATCCAGTTACTGACCAACGTAATTATTCGATGCCTTGAGATTGGACATTTGCATAAGCTT  
ACTGGCTACTCTCTCTAAATTGAACGAAAAGAGTTTATTTACTCTATAGTGCTGCCAGTATTGAACGAGGC  
TAGTTTGATCCCAGACCATCAGTTCGGCTTCAGGCGCATCCACGGAACACCGCAACAGTGTCATAGGATA  
GTAGAGCGAATAATGCAGGCATTCGAAGAGAATAAGTACTGCTGTGCTGTCAAGCAAGCCTTTGATAGGG  
TATGGCAGCCCGGTCTACTGCATAATGCATAAAGTCAGAGATTCTCTAGCTACAGTCGGCTGGTGAGGAC  
GACGGCTTGGGTTTTAAAGTTCACGCGTTGGAGCCGTGGACAGAGGACTGAGCTTGAAAGATTTCGGCTTC  
ACCGCTACGGAGTGTGAGAATGCTGAGAACTTGCTGATACGGCGAGCGCAATGCGAAGCGTTGCCTGACG  
AGGTTTCGAGCCTCATACAATGAAGAATCAGTCGGTCATCGAAGAGACATAAGAGGGGCTGGCGCCTTGACG  
TGTATACCAATACGCGTATACGCCCCACAGTGTAGGCCAATAATCCTGTACACACCGGCTCGCACTGACGA  
AACTGATTGTGTATCACTACCATGTAAAAATGAAGCATCAATACATGGATGCAACGATAGGCGACATCAG  
GACCAGATTTTGGATAACAAAGCTGCGTCGACTGTTGCGTACAGTAATATTCATAGTATATAGAGCGCAG  
CCAGGGGCACCTATAATGGGTCATCTGCCAGAGGACCGACTGGAGGCCATTTGGACTATTTTGGACCACT  
CCTTGTGACAATCGGACGTCGAAAAGAAAAGAGATGGGTGCGCTTGCTTACATGCCTGACAACAAGGGCC  
ATACATTTGCACATAATCTGTCAACTAATTCCTGCATAATCGCGATCGGGAATTTTCTTTGCCGTCGCGGA  
CCTGTACTGAGGTTGCGCAGTGACAACGGAAATAACTTTGTTGGAGCCGACAGAGAAGCCAAAAGGCTCA  
TAGACGTATTCGAGNCGGAGAAGATTCAGGGCGAGCTATCTAAAGGCATTGATTGGATCTCCAATTGCC  
AGCGAACCCAGCTGAAGGGGGCGCTTGGGAAAGGATGGTGCAGTGTGTCAAGAGAGTGCTACGCCACAC  
AGTAAGGGAGGTGGCACCAAACCAACACGTACTGGAGAGTTTCCTGATTGAGGCCGAGAGCGTTGTGGAT  
TCTCGCCCGCTTACCACTTACCGAACCAGGGAAACCCCTAACACCGAACGATCTACTCAAAGAAGTGGC  
CAATCTGCCTGACACACCCACTTACAGCCGAACGAGAGACGGGCCACGAGGAAACAGTGGGACACGGCG  
CGTCTGTTACGAGACCGTTTTTGAAGCGGTGGGTCTTAGAGTACCTGCCTGCGCGCGTTGAACCGATACG  
CCATGGTGATATGGTGTGTTGTATGCGACCCGGCCGTGCCACGCAGAGAGTGGCGAAGGGGCATAGTGGAG  
GAGCTCTACCCTGGACCACGCACCAGCGTGCGCGTGGCGGACAACAATCGAGTACGACTGATCACTCGTC  
CTGTGGCTAACTAGCCATACTGGATGTGTGTGAAGCAGGACCTTCACGGGGGCGGAGATGTTGCGGGAC  
GAATTAAGTTATCGATCGTTTAGTATTAAGTATTACATTACTTAAAGGTAAAGCTCATTATTGTCGTGAGTT  
CGAAGGCCGTTGGAGGCAAGACTGCGGTAAAGATTCTAAGGGAATATTTATATCTANGTTTTAACCTATGT

AATCCGTTTCAGAATCCGACTGCACTAGCACGTATTGCATTACGCTGTCTTTATTAACATCGGAGTAACATG  
GCCGGGGGCGCTTGCAGTGTTCAAATAGCAACTGCACCTTCGTTTGGCACGCGACACTTAGTAAACTTTAT  
CTCCCCTGAATAAAATTATGTCCTTAGTTTTAAGTCATATAGCTCTTTATTTTTTTGTTTGCGTAGTTCAAG  
CATGTTTTTTGCTCTTTGGTATGCTACTTCTAATCAATACTTACTTTCTTTAGCGAAATCTTCTATGTTCTAT  
TTAGGTTCTATATTACCTATGGTATCTAGTATTTTCGGCAGATTACTAGTCTTACCAAACTAACTCATATGG  
ACAATAATTATGTGNCACATTTATGATTTATGATGATGATGCCATGAGTCACAATGCACCGCATCAAGCA  
GGTGATACAGTGATGAGTACTGGACGGATGCCGCAGCCAGCGGATCCTCACACAAGGGCACCGCAGTCA  
GTGGATGCTCAATTGACTCAATTGACAAAGGAACCTTAAGTTGTGTGCGATTTCGGATAGAGAACGCCGACTT  
TTCCGCATATTGCCAGTGACGTTGCACGGGGCCAATAAGCTGATCGATACGTACGCGCTCCTTGACGGTG  
ACAAGCGCAAACGTCATGTGTTGCGAAATGTGTACGCCGTGTCCAACCTGAGCTTACCAATGCAAAGCCT  
GCATCGACGTGACGTCCAAATGTGGGGCAACGGTGCACGNCTTCCAATGAAACCGTATCGCGGGGGCGGTA  
CCAAAACCTTCTGATTGGACTTGACCATGCGCATCTTGGACTGCCAATGCAAACAAAAGATTTGCACCAC  
AGGGACCATATGCCGCAGCCACCGAACTTGGATGGGTGGTTTTTGGGGCCGGTAAGAGGTCAACCGACGGC  
AACGTCATCAAAGTCATGCCTCCTAGCAGTGTCGCAGGAGGATGCAATCCAAAAGATGGTAAACGACTAT  
TTTGATATCGAAAACCTTCGCCACCAGTCGCAGCCAGCGACGATGCACGAGCACAGAGGATACTCGAAGAC  
ACCACGGTGAAAATAGGAGAACGTTACCAGACGGGTTTTATTATGGAACCGTGATAATGTTGAGTTGCCAC  
GAAGCTATGATATGGCATACAAAGATTGGTCAACATTGAGAGAAAGATGAAGCGTAACGATCGGTTTA  
AACAAGCCTATATGAAAATTATGGACGATTATGTTTCATAAAGGATATGCTCGACGATTGAAGCAGGCACA  
GGTCGCTTTAGCCAACAGCGACAAACTTTGGTATCTTCCGCACTTTGGAGTTGAAAATCCAAATAAGCCCG  
GTAAGATAAGACTGGTGTTCGACGCGGCAAGCAAAGGTTGGTGATATTTCAATTGAATTCGGCATTATCCA  
AGGGGCCGCGAGCACTATAAGTCGCTGCCGGCTGTTCTCTTCCATTTTCGGGAAGGTGCCGTTGGCGTTTGT  
GGAGACATCCGAGAGATGTTCCATCAAGTGTTGATTCGACCCGAGGATAGATGCGCCCAGCGATTCCCTGT  
GGCGAAACGGCGATGATCGCCGGGAGCCTGATGTTTATGAGATGAGGGTAATGACGTTTGGAGCAGCATG  
TTCGCCAAGCGCCGCGCACTATGTGAAGACCTTGAATGCCCTGCAGTTTCAGGATTACAGACCCTCGCGCG  
GTTAAAGCTATTCTTGAATGCCACTATGTGGACGACTATGTGGATAGTTTTGATAGTGAAGGCGAAGCCAT  
CACCATATCAACAAGAATAAGAGAAATACATGCAAATGCTGGATTTGAATTGTGCCAGTTTACTTCCAGT  
TCGCCAACTGTAGCTGACGCGCTGGGCCAACATGGGGCTGCTAGGAGCATCGGATGGGGCGAAGCTGAA  
GAAAAGATTCTAGGCATGTGTTGGCAACCAGCCACGGACGATTTCAAATTCAACATGAAGTACCACAAAG  
TACCCCGATGTGTGCTAAATTTGGAGCGAATTCCTACGAAGAGGGAATTCCTGAGCTTGATCATGTCAACA  
TTCGATCCTCTGGGATTTCTTAGCTGCCTCATGATAACTGGAAAGTTACTAATGCGTGAGATTTGGCGACG  
AAATGTGCAATGGGATGAACCCTTACCAGATGAGATCGCCCGGGCCTTTAGCAAATGGCTTCAGGATATG  
AACAACGTGGAAGGATTTTCGGAGCTCGCGCCATTACTTCGGCCCAACACCTGTGCGGGCAATACAGCTGC  
ACGTTTTTTGTCGATGCTAGCCAGTCAGCATTTCGCAGCCGTGACTTACTTGAGGGTCACCTACGACAACAAC  
GACGTGCGAGTATGCTTCGTATGTGCCAAGACGAAGTGTGCCCCAATGAAGACGATGTCAATTCCACGAC  
TGGAATTGCAAGCAGCCGTGTTAGGAACGAGGCTGATGGACACTGTCAAAAAGGAGCACAGTATAGCGA  
TCAGCGACGCTATACTATGGACTGACTCCAAAACNGTGCTGCGTTGGATAGGCAGCACCCACCGTCGATA  
TAAGCAGTTCGTTCGGAATTCGAGTGGGAGAAATTTTGGAGTCAACAAAGGTTTCCCAATGGAGATGGGTA  
CCTACTGCTGAAAATGCAGCAGACGACGCAACGAGGCCGCATTGCCACGTAGACCTCAGCCAACGGTCAC  
GATGGTTAGACGGGCCAACATTTTTGCGGCAGCCGGAAAGCAGCTGGCCGCAGTCCGAACCGGGCACGG  
AACACTCATCCTACGAAGATGAAGAAGAGATGCCGAGTGAATTTGCCTTAGTTGCAGCAAATAACTTTTT  
CATTTTCATTTACAGAGATTCTCTAGCTACAGTCGGCTGGTGAGGACGACGGCTTGGGTTTTAAGGTTACACGC  
GCTGGAGCCGTGGACAGAGGACTGAGCTTGAGAGATTCGGCCTCACCGCGACGGAGTGTGAGAACGCTG  
AGAATTGCTGATACGGCGAGCGCAATGCGAAGCGTTCCTGACGAGGTTTCGAGCCTCATACAATGAAGA  
ATCAGTCGGTCATCGAAGCGACATAAGAGGGCTGGCGCCNTACTTGGATGACAATGGAGTCTTGCGTGCG  
TATGGCAGGATCGATGCCGCACTGTGTATACCGCATAGTGCGAGAAGGCCAATAATATTGTCACACCGGC  
ACGCACTGACGGAACCTGATTGTGTATCACTACCATGTGAAAATGAAGCATCAAAACGTGGATGCAACGAT  
AGGCGACATCAGGACCAGATTTTTGGATAACAAAGCTGCGTCGACTGTTGCGTACAGTAATATCTGGATG  
TAGTGTGTGCAAACCTACATAGAGCGCAGCCAGCGCCACCTATAATGGGTCCTTTGCCAGAGGACAGACTG  
GAGGCCAATGGATGGCCATTTAAGTTTACGGGTCTGGACTATTTTGGACCACTCCTTGTGACGATCGGACG  
TCGAAAGGAAAAGAGATGGGTGCGCTTGTTTACGTGTCTGACGACAAGGGCCATACATTTGGAGCTGGCA  
CATGACCTGTCAACTGATTCCTGCATAATCGTAATCAGGAACCTTTCTTTGCCGTCGCGGACCTGTACTGAG  
GTTGCGCAGTGACAACGGAAAGAACTTTGTTGGGGCCAACAGAGAAGCCAAAAGGCTAATAGATGTATT  
CGAGCCGGAGAAGATTCAGGGTGAGCTATCTTCTAGAGGCATTGAATGGATCTTCAACTGCCCAGCGAAC  
CCAGCTGAAGGGGGAGCCTGGGAAAGGATGGTGACGTGTGTCAAGAGAGTGCTACGCCACACAGTAAAG

GAAGTGGCACCAAAGCAACACGTACTGGAGAGTTTCTGATTGAGGCCGAGAACGTTGTGAATTCTCGCC  
CGCTTACCCACTTGCCGGTGTCTGTGGACCAGGAAGCCCCCTAACACCGAACGATCTACTCAAAGGAGT  
GGCCAATCTGCCTGACACGCCCCTATCCACGAGCAGCCGAACGAGAGATGCGTCACGAGGAAGCAGTG  
GCGCATGGCGCGGCTGTTACGAGACCGTTTTTGGAAAGCGGTGGGTCTTAGAGTACCTGCCTACACTTGTGC  
GACGCGTGAAATGGTGTGCGCGCGTTGAGCCGATACGCCATGGTGATATGGTGTATATGCGACCCCGC  
CGTGCCACGCAGAGAGTGGCGAAGGGGCATAGTGGAGGAGCTCTACCCTGGACCAGATGGAGTGCCTCG  
ACGCGCCAGCGTCCGCGTGGCGGACAACAACCGAGTGCGACTGATGACTCGTCCCGTGGCTAAACTAGCC  
ATACTGGATGTGAGTGAAGCAGGGCCTTCACGGGGGCGGGGATGTTGCGGGACGAATTAATTTATCGATT  
GTTTAGTATTAAGTATATTCTGAAAGTATGTATATTTGCCCTCCGAATGTACGGGCACACTGTATTTGGCTT  
GTTGCCGCCATTACTTAAATGTAAAGCTCATTATTGTCGTGAGTTCGAAGGCCGTAGGAGGAAAGACTGC  
GGTAAGATTCCGAGGGAATATATATCTAAGTTCTAACCTATGTAATCCGTTTAGAATAAAACACTTGCCT  
AGCACGTTTTTGCATTACGCTGTCTCTAGTAACATCGGAGTAACATGGCCGGGGGCCAGGCGTAAACTTGC  
AGTGTTCAAATTGCAACTCCACCTTCATTTGGCACGCGACA

>9\_rnd-4\_family-199\_\_RC\_\_Helitron

GCAGACAAGACNTAGTCTACCGGGCAAACGAACAAAGACAAAATACTGTAGACCACTCGACTCGACGAG  
CTAATTCTCCAGTTAGAGAACAGGAGCAATCGGCTAATACTTCGCGTCGATCGACACGCAGACAAGACCC  
AGTCTACCGGGCAAACGAACAAAGACAAAATACTGTAGACCACTCGACTCGACGAGCTAATTCTCCAGTT  
AGAGAACAGGAGCAATTGGCTAATACTTCGCGTCGATCGACACGCAGACAAGACCCAGTCTACCGGGCA  
AACGAACAAAGACAAAATACTGTAGACCACTCGACTCGACGAGCTAATTCTCCAGTTAGAGAACAGGAG  
CAATTGGCTAATACTTCGCGTCGATCGACACGCAGACAAGACCCAGTCTACCGGGCAAACGAACAAAGAC  
AAAATACTGTAGACCACTCGACTCGACGAGCTAATTCTCCAGTTAGACAACAGGAGCAATTGGCTAATAC  
TTCGCGTCGATCGACACGCAGACAAGACCCAGTCTACCGGGCAAACGAACAAAGACAAAATACTGTAGA  
CCACTCGACTCGACGAGCTAATTCTCCAGTTAGANAACAGGAGCAATTGGCTAATACTTCGCGTCGATCG  
ACACGCAGACAAGACCCAGTCTACCGGGCAAACGAACAAAGACAAAATACTGTAGACCACTCGACTCGA  
CGAGCTAATTCTCCAGTTAGACAACAGGAGCAATTGGCTAATACTTTGCGTCGATCGAGACGCAGAGAAA  
ACCCAGTTTATAGGGCAGACGAACAAGAACAAGACAATATTCGTCGAGCTCGCCATCGACAAGACATAC  
AACGACGACTTTTAGAAAGAGCTAGGGATAGGAATCAAAGATCACAGGTTAGAGAGAATCCGATTCGTA  
GGATAATTGAGCAGGCACGTAACACAAGTGTGAGGCGAAGTGCTCGCATTTCATGCACGACAGGAGGCTTT  
TGACGCCAATAGAAGTTTGTCCAGCGAGTTAGCCAGTATAGGGGTAATACAGGTAATAGGATAGCAGAG  
AATAGGCGCAATGCTACGAGGAACAGGGGTGAACGTGCGATTAATTTTTCAGAGGATAGAATCTCTCCAG  
CTATTAGGAGTAGCTTAGATGGTCTGATAGCTGGATTCAATAGAACAGTTAAGCAGGGTCCCGATCAGGT  
TTGCCTTTGTTGCAAAGGCTTATGGTTTCCACATCAAGTGGAATAAATTTCTCGTGAGGTTATTGAAAGCA  
AGTGTAGTGCAGAAGTAAGCTCCGATATTTTATATCTTTCTCTATATTTCCCTCTGATAATAATAAATATG  
ATTTTGGCAAACGTGTAGTCGTAGCATTAAATTAGGCAAAAACCTAAACTTCTATTACAAATGGCCTA  
GATTTTCCCGATCTGCCAGATTGTTTGAAAGGCTTAACGCCTTTAGAGGAAAGGCTGATTTCCCTCGCCT  
TCCTTTTCATGATTATTAAGTCATTAGGATATGGTCGACAAAATGCAATTAAAGGAGCAGTGGTCAATGTAC  
CCATTCCCTGTGGCCAATGTTGTAACGTCCCTTCCGAGGGCGTTAATGAGAGCGAGGTAGTGCAAATTCAT  
CTCAAACGTAGGATGGAATATATCCATGATTTTCATGGCTGAAACCATTAGGCCTTCTAAAGTTGCTGAAGC  
AATAAAATTTTGTAGTCAACACCGAGCTTTATAGAAAGCATCAAATTACTATTAATGAACAGTGGTTGTCGT  
CTTTTTCGTCTGACGAGGTTCCGTTTGTGTCATCTGCTGATGACAGGGACTTAGTATCGCAGTTAGTGGCA  
AGATCTGCTCAAGCCTCCATAGATGAGCAGAATAATATAGAAGAAGATATTAATCCAGGAGGCCAGGAA  
ACATTATTAGAAAACGTCCCTGTCGAAAATATTGCCATGCAAAGAATAGTTATAGCCCCTGGAGAGGGTC  
AGCGGCCTTTAGACATGATCGAAGATTGTGATTCAGAGGAGCTGGCCTTCCCACTATTTTGTGCTGGCATT  
AAGAGAAAGTGTGCAGAAAGTTTTACAACCATAGTTAGGTCAGAACTTAGAAACTTTGATAGGAGAGGTT  
GTAGAACAGATAAATTATTTCTCAATTTTAAAAAATTGGAAATGATTAATATAAGGAACAGTACTTCCATT  
TGCTTACGTAAGCACAGCGCCACTCGAGGCATTACGGCAGCACAAGTCCTTAATGAGGAGTATTTAGAAA  
ATTTAATACGTCACGATGATTGCTATAGGGTTTTGAAAAATATTCGCACTTCACCTGCTCATTGGGAAGGA  
GAAAAGAAGAAGGTCATGGCGATGATAAGGCAGATTGGTCTTCCGACATTTTTTATAACCTTTTCGGCAG  
CAGAGACTAGATGGGCAGAGCTGTTAGTTTTACTTTCTAAGAATGTAGATAAGCTAGAAATTTCAGAAGA  
ATTGGCAGCTAATTTAAGTTTTGCCAATAAAGCCCGTCTAATTAGAGCCGACCCTGTTACTTGCGCTAGGT  
ATTTTGATTTTCGTTACAGGCAGGTTTTAAACTGATGAAAAAGGAAGGCGGTGTTTTTGGTAGTCACAGA  
GTTATTAAGTATTATTGGCGAGTTGAGTTTCAGCAAAGAGGCTCCCCACGTTTCATGGCATGTTTTGGCTG  
AAAGATGCTCCGATAGTTGACTTGGCTGATGAGTCAAGCATTCCGTCTGTAAAGTCCTTTATTGATCAGTT  
TATCACAACCTGAAACAAATAACCCGGATGTGGCTCCATTTTTGGAGTATCAAACCTCACAATCACGGGCAC

TCATGTAGGCGAGAAGTTAGGGCACAAAAATATATGTAGATTTGGTATTCCATACCCTCCCATGCCCAA  
CAGAAATTCTATTCCCATTAGAAGAAGATGCTGAAAATAAAGAAGTGCATCGCAGAAATTTCGAAAAGAT  
TCAGGGAGTTTTAGAAATATCCGTTTGATCGAGAAAGTATAGATTACCTTAGCGATTTCAATAACTTTTTGA  
CCCACGATCAACTTAACTTAAGTTATGAGTGCTATATAAATGCACTCAGGTCGAGTATAAAGAAGCCCAA  
AATATATTTAAAGCGATCATTTCGCAGCAATTAAGCTTAACGCTTATAATACTCACCTCCTTCTACTGCAGC  
GCGCGAATATAGATATCCAGTTTATATTAGATCCCTATGCTTGCTGCAGTTACGTCGTTAATTATATTAAC  
AAGTCCCAGAGAGGCATTTCAAAGCTAATGCGTGAAGCTGTAAGTGAGATAAGCAGGGGCAATGTAACCT  
TAAAGCAAAGGTTACAGCATATAGGGCACAAAGTTTATTTCTGGGTACGGAAATATCCGCCCAGGAAGCCGT  
TACTGCTGTTTAGGTATGTCTTTGTCCGAAAGCAGTAACGCAGTGGTTTTTTATTAATACCTCATTACCAGA  
GAATCGGGTTGGGTTAAGGAAGTCTAAGCAACAGTTGCAAACTTACCCGATGACTCAGTAGCAATATTG  
GAAATTGGACTTATAGACCATTATGTTTCAGCGCCCCGACGCTTTAGATAGTTTATGCCTAGCTGATTTTGC  
TGCTTTTTACAGCTTTAGCAAGCGGCATAGTGGTACTCGCCAAAATATAGATGATGCTGATGACATCGAA  
ACATCCAGGGCTTCCCAGCAATTAGTTTACGCACCTTCGCGATGGTAGTGGGTTTCGTAAAGAAGAGGAACA  
CTCCTATTATAAATTAGGTATAGGAGATTTAATATTAATACTGATAGGAGCAATTATTTTCGAGAATTAGTT  
ATGTTGTATGTCCCATGGAGGGATGAAAATGTAGAAGTAGTAGCAAGAGACTGCGAATCGTTTTTGCGGCC  
AGAATCATGAGTTAATTGAGAGCAATCGCAGGAAATACAATAGCTTAAATGACAGTGAGCTTCAGCATGC  
TCTTGAAAATGCAGTGCAGGCAGAAAATGAAGAAAATGTTGAAAATCAAGAAGTAGTAGACGATAGATT  
TCGCGTATTAGGATTACCAGAAATAAATCCTCATTAAATGTCTTAAACATTAATGGAAATGACGAGAAT  
CTAGATTCAGAAGATAACAATGTCCGATTAATAAACTTCCAGCTATAGTTTCAGCTGAAAGCTTAGCAG  
ATATAGTCAGGTCACCTAATTTATAAAGCAGAAAATTTTACACATGTTTTTACACAATGCCAAAAAA  
ACAAATCCGTCTTCTACGAATTTGTTGGAGGTGGTGCGGGTGTCGGAAAGAGCCGACTTATTTAGCTCTT  
TTTCAATCTTTGTCCGTTATGTACAATAGTAGGCCAGGAAGTGATCCAAATTCTCCTAAAAATAATATTGT  
GTGCTCCAACAGGTAAAGCTGCTTTCGGAATCAGTGGCTCAACACTGCATTCCATGTTTTCTTACCAGTA  
AATCAATCTGGTTCCGATTTGAGGGCTTTAAGTAATGATTTAGTAAATACTTTGCATTCAAGGTTAATCGA  
CCTTAAACTAATTATTATAGATGAAATATCTATGGTAGGCTCCAAAATGTTTTTCCCAGTTGGACTCCCCG  
TTTAAAAACAAATTTTTTAAAAATACTTCTCCATTCCGGTGGTATTTCTGTCATAGGTTTTCGGGGATCTACGA  
CAATTATCTCCAGTAGGTGACCGTTGGATTTTTTCGAATCCAACCTCTAATGATCCCTACAGTGCAATTTATG  
CTTCATTGCTGTGGGACCTTTTCCAAGTATTTTTGAACTCACAGAAATAATGCGTCAACGGGAGGACCAAC  
CGTTTGCTTCTGCTTTAAATAATATGGCATCGGGAAACATGACAGCCGATGATATTAGTCTTGTCCGATCT  
CGCATTTGTCAGCAATCGGATGTGCCCGATGATGCCATTCATCTATTTAGTACAAATGCGGCGACAGATAG  
TTATAACACGATAAAGCTAAACTCAATTCCGACTGATCAATTTATTTCTACCGCTGATGATTTTATAAAAG  
CAACACATTTAACTGCGGCTTGTAGACAGAGAATTTTAGAAGCCGTTAGTAGCTTTAGGTCTGTCGAAAC  
ACAGGGATTGTGCATGTCCCTTCTTCTAAAAACCACTGCGAAATATATGATTACGGTCAATGTAGATACTG  
GGGATGGATTAGTTAATGGGGCAACAGGCATGTTAATGCAAATAGATTTTCGATGCATCCAGCACTCCCAT  
TATTTTATGGATGAAATTTTCAGATGATACCGTAGGAGTACTTGCTCGCTCAAAGTGTACACATCGTACAG  
AACCTTTTCTGGACCCCAATTCAGAAAATAGTTAAAAGGTTTTCAATATAGAAGAAATGAGCAAGTTTCT  
ATTGACCGCAGACAGTTTCCAGTTGTACCTGCAGAAGGTATAACTATTCACAAAAGTCAGGGAGCTACGT  
ATAGCAAAGTGGTGGTTCACACTTGCTCTCGTATGCAGCGTGCTGCAATATACGTAGCTTGTAGTAGAGCA  
ACAACCTGCTTCCGGGTTGTTTATAATAGGAGATTTTGTTCCTCCTAAGCCTCGAAAAATGACGATAAGGTC  
CAAAATGAGATAGAGAAATTGCGGACTGGAAAAACTACTTCGAACACATTATGATCACTTAGTTAACAGT  
TCCGCCCTAGACATTTTCTTTCATAATACTGAAAGCATTCAGTGTATATTGAAGATATTTCGATCAGATAA  
GCTTATGCTTCAGTCGTCTGTTCTATGTTTCGTTGAGGCCTCAACATATTCAAATGAAAATATTGAAATTCC  
AGGGTTTACTGTTGTTGTCCGTCTTGATTGCGAGGTAATACCGAATGCACCGCGACCTAAGAGGGGAATC  
GTCATTTATATTAATAAATGCAATTTTAAACAATATATCTAATTGCTTTAGCGGTAGGCAAATTTCTGGGTC  
ATTCGTTTTTGTAGCATGCAATATTTTCGTTATAAGTCTGTGTATGTTTTTAGTTATTTACAAAAGTCCGTCAT  
ATCCGCTTGGTTTGTTTAAACAGAATTTGAGGTTTTATTTTCAGCAATATTTATTTCTAAGGGAGCGTTGCA  
TTGTTTTAGGAGACTTTAATTTATGCTTGAGCAAATTTGATAGATGTAGGGCTCTTTACGATGAATTGCTC  
AGAAAGGGATTAAAGGTGCCTATTAGATTTAAAACGCCCACTACCAATTGTGACTCTCACATTGATTGGGCT  
TTTTCAAATCTCTCCAGTGAGGAAGTTAGCGCTAGGACACTCGAGACAGTGTATAGTTACCACAGTGGTAT  
CTCTCTAACGGTTCAGGATAGGGTAAATTAAGTTTCTATATATATGTCTATATAATTACAATATGTTTAATT  
TAAACTTAAGAATTTTTTATGAATATAAATAAATATATTACCTATATTTATATTTAAAAGTTGTTTTGTGGT  
CTTGTACTTGGGTTTCAAGGTATTTTTCTAGTCGGGCACCCCCGACTAGAGCACTCTTACTTGTTTT  
>160\_rnd-1\_family-354\_\_LTR\_\_Pao  
TGTTACGGGGCGAAGTGAAAATAGCTGTTGACTAAGTCCTACTGGGTCTCGCATTTTTTCTGTAAGCAGCC

CTCGCTGCTTACACTGGAAGCGCACCGTTAGAATTAGTTTTTACATGATAAGTCGATCGCACGCAGCTGCA  
CAAGCTGCATTTTCGTCGAGGTTCATTTTCGTTTTGTGCTTGCAGCTGAGCAGAAGTGAAAGAGAACAGAA  
GCGCGTGCGGAGCACGAATGTAAGTCTCATAATCATGTAAAATATAGGTTGTTAAATAATGAAAGAATAA  
TAAAGATTTTCAGCGTTTCAATTATATTATATCGTACCGCCTCGTACGAATCGAATCGAATCGAGTTGTTTC  
TTTCGACGCTAGAAGTCCCTGCCGAATACGCGCCCCGGCGCGAGTCTCGGCGCCAACATTCTGAAATATTC  
TCTGCAGCAGAGAGTGTCCGAGGGATTCTCTGCTACGGCGGAGATTTCTGCGAAGCAAGCGACTTGCAAA  
GTCACAACCTTAGCTGCCTATAGAGAGACACGTGGTACAAGAGCTAGACTCACACTTAGCAGCCATAACC  
TCAAAGCGGATTTTCATAGTATTGGTGTGGCGAGATGGCTGACGGTGATGAACAAGATGCAAGTGCGAGAA  
GGACGACAAGTAGTATTCAACCCGGTGGAACCTGCAACGCTTGTAACGGCATGGTCAACGGGACAGGCTA  
ACGGATCGCCTGTTCTGCTGGAGTACAAGATAAAGTCGCCGGTGTAAGAAAAGGTAGCGGGGCGAGCAA  
TCATAGAACTTATAGCGGCTGTCCGTCTACGTCGTCCGCTGCTACTGGTCCAAGGGAAAGTTCAACACCG  
ACGCAGCAAAGAACTGAGAAAGTGGGAGCTCTTTTCGACCCTTTGGGATACCAGAACGTGATCTACAAGC  
AGAAACAGGTTGCGGCTAATTGGAGTGTACACCCAGTTTGCCGTATCAAGCAAATACGGCGGTGTTTAA  
CCAGGCTACGGAGCCCAGTACTGCCGCGTACATGGGCCACACAGGTCTGGGAGCGCTCAATAGATCGATT  
GAGCACGCGCCGCGGCAGCAATTCGACAATGTGCATTGTAATAATGCGACGCCGTGGAATGGATCGCTGA  
CACCTGCGCAAATCAGCGCGCGACACGTATCAGCAAAGATTTACCAATTTTTACAGGCAAACCAGAGGA  
ATGGTTGATCTTTATCAGCAATTATGAGCAATCCACAGAGAGATGTGGATTCAGCAACGAGGAAAATCTC  
ATCAGGCTTCAGAAGTGCCTCAGAGGGCAAGCCCTGGATGCGGTGCGCGGGGAAAACCTTATGATCCCAGC  
TACAGTGCCGTATGCTATAGGCACATTGCGAATGCTGTATGGCCGCTCTGAAATAGTACATGCTGCGCTGC  
AGCAAAAGCTACGAGAGGAACCAGCAATAAAGTCGGACAATTTGAACACCGTTATCCGACTGGCCTTAGC  
TGTCAAAACCTACTGCGCAACGATAGCGGCCATTGGTATGCACGAATATCTTTACGATCCCGCGCTGCTGA  
ACGAGCTTGTGCTAAGATGCCAGCAATATGAAATTGGACTGGGGCCGGCATCGAATGTGCAATGANGG  
TAGTAGTTTGGCCACCTTTGATAACTGGCTGTTTAATGTGGCTATGTGCGCCACTATGGTCACGCCCTACG  
AGATACCACGGACTGATAACGAAAAGAAGAGCTCCACGAAAACCACTAGAGAGCGAATTTTTGTGCACA  
ACACGGTAGATAACCTGAGGGTTCGCAGCAACAGCGTTATCAACAGGAACAGGAGAGAGTTTCATGTGC  
GAAGTGCGCCGGTAACCACCGTCTNTCAGATTGCGACGACTTTAGAGCCATGGGTACAAAACAGCGGTGG  
GAACTTGTTAAGGAAAAGCGGCTCTGCTTTTGCTGCTTTATGCGACATCGTGCAACAGTGTAACAA  
AGAAGAAATGTCACGTGGATGGTTGCGAGTCAACGCACCATGTACTGCTACATACGCCTACCACGAGCGG  
TAGTAAAGNCGAGCACACGGGCCAAGGTAGCAACAACCGGACTAAGTCAANGGAGTCTGCCGTTATGTTT  
CACGGCAGCTCCGCAAGTAAGACACTGTTTCGATATGTTCCAATCACGCTCTATAGTAAATCAAAAAGCG  
TGCGCGCATATGCATTAGTGGATGAAGGAGCTGAGTGTACGCTAATAGAAAGAGCGCTTGCAGACGAGCT  
GGAAGTAGATGGTCCNGCGACCCAGCTGTGTCTTAAATGGACAGGNGACATAACCAAGAACGAACCTGA  
GTCGATGTCCGTGGCTGTGAGCATTTACAGCTCCAGAACATAACGCGATACAGTATGCCTTAAAAAACGTG  
CGAACAATAGCGAACTTGGACTTACCAGAGCAAAGTATCGGGCCACAGTTGCTCAAGTCTCGGAAGCACT  
TATCTACGCTTCCCATTCTGCCGTATAACAACGTCAAGGCTCAGCTTATCATCGGCTTAGACAACATCAA  
ATAACTGCACCCCTGGAGATACGAGAAGGTGAAAACGACGACGTCATAGCAGCGCGAAGCAGACTAGGA  
TGGGCCGTATATGGCCGCCCATNGTGGGAGACAGCACCACGCCTCGGCTGCTACATATTTGCCAGTGCA  
GTGCGGCGCGTGGGATGGATGAAGCTCTGAAGAACTATTTTTCAATTGAGTCACTAGGTGTGAGCGTTTCC  
TCACATCCGCTGAGATCCAAAGAGGACGAACGCTCGATGCAGATTATGGAGGCAACAACAACCTATCTGG  
AAGACGAAAAGCGCTGGCAGACCGGCCTGTTATGGAGGTTTCGATCGCATGCACCTGCCAGACTCTTATCA  
GATGGCTGTTAAGCGCCTGAAATGTTTAGAGGCAAAGATGTCAAAGACCCACCACTGAAAGAGTTCATG  
ATGAACACGATGCACGATTACAAACAGAAGGGATATATCCGCCGGTTGAAGGATAGTGAGTTAGTAGCTA  
ACACTACGTCGTGGTTTCTTCTTACAGTACCAATCCGAACAAGAAAAAGACGCGCCTGGTTTGG  
GATGCGGCCGCCAAAGTTAGTGGCACGTCGCTGAACGATTGTTTGCTGAAAGGCCAGATACTAGCAT  
CTTTGATGGGGGTGCTAATACGCTTCCGAGAGCGTCTTATCGCCGTATCCGGCGACATACGGGAAATGTTT  
CATCAGGTCAAGGTGCGCCGAGAAGACCAACCGGCACAGAAGTTTCTCTGGCGTGATGGAGATTTCGTAC  
GCTTCCCCGAAACGTACGTTATGCAAGTCATGACGTTTCGGAGCATCCTGCTCGCCAGCCCTAGCAAATTAC  
GTCAAGAATCGCAATGCCGAGCGGTTTGTAGCGGAGCATCCGGATGCCGTAAAGGCGATTGTGCGAAAACA  
CATTTGTCGACGACTGGCTGCAGTCGGTGGATACTGGAGCCGAAATGATGCAGTTAGCTGAGACTGTAAA  
AAGGATTCATGCTAGTGGCGGCTTCGAGATGCGCCGCTGGACATCAAATTCGAAGCAAGTTATGCAGGCG  
CTGGAAGACGACTGTGAGGAGTTGGACAAGCGTATCAGCGCTCAGGATGAAGCGCAAGAGAAGGTCTTA  
GGCCTGTGGTGGCTACCTGGACAAGATCTGTTGACGTTTGTGGTGACGCCGAACTTGCTCGCGAAGGCAT  
CTAAGGAGCGCCCACTAAAAGACGCGTTCTGAGTGTGATCATGTCTATTTTCGACCCGCTCGGGCTGCTA  
GGATTCTTTAATATACGCGCTAAGATCATCCTTCAGAACATATGGCGATCCAATATCGGATGGGATGACG

ACCTTACCAACGAAGACGAAGCCGATTGGCGACACTGGCTTGATCTAGTTTCAAATTTGAATGCCGTCCG  
CATTCCACGGTGCATGAAGTGGGTGAGCCGAACCCAGGCTGTGCAGATGCATACATTTCGTTGACGCCAGT  
ATGAATGCTTACGCCGCAGTTGTATTTTTGCGGGCTGAACTTGATGGCCAAGTACATTGCAGTTTGGTCGC  
CTCGAAAACGAGAGTAGCACCCCTAAAGCCCGTGTCCATACCTCGAATGGAAGTATGGCCGCGGTCTTA  
GGTCTGAGACTGGCCAAATGTATCCAAAAGGAAATGTCGGTACGCATACATAGACGAACATTCTGGACAG  
ATTCAAAGGATGTGCTCTACTGGATCCGTTCCGATGCTCGAAAGTTCAGCAATTCGTAGCGCTTCGGATN  
GGAGAGATTTTAGAAGAATCAGATGTGGACAGCTGGCGCTGGGTNCCATCGGCTCAAAACGTGGCAGAC  
GATGGCACGAAATGGACCAAAACGCCCGAAATTCACGGCTCAACCAGGTGGTTCAATGGACCACCATTTT  
TGTATCTAGAAGAATCGCAGTGGCCACAATCGGAAATAGGCCCTGCATTAAACATGTTGTACCATGCTGA  
AGAACAACCCAATCACACGTCGTCCTGGAGATGTATTCTGCCGGATCTGCAGCGTTTCAGCAAGCTAGAA  
AAATTGAGAGCCGTACAGCTATGCGTACTGGATTTCTTACGGAATATTACTAAGAAGGTCAGATTGGACG  
GAGGACTGGATCTGCAGAAGACGCTGCTCCTTAAAAGAAGCAATGAAATGGATGTGATTTTTATCCGGAT  
TTGTCAAGAAGAGGAGTTTTATAGTGAGATCACCTGCTTAAAGGTCGGGGCGCCGCTTAACCGATCGCAA  
AGCTTGCTGTTTAAAGTGCTCCCCTTATGTGGATGACTCGGGCATTCTACGTATTAAAGGACGGATAGACAA  
TATAGAAGGAGTCGAAGTCTGCGTAAACGCCCGATAATTCTGCCAAGACGACATCAATTGACGTATCTG  
CTGGTTGAGTTTTATCACCGCAGATATCATCACCTACACAACGAAATCGTCGTAAATGAACTGCGGCAGC  
GGTACTGGGTTTTGTGGCTTACGAGCTTTGGTGAGAGAAGTTTCCAATACCTGCCCAGCGTGCCGCATACGA  
CGCGCCCGCCCAAAGCCGCCAGGGATGGGCGACCTGCCAATCGAACGATTATCGCCCTATACTCCACCGT  
TCACATATACTGGAGTGGATTACTTCGGCCCCCTACGACATTGTCGTTGGACGGCGTCGTGAGAAGCGCTG  
GGGCGTGCTATTTACATGCCTCACGGTGCGCGCCGTTACCTAGATATAGCTACGTCGCTCTCAACTGACT  
CATACTTATGCGTTCTGAAGTCGTTCTGTGGCCAGACGCGGGCTGCCCCCGCCGCATGCTGTCGGACAATGGC  
ACAAATTTTCAGAGGCGCTAGCAGAGTATTAAGATGAAATTGAACGTATATCGCCGGCTCTGATCGAGC  
GACAGTACCCGGAAGTTCGAGTTTACCTTTATCCCGCCAGGATCACCCACATGGGAGGATCGTGGAACG  
AATGGTGCGCTCTACAAAGTCAATACTGTGCGGAGATTCTGCCGCCCTCTGGGTTACGAGAGGAGGTGCTA  
CGAGCAGCATTGGCTGACGTAGAAAGCGTGCTCAACTCAAGGCCGCTCACTTATGTTCCCTTGGAGACAT  
CTGAGTCCGAAGCCCTGACTCCGAATCATTTTCTTATAGGTCATTCAAGCGGATTGCGTGAGAGAGGCTTA  
CGGGAGCGAGGCGNAGCTAGCTTGGCACGAGGCTTCCGAGTCGCCAGTCAATTGGCTGACCAATTTTGA  
AGAGATGGCTGCGCGAGTATCTGCCTACACTACCAGACGTACTAAGTGGTTTCAACCGCCACTCGAACC  
AATATCAGTCGACGACATCGTCATAATAGTGGACGACGGTGCCAAGCGAAACTGTTGGACAAGAGGAGT  
GGTCGTAGACGTGCACCGTTCGAAGGATGGCCAGGTCCGAAGTGCCGTGGTGCGAACCGCCGATGGAATT  
ATTACTCGCCCCGCCGTCAAGCTAGCTAAGCTTGACATTAAAGTTGGTAACACACTGCACGGACGTTCTGTG  
AATTACGGGGTGGGGAATGTTACGGGGCGAAGTGAAAATAGCTGTTGACTAAGTCCTACTGGGTCTCGCA  
TTTTTTCTGTAAAGCAGCCCTCGCTGCTTACACTGGAAGCGCACCGTTAGAATTAGTTTTTACATGATAAGT  
CGATCGCACGCAGCTGCACAAGCTGCATTTTCGTGCGAGGTTCAATTTTCGTTTTGTGCTTGCAGCTGAGCAG  
AAGTGAAAGAGAACAGAAGCGCGTGCGGAGCACGAATGTAAGTCTCATAATCATGTAAAATATAGGTCG  
TTAAATAATGAAAGAATAATAAGATTTTCAGCGTTCGAATTATATTATATCGTACCGCCTCGTACGAATCG  
AATTGAATCGAGTTGTTTCTTTCGACGCTAGAAGTCCCTGCCGAATACGCGCCCCGGCACGAGTCTCGGTG  
CCAACA

>Ref\_Telemac

CTGTGTAGTTGCAAGCTTTTTTGTCAACCAATTAATTCTAACTGCTTGTGCAGCGAAATTCAAACACTTAGA  
TTAGTTTTCAAATGGATTTATTTGCCGCGCAGGGCACTTATTAGAATTTATAAGTTTTAAATTGTTGCTTGG  
CAGCCAAGTTCGAATTAGTTGTGCCTAGGTTGCGATCAAAACGAAAGACTGACTGGTTATAACAATATGTA  
AAGCGAATCGAAACGAAACTCCAATAAGACGCTCGCCGGTTAGAGCGAAGGGCAGCAATGCAAGCAAAG  
CAATTCAGAAGGAGAGTGGACAGCAGCTTACAAAGAGCGCGCAAAAAAACTATTTGCTCTTAGGCTGTA  
ATTATGATTGTTATTTTCTGCTGTTGGATGATGTCCGCAGCCGTCGGTGTTATCTCTGCTGTTACTTGACCA  
AACATTCTCCCCCGTTGGAAGGCAAGGGCTTTCAACATCATCTGTTTGGGCAGCAAACACAGCTTTTCGT  
ACAGCTCTACGTATGACTCCAGTCGCAGTTTGAAGCACAGCAACTCTGGATACCCCATCAGATCCAGAGA  
TCAGCTCTTGCACTCTGGCGAGTGGCCACTTCAGCGGCGGTAGATTCTCATCCTTTACAAGGACAACATCG  
TTAATGGAGAGTCCAGGCTGAGGAGTGCGCCATTTGGAGCGCTGTTGAAGAAGCGTCAAATACTCTTCGC  
GCCAACGGGGCCAGAAATACTTGTGTTGGGAGATATGTGACGGCGCTGAAAATAATTAAGCCCGATTGAAGT  
TAAGCTGCCTTAGATCGGGCTCAATGTATGATGAAGATGGCGCTGTACCCAGGAAGTGTGCGGGTGTCAA  
GACGTCAAGATCACCTGGATGCTCTGAAAGTGGAAGTAATGGTCGAGAATTAATAATTGCCGTGATGTGG  
CAGACGAGCGTACGCAGCGAATCGAAATCCAAAATGGAAGAGCAAACAGATCGATAAAAGTGGTGCTTA  
GCAGTCTTCACAGCGGCTTCCCATAGTCCACCAAAGTGCGGAGAGCGAGGAGGGATGAACAACCATTCAA

TTGATTCGGTTAGGCAAACTCGTTAACGGCCTTGACATGCTCGTCTCTCAGGAACAGGCGGTTTCAGATCT  
GCTAGTTCGTTCTTGGCACCTACGAAGTTTGTGCGCATTGTCAGACCAGATCCTTGAAGGTCGAGAGCGAGT  
CAGGATGAAACGTTTTAGGGCGTTTAGAAACGATGTTGTGGACAAGTCCTTTACAAGCTCTAAGTGCACC  
GCCTTTGTAGCGAAGCATATGAACAGACTGATATAGCATTTCCTGGTGGCCTGTTGCGCACTTCGTTCTT  
GTAGTAAAATGGTCCACAGTAATCAACGCCAGTGACCCATAAAGGGGATACGATGTTATTAAGACGATCA  
GCTTGGTAGGTTCTGCCATTATATGCTTCGGCCAATCGTGGCTTGGCACGGAAAACAGATTATGCATTTGG  
CAACAATACTGGAGACTGTTTTTCGACCGCCAATGGGGCCAGTACTGGAGCCGAATCGAAGACAATAAAGC  
GCGAGGTCCAGCGTGTAAGTTTCGTTTATGAAAGTAAACTATGATTGCTCGCGTCACAGGATGCTGACGG  
GGCAATATAATCGGATGTCGCGCTGAGAAGTCCAACGACGAGTTTTTCAGCCGTCCACCGATGCGAAGTA  
GGCCGAAGTCGTCAAGGAATGGTGCAAGAGAGGGCCATTGAGCTAGACGGTTTGACATGCCTTCCTTCCTT  
CAATGCCTTGAGTCATCGCTGAGAGTAGCCATTTGCACTGACCGCAGCAACCAATGTGTGCCATGATGC  
AAGTGGTCAACGGTTAGTTCAGCTCCTCGGATTTCGATTTACAAATTTGTAAACATAAGCAAAGACCCGCT  
GCAGCTTGGAACGAATTGATGAACTTGCAACCAATCGAGAGATCCGGTTGCGCTGCAGTTCGAGGAG  
TACCTTGTGTCGAAGTTCTGGTAAGGATTCGACAGGTACACAGGAGGCAGGCCACTCTTCCTTTCCCTTAC  
TGAGAAAACCTCGGACCATGGGCCCATAATGGAGACCGGAAGAGCTCACTAGGCAGCGCTCCTCGTGAAA  
TTATATCCGCCGGGTTTAATTCGGTGGAATATGATGCCATTCCATTCCAGTGGTGAGCTCTTGGATGGCT  
GCGACTCGGTTGGCAACGAAAACATTGAATTTGCAAGCATCATTGCGAATCCAAGCCAAAGTCACGGCAG  
AGTCTGACCAACAGTAATACCGACAGTCGAACACTTTCAATTTGGCATATTTGCTGAGAAGTTGAGCCAGT  
AATGCAGCTCCGCAGAGTTCCAGCTTTGGTACCGTGATGGTTTTACAGGCGCGACACGCGATTTGGAGC  
ATAAGAGACGCACGCTGGTGTGGCCATTGCACTTTGAGACTGTATAGACGCATGCTCCATAAGCGCTTAG  
GCTGGCATCACAAAATCCGTGAATCTCCACTGTACTGTCTGATGAGAGTGCTCGACGGGGATACTGGAAT  
TGCTGAGTATACTCAAAATCAGCGCAGAAGTTGACCCAGGCTGTGCTTAAGTGTACGGGCAGGCTCTCAT  
CCCAGTCCAGCCTTTCTCTCCAGAGATCCTGCATAAAAATTTTCGATTTTGTATTACGGGACCAACAAGA  
CCAAGGGGGTCGTAAAAGCGAGCAATTGCGGAGAGTATTGACCGTTTTGTGAGTCTGGAGGGCAACCTCA  
GTGGAGAGAAGGAGAAAAGGAAACAGTCTGAAGCGGGATCCCAAACGAGGCCTAACGTTTTCGTGATGT  
CACTGCCATCGTCAAACCTTAAGCAGCGTTTTCTCTATCCTCTTCCGGATATGTTTTGGAGTACAGAATGTGT  
CGCTAGAACACCATTTGCGCCAGCCTAAAGTTCCCTTGGCGAGTAGTCCAGATGTTTGTTCATATCT  
CAATTGCTTCTTGAACACAGCTACCACCAGAAATGAGGTATCCACGTAGAAATCTCTTTTAAACAATGTCA  
GAGCCAATAGGGAAAGTTTTCTGCTCATCCATGGCCAGTTGGTGCATAGCTCGCACTGAGAGAAACGATG  
CTGGTTTTGTGCCGTAGGTGACGGTGTCTAATTTGTAAATCTGTATCTTCTGATGCTGAGACTCACGCCAC  
AAGATACATTGAAAATAACTGTCTGCGGGTTCGACTCGTACGCATCGATACATTTTGCATATATCGCCTGT  
CAGGGCGACTGCAAATGTACGAAACCGCATCAGTATCGAAAACAGCTTCGGTTGGATGGTAGGACCTGCC  
ATCAGTGCATCATTCAGCGAGTGTCCAGAGGTAGTAACTGCTGAGCCATCAAACACGACCCTTAGCTTGG  
TTGTAGTGCTATCCTCCTTCAGCACGCAGTGATGTGGCAGGTAGTACTTGCATTGGCCCAGTGCAGCTGAG  
GTAACAAGTGACATGTGACCCAAGTCAAGATACTCCTTGATAAATGCTGCATACTGGGGTTTCAATAGTG  
GATTACGGTCTAGTTTTCTTTCTAAGTTCAGGAATCGACGAACCGCCTGTTGATAGGAGTCACCCAGCGGA  
TACATGCCTAGACGTAGCGGTAAACGAACCTGAATAGTCGCCAGTCGACAGACGTTTAAAATTGGCCTGAA  
AGTGTGCCTCACAGTCGCGTTCCTCCTTGTGGTAAGGACTCAGGGTTCGGTGCAGCATTCCAATTCCTCAA  
AAACGACGGATTAATTCATCAATCTGTGTATTAGGCTGCAGATGCGAGTCAACCAGCAGATCTGGATTCT  
CCATTGATCTCATGGCCATGAATGATGATTTTCCAGCATGTGAGGCACCTCCCGTAGCCACCCAACCAAGG  
CGAGTCTTTTGCAATATCGGCAGTCCAGCAGCTAGTTTAATCTGGCCGACGCATAGCAGATCGAAGAACA  
GACTGGCTCCAATCAACATGTCGATTTGCTGAGATTTAAAGAATTCAGGATCAGCTAGTTGTATATTTGAT  
GGAATGTTCCATGATGCAGGGTCAAGAGTGAAGCCAGGCTGATTATCGGTGATGGATGGTGCAATCAAGG  
CCGGGATGCATGTGGAGTACTCCGACACTCGAGATTTGACATTGATGTTGACCGAAAACCCATCGGACGC  
AAATGCTGCATCACCAATGCCAGAGACGATTACTGTTGACTTGAATTTGCGCAGCTGGAGCTGATGAGCA  
AGACGAGAGGTGATGATGTGCAACTGCGACCCAGAGTCGAGCAACGCACGGCAAGGCACCAAGGAGCCA  
GCGCGATTTTTACGTTGATGACGGCAGTGGCAAGCAGGACCACATCGTGCTTGAGATGCTGGGCGGTAG  
TGAGAGGCGAAGATAAAAAGTGCCGCCAAGGTGTTTTGGGATGACGAATAAGTTTCGGTATCTTGAGCATT  
GTTTGGGCTAGAAGCAGCGATGTGACTGCTTGTGTTGCCAAGATGCAACAAGCTATGATGTTTGCTTCCAC  
AAACTCTGCAAGCGCTGGAGCCGCAGACTCTCAGCTGATGTCCCCTTTGCAGGCAGTTTAGGCACAGCGC  
AAGCCGCTTGGCTTCGTGAAGGCGCAGCAAGGGCGATAAATTTGCGAATTGCAAACATTTATAAATAGAG  
TGGCCTGCGACTTCACAAAACACACAAGCACTCGTTCCATTCTAGTCACTACAAACGTTCTTCTACTACT  
GTTGTTCTGGCCCACCTGGGAGCTAGGCGGTGTACATTGCCGTAGCGTGATCCGCATTTTCCAGCCTTTGGC  
AACGCCTCTCTATGAAGGTTGTAAACCGCTCGCATGATGGTATGACGTCCAACGGCGCATCATCCTCCCAG



CTAGCCTGCGTAACGCTATCTAGTTTTTGCAGCAACGTATGTACTATGACGCAACCGGCGATCTGTTCCAC  
ACTGCCCATCGATTTTAAAGCACGTAGATGAGAGTTGAGCTTATCTGAAAATTTCGCGCAGCTGTGCAGTC  
GCGCCCTTGTCCACCTTTCTCAAACCCAAAATTTTCAGAGATGTGTGCCTGAAAAATAAGACGCTTGTTATT  
AAAACGCTTATCAAGCAGTTCTAAAAGCGGCAGCATAATTTGCGTTTGAAATTTCCAATGAGCGAATTGT  
ATCCAGCGCTGTTCCTTTAAAGGCATGACCGTTAGATGCTGGAGTTTTTCAATGTTGGTCAAATACGGATCC  
TTGTCAATGACCGTGGTGAACAGGTTTCGAGAAATCGGCCCATTTCTGTGTAGCCTCCACTAAACTCCGGCA  
ATTTAAGTTGAGGCAATCGAGAGTGGTTTGAACAACAAAGGTAGAACGCGAGTCATCGGCTGCGGCTGA  
ATTGAAGGTGGAACAATGCGGAATCTGCTGAACCTTGCTTCGATTTCCGCGCTCGCGTTGAAGGGACAGC  
CGTAGCTGCCTAATAGTTGACTCAAACTTGTCTGAAGATCCTCATCAACGCTGGCATGATCCACCTCCAA  
CAAACCATCACAGACTATCTCAAATTTTCGCTGCAAGTCAGATGCCATGCTTATGTAATCTTGCAGCTCGT  
AGTCATCAACATCGCGAAGTCGAGCGGGATCAAGTTCCGAGGACAATCTATTGAGTCGATCAGTTAAATT  
CTTGATCTTTATTTTAAAAACAGCAGCCTGGGTTCCAACCGCCACTTGACTAGCTGATGTCGCTCATCAT  
TTCCATTTGCACTTGCACCTTCATCAAACATTATGAATGTAGCGCACACAAGGTTACACAGCCGAACCTA  
CAATACAAGTCTGATCGCGCAAGTGTTTCGTTTCGAGCGAGATAGCGTATAGCGGGTTATAGCGCGCAACGA  
TTAGCGGGGATTTGCTACGGCGTTTATGTATAACAACCAACTGTATGCAGATGCGCAAGCAAACGGCTCA  
CCACACAGCTTTGCCCGAACTGATAACTGTCCGTTGACACGACAAGAACGAAGTACAAGAAAAAATAGA  
AAAAATGAAAGAAAGAAAAATCACGTCGGGGTCACCAAAATGTGTAGTTGCAAGCTTTTTTGCAACCAAT  
TAATTCTAACTGCTTGTGCAGCGAAATTCAAACACTTAGATTAGTTTTCAAATGGATTTATTTGCCGCGCA  
GGGCACTTATTAGAATTTATAAGTTTTAAATTGTTGCTTGGCAGCCAACTCGAATTAGTTGTGCCTAGGTT  
GCGATCAAAACGAAAGACTGACTGGTTATAACAATATGTAAAGCGAATCGAAACGAAACTCCAATAAGA  
CGCTCGCCGGTTAGAGCGAAGGGCAGCAATGCAAGCAAAGCAATTCAGAAGGAGAGTGGACAGCAGCTT  
ACAAAGAGCGCGCAAAAAAACTATTTGCTCTTAGGCTGTAATTATGATTGTTATTTTCTGCTGTTGGATG  
ATGTCCGCAGCCGTCGGTGTTATCTCTGCTGTTACTTGACCAAACAG

>160\_rnd-5\_family-9342\_\_LTR\_\_Gypsy

GGAGCCGGAGGAAGGCCTCCCAAGGCATGGAAAGGGAGCACCTGCTCGGCTACAGAGGGAGTCGGAGGA  
AGGCCTCCCAAGGCATGAAAAGGGAGCACCTGCTCGGCTACAGAGGGAGCCGGAGGAAGGCCTCCCAAG  
GCATGGAAAGGGAGCACCTGCTCGGCTACAGAGGGAGCCGGAGGAAGGCCTCCCAAGGCATGGAAAGGG  
AGCACCTGCTCGGCTACAGAGGGAGCCGGAGGAAGGCCTCCCAAGTCATGANGGGGGCACCTGCTCGGC  
TACAGAGGGAGCCAAAGGCAGGCCTCCCAAGTCATGAGAAGGGAGTACCTGCTCGGCCTTCGACGGAAA  
AGGTCAGGAAAAGGGGAGTAAAGTCCGGCCCCGAATCGACAGCCTGGAGAACCCAAGAGGTGGCGCATAG  
AGCTGCAGAGGCAGACTTCTAATGGCTACGGAAGCGGCACGGCGGGAACGTGCAAGAGAAAGGACGGAG  
TAGGAGCGATGACCAGAATCCACACGGACATAGAAGGCCAGGAGCGATCGCCAGAATCGAGCGGCCACG  
GAGTTCTGTCTGGAGTCGAAGTGGTCCCAGGATGGGGCGATAACGGCATCGAAGAGGCGGATTGGCCAG  
CGGGTCTGGACCCAGAACTGAGGGAGTTCTTGGAGTCAGAGCTGGCTCTCTTCGAGGGGGCTGCAGGGAAT  
CTCGCACATCGCGGAGCACCGAATCCGGCTGAAGGATGACAAGCCGTTGAAACAAAGGTACTACCCCAA  
GAATCCGGCCATGCAGAGGGTGATCGACGAGCAAGTGGATGAGTTGATCCGGGCAAATGCCATCGAGCC  
GTCGCGTAGTCCGCACAGCGCCCCGATCGTCTTGGTCAAGAAGAAGACTGGCGAGTGGCGTATGTGCATT  
GACTACCGACAACCTCAACGCGCATTCATTCCGGACGCTTATCCGGTGCCTCGTATTAACACATCCTGGA  
GCGGTTGCGCCACGCCCCGTTTCATCTCCACTCTGGATTTGAAGCACGGGTACTGGCAGATACCGATGGCA  
GCCGATAGCCGGGAGTGTACGGCGTTTCACAGTCCCTGGAAGAGGTCTTTTCCAATGGCGGGTGATGCCAT  
TCGGCTTACACTCGGCGTGTGCGACATTCCAGCGCGCTTTGGATACGGTAATAGGGCCGCAGATGGAGCC  
TCATGCGTTTCGTTACCTAGACGACATCGTGGTAATAGGAGCGACGAAAACACAGCATGTAGAGAATTTG  
AGGGAGGTATTCCGCCGGCTAAGGGCGGCCAATCTCCGGTTAAATAGAAAAAAATGCAGCTTCTTCCGGG  
AGAGGTTAGTCTACCTAGGACATGTAATTTGCGGAGAAGGGATACGGACCGATCCGGAGAAAGTGGAGG  
CGATACGAAACCTGAGGGCCCCAACAAATTGCAAAGAACTGCGACAGTGTCTCGGGATGGCGTCATGGTA  
CAGGCGTTTTCGTACCCAATTTTCGCGACCCAGGTACAGCCACTCACAGCGCTCTTAAAGAAGGGGCAGAAA  
TGGGCATGGGAGCAAGAACAGGAGGAGGCATTGCGTCAATTGAAGGAGAGCTTGACGACTGCCCCGTGTG  
TTGGCTTGCCCCGACTTTTCCGCCAAGTTTCGTCTTGCAGACTGACGCGAGTGAGTATGGCCTCGGTGCAGT  
GCTGACGCAGACGATCGATGGACAAGAGCGGGTGATAGCATACGCGAGCCGAAAGTTGCTGAAGGCCGA  
GGTAAACTATTCCGCCACTGAGAAAGAGTGCCTGGCAATCGTGTGGTCGATCCGGAAGTTGCGTTGCTAC  
CTAGAAGGGTACCGATTCGACGTAATAACGGACCATCTAGCGCTCAAGTGGCTGAATTCGATCGAGAGCC  
CGTCAGGAAGGATTGCGCGATGGGCATTGGAAGTGCAGCAATTCGAATTTGACGTTTATTATCGTCGAGG  
GAAGCTCAACGTCGTGGCCGATGCCCTGTCGAGGCATCCTCTAGAGACCTGTCAACAAGCAGTGGTGGCC  
GAGGCCCCCTGCAAATGGGTCGCGAGGATGCGTGTTAGAATCGCCGAAGAGCCAGCCAAGTTCCCGGATT

ACACCGAGGAAAACGGACAGCTATATAGGCATTTGGGTCACCGGATAGACGATGAGGACTACATCCCTTG  
GAAACTATGCGTAGGCAGTGGTCAACGCCAGAGGGTACTGCGGGAATGTCATGATGCTCCACGGCCGGA  
CATCAAGGTGTCAGAAAAACGGTGGCGAGGTTAGCCCAGCGGTACTACTGGCCGGGTATGTTCCGCGATG  
CCGCCAGATACGTGAAATGTTGCGAAGACTGCCAAAAATTCAAGAGTGAGCAACTCAAACCGGCTGGTCG  
CATGCTGACGAGGCAGGTGGCAGAGCCGATGGCGGTACTTTGCGCGGACTTCGTCCGACCCCTTCCACGG  
TCGAAACATGGAAACACGATGCTATTGGTGTTCATGACGCTTTCTCGAAATGGGTGGAGTTGGTCCCTCT  
CAGAAGAGCCACGGCAGCACACCTGCAAACCTGCGTTTCGAGAGAGGATTCTAAGTAGGTTCCGGGTACCT  
AGAAAGTTTGTGTGCGACAACGGGGTACAATTTACGAGTCGGAGCTTCAAGTCATTTTTGGGGTCCCTGG  
GTGTAGAGATCCAGTATACCGCCCCGTAAGTGTCCGCAAGAGAATCCCCTGAGAGGACTAACCAGGACTGT  
AAAGACCATGATAGCGCAATTTATTGAGGGGCCACCAGAGTTCATGGGATGAACTCTTGCCCGAGATCTCG  
CTGGCGGTCAACACGAGCGTGGCAGATTCAACGGGCTTTAGTCCCGCTTTCCTGATGCAGGGCAGGGAAC  
CTCGGTTACCCGCAGCTCTGTACGATCAGGTAACCTCCGGGGTCCGCAACTAGTGCGCTCGACCTAGGAC  
AAAGGCGGATAGGCTAAAAGAAATTTTTGATATCGTCCACAGCAACCTCCAGCGCGCATCAAAGGACCAG  
GGCAGGCATTACAACCTTGCGGAGACGAGAGTGGCGGGCCCTCGTTGGACTCGATGGTCTGTGAGGCAGC  
ACCAGTTGTCCAACGCTGCCGAAGGTTTCGCCGCAAAGTTGGCACCCAAATTTGACGGCCCTACAAAGT  
CGTCAAATTCATATCCCCCAATATTGTGCGGCTGGTGAAATCAGACGACCGCAAGAAGAGGGTGGCCAAC  
ATCTCACAATTGAAACCATTCTACAGAAAGACGACGAGCGACGAAGAAGACGAAGATCCAGGGGCACGCA  
AATGCCCACGAGTAAGCGAAGGATGAGAGCAACACCCGTCGCCAACGAACTATTATGATTAAGCTTAG  
ATAAACTAACATTAACAACATAATTCAGAATAGGCATAGTAAAGTGTGAGCCGCACTGAGAGAATAGG  
GCATTAACAAATAAGTAAAGAGTAAGTTAACCAATAAGCTGAACTTTCAGATGGAACCCGAAGTTATCCG  
ACATATCGTCAGACGAAGACAACAGCAGCGGGGACACCGAGCCTTTCCCCGGGGCCGGGAGCCGCAAGGCC  
GTCCGCGCGACCCACGCCAGGGGCGTGAGTACTATCGAAGAGAACGGCAAGAAGGACCGCCTCGCCAGT  
TCCGCCATACACTATTCTCCCGGCGGACCAGCATAATGGAGAGGCTAGACGGGATGGTCTTGCTGATGGC  
AGTCGAGGTCACGACAATGTTCTGTGGAGGCACCGTTCGCCCGGAACTCGCCACCGTACGCGGAAGAGCCT  
GCATCTCCGCCCCCTCGCATCCCACTCGGCACAATCATCAGAGCCGGCAACCCCAACCGCGGGCCGGCGAGA  
TGGACGAGGAGGAAGAGTCCGCACCGTTCGGAACGGAGGAGCACACACCACCAGCGCAGGACGTGGAGG  
CGGTAGGAGAAGAGATATCCCCGTCGGCCGGAGACGCGGAGTCGCCACCGACGGAGGTGCCGAACGGCA  
TCCGCGCAAACGACGGGGAAGCAGACCCGCTGAGCCTCGACCCAGAACCCTTAGTGAGGGGGACCCGT  
CAACGGAGGACGAGCCGGAATTCCGTGCGCGCTTTGCCACCCACCGTCTGGAGGTAGACCCGGGCAGCCA  
GTTTCCCAGGATAACGCTGCGGTACCTACCAAAAGTCCCCGCGGTAGCCAACAAACCCCGTCTGAACCCC  
GCAAAGCGCGAATGGGGGGGTGCCGAAGAAGGCCCGGCGGAAAGCGCCGACGCAGCCGCCATCGTCGA  
CGGAGAGCCGCCAGGGGCGAGCGTCGCCGGAGTGGAGGCCATCGCCGACCCAGTCCCGAGGGAGCATCC  
TCGTGCGCCACGAAGAGGCTTCGCACGGAGACCGAGAAGCCCCGAAGGATCGCAGCGGTGCGTGCCGCGT  
TCGCCCCGCGAGCGCCAGGAGGGTCTTCCCCAGCTCGGGAAGGATAACCGCCGCTGCNAGATCGCTTCTC  
GAGGAGGGCATCCCGAACCCCTGGCCGATACCGATTGCGGTCTGCCAGATGGTCGTGGAGGAGCACCGTCT  
CAGCACCAAGGACGCGGCGAACTCGGCCGTTTCCACAGCCCGCGCCGAGGCGCCAGACGAAACCTTTCT  
AAGGAATCGGAGGAGGAGTGGCTCGACGACGAGGACGAGATGCCCGCGCTCGTGCTATTGCCCGCGCC  
GAGACACCCGACACCATCGCCCGGCGGGAGTTAGAAGACGCCTGGTTCGGCCAAGAAGGCAAGGCGCCA  
TCCCGAAAAGGTTCTTTCACGGTTCGCCAGGAAGGCCGGGATGAAGTCTGGNCCGAGGAAGAGGACGCG  
GTGGTGACGGCTTCGTGCCCCAAGCTTTTCGAGTCCAACCCAGGATTCTTCCCCATGGCTCTAAAGACTCC  
CACGGAGAGCGAGTTGTGGGACGACATAGTGGACCTTTTCGACGGCATCGACGGGCGGGACACTAGCCTG  
GACTCAGTGCTGGGAGGAGGAACCCGACACCGAGGTTCGACACGGTCGCCCGCAGTGCCGACGTGAGGGT  
CACACCGGAGAGCCACCCCAAGAAACCCGACACCGAGGTTCGAGGCGATCGCCACAGTGCTGACGTTGG  
GGTAAAACCGGAGGGCCCCGTCGAGGAACCCGTGCCCGATTCCACCCCTCAGGCTGGAAGGTGTTTCCT  
CTTGGAACACCGTTGTCGTGCGGCGTGTTGGACCTAATCGCCAGAGAGGCGCGAATCCGCCGCTTCCGGT  
GCCGACGTACTCGGTTCCACGTGTCCGACGGGGAGAGCGAGTACAGCGTTACGCTGAACGCGAAAGGCG  
ACGTGACCGTCACCTGTCCGAAGTGAGGGGGGGGTGTGAGGCGGCTAATGAGACCAGCCACCCACAGTT  
TTCACGGCAAGGAGCCGTCATCCCTTTGGCCAAATTACGGCAAGGAGCCGCTGGCGGGACAACGCATTAA  
TTTTCTTTAGTTATAAGTATTAATTATATTAGGTAAAGATCTTAGTGAAATAAGAGGCAAGGAGCCATCAG  
TAATATAAGCAGTTCGATTAGTAGCAAAGAGGCAAGGAGCCGCGAATATTATAATTGATTTAAATAGTGA  
GTTTGAATTTAACCGCCGGCCGCGCTGCAACCGTGCGTTGTTCGATCGGTTGCTCAACACCGTCTTTGAGA  
GCGCAACTTCAATTCGGCGGCGAAGAGCGAAAGCTCCGAGGCGAAGTTGCGAAAGCTCGCGGCGAAGTT  
GAGCAGCCGAAGCGAGCGCATGGCTTGCCGGCGAGCGTGCCGGCACTTGTGATCGAACGTTAAGGGTGA  
GTAGAAGTGCTGCGCGAGATAAACGAAATCATAGATGGTATAGTGGAGCGCTAGGGCTCCAGAAAACAG

TGCGGCAGGGTTTAGCTTAGGATTTACGATAAGGTCGGAATGAATAATAGTGAATAAAGTGCCAACGTTG  
TAATTATCTAGAAAGTATTGGATTATTCCCTGTTTCCTGGTAACCCGGCTTACCTTAACATCGGAACTAAC  
CGGTGTTTCGACCTAACCTCGAACGAGGGGCATGCGGTACGAGATTGTGGCTCCGGGGTGGGCATTGCCGG  
TTGGTGTTTAGGTAGTGGAGTTGGTGCGAGGCCACGGCCCCGCTAGTGTAGTTGGTGCGAGGCCACGGCCC  
GCTAGCGTAGTTGGTGCGAGGCCACGGCCCCGCTAGCGTAGTGGTGCGAGGCCACGGCCCCGCTAGTGTAGT  
TGGTGCGAGGCCACGGCCCCGCTAGCGTAGTGGTACGAGGCCACGGCCCCGGCAGAGAGATAGGGTGTTTA  
GGTAGTGGAGTTGGTGCGAGGCCACGGCCCCGCTAGTGTGGTTGGAGCGAGGCCACGGCCCCGCTAGCATAG  
ATGGTACGAGGCCACGGCCCCGATGGTGTAGGTGTGTAGAGGTAGATCTGGGTTTGGTTTGGTCAGGATAC  
TCAC

>Ref\_Het-A

TTGAGTCTCTTTTTGGTGCCTGAAGTGAACGGACGTGCTCGCGGAGAAATAAAAAGTAAAAATCATATAA  
ATTCGGCAGCGCGCGCCAAAACGAACCGAACATAGTATATAGGGACACGATTGCAAAGTGCAAATTGCA  
ATACATATCCCTCGGTTTTTTTCATTTCGGTTTTTTCACTCGCTCAATACAGTGGCTTTTTTTTTCTTGTACATAT  
ATATAGTGCACGTGGCCTGCTGTGACTTTTGCACAAAGTGTCGCCACGTGGACAATCTAGAACTTTTGCTT  
TAGTTGTTCTGCTGCGCATCAGACGCTGGCGCACGGCGTGCAAAAACACAAAAGTGGGTATATGTATAACA  
AATACATAACTGCCTAGTGCCTTATATGTACTAAAATTAACCACTATAACTCATACTCTCGTCAATAAATC  
AATAATAATTGATATAACCTAAAATAAAATTACATATAAATCAATAAATTGCTATAGCTATATATATTTTC  
AATTACTTATTAAATATACATATATACCTAGCATATATATTGCTACAAACTGTCCGTCTACGGACAATCAT  
ACCCTCTTAGCTAAAAAGAGAGCAATTTAATCAAAAATTTATTACCTATAAATAAATTAATACATAACCA  
AAAATAACAATTAACCCTTCAAATCTCTAAAAACAAGGTATTACATCAACTTTTGCCATAAAACTTCAAGC  
CCAAAGGTGACCAATCAGATTAACCTAAAAATTTCTAGCAATTTCTCAGCAAAAGTTTATGCCAATATATG  
ACGTGTGTGTGTGTGGGCAATTGTTCTGATTTTTCTTTGCACACCTATAACAATCGCTAAAATAGCTGCTGTC  
GCGCAACTTGACACACACACGCATACACACACTTATTACAGTTCATAAATTACACATATATACATCTATCA  
AAACATATACATATATACTTTACATACATATCTACAACCTCCTGTCAAAACACATATATAAACAAACATAT  
ATATCTACAGCAAACACATACAAACCTCACTTATATACATTACTTCCCCTCTTTTTTGACGTCCATATAAGTG  
ACGCGCGCATAGAAACCTGACGAAGCTGAGAGCAGGCGGAACCTGTAGCTAGTCGACATTCTGGTTTGTGA  
ATTGACTAAATCGGTCAACTTGGTGCGAAACCAAAAGCACACACTCACAAACAAATCACAAACAAAGCGC  
CATTTAGTCGTTTCATCCACCCATCTCCATTTTGCACTTTTCCTATTTTCATATAAACTCAACCTTTGCAAAA  
ACCAACAAAGAGCTCAAGCTTTTACACGTCCCCTTTGTAGGCTGCTCTTAATTTTTTCGTAAAGGTTGACAC  
AAACAAAATCAAAACTGGTGCTTCATCACCAATAAACTAAATAAATTAATAAACTAAATACTTACCTTAATC  
AAACCTATTAAAAAATTGAAGCTTAATCAGGTGTTTCGCCACCAACAATATTAAGCTACTATCACACATAC  
ACTTACTTATACTCACCTTATCACACTTCTCATATACTTACCTATACTTACCTTATCACACCTTCATATTAC  
ATATATTCATACTTACCTATACTTACCTTATCATACTCATATATAATTATAATTTTCATACCGGTGTGCCATC  
ACCAATCACAACTATATATAATATATATACTTACCTCAACCATATACTCACCGTATACCAATACCTACCT  
TTCACCCATATTTACCAATTACCACTATCAATATGTCAGATCCAAACACTACGCCCACTACTCACCTGTCC  
GCCGAGCCTACAATATCGCCAGGACTCTTGTCAAACTTATCAGGCCTACTGCTCTCGCCGATACTGACAAT  
GCCGGCATCAATGAACGGTCTACTATCAATTTCAGTAGACTCATTGGCGCCAGCAACAGCCCTGTCCCCC  
AGGCTCTCATATCGACAGCCAGTGAAACACCTGCGCAAAAAGGACAAGAACAGAAACGCGCTGCGGGCA  
AAGAAACAGAAAACACTGTTTCGGAAACGACAACAACATCATCAATAACGGCAAAAACAACAGCTACAA  
ACACGAATATCGAGAGTATTCATATACCAGCTGACGCTCAGGCACAACCTAGCACATTTTAAACGCCTAAT  
TGCCAGCTTGAGTTGGATACTACTCCTCCAAACAGTCAAGCTGCCGACAACCTTACCAGCTACTACGATG  
AACACTCCTCTAGTGATTCAATCGTAAATATTATGGATAGCGATGATGCCCTTGCACACCAAAAGCCAGCT  
CAACCGCTGCCGATGAGCACCTTTTCGCCACCATACTCCCACTTCGGTTGTTGCTACAAAAACCTCCACACA  
AGTCATTTTCGCCAACATATGCAGCCATTTTGGCTGGCAATGCTGCAAAATCAAAAACCCAAAAATTCAACG  
TGATATAAGCAGCAGCAGTGACAGCAGTTCCAACAATGCACCCGGTATTGGTGGTCCCGGCGGCAAAATCA  
CCACCACAGCCACTACCGGTGCATCTCACTATAAGTTACTGCATCCCACAGGCCAAAACAGCCAATCAAAT  
TCGCAAAAATAATGCACGAAAGTCAAATCGCCAAAACCTCGGCAATTTCTCGCCTATCCCAGCAAGATGCT  
CAAAGACGCAACCAATTTGCAAATCGGTTACATTATTATCTGAATCCGACTTTGAAGCGCCAGATACAC  
ATCAGTCCCAACAGCTGCCGGCGAAAACCTAACAATTTGGCCGTGCCGCTACAAGCTGCCCTGTCACCTGT  
CAAACAGTCAACAACCTACGACAACAACCTCCAACCTAACACAAGAGCAGCATTGACAAGTATCCATTTTCGCC  
ACTGCCGCCACGGCCGTCAATGCTACTCCTTCTAACTCTCCCGACTGTCAACAACAACAGCAAGCTGGTGC  
GATCAATGTTTCTGCCCTGCGGCGAAACACTACAAACCGCCACAGATATGCATTACAGCATTACAACAG  
CCAGATCAAAACGGCATCGATTCTGTAATTGCCAAATTAAACGGACAAAACCCGCCCATATTGATTATG  
GATTAAATTGGGTGGTCTTGGCATATTAAGAATCCTGCCAAAACCTTTAGAGACTTACTCTAAAATCATA

AACGTCCTCAATACGGACAATTCAATCAATTATAACACGTACCAGAGGCGTGAGGAGCGCTCATTACAGGG  
TTGTGGTGCAGGGGCATTACAGCCTCCACAAGCACCGACGCAATCCGGAACGAGCTGACCTGCATGGGCTA  
TACGATTCGCAACGTATATTGCCCAAATATAAGAATCGCAGCGGCCCTGGTACATATCAACCGAATATA  
TTCTTTGTGGAATTGGCTCCCGATTCCACAAAGAATCGATCTATATTCGAAATCAGAAATCTTTGCAAATA  
CGTCGTCCGCTTCGAGTGGCCTAAAATAGATGGCAAGAATTTGCCACAGTGCCACCGATGCCAGCGCTTT  
AACCACACGGCCCCTTATTGCCGCCACCCTGCTCGCTGTGTGAAGTGCGGTAATGAGCACCTCACACAGA  
CTTGCGTCAAACCGGCAAATGTGCCAGCCACTTGTGCAAACCTGCGGCTCGGACCATAACAGCCAATTACAA  
GGGCTGCCCCTTGTATCTGGATCTGCTACAAGCAAACTGTTGTCCCTGCCAAACAGCAAAAATATCAGTC  
CGAATGTTTCGGCAGCCTCAGCCGAAATTACAGCGGCGGCAAAAGCAGCCTCAGCGCCAGCAATCTGCTCA  
ACTGCAACTGCAACAGCAGCAGCAACAGCAAAAACAACAACAAGTTCAGCTGCAGCGCCAGCTGCCAAA  
GCCTAAGCTAATCAACAACAAAAATAACAAGAAATCAAAACAAAATGGTGGACAGATAGGAACGCAACC  
AATACAAAATCAAAAATTACAACTAGCACTCCAGCTGGAGTTCCCCGAAAATCTACCACACCAATCACA  
AACAAATATCAATACGGCAAACAATGCCAATAACTCCAATCCCCCCCACCGTCTCCTCATCCAACCTCCTT  
GGATCCACGCTCTAGATGGGCGCGGATCCAAAGTTTACAACAACAACAACAGCAGCAACGCCAACTTGA  
GAGACCTGACTCTGTTCAAACCAGAGAACAGATCATCTCAAGGCAGCGCCAGATGCTAGAAAATTGGTCC  
ATCCGGCAACAAGCCACCTCCGCCAATCAACCCGTCACACAACAACAATCCACGCCAATGCAAGTTGACG  
TTGAGCAGCGACAGCTACTACCATCACCACAACAACAGCAACTTTACCAAACACCCTCCTCCAACGATCT  
GCGAAACGATATACTGCTTCAAATGGCCAACAAGCAGCAAGAGCAGTTAGACGGTCTGATGGGCTCGGTG  
TTGATATTGCAACAACAATTGCAAGGAGTGCTCCGCCTAGGCGCAGACTCTACACCGCTCGCTGTACCAT  
GGTCAAACCTCAAGCCAATAATTTGAATGAATTCAGAGCCCCGTTTTATTGGCTCATCTACTGCTCAATCAA  
AATTAAAATCCTGGAAAAAATAGCAACTTTTACTTACCTCCAACCTTACCTTTTATTAGTTAATTTCCCAA  
CCAAATCTTTATTTTAGTACTTACCCGTTACTTACCTCCTTATTATTTTTTACCTACCTTATTTACTTACCTTTT  
TAATTTATCCTCAAGCAGCTATTATTTTCTTAAAAATATACCAACCTCATCACAATTGCATTTCTCAATGC  
AACACAACACAATCATCAATGCAATTGTCAACAAGTTGCAAAATACAAAAATGCCACAACAATTTGCCAG  
TCATGTTCCGCTATGTGCGCCTCTGTGTCTGCTCGCTCACAACACTCCAGCTTTTCCAATGCTCGAATACAG  
TGAGCTTATGCACACACACGCGCACAATGAGCGCGCTTCCTATTCGTCAATGCGCTGGCGCACACTAAAA  
CATAAGCAGACGAAACAAGATGTCTGTTCCACACTTGCCACCCCATGACCAATGGCAACAGAAGCTGCT  
ATTTGCATCCCTAACCGGCCTACGAGGGAAGACGGGCAACTTCCTTTTCAAGAAAAGCTCCAGAAATCCA  
CATTTGGCAGCATCAAACATCATCACTCCTTTACACACACACACACACAATCACATCGAGAAAAAGCA  
ATGAACACAAACACAGCACACAATATGCTTATCATTGCCTCTTCACACCAATGAATCTGCCAATTCAAAT  
TCTACTTACTAAAACTTCTCAATCTCAACCATCTTTTTTATCCCGCATCGCAAATATTTAATCATAGCCAA  
CACGCATTTGATAACAGCCAGTGCAAATATATTTAAATTATTGAAATTTAAATGAACTGAGAGAAGGTAC  
TCGGCTAAAATAACATCAATTTTCTTATCAACTGCGGTGTTATTTATCTGCTTTTGATGTGGGAAACAGAG  
GATAGGGAGATTTTTTAAATTGGGAAAACAAAAACCAACAATCAACACAGGACGGACATGACAAATCA  
CAGTTGTGAATTGTGGAGTGGCCCTGTGTGTTCTCTGTTTCAATTTGCCAACCCCTATGTCTCGGGCAATGCAG  
ACACACACACCATACAATTGGGAACACACACACACTGTATATTCATGCGCCGAGTCCAATTCTCTATCAAT  
AAGAAACAAGAAAACATTTCTCCTTATTTTCGTACATCAAACACAGACAAATCACAACGAAAAATTATTAT  
TTTCATAAACTCCATTAAATAAATTCTCTCATCATTTTGTCTGTACTCTTATCAATAATGCTGGCTTATGGCG  
AACCAGATTTGCTGACGCCGCACACCACTCCAATTGTATACTTCTTCTATACACTTGAATTTTTTATTTACTA  
AAAATATAGAGACATATCATTTTAGCTCTTATCATAAAGTTAATTTTTTGCACAAATGGTATGAATATTAA  
GTTGGCAAATTCATATAATTTTGTAAAACATACACGACACACACAAATTCCTAAACATGTATATACACATA  
AACATATCACAAAACACAAAAATTTAAAATGTATAGAATTAAGGAAGTATATATCAATAAACTCTGGAGG  
GGGGATTGGTTCGGTGTGTGACGGTGGGAGGGGGGATACTTTGTACCGCTGCAGGATAGTGGCCTGTGTG  
TGGGTGTGCATACCCGTGATGGTTTGGAGCGGTTGACGAGCATGAGCTAGTAGGCACCTTTAATGCTGCCT  
CGCCATGTCTCGAGCCCTCCAGGCCACCACGACCATGCATACTCAAACACTCGCTCGCTCTCTGTGCGATG  
CGAATGCTCGATGCCCCGACGCTCGGTACTCGGTACTCGGTACACGATGCTCGGTGTCTCTCGATCCCGTTTC  
CCATTTCGTCTCATCCGACCCGGTCTCCTGCTCAACCTAAAACAGAAA

>9\_rnd-4\_family-2098\_\_Unknown

TTATGTCGTTTTTGAAGCGACATAGCTCCGCCGATCTAAAAATCATGGAGATATGACGTTTCAAAGCGACAT  
AATTTGCCGTCGATCATGGCGAGATTATGTCGTTTTTGAAGCGACATAGCTCCGCCAGCTCTAAAAAAATC  
TTGGAGATATGACGTTTCAAAGCGACATAACTTCGCCATTGATCAAGGCGAGATTATGTCGTTTTTGAAGC  
GACTATGGCTCCGCCGATCTAAAAACAATCATGGAGATATGACGTTTCAATACGACATAACTTCGCCGTT  
ATTCAGGGCGAGATTATGTCGTTTTTACGCGACATAGCTCCGCCGCTCTAAAAAAATCTTGGAGATATGA  
CGTTTCAAAGCGACACAACCTTCGCCGTTGATCATGGCGAGATTATGTCGTTTTTGAAGCGACATAACTCCGC

CGCTCTAAAATCTTGGAGATATGACGTTTCAAAGCGACACAACCTTCGCCGTTGATCATGGCGAGATTATGT  
CGTTTTGAAGCGACATAGCTCCGCCGCTCTAAAAAATCTTGGAGATATGACGTTTCAAAGCGACACAACCT  
TCGCCGTTGATCATGGCGAGATTATGTCGTTTTGAAGCGACATAGCTCCGCCGCTCTAAAAAATCTTGGAGA  
TATGACGTTTCAAAGCGACACAACCTTCGCCGTTGATCAAGGCGAGATTATGTCGTTTTGAAGCGACATAA  
CTCCGCCGATCTAAAAATCATGGAGATATGACGTTTCAAAGCGACATAACTTCGCCGTCGATCATGGCGA  
GATTATGTCGTTTTGAAACTGACATAACTCCGCCGCTCTAAAATCTTGGGAATGATATGACGTTTCCAAAGC  
GACATAACTTCGCCGTCGATCATGGCGAGATTATGTCGTTTTGAAGCGCGACATATCCGCCGCTCTAAAAT  
CTTGGAGATATGACGTTTCAAAGCGACACAACCTTCGCCGTTGATCAAGGCGAGATTATGTCGTTTTGAAGC  
GACATAGCTCCGCCGCTCNAAAAAATCTCGGAGATATGACGTTTCAAAGCGACANAACCTTCGCCGTCG  
ATCATGGCGAGATTATGTCGTTTTGAAGCGACATAGCTCCGCCGCTCTAACAAAAATCTCGGAGATATGA  
CGTTTCAAAGCGACATAACTTCGCCGTCGATCATGGCGAGATTATGTCGTTTTGAAGCGACATAGCTCCGC  
CGCTCAAAAAAATNTCGGAGATATGACGTTTCAAAGCGACATAACTTCGCCGTCGATCATGGCGAGATTAT  
TGTCGTTTTGAAGCGACATAACTCCGCCGCTCTAAAAAATCTTGGAGATATGACGTTTCAAAGCGACAT  
AACTTCGCCGTCGATCACGGCGAGATTATGTCGTTTTGAAGCGACATAGCTCCGCCGCTCTAAAAAATCTC  
GGAGATATGACGTTTCAAAGCGACATAACTTCGCCGTCGATCATGGCGAGATTATGTCGTTTTGAAGCGA  
CATAGCTCCGCCGCTCTAAAAAATCTCGGAGATATGACGTTTCAAAGCGACATAACTTCGCCGTCGATCNT  
GGCGAGATTATGTCGTTTTGAAGCGACATAGCTCCGCCGCCAAAAAATCTTGGAGATATGACGTTTCAA  
GCGACATAACTTCGCCGTCGATCATGGCGAGATTATGTCGTTTTGAAGCGACATAGCTCCGCCGCTAAAA  
AATCTTGGAGATATGACGTTTCAAAGCGACATAACTTCGCCGTCGATCATGGCGAGATTATGTCGTTTTGA  
AGCGACATAGCTCCGCCGCTCTAAAAAATCTTGGAGATATGACGTTTCAAAGCGACATAACTTCGCCGTC  
GATCATGGCGAGATTATGTCGTTTTGAAGCGACATAGCTCCGCCGCTCTAAAAAATCTTGGAGATATGAC  
GTTTCAAAGCGACATAACTTCGCCGTCGATCATGGCGAGATTATGTCGTTTTGAAGCGACATAGCTCCGCC  
GCTCNAAAAATCTTGGAGATATGACGTTTCAAAGCGACATAACTTCGCCGTCGATCTTGGCGGATTCTACG  
GACCTCCCCGAGTAGCCCCCTCCCTTTTTGGCCCCNATCGGGCTTTATTTGGCCGAGATATGACCATTTAAA  
GTTTTCCA AAAACGTGCGTGTGGTTGTGGACATATTAGTAAAAGAAAGCATTGCATACTTTCGAGCTGTCC  
GCATAATATGCTTGAGCCTATTAGAATAACAGTTTTACTGCATACTCTTGGGGGCGCGCATAAAATTAGCCC  
TTTACAATAAGCACCGTGGCAGCGACATNGCTCCGCCGCTAAAAATCGGAGATATGACGTTTCAAAGCGA  
CATAGCTTCGCCGTCGATCATGGCGAGATTATGTCGTTTTGAAGCGACATAGCTCCGCCGCTCTAAAAAAT  
CTTGGAGATATGACGTTTCAAAGCGACATAACTTCGCCGTCGATCATGGCGAGATTATGTCGTTTTGAAGC  
GACATAGCTCCGCCGCTCTAAAAATCTTGGAGATATGACGTTTCAAAGCGACATAACTTCGCCGTCGATC  
ATGGCGAGATTATGTCGTTTTGAAGCGACATAGCTCCGCCGCTCTAAAAAATCTTGGAGATATGACGTTT  
AAAGCGACATAACTTCGCCGTCGATCATGGCGAGATTATGTCGTTTTGAAGCGACATAGCTCCGCCGCTCT  
AAAAATCTTGGAGATATGACGTTTCAAAGCGACATAACTTCGCCGTCGATCATGGCGAGATTATGTCGTTT  
TGAAGCGACATAGCTCCGCCGCTCTAAAAAATCTCGGAGATATGACGTTTCAAAGCGACATAACTTCGCC  
GTCGATCATGGCGAGATTATGTCGTTTTGAAGCGACATAGCTCCGCCGCTCTAAAAAATCTTGGAGATATG  
ACGTTTCAAAGCGACATAACTTCGCCGTCGATCATGGCGAGATTATGTCGTTTTGAAGCGACATAGCTCCG  
CCGCTCTAAAAATCTTGGAGATATGACGTTTCAAAGCGACATAGCTTCGCCGTCGATCATGGCGAGATTAT  
GTCGTTTTGAAGCGACATAGCTCCGCCGCTCTAAAAATCTTGGAGATATGACGTTTCAAAGCGACATAACT  
TCGCCGTCGATCATGGCGAGATTATGTCGTTTTGAAGCGACATAGCTCCGCCGCTCTAAAAAATCTTGGAG  
ATATGACGTTTCAAAGCGACATAACTTCGCCGTCGATCATGGCGAGATTATGTCGTTTTGAAGCGACATAG  
CTCCGCCGCTCTAAAAATCTTGGAGATATGACGTTTCAAAGCGACATAACTTCGCCGTCGATCATGGCGA  
GATTATGTCGTTTTGAAGCGACATAGCTCCGCCGCTCTAAAAAATCTTGGAGATATGACGTTTCAAAGCGA  
CACAACCTTCGCCGTCGATCATGGCGAGATTATGCCGTTTTGAAGCGACATAACCCCGCCGCTCTCGAAAAT  
CTTGGAGATATGACGTTTCAAAGCGACACAACCTTCGCCGTCGATCATGGCGAGATTATGTCGTTTTGAAGC  
GACATANCTCCGCCGNTCTNAAAATCNTGGAGATATGACGTTTCAANGCGACACAACCTTCGCCGTCGATC  
ANGGCGAGATTATGTCGTTTTGAAGCGACATAGCTCCGCCGATCTAAAACAATCATGGAGATATGACGTT  
TCAANGCGACATAACTTCGCCGTCGNTCATGGCGAGATTATGTCGTTTTGAAGCGACATATGCTCCGCCG  
TCTAAAAATCTTGGAGATATGACGTTTCAAAGCGACATAACTTCGCCGTCGATCATGGCGAGATTATGTCG  
TTTTGAAGCGACATATAGCTCCGCCGCTCTAAAANCTTGGAGATATGACGTTTCAAGCGACATAACTTCG  
CCGTTGATCANGGCGAGATTATGTCGTTTTGAAGCGACATAGCTCCGCCGCTCTAAAAAATCNTGGAGAT  
ATGACGTTTCAAAGCGACATAACTTCGCCGTCGATCATGGCGAGATTATGTCGTTTTGAAGCGACATAGCT  
CCGCCGCTCTAAAAATCTTGGAGATATGACGTTTCAAAGCGACATAACTTCGCCGTCGATCATGGCGAGA  
TTATGTCGTTTTGAAGCGACATAGCTCCGCCGCTCTAAAAATCTTGGAGATATGACGTTTCAAAGCGACAT  
AACTTCGCCGTTGATCATGGCGAGATTATGTCGTTTTGAAGCGACATAGCTCCGCCGCTCTAAAAATCTTG

GAGATATGACGTTTCAAAGCGACATAACTTCGCCGTCGATCNTGGCGGGNTCTACGNACNTCCCCGAAGCG  
ACGTAGCCCCNCCCTCTNNGACCTATCGGGCTTTATTTGGAGATATGACNNTTCAAAGCGACATAACTTCG  
CGTGCGATTNNGGCAGATTATGTCGTTTTGAAGCGACATAGCTCCGCCGCTCTAAAAAATCATGGAGATA  
TGACGTTTCAAAGCGACATAACTTCGCCGTCGATCATGGCGAGATTATGNCGTTTTCGAAGCGACGTAGCT  
CCGCCGCTCTAAAAATCTTGGAGATATGACGTTTTAAAGCGACATAACTTCGCCGTCGATCATGGCGAGA  
TCTATGTCGTTTTCGAAGCGACATAGCTCCGCCGCTCTAAAAAATCTTGGAGATATGACGTTTCAAAGCGA  
CATAACTTCGCCGTCGATCACGGCGAGATTATGTCGTTTTGAAGCGACATAGCTCCGCCGCTCTAAAAATC  
TTGGAGATATGACGTTTCAAAGCGACATAACTTCGCCGTCGATCATGGCGAGATTATGTCGTTTTGAAGCG  
ACATAGCTCCGCCGATCTAAAAAATCNTGGAGATATGACGTTTCAAAGCGACATAACTTCGCCGTCGATC  
NTGGCGAGATTATGTCGTTTCAAAGCGACATAGCTCCGCCGATCTAAAAAACCTGGAGATATGACGTTT  
GAAGCGACATAACTTCGCCGTCGATCTTGGCGGATTCTACGGACCTCCCCGAGTAGCCCCCTCCCTTTTTGG  
CCCCTATCGGGCTTTATTTGGCCGAGATATGACCATTTAAAGTTTTCCAAAAACGTGCGTGTGGTTGTGGA  
CATATTAGTAAAAGAAAGCATTGCATACTTTCGAGCTGTCCGCATAATATGCTTGAGCCTATTAGAATAAC  
AGTTTTACTGCATACTCTTGGGGCGCGCATAAAATTAGCCCTTTACAATAAGCACGTGGCAGCAACTTTTC  
GAATCCGCCAAGATCGACGGCGAAGTTATGTCGTTTTGAAGCGACATAGCTCCGCCGATCTAAAAATCAC  
GGAGATATGACGTTTCAAAGCGACNTAACTTCGCCGTCGATCATGGCGAGATTATGTCGTTTTGAAGCGA  
CATAGCTCCGCCGCTCTAAAAATCTTGGAGATATGACGTTTCAAAGCGACNTAACTTCGCCGTCGATCATG  
GCGAGATTATGTCGTTTTGAAGCGACATAGCTCCGCCGATCTAAAAAATCNTGGAGATATGACGTTTCAA  
AGCGACATAACTTCGCCGTCGATCATGGCGAGATTATGTCGTTTTGAAGCGACATAGCTCCGCCGCTCTAA  
AAAATCNTGGAGATATGACGTTTCAAAGCGACATAACTTCGCCGTCGATCATGGCGAGATTATGTCGTTTT  
GAAGCGACATAGCTCCGCCGNTCTAAAAAATCNTGGAGATATGACGTTTCAAAGCGACATAACTTCGCCG  
TTGATCATGGCGAGATTATGTCGTTTTGAAGCGACATAGCTCCGCCGNTCTAAAAAATCNTGGAGATAT  
GACGTTTCAAAGCGACATAACTTCGCCGTCGATCTTGGCGAGATTATGTCGTTTTGAAGCGACATAGCTCC  
GCCGCTCATAAAATATCCTGGAGATATGACGTTTCAAAGCGACGCAACTTCGCCGTCGNTCTTGGCGGGA  
TTATGTCGTTTTGAAGCGACATAGCTCCGCCGCTCTAAAAAATCTTGGAGATATGACGTTTCAAAGCGACA  
CAACTTCGCCGTTGATCATGGCGAGATTATGTCGTTTTGAAGCGACATAGCTCCGCCGCTCTAAAAATCTT  
GGAGATATGACGTTTCAAAGCGACACAACCTTCGCCGTTGATCAAGGCGAGATTATGTCGTTTTGAAGCGA  
CATAACTCCGCCGATCTAAAAATCATGGAGATATGACGTTTCAAAGCGACATAACTTCGCCGTCGATCAT  
GGCGAGATTATGTCGTTTTGAAACTGACATAACTCCGCCGCTCTAAAATCTTGGAATGATATGACGTTTCC  
AAAGCGACATAACTTCGCCGTCGATCATGGCGAGATTATGTCGTTTTGAAGCGCGACATATCCGCCGCTCT  
AAAATCTTGGAGATATGACGTTTCAAAGCGACACAACCTTCGCCG

>9\_rnd-1\_family-168\_\_LINE\_\_I-Jockey

CACTTACGTTTGTGTTTCTCTGGAGATCGGACGTGAAAATTGCAGTCTCGTGTGTGTGTGCGCGTTAGTGC  
ACCGCTGGCAGCAGGCATAAACCAAGAAAGTGACATTGACACTGTATAAAGCCCGCCCCAGGGCAATCC  
ATACAAATCCCGCTTATAGTGGGTAACTATACGCAACTGCTGCCTCTGGCAGCCGGAGTGTTATACAAA  
TTAACAATATTTTAACAAAAAAATTACCGCGTGCAAGTGCGTGAGAACAAAGTTCTTGCAAAACTTAAGCTG  
CGCTCAGCTGATCGCAACTCAAGTGCGTGTGTGTGTGCGCGAGTGACAGCAAAAGCTTTCGCGAGAGAGCTT  
TCAGCTTGACAGCTGCACTGATAGTGCTGGCAAAACAGTCACTGCAGTGACAGTGCTGACACTAAAGTCAC  
AATTTGTGATCAATCACTTGTTACAAAAATACGGGTATTTTTTGTAAATTAAGTGTA AAAA ACTTGTTTTGTTT  
TTTTTTTTTTTTTTTTTTTTCTCCCTGTGGGGAAAAAAATTATAACAAAGTAAAGAACAAATGGCTACAAAAC  
AACCGACCCCAAAACAACGAAGAAATTCATTCGCCAATCTACCCGCTGCCGAACAGCTCAATAATATCCC  
CTACAAATATAGCCGCTAATGTCGATCGCCTCGACGGAAGCAGGCCACTGGAAGATTTTTACCAATATTA  
CAACAACGTGCTCGCCAGTAGTGCAAACCGGAACGGCGCCTCCACCTCGCTGTCAGCCGGTACCCAGCAA  
TGCTCGACTTGGCAACCGCAACAGCACGGCACTGTCAGCACAAACGACAGCAACAACCACCACAACCACA  
GCGTCATCCAGCAGCGGCTGCGGGACATCTGCCTCAACAGGCACAAGCCGCGCCGCTTTAGAGCCCATCG  
GGACCCGCCCCAAAGCCGCCAATCCGACCTTGCAAGTCCACCCCTTATGGCACCCAGGCAGCTGGTTCTTGT  
GTCACAAACCCCTCTGCCTCCCATAAAGAACGCAGGTGCTACGCTAGCCTTCGAAGAGCCACTGGTAGA  
TTGGCAAACGGTTTCCGCAAAAACGGCGTGGGACTACATTATTATCCGAAGGCGTAAAAAAGGGAAGCA  
ACTAAATAACCGCAACACCAGCCGCGCTGGAGCTAAGCCCGCAACTCCCAGTACCGCTTCGGCAATTAGC  
AACAGATATGCCTCCCTTGAGCCTCAGGAAGACGCCTCTGTAATCGATGACGGCGAGATGGACACTGCCG  
ACGAAGCGCCTCCAGTCACAGACCAACAACAATCAGCGAAAAGATCTCCAAACCCAGGCCGATAACAGT  
CCCTGGAGTCAGCGATATTGTCGCAATGGAGCGAACCATAGATCAGGCAGTGGGCGCAGACGCCTATGAA  
TTCAAGGTCTCTCCCTCTGGCTATCTAAGAATTTACGCCAAAGATGCCGACACCCACAGAGCAATTGTCCG  
CAAGCTCACTGAAGTGAGAGTGCAATTTACCCACTTCTGCCTAAAGGAAGACAGACCATACCGCGTTGTG

GTAAAAAATCTGGCCGCTTCCACTCCCAGAAGCCAGATTGAAGCTGCCTTTACATCGCACGGCCATATTGT  
GACGAACCTTTACAACCCGGGCGCCAGACAGCCAACAAGTGATGCAGACTCCACCAACGACTTTCCAAGT  
CGCAACTTCTGGTTTGTGATCTCAAGCAGTCTCTTAACAACAGGGAAGCGCTGCGGCTCAACAAGGTTG  
GCCGCCAACGGGTCACTATTGAGCTTCCGAGGAAGAACAAATAGTATAAAGGCAGTGTTTCCGCTGCTTCGA  
GTTTCGACCACACAAAACACTACTGTCTCAAACAGCCCAAGTGTGGTAGGTGCGGTCAAGTCCCATTGGACAA  
ACTCCGAGCAGTGCCAGGCCAAAACAGTGGCAGACCTGCGATGCTCCAAGTGGCAGGGGAAACCATGCTG  
CTTCCTATAAAGGATGCAAAAGCTATCAGGTGAGACTAAATGCCAGGCAGCCGGCCATCAATGTCTCCCC  
TCCTACACGATATAGCCATCCTCAAAATACACGAAGAACCCTCAGCAGTTCGTACCTTCCCAGATTGTGC  
AACAGGGCCTGTCGTATGCTGATGCGCTACGGCCAGGCCATCATGTACAAGTCCGCCAACCCCCAGCGCG  
CACTCTTCAGCCCACCGTCAATCCAATGCAGCTCCAACAACCACTGCAAGGACCTCAGGAGCAAGACGCT  
TCCCTTGGAGGCATCCTTCAAAACCTCCAGCAGTCCATTGCAGCACTGAATGCCGCAGTTGCAACCATTCT  
GGTTAGCATTAAAGAGCTAAAGGATGCGCAAGGTTCCCCGCAGCTTAGATTCCCAAAAGCCGCAATAAT  
GGCTACCCAGTTACGTCTCGGATCGTGGAACGCTCGTGGCATCCTCCAAAATGCTAACGAGCTCAAGCTTT  
TCTGAAAAAGCATGATGTAGACATCATGCTCATCTCAGAAACACATCTGCACACAAACTTGTACCTAACA  
ATGGAGGGGTACGTCTGCTACCGTGCGGATCACCTACAGGACGAGCCAGAGGTGGTGCTGTAGTGCTGG  
CAAAGCAGGATTTAGCACACTACCATCTACACACAGTGACCTCCAGCGACACACAGCTGGCTGCTATCAT  
GGTGGAGACTCCCTTGGGCGAAATCCTCGTTGCGGCAGCATACTACCACCAAACATCCCCTGGAACCGA  
GCGGAATTTGATTCCCTGTTTGGCCAGCTTGGCCCCAAATTCATCGTTGGAGGCGACTTCAACGCTAAGCA  
CAGACTGTGGGGAAACTACAGAGCTGACAGCAGAGGCACTGCGCTCCATGAGGCGCTCACTCCCTGCTCA  
GCCCAGGTACTGGCCACCGGTAGACCTACCCACTTTCCGTACAACCGGCAAAGTACGCCTTCTGTATCGA  
CTTTTTTATATTCAAGGGCATCCCCAACAGCGTACTATCGGTTTCGCGAAGAGTATGATCTATCTTCCGACC  
ATCTGCCACTCCTCACAACGATCAACACGGCTGCACAAAGGATCCCAAAAAGCGCAGGCTTGTCTCCTCCCT  
GGGTGCAACATCCAACGATTTAAGGCCGAATAAATAGCTTGATCAACCTAAACACGCAGATTCTGTGCTAG  
TTGAGGACGTCGACGCTGCAGTACAAACCCTGTTGGACCAAGTACATGCCGCAGCCGCCAACGCTGCGCC  
CGCACATATCTACTCAGCCCCTACAAGCCAGCGGCCAAAGGACGTTTTTCCCCATATTGGAAGGTCTTCTCGC  
CCTAAAAAGCGACTGAGGAGGGAGTATGTCCGTACCCAGGACCCACGATTGACAGGATCTATCGTCGTA  
TTGCTAACAGGGTCAGGAAGGAGCTGATTATCTCGAAAAGAAATGCCACAGACACCATGCTGGAGGAAG  
CAACGGCAGACGAGAGCTCCAAATTCGCGCTGTGGAACTTAGCAGTCGATACAAGCGGCAAGCTGCGC  
CAAAGTTCCCCGTTCGACTTCCCGATGACACCTGGGCCAGATCACCAATGGACAGAGCCGAAGCCTTTGC  
CTGCAACTTGGAGGAGCGCTTCAAGCCGTTTGAGACCGCATCGCATGGAAGGATACAGCGAGTCGCGCAA  
ATCCTGGAGGCGCCACTCCAAATGTCACTCCCTGTATCGCCAATCACCTTCCAAGAAGTAGAGCAGGAGA  
TGAAGAGATTAAAAGCAGCAAAGCCCCTGGGGAAGATCGGTTGGACAACCAGACAATCAAGCTACTGCC  
ATACAAGGCGGTGCTTTTTTCTCGTCGCCATTTTTAATGCAGCTCTTCGGCTAGGTTACTTTCCAGTGGCTTG  
GAAGAAGGCACATATAATCATGTTGCACAAGAGCGGAAAGCCCCCTAATCAACTGGGATCCTATCGCCC  
CATCAGCCTCCTGCCTGCCTTTGGTAAGATTCTGGAAAGGTGCATCCTCAGAAGGGTCCTGGATACCCCGG  
AAATAAAACGCTCGATCCCGAAGTTCCAGTTTGGGTTTCGACTCAAACACGGTACCCCTGAGCAACTACA  
TCGGGTACAAATTATATTTTGGACGGCTTTCACAGGAAAGAGTATGTGGTGGCAGCATACTCGACATC  
CAAGAAGCCTTCGACCGGGTGTGGCACGCAGGACTCCTCTCCAAGATAAAGGACAAATTGAATCCGCAGC  
TATTTAGCACCATTGCGAGCTTCTTAAGTGAAGAGAACCTTTCAAGTGGTGCAGGATGGAGTAGCCTCTCAA  
ACCAAACGCATAAAAGCGGGCGTTCCACAAGGCAGCGTCTTGGGTCCCACGCTATATAGCCTGTTTACAC  
ATGACATGCCACAGCAAATGCAAGCAGACGGAATGATCGGCAGGACCTTCTGGTGGCCACGTTTGCTGA  
CGACACGGCAATCCTTGCAAAAACAAATGTGTGTACGTGGCAACTGACCTCTTGCAAGGAATACCTCAAGC  
GATTTGAAAACCTGGGCTTGTAGATGGAACATCGCAGTGAACCCTGGAAAGTGCGCCACGGTTACCCACAC  
TCTACGCAAGGACTCATGCCCGGACTTTTTCTTCATGGTGAGCTTCTAGAGCAATATCGTCAACACAAGT  
ACCTAGGNGTCACTCTCGACAGACGACTTACATTTAGTAAGCACGTCTCTGCAGTAACGAGCAACATCAA  
ATCTAAGATAAGGCGAATGAGCTGGCTCCTCAACTCCAAAACAACTCTCGCTCCGAAACAAGGTCCTAA  
TCTACAAGGTAATCCTTGCCCCAGTGTGGCGTTACGGGCTTCAAGTTTACGGTATAGCTGCAAAACACACC  
TGAACAAAATTCGCATCATTCAGGCCAAAACCCTGCGCAAAATAACTGGAGCCGAATGGTATATTGCGAC  
ACGCGACATCGCCAAGGACCTCAAGGTTCCAATGGTGGGCGACGTAGTCAACAGGCAAGCAGCGAGCTA  
CTCAACAAAGCTCCACAACCATCCAACATCCTGGCGAGGAGCCTGCTAAGGAGGCGAAGAAGAAGGCG  
ACTGAAGAGGACCTACCCAACCGACCTAATCGATCGTTATGTATAGGTGACAAGCTTCGTTAATTACACC  
AAAATATGTTTCTGTAATCTGTTAACCTAATTGTATAACTAATTGTAAAACCACAATCATCGCTAAGCTAA  
GTTATTATGTCACTCTGATAAAAGTTGCTAACATAGAGTAACAGGATACCAGATTTCTTAATAAACAATAAT  
ATAAAAAAAAAAAAAAAAAAAAAAAAAAATGATTACATATGTCAATCAATTATTTGCTATAAAGGGCCCTATT

CAAAAATTATTGAAATGTACATAATAAAGGTTGGAATACATACTCGTCAAAATATGAAATAAAATTCAAT  
AAATTGTGACGTCATAATTTCTTATGTTAACGCGCCGTGAGCGTGACCCTTTGATTTGAATGCCATGGCCT  
GCAGGCATTAAAATTTTCTACCTACTTGCGCCGAGACTCGGCTCTGCAACAACAACATTGGTATCCAAATT  
GTGCTGTTGTTGTTTCTACGCGCTGCCTTGTAAGAACGACAGAGAAACCCGCAAAAAACACGCATTATCT  
GTCCATTTTCCTTTGCGCTGAGTTTCATAAGTCCTCATCATGGCTCACAAACCTCTTATCGATCAAAACAA  
AGGATGAAGAACAATTGAGTTTCGTGCGCACTGTTGTTGTTTTTCGCAAGTGATTTTTNTTGCCGCACCC  
GCCAATGCTGCGACATACGTAACCAGCCCCTACAAGCCAGCGCTCAAGGACATTTTTCCCTCATTTTGGAA  
GGTCTACTTGCCCTAAAAGCGATTGAGGAAGGAGTATGTCCGTACCCAGGACCCACGATTGACAGGAT  
CTATCGTCGTATTGCCAACAGGGTAGGGAAGGAGCTGATTATCCAGAAAAAATGCCACAGACACCAAG  
CTGGAGGAAGCAACAGTCGACGTGAGCTCGAATTTGCGCGCTCTGGAACCTCACAAAGGCAGTATGAACGGC  
AAGCCGCACCCAAGTTTCCCGTGCGTCATGCCAACGGCACCTGGGCCAGATCGCCAAAGGACAGAGCAG  
AAGCCTTCGTGAGCAATCTGGAGGAGCGATTACGCCGTTTCGAGACCGCATCACAAAGACAGGCTACAGAG  
TCGCGCAAACCCTGGAGCACCCCTTCCAAATGTCCCTCCCTGTGACACCAATCACAGTACACGAAGTGAA  
GCAGGAGATCAAGAGTCTTAAAAACCGCAAAGCCCCCGGCGAAGACTGCTTTTTTCATTTTGATTTTTCTTT  
TGTCTCCATTTTTCAATGCAGCTCTTCGACTAGGCCACTTCCAGCGGCCTGGAAGAAGGCGCAAATCGT  
>9\_rnd-1\_family-423\_\_LTR\_\_Pao  
TGTTCCGGTCATATACCTCATATATACATTAGTCAGGGTATCAATAGCAATGTCAAAGCAGATTATGTTAAG  
ATTATGCTAATTCTCTTCTATTTGAATGTCATAAGCACTCATACACATGTACGAAGCCTCGCTCTCTTTCGA  
ACTCTGTAATTGCTCGGTCCCTTTAATCTTAATTTATGTTAAGAAATCAGTTCTGTAAGCATCATCATAGAA  
GTCAGTCGTGTTGCTCATCAATTTGTAAAACCTTTATTAAAACTTCATACCATCCACACACGCCCACTTGA  
GATAAGATTCTTAAAAGGTCAAAAAAACGCTTTTGATCCAACATTTTGCGCGCCCAACGTTGGGGCTAGTG  
TGTGGAAATTGACGGCATATCGTTGCCGCACAACATTTGTTGAAAAAGGTTTTATCGAACTCCTCGCAA  
AATACAGCATCGACAGCAACATTTGGCCAGCTCTTCTTTCTTGTGCGGTTGCTTCGTGCTGGAAGTCTG  
CTACCTTCGCTTCGCTACTGCATTCTTGTAGCCGTTACTTCGCGCTGGATACGCTCTGAGTTTGATTGCTCA  
TTGCCTTTGCCTCACATCTCCTTTCTCGTTGCCGTTGCTTCGTGCTGGAAGTCTGCTGCTTGTTCAT  
CTGCATTCTCGTTGCCGTTGCTTCGTGCTGGAAGTCTGCTGCCTCTGCTTGTTCATCTGCATTTTGCTTCAT  
CACTGCAAGCGACCCTCACATCGGTGAGCGCAACATTTACAAGTCTTAGCTGTTCTGTTAACAGTGGGAG  
CATTTGAACTGTGCTCGCTCACATTGGTGAGAGTGACATTATCAGGTAAAGTTAGGCTGTGAAAATTTG  
GCAGTATCAAACTGTGCTCGGTTCACATCGGTGATCACAACTCTCGATACATAATGTCAACTCTTGAA  
GCAAACTTACGTAAGCGAGCGAACATAAAACGCAATATCGCACACTTAGAGGATGTTGTAAGAGTGTCTA  
CTGAGGTGATGTCAGTGAAGAAAGATTATCACACGGTGAGCTACAATTACGCTTGGACATGTTGGAGAT  
ATACATTAAGGAGGTTTTGGAAGTACAATCTGAAATTGAATTGGAAGATCCTCAGGACAATGGACGTGCA  
GAGGTGGAAGACACATATGTGAGTATCAAATTGTCCATCCAATCCCAACTGGATGATGTACTGCACAGCA  
CCTCATTTTCTAACCCTGCTCCAATTCGCTCTTCGCCGCCATCGAGTCTTCTCGATTGGCTCCGCCTGTAT  
TTGATGGGAAACGAGCAGAGTTTAAAACTTCATTACATCATTCAATCAGATTATCGGTGCTGAGTACTCT  
CTTTCGAACATTGAAAAGTTTAAATCATCTGCTGAATTGCTTGAAGGGCCCTGCCCTACAGGCAGTAAAGGC  
ATTCCAAGTGACTCAGGAAAATTATCCCAAGGCTCTTGCTCGTTTAAAGTGAACGTTATGACAATCCTACAC  
TTACATTTTTAGACACAATAGAATCACTATTCAATCTACAGCCAGTCGACAAACCGGACGGAAATCAGCT  
GCGCAGTCTGCTGGACAATGCGTCAGCCCTGTATTATCATCATTATCGTCATTGGGTACCGGATCAGATATTG  
CCCAAGCCATGTTGATATTATCGTCATCGGAAAATGTGACCAGCAAACCTCGTAACAAGTGGAATGAGTC  
TCTTGACTTACGTACATTGCCAAATTGGGCTCACTGCACAACCTATTTTGAACGTCATTGTGAGTTTCTGCA  
ATCAAGCGGCATTGCATCGTATCGAATGGCTGATTCTTCGAAACAAAAACACGTGTACAAGCCTAGCAAG  
GGATTATCATTGTGCTATTACTAATCCAACATGCATTGTTTGTTCAGCTCCGACCATAAAATTGTACAATGT  
TCTCAGTTTCAAGACATGAGTCCTAACTCAAGTACGGAGTCGTAAAAAATGCTGGACTTTGCATTAATTG  
CCTTCAATTAGGACATCGGATGGCTCAGTGTCCGTCTAACAATCGTTGTGCAAGCTGCAAGCATCGCCATC  
ACACGCTTCTGCATTTTGGCCAACCGCCTGCATCATCATCGTCTACATCGCCATCATCCATAGCGCAAATG  
TCCTCAACAACGACTCCTGCTGCAACGCACTCGCATATGAATCAATCGCCAGGCGGACAAATAATTCTTG  
CTACTGCAAAGGTACTAGTGCGAGATTATCAGGGGCGTATAAACAAGGCAGAGCATTGCTTGACTCATG  
TTCCCAAGTCAATTTACATACTGATCAATTCGCCCAACGGCTGCATCTACGCCGTGATAAGCATCATTTG  
AAATCCGCAGCATAGGGGAGACCTCGACTAAAATTAACAACGTGTAACAACCTGGAATTAAATCTCGTTT  
GTCACCATTTGAAGTAACACTACAGTTCTGCATAACGTCTCACATTGCCTACCAGCCGGATTCGGAAATCG  
ACACCTCAGATTGGAGGTTGCCCGCGAATACACCACTTGCGGACGAACTTTCCACAGGTCAGGTCGGAT  
TGATCTCCTTCTCGGTACCGAGGCATTTTTCGAATGCCTGGCTGTTGGACAGATTAAGCTCGGAGACAATT  
TGCCAGTCCTTCAGAAAACGTTGCTTGGATGGGTTGTGTCTGGCAAGTATCGTCATCAGTCAGCTAAGCAG



TCATCAACGTGCTTGCTTTCTGTGGAGGAGTCAATTGACAAAAATCTTCAATTACTGTGGAGCATTGATGC  
TCTAGAAAATTCTCCAAAGTCAATCAATCCAGAACATCGGCTCTGTGAAGATATGTATTCAAGGACAACA  
CAGATGAATAACGGCAGGATTGTTGTGCGTCTACCTTTCAAGGGAGATCCAATGTGCCTTGGCAATTCAA  
GCGATGTTGCACGTCGTCGTTTTATCGCTCGAGAGGCGCCTCAGTCAGCAGCCTACTGTTCAATCGCAAT  
ATGTAACCTTCATGAAAGAATATGAGGATCTTGGCCATATGACTTTAGTGACGAATCCGAGATTAAGTGA  
GCCACACTTTTATATACCTCACCATTGTGTTTTTAAACCCAGCAGTGCATCAACGAAGTTACGAGTCGTGT  
TTGACGCCTCGTGCACCTTCATCGTCCCAGCATTTCATTGAATGATTTGCTTCTCGTTGGCCCAACACTCCAAG  
AAGATCTGTATATACTTCTCCTTCGTTTTCGATTGGTTCGTTACGCCATCACAGCGGACATTACGAAAATG  
TATAGACAAGTTTTAGTCAGCCCAGTGGATCGGAAATTTCAATATATATTTTGGAGAGCATCCCCTGATGC  
TGATTTGCAGACCTTTGAGCTAAATACAGTGACGTATGGAACGGCCTCGGCCCCATACTTAGCAGTTCGCA  
GTTTGCAATATCTGGCAGATCTGCATGTGAACGAGTTTCCCATTGGCGCATCCATTGTAAAATCATCGTTT  
TATGTTGATGATCTGCTATGCGGAGCAAACGAGCTCATCGAGTTGCAGAACATCAAACACGAGGTCACCG  
AGATACTTCGCCGAGGACACTTCCCATTGGTTAAGTGGCACTCCAATCATCCCGCCGTCAGGAACGACGA  
ATCGGTAAAGGATTTAAACTTGGATGAAAACGCTGTCACTAGCGCACTTGGCGTAGCTTGGGATCAACGT  
CGTGATGTGCTACTATTTGAATTTAAACCCAAAAAATTGTATTCAACAGTCACAAAGAGGACTATTCTCTC  
GACTGCGTCTTCTCTGTTTCGATCCATTAGGATTGCTGGCACCAATCATTATCGTCTCGAAAATCATCATA  
AGGAGCTATGGCTGCTAAAACCTCGCCTGGGATGAATCTGTTCCGCAATCACTTCTACAAGCATGGAGAAA  
CTGCGTAACGTCTCTCAAGGAATTGTCGTCGATTTTCAGTACCCCGTTTTTGGCTTGCAAGCTGAGCTCACAG  
ACATACAACTGCACGCTTTCTGTGACGCATCAATACGTGCTTACGGCTGTTGCGTATATGTGCGTTCCACG  
GACTCGTATGGCAATGTCCAGGTTTCAGCTTCTGACTGCTAAATCTCGGGTGGCTCCTGTCAAGAAGCTGAC  
GCTTCCTCGATTAGAGTTAAGCGGAGCTCAACTTCTGAGTAAGTTATATACAACCTGTCAAAAACATATTCA  
TCGGCAAGCCGCACAGCGCGCATTCTGGTCTGATTCGCAGATTGTCTTGCCTGGCTGCAACAACACTCT  
ATCACCTTGTGCGACATTTGTTGGAATAGAGTATCCATTATACAAGATCAAACAGCAGATGGAAAGTGGA  
GACATGTACCGTCAAAAATTGAACCTGCTGACATCGTGTACAGTGGATGCCAGCTAATGAGCTCCAGCA  
ATCAATTTGGTTTACAGGACCTGCGTTTTCTGCGTGATTCCGAGACTCAATGGCCCTGCCAACAATTCGACA  
ATGATTTGGACATGGACATCATCGATGCTGAAAAACGGAAGTCTACATTTGCTGCAATTATCGAAAGTAA  
TTCTATTCTGGACTGGCTGAACGGAAGTAGTTCATACATTCGGGCGCTTCGAGTTATGGCATATATGTTCC  
GGTTTTACCATATTGCCAAAAAGGAACACCTGTGCAAGTTTCGCCGCCATGCCCAGAAGAACTTCGCCA  
CGCGTTGCACTGCATCATCAGGATCATCCAACAGCACTATTTCAAGGAAGATTTGCAATTGCTAAGGAAA  
CAAAGAGATTTGAAAAGCAATCTGAAATTTCTCAGCCCCTTCATAGATGACTCTTCTGGATACGAGCTCAT  
TAAGGTTGGCGGCAGACTCGAGCATGCTGATATCCCCTCTCGTCAAAGGCATCCTTTACTTGTTCCTCAAGG  
AATCGCAATTTGTCCACAATTATGTTTCGGCATCTTCACTTGCAGCAATTACCATGCAGGACCAAAGGCATTA  
GTTGGACTGCTGCGGCTTCAATTTCTGGGTCATAAACGCAAGAGCTTTAGCACGCAGCATTGTTCTGTTCTTG  
TGTACACTGTGTCAGATATCGTCCAGTTCTACTTCGTCAAGTCATGGGTTCCCTGCCACCTGAGCGCTTATC  
CACAGACAAGCCATTCGCCACGTTGGAGTCGACTTCTGCGGTGTCCAGTGAACACCTATCTTCGAATACG  
TGGCAAGGGTCCCACAAAATCCTATATCGCCATATATGTCTGCATGGCCGTAAAGGCCGTTTCACATTGAA  
ATCGTGTGAGATCTTTCAACGAATAAGTTTTTGGAAATCGTTGAAACGCATGGTTGCCCGTCGTGGACCAGT  
ATCGCACATCTATTGTGACAACGCCACAAATTTTGTGCGGAGCATCCAACAAGCTACTCGAGTTAAAGAAG  
TTCATGTTCAACACTAGCACTCAAGATGCTATCCTATCATATTGTTCTCTGAAGAGATAACCTTTTCATTTC  
ATTCCACCTAGGGCTCCACACTTTGGCGGTCTTTGGGAGGCGCGTGTCAAGAGCGCAAAGAGTCTGCTGG  
TGCGTACCCTCGCTAACACCCGGTTCACCTTTGAGGAAGTGAACACCGCAGTCGTTGAGATAGAAGCAGT  
ACTCAACTCTCGCCCGCTGTCACCGCTATCATCTGATCCCAACGACTTCAGCGCTCTCACTGCAGGACACT  
TTCTAAATGGAGATGCACCGCGCGCTTTGCCCGAGCGTGAGATTATCACCACAAACATCTCCAACCTGGAT  
CGTTACGAGCAGATCACAGCTGTTAAACAGCAATTCTGGCGTCGTTGGTCTGCGGAGTATGTGAACGAGC  
TTCGAGCCAGGACAAAATGGACTTCGGCTTCCCCAAATCTCACAGTTGACTCTATGGTCATCATACATGAG  
GACAACACACCGCCATTACACTGGAAATTAGGGCGTGTTGAGTCTGTTGTGAGTGGCAAAGATGACCGGG  
TTCGTGTGCGATATATTGCGACTGCCTCTGGACTCTGTTGCCGGCCAGTACATAAGCTGGCTGTTCTACCTG  
TCTCTTGAAAGATAATTCTTTCAAGGCGGCCGGGATGTTTCGGTCATATACCTCATATATACATTAGTCAGG  
GTATCAATAGCAATGTCAAAGCAGATTATGTTAAGATTATGCTAATTCTCTTCTATTGTAATGTCATAAGC  
ACTCATACACATGTACGAAGCCTCGCTCTCTTTTCGAACTCTGTAATTGCTCGGTCCCTTTAATCTTAATTTA  
TGTTAAGAAATCAGTTCTGTAAGCATCATCATAGAAGTCAGTCGTGTTGCTCATCAATTTGTAAAACCTTT  
ATTAAAACCTTCATACCATCCACACACGCCCCACTTGAGATAAGATTCTTAAAAGGTCAAAAAAACGCTTTT  
GATCCAACA

>9\_rnd-1\_family-78\_\_LTR\_\_Gypsy

CTCGTTTCTCAGGTACAGAGACCGCTTTGCGAGGGGATCTGAGTCAGACGACTCCACCACCTTAGATAGG  
GAAGCCGTCCNGCAAAAAATCGCTGACAACAGGTGTAAAATAGGAATGGAGCCTGAGCAGCTTAGGGCC  
TTGCNCGGTGGCCGCCGCTTAGAAGCACAGAGCGCAATATTGAGGCAAAGAGATGCAGAGCTGAGGGC  
TTCCTTAGACGCTCAGATACAAGAATTGGTAGGCAGAATATCTACCAGTAGTATAGAAACACCGCCGGTC  
CAGGCATTTGAGCCGGTGGAATCAGAAACGACGTCCAATGTAATGAACCATTGGACGCCGTTAAATGCT  
TACCAGAATTTACGGGGGTGCCAGAGACGTACGCCTCTTGAGACAAGCTGCGATAGCGGCATATAAAAT  
TTACAAGCCATACGACGGCAGCTCACGCCACTACCAGGCGGTTCATTATTATAAAGAGCAAAATTAGAGGG  
GCAGCTGACGGCGTTTTGGGTGAGTTTGGCACAGTAATGAATTTTGATGCCATAATAAACCGTCTCGATTT  
CACATACAGGGATAAGAGAGGCATTCACGTCATAGAGCAAGAGATGAGCACCCCTAAGACAGGGGCTCGTT  
AACAAATTTTACAATACTATGACGAGGTTGAGAAAAGCTAACTCTTCTACCAATAAAGGTCAACATGTCTTA  
TGAACCAAGCATGGCACAAGGGCTCTGTACAAAGTTTAGAGATGATGCGTTGCGTGTTTTTGTCTCAGGCC  
TAAAGCGTAGCCTGACGGATGTCTGTTCGCGGCAAAGCCTAAGGACTTACCGTCGGCCCTAGCGCTAGC  
GCAAGAGGTAGAGGCAAACCATGAGAGGTACGCCTTTGCCGCTAGCTTCGCTAAAGGACAAGAAGATAG  
GGAACGAAAAGTGACCCCGAGGCCGAGGTCCGTGAGCAAGATAGGGGTCAACAGCAGGGGATCCGCAA  
CCCAGCGGTTCCAAAAATCCTCACTTCACTAAACAACAGAAACAGCAACAAAGTCAATTTGAGCAACAGA  
GTGGCAGGTGGAACAAAGGTGGCGGGTCACAGGAACCAATGGACGTCGATCCATCTGTGTCTAAAATTCT  
ACAACCATCGCAAGCACCAGCCTACGTTAACTCTAGCGCTCCTCAAGCCTACAAAAGAACGGCCACGTCT  
GGGCGTTTAAGCGGACAGAGGAGGCAGAGAGTCAATCACACAGCTCACGAGCCGGATCAAGATTCAGGT  
TCGTATGCTAGCTCTGCAGCAGCAGCAACAGCAAATTGCCGACGACAATGGTAGCGGTTATGACTCAG  
ACACTCTCANTTTTTAGGGGAAGCTCCCTGCTGCCCTACATCAGTAGAAGAGTAGCAGGGATCCAGATGA  
GGTTTCTCATCGACACGGGCGCTTCCAAGAATTATATCAGACCACATAAAAAATCTAAAAGGTGTGTGCC  
AGTAAATTCTCCCTTCTCTACCCATTCTATACACGGCACCACGAAGATCACTCATAAGTGCCTTATATCTCT  
GTTTCGGCAAAACTGCCACATTTTTCTTACTCCCAAACCTGTCCACATTTGATGGAATTGTGGGCCTCGACT  
TGCTCACACAAGCAGGAGTTTCGCTTTGTCTTTCTTCTGGCCAACTCAAATGTGGCGCAGAAACTGAACAA  
ATCGAATTCCACAGGTGCGCGGATGTTAACTTTACCAATGTTGACTGCGCCGACGCGCCCGATGCTGTAA  
AAGATGCATTCCTAAAGATGCAGAAAGCAAACATAAGGCCTTCGCAGATCCGGAAGAAGCACTTCCCTAT  
AACACATCAGTGGTGGCAACCATCAGGACCACTGATGAACAACCAAGTTTATGTCCGACTGTACCCCTACC  
CCATGGGAGCAGCGGAATTCGTTAATAAAGAGATTCAAAGCCTTCTGAAGAACGGTATCATCAAAAAATC  
TGTCTCCCCCTACAACAACCCCATTTGGGTGGTGGACAAGAAGGGGACGGACGAGTTTGGTAACAAGAAT  
ATGCGCCTAGTAATGGATTTTCGCAAACTTAACGAGAAAACCATCGCAGACAGATACCCTATGCCTAACA  
TTCCAATGATTTTGGGGAATCTTGGCAAAGCTAAATACACTTTTCGACATTGGACCTAAAGTCGGGGTACC  
ATCAAATTTACGCTTGCGGAGCGTGACCGCGAAAAGAGCTTCATTTTCAGTAAGCGGCGGCAAGTACGAG  
TTCTGTCGCCTACCATTTCGGCCTGCGCAATGCGAGCAGCATATTCCAAAGGGCAATAGACGATATCCTGA  
GGGAACATATAGGAAAGATTTGCTTTGTCTATGTAGACGACGTCATAATTTTTCTAAAGACGAAACGGAG  
CACCTTCAACACGTTAACATTGTGTTAAAATGTCTAATCGACGCAAACATGCGTGTAGGCCCCGGAAAAG  
ACTCGTTTCTTCAAGGAAAGTATCGAATTCCTGGGTTTCGTTGTAACCAAAGACGGAGCAACATCCGACCC  
CGAAAAGTTAAAGCCATTTCAGGAATTCCTGAACCAAAGAATGTCTACGGCGTTAGGTCCTTCTTGGGG  
TTAGCCAACTACTATAGGGTCTTTATTAAGGACTTTGCCGCTATAGCGCGTCCGATATCGGACATACTTAA  
AGGGGAAAATGGTTCAGTTAGTAGGCACGTATCAAAGAAAATCCCTGTTGAATTTAATGAAGTTCAACGC  
GATGCATTTACCGTCTGCGGAGTATTTTGGCATCAGAAGACGTCATGTTAATGTATCCAGACTTCCAGAA  
ACCGTTCGATTTAACCCTGACGCTTCGGCCAGCGGAATTGGCGCGGTTCTTTCCCAAGGCAATAGGCCA  
ATAACAATGATTTCTCGCGCCTTAAACAGGCCGAACGAACTATGCCACTAACGAAAGAGAATTGCTGG  
CCATTGTGTGGGCTTTAGGCAGATTGCAGAACTTTCTGTACGGTTCTAGGGAAATTAACATTTTACGGAC  
CACCAGCCGCTCACGTTTCGCCGTGTCGGACAAGAACACGAATTCCAAGATTAAAAGATGGAAATCTTACA  
TTGACCAGCACAAATGCCAAAATGTTTTATAAACCGGGCAAAGAGAATCTGGTGGCGGATGCCCTTTCAAG  
GCAAAACATTAATGCTCTGCAAGATGGGCCCGTTTCGGACGCTGCAACCGTTCACAGCGAACTTTCCCTG  
ACCTACACGGTCGAGACAACAGACAAACCTTTGAATTGCTTTAGGAACCAGATTGTCCTAGAGGAATCGC  
GTTTTCCGCTAAAGCGAAACTTGTGTGCTGTTTCGCAGCAAAACACGCCACTTGATCAGTTACACTGATCGC  
ACAGCCCTTCTAGATGAACTCCTTGACTTGATTAATCCAAATGCGGTCAATGCCCTCTATTGCAACCTGCA  
CACACTAGCACAGGTGCAGGATGGCTTAGTTTCGCATGTTTCCAGGCACAAAGTTCTGGCACTGCAAAAAC  
CGAGTTGCAGATGTCTTCAACGTTGACGAGAGGAGAGAAATTCTCGTTGCCGAACATAATAGAGCGCACA  
AGAGCAGCTCAAGAAAATGTTAAGCAAGTGTTATCAGAATACTATTTCCCTAAAATGGCGAAGTTGGCTA  
AAGAAATTGCGGAAAGTTGTAGAATCTGCTCAGCAGCCAAATACGATAGGCACCCGAAAAGACAGGAGC  
TGGGAGAAACTCCGATCCCTGAGACTCCTGGGGAATTTCTACACATTGATATTTTTTCCACGGACAAACAA

TTTTTTTTTGACCTGTGTTGATAAGTTCTCTAAATTTGCAGTCGTACAACCAATTCAGTCGCGCACTATCGG  
GGACTTAAAAGCTCCACTACTGCAGCTCACGAATTTCTTTCCACGAGCCAGAACAATTTATTGCGACAACG  
AGNCTTCGATGAATTCTCAAACGATAAAGACCCTGTTGTTAAACAACCTACGGAGTCCATATTGTTAATGCG  
CCGCCGCTGCATAGCACCTCCAATGGCCAAGTCGAGCGCTTCCATAGCACTCTAGCCGAGCTGGCACGTT  
GCCTCAAGCTGGAGAGAAACATCAGTGA CTGACTCAGTCGAAGTCATAATGCTAGCCACGATTGAGTATAACAA  
GACAATACATTCGGTTCATCAACAAGAGACCTGTTGATGCCCTCCATGTGCCCTCAGGCGAACCCGAAGGG  
GAAATATCAGCAAAGTTAAGGAGTGCACAAGATGCGCTCCGGGCTAGGCTGAACGACCAGCGACAGAAT  
AGAGTCTTTGAAGTAGGCGAAAAAGTCCTAGTAAAAAGAAACCGCAGGCTTGGCAATAAACTCACGCCCT  
TATGTGAAGAACGGATCGTAGAGGCAGACCTTGGCACGACCGTTCTCATTGGAGGGAGGGTGGTCCACAA  
GGACAACCTTAAGTAGGGCGAGAGCTGAAATAAAACATCGATTNTATGCATCTTGAATTTAACTATAAGT  
TTCAACATTTGNGCCACTAGGCTTCACCTTCAAGTTTTAATATTTACGCCACTTGGCATTNCCTTTAGGAAG  
ACACGTAGTAATAGTTTGGTCCGTTTTGTCTGTCTTCCGCAGGTTCCGGGTTTCTGCTATTTCTATTTTTTGCA  
AGTGCGGCAGCGCGTGTGACTAATTACTCACACGCCAAGTATATTTCCCATTTGTTGAGGGCCAAGTTCTGGT  
CTGGGAGGAATTCAATTTTCGTCAGGCACACAGCAAACATCTCTGAGTACGAGAAAAATGGTAAACGAAAC  
AATTGAGCTATGTGAAATGTTTCCGCAGTCACACATGAGAAAGCTTCTAAGCGTAGATGCGTCCCACCTC  
AGAGATCTGTTAGAAGCTCTTGGCGTGCACCACAGGGTGGCAAGAAGTTTAGATTTCTTGGGCACAGCCC  
TCAAAGTAGTTGCGGGAACACCTGACGCCAGTGA CTTCGAGAAGATCAAATTCACCGAGTTACAGTTGGT  
GAACTCTAACAACAGACAGGTAGCTATCAACACAAAAGTTCAGGAACAAATCAATCAACTCACTACAAGT  
GTCAACACATTACTAAAAGCTGCAAAAAAGAATCAGATAGATTCCGGGCATTTATACGAAACTCTTTTAG  
CTCGGAATAGAATGTTGCTGATGGAAATGCAGAAATTTGATGCTCGCTGTTACCCTTGCAAAAATTAATATC  
ATAAGCCCAAATATATTAGATCACGCAGATTTGAAATCTGTTTGGGTCGATGAACCCACAGGTACTTCAAT  
AGCTGACCTTATGTCCGTTGCGTCCGTGAAAGTATTACAATCTGTTAATGCCCTTCACTTTATCATTAAAGT  
CCCGAAAATCAAAATGGCTTGCGAGAAAGGTGATGCTGTATCCAGTTGCACATGAGAATGCTGTGCTACAA  
ATTGACGACAACATTATAGCTGAGTGC GGAGATCAAGTGCTTGCCCTTAAGAATTGCACTTCCACGCCGG  
GAGGAACCTTTTGTCAACTTTCACCGACCAGCTCTTGTGCCAGAGAGCTGCATGCTGGTGGCTTGGCAAAC  
TGCCAAATGCAGCCGAGTCACTTAGACCCGATCACATGGGTTCGATGACGGAATTCTGATCATCAATAACC  
GGCCTGCTAAAGTTTGC GTTGACAACGGTACTGAGACTTGGGTTCACGGAACGAATCTAATCACGTTCAA  
TAATTGGGCTCTGATCAACGAAACTAAGTACTTGAATCGCAACAACGTCCAGAGTAAGTTCCCCGGCATC  
GCGGCATCTCCCCTTCTGAACGTCACCGGCCACCAAGACGTGCTGAGTCTCCCCTACCTTCATCGCCTGAA  
TGAACGTAACCTGGAGATCATCAAGGAAGTCAAGGACGAAATTGGAAGCGTCGACAGCGTGGTAATAGC  
CTTCTTGTTGGGTGCTGTGTGTCGCACCATAATTTGCGTCCGAGTCACCTACCGTCGGTTCACCAAAAACA  
TGGCATCGGCCAAGGAGATTAAGAAGGTGATCGCCGAGATAGGAGCGGCCGAGGGCGGCCTTA ACTTAA  
AAGGGGAGCAGTTAACAGAGGCCAACGACACCAGCTCCAGATGCTGATATAGCACTGGGCCGGATGTTCT  
TACGAGTTAACAGGGGTGAGCAAAATGCAACATAACACCAGCCGCAGATGCTGACATAGCTCTGGGCCG  
GATGTTCTTGACGACGGCAGCGCACGAGGCGCAAGCTAAGCATTCTAGCGGCCGTTGTGAAAGCACACA  
ATAGCTTAGGTATTTTTGATCAATCTTTTGTAATTTAGTTTTTAATTCGACTTTC ACTGCGGCACATCGGC  
CCAGCGACTTCGCGTATAATTTAACTCACTCGCTACGGCGTGTGCGCCTAGTGTT

>160\_rnd-1\_family-233\_\_LTR\_\_Gypsy

ATTGCGCAGTTGCATATAACTTTGGTTTTTTTTTTTACCGATCTCTATGAAATCTACAGTATATCTTATTGT  
ATCATAGAATATTTGTGTATACTGAAAAAGTCATTTGCAAATTAATTTTGGCTTAAATTGGTTGGCAATAA  
AAGTTGGGTATTAACTTGATTTATAGCTCTAGGGTGGTAGCGGAGAGGTGGCGATAGGTATAAAATGAA  
AGATACTATATNNTATTTTAGAAGCNACATGTCANGTTTNGTGACTCTAGCTCTTATTATTTACCAAAATT  
GCCCAAAAAACAGGATGTGATATCGAGGTTTCATCGATTGCTTGGAACGGAGTAAGCTATCGATTATC  
GGAAACAACTCGATCTGCGCGGGCACTAGGAGCACCTNCATCTAATTTCAAGTCTATAGCACTTATATG  
TTCTGAGATCCTTGCGTTCATACATGCGGATGGACGGACGGACAGACAGACGGACATGGCTAGATCGACT  
CGGCTATTGATGCTGATCAAGAATATATATACTTTATGGAGTCGGAGATGCTTCCTTCTGCCTGTTACATA  
CATTTGGATTTTGCACAAATACAATATACCCTTATACCCATTTTTAATGGGTTCAGGGTATAAAAATACAT  
ATACATTGGCCTGATCAACCAACTGAAAAAAAATCAATCCTTGAAAAAAACAAATTACTATAATGAAT  
TTTACATTTTTATATTTTATATCTTTATATTTTGAAATGTTTACATTAGTATATTCTCATAAATCTTAAATAA  
TTTTTTTAAATTCATATTATTTTTATCATTTTTTTTACATTTTATTATTTTATAANAAAAAAAATTATATACAA  
AAAATTTTTGTTCAAAATAATTAAGTTCATTAATAAATTA ACTACACATCCATAATGTTACGTTATTTCTTT  
GAAAAGGGAGGTGTAGTGTGTATATGCCTTAAAAGAACCCCTATATACAAATATAAAGTATGCGGCACT  
TTGTCGCATACAATAACAATTATACATTAAACAAGCCCAGAGCCACTTTGTATATTGGCTCTGGCTCATAT  
TACGCAGCGCAGTTC ACTAGCCTCTCTAGCTGATGCAACGATGAACAACAGTAGCAGTTATATCCTTAATT

ACTTTTAATTATAAAAAAAAAAATTTTGTAAAATTGAGCAGCATAGCCCGTAAANCTATGCGAAATGCTAG  
GTAGTATTTTGTGTTATTAGCAATATTGAAACCTTGAAACTAAAAACATTGGCATTTAAGCTAAAAACAC  
TATATGTTACATAAAAAACATTATATGAATTTAAAAACATTACATCAACTTNTGTAAGAAATTTTAATTAAA  
ATGGGTTCGAACGAATCCAAGGTTGAAAAATCAGCCGCAAATGTTATAAATAACGTAAAAGTAATTGACC  
ATAAAGAATAATTACTACAATATCTCTTGTATCACTAGCATTGAAAGTGTATGCAATGCATACAAAGAAA  
ATTAAGAAACGCTATAGCAGTAGAGCAGACGGACTAGATAAGGTATGAATATATTTGAATATGTCAGACA  
TAGAGGCAATCATTAGGTTTACGTATAGAGATGAGCCAGACTTTCGTACTCGCGTATTAAACGTACTGCG  
ATTACATAGAGATTTTATAAAAGTGTGTGATTTTGAATACGAATACACGGACATGTTCAATACTCATATTA  
ATGGTGCGACTGCATCGATAGATATCTATTATAAATAATATGGAATGGAGTATATTAGTGAAAAATATCAA  
TGACTTTAAACACCAATTTGACAAGTCATATAAATGCATCAATAAAGGCATACCTATAAAGGTAGAAACA  
CTAATATACCATGTACAAATATTGATAAAACAATATAACAATATAGTACATGCAGTAGATTCCATTAAAG  
AAAAACTAACACAAGAACATGCCAAACAATGCCTTAAAGTCATACAATCTTTAAATACAAGATTGAAAAA  
CATTGGCATTAGACAGAATATCATAATAAATGTTCCAGAAGATCTATTTTTACCAGCAAAGTTTGAACCAA  
ACCAGCTGCAAGATCTGAATGAGTCGAAGCACTAGCCAAAGAACATATAGACTGGACATGAGTACAGGA  
AAGTAGGCACGAAAAGTATCGGTGGCATCTGGTCCAAAATCGCGAGTAAGGGAGTAAGATATACAAATG  
ATGTATTTTTGAACCGCTTACTCTACAGGAAAGTGCTTGGCGCACTCTCTTCCATATGATTTGTGCGATAG  
AACGACAACGCTGTTAACCTTTTATCTCGCTCGCACTTACTCTCAGCTCTCAATGCTCTCTCTTTATGTTTAG  
GGATCGTTTAAATGTGTGTGTGTATGTGTCCGACAAGCAAACTGGGCAAAAATTCAATTTTTCCCAAATG  
CTGAGGCATTTCTACCTTTTGAAGGCACGAGTAATATGGAATAGAGAAAGGGTTTGCCACGTGATGCG  
AAATTCCTGCATTTTAGCTCGCTATCGTTGGTAAGGGTACCCAAGTGATGCCATGTGTGCATTTAAAATAT  
TTTGGACTCGTTATTCACGCATACTTGCATATTTTGTATATGAATAGAAGCATTATGCGCTTGTGTGCCTG  
TTGCTTGCCTGTCCCCGATGCAAATTTAACAATATTTTGGGATTTCTTATTTTTCGACCTCTACACATAGGCA  
TAGACATACAAGTGTCTGTGAATGGGCAGATCATGGGCGCAAAAGAAAATATCATTATTGGCACGCGTCT  
GACGCGCGCCCTTGAAATGAACAACAATAGCAATGGCAGAGGACATTATAGACGTAATGCCCGTGGTAAT  
AACCGAGGAAGGAATAATTCCAACCGAGGTAACAACCAAAAATAATAACAATAGAGGTAATGTCCGAGTA  
ACTGAAGGTAATTCGGAACCAATTGAGACCCCTCAGATGTTTAGAGCCAATAAATGGCACAATAAAAAAC  
CATCAATGATCCTCAACATCAGCATATTTGTAAAAATTAACAATGAAAGAACAGGTAAATCCTTTGCACT  
GTTGCCTGATACTGGTGCAGATATATCTATATTAAGAAAATGTAGATATATTTGAAAACGTAAACGAA  
AGAGTTACTACCCAAAAATCGGGAATTGGCGAAGGAACAATTTTTTCAAAATGCTTAGCCTTTATAGAAC  
TCACTACAGGTAAATACATAATTCGCGATAACTTTCATTTAGTCGATCAAAAATTCCCAATACCTAGTGAT  
GGCATACTAGGCATAGATTTTATAAAACAATATAAATTGCCAATTAGATTTTACAAAGAGAGGCGACTCAC  
TAATTCATCGCCCAAACAACCTTAAATTGTCCGATTAAATTACAAATACTTCATACTTGTGACAATAATGCC  
ACAGTACTCCCAGCTCGAAGCTGAAGTTCCGAAGTTGTCCGTGAAATACAAATACCTCAATAAAAAATC  
AAATTTTCGTATTAAATCAAGAAATCGATGAAGGAATTTATATCGCAAATACAAANATATCCAACCACAA  
AAATACTTGTGTCCGAATTTTATACAACAAATACCAATAAAATCGTCAATTTAAATAAAATAAAATATGA  
TAAAAGAACTAACGAAGAAAGCGACAACCTCATTATGAATAAATTAATTAGAACTTTCCGCCTTTATT  
CAAAAGTCAATTAAGATTTATGTACCAGTACCAATTAAGAGATTATGTACGAAGAAGTCTCTTCCGGA  
CTCTGAAAAGAAAAAATGGCGATTAGAAATTGACTATCGTCAAATTAATAAAACGCTATTGTCCGACAAA  
TTTCCACTACCTAGAATTGATGATATTCTAGATCAACTAGGTAGAGCAAAATATTTTTCATGCCTAGACTT  
AATGTGTGGCTTCCACCAAATTGAACTTGAAAAAAGTTCTAGAAATANAACGTAATTGTCAACAAGCAAT  
GGCTCATATCGCTTCACGCGATTACCATTTGAATTAAAAAATAGCATTTTCTGGTCTACAACCATCACAAGC  
ATTTCTTAANATGGATGATCTAATAGTAATCGCTTNTTCCAAGAACATATGGTCAAAAACCTTAACTGATG  
TTTTCGACCAATGTAAGAACTCAACCTGAACTACATCCGGAAAAATGTTTCAATTTTTTATGCATGAAGTC  
ACATTTTTGGGACACAAATGCACTGATAAGGGAATCTTGCCAGACGACAAAAAATACGACGTGATTAATA  
ATTACCCACTCCCACACGATGTGGACAGCGCAAGACGATTCGTTGCATTTTGTAAATTACTATACGCGCTTN  
ATAAAGAACTACTCGCTAACTATTCACGTCACATAACAAGATTATGTAAAAAAGACGTAAGATTCGAATG  
GACGCCTGAATGCCAGAACATCTCAAAACAGCACTAATAAACCTTAACTTGCTACAATATCCAGACTTCA  
CCAAAGAATTCTGCATAATAACAGATGCAAGTGAGCAAGCGTGTGGAGCAGTTTTAACTTAAAACTTGAC  
TGGACTCCAACNTCCAATTGCATACGCATCAAGATCCTTTACTGAAGGAGAAAGTAACAAGAGTACNACT  
GAACAAGAATTAACAGCTNTTCNCTGGGTAATAACACACTTTCGACCATATATTTATGGTAACCATTTCAC  
GGTAAAAACGGATCACAGACCACTAACATCTATTTTCAATGGTCAATCCAAGTTCACAATTAACACGTAT  
GAGGCTTGATTTGCAGTAATATACCTTTACGGTAGAATATCCGAAGTGTAAGACAGTTACGTAGCAGAT  
GCGTTATCGAGAATAACCATCAAGGAGCTACAAAATATAACAGGAAACATAATGAAAGTCACTACAAGA  
CAAGCACGTAGACAAGAATCCTGCGCAGGAGAAAAAGAAATAGAATTGCCTAGGCAATCTATAGAAAAA

GCTTCAAAGGCCAAAGTGTACCAAGTCATTAACAATGACGAGGTACGAAAAGTAGTGACCTTGCATGTAA  
ACAATATGACATGTTTTTTTAAACATGGAAGACAAATTACAGCAAGATACGATGTTACCGATTTATATACTA  
ATTAAACCATTGATTTGGATCAAATCTTTCAAAGGCTTGAAACGCAAGCCGGTATATATAAAATCAGTCA  
ACTCAATGTGGCTTCGTGGGAAAATATCTCTGAACACGTTTCAATGGATAATTTATAGAAAATGGGCATTC  
AAATATTA AAAATCTTTAAGAGTTGCGCTACTCCACCCGGTGACCCAAATAAATTCTGAAAAATAAAAAATA  
AGCTATCTTGTCTAAACTACTTGATGATCCCATACTAGGAGGACAGGCATTATAAAAACCTTGGCCAAAG  
TCAAACGACATTATTTTTTGGAAAGGTATGTCTAAACAAATAAAAGAATACATCCGCAAATTTCCAAAATG  
CCAGAAAGCAAAAACACTACAAAGAACACAAAAACTCCTCTAACAATAACAGAAACACCAATATCCGCTTT  
CGACAGAGTAATCGTTGACACAATTATTACCATTACCTAGAACAGAGAATGGGAACGAGTATGCAGTTAC  
ACTCATTTGTTATTTTACGAAATACCTCGTCGCAATTCCGATCCCAAATACAAGTGCAAACACTGTCGCTA  
AATCTATATTCGAATCTTTTATTCTGAAGTACGGTCCAATGAAGACGTTTATTACGGACATGGGTACGGAA  
TATAAGAATTCAATTATAAACAATTTGTGCAAGTATATGAAAATAAACAACCTTAACATCAACTGCACATC  
ATCACCAGACAGTTGGAACAGTAGAAAGAAGTCACAGGACTTTTAACGAATACATACGATCATATATATC  
AGTTGATTGGGGCGTATGGATCAAATACATCGTATACTGTTTTAACACGACCCCCCTCCATCGCACACAATT  
ATTATGAGCAAATTTTTTGGTAAACACCCAATTTACCAATATAAATAGAATCGACCCACCATATAATGTAG  
AAGATTATGCTAAAGAAGTTAAGTTTAGATTAGAAATAGCATATAAAAGGTCTAGGATAATACTTGGAAA  
ACATAAGCAAAAAGTAAGGAACCTTTTTGATAGAAAAGTTATAGATTTTCTAGTAGAAATAGAAGTCAAAG  
TCTTATTAAGAAACGAAACTGGCCATAAATTGGATCCAGAATATATAGGCCCATATACAATAGTTAACAT  
AGAAAATAGGGATAACATTCTAATTTAAGATAACAAAAATAGGACCCAAAAAGTTTATAAGAATAGACT  
AAAAACTTTTAACGAATAAAACATATAAATGTTCTATATGAA

>160\_rnd-5\_family-5029\_\_LINE\_\_R1

AAAACAAAAGATAAGGTGCAGGTGTTTCGCTTTGGCGTAAACAAAGCCATAAAACTTAACGGGACAACCTT  
GCGGTAAATAGCAATAAAACTGCTTGTGCCCCAAGACAGCGCGAAAGCAGTGCAAAGCAGTGCAAACGCG  
TTCCTGCTTTATAAGCAGTGACATAGTGCGAAGCAGTGCGAAATTTTAAAAAGCAGTGCAAGCAGCGC  
AAAAAGAGCAGTGCGGTTCGTCAACCAGNTAAGCGGTTTGTGTCCGGGTTATCGCGTGGTGTGCGGACG  
GAGGGCGCCACGACAATGGACGCCAGAAGCGTGCGCCGGCACGGCGTCTAGTGCCGAGTCCGGTTGCCAGC  
GTCGCCGCCGATGGAAGGAGGAGGGTGTGGAGAGGGAGGGGCGGTAGCACGNCGTCCCCCCCCCTGCGNA  
CCCGTTGAGCCGAAGAGGCAGGCGTTGGAAGCGCGGATGAGTTTGCCAAGCCCGCCGCTAGGGCTGCTG  
CAAAAAGAGCCGCTGATGCTGCCGCTGCAGAAGAAGACGTCAGAGCCGCTGCCGCTGCCGCCCCCATCAT  
CGCGCTTGCCCCAGCATGGAGGATAATGGCCGAGGGGACAGGGGCGATTATAGCGGAGCTTTCGGCAGCT  
GCCGAAATGACCCGCCCTTGCCCTGGTGGGTGTGCCCCCGAAGCCGCGCGCGAAGTGTCGGCAGCCGTTA  
AGCGATTGGAGGAGCTGTCCACGTCGCTGGCAGTGCGGAACGCTCTGCTCGAGAGCCTGGCAGGCAGATC  
GTCTGCAGCACAGCTCGCCGCCCCCACCCCAACTGCTGCTCACCAAGTCGTCCACCAAGTTGCCACCATG  
CTGCCCCGACCGCTGTCCCCGTCCCAGGAGTGCCGATCGCTGCCCCACGGATCAACAAGCCAGTTGAGAC  
GTGGTCCGCGGTGGTCACGAGTCGGGACCCGAGCGAGTCGGGCGAAGTGGTGGCCAAACGGATCATGGA  
GGAGGTTCGACCCACCCTTGAGGTGCGGGTGCACGAGGTGCGAGAGCTCAAGCGAGGCGGCGCGGTCTAT  
CCGCACACCATCGAAGGGCGAGCTCAACAGAGTGGTGGCAAACACCAAGTTCGCGGAGGTTGGACTCAA  
CATCCAGCCGAACAAAGGATTGAGGCCGAGGATAACGGTGTTCGATGTGGACACATCGATCCTGCCCCGAG  
GTGTTTCATGGAGGAGTTGTATACGAACAACCTTCAAGGAGGAGATGACAGCAGCGGTGTTCAACAAGGCA  
GTACACCTTGAGTCGAAGCCGTGGTCCGTCCTGATGGCGCCAGCGTTAATCTGACGCTAGAAGTTGACG  
AGAGGGCCCTGGCGACTTTTGAAAAGACCGGACGGGTCTATATAAAGTGGTTTTTCATACCGATGCCGGTC  
CCTCGTCCGCACCTATGCTTGCCATAGGTGTGTGCGCTTCGACCACAAGGTGTCCGAGTGCCGCCCTTAAGC  
AGGACGTATGCCGACAGTGTGGACAGATGGGGCATATCGCAGCCAAGTGCGCAAATCCGGTGGACTGCC  
GGAATTGCCGCTTCAAGGGGCTACCCTCGGGGCATTATATGCTTTCGGGGTCTTGCCCGATTTATGGCGCA  
GTGTTGGCGAGGGTGCAAGCTAAACATTAATGTTTAGTTTCATCCAAGCCAACTGTGGCCGGGGCGCGC  
TGCGTGCATCGATATCGGTGTACGTATGCGTGACCACGGCCACTCCTTTGCGCTGCTGCAGGAGCCATACT  
CGGACGTCGTTGGAAGGATTACGGGCTTCCCAGCCGGGATGCGCGTTTTTCGGAAGCCACGCTGTGAGGA  
CCGGAAAAGGAGCGCTGCTGTCATCATCGACGACCCAGATGCCATCTGCCTACCAGTGGAGTCGCTGACC  
ACCGAGGCTGGAGTATGTGTGAGGGTCACAGGTAAACATGGCACTGTTTACCTGACCTCCATATACTGCC  
ATGCTCATGCTGACTTGACAAGGATATTGAGCTATATGGATACCATACTGCTACTGGCGAGCAGTACACC  
GGTAATTCTCAGCCTGGACGCAAACGCTGTGTCTCCCTTGTGGTTCAGCAAACGGCACGAATTCTTTCGTG  
GCCAGCTGAACTACAGAAGAGGCGAACAGCTAGATGAGTGGATACTCGGAAGTCGTGCCAACGTGCTAA  
ATCAAGTCAGCGAGGTGTACACGTTTCGATAATGGAAGAGGACAGAGCGATATCGACGTAACAATCGTGA  
ACGAAGCAGCGTCTACGTGGGCCGCGTATGACTGGAGTGTGGACGAGTGGGATTTGAGCGACCACAACAT

GATTACTGTTGTGACTTCGCCATCCCCAGCAAATGCAGTTGAGAGCTATGCTCCTGTGCCGTCCTGGAAGC  
TCGCGAATGCTAATTGGCGATTGTTCTGACTCGGAGCTGGTAGAGGAAATCGAGGAGCACCTTTCCCAGGA  
GGATATTAGGATGTTGCCGTTGGATACCGCGGTGTCTGCCCTACGCCTTGCCGTACAGTCTGTGTGCGACA  
GAGTGTTAGGCCGCGAGACCGTCGAGAGCCCAGGGAAAAGTTAAATGGTGGACTGCCGAACTGAGTACCA  
AACGCCGGGAGGTCAGGAGACTGAGGCGGAGGCTCCAGGATGCACGGCGCAGAGGTCATGAATCTGCAC  
CGTATCTTGCAGCTCATCTGCGGACAGCTGTCCGCGAGTTCAAGACGCTCATCCTGAAGACGAAGGAGGA  
AAACTGGCGACGCTTCGTTGGAGACCACAGAGACGATCCGTGGGGGACAGTCTACCGGATATGCCGGGG  
ACGAAAGCGGTCTACCGATTTGAGGTGCCTTCGTTCCGATGACGGGCTGGTCGTAACATGGCACGACTGC  
GCGAGTCTCCTCCTCCACAGCTTTTTTCCAGTTGCGGAGTCGAGTGAAGACATCGTCATTCCGGACGAAGC  
TGCTCCAGCGCTCGAAGCTTTCGAGGTTGGAGTATGCGTCGCTCGGTTGAAGAGCAGGCGCTCTCCCGGG  
CTTGACGGCATTACAGGTGGGATCTGCAAGGCGGTATGGCGTGCCATCCCCGAGCACCTGACAGCGTTGT  
ATTCCCGCTGCCTGGCAGAAGGATACTTTCCCTTGAGTGGAAGTGCCCGCGTGTGGTTGCGCTCCTCAAG  
GGCCCCGACAAGGATAGGAGCGATCCAGCTTCCTATCGGGGCATCTGCCTGTTGCCAGTGTTTGCCAAAG  
TGCTTGAGGGGATCATGGTGGATCGAATGAAGGAGGTGCTTCCGGATGGAAATAGATGGCAATTTGGCTT  
TCGACCTGGACGCTGTGTGCGAGGACGCCTGGAAGCACGTGATGACCAGCGTTGCCGCCAGCCAGGCGGTA  
TACGTA CT TGGTCTCTTCGTGGACTTTAAAGGCGCCTTTGACAACATTGAGTGGAGCGCCGCGATGCGCCG  
CTTGATCGATGCGGGATGCAAGGAAGCCAGCTTGTGGAGAAGCTTCTTCTGTGGCAGGAAAGCCAGGATG  
ACCAGCAGATGTGGCGAAGTCGAGGTGGAGGTCACGCGAGGGTGTCCCCAGGGATCCATCAGTGGGCCG  
TTCATCTGGAACACCATGATGGATGTCCTGCTCCAACGCCTGGAGCCCTTGTGCACATTTAGTGCATATGC  
CGATGACCTGCTGGTTCTTGTGCGAGGGAAGGTCGAGAGCTGAACTGGAGCGTCGAGCAGCTGAGCTGATG  
TCCGTCGTGGGAACTTGGGGAGCCGAGGTCGGAGTGTGATCTCAACCAGCAAGACGGCAATGATGATGT  
TGAAGGGGCGTTTTGCGGTTTCCAGGCCGCCCGTGGTACGGTTTGCAGGAGCAAGCCTACCATATGTCGA  
CAAGNNCCGGTACCTTGGCATCACAGTCGGTGAACGGTTGAATTTTCAGCCGCATATCGCAGGATTGCGG  
GATAAACTGACTGGAGTCGTGCGAGCATTAGGCCGCGTGCTACGGGTTGACTGGGGCCTCAGTCCCCGAG  
CCAGACGCACTGTATATGCCGGA CT CATGGTGCCTTGCGCACTGTTTGGTGCCTCGGTATGGTATTCCGCG  
GTCGGGGGAGAGTCGGGGGCCAGGAGGCGCCTCATCTCCGGNATGCCGTACAGTGTCCACCGTGGCACTG  
CAGGTGCTTGGCTGGAGCTCCGCCGTTGGATTTGGTTGCCAAGCAATTGGCAATCAGATTCAAGGTCAAG  
CGTGCCCAACCGCTGGAGGATAGTGA CTGGCTGTTCCGTCTAGATGTGGCAAATCTAGACCAGAGGCGGA  
TGAAGGCGTTGCTGGACGAAGGCATGTGCTCCGAGTGGCAACGGAGATGGGATAGTGATGAGCACGGTC  
GACCGACTCATCAGTTTATCCCGGACGCATGCTTCGTCTACAGCCGGCGAGACTTTGGATTCCGGTCTTCAC  
GCTGGATTCTTGCTGACGGGCCACGGGTCGCTAAATGCATTTCTGCATCAGAGAAGTCTGAGTGCAACGC  
CCGCATGTCAATGCGGTGCGGAGCATGAAGACTGGCAGCACGTGCTAGTTGCTTGCCCACTCTATGCAGA  
TCTGCGAGACCTCGACGGACTTGGTGTGAGGAGAGAAGGTACCCGTTGGGACTTTTCCCGGGTCTGAG  
ACACCAGAGCGGCTGCTACTCCTGGAGATGTTTGCGCGAGCGGTGTTTGCTAGACGGCGGCGAGGGATGG  
AGTGAAGTGCAACCACACAGGGCCGACCAGTGCCGGGCTGACGTTAGCCAAA ACTGGGAGTGGCATGGA  
CCGTGTCACGGAGCCGAACAGAGCTTAATCTGGTAGACAAACCCCAATTTGGGGTAAGTCGAACAATGGA  
TGACCCATTCCGTGTTTGCTGTCGAACAAA ACTGGGGAGTGGCAATTGCTACGAACAGCCGACCAAGCTG  
TAATTTGGTACCACGGGTAAACCAGGAGCCACGGA ACTCGTTCCGTCCTGGTTAGTTGGTGCGGCCCTTCG  
GGGAGTATCGTGGTGGCTGTGGTTCGATACCCAATTGTGGGGAGAGTTTTCTACTCGGCGTGGAGTTGCGT  
GTCAACCGGGTGCTGTACCCATAGACCAGCGGAGGTATAGATAGACCTCACCTCCCACCAAGGGGGAATG  
TCATGTTGACAAGCATGCATTCAATTTGGTACCGAAGGGGCACTGCACATGCAGTGTCTTGAGGGGGCG  
CTAGTCCGACGCTTTGTTTCGGCTCGCTGTATTTGCAATACCGTGGTAGTAAACCCCTACGGGGTACACGC  
CACGTTAAACAAATATGTTTTGTTTTGTCCCTATCTACCAGTTTGTTCAGACGNTCGTCGGGAGCAGACG  
TGTCGCGGAGTTATTTTTGTGTGCGAAAACAAAAGATAAGGTGCAGGTGTTTCGCTTTGGCGTAAACAAAGC  
CATAAACTTAACGGGACA ACTTGCGGTAAATAGCAATAAAACTGCTTGTGCCCAAGACAGCGCGAAAG  
CAGTGCGAAGCAGTGCAAACGCGTTC ACTGCTTTATAAGCAGTGCACATAGTGCGAAGCAGTGCGGAATT  
TTAAAAAGCAGTGCAAACCTGAGTAAAACAGTGCAAGCAGCGCAAATAGAGCAGTGCGGTTTCGTCAACC  
AGATACCGACGGAGGGCGCCACGACAATGGACGCCAGAAGCGTGGCCGGCACGGCGTCTAGTGCCGAGT  
CGGTTGCCAGCGTCGCCGCCGATGGAAGGAGGAGGGTGAGGAGAGGGAGGGGGCCGTAGCACGATTTC  
CCCCCTGCGTACCCGTTGACCCGAAGAGGCAGGCGTTGGAAAGCGCGGATGAGTTTGCCAAGCCCGCCAC  
TAGGGCTGCTGCAAAAAGAGCCGCTGATGCTGCCGCTG CAGAAGAAGACGTCAGAGCCGCTGCCGCTGCC  
GCCCCCATCATCGCGCTTGCCCCAGCATGGAGGATAATGGCCGAGGGGACAGGGGCGATTATAGCGGAG  
CTTTCGGCAGCTGCCGAAATGACCCGCCTTGCCCTGGTGGGTGTCGCCCCCGAAGCCGCGCGCGAAGTGT  
CGGCAGCCGTTAAGCGATTGGAGGAGCTGTCCACGTGCTGGCAGTGCGGAACGCTCTGCTCGAGAGCCT

GGCAGGCAGATCGTCTGCAGCACAGCTCGCCGCCCCCACCCTCACTGCTGCTCACCAAGTCGTCCACCAA  
GTTGCCACCATGCTGCCCCGACCGCTGTCCCCGTCCCAGGAGTGCCGATCGCTGCCCCACGGATCAACA  
AGCCAGTTGAGACGTGGTCCGCGGTGGTACGAGTCGGGACCCGAGCGAGTCGGGAAAAAATGGTGGCCAA  
ACGGATCATGG

>160\_rnd-1\_family-268\_\_LTR\_\_Gypsy

GAAATCCAAAAACAAGTAGGGAAATTAATAAACGACAAAATCGTAGAACCGTCTGTATCCGAGTATAAC  
AGCCACTCTTGCTAGTTCCGAAAATATCATTACCAAATTCGGAAGAAAAGAAATAGCGATTAGTAATTG  
ACTATCGCCAAATCAACAAAAAATTACTTTCTGACAAATTAATTCTCCCCAGAATTGATGATATTCTAGAC  
CAACTGGGCAGAGCTAAATACTTTTCATGCCTTGACTTAATGTCAGGCTTCCACCAAATTGAACTTGAAGA  
AAATTCAAGAAATATAACATATTTTTCAACGAGCAATGGCTCATATCGCTTCACGCGATTACCATTGTTGTC  
TTAAAATAGCACCGAATGCATTTTCAGAGAATGATGACTATAGCATTCTCGGGTTTAGAACCTCTCAGGC  
ATTCCTTTATATGGATGACTTAATGGTGATAGGATGTTCCGAAAAACACATGATTAAAAACTTAACTGATG  
TTTTAAATGTATGTAGGAAATATAACCTAAAGTTGCATCCAGAAANATGTTAATTTTTTCACGCATGAAGTG  
ACATTCTTAGGTACAAATGCACTGACAAAGGAGTATTGCCAGATGGCAAGAAATTCGACGTCATCAAAA  
ATTATCCTATCCATGATGCGGACAGCGCGAGACGATTTGTAGCATTCTGCAATAATTATCGTCGATTTATA  
AAAAACTTCGCCGATTATTCACGGCACATAACTAGATTATGTAAAAAGAATGTTCTTTTGAATGGTCAAG  
TGCCAAAACGCATTCCAATACCTCANAGAAAAGCTTATGCATCCCACATTATTACAATATACTGATCTTCG  
CAAAGAATTTTGCATTATAACAGATGCTAGTAAACAAGCTTGCGGAACGGTTCTAACTCAGAACCGTGAC  
GTAATTCAGCTCCCAATATTATGCATCTTATGCATCTCGTTCATTTACAAAAGTGGGAAAGCAATAAGAGC  
ACAACAGAACAAAGAGTTAGCGGCAATTCATTGGGCAATTACCCATTTTAGATCATATATTTATGACAAAC  
ACTTTACTATTAAAAACGGATCACAGACCATTGACATATCTTTTTTCTATGACTAATCCCAGCTCGAAATTA  
ACTCGCATGCGGCTAGAGCTTGAAGAAAACCACTTCACAGTAGAATACCTAAAGGGAAAAGATAATTTTCG  
TAGCAGACGCACTTTTCGCGTATTAATATAAAAAGAACTCAAGGATATGCAACATAAAGTCCTGAAAGTCAC  
TACCAGGCGACAAATTAGACAAAAAAACTGTACAGTAGAAAATTATGAACTTCTGCCAAGGCAAAGTC  
ATAAAAATGTATCTAAGCCCAACGTACATGAAGTCATTACAAACGATGAAGTACGAAAAAAAGTGACCTT  
GCGCATAACAGAATCTAAATGTTTATTTAAACATGGAAATAAAATTATCGCAAGAATTGAAGTTAGCGAT  
TTAAATACTAATGGAATCCTCGACTTAGTTTCAAGTTCTTCCAAAGGCTTGAAACAGAAGCCGGTATATTTAA  
AATCAGCCAACTCAAAGTGGCACCGAGTGAAAAGGTCTTTGAATCAGTTTCAATAGATTATTTTAAAAAT  
TTGAGCAATATAATATTTAAATCTTTAAGAGTAGCGCCACTCCAGCCGGTGACCCAAATAAACGATGAAA  
AAGAGATACAACAAATACTGTCTACATACCATGACGACCCAATTCAAGGAGGCCACAGTGGCATAACAA  
GAACGCTAGCAAAAATAAAAAGACACTACTACTGGAAAAATATGACGGGTCATATAAAAGACGTACGTA  
CGTGCAGATGCCAAATGTCTAAAATAAAGACACACACAACAAGTAGGAGCTTGTAGTCGGGAGCTCCCG  
ACTAGGGGACACCCTGAACCCTCTACTTCCAACATCAAATGCATATATATATTCTATTTTAAAGCTATAT  
GTCAAGTTTGGTGACTCTAGCTTTTATTATTTTCCAAAATTGGCCAAAAAAATAGGATATCGATATCGTTT  
CTTATCGATTGCTTGGAACGGAGTAAGTTATCGATTATCGGAAACAACTCGATTGCGCAGGCACTAG  
GAGCAACTACATCTAAAATTTCAAGTCTCTAGCTCTCATAGGTTCTGAGAACCTTGCGTTCATACATACGG  
ACGGACGGACGGACGGACGGACGGATGGACAGACAGACGGACATGGCTAGATCGACTCGGCTATTGATG  
CTGATCAAGAATATAAATACTTTATGGGGTTCGAAGATGCTTCCTTTTGCCTGTTACATACATTTGGATTTA  
AATAAATAATAATGTCAACAAAAAGTTAATAAAGAATATATATATTTAATGGAATGGAATGAAATTGTTT  
CTATATTAAGCAAACGTTCTGAGCTTGATAGATCATTTAAGTGCCTCAATAAAAGTGCCTAATATCAAAC  
CAAACAAAAATAAAACATGTTCAAGTTCTGGTAGAATCATACAACAGAGTACGTGACATTGTAAACAACA  
ATGGACGTAGGTTAAGCGATTTATATTTAACACAATCAATTGACGTGTTAAAAAGGCTACGTGAAAATAT  
TAGACATATTTTCGGAAGACATAATTTTCAAATATTGTTCCGCATCGCGCTAAATACACCAGCAACATTCG  
AAAATCACTGATTTAATGATATCAGTAGAAGAAGAACTTCGAACAAAAGCAAGAACAATCGAAATAGT  
CGACATGGCTCAAACACCAGTAGATTTTCTTAAGTTAGCCTCATCGCTCTTACCAGAGNTTGATGGCAAGG  
CAGAAAATTTAAAAAGCTTCATAGATGCTCTGAATCTGGTAGATTCTCTAAAAGAAACACAACGAAGCAC  
TTGCTGTAAGTCTTATTAAGACAAAACCTAAAGAGCCATGCCAGGAACCTGATAAGTGATGAGAACACTAT  
TGCAGCTCTCATATCGAACTATCGGACAAAGTAAAATGAGAGTCAGTAGAAGTTATTTCTGCTAAACTT  
CTAAACTNACAACAAAAGAGCAAAACGGCCAATCAATATACCCAAAAGGTAGAAAAAATTGAAGGAGCCT  
ATATCAGTGAAGGTCTAAGCCAATCACTTGCAAAACAAATACAGCACTACAACAGCTGTAAAGGCTATGA  
CCCAAAATTGTTTCGATCGATAAGGTAAAACCTTATCATACAGGCAGGCACATTCACAAATATGAATGATGC  
CGTCTCCAAATTTGTCAATAGTTGCACGGAGGTAACAGGTCAAAGTCAGCACCGCTCCGTACCNCCGANG  
AGGTAAGACGTGTTACAGCAAAATAGTACACGAGGCCGAAGTTAATCGTGGCAGAAATTACGACCACAA  
CAATTACAGCGGCGCGTAATAANAACAACANCAATAACGACAACAATAACCGTGNAGGAAGACGAGGC

CAAAATCGGGGAAGAGGCCGCGGGAACTCCAACCAAGGTAACAATTATAACAATGTGAGAGTGGCGCAA  
AATGCGTCGGAAAACCTCTCAGAACCCTTTAGGAAACAATCAGTAAATGCAAAGGTTTCATTGCATCAATTA  
CAGTCTTAATATATTTGTCACTCTTTATAATCATTCAACTGAAAATAAACACACATTTCCTAATAGATACTG  
GTGCAGATATCTCACTTTTAAAAATAAATTCAGATAATTTCAAAATTCAAGAAGACAAAATTATAAACAT  
CCAAGGCATCGGCCAGGGTGTATAAAAATCGCAAGGAACAACCTTCAACAGAACTTCAACCAACAAAATA  
TATTANTCCACACGAATTTTCATTTAGTAGACTCCGATTTTTTCAATACCGTGTGATGGAATAATAGGCATTG  
ATTTTATTAAAAAATTCAATNGCCAATTAGACTTCAAACCAAGTGAAGACTGGTTTATAATTAGACCTCAA  
AACTTAAATTATCCTATTTATGTTCCAATGCAACAATGCATTTCTTCTGCCAGCCAGATCCCAACTAATTCTG  
AAAAATAGACATTAATTCAGTAAACGATTATATATTTGTTCCAATCAAGAAATACATAATGGAATTTAT  
GTTGCAAATACAATAGCAGCATCCAACATGTATACATTTCGCCTTCTAAGCACAACCTAATTTTCGACCAATT  
GGTCAAAGTTAACAAAATCGAATATGAAAATTTAACAGATTACGATATTCATAACACTAATCCAGAAAAT  
AGAAGCTAACAAAGTACTTTCAAAGTTAAAGAAAAATTTTCCAGAACAATTCAGAAATCAATTAACAGAAT  
TATGCACCAAGTATAATGATGTGTTTCGGACTGGGAACCGAACCAATAGCGACAGATCATTTTTTATAAACA  
AACATTA AAACTTAAAGATGATGAACCCATTTATATCAAAAACCTACAGAAGCCCGCATAGTCAAGTTGAG  
GAAATCCAAAAACAAGTAGGGAAATTAATAAACGACAAAATCGTAGAACCATCTGTATCCGAGTATAAC  
AGCCCACTCTTGCTAGTTCCGAAAAAATTATTACCACATTCGGAGGAAAAGAAATGGCGATTAGTAATTG  
ACTATCGCCAAATCAACAAAAAATTACTTTCTGACAAATTCCCCTCCCAAGATTGATGATATTCTAGAC  
CAACGGGGCAGAGCTAAATACTTTTCATGCCTTGACTTAATGTCAGGTTTTTACCAAATTGAACTTGAAGA  
AAATTCAAGAAATATAACATCTTTTTCAACGAGCAATGCCTCATATCGCTTCACGCGATTACCATTTGGTC  
TTAAATAGCACCAAATTCATTTTCAGAGAATGATGACAATAGCATTCTCGGGTTTAGAACCTTTTCAGGCA  
TTCCTTTATGTGGATGATTTAATGGTGATCATGATTA AAAA ACTTAACTGATGTTTTTAATGTATGTAGATAA  
TATAACCTAATGTTGCATCCAGAAAAATGTTTCATTTTTTCATGCATGAAGTACATTTTTTAGGTCACAAATGC  
ACTGACAAAGGAGTATTGCCAGATGACAAGAAATTTGATGTCATCAAAAATTATCCTGTCCCTCATGATG  
CGGATAGCGCGAGACGATTTGTAGCATTCTGCAATTATTATCGTCGATTTATAAGAACTTCGCCGATTAT  
TCACGGCACATAACTAGATTATGTAAAAAGAATGTTCCTTTTGAATGGTCAAGTGAATGCCAAAACGCAT  
TCCAATACCTTAAAGAAAAGCTTATGCATCCACATTATTACAATATCCTGATATTCGCAAAGAATTTTGC  
ATTATAACAGGTGCTAGTAAACAAGCCTGCGGAGCGGTTCTAACTCAGAACCGTGACGGAATTCAGCTCC  
CAATAGCTTATGCATCTCGTTCGTTTACAAAAGGGGAAAGCAATAAGAGCACAAACAGAACAAGAGTTAGC  
GGCAATTCATTGGGCAATTACCCATTTTAGACCATATATTTATGGCAAGCAGTTTACTATTAAAACAGAAC  
ACAGACCATTGACATATCTTTTTTCTATGACTAATCCCAGCTCGAAATTAATTCGCATGCGGCTAGAGCTT  
GAAGAATACGACTTCACAGTAGAATACCTAAAGGGGAAAGATTATTTTGTAGCAGATGCACTTTTCGCGTA  
TTAATATAAAAAGAACTCAAAGATATGCAACATAAAGTCCTGAATGTCACTACCAGGCGACAAAGTAAACA  
AAATAAAAACCTGTATAGTAGAAAATTATGAACTTCTGCCAAGGCAAAGTCATAAAAATGTATCCAAGCCC  
AACGTACATGAAGTCATCACAATGATGAAGTACGAAAAGTAGTGACCTTGCGCATAACAGAATCTAAAT  
GTTTATTTAAACATGGAAATAAAATTATCGCAAGAATTAAAGTTAGCGATTTATATACCAATGGAATTCTC  
GACCTAGGCTAGTTCTTCCAAAGGCTCGAAAAAGAGACCGGTATATTA AAAA ATCAGCCAACTCAAAGTGC  
CGCCGAGCGAAAAGATCTTTGAATCAGTTTCAATAGATTGTTTTTAAAAATATGGGCAATGAAATATTCAA  
ATCTTTAAGAGTAGCGCTACTCCAGCTGGTGACCCAAATAACAGATGATAAAGAGATACAACAAATATTG  
TCTACATACCATGACGACCCCTATTACGACCTCAAGGAGGTCATAGCGGAATAAGAAGAACGCTAGCGA  
AAATAAAAAGACACTACTACTGGTAAAATATGACACGTCATATAAAAGAGTACGTACGTAGATGTCAA  
AATGACAAA

>9\_rnd-1\_family-410\_\_LTR\_\_Pao

TGTTGGATTCTGCAGCAGCCTCATCAAATTAGCATAAGCAAACATTCATGTAAACATAAGAAGAGGTTGT  
AATTTTGGTCTAGTGGAACAGCTGTTTATTATAAACAAGGTTGGCAAGCCTTTCTTGCATTGTTCGCAGCT  
GCTATAAATTGCATATTCCTTTTTTGTCTGCTCTCTCAGTTCGTTGTTGATCGAGGCGAAGCGAAGAACCA  
ATTCTGAGCCACAGCCAAATAACCTTATAATCTACATAAATTTGCCTAATAAACTGAATTATAACGTGTTG  
TTGTGAAAGGCCAAAATTTACTTATTTCTTGGTTTAGGTTCTAAACAGTTGCTAAAAAACATTAGTAACTC  
AACATTTGGAGGCCCCGGCGAGATTTAACATTGCAGTGCACACAAGCAAAAATAAATCTATTGCAAATTAA  
AATTGTGATTATTCAAGTAGAACATAATCATCGTAAATTGTTATAATTAGGCAAGTGCAAACCGCCTGTGT  
GAGCTGACCATTTACAGCTCCCAAATATTCGCATATACATAAACGCCGCTAGTTGACTTTCGCGCTCTTCC  
CCTTGCGCGGTCATTTCGCCGGCTCAGCTTATATACATACGCTTGACATAAGCAGCTGCACAATTCGTTCGC  
ATGTTGTGTGCTCAGTTTGGTGTCTGATTTTGTGCTTGTGAAAAAATGATGCAAGGCGAGAACACAGATG  
ATATGCAGTCAAACAGGGTGTCTTTTCTTAAGCGCAAAGCGGTTGCATTGTTTCGAGCGAGCCAAGTGTATT  
GAAAATGAATTATCTGAGGATAAAATTAACAACCTTTGTGCCGTCGACTTAGAAGTGCGCCTTTTGCTAAT



TGAACAACTAAGTCTGCCTTTAATACCGCGCATAACTCGCTAGAGGAGCTTAATTTTCGATGAAATTGGC  
AGCAAACCTACGCGATGATTTTGACGAGTTGATCGCCATGGTTGAAGCTCGCGTTCGCGTAAATATTCAGC  
GTCGTCAATCTAACGGCCCGCCCCACTCAACCTTTCTTCGTCATGAGGATTTGCCAAACCAAACCTTGATC  
TTAGCCAAACAGAACGCGCCTGCCCGAGCTCAAATTACCAACATTTTCCGGTGGTTATACCGAATATTCGGA  
CTTTATCGCGATGTTTGAGTCAGTTGTTCGACAAGGATACCGAGCTGTCTAACATTGAAAGGTTGCAGCATC  
TTCGTTTCATGTTTGTCTGGCCCTGCGTTGGATTTCGGTTCGATCTTTGGAGTTTTCGGGTGCCAATTATCCTG  
TGGCTCTGGATATCCTAAATAGAAGATTTAGTAACAAACGTCTTGTTTTCCAGGCACACATCAATGAGATT  
CTTGGGCTCAAGAGGGTAGATTTCGGAGTCGGCTTCAAAACTGCGTGAGTTCTCGGACAAGGTCAATTTCGC  
ATATGCGTGCCTTACAGAATTTGGGCAGTTTGGAGCAAATTTTCGGGATGCATAATAGTCCACACGCTGCTT  
CAAAGGTTGGACACCCAGACTCAGACCAAATGGGAGGAGGCCGAGGCATTGACAAAATCCCGACAGCC  
GATGAGTTCTTCACATTTCTGGAAAGGCGTAGTCAAAGGCTGGAGAGCGTGCAACATGCCATGTCATCCC  
ATATAACCAATTATCAGGTGGGCAAATCCAACCATAACACTAACCACAGCAAAAAGAGTGCTTGTAGCTGA  
GACTAACCAAAATGGGTGCAGTTTTTGTGATGCGTCTGGTCACGGGATCTACACATGTAGTAAATTCGGA  
AATTTGTCTCCATCCCTTCGGCATAAGGAAGTCAAGAAACTGGCCCTTTGTTATAACTGCCTAAGGAAGGG  
ACACCAAACCTCGGTCTTGCAGTAGTAGTCATTGTTCGTAAGGAGGAAAGCATCATACACTGTTGCATT  
TTGCCACTTCAAGAGAAGCTGACGCGCCGACACCATTACATACATCGGCTGATTTGGGCGCCGCCACTTC  
GACGCACTCTCACTCCACTACCTCTCTTGCTGTCCAAGGTCTTCAGTCTGGTGTGTGCTCCTGGCCACTGC  
AGTGGTACTGGTAAAGAATAGTTCTGGTTCCTTGTTCCTGTAGGGCCTTATTAGACTCAGGCTCGCAGT  
TGCACATGGTCACATCCCGTTTCGCACAGAGACTTCAGTTAAGGAAAACCAGGTCGTCGACAGTTGTCAT  
GGGTCTCGGAGACACAAGCGTCTCTACTGAAGGATCAGCTGTTAGGATTAACATGAAGTCACAAGACTCA  
GATTATTCAGCCACCTTTGATGCTCTTGTGACTCCAACAATTACCGATAGTCAGCCCAGCTTCGTCATCGA  
TACATCAGACTGGAAAATTCCCTCGAACATAAGGTTGGCTGATCCTGCGTTCAACAAACCACAGCGAGTG  
GATCTCTTAATTGGAGCGAGCCTTTTCTATGAGCTTTTGTCTGTTGGGCAAATTGTGCTTTTGCCAGGACTA  
CCTCTTCTGCAAAAAACTCGTCTTGGCTGGGTCGTGACCGGTGGATTTGAGAGACCGCGCAGTACCTCGTT  
GTTGGCTGCCGGCCGCACTCCTAATAGCGAAGCTAGTCAGTTGGACGTCCGTCTGGATGAGTTGGTTCGGC  
GGTTTTGGGAAATTGAAAGCTTGGAAAGAGCCTACAGTAAAGGCCACCAAAAAGAAGAGGCGGAATGCGA  
GCAGCATTTTGCCAATAACTTCTCCCGTTTACCATCCGGCGAGTATTCAGTGCGGTTGCCTCTGAAGCGGA  
GTGCAGAGCTTCTAGGAGAGTCTTATGGCCAGGCTCATCTTCGATTTCTCAGTCTTGGAGCGAAAATTGGG  
TCGGAATTCGCATCTGAAGGAGCAGTATTCGGCATTTCATCAAAGAGTTTCTGGATCTAAATCACATGTGCG  
GAGTTAGTCCAGAGTTGAGTGGCTGTTGTAAATACTTCCTCCCACATCATTGCGTCTTGAAAGAAGACAGC  
ACCACAACCAAGTTGCGTGTTGTGTTTGATGGCTCAGCAACTACTGATTCTGGACATTCTCTTAATGATGT  
ACTGATGGCGGGACCAATCATTCAACCTAAGTTGTTTCACATTCTGATTTCGCTTCCGCACATATCCTGTTG  
CTCTCACAGCTGATATTTGCAAAAATGTATCGTTGTGTCCGAGTGACTTCGCCTGATAGTTACTTCCAGTGC  
ATCCTGTGGAGGGACTCGCCTCAGAAGGATATCGAAATCTTTAAATTAGATACAGTAACATATGGGACCA  
AATCAGCATCATTTTCAGTCCGTGCGCGCAATGCACCAGTTGGCCTTTGATGAGCGTGATGCATTTCCAATT  
GGATCGGATGCCATCAAGCAGGAGTTTACGTTGACGATTTGATATCCGGAGCCAACTCAGTTGCTGAAG  
CCAGAGAGAAAATTCGTCAGACGGCTGGGATATTGTCTCGTGGAACCTTCAAGCTTCGAAAGTGGTGTTC  
CAGTCACCAAGAAGTACTCAATGGAATAGCTTATGAAGATAGGGAACAGTACTTAAAGTTTCGATGATGGA  
AGCGATGTCACCAAGGCCCTTGGTCTTGTATGGGATCCAGCGATCGACCAGTTGCTATTTTTCATTTTCTGTT  
CTAGATTGTACTGTTAAACCTGACGGCGATCAGTTCTGTCTATTGTTGCCCGGTTTTATGATCCGCTTGGA  
CTTTTGGGACCAGTCATAACTAAGGCAAAGATATTTCTTCAACAGCTTTGTAAGGACAAATTAAGTTGGGA  
TGAAAGCTTGCCGATTGCACGTGATACGACCTGGAGGGAGCTATGCAGCAGTTTTTCGCAACATTCGCCAT  
GTATCGTTTCCCAGAGTAGTACTCTTCGAAGGAGCTGATGTTGAAATACATGGATTCTGCGATGCCAGTGT  
GGAGGCCTATGGAGCCTGCATCTACGTAGTGGCCAGGAGTCCACTAGCCACAAGTCGTATCCTTTGCTCC  
AAGTCTCGAGTTGCGCCATTAAAAACATTGACTGTCCCAAACTGGAATTGTGTGGAGCGAAGCTGTTGG  
CTAGTCTGATGCATGAAGTCAAGCGCACAGGCATCTTTGTTCAGTCAGTTTTATTGCTGGTGCGATTTCGTCC  
GTTGTCTATCCTGGATAAGAGATGAGCCCTTCAAATTTAACGTTTTTCGTGGCAAATCGTGTGGCTGCCAT  
ACAAGAACTCACTGCCAGTATGGAGTGGCGATATGTTCCGACGGACCGAAATCCAGCTGACATTCTTTCT  
AGAGGCACAGTTCCCGACGTCTAGCCCAGTCGGAGCTCTGGTTTCATGGCCCATCGTATCTATTAAATGG  
TCGCCTAAATTGGCCGGCGACCTGTCTGCCTGAAGCTCCAACCATTTGAATTGAGGAAAAGAGTACTAATT  
CTTAAGTCTCCACATGCAGATTTAACTCTGGGATGCAAGCACGCCAACTCTTTTGGTTCCATGCAGCGCAC  
ATTCGGCTATGTGTACAAATTTATGAAGCGTATAAGGCATCATGGACTCACTGTTGCAGACATTCATCACG  
GCACTCGCATTTCTTTCGGGTTGTACAGAGAGCGAACTTGTGGGATGACATCAAGGAGATTCAATTCAT  
GGAAATGTGAAAAAATCCAGCTCCGTTGCATCTCTTGACCATTTCTGGATGAACGTGACCTCCTCCGCGT

CGGTGGCCGGCTTAACAATTCGTCCCTGGACTATGATGCGCAACACCCCATTTATACTGCCTCGGCGTCATG  
CAATCACCTTAGCTGTCATCGTTTCAGTTTCATGAGAGGAATCTACACCCTGGTCCCCGTGCACTTCTANCC  
AAAATTCGACTTAAATATTGGCCGATTGGTGGATTAAGAACAGTCTCTAAAGCAGTCAGTAGATGTGTGA  
GGTGCTTCAGAGCGAGGCCCATTTTTGTTCGAGCCTATGATGGCAAGTCTTCCAAGGGAACGTCTGGAAGT  
CGTTCGAGCCTTCACCGTAACCTGGAGTCGATTATTGCGGACCCTTCTTCTATAAGTCGGAAGTTCGTACGA  
GGCCATCCATCAAGTGCTATGTCAGCGTCTTCATTTGTTTCACCAGCAAGGCAATGCACCTAGAGCTAGTC  
AAGGACCTATCGACTGCTACATTTTTGAGTGCCCTGAAGCGATTTCATCGCCACTCGTGGCAAACCCAGTCA  
AATTTGGTCCGACAACGCAACAACTTCGTTCGGATCGAAGAATGAGCTGGTGGATTTGAAACGTCTCTTG  
CTTAGCGATCCCCACATGGAAGCAGTTCGGCAGTTCTGCCTCGCCGATGACATCGAGTGGAATTCATCCC  
CCCCGTTCTCCGCACTTTGGTGGACTATGGGAGGCGGCAGTGAAGTTGGCCAAGCACCACTTCTATCGCTC  
TGTCGGCCGCTCTTTACTTACTTTTGAAGAGCTTCGTACTCTTGTGTTGCCAAATCACAGCTATTGTTAACTC  
ACGCCCATTACTCTCGCTTTCAGAGAACCCAGCAGATCTAGATGTCCTGACTCCTGCTCATCTACTGCTTG  
GTGGTCCTTCATCAGCCATCATCGAGCCAGACTTGACCAAATTAACCTACGACCGTTTGGATGGCTGGCA  
GCGTGTGACGCAGCTACAACAGGTGTTCTGGGCTCGATGGCGTGAAGAGTACCTCACCTTGCTACAACAG  
CGAGCTAAATGGCGCACTCAAACACAAGCGTTGTGCATCAACGATATGGTGCTCGTTAAAGACGAAAATC  
TGCCTCCCATGCGGTGGCCGCTTGGTAGGATAGTTAACTTGATTCTTGGGAAGGATGGAGTCAATCGTGTA  
GCCGATATGAAGACCACGGCTGGAATCATCCGAAGAGCCGTAAACAAGCTGTGTCTGCTGCCCCCTTAAGG  
ATTCTGTTGAAAGTCAGGCTTCCAACGGGGGGGAGTATGTTGGATTCTGCAGCAGCCTCATCAAATNAGCA  
TAAGCAAACATTTCATGTAAACATAAGAAGAGGTTGTAATTTTGGTCTAGTGGAACAGCTGTTTATTATAA  
ACAAGTTGGCAAGCCTTTCTTGCACTTGTCGCAGCTGCTATAAATTGCATATTCCTTTTTTGTCTGCTCTC  
TCAGTTCGTTGTTGATCGAGGCGAAGCGAAGAACCAATTCTGAGCCACAGCCAAATAACCTTATAATCTA  
CATAAATTTGCCTAATAAACTGAATTATAACGTGTTGTTGTGAAAGGCCAAAATTTACTTATTTCTTGTTT  
AGGTTCTAAACAGTTGCTAAAAAACATTAGTAACTCAACA

>160\_rnd-5\_family-5240\_LTR\_Gypsy

ACGTAAATGGAACCTTTTTCATAAACCATAATAACATTTTGGATAGAATCCCAGGAACGGCGAACTCTCC  
ACTGCTGAACATTACGGCTAGCCGAGATACTAAGTCTTCCATATCTCCATCTATTGAACGAACGTAATGTG  
GAGGCAATTCAACAGTTCAGGGAGCAAATCAATGAGGACCGGGCCTACCGAGTTTCGTGCATAGCAGGA  
GCTATCTGTTGCGCAACCGTTTTATCGGGTTGACACTTTGGCGAATCACCAAGAAGAGGAAGACTGCAA  
GGCGGCTGAGAGAGGTGATTGCCGGCATAAGGTCGACCGAGGATGGTCATAAACTCGAGGGGGGAATAG  
TTAACTTAAGAATTGCACCAAAATAACGTTGTATAAGAACTTGCACAATACTTATATTGACCCATTTA  
CAACCAAGCACATTCCGCTGACACATGAGTTCAGCGGCCTGACCGCAACGGTCAGCAGCGGTAACCTGAC  
ACTTGACTATGCTGCAAGTATCCGCGTTGTGCTTATGCTGAGTCGGCTTGCCGACTGTAGCTTTGTAGCTT  
ATAGATCCAAGTTTTAGGTATAATTCCAATTCAATTTTATACCACAATTTAGTTTTGTATTCGACGTTTAAG  
AATAAACTTGCACTACTCCGGCACACAGCCGTAAATATCATTGTTATATATTACAAAAACATTGCTGAGC  
CACAAGGCCAGTAATTAGCAAAGAGAGTGAAGTCAAACCCTCCACCATAATCGTCCTAAATATTACTGGA  
GTAGGCATCGCTGAACCAGCAGATTGATATAATTGGCGCCCAACTCGTGGTAGTAACGAAAGAAAATTAC  
CCACGCGAGCGTTCGTTAATAAATGAAACACGCTAACAAATACATTACGTGATTGCTGACCTACGTCAAT  
AAAAGCTAGAAGTTCTTTCTTGAAAATGCTAAAGACCAGACAAAAGGCCTTTGCAGACCCAGACGAGGCG  
TTGCCGTATAACACATCAGTCGTGGCTACCATTAGGACCACNGATGAGCAACCGATCTATGCCAAGCTTT  
ACCCATATCCAATGGGAGCAGCTGATTTTCGTTAATAAAGAAATCAAGGATCTGCTAAAAAATGATATAAT  
TCAAAAGTCCGTCTCTCCCTACAATAACCCAATATGGGTAGTAGACAAGAAGGGCACTGATGAAGCAGGC  
AATAGGAAAATGAGGTTGGTAATGGACTTTCGTAACTTAACGAAAGAACCGTGCCTGACAAATACCCTA  
TGCCAAATATATCAATGATATTGGGGAATTTGGGGAGAGCCAAATCTTTTCAACATTAGACCTCAAGTCT  
GGTTATCACCGATCATACTCGCTGAACGCGACCGTGAAAAAACCTCTTTCTGTGAACGGGGGGAAAT  
ACGAGTTCAAAAGACTCCCCATACTGCGAGAGCAGATTGGCAAATCTTGCTATGTTTATGTCGATGACGT  
AATCATCTTTTCAAGATGAGGAATCCCACATTAAACACGTGGATTGGGTCCTAAAAAGCTTACACGAA  
GCAAACATGAGGGTCTCCGTCGAAAAGTCACGTTTTTTTAAAGAAAAGCGTGAACCTTTCTTGTTTCATAGT  
CACCAGCACTGGCGCCACGACGGATCCTGAAAAGGTTAGGGCAATACAGGAGTATCCAGAACCTAAAAC  
ACTGTTTCGAGGTCAGATCATTCTAGGCCTCGCAAGTTATTACAGATGTTTCATTAGGGACTTCGCCGCAA  
TAGCAAGACCCATCTCGAATATCTTGAAGGGTGAAAATGGAACAGTCAGTAAGCATAGGTCCAGAAATAT  
AAAGGTTCAATTCTCTGAAGTGCAGCAAAGGGCGTTTCAGAAGTTGCGCGATATTTTGTTCATCCGAGAAT  
GTAATGCTCAGGTACCCCGATTTTAAAGAAGCCATTCGATCTAACGACCGATGCTTCGGCTCACGGCATAG  
GTGCAGTTTTGTCTCAAGAGGGTCGTCTTATAACAATGATTTCAAGAACATTGAAGGACAGCGAGGTTAA  
CTATGCAACAAATGAGAGAGAGTTATTGGCCATCGTATGGTCACTTGCCAAGTTAAGGCACTATTTGTATG

GGGTGAAAGACATTAATATCTTCACTGACCATCAACCCTTGACCTTCGCAGTTTCGGAATCCAATCCAAAT  
GCGAAGATTAAAAGGTGGAAAGCGCGCATTGACGAGTCTAATGCACGTATCTTCTATAAACCTGGCAAGG  
ACAATCTGGTTGCGGATGCCTTGTCAAGACAGCAGCTCAACGCTGTAAATGAACAAGAAGTTGAGTCCTG  
CGCAGCAACGATCCACAGTGAGGTATCTCTACCAACACCATTGAGACAACAGACAAACCCTTGAATTGT  
TTTCAAACCAAATAGTGCTAGAAGAGGGCGGTTTCCCCTTAAACGAAGTTTTATTCTTTTTTGGAATAA  
GAAACGCTACTTGATCAGCTATACTTGCATCGAATCGCTGCTAGACGAGCTCGAAGATGTAGTTTCACCCA  
AATGCGTAAATGCTCTCCACTGTAATTTACACACGCTTGAATGATACAAGATGCATTGGTTCGAAGATAC  
CCGGCCACAAAATTCTGGCACTGCAAAAATCGCGTAGTGACGATTTTGCGGTTGGAGAAAGAAGGGAA  
ATCCTCACAGCCGAGCATAATAGGGCCCATAGGTCTGCACAGGAAAATATTAAGCAGGTACTCTCGGAGT  
ACTACTTTCCAAAGATGGCAAAAATAGCCAATGAAATAGTACAAAATTGCAAAACATGTGCTAGGGCTAA  
ATATGATAGACACCCCAAAAAACAAGAGCTTGGGGAGACACCGATCCCCTCACATGTAGGAGAGATGTT  
ACACATAGACATTTTCTCCACTGACAGGAAATACTTTCTCACTTGCATCGACAAGTTCTCTAAGTTTGCTA  
TTGTCCAACCGGTCCCTTCAAGAACCATTGTGGATCTGAAGCCAGCTTTAATGCAACTAATGAATTTTTTT  
CCAAAAGCCAGATCCATTTACTGTGACAATGAACCGTCATTGAATTCAGAGACCATCGTGACTATGGGGT  
CAGCATTTCAAATGCACCACCATTGCATAGCATCTCGAATGGACAGGTTGAGCGCTTTCACAGCACTCTGT  
TAGAACTAGCCAGATGCCTAAAGATCGATAAAGGCATAAGTGACACCGTAGAAGTCATTTTACTGGCTAC  
AAGTGAATACAATAAGTCGATCCATTCGGTCATCGACNAGAGACCAGTCGACGTGGTTCAGGCGCACCCA  
GACGAGCCACAAGAGAACATACAAGANAGGATCAGAGACGCCCAGACGGCGCTCAGAGCTAGGGAGAA  
CGCNAANCGGCAGAATAGGGTCTTCGACGTTGGTGACAAAGTTTTGGTCAAGTCCAACCGAAGGCTCGGG  
AACAACTCACACCTTTATGTGATGAGAAGGCCGTTGAAGCAGACCTGGGGACCGAGGTCCCTCATTAGAG  
GGAGGGTGGTCCACAAGGACAACCTTGCTAAGGTGATCACCACGAGAATAAGGCCCTTGAAGTTTTTTCTT  
ATAATACCNATCTGTTTAGCCGCTTGGCATAGCTTCTTCNAATTAATTATAAGACTTAGATATTAGCGTGT  
GCCCTCAGTTTAAGTTCTGGTGGTGGTGGGTAAACAATATTAACACAAAAATAGCTAAAATTTCCATT  
CCACAGGTTTGAACATAATTCTCATCTTGTCCCTGTCCCTGGCTTCGGCGCGCGTCACCGATTATTCAAACG  
CNAGGTACATCCCGATAGTGATGGACGAATCCTGGTGTGGGAGGATTTTCGCCTACATTAAACACTCGGC  
GAATCTTTCAGAATATGCGCGTGTGGTGGAGGAAACGGTCAGTTTGCTTGACATGTTCCCACAATCTCACA  
TGAAGAAGCTCCTAAAGGTGGACACAGCTCACCTGCAGGACCTGCTGGAAGCGTTGGGCGTACACCATAG  
GGTGGCTAGAAGTTTGGAATTTCTAGGGTCCATGCTGAAAGTAGTAGCAGGCACTCCGGATGCCAACGAT  
TTAGAAAGAATAAGATTTACAGAACGGCAACTAATACATGAAAACAATAGACAAATAGAGATTAATTCT  
AAAGTACAAGACCAAGTTAATAAGCTNACAATTACTGTCAATCAAATTCTCAAGGCCGCGAAAAACACAC  
AAGTNAACACTGAACACTTGTATGAAACGCTATTGGCTAGAAATAGGATGCTGATGATGGAATTGCAAAA  
TTAATGCTTGCAATATCATTAGCGAAAGCAAACATTGTAAGCCCGAACATTTTAGACCATATNGACTTGA  
AATCAGTTTGGCTTGAGGAGCCACCGACACCCCATAGCAGANCTTTTGTCCGTTTCGTCCGTTAAGATA  
CTACAATCGAACAACGCTTTATACTTCATTATTAGGTTCCCAAAAGTTAAGCTAGCTTGTAAGAAAATCAC  
GATTTATCCCGTCGTTTCAGAAAGGCGTAATACTGCGAATAACAGACAACGCCGTGGCAGAGTGCGATGGA  
NACGTTACGCTCTCGAAACTGCGCCGCATCCCCTGGAGCGACGTTCTGCAGNCTCTCANNAGAGAGCT  
CATGCGCCAGAGAGCTACACGCCGGGGGGGGCGGCTAACTGCGAAACCCAGCCNAGCAACCTGGAGCCAA  
TACTCAGGTGGACGAAGGGATGCTAATTATCAACGACGAGCTAGCAGAAGTGCAAGTTGATAACGGCCC  
TAAGACCCGGCTCCAAGGCACGCACCTCATTACGTTTCGCTGATCGGGCCGACGTAAACGGAACCTCTGTTT  
CATAAACCATAATAACGTNTTGGATAGAGTCCCGGGAACGGCGAACTCTCCACTGCTGAACATTACGGCC  
AGCCGAGATATACTAAGTCTTCCATATCTCCATCTATTGAACGAACGTAATGTGGAGGCGATTCAACAGTT  
CAGGGAGCACGTCGATGAGCTGACCGGGCCTACCGAGTTTCGTGCATAGCAGGAGCTATCTGTTGCGCAA  
CCGTTTTTATCGGGTTGACACTTTGGCGAATCACCAAGAAGAGGAAGACTGCGAGGCGGCTGAGAGAGGT  
GATCGCCGGCATAGGGTCGACCGAGGACGGTCATAAACTCGAGGGGGGAATAGTTAACACTTAAGAATT  
GCACCAAAATAACGTTGTATAAGAACTTGCACAATACTTATATTGACCCATTTACAACCAAGCACATTCC  
GCTGACACATGAGTTCAGCGGCCTGACCGCAACGGTCAGCGGCGGTAACCTGACACTTGACTATGCTGCA  
AGTATCCGCGTTGTGCTTATGCTGAGTCGGCTTGCCGACCGTAGCTTTGTAGTTTATAGATCCGAGTTT  
GGTATAATTCCAATTCAATTTTATACCACAATTGAGTTTTGTATTTCGACGTTTAAAGAATAAACTTGCAC  
TCCGGCACGCTGCCGTAAATATCATTTGTTATATATTACAAAAACATTGCTGAGCCACAAGGCCAGTAATT  
AGCAAAGAGAGTGAAAGTCAAACCTCTCCACCATAATCGTCCTAAATATCACTGGACTAGGCATCGCTGGAC  
CAGCAGATCGATATAATTGGCGCCCAGCTCGTGGTAATAACGAAAGAAAATTACCCACGCGAGCGTTTCGT  
TAATAACTGAAACACGCTAACAAATACATTACGTGATTGCTGACCTGCGTCAATAGAGGCAGCAACAGTG  
CAACAACCTTTGCCCTCGTAAAGACACATTGGTAGAAGTGACCGAGGCCACTGAAGCTATCTGGACAACG  
AAGACTACGGCGTTGGAGCTTAATTCCCCTTAGTAGTTGTTTTAGAATCATGTAAGTGGGCTTTTCGTTA

>9\_rnd-5\_family-2490\_\_LINE\_\_\_\_R1

ACCAAGGGGAACCATCCTGCTGGACATATTTGCTTCGCTAAATGTCTGTCTGCTGAACATCGGCACAAGA  
AGCACTTACAGCAAAGCGGGTCGCGAGTCGATCATAGACCTGACGTTTGCCAGCCCAGACGTTGCCCGAG  
ACGCCAAATGGCATGTATCGGATGTATACACCCACAGCGACCACTTTGCGGTGATAACGGACACCTATCA  
ACTTGGAAGCAGAGGCGCCAGTAGAAGGCTCCAACACACGGGATACAAGATGAACACTATGGACCTGGA  
AAGACTCCTCCCTATGGTAGAAGGACTTGGCATAAGAGGGCGACGCCAACAGCTCTGCTGACGCGATAGCA  
GAGACTATCACCAACGCATGTGACGCTATACTGACAAAAGTTTCGCAAGGGTGGNAACGCACATAGACCG  
GTAGCCTGGTGGAAACGAGGACATAGCCAAAGCGCGCAAAGAGTGCCTCGCAGCTAGGCGGAAGAGCCAA  
CGGTCAAGACCGTCCCCAATTTTGAGCACCATCTGCAGAACTTCAGAGCCAAGCGGAAAGTACTCAAGGA  
AGCTATCAGACGCAGCAAATCCCGATACTTTTTCAGAAAGCTCTGCGACGCTGCGGACGCGGAGCCCTTTGGA  
CTGGCTTACAAGCTAGTCATGGGAAGGCTATGCAGGCAACCAATGCCAACAAACCCGGAACAGCTCAAA  
CAAATAGTCCTAACGCTCTTTTCTCGACAGACACCTGGAATTGCACCGCAACTACCAGCAAACGGAATAA  
ACGACTGTGCACCCACCGACGACAATGAGGTACTGAGCATTGCTGCGAAGCTAAAGGCGGACAAATCTCC  
TGGACCAGACGGAATACCGAACGGGGTAATAAAAGCTGTCTATTACTGCACAGCCCAGAAGCTTCGTGGA  
GTTGTACAATCAATGTATAGCGGAATGCACAGTACCACGAAGATGGAAACTCCAGCGACTTGTGCTCATC  
CCGAAGCCCGGCAAGGAAGTAGATGATCCCTCCTCATACCGCCCCCTGTGTATGCTGGACACGATGGGAA  
AAATATTTGAGCGGATAATATGCAATCGCCTAGAATGCAAGCTTGCTGAAGTGCGCGGTCTGTCTGAACG  
ACAATTCGGCTTCAGGAAACACAGGAGCACCACGGATGCCATCAGGGCCGTGGCTGAACTAGCAGAAGA  
CGCTATCCAAGGCACAAGATGGACAGGTGGCACCAACAGTACTGCCTAGTCTGTACGTTGGATGTCAGG  
AACGCGTTCAACTCAGCCAATTGGACAAAAATACTAGAAGCGCTAACGGCCAGACACATCCCGAGCCAA  
CTAATAAAGTTAGTGACCAGCTACTTCCAGGACAGAGTGCTAAATTACGACACAGAAGACGGCCAACGAC  
AGTACAGGGTAACTGGAGGCGTTCCTCAGGGCTCTGTTCTCGGGCCGCTACTGTGGAACGTCATGTACGA  
CGGAGTACTGCGCCTTTGCCTACCAGAGGGCAACACAATCATTGGTTTCGCCGATGACATCGCTGTTGTTA  
CTGTGGCGAAGAACTCGATGAGGTCCTCTTAGGAGCAGTGCGGCCATCGACAGGATAATTGACTGGCT  
ATCCCAGAACGGACTCACGCTAGCGGAGCAGAAGTCGGAGGCAGTCTTAATAAGCAGCAGAAAGATAGT  
TGAGACGACATCGTTGCGCGTTGGCAGTGCTATCATTAAGTCCAAGCCCGCCATCAAATACCTGGGCGTC  
ATGATAGACCACAGACTGTCTGTATAAACAGCACCTGGAGTATATTAGCCACAAAGCGGCCAGTGTTACAA  
CAGCCATTAGCCGAATGTTGGCGAACACCAAGGACCAAGGCAGAGGAGCAGAAGGCTAATCGCTGGAG  
TGGTGACGTCCACAATCCTCTACGGATCCAACATATGGGCCCCCGCAATGGAGGTTGCATCTTACAGCCG  
AGGATGCAATGCTGCATACCGACGATGTGCATTGCGTGTAAGCCACCTGCTTCCGCACTGTATCGGAAGAC  
GCGGCCTTAGTACTGGCAGGCATGATCCCACTCGGCCTGATGGCTGCCGAAAGGCAAAGTGGGGCAACCA  
CCAACAGGCAACTGAGGGATAACACCATCGATCAATGGCAAAGCAAATGGGATGCGAGCTCAAGTGGCA  
GATGGACCCACAGACTAATCCCAAACCTGAAGCTTTGGCTACAGCGGCGACACGGCGATGTAGACCACTA  
CCTGGCACAAATATTTACTGGGCATGGCTGCTTTAAAGCGTACCTGCACAGGTTTAATCATGAGGACGAC  
CCCTTTTGCGAGCACTGTGGGTACGGTGTGATTGAGGACGCGGAGCACGCATTGTTCTACTGCCCACTCTA  
TAGTCGCGAGCGAGACAAAGCGACGGCGGGCAGAAATGATTTGTCTCCGGAGAATCTCGTGGCGCGAAT  
GGTGGCCACTGAAAATGGATGGACAGCCGTTGCTAACATGGCATCGGCTATAATGAAGGAGCTGCGACG  
ACAGGAGAGGATCCGACGCGGCATCGACTGATGAGCGGCTGATATACAGCCGTACCCCGCCCTGCGAAGT  
AGTACTTTGCGGTTGTCCCGCAGGAGCGGGCTACAACCTTTCTACTCCCCACAAAATACCCTTTCTTTTGT  
TTTGTCTTAGTTCCCTTGTAAAATGTTAAGCCGTTATTTTTCTTTTCTTCCAAAATAAAAAAACAACA  
CACACACACACACACACACACACACACACACACACACACACACACACACACACACACACACACACACAC  
ACACACACACACACACACACACACACACACACACACACACACACACACACACACACACACACACACACACA  
CACACACA

>9\_rnd-1\_family-276\_\_LTR\_\_Pao

TGTTGGATTCTGCAGCAGCCTCATCAAATTAGCATAAGCAAACATTCATGTAAACATAAGAAGAGGTTGT  
AATTTTGGTCTAGTGGAACAGCTGTTTATTATAAACAAGGTTGGCAAGCCTTTCTTGCATTGTGCGAGCT  
GCTATAAATTGCATATTCCTTTTTTGTCTGCTCTCTCAGTTCGTTGTTGATCGAGGCGAAGCGAAGAACCAA  
TTCTGAGCCACAGCCAAATAACCTTATAATCTACATAAATTTGCCTAATAAACTGAATTATAACGTGTTGT  
TGTGAAAGGCCAAAAAATTTACTTATTTCTTGGTTTAGGTTCTAAACAGTTGCTAAAAAACATTAGTA  
CAACATTTGGAGGCCCGCGGAGATTTAACATTGCAGTGCACACAAGCAAATAAATCTATTGCAAATTA  
AAATTGTGATTATTCAAGTAGAACATAATCATCGTAAATTGTTATAATTAGGCAAGTGCAAACCGCCTGTG  
TGAGCTGACCATTTACAGCTCCCAAATATTGCGATATACATAAACGCCGCTAGTTGACTTTGCGGCTCTTC  
CCCTTGCGCGGTTCATTCGCCGGCTCAGCTTATATACATACGCTTGATACATAAGCAGCTGCACAATTCGT  
CATGTTGTGTGCTCAGTTTGGTGTCTGATTTTGTGCTTGTTGAAAAAATGATGCAAGGCGAGAACACAGAT  
GATATGCAGTCAAACAGGGTGTCTTTTCTTAAGCGCAAAGCGGTTGCATTGTTTCGAGCGAGCCAAGTGTA

TTGAAAATGAATTATCTGAGGATAAAAATTAACAACTCTTGGTGCCGTCGACTTAGAAGTGCGCCTTTTGCT  
AATTGAACAACTAAGTCTGCCTTTAATACCGCGCATAACTCGCTAGAGGAGCTTAATTTTCGATGAAATTG  
GCAGCAAACACTACGCGATGATTTTGACGAGTTGATCGCCATGGTTGAAGCTCGCGTTTCGCGTAAATATTCA  
GCGTCGTCAATCTAACGGCCCCGCCCCACTCAACCTTTCTTCGTCATGAGGATTTGCCAAACCAAACCTTGA  
TCTTAGCCAACAGAACGCGCCTGCCCCGAGCTCAAATTACCAACATTTTCCGGTGTTATACCGAATATTCG  
GACTTTATCGCGATGTTTGAGTCAGTTGTCGACAAGGATACCGAGCTGTCTAACATTGAAAGGTTGCAGC  
ATCTTCGTTTCATGTTTGTCTGGCCCTGCGTTGGATTTCGGTTCGATCTTTGGAGTTTTCGGTGCCAATTATC  
CTGTGGCTCTGGATATCCTAAATAGAAGATTTAGTAACAAACGTCTTGTTTTCCAGGCACACATCAATGAG  
ATTCTTGGGCTCAAGAGGGTAGATTCGGAGTCGGCTTCAAACTGCGTGAGTTCTCGGACAAGGTCAATT  
CGCATATGCGTGCCTTACAGAATTTGGGCAGTTTGGAGCAAATTTCCGGGATGCATAATAGTCCACACGCT  
GCTTCAAAGGTTGGACACCCAGACTCAGACCAAATGGGAGGAGGCCGAGGCATTGACAAAATCCCGAC  
AGCCGATGAGTTCTTCACATTTCTGGAAAGGCGTAGTCAAAGGCTGGAGAGCGTGCAACATGCCATGTCA  
TCCCATATAACCAATTATCAGGTGGGCAAATCCAACCATAACACTAACCACAGCAAAAGAGTGCTTGTAG  
CTGAGACTAACCAAAATGGGTGCAGTTTTTGTGATGCGTCTGGTCACGGGATCTACACATGTAGTAAATTC  
GGAAATTTGTCTCCATCCCTTCGGCATAAGGAAGTCAAGAACTGGCCCTTTGTTATAACTGCCTAAGGAA  
GGGACACCAAACCTCGGTCTTGCAGTAGTAGTCATTGTCTGACTTGTGGAGGAAAGCATCATACTACTGTTG  
CATTTTGCCACTTCAAGAGAAGCTGACGCGCCGACACCATTACATACATCGGCTGATTTGGGCGCCGCCA  
CTTCGACGCACTCTCACTCCACTACCTCTCTTGCTGTCCAAGGTCTTCAGTCTGGTGTTGTGCTCCTGGCCA  
CTGCAGTGGTACTGGTAAAGAATAGTTCTGGTTCCTTGTTCCCTGTAGGGCCTTATTAGACTCAGGCTCG  
CAGTTGCACATGGTCACATCCCGTTTCGCACAGAGACTTCAGTTAAGGAAAACCAGGTCGTCGACAGTTG  
TCATGGGTCTCGGAGACACAAGCGTCTCTACTGAAGGATCAGCTGTTAGGATTAACATGAAGTCACAAGA  
CTCAGATTATTCAGCCACCTTTGATGCTCTTGTGACTCCAACAATTACCGATAGTCAGCCCAGCTTCGTCA  
TCGATACATCAGACTGGAAAATTCCTCGAACATAAGGTTGGCTGATCCTGCGTTCAACAAACCACAGCG  
AGTGGATCTCTTAATTGGAGCGAGCCTTTTCTATGAGCTTTTGTCTGTTGGGCAAATTGTGCTTTTGCCAGG  
ACTACCTCTTCTGCAAAAAAATCGTCTTGGCTGGGTGCTGACCGGTGGATTTGAGAGACCGCGCAGTACCT  
CGTTGTTGGCTGCCGGCCGCACTCCTAATAGCGAAGCTAGTCAGTTGGACGTCCGTCTGGATGAGTTGGTT  
CGGCGGTTTTTGGGAAATTGAAAGCTTGGAAAGAGCCTACAGTAAAGGCCACCAAAGAAGAGGGCGGAATGC  
GAGCAGCATTTTGCCAATAACTTCTCCCGTTTACCATCCGGCGAGTATTCAGTGCGGTTGCCTCTGAAGCG  
GAGTGCAGAGCTTCTAGGAGAGTCTTATGGCCAGGCTCATCTTCGATTTCTCAGTCTTGAGCGAAAATTGG  
GTCGGAATTCGCATCTGAAGGAGCAGTATTCGGCATTTCATCAAAGAGTTTCTGGATCTAAATCACATGTCTG  
CGAGTTAGTCCAGAGTTGAGTGGCTGTTGTAAATACTTCCTCCACATCATTGCGTCTTGAAAGAAGACAG  
CACCACAACCAAGTTGCGTGTTGTGTTTGATGGCTCAGCAACTACTGATTCTGGACATTCTCTTAATGATG  
TACTGATGGCGGGACCAATCATTCAACCTAAGTTGTTTCACATTCTGATTTCGCTTCCGCACATATCCTGTG  
CTCTCACAGCTGATATTTGCAAAATGTATCGTTGTGTCCGAGTGACTTCGCCTGATAGTTACTTCCAGTGC  
ATCCTGTGGAGGGACTCGCCTCAGAAGGATATCGAAATCTTTAAATTAGATACAGTAACATATGGGACCA  
AATCAGCATCATTTTCAGTCCGTGCGCGCAATGCACCAGTTGGCCTTTGATGAGCGTGATGCATTTCCAATT  
GGATCGGATGCCATCAAGCAGGAGTTTTACGTTGACGATTTGATATCCGGAGCCAACTCAGTTGCTGAAG  
CCAGAGAGAAAATTCGTCAGACGGCTGGGATATTGTCTCGTGGAACCTTCAAGCTTCGAAAGTGGTGTTT  
CAGTCACCAAGAAGTACTCAATGGAATAGCTTATGAAGATAGGGAACAGTACTTAAAGTTTCGATGATGGA  
AGCGATGTCACCAAGGCCCTTGGTCTTGATGGGATCCAGCGATCGACCAGTTGCTATTTTTCATTTTCTGTT  
CTAGATTGTACTGTTAAACCCTGCAGGCGATCAGTTCTGTCTATTGTTGCCCGGTTTTATGATCCGCTTGGA  
CTTTTGGGACCAGTCATAACTAAGGCAAAGATATTTCTTCAACAGCTTTGTAAGGACAAATTAACCTGGGA  
TGAAAGCTTGCCGATTGCACGTGATACGACCTGGAGGGAGCTATGCAGCAGTTTTTCGCAACATTCGCCAT  
GTATCGTTTCCCAGAGTAGTACTCTTCGAAGGAGCTGATGTTGAAATACATGGATTCTGCGATGCCAGTGT  
GGAGGCCTATGGAGCCTGCATCTACGTAGTGGCCAGGAGTCCACTAGCCACAAGTCGTATCCTTTGCTCC  
AAGTCTCGAGTTGCGCCATTAAAAACATTGACTGTCCCAAACTGGAATTGTGTGGAGCGAAGCTGTTGG  
CTAGTCTGATGCATGAAGTCAAGCGCACAGGCATCTTTGTGAGTCAGTTTTATTGCTGGTGCGATTTCGTCC  
GTTGTCTATCCTGGATAAGAGATGAGCCCTTCAAATTTAACGTTTTTCGTGGCAAATCGTGTGGCTGCCAT  
ACAAGAACTCACTGCCAGTATGGAGTGGCGATATGTTCCGACGGACCGAAATCCAGCTGACATTCTTTCT  
AGAGGCACAGTTCCCGACGTCCTAGCCCAGTCGGAGCTCTGGTTTCATGGCCCATCGTATCTATTAAATGG  
TCGCCTAAATTGGCCGGCGACCTGTCTGCCTGAAGCTCCAACCATTTGAATTGAGGAAAAGAGTACTAATT  
CTTAAGTCTCCACATGCAGATTTAACTCTGGGATGCAAGCACGCCAACTCTTTTGGTTCCATGCAGCGCAC  
ATTCGGCTATGTGTACAAATTTATGAAGCGTATAAGGCATCATGGACTCACTGTTGCAGACATTCATCACG  
GCACTCGCGTTCTTCNTCGGGGGAGAGGTGAAGATTCATTCTCATGGAAATGTGAAAAAATCCAGCTCCG

TTGCATCTCTTGCAACCATTTCTGGATGAACGTGACCTCCTCCGCGTCGGTGGCCGGCTTAACAATTCGTCC  
CTGGACTATGATGCGCAACACCCCATTTACTGCCTCGGCGTCATGCAATCACCTTAGCTGTCATCGTTCA  
GTTTCATGAGAGGAATCTACACCCTGGTCCCCGTGCACTTCTAGCCAAAATTCGACTTAAATATTGGCCGA  
TTGGTGGATTAAGAACAGTCTCTAAAGCAGTCAGTAGATGTGTGAGGTGCTTCAGAGCGAGGCCCATTTT  
CGTCGAGCCTATGATGGCAAGTCTTCCAAGGGAACGTCTGGAAGTCGTTTCGAGCCTTCACCGTAACTGGA  
GTCGATTATTGCGGACCCTTCTTCTATAAGTCGGAAGTTCGTACGAGGCCATCCATCAAGTGCTATGTCAG  
CGTCTTCATTTGTTTCACCAGCAAGGCAATGCACCTAGAGCTAGTCAAGGACCTATCGACTGCTACATTTT  
TGAGTGCCCTGAAGCGATTTCATCGCCACTCGTGGCAAACCCAGTCAAATTTGGTCCGACAACGCAACAAA  
CTTCGTCGATCGAAGAATGAGCTGGTGGATTTGAAACGTCTCTTGCTTAGCGATCCCCACATGGAAGCA  
GTTCCGGCAGTTCTGCCTCGCCGATGACATCGAGTGGAATTCATCCCCCCCCGTTCTCCGCACTTTGGTGG  
CTATGGGAGGCGGCAGTGAAGTTGGCCAAGCGCCACTTCTATCGCTCTGTGCGCCGCTCTTTACTTACTTT  
TGAAGAGCTTCGTACTCTTGTTTGCCAAATCACAGCTATTGTTAACTCACGCCCATTACTCTCGCTTTCAGA  
GAACCCAGCAGATCTAGATGTCCTGACTCCTGCTCATCTACTGCTTGGTGGTCCCTTCATCAGCCATCATCG  
AGCCAGACTTGACCAAATTAAACTACGACCGTTTGGATGGCTGGCAGCGTGTGACGCAGCTACAACAGGT  
GTTCTGGGCTCGATGGCGTGAAGAGTACCTCACCTTGCTACAACAGCGAGCTAAATGGCGCACTCAAACA  
CAAGCGTTGTGCATCAACGATATGGTGTCTCGTTAAAGACGAAAATCTGCCTCCCATGCGGTGGCCGCTTG  
GTAGGANAGGTTACTTGATTCTTGGGAAGGATGGAGTCAATCGTGTAGCCGATATGAAGACCACGGCTGG  
AATCATCCGAAGAGCCGTAAACAAGCTGTGTCTGCTGCCCCCTTAAGGATTCTGTTGAAAGTCAGGCTTCCA  
ACGGGGGGAGTATGTTGGATTCTGCAGCAGCCTCATCAAATNAGCATAAGCAAACATTCATGTAAACATA  
AGAAGGGGTGTAAATTTTGGTCTAGTGGAACAGCTGTTTATTATAACAAGGTTGGCAAGCCTTTCTTGCA  
CTTGTCGCAGCTGCTATAAATTGCATATTCCTTTTTGTCTGCTCTCTCAGTTTCGTTGTTGATCGAGGCGAAG  
CGAAGAACCAATTCTGAGCCACAGCCAAATAACCTTATAATCTACATAAATTTGCCTAATAAACTGAATT  
ATAACGTGTTGTTGTGAAAGGCCAANATTTACTTATTTT

>160\_rnd-6\_family-453\_\_Unknown

CCGCGAGCTTTTGAGCTTTAAGAGAATAAGCTTTATCATAACCATAGCTGACTTGCAGCATAAGTTCACAA  
TTGTACTTTAGTTCTAATCTTGGATTCAAATAAATCGGAAGCCTTCAGCCTCCCACTTAAAAANATATTTTT  
TTCCAATTAGTAGCCACTAATCGGTTAATTGGCGCCCAACGTGGGGCTCGCGATTATAAACACAAAAAAA  
GGATAATTAAGAAACAAAATCCTTAGTGATTTCGCGAGTGAGCAAAAGTGCCGATTTACCAGTCCAAGA  
TTGTCTCAAAGAGCATTAAAAATTTTCTAAGAACGAAAATATCGAGTGCCTCTAAAAGAAACATTAAAA  
ATTTCCGACGAACGGAAATACCCTGTTTCTGAAAACCTTGAAGAGTAGTGAAAATACCCTGAGCTGGAAAT  
ATTGATTGTTCAAGACTTAAAAGTGAAATCAAATTTTCCGATTCAAGTTAAATGAAAACATTCCAAAA  
AATTAATCGATCAAAGAAGCGAAACGAATATTTTCGCCAACAAAAATTTNTTCACCAATCAAAAACCTTTT  
AACCAAATAAAAAATATCACGTCAACCTGAGACCCCCATAAAAGAAGACCCTAAAACCCAGAAGGAAGG  
AAGGAAGGAAGACTTGAACGACATATTGTATAATCACCCATAAAGAAAGACCTTTTACGTGAGCCATCAT  
CATTTACTTTAAAAAGAAATTTTTTTTTCTTAAGTAATGAGAGTTTAAATTTGTGTAAGCATTTGTTAGAAT  
AATAAGTGTTATAAACTGGATAACCATATAGAAAGTTTAATTGAAGATTTTCAAAATTTAAAAATGGCTA  
ACAATAATAACTTGACAGCTGATTTGGTAGCTCAGTTGATTGCAACTCAGACCAGAGCGCTTCAAGAGCA  
AATTGCAGAATTGAAGTTACAAATCACTCTCTCATCTAATAATGAACAAGAATATAAGATTACTGAAATA  
AATGACCTTATTCGTTGCGATGAATCTTTTGATGTTATCAAGTCCATACCAGAATTCTCAGGCAGCTATAA  
TGCATATGTTAGTTGGCGCGAAGCCGCTTGCTGTGCCATGCGAATGTATAAAGAAGGAAGTAGAAAGTAC  
GTAGGTGCTTTAACAATATTAAGAAATAAAATAACAGGTAAAGCTAATGACACCTTGACTAATCACGGTA  
CCGTTCTTAATTTGAAGCTATACTTGCAAGGTTGGATTTCGCCTACAGTGNTANACGACCAATCTATATA  
ATAGAACAGGAGTTAAGTATTCTACGACAGGGTAACTTATCCGTTCTCGAATACTACAATTTAGTTAATAA  
AAAATTAACCTTTTGATAAACAAAACCTATTATGACGTATGGTGACAAAGCCNCATCATTACGGAAATG  
AATAAGAAAACAAGTAAGAGGTTCTAGTCGGGAGCTCCCGACTAGGGGAACCTGAACCTCTTATTCCA  
ACACCAAATAAATTAATAAAAAAAAGTTCCCTTTGCAGGGCTCGAATTTGCAACTGACCGCATTACTTACT  
GTCGACTCTACCTAACAGCCACACTAGAAAAAATAAATAATACTTTCCTCGGTAGGGCTCGAACT  
CGCGACAGACCGCACCACTTGCTATGCCTCTACTCAGCAGCCGCACCTACAATTAAGTACTTATTATAAAA  
AAGGAACATAAATAACATAANAAAAACGAGAAAGAAGGGCTATCTTCGGCACGCCAAAGATCTAATACC  
CTTGACAGACCAACCTTTTCATAATGCTCATAGTGCTTTGCCCTATCTAAGAAGTACCGGGAAAATAGTA  
AATGCCGAGTTTGGTCAAGATATCTTGATAAACAAAATGTTTTTTCATACACTTAATTTTCGACCGATCG  
TTCCTATGGCAGCTATATGATATAGTGGTCCGATCTTAATAGGATTTTGCATATATATGAGGAGCAAAGTA  
AACTAATAAATGCCGAGTTTGGTCAAGATATCTTGAAAAACAAAATGTTTTTTCATACAAAAACCTTAA  
TTTTCGACCGATCGTTCCTATGGCAGCTATATGATATAGTGGTCCGATCTTAATAGGATTTTGCACATATAT

GAGGAGTAAAGTAAAACTAATAAATGCCGAGTTTGGTCAAGATATCTTGAAAAACAAAATGTTTTTTCAT  
ACAAAACTTAATTTTCGACCGATCGTTCCTATGGCAGCTATATGATATAGTGGTCCGATCTTAATAGGAT  
TTTGCATATATATGAGGAGTAAAGTAAAACTAATAAATGCCGAGTTTGGTCAAGATATCTTGANAAACAA  
AATGTTTTTTCATACAAAACTTAATTTTCGACCGATCGTTCCTATGGCAGCTATATGATATAGTGGTCCG  
ATCCAGCTGGTTTTACATATGTGCTGCGTGCAACAGAAAGAGGGGAGTTCTGCAAAGTTTCATTAAGATA  
GCTTTAAAACTGAGGGACTAGTTCGCATAGAAACAGACAGACGGACAGACGGACATGGCTATATCGACTC  
GGCTGTTGATGCTGATTAAGAATATATATACTTTATGGGGTCGGAGATGTCTCCTTCTATGCGTTACACAT  
TTCACGACAAAATTATAATACCCTCTGCAAGGGTATAAAAAAGATGCAATAACGNTGCTATTAGAAATGCG  
AGCAGACGCGCATGAATGTGTGCTGCCACATGTATACAGAAATTCTTAAAGCTGCTGCCCCATTCAATT  
GCGCAGTTGCATATAACTTTGGTTTTTCTTAACCGATCTTTATGAAATTTTCTACAGTACTTCTTATCGTAC  
CATTGGATATTTGTGTATTCTAAAAGTCAATTGCATTTAAATTGTGGTTTTAAATTGGTTGGCAATAAAAGT  
TGGGTATTAAACATGATTTATAGCTCTGTTGTGGTAGCGGGGAGGTGGCGATAGGTATGAAATGAAAGAT  
ACTTGAAATATCTATAATATTCTAGAAGCAACATATGATGTTTGGTGGCTCTAGCTCGTATTATATATCCA  
AATTTGCTGAAAAAAAACAGGATGTGCATATCGATTTTTATCGATTGCTTGAAACGGAGTAAGTTGTCTG  
ATTATCGGAAACAACTCGATCTGCGCGGGAAGTACAGCATCTACATCTAAAATTTTCACTCTCTAGCTCT  
TATAGGTTCTGAGATCCTCGAGCTCATACTGACGGACGGACGGACGGACGGGCGGACGGACGGACGGAC  
AGACGGACGGACATGGCTAGATCGACTCGGCTATTGATGCCGATCAAGAATATACATACTTTATGGGGTC  
GGAGATGCTTCCTTCTGCCCCGTTACATACGTTTGGATTTTGCACAAATACGATATACCCTTATACCTATTTT  
TAATGGGTTCAGGGTATAAAAAACAGAGACAACGCTTTAAGAATTTTCATCACAGGTCTTAACGGTTCTTTA  
TCAGAAAGTTTTGTTCTCCCTTAAACCTGAAAATTTGCCTAATGCTTTGGCAAAAGCTCAGGAACTGGAAGC  
GAATTACCAAAGGGGCTAACTTCGCTTACCACCATTTTCGCAAATACCCATCAACGTAACAATCTAAGCCCA  
GGGCATAACAATCAGCAAAAGAAAGCTGAATCCCCAAAACAACCTAATAAAAGATATGACAATCACTTA  
AGGTTCAATCAAGTTCCGCAAAATCAAATTTTTGCGCAAAAGCAACAAGACTCCTCAACCTCCACCGGAGC  
CCATGGATGTAGACAAATCCATACAACTACAGAATACACCTTATCCGTATCCCCAAAATCGAAATTCGGC  
TCAACCAAAGAAACGGGAATACGCTCCCCCTTCGGTTCAGCAACCTAACAACACTCATGCGTATCAATAAC  
CTCGAGGAAGACTATTTTTTAGAAGAAGAGGGGGAGAACTCCCCTACATTTTCAGAATAGACAAAAAAT  
AAATAAAATTTTAAAAATATTAATTGACACCGGTGCCACCGCTTGTTATATAAAAGAGGGTATATACGAT  
AACGCAGAAGAATTAGTTATAAAAAAAGAATTAAACTGTAAATGGCTACAGTATCATAACTCATTTTC  
ATAACATAAACATATTTGGCAAACGCCACAGATTTTATGAAATTAATAATCTAGACGCAGATCTATTAGTC  
GGTTATAATCTACTGAAGGAGATTAAGGCAGTAATCGACTTGTCAAAGGGAACCTTTGTTTTATAATAACA  
AAAAGGAAAATATTAATTTTACAAAACATGTCCAAGAAACGGTTGGCCATTTAAAAAGTTTACAGACGAAGC  
CTATAACGTTGCTTCGTATTTGAACTACCAAAGTGGGAAATGTAAATCATTTTCTTTATTTAATGTATCCGA  
TACAGAATCATCGTCTTTAAGTGACGCTGATAACCCACGTATCGAAAAAACTAAAGTTGACGATATTCTTA  
ATGAAGGAAAGCTAAAGAAATTAAACTCAAAAAGAGCAGACGTCGAAAGATGTCGGTATCCTCTACAA  
CAAGTTCTTCTTTATGCAAAATAAATCATTCATTAATGAAATGGATAATTTGAATATCCTTGAGCAACAA  
GTCGTTCAACAAATAGAAACAAAGCATTCTCAGATTCAAACATGTCTCCCTTTTAGAACAGATATTAGAG  
GAGAGATAAGAACATTAAACGAAAATGCAATTTACAGTAAACAATATCCTTATCCTCATTTCAGCTAACAA  
TTTTGTTAGTCAGGAAATAAACAGGATGTTAAATGAAAATATAATAAGGCCCAGCAGAAGTCCTTATAAT  
GCCCCGGTATGGGTAGTAGGGAAAAAAGGTTTTAATGAAGATGGAACGCCTAAGAATCGATTGGTAATA  
GATTTTAAGAACTGAATAACGATACAAATCCCCGATAGGTATCCAATGCCTGATCCTTCAGTCATTCTATC  
CAACCTAGGCAAAGCCAAAATGTTTTCGACAATTGACTTAGAATCGGGATTTCATCAGATTCTAATGAAA  
GAAGAAGACATCGAAAAAACAGCTTTTTCCATTAACAATGGAAAATATGAATTTCTTCGTTTGCCATTTGG  
GCTTGCGAACGCGCCAAGCATCTTTCAGAGAGCAATGGACAATATATTACGTGAAAAAATCGGAAAAACT  
TGTCACATTTATATGGACGACATAATAGTTTTTTCAAATACCCCGGAACAACATTTTGATGATTTACAAGA  
AATCATTGAAATTCTATTCAAAGCAAACATGAAAATATCCTTGGAATAAATCAAATTTCTTTAGAAAAGAA  
ATAGAATTTTTAGGATACATAGTATCATACAATATCATTAAACTGATCCGAAAAAATAGAATCAATCA  
TGAAATACCCTCCTCCTAATAATTTAAGGGAATTACGAGGTTTTCTTGGCTTAACAGGCTACTACAGGAAG  
TTTGTAAAAAAATACGCGACTATAGCAAAACCACTCACTAAATTGTTACAGGGACATAACGGTATGGTTT  
CAAAACATATGTCCAAAAAACAGAAATATCTCTAGACGAAGAAGCAATCTCTGCGTTTGAAAACCTAAA  
ATCACACTTGATTGCAAACATCGAACTAACTCAGCCAGATTATACAAAAAAGTTTCGTCCTCACCACAGAC  
GCTTCCGACATCGCCATAGGCGCCGTCTTTTCGCAGGAAAACAAACCAATCACCTTTGTTTCAAAAACCTT  
AAATAAAACAGAAAGAAATTACGCCACAAATGAAAGGGAATTATACGCCATTGTATGGGCATTAAAAAA  
CCTTAGGAACTACTTGTATGGTGTACAAATTTAGAAATCCAAACAGACCATCAACCACTTTCTTTTGCGG  
TTTCTGCACGAAACCCTAACTCAAAAATGAAAAGATGGCATGCTTTCGTAGAAGAATTTTCCCTAAAAT



ATTTTACAAACCAGGATCTACCAATGTCGTCGCTGACGCGTTATCAAGGGTAATGATCAATCATATTTCCA  
ATGAAAGTAATCTCGTGTCCGAAGAAGAACCGTCGTCCGATAATGAAACTATCCATTCAGCCGACAGTAG  
TTATAAAAGCGTAATTGAAGAAACACACAAACCATTGAACCAATTTAAACAACAATTACTTGTCTTCTAAA  
AACAAACATAACAATTTCATGAAAAATATGAAGTTTTCAACAAAACAAGACATAT  
>160\_rnd-1\_family-276\_\_LTR\_\_Gypsy  
GAGTAAATGGATGCGTTTTAACTTTAAATTGTTATAACTCTGTGATCTATAATTACAGAACAATGTAAATC  
CCAGTATAATTGTTTGGTTCGTGCGTAGTAGACTTTGGATATTTGATATACACGGAGAAATGTGCAGCGACA  
ATCCCGTTTACTGCTACACCGATTCAATTATACCCTTCTGTTGCGCTATGGAGTTATCACTACTTTTCATAAT  
AAGTCGTTACCTAGGCAACGGCTATTTCTTGGATCCTAATCTTTTTTTTTTATGAGGGAGCTTCTGGAGCCTT  
ACTGACGTGTGTTATACCAAGTGGATCAAACCTGTTGTCTTTTGCCTTTTTGATCTCGTACTGGTCACATCAT  
AAGATTAAGCCGGATCTCAACTCACTTGCCGCTTAATTATTAAATTTTTGTTTTCTCATCCCTATACCCTTC  
ATTGTATTAGTTGATCAGTTTTGAAGCTGATGCAGATTATAACCTTTCATGAAAACGACTGCATGGCATCA  
ACACATTTTTATGAAATATTGTTCTATATTTTCGATCTGTTAATCGATTTTGCACCTTTTTTTTTGTAAATTTTA  
ATTCTTGTTAGTATTTTTATTTTAAGCGTAGGTCAGAAATGTTAATACATCGCAGTTGCGAAAACCTTAGCAG  
CTGCTTCGATTAATAAGGAACTGCGCTATATTTGACTTAAAACGATTGAGTTTTCTACACAATTAGTAGCT  
ACCAGTCGCGAGCACACATTCCATCGTGCATGCTATAATATTAGAGTAGTAAAGAAAAAATATTTGCCCTG  
TTTGCAAAAACAACAATTTACCCGTCTAACCCATGTGTGGTAGATGACGCCCTCGCAAAGCAACCGACGAT  
AGTTACTATGCCAATTGGAACCCGAAGTCAAGGCCCCCCAGAAGAGATTTTGTCCCAAGGCACCATGTGCG  
AAGAATCCTCGTCCGCCAAGTGTTCCGCCTTTGGCAGCCGAGCCAGATGCATGCTCTCGTGTATCCCCCAC  
GAGAAGCGAAATACAGCAGTCAATTTCTGATTCAATGGCAGCAGCCACAGAAAGACAAACAGCCTCCCT  
GACCCAAACTTTACAGTCAGGATTCCAAAATCGTTTGTCTGCTTTTACAGCTCAACTAGGCAGCTCCACAG  
CTCAGCAACCAACTTTCGAACATGAGTATTGTGCGATCATCCTCAGCCCTGACCGGCTAATTCTATACGAAAC  
GAGTCTAGAACTAGGAGCTCTCCAATGTTAGAAAACCTTGCCTCCAGACCGACTTAGCCAAATAATCAGTA  
ACTGGAAACTTAGATTTTTCTGGTCGATCGGGCATGGGTATAGATGAGTTTATCTATCGCGTCGAGGCGTTA  
ACAGCCGAGACATTNGATGGAATAATGAGTTGTTGGCTCGTCATATAAGCCATCTATTTGAAGGCAGCG  
CTAACGATTTCTTCTGGCGCTACCATAAGAGTGTCCCTATTATCTTATGGTTCGGAATTATGTGTTGCTTTAC  
GTGCTCAGAAGAAGTTCAAAGAAGAGCGACTTGATGTTGACATACGTGCGGCAATTGATCGTTCGTAAACA  
AAAAGAGGGTGAGTCTTTCGATGACTTTTACGATGCAATTATTATATTGACCGACAAACTGTCTCTACCCT  
TATCGAATTCCTCCTTGCTAGAAATCGTTGCGCTCTAATTTGCTGCTAGAAATTCAGCACGAGCTTCTTTATG  
AGCCCATACATTCTATCGCGCAACTTAGACATTTAGTGCAAAGGCGGGAAGGTTTTATTTCAGTCAATTTCT  
AAAGCTCGAGTGTTTGCACCCCGCCCTGCGCCTCGTCCCTCATTGCACGCTATAGAAGTACAAACTGAAA  
GCGAAGCAGAGTCCGATGCGATAGACCTTCTCGATAATGATGTATCAGCCATCAGTCTAGTCTGCTGGAA  
CCATCGGTATCAAGATTGTGTGCGCCGAACGCAAAGTGTTTTTCTATGGCTGTGGTCAGACAAACACTTACA  
AGCCAACTTGTACCAAGTGTAACAATGTGCTAAAAAACTACCTGTCTCGTGTACCATTGACCGGTACACG  
CAAACCAGTTGCATCCAAGGCAACAAATACCGACTAGAGGGAGAATTAGAATCCTCTAATCAATCTTTAC  
CTGACTTTTCATTTAACCAGAAATTTACCTTATATACTCGTTTACAATCTCAATCTGTTAATAAAAAATACTT  
CTGTAAATCGCAAGATATTACGAGCGCGATTACGTCGAATAAATTTCTTTAAGCGATGTAAGATCGAGAA  
ACAAGCTCTCGAGTCAGCGATCGTGTGTACCGATTCAAGCCCTTACGCTGAAGTAACCGTATTGGGAAAA  
ACTGTTACAGGATTATTGGATACCGGTGCGTCGAAAAGTTGTTTTGGTGGTAGTTTCGCTGTGGAATTGTT  
GAATACAAAAGTACTGTATAAAACCGATTACTTTCACAGGTGAAAACCGCCCATGGAAAAAACTCAATAAAT  
ATTGAAACGGTTACGCACAGAAATTTATTATGGTGGAAAGGTTAAACGAATTACTTTTTATATAGTCCCTT  
CTCTTATTCAACCGCTTTATTTGGGCATAGACCTTTGGTCAACGTTTGAGCTGTTGCCTCCTTGCTTGTTAA  
GGCCATTGGAGGATTTCGCTGCGAGCTTTAACTGCACACCAACAGCAACGTCTTGCAGAAAGTGTGAAGCT  
ATTTCTTTCATTCGCGGAAAAAGAGTTAGGAAAAACCATCTAACTGTCTCATGTATAGATGTAGGTAAC  
GCAATTACTATCAAACAACGACACTATCCGTATCTCCTGCAAGGGAGAAATTAATGTTCAAAAGAAATT  
GATCGTATGCTTTCCCTTGCGGTTATTGAACAATCGGGAGAGTTCTTGGTCTTCCCCAGTAGTGCTCGTTTG  
TAAACCAGGAAAGGTTTCGTCTCTGTATTGATTGCAGAAAAGTTAACGAGGTTACTCGAAAGGATGCTTAT  
CCGATGCCCTAATTGATGGAATTATTAGTCGTCTTCCTAAGGCTGAATATATTACCAGTCTCGACTTAAA  
AGACGCTTATTGGCAGATACCTTTAGAACCCAGTTCTCGTGACAAAACAGCGTTTGTAGTACCAGGTAGA  
CCCCTTTACCAATACACGGTAATGCCATTTGGTTTTGTCTAACGCCCTTGCTACGATGTCCAAATTGATGGA  
CAGGATAATTCCAGCTTACTTAAGAAATGAAGTGTTTATATATTTAGATGATCTTCTTATAGTGTCTGATA  
CATTCGACCGTCATCTTGCCGTGTTAAGTGAAGTAGCCGGGAAAAATAAAGGATGCCGGGTTGACAATTA  
ACCTTGAAAAAAAGCAAGTTTCGTCTAAAGGAAGTTAATTATCATGGTCATGTTGTTGGTCAGGGTATTAT  
TCGGATGAATGCTGATAAGATAACTGCCATTACCGAATATCCAGCGCCTCGCTCGCTTAAACAATTGCGTC

GCTTTCTCGGTATGACTGGGTGGTACCATAAGTTCATTTCGAAATTACACTTCTATAGTTTTCGCCATTGACTG  
ACGCCCTGACAAATCGAAAAAAGTTTGAATGGTCAGAAGCGGCAGAGCAAGCTTTCAGGCGCTTAAAA  
CTGAAATGTGCAAGGCCCTGTGTGCATACACCTAACTTTGAAGCTTCCTTCTACATACATTGTGATGCTA  
GTCACACTGGTGTGGGTGGTGTCTCGTCCAAATTAATGATACAGGTGACGAGGTCCCATAGCATTATG  
TCGCGAAAGTTGAACAAGTGCCAACGTAATTATTCAGTTACGGAGAAGGAATGTCTAGCAGCAATTTTAA  
GCATCGCAAGTTTCGAGCTTACGTCTGAAGGCCATCCGTTTACTGGTATTACCGACCACGCATCCCTTAAAT  
GGCTCATGAATCAAGCAGATCTCAGTAGTCGTCTAGCTCGATGGGCTCTCAAGCTTCAAGGATATACATTT  
TCTATACAACATCGGAAGGGCAGTAAGAATATTGTACCAGATGCTTTATCCCGTACTCACACGGAGGATT  
TATCGGCTTTAGATGTGATGACTTTATTGATATGCAGTCTCCATATTTTAAATCCCAGGGTTATGAGTTGT  
TGAAGTCTAAAGTTTTTGAGAATCAGACTCAAATGCCGGACGTCAAAGTTATCGATGGCTTTATTTATCGA  
AGGTCCGAGCATGCCTCAGGAGACAGAGTTGCGGATAACATGGTTTGAAAATTATGGCTACCCAAAGAGT  
TGGTTCCCATGCTTTGAAATTAGCTCATGATGATCCCTTAGCGTCGCATTGTGGAATGAATAAGACACTA  
GAGAGATTACGACGATATTATTATTGGCCAAATTTAGTTTCAGACGTGAAAGAGTATATTAATAAATGTG  
AAATTTGCAAAGCGACTAAACATCCGAATCGTGTCTTGAGACTCATCGATTCTTTCAAAAATTGTATGTTG  
ATTGTCTTGACCGCATCCCCGTTCCAAGGCTGGTCATATTGGCATATTCATTGTGCTCGACCATTTTACA  
AAGTTTCCTTTTTTGAAACCTGTTGCAAATTGACCGCAGATGCTATTCTACCGTTTTTGGAACAAGAGTT  
GTTTCACTGCTGTTCAATGGTGTTCATTTAAATCACAATGTTTAAACGATTTACTTCGAAAGTATTCGATA  
CTCCACTCGGTTGATCCCGCTTGCTACTTCTAGAACGTACGAATAAGCAATAGAGTCTTAACCAGCGCTCA  
CAATGGACGTCTGAACCGATTTTCGGACAAGTTATAGCCCGTCGAAAATCGATTGATGTGTGAAATATATGA  
CGAACTGCAGATTTGCGTTTCCGATCCCCAGACTTTTTTCTATTCAAATATTAGTTTATTTTCAAATCTTAT  
TTGAGAAAATAACCTCTGACCCAGAATCTAACAGAGTCCTACCCAACTGGTAGCAAGCGGACAGATCCA  
TGACACGAGTCCCCAGTGCTGCCAATATGACTGGACAATGTGGGGCCATTCATTTCTCTTGTTCCTCGGG  
ATCGACCAGAAAACGACAGCTCAGCTAAAAGGTGCCTAAACGCCTGCTGAGAGCAGTCTCGAAGTCGAA  
CTATCAAAGAACGAAAAAAGCCAATTGCCAACTGCCTTTGGCTCCAAATTCCTCTATATTAATAAGGT  
ATTGACCAAATTTTCAAAAATCTGATAAAAGTTTTTATGTTGGTCATCAATTTTCATATAACTTTGCCAAT  
ATCAGTTTAAATATCTTCTTGATACCTTGGTCCAGCCATGGTCATTAATTGTGTCGTTGTGTTGATGCAAT  
GACTCTTTAAATCTGCTCTAGACGCATACGAAGGGTAAATTACGTCCGAAGGTACCAGCAATATAACGAA  
TCAAAATTTCTCAGCCTATAGGGGATAAATATTGCATGTACAACTTTTATAATACCCAGAATATCAAACAC  
ATTTTATGTGGGAAGTAGACAATTCGCTTTGTTAGTAATGACACCTTTTGCATAGTAGAGCTTTCATCTTC  
TTGCAGGTATATTTAAATTAGTCCAATTGTGCAATTGTGACAGATAATTA AAAACTTAAGAATGAAGCAA  
TACACTGAAACAAATAGTTATGTATATTTTAGATTACCGTTGTTACATTCTCAGAAATAAAACCATAGATC  
TAAGCACATTGCAGTGTACAAATAAACTATGAATTAGAAGAAATTCTGCACGACTACAGCGTCCTGAAA  
TCTCATGTAGTTTTTCACATGGTATTTGGTACAGTGGGGATTTCTAGTTCAATTTGCTGAACAAGTTTACTC  
GTTCATTTTCTGGCCGAGAACTAAATCTGTCATTAAGTTCACTCGTTCAGTTATTCAGTCGGTTATGAACG  
ATGAATTCTGCTCAGTAATTCAGTCGGTCATGAACTATTAGCTTAGTTTCAAGTTTTCAGTTGCAAAATATATGTTATACTTTTTACTTATTATAG  
GATTATATTTCTGTTTCAAGTTTTCAGTTGCAAAATATATGTTATACTTTTTACTTATTATAG  
TGTACCATTGATAATAGATACAAATCAAAGGTGAAATTA AAAATCCCGCTATCTTTTATTTATTTTATT  
TAGTACTGAACATCTCATAAGAATGTATCGTTCAGGAACGGCTGAACTGCTGAGTTGCAT

>160\_rnd-1\_family-253\_\_LTR\_\_Gypsy

CCGAGAAGGAATGCCTAGCCGCCAACTGGCCATACATCGATTCCGACCGTACGTGGAGATGATGCCGTT  
CACGGTAATCACCGATCATGCGAGCCTGCAGTGGCTTATGAGTCTCAAAGACTTGAGCGGGAGATTAGCC  
AGTTGGTCCCTAGAACTGCAAGCGTTCCCTTTCTCCATGCAGTACCGCAAGGGAGCCGACAACGTCGTCG  
CAGACACGTTGTCCCGAAGCGTGGAAGAGGTGCAACTGACCCCGGAGGATCTGTTGGGATTTTCAGACCCC  
GGAGGATCTGTTGGGATTTTCAGACCCCGGAGTTCGAGAGCACCGAATATCGAGAGCTGATAAAAGAGGT  
GATGAGCCAACAAGGGAAGTTGCCGGATCTTAGAGTGCAGGACGGACTTCTGTTCAAGAGGACCGTGAA  
CGAGAGCTTGGAGGATGAGGTCTGAAGGCACAAGTTGGAAGCTCTGGGTGCCGGAGTCGCTGACTGCAGG  
ACTCATCCAACAAGCACACGCGGACGAGACGTGAGTCTGAGTCTGACGCGCTGCGCAGGCGATATT  
ATTGGCCCGACATGGCCATACAAGTCAGGGACTATGTACGGAAATGCGATACATGCAAGGAGACCAAGG  
CACAAAATAACCGGATGCAGGTCTGGAATTGGGGAAGAAGTGCGCACCGACCGCCCCCTTCAGAAGCTAT  
ATATCGACTTCTGGGAAAGTATCCACGGTCGAAACGAGGGCACGCGTGGATATTTCGTCGTCGTAGACCAC  
TTCTCGAAATTTACCTTCCTGAAGGCCATGAGGGNAGCCACCGCGGCGGATGTGCTGAACTTCCTAGTGC  
ACGAGGTGTTCTTCAANTTTGGCGTGCCGGAAGTGATCCATTCGGATAATGGACGACAATTCGTGTCAA  
GTCGTTTCGATGCGATGGTCCAGGCGTTTGGCATTACTCACCTGCGCACACCAGTGTATTCGCCTCAGAGCA  
ACGCCGCCGAACGCGTGAGCCGCACAGTGCTGTCTGCAATCAGAACCTACCTNNGGTCGGGATCATCGGGA

TTGGGACGCGTACCTACCGGAGGTGGAAGTGGCGATCCGGAATGCGGTCCACAGCGCTACGGGAGTGACT  
CCGTTCTTCGCGGTCTTCGGACAGCAGATGTACCTGAACGGTTCCAGTTACAAACTGGCCAGGAAGCTGA  
GATCNTTGGCCGATCACGGTATTTCTGACCTTGACGCGAAGGACAGACTGGCCGTAATCCGAAGCCGAGT  
CAAGGACCANCTGCACACCGCATACGAGCGAAGTCGCCGACGATACGACCACCGCGCGCGCCAGCTCCA  
TCCGGAACCGGGACAGGAAGTGTGGAGGCGCAACTTCGCGCTAAGCAGCTTCGGCAAAGCCTTCAACGCC  
AAGTTCGCCCGGAAATTCCTGAAGAGCCGAGTCGTCCGAGCCGTGGGCACCAACGCCTNCGAGTTAGAAG  
ATCTCCAGGGACGCGCGCTAGGCGTCTTCCACGCAAAGATATACGAACGTAATCGTAATTTGCTCACCT  
CCCTACCAGGCAATGGCGGCGGCAACGCCCGTCCTCCCTTTTTTCTTTTGGGTCAGTGCGAAAATATAGAT  
TACTTGTCGTGGGTGTGGCCTACGTTGGGCGTCGTTATTAGCCGGCTGGGTCAATCCATGAAATGCGCACG  
CAGATTCCTTGTAACGGTCGTTTCGCGTCGTTACAATAATCTGCGTGGTGATGTTGCATTTGACGTTATCGG  
CGGCACCGAGGGTTTACTTAGTTGGTTGCGTGCGATATTATCGGCCACGCCGATATCTTTTTGTCATATGG  
TCAGAGTATGCGGGGTGAAGCTGGGCCCCACGGCGGAGCCCAAATTTTTGAAGGGTGGCAACGCCAGACTT  
GCGATCCACGGCGCCAAAAGCGACGATTGCTATTGGCCGCCCGGTTTCGCTCCCAAAGAGAATANGAGGA  
GAGTGGATCGCATGCCCTTGATATGCCCTTGGCCGTCAATTTGGGCCGTGACCAAAAAAAAAATGCAGCTG  
TGCAGATGGGCAGCAACGGTGCCCGCCTCGCCAATGTATGCGTGTGCCGAAATTCGGCACCGATGATGTT  
GCTGCCCAAATGTACGGGGAGTTCGACTTTGTTCAGCGGTCCACAGCGGACGTACCGGCTCGCAGTTAAAA  
ATTTTTGAAGTTGGATATTTTTTTTTTGGCCGCCACGGAGCATGTGCTTAACCAAAAAAAAAAAGAAAAAAT  
CAAAGGGCATACTTTGTTTCATGACGGGCTTTCTTTATTATTTAATTGCCAAGATAATTCCTTATGTGCTAA  
CGTATTGCAAAAGAAAATAGTGCACAAGAGCGATAATACACGAAACAATAACACCAGAAACACACTG  
TCGTCAATTTAAAACCACTATAAAAGCGATACTCTATTAGAGCAGCCGCAGCCATTTCGGTGGCACACNACG  
CTTGAATCCGCGCCGGAGGACGCTGGCCAGATCAACCCAGATATTCACGGGGCCGGATTTTCAAAGCGCGG  
CCAAGTGTGCGCGTAACACGCGACGGAGAGACGAGCCATCACGGACGGGACTCACACGACGAAGAGGC  
GGCCACGGGCGAGACCACGCCCATATCATCCGAGTGAGTCTGTTCCATTTTCGTGCCTCCTCGCCTGAGTAA  
ACGGCAGAGTCAGACGCAGACTTCCCATTGTTGCTCCCTGAAAGAGAACCGATTTTTTTTTTGGTATTAAAT  
ACATAAAAATACTCACGACTAGTTTAAATTAAGTAAATTTCCGAAAGTGCGAACC GGGAAGGAAAGGGC  
CCAAAGATTATTGCGTCTGCCAAGTAAAGAATGAAGTTAAAAAGTTTAGATTTTGGTCAACTTATGCACG  
AGTGATACCCACTTATACGTATATATATATATGTTACGCACCTCAGGTGCAGGTGCCCCCACCAGAGAG  
CTCTTTAGGCAGGCAAGGTAATATAAGCGCTTTGACAAACAACGCCTTTTCGTTGGAAACACATATGTATA  
CACGCATTTATTTTAGCGGGTACTTGCTCCCCATTGGTGCAATAATTACCTGTGTTTATATTTCTCCCCTTG  
TTTTCTTTCTTTTGTGACTGGCAATAACTTCTGGCCGTTTTTTTTTTGGTCTCCGGTATTGTATGAAGGTG  
CCAACAAAAAAAAAGATATTCTGTACAAAAAAAAAAGAAATTTAATATATTTAAGATTAATAGAAATTGTTA  
TAAATATGAAATGATGCAACGCGTTATAGATAACTGTTGAAGCGAAGTTGAAAGATGGAAAAAAAAATTGA  
AATTTAAACTTATATCCATTATTCTAAATATAAGAATATACCAACTTATCGTATGCACCTGGTTTAAAT  
GCCGGAAATGTTTCGCGAGTACGAAATTATAAATAACGGCTTGAAGATAACCTGCAGGGGAATAAGAAAT  
AAGATTAAATGTTAATAACGATAAGAAATGCAACCAATTATATGCCGTATCTGAAGAGAGAAATGTCCGG  
CTAAATTTTCTTTGATGGGGAGAGTTGGCATAACAGCCGGCACAGGCTGATGGCCATCTAATGGCGAAAN  
GNGGGAGACGAGTGTAGGTGATCGTCTCATGGTNGGGCGGGTACGCTGGGTCCGGAACCGGGGNCCGAT  
CTGGAAGAGTAAGGTGGATAAATAGTGTTTTTTGTTAATTTATATTGAGTGTCTCACCTTTGTTGTTTACAT  
GTTTCATAGTTGTTACAGCTGTTTATTTTGTTCATGAGTTAGAAGTTCGATTGTTTGACGTTATCGATTTGT  
GGTTCGCTTTGCATAGTGTTGTGTAAGTCTGTTTTGCTACAGACGTGTAGCTTCGTTGTTATCGATTGTGCG  
GACTGCGGGCCAGGGATGGGACTACACCCAGAGAAACCGATGAGCCAGCCGGCGCGGCCACCAGAGAAA  
CAAGCAGTTCGGTAACAATATGGCGCCCAATTTGAAGAAGCACTCGGCTTCTTTGAAGTCGGTGCGTAAT  
CAAAGAAAAATAAATACGATATAAATGAAGGTACAGAGAAAAGGATTCCTTTGGCTTCAGGACCCACAC  
CGCTGAAGTCTTATGTGGCACGAGTAGGTAGCTCATAATCGCGCAGCGTGTAGTGGAATCCGAGAAGCAC  
GACGGAAGTAGAGAATATCCATAAACATGAGAAGTTTTCTTGTAAGTGGTTGATGACGGTAAGTCACGTT  
GCATGTTGGCGAAACGTTTCGCGACCGTTTATCGTAGCCTGGTGGTAGCCGCCACGACAAAATAACTTGTG  
ATAGAATGTGATATTAGGGTAGGTCTTACTAGAGTTTGTTTAATGTTTTCTATTTGTTTTGTCCCCTCTGT  
GCTAACGTTTGGGGTGTGCTGGCCGTAGTTAAATGAGCTTCGGAGACAGGTGACCCAGGACGATATAAAG  
CCGATCCTGCGCCGCACCTGTACACAGCATAACCCTAAGGGTGCCAGAAAGTGCGACAGAAACCAAATAG  
CCTTCAAGGTAGCGTTCCTTGAATGCCGTTTCGTCAGTCAAACCTGACGAACTGAGCATTGACGAATGCTTA  
AGTGTTGTCCACTGTCCAGATTATGCGTAGATTAGTTAGCCTGTGTTAGGATTTGTCTTCTCTCCCCAAGT  
ATTTGAAATTAATTAGAAAGAAAATTAGTAAGATTTGTTAGTGGGTGTTTATTTATTTATTAATTTATTAG  
GAATATTGGTAAAGTTTTTTTTTATATANGGGTAGTAAGCCTTGTAAGAAGAGAGGGGTACAGTTCTCAGA  
AGGGATAAGTATGGCTGAGGAACAGGTGTCTGATTGGGCTTCTGACGCTGACGGGGCGTCGGCTCTGCTA

CCGCCGCGCCCGGCTGGGGCGCTGGTGCGAACGCCAATGAATTTCCGGGGATTTCAGAGAGACAGATCC  
CGGAAGAGGGTCACCTGGTAGACTTGGAGAAAGAATTGGCGCAACAAGATAAACCTCCACGGAACCTGG  
AGTTCCCAAAGCCCCGAAAGACTCAGTGCTCAAATCGGCGGCAAACGCGGGCGATCGCTCAGGCCCCACCA  
AACGTATCGGCATGCTCTGCCATCTGGCATCAGCGAGTCCATCCGCGAGGAGATGCGAGCTGGCTTCATG  
GAAATGATGAAGGGCATCATTGATATGATCAGGCCGCCAGGGAGCCAAGCCGCCGAGACTAACACTGCG  
CCGAAGCCGCCGAGACATGCCGAGCCGGGACCACGAACAGGCGCCATCCCGAAAGAACGGGAAGTGTTT  
CAGCGCGAGGCATTTCCACCACCGGTGCCACCGAAGCCACATAGACAAGGCGCACGAGGGGGCGGAGTAT  
TCGTCCAGCAGCCAGTTTACGTTGCAGATGCTCAGTCGAGGAACTGGCGTAACCCGAATAACCGCCATT  
TCCGAGTAGAGGACCGGAGAGCGGATGATTTTCAACCGGAGGAGGCGTACGCCAACGTACGAGAAACGG  
CGTACATGAAGCTCGAGCGGTGGAACGTCAAGTTCGGCGAGGACGCGATGAATTCGGTCGAGGACTTCGT  
GTTCCGCCTGGAGTTCCTGCAGAGGCAGTATCAATGCCCCTGGAAGGAGGTCCTGCGCGGTTTCCATCTGC  
TCCTGACCGGCCGCGCCCCGCGAGTGGTATTGGATGCACGTGCGGCATTCTAGGGTCGACAGCTGGATGCA  
ACTGCGGCATGCCCTCTTGACAGGTTCCGGGGCTACCAGACGGAACACGATGTGATGCAGGAGCTATTA  
CAACGAGAGCAACAGGCCAGCGAAGGGGTGGATGATTATATCCACCACGTGCGTCAACTCGCCGCGCGA  
TTCCAGAAGCCGCTGAGAGACCGCGAGCTGGTGAAGATTATAAAGCGCGGTTTGAAAGAAAGTCTGGCG  
AAATATATCTATGCCATGGACGTACTACCGTGGATGAGCTGCGCCAAGAGTGCCTAGAAGTGGAGAGGC  
ACATGGGTCGCAGAAGCCGGACGGGGTACCTGCCGCCGTCGCGTTGTCCACAAGGAACGAGGCCCCGTAGT  
CCACGAGGTTGAAGTACCACCACATCGTACAGAAACGCCGCCGGGAGAACTGGAGGAAGCATTCTGTGCG  
AGGCAGGAACATCCCGACCTGTATGCTGGAACCTGCAGACAGTTCGATCA

>160\_rnd-1\_family-41\_RC\_\_Helitron

TTCATATAGAACATTTATATGTTTTATTTCGTTAAAAGTTTTAGTCTATTCTTATAAACTTTTTGGGTCCTAT  
TTTTGTTATCTTAAATTAGAATGTTATCCCTATTTTCTATGTTAACTATTGTATATGGGCCTATATATTCTGG  
ATCCAATTTATGGCCAGTTTCGTTTCTTAATAAGACTTTGACTTCTATTTCTACTAGAAAATCTATAACTTT  
TCTATCAAAAAGTTCCTTACTTCTTGCTTATGTTTTCCAAGTATTATCCTAGACCTTTTATATGCTGNTTCTA  
ATCTAAACTTAACTTCTTTAGCATAATCTTCTACATTATATGGTGGGTCGATTCTATTTATATTGGTAAATT  
GGGTGTTTACCAAAAATTTGCTCATAATAATTGTGTGCGATGGAGGGGGTCGTGTTAAAACAGTATACGA  
TGTATTTGATCCATACGCCCCAATCAGTTTTATCAACTGATATATATGATCGTATGTATTTCGTTAAAAGTCC  
TGTGACTTCTTTCTACTGTTCCAACGTCTGGTGATGATGTGCAGTTGATGTTAAGTTGTTTATTTTCATAT  
ACTTGCACAAATTGTTTATAATTGAATTCTTATATTCCGTACCCATGTCCGTAATGAACGTCTTCATTGGAC  
CGTACTTCAGAATAAAAAGATTTCGAATATAGATTTAGCGACAGTGTTTGCAGTTGTATTTGGGATCGGAATT  
GCGACGAGGTATTTTCGTAAAATAACAAATGAGTGTAAGTGCATACTCGTTCCCATTTCTGTCTAGGTAA  
TGGAATAAATTGTGTCAACGATTACTCTGTGCAAAGCGGATATTGGTGTCTTCTGTTATTGTTAGAGGAGTT  
TTTGTGTTCTTTGTAGTTTTTTGCTTTCTGGCATTTTGGAAATTTGCGGATGTATTCTTTTATTTGTTTAGACA  
TACCTTTCCAAAAATAATGTCGTTTGACTTTGGCCAAGGTTTTTATAATGCCTGTCCTCCTAGTATGGGATC  
ATCAAGTAGTTTAGACAAGATAGCTTATTTTTATTTTTTTCAGAATTTATTTGGGTCACCGGGTGGAGTAGCG  
CAACTCTTAAAGATTTTAATATTTGAATGCCCATTTTCTATAAATTATCCATTGAAACGTGTTTACAGAGATAT  
TTTCCACGGNGCCACNTTGAGTTGGCTGATTTTATATATACCGGCTTGCGTTTCAAGCCTTTGAAAGATT  
GATCCAAATCAATGGTTTAATTAGTATATAAATCGGTAACATCGTATCTTGCTGTAATTTGTCTTCCATGTT  
TAAAAAACATGTCATATTGTTTACATGCAAGGTCCTACTTTTCGTACCTAGTCATTGTTAATGACTTGGT  
ACACTTTGGCCTTTGAAGCTTTTTCTATAGATTGCCTAGGCAATTCTATTTCTTTTCTCCTGCGCAGGATT  
CTTGTCTACGTGCTTGTCTTGTAGTGACTTTCATTATGTTTCCTGTTATATTTTGTAGCTCCTTGATGGTTAT  
TCTCGATAACGCATCTGCTACGTAAGTGTCTTACACTTCGGATATTCTACCGTAAAGGTATATTACTGCA  
AATCAAGCCTCATACGTGTTAATTGTGAAGTGGATTGACCATTGAAAATAGATGTTAGTGGTCTGTGATC  
CGTTTTTACCGTGAAATGGTTACCATAAATATATGGTCGAAAGTGTGTTATTACCCAGTGAATAGCTGTTA  
ATTCTTGTTTCAAGTTGTAAGTCTTGTACTTTCTCCTTCAGTAAAGGATCTTGATGCGTATGCAATTGGAAGTT  
GGAGTCCAGTAAAGTTTTAAGTTAAAAGTGTCTCCACACGCTTGTCTCACTTGCATCTGTTATTATGCAGAAT  
TCTTTGGTGAAGTCTGGATATTGTAACAAGGTTAGGTTTATTAGTGCTGTTTTGAGATGTTCTGGCATTTCAG  
GCGTCCATTTCGAATTTTACGTCTTTTTTACATAATCTTGTTATGTGACGTGAATAGTTAGCGAAGTTCTTTA  
TAAAGCGCGTATAGTAATTACAAAATGCAACGAATCGTCTTGCGCTGTCCACATCGTGTGGGAGTGGGTA  
ATTTTTAATCACGTCGTATTTTTTGTGCTCTGGCAAGATTCCCTTATCAGTGCATTTGTGTCCCAAAAATGT  
GACTTCATGCATAAAAAATGAACATTTTTCCGGATGTAGTTTTCAGGTTGAGTTTCTTACATTGGTCGAAAA  
CATCAGTTAAGTTTTTGACCATATGTTTCTTGGAACAAGCGATTACTATTAGATCATCCATNTTAAGAAAT  
GCTTGTGATGGTTGTAGACCAGAAAATGCTATTTTTAATCCAAATGGTAATCGCGTGAAGCGATATGAGC  
CATNGCTTGTTGACAATTACGTTATATTTCTAGAACTTTTTTCAAGNTCAATTTGGTGGGAAGCCACACATT





TGGAGCTATGCGACTCAGCCGAATACGATCCTTGGGGCAAGGCGTACAAAACCTGTCGTTAAAAGACTCTA  
CGCCGGCAAACAAGCGCGGCCTTCCGACCCAAGTGAGCTGAAGTCGATTGTGGAAACGCTATTCCCAATC  
AGACCCGACGTATTACACACGCGAGCCATACCATCGAGCCACGTAGCAGCCATGCCGTCCCTCATCGACG  
AAGTCTCAGTCGAAGAGGTGCTGACGATCGCCAGAAGCCTAAAGCCCAGTAAGGCACCGGGTCCGGACG  
GAATCCCCAACCGAGCACTGAAACTAGCCATGTCTTGCGGGCCCGCGCAGTTTCGTGCAGCTTTTCAACAC  
GTGCCTAATGGAGAGAACTTTCCCCACAATATGGAAACTCCAAACGCTAGTTTTATTACCGAAGCCTGGT  
AAGCCGCCCCGACGACCCATCGTCATACAGGCCGATTTGCCTCCTGGACACGTTAGGCCAAAGTGCTGGAGA  
AGCTAATCTGCAACAGGCTTCAGGTAGCTGTGACACAACAATGGTGGCCTGTCCCAAAGCCAATTTGGTTTC  
ACCAAGGCAAAGTCTACAATAGACGCTCTGGAGAAAGCGGTTCGGCATAGCAACAAACGCCATCCAAGGA  
TCGAGATGGAAAAGCGGCACAAAAAAGTACTGCCTCATCGTCACGCTGGATGTTAAAAACGCCTTTAACA  
CAGCCAGGTGGGACAAAATATTGGATGCGTTGTCAACGTTCCGCGTCCCATATTATCTTCAGGAGACGAT  
ACGCAGCTACTTCACTGGAAGACTGCTGCAATACGACACCGCAGACGGCCCCACTACACATCAAGTGTCC  
GCTGGAGTGCCCCAAGGCTCAGTTCTAGGACCCCTCCTCTGGAACATCATGTACGATGGCATCCTCCGACT  
GGAACCTCCCGATCGATACAAGTATCGTCGGCTTCGCGGACGACGCTGGCCCTTGTAGTCGTGCGCAAGGAA  
TTGAAGGACGTAGAGGAATCGTGCAACCACAGTATTGACCGTGTGCACCAATGGCTGGCAGCAGCTGGAC  
TCGAGCTGGCTGCTCACAAAACAGAAGCGGTGTTAGTCAGCAGTCGAAAAAGAGTGGAACACAGCGCACA  
TAAGAGTCGGCAGTGCGACAATAGAATCAGCAAGGGCGCTAAAGTACCTGGGTGTCATGCTAGACACAA  
GAATGTCGTTCAAAGAGCACTTGGAGTACGTGCACAAGAAAGCAGCAGAGTCCTGTGCGAGCGCTATCCAG  
GATTATGCTGAACACACGGGGACCGAAACAGCAGAGACGCCGTCTCCTTATGACCGTAAACCGAGCGGTA  
ATAATGTACGCGTCCCCCATCTGGAGCAGAGCTATGGCTGTTCCAGCTACAGCCGGGGCGGTACACTCTAT  
ATATCGCCTAAGCGCTCTACGGGTCAGCTGCGCATTCCGGACGGTATCGGACGAAGCGGCGCTGGTTATC  
GCAGGAATGGTCCCGCTAAGCGAACTGGCAACAGAAGCTGTAGTTTGCTATAGAGCCCACGATGGAAGC  
AACACAGCAAACCTCGATTTCGCACTGAGGCAAGGATGCAGAGCGTAGCACGATGGCAAGCACGCTGGGAT  
CGCGCATCTAAAGGACGCTGGACGCATAGGCTTATCCCAAACCTTGGAAGCCTGGACAAATCGCAAGTATG  
GCAATACTAATTTTTATTTAACGCAGCTCCTATCAGGCCACGGATGCTTCAGGAGCTACTTAAAGCGATTC  
GGCCACGACAACACAGACGAGTGTTCTTGGTGCGGCAGAGGAATCATAGAGGACGCCAATCACGTCATAT  
TCGAGTGTGGACGTTTCGCAGCGAACAGACAGGAACCTGGAGGACATCATGGGCAGACCTATCACGGTGG  
ACAACCTGGTCACGAGCATGATAGAGACCGCACAAAAGTGGGACGCTGCCAGCACCTTCGCAGCAGAAG  
TAATGCGAGAACTCAGGAGAGTTGAGCGCAGCAGACGGAGAACCGCGGATATTTAGGTAGCAAGAACAT  
GCCTGTGAAGCAATGCTTCGCGGCCGTTCCGCAGGCAATCCACGCTACCTAAACAATACCCACCTATAA  
CCTAAGATAAATAACTAAGGATAAATAAATAAACTGAATACAAAAAATAAATAAATAAATAAATAAATAAATAA  
ACACACACACACACACACACACACACACACACACACACACACACACACACACACACACACACACACACACAC  
CACACACACACACA

>160\_rnd-1\_family-53\_\_LTR\_\_Gypsy

ACAATGATAAGCGACAAAATAAAATAAAATAAAATGAAATTTCAAGAAATATATATATATTCTTATT  
ACCAGAAATGCCTATTAATAAGTTTGCGATAGAAGTATATTTAGAAGCAATATATAATAGCGACGCAGAC  
TTTAGAATTCGTGCATTGAATATTCTACAACAATAAGATAAAAGGCATAATTTTAAATACACTGCCATATG  
TTGGCATTAAAGAAATAGTGGTCCAGTGGACGGCGAGTGCCCAATTATAATGGTAAAACCTTCATAAATAG  
AGAACTATGGAATGGAGTGAATTAGCGAAAAAATAAATAATTTCAAAGATAAATTCGAAAAATCTTATA  
AGTGTGTTAATAAGAACGCACCTATAAGGGTTGAAACGCTAATTCACCACATAAACATATTAGTGCTAAA  
CTATAATAACATAGTTCAACTTTATTTAAGTAAAGAAAAATAGGCTTACAGAGCAGCATGTAAATCAATGT  
AAGAAAATAATCAAATCACTTGGGACTAGAATATCGAATATCAGCACTAGGCACAACATAGTAATAGATA  
TCCCAACAGATTTAAAATTAATGGCAACTTTTGAACCAGATCAACTAGAAGAACTGAATGAGTCTAAGCC  
AACACTAAATAGTGACCCTGATATTGAAGCTGATAGCGACATTGANCCACTTGAATTAACAGAACCAAAC  
ATGGCAGTAAATCAAGTGGCCTTAGACCGCGAATATGTAAGACAGGTATCGTCTACAGTCCCGGAATTTG  
ACGGCGAAAAGCTGTCACTGGCCAGATTTCTAACGGCTTTAAGACTTGTCGAACGTACTAAAGGTACACG  
AGAAGACTTAGCCGTAGAAGTCATAAAATCNAAAATAATTGGCCCAATCCTGTACAAAGTACAAAATGA  
AACCNCNATTANCGGNATTATNAATAAATTAANACCAGATGTCAAAGGCGAGTCAACCGACGTCATCAA  
GGCNAAGTTGCTTAACATAAAGCAGAAAGGCAAGNCAGCCNCGCAATNTACAGCTGAAATTGACAGTTT  
GCGTAAGCAACTNGAAGCAGCCTATATTGACGATGGACTAGATTCTGATAACGCAGAGAAATTTNCTACT  
AAAGAAACAATATCTGCNATGACAAAGAATCGCGAATACGAAAAGCTCCGCATAATATTAGAAGCTGGC  
AATTTTCAGCANTTTTCGATGATGCCATGAGTAAATATATCCAGTGCAGCACTGAAATGACTGGAAGCGCGA  
GTACAGTATTGTACTACAAAGGCAAAAACCTATCGCGGNAATNACAGCCGTAACAACCAAGAGGGTAGAG  
GCAATGGCCGCGGCAATAGTAACTTCCAANATAANGGNAATAACAACGACAGGGGTAATTNCAGAGGNA

ATGACCGTGGTGGCAACCGAGGAAGAAACAATTCCAACCGAGGTAACAACCAAAATAATAACAATAGAG  
GTAATGTCCGAGTAACTCAAGGTAATTCGGAAAACCAACGAGACCCCTCAGATGTTTCAGAGCCAATAAAT  
GGCGCAATAAAAACCATCAACCTTAATCTCAGCATATTTGTAAAAATTAACAATGAAAGAACAGGTAAAT  
CANTTGCAGTGTAGTAGATACTGGTGCAGATATATCCATATTAAGAAAATNCAGATATATTCGAAAA  
CGTAAACGAAAGAATTACTACCCAAATATCGGGNATTGGCGAAGGNATAATTCGTTCAAAAAGGCTTGGCC  
TTTATAGAACTCACTACAGGTAAATACATAATTCCGCATAACTTTTCATTTAGTCGATCAAAAANTTCCCAAT  
ACCTAGTGATGGCATACTAGGCATAGATTTTCATAAAACAATATAATTGCCAATTAGATTTTCACTCAAAGTG  
GCGACTCACTNATTCTTCGCCCAAACAACCTTAAATTATCCGATTNAATTACAAATACTTCATACTTGTGAC  
AATAATGCCACAGTACTCCCAGCTCGTTCCGAAGTTGTCNGTGAAATACAAATACCCTCAATAAAAAATC  
AAATTCTNATATTAAATCAAGAAATTGATGAAGGAATTTATATCGCAAACACNATATCCAACCACAAAAA  
TACATATGTCCGATTCTAAATACAACAAATACCGATAAGATAGTGAANTTAAATAAAAATAAAATATGAAA  
CTTCGAATTACGACATAGTAAAAGAAACCAACGAAGAAAGAGACAACCTTCGTTATGGATAAATTAATCAA  
AACTTTCCGCCTTTATTCAAAAAGTCAATTAAAAGATTTATGCACCAGGTATACCGACATATTCGGACTAG  
AAACCGAATCGATAACAACNAATAATTTTTACAAGCAAAAAGCTTAGATTGAAGGATGATGAGCCCGTATA  
CATAAAAAATTATAGAAGTCCTCACAGCCAAGTACAAGAAATTCAAGCCCAAGTACAAAAATTAATAGA  
CGATAAAATAGTCGAACCGTCAGTCTCANAATATAATAGCCCACTTTTATTAGTTCCGAAGAAGTCTCTTC  
CGGACTCTGACAAGAAAAAATGGCGATTAGTAATTGACTATCGTCAAATTAATAAAAAGCTATTGTCCGA  
TAAATTTCCGCTACCTAGAATTGATGATATTCTAGATCAACTAGGTAGAGCAAAAATATTTTTTCATGCCTAG  
ACTTAATGTCTGGCTTCCACCAAATTGAACTCGAAAAAAGTTCTAGAGATATAACGTCATTNTCAACAAG  
CAATGGCTCGTATCGCTTCACGCGATTACCATTTGGNTTAAAAATAGCCCCAACTCNTTTCAAAGAATGA  
TGACAATAGCATTTTCTGGTCTAGAACCATCNCAAGCNTTCCTTTATATGGATGATCTAATAGTAATCGGT  
TGTTCCGAGAAACATATGGTCAAAAACCTTAACCTGATGTTTTTCGACAAATGTAGGAACTCAACCTGAAAC  
TACATCCGGAATAATGTTTCAATTTTTCATGCATGAAGTCACATTTTGGGACACAAATGCACTGATAAGGGA  
ATCTTGCCAGACGACAAAAAATACGACGTCATNAAAAATTACCCAGTCCCACACGATGCGGACAGCGCN  
AGACGATTTCGTTGCATTTTGAATTACTATAGGCGCTTTATNAAAAACTTTGCCGACTATTCACGTCACAT  
AACAAGATTATGTAAAAAAGACGTAAAATTCTGAATGGACGTCNGAATGCTTCGAACATCTCAAAACGGC  
ACTAATAAACCCAACCTTGTTACAATATCCAGACTTCACCAAAGAATTCTGCATAATAACAGATGCAAGT  
AAGCAAGCGTGTGGAGCAGTTTTAACTCAAACTATAATGGACTCCAATTCCAATTGCATACGCATCAA  
GATCCTTTACTAAAGGAGAAAGTAACAAGAGTACAACCTGAACAAGAATTAGCAGCTATTCCTGGGCAAT  
AACACACTTTTCGACCATATATTTATGGTAACCATTTACCGGTNAAAACGGATCACAGACCACTAACATCTA  
TTTTCAATGGTCAATCCAAGTTCAAAATTAACACGTATGAGGCTTGAATTGGAGGAATATAACTTTACGGT  
AGAATATCTGAAGGGTAAAGACAATTACGTAGCNGATGCGTTATCGAGAATAACCATCAAGGAGCTACA  
AAANATAACAGGAAACATAATGAAAGTCACTACAAGACANGNAAGTAGACAAGAATCCTGCGCAGGAG  
AAAAAGAAATAGAATTGCCTAGGCAATCTATAGAAAAAGCTTCAAAGCCCAANGTGTACCAAGTCATTA  
ACAATGACGAGGTACGNAAAGTAGTGACCTTGCATGTAAACGATATGACATGTTTTTTTAAACATGGCAG  
GAAAATTACAGCAAGATACGATGTTAGCGATTTATATACTAATGGAACCATTGACTTAGGTCAANTCTTCC  
AAAGGCTTGAAACGCAAGCCGGTATATATAAAATCAGCCAACTCAAAGTGGCACCCGTGGGAAAATATCTT  
TGAACACGTTTCAATGGATAATTTCAAAAANATGGGCAATAAAATATTAATAATCATTAAAGAGTAGCGCTA  
CTCAACCCGGTGACCCAAATAAATAAAAAAGAAAAAGAGCTATATTGTCTANACTACATGATGATCCAA  
TACAAGGAGGTCATACAGGCATTACAAAAACCTTGGCCAAGGTCAAACGACATTATTTTTTGGAAAGGTAT  
GACTCGAGATATTACNGAGTACATCCGNAAATGTCCAAAATGCCAGAAAGCAAAAACTACAAAGAACAC  
AAAAACTCCTCTAACAATAACNGAAACACCAATATCCGCTTTTCGACAGAGTAATCGTNGACACAATTGGT  
CCGCTACCTAGATCAGAGAATGGGAACGAGTACGCAGTCACACTCATTTGTGATTTNACGAAATACCTNG  
TCGCGATTCCGATCCCAAATAAAAGCGCAAACACTGTGCTAAAGCTATATTCGAATCTTTTATTCTGAAG  
TACGGTCCAATGAAGACGTTTATTACGGACATGGGNACGGAATATAAGAATTCAATTATAAACGATTTGT  
GCAAGTATATGAAAATAAACAACATAACATCAACTGCACATCATCACCAGACAGTTGGAACAGTAGAAA  
GAAGTCACAGGACTTTTAACGAATACATACGATCATATATATCAGTTGATAAACTGATTGGGACGTATG  
GATCCAATACTTCGTNTACTGTTTTTAACACGACCCCTCTATGGCACACAATTATTGTCCATATGAGCTAG  
TTTTTGGTAAACACCCAATTTACCAATATAAATAGNATAGANCCACTATATAACGTAGANGATTATGCTA  
AAGAAGNTAAGTNTAGATTAGAANTAGCATATAAAAGGNCTAGGATAATGCTNGAAAAACATAAAGCAA  
AAAGTAAGGAACNTNTGATAAAAAAGTTATAGATTTTCAAGTANAAATAGGAGATAAAGTCTTATTAAG  
AAACGAAACNNGGCCATAAATTGGATCCAGAATATATAGGCCCATATACAGTAGTTAACATAGAAGATAG  
GGATAACATTCTAATTAAAGATAACAAAAATAGGACCCAAAAAGTTCATAAGGATAGACTAAAAATTTTT  
AACGAATAAAACATATAAATGTTCTATATGAAGTCTTTATGTTCTTTTATGAATTCACAACAAATAACAAG



TAAGAGGTTCTAGTCGGGAGCTCCCGACTAGGGGATACCCTGAAGAGGTTCTAGTCGGGAGCTCCCGACT  
AGGGGATACCCTGAACCCTCTTCTTCCAACATCAAATGCATATATATATTCTATTTTAGAAGCTATATGTC  
AAGTTTGGTGACTCTAGTCGGGAGCTCCCGACTATGGGATACCCTGAACCCTCTTCTTCCAACATCAAATG  
CATATATATTCTATTTTAGAAGCTATATGTCAAGTTTGGTGACTCTAGCTCTTATTATTTACCAAAATTGCC  
CAAAAAAGGATATCGATATTGATTTTTATCGATTGCTTGGAACGGAGTAAGCTATCGATTATCGGAAAT  
AAACTCGATCTGCGCGGGAAGTACTAGGAGCACCTACATCTAAAATTTCAAGTCTCTAGCTCTTATATGTTCTG  
AGATCCTTGCGTTCATACATACGGATGGACGGACGGACGGACAGACAGACGGACATGGCTAGATCGACTC  
GGCTATTGATGCTGATCAAGAATATATATACTTTATGGGGTCGGAGATGCTTCCTTCTGCCTGTTACATAC  
GTTTGGATTTTGCACAAATACAATATACCCTTATACCCATTTTTTAATGGGTTCAGAGTATAAAAAATACATA  
TACATTGGCCTGATCAACCAACTATAAAAAAAAAAATCAATCCTTGAAAAATACAAGTTACTATAATGAAT  
TTTACGTTTTTATATTTGATATCTTTATACTTTGAAATGTTTACATGAGTATATTCCCATAAATCTTAAATA  
ATTTTTTTAAATTCATATTATTTTTATCATATTTTTACATTTTATTATTTTTATAGCAAAAAAA  
>9\_rnd-5\_family-83\_\_LTR\_\_Gypsy  
TTGTAGTGGCGCTTGAAGCAAGAACAATTTGTTTGAGTTTAAATAAACAGCCCCAAAAATAGACAATGTAA  
ATCCAGCCAACGTCTTGTACCTTGCTTACCCTAGTAGACCTCGCCATCTATGGCTCAACCCGGGCGTAATA  
TCGCTTGTAACGAGTGAAAGAGAAAAATAGTAGAGGAATGTTAATTTGATAATTGGAAATGGCGTCTGTCC  
TGGTGTGCTGTAAATAGCTTTCCCTAAGCCGATCGGAGCTCAGATCTTTCTTTTTACCTTTGGTCCACCGT  
GGAGAAAGGTTGACTCAAAAAAGTAAGAAAGTGCGCCTATTTACAATCGCGCTTAACCTCTGAGAAACAG  
TATTTTCTGAAGCATCATTTTTAATAGAAGTAATTTCAAAAAAATATCTAAGTGCCCGCATCGATGAACCA  
CTTCTCAGCCGCCAGTTGGTTCGCAAAATTAATTGAGAACTAAAAAAATAAAAAGTGCCAGACCCAATC  
AGGGGTAAAGTCAGATTTGTTTTTTGTTGAACCAAAAAGACTAAAAAGCACTTATATTTCAACCTGTCTATT  
GCAGGTATGGCGCTTCGTAATATTCTCATCAACAAAATATAATGAGATATTATAGTCTTTCGACTTTCTGC  
AATTAGCAGCGGCAAAACATTTCTTTTTGCCTGCCGAAGCCCCAAAAATATGCAGAGCGCCTGTAATTGTCATC  
GTTAATTCGCCTTGTCGCAAAATAGCTTAATCAGCTGCGCCAGCTTTATCGCATCGTCAAATCTCGTTGTTT  
CGTTTCGTGCTCTCTAGCCTGCTCGAAAATGGGAGTTCGAAAGACGAATTAGTAAGAGACGATCGCCGTC  
GCCGAAACTCCAAAATTAGTTGGAAATCGTTCCCTGGTGGCTGACGTGCTCAAAGCAAGCTACATTTATCT  
TGGTCGCGCAATCATTTTTTTCATATAAGCGAAACGAAATCTTATTTGTGTTATTATTTTTGCTGGAAAAATG  
AATAATTAGCTTAGCTAACAAAAAGTGAAAACTGAATAAGTCCTATTGTGAACGCCATGGGCGTAGTCA  
AAGTCGCCTTAAGCGCATAATTTAAAATTTTACATTAGTTATGTGCGAGTTTCTTTTCTTTTTCGGCAAAA  
GAGTGCAACCGCATGGTCAAATTCTTATTCCGCATTGTTTTTCTTTTAACTCCGTTTTGCCCTACATATTCT  
TTTCCATTGGCCTATTTTTATCTCTCCTTCTCTCCTTCCATGCTCCGAAATTCGGATCGCCATATTGCTGGTG  
AGAACCAGATNTTAAACAAATTTCGAAAAGAAACGTGCNAAGAGAAAGANAGAGAATACGAGTCACATG  
AAGTTCGAAAACGTTGTTATCTAGTGCCTTCTTTTTTTTTTCTAAATTTTTTTGTGTGCAATTCGAAGTGATT  
TTTTTCAGCAGATCATCGCACGTTACATCGATGGAAGCGCTTTCGGAGATGGAGTGAATGCATGTAAGTG  
AGCAAAAACCTCTTAAATTTTATTTTTCTTTGCACTTAATTTCCGAGAAAAATCAAAAGAGAATGGCCTAATA  
ATAATTTAATGGATAATTTAATGCCGCGCTTAAAAGCAAAAAAATCGGTAAAAAGAAAAACGTTAAATTA  
ATCTATTTCAAGTGAGCGTTACAGCTTTCGCTAAATGAATTA AAAATTTAATGAATTTTTGTGCAACAAA  
AAAAANAAAGGAATAATTTTTACTTTTTACCAATTTGGGTCNTAGACCAAATTAGAACCTCACCTAGAAA  
AAAATCTTTATCTNTGTGTAATATAAGTCTTTTATTAATTTTCTTTTCTTTTCTATTATAAAAAATGTATAA  
TGGCTAAGCAAAATTTGATTTAACTCCCCAATTCACCACAAAAATAAATATGTGTAACGAACCTTATAATT  
ATGTGCTAATTTGCCTTATTTATGTTGGAAGCCATGCGTCGTCGGAATGTTAGGGTAATGTAATCTGTGTT  
GTTTTAGGGATCACCGACCATTTGTCTGGTCAAGCGGCCCCGGTGATCATGGTAGGGTGGGCAACAGCTG  
TCGCATTGATACCAGCGCAGCATAACAACAACATATACAGCTACGGTCCCTAATCAATCTAATACAATTT  
GGTAACTCTGTAGATTTTTTCTTAACCCCGTAATTTTGNNTGTGCAATCGAACTAGACATCTTAATAGCA  
CGCGAAATTTTTATATATAATTATAAGAGCTTGCGAGCAGGTAGCTTAGCCATTTATGAGTCAACCCACCC  
CAGCCGACTTCACTGTGCCGGAACCAGCGCGTGCTTCGCTAGACGCTACACGGACATCAGCTCGCTTACA  
TACGTTGTATGTTACAGTATATATCATATATTTATATATTTGGCGCCCCAAGTGGGGTATGAAGCAGCCAC  
TCTGGCTGGTCCCGACTAATAACTCTTTACATTTGTCAACAATACCTGACAATACACAGCTAGATCGATTT  
GTTTCGTCACTCCCCATTGTCCTGTTATTTGCAATACGTTTTTGGATCAGCTACAGCTTTGAATTAGTGTA  
CTGCCAAGACGTATTATAGCGAATAACACATGTTTTGTTTAGAGTAACTGGATGCGTTTTAACTTTAAATT  
GTTATAACTCCGTGATCTATAATTACAGAACAAATGTAAATCCCAGTATGATTGTTTGGTCGTGCGTAGTAG  
ACTTTGGATATTTGTTATACGCGGAGAAATGTGCAGCGGCAATCCCGTTTACTGCTACACCGATTCAATTA  
TACCCTTCTGTTGCNCTATGGAGTTAACTACTTTTCATANTAAGTCGTTACCTAGGCAACGGCTATCCCTT  
GCATCCTAATCTTTTTTCTTATGAGGGAGCTTCTGGAGCCTTACTGACGTGTGTTATACCAAGTGATCAA

ACTGTTGTCTTTTCGCCTTTTTGATCTCGTACTGGTCACATCATAAGAGTAAGCCGGATCTCAANCTNACCA  
TTGCCNCTTGNTGAGNAAGCNAATGTTTTTCAGATATTAGTTACTGCTGGAGTCCAGTGTACTTGGTGTAGA  
ACTGGCACTTGCCGCTTAATTATTAATTTTTGTTTTCTCATCCCTATACCCTTCCTTGTATTAGTTGATCAG  
TTTTGAAGCTGATGCAGATTATAACCTTTCATGAAAACGACTGCATGGCATCAACACATTTTTTATGAAATA  
TTGTTCTATATTTTCGATCTGTTAATCGATTTTGCACCTTTTTTTTTTAATTTTAATTCTTGTAGTATTTTAT  
TTTAAGCGTAGGTCGGAAATGTCAATACATCGCAGTTGCGAAAACCTTAGCAGCTGCTTCGATTAATAAGG  
AACNGCGCTATATTTGACTTAAAACGATTGAGTTTTCTACACAATTAGTAGCTACCAGTCGCGAGCACACA  
TTCCATCGTGCATGCTATAATACTAGAGTAGTAAAGAAAAATATTTGCCCTGTTTGCAAAACAACAATTTT  
ACCGTCTAACCCAAGTGTGGTAGACGACGCCCTCGCAAAGCAACCGACGATAGTTACTATGCCAATTGGA  
ACCCGAAGTCAAGGCCCCCGAGAAGAGATTTTTTCCCAAGGCACCATGTCGAAGAATCCTCGTCCGCCAAG  
TGTTCCGCCTTTGGCAGCCGAGCCAGATGCATGCTCTCGTGTATCCCCACGAGAAGCGAAATACAGCAGT  
CAATTTCTGATTCAATGGCAGCAGCCACAGAAAGACAAACAGCCTCCCTGACCCAAACTTTACAGTCAGG  
ATTCCAAAATCGTTTGTCTGCTTTTACAGCTCAACTAGGCAGCTCCACAGCTCAGCAACCAACTTCGAACA  
TGAGTATTGTGATCATCCTCAGCCNGACCGGCTAATTCTATACGAAACGAGTCTAGAACTAGGAGCTCT  
CCAATGTTAGAAAACCTTGCGTCCAGACCGACTTAGCCAAATAATCAGTAACTGGAACTTAGATTTTCTG  
GTCGATCGGGCATGGGTATAGATGAGTTTATCTATCGCGTCGAGGCGTTAACAGCCGAGACATTNGATGG  
AAATAATGAGTTGTTGGCTCGTCATATAAGCCATCTATTTGAAGGCAGCGCTAACGATTTCTTCTGGCGCT  
ACCATAAGAGTGTCCCTATTATCTTATGGTCGGAATTATGTGTCGCTTTACGTGCTCAGAAGAAGTTCAA  
GAAGAGCGACTTGATGTTGACATACGTGCGGCAATTGATCGTCGTAAACAAAAAGAGGGTGAGTNTTTCG  
ATGACTTTNACGATGCAATTATTATATTGACCGACAAACTGTCTCTACCCTTATCGAATTCCTCCTTGCTGG  
AATCGTTGCGCTCTAATTTGCTGCCAGAAATTCAGCACGAGCTTCTTTATGAGCCCATACATTCTATCGCG  
CAACTTAGACATTTAGTGCGAAGGCGGGAAGGTTTTATTCAGTCAATTTCTAAAGCTCGAGTGTGTCACC  
CCGCCCTGCGCCTCGTCNCTCATTGCACGCTATAGAAGTACAACTGAAAGCGAAGCAGAGTCCGATGCG  
ATAGACNTTCTCGATAATGATGTATCAGCCATCAGTCTAGTCTGCTGGAAGTGCAGGAAATCTGGCCATCG  
GTATCGAGATTGTGTGCGCCGAACGCAAAGTGTTTTNCTATGGCTGTGGTCAGACAAACACTTACAAGCCA  
ACTTGTGCCAAGTGTAACAATGTGCCAAAAAACTACCTGTCTCGTGTACCATTGACCGGTACACGCAAAC  
CAGTTGCATCCAAGGCAACAAATACCGACTAGAGGGAGAANTAGAATCCTCTAATCAATCTTTACCTGAC  
TTGTCAATTAACCCAGAATTTACCTTACATACTCGTTTGCAATCTCAATCTGTTAATAAAAAATACTTCTGTA  
AGTCGCAAGATATTACGAGCGCGATTACGTGCAATAAATTTCTTCAAGCGATGTAAGATCGAGAAACAAG  
CTCTCGTGNACGCGATCGTGTGTACCGATTCAAGGCCTTACGCTGAAGTAACCGTATTGGGAAAAACTGTT  
ACAGGATTATTGGATACCGGTGCGTCGATAAGTTGTTTTGGTGGTAGTTTCGCTGTGGAATTGTTGAATAC  
AAANGTACTGTATAAACCGATTACTTCACAGGTGAAAACCGCCGATGGAAAAACCCAACAAATATTGGG  
ACGGTTACGCACAGAAATTTATTATGGTGGAAAGGTTAAACGAATTACTTTTTATATAGTCCCTTCTCTTG  
TTCAACCGCTTTGTTTGGGCATAGACTTTTGGTCAACGTTTGAGCTGTTGCCTCCTTGCTTGTTAAGGCCAT  
TGAGGATTGCTGCGAGCTTTAACTGCACACCAACAGCAACGTCTTGCAAGAAAGTGTAAGCTATTTCCCT  
CATTCGCGGAAAAAGAGTTAGGAAAAACCATCTAACTGTCTCATGTATAGATGTAGGTAACGCAATTAC  
TATCAAACAACGACACTATTCCTGATCTCCTGCAAGGGAGAAATTAATGTTCAAAGAAATTGATCGTATG  
CTTCCCTTGCGGTTATTGAACAATCGGAGAGTTCTTGATCTTCCCCAGTAGTGCTCGTTTGTAACACAGG  
AAAGGTTGCTCTCTGTATTGATTGCAGAAAAGTTAACGAGGTTACTCGAAAGGATGCTTATCCGATGCCCC  
TAATTGATGGAATTATTAGTCGTCTTCTTAAGGCTGAATATATTACCAGTCTCGACTTAAAAGACGCTTAT  
TGGCAGATACCCTTAGAACCCAGTTCTCGTGACAAAACAGCGTTTGTAGTACCAGGTAAACCCCTTTACCA  
ATACACGGTAATGCCATTTGGTTTGTCTAACGCCCCTGCTACGATGTCAAATTGATGGACAGGATAATTC  
CAGCTTACTTAAGAAATGAAGTGTTTATATATTTAGATGATCTTCTTATAGTGTCTGATACATTCGACCGTC  
ATCTTGCCGTGTAAAGTGAAC

>9\_rnd-1\_family-300\_\_LTR\_\_Pao

TGTTGCGGGACGAATTAATTTATCGATTGTTTAGTATTAAGTATATTCTGAAAGTATGTATNTTTGCCCTCC  
GAATGTACGGGCACACTGTATTTGGCTTGTTGCCGCCATTACTTAAATGTTAAGCTCATTATTGTCGTGAG  
TTCGAAGGCCGTAGGAGGAAAGACTGCGGTAAGATTCCGAGGGAATATATATCTAAGTTCTAACCTATGT  
AATCCGTTTAGAATAAAACACTTGCCTAGCACGTTTTTGCAATTACGCTGTCTCTAGTAACATCGGAGTAAC  
ATGGCCGGGGGCCAGGCGTAACTTGCAGTGTTCAAATTGCAACTCCACCTTCGTTTGGCACGCGACATG  
ATCTTTTATTCGAGTTCTTATTGTAAGAACTGCAAGGGCGACTTGCGCTGAAGACAAGACGTGGTGTA  
CNTTGGTGTTACAGTGTGTGTACATAGACACAGCACAGGCAGGGCCTCCACCCAGTTATAGAGTCACCAT  
TAGTACGCAGCCAGCGTAAAATATAGCAGAAACCATCTCCGAGCTGAGTAGGATGACACAACGGTCACCC  
AGGAAAAGCCACGCTTAAACGATGGCCAGGAGATAGCTACCACGGCGAGTGGGACGCAGACAAAGCGG

ACAAGTAGAATGGTGAGCACTGTATCACAAATGCAAGTTCCCGCTGTTAGCGCACCACAAAGCCCCAGCA  
CCGTGGATGTGGGCACAAGTGTACAACCTGCCGGCACTGTGGCCGCGGGAGTGAGTGCACGAGCCAGCA  
CATTGACAGGAGCGCCAAGCCCAAGCACGCAACTCTCAAGTACGCAAGTCATGGATTTGATAAAGAGAGT  
CGCTGCGCTAGAGCACGAGTTGCAGAGGTCAAAAACCTGGTCAAGCACATGTGAGTACAGTTACTGATCCC  
GTTAAGTTGAGTAGTGCTGGCGTGAGTGGTACAGCTAACCTGCCGCCATCTTTGATCGGAGCNTTGAGCG  
GAGAGCCATCGTCGAGTGGAAGTTTGAGTGAACTGCAACTATGAGTGTAGTCCCAAATTCAGAGTAAG  
TTTGAGTGAACTGCAATTTTGAGTGGAACCTACCATTTTGAGCAGATCGCCATCTTTGAGTGAGGCACTGC  
CTACGTCATTGAGTGGAATTTGGGAACACAGTTGCAAACGGTAGAACGGGCTACAGTTATGGATAACTG  
CTCTACAACGTCAAGCCGCTCGACGCCATATTGCTTTGCAGGCATTGCACAGCCAACGCTCAGCTACACTC  
CGGCACAGGAGAACCAACAAGCGATAATTTTGAGGCCAACGCAGGCAACTGGGAACTTCGCATGGACGA  
CTCCCAGGAACGATGTATGCCTGCCACGCAAATTACCAGATCTACCCGAGTTTGAGAGGCCAACCTGAGGA  
TTGGCCTATATTCTTCTGCGCGTTTACGGAAACAACTTTGGCGTACAACTGTACGAATCTGGAGAATAACC  
AGCGATTGTTGAAGGCACTCAAAGGCGAAGCACGTGACACTGTGAAGTCGTTGCTCATACATCCCAGGAA  
TGTGAACAACGTAATGGAACAATTACGTTTTAGATACGGCCGCCAGAACAGCTAATACGCAGCCAGCTA  
ATTAGTATTCGAGAGGTGCAGCCAATTCAGGAGCACAGCATAGCTAAAATCGTGCCATATGCTACACGCG  
TGAGTAACCTTGCCGCCTTTCTACAATCGGCTAACGGGGAACAGCATTAGCGAATCCTACACTGATGGA  
GGATTTGGTCGCTAAACTACCACCAAGCAAGAGGGTGGAAATGGGCCAGACATGCAGCTACGATTAGGCCT  
TTCCCGACGGTCGTACATTTTAGCGCGTGTTAACGGACTACGCCAATGTGGTATGTACGATTGTGGACGT  
CGATAGTAAGGAGCAAAGGCGTAGAGTGCTGCATGCCAGCATTGACCAGAATAATGAAGGGCGTCACCG  
AGGTCGCACCAAACAGTGTCCAATCTGTAATGGACAACACGCAGTCAGGGACTGCAACGAGTTTAACTTA  
GCCTCTCCGCTAAAGAGGTGGACAGTCGTAAAAAGGCACCGGCTTTGTTTTTCGTGTTTACGAGTTGGCCA  
CATGGCAAGAGTCTGCAATAGGGCCAACGAATGCCAAGTTAATGGATGCCGGAAGAGACATCATCGACT  
CTTACATGATCATGATGCCATGAGTCACAATGCACCGCANCCAGCAGGTGATAGAGTGATGAATACTGGA  
CGGATGCCGCAGCCAGCGGATCCTCACACAAGGGCACCGCAGCCAGCGGATGCTCAATCGACGCAACAA  
AGGAACTTAAGTTGTGTCGATTCGGATGGAGAACGCCTACTATTCCGCATATTGCCAGTGACGTTGCACG  
GGGCAATAAAGCGGATCGATACGTACGCGCTCCTCGACGAGGGCTCGTCTGTAACGATGATCGACGACGA  
GCTACTGCGCGATCTAGATATCAAAGGGGAACGCAGGCAACTAAATATACAGTGGTTTGGTGGAAGAGC  
AACCAGAGAGCCGACCACAGTGGTAAGCATGGAAGTTAGTGAGCGGACAAGCGCAAACGTCATGTGTT  
GCGAAATGTGTACGCCGTGTCCAACCTGAGCTTACCAATGCAAAGCCTGCATCGACGTGACGTCCAAATG  
TGGGGCAACGGTGCACGTCTTCCAATGAAACCGTATCGCGGGGCGGTACCAAACTTCTGATTGGACTTG  
ACCATGCGCATCTTGGACTGCCAATGCAAACAAAAAGATTTGCACCACAGGGACCATATGCCGCAGCCAC  
CGAACTTGATGGGTGGTTTTTTGGGCCGGTAAGAGGTCAACCGACGGCAACGTCATCAAAGTCATGCCTC  
CTAGCAGTGTGCGCAGGAGGATGCAATCCAAAAGATGGTAAACGACTATTTTGATATCGAAAACCTTCGGTG  
TGAAGCTTACGCCACCAGTCGCAGCCAGCGACGATGCACGAGCACAGAGGATACTCGAAGACACCACGG  
TGAAAATAGGAGAACGTTACCAGACGGGTTTATTATGGAACCGTGATAATGTTGAGTTGCCACGAAGCTA  
TGATATGGCATACAAAGATTGGTCAACATTGAGAGAAAGATGAAGCGTAACGATCGGTTTAAACAAGC  
CTATATGAAAATTATGGACGATTATGTTTATAAAGGATATGCTCGACGATTGAAGCAGCATGAGGTGCGT  
TTAGCCAACAGCGACAACTTTGGTATCTTCCGCACTTTGGAGTTGAAAATCCAAATAAGCCCCGGTAAGA  
TAAGACTCAGCATTGATCATGTCAACATTCGATCCTCTGGGATTTCTTAGCTGCCTCATGATAACTGGAAA  
GTTACTAATGCGTGAGATTTGGCGACGAAATGTGCAATGGGATGAACCCTTACCAGATGAGATCGCCCGG  
GCCTTTAGCAAATGGCTTCAGGATATGAACAACGTGGAAGGATTTTCGGAGCTCGCGCCATTACTTCGGCC  
CAACACCTGTGCGGGCAATACAGCTGCACGTTTTTGTGCGATGCTAGCCAGTCAGCATTTCGCAGCCGTGACT  
TACTTGAGGGTCACCTACGACAACAACGACGTGCGAGTATGCTTCGTATGTGCCAGGACGAAGTGTGCCC  
CAATGAAGACGATGTCAATTCCACGACTGGAATTGCAAGCAGCCGTGTTAGGAACGAGGCTGATGGACAC  
TGTCAAAAGGGAGCACAGTATAGCGATCAGCGACGCTATACTATGGACTGACTCCAAAACCTGTGCTGCGT  
TGGATAGGCAGCACCCACCGTCGATATAAGCAGTTCGTTCGGAAATCGAGTGGGAGAAATTTTGAGTCAA  
CAAAGGTTTCCCAATGGAGATGGGTACCTACTGCTGAAAATGCAGCAGACGACGCAACGAGGCCGCGATTG  
CCACGTAGACCTCAGCCAACGGTCACGATGGTTAGACGGGCCAACATTTTTGCGGCAGCCGGAAGCAGC  
TGGCCGCAGTCCGAACCGGGCACGGAACACTCATCCTACGAAGATGAAGAAGAGATGCCGAGTGAATTT  
GCCTTAGTTGCAGCAAATAACTTTTTTCATTTTCATTTTCAGAGATTCTCTAGCTACAGTCGGCTGGTGAGGAC  
GACGGCTTGGGTTTTAAGGTTACGCGCTGGAGCCGTGGACAGAGGACTGAGCTTGAGAGATTTCGGCCTC  
ACCGCGACGGAGTGTGAGAACGCTGAGAACCTTGCTGATACGGCGAGCGCAATGCGAAGCGTTCCCTGAC  
GAGGTTTCGAGCCTCATACAATGAAGAATCAGTCGGTCATCGAAGCGACATAAGAGGGCTGGCGCCGTACT  
TGGATGACAATGGAGTCTTGCGTGCGTATGGCAGGATCGATGCCGCACTGTGTATACCGCATAGTGCGAG

AAGGCCAATAATATTGTACACCGGCACGCACTGACGGAAGTATTGTGTATCACTACCATGTGAAAATG  
AAGCATCAAAACGTGGATGCAACGATAGGCGACATCAGGACCAGATTTTGGATAACAAAGCTGCGTCGA  
CTGTTGCGTACAGTAATATCTGGATGTAGTGTGTGCAAACCTACATAGAGCGCAGCCAGCGCCACCTATAA  
TGGGTCCTTTGCCAGAGGACAGACTGGAGGCCAATGGATGGCCATTTAAGTTTACGGGTCTGGACTATTTT  
GGACCACTCCTTGTGACGATCGGACGTCGAAAGGAAAAGAGATGGGTCGCCTTGTTCACGTGTCTGACGA  
CAAGGGCCATACATTTGGAGCTGGCACATGACCTGTCAACTGATTCTCTGCATAATCGTAATCAGGAACTTT  
CTTTGCCGTCGCGGACCCGTACTGAGGTTGCGCAGTGACAACGGAAAGAACTTTGTTGGGGCCAACAGAG  
AAGCCAAAAGGCTAATAGATGTATTTCGAGCCGGAGAAGATTCAGGGTGAGCTATCTTCTAGAGGCATTGA  
ATGGATCTTCAACTGCCCAGCGAACCCAGCTGAAGGGGGGAGCCTGGGAAAGGATGGTGCAGTGTGTCAA  
GAGAGTGCTACGCCACACAGTAAAGGAAGTGGCACCAAAGCAACACGTAAGTGGAGAGTTTCCTGATTGA  
GGCCGAGAACGTTGTGAATTCTCGCCCGCTTACCCACTTGCCGGTGTCTGTGGACCAAGAAGCCCCCTAA  
CACCGAACGATCTACTCAAAGGAGTGGCCAATCTGCCTGACACGCCCCGCTATCCACGAGCAGCCGAACGA  
GAGATGCGTCACGAGGAAGCAGTGGCGCATGGCGCGGCTGTTACGAGACCGTTTTTGGAAAGCGGTGGGTC  
TTAGAGTACCTGCCTACACTTGTGCGACGCGTGAATGGTGTGCGCGCGTGTGAGCCGATACGCCATGGTG  
ATATGGTGTATTATATGCGACCCGCGCGTGCCACGCGAGAGTGGCGAAGGGGCATAGTGGAGGAGCTCTA  
CCCTGGACCAGATGGAGTGCCTCGACGCGCCAGCGTCCGCGTGGCGGACAACAACCGAGTGCAGTGTG  
ACTCGTCCCGTGGCTAACTAGCCATACTGGATGTGAGTGAAGCAGGGCCTTCACGGGGGCGGGGATGTT  
GCGGGACGAATTAATTTATCGATTGTTTAGTATTAAGTATATTCTGAAAGTATGTATATTTGCCCTCCGAA  
TGTACGGGCACACTGTATTTGGCTTGTGCGCCATTACTTAAATGTAAAGCTCATTATTGTCGTGAGTTTCG  
AAGGCCGTAGGAGGAAAGACTGCGGTAAGATTCCGAGGGAATATATATCTAAGTTCTAACCTATGTAATC  
CGTTTAGAATAAAACACTTGCCTAGCACGTTTTTGCAATTACGCTGTCTCTAGTAACATCGGAGTAACATGG  
CCGGGGGCCAGGCGTAACTTGCAGTGTTCAAATTGCAACTCCACCTTCATTTGGCACGCGACA

>9\_rnd-1\_family-192\_\_LTR\_\_Gypsy

CATTGCCGCTTAATTATTAATTTTTGTTTTCTCATCCCTATACCCTTCNTTGTATTAGTTGATCAGTTTTG  
AAGCTGATGCAGATTATAACCTTTCATGAAAACGACTGCATGGCATCAACACATTTTTTATGAAATATTGTT  
CTATATTTTCGATCTGTTNATCGATTTTGCACCTTTTTTTTTGTAATTTTAATTCTTGTAGTATTTTATTTAA  
GCGTAGGTTCGGAAATGTCAATACATCGCAGTTGCGAAAACCTTAGCAGCTGCTTCGATTAATAAGGAACNG  
CGCTATATTTGACTTAAAACGATTGAGTTTTCTACACAATTAGTAGCTACCAGTCGCGAGCACACATTCCA  
TCGTGCATGCTATAATACTAGAGTAGGAAAGAAAAAATATTTGTCCTGTTTGCAAAACAACAATTTACCCGT  
CTAACCCAAGTGTGGTAGACGACGCCCTCGCAAAGCAACCGACGATAGTTACTATGCCAATTGGAACCCG  
AAGTCAAGGCCCCCAGAAGAGATTTTGTCCCAAGGCACCATGTGCGAAGAATCCTCGTCCGCCAAGTGTTC  
CGCCTTTGGCAGCCGAGCCAGATGCATGCTCTCGTGTATCCCCCACGGTAAGCGAAATACAGCAGTCAAT  
TTCTGATTCAATGGCAGCAGCCACAGAAAGACAAACAGCCTCCCTGACCCAACTTTACAGTCAGGATTC  
CAAAATCTTTTGTCTGCTTTTACAGCTCAACTAGGCAGCTCCACAGCTCAGCAACCAACTTCGAACATGAG  
TATTGTCGATCATCCTCAGCCCAGACCGGCTAATTCTATACGAAACGAGTCTAGAAGTACAGGAGCTCTCCAA  
TGTTAGAAAACCTTGCCTCCAGACCGACTTAGCCAAATAATCAGTAACTGGAACTTAGATTTTCTGGTTCGA  
TCGGGCATGGGTATAGATGAGTTTATCTATCGCGTCGAGGCGTTAACAGCCGAGACATTAGATGGAAATA  
ATGAGTTGTTGGCTCGTCATATAAGCCATCTATTTGAAGGCAGCGCTAACGATTTCTTCTGGCGCTACCAT  
AAGAGTGTCCCTATTATCNTATGGTCGGAATTATGTGTCGCTTTACGTGCTCAGGAGAAGTTCAAAGAAG  
AGCGACCTGATGTTGACATACGTGCGGCAATTGATCGTCGTAAACAAAAAGAGGGTGAGTCTTTTCGATGA  
CTTTTACGATGCAATTATTATATTGACCGACAAACTGTCTCTACCCTTATCGAATTCCTCCTTGCTGGAATC  
GTTGCGCTCTAATTTGCTGCCAGAAATTCAGCACGAGCTTCTTTATGAGCCCATACATTCTATCGCGCAAC  
TTAGACATTTAGTGCGAAGGCGGGAAGGTTTTATTAGTCAATTTCTAAAGCTCAGAGTGTTCACCCCCG  
CCTGCGCCTCGTCCCTCATTGCACGCTATAGAAGTACAACTGAAAGCGAAGCAGAGTCCGATGCGATAG  
ACCTTCTCGATAATGATGTATCAGCCATCAGTCTAGTCTGCTGGAAGTGCAGGAAATCTGGCCATCGGTAT  
CAAGATTGTGTCGCCGAACGCAAAGTGTNTNCTATGGCTGTGGTCAGACAAACACTTACAAGAGCCAAC  
TTGTACCAAGTGTAACAATGTGCTAAAAAACTACCTGTCTCGTGTACCATTGACCGGTACACGCAAACCA  
GTTGCATCCAAGGCAACAAATACCGACTAGAGGGAGAATTAGAATCCTCTAATCAATCTTTACCTGACTT  
NTCATTTAACCCAGAATTTACCTTATATACTCGTTTGCAATCTCAATCTGTTAATAAAAAATACTTCTGTAAA  
TCGCAAGATATTACGAGCGCGATTACGTGCAATAAATTTCTTTAAGCGATGTAAGATCGAGAAACAAGCT  
CTCGAGTCAGCGATCGTGTGTACCGATTCAAGGCCTTACGCTGAAGTAACCGTATTGGGAAAAAACTGTTA  
CAGGATTATTGGATACCGGTGCGTCGANAAGTTGTTTTGGTGGTAGTTTCGCTGTGGAATTGTTGAATACA  
AAAGTACTGTATAAACCATTACTTCACAGGTGAAAACCGCCGATGGAAAAAAACCAACAAATATTGAA  
ACGGTTACGCACAGAAATTTATTATGGTGGAAAGGTTAAACGAATTACTTTTTATATAGTCCCTTCTCTTA

TTCAACCGCTTTGTTTGGGCATAGACTTTTGGTCAACGTTTGAGCTGTTGCCTCCTTGCTTGTTAAGGCCAT  
TGAGGATCCGCTGCGAGCTTTAACTGCACACCAACAGCAACGCTTTGCAGAAAGTGTGAAGCTATTTCCCT  
CATTCGCGGAAAAAGAGTTAGGAAAAACCATCTAACTGTCTCATGTCATAGATGTAGGTAACGCAATTAC  
TATCAAACAACGACACTATTCGGTATCTCCTGCAAGGGAGAAATTAATGTTCAAAGAAATTGATCGTATG  
CTTTCCTTGCGGTTATTGAACAATCGGAGAGTTCTTGGTCTTCCCCAGTAGTGCTCGTTTGTAACCAGG  
AAAGGTTCTGCTCTGTATTGATTGCAGAAAAGTTAACGAGGTTACTCGAAAGGATGCTTATCCGATGCCCC  
TAATTGATGGAATTATTAGTCGTCTTCCTAAGGCTGAATATATTACCAGTCTCGACTTAAAAGACGCTTAT  
TGGCAGATACCCTTAGAACCCAGTTCTCGTGACAAAACAGCGTTTGTAGTACCAGGTAGACCCCTTTACCA  
ATACACGGTAATGCCATTTGGTTTGTCTAACGCCCCCTGCTACGATGTCCAAATTGATGGACAGGATAATTC  
CAGCTTACTTAAGAAATGAAGTGTTTATATATTTAGATGATCTTCTTATAGTGTCTGATACATTCGACCGTC  
ATCTTGCCGTGTTAAGTGAAGTAGCGGGAAAAATAAAGGATGCCGGGTTGACAATTAACCTTGAAAAAAA  
GCAAGTTTTGTCTAAAGGAAGTTAATTATCATGGTCATGTTGTTGGTCAGGGTATTATTCGGATGAATGCT  
GATAAGATAACTGCCATTACCGAATATCCAGCGCCTCGCTCGCTTAAACAATTGCGTCGCTTTCTCGGTAT  
GACTGGGTGGTACCATAAGTTCATTCGAAATTACACTTCTATAGTTNCGCCATTGACTGACGCCCTGACAA  
ATCGAAAAAAGTTTGAATGGTCAGAAGCGGCAGAGCAAGCTTTCCAGGCGCTTAAACTGAAATGTGCA  
AGGCCCTGTGTGCATACACCTAACTTTGAAGCTTCTTCTACATACATTGTGATGCTAGTCACACTGGTGT  
GGGTGGTGTCTCGTCCAAATTAATGATACAGGTGACGAGGTCCCCATAGCATTTATGTCGCGGAAGTTG  
AACAAAGTGCCAACGTAATTATTCAGTTACGGAGAAGGAATGTCTAGCAGCAATTTTAAGCATCCGCAAGT  
TTCGAGCTTACGTCGAAGGCCATCCGTTTACTGTTATTACCGACCACGCATCCCTTAAATGGCTCATGAAT  
CAAGCAGATCTCAGTAGTCGTCTAGCTCGATGGGCTCTCAAGCTTCAAGGATATACATTTTCTATACAACA  
TCGGAAGGGCAGTAAGAATATTGTACCAGATGCTTTATCCCGTACTCACACGGAGGATTATCGGCTTTAG  
ATGTCGATGACTTTATTGATATGCAGTCTCCATATTTTAAATCCCAGGGTTATGAGTTGTTGAAGTCTAAA  
GTTTTGCAGAATCAGACTCAAATGCCGGACGTCAAAGTTATCGATGGCTTTATTTATCGAAGGTCCGAGCA  
TGCCTCAGGAGACAGAGTTGCGGATAACATGGTTTGAAAATTATGGCTACCCAAAGAGTTGGTTCCCCAT  
GCTTTGAAATTAGCTCATGATGATCCCTTAGCGTCGCATTGTGGAATGAATAAGACACTAGAGAGATTAC  
GACGATATTTATTATTGGCCAAATTTAGTTTCAGACGTGAAAGAGTATATTAATAAATGTGAAATTTGCAG  
AGCGACTAAACATCCGAATCGTGTTTTGAGACTTCCTATGGGAAAAAGTGGAGAACTCATCGATTCTTTC  
AAAAATTGTATGTTGATTATCTTGGACCGTATCCCCGTTCCAAGGCTGGTCATATTGGCATATTCATTGTG  
CTCGACCATTTACAAAGTTTCCTTTTTTGAAACCTGTTTCGCAAATTGACCGCAGATGCTATTCTACCGTTT  
TTGGAACAAGAGTTGTTTCACTGCTGTTCAATGGTGTTCATTTAAATCACAAATGTTTAACGATTTACTTC  
GAAAGTATTCGATACNCCACTCGGTTGATCCCGCTTGCTACTTCTAGAACGTACGAATAAGCAATAGAGT  
CTTAACCAGCGCTCACAATGGACGTGCAACCGATTTTCGGACAAGTTATAGCCCGTCGAAAATCGATTGAT  
GTGTGAAATATATGACGAACTGCAGATTTGCGTTTCCGATCCCCAGACTTTTTTCTATTCAAATATTAGTTT  
ATTTTCAAATCTTATTTGAGAAAACCTAACCCTCTGACCCAGAATCTAACAGAGTCCTACCCAACCTGGTAGCA  
AGCGGACAGATCCATGACACGAGTCCCCAGTGCTGCCAATATGACTGGACAATGTGGGCCATTCAATTCC  
TCTTGTTTCTTCGGGATCGACCAGAAAACGACAGCTCAGCTAAAAGGTGCCTAAACGCCTGCTGAGAGCA  
GTCTCGAAGTCGAACTATCAAAGAACGAAAAAAAGCCAAATTGCCAAACTGCCTTTGGCTCCAAATTCCTC  
TATATTAATAAGGTATTGACCAAATTTTCAAAAAATCTGATAAAGTTTTTATGTTGGTCATCAATTCATAT  
AACTTTGCCAATATCAGTTTAAAATATCTTCTTGATACCTTGGTCCAGCCATGGTCATTAATTGTGTCGTTG  
TGTTGATGCAATGACTCATTAATCTGCTCTAGACGCATACGAAGGGTAAATTACGTCCGAAGGTACCAG  
CAATATAACGAATCAAATTTCTCAGCCTATAGGGGATAAATATTGCATGTACAAACTTTTATAATACCCA  
GAATATCAAACACATTTTTTATGTGGGAAGTAGACAATTCGCTTTGTTAGTAATGACACCTTTTGCATAGTA  
GAGCTTTCATCTTCTTGACGGTATATTTAAATTAGTCCAATTGTGCAATTGTGACAGATAATTA AAAACTT  
AAGAATGAAGCAATACACTGAAACAAATAGTTATGTATATTTTAGATTACCGTTGTTACATTNTCAGAAAT  
AAAACCATAGATCTAAGCACATTGCAGTGTACAAATAAACTATGAATTAGAAGAAATTCTGCACGACTA  
CAGCGTCCTGAAATCTCATGTAGTTTTTCACATGGTATTTGGTACAGTGGGGATTCTAGTTCAATTTGCTG  
AATAAGTTTACTCGTTCATTTTCTGGCCGAGAACTAAATCTGTCATTAAGTTCACTCGTTCAGTTATTCAGT  
CGGTTATGAACGATGAATTCTGCTCAGTAATTCAGTCGGTCATGAACTATTAGCTTAGTTCAGTTATTCAG  
TCAATCATGAACGATTATATTTCTGTTTCAAGTTTTCAGTTGCAAAATATATGTTATACTTT  
TTACTTATTATAGTGTACCATTGATAATAGATACAAATCAAAGTGAAATTA AAAATCCCGCTATCTTTTAT  
TTATTTATTTTATTTAGTACTGAACATCTCATAAGAATGTATCGTTCAGGAACGGCTGAACTGCTGAGTTG  
CAT

>Ref\_dvir\_728  
ACTGAAAACAACGACCGCCCAAATAGCTAAGTCAGCGTTCTCACGCTTGACCGTCGTTGTGTATACATAT

GTGCGCGCATGACTCTCTCTGACTCTCTTGCTGTATATAATAAGCCTAAAAACCATGTATGTAAAACGGCT  
GCTCACTGCTTCACGGTGGACAGCTCGAACTCCAAAAAAAACAGATAATAAAGAACCATCAAGAAAGA  
CGGACGTCTTTTAATCTTGGAACCATACATGGCGACCGTGACAGGACGTACAAAAACATGAAAACGTT  
AAGATACATAACTTCAACTCTAATTTTAAACCAGTCATAAAAGTAATTAAAGGAAGTAAATTTAAAGGAA  
ATATCACTCAAAAACAACCTGAAACAACGAAGCATCTGGAACGGCACACACCCTGGAGAATCAAAATTAA  
CTGAGTGAGTACAGGGGGCATGAGCTCTAAAAATACTTTAAGCTAAAAAGGCGCAGTGGCATTAAAGAG  
CGGATCAGGCAAAGAAAGTCTGAGATCGTAAGACTCTTATATAATCCCAAAACCCAATACCTTGGGAAAC  
TGCAGTCAAGCTACATGACGAACTCAAACATCTTGAGTAGTAAAGCCCCCTTCCCTCAGAGGAAAATTAT  
TAATACATCGACCACAGCCACAACCGATCCCGAGAAGGCAACGTGAATGCCCAGCAGACTGCGAGGGAC  
CGCTTTACAGCCAACATTGCCTGGGCACATGTCAGCGGCCACCCACGAGTAAAAACTAGTACGAGAGGCA  
AACCGCCCCCTTGTACCAACGCTGGAACAAGAAGTACGAGAGGCAGACCGCCCCCTTGTACCAACGCTG  
GAAAACACCAAGGGTGAACCTGACCGACAGCGCCACAGAGGGCGTACAGCAAAAAAAAAAATTTATAATTA  
TAATTATTATTAAAAATATTTGTAAACTATTGTAATGCCCGACGACAATTGAGTCGACCGGCAAGACGTTT  
GGCCCGTAAAGCCATTCGAAATACTAGGCAGGATAAAATGTACATTCAGTAAAAACTGAATTAATATTAA  
ATTTCTCCCCGCCCACGGGCGTAAATACAAAAAATTTTTAAATATAAACTCAAACCTTACAAACCTTATAAA  
GTTAATGAATAGCGTTAACAAAACCTATAAGTTTCATATATAAATCAAGGACCCAAGTATATATTAAGAATA  
ACAACCCCAAATATGGGTTTGGTAGACGTTAAGACTGTTGACTCGACGGCTAACGTAATAAATAAAGTTG  
AGGTCAGCAACACAGATGTAAAATTGATAACAATTTTTGTCTGTTATGATATTTGTCTATATTAGTAGGACAT  
CTATTGTACAATTATATACGTACCAGAGTCACGCAAATGACCTGGATAAAATCTAAATTTTTCTTGAACAA  
AATAAATAAATTATTCTTATTACCAGAAATGCCTATTAATAAGTTTGCATAGAAAGTATATTTAGAAGCAA  
TATATAATAGCGACGCAGACTTTAGAATTCGTGCATTGAATATTCTACAACAATAAGATAAAAGGCATAA  
TTTTAAATACACTGCCATAAGTTGGCATTAAAGAAATAGTGGTCCAGTGGACGGCGAGTGCCCAATTATA  
ATGGTAAACTTTCATAAATAGAGAACTATGGAATGGAGTGAATTAGCGAAAAAATAAATAATTTCAA  
GATAAATTCGAAAAATCTTATAAGTGTGTTAATAAGAACGCACCTATAAGGGTTGAAACGCTAATTCACC  
ACATAAACATATTAGTGCTAACTATAATAACATAGTTCAACTTTATTTAAGTAAAGAAAATAGGCTTAC  
AGAGCAGCATGTAAATCAATGTAAGAAAATAATCAAATCACTTGGGACTAGAATATCGAATATCAGCACT  
AGGCACAACATAGTAATAGATATCCCAACAGATTTAAAATTAATGGCAACTTTTGAACCAGATCAACTAG  
AAGAACTGAATGAGTCTAAGCCAACACTAAATAGTGACCCTGATATTGAAGCTGATAGCGACATTGAGCC  
ACTTGAATTAACAGAACCAACATGGCAGTAAATCAAGTGGCCTTAGACCGCGAATATGTAAGACAGGTA  
TCGTCTACAATTCCGGAATTTGATGGCAAAAAGCTATCACTGGCCAGATTTCTAACGGCTTTAAGACTAGT  
CGATCGTACTAAAGGTACACAAGAAGACAGCCGTAGAAGTCATAAAGTCTAAAATAATTGGCCCAATTTT  
GTACAAAGTACAAAATGAAACATCCATTATGGTATTATAAATAAATTAATAACCAATATCAAAGGCGAGT  
CAACTGACGTTATCAAAGCTAAGTTGCTTAACATAAAGCAGAAAGGCAAGTCAGCCTCGCAATATACAGC  
TGAAATTGACAGTTTGCCTAAGCAACTGGAAGCAGCCTATATTGACGATGGACTAGATTTTGATAACGCA  
GAGAAATTTTCTACTAAAGAAACAATATCTGCCATGACAAAGAATTGCGAATACGAAAAGCTTCGCATAA  
TATTAGAAGCGGGCAATTTTCAGCAATTTCAATGATGCTATGGGTAAATATATCCAATGCAGCACTGAAAT  
GACTGGAAGCCCAAGTACAATATTGTACTACAAAGGCAGAAATGATCGTGGAATTACAACCGTAATAAC  
CAAAGAGGTAGAGGCAATGGCCGCGGTAATAGTAATTTCCACTATAATAACAATAGCAACAATAGGGGT  
AATTTTCAGAGGAAATTACCGAGGTAGCAACCGAGGAAGAAATAATTCAAACCGAGGTGGCTACCAAAAC  
CAAAATAATAACAATAGAGGTAATGTCCGAGTAACTCAAGGTAATTCGGAAAACCAACAAGACCCCTCA  
GATGTTTCAGAGCCAATAAATGGCACAATAAAAACCATCAACCTTAATCTCAGCATATTTGTAAAAATTAA  
CAATGAAAGAACAGGTAAATCCTTTACACTGTTGCTTGATACTGGTGCAGATATATCTATATTAAAAGAA  
AATGTAGATATATTTGAAAACGTAAACGAAAGAGTTACTACCCAAAAATCGGGAATTGGCGAAGGAACA  
ATTTTTTCAAAGGCTTGGCCTTTATAGAACTCACTACAGGTAAATACATAATTCCGCATAACTTCCATTT  
AGTCGATCAAAAATTTCCAATACCTAGTGATGGCATACTAGGCATAGATTTCATAAAACAATATAATTGC  
CAATTAGATTTCACTCAGAGTGGCGACTCACTAATTCTTCGCCAAACAACCTTAAATTATCCGATTAAATT  
ACAAATACTTCATACTTGTGACAATAATGCCACAGTACTCCAGCTCGTTCCGAAGTTGTCCGTGAAATAC  
AAATACCCTCAATAAAAAAATCAAATTTTGATATTAAATCAAGAAATTGATGAAGGAATTTATATCGCAAA  
TACCATATCCAACCACAAAAAATACTTATGTCCGATTTAAATACAACAATCCAATAAGATGTAATTTAAAT  
AAAATAAAATATGAACTTAATTAAAAAACAACGAAGAAAGAGACAACCTTCGTTATGAAAAAATTAAT  
TAAAAACTTTCCACCTTTATTCAAATCAATTAAGAGTTTATGCACCAGATATACTGACATATTCGGACTA  
GAAACCGAATCAATAACAACATAATAATTTTTACAAACAAAAACTTAGATTGAAGGATGATGAGCCCGTA  
TACATAAAAAATTATAGAAGTCCTCATAGTCAAGTAGAAGAAATTCAAAAACAAGTAGAAAAATTAATA  
GACGATAAAATAGTCGAACCGTCTGTATCAGAATATAACAGCCCCTTTACTAGTTCCGAAGAAATCAC

TTCCAGATTCTGAAAAAAGAAATGGCGATTAGTAATTGACTATCGTCAAATTAATAAAAAACTATTGTC  
TGATAAATTTCCACTCCCCAGAATTGAATGATATTCTAGATCAACTAGGCAGAGCAAAATATTTTTCATGC  
CTTGACTTAATGTCAGGTTTTACCAAATTGAACTTGAAGAAAGTTCAAGAAATATAACGTCTTTTTCAAC  
GAGCAATGGCTCATATCGCTTCACGCGATTACCCATTTGGTTTAAAAATAGCACCAAATTCATTTTCAGAGA  
ATGATGACTATAGCATTTTCCGGGTTTAGAACCTCTCAAGCATTTCCTTTATATGGATGACTTAATAGTGA  
TAGGTTGTTCCGGAAAAACACATGATTAAAAACTTAACTGATGTTTTTGTATATGTAGGAAAAACAAAC  
CTTAAATGCTTACATCCATGAAAAATGTTCATTTTTTCATGCATGAAGTTGACATTTTTTTAGGTCACAAATG  
CACTGATAAAGGAATATTGCCAGATGACAAAAAATATGACGTCATCAAAAATTATCCAGTCCCACATGAT  
GCGGACAGCGCGTAGACGATTTCGTTGCATTCTGCAATTATTATAGACGTTTTTATAAAAAACTTTGCCGATT  
ATTCACGGCACATAACAAGATTATGTAAAAAAGAATGTTCATTTTGAATGGACAGATGAATGCGCCCAA  
AACGCATTCCAATATCTCAAAAAAAACTTATGAACCCACATTTATTACAATATCCAGATTTTAGCAAAG  
AATTTTGCATAATAACAGATGCAAGTAAACAAGCTTGTGGAACGTTGCAGTTTTAACTCAAAACCATAAT  
GGACTCCCCAACTTCCAATTGCATACGCATCACGTTCATTTACAAAAGGAGAAAGCAATAAGAGCACAA  
CAGAACAAGAATTAGCAGCAATTCATTGGGCAATAACCCATTTTAGACCATATATTTATGGCAAACACTTT  
ACTATTAACAGATCACAGACCATTGACATATCTTTTTTCTATGACTAATCCCAGTTCAAAATTAACCTCG  
CATGCGGCTAGAGCTTGAAGAATACGACTTCACAGTAGAATACCTAAAGGGAAAAGATAATTTTCGTAGCA  
GATGCACTTTTCGCGTATTAATATAAAAGAACTCAAAGATATGCAACATAAAGTCCTGAAAGTCACTACCA  
GGCGACAAAGTAGACAAAATAAAAACTGTACAGTAGAAAATTATGAACATCTGCCAAGGCAAAGTCATA  
AAAAAGTTTCTAAGCCCAACGTACATGAAGTCATTACAAATGATGAAGTACGAAAAGTAGTGACCTTGCA  
CATAACAGATACTATATGTTTATTTAAACATGGAAAAAAATTATCGCAAGAATTGAAGTTAGCGATTTA  
TATACTAATGGAACCCCTTGACTTAGGTCAATTCTTCCAAAGGCTTGAAACAGAAGCCGGTATATATAAAA  
TCAGCCAACTTCAAAGTGGCACCGTGGGAAAATATCTTTTGAACACGTTTCAATAGATAATTTCAAAAAT  
ATGGGCAATAAAATATTAATAATCTTTAAGAAGAGTAGCGCTACTCCACCCGGTGACCCACATAAAATATA  
AAAAATAATAAAAAAAAAAAAAAAAAAAGAAGCTATACTATCTATATTGTCTACACGACATGATAATAA  
CAGTACACAAGGAGGTCACAAAATACCTTGGCCAAAGTCAAAAGACATTACTATTGGAAAAATATGACA  
CGTCATATAACTGAGTACATACGTAAATGTCAAAAATGCCAAAATCTAAAATAACAAAGCACACAAAG  
ACTCCTTTAATTATAACTGATACACCTATACATGCTTTCGACAGGGTGATAGTGGACACTCCGCTACCCAA  
ATCTGAAAATGGTAATGAATACGCAGTCACATTAATTTGTGAATAAACTA

>160\_rnd-1\_family-150\_\_DNA

TTTATATGTNGGTCAGTCGAGATTAAATGTNAAATGTATCTCTTGTTCATGTCCCTCTCCACCTTGCAGACTG  
GTNAACGTTGCATAGTTTTTAAGTGCTCCCAAACTGTTCTAAAATCTCTCTGTGGCGGTGCGAGNGAGCGG  
GCGTGTTTTCGGACAGCGCCCGGTGCGCCAATCAGACGAACAATAAAAATGCCACCTTGTGAAAGTACA  
TAAGTAAAAGTACACATGACGATGAAACATGTTATTTACATATATGTATGTTTATAAGTTAAACGTGTTAT  
TTATATAAAATNAATACTTTAAATAGTTGTTAAAACATTCTACAATTTGTATTATTATCTGTGTATATATAA  
ATCTATATACTTCGTTTTGAACACTCCCGTTCTCATTGCCTGCGTTGGCTGTACTGACGAATTCAACTTTTC  
ACCGCACGCGAGTTGAATTCGTCCCCTGTACAGCCTCTGTGCGGAGCAATGAGAACGGGAGTGTTCAA  
ACGCACGCGAGTTGAATTCGTCCCCTGTACAGCCTCTGTGCGGACGCCTTAACGGCCCTTCGACGCCGAC  
GTCGGCTGCGGCGCGCATCTGTGCACACGTATGCAAGCGTGGTCTCACTGTGCGCCCGTCTGGCGCGCGCG  
CGCTGTACTTTTTTGTATCGCCGCTATATTCCCGATGTTCACTCTGTATGTGCGTCAACTTAGCGGCGGTGAC  
TTAGCGTCGATTTTTTGGTACTTGGTATCNGAAAAGGAATCGGTCACTTTTAAATGCATTTATTTATGTTTTT  
AAGCACAGAACCTAATAAATTTAAATGCAGAATTGCAAAAAATTAAATTATTTACTGCCTACATTCATTTG  
TTTTTGAATTTTAATTTATAATATGGGTAAACCAAGGGGTTNAAATATTAGGTTTCCACCATTCCATAAAT  
ATCCAAATTTAGGGATGATGGCCCCGAAAACCGCATATACACGATTAAAGCCTATAGTTTCACCTAGNCA  
ACTGTGAAAATTTGATTAAAATCGTCGGTACCATTTTTAAGATATTTGGAAAAGAGTGCAACAACCCCAT  
GTCAGCCCCATATAAAATGACCGCAAAAAATCAACCTTCTTATTTCTTAACTCAGAGACAATGGCCCTCAA  
TGCACGCTATACCCTCTTGTAGATACATATTTTAAGAAGCTTTAGGCACTAAATTTAAGTAAATGGACGGT  
ACAGATTTTCAGAAAATTAATTAATTGTAAACCAACCTCATATAGTTCATTTCATAAAGTCTATCGAACTGC  
TATTTTCTACGTGAACTGAATCACTGCCTGGCATCAGTGTTGAACAATTTTGTACAGAATTGGGCGGGGAAC  
CAATCCAATTTGAATAATATGTTATCATGAAAATTACTTATTGTTAACAATAAGTTTATAGAGCGAAATTA  
GACAGATTTTCAACTGGCAGATAATGTTAAGAATCGAAAAATTATTACGAAAAGTTTTAAGTTCGTAAGA  
AATATTAGAGCTTTAATATTTTGTATAACCCTTATTGGTGAGTTGTTTTACCCGTTTCAGGCTGCCTACTCA  
AAAGAACGCCAGGACGTATCTAGTGGTAGTAATCATGTTAGCAGTAACTAGAAATTAGCAATAATATTA  
GTGATATGTCTAGCATAGAAAATAATAATTCTAATTATAGTCTTAATGAGCCTACAAATTGTCCGTCTGAG  
TTTAATAATGACGCATGCTTTGTGCGAAGCGACATTAAAATGCTTTCGGAAAAAATACCACAATTTTCNTGA

TAGCTTAAACAGAGAAGTTCAGTTAGTTAGTAATTTGAAAGGATGCCGCGCAGCACTTTCAGGTTACAAC  
AATTTGGATACTGAAATGAGTATCCAAGAATTTATGGCCACGTAAATCAATTGTGTGCGATTTAAAAAA  
AAAAAAAACATTGAACACATTATTCGAGAAGCATACACTCTTCATAGCAATGCATGTGTTTTGCACTTTAA  
GTCAATTAGACTTAAACAAACTCTTTTGCTGCATATGGTTACTGCAAAGATCCATCATGCAACTACTTCT  
TGTTCCATGGCAGCCAACATATCTCCCATAACAATTGGCCTTAAAAAGTCAACGCAATGCAGAACAATAAA  
TAGATTTATAGAAAAGGCTTCCATTAGAACTCTTCTGCGTTCGAGTATAGATCAAAAAAAAAAAAAATAAC  
AAAATCAATATGTCTCGAGCCAGAGTTGGTAATGATCAGATTACTAATGAGAACTACCTTTTATAGAA  
ATTTAATTTTCGGAGGAAAATTGACTTTGACAACTCACGGATAAATCGTCCTTGCTTTAAGCCGTTTTTATT  
ATTTGTCTTTATAAACTATATTTAAGCGTTTNAAGAATGATTCTATAGGCCCATTAAGGCTCTTTTATT  
AGATTTATCAATAAAAGTAATGATAATATTGGTTCAAAAAGGTGCGTAAACAATATATTTATTTAAAATTA  
GATCCAGCATTCTGCACTTAAATAAATATTTGACGTACAGAAGTTGCTTTTATATTGTGATACAAGTTCT  
GTAACCTTCTGTACGTATTTCTTGAAGATTAAGTTTAAATGGACTATTTTCGGCAATGGACAGCAACGTTGG  
ATCATTGACGACTTCCTTACTTACTCCCAATTTTATACTGTCTATCAAATAAAATGTGGATGGCTCTTCACA  
ATATTTAGTAAAATAATTAGCGGCATCATCCACAATATTATTAACATATGGAGAAAGAAGTATTATTGCA  
ATATTTTCGGAACCATTTTTCTAATTTTCCAATATTATTTATGGAATATGCACAACCCAAGGCATTTCTTAAA  
AATGATTTAAGATCAATATTGTGCGAAANCAACTACTTCATCTATGTTGCGACACTTAATTTTGCTGTAGTG  
GCTCATACAAAACCTGAACCCACACTTTTGGAATGTGCGATTTAAATTATACAAAAAACTAAAACAAATT  
TCATTGTACGTTGCAAGATCAATGTTGTTATATTCTTTTAAAATGGCTCCAATTATTGCAAACTGACATC  
AGTTATAATTCTTTTGCAAATAGGCCATTTGAATTTATTTTTTATGCAAACTCGCGCAGCTCACATAGAA  
ATCTGCCTATATCTGACGATTTATGATTGGAGAGAATCGCATGTGCGACAGGAAAAACGATTCGAAGCTC  
TGGAATATAAGCAACCAATGAATATAAAAATGTACATTTTTTGATCAAGTTCATTGGCTGTACTACATTCC  
CAGTCGCATCAATATGCAGTGTCTGTCCATAAAAATATTTCTAGTTTCATAGAAAGTAAGTGAATAAAGT  
TGGCATAACACATTAGTAATCATATCGAAGGTATCTTTAAATGGATCTTTGTCAAATCAAATTTTCCATTTT  
CCTTCGAAATTAATTTTCTATAAAAGGGTAGTTTCTCATTAGTAATCTGATCATTACCAACTCTGGCTCGA  
GACATATTGATTTTTTTTATTTTTCTTTTTTGATCTATATTCAAACGCGAGAAGAGTTTCTAATGGAAGCCTT  
TCTATAAATCTATTTTTTCGTTCTGCACCACGTTGACTTTTTAAGGCCAATTGTATGGGAGATATGTTGGCTG  
CTTGTGTATACACTTACAACACCGTCAAATGTCCCATGGAACAAAACGTAATTGCATGACGGATCTTTGCA  
GTAACCATATGCAGCAAAAGAATTTTTGTTAAATCTAATTGACTTAAAATACAAAATACATGCGTTGTTAT  
GAGAAGTGTATGCTTCTCGAATANTGTGATCAATGCTTTTTTTTTTTAAATCACACACAATTGATTTAACGT  
GGCCATAAATTCTTGGATACTCATTTTCAGTATCCAAATTGTTGTAACCTGAAAGTGCTGCGCGGCATCCTT  
TCAAATTACTAACTAACTGAACCTCTCTGTTTAAAGCTATCATGAAAATTGTGGTATTTTTTCCGAAAGCATT  
TTAATGTCGCTTCGACAAAGCATGCGTCATTATTAACTCAGACGGACAATTTGTAGGCTCAATAAGACTA  
TAATTAGAATTATTATTTTCTATGCTAGACATATGACTAATATTATTGCTAATTTCTAGTTTACTGCTTACA  
TGATTACTACCACTAGATACGTCCTGGCGTTCTTTTGAGTAGGCAGCCTGAAAGGGGTAAAACAACCTCAC  
CAATTAGGGTTATAAAAAATATTAAAGCTTTATGATTACTTACGCATTTAAAACCTTTTCGTAATAATTNTT  
CGATTCTTAACATTATCTGCCAGTTGAAAATCTGTCTAATTTGCTCTATAAACTTATTGTTAACAATAAGT  
AATATAGATTGAAAATCAGTTGGACTTAAGTTTCCAAGTGGAGATATTATGCTTCTAGCAATGGCATCACG  
AAATCCAAGAGAGATTGTCCTTAAAAAATTGTTTATATATTAATGGTAAAATTAATCGAATAAGTTAAG  
CAACAATTTTATTATCTACCTTGCAGAGGGTATTATAATTTTGTGCGTGAATGTGTAACGCATAGAAGGA  
GACATCTCCGACCCCATAAAGTATATATATTCTTAATCAGCATCAACAGCCGAGTCGATATAGCCATGTCC  
GTCTGTCCGTTTGTCTATTTCTATGCGAACTAGTCCCTCAGTTTTAAAGCTCTCTTAATGAACTTTGCAGA  
ACTCCCTCTTTCTGTTGCACGCAGCATATATGTGAAAACCAGCTGGATCGGACCACTATATCATATAGCTG  
CCATAGGAACGATCGGTGCGAAAATTAAGTTTTTGTATGAAAAAACATTTTGTATTATCAAGATATCTTGACC  
AACTCGGCATTTATTAGTGTTACTTTACTCCTCATATATATTCANAATCCTATTAAGATCGGACCACTATA  
TCATATAGCTGCCATGGGAACGATCGGTGCGAAAATTAAGTTTTTGTATGAAAAAACATTTTGTTTTTCAAG  
ATATCTTGACCAAACCTCGGCATTTATTAGTTTTACTTTACTCCTCATATATGTGCAAAATCCTATAAAGATC  
GGACCACTATATCATATAGCTGCCATAGGAACGATCGGTGCGAAAATTAAGTTTTTGTATGAAAAAACATT  
TTGTTTATCAAGATATCTTGACCAAACCTCGGCATTTATTAGTTTTACTTTACTCCTCATATATATGCAAAAT  
CCTATTAAGATCGGACCACTATATCATATNGCTGCCATAGGANCGATCGGTGCGAAAATTAAGTTTTTGTAT  
GAAAAAACATTTTGTTTTTTCAAGATATCTTGACCAAACCTNGGCATTTATTAGTTTTACTTTACTCCTCATAT  
ATGTGCAAAATCCTATAAAGATCGGACCACTATATCATATAGCTGCCATAGGAACGATCGGTGCGAAAATT  
AAGTTTTTGTATGAAAAAACATTTTGTTTTTTCAAGATATCTTGACCAAACCTCGGCATTTATTAGTTTTACTT  
TACTCCTCATATATGTGCAAAATCCTATAAAGATCGGACCACTATATCATATAGCTGCCATAGGAACGATC  
GGTCGAAAATTAAGTTTTTGTATGAAAAAACATTTTGTATTATCAAGATATCTTGACCAAACCTCGGCATTTA





ACCGAAGCCTGGTAAGCCGCCCCGACGACCCATCGTCATACAGGCCGATTTGCCTCCTGGACACGTTAGGC  
AAAGTGCTGGAGAAGCTAATCTGCAACAGGCTTCAGGTAGCTGTGACAACAATGGTGGCCTGTCCCAA  
GCCAATTTGGTTTCACCAAGGCAAAGTCTACAATAGACGCTCTGGAGAAAGTGGTCGGCATAGCAACAA  
CGCCATCCAAGGATCGAGATGGAAAAGCGGCACAAAAAAGTACTGCCTCATCGTCACGCTGGATGTTAAA  
AACGCCTTTAACACAGCCAGGTGGGACAAAATATTGGATGCATTGTCAACGTTCCGCGTCCCATATTATCT  
TCAGGAGACGATACGCAGCTACTTCACTGGAAGACTGCTGCAATACGACACCGCAGACGGCCCCACTACA  
CATCAAGTGTCCGCTGGAGTGCCCCAAGGCTCAGTTCTAGGACCCCTCCTCTGGAACATCATGTACGATGG  
CATCCTCCGACTGGAACTCCCGATCGATACAAGTATCATCGGCTTCGCGGACGACGTGGCCCTTGTAGTCG  
TCGGCAAGGAATTGAAGGACGTAGAGGAATCGTGCAACCACAGTATTGACCGTGTGCACCAATGGCTGGC  
AGCAGCTGGACTCGAGCTGGCTGCTCACAAAACAGAAGCGGTGTTAGTCAGCAGTCGAAAAAGAGTGGA  
AACAGCGCACATAAGAGTCGGCAGTGCGACAATAGAATCAGCAAGGGCGCTAAAGTACCTGGGTGTCAT  
GCTAGACACAAGAATGTCGTTCAAAAGAGCACTTGGAGTACGTGCACAAGAAAGCAGCAGAGTCTGTG  
GAGCGCTATCCAGGATTATGCTGAACACACGGGGACCGAAACAGCAGAGACGCCGTCTCCTTATGACCGT  
AAACCGAGCGGTAAATAATGTACGCGTCCCCCATCTGGAGCAGAGCTATGGCTGTTCCAGCTACAGCCGG  
GGCGTACACTCTATATATCGCCTAAGCGCTCTACGGGTGAGCTGCGCATTCCGGACGGTATCGGACGAAG  
CGGCGCTGGTTATCGCAGGGATGGTCCCGCTAAGCGAACTGGCAACAGAAGCTGTAGTTTGTCTATAGAGC  
CCACGATGGAAGCAACACAGCAAACCTCGATCCGCACAGCGGCAAGGATGCAAAGCGTGGAACGATGGCA  
AGCACGTTGGGATCGCTCATCTAAAGGACGCTGGACGCATAGGCTTATCCCAAACCTTGGAAAGCCTGGATA  
AACCGCAAGTATGGNAATACTAATTTTTACTTAACGCAGCTCCTATCTGGCCACGGATGCTTCAGGAGCTA  
CTTGAAGCGATTTCGGCCACGATAACACAGACGAGTGTCTTGGTGCGGCAGTGGAATCGCAGAAAGGCTC  
CTCACTGTAGGAGGGAAAAACCAGCAGTGCGGCATATCAACCTAGATGTGAAAGATGATATTGCCAGGGT  
GAAGGTGATACAGATGGCAGCAACTGCTAAACTACCAAGTGAGCCAACTCCACTAGGAAGCCGACGCCA  
GCAGATCCGAGAAAAACCACACCGGCTAAATGTAGATAAACTCAGGATCACAGAAAAAAATCAGCTCACA  
AAAAACAACAACAGAGGGCCTGGAAATCACAAATGTTTAAAAGGCGGTCCCAAGAGGGGTTGAAGCCTT  
ACCCGAGCTAAGGAAAGCATATCGCAGAACACAGACGGCTACCATGCTTCTACCCAAGATCGCAGCAAA  
CGAACTTCTGAAGAAAGCGAAGAAACGCATTGGCTGGGTGTGTACCGTATATGCCAAAAATTGGAACCA  
AGAAGATGTTTCCAGTGCCTGGACCTTGGGCACACGGCTGCGCGATGCATTAAAGGTTTGCATATGCAAG  
CCAATGCATAATCTGCACAAGGCACGAGACTGCGAACACGGCAAACAACACCCTCAGCCATGCCTGCTCA  
TGGTTAATCAAGGCGTCTCAGGCAACAATCAAAAATTAAGTTAATACAAATTAACCTGAACTATTGCAGA  
GCGGTCCAGGACCTACTCGCTCAAACCTACACGGGAAGAGAACGCTTACTTCGCCATCGTCAGTAAACCAC  
ACCAGTCAAACATGATGGCATCTGGATTACAGAGCAACGGCGGCCAAGTATTGCGAAATATGTATATATAT  
ATATATATATATAGTTGCTATATTGCACCCAGCATAGGAATTACCGCGTTCGCCGATATACTG

>9\_rnd-4\_family-255\_\_LTR\_\_Pao  
CTTACATCTCCTTTCCCGTTGCCGTTGCTTCGTCGCTGGAAACTCGCTACCTTCGCTTCGCTGCTGCATTCT  
CGTTGCCGTTGCTTCGTCGCTGGAAAGCTCACGCTCTGNNTCTGNNTGTTCACTGCNTTTTGCTTCATCACTG  
CAAGCGACCCTCACATCGGTGAGCGCAACATTTACAAGTCTTAGCTGTTCTGTAAACAGTGGGAGCATTTG  
AACTGTGCTCGCTCACATTGGTGAGAGTGACATTATCAGGTTAAAGTTAGGCTGTGAAAATTTGGCAGT  
ATCAAANCTGTCNCTCGGTACATCGGTGATCACAACATTCTCGATACGTAAGCGAGCGATGTCTACTGA  
GGTCGATGGCAGTGAAAAAAGATTATCACACGGTGAGCTACAATTACGCTTGGACATGTTGGAGATATAC  
ATTAAGGAGGTTTTGGAAGTACAATCTGAAATTGAATTGGAAGATCCTCAGGACAATGGACGTGCAGAGG  
TGGAAGACACATATGTGAGTATCAAATTGTCCATCCAATCCCAACTGGATGATGTACTGCACAGCACCTC  
ATTTTCTAACCTGCTCCAATTCGCTCTTCGCCGCCATCGAGTCTTCCTCGATTGGCTCCGCCTGTATTTGA  
TGGGAAACGAGCAGAGTTTAAAAACTTCATTACATCATTCAATCAGATTATCGGTGCTGAGTACTCTCTT  
CGAACATTGAAAAGTTTAATCATCTGCTGAATTGCTTGAAGGGCCCTGCCCTACAGGCAGTAAAGGCATT  
CCAAGTGACTCAGGAAAATTATCCCAAGGCTCTTGCTCGTTTAAAGTGAACGTTATGACAATCCTACACTTA  
CATTTTTAGACACAATAGAATCACTATTCAATCTACAGCCAGTCGACAAACCGGACGGAAATCAGCTGCG  
CAGTCTGCTGGACAATGCGTCAGCCCTGTATTCATCATTATCGTCATTGGGTACCGGATCAGATATTGCC  
AAGCCATGTTGATATTCATCGTCATCGGAAAATGTGACCAGCAAACCTCGTAACAAGTGGAATGAGTCTCT  
TGACTTACGTACATTGCCAAATTGGGCTCACTGCACAACCTATTTTGAACGTCATTGTGAGTTTCTGCAAT  
CAAGCGGCATTGCATCGTATCGAATGGCTGATTCTTCGAAACAAAAACACGTGTACAAGCCTAGCAAGGG  
ATTATTCATTTGCTATTACTAATCCAACATGCATTGTTTGTTCAGCTCCGACCATAAAATTGTACAATGTT  
CTCAGTTTCAAGACATGAGTCTAAACTCAAGTACGGAGTCGTAAAAAATGCTGGACTTTGCATTAATTGC  
CTTCAATTAGGACATCGGATGGCTCAGTGTCCGTCTAACAATCGTTGTGCAAGCTGCAAGCATCGCCATCA  
CACGCTTCTGCATTTTGGCCAACCGCCTGCATCATCATCGTCTACATCGCCATCATCCATAGCGCAAATGT

CCTCAACAACGACTCCTGCTGCAACGCACTCGCATATGAATCAATCGCCAGGCGGACAAATAATTCTTGC  
TACTGCAAAGGTACTAGTGCGAGATTCATCAGGGGCGTATAAACAAGGCAGAGCATTGCTTGACTCATGT  
TCCCAAGTCAATTTTCATAACTGATCAATTCGCCCAACGGCTGCATCTACGCCGTGATAAGCATCATTTTGA  
AATCCGCAGCATAGGGGAGACCTCGACTAAAATTAACAACGTGTACAACACTGGAATTAAATCTCGTTTG  
TCACCATTGTAAGTAACACTACAGTTCTGCATAACGTCTCACATTGCCTACCAGCCGGATTTCGGAAATCGA  
CACCTCAGATTGGAGGTTGCCCCGGAATACACCCTTGGTCAGGTCGGATTGATCTCCTTCTCGGTACCGAG  
GCATTTTTTCGAATGCCTGGCTGTTGGACAGATTAAGCTCGGAGACAATTTGCCAGTCCTTCAGAAAACGTT  
GCTTGGATGGGTTGTGTCTGGCAAGTATCGTCATCAGTCAGCTAAGCAGTCATCAACGTGCTTGCTTTCTG  
TGGAGGAGTCAATTGACAAAAATCTTCAATTACTGTGGAGCATTGATGCTCTAGAAAATTCTCCAAAGTC  
AATCAATCCAGAACATCGGCTCTGTGAAGATATGTATTCAAGGACAACACAGATGAATAACGGCAGGATT  
GTTGTGCGTCTACCTTTCAAGGGAGATCCAATGTGCCTTGGCAATTCAAGCGATGTTGCACGTCGTCGTTT  
TTATCGCTCGAGAGGCGCTCAGTCAGCAGCCTACTGTTCAATCGCAATATGTAACCTTCATGAAAGAATA  
TGAGGATCTTGGCCATATGACTTTAGTGACGAATCCGAGATTAAGTGAGCCACACTTTTATATACCTCACC  
ATTGTGTGTTTTTAACCCAGCAGTGCATCAACGAAGTTACGAGTCGTGTTTGACGCCCTCGTGCACCTTCAT  
CGTCCCAGCATTTCATTGAATGATTTGCTTCTCGTTGGCCCAACACTCCAAGAAGATCTGTATATACTTCTCC  
TTCGTTTTTCGATTGGTTCGTTACGCCATCACAGCGGACATTACGAAAATGTATAGACAAGTTTTAGTCAGC  
CCAGTGGATCGGAAATTTCAATATATATTTTGGAGAGCATCCCCTGATGCTGATTTCGAGACCTTTGAGCT  
AAATACAGTGACGTATGGAACGGCCTCGGCCCCATACTTAGCAGTTTCGCAGTTTGCAATATCTGGCAGAT  
CTGCATGTGAACGAGTTTCCCATTTGGCGCATCCATTGTAAAATCATCGTTTTATGTTGATGATCTGCTATGC  
GGAGCAAACGAGCTCATCGAGTTGCAGAACATCAAACACGAGGTCACCGAGATACTTCGCCGAGGACAC  
TTCCCATTTGGTTAAGTGGCACTCCAATCATCCCGCCGTCAGGAACGACGAAATCGGTAAAGGATTTAAAC  
TTGGATGAAAACGCTGTCACTAGCGCACTTGGCGTAGCTTGGGATCAACGTCGTGATGTGCTACTATTTGA  
ATTTAAACCCAAAAAATTGTATTCAACAGTCACAAAGAGGACTATTCTCTCGACTGCGTCTTCTCTGTTCG  
ATCCATTAGGATTGCTGGCACCAATCATTATCGTCTCGAAAATCATCATAACAGGAGCTATGGCTGCTAAAA  
CTCGCCTGGGATGAATCTGTTCCGCAATCACTTCTACAAGCATGGAGAAACTGCGTAACGTCTCTCAAGG  
AATTGTCGTGATTTTCAGTACCCCGTTTTTGTGTTGCAAGCTGAGCTCACAGACATAACAACGACGCTTTC  
TGTGACGCATCAATACGTGCTTACGGCTGTTGCGTATATGTGCGTTCCACGGACTCGTATGGCAATGTCCA  
GGTTCAGCTTCTGACTGCTAAATCTCGGGTGGCTCCTGTCAAGAAGCTGACGCTTCCTCGATTAGAGTTAA  
GCGGAGCTCAACTTCTGAGTAAGTTATATACAACCGTCAAAAACATATTCATCGGCAAGCCGCACAGCGC  
GCATTTCTGGTCTGATTTCGCAGATTGTCTTGCACCTGGCTGCAACAACACTCTATCACCTTGTGACATTTGT  
TGGAAATAGAGTATCCATTATACAAGATCAAACAGCAGATGGAAAGTGGAGACATGTACCGTCAAAATT  
GAACCCTGCTGACATCGTGTACGTGGATGCCAGCTAATGAGCTCCAGCAATCAATTTGGTTTACAGGA  
CCTGCGTTTCTGCGTGATTCCGAGACTCAATGGCCCTGCCAACAATTCGACAATGATTTGGACATGGACAT  
CATCGATGCTGAAAAACGGAAGTCTACATTTGCTGCAATTATCGAAAGTAATTCTATTCTGGACTGGCTGA  
ACGGAAGTATGTTTATACATTCGGGCGCTTCGAGTTATGGCATATATGTTCCGGTTTTACCATATTGCCAAA  
AAGGAACACCCTGTGAAAGTTTCGCCGCCATGCCAGAAGAACTTCGCCACGCGTTGCACTGCATCATCA  
GGATCATCCAACAGCACTATTTCAAGGAAGATTTGCAATTGCTAAGGAAACAAAGAGATTTGAAAAGCAA  
TCTGAAATTTCTCAGCCCCCTTCATAGATGACTCTTCTGGATACGAGCTCATTAAAGGTTGGCGGCAGACTCG  
AGCATGCTGATATCCCCTCTCGTCAAAGGCATCCTTTACTTGTTCCTCAAGGAATCGCAATTTGTCCACAAT  
TATGTTTCGGCATCTTCACTTGCAGCAATTACCATGCAGGACCAAAGGCATTAGTTGGACTGCTGCGGCTTCA  
ATTCTGGGTCATAAACGCAAGAGCTTTAGCACGCAGCATTGTTTCGTTCTTGTGTACACTGTGTTCAGATATC  
GTCCAGTTCTACTTCGTCAAGTCATGGGTTCCCTGCCACCTGAGCGCTTATCCACAGACAAGCCATTTTCGC  
CACGTTGGAGTCGACTTCTGCGGTCCAGTGAACACCTATCTTCGAATACGTGGCAAGGGTCCCACAAAAT  
CCTATATCGCCATATATGTCTGCATGGCCGTAAAGGCCGTTTACATTGAAATCGTGTTCAGATCTTTCAACG  
AATAAGTTTTTTGGAATCGTTGAAACGCATGGTTGCCCCGTCGTGGACCAGTATCGCACATCTATTGTGACAA  
CGCCACAAATTTTGTGCGGAGCATCCAACAAGCTACTCGAGTTAAAGAAGTTTCATGTTCAACACTAGCACT  
CAAGATGCTATCCTATCATATTGTTCCCTCTGAAGAGATAACCTTTTCAATTTTCAATCCACCTAGGGCTCCACAC  
TTTGGCGGTCTTTGGGAGGCCGCTGTCAAGAGCGCAAAGAGTCTGCTGGTGCCTACCTCGCTAACACCC  
GGTTCACCTTTGAGGAACTGAACACCGCAGTCGTTGAGATAGAAGCAGTACTCAACTCTCGCCCCGCTGTC  
ACCGCTATCATCTGATCCCAACGACTTCAGCGCTCTCACTGCAGGACACTTTCTNAATGGAGATGCACCGC  
GCGCTTTGCCCGAGCGTGAGATTATCACCACAAACATCTCCAACCTTGGATCGTTACGAGCAGATCACAGC  
TGTTAAACAGCAATTCTGGCGTCGTTGGTCTGCGGAGTATGTGAACGAGCTTCGAGCCAGGACAAAATGG  
ACTTCGGCTTCCCCAAATCTCACAGTTGACTCTATGGTCATCATAACATGAGGACAACACACCGCCATTACA  
CTGGAATTAGGGCGTGTTGAGTCTGTTGTGAGTGGCAAAGATGACCGGGTTCGTGTGCGCATATATTCGC

ACTGCCTCTGGACTCTGTTGCCGGCCAGTACATAAGCTGGCCGTTCTACCTGTCTCTTGAAAGATAATTCT  
TTCAAGGCGGCCGGGATGTTCCGGTCATATACCTCATATATACATTAGTCAGGGTATCAATAGCAATGTCAA  
AGCAGATTATGTTAAGATTATGCTAATTCTCTTCTATTTGAATGTCATAAGCACTCATACACATGTACGAA  
GCCTCGCTCTCTTTCGAACTCTGTAATTGCTCGGTCCCTTTAATCTTAATTTATGTAAAGAAATCAGTTCTG  
TAAGCATCATCATAGAAGTCAGTCGTGTTGCTCATCAATTTGTAAAACCTTTATTAAAACCTTCATANCATC  
CACACACGCCCA  
>Ref\_dvir\_884  
AAAGTTAAAGTGAGTTGACGCGTTTGGACTGTTGCTTCGGGCTGTTTTTTGTTGTGGGCGGCAGTACGAGA  
ATGGAGCAAACCCGCGCACTCACCTGGATGACGGGATGATGGCGAGGACTACCTGATGGTATATATCCAA  
CCCTAAACCTGATCCAAGTAAGCAAGTTGAGCACTTTCTCAGCGAAACTATCATGGCGACATTGTTTATGC  
TCAAGCACATGAGCAAGACAAAAGCTCTGGACAGCTGGTTGGTTGTACAGTGCTGCCAACCTCAACCGAA  
GTACATGCGTCAACGAAAAAAGCAATTACGCGCGAAAGTATGCCACGCTGTGTGGGTATACATGAGGAC  
AAAGAAAGATATTGCATGCTTTTAGGCTTTCACGTTTTACTCGCATTGCAGCTGAAGACTCGAGGCAAGA  
AATTGTACAGAAGGCCACGGATCCGACCAAGTCAACTCCTGCCGCATAGCGGTGTACTAAAAAGGGGCGC  
TGGCGACCGAGCTGGAGCGGTTAAACTCCCATCTGTCAAACGCCAGTGAGAAACCATTGGCCACCGTTGG  
AGCCACAAATCAGCAGCGATGAGCGCCACAACCTGGCAGCACGCCCGTCAATGCAAGCAAGCAAACCTCCA  
CCCCCACTGAGCCCAGTAAAGTGTGGAAGCGACCCACTGGACCCCCCTTACGTAACTGTAGAAATGGG  
CTGACGAGTCGGGCATTCTAGGACCTTAATAGGCAAGCTGACACCTTGTGCGAAACGGCTCCTAGGCTAAT  
GCCTCGCCCCCGTCCCGCTAAACCTTGGCAGGCCTCGTAGAACGTTATCGTATGTGCGCATTCAAGTTGGC  
CGTGCAGGCTCAGTTGATATTCCCTGACTAGCACTGATCTGGCTCTGAACTCCGTTCTCCCATAAAGGACCG  
GAATCAAACCCCTCGCGGGAACCTCACTCCATGGAAAGGCAACCCCGGGATCGCGAAGGTGACTGCACAA  
TACACACGACAACAACGGCTTCGAGTTGGGACCCAATTAATCACAATGATGAACCGAAACAACAAAAGC  
ACCACCCCACTAGGTGGACAAGAGGAAGAAGGAGTATGCAAGGCCGACCCGTTTCGCTAGGCGATCATGC  
CTGGCGAGCACGCCCCCGGCTACACCAGTAAGGGCCCCCTCAGCCCACTGCACCATGCAGGGGAAATTGAAG  
AGAAAGAGACCCCGAAAAGGCTTAGGGACCCGGCCAGCCCTACGAACAAGCCACGGAGCACCCCGCCCA  
AGAAGAGCAAGGCAAATACCCAGGAGATCGAAGAGATTGGCTCGATACTGGACGAGCTACTGTTTCATGT  
ATCATGGCAAGCAGCCAGCGATGAGGCACATAAACTTGGCCACTAAGAGCATGCTAGCGAGACTAAAAG  
AGCTGCAAGAAGTAGTCAAAGCGCAGCTCACGGAAAACCTACGCATGCGATGCAGCGAAGAGTCCATA  
AGCAGATGAGCCATGCTGAAGAAAGCGCCGGAAGCAATTCTAAATGCGACACGGCAACGCAGACGGAAG  
AAAGCGGTGCATGCAGTAAACCACCGACAGCGGCGCAAAAACCGACGAACGAGGTTACAGGAAAAAATC  
AGATCTTGGCCCCAAGCAACTCCAAGCCGGCACCAACTCGCAAGCAGCAACGTTTACAGCCGGCAGAGG  
GCAAGGTACCGACCCAAGCGCGAGAGGCAAAAACACCGGTCAAAAATACCCGAGAGGTAAAAAATAAAT  
GGATTGAGGTGAAGGGCAAGCTCACAGGCGGAACAGCCCAACCGACCGGATGCGATCCTGATCACGT  
GTACAGAGAGCATGCCATACGCAGATGTGCTCAAAATGGTGAAAACAGCTCCTGCACTGCAGGCGCTCAA  
AAATAATGTACAGGGCATCCGCAAATCAGCAGCAGGAGAACTGATCCTCAGGCTCCAGAAGCCATCGGA  
CCCAGCTACCGACCAAGTTGCGTGTGGCAATCAGCAGCGCACTGGCTGGAAAAGCTGCCGTTAGAACCTTG  
CAGGAAACGGTGCAAATGGAGGTTCTAGATATCGATGAGTCCACGACAGCAGATGAGGTCCTCCAGCTCT  
CTCTGCCTCGGTGGAAGGAGACATAACAGTAGAAGCGACGCCCACTATGAGGGCGGCCAGATCGCATCGC  
TGGCCCTGCAACCGAGCCTAGCCACGAACTGCTCGAAACCGGCAAGGTCCGCATAGGGGTTTATATGCC  
GAATACGCCAAAAGATCGAGCCAAAGAGATGCTTCAGATGCATGGGATTTCGGCCATACATCCACCAGGTG  
CAAGAGCCAGCATCCGGTTGGAAGGAGACATGCTTTAAATGCGCAGGTACTGGGCACAAGTCTGGACA  
GTGCACGCATGAGGCAAAAGTGCATCCTCTGCCACAAGAATGGGGCACGGGCACTAACCAAGCCGCGCA  
CTCAACTCTGAGCAGGAACTGCCCCGGAGTATAAGAAGGCCTACAAAGCGCTTAGAAATGGTTAAGTTCC  
TGCAACTTAACCTAAACCACTGCAGAGCAGCCCAGGATCTGCTCGCACAAACGACCCGGGAGACGAGAA  
TTGATGTAGCCATCATTAGTGAACCGTATACACCCAAACATATCGGAGTGTGGCACGAAAGCCTAGACGC  
TGGAGCAGCACTATGGAGCTGCGGACAGGCACCATAACCAGCTCACTCAACGGATGGCTCGCAAAGGGTTT  
GCTAGGGCAAAATGTGGTCGCATATACGTTTATAGCTGCTACATAACCACCAAGCATACCCCTGGCAGAGT  
ACACAGCCATTATTGAAGACATCGCACAGGACGCGCACGGAAAAATCTCCAGTGATAATCGCCGGAGACTT  
CAACGCGTGGGCCACAGAATGGGGCAGCAGCAGAACGACACCAAGGGGAACCATCCTGCTGGACATATT  
TGCTTCGCTAAATGTCTGTCTGCTGAACATCGGCACAAGAAGCACTTACAGCAAAGCGGGTCGCGAGTCG  
ATCATAGACCTGACGTTTGCCAGCCCAGACGTTGCCCGAGACGCCAAATGGCATGTATCGGATGTATACA  
CCCACAGCGACCACTTTGCCGGTGATAACGGACACCTATCAACTTGGAAGCAGAGGCGCCAGTAGAAGGC  
TCCAACACACGGGATACAAGATGAACACTATGGACCTGGAAAGACTCCTCCCTATGGTAGAAGGACTTGG  
CATAAGAGGCGACGCCAACAGCTCTGCTGACGCGATAGCAGAGACTATCACCAACGCATGTGACGCTATA

CTGACAAAAGTTTCGCAAGGGTGGAAACGCACATAGACCGGTAGCCTGGTGGAAACGAGGACATAGCCAAA  
GCGCGCAAAGAGTGCCTCGCAGCTAGGCGGAAGAGCCAACGGTCAAGACCGTCCCCCAATTTTGAGCACC  
ATCTGCAGAACTTCAGAGCTAAGCGGAAATTACTCAAGGAAGCTATCAGACGCAGCAAATCCCGATACTT  
TCAGAAAGCTCTGCGACGCTGCGGACGCGGAGCCCTTTGGACTGGCTTACAAGCTAGTCATGGGAAGGCTA  
TGCAGGCAACCAATGCCAACAAACCCGGAACAGCTCAAACAAATAGTCCTAACGCTCTTTTCTCGACAGA  
CACCTGGAATTGCACCGCAACTACCAGCAAACGGAATAAACGACTGTGCACCCACCGACGACAATGAGG  
TACTGAGCATTGCTGCGAAGCTAAAGGCCGACAAATCTCCTGGACCAGACGGAATACCGAACGGGGTAAT  
AAAAGCTGTCAATTACTGCACAGCCCAGAAGCTTCGTGGAGTTGTACAATCAATGTATAGCGGAATGCACA  
GTACCACGTAGATGGAAACTCCAGCGACTTGTGCTCATCCCGAAGCCCGGCAAGGAAGTATGATCCCT  
CCTCATACCGCCCCCTGTGTATGCTGGACACGATGGGAAAAATATTTGAGCGGATAATATGCAATCGCCT  
AGAATGCAAGCTTGCTGAAGTGCGCGGTCTGTCTGAACGACAATTCGGCTTCAGGAAACACAGGAGCACC  
ACGGATGCCATCAGGGCCGTGGCTGAACTAGCAGAAGACGCTATCCAAGGCACAAGATGGACAGGTGGC  
ACCAAACAGTACTGCCTAGTCTGTACGTTGGATGTCAGGAACGCGTTCAACTCAGCCAATTGGACAAAAA  
TACTAGAAGCGCTAACGGCCAGACACATCCCGAGCCAATAATAAAGTTAGTGACCAGCTACTCCAGGAC  
AGAGTGCTAAATTACGACACAGAAGACGGCCAACGACAGTACAGGGTAAGTGGAGGCGTTCCTCAGGGC  
TCTGTTCTCGGGCCGCTACTGTGGAACGTCATGGTACGACGGGAGTACTGCGCCTTTGCCTACCAGAGGGC  
AAAACAATCAATGGTTTCGCCGATGACATCGCTGTTGTTACTGTGGCGAAGAACTCGATGAGGTCACTC  
TTAGGAGCAGTGCGGCCATCGACAGGATAATTGACTGGCTATCCCAGAACGGACTCACGCTAGCGGAGAA  
GTCGCTTAATAAGCAGCAGAAAGATAGTTGAGACGACATCGTTGCGCGTTGGCAGTGCTATCATTAAAGTC  
CAAGCCCGCCATCAAATACCTGGGCGTCATGATAGACCACAGACTGTTCGTATAAACAGCACCTGGAGTAT  
ATTAGCCACAAAGCGGCCAGTGTTACAACAGCCATTAGCCGAATGTTGGCGAACACCAAAGGACCAAGG  
CAGAGGAGCAGAAGGCTAATCGCTGGAGTGGTGACGTCCACAATCCTCTACGGATCCAACATATGGGCCC  
CCGCAATGGAGGTTGCATCTTACAGCCGAGGATGCAATGCTGCATACCGACGATGTGCATTGCGTGTAGC  
CACCTGCTTCCGCACTGTATCGGAAGACGCGGCCTTAGTACTGGCAGGCATGATCCCACTCGGCCTGATG  
GCGGCCGAAAGGCAAAGTGGGGCAACCACCAACAGGCAACTGAGGGATAACACCATCGAACAATGGCAA  
AGCAAATGGGATGCGAGCTCAAGTGGCAGATGGACCCACAGACTAATCCCAAACCTGAAGCTTTGGCTAC  
AGCGGCGACACGGCGATGTAGACCACTACCTGGCACAAATATTTACTGGGCATGGCTGCTTTAAAGCGTA  
CCTGCACAGGTTTAATCATGAGGACGACCCCTTTTGCAGCACTGTGGGTACGGTGTGATTGAGGACGCG  
GAGCACGCATTGTTCTACTGCCCACTCTATAGTCGCGAGCGAGACAAAGCGACGGCGGGCAGAAATGATT  
TGTCTCCGGAGAATCTCGTGCGCGAATGGTGGCCACTGAAAATGGATGGACAGCCGTTGCTAACATGGC  
ATCGGCTATAATGAAGGAGCTGCGACGACAGGAGAGGATCCGACGCGGCATCGACTGATGAGCGGCTGA  
TATACAGCCGTACCCCGCCCTGCGAAGTAGTACTTTGCGGTTGTCCCGCAGGAGCGGGCTACAACCTTTCTA  
CTCCCCACAAAATACCCTTTTCTTTGTTTGTCTTAGTTCCCCCTTGTAATAATGTTAAGCCGTTATTTTCT  
TTTCTTCCAAAATAAAAAAAAAAAAAAAAAAAAAAAAAACGAAAAACACACACACACACACACACAC

>160\_rnd-1\_family-75\_\_LTR\_\_Gypsy

AGATAGAGGTCAACAGCAGGGGGATCCGCAACCCAGCGGTTCCAAAAATCCTCACTTCACTAAACAACA  
GAAACAGCAACAAAGTCAATTTGAGCAACAGAGTGGCAGGTGGAACAAAGGTGGCGGGTCAGAGGAACC  
AATGGACGTGCATCCATCTGTGTCAAAAATTCNACAACCATCGCNGCACCAGCCTACGTAACTCTAGCG  
CTCCTCAAGCCTACAAAAGAACGGCCACGTCTGGGCGCTTAAGCGGACAGAGGAGGCAGAGAGTCAATC  
ACACAGCTCACGAGCCGGATCAAGATTCAAGTTTCGTATGCTAGCTCTGCAGCAGCAGCAGAACAGCAAAT  
TGCCGACGACAATGGTAGCGGTTATGACTCAGACACTCTCAATTTTTTTAGGGGAAGCTCCCTGCTGCCCTA  
CATCAGTAGGAGAGTAGCAGGGATCCAGATGAGGTTTCTCATCGACACGGGCGCTTCCAANAATTATATC  
AGGCCACATAAAAATCTAAAAGGTGTGTGCCAGTAAATTCTTCTTCTTACCCATTCTATACACGGCAC  
CACGAAGATCACTCATAAGTGCCTTATATCTCTGTTTCGGCAAACTGCCACATTTTTTCTTACTCCCAGACC  
TGTCACATTTGATGGAATTGTGGGCCTCGACTTGCTCACGCAAGCAGGAGTTTCGCTTTGTCTTTCTTCTG  
GCCAACTCAAATGTGGCGCAGAACTGAACAAATCGAATTCACAGGTGCGCGGATGTAACTTTACCAA  
TGTTGACTGCGCCGACGCGCCCGAGGCCGTAGCGGATCCGGAAGAAGCACTTCCCTATAACACATCAGTG  
GTGGCAACCATCAGGACCACTGATGAACAGCCAGTTTATTTCCGACTGTACCCCTACCCCATGGGAGCAG  
CGGAATTCGTTAATAAAGAGATTCAAAGCCTTCTGAAGAACGGTATCATCAAAAAATCTGTCTCCCCCTA  
CAACAACCCCATTTGGGTGGCGGACAAGAAGGGGACGGACGAGTTTGGTAACAAGAATATGCGCCTAGT  
AATGGATTTTCGCAAACCTTAACGAGAAAACCATCGCAGACAGATACCCTATGCCTAACATTCCAATGATT  
TTGGGGAATCTTGGCAAAGCTAAATACTTTTCGACATTTGACCTAAAATCCGGCTATCACCAGATCACGCT  
AGCAGAGCGTGACCGTGAAAAAACAGCCTTTGCAGTTAACGGGGGGAAGTACGAATTTTGTGCGACTTCCC  
TTTGGGTTGAAGAATGCGGCCGGCATCTTCCAAAGAACTGTTGACGACGTAAGTACGAAATTTTGTGCGACTTCCC

AATCTTGCTATGTCTACGTTGACGATGTCATCGTCTTCTCAAAAGACGAAAGTTCTCATGTCCAACACGTA  
GAGTGGGTCTTAAAGAGCCTGTACGAGGCAAATATGAGAATCTCCAAGGAAAAATCGCGTTTTTTTAAGA  
AAAGCGTAGGTTTTCTTGGTTTCGTGGTAACCAAGTAATGGAGCTACAACGGACCCCGAAAAAGTCAAAGC  
GATTCAGGAGTTCCCAGAACCAANGAATATATTCGAGATCAGATCATTTTTAGGACTGGCTAGTTACTATA  
GGTGTTCATCAAAGACTTTGCCTCAATAGCAAAACCCATTTCTGATCTTCTAAAGGGCGAGAATGGGTCA  
GTAAGTAAACACAGATCGCGAAACATCCCGGTAGAATTCTCTGAGATTCAGCGTCACGCATNCCAAAAGC  
TACGCAACATTTTGTTCATCAGAAAACGTCATGCTCAGATACCCTGACTTTAAGAAGCCGTTTGATCTAACG  
ACAGACGCTTCAGCTTACGGCATAGGGGCAGTGCTTTCTCAAGAGGGTCGCCCATCTCAATGATTTCCAG  
AACATTGAAACCCCGGAGGTGAACTACGCCACCAACGAGCGGGAAGTTTGGCTATAGTTTGGGCCCTT  
AGCAAGCTACGTCACTACCTATATGGGGTAAAAGACATTAACATTTTCACGGACCACCAACCNNTAACTTT  
TGCCGTTTCTGAGTCAAACCCGAACGCCAAAATTAAGAGATGGAAGGCGCGCATTGAGGAAACGAATGC  
GCGAATATTTTATAAGCCAGGCAAGGAGAATTTAGTTGCTGATGCGCTATCGCGACAACAGCTCAACACT  
CTTGACGAGCTGAATACTGATTCCTGCGCAGCCACAGTCCACAGCGAGCTGTCCTTGACCTATACAATTGA  
GTCGACCGAAAAGCCACTTAATTGTTTCCAAAATCAAATTGTCATTGAAGAGGCACGCGTCCCCACCAA  
CGAACTTCATTCTTTTCGGGGACAAGAGGGCGTCATGAAGTGGGCTTCACTGATCACACAGCCCCTTTGGA  
TGAAGTGGCTTGACTTGATTAATCCAAATGCGGTCAATGCCCTCTATTGCAACCTGCACACACTAGCACAGG  
TGCAGGATGGCTTAGTTCGCATGTTTCCAGGCACAAAGTTCTGGCACTGCAAAAACCGAGTTGCAGATGT  
CTTCAACGTTGACGAGAGGAGAGAAATTCTCGTTGCCGAACATAATAGAGCGCACAGAGCAGCTCAAGA  
AAATGTTAAGCAAGTGTTATCAGAATACTATTTCCCTAAAATGGCGAAGTTGGCTAAGGAAATTGCGGAA  
AGTTGTAGAATCTGCTCAGCAGCCAAATACGATAGGCACCCGAAAAGACAGGAGCTGGGAGAAACTCCG  
ATCCCTGAGACTCCTGGGGAATTTCTACACATTGATATTTTTTCCACGGACAAAAAATTTTTTTTGACCTGT  
GTTGATAAGTTCTCTAAATTTGCAGTCGTACAACCAATTGAGTCGCGCACTATCGGGGATTTAAAAGCTCC  
ACTACTGCAGCTCACGAATTTCTTTCCACGAGCCAGAACAATTTATTGCGACAACGAGCCTTCGATGAATT  
CTCAAACGATAAAGACCCTGTTGTTAAACAACATATGGAATCCATATTGTTAATGCGCCGCCGCTGCATAGC  
ACCTCCAATGGCCAAGTCGAGCGCTTCCATAGCACTCTAGCCGAGCTGGCACGTTGCCTCAAGCTGGAGA  
GAAACATCAGTGACTCAGTCGAAGTCATAATGCTAGCCACGATTGAGTATAACAAGACAATACATTCCGT  
CATCAACAAGAGACCTGTTGATGCCCTCCATGTGCCCTCAGGCGAACCCGAAAAGGGAAATATCAGCAAAG  
TTAAGAAGTGCACAAGATGCGCAACGGGCTAGGTTGAACGACCAGCGACAGAATAGAGTCTTTGAAGTA  
GGCGAAAAAGTNCTAGTAAAAAGAAACCGCAGGCTTGGCAATAAACTCACGCCCTTATGTGAAGAACGG  
ATCGTAGAGGCAGANCTTGGTACGACCGTTCTCATTGGAGGGAGGGTGGTCCACAAGGACAACCTTAAGT  
AGGGCGAGAGCTNAAATAAAACATCGATTNTATGCATCTTGAATTTAACTATAAGTTTCAACATTTGNGC  
CACTAGGCTTCACCTTCAAGTTTAAATTTACGCCACTTGGCATTNCCTTTAGGAAGACACGTAATAGTT  
TGGTCCGTTTTGTCTGTCTTCCGCAGGTTCCGGGTTTCTGCTATTTCTATTTTTTGCAAGTGCGGCAGCGCGT  
GTGACTAATTACTCACACGCCAAGTATATTCCCATTGTTGAGGGCCAAGTTCTGGTCTGGGAGGAATTCAA  
TTTCGTCAGGCACACAGCAAACATCTCTGGGTACGAGAAAATGGTAAGCGAAACAATGGAGCTATGTGAA  
ATGTTTCCGCAGTCACACATGAGAAAGCTTCTAAGCGTAGATGCGTCCCACCTCAGAGATCTGTTAGAAG  
CTCTTGGCGTGCACCACAGGGTGGCAAGAAGTTTAGATTTCTTGGGCACAGCCCTCAAAGTAGTTGCGGG  
AACACCTGACGCCAGTGACTTCGAGAAGATCGAATTCAGTGAATTACAGTTGGTGAAGTCTAACAACCGA  
CAGGTAGCTATCAACACAAAAGTTCAGGAACAAATCAATCAACTCACTACAAGTGTCAACACATTACTAA  
AAGCTGCAAAAAAGAATCAGATAGATTCCGGGCATTTATACGAAACTCTTTTAGCTCGGAATAGAATGTT  
GCTGATGGAAATGCAGAATTTGGTGCTCGCTGTTACCCTTGCAAAAATTAATATCATAAGCCCANATATAT  
TAGATCACGCAGATTTGAAATCTGTTTGGGTCGATGAACCCACAGGTAATTCAATAGCTGACCTTATGTCC  
GTTGCGTCCGTGAAAGTATTACAATCTGTTAATGCCCTTCACTTTATCATTAAAGTTCCCGAAAATCAAAT  
GGCTTGACAGAAAGGTGATGCTGTATCCAGTTGCACATGAGAATGCTGTGCTACAAATTGACGACAACATT  
ATAGCTGAGTGCGGAGATCAAGTGCTTGCCCTTAAGAATTGCGCTTCCACGCCGGGAGGAACCTTTTGT  
AACTTTCACCGACCAGCTCTTGTGCCAGAGAGCTGCATGCTGGTGGCTTGGCAAACTGCCAAATGCAGCC  
GAGTCACTTAGACCCGATCACATGGGTCGATGACGGAATTCTGATCATCAATAACCGGCCTGCTAAAGTT  
TGCGCTGACAACGGTACTGAGACTTGGGTTACGGAACGAATCTAATCACGTTCAATAATTGGGCTCTGA  
TCAACGAAACTAAGTACTTGAATCGCAACAACGTCCAGAGTAAGTTCCCCGGCATCGCGGCATCTCCCT  
TCTGAACGTCACCGGCCACCAAGACGTGCTGAGTCTCCCTTACCTTCATCGCTTGAATGAACGTAACCTGG  
AGATCATCAAGGAAGTCAAGGACGAAATTGGAAGCGTCGACAGCGTGGTAATAGCCTTCTTGTGGGTGC  
TGTGTGTTGCACCATAATTTGCGTCGGAGTCACCTACCGTCGGTTCACCAAAAACATGGCATCGGCCAAG  
GAGATTAAGAAGGTGATCGCCGAGATAGGAGCGGCCGAGGGCGGCCTTAAGTTAAAAGGGGAGCAGTTA  
ACAGAGGCCAACGACACCAGCTCCAGATGCTGATATAGCACTGGGCCGGATGTTCTTACGAGTCTAACAG

GGGTCAGCAAAATGCAACATAACACCAGCCGCAGATGCTGACATAGCTCTGGGCCGGATGTTCTTGCACG  
ACGGCAGCGCACGAGGGCGCAAGCTAAGCATTCTAGCGGCCGTTGTGAAAAGCACACAATAGCTTAGGTA  
NTTTTGATCAATCTTTTGTAAATTTAGTTTTTAATTCGGCTTTCCTGAGGCACATCGGCCAGCGACTTCG  
CGTATAAATTAACCTACTACTACGGCGTATCGGCCTAGTGTTTTATAAACCATATAATTAATTAATTTT  
GTGTTTCTAAATAATCAAATAATCAAAATAAAGTCCTATAACGAAAATCCGCGAGGACTTNTTATTTAAAT  
ATTAATTTGTACACACACATTCATGCGCGTCTGCTTCGCATTCTAACAGCATGGTAATGGCGACTTTTTTCT  
GCAATGCTATTTNAGTNCCTTTTTTATCATAAGTACCTAATTATTGGTGTGGCTGCTGAGTAGAGGTATAG  
CAAGTGGTGCGGTCTGTCGCG

>Ref\_dvir\_99

GTATTACCTCATTTGAAACTTAAGGGAATTTTTTATTTTATTGAATGCTTCGATCGCTTCTTCGTTGAGATT  
AATGAGCTTTTTAAAGAGAGGTTAGGGGCTTTGCCAGCTTGTTGTCTGAGATGACAAATCCCAGGAATTCT  
ACTCTGCTTTTAAAGAACTCGCATTGTCCAACCTGACATTTTCATGTTGGCTTCTTGTAGAGTTCTGAATATG  
GCGGCAAGGTGCTGCGCATGCGATTTCATCATCTTTGCTAAAGATAATGATATCGTCAATATAAATGAAGC  
ATATTTTTCCAATATGCTCACGAAGGATGTCGTCAAGAGCTCTCTGGAAAATTGAGGGCGCATTCTTGAGA  
CCGAATGGGAGTCGTGTAAACTCGTATTTTCCGTTGTTAACGGAGAAGGCAGTTTTTCTATGTCTGACTC  
CTTAAGGGGTATTTGATGAAAGCCACTTTTCAAATCTAAGACAGAGAAAACCTTTGTTATTGCCTAGCTGTG  
CTAGTACCTCGTTGATTTTCGGGTATAGGGTATTTGTCTGCGGTAGTTTCTTTATTTAGTTTCTGTAGTCTA  
TAACCATGCGATATTTCTTTTGCCCGGAGGCATCTAATTTTTTCGGAACAATCCACACAGGTGAATTGTAT  
GGGGATCGGGAGGGTCGGATGATTCCGTCCTCTAAAAGTTCTTTGATTTGGCTGTGTACTTCGTCTTTTAA  
AGACATTGGAAATTGGTAAAATTTTGAATATATGGGGGAGTCGGTTTTTGTTCGAATCTCTGCTCTGACGT  
TGGTTGTGTATGTCAGTTTTTCGTCCGGATTGGCGAATAGGTGTGGGTGCATTTTAACTAGTTGATTAAGG  
CTATTTTTTTGTTTCGTTTGTTCATATGTTCTGTCCGTGGTATTACCGTGTGACCGCCTCTATTTTTTTCTGCTT  
AATGGGTATGCAAATATTGTTCTTGATTATTAGTAGATTCTTGCTGCTTTGTATCACAGCATCTAGTTCCTT  
TAGACTATCGTTACCTAATATGGCGTCGAATGATTTTAGGGTGGGTAAAGAGAAAGAATTTTATTTTTATAT  
CGTTTCTATTGAAAAGATTAGCGAACTTGTGGTGTGTAATTTTAAATGCTTCCGCCGACTGTGACGGCTTCG  
AAGGGTTTTTCGTTTGGAAATAGGTTTCGGACACGAATTTTGGTTGGACGTAATTTTCGGTTTTGATCCTGTATCT  
ATTAGTATTTTGAGTAATTTTCCGCTCCCCATCTTACATTTCTATGTAAGGAAGAGAGGAGCTCTTATCCT  
AAAAAATTAATGTCTGAGTGTTCGTATTGGGTATTTTGTCCGTCATCTGTTTCTTCAATTTGTTGGGCGTAT  
TCGTTTAATGGCTGCTCGTATTCAGTCTGCTGTTTCGTTAATTTAGCATTGATTGTACGTATTCCTCCATAGT  
CACATAGTTGTCGGTGTTTTTCTGTCTCCGTCTGTTCTTCTCCTGTTTGTATGTTGAAATTTCTTTGTTTTTGT  
CCGTGGCGTTTTGTTGGTGGTGGAGGTCTTTTCCCTACTTCAAATTTGGGTCTGTTTCATGTAGTTTATCATCC  
TCGTGCGGATGCTTTGGTCCACGTCCATTGGCTCAGGACGTGGTTGGGGTTTTGGTGCAGAAGGTCTATTG  
GGTATGTATACCTGTTGTGGTTGTGTCTGGTAGGTTTCGTTGGTTGGGATATTGTGGAATCGGTCCATTATTG  
TTGTAAGTCGGTGGTCCATGGTTTGTATTGGTTGGCCAAGGTGTATGGATCGGGAGTTGGGGCCTGAAGCT  
AATGGGTGGTGGCCTAAAAGTTTGAGCGAAAGAAGGCTGAGCTGTTTCGAGGTGGCAGTGTAGGTGGTGGT  
ATATTTCTATTTGGGTTTTCTGGCATGTGTCTGTTGATTTCTATTCAAAGCCATGTTAGTGCATAGCTTTGA  
TTCTCTAGTTTTAAACAATAGTGAAGGGCTGAAGGTAGATCTGCTGGCTCCTTTATTCCAAGAATCCGTGG  
TAAATCTCCCTTCAAACCTCTAATGAAGGTATCTAATGCTTTATCTCGGTATATTTTTGTCTATAAGGGTTTC  
GGATTCCCTATTTAATTCCATGCAGCCTACTTTATTTAATATCAGCGACAAGTGGTTGTAAACGACCTGGT  
AGAATTCTTCTACTGTTTGGTTGTTACCTTGCACTAACATTGTCATCTGATATTCTAATGTTCCCAGATCTC  
TTTTGTCTGCGTAGTGCAGCGTGAGACATTTGGAGATAGCGCTCCAATTTAGGGGAACAATTATACGACTC  
GAGGGCCGTGTCGGCATTGGCCAGTGATTTTGTCTTCTACTGTATGCAATATGCCAAAGTATTAACCTGCC  
TCAGCTGCATAGGCTGAGAGTATACGATCTACACTCTTCTTCCATGAGCTAAATTCCGCTGGATTACCGGA  
GAATTTCTCTGAGGCTTTTAACTATGTCCGGAACCTCTGTCTAAGTCATTCAAATTGTGGTTGGCAGTTATTGT  
TTGGTTCGTCTACGTCATAAATCCCTAGAGGGGTTGACTAACTGCTTTACCAATGTCGGCAGTTGTTGTG  
CCAAAATCTGGCTAACCCTGGCTGCTATTATCTGTTCTGCGTTATTCGCCATGACTCTATTTTGTAAATGTT  
CGTTTTGTCTGTCTGATATGTCGTTGTTGCTGTCTGTTTCGAGTTATGTCCGCCTACCTGTGGTTGATCTGATA  
CTATTGGGGGCCTAACTAAATTGCTTTTATTAGCCATAAACGAGATATATTACTTATATTGTATATTTTAA  
GATATTTTTCGAAGTATATTTAAATCTAGTGTTAGTTTTTTTACTCTATATTTTACTTGAATTTTTTGATCGTTT  
TGTTTTCTTTTTTAAACCAGTGGCTGGTTTTCTTCTTCTACTTTGGAGGGTCCCTTGGGAGTCGCAAAGTTG  
GAAATAATTTATACTACGTTTCGTAGTCTTTATATTTGTTTATCGTTTTACACTTTTTTATCTTGCTTATCGTT  
CTACAATATTTAGTATTTATTATTCTTATAATTCTATTTCACTTTTGTGTTAGTTGTTTTTTTTTTTTTTTTT  
TTTGTTCCTTAAATTTCTAAGTACTATTCCTGATGTGGCAACCTCCCTGCCGGTCCGGATTTCAT  
TCCTTTTTGAAGCCTTTGGGTATCTACTGGGGATCCTGCGACCAGTCTTTGTTGAGAGTATCCTGCGGGCG

GGCCTTACAAGATGCGTTGTCCACCGATGGGGCAAATTGAACAATTAAGTTCCAATTGCCTTTTCGCGAATT  
TAACCAATCGTTGAATTTAATCGACGAGAGTTGCACTGGTTTTATTTTCGCGTATAACCGACTAACGCGTA  
CGTAGAAGCGTTTTGTTCTGTTGTAACACGAGCCGGTCCCTGCTCGGGCGCCAGTTAATTCCAAAGTTTAT  
TAAACGATGAAAAAAATATAATTTTTAGGGAAAGCAAGACTTCCTTTATTTGATGTTAATTTGCAACTGAAT  
AAACTTAAATCAATTCTAGCCCTAGTAACCTGTGGCTTAGCGGCAGCGGCGTTGGCAGCGGCGTTCGCTGC  
TGATGTTGTTGGCCCGTTGGGCAATTCTTCTTGGAAATTTTCGGGCGGTGCCAGTCGGCGCGTGGAGGAAAT  
GGCACAGACACCAAGTCAGCATTTTGCTGCACTTCTTATGAGGTGTTGCAATGCTTCTTATTGGGACTGTA  
TGAATTTATTTGTTGTTAACTCTTCCCCCTTTGATTTAAGCTTGTCTCAAGCGATCATCAGAAGAAAGGTA  
TGTGTTGAACCTGAGGTTGTTGGCATCTGTATTTTGTATTTGGATATGTGCTGGTTCTTTTTTTGGGTCTCTC  
TTGTTCTTTGTTTCAGTTGCAGTATTATATTTTTCTTATTTTTCTTCATTACGTGTAATACACAGGTAAGAAG  
GATGGCAACTGTGAACAGAGTTATGAAACCGACTCTATTTGCTATAGAGTGCCTCTGAAGTTTTTGCAATGT  
TTTTTATGTTGTTGATGTGCAATTCCTTCTAATGCTTCCAGAGAAAGAATCTTTATTCTTTTCGTTTTCTATTGG  
GGTTATTTGTATTGTGGGATTTCCCTGGGGTCATGACGGTGACCTCTAGGTTGCTGAACTCTTGTGTTGTGAT  
GAATAAGGTTTCGTTCCAGAAGTTAATCATGTAGGTGCCTCTCACGCGTTTCTTCTCTTCTTGCCATCTAAT  
AGTGCCGTTGAAGTCGTTCACTAGTATAAGTCCCTCGTCGATTTCCCTCGATCTCCGGGATATGATCTGCAT  
TGCTAAAGCCACAGAGCGCTTGCTCTCCGCTAACTAACTTAGGTATACAATTATTAATTGTTCAAGTTTAC  
AATTTTTGATTTGTTACAAATTTTAATATTATGGTATCTTTTACAATTGTTGTTTATGCCATAGATTGTTTTA  
TTACAATGAAACAGTTCGTTAAATTCTAAATTTATTATATTGTTGTTTTTCACTACTGGCTTTATTATAGTA  
TTTTTGCAATTCATTTCTTCTAAATTTGGAATTTTTACAATATAAAACAGAGTGGTTCCATTATGCAAAATG  
GATACATCTGCGAATTCTAGCATTTCTTCAATATTTAAAGGTGGCATGTTGCTTTTATTAAGTTATCGTTT  
ACTATCTCTATTTCCCTTTTTTCGCCAAGTAGGAATTGTATTTATTAATTCATTTTCGCCCAATTGTATGGCG  
TACTTAATATTAATTATTTTCTTCTTTTATGAGCCTAATTTGATTTTGTAAGCTAATAGCTATCTCATCACTT  
ATGAGAGATTCCTTTCTTATGCTATTGGTTAAATCGTTTGAGATTTTCGTGAGTTTATTAATTCGATCTTCT  
AATTGCCTGTTTATGATAAGCTGTTTATTGTCGTTTTCTATAAGTTTGTTTATGTTGTCAGTAAGCATTATT  
AAGTCGTCATTGTCCGGGCTGCCGGCTACATACTTCCAAGCTGTGCCTATAATGTTGATCGCTCTAGTCTTT  
CGTTTATGGAAAAGTGATATTGTGTCGAAAGTGACAATAGCTTGCGTTATTTTCGTGACGTAAAGTGTGGTA  
TAAAGTATTGGTTGTTAAGTCTTTTTTCGGTGTA AAAAAGGAGATTATCTAATGCGTTTTTAATCTGTTCTAG  
CTCTATGACTTGTACGATTCGTGTTGTCGATGTCTGTAGTTTCCCTATTCCTTTTAGAATTGTAATTGTTTGT  
GCGTCTGTGTAGTTCAAAATTTCCAAGTGTCCTTCTGTTGCTTTTATTGTCATCATTAAATAGGAATCTGTAA  
TTTTTATGTATTTTTTATATTGCTTTTATGTATTATTTTGTGAGTTGTTGTTAGTACGGTTGTGTTTCTATTTT  
CTTTAACTATTTCCCTTTTTGTATCTGGGTGACAGTTTGGTACCTAATCTGGTATTGACTTTGACGAATATTT  
CTTGACCAGGTATGTAAGTTCGTATGTCGTTACGTTTTTTGTTATGATTCTGCATGTCAGTCGATTGTTTCT  
GTTTGAGTCTGTCAATGTTCTCCTTCCCTAGCTTTTTTCGTATTGGTTCTGGGTCCGTAGTCACCATTCTGCCC  
AAAAATATATCTAATGGTCTCCTGGTAG

>9\_rnd-1\_family-350\_\_LINE\_\_R1

ACACACACACACACACACACACACACACACACACACACACACACAGNGACGACGAGATTGT  
TTTCATAGAGTGCGGACGCGATTTGTAAGTCTCCGTGAAAATAAACAAATAAACCTGTGAAATTAAGT  
GAAGTTAGTGACGTGTGCAGGGAACCGAGACAGGCCTAAGACACCAAAGGTGCGTGGTGGTACTCAC  
TGCGAAGCCCGTGACAGACCATTCCTGGGGTGGCGTCTACAGTTCCACGATCCAGGCGAGGGGAGTGGAGG  
CGTCTACTTGGCGTGTTTGTGCGCTTTTTGTGAGTTTTACCACTCAATNGTATTAGCCGTCTCGCAAAGCTA  
TTTGTGCAGTTGGTTGCATTCCTCTAACAGCTGTTAGTAGTGTGGCTAGCGCAGTTTACAACCAGCTGA  
TCTGCACTATAGAGCCAGCTGCCAACTGCGTAGCGGAGATACCAACCAGGCGATAAGCTGTAAGTGGCA  
GAAAGTACAGCATACTTTTCGGGCTTACGCTGTTCTTGCTAAGCATTTAAGCTTTGGAGAAAGAACAGGCA  
AAGAAGCCGATATCGGTGCTCACTACAGGCTCCAGGGCNAAAAAGGAGCAAAAGGTGCGCGGAACAGACC  
AATTTCCAACCCCGCCGCGGCGGTGCCCATAAAAACGGGGCTCTGGTGACCGAGTCGGAGCGGTATAACT  
CCCAGCGGTTAATAGCCAGAGGGAAACCGTTGGCCACCGAGGGACTTTCCTGTAGAGCCCTGATAGTTAG  
AGCAGGTGCCAGAGTAAAAAATGGAGGATGAGCTGCATGCCTTTGCGCGCCGCTCTGCACTACAGCGAT  
CACCGTCACACCAGGCGGTACGCCAGTGCAGCAAAGAGTGGCTGCGTCGTCGCCGGCAAAAGCGAGTG  
AGGAGCTGCCAAGAACGCTAAGAGGCACGATCGAGAAGATGGGCTTAGTCCTAAACGGCTTAACGGCGC  
TGTTCAACGGACAACGCCACATTAACGGGCTGATGCGAGAGGAACTCGCGAGAGTAGAAAGCCTGCAGA  
AGGTGGCGCTCAAGCTCTGTGCGCCGGAACGAAGTGCGACGAGGCGNAAACGACGCCGTCAATTAGCCA  
GACGTGCGGAGCCGAACGTGCTAAAGACGCGCCCAACGAAGCTCGGGGGCCAAAAAGAGGCAAGCACGC  
CCAAACGGCCGAGGGATGGCGTGCCAGAGCAGCGCAGAACCCCTCCAAGAAGGCTAAACGCCAAGGTC  
AAAACCCAGCGAAGCAGGCGCTGCTCACGCATCAAAAGACAGCCCCTGCAAACTCCAAGTTAGCTGGCCA



TAATGGCAACCCAGAGAGCTGGACAGCAGTGAACGGACGTAAGCGGACGCAGAAGCGTCCCAGAGCCGA  
CGCCATTACAGTCCACGGAGTGGGTGACTGCACATATGCCGATATGCTCAGGCTCGTGAAGAGCGACCCG  
GCCCTCAAGCACCTAAGTGGCGATGTGCATGGCATTTCGCAAGACCGCGAAGGGGCGATCTTCTGCTGCGCC  
TCAATAGGAAGCCGGAGCACTCCGCAGATGAGCTTCAAGAAGCTGTGGGAAAGGCATTGGGTGACCGGG  
CGGTAGTAAGAACGCTGACCGAAACGTCCCAGGTGGAGATCAAGGACCTGGATGAGCTGGCGACTAAGG  
AGGAAGTGCTCGAAGCGATTAAAAGTGCCTTACAAGACGATTCCCTTGCCGATTGAAACGATCAAATCGCT  
GCGACCAGCATTTTGGCGGCCAGCAAAGGGCCACAGTTACTCTCCCAGCGCCAAAAGCCAGGACGCTTGTC  
GAGAAGGCCAAGGTGAGGATCGGATGGGTGTCTGCCGTATTCGTGCAATAGACCAACCAAAGCGATGCT  
TTAAATGCCAGGGTTTCGGGCACATTGCGGCCGAACCTGCACCAGCGGAGACGATATGAAAGGCGCATGCTT  
CAGATGCGGGGACACAGGTCACGAAGCAAAGAGCTGCTCCAAGCCACCAAAATGTAGCCTTTGCATACG  
GAAAGGAGAAAAATCAACGGACCACGCTACAGGAAGCTTTAAATGTCCGGCGTATCGCGAGGCAGTACG  
CAAATGAAATGTAAAGGTTACTCCAAATAAACCTTAACCACTGCATAGCTGCTCAAGCCATCTTGGAGC  
AGACTGTTAGGGAGATGCGCATTGATATTGCCATTATCAGCGAACCCCAACCGAGAAACCAACTGCC  
GAGAATATGGACCGAGGATCAGGATGGAAAAGCTGCGCTCTGGGTATGTGGCGACCCATCGACATCGCTG  
ACAAAAACAAAGTCCTTCACTGGGTTTGTACGCGCACAATACGGCAGCCTGTGGATATACAGCTGCTACC  
TGGCCCCAAGCATGCAGCTCTGCGAATTTACAGCTGCATTAGATGCATTAGTAGATGACGCAAGGGGGCG  
GAAGGTCATTATTGCTGGTGACTTCAACGCCTGGGCAGTGGAATGGGGCAGCCAAGCAACTAACGCAAGA  
GGTCGTGCCCTGTTGGAAAGCTTCGCAGCCCTAGATATAGCCCTGCTAAACTTCGGCTCGGAAAATACCTT  
CACTCGAGGTGGTATCGGATCCATAATCGATCTTACCTTCGCAAGCTCGTCACTTTTTAGCGCAACAAAAT  
GGCAACTAAGCGACTTATACACCGCAAGCGACCACTCCGCAATAATATGCACGATTGGTGAAGGAACTGC  
AGCCAGCACTAGAAGCCTAAGTCGGAAAGCTTACCGCCTGGATACTTTCGACCCCGTGGCCTTTTCGAAT  
GCAGTCCACTCGCTTGTCACTGCCGGCAACGCAGAGAGAAGAGCCTCCCAAATGGCATGCCAGCTATCGC  
GTGCCTGTGACGAGAGCATGCAAACCCGGAAAACGTTTCGGCGCCACCATGTACCCACGTACTGGTGGAA  
CGAAAATATTGCCGAAGCACGGCGGAACTGCATCCAAGCCAGGAGGAGATACCAGCGAGCCCGAGGTAG  
ACCAACTATGCCGAACAGCAGCTAAGGTATCAGAGTGCCAGAAAAATGCTAAAAAGTCCATAAGAGAT  
AGCAAACGAGAATGTTTCCTGGAGCTATGCGACTCAGCCGAATACGATCCTTGGGGCAAGGCGTACAAAA  
CTGTCGTTAAAAGACTCTACGCCGGCAAACAAGCGCAGCCTTCTGACCCAAGTGAGCTGAAGTTGATTGT  
GGAAACGCTATTCCCAATCAGACCCGACGTATTACANACGCAAGCCATACCATCGAGCCACGTAGCAGCC  
ATGCCGTCTCTCATCGACGAAGTCTCAGTCGAAGAGGTGCTGACGATCGCCAGAAGCCTAAAGCCCAGTA  
AGGCACCGGGTCCGGACGGAATCCCCAACCGAGCACTGAAACTAGCCATGTCTTGCAGCCCGCGCAGTT  
CGTGCAGCTTTTTAACATGTGCCTAATGGAGAGAACTTTCCCCACAATATGGAAACTCCAAACGCTAGTTT  
TATTACCGAAGCCTGGTAAGCCGCCCGACGACCCATCGTCATACAGGCCGATTTGCCTCCTGGACACGTTA  
GGCAAAGTGCTGGAGAAGCTAATCTGCAACAGGCTTCAGGTAGCTGTCGACAACAATGGTGGCCTGTCCC  
AAAGCCAATTTGGTTTACCAAGGCAAAGTCTACAATAGACGCTCTGGAGAAAGTGGTGCGCATAGCAAC  
AAACGCCATCCAAGGATCGAGATGGAAAAGCGGCACAAAAAAGTACTGCCTCATCGTCACGCTGGATGTT  
AAAAACGCCTTTAACACAGCCAGGTGGGACAAAATATTGGATGCATTGTCAACGTTCCGCGTCCCATATT  
ATCTTCAGGAGACGATACGCAGCTACTTCACTGGAAGACTGCTGCAATACGACACCGCAGACGGCCCCAC  
TACACATCAAGTGTCCGCTGGAGTGCCCCAAGGCTCAGTTCTAGGACCCCTCCTCTGGAACATCATGTACG  
ATGGCATCCTCCGACTGGAACCTCCGATCGATACAAGTATCATCGGCTTCGCGGACGACGTGGCCCTTGTA  
GTCGTGCGCAAGGAATTGAAGGACGTAGAGGAATCGTGCAACCACAGTATTGACCGTGTGCACCAATGGC  
TGGCAGCAGCTGGACTCGAGCTGGCTGCTCAGAAAACAGAAGCGGTGTTAGTCAGCAGTCGAAAAAGAG  
TGGAACAGCGCACATAAGAGTCGGCAGTGCGACAATAGAATCAGCAAGGGGCGCTAAAGTACCTGGGTG  
TCATGCTAGACACAAGAATGTCGTTCAAAGAGCACTTGGAGTACGTGCACAAAAAAGCAGCAGAGTCCTG  
TCGAGCGCTATCCAGGATTATGCTGAACACACGGGGACCGAAACAGCAGAGACGCCGTCTCCTTATGACC  
GTAAACCGAGCGGTAATAATGTACGCGTCCCCCATCTGGAGCAGAGCTATGGCTGTTCCAGCTACAGCC  
GGGGCGTACACTCTATATATCGCCTAAGCGCTCTACGGGTGCTGCGCATTCCGGACGGTATCGGACGA  
AGCGGCGCTGGTTATCGCAGGAATGGTCCCCTAAGCGAACTGGCAACAGAAGCTGTAGTTTGCTATAGA  
GCCACGATGGAAGCAACACAGCAAACCTCGATTTCGCACTGAGGCAAGGATGCAGAGCGTAGCACGATGG  
CAAGCACGCTGGGATCGCGCATCTAAAGGACGCTGGACGCATAGGCTTATCCCAAACCTTGGAAGCCTGGA  
CAAATCGCAAGTATGGCAATACTAATTTTTTATTTAACGCAGCTCCTATCAGGCCACGGATGCTTCAGGAGC  
TACTTAAAGCGATTTCGGCCACGACAACACAGACGAGTGTTCTTGGTGCGGCAGAGGAATCATAGAGGACG  
CCAATCACGTCATATTCGAGTGTGGACGTTTCGCAGCGAACAGACAGGAAGTGGAGGACATCATGGGCAG  
ACCTATCACGGTGGACAACCTGGTCACGAGCATGATAGAGACCGCACAAAAGTGGGACGCTGCCAGCAC  
CTTCGCAGCAGAAGTAATGCGAGAACTCAGGAGAGTTGAGCGCAGCAGACGGAGAACCGCGGATATTTA

GGTAGCAAGAACATGCCTGTGAAGCAATGCTTCGCGGCCGTTCCGCAGGCAATCCACGCTACCTAAACAA  
TACCCCAACTATAACCTAAGCTAAATAACTAAGCATAAATAAACTGAATACAAAAAAAAACACACACAC  
ACACACACACACACACACACACACACACACACACACACACACACACACACACACACACACACACACA  
CACACACACACACACACATACACATACACATACACATACACATACACATACACATACACATACACACA  
CACATACACATACACATACACATACACATACACACACACATACACATACACATACACATACACACACA  
CACACATACACATACACATACACATACACATACACATACACATACACATACACATACACATACACATA  
CATAACACACACACATACACATACACATACACATACACATACACACACACACACACATACACATACACA  
CACATACACATACACATACACATACACATACACATAC

>160\_rnd-1\_family-98\_\_LTR\_\_Gypsy

ATATATATGTAGGAGTTGGAAACAGAACTAGGAGTGGTCTGAACTTACAATCAGTTAAATTAAACAGGCGA  
GTATAATGTTGGCATTATACTCATTTTGGTAATATAAAATCACTTATCATATGCAACCCTGCTATGGATATTT  
AATCAACGATAGATTTATCGATAAAAATACAAGAAGGAGAAGCTCAGTTGTAAGCTAGAAGAGTCAATG  
AAAAGATGTGTTTCGCTGTTGCTCGTTGTCTTTGAAATACATGTCTGGAAAATGTACAATAATCATAAGTTTA  
CGCTTGTTACCAATTTCTCTAAATAAAATAATATGAACATAAAGAAGTCAAGTGCTTGTGAAGGCCATCG  
AATGGTCATCCCTACAAATTTGGTGTCTGAGAGTGGGATAGACAGAAATTGTGAAATTCGTAAATTGATTA  
ACGAGTACAAACGTATGCAAGACTATTAATCGGAGCATAAAACGAAGCGGGTGCATGAAAATTCATTAA  
AATTCGTATGCCCTGGAAAAAATGGAAAAAGTCAAGAATCGTCTAGGATTAATGGCGACAGCGGCGAAG  
TATGCCTAGAGAGCTCTAGTAAGAGCGAGACAAACAGTCGTGTATTGCGTGACAGTGGTCGATAAGCGCA  
AGCGAGAAGGCGATGTTTTAAATTCTGCGTAGCAAAGGCTGGATAGCGCAAATTTTCACTTCGTGATGA  
AATAAGAAGTTGCAGATCAAAGAGGCGAAGAGCGAAGAGCGCGGAATCTTTCAATAAAAGAGCGTGTGA  
CTGGAACGTGCTTCAACACGACAACGATGATCACAGGGTGTATCAAGTTACAGATCAACAACAGAGTATG  
TTATTTCTGTCATTATATGAAAATAATTAAGTCTAGTTGTTGAGTAAAGAGTGTAAATCAGTAAAAAATTTTC  
AAAGAATCAAATTATAACAAAGAAGAAATTAAGTGTAAAGCAAACACAAAGTGAAAGTATAAGTTAAGAC  
AGACGAATATAATAATTTAATAATTTCTAAAGTTGCTGAAAAAAAAAAAACTAAAATTTGATTCATAAGAG  
TTTAATTACTTATACCATTAAGTTAAGTACATTGAATTGTTTATTTGTAAGATTCAATTTTAAGCATTGTGA  
AAAGCGAGCAACGACGATAACAAAATGAACAGAGACGAAATTTTGGCGTTAAGAGTTAACGAATTA  
GAAAAGTTATCGGCACTTAGTTTGGTAACAACAGGTAGAAAGCAAACCTTTGCAAGACCGACTTTTAGAAT  
ATTATGGGTTGCAGGTTGACGATAATGAATCTGAGTATGACGATGCTGGGTGCGCTCATACCCGTCAAAG  
CTCACCATGCAGATAGTCCGAACAACGTTTACATTACGCGACATTGAAGATTCACTCTCGCAATTCAATG  
GGTCAAATCAACCAGCTGTTGAAAAATGGATTCATGAATTTGAAGATAACGCTTTGGCAGTGCAGTGGAA  
CGACCTTCAGAAATTTATTTACTCAAAGCAATTACTAAAAGGTGCAGCAAATTTATTCGTGCGCAGTCAG  
CATGGAATTTCAGATTGGATATCTTTAAAGCAAGCGCTATTGGAAGAATTTGGGACGGTAGTTTCATCAAT  
AGACGTCCACCGCATGTTGCGGAATAGGCGTAAGCGTCAAGGTGAAGATTATATAGAATATCTGTATAGC  
CTTATGGAAATTGGCGGACCTCTTAACCTGGATGACTCAAGCCTGATAGAATATTTTATTGAGGGAATACC  
TGACTCGAGGAGTAACAAAAGTAATCTGTATCAGGCCAAGACTCTGCAGCAACTAAAAGAACAAATCAA  
GGTATATGAGAAAATCCGTAGTAGTCGCCCTCAAGCGTCTAATACGGGTAGGATGCATAACGATACCGAA  
GAAAAGAAACCTGACTTGAATAAAGAACGAATTAAGAAATGTTTCAAATGCGGCGATCCATCACATCTAG  
CCAGAGAATGTAGACAGCCAATAAAATGTTACAAGTGTGCTCAACCAGGGCATAAGGCAGCTAACTGTTT  
AGGATCGCGTGCAGTGGAGAAGAAAGAAGGCCAAAATGCGAACACGATGATAACAAGGCCAACAGTA  
GTGGAAAATGCATTTTTTAAGGAGTTGTCTTGTAAGAACATATGCTTCTCTGCATTAATCGATACAGGCTGT  
GACCTCTGTCTGATACGCGATGATATCCTTAAAGAGCTAGGAAAAGTTGAACTGAATAATGAAAAACAGT  
GTCTTGTTGGTATCTGTAATAGTGAGCTAAATACACTGGGAAGCTTTGTCACTCAAGTCGAAGTTGATGGT  
ATCTTACTGGATATAACCTTTTCATGTTACGAGCAGAGACGACATCCAATACTCAGCTGTAATAGGAAACA  
GCGTATTGAAGCAAGCGGACTTAATAGTATCGGAAAATTTTCGTAGAATTTTCGACCCAAAGTGAAGGACAA  
TGCAAACGAGAGAGTAATTGACAAGACATCAACAATAACAGAAGATACTGTCTGAAAATAAGAAGCCAGA  
CATAGAGCTTTTACAAGAATTCAAAGATGTATGTTTTTTTTGCGAGAAAATCAGGAGGCTGAGATCGATCTAC  
ATCACTTAGAAAAACCTGTTGCAGACGCAGTTCAAGCAATAATTAATAAACTATTCACCTGAAATGAAGAA  
GAAATGTCCAATTGAAATGAAAATTTTGTTAAATGATGAGCGTCCAGTTTTTCGAACGCCCAAGGCGCATA  
TCACATGCGGACAAGTCTATTGTCGATTCGCAAATCAAACTTGGCTAGAAGAAAAGATCATACAGCCAA  
GTACATCGGAGTATGCATCTCCTGTTGTCCTCGTTCCGAAAAAAGATGGTACCAAAGATTGTGCTGTGAC  
TACAGGCGTTTTAAACGAAAAGATCGCGAGGGACAATTTTCCAATGCCCTTAATAGACGATGTGATTGAGA  
GATTGCAGGGCCAAAGTGTGTTTACTACACTTGATCTCGCAAACGGATTTTTTCATGTTCCAATTGAGCCA  
AATTCGAGAAAATTTACATCATTTGTAACAAGTGCAGGGCAATATGAATTCCTGTTCGTCCCTTTTGGAAT  
ATCGAACTCCCAGCTGTATTTTCCAGATTCATTCATGCAATTCTTGTAAGATCTGGTACAGGATGGTACAG



GGATGGCGTGCCAGAGCAGCGCAGAACTCCCTCCAAGAAGGCTAAACGCCAGGGTCAAAACCCAGCGAA  
GCAGGCGCTGCTCACGCATCAAAAGACAGCCCCTGCAAACCTCAACTTAGCTGGCCATAATGGCAACCCA  
GAGAGCTGGACAGCAGTGAACGGACGTAAGCGGACGCAGAAGCGTCCCAGAGCCGACGCCATTACAGTC  
CACGGAGTGGGTGACTGCACATATGCCGATATGCTCAGGCTCGTGAAGAGCGACCCGGCCCTCAAGCACC  
TAAGTGGCGATGTGCATGGCATTTCGCAAGACCGCGAAGGGCGATCTTCTGCTGCGCCTCAATAGGAAGCC  
GGAGCACTCCGCAGATGAGCTTCAAGAAGCTGTGGGAAAGGCATTGGGTGACCGGGCGGTAGTAAGAAC  
GCTAACCGAAACGTCCCAGGTGGAGATCAAGGACCTGGATGAGCTGGCGACTAAGGAGGAAGTGCTCGA  
AGCGATTAAAAGTGCCTTACAAGACGATTCTTGGCGATTGAAACGATCAAATCGCTGCGACCAGCATTT  
GGCGGCCAGCAAAGGGGCCACAGTTACTCTCCCAGCGCCAAAAGCCAGGACGCTTGTCGAGAAGGCCAAA  
GTGAGGATCGGATGGGTTGTCTGCCGTATTCGTGCAATAGACCAACCAAAGCGATGCTTTAAATGCCAGG  
GTTTTGGGCACATTGCGGCGAACTGCACCAGCGGAGACGATATGAAAGGCGCATGCTTCAGATGCGGGGA  
CACAGGTCACGAAGCAAAGAGCTGCTCCAAGCCACCAAAAATGTAGCCTTTGCATACGGAAAGGAGAAAA  
ATCAACGGACCACGCTACAGGAAGCTTTAAATGTCCGGCGTATCGCGAGGCAGTACGCAAAAATGAAATGT  
TAAGGTTACTCCAAATAAACCTTAACCACTGCATAGCTGCTCAAGCCATCTTGGAGCAGACTGTTAGGGA  
GATGCGCATTGATATTGCCATTATCAGCGAACCCCAACCGAGAAACCAACTGCCCCGAGAATATGGACC  
GAGGATCAGGATGGAAAAGCTGCGCTCTGGGTATGTGGCGACCCATCGACATCGCTGACAAAAACAAAG  
TCCTTTACTGGGTTTGTACGCGCACAAATACGGCAGCCTGTGGATATACAGCTGCTACCTGGCCCCAAGCAT  
GCAGCTCTGCGAATTTACAGCTGCATTAGATGCATTAGTAGATGACGCAAGGGGGCGGAAGGTCATTATT  
GCTGGTGACTTCAACGCCTGGGCAGTGGAATGGGGCAGCCAAGCAACTAACGCAAGAGGTCGTGCCCTGT  
TGAAAAGCTTCGCAGCCCTAGATATAGCCCTGCTAAACTTCGGCTCGGAAAATACCTTCACTCGAGGTGG  
TATCGGATCCATAATCGATCTTACCTTCGCAAGCTCGTCACTTTTTAGCGCAACAAAATGGCAACTAAGCG  
ACTTATACACCGCAAGCGACCACTCCGCAATAATATGCACGATTGGTGAAGGAACTGCAGCCAGCACTAG  
AAGCCTAAGTCGGAAGCTTACCGCCTGGATACTTTCGACCCCGTGCCCTTTTCGAATGCAGTCCACTCGC  
TTGCCACTGCCGGCAACGCAGAGAGAAGAGCCTCCCAAATGGCATGCCAGCTATCGCGTGCCTGTGACGA  
GAGCATGCAAACCCGGAAAACGTTTCGGCGCCACCATGTACCCACGTACTGGTGGAACGAAAATATTGCC  
GAAGCACGGCGGAACTGCATCCAAGCCAGGAGGAGATACCAGCGAGCCCGAGGTAGACCCAACTATGCC  
GAACAGCAGCTAAGGTATCAGAGTGCCAGAAAAATGCTAAAAAAGTCCATAAGAGATAGCAAACGAGAA  
TGTTTCCTGGAGCTATGCGACTCAGCCGAATATGATCCTTGGGGCAAGGCGTACAAAACCTGTGCTTAAAA  
GACTCTACGCCGGCAAACAAGCGCAGCCTTCTGACCCAAGTGAGCTGAAGTTGATTGTGGAAACGCTATT  
CCCAATCAGACCCGACGTATTACACACGCAAGCCATACCATCGAGCCACGTAGCAGCCATGCCGTCTCTC  
ATCGACGAAGTCTCAGTCGAAGAGGTGCTGACGATCGCCAGAAGCCTAAAGCCCAGTAAGGCACCGGGT  
CCGGACGGAATCCCCAACCGAGCACTGAACTAGCCATGTCCTTGCAGCCCGCGCAGTTTCGTGCAGCTTT  
TTAACATGTGCCTAATGGAGAGAACTTTCCCCACAATATGGAACTCCAAACGCTAGTTTTATTACCGAAG  
CCTGGTAAGCCGCGCCCGACGACCCATCGTCATACAGGCCGATTTGCCTCCTGGACACGTTAGGCAAAGT  
GCTGGAGAAGCTAATCTGCAACAGGCTTCAGGTAGCTGTGACAACAATGGTGGCCTGTCCCAAAGCCAA  
TTTGGTTTTCACCAAGGCAAAGTCTACAATAGACGCTCTGGAGAAAGTGGTTCGGCATAGCAACAACGCCA  
TCCAAGGATCGAGATGGAAAAGCGGCACAAAAAAGTACTGCCTCATCGTCACGCTGGATGTTAAAAACG  
CCTTTAACACAGCCAGGTGGGACAAAATATTGGATGCATTGTCAACGTTCCGCGTCCCATATTATCTTCAG  
GAGACGATACGCAGCTACTTCACTGGAAGACTGCTGCAATACGACACCGCAGACGGCCCCACTACACATC  
AAGTGTCCGCTGGAGTGCCCCAAGGCTCAGTTCTAGGACCCCTCCTCTGGAACATCATGTACGATGGCATC  
CTCCGACTGGAACCTCCCGATCGATACAAGTATCATCGGCTTCGCGGACGACGTGGCCCTTGTAAGTCGTCGG  
CAAGGAATTGAAGGACGTAGAGGAATCGTGCAACCACAGTATTGACCGTGTGCACCAATGGCTGGCAGC  
AGCTGGACTCGAGCTGGCTGCTACAAAACAGAAGCGGTGTTAGTCAGCAGTCGAAAAAGAGTGGAAC  
AGCGCACATAAGAGTCGGCAGTGCGACAATAGAATCAGCAAGGGCGCTAAAGTACCTGGGTGTCATGCT  
AGACACAAGAATGTCGTTCAAAGAGCACTTGGAGTACGTGCACAAGAAAGCAGCAGAGTCCTGTGAGC  
GCTATCCAGGATTATGCTGAACACACGGGGACCGAAACAGCAGAGACGCCGTCTCCTTATGACCGTAAAC  
CGAGCGGTAATAATGTACGCGTCCCCCATCTGGAGCAGAGCTATGGCTGTTCCCAGCTACAGCCGGGGCG  
TACACTCTATATATCGCCTAAGCGCTCTACGGGTCAGCTGCGCATTCCGGACGGTATCGGACGAAGCGGC  
GCTGGTTATCGCAGGAATGGTCCCGCTAAGCGAACTGGCAACAGAAGCTGTAGTTTGCTATAGAGCCCAC  
GATGGAAGCAACACAGCAAACCTCGATTTCGCACTGAGGCAAGGATGCAGAGCGTAGCACGATGGCAAGCA  
CGCTGGGATCGCGCATCTAAAGGACGCTGGACGCATAGGCTTATCCCAAACCTTGGAAGCCTGGACAAATC  
GCAAGTATGGCAATACTAATTTTTATTAAACGCAGCTCCTATCAGGCCACGGATGCTTCAGGAGCTACTTA  
AAGCGATTCCGGCCACGACAACACAGACGAGTGTTCTTGGTGCGGCAGAGGAATCATAGAGGACGCCAAT  
CACGTCATATTTCGAGTGTGGACGTTTCGCAGCGAACAGACAGGAAGTGGAGGACATCATGGGCAGACCTA

TCACGGTGGACAACCTGGTCACGAGCATGATAGAGACCGCACAAAAGTGGGACGCTGCCAGCACCTTCGC  
AGCAGAAGTAATGCGAGAACTCAGGAGAGTTGAGCGCAGCAGACGGAGAACCGCGGATATTTAGGTAGC  
AAGAACATGCCTGTGAAGCAATGCTTCGCGGCCGTTCCGCAGGCAATCCACGCTACCTAAACAATACCCC  
AACTATAACCTAAGCTAAATAACTAAGCATAAAATAAACTGAATACAAAAAAAAAACACACACACACACA  
CACACACACACACACACACACACACACACACACACACACACACACACACACACACACACACACACACAC  
ACACACACACACACACACACATACACATACACATACACATACACATACACATACACATACACATACACAT  
ACACATACACATACACATACACATACACATACACATACACATACACATACACATACACATACACATACAC  
ACACACACATACACATACACATACACATACACATACACATACACACACACATACACATACACATACACAT  
ACACATACACATACACATACACATACACATACACATACACATACACACACACACACACATACACATACAC  
ATACACATACACATACACATACACATACACA

>160\_rnd-1\_family-159\_\_LINE\_\_I-Jockey

CACTTACGTTTGTGTTTCTCTGGAGATCGGACGTGAAAATTGCAGTCTCGTGTGTGTGTGCGCGTTAGTGC  
ACCGCTGGCAGCAGGCATAAACCAAGAAAGTGACAGTGACACTGTATAAAGCCCCGCCCCAGGGCAATCC  
ATACAAATCCCCTTATAGTGGGTAACTATACGCAACTGCTGCCTCTGGCAGCCGGAGTGTTATACAAA  
TTAACAATATTTTAACAAAAAAATTACCGCGTGACAGTGCGTGAGAACAAAGTTCTTGCAAACTTAAGCT  
GCGCTCAGCTGATCGCAACTCAAGTGCGTGTGTGTGTGCGCGAGTGCAGCAAAGCTTTCGCGAGAGAGCT  
TTCAGCTTGCAGCTGCACTGATAGTGCTGGCAAACAGTCACTGCAGTGACAGTGCTGACACTAAAGTCA  
CAATTTGTGATCAATCACTTGTTACAAAAATACGGGTATTTTTTGTAAATTAAGTGTAAAAAACTTGTTTTGT  
TTTTATTTTTTATTCTTTTTTCTCCCTGTGGGGAAAAAATTATAACAAAGTAAAGAACAAATGGCTACAAAC  
AACCGACCCCAAAACAACGAAGAAATTCATTTCGCCAATCTACCCGCTGCCGAACAGCTCAATAATATCCC  
CTACAAATATAGCCGCTAATGTTCGATCGCCTCGACGGAAGCAGGCCACTGGAAGATTTTTTACCAATATTA  
CAACAACGTGCTCGCCAGTAGTGCAAACCGGAACGGCGCCTCCACCTCGCTGTCAGCCGGTACCCAGCAA  
TGCTCGACTTGGAACCGCAACAGCACGGCACTGTCAGCACAAACGACAGCAACAACCACCACAACCACA  
GCGTCATCCAGCAGCGGCTGCAGGACATCTGCCTCAACAGGCACAAGCCGCGCCGCTTTAGAGCCCATCG  
GGACCCGCCCAAAAGCCGCCAATCCGACCTTGCAGTCCACCCCTTATGGCACCCAGGCAGCTGGTTCTTGT  
GTCACAAACCCCCCTCTGCCTCCCATAAAGAACGCAGGTGCTACGCCAGCCTTTCGAAGAGCCACTGGTAG  
ATTGGCAAACGGTTTCCGCAAAAAAACGGCGTGGGACTACATTATTATCCGAAGGCGTAAAAAAGGGA  
AGCAACTAAATAACCGCAACACCAGCCGCGCTGGAGCTAAGCCCGCAACTCCCAGTACCGCTTCGGCAAT  
TAGCAACAGATATGCCTCCCTTGAGCCTCAGGAAGACGCCTCTGTAATCGATGACGGCGAGATGGACACT  
GCCGACGAAGCGCCTCCAGTCAACAGACCAACAACAATCAGCGAAAAAGATCTCCAACCCAGGCCGATA  
ACAGTCCCTGGAGTCAGCGATATTGTGCGCAATGGAGCGAACCATAGATCAGGCAGTGGGCGCAGACGCCT  
ATGAATTCAAGGTCTCTCCCTCTGGCTATCTAAGAATTTACGCCAAAGATGCCGACACCCACAGAGCAATT  
GTCCGCAAGCTCACTGAAGTGAGAGTGCAATTTACCCACTTCTGCCTAAAGGAAGACAGACCATACCGCG  
TTGTGGTTAAAAATCTGGCCGCTTCCACTCCCAGAAGCCAGATTGAAGCTGCCTTTACATCGCACGGCCAT  
ATTGTGACGAACCTTTACAACCCGGGCGCCAGACAGCCAACAAGTGATGCAGACTCCACCAACGACTTTC  
CAAGTCGCAACTTCTGGTTTGTGCGATCTCAAGCAGTCTCTTAACAACAGGGAAGCGCTGCGGCTCAACAA  
GGTTGGCCGCCAACGGGTCACTATTGAGCTTCCGAGGAAGAACAATAGTATAAGGCAGTGTTTCCGCTGC  
TTCGAGTTCGACCACACCAAAAACTACTGTCTCAAACAGCCCAAGTGTGGTAGGTGCGGTGAGTCCCATT  
GGACAAACTCCGAGCAGTGCCAGGCCAAAACAGTGGCAGACCTGCGATGCTCCAAGTGCAGGGGAAACC  
ATGCTGCTTCCTATAAAGGATGCAAAAGCTATCAGGTGAGACTAAATGCCAGGCAGCCGGCCATCAATGT  
CTCCCCCTCTACACGATATAGCCATCCTCAAAATACACGAAGAACCCTCAGCAGTTCGTACCTTCCCGAA  
TTGTGCAACAGGGCCTGTCGTATGCTGATGCGCTACGGCCAGGCCATCATGTACAAGTCCGCCAACCCCC  
AGCGCGCACTCTTCAGCCCACCGTCAATCCAATGCAGCTCCAACAACCACTGCAAGGGCCTCAGGAGCAA  
GACGCTTCCCTTGAGGCGATCCTTCAAAACCTCCAGCAGTCCATTGCAGCACTGAATGCCGCGAGTTGCAAC  
CATTCTGGTTAGCATTAAGAGCTAAAGGATGCGCAAGGTTCCCCGCGAGCTTAGATTCCCAAAAAGCCGC  
AAATAATGGCTACCCAGTTACGTCTCGGATCGTGGAACGCTCGTGGCATCCTCCAAAATGCTAACGAGCT  
CAAGCTTTTTTCTGAAAAAGCATGATGTAGACATCATGCTCATCTCAGAAACACATCTGCACACAAACTTGT  
ACCTAACAATGGAGGGGTACGTCTGCTACCGTGCGGATCACCTACAGGACGAGCCAGAGGTGGTGCTGT  
AGTGCTGGCAAAGCAGGATTTAGCACACTACCATCTACACACAGTGACCTCCAGCGACACACAGCTGGCT  
GCTATCATGGTGGAGACTCCCTTGGGCGAAATCCTCGTTGCGGCAGCATACCTACCACCAAACATCCCCTG  
GAACCGAGCGGAATTTGATTCCCTGTTTGGCCAGCTTGGCCCCAAATTCATCGTTGGAGGCGACTTCAACG  
CTAAGCACAGACTGTGGGGAACTACAGAGCTGACAGCAGAGGCACTGCGCTCCATGAGGCGCTCACTCC  
CTGCTCAGCCCAGGTACTGGCCACCGGTAGACCTACCCACTTTCCGTACAACCGGCAAAAGTACGCCTTCCT  
GTATCGACTTTTTTATATTCAAGGGCATCCCCAACAGCGTACTATCGGTTTCGCGAAGAGTATGATCTATCT

TCCGACCATCTGCCACTCCTCACAACGATCAACACGGCTGCACAAAGGATCCCCAAAAAAGCGCAGGCTTG  
TCCTCCCTGGGTCGAACATCCAACGATTTAAGGCCGAATAAATAGCTTGATCAACCTAAACACGCAGAT  
TCTGTCAAGTTGAGGACGTCGACGCTGCAGTACAAACCCTGTTGGACCAAGTACATGCCGCAGCCGCCAAC  
GCTGCGCCCGCACATATCTACTCAGCCCCTACAAGCCAGCGGCCAAGGACGTTTTCCCCCATATTGGAAG  
GTCTTCTCGCCCTAAAAAAGCGACTGAGGAGGGAGTATGTCCGTACCCAGGACCCACGATTGACAGGAT  
CTATCGTCGTATTGCTAACAGGGTCAGGAAGGAGCTGATTATCTCGAAAAGAAATGCCACAGACACCATG  
CTGGAGGAAGCAACGGCAGACGAGAGCTCCAAATTCGCGCTGTGGAACTTAGCAGTCGATACAAGCGG  
CAAGCTGCGCCAAAGTTCCCGTTTCTGACTTCCCGATGACACCTGGGCCAGATACCAATGGACAGAGCCG  
AAGCCTTTGCCTGCAACTTGGAGGAGCGCTTCAAGCCGTTTGAGACCGCATCGCATGGAAGGATACAGCG  
AGTCGCGCAAATCCTGGAGGCGCCACTCCAAATGTCACTCCCTGTATCGCCAATCACCTTCCAAGAAGTA  
GAGCAGGAGATGAAGAGATTAAAAAGCAGCAAAGCCCCTGGGGAAGATCGGTTGGACAACCAGACAATC  
AAGCTACTGCCATACAAGGCGGTGCTTTTTCTCGTCGCCATTTTAATGCAGCTCTTCGGCTAGGTTACTTT  
CCAGTGGCTTGGAAGAAGGCACATATAATCATGTTGCACAAGAGCGGAAAGCCCCCTAATCAACTGGGAT  
CCNNNNNNNNNNNNNNNNNNNNNNNNNNNNNNNNNNNNNNNNNNNNNNNNNNNNNNNNNNNNNNNNNN  
CTTGGAAGAAGGCACATATAATCATGTTGCACAAGAGCGGAAAGCCCCCTAATCAACTGGGATCCTATCG  
CCCCATCAGCCTCCTGCCTGCCTTTGGTAAGATTCTGGAAAGGTGCATCCTCAGAAGGGTCCTGGATACCC  
CGGAAATAAAACGCTTGATCCCGAAGTTCCAGTTTGGGTTTCGACTCAAACACGGTACCCCTGAGCAACT  
ACATCGGGTCACAAATTATATTTTGGACGGCTTTCACAGGAAAGAGTATGTGGTGGCAGCATACCTCGAC  
ATCCAAGAAGCCTTCGACCGGGTGTGGCACGCAGGACTCCTCTCCAAGATAAAGGACAAATTGAATCCGC  
AGCTATTTAGCACCATTGCGAGCTTCCTAACTGAGAGAACCTTTCAAGTGGTGCAGGATGGAGTAGCCTCT  
CAAACCAAACGCATAAAAGCGGGCGTTCCACAAGGCAGCGTCTTGGGTCCCACGCTATATAGCCTGT  
CACATGACATGCCACAGCAAATGCAAGCAGACGGAATGATCGGCAGGACCTTCTGGTGGCCACGTTTGC  
TGACGACACGGCAATCCTTGCAAAAAACAAATGTGTGTACGTGGCAACTGACCTCTTGCAAGGAATACCTC  
AAGCGATTTGAAAACCTGGGCTTGTAGATGGAACATCGCAGCGAACGCAACCNGGACGGAATGNNCCACG  
GNCACGCACACCCTNCGCNGGCCACGTTTGCTGACGACACGGCAATCCTTGCAAAAAACAAATGTGTGTA  
CGTGGCAACTGACCTCTTGCAAGGAATACCTCAAGCGATTTGAAAACCTGGGCTTGTAGATGGAACATCGCA  
GTGAACCCTGGAAAGTGCGCCACGGTTACCCACACTCTACGCAAGGACTCATGCCCCGGACTTTTTCTTCA  
TGGTGAGCTTCTAGAGCAATATCGTCAACACAAGTACCTAGGTGTCACTCTCGACAGACGACTTACATTTA  
GTAAGCACGTCTCTGCAGTAACGAGCAACATCAAATCTAAGATAAGGCGAATGAGCTGGCTCCTCAACTC  
CAAAAACAACTCTCGCTCCGAAACAAGGTCCTAATCTACAAGGTAATCCTTGCCCCAGTGTGGCGTTAC  
GGGCTTCAAGTTTACGGTATAGCTGCAAAAAACACACCTGAACAAAATTCGCATCATTCAGGCCAAAACCC  
TGCGCAAAATAACTGGAGCCGAATGGTATATTCGCACACGCGACATCGCCAAGGACCTCAAGGTTCCAAT  
GGTGGGCGACGTAGTCAACAGGCAAGCAGCGAGCTACTCAACAAAGCTCCACAACCATCCAACATCCT  
GGCGAGGAGCCTGCTAAGGAGGCGAAGAAGAAGGCGACTGAAGAGGACCTACCCAACCGACCTAATCGA  
TCGTTATGTATAGGTGACAAGCTTCGTTAATTACACCAAAATATGTTTCTGTAATCTGTAAACCTAATTGTA  
TAACTAATTGTAAAACCACAATCATCGCTAAGCTAAGTAATTATGTCACTCTGATAAAAGTTGCTAACATA  
GAGTAACAGGATACCAGATTTCTTAATAAACAAAATATAAAAAAAAAAAAAAAAAAAAAAAAAAAAAA

>Ref\_NewTE4

CATGTAGGAGTTGGAAACAGAACTAGGAGTGGTCGAACTTACAATCAGTTAAATTAAACAGGCGAGTATA  
ATGTTGGCATTATACTCATTGTTGTAATATAAAATCACTTATCATATGCAACCCTGCTATGGATATTTAATC  
AACGATAGATTTATCGATAAAAATACAAGAAGGAGAAGTTCAGTTGTAAGCTAGAAGAGTCAATGAAAA  
GATGTGTTTCGCTGTTGCTCGTTGTCTTTGAAATACATGTTCGGAATAATGTACAATAATCATAAGTTTACGCT  
TGTTACCAATTTCTCTAAATAAATAATATGAACATAAAGAACTCAAGTGCTTGTGAAGGCCATCGAATG  
GTCATCCCTACAAATTTGGTGTGAGAAGTGGGATAGACAGAAATTGTGAAATTCGTAAATTGATTAACGA  
GTACAAACGTATGCAAGACTATTAATCGGAGCATAAAACGAAGCGGGTGCATGAAAATTCATTAATAATTC  
GTATGCCCTGGAAAAAATGGAAAAAGTCAAGAATCGTCTAGGATTAATGGCGACAGCGGCCGAAGTATGC  
CTAGAGAGCTCTAGTAAGAGCGAGACAAACAGTCGTGTATTGCGTGACAGTGGTCGATAAGCGCAAGCG  
AGAAGGCGATGTTTTAAATTCTGCGTAGCAAAGGCTGGATAGCGCAAAATTTTCACTTCGTGATGAAATA  
AGAAGTTGCAGATCAAAGAGGCGAAGAGCGAAGAGCGCGGAATCTTTCAATAAAAGAGCGTGTGACTGG  
AACGTGCTTCAACACGACAACGATGATCACAGGGTGTATCAAGTTACAGATCAACAACAGAGTATGTTAT  
TTCGTCAATTATGAAAATAATTAAGTAGTTGTTGAGTAAAGAGTGTTAAATCAGTAAAAAATTTTCAAAG  
AATCAAATTATAACAAAGAAGAAATTAAGTGTAAGCAAACACAAAGTGAAAGTATAAGTTAAGACAGAC  
GAATATAATAATTTAATAATTTCTAAAGTTGCTGAAAAAAAAAACTAAAATTTGATTCATAAGAGTTTAAAT  
TACTTATACCATTAAGTTAAGTACATTGAATTGTTTATTGTAAGATTCAATTTTAAGCATTGTGAAAAGC

GAGCAACGACGATAACAAAATGAACAGAGACGAAATTTTGGCGTTAAGAGTTAACGAATTA AAAAGAAAA  
GTTATCGGCACTTAGTTTGGTAACAACAGGTAGAAAGCAAACCTTTGCAAGACCGACTTTTAGAATATTAT  
GGGTTGCAGGTTGACGATAATGAATCTGAGTATGACGATGCTGGGTCGGCTCATACCCGTCAAAGCTCAC  
CAATGCAGATAGTCCGAACAACGTTTACATTACGCGACATTGAAGATTCACTCTCGCAATTCAATGGGTC  
AAATCAACCAGCTGTTGAAAAATGGATTTCATGAATTTGAAGATAACGCTTTGGCAGTGCAGTGGAACGAC  
CTTCAGAAATTTATTTACTCAAAGCAATTACTAAAAGGTGCAGCAAAATTATTCGTGCGCAGTCAGCATG  
GAATTTTCAGATTGGATATCTTTAAAGCAAGCGCTATTGGAAGAATTTGGGACGGTAGTTTCATCAATAGA  
CGTCCACCGCATGTTGCGGAATAGGCGTAAGCGTCAAGGTGAAGATTATATAGAATATCTGTATAGCCTT  
ATGGAAATTGGCGGACCTCTTAACCTGGATGACTCAAGCCTGATAGAATATTTTATTGAGGGAATACCTG  
ACTCGAGGAGTAACAAAAGTAATCTGTATCAGGCCAAGACTCTGCAGCAACTAAAAGAACAATCAAGG  
TATATGAGAAAATCCGTAGTAGTCGCCCTCAAGCGTCTAATACGGGTAGGATGCATAACGATACCGAAGA  
AAAGAAACCTGACTTGAATAAAGAACGAATTAAGAAATGTTTCAAATGCGGCGATCCATCACATCTAGCC  
AGAGAATGTAGACAGCCAATAAAATGTTACAAGTGTGCTCAACCAGGGCATAAGGCAGCTAACTGTTTCA  
GATCGCGTGCAGTGGAGAAGAAAGAGGCCAAAATGCGAACACGATGATAAACAAGGCCAACAGTAGTG  
GAAAATGCATTTTTTAAGGAGTTGTCTTGTAAGAACATATGCTTCTCTGCATTAATCGATACAGGCTGTGAC  
CTCTGTCTGATACGCGATGATATCCTTAAAGAGCTAGGAAAAGTTGAACTGAATAATGAAAAACAGTGTG  
TTGTTGGTATCTGTAATAGTGAGCTAAATACACTGGGAAGCTTTGTCACTCAAGTCGAAGTTGATGGTATC  
TACTGGATATAACCTTTTCATGTTACGAGCAGAGACGACATCCAATACTCAGCTGTAATAGGAAACAGCG  
TATTGAAGCAAGCGGACTTAATAGTATCGGAAAATTTTCGTAGAATTTTCGACCCAAAGTGAAGGACAATGC  
AAACGAGAGAGTAATTGACAAGACATCAACAATAACAGAAGATACTGTGCAAAATAAGAAGCCAGACAT  
AGAGCTTTTACAAGAATTCAAAGATGTATGTTTTTTTGCAGAAAATCAGGAGGCTGAGATCGATCTACATC  
ACTTAGAAAAACCTGTTGCAGACGCAGTTCAAGCAATAATTA AAAA ACTATTCACCTGAAATGAAGAAGAA  
ATGTCCAATTGAAATGAAAATTTTGTAAATGATGAGCGTCCAGTTTTTCGAACGCCCAAGGCGCATATCAC  
ATGCGGACAAGTCTATTGTGCGATTTCGCAAAATCAAACTTGGCTAGAAGAAAAGATCATACAGCCAAGTAC  
ATCGGAGTATGCATCTCCTGTTGTCTCGTTCCGAAAAAAGATGGTACCAAAAGATTGTGCTGTGACTACA  
GGCGTTTAAACGAAAAGATCGCGAGGGACAATTTTCCAATGCCCTTAATAGACGATGTGATTGAGAGATT  
GCAGGGCCAAAGTGTGTTTACTACACTTGATCTCGCAAACGGATTTTTTCATGTTCCAATTGAGCCAAATT  
CGAGAAAATTTACATCATTTGTAACAAGTGCAGGGCAATATGAATTCCTGTTTCGTCCCTTTTGGAAATATCG  
AACTCCCCAGCTGTATTTTCCAGATTCATTCATGCAATTCTTGTAGATCTGGTACAGGATGGTACAGTCGT  
AACTTATATGGATGATCTTATAATTCCCTCCAAGGATATAGATGAAGGTATCCAAAAGTTAAAGCGCGTA  
CTGGACAGAGCAGCAGAGTTTAACTTGGCTATTAAGTGGAGCAAGTGCCAGTTTCTCATGAAGGAAGTTG  
ACTTTTTAGGGTACGTTATACAGGGAGGCACAATAAGACCATCTGCAAGAAAAACCCAGGCAGTTCAAAA  
TTTTCTATACCGCATGACCGAAAGAGTTTGCAGCGTTTTTCTCGGATTAACATCGTACTTTAGGCGCTTTGT  
AGAAGACTATGCGCTGATAGCCAAACCGCTCTCCGATTTGTTACGGAAAGACGTGCAATTTAAAGTTGAT  
GAAGAACAAC TAGTCGCATT CAGGCAATTA AAAATCAGCATTAGTTAGTACTCCAGTATTGCGATTATATA  
ATCCGAAAGCCAAGACTGAAGTGCATACGGACGCCTCAATGAATGGTTATGGTGGTGTACTCTTGCAAAA  
AGACTCGGACGATCAATTGTTGCATCCAATTCAATATTTAAGTCGGAAAAACAAAACCCCTCAGAAGAGAAG  
TATCATTCTTATGAGCTTGAGGTGCTGGCTATAGTCGAGGCCTTGAAAAAGTGGCGCGTTTACTTACTTGG  
CATAAAATTTAAGATTGTGACCGACTGTAACGCTTTTCGCTTTGACCATGAAAAACGTGGAGATATTCCAT  
TGAGAGTCTCGCGTTGGGCACTCTTCCTTCAAGATTTTGACTACAGTATTGAGCATCGAAATGGCAGCAAA  
ATGAGGCATGTTGATGCTTTAAGCCGCGTATCCTGTCTTATGCTTGAAGACTCACTGCAGCACAGATTGCA  
GCAAGCACAAAGCGAGAGATGATTGGGTCCGAGCGGTGCTAACTGTTTTGGATTGTAGCACATACGAAGAT  
TTTTATGTTAGGCATGGTATTTTATACAAGGATCCCATCAAGGAAC TTATAGTAGTACCATCGCTGATGGA  
AGACGAAATCATAAGAATTGCACACAAGCAAGGGCATTCTCAGCGAAACGAAC TCAAGAAGCAATCGA  
GAAGACATTCTATATTCCGCAGCTATCGTCAAAAAGTGCCAAAAATTTGTA AAAAAGTTGCGTAGAATGCATA  
ATATCTGAGAGCAAATCAGGCAAGAAAGAAGGGTTTTTGGCACCAATTGACAAAGAAGACAAGCCCTTA  
GGCACGTACCATGTGGATCATGTGCGTCCAATAGAACAGACAAGTAAAAACTATAACTATATTCTAGTGA  
TAGTCGATGCGTTTTTCAA AATTTGTTTGGCTCTATCCAACAAAAAATACCACCGCAGAAGGAGTTGTAGAT  
CGACTAAGACGGCAGGCAGCAGTGTGTTGGAAATCCTAAGCGCATAATATCAGATAGGGGTGCAGCTTTTCG  
TTTCAAACCTGTTCAAGGAGTACTGTGAAACAGAAGGTATACAGCATCTTACGATAGCTACAGGAGTTCC  
AAGAGGAAACGGCCAGGTAGAACGTATACACAAAATCGTAATACCAATGTTGTCTAAACTATGTGCTGAA  
AATCCTTG TAGCTGGTATAAGCATATTGATATCGTTCAACAAACAATCAACAGTACGCCGCCAAGAAGCA  
CTAAAGTTTCACCGTTTAGATTGTTGACTGGTGTGGAGATGAACTTAAAAGAATATCGGACTTGCAAGA  
ACTATTAGAAGAAGCTGCTATAGAGGAGCTAAGTAACGAAAGAGAAGAAGTTTCGTAAAGAAGCGCGGCA

AAATATAGCAAAAATACAGCAGGAAAACCGAAAATCTTTTAATAAACATCGCAAAAAAGAGTCCAATTA  
TAAAATAAACGAACTTGTAGCCATTAAGAGAACACAGTATGGTACTGGTTTAAAATTGAAACCTAAATTC  
TTTGGTCCATATAAAAATAGTAAAGATTCAAAACCATGGTAGATATGACGTAGAAAAGGTAGGCGACCACG  
AAGGTCCAGGGAAAACACTACAACGTAGCAGAATACATGAAAAAATGGGAGCCAAATGCTAATTCACACAG  
AAGAGTCGTCATTCGGGTCTGAATGAAGAGTCAGGATGGCCGAGTGTAGGAGTTGGAAACAGAACTAGGA  
GTGGTCGAACTTACAATCAGTTAAATTAAACAGGGCGAGTATAATGTTGGCATTATACTCATTGTGTAATAT  
AAAATCACTTATCATATGCAACCCTGCTATGGATATTTAATCAACGATAGATTTATCGATAAAAAATACAAG  
AAGGAGAAGTTTCAGTTGTAAGCTAGAAGAGTCAATGAAAAGATGTGTTTCGCTGTTGCTCGTTGTCTTTGA  
AATACATGTCGGAAAATGTACAATAATCATAAGTTTACGCTTGTTCCACCAATTTCTCTAAATAAATAATAT  
GAACATAAAGAACTCAAGTGCTTGTGAAGGCCATCGAATGGTCATCCCTACATTCATG

>9\_rnd-1\_family-224\_\_LTR\_\_Gypsy

ATATATGTAGGAGTTGGAAACAGAACTAGGAGTGGTCTGAACCTTACAATCAGTTAAATTAAACAGGGCGAGT  
ATAATGTTGGCATTATACTCATTGTGTAATATAAAATCACTTATCATATGCAACCCTGCTATGGATATTTA  
ATCAACGATAGATTTATCGATAAAAAATACAAGAAGGAGAAGCTGAGTTGTAAGCTAGAAGAGTCAATGA  
AAAGATGTGTTTCGCTGTTGCTCGTTGTCTTTGAAATACATGTCGGAAAATGTACAATAATCATAAGTTTAC  
GCTTGTTCCACCAATTTCTCTAAATAAAATAATATGAACATAAAGAACTCAAGTGCTTGTGAAGGCCATCG  
AATGGTCATCCCTACAAATTTGGTGTCTGAGAGTGGGATAGACAGAAATTGTGAAATTCGTAAATTGATTA  
ACGAGTACAAACGTATGCAAGACTATTAATCGGAGCATAAAACGAAGCGGGTGCATGAAAATTCATTAA  
AATTCGTATGCCCTGGAAAAAATGGAAAAAGTCAAGAATCGTCTAGGATTAATGGCGACAGCGGCGAAG  
TATGCCTAGAGAGCTCTAGTAAGAGCGAGACAAACAGTCGTGTATTGCGTGACAGTGGTCGATAAGCGCA  
AGCGAGAAGGCGATGTTTTAAATTTCTGCGTAGCAAAGGCTGGATAGCGCAAAATTTTCACTTCGTGATGA  
AATAAGAAGTTGCAGATCAAAGAGGCGAAGAGCGAAGAGCGCGAATCTTTCAATAAAAGAGCGTGTGA  
CTGGAACGTGCTTCAACACGACAACGATGATCACAGGGTGTATCAAGTTACAGATCAACAACAGAGTATG  
TTATTTTCGTATTATATGAAAATAATTAAGTGTGTTGAGTAAAGAGTGTAAATCAGTAAAAAATTTTC  
AAAGAATCAAATTATAACAAAGAAGAAATTAAGTGTAAAGCAAACACAAAGTGAAGTATAAGTTAAGAC  
AGACGAATATAATAATTTAATAATTTCTAAAGTTGCTGAAAAAAAACCTAAAATTTGATTCATAAGAGTT  
TTTAATTACTTATACCATTAAGTTAAGTACATTGAATTGTTTATTTGTAAGATTCAATTTTAAGCATTGTGA  
AAAGCGAGCAACGACGATAACAAAATGAACAGAGACGAAATTTTGGCGTTAAGAGTTAACGAATTA  
GAAAAGTTATCGGCACTTAGTTTGGTAACAACAGGTAGAAAGCAAACCTTTGCAAGACCGACTTTTAGAAT  
ATTATGGGTTGCAGGTTGACGATAATGAATCTGAGTATGACGATGCTGGGTCGGCTCATACCCGTCAAAG  
CTCACCAATGCAGATAGTCCGAACAACGTTTACATTACGCGACATTGAAGATTCACTCTCGCAATTCAATG  
GGTCAAATCAACCAGCTGTTGAAAAATGGATTCATGAATTTGAAGATAACGCTTTGGCAGTGCAGTGGAA  
CGACCTTCAGAAATTTATTTACTCAAAGCAATTACTAAAAGGTGCAGCAAAATTATTCGTGCGCAGTCAG  
CATGGAATTTTCAGATTGGATATCTTTAAAGCAAGCGCTATTGGAAGAATTTGGGACGGTAGTTTCATCAAT  
AGACGTCCACCGCATGTTGCGGAATAGGCGTAAGCGTCAAGGTGAAGATTATATAGAATATCTGTATAGC  
CTTATGGAAATTGGCGGACCTCTTAACCTGGATGACTCAAGCCTGATAGAATATTTTATTGAGGGAATACC  
TGACTCGAGGAGTAACAAAAAGTAATCTGTATCAGGCCAAGACTCTGCAGCAACTAAAAGAACAAATCA  
AGGTATATGAGAAAATCCGTAGTAGTCGCCCTCAAGCGTCTAATACGGGTAGGATGCATAACGATACCGA  
AGAAAAGAAACCTGACTTGAATAAAGAACGAATTAAGAAATGTTTCAAATGCGGCGATCCATCACATCTA  
GCCAGAGAATGTAGACAGCCAATAAAATGTTACAAGTGTGCTCAACCAGGGCATAAGGCAGCTAACTGTT  
CAGGATCGCGTGCAGTGGAGAAGAAAGAAGGCCAAAATGCGAACACGATGATAAACAAGGCCAACAGT  
AGTGGAAAATGCATTTTTAAGGAGTTGTCTTGTAAGAACATATGCTTCTCTGCATTAATCGATACAGGCTG  
TGACCTCTGTCTGATACGCGATGATATCCTTAAAGAGCTAGGAAAAGTTGAACTGAATAATGAAAAACAG  
TGTCTTGTTGGTATCTGTAATAGTGAGCTAAATACACTGGGAAGCTTTGTCACTCAAGTCGAAGTTGATGG  
TATCTTACTGGATATAACCTTTCATGTTACGAGCAGAGACGACATCCAATACTCAGCTGTAATAGGAAAC  
AGCGTATTGAAGCAAGCGGACTTAATAGTATCGGAAAATTTTCGTAGAATTTTCGACCCAAAGTGAAGGACA  
ATGCAAACGAGAGAGTAATTGACAAGACATCAACAATAACAGAAGATACTGTGCAAAAATAAGAAGCCAG  
ACATAGAGCTTTTACAAGAATTCAAAGATGTATGTTTTTTGCAGAAAATCAGGAAGCTGAGATCGATCTA  
CATCACTTAGAAAAACCTGTTGCAGACGCAGTTCAGCAATAATTA AAAA ACTATTCACCTGAAATGAAGA  
AGAAATGTCCAATTGAAATGAAAATTTTGTAAATGATGAGCGTCCAGTTTTCGAACGCCCAAGGCGCAT  
ATCACATGCGGACAAGTCTATTGTGCGATTCGCAAATCAAAGACTATTTAAAAGATGGAATCATTAGGCCA  
AGTTGTTTCGGAGTATGCATCACCTATAGTACTAGTGAAGAAAAAATGGAGACATGAGGTTATGTATTGA  
TTTTAGAAGACTGAACGAAATTATATGTAGAGACAACTACCCGCTACCATTGATCGACGATTTATTAGAC  
AGACTATGCGGAAAAACAGTATTTTCAAAGTTGGATCTAAAAACGGGTATTTTCATGTTTTTGTAAATGAG



CAATCTATTA AATACACTTCATTTGTTACCCCTTTAGGACAATATGAATTTCTTAGGATGCCCATGGGTTTA  
AAA ACTGCGCCACATGTATTTCAAAGATTTGTTAATAACATATTTTGTGATATGATAAAAGATAATAAGGT  
AATTGTTTACATGGATGATATTATGATAGCAAGTACAAACATAAAGGAACACATGGAGACCTTAAAGGAA  
GTGTTTATAAGACTGGTGCAAAACAAATTAGAGTTGAAATTAGATAAGTGTGAATTTTTNAAAAGCAGCG  
TTAAATATTTAGGATTTGTGGTGGATAGTAAAGGCGTTAGGGCTGATGAAAAAGGGTTAGAAGCGGTAA  
ATCCTTTCCAATACCAAACAAAATTCAGGGAGTACAAAGTTTCCTAGGGTTATGCTCCTACTTCAGGAGGT  
TCATTTTAAACTTTTCTATATTAGCTAAACCCTTATATGATTTATTGAAAAAAGATAAGAAATTCAAGTTT  
GGAGAAGAGGAGTTTAAGTGTTTTAATATGTTAAAAGATAAATTGTTAGAGGCGCCAGTACTATCAATAT  
ATAATTACAAAGAAGAAATAGAACTACATTGTGATGCCAGCGCAGTGGGATTTGGGGCTGTTTTATTTCA  
AAAAAAGAAGANAGGAAATTACACCCGATTTTTTTATTTTTCTAAAAGAACAACCGAAGTAGAGTCTAAAT  
ATCATAGTTTTGAGTTAGAAACGCTAGCCATCATTTACGCATTACGCAGATTTCTGTATATATCTGCAGGGA  
AAACGATTTAAAATAATGACAGATTGCAACTCTTTAACTTTAACGCTTAACAAAATAGATTTAAATCCGA  
GAATTGCTAGATGGGCGTTAGA ACTACAAAATTACGATTTTGAGTTAGTGCATAGATCGGGCAAGCAAAT  
GCAACATGTGGATGCGTTAAGCAGATGTTATGAGGACATTTTAGTTATTGAATCCAATAGTTTTGAGGACA  
ATTTAGTTATTTGCCAAAGCAAAGATGACAACTGGTAGATATTAGAAAGATGTTAGAAAAAGAAGAGC  
ACAAGCTATTCGAAATGAGAAATGGGGTCATTTACAGAAAAACAAATGATGGCAGATTAGTTTTTATGTA  
CCAAAGGATATGGAAGAACATGTACTTTACAAATATCATGATGAGTTGGGACATGCTGGGAGAGATAAG  
ATGATCGATGCCATTGGAAAGAGTTACTGGTTCCCATATATTAAGGAAAAAGCAATAAAGCATATAGGGA  
ATTGTTTAAAATGCATTGCCTTCGCCCCCAAGACGGGTAAGAGTGAAGGACTATTACATAGCATACCGAA  
AGGAAACAAACCGTGGGAGATGATCCATATAGACCATTATGGACCAATTAATGCAGGAAGGGCTAATAA  
ATATATATTGGCGGTGGTTGACGGATTTTCAAAATTTGTTAGACTATATACAGCAAAGACAACAAGTACG  
AAAGAAGCGATTAAGGCATTA AAAAGATTATTTTCAGAGCGTATAGTAGACCTAAGTTCATTGTATCGGACA  
GAGGGAGTTGTTTTACTGCAAAAGAGTTTGATGAATTTTTTAAAAATGAGGGAGTAACGCATATTAAATA  
GCAACGGGTTGTCCGCAAGCAAATGGTCAGGTGGAAAGGTTGAATAGAGACTTGGGTCCGATGATGGCA  
AAAATGGCGGAGCCAGAAAATGGTTTACATTGGGATGTTATTATAGAAAATGTTGAATATGCAATAAACA  
ACACACAACACAAAAGCATAAAGAAATTTCCAAGCGAAATGTTATTCGGATTACAACAGAAAGGAAAAG  
TTGTTGATGAATTA AAAAGAAAAATTAGAAGAGTTTACACAGGTGAACACGTGTGATAAAAGAAATTTAGA  
AAATATAAGAAAGAGTGGAGAAATATATCAAAAAGAAGCTCAAATCAGAAATGAAGAGCGGATTAATAA  
AAAGAAGAAAGTATCAGTAGAATATAAAATAGGTGACTATGTCATGGTAAAAAATTTTGATAGCACACCA  
GGAGTTTCAAAAAGTTAATACCAAGATATAAAGGGCCTTATAGTATAGAAAAGATTTTAAAAAATGATA  
GATACTTGTTAAAGGATGTAGAAGGCTTTCAATTATCTCGCAACCCGTACGTTGGTATCTGGAATAGCCAA  
AACTTTAAGCATTGGATGCGAAAATAGGCAATAAGCATTAGTTATAAAGATAGATACACATATAAAAGAC  
AGAGATCGGGAGCTCTCTTTGTCAGGATGGCCGAGTTGTAATAGGATAAGAGCATCATTGGTAACCCTAG  
CCAGGGTATTATAGTGTCACTATCTATGTTAATTATAACAGTACGATAAGTAAATATCGATAAAGAAAAG  
CGGCTGCAGAGAAGAAGTGGAAGGCAGTCTCTCTACAGTACTAGCAGTAAGAAGACGTGTTGTTAAAAAT  
AAAAAGGCAACCCGAACATAAGTTAAATCAACGAAGAAAATCATACTATTACAATA

>160\_rnd-1\_family-38\_\_RC\_\_Helitron

TAAGTTTGTTAAATACTTGTAAGGTGCTCAATATGTTCTTGAGCGATGTTGAAAATATAATGATTTTCGTC  
TACAATAGACAAAATATTCCTATTAGGTCTTGTAAGATATTTACAATAATTCTTTGAAATGTCTCTGGTAC  
ATTTGTCACTCCGAAAGGCACACTCACTGTCAGTATGGAGTGGCGATATGTTCCGACGGACCGAAATCCA  
GCTGACATTCTTTCTAGAGGCACTGTTCTAGCCAGTCGGAGCTCAGGTTTCATGGCCCATCGTATCTAT  
TAAATGGTCGCCTAAATTGGCCGGCGACCTGTCTGCCTAAAGCTCCAACCATGAATTGAGGAAAAGTGT  
ACTAATTCTTAAGTCTCCACATGCAGATTTAGCTCTTGATGCAAGCACGCCAACTCTTTTGGTTCCATGC  
AGCGCACATTCGGATATGTGTACAAATTTATGAAGCATCATGGACTCACTGTTGCAGACATTCATCACGGC  
ACTCGCATTCGCTTCGGGGTGTACAGAGAGCGAACTTGTGGGGTGAAATTCAGTGTCTTGAAATGCCA  
GTGTCTTTTTATTTTAGCTAGCGTTCTTGAAATGCCAGTATGACCTCCGTGTATTGGATCTTCATGATATGT  
AAACAGTATCGCTTCTAGATCTTTTTTCATTTTTTATTGTGGTCAACGGCTTGAGTAGAGCTACTTGAAATGA  
TTTTAATGTTTTGTTGCCAGACTTTTAAAAGATTCAATTGAAATTAATTTAAATATCTTTTCGCTCGGTGC  
CAGTTTGAGTTAGCTGATCTCAACTATACCGGCTTCTTTCTCAAGCTAAGTGACCTAAGTCAAATGTACCA  
TTGGTGTACAGATCGCTAACATCAATTCTTGTTATAATTTCTCTTCCAGGCTTGAAAGAACATATATTGTT  
AATACAAGCAATAACACTACTTTTCGTACTTCGTCAATTAGAAATGAATTCATATACTTTTGGCTAAGAAGC  
GTTCTCAAGAGTTTGCATAGGCAAATCTACTTAATCTTTTGCTGCGCAGGAGTTTTTCTGTTTACTTTGGTG  
CATGGTAGTGACTTTACAGGACCTTAACCTTGTAATCGTTAAGTTCAGATATTGTTATCCGGGACAATACAT  
CGGCTACGAAATTATCTCTGCCTCTTAGGTACTGTACAGTGAAGTGAAGTACTCTTCTAAATCTAGTCTCATA

CTCGTTAATTTTGAAGTTGGGTTTACCATTGAAAACAAATATGTTAATGGTCAATGGTCTGTTTTAATTGTG  
AAATGTTGACACTATATGTATGGTCGCAAATGCGTTATTGCCAGTGGATTGCTGCCAACATTTGTTTCAGT  
TGTACTTTTATTGCTTTATCCTTTTGTAAATTAACGAGAAGCATATGCTACGGGCAATTGTTTATCTCCATA  
CTTTTCAGTCAAACTGCTGCGCAGGCTAGTTTACTTCGTTTACTTTTTTGCTTCTTTGCTAAAATTTGGGT  
ATTTTAGTAAAGTAGGCTTCATAAGAGCTTTTTTTAAATATGCGAAAGCTTTTTGGCATTTCATCGGATCAC  
TCAAAAACCTCTTCAAACCTTTTTACATAATCTTGTTATGTGACGTAAATAATCTGCAACGTTCTTTATAAAAC  
GTCTGTAATTAATGACCACTTATTTTTTGTCTATCTGGCAAATACCTTGATCCGTACAGTTATGACCTAGA  
AAAGTCACTTTGTGAAGGTTCTAATCCAAAAAAGCGATGGTCATCATTCTTCGAAAAGAATTAGGCGCTA  
TTTTTAGACGCTAAATTTCTAGAATTTTCATCTAATTCTGTTTGGTGAAAACCGGACATTAAATCTAAGCAT  
GAAAAATATTTTGATCTGCCTAATTGATCGGGAATATTATCTATTCTTGGGAGTGGAATTTGTCAGATAA  
GAGTTCCTATAAAATTTGACGATAGTCTATAACTAAGCGCCATCGCTTGGTATCGGAACAAGGTAATCCCCT  
TTATGGGACAAGAAGTATAGGGCTGTTATATTCCGATACAGACGTTTCTACAATTTTATCCGAAATAAGTT  
TTTCGACTTGATTATTAACCTCCACTTTATGAGTAAGAGGAGTTTTGTAGGTCTTAATGTAAACTGGCTCA  
GTATATTTTAGTCTTAGTTTCTGTTTATAATACTTATTGGTTGTTGTGTTTCGGTTTTGAGTCCGAATATGC  
CTGTATACTTGGTGCAGAGATCTTTAAATTGTGTTTTGAATAATGGGGAAAAGTTCTTTTTTAGTTTTTCA  
TCTCCGTTTCTTGGCGATCTTTGCAAATTTCATAACTCTATCATAGTGACATAGCTTTTAAATTTCAAGGT  
CGTTAAGATTTACTATCTTTATTGAATTTGTTGTATTTAAAATTCGGACAAATGTTTGTGATTATTGGAAA  
TAATATTTCCACTGAATATTGCTTTATCAATTTCTTGATTTGAAATGAAAATATTGTTTTCTCGCGAAACAA  
TATTGATTTGACGGACTACTTCAGAACGAGCTGGAAGTATTGTGGCATAATTATCACAAGTGTGAGTTATT  
GGTAGTTTTATTGGAATAATTTAAATTTTGGCCGAAGTATTAGAGAATCACATGTTTGTGTGAAATCTAA  
TTGGCAAGTATACTTTTTTGAATGACATATATTCCGGTAGATAATTCACGAACGCAGGCAGAAGGAAG  
CATCTACGACCCTATGAAGTATATATAGAAATATATATCAAAATTTTAAACGTAGGTGCTCCTAGTGCCTG  
CGCAGATCGAGTTTGTTCNATAATCGATAACTTACTCCGTTTCAAGCAATCGATAAAAATCGATATCGA  
TATCCTGCTTTTAGGGCAAATTTGGTAAATAATAAGAGCTAGAGTCACCAACATGACATATAGCTTCTTA  
AATAGAATATATATATGCATTTGATGTTAGGAGAAGAGGGTTCAGGGTATCGTCTAATCGGAAGCTCCCG  
ACAAGAACATCTTACTTGTTTAATTTATTTGATCTTGAAATAAGTGGGTTCAGGGTATTTCTAGTCGGGA  
GCTCCCGACTAGAACCTCTTACTTGTTGGGTTTTTCGCCGTTAAGACTTTTTGACTTGCTAAATCTGGGTGT  
CATTTTATTACGTCGATTTTCTTATCTTCTATTTTATATTCTTTACGCTGTTATACCCTTGCAAGGGGTATTA  
TAATTTTGTCTGTAATGTGTAACGCATAGAAGGAGACATCTCCGACCCCATAAAGTATATATATTCTTAA  
TCAGCATCAACAGCCGAGTCGATATAGCCATGTCCGTCTGTCCGTCTGTCTGTTTCTATGCGAACTAGTCC  
CTCAGTTTTTAAAGCTATCTTAATGAACTTTGCAGAACTCCCTCTTTCTGTTGCACGCAGCACATATGTGA  
AAACCAGCTGGATCGGACCACTATATCATATAGCTGCCATAGGAACGATCGGTGCGAAAATTAAGTTTTTG  
TATGAAAAAACATTTTGTATTATCAAGATATCTTGACCAAACCTCGGCATTTATTAGTTTTACTTTACTCCTCA  
TATATATGCAAAATCCTATTAAGATCGGACCACTATATCATATAGCTGCCATAGGAACGATCGGTGCGAAA  
ATTAAGTTTTTGTATGAAAAAACATTTTGTNTCAAGATATCTTGACCAAACCTCGGCATTTATTAGTTTTA  
CTNACTCCTCATATATGTGCAAAATCCTATTAAGATCGGACCACTATATCATATAGCTGCCATAGGAACG  
ATCGGTGCGAAAATTAAGTTTTTGTATGAAAAAACATTTTGTNTCAAGATATCTTGACCAAACCTCGGCAT  
TTATTAGTTTTACTNACTCCTCATATATATGCAAAATCCTATTAAGATCGGACCACTATATCATATAGCTG  
CCATAGGAACGATCGGTGCGAAAATTAAGTTTTTGTATGAAAAAACATTTTGTNTTCAAGATATCTTGACC  
AAACTCGGCATTTATTAGTTTCACTGTACTTCTCATATATATGCAAAATCCTATNAGGATCGGACCACTAT  
ATCATATAGCTGCCATAGGAACGATCGGTGCGAAAATTAAGTTTTTGTATGAAAAAACATTTTGTNTTCAA  
GATATCTTGACCAAACCTCGGCATTTATTAGTTTTACTNACTCCTCATATATGTGCAAAATCCTATTAAGAT  
CGGACCACTATATCATATAGCTGCCATAGGAACGATCGGTGCGAAAATTAAGTTTTTGTATGAAAAAACAT  
TTTGTNTTCAAGATATCTTGACCAAACCTCGGCATTTATTAGTTTTACTNACTCCTCATATATATGCAAAA  
TCCTATTAAGATCGGACCACTATATCATATAGCTGCCATAGGAACGATCGGTGCGAAAATTAAGTTTTTGT  
TGAAAAAACATTTTGTNTTCAAGATATCTTGACCAAACCTCGGCATTTATTAGTTTTACTTTACTCCTCATA  
TATATGCAAAATCCTATTAAGATCGGACCACTATATCATATAGCTGCCATAGGAACGATCGGTGCGAAAAT  
TAAGTTTTTGTATGAAAAAACATTTTGTNTTCAAGATATCTTGACCAAACCTCGGCATTTATTAGTTTTACT  
TTACTCCTCATATATATGCAAAATCCTATTAAGATCGGACCACTATATCATATAGCTGCCATAGGAACGAT  
CGGTGCGAAAATTAAGTTTTTGTATGAAAAAACATTTTGTNTTCAAGATATCTTGACCAAACCTCGGCGTTT  
ATTAGTTTTACTTTACTCCTCATATATGTGCGAAATCCTATTAAGATCGGACCACTATATCATATAGCTGCC  
ATAGGAACGATCGGTGCGAAAATTAAGTTTTTGTATGAAAAAACATTTTGTNTTCAAGATATCTTGACCAA  
ACTCGGCATTTATTAGTTTTACTTTACTCCTCATATATATGCAAAATCCTATTAAGATCGGACCACTATATC  
ATATAGCTGCCATAGGAACGATCGGTCCAAATTAAGTTTTTGTATGAAAAAACATTTTGTNTTCAAGATA

TCTTGACCAAACCTCGGCACTTATTAGTTTTACTTTACTCCTCATATATATGCAAAATCCTATTAAGATCGGA  
CCACTATATCATATAGCTGNCATAGGAACGATCGGTGCGAAAATTAAGTTTTTGTATGAAAAAACATTTTGT  
TTTTCAAGATATCTTGACCAAACCTCGGCATTTATTAGTTTTACTNTACTCCTCATATATGTGCAAAATCCTA  
TTAANATCGGACCGCTATATCATANAGCTGCCATAGGAACGATCGGTGCGAAAATTAAGTTTTTGTATGAA  
AAAACATTTTGTTCATGATATCTTGACCAAGCTCGGCATTTATTAGTTTTACTATGCTCCTCATATATAT  
GCAAAATCCTATTAAGATCGGACCACTATATCATATAGCTGCCATAGGAACGATCGGTGCGAAAATTAAGT  
TGTATGAAAAAACATTTTGTATTATCA  
>160\_rnd-1\_family-190\_\_LTR\_\_Gypsy  
CCCAAATAAACGATGAAAAAGAGATACAACAAATACTGTCTACATACCATGACGACCCAATTCAAGGAG  
GCCACAGTGGCATAACAAGAACGCTAGCAAAAATAAAAAGACACTACTACTGGAAAAATATGACGGGTC  
ATATAAAAGAGTACGTACGTAGATGCCAAATGTATAAAATAAAGACACACACAACAAGTAGGAGCTTGT  
AGTCGGGAGCTCCCGACTAGGGGACACCCTGAACCCTCTACTTCCAACATCAAATGCATATATATATTCTA  
TTTTAAAAGCTATATGTCAAGTTTGGTGACTCTAGCTTTTATTATTTTCCAAAATTGGCCAAAAAAATAGG  
ATATCGATATCGTTTCTTATCGATTGCTTGGAAACGGAGTAAGTTATCGATTATCGGAAACAAACTCGATT  
TGCGCAGGCACTAGGAGCAACTACATCTAAAATTTCAAGTCTCTAGCTCTCATAGGTTCTGAGAACCTTGC  
GTTTCATACATACGGACGGACGGACGGACGGAGGGACGGACGAATGGACAGACAGACGGACATGGCTAGA  
TCGACTCGGCTATTGATGCTGATCAAGAATATAAAATACTTTATGGGGTTCGAAGATGCTTCCTTTTGCCTGT  
TACATACATTTGGATTTAAATAAATAAATAATGTCAACAAAAAGTTAATAAAGAATATATATATTTAATGG  
AATGGAATGAAATTGTTTCTATATTAAGCAAACGTTCTGAGCTTGATAGATCATTAAAGTGCCTCAATAAA  
AGTGCCTAATATCAAACCAAACAAAAATAAAACATGTTTCGAGTTCTGGTAGAATCATACAACAGAGTAC  
GTGACATTGTAAACAACAATGGACGTAGGTTAAGCGATTTATATTTAACACAATCAATTGACGTGTTAAA  
AAGGCTACGTGAAAATATTAGACATATTTTCGGAAAGACATAATTTTCAAATTTTGTTCGCGCATGCGCTAAA  
TACACCGGCAACATTCGAAATCACTGATTTAATGATATCAGTAGAAGAAGNAATTCGANCAAAAGCAAG  
AACAAATCGAAATAGTCGACATGGCNCAAACAGCNGTAGANTTTNTCAAGCTAGCCNCATCTCTGATACC  
AGAGTTTGACGGCAAGCCGGAAAAATCTACAAAGCTTCCTAGATNCTCTGAATCTGNTAGANNCCCTAAAA  
GGNACACACGAAGCTACCGGCCGTAAGCCTTATNAAGACAAAACCTAAAAGGGCCATGCCAGGAACCTGA  
TAAGTGATGAGNANACNATTGCNGCNNTCATNNCGNAACTATCGGACGNAGTAAAAGGAGAGTCGGTAG  
AAGTTGTNTCTGCTAAGCTTCTAAACTTGCAACAGAAGAGCAAAACGGCCAACCAATACACCCAAGAGGT  
GGAAAAACGGCAAAGGCCCTTGAAGNGCCTATATCAGTGAAGGTCTAAGCCAATCACTTGCAAAACAA  
ATACAGCTGTAAAAGCTATGACCCAAAATTGTTTCGATTGATAAGGTAAAACCTTATCATGCAGGCAGGCAC  
ATTCACAAATATGAATGATGCCGTCTCCAAATTTGTCAATAGTTGCACGGAGGTAACAGGTCAAAGTAAC  
ACTGTCCTGTATTATCGACGAGGTGCAAATNACAATAATAGAGGAGGCCGAGGTTATAATCGTGGCAGAA  
ATTACAACCACAACAATTACAACCGAGGCGGTAACAACAACAACAATAATTACAATAACCGTGGAG  
GAAGACGAGGCCAAAATCGAGGAAGAGGCCAACCAAGGTNACAATAATAACAATGTGAGAGTGCGCGCA  
AAATACGCCGGAAAACTCTCAGAACCCTTTAGGAAACAACCAGTAAATGCAAAGGTTTCATTCCATCAATT  
ACAGTCTTAATATATTTGTCACTTTTTATAATCATTCAACTGAAAATAAACTCACATTCCTAATAGATACTG  
GTGCAGATATCTCACTTTTAAAAATAAATTCAGATAATTTCAAATTCAGAAGANAAAATTATAAACAT  
CCAAGGCATNGGCCAGGGTGTAATAAAATCNCAAGGAACAACCTTCAATAGAACTTCAATCAACAAAATA  
TATTATTCCACACGAATTTCAATTTAGTAGACTCNGATTTTTCAATACCGTGTGATGGAATAATAGGCATTG  
ATTTTATTAAAAAATTCAATTGTCAATTAGATTTCAAACCAAGTGAAGACTGGTTTATAATTAGACCTCAA  
AACTTAAATTATCCTATTTATGTTCCGATAACATATAGTGCTGGCAACAATGCATTTCTTCTGCCAGCCAG  
ATCCCAAGTAATTCGAAAAATAGACATTAATTCAGTAAACGATTATATATTTGTTCCAAATCAAGAAATA  
CATAATGGAATTTATGTTGCAAATACAATAGCAGCATCCAAACATGTATACATTGCTTCTAAACACAAC  
TAATTTTCGACCAATTGGTCAAAGTAAACAAAATCGAATATGAAAATTTAACAGATTACGATATTCATAAC  
ACTAATCCAGAAAAATAGAAGCGAACAAGTACTTTCAAAGTTAAAGAAAAATTTTCCAGAACAAATTCAGAA  
ATCAATTAACAGAATTATGCACCAAGTATAGTGATGTGTTTCGGACTGGAAACCGAACCAATAGCGACAAA  
TAATTTTTTATAAACAAACATTAAGACTTAAAGATGATGAACCCATTTATATCAAAAACCTACAGAAGCCCG  
CATAGCCAAGTTGAGGAAATCCAAAAACAAGTAGGGAAATTAATAAACGACAAAATCGTAGAACCGTCT  
GTATCCGAGTATAACAGCCCACTCTTGCTAGTTCCGAAAANATCATTACCAAATTCGGAAGAAAAGAAAT  
GGCGATTAGTAATTGACTATCGCCAAATCAACAAAAAATTACTTTCTGACAAATTCCTCGCTCCCCAGAATT  
GATGATATTCTAGACCAACTGGGCAGAGCTAAATACTTTTCATGCCTTGACTTAATGTGAGGTTTCCACCA  
AATTGAACCTGAAGAAAATTCAAGAAATATAACATCTTTTTCAACGAGCAATGGCTCATATCGCTTCACGC  
GATTACCATTTGGTCTTAAATAGCACCAAATTCATTTTCAGAGAATGATGACTATAGCATTCTCGGGTTTA  
GAACCCTCTCAGGCATTCTTTATATGGATGACTTAATGGTGATAGGATGTTCCGAAAAACACATGATTAA

AAACTTAACTGATGTTTTNAATGTATGTAGGAAATATAACCTAANGTTGCATCCAGAAAAATGTTAATTTT  
TCACGCATGAAGTGACATTCTTAGGTCACAAATGCACTGACAAAGGAGTATTGCCAGATGACAAGAAATT  
CGACGTCATCAAAAATTATCCTGTCCATGATGCGGACAGCGCGAGACGATTTGTAGCATTCTGCAATNATT  
ATCGTCGATTTATAAGAACTTCGCCGATTATTCACGGCACATAACTAGATTATGTAAAAAGAATGTTTCT  
TTTGAATGGTCAAGTGAATGCCAAAACGCATTCCAATACCTTAAAGAAAAGCTTATGCATCCCACATTATT  
ACAATATNCTGATCTTCGCAAAGAATTTTGCATTATAACAGATGCTAGTAAACAAGCTTGCGGAGCGGTT  
CTAACTCAGAACCGTGACGGAATTCAGCTCCCAATAGCTTATGCATCTCGTTCATTTACAAAAGGGGAAA  
GCAATAAGAGCACAAACAGAACAAGAGTTAGCGGCAATTCATTGGGCAATTACCCATTTTAGACCATATAT  
TTATGGCAAACACTTTACTATTA AAAACGGATCACAGACCATTGACATATCTTTTTTCTATGACTAATCCCA  
GCTCGAAATTA ACTCGCATGCGGCTAGAGCTTGAAGAATACGACTTCACAGTAGAATACCTAAAGGGGAA  
AGATAATTTTCGTAGCAGACGCACTTTCGCGTATTAATATAAAAAGAACTCAAAGATATGCAACATAAAGTC  
CTGAAAGTCACTACCAGGCGACAAAGTAGACAAAATAAAAACTGTACAGTAGAAAATTATGAACTTCTGC  
CAAGGCAAAGTCATAAAAATGTATCTAAGCCCAACGTACATGAAGTCATTACAAATGATGAAGTACGAA  
AAGNAGTGACCTTGCGCATAACAGAATCTAAATGTTTATTTAAACATGGAATAAAAATTATCGCAAGAAT  
TGAAGTTAGCGATTTATATACTAATGGAATCCTCGACCTAGGTCAGTTCTTCCAAAGGCTCGAAANAGAG  
GCCGGTATATTA AAAAATCAGCCAACTCAAAGTGCCGCCGAGCGAAAAGGTCTTTGAATCAGTTTCAATAG  
ATTATTTTAAAAATNTGGGCAATAAAAATATTA AAAATCTTTAAGAGTAGCGCCACTCCAGCCGGTGACCCA  
AATAAACGATGAAAAAGAGATACAACAAATACTGTCTACATACCATGACGACCCAATTCAAGGAGGCCA  
CAGCGGCATAACAAGAACGCTAGCGAAAATAAAAAGACACTACTACTGGAAAAATATGACGCGTCATAT  
AAAAGAGTACGTACGTAGATGTCAAAAATGCCAAATGTCTAAAACAAAGACGCACACAAAAACTCCTTT  
GACTCTCACAGAAACACCTGTGAATGCTTTCGATATAGTGATAGTGGATACAGTTGGTCCGCTACCTAAAT  
CGGAAAATGGCAATGAATACATAGTCACATTAATATGCGACCTTACAAAATATTTAGTAGCCATTCCAAT  
AAAAAGCAAAAGCGCAAATAATGTGCGAAAAGCTATATTCGAAAATTTCACTACTCAAGTTTGGTCCAATG  
AAGACGTTTCATCTCGGACATGGGAACAGAGTATAAAAACCAGATTTTAACTGATTTATGCAAGTATATGA  
AGATCAAGAATCTCACCTCTACTGCATATCATCATCAAACATTAGGGACAATAGAACGAAGTCATCGAAC  
ATTTAATGAATACATTCGTTTCATACATCTCTGCAGACAAAACACTGACTGGGATGTCTGGATTCAATATTTCA  
CATATTGCTTCAACACTTCGACACCATCAGCAACGCATGAGTATTGTCCATACGAACTAGTATTTGGCAGA  
CTACCAAAAACAGTTCATAGATTTAAATAAACTAATTACATAGATCCTATTTATAATCTAGATGACTACTC  
TAAGGAAATAAAGTTTCGATTAGAAATAGCATATAAAAGAGCTAGAATTATGTTAGAAAAAGCCAAGGC  
TTATAGGAAATTAGCATACGATGAAAAAACAAAAAATTTTGAATTA AAAAATAGGAGATAAAGTACTTAN  
AAGAAACGAAACAGGCCACAAATTAGACCCAGTATATTTAGGACCATATATAGTAGAGAAAATAGAAGA  
TAATGATAACATTTACATTAAAGATAGTAAGAATAAGAAACAAAAAGTACATAAGGATAGGTTAAAAAT  
ATATAATC

>160\_rnd-1\_family-33\_\_Unknown

CAATGCGTTAGCAATTGTCAAACATAAAGGCGTTTTGTTTACACATGGGGAGATATGTCGTTTCAAAAAC  
GACATATCTCCATGATCTCCGGGATTCAAGAAGATATGTCGTTTCGAAACGACATATCTCCATGATCTCCG  
GGATTCAAGAAGATATGTCGTTTCAAAACGACATATCTCCGCGATCTCCGGGATTCAAGGAGATATGTCG  
TTTCAAAACGACATATCTCCGCGATCTCCGGTCACGGAGATATGACGTTCCAAAACGACATANCTCCGCG  
NGGAGATATGNCGTTCTAAAACGACATATCTCCCCGNGGAGATATGTCGTTTCAAAACGACATATCTCCG  
TGATCTCCGGGATTTCANGGAGATATGNCGTTTCAAAACGACATANCTCCGCGATCTCCGGGANCGCGGAG  
ATATGACGTTTTTAAAACGACATAACTCCGCGCGGAGATATGACGTTTTTAAAACGACATAATCTCCGCGAG  
ATATGACCTCCGCGCGGAGATATGTCGTTTTTAAAACCGNCATATCTCCGCGCGGAGGTCATATCTGCGTAG  
GCTTCGTAACCGNTTACAAAAGGTATAAAAATTNTAAAATCCGACGATATTTACCCGAGATATTCAAAAA  
AAATCATCGAAAAAGTTTTTGATTTTCGAACCGACCCCGATTTTNAGAAAAAACGTGATGTAACCCCTTGCT  
TTTTTTTGGTCGATTTNGGTCAAATTTAGATTTTCAATTTTGAACGCCAATCGATAGTATTGATCCCCAC  
GAGTCGAAAATGGTATANCATTNCAAATCGGACATTATTTGGCCGAGATATTCAANAAAATCATCAAAA  
AAGGTNGACTTTACCAACGAATCGATTTTTTGGTCAACAACTTTTTTTAGGCCATCGATTTTTTGATTCTGTTG  
AATGCAAATCGATAGTAGNGATCCGTACGAATTNAAAAAGGTATANCATTCCAAAATCCGACGATATTTA  
CCCGAGATATTCAAAAAAAACATCAAAAAAGNTTTGACTTTTGAACCGACCTCCGATCTCCGCGAGAAGA  
TATTGNCGTTCCAAAACGACATANCTCCGCGCGGAGATATGACGTTCCGAAACGACATAACTCCGCGCGG  
AGATATGACGTTCCAAAACGACATAACTCCGCGCGGAGATATGACGTTCTAAAACGACATANCTCCGCGN  
GGAGATATGAGAGATATGTCGTTTCGAAACGACATATCTTCTTGAATCCCGGGGATCGCGGAGATATGNC  
GTTTTTAAAACGACATATCTCCTCGAATCCCGGAGATCGCGGAGATATGTCGTTTCGAAACGACATATCTCC  
TTGAATCCCGGAGATCGCGGAGATATGNCGTTTTTGAACGACATANCTCCTCGAATCCCGGAGATCGCGG

AGATATGTCGTTTTTTGAAACGACATATCTCCNCGCGTATGACCTTCCAAATCATCACGATTTTTTTTCAAAA  
TCGAGGTCAGTGCGAAAATCGAAACTTTTTTCGATGATTTTTTTTAATATCTCGAGTAAATAACGCCTGATT  
TTGGAATGTTATACTTTACCAACAAATCGATTTTTTGGTCAACAACTTTTTTAAGGCCATCGATTTTTTGATTT  
ATTTGAATGCAAATTGAAAGTAGGGATCCGTACGAATTGAAAAAGGTATAAAATTATAAAATCCGACGAT  
ATTTANCCGAGATATTCAAAAAAAACCATCGAAAAAGTTTTGATTTTCGAACCGACCCCGATTTTAAGAA  
AAAACGTGATGTAACCCCTTGCTTTTTTGGTCGATTTTGGTCAAAATTTAGATTTTCAATTTTTGAACGCCA  
ATCGATAGTATTGATCCTCACGAGTCAAAAATGGTACATCATTCCAAAATCGGACATTATTTGGCCGAGAT  
ATTCAATAAAATCATCAAAAAAGGTGGACTTTACCAACAAATCGATTTTTTGGTCAACAACTTTTTTTAGGC  
CATCGATTTTTTGATTTGTTTGAATGCAAATTGAAAGTAGGGATCCGTACGAATTGAAAAAGGTATAAAATT  
ATAAAATCCGACGATATTTACCCGAGATATTCAAAAAAAACNATCGAAAAAGTTTTGATTTTCGAACCGA  
CCCCGATTTTAAGAAAAAACGTGATGTAACCCCTTGCTTTTTTGGTCGATTTTGGTCAAAATTTAGATTTTC  
AATTTTTGAACGCCAATCGATAGTATTGATCCTCACGAGTCAAAAATGGTACATCATTCCAAAATCGGAC  
ATTATTTGGCCGAGATATTCAATAAAATCATCAAAAAAGGTGGACTTTACCAACAAATCGATTTTTTGGTCA  
ACAACCTTTTTTTAGGCCATCGATTTTTTGATTTGTTTGAATGCAAATTGAAAGTAGGGATCCGTACGAATTG  
AAAAAGGTATANAATTATAAAATCCGACGATATTTACCCGAGATATTAAAAAAAACACTATCGAAAAAGTT  
TTGATTTTCGAACCGAACTCCGAACCTCCGCGCGGAGATATTGACGTTCCAAAACGACATAACTCCGCGCG  
GAGATATGACGTTCCAAAACGACATAACTCCGCGCGGAGATATGACGTTCCAAAACGACATAACTCCGCG  
CGGAGATATGACGTTCTAAAACGACATAACTCCGCGGGGAGACATGAGAGATATGTCGTTTTGAAACGGC  
ATATCTTCTTGAATCCCGGAGATCATGGAGATATGTCGTTTTGAAACGACATATCTTCTTGAATCCCGGAG  
ATCATGGAGATATGTCGTTTTGAAACGACATATCTCCCGAGTCCCGGAGATCATGGAGATATGTCGTTTT  
GAAACGACATATCTTCTTGAATCCCGGAGATCATGGAGATATGTCGTTTTCGAAGCGACATATCTCCCAT  
GTGTGAACAAAACGCCTTTATGTTTGACAATTGCTAACGCATTGCTTCTCTTATGAATAAAGGGTATCTTG  
TGCAATTATGAAAGGATTTGCGATATCAGATAACGACGCGCGGAGGTAATATGTCGTTTCGAAACGACAT  
ATCTTCTTGANTCCCGGAGATCATGCAGATATGTCGTTTCGAAACGACATATCTTCTTGAATCCCGGAGAC  
GTTCCAAAACGACATAACTCCGCGCGGAGATATGACGTTCCAAAACGACATAACTCCGCGCGGAGATATG  
NCGTTCTAAAACGACATANCTCCGCGGGGAGACATGAGAGATATGTCGTTTTTAAAACGACATATCTCCNT  
GAATCCCGGAGATCATGGAGATATGTCGTTTCGAAACGNCATATCTTCTTGATCCCGGAGATCATGGAGA  
TATGTCGTTTCGAAACGACATATCTCCTTGAATCCCGGAGATCATGGAGATATGTCGTTTCGAAACGACAT  
ATCTCCCGNGTGTGAACAAAACGCCTTTATGTTTGACAATTGCTAACGCATTGCTTCTCTTATGAATAAA  
GGGTATCTTGTGCAATTATAAAAGGATTTGCGATATCAGATAACGACGTGCGGAGGTACATATGTCGTTTC  
GAAACGACATATCTTCTTGAATCGCGGAGATCGTAAGAGACCCCGATTTGAAGAAAAAACGTGATGTAAC  
CCTTTGCTTTTTTGGTCGATTTTGGTCAAAATTTAGATTTTCTATTTTTTGAACGCCAATCGATGGTATTGAT  
CCTCACGAGTCGAAAATGGTACATCATTCCAAAATCGGACATTATTTGGCCGAGATATTCAANAAAATCA  
TCAAAAAAGGTGGACTTTACCAACAAATCGATTTTTTGGTCAACAACTTTTTTTAGGCCATCGATNTTTGAT  
TTGTTTGAATGCAAATTGANAGTAGGGATCCGTACGAATTGAAAAAGGTATAAAATTATAAAATCCGACG  
ATNTTANCCGAGATATTAAAAAAAACCGTCGAAAAAGTTTCGATTTTCGAANCGACATCTCCTGAACT  
CCGGGATCGCGGAGATATGNCGTTTCGAAACGACATANCTCCGCGCGGAGATATGNCGTTCCGAAACGAC  
ATAACTCCGCGCGGAGATATGNCGTTCCAAAACGACATANCTCCGCGCGGAGATATGNCGTTCTGAAACG  
ACATATCTCCGCGNGGAGACATGAGAGATATGTCGTTTCGAAACGACATATCTTCTTGAATCCCGGAGAT  
CGCGGAGATATGTCGTTTCGAAACGACATATCTCCTTGAATCCCGGAGATCGCGGAGATATGTCGTTTCGA  
AACGACATATCTCCTTGAATCCCGGAGATCACGGAGATATGTCGTTTCGAAACGACATATCTCCTTGAATC  
CCGGAGATCGCGGAGATATGTCGTTTCGAAACGACATATCTCCNCGCGGTGAATTACGCGNCTTCAAGAC  
GACATATCGCTACGCATNGCTTCTCTTATGAATNNAGGANATCTCGTGCCGTTNTAAAANGATTTGCGATA  
TCGNATAACGNCGCGCGGAGTAATATGTCGTTTCGAAACGACATATCTTCTTGAATCCCGGAGATCATGG  
AGATATGTCGTTTCGAAACGACATATCTTCTCGAATCCCGGAGACGTTCCAAAACGACATAACTCCGCGC  
GGAGATATGNCGTTCCAAAACGACATANCTCCGCGCGGAGATATGNCGTTCCGAAACGACATANCTCCGC  
GNGGAGACATGAGAGATATGTCGTTTCGAAACGACATATCTTCTTGAATCCCGGAGATCACGGAGATATG  
TCGTTTCGAAACGACATATCTTCTTGAATCCCGGAGATCATGGAGATATGTCGTTTTGAAACGACATATCT  
TCTTGAATCCCGGAGATCATGGAGATATGTCGTTTTTCGAAACGACATATCTCCCGTGTGTGAACAAAACG  
CCNTTATGTTTGACAATTGCTAACGACATTNCTTCTCTTATGAATAAAGGGTATCTTGTGCAATTATAAAA  
GGATTTGCGATATCGGATAACGACGTGCGGAGGTAATATGTCGTTTCGAAACGACATATCTTCTTGAATCC  
CGGAGATCATGGAGATATGTCGTTTCGAAACGACATATCTTCTTGAATCCCGGAGATCATGGAGATATGT  
CGTTTCGAAACGACATANCTCCGCGCGGAGATATGACGTTCCGAAACGACATACTCCGCGCGGAGATATG  
NCGTTCCGAAACGACATANCTCCGCGGGGAGACATGAGAGATATGTCGTTTTTGAACGACATATCTTCTT

GAATCCCGGAGATCATGGAGATATGTCGTTTTGAAACGACATATCTTCTTGAATCCCGGAGATCATGGAG  
ATATGTCGTTTTGAAACGACATATCTTCTTGAATCCCGGAGATCATGGAGATATGTCGTTTTGAAACGACA  
TATCTTCTTGAATCCCGGAGATCATGGAGATATGTCGTTTTGAAACGACATATCTTCTCGAATCCCGGAGA  
TCATGGAGATATGTCGTTTCGAAACGACATATCTCC

>9\_rnd-6\_family-1139\_\_LINE\_\_R1

AAAACAAAAGATAAGGTGCAGGTGTTTCGCTTTGGCGTAAACAAAGCCATAAAACTTAACGGGACAACCTT  
GCGGTAAATAGCAATAAAACTGCTTGTGCCCAAGACAGCGCGAAAGCAGTGCAAAGCAGTGCAAACGCG  
TTCAGTGTCTTATAAGCAGTGACATAGTGCGAAGCAGTGCGGAATTTTAAAGCAGTGCAAAGCTGAGT  
AAAGCAGTGCAAAGCAGCGCAAATAGAGCAGTGCGGTTCGTCAACCAGGTAAGCGGTTTGTGTCCGGGTTA  
TCGCGTGGTGTGTCGACGGAGGGCGCCACGACAATGGACGCCAGAAGCGTGGCCGGCACGGCGTCCAG  
TGCCGAGTCGGTTGCCAGCGTCGCCGCCGATGGAAGGAGGAGGGTGGGGAGGGAGGGGCCGTAGTACGA  
TTTCNCCCCTGCGTACCCGTTGAGCCGAAGAGGCAGGCGTTGGAAAGCGCGGATGAGTTTGCCAAGCCC  
GCCACTAGGGCTGCTGCAAAGAGCCGCTGATGCTGCCGCCGCGAGAAGAAGACGTCCGGAGCCGCTGCCG  
CTGCCGCCCCCATCATCGCGCTTGCCCCAGCATGGAGGATAATGGCCGAGGGGACAGGGGGCGATTATAGC  
GGAGCTTTCGGCAGCTGCCGAAATGACCCGCCTTGCCCTGGTGGGTGTGCCCCCGAAGCCGCGCGCGAA  
GTGTGCGCAGCCGTTAAGCGATTGGAGGAGCTGTCCACGTCGCTGGCAGTGCGGAACGCTCTGCTCGAGA  
GCCTGGCAGGCAGATCGTCTGCAGCACAGCTCGCCGCCCCACCCCAACTGCTGCTCACCGTCGTCCACC  
AGTTGCCACCATGCTGCCCGCACCGCTGTCCCCGTCCCAGGAGTGCCGATCGCTGCCCCACGGATCAAC  
AAGCCAGTTGAGACGTGGTCCGCGGTGGTCACGAGTCGGGACCCGAGCGAGTCGGGCAAACGGTAGCG  
AAGAAGATCATGGAGGAGGTGCGACCATCACTTGAGAGTGCGGGTGCACGANGTGCGAGAGCTCAAGCGA  
GGCGGCGCGGTATCCGCACGCCATCGANGGGCGAGCTAACAGAGTGGTGGCGAACACCAAGTTCGCG  
GAGGTTGGACTCAACATCCAGCCGAACAAAGGATTGAGGCCGAGGGTAACGGTGTTTCGACGTGGACACG  
TCGATCCTGCCCGAGGTGTTTCATGGAGGAGTTGTATACGAACAACNTCAAGGAGGAGATGACAGCAGCG  
GCGTTCAACAAGGCAGTACACCTTGAGTCGAAGCCGTGGTCCGTCACTGATGGCGCCAGCGTTAATCTGA  
CGCTAGAAGTTGACGAGAGGGCCCTGGCGACTTTTGAAAAGACCGGACGGGTCTATATAAAGTGGTTTTTC  
ATACCGATGCCGGTCCCTCGTCCGCACCTATGCTTGCCATAGGTGTGTGCGCTTCGACCACAAGGTGTCCG  
AGTGCCGCCTTAAGCAGGACGTATGCCGACAGTGTGGGCAGATGGGGCATATCGCAGCCAAGTGCGCAA  
ATCCGGTGGACTGCCGGAATTGCCGCTTCAAGGGGNTACCCTCGGGGCATTATATGCTTTCGGGGTCTTGC  
CCGATTTATGGCGCAGTGTTGGCGAGGGTGCAAGCTAAACATTAATGTTTAGTTTCATCCAAGCCAACTGT  
GGCCGGGGCCGCGCTGCGTGCATCGATATCGGTGTACGTATGCGTGACCACGGCCACTCCTTTGCGCTGCT  
GNAGGAGCCATACTCGGACGTCGNTGGAAGAGATTACGGGCTTCCCAGCCGCGCGTTTTTCGGAAGCCACG  
CTGTGCGGGGACCGGAAAAGGAGCGCTGCTGTCATCATCGACGACCCGGATGCCATCNGCCTACCAGTGGA  
GTCGCTGACCACCGAGGCTGGAGTATGCGTGAGGGTACAGGTAAACATGGCACNGTTTACCTGACCTCC  
ATATACTGCCATGCTCATGCTGACTTGACGAGGATATTGAGCTATATGATGCCNTACTGCTACTGGCGAGC  
AGTACGCCGGTAATTCTCAGCCTGGGCGCAAACGCTGTGTCTCCNTGTGGTTCAGCAAACGGCAATTCTT  
TCGTGGCCAGCTGAGCTACAGAAGAGGCGAACAGCTGGTGAGTGGAATACTCGGAAGTCGTGCCNACGTG  
CCAAACCAAGTCAGCGAGGTGTACACGTTTCGATAATGGAAGAGGACAGAGCGATATCGACGTAACAATC  
GTGAACGAAGCAGCGTCTACGTGGGCCGCGTATGACTGGAGTGTGGACGAGTGGGATTTGAGCGACCAC  
AACATGATCACTGTTGTGACGTCGCCATCCCCAGCAAATGCAGTTGAGAGCTATGCTCCTGTGCCGTCCTG  
GAAGCTCGCGAATGCTAATTGGCGATTGTTTCGACCCGGAGCTGGTAGAGGAAATCGAGGAGCACCTTTCC  
CAGGAGGACATTAGGATGTTGCCGTTGGATNCCGCGGTGTCTGCCCTACGCCTTGCCGTACAGTCTGTGTG  
CGACAGAGTGTTAGGCCGCGAGNCCGTCGAGAGCCCAGGGAAAAGTTAAATGGTGGACTGCCGAACTGAG  
TACCAAACGCCGGGAGGTGAGGAGACTGAGGCGGAGNCTCCAGGATGCACGGCGCAGAGGCCACGAATC  
TGCGCCGTATCTTGACGCTCATCTGCGGACAGCCGTCCGCGAGTTCAGGACGCTCATCCTGAAGACGAAG  
GAGGAAAACCTGGCGACGCTTCGTTGGAGACCACAGAGACGATCCGATGGGGGCACGTCTACCGGATATG  
CCGGGGACGAAAGCGGTCTACCGATTTGAGGTGCCTTCGTTCCGATGGCGGGCTGGTTCGTAACATGGCAC  
GACTGCGCGAGTCTCCTCCTCCACAGCTTTTTTCCAGTTGCGGAGTCGAGTGAAGACATCGTCATTCCGGA  
CGAAGCTGCTCCAGCGCTCGATGCAGCTTTCGAGGTCGGAGCATGCGTCGCTCGGTTGAAGAGCAGGCGC  
TCTCCCGGGCTTGACGGCATTACAGGTGGGATCTGCAAGGCGGTATGGCGTGCCATCCCCGAGCACCTGA  
CAGCGTTGTATTCCCGCTGCCTGGCAGAAGGATACTTTCCCCTTGAGTGGAAGTGCCCGCGTGTGGTTGCG  
CTCCTCAAGGGCCCCGACAAGGATAGGAGCGATCCAGCTTCCTATCGGGGCATCTGCCTGTTGCCAGTGTT  
TGGCAAAGTGCTTGAGGGGATCATGGTGGATCGAATGAAGGAGGTGCTTCCGGATGGAAATAGATGGCA  
ATTTGGCTTTCGACCTGGACGCTGTGTGCGAGGACGCCTGGAAGCACGTGATGACCAGCGTTGCCGCCAGC  
CAGGCGGTATACGTACTTGGTCTCTTCGTGGACTTTAAAGGCGCCTTTGACAACATTGAGTGGAGCGCCGC

GATGCGCCGCTTGATCGATGCGGGATGCAAGGAAGCTAGCTTGTGGAGAAGCTTCTTCTGTGGCAGGAAA  
GCCAGGATGACCAGCAGATGTGGCGAAGTCGAGGTGGAGGTCACGCGAGGGTGTCCCCAGGGATCCATC  
AGTGGGCCGTTTCATCTGGAACACCATGATGGATGTCCTGCTCCAACGCCTGGAGCCCTTGTGCACATTTAG  
TGCATATGCCGATGACCTGCTGGTTCTTGTGCGAGGGAAGGTCGAGAGCTGAACTGGAGCGTCGAGCAGCT  
GAGCTGATGTCCGTCGTGGGAAGTTGGGGAGCCGAGGTCGGAGTGTGATCTCAACCAGCAAGACGGCA  
ATGATGATGTTGAAGGGGCGTTTTGCCGTTTCCAGGCCGCCCGTGGTACGGTTTGCAGGAGCAAGCCTAC  
CATATGTCGACAAGTACCGGTACCTTGGCATCACAGTCGGTGAACGGTTGAATTTTCAGCCGCATATCGCA  
GGATTGCGGGATAAACTGACTGGAGTCGTCGGAGCATTAGGCCGCGTGCTACGGGTTGACTGGGGCCTCA  
GTCCCCGAGCCAGACGCACTGTATATGCCGGACTCATGGTGCCTTGCGCACTGTTTGGTGCCTCGGTATGG  
TATTCGCGGTCAGGGGAGAGTCGGGGGCCAGGAGGCGCCTCATCTCCTGCCAAAGAGTCATGCTCTTAG  
GATGCCTACCGGTATGCCGTACAGTGTCCACCGTGGCACTGCAGGTGCTTGCTGGAGCTCCGCCGTTGGAT  
TTGGTTGCCAAGCAATTGGCAATCAGATTCAAGGTCAAGCGTGCCACCCGCTGGAGGATAGTGAAGTGGC  
TGTTCCGGTCTAGATGTGGCAAATCTAGACCAGAGGCGGATGAAGGCGTTGCTGGACGAAGGCATGTGCTC  
CGAGTGGCAACGGAGATGGGATAGTGATGAGCACGGTCGACCGACTCATCAGTTTATCCCGGACGCATGC  
TTCGTCTACAGCCGCGAGACTTTGGATTCCGGTCTTCACGCTGGATTCTTGCTGACGGGCCACGGGTGCT  
AAATGCATTTCTGCATCAGAGAAGTCTGAGTGCAACGCCCGCATGTCAATGCGGTGCGGAGCATGAAGAC  
TGGCAGCACGTGCTAGTTGCTTGCCCACTCTATGCAGATCTGCGAGACCTCGACGGACTTGGTGTGAGGA  
GAGAAGGTACCCGTTGGGACTTTTCCCGGGTCTTGGAGACACCAGAGCGGCTGCTACTCCTGGAGATGTT  
TGCGCGAGCGGTGTTTGCTAGACGGCGGCGAGGGATGGAGTGAAGTGCAACCACACAGGGCCGACCAGT  
GCCGGGCTGACGTTAGCCAAAAGTGGGAGTGGCATGGACCGTGTACGGAGCCGAACAGAGCTTAATCTG  
GTAGACAAACCCCAATTTGGGGTAAGTCGAACAATGGATGACCCATTCCGTGTTTGTGCTCAACAAAAGT  
GGGGAGTGGCAATTGCTACGAACAGCCGACCAAGCTGTAATTTGGTACCACGGGTAAACCAGGAGCCCA  
CGAACTCGTTCCGTCTTGGTTGGTTGGTGCGGCCCTTCGGGGAGTATCGTGGTGGCTGTGGTTTCGATACC  
CAATTGTGGGGAGAGTTTTTCACTCGGCGTGGAGTTGCGTGTCAACCGGGTGCTGTACCCATAGACCAGCG  
GAGGTATAGATAGACCTCACCTCCCACCAAGGGGAATGTCATGTTGACAAGCATGCATTCAATTTGGTA  
CCGAAGGGGCACTGCACATGCAGTGTCTTGGAGGGGCGCTAGTCCGACGCTTTGTTTCGGCTCGCTGTATT  
TCGAATACCGTGGTAGTAAACCCCTACGGGGTACACGCCACGTAAACAAATATGTTTTGTTTTGTCCCTA  
TCTACTCAGTTTCGTTCCAGACGNTCGTCGCGAGCGGACGTGTCGCGGAGTTATTTTCGTGTCGAAAACAAA  
AGATAAGGTGCAGGTGTTTCGCTTTGGCGTAAACAAAGCCATAAACTTAACGGGACAAGTTGCGGT  
>Ref\_dvir\_71  
CTCAATTTTTTTAGGAGCAAATCCCTGCTACCCGTCATCCGACGAAGAGTAGCAGGGACTGATATGAAATT  
CCTCATCGATACGGGCGCGTCGAAAAATTTTCATTTCGACCACATGAAGGATTAAAAGGCGTTTGCCCGGTT  
GACAAAAATTTACAAATTCATTCAATCCATGGCACGACAAACATCACACAAAAATGCTTTGTGTCAATGTT  
CAATACAAAAGCTACATTTTTTTATTTTACCCAGATTTGTCAACATTTGATGGCATCATAGGCCTTGACCTGT  
TAACACAGGTAGGAGCCTCACTTTGCTTAGCTTCAGGACAACCTCAAGTGGGGTACGGAAGTCGAAAAAAT  
CACCTTCCACACGTGCAAAAATGTAAATTTACAAAAAGTAGATTGTGTCAGAGGCACCCCCATTAGTTAAA  
AGTTCTTTCTTAAAAATGCTAAAGACCAGACAAAAGGCCTTTGCAGACCCAGATGAAGCGTTGCCGTATA  
ACACATCAGTCGTGGCTACCATTAGGACCACTGATGAGCAACCCAGTCTATGCCAAGCTTTACCCATATCC  
AATGGGAGCAGCTGATTTTCGTTAATAAAGAAATCAAAGATCTTCTAAAAAATGATATCATTAAAAAATCT  
GTCTCCCCCTACAATAACCCCATTTGGGTGGTGGACAAGAAGGGGACGGATGAGTTTGGGCAACAAGAAT  
ATGCGGCTGGTAATGGATTTTCGCAAACTTAACGAAAAAACCATCCCAGACAGATACCCTATGCCTAACA  
TTCCAATGATTTTGGGGAATCTTGGCAAAGCTAAATACTTTTCGACATTGGACCTAAAATCTGGCTATCAC  
CAGATCACGCTAGCAGAGCGTGACCGTGAAAAAACCAGCCTTTGCAGTTAACGGGGGGGAAGTACGAAT  
TTTGTGCGGACTTCCCTTTGGGTTGAAGAATGCGGCCAGCATCTTCCAAAGAACTGTTGACGACGTAAGTGC  
TGAGCAAATTGGCAAATCTTGCTATGTCTATGTTGACGATGTCATCGTCTTCTCAAAAGACGAAAATTCTC  
ATGTCCAACATGTAGAGTGGGTCTTAAAGAGCCTGTACGAGGCAAATATGAGAATCTCCAAGGAAAAATC  
GCGTTTTTTTTAAGAAAAGCGTAGGTTTTCTTGGTTTCGTGGTAACCAGTAATGGAGCTACAACGGACCCTG  
AAAAAGTCAAAGCGATTTCAGGAGTTCCCAAGAACCAAGAATATATTCGAGATCAGATCATTTTTTAGGACT  
GGCCAGTTACTATAGGTGTTTCATCAAAGACTTTGCCTCAATAGCAAAACCCATTTCTGATCTTCTAAAGG  
GCGAGAATGGGTCAGTAAGTAACATAGATCGCGAAACATCCCGGTAGAATTCTCTGAGCTTCAGCGTCA  
CGCATTCCAAAAGCTACGCAACATTTTGTATCAGAAAAATGTCATGCTCAGATACCCTGACTTTAAGAAGC  
CGTTTGATCTAACGACAGACGCTTCAGCTTACGGCATAGGGGCGAGTTTTTTCTCAAGAGGGTCGTTCCATC  
TCAATGATTTCCAGAACATTGAAGACAGCGAGGTAACTATGCAACAAATGAGAGAGAGTTATTGGCCAT  
CGTATGGTCACTTGCCAAGTTAAGGCACTATTTGTATGGGGTGAAAGACATTAATATCTTCACTGACCATC

AACCCTTGACCTTCGCAGTTTCGGAATCCAATCCAAATGCGAAGATTA AAAAGGTGGAAAGCGCGCATTGA  
CGAGTCTAATGCACGTATCTTCTATAAACCTGGCAAGGACAATCTGGTTGCGGATGCCTTGTCAAGACAG  
CAGCTCAACGCTGTAAATGAACAAGAAGTTGAGTCCTGCGCAGCAACGATCCACAGTGAGGTATCTCTCA  
CCAACACCATTGAGACAACAGACAAACCCTTGAATTGTTTTCAA AACCAAATAGTGCTAGAAGAGGGCGCG  
TTTCCCCTTAAAACGAAGTTTTATTCTTTTTTGGAATAAGAAACGCTACTTGATCAGCTATACTTGCATCG  
AATCGCTGCTAGACGAGCTCGAAGATGTAGTTTACCCCAAATGCGTAAATGCTCTCCACTGTAATTTACAC  
ACGCTTGCAATGATACAAGATGCATTGGTTCGAAGATACCCGGCCACAAAATTCTGGCACTGCAAAAATC  
GCGTAGTGACGTATTTGCGGTTGGAGAAAGAAGGGAAATCCTCACAGCCGAGCATAATAGGGCCCATAG  
GGTCTGCACAGGAAAATATTAAGCAGGTACTCTCGGAGTACTACTTTCCAAAGATGGCAAAAATAGCCAA  
TGAAATAGTACAAAATTGCAAAACATGTGCTAGGGCTAAATATGATAGACACCCCAAAAAACAAGAGCT  
TGGGGAGACACCGATCCCCTCACATGTAGGAGAGATGTTACACATAGACATTTTCTCCACTGACAGGAAA  
TACTTTCTCACTTGATCGACAAGTTCTCTAAGTTTGCTATTGTCCAACCGGTCCCTTCAAGAACCATTGTG  
GATCTGAAGCCAGCTTTAATGCAACTAATGAATTTTTTTCCAAAAGCCAGATCCATTTACTGTGACAATGA  
ACCGTCATTGAATTCAGAGACCATCGTGACTTTGCTCGCAACAACACTATGGGGTCAGCATTTCAAATGCAC  
CACCATTGCATAGCATCTCGAATGGACAGGTTGAGCGCTTTTACAGCACTCTGTTAGAACTAGCCAGATG  
CCTAAAGATCGATAAAGGCATAAGTGACACCGTAGAAGTCATTTTACTGGCTACAACCTGAATACAATAAG  
TCGATCCATTCGGTCATCGACCAGAGACCAGTCGATGTGGTTCAGGGCGACCCAGATGAGCCACAAGAAA  
AGATACAAAACAGGATCAGAGACGCTCAGACGGCGCTCAGAGCTAGGGAGAACGCCAAACGGCAGAATA  
GGGTCTTCGACGTTGGTGACAAAGTTTTGGTCAAGTCCAACCGAAGGCTCGGGAACAACTCACACCTTT  
ATGTGATGAGAAGGCCGTTGAAGCAGACCTGGGGACCGAGGTCTCATTAAAGGGAGGGTGGTCCACAA  
GGACAACCTTGAGGTAATCACCACGAGAATAAGGCCCTTGAAGTTTTTTCTTATAATACCAATCTGTTTAGC  
CGTTGGCTCGTTCTTCCAATTAATTATAAGACTTAGATATTAGCGTGTGCCCTCAGTTTAAGGTTCTGGT  
GGTGGTGGGTAAAGCAATATTA AAAACACAAAAATAGCTAAAATTCCCATTCACAGGTTTGA ACTAATTC  
TCATCTTGTCCCTGTCCCTGGCTTCGGCGCGCGTCACCGATTATTCAAACGCAAGGTACATCCCGATAGTG  
GATGGACGAATCCTGGTGTGGGAGGATTTTCGCCTACATTAAACATCGGCGAATCTTTCAGAATATGCACG  
TGTGGTGGAGGAAACGGTCAGTTTGCTTGACATGTTCCCAACAATCTCACATGAAGAAGTTCCTAAAGGTG  
GACACAGCTCACCTGCAGGACCTGCTGGAAGCGTTGGGCGTACACCATAGGGTGGCTAGAAGTTTGGATC  
TCTAGGGTCCATGCTGAAAGTAGTAGCAGGCACTACGGATGCCAACGATTTAGAAAGAATAAGATTTAC  
AGAACAACA ACTAATACATGAAAACAATAGACAAATAGAGATTAATTCAAAAGTACAAGACCAAGTTAA  
TAAGCTTACAATTACTGTCAATCAAATTCTCAAGGCCGCGAAAAACACACAAGTAAACACTGAACACTTG  
TATGAAACGCTATTGGCTAGAAATAGGATGCTGATGATAAAATTGCAAAATTTAATGCTTGCAATATCATT  
AGCAAAAGCAAACATTGTAAGCCCGAACATTTTAGACCATATCGACTTGAAATCAGTTTGGCTTGAGGAG  
CCCACCGACACCCCATAGCAGAACTTTTGTCCGTTTCGTCCGTTAAGATACTACAATCAAACAACACCTT  
ATACTTCATTATTAGGTTCCCAAAAGTTAAGCTAGCTTGTAAGAAAATCACAATTTATCCCGTCATT CAGA  
AAGGCGTAATACTGCGAATAACAGACAACACTGTGGCAGAGTGTGATGGAAACGTTACGCTCTCGAAA  
ACTGCACCGCATCCCCTGGAGCGACGTTCTGCAGACTCTCAAAGGAAAGCTCATGCGCCAGAGAGCTACA  
CGCCGGGGGGGTGGCTAACTGCGAAACCCAGCCTAGCAACCTGGAGCCAATTACTCAGGTGGACGAAGG  
GATGCTAATTATCAACGACAAGCTAGCAGAAGTGCAAGTTGATAACGGCCCTAAGACCTGGCTCCAAGGC  
ACACACCTCATTACGTTTCGCTGATCGGGCTAACGTAAATGGAACCTTTTTCATAAACCATAATAACATCTT  
GGATAGAATCCCAGGAACGGCGAACTCTCCACTGCTGAACATTACGGCTAGCCGAGATATACTAAGTCTT  
CCATATCTCCATCTATTGAACGAACGTAATGTGGAGGCAATTCAACAGTTCAGGGAGCAAATCAATGAGG  
ACCGGGCCTACCGAGTTTCGTGCATAGCAGGAGCTATCTGTTGCGCAACCGTTTTTATCGGGTTGACACTT  
TGCGGAATCACCAAGAAGAGGAAGACTGCAAGGCGGCTGAGAGAGGTGATTGCCGGCATAGGGTCGACC  
GAGGACGGTCATAAACTCGAGGGGGGAATAGTTAACACTTAAGATTGCACCAAATAACGTTGTAGAACT  
TGCACAATACTTATATTGACCCATTTACAACCAAGCACATTCCGCTGACACATGAGTTCAGCGGCCTGACC  
GCAACGGTCAGCAGCGGTAACCTGACACTTGACTATGCTGCAAGTATCCGCGTTGTGCTTATGCTGAGTC  
GGCTTGCCGACTGTAGCTTTGTAGTTTATAGATCCAAGTTTTAGGTATAATTCCAATTCAATTTTATACCAC  
AATTCAGTTTTGTATTTGACGTTTAAGAATAAACTTGCACTACTCCGGCACACTGCCGTAAATATCATTG  
TTATATATTACAAAACATTGCTGAGCCACAAGGCCAGTAATTAGCAAAGAGAGTGAAGTCAA ACTCTCC  
ACCATAATCGTCCTAAATATCACTGGAGTAGGCATCGCTGGACGAGCAACGGATCAACTATTGCATCGCT  
GGACCAGCATATGTTAATATTCTTTAGTAGTTGTTTTAGAATCATGTAAGTGGGCTTTTCGTTAACTCTTTT  
CAAGTCCATTCAAAGAAATTTAAAAAAGCACCTTATATTTGCATTACCTATTACTCGATTAT  
AAATCTATAAAAGAAAAATAATAATAATTTTACGGGCTTGAGAAGCTTTGATTGATAGATAAGCTG  
CATTTTTGGTCACTTTTATTTAAGCAAA



>Ref\_Nausicaa  
TTAACCTGTGTAATAGGATAAGAGCATCATTGGTAACCCTAGCCAGGGTATTATAGTGTCACTATCTATGT  
TAATTATAACAGTACGATAAGTAAATATCGATAAAGAAAAGCGGCTGCAGAGAAGAAAGTGGAAGGCAGT  
CTCGCTACAGTACTAGCAGTAAGAAGACGTGTTGTTAAAAATAAAAAGGCAACCCGAACATAAGTTAAAT  
CAACGAAGAAAATCATACTATTACAATATCAGAAAGTGGGATTGACTCAGAAAAAAAAAAAAAAAAACACA  
ACAAAATGGAAAATATAAATATAAATGACGTGTCAATAGCGACATTGAAAAGTTGGTTGGCATTACTAAA  
TTTGCCAACAGAGGGTACCAAAACTGAGCTGATGGCGAGATTAAATAAAGGTACCAGTGGATATCCGAGAC  
GATGCTGCAAAGGAACTTGAAGTTCAACGTAACAAGGAACAGACAATTGAGGCTCAAATGAGTTGCAA  
AACATAATGCAACAACAGCGTGACGAAATAGCAAATGGCGCCGAGATGCTGAAATTGATGCGTCTCGAA  
ATTGAAGCGTCTCGAAAATTCCTAGAAGAATTTCAAGTAACGGTGAACCGCAACTCGCACATCGGCGGGA  
GCGACGGGGGAGAGCAAGAAAGTGAAGTCGGCGATTTATTGCAGCTAGAGGATGGTCACACTGAAGAAA  
GACCACGGTTCGACGGATGGCAACGCTGGTGCAGCTGATTACACTGGAACGGATGGCAACGCTGGTGCAG  
CTGATCACGCTGATGCAGCGGGCAACGCTGGGGCAGCTGGAAGGATCGACGAAAGTGGCAACGCTGTCTG  
GAGGCAACTTAAATAATTGCATCCAACTGGAGCGATGATGTTAGCCAAGGAAATTTTATTAGAATTTAC  
TGGAGAAAGTGAGGTGCGTAAATGGGTAATGCAATTCTTCAATGTGGCCAAGATCTACAGACTAAATGAT  
ATGCAACAGCACTTGCTTTGTATAAGCAAATTGAAAGGCGGTGCTTTGAAGTGGTTGCATGCAGACCCTA  
TGCGCATCATTGCTCCGATTGACGAGATGCTAAATCAATTGGTTTTTGGCCTTCGGGGGAGGATTTTCGAAG  
TCGGAACACTACGACAGAAGTTCGAGGATCGGGTTTTGGAACCAGATGAGGTGTTCCGCCACATATTTTAGCG  
AAAAAAGCATATTGGCACAGGACATCAACATTGATGTAGAGGAGTTAATGGAGGGTATTATTCGAGGCAT  
ACCTTGCGAAAACCTTGCGCACTCAAGCTAGTATGCATTGCTTTACCAATCCGGCTCAAATTTTACGTGCGT  
TTGCAGCTATAAAGTTGCCAATTAACGGGTACGAAACCATGTAGTGAAACAACTGCACAGGAAGCAC  
AGGCGGACAAACAACACGTTGCTACAATTGCAATGTTAAGGGCCATTGGGCCAAAGATTGTTTAAAGCC  
CAAACGGGAGGCAGGATCTTGCTATGCGTGC GGCTCAAAGGATCATTTAATAGCAGGATGTCCAAATAAA  
AAGTATGATATGGAAAACAAATATGTAAGATACTTAAGAATTCATTTTAGTAACCTCATTTAACAAATCAA  
TAATTGCAGAATGCCTTATAGACTCTGGCAGCCCTATTTCAATTTTAAAGGAAAAGTTTGTGCCATTAAAA  
GTAAAGCGTATGCCAGATGCAAATTCGTATGTAGGTTTTAAATGAAAGTAAATTGAAAAATTTTGGAAAAA  
TTTTATGTTTTATGAAGAAAAAGTTAATAAATGTTTATTTTAAATGTTATAATTGTGGCAAATGAGTCTATG  
AGGTATGACGCTGTGCTTGGTAGAGATTTTATGGATTCTTTTGGTTTTAAATATTGATTTAAGAACATTAAA  
AATTGTGAACGGGCATAAAGTTGATCACCAGAATAATGGTAAAAATGATATCATAGCTACAAGCTACAAA  
GAAAAACAAAAAAAAGTGGACGATGAAGATATCAAACACGAGCAAAATGAACTATATTGTTAAATGAT  
AAAATCGTTAATAAGGAAATAGTCAGTAATGAACTGTTAGTGATGAATTAGTTAGTGAGAAAATTGTTA  
GTCCGGAAACGCTTGGTGATAAAGTTGGTAGTGATGAGATAGTTAGAAAATAAAATAATTAGTGGTGAAAT  
AGTTAGAAATGAAGTGATTGGGATCGAACTGTTAGTGATGAGATAGTTAGTTATGGAGAGCTTAAGCTC  
GAACCTGATAGTGAAGAAGTTGTTAGTGATGAAATTATCTATAATCAAACCGGGATTGAAAAAGTGATTA  
TAGAAGATATAGGAAACAGTGCAGTTAAAATTAATAATCATGTTAATGAAGCGCCAGTGAATAGCGAAAT  
CATGGGAGTGTTAGAAGAGAATTTTGAGAAGGATATCTTAACAATAAGTTGGGAAGATTCTAACAAAAGA  
GAAAATATATATATTTTAAAGTGAAGATATTGATTACAGCACAAAGTGTGAATTTGAAAATTTATTTGAAA  
ATACTTATGTAAAAGCGAAAAGGCCAAATCAGCCAAAATTAAGACATGAGTTAAGCATAAGATTAGAAA  
ACGACAAAGTATTTAATTGTACACCTAGGCGGTTATCTTATATGGAAAAAGAAAAGTTGCAAGAATTATT  
AGACGACTATTTAAAAGATGGAATCATTAGGCCAAGTTGTTTCAGAGTATGCATCACCTATAGTACTAGTG  
AAGAAAAAACTGGAGACATGAGGTTATGTATTGATTTTAGAAGACTGAACAAAATTATATGTAGAGACA  
ACTACCCGCTACCATTGATCGACGATTTATTAGACAGACTATGCGGAAAAACAGTATTTTCAAAGTTGGAT  
CTAAAAAACGGGTATTTTCATGTTTTTGTAAATGAGCAATCTATTAAATACACTTCATTTGTTACCCCTCTA  
GGACAATATGAATTTCTTAGGATGCCCATGGGTTTAAAACTGCGCCACATGTATTTCAAAGATTTGTAA  
TAACATATTTTGTGATATGATAAAAGATAATAAGGTAATTGTTTACATGGATGATATTATGATAGCAAGTA  
CAAACATAAAGGAACACATGGAGACCTTAAAGGAAGTGTTTATAAGACTGGTGCAAAACAAATTAGAGT  
TGAAATTAGATAAGTGTGAATTTTTTAAAAGCAGCGTTAAATATTTAGGATTTGTGGTGGATAGTAAAGG  
CGTTAGGGCTGATGAAAAAGGGTTAGAAGCGGTAAATCCTTTCCAATACCAAACAAAATTCAGGGAGTA  
CAAAGTTTCCTAGGGTTATGCTCCTACTTCAGGAGGTTCAATTTTAAACTTTTCTATATTAGCTAAACCCTTA  
TATGATTTATTGAAAAAAGATAAGAAATTCAAGTTTGGAGAAGAGGAGTTTAAAGTGTTTTAATATGTTAA  
AAGATAAATTGTTAGAGGCGCCAGTACTATCAATATATAATTACAAAGAAGAAATAGAACTACATTGTGA  
TGCCAGCGCAGTGGGATTTGGGGCTGTTTTATTTCAAAAAAAGAAGATAGGAAATTACACCCGATTTTTT  
ATTTTTCTAAAAGAACAACCGAAGTAGAGTCTAAATATCATAGTTTTTGAGTTAGAAACGCTAGCCATCATT  
TACGCATTACGCAGATTTTCGTATATATCTGCAGGGAAAACGATTTAAAATAATGACAGATTGCAACTCTTT

AACTTTAACGCTTAACAAAATAGATTTAAATCCGAGAATTGCTAGATGGGCGTTAGAACTACAAAATTAC  
GATTTTGTAGTTAGTGCATAGATCGGGCAAGCAAATGCAACATGTGGATGCGTTAAGCAGATGTTATGAGG  
ACATTTTAGTTATTGAATCCAATAGTTTTGAGGACAATTTAGTTATTTGCCAAAGCAAAGATGACAACTG  
GTAGATATTAGAAAAGATGTTAGAAAAAGAAGAGCACAAAGCTATTCGAAATGAGAAATGGGGTCATTTAC  
AGAAAAACAAATGATGGCAGATTAGTTTTTTTATGTACCAAAGGATATGGAAGAACATGTACTTTACAAAT  
ATCATGATGAGTTGGGACATGCTGGGAGAGATAAGATGATCGATGCCATTGGAAAGAGTTACTGGTTCCC  
ATATATTAAGGAAAAAGCAATAAAGCATATAGGGAATTGTTTAAAATGCATTGCCTTCGCCCCCAAGACG  
GGTAAGAGTGAAGGACTATTACATAGCATACCGAAAGGAAACAAACCGTGGGAGATGATCCATATAGAC  
CATTATGGACCAATTAATGCAGGAAGGGCTAATAAATATATATTGGGCGGTGGTTGACGGATTTTCAAAA  
TTTGTTAGACTATATACAGCAAAGACAACAAGTACGAAAGAAGCGATTAAGGCATTAAAAGATTATTTCA  
GAGCGTATAGTAGACCTAAGTTCATTGTATCGGACAGAGGGAGTTGTTTTACTGCAAAAAGAGTTTGATGA  
ATTTTTAAAAAATGAGGGAGTAACGCATATTAATAAGCAACGGGTGTCCGCAAGCAAATGGTCAGGTG  
GAAAGGTTGAATAGAGACTTGGGTCCGATGATGGCAAAAATGGCGGAGCCTGAAAATGGTTTACATTGG  
GATGTTATTATAGAAAATGTTGAATATGCAATAAACAACACACAACACAAAAGCATAAAGAAATTTCCAA  
GCGAAATGTTATTCGGATTACAACAGAAAGGAAAAAGTTGTTGATGAATTAAGAAAAAATTAGAAGAGT  
TTACACAGGTGAACACGTGTGATAAAAGAAATTTAGAAAATATAAGAAAGAGTGGAGAAATATATCAAA  
AAGAAGCTCAAATCAGAAATGAAGAGCGGATTAATAAAAAGAAGAAAGTATCAGTAGAATATAAAATAG  
GTGACTATGTCATGGTAAAAAATTTTGATAGCACACCAGGAGTTTCAAAAAAGTTAATACCAAGATATAA  
AGGGCCTTATAGTATAGAAAAGATTTTAAAAAATGATAGATACTTGTTAAAGGATGTAGAAGGCTTTCAA  
TTATCTCGCAACCCGTACGTTGGTATCTGGAATAGCCAAAACCTTTAAGCATTGGATGCGAAAATAGGCAA  
TAAGCATTAGTTATAAAGATAGATACACATATAAAAGACAGAGATCGGGAGCTCTCTTTGTCAGGATGGC  
CGAGTTGTAATAGGATAAGAGCATCATTGGTAACCCTAGCCAGGGTATTATAGTGTCACTATCTATGTTAA  
TTATAACAGTACGATAAGTAAATATCGATAAAGAAAAGCGGCTGCAGAGAAGAAGTGGAAGGCAGTCTC  
GCTACAGTACTAGCAGTAAGAAGACGTGTTGTTAAAAATAAAAAGGCAACCCGAACATAAGTTAAATCA  
ACGAAGAAAATCATACTATTACAC  
>160\_rnd-6\_family-566\_\_LINE\_\_I-Jockey  
CACTTACGTTTGTGTTTCTCTGGAGATCGGACGTGAAAATTGCAGTCTCGTGTGTGTGTGCGCGTTAGTGC  
ACCGCTGGCAGCAGGCATAAACCAAGAAAGTGACAGTGACACTGTATAAAGCCCCGCCCCAGGGCAATCC  
ATACAAATCCCCTTATAGTGGGTAACTATACGCAACTGCTGCCTCTGGCAGCCGGAGTGTTATACAAA  
TTAACAATATTTTAACAAAAAAAATTACCGCGTGCAGTGCCTGAGAACAAAGTTCTTGCAAACTTAAGCT  
GCGCTCAGCTGATCGCAACTCAAGTGCCTGTGTGTGTGCGCGAGTGCAGCAAAGCTTTCGCGAGAGAGCT  
TTCAGCTTGCAGCTGCACTGATAGTGTGCTGGCAAAACAGTCACTGCAGTGACAGTGCTGACACTAAAGTCA  
CAATTTGTGATCAATCACTTGTTACAAAAATACGGGTTATTTTTGTAATTAAGTGTAAAAAACTTGTTTTGT  
TTTTATTTTTTATTCTTTTTTCTCCCTGTGGGGAAAAAATTATAACAAAGTAAAGAACAATGGCTACAAAC  
AACCGACCCCAAAACAACGAAGAAATTCATTTCGCCAATCTACCCGCTGCCGAACAGCTCAATAATATCCC  
CTACAAATATAGCCGCTAATGTTCGATCGCCTCGACGGAAGCAGGCCACTGGAAGATTTTACCAATATTA  
CAACAACGTGCTCGCCAGTAGTGCAAACCGGAACGGCGCCTCCACCTCGCTGTCAGCCGGTACCCAGCAA  
TGCTCGACTTGGCAACCGCAACAGCACGGCACTGTCAGCACAAACGACAGCAACAACCAACCAACCA  
GCGTCATCCAGCAGCGGCTGCAGGACATCTGCCTCAACAGGCACAAGCCGCAGCACGGCACTGTCAGCAC  
AACGACAGCAACAACCAACCAACACAGCGTCATCCAGCAGCGGCTGCAGGACATCTGCCTCAACAGG  
CACAAGCCGCGCCGCTTTAGAGCCCATCGGGACCCGCCCAAGCCGCCAATCCGACCTTGCAGTCCACC  
CCTTATGGCACCCAGGCAGCTGGTTCTTGTTGTCACAAACCCCCCTCTGCCTCCCATAAAGAACGCAGGTGC  
TACGCCAGCCTTCGAAGAGCCACTGGTAGATTGGCAAACGGTTTCCGCAAAAAAACGGCGTGGGACTACA  
TTATTATCCGAAGGCGTAAAAAAGGGAAAGCAACTAAATAACCGCAACACCAGCCGCGCTGGAGCTAAG  
CCCGCAACTCCCAGTACCGCTTCGGCAATTAGCAACAGATATGCCTCCCTTGAGCCTCAGGAAGACGCCT  
CTGTAATCGATGACGGCGAGATGGACACTGCCGACGAAGCGCCTCCAGTCACAGACCAACAACAATCAG  
CGAAAAAGATCTCCAAACCCAGGCCGATAACAGTCCCTGGAGTCAGCGATATTGTGCGCAATGGAGCGAAC  
CATAGATCAGGCAGTGGGCGCAGACGCCTATGAATTCAAGGTCTCTCCCTCTGGCTATCTAAGAATTTACG  
CCAAAGATGCCGACACCCACAGAGCAATTGTCCGCAAGCTCACTGAAGTGAGAGTGCAATTTACCCACTT  
CTGCCTAAAGGAAGACAGACCATAACCGCGTTGTGGTTAAAAATCTGGCCGCTTCCACTCCCAGAAGCCAG  
ATTGAAGCTGCCTTTACATCGCACGGCCATATTGTGACGAACCTTTACAACCCGGGCGCCAGACAGCCAA  
CAAGTGATGCAGACTCCACCAACGACTTTCCAAGTCGCAACTTCTGGTTTGTGATCTCAAGCAGTCTCTT  
AACAAACAGGGAAGCGCTGCGGCTCAACAAGGTTGGCCGCCAACGGGTCACTATTGAGCTTCCGAGGAAG  
AACAAATAGTATAAGGCAGTGTTTCCGCTGCTTCGAGTTCGACCACACCAAAAACTACTGTCTCAAACAGC

CCAAGTGTGGTAGGTGCGGTGAGTCCCATTTGGACAAACTCCGAGCAGTGCCAGGCCAAAACAGTGGCAG  
ACCTGCGATGCTCCAAGTGGAGGGAAACCATGCTGCTTCCTATAAAGGATGCAAAAGCTATCAGGTGAG  
ACTAAATGCCAGGCAGCCGGCCATCAATGTCTCCCCTCCTACACGATATAGCCATCCTCAAAATACACGA  
AGAACCCTCAGCAGTTCGTACCTTCCCGAATTGTGCAACAGGGCCTGTCGTATGCTGATGCGCTACGGCC  
AGGCCATCATGTACAAGTCCGCCAACCCCAAGCGCGCACTCTTCAGCCCACCGTCAATCCAATGCAGCTC  
CAACAACCCTGCAAGGGCCTCAGGAGCAAGACGCTTCCCTTGGAGGCATCCTTCAAAACCTCCAGCAGT  
CCATTGCAGCACTGAATGCCGAGTTGCAACCATTCTGGTTAGCATTAAAGAGCTAAAGGATGCGCAAGG  
TTCCCCGAGCTTAGATTCCCAAAAAGCCGCAAATAATGGCTACCCAGTTACGTCTCGGATCGTGGAACG  
CTCGTGGCATCCTCCAAAATGCTAACGAGCTCAAGCTTTTTTCTGAAAAAGCATGATGTAGACATCATGCTC  
ATCTCAGAAACACATCTGCACACAACTTGTACCTAACAATGGAGGGGTACGTCTGCTACCGTGCGGATC  
ACCCTACAGGACGAGCCAGAGGTGGTGCTGTAGTGCTGGCAAAGCAGGATTTAGCACACTACCATCTACA  
CACAGTGACCTCCAGCGACACACAGCTGGCTGCTATCATGGTGGAGACTCCCTTGGGCGAAATCCTCGTT  
GCGGCAGCATACCTACCACCAAACATCCCCTGGAACCGAGCGGAATTTGATTCCCTGTTTGGCCAGCTTG  
GCCCCAAATTCATCGTTGGAGGCGACTTCAACGCTAAGCACAGACTGTGGGGAAACTACAGAGCTGACAG  
CAGAGGCACTGCGCTCCATGAGGCGCTCACTCCCTGCTCAGCCCAGGTACTGGCCACCGGTAGACCTACC  
CACTTTCCGTACAACCGGCAAAGTACGCCTTCCTGTATCGACTTTTTTATATTCAAGGGCATCCCCAACAG  
CGTACTATCGGTTTCGCGAAGAGTATGATCTATCTTCCGACCATCTGCCACTCCTCACAACGATCAACACGG  
CTGCACAAAGGATCCCCAAAAAAGCGCAGGCTTGTCTCCCTGGGTGCAACATCCAACGATTTAAGGCCGA  
ACTAAATAGCTTGATCAACCTAAACACGCAGATTCTGTAGTTGAGGACGTCGACGCTGCAGTACAAACC  
CTGTTGGACCAAGTACATGCCGAGCCGCCAACGCTGCGCCCGCACATATCTACTCAGCCCCTACAAGCC  
AGCGGCCAAGGACGTTTTCCCCCATATTGGAAGGTCTTCTCGCCCTAAAAAAGCGACTGAGGAGGGAGTA  
TGTCGGTACCCAGGACCCACGATTGACAGGATCTATCGTCGTATTGCTAACAGGGTCAGGAAGGAGCTG  
ATTATCTCGAAAAGAAATGCCACAGACACCATGCTGGAGGAAGCAACGGCAGACGAGAGCTCCAAATTC  
GCGCTGTGGAAACTTAGCAGTCGATACAAGCGGCAAGCTGCGCCAAAGTTCCCCGTTGCGACTTCCCGATG  
ACACCTGGGCCAGATACCAATGGACAGAGCCGAAGCCTTTGCCTGCAACTTGGAGGAGCGCTTCAAGCC  
GTTTGAGACCGCATCGCATGGAAGGATACAGCGAGTCGCGCAAATCCTGGAGGCGCCACTCCAAATGTCA  
CTCCCTGTATCGCCAATCACCTTCCAAGAAGTAGAGCAGGAGATGAAGAGATTAAAAAGCAGCAAAGCC  
CCTGGGGAAGATCGGTTGGACAACAGACAATCAAGCTACTGCCATACAAGGCGGTGCTTTTTCTCGTCG  
CCATTTTTAATGCAGCTCTTCGGCTAGGTTACTTTCCAGTGGCTTGGGAAGAAGGCACATATAATCATGTTG  
CACAAGAGCGGAAAGCCCCCTAATCAACTGGGATCCTATCGCCCCATCAGCCTCCTGCCTGCCTTTGGTAA  
GATTCTGGAAAGGTGCATCCTCAGAAGGGTCTTGATACCCCGGAAATAAAACGCTTGATCCCGAAGTTC  
CAGTTTGGGTTTCGACTCAAACACGGTACCCCTGAGCAACTACATCGGGTCACAAATTATATTTTGGACGG  
CTTTCACAGGAAAGAGTATGTGGTGGCAGCATACCTCGACATCCAAGAAGCCTTCGACCGGGTGTGGCAC  
GCAGGACTCCTCTCCAAGATAAAGGACAAATTGAATCCGCAGCTATTTAGCACCATTGCGAGCTTCCTAA  
CTGAGAGAACCTTTCAAGTGGTGCAGGATGGAGTAGCCTCTCAAACCAAACGCATAAAAGCGGGCGTTCC  
ACAAGGCAGCGTCTTGGGTCCCACGCTATATAGCCTGTTTACACATGACATGCCACAGCAAATGCAAGC  
AGACGGAATGATCGGCAGGACCTTCTGGTGGCCACGTTTGCTGACGACACGGCAATCCTTGCAAAAAACA  
AATGTGTGTACGTGGCAACTGACCTCTTGCAGGAATACCTCAAGCGATTTGAAAACCTGGGCTTGTAGATG  
GAACATCGCAGTGAACCCTGGAAAGTGCGCCACGGTTACCCACACTCTACGCAAGGACTCATGCCCGGA  
CTTTTTCTTCATGGTGAAGCTTCTAGAGCAATATCGTCAACACAAGTACCTAGGTGTCACTCTCGACAGACG  
ACTTACATTTAGTAAGCACGTCTCTGCAGTAACGAGCAACATCAAATCTAAGATAAGGCGAATGAGCTGG  
CTCCTCAACTCCAAAAACAACTCTCGCTCCGAAACAAGGTCTAATCTACAAGGTAATCCTTGCCCCAGT  
GTGGCGTTACGGGCTTCAAGTTTACGGTATAGCTGCAAAAACACACCTGAACAAAATTCGCATCATTTCAG  
GCCAAAACCTGCGCAAAATAACTGGAGCCGAATGGTATATTCGCACACGCGACATCGCCAAGGACCTCA  
AGGTTCCAATGGTGGGCGACGTAGTCAACAGGCAAGCAGCGAGCTACTCAACAAAGCTCCACAACCATCC  
AAACATCCTGGCGAGGAGCCTGCTAAGGAGGCGAAGAAGAAGGCGACTGAAGAGGACCTACCCAACCGA  
CCTAATCGATCGTTATGTATAGGTGACAAGCTTCGTTAATTACACCAAATATGTTTCTGTAATCTGTTAA  
CCTAATTGTATAACTAATTGTAAAACCAACATCATCGCTAAGCTAAGTAATTATGTCACTCTGATAAAAGT  
TGCTAACATAGAGTAACAGGATACCAGATTTCTTAATAAACAAAATATAAAAAAAAAAAAAAAAAAAAAA  
AAAAAAAAAAAAAAAAAAAAA  
>160\_rnd-1\_family-345\_\_LTR\_\_Gypsy  
TAAGNGAATAATAATAAAATTTTCTTTTATAAATAAAATTAANCGAACAAAAAAAAAAAAAAAAAATAAAT  
AAAAATAAAAAGTGAAAAGACACCAACACCAAGAAAAGGAGAGAGGAATAGTAAAGGGACCGACGGAA  
CCCCTAGAACGGGAAGAGAGGGAAACAGCGACGTGCGACTAGCAAGGAAGTATACAATAAAGGATATGGA

GTCAGGTGAGTGCCAAAACCCGGGGGTAGGCGTGC GTTGGATCCACCAGCGGCGCAAGGAGGAGTTGGT  
GGCCATCGCCCAGGAGTTCGGGCTAGANAAGGAAGGGCGCGTGGAGGAGCTGCGTAGGCGGCTGTCCAC  
CTACGTGCAGGAGGGCGGCCATTCGNCTGAGATCTGGGCTCGGCTTGCCGAGCTGGAGTCTCAGTTCCGC  
AAAACGTTNGAGCCGCTATCCTGGGGCGTCCCATCCGACGTGGCTGGACGGCCGCGGCCAAAAGTCAGAG  
CCTGATCNTAGGAGCTCACAATTGTACGGGCGTCCGCGGCCGCTATCCCTGGTGTGGCCGTCACGGGGC  
TGGAAGAGGGCTCCCGATCCCGGGGAAAATGGAGACCGCCGNGCAACCGCGACCAACGTAGGNGTGGGGC  
GGCCCCAACCGCCATATTCTCGGTTCGGAGGTTAGGCCTTTCNCAAACGCTCCGGAACAAGTTCGGAGGTG  
GGGCATGAGATACGATGGTTCGCTCCGACCCCCCTCGGGTTCTTGGAGGACCTAGAGGAACGCGCCATCACT  
ATGGTATGCCCTCGATAGATTGCCCCGGCCGATGAGCGAGGTGTTCTGCGACAGGGCCGGTTCGGTGGGCT  
NAGAGATGTGCTATGGTTCGGTGTTCAGGAGGGGTTTTTGGTTCTTCCTGCCCCCCTGCCCCACGCTACTT  
CGAAGGGCTTGAGGACGAAATCCGGTCCCGCAGGCAACGCGNNGGGGGAGGAATTCANGGAGTACCTGNT  
AGAGCTGAGAGCTCTGATGCATCACGCCAGATACGAACCGGCACAGGAGTTGCACCGGATCTACGAAAA  
CGCCGCTCCCGAATACAAACCTCTATATTGAATACAAAGTGCCAACCTCAATTAATTTGATGTAACAACCACT  
GTATTTGTATATTGACTTGTCCGTTATTTTTCGTTTTCGGCATCTCTTTATTCTCGGTTGTTTCCTAAATTTT  
AAATGCACCATGAGAAATTCTTAACCGATTACACACAGCCAATGAAAAATGTATTAAATGTTTATGTGAC  
AATTAAGAGAGTTGTATTTCATTATTATATAATAAAGAAGTTATTCTGTGTTGTACCCAAAAA  
CATCATAATGAAATATGTACATCGATACTTTATTTGTCAGTAGTAATCAAATTTTCATTGGCACGTGCCAA  
AAGTGTGCTGCCTTGCACTGATCTTCGTTATTGCTTGATCTCATTGTTTCCTTTGCTCAAACCTGTGCGGG  
GGTTAACGAAACAAAAAATGTGAATTACTCAAATATTGAATTTGAATTAATAATAGGGAAGTCGTGCAGG  
CTGTAGTTGTTCACTCTCAATGAGCAACAAATTTATATTAGAAGTAGGGTATTAAAGCTAGGTGACACGA  
CTTACTTATGCCGTGTCCGATAAAATCAGTGGCCTTAGCGNCACGCCGAAGATCTGATAGCCTTGCCGACC  
CAACCTTGTGATAATGCTTATAGTGCTTTGCCCGTATCTTAGAAGCAGAGGAAAATAGATAATGCCGAGTT  
TGGTCAAGATATCTTGATAAACAAGAAAGGTTTTTAATCAAAAACTTGTTTTCAACCCATCGTTCCTATG  
CCAGATATATGATATAGTAGTCCGATCTAAATCGGATTTTGCATTTATATGAGGAGTACAATAAACTAAT  
AAATGTGAGATTGGTTAAGATATCTTGATAAACAATAATGTTTTTCATACAACAACCTAATTTTCGACCG  
ATCGTTTGTAAAGGCAGGTATATGATATAGTGGTGCGATCTTAATAGGATTTTGCATATATATGAGGAGTAT  
AGTAAACTAATAAATGCCGAGATTGGTCAAGGTATCTTAAAAACAATAATGTTTTTCATACAACAATTT  
AATTTTATATATAGTGGTGGGATATAGTGGTACGATCCAGCTTTTTTTGACATATGTTCTGCGTGCAACAG  
AAAGAGGGACTTCTGCAAAGTTTCATTTAGATAGCTTTAAATTTGAGAGACTAGTTTCGCATAGAAACAGA  
CAGATGGACAGACAGACATGGCTATATCGACTCGGCTGTTGATGCTGATAAAGAATATGTATACTTTATG  
GGGTCGGAGAAGTCTCCTTCTATGCGTTACACATTTTTTCGACAAAGGATGCGTACATAATTGTGAGACATG  
TACATACCATATGTGTGTATACATACATTACAGATAATACTATACCAAAGAAAACTAAACACTAAGATG  
AGTAACGCCAATTGCATGCAACGCAAAATTTATAGCCTGACTTTCTAAACTGGCTTTTACGATTTTCGCACG  
ACATGGATGCCAAAGTCGCGGCTCTCTGATTCTGACACGAGCAGAGAAATTAGTTGCCTACCTGCCTTCA  
GCAAAGCTGGTCGATGGTGATTTGCATGGCCTCGTTTTTCGAAGTACATTGAGCGAAAAAGTTTTGAACCTA  
CAATCGACGCAAAGCACTTTTGATTTATCCATGAAACGCATGCTTTATTAATAATGATATAATACCCTAGAT  
ACTAACGATAACTTTTACAAGAAAATTTGTGAGGACGCCACTAGGATAGCTACCCACAGTTCATAATTG  
TAATTATAGGGTATAAGCATTGTATAGTATATACAGTATGTCAAGAATGAGTTTACACATTGAATAAAAA  
TATATTTTTTTCATCTATTGGACTAAAAATATGAACACCCGCCTGACATTTTAACTTGCTTTTGGGAATTTA  
TAGGAAGTGATGATATTTTTAATGAAACAGTAGCATCAAAATGAAATGTTAACAATAAGAAACCAAAAA  
AAAAAAAACACAAATACAAAAATGACTCAGTTTGACCAAGACAATATAAACTCTAAGATGACTAACG  
CCATACAACAAAATGCTACTATGCAGCTTGATTTTTTGAAAATTGAGAACGAAACGAAATCTGTAGCAT  
TGCGCTCTCACAGCCGAGAGAACGAAAAAGCTAAAAATAGAATTTGCTCTCAGCTTCGGCTCTATGAGGG  
CCGTGCAAGCAATTATGTTTGTATGCGTGTGAATATACATACATAACAGCATATTTGAATGTGTTGTTATC  
CACNGCTCTGGCAAAGTGTCTGGCTGGCAAAGAAACAATTTTCTTNGTTTTTTAGCGCAGATCACGACCTA  
CCCAAAGTTCTGTGGATATACTTATGGGTGCATTTTGTGTACTGAGGTGGCTCCGTACAAAAAATTTG  
TATATTTAAGTCTATGCAAATATTTATGTAATTTTTTACATTTGAAATTATTAATTAATTAATTAATTTT  
AAGTAATACAAAATAAATTAAGGAAATAAAAGTGCAAATTTGTTGTTTTCAAAGATACATTTAATTAATTT  
TTATTTNTTTTTATTTTATTATTTTTTGTTCGAATTATAAAGAAGTACGCAGGGAAAACCGCGAGGAGGCC  
ATTATAATTATAATAGGGTGATACTAAATATGACCTTCGAGTCGACTTGAAATGTAATTGTTTTTTTAGC  
ACTCTTTTATTTCTTAATTGGAGAATAAAAAATAATTAATTCAATTTAAAAAATTATGTAAATATTTGC  
ATCGACTTAGAAATACATATTTTCTGCGGAGCCAACCTCAGTACACAAAATGCATTCATATATCAACACA  
AATTTGGGATAGGTCATGATCTGCGCTACAAAACAAACAAAATTAATTTCTTGCCAGCTGAAGCCAGAGC  
AGTGAATAACAACACATACCTTAAAGTTCTTATGCATGTATAATTCACGCATACAACGAAAGGTGCACGC

ACGCTATTGGCTGAGACAAGAACTTTGCTCGAGCATACACTGTCCAAAAAGAAAAGTGAAATCAATCTAT  
GTGTGCTATTTTCTTAACATAGTTATTGCGCAAGAAGCGCCTTGTGTAAAAATTTTATAAATTCTTAAATTT  
TCCTGTAAAATTAATCGCTAATATCTAGGGTAATATATCATTTAAATAAAGCATGCATTTTCATGGATAAAA  
CACAAGCACTTTGCGTCGATCGTAAGTTCTAAACTTTTTTCGCTCAATGTACTTCGAAAACGAAGCGACGCA  
AAGCAGAATCCACCAGCTTTGCTGAAGGCAGGCTGGCGAATAACTTCGTAGCTCGTGTGTCAGCATCAGCAA  
GCCACGACTTCGGCATTTCGTTTCGTCTGGTCTTTGGACTACGAACAACCAGTCGGCAGGCAAGACGTACGA  
AGCCTCAAAGGCCAGATGAAAGGCCAGGCTATGTATGGGCGTTACTCATCTTAGTGTTTATATTGTCTTTG  
GTTTGACTACTGTCAAGAACTCTTTACACATTCTTTTCTTCTCCCTTTTTTCAATATTCCAAGAACAACG  
GTACATTTACCGATATCTATTCTTTGCTTTGCATTGTTTTCAATGCATTTTCATTTTCAATTCGGCGATGC  
TTTTCGATGATATCACGTGCTTTGAGAAGCTATTTGATTTTTTAAAAGATGCCAGGCAAAAGATTATAATTT  
GAAGTTGTCCAGCTTATATTCTATAACCACCAGATGGGAAAAAGTGTGCTTGAGCTATAAGCAATGTTTTTC  
TGTTACACGAAAGACTATATACAACGCTTTAAACGAATTGAAAATGAAGGTACGTTGGACCCAAAAGAG  
GAGGCGGACCTAAGCCTAAAATAGCGGAGCTTACAGAGCGTTTCATGATGAGGAAGGTGGCTCTAAATCC  
TCAGATCTTAACCAGGGCTCTTCCCAGGGAGCTGAATGATAAATTTGAATTTGCGGTTTCTTATGAAACAG  
TAAGGCAAGCAATAATTGGCAATGATTACAAGTAAAGAGCTGCGCGCAAGAAACCGCTCCTTTCTAAAAT  
AAACATTGAAAAACGATTGTGCTTCGCCTATATGCACATTTCTTATCCAATTGATTATTGGGACAATCATA  
TTTTATGATGAAACAAAAATGATGCTTTACTACAATGATGGGCCTAGTAGAGTATGGCGGATCAGCCACA  
GACATGATCAGCCACAGACATTTGTATGTGTGTGTCTGTGTGTAGAGGTGCGAAAATCAGAAATCCTAAAA  
TCTTGTTAAATTTGCATCGGGGACAGGCAGGCAGGCAAGCAACAGGCACACAAGCGCATAAATGCTTCTA  
TTCATATACAAAACATACAAGTATGCGTGAATAGCGAGTCC

>Ref\_dvir.3.94.centroid

GTATATAAATTAATATATATATATGTCGTGTATCCAATAAATTATTGTGAGTATTATTTTGAATGCTAACGA  
TTAAGTGTTAGTAAGAATCAGAGAATTTGACAGAAGGTACTGCTATTTAACATAACTGTCCTACTTGTATT  
AGGGTTGCTACTGAAAGCATGGTGTGAGACAAAAAAGATAGTCTCTGCCGAGCATGGCCCGAGTGTGTT  
GTATAACGTCCAGTTTGCTATAGTGTGTAATGTTCACTAACAGTACTAAAAGTCAGAGAAGAATATAGAA  
TGACAAGAGCATGAGTAGTATGCTCGAGGACGATGAAAATTATTCATTCTAAAAGTGGAAGTCATAGAGA  
ACAGACGTGCTCGCTCCTAAAAATATAATTATTTTGTGACTATAACGACACTCGGGACTTGCTGTACTGCC  
AGTATGCCTAATTGCAAAGAAAGTGATTTCTCTGTTCCGACATCAGAAAGTGGGATTAGGCGATGCCCTCC  
ACGAGGCAATTCTGACGATTCGTGGCGTCAGCTTTTGGAATCTCAAAATCGAAATATTCTTGAGATTATTA  
AAGCAATGCAGATGTCAAATTCAGCATCCTCAACAAAGAAGAGCATCTCGTTGCCAAAGTTCAACCCGGA  
CATTGCAGGCGCAGATGCAAATGCCTGGTGCAAACTGTGGACATAATACTTGACGATAATCCTATTGAG  
GGCAGTACACTGGTGTATGACCCTCAGCGGCTCCCTAAAAGGAAGCGCCTCGCCCTGGCTTTCTCAAATAT  
GCTATACTGGAATGAACTGGCAAAATTTTAAGGAATTGTTTTTGTGCAACGTTTCGTGGGAATGGAAACATC  
GGCGGCAACTTTAATGAACATTTTTAATGGCCGACCGAATGATGGCGAATGCCTCTCCGTATATGCGAGC  
CGTCTTGTGACCTCACTTTTATCCAAATGGAAGACAGCGAACATGGAGGAAATTGCAGTCTCAGTTGTTTT  
GGCACATACATCGAAAATCGACAAAAGTCTGCAACGTATGTTATATACGACTAATATTAAGTCAAGAC  
GAGATGCAACAGCATCTGAAGGCCTATGCTTATGGAAGGTCAAATGGAGGTCTACAGCCAAATATCCCAA  
TGGAACCAGATCGCAAGAGATCGAAAACATATGGCATTAAATGTCATCATTGTGGAAACCTCGGACACAA  
AATGGTTCGAATGTCGCAAGAGGAAGTATGAAGAAGGCAACGTGTCAAAAAACTCAGCATTACCTAAAGT  
TCGATCTGCCGTTACCTGCTTCAAATGTGGCGATGCTGGCCACATTGCGTCTTCATGTACGAAAGGAGTTT  
CTACGAGCGGTGTTGGATCACATGACAAGCGTATAAACATCTGTTGTGTGTCCGAGCCAAAAGGAATCCT  
GCGTCAATCTGGTGAGCTCGTTCCATTTTGTGTTTACTCTGGAGCGGAATGTACGCTCATCAGAGAGAGTT  
GTGCCGAGAAATTTTCCGGAAAAAGAATTAATAATTTGATAGTTTTGAGGGGTATTGGAGAAAATCCTGT  
GTATAGCACTATGCAAATCTTGGCTACTGTTAAAATTGATCAGTACTCCTTAGAAATATTATTTTCATGTAA  
TAATGGATAAGTTTTTGAATAACGATGTATTGATAGGCCGTGATATACTCGGATTAGGCTTTGGAGTCTCC  
ATCGAGGCCGACAAATTTGAAATGTACAAAACCAAACCTGTTGATGTACTAATAAAAAGTGCCAGATATA  
AGTTACGTAGAGCATCTGAATAACGATAGAGCATTAAAGCAACACTGATAAGAATCGTCTGCTAGAATTAT  
TGCAAAACTATGCTGATAAATTTATTGAGGGTATTCCTCAAACGCGAGTGACTACGGGTGAACTTGAAAT  
CCGCCTGCTTGACCCAAATAAAACTGTACAAAGGCGTCCGTATAGGTTAAGCATAGAAGAAAAAGAAAGTC  
GTGCGAAATAAAGTAAAAGAATTGTTAGACGCAACGTTATACGTCCTAGTTGCTCTCCATTTGCAAGCC  
CAATGCTGATGGTAAGAAAGAAAAATGGAACCGATCGACTATGTGTCGATTATCGGGAACTGAATGCTAA  
TACGGTCGCTGACAAATATCCGCTGCCTTTGATTTCTGATCAAATTAATAGACTGAGTGAAGGCGAATATT  
TCTCCAGTTTAGACATGGCAAGTGGTTTTTACCAAGTTCCAATACACCCAGACTCTATCGAGCGCACTGCT  
TTTGTACGCCAGAAGGACAGTATGAATTTTTGGCCATGCCTTTTGGATTAAAAAATGCTTCCTCGATTTT



TTTTTTTTTTTTTGTGTGTGTCTGTGCATCACACGTCTATAGGCTCTTGCTGCCAGCAACGATAACATGGA  
GCGGATCCATACAGGTCTTTCAACCTCTGACCCCCGCCATAATATCACCCGCTTCAGCACGCCATGATCGA  
GCACTTGTGCACGGCGTGAGTATTATGGTGCGGTCTTAGCCATCGTGTATGAGCCCAACCGCACTCTCTCT  
TAGTGCCACAGTGTCTTGAGCAATGTCCTCAACATTGTCACTCATCATCTCTCAAATCTATCAACTCCTC  
CGATACATTGTTGCTTGGAAGCTCGCAAATACTCATGTGCATACTTAAACGTGCGCTTACTCGTCAATG  
ACTTTAATAAATATCTGTCTCCATCAAGTATTTTCGATTATCTCAAAAGGTCCCTTAAACTTGGGATCTAACT  
TCGTTTGATTTCGTTCTTCCCTCTTGAGTAGGACATGATACCAAGCTTATATTTTACAATTTTGTCTTTATT  
TTTATCAAACCTAGCCTTATCATATTTAGCGTTATTCACCATGTTATCTTTTCGCTTGTGCTCTTATTAAATCT  
TTATCAATTGTTTTTTCATCTGATATTGTTATCATTCCTAACGGCCTTGCCTCTTTACCGATTAGCAATTCTA  
ACGGACTATATTTTCGTTACACGATTTGTCTGTGCAATTTATTGCCAGCTGTATGTCTTTTAAAGCGTCTTGCC  
AGGATCGCTGACTACTCTCAACCGCTGTGAGCATGCTCTTCAAGGTGCTCATGACACGCTCTACTTGGCCG  
TTTGCTCGACTGGCGCCCGTCGCAATCAGGTGTAAACCTATCTTCTGCGAAGAACAAAATTCCCTAAACCT  
TGTGCTAGCAAAACATCTACCCTGATCAGCTATGATGCGTGCCGGCACTCCGAATAGTGCAACAGTTTCTT  
TGACTGCCTTAATGCAGTTTTCCGTATTAAGGTTTCAGCGTATGTTGAAGGTGAACAAATTTTGTGAATGCA  
TCAACTTGAACATATGATGTACTCTTTTAAGTCGTTTTTGGCACTTAATTTTCCGGTTATATCAATATGCACA  
GTGTGCCAGGGTATGTCATCTTTAGGAATCGGGTGCATTTCTATTTGTGGCTTACCAGATGGTGGTTTTGA  
CACTCTACAGGTAATGCAATTTTCTACAACTTTTTCACATACTTAGACATCTTCTCGAACCAGTAGTTGG  
CATACATTTTGTCTAGAGTTTTCTTCCACCCTAAATGCATTATGGCTTCGTGAACATTGTTAATGACTGACC  
ATCTAAAGGCTCTAGGTATTACAGGCAAACATTTTGTGCTGCCATTTCTTTGAATCCTTCGATATAATACTC  
CTGCTCTCAATTCGTACGACGCTGAGATAGCTTCTCCCATCTTATGGTTTTCGCAATTTTAAAGGTTATGGAA  
GCAATGTCAGAATCTCGTTGCTGTTCCGGCTAGAAGCCAATCGTCGGTTATCTCAGCTAGGTTTATGTGCAT  
TTCAACCGTTTTTCGCTGAGGATTTATAATCAGTAGGCAACGGATTGCGCGAGAAAAAATCAGCATGTAAC  
ATGCGTTCTCCCTTCCTGTATTCAATGCTGAAATCAAATGATTGCAGATATGCCACCATCTATGTACCCTT  
GGGGTAAGGTTAATTTTTTTGATACTTGCTTTCAGGGAGTTGCAATCTGTATGCACAATAAATTTTTGACC  
ATGTAAATAATGGCGGAAGTGTCTTACTGCGTTGTAAACTGCGAGGGTCTCAAGCTCGTATGAATGATATT  
TTGCTTCAGCCATTGTCGTACATTTGCTGTAATATTCAATGACTCTGGGTCTATTTTCTATCTTGTGCATTA  
AAATAGCACCATATCCAATAGAACTTGCGTCTGTATGTAATTCAATTGGCTTTAGTGGATCGAAAATTGTC  
AAAACGGAGTCATTAGTCAAAATTGATACGATTTTTTGACGAATTTCTCATATTCCGGCTTCCAGACAAA  
TTTATTATTCTTGGAGGTGAGATTATATAAAGCTTTCATCTGCTCAGAAAAATTTTGGTACGAATTGCCTAA  
AATACGAGGCTAGGCCTATGAATTGTCGCACCTGCGTTACTGACTGCGGTGACGGCAATTCGGCCAACGC  
TTGTATCTTGCGTGGATTTGGTCGAATTTGACCCGCTTCAACCAAGTATCCTAAATATTCTATGCTTGT  
CAAGAACGAGCATTTTGTAAATGTTAAATGAGAATCCAGCTCTAGACAAGTTTTCCAAGACCGTTTGTAGCC  
TTTCAAGTGCCTCTTCTTTGTCTTCGCTAGAATTAACACGTCATCTATATAGACGATGGCATAAGTTTGAG  
CCAAATCACCCAATGCTCTCACGATTGCGCGCTGGAAAATCGAGGAAGCATTTTTTAATCCAAAAGGCAT  
GGCCAAAATTCATACTGTCCTTCTGGCGTGACAAAAGCAGTGCGCTCGATAGAGTCTGGGTGTATTGGA  
ACTTGGTAAAAACCACTTGCCATGTCTAACTGGAGAAATATTTGCCTTCACTCAGTCTATTAATTTGATC  
AGAAATCAAAGGCAGCGGATTTTGTGTCAGCGACCGTATTAGCATTCAGTTCCCGATAATCGACACATAGT  
CGATCGGTTCATTTTTCTTTCTTACCATCAGCATTGGGCTTGCAAATGGAGAGCAACTAGGACGTATAAC  
GTTTGCCTCTAACAATTCTTTTACTTTATTTTCGCACGACTTCTTTTTCTTCTATGCTTAACCTATACGGACGC  
CTTTGTACAGTTTTTATTTGGGTCAAGCAGGCGGATTTCAAGTTTACCCGTAGTCACTCGCGTTTGAGGAAT  
ACCCTCAATAAATTTATCAGCATAGTTTTGCAATAATTCTAGCAGACGATTCTTATCAGTGTTGCTTAATG  
CTCTATCGTTATTCAGATGCTCTACGTAACCTTATATCTGGCACTTTTATTAGTACATCAACAGTTTTTGGTTT  
TGTACATTTCAAATTTGTCGGCCTCGATGGAGACTCCAAAGCCTAATCCGAGTATATCACGGCCTATCAAT  
ACATCGTATTTCAAAAACCTTATCCATTATTACATGAAATAATATTTCTAAGGAGTACTGATCAATTTTAA  
AGTAGCCAAGATTTGCATAGTGCTATACACAGGATTTTCTCCAATACCCCTCAAACTATCAAATTATTAA  
TTCTTTTTCCGGAAAATTTCTCGGCACAACTCTCTCTGATGAGCGTACATTCCGCTCCAGAGTCAAAACAA  
AATGGAACGAGCTCACCAGATTGACGCAGGATTCCTTTTGGCTCGGACACACAACAGATGTTTATACGCT  
TGTCATGTGATCCAACACCGCTCGTAGAACTCCTTTTCGTACATGAAGACGCAATGTGGCCAGCATCGCC  
ACATTTGAAGCAGGTAACGGCAGATCGAACTTTAGGTAATGCTGAGTTTTTTGACACGTTGCCTTCTTCAT  
ACTTCCTCTTGCGACATTCGACCATTTTGTGTCCGAGGTTTCCACAATGATGACATTTAATGCCATATGTTT  
TCGATCTCTTGCGATCTGGTTCCATTGGGATATTTGGCTGTAGACCTCCATTTGACCTTCCATAAGCATAGG  
CCTTCAGATGCTGTTGCATCTCGTCTTGACTTTTAAATATTAGTCGTATATAACATACGTTGCAGACTTTTGT  
CGATTTTCGATGTATGTGCCAAAACAACTGAGACTGCAATTTCCCTCCATGTTGCTGTCTTCCATTTGGATA  
AAAGTGANGTCACAAGACGGCTCGCATATACGGAGAGGCATTCGCCATCATTCGGTCCGGCCATTAAAAAT

GTTTCATTAAAGTTGCCGCCGATGTTTCCATTCCCACGAAACGTTGCAAAAACAATTCCTTAAAATTTTGCC  
AGTTCATTCCAGTATAGCATATTTGAGAAAGCCAGGGCGAGGCGCTTCCTTCTAGGGAGCCGCTGAGGGT  
CATCACCAGTGTACTGCCCTCAATAGGATTATCGTCAAGTATTATGTCCACAGTTTTGCACCAGGCATTTG  
CATCTGCGCCTGCAATGTCCGGGTTGAACTTTGGCAACGAGATGCTCTTCTTTGTTGAGGATGCTGAATTT  
GACATCTGCATTGCTTTAATAATCTCAAGAATATTTTCGATTTTGAGATTCCAAAAGCTGACGCCACGAATC  
GTCAGAATTGCCTCGTGAGGGGCATCGCCTAATCCCACCTTCTGATGTCGGAACAGAGAAATCACTTTCTT  
TGCAATTAGGCATACTGGCAGCACAGCAAGTCCCGAGTGTCTGTTATAGTCACAAAATAATTATATTTTGTAG  
GAGCGAGCACGTCTGTTCTCTATGACTTCCACTTTTAGAATGAATAATTTTCATCGTCCTCGAGCATACTA  
CTCATGCTCTTGTCAATTCTATATTCTTCTCTGACTTTTAGTACTGTTAGTGAACATTCAACACTATAGCAAA  
CTGGACGTTATACAACACACTCGGGCCATGCTCGGCAGAGACTATCTTTTTTTGTCTCACACCATGCTTTC  
AGTAGCAACCCTAATACAAGTAGGACAGTTATGTTAAATAGCAGTACCTTCTGTCAAATTCTCTGATTCTT  
ACTAACACTTAATCGTTAGCATTCAAAAATAATACTCACAATAATTTATTGGATACACGACATATATATATA  
TATATATATATAT  
>Ref\_snarf  
CCTCACTTACGTTTGTGTTTCTCTGGAGATCGGACGTGAAAATTGCAGTCTCGTGTGTGTGTGCGCGTTAG  
TGCACCGCTGGCAGCAGGCATAAACCAAGAAAGTGACAGTGACACTGTATAAAGCCCGCCCCAGGGCAC  
ATCCATACAAAATCCCGCTTATAAGTGGGTAAACTATACGCAAACCTGCTGCCTCTGGCAGCCCGGAGTGT  
TATACAAATTAACAAATATTTTAACAAAAAAATTACCGCGTGCAGTGCGTGAGAACAAGTTCTTGCAAAA  
CTTAAGCTGCGCTCAGCTGATCGCAACTCAAGTGCGTGTGTGTGTGCGCGAGTGACAGCAAAGCTTTCGCG  
AGAGAGCTTTCAGCTTGACAGCTGCACTGATAGTGCTGGCAAAACAGTCACTGACAGTGACAGTGCTGACAC  
TAAAGTCACAATTTGTGATCAATCACTTGTTACAAAAATACGGGTATTTTTTGTAATTAAGTGTA AAAAAC  
TTGTTTTGTTTTTATTTTTTATTCTTTTTTCTCCCTGTGGGGAAAAAATTATAACAAAGTAAAGAACAATGG  
CTACAAACAACCGACCCCAAAACAACGAAGAAATTCATTCGCCAATCTACCCGCTGCCGAACAGCTCAAT  
TATATCCCGGTACAAATATAGCCGCTAATGTCGATCGCCTCGACGGAAGCAGGCCACTGGAAGATTTTAA  
CCAATATTACAACAACGTGCTCGCCAGTAGTGCAAACCGGAACGGCGCCTCCACCTCGCTGTCAGCCGGT  
ACCCAGCAATGCTCGACTTGGAACCGCAACAGCACGGCACTGTCAGCACAACGACAGCAACAACCACC  
ACAACCACAGCGTCATCCAGCAGCGGCTGCAGGACATCTGCCTCAACAGGCACAAGCCGCGCCGCTTTAG  
AGCCCATCGGGACCCGCCCCAAAGCCGCCAATCCGACCTTGACGTCCACCCCTTATGGCACCCAGGCAGC  
TGGTTCTTGTGTCACAAACCCCTCTGCCTCCCATAAAGAACGCAGGTGCTACGCCAGCCTTCGAAGAGC  
CACTGGTAGATTGGCAAACGGTTTCCGCAAAAAAACGGCGTGGGACTACATTATTATCCGAAGGCGTAAA  
AAAAGGGAAGCAACTAAATAACCGCAACACCAGCCGCGCTGGAGCTAAGCCCGCAACTCCCAGTACCGC  
TTCGGCAATTAGCAACAGATATGCCTCCCTTGAGCCTCAGGAAGACGCCTCTGTAATCGATGACGGCGAG  
ATGGACACTGCCGACGAAGCGCCTCCAGTCACAGACCAACAACAATCAGCGAAAAAGATCTCCAAACCC  
AGGCCGATAACAGTCCCTGGAGTCAGCGATATTGTCGCAATGGAGCGAACCATAGATCAGGCAGTGGGC  
GCAGACGCCTATGAATTCAAGGTCTCTCCCTCTGGCTATCTAAGAATTTACGCCAAAGATGCCGACACCCA  
CAGAGCAATTGTCCGCAAGCTCACTGAAGTGAGAGTGCAATTTACCCACTTCTGCCTAAAGGAAGACAGA  
CCATACCGCGTTATGGTTAAAAATCTGGCCGCTTCCACTCCCAGAAGCCAGATTGAAGCTGCCTTTACATC  
GCACGGCCATATTGTGACGAACCTTTACAACCCGGGCGCCAGACAGCCAACAAGTGATGCAGACTCCACC  
AACGACTTTCCAAGTCGCAACTTCTGGTTTGTGATCTCAAGCAGTCTCTTAACAACAGGGAAGCGCTGCG  
GCTCAACAAGGTTGGCCGCCAACGGGTCACTATTGAGCTTCCGAGGAAGAACAATAGTATAAGGCAGTGT  
TTCCGCTGCTTCGAGTTCGACCACACCAAAAACTACTGTCTCAAACAGCCCAAGTGTGGTAGGTGCGGTC  
AGTCCCATTGGACAAACTCCGAGCAGTGCCAGGCCAAAACAGTGGCAGACCTGCGATGCTCCAAGTGGCA  
GGGAAACCATGCTGCTTCCTATAAAGGATGCAAAAGCTATCAGGTGAGACTAAATGCCAGGCAGCCGGCC  
ATCAATGTCTCCCTCCTACACGATATAGCCATCCTCAAAATACACGAAGAACCACTCAGCAGTTTCGTACC  
TTCCCGAATTGTGCAACAGGGCCTGTCGTATGCTGATGCGCTACGGCCAGGCCATCATGTACAAGTCCGCC  
AACCCCCAGCGCGCACTCTTCAGCCCACCGTCAATCCAATGCAGCTCCAACAACCACTGCAAGGGGCCTC  
AGGAGCAAGACGCTTCCCTTGAGAGCATCCTTCAAAACCTCCAGCAGTCCATTGCAGCACTGAATGCCGC  
AGTTGCAACCATTCTGGTTAGCATTAAAGAGCTAAAGGATGCGCAAGGTTCCCCGCAGCTTAGATTCCCA  
AAAAGCCGCAATAATGGCTACCCAGTTACGTCTCGGATCGTGGAACGCTCGTGGCATCCTCCAAAATGC  
TAACGAGCTCAAGCTTTTTCTGAAAAAGCATGATGTAGACATCATGCTCATCTCAGAAACACATCTGCAC  
ACAAACTTGTACCTAACAATGGAGGGGTACGTCTGCTACCGTGCGGATCACCTACAGGACGAGCCAGAG  
GTGGTGCTGTAGTGCTGGCAAAGCAGGATTTAGCACACTACCATCTACACACAGTGACCTCCAGCGACAC  
ACAGCTGGCTGCTATCATGGTGGAGACTCCCTTGGGCGAAATCCTCGTTGCGGCAGCATACCTACCACCA  
AACATCCCCTGGAACCGAGCGGAATTTGATTCCCTGTTTGGCCAGCTTGGCCCCAAATTCATCGTTGGAGG



CGACTTCAACGCTAAGCACAGACTGTGGGGAAACTACAGAGCTGACAGCAGAGGCACTGCGCTCCATGA  
GGCGCTCACTCCCTGCTCAGCCCAGGTACTGGCCACCGGTAGACCTACCCACTTTCCGTACAACCGGCAA  
AGTACGCCTTCCTGTATCGACTTTTTTATATTCAAGGGCATCCCCAACAGCGTACTATCGGTTTCGCGAAGA  
GTATGATCTATCTTCCGACCATCTGCCACTCCTCACAACGATCAACACGGCTGCACAAAGGATCCCCAAA  
AAGCGCAGGCTTGTCTCCCTGGGTCGAACATCCAACGATTTAAGGCCGAACATAAGCTTGATCAACC  
TAAACACGCAGATTCTGTGTCAGTTGAGGACGTGACGCTGCAGTACAAACCCTGTTGGACCAAGTACATGC  
CGCAGCCGCCAACGCTGCGCCCGCACATATCTACTCAGCCCCTACAAGCCAGCGGCCAAGGACGTTTTCC  
CCCATATTGGAAGGTCTTCTCGCCCTAAAAAAGCGACTGAGGAGGGAGTATGTCCGTACCCAGGACCCCA  
CGATTGACAGGATCTATCGTCGTATTGCTAACAGGGTCAGGAAGGAGCTGATTATCTCGAAAAGAAATGC  
CACAGACACCATGCTGGAGGAAGCAACGGCAGACGAGAGCTCCAAATTCGCGCTGTGGAAACTTAGCAG  
TCGATACAAGCGGCAAGCTGCGCCAAAGTTCCCCGTTGACTTCCCGATGACACCTGGGCCAGATCACCA  
ATGGACAGAGCCGAAGCCTTTGCCTGCAACTTGAGAGGAGCGCTTCAAGCCGTTTGAGACCGCATCGCATG  
CAAGGATACAGCGAGTCGCGCAAATCCTGGAGGCGCCACTCCAAATGTCACTCCCTGTATCGCCAAATCAC  
CTTCCAAGAAGTAGAGCAGGAGATGAAGAGATTA AAAAAGCAGCAAAGCCCCCTGGGGAAGATCGGTTGGA  
CAACCAGACAATCAAGCTACTGCCATACAAGGCGGTGCTTTTTCTCGTCGCCATTTTTAATGCAGCTCTTC  
GGCTAGGTTACTTTCCAGTGGCTTGGAAGAAGGCACATATAATCATGTTGCACAAGAGCGGAAAGCCCCC  
TAATCAACTGGGATCCTATCGCCCCATCAGCCTCCTGCCTGCCTTTGGTAAGATTCTGGAAAGGTGCATCC  
TCAGAAGGGTCCTGGATACCCCGGAAATAAAACGCTTGATCCCGAAGTTCCAGTTTGGGTTTCGACTCAA  
ACACGGTACCCCTGAGCAACTACATCGGGTCACAAATTATATTTTGGACGGCTTTCACAGGAAAGAGTAT  
GTGGTGGCAGCATACCTTGACATCCAAGAAGCCTTCGACCGGGTGTGGCACGCAGGACTCCTCTCTAAGA  
TAAAGGACAAATTGAATCCGCAGCTATTTAGCACCATTGCGAGCTTCTAACTGAGAGAACCTTTCAAGT  
GGTGCAGGGATGGAGTAGCCTCTCAAACCAAACGCATAAAAGCGGGCGTTCCACAAGGCAGCGTCTTGG  
GTCCACGCTATATAGCCTGTTTACACATGACATGCCACAGCAAATGCAAGCAGACGGAATGATCGGCA  
GGACCTTCTGGTGGCCACGTTTGCTGACGACACGGCAATCCTTGCAAAAAACAAATGTGTGTACGTGGCA  
ACTGACCTCTTGCAGGAATACCTCAAGCGATTTGAAAACCTGGGCTTGTAGATGGAACATCGCAGTGAACC  
CTGGAAAGTGCGCCACGGTTACCCACACTCTACGCAAGGACTCATGCCCCGGACTTTTTTCTTCATGGTGAG  
CTTCTAGAGCAATATCGTCAACACAAGTACCTAGGTGTCACTCTCGACAGACGACTTACATTTAGTAAGCA  
CGTCTCTGCAGTAACGAGCAACATCAAATCTAAGATAAGGCGAATGAGCTGGCTCCTCAACTCCAAAAAC  
AACTCTCGCTCCGAAACAAGGTCTAATCTACAAGGTAATCCTTGCCCCAGTGTGGCGTTACGGGCTTCA  
AGTTTACGGTATAGCTGCAAAAACACACCTGAACAAAATTCGCATCATTTCAGGCCAAAACCCTGCGCAAA  
ATAACTGGAGCCGAATGGTATATTTCGCACACGCGACATCGCCAAGGACCTCAAGGTTCGAATGGTGGGCG  
ACATAGTCAACAGGCAAGCAGCGAGCTACTCAACAAAGCTCCACAACCATCCAAACATCCTGGCGAGGA  
GCCTGCTAAGGAGGCGAAGAAGAAGGCGACTGAAGAGGACCTACCCAACCGACCTAATCGATCGTTATG  
TATAGGTGACAAGCTTCGTTAATTACACCAAAATATGTTTCTGTAATCTGTAACTAATTGTATAACTAA  
TTGTAAAACCACAATCATCGCTAAGCTAAGTAATTATGTCACCTCTGATAAAAGTTGCTAACATAGAGTAA  
CAGGATACCAGATTTCTTAATAAACAAAATATAAAAAAAAAAAAAAAAAAAAAAAAAAAAAAAAAAAGGA  
G

>160\_rnd-1\_family-292\_\_Unknown

GGAAGTTGCCGGATCTTAGAGTGCAGGACGGACTTCTGTTCAAGAGGACCGTGAACGAGAGCTTGGAGG  
ATGAGGTGCAAGGCACAAGTTGGAAGCTCTGGGTGCCGGAGTCGCTGACTGCAGGACTCATCCAACAAGC  
ACACGCGGACGAGACGTCAGCTCATGGACGCTGCACGCGCTGCGCAGGCGGTNTTACTGGCCCGGCATGG  
CCGTACAGGTCAGGGACTGTGTGCGGNAATGCGATACATGCAAGGAGGCCAAGGCACNAACTNCCGCA  
TGCAAGTGGGTCTAGGAGGGGAGGTAGTGCACCGACCGNCCNTTCCAGAAGCTATATATCGACTTCTGGG  
AAAGTACCCACGGTCGAAGCGAGGGCACGCGTGGATATTCGTNGTCGTNGACCATTTCTCGAAATTTACC  
TTCCTGAAGGCNATGNNGGCGGCCACCGCGGCGGACGTCGTGGACTTCTAGTGCGCGAGGTGTTCTNCA  
ANTTTGGCGTGCCGGAGGTNATCCATTTCGGATAATGGACGACAATTCGTGTCAAAGTCGTTTCGATGCGAT  
GGTCCAGGCGTTTGGCATTACTACCCGCGCGCACCAGTGTATTTCGCCTCAGAGCAACGNCGCCGAACGN  
GTGAGCCGCACAGCGCTGTCTGCAATCAGAACNTACCTNGGNCGGGATCATCGCGATTGGGACGCGTACC  
TNCCGGAGGTGGAGGTGGCGATCCGGAATGCCGTCCACAGCGCNACCGGGGTGACCCCGTTCTTCGCGGT  
CTTCGGACAGCANATGTACCTGAACGGTTCCAGTTACAAACTGGCCAGGAAGCTGAGATCNTTGGCCGAT  
CACGGTATTTCCGACCTTGACGCGAAGGACAGACTGNCCGTAATCCGAAGCCGAGTCAAGGACCANCTGC  
ACACCGCATACGAGCGAAGTCGCCGACGATACGACCACCGCGCGCNCAGCTCCATCCGGAACCGGGAC  
AGGAAGTGTGGAGGCGCAACTTCGCGCTAAGAGACTTCGGCAAAGCCTTCAACGCCAAGTTTCGCCCGGAA  
GTTCTTNAAGAGCCAGAGTCGTCCGAGCCGTGGGCANCAACGCNTNCNNGCTGGAAGATCTNNAGGGAC

GCGCGCTAGGNGTNTTCCACGCAAAGGACATACGAACGTAATCGTAATTTGCTCACCTCCCTACCAGGCA  
ATGGCGGCGGCAACGCCCCTCCTCCCTTTTTTCTTTTGGGTCAGTGCGAAAATATAGATTACTTGTCGTGG  
GTGTGGCCTACGTTGGGCGTCGTTATTAGCCGGCTGGGTCAATCCATGAAATGCGCACGCAGATTCCCTTGT  
AACGGTCGTTTCGCGTCGTTACAATAATCTGCGTGGTGATGTTGCATTTGACGTTATCGGCGGCACCGAGGG  
TTTACTTAGTTGGTTGCGTGCGATATTATCGGCCACGCCGATATCTTTTTGTCATATGGTCAGAGTATGCGG  
GGTGAAGCTGGGCCCACGGCGGAGCCCAAATTTTCGAAGGGTGGCAACGCCGGACTTGCGATCCACGGC  
GCCAAAAGCGACGATTGCTATTGGCCGCCCGGTTTCGCTCCCAAAGAGATAAAAGGGAGAGTGGATCGCAT  
GCCCTTGATATGCCCTTGGCCGTCATTTCGGGCCGTTGACCCAAAAAAAATGCAGCTGTGCAGATGGGCA  
GCAACGGTGCCCGCCTCGTCAATGTACGCGTGTGCCGAANTTCGGCACCNTGATGTTGCTGCCCAATGT  
ACGGGGAGTTCGACTTTGTCAGCGGTCCACAGCGGACGTACCGGCTCGCAGTTAAAAATTTTTGAAGTTG  
GATATTTTTTTTTGCCGGCCACGGAGCATGTGCTTAACCAAAAAGAAAAATCAAAGGGCATAACATTTGTT  
CATGACGGGCTTTCTTTATTATTTAATTGCCAAGATAATTCCTTATGTGCTAACGTATTGCAAAAGAAATA  
GTGCACAAGAGCGATAATACACGAAACAATAATACACCAGAAACACACTGTCGTCATTTAAAACCACTAT  
AAAAGCGATACTCTATTAGAGCAGCCGCAGCCATTTCGGTGGCACACCACGCTTGAATCCCGCGCCGGAGG  
ACGCTGGCCAGATCAACCCAGGTATTCACGGGCCGGATTTTCAAAGCGCGGCCAAGTGTCGGCGTAACCA  
CACGACGGAGAGACGAGCCATCACGGACGGGACTCACACGACGAAGAGGGCGGCCACGGGGCGAGACCAC  
GCCCATATCATCCGAGTGAGTCTGTTCCATTTTCGTGCCTCCTCGCCTGAGTAAACGGCAGAGTCAGACGCA  
GACTTCCCATTGTGCTCCCTGAAAGAGAACCGATTTTTTTTTTGGAAATTGTTAACTCCAGTTTTTTTTTTGT  
AATTAAATACATAAAATACTCACGACTAGTTTAAATTAAGTAAATTTCCGAAAGTGCGAACCGGGAAGGA  
AAGGGCCCAAAGATTATTGCGTCTGCCAAGTAAAGAATGAAATTAAGTTTAGATTTTGGTCAACTTAT  
GCACGAGTGATACCCACTTATACGTATATATATATATATGTTACGCACCTCAGGTGCAGGTGCCCCCACC  
CAGAGAGCTCTTTAGGCAGGCAAGGTAATATAAGCGCTTTGACAAACAACGCCTTTCGTTGGAAACACAT  
ATGTATACACGCATTTATTTTAGCGGGTACTTGCTCCCATTTGGTGCAATAATTACCTGTGTTTATATTTCT  
CCCCTTGTTTTCTTTCTTTGTTGACTGGCAATAACTTCTGGCCGTTTTTTTTTTGGTCTCCGGTATCGTATG  
AAGGTCGCCAACAAAAAAAAGATATTCTGTACAAAAAAAAGAAATTTAATATATTTAAGATTAATAGA  
AATTGTTATAAATATGAAATGATGCAACGCGTTATAGATAACTGTTGAAGCGAAGTTGAAAGATGGAAAA  
AAATTGAAATTTAAACTTATATCCATTATTCTAAATATAAGAATATACCAACTTATCGTATGCACCTGGT  
TTAAATGCCGGAATGTTTCGCGAGTACGAAATTATAAATAACAGCTTGAAGATAACCTGCAGGGGAATA  
AGAAATAAGATTAAATGTTAATAACGATAAGAAATGCAACCAATTATATGCCGTATCTGAAGAGAGAAAT  
GTCCGGCTAAATTTTCTTTGATGGGGAGAGTTGGCATAACAGCCGGCACAGGCTGATGGCCATCTAATGG  
CGAAATGNGGGAGACGAGTAGGTGATCGTCTCATGGTAGGGCGGGTACGCTGGGTCCGGAACCGGGGCC  
CGATCTGGAAGAGTAAGGTGGATAAATAGTGTTTTTTNTTAATTTATATTGAGCGTCTCACCTTTGTTGTTT  
ACATGTTTCATAGTTGTTACAGCTGTTTATTTTGTTCATGAGTTAGAAGTTCCGATTGTTTGACGTTATCGAT  
TTGTGGTTTCGCTTTGCATAGTGTTGTGTAAGTCTGTTTTGCTACAGACGTGTAGCTTCGTTGTTATCGATTG  
TGCGGACTGCGGGCCAGGGATGGGACTACACCCAGAGAAACCGATGAGCCAGCCGGCGCGGCCACCAG  
GAAACAAGCAGTTCCGTAACAATATGGCGCCCAATGAAGAAGCACTCGGCTTCTTTGAAGTCGGTGCGTA  
ATCAAAGAAAAATAAATACGATATAAATGAAGGTACAGAGAAAAGGATTCCCTTTGGCTTCAGGACCCAC  
ACCGCTGAAGTCTTATGTGGCACGAGTAGGTAGCTCATAATCGCGCAGCGTGTAAGTGGAAATCCGAGAAGC  
ACGACGGAAGTAGAGAATATCCATAAACATGAGAAGTTTTCTTGTAGTGTTGATGACGGTAAGTCACGT  
TCGCATGTTGGCGAAACGTTTCGCGACCGTTTATCGTAGCCTGGTGGTAGCCGCCACGACAAAATAAATTGT  
GATAGAATGTGATATTAGGGTAGGTCTTACTAGAGTTTGTTTAATGTTTTCTATTTGTTTTGTCCCCTCTG  
TGCTAACGTTTGGGGTGTGCTGGCCGTAGTTAAATGAGCTTCGGAGACAGGTGACCCAGGACGATATAAA  
GCCGATCCTGCGCCGCACCTGTCACACAGCATACCCTAAGGGTGCCCAGAAGTGCGACAGAAACCAAATA  
GCCTTCAAGGTAGCGTTCCTTGAATGCCGTTTCGTCAGTCAAACNGACGAACTGAGCATTTGACGAATGCTT  
AAGTGTTGTCCACTGTCCAGATTATGCGTAGATTAGTTAGCCTGTGTTAGGATTTGTCTTCTCTCCCCAAG  
TATTTGAAATTAATTAGAAAGAAAATTAGTAAGATTTGTTAGTGGGTGTTTATTTATTTATTAATTTATTAG  
GAATATTGGTAAAGTTTTTTTTTTTATATAAGGGTAGTAAGCCTTGTAGAAGAGAGGGGTACAGTTCTCAGA  
AGGGATAAGTATGGCTGAGGAACAGGTGTCTGATTGGGCTTCTGACGCTGACGGGGCGTCGGCTCTGCTA  
CCGCCGCGCCCGGCTGGGGCGCTGGTGCGAACGCCAATGAATTTCCGGGGATTTCAGAGAGACAGATCC  
CGGAAGAGGGTCACCTGGTAGACTTGGAGAAAGAATTGGCGCAACAAGATAAACCTCCACGGAACCTGG  
AGTTCCCAAAGCCCCGAAAGACTCAGTGCTCAAATCGGCGGCAAACGCGGCGATCGCTCAGGCCACCA  
AACGTATCGGCATGCTCTGCCATCTGGCATCAGCGAGTCCATCCGCGAGGAGATGCGAGCTGGCTTCATG  
GAAATGATGAAGGGCATCATTGATATGATCAGGCCGCCAGGGAGCCAAGCCGCCGAGACTAACACTGCG  
CCGAAGCCGCCGAGACATGCCGAGCAGGGACCACGAACAGGCGCCATCCCGAAAGAACGGGAAGTGTTT

CAGCGCGAGGCATTTCCACCACCGGTGCCACCGAAGCCACATAGACGAGGCGCACGAGGGGCGGAGTAT  
TCGTCCACCAGCCCAGATTACGTGCGCAGATGCTCAGTCGAGGAAGTGGCGTAACCCGAATAACCGCCATT  
TCCGAGTAGAGGACCGGAGAGCGGATGATTTTCAACCGGAGGAGGCGTACGCCAACGTACGAGAAATGG  
CGTACATGAAGCTCGAGCGGTGGAACGTCAAGTTCGGCGAGGACGCGATGAATTCGGTCGAGGACTTCGT  
GTTCCGCCTGGAGTTCCTGCAGAGGCAGTATCAATGCCCGTGGAAGGAGGCCCTGCGCGGTTTCCACCTG  
CTCCTGACCGGCCGCGCCCGCGAGTGGTATTGGATGCACGTGCGGCA

>Ref\_NewTE6

TATATATATGTGGGGTTTTATATTA AAAAGTTTATTATAAAACAAGTGTATTGTTGATTTAACA AATTGTATTG  
CTTAGGATGATTATCATTTCGAATCAAAGTAACACGTCGTTTCGTCTGTTTTGTTCTCAGCCTTCATACCACAC  
AGGTCCAGCGTTGAACTTTTCGTCTTAACGAGCAAACATCTTCTGCTCTACGTCCAGTACGTTGCCCTCGT  
GGCTTTGCACTGTCCTCGTTGATCGTCGTTTTTGGATAACTCGCCGTCTGCGAATTCGCCGTCTTCTTTGCT  
CGTTGTTACGCGTCGTGTATTCGTCTGTTTCGTCTTTTAGCGTGTTCGTTGTCTAGGGATTCTTGTGCTGTTGG  
TTGTGCACAGTGGGATTTGGGTATACAGCATTTACCCAACCCACATTCGGCCATTCTGACTAAGCGTTCGG  
CCCGAATGCTTCCTCGTCATCTTCATCATCGCTGCCAATGGACCATGGCTTCATATATTCGGGCACACGTTG  
CAGAATTCTTCGGCCCATCGCAATTACCTACTTTCTGGACATCATAACGCGTTGTTATGCTTAATCTTAACGA  
CTTGATAGGGCCCCAAAACTTAGGCTTTAATTTTAGGCCTCTACCAAAGTGTGTGCGTTTTATGGCAATA  
AGGTCGCCAACATTATAACGTCTTGCATGCTTTCGTCTCAAATTGTATGTATTTCTATTTTCATTTTGAATT  
TTTAAAATTTGTGTTTTTGCCTTTGCTCTTAATTCGGTTCGATCGTCATTAAATAAAGCTATTGTTTCTTTAT  
TGATTATATCTCGAATCTTCCGATCTTCTTTTGTTCATTTTTACACCAACTAAAAGCTCAAAAGGTGTGCG  
CATCAATACTTCTGGAAAATGTCGAATTAATTGCCTGCTGTACCTGGTTGATGTGTCTGTACCATTTTGTG  
GGTCATCAATGCTCAATTTTGAGAGTACTGAAATAATTATAGCATTCAGCCTCTCGACTTGACCGTTCACT  
CTTGGTAGGCCTGTAGTTGTCTTAAGTATGCTTTTATGCCTTCGTCTGTCACAGTATTTAACA AAAATCTTGCGAA  
GTAAAGGCAGAGCCCCTATCCGTAATGATAAATGCTGGGTACCAAATACAATACTTTGATTAGTTAACTT  
TGTAATGACCTCGTTTGCATTAGTAGACTTCGTTGGATAACAGCCAACAAAAGTGGTAAATGAGTCAATAA  
TCGCCAAAATGTGTTTGTAGTCTTTATGCGTTGACTCAAGTGGACCCAAGAAATCGATGTGGTAAGTGTGT  
AGGGGAACGTCTTCCTTCTGTAGTGGGTGTAGCAGCCCTTCTTGTTCCTTTGCGATTTGTTAAAATG  
CAGGGAACGCAACAATCTATATACTTTTTTATCTTCTCTTCGAGGTTAGGAATAAAGTATTCTCGGCAAAT  
TAACTCTTTGGTCTTTTTTGTGTCAAAATGGCCTTTGTTCATGAGCATAGCCAATAATTCTTTTTTGCATGTC  
ACTGGGTACTACTATTAAGTCAATCTTTTATAAGTTTGTATAGAATACTGATTTTATGAAGTAGTCGTC  
GTATGCTTTATTTTTATCGGTTAAAAGTCTTCTTAATTGCTTTTATCTTTTCGTCTCGGGCTTGTGCATCTTTC  
ATAGCAATACTGATACTATCTTCGTTGATTATCATTACTGGGTATCTGCTTAAAGCGTCGACGTGCTTCATT  
CTTGTGCCAGCTCTATGTTCTACTGTATAATCGTATTCTTGTAGGAACATAATCCAGCGTGCCACCCTGGT  
GCATAAACTTTGTTTCTCTAGAGTTTTTGGCAAATGCATTACAGTCTGTTACAAGTTTAAAATGAATACCTA  
GAAGATACACTCTAAAGTTCGTCAATGCTTCTATGACTGCCAAAATTTCTAACTCATAGCTGCTGTATTTA  
CGTTGGGCATCTGTAGTCTTTTTTGTACATAAAGTAAAGTGGATGCAGTTGACAATCTTCGGGGCTTTTCTG  
CAATAAAAGTCTCCAAAGCCATCAATCGATGCGTCTGTGTGTACCTCTGTCTCACACGTTTGATTGTAAA  
TACTTAACACAGGGTTTTTCAAGTAAGAAGCTTTTTCAATAAGTTAACCGAATTCTCCTCTGCTATTTCAATTC  
TAAATTTGCTTTTATTCTTGGTCATCTCCGTTAAAGGTCTAGCTATTGTAGCATAATTTGGTATAAATTTTC  
TAAAATAGCCTGTCAAGCCTAAGAAAGTCTTCTACCTGCTTTATTGTTTGTGGCATCTTAAAGTCTAGATACA  
GCTTCAATTTTTTCTGGTGATGGGAATATCTTTTTATTACAGATCACATGACCAAGAAATTGAATACGTTTT  
CTTTAAAAAATGCAATTTTTTAATGTTAAGCTCCAACCCATACTCCTTGCATGTGCCAATAACTTCCTTTAA  
ATGTTGCACCGCTTCTAGCTCGTTTTTGGCTGGTATGATAATATCATCTACATATGGCAAAGCAATTCCTCT  
GCGTGACAGGTGACGAAATATCGCGTTAACATGGCGTTGAAAAACACCTGGTGAGTTTGAAAATCCGAAC  
GGCACTCTCAGAAATTGATATTGTCCTCGATGTGTTACAAACGAAGTATATTTTCTACTTGATTCTGCCACT  
GGTACGTGAAAAAATCCATTTTTTAGATCAATTGTACTAAAAATATTCGCTTCTTGTAAATCGATCCAGCTG  
ATCCTCGATTAGTGGTAAAGGAAAATGGTCTTTAACAATTACCTTGTGATTCTTCTATAATCTATGCATA  
GCCGGGTTGAACCATTCGCGTTTTTAACAAGTACTATCGGGCTAGTAAAGTCTCGGATGTAGATTCTTCAATT  
ATGCCATTTTCAAGCCACTCATCAATTTGCTCATCGACAATACTCATTTCCGTAAACGCCAATCTGCGCGG  
CCGTGAAAATATTGGTGCTCATCTTTTACTACAATGCGCATCTCTACATTTGTTGTCTTCGTCTTATTTGG  
TTCATAGTTCGAAATAAGTTCTCGAACTTCTTGTTTAGCATACTCACTTGCTGTGTCTTCTATGTGCTATAC  
GCAGTCGAAGTCTTCAGGGCAAATTCTTAGTATATTTATCTCTTCACTGTTTGACATTTTGCGAACTTGTA  
ACCGTTACGACTAAATACAATCTCAGCCTGTAAACATAGTTCTTCGCCAAGAAATAACTTTGACATCAATAC  
ATTTAATTGGAACCACGTAAAAATCAAGTATAAACTCTTCATCGTCAATAAGAATTAGATGTTTAAAATGT  
CCAGTTGGTTTTATTTTATTCTCACTGCGCTCACTGCCGAATCCAATAAGAAAAACATTGCAGATTTCTAG

CTTCGGCTTGCCAATTTTACAATAAAAAGTCTTCACGGATGATATTGAATTTGCTGCCAGTATCAAATAACG  
CTACACATTTCTTATTTGAGAAACATACTTCTTTACAGGATAAATCGTTTTTGGCTTGCAAACCTGCGTGTAT  
TTGATATTACGGCCTCACTTTTCTCAATTTGTTTACAATCTTTTCGAGATGTGACCGTATTGATTGCATCTGA  
AACATTTTTTTTCTTTTATTTTATTTTGACAATAATTAGACGTATGCCCTTTTTTACCACAGTTAAAGCATTT  
CACATCTTTTTTTGCATCTTTGCTTACGTTGAAAGCTTTTTTGTCTCTTTCTTTAACACTGCAATCGTTACGC  
TTTGTTTTTTTCTTTTTCGACTCGACACTCTTTTTCAATCATTGTTTTATAATATTTCAACTTTTCTTTGAATTG  
ATTTAAATTTTTTCGCACCGTATAAATATGGATTTGTTTCCACCTCTCTCATCTATTCCGTCAATTAAATACTG  
TATGAAAGCGTCATCTGCAATTTTACCTCGAGAAGCAATGTCTTTCATTCTATAAAAGAATTCGAATACAC  
ACTCGTTGTTGCTGCGTTTCGTCTGCGCGAGCTGTTTCGTGAATTTCTTTGCTGCTTACACTTGAAGTGAATT  
CTGCCAAGAGTGCTCGTTTGAGAGAGTTCCAAGTGCTTAAACCTCTCTCACTCAATACGAAGAGTTTCGCT  
ATTCCTTTAAGTGCCTTTTTTTGCGAACAGAACTTCTGGAAATCGTTCCAATACGTGAGTGTTGCCTGCTCT  
TCATATTCTTTTCATATCCACACTTCTACTGGGAATAGTGTTTGTGCCGTCAAAACAACGAATGCTCTCTTCC  
ACGTCGCGAAAGCTGATCGCAAAGCGAGGAGCAATTCGTAATTTTCAGCAATTCTCCTAGTTTTTCGAGTT  
TTCCCTATTTTCGAAGGTCAGCGGTCTGGAATGAAGCGTTGTCTGCTTCTCTCTTCTATTTTCATTTTCGTCGTC  
AGTTGCTTCTTCGTCTACTTCGTTGAATTCCATCAAATTGTTTTTCATCAGATTACGAAAAATGTGTCCATG  
CAAATCTGCGTGAACATATTCTATACCTAGAATGTTGCATATTGATACAAGGTCAGCCTGCGTTAAATTGT  
TCAATGCGTATTCCTTCTTCGCACTATACTCTGCGTCATTTTCTGTATACTCGAAGCCAGAAAATTCGCGTA  
GACGTTTGCGATTATTTCTGTCTCCCTCATTTTCAAAGATGAACTTGTGCAACGCAGTTATGCTCCCTTTTT  
TGCTTGAGCGTAAGCTAGCACTTATTAATCATTAAAGGCACGACATTTTTTTTTTTGAATAGTTTTTTTTTT  
TTTTTTGTTTTGCACAATTGTTGTTGTAACGTAAGATCGTTTTCAACTTTATTCCTCCTGTTCAATCTTGCA  
CAATCTCGCTCACTTTTGCTCACACTTGCTCAATCTCGCTCAATCTTGCTCACACTTGCTCAATCTCGCTCA  
ATCTTGCTCAATCCCGGACGAGCGCCCAAAATGTGGGGTTTTATATTA AAAAGTTTATTATAACAAGTGTA  
TTGTTGATTTAACAAATTGTATTGCTTAGGATGATTATCATTGCAATCAAAGTAACACGTCGTTTCGTCGTT  
TTGTTCTCAGCCTTCATACCACACAGGTCCAGCGTTGAACTTTTCGTCTTAACGAGCAAACATCTTCTGCTC  
TACGTCCAGTACGTTGCCCTCGTGGCTTTGCACTGTCTCGTTGATCGTCGTTTTTTGGATAACTCGCCGTCT  
GCGAATTCGCCGTCTTCTTTGCTCGTTGTTACGCGTCGTGTATTGTCGTTTCGTCTTTTAGCGTGTTTCGTTGT  
CTAGGGATTCTTGTGCTGTTGGTTGTGCACAGTGGGATTTGGGTATACAGCATTACCCAACCCACATATA  
TGTA

>9\_rnd-1\_family-355\_\_LTR\_\_Pao

GCCCGTTGGCGCGAAGAGTATTTAACGCTTCTTCAACAGCGCTCCAAATGGCGCACTCCTCAGCCAGGATT  
CTCCATCAACGATGTCGTCCTTGTAAGGATGAGAACCTACCGCCGCTGAAGTGGCCATTAGCTAGAGTT  
CTAGAGCTGATCTCGGGATCTGATGGGGTATCTAGAGTTGCAGTGCTTCAGACTGCGACTGGAGTCATAC  
GCAGAGCCGTACGAAAGCTGTGTTTGCTGCCAAAACAGGATGATGTTGAAAGTCCCTTGCCTTCCAACGG  
GGGAGGATGTTTGGTCAAGTGACCGGTAGAGATAACAGCGACGGCTGCGTGCAGTAACAGCAGAAGACA  
ATAANCATAATTACAGCTTAAGAGCAAATGATGTTTGCTCTTTGTAAGTTGCTGCCTACTCTCTTCATCGG  
CCCTTTGCCTCCTGCATTGACGCCCGCTGCCCATCGTTCTGAGCGGAGCTCAATTTTCGTTTCGTTTTGCATAT  
AGTTTAGTTTTTCGTTTGATCGCAAGCAAGGCACAGCTATTTTCGAGTTGACTGCCGAGCAATATTATAACA  
TTTCGTAAACTATAATAAAAAGTGCCCTGTGCGGTAAATAAATACATTGCAAACAAAATATAAAACNTCGA  
ATTTTCGTTGCACACAAAGCAGTGCTAATTAATTAGTTGCAAAAAGGCTTGTAACACTACACATTTTGGTGACC  
CCGACGTGATTTTTTCTTTATTACTTTTTTCGTTTCCCTTCTGTTTCGCATTTTGTTTATAATTTTCATTTTATAAT  
TTCATTGCGCATATTTACAAAAGGTTGTGCGTTAAGTGCTGCGAGCCTCAACATAAAGTGATCAATTTAAC  
CAAGTCTCTCTAATAACTGTACTTAACCGCTTGCTTGTGCATATGCATACAGTTTGTGCTTGTACATAGAC  
GCCGTAGAAAAATCGCCGTTAATCGTCGCGCGCTTTAACCAGCTATACGCTATCTCGCTCGAACAAACACT  
TGTGCGCGCAAATTTTGTATTGTAGTTTCGGCTGTGTGAACTTTGTTGTGCGCTACATTAAACAATGTTTGATG  
AAGGTGCAAGTGCAAATGAAAATGAGGCGACATCTGCTAATCAAGTGGCGGTTGGAACACAGGCTGCAG  
TTCTTAAAGTTAAGATTAAGAATTTAAGTGATCGAGTCAATAGATTGTCCTCTGAACTTGATCCCGCGCGA  
CTTCGCGATGTTGATGACTACGAGCTGCAAGATTACATATGCATGGCATCTGACTTGCAAGGCGAAATTTGA  
AACANTCTATGATAGTTTGTGTTGATGTGAGTCAGGCCAGCGTTGAAGAGGATCTTCAGTCAAGCTTTGAGT  
CAACCATTAGGCGGCTACGAGTGTCCCTTCAACGCGAGCGCGGAAATCGAAGCAAGATTCAGCAGACTCC  
ACATTGCTCCACTTTCAATTCCGCCGCAGCCGATGATCCGCGCTCTACTTTTGTGTTGCCAAACCACTCTCG  
ATTGCCTCAACTTAAATTGCCGGAGTTTAGTGAGGATACACAGAATGGTCTGACTTCTCGAATATGTTCA  
CCACGGTCATTGATAAGGATCCGTATTTGACCAACATTGAAAACTTCAGCATCTACGGTCATGCCTCAAA  
GGAACAGCGCTGGATACAATTCGCTCGTTGGAAATGTCAAACGCTAATTATGCTGCCGCCCTAGAACTGC  
TTGATAAGCGTTTTTAATAACAAGCGTCTTGTTTTTTCAGGCACATATTGCTGAAATTTTGGGTTTAAGAAAG

GTGGATAAGGGTGCGACGACACAACCTGCGCGAATTCTCAGATAAGGTCAACTCTCATTTACGTGCGTTAA  
AATCGATGGGCAGTGTGGAACAGATCGCCGGCTGCATCATAGTACACACACTGCTGCAAAAAGTAGATAG  
CGCCACGCAAGCTAGCTGGGAGGATGATGCGCCGTTGGACGTCATACCATCATGTGAGCGGCTTACAGCT  
TTCATTGAGAAGCGTTGTCAAAGGCTGGAAAATGCGGATCACGCGACGGCAATGTACACGCCTGGCTCCC  
AGGTGGGCCAGAACACAGTAGTAGAAGAACGTTTGTGGTGACCAAGAATGGAACATATGCATGTGTATT  
TTGTGAAGCCGCGAGGCCACTCCATTTATAAATGTCTGCAATTTCGCAAAATTATCGCCCTCGCTGCGCCTTC  
ATGAAGCCAAACGGCTTGCCTGTGCCTTAATTGCCTGCAAAGGGGACATCAGCTGAGAGTCTGCGGTTTC  
CAGCACTTGCAGAGTCTGTGGAAGCAAACATCATAGCCTGTTGCATCTTGGCAACACAAGCAGTCACAGC  
GTTGCTTCTAGCTCACACAATGTTCAAGAAGCCGAAACTCATACGTCATCTCAAAACATCCTGGCGGCAA  
CTTCATCGTCGACACTCTCCATCGACCAGCATCTTAAGCACGATGTGCTCCTACTTGCCACTGCCGTCATC  
AATGTAAAAAATCGCGCTGGCTCCTTGGTGCCCTGCCGTGCGTTGCTCGACTCTGGGTGCGAATTGCACAT  
CATCACCTCTCGTCTTGCTCATCAGCTCCAGCTGCGCAAATTCAAGTCCACAGCAGTCGTCCTCTGGCATTG  
GTGATGCAGCGTTTTTCGTGAGATGGTTTTTCGGTAAACATCAATGTCCAATCTCGAGTGTCTGAATACTCC  
ACATGCATCCCGGCATTGATTGCACCATCCATCACCGATAATCAGCCTGGCTTCACTCTTGACCCTGCATC  
ATGGAACATTCCGTCAAACATACTAGCTGATCCTGAATTCTTCAAATCTCAGCAAATCGACATGTTGA  
TCGGAGCCAGTCTGTTTTTCGATCTGCTCTGCGTTGGCCAGATCAAAGTACTGCTGGACTGCCGATACTG  
CAAAAGACTCGCTTTGGTTGGGTGCGGACTGGAGGTGCTCCACATGCAGGAAAATCATCGCTCGTGGCTA  
GGCGATTAGTGATGAATCCAGATCTGCTGGTAGACTCGCATCTGCAGACGAATGCACAGATTGACGAATT  
AATCCGTCGGTTTTGGGAGCTGGAATCTTGTACCGAGCCTGAGTCATCACCAAACAGGGAGGAGCGTGAC  
TGCAGGACACACTTTTCAAGGCAATTTTAAAGCGTCTGCCGACTGGCGAGTATTAGTTTCGCTTACCGCTTCG  
ACTAAGCCTGGATCAGCTGGGTGACTCCTATCAACAGGCGCTTCGCCGATTCTTAATTTAGAAAGGAAA  
CTAGACCGCAATCCAACCTTTGAAAACCCAGTATGCAGCATTTATCAAGGAATATCTTGACTTAAATCATAT  
GTCACTTGTAGCTTAGCTGCACTGGGCCAATGCAAATACTATCTGCCACATCACTGCGTGCTGAAGGAGG  
ATAGTACTACAACCAAGCTAAGGGTCTGTGTTTGATGGATCAGCAGCTACTACCTCTGGACACTCGCTGAA  
TGATGCACTGATGGCAGGTCCTACCATCCAACCGAAACTGTTTTTCGATACTGATGCGTTTTTCGTACATTTCG  
CAGTCGCCCTCACAGGCGACATATGCAAAATGTATCGATGCGTACGGAGTCGAACCAGCAGACAGCTATC  
TTCAATGTATCCTGTGGCGTGATTCTCAGCATCAGAAGATACAGACTTACAAATTAGACACCGTCACCTAC  
GGCACAACCAAGCATCGTTTTCTCTCAGTGCGGGCTATGCACCAACTGGCCATGGATGAGCAGCAGGCAT  
TTCTATTGGCGCTGACATTATTAAGGGGATTTCTACGTGGATGATCTCATCTCTGGTGGTAGCTGTGTTTC  
AGGAAGCAGTCGAGATATTGAAGCAAACGTCTGGACTACTCGCCAAGGGCAACTTTAAGCTGCGAAAAT  
GGTGTCTAGCGACGCTACTGTACTCCAAAGCATAACCGGAAGAGGGATAGAGAATCGCTGCTTAAGTTCA  
ACGATGGCAGCGATATCACGAAAACGTTAGGCCTCGTTTGGGATCCCGCCTCAGACTGTTTTCTTTTTCT  
TTCTCCACTGAGGCTACCCTCGAGACTGACAAAACGATCAATCCTCTCCTCAATTGCTCGTTTTTTACGACC  
CCTTGGTCTTGTGGTCTGTAATAACAAAATCTAAAATTTTTATGCAGGATCTCTGGAGAGAAAAACTGG  
ACTGGGATGAGAGCTTGCTGTACACTTAAGCACAGCCTGGGTCAACTTCTGCGCTGATTTTGAGCAGACT  
CAGCAATTCAGTATCCCCGTCGTGCACTCTCATCAGACAGCACAGTTGAGATTCACGGATTTTGTGATGC  
CAGCCTGAGCGCTTATGGGGCATGCGTCTATACAGTTTCAAAGTGCCATGGCAACACAAGCGTACGTCTC  
TTGTGTTCCAAGTCGCGTGTGCGGCCTGTGAAAACCATCACTGTACCAAAGCTGGAACCTCTGCGGAGCTGC  
ATTATTGGCTGAACCTCTCAGCGAAATCTGCCAACTGAAAGTGTTTAACTGTCGTTATTACTGTTGGTCAG  
ACTCTGCTGTAGTTTTGGCTTGATTTCGCAATGATGCTTCCAAATTCAATATTTTCGTTGCCAATCGGGTCG  
CAGCCATCCAAGAGCTCACCCTGGCATGGAATGGCATCATATTCCCACTGAATTAAACCCGGCGGATAT  
AATTTACAGAGGAGCGCTGCCAGTGAGCTTTCCAGGTCTCCGTTATGGGGCCATGGCCCGAGCTTTCTCA  
GAAAGGAAAAGGAAGAGTGGCCTGCCTCCTGTGTACCTGTCGAATCCTTGCCAGAACTCCGACACAAGGT  
ATTACTCGGAACTGCAGCGCAACTTGATCTCTCAATTGGCTGCAAGTTCATCAACTCGTTCTCCAAGCTGC  
AACGCGTCTTTGCTTACATTTACAAGTTTGTAATTCGAATCCGAGGATCTGAGCTAACTGTAAGCCACGTG  
CGTCATGGCACACATCTGTTGCTGCGGTGAGTGCAAATGGCTACTCTTGGCGATGACTCACAAGGGACTG  
ATGGAAGGAAGGCCCGTCAAACGGTCTAGCTCAATGGCCTCTCTCGCGCCATTCTTTGACGACTTCGGCTT  
ACTCCGCATCGGTGGACGGCTGAAAAAAATTCGTCGTTGGACTTCTCAGCGCGACATCCGATTATATTGCC  
TCGCCAGCATCCTGTGACCCGAGCAATAATAATCCACTTTCATAAACGGAATTTGCATGCTGGACCTCGCG  
CCGTATTGGCTTCGATTTCGGCTCCAATACTGG

>9\_rnd-4\_family-24\_\_LTR\_\_Pao

GTTACACAGAATGGGCCGATTTTTATTCTATGTTACAGCCGCCATAGAAAATCATCCTGATTTAGCAGAT  
ATCGAAAAGCTCCAGCATCTTCTATCGATGCCTGAGAAGGATTAGCGCTGGANGCGATTCCGGATCATTG  
GAAATAACAAACGATANTTATGCCATAGCACTTAAANTATTGGAGAAAAGGTTTAATAATAGACGGTTGG

TTTTCAGGCACACATACTCGAGATATTGGGAGGGCTCAAGAGGGTGGCAGGCGGATCGGCCGTGTCGCTT  
AAAGAGAGTTATCCGACTTCAATTCAACGCACATATTCGCGCGTTAAAGATCATGGGCAACTCCGAACAG  
ATCGCTGGATGCACCATTTGTGCAGATTATTTTACAAAAGCTGAACGTAACATCACACGCCAAGTGGGAAA  
AAGGCTAAAGGCTTCGCCNNTCGTCAACTTAATACCGTCGTGGGAGCATATGGCTACGCTTCTGGAGCAG  
AGCCATCAGGTGGGAAAACTAGAGCAATTAACACNAGTAGATCGTCATTTATCGCCACTAACCACGANG  
CCCCTGTCTGTTTCTTTTGTGACAGCCCTGGTCGTAGTATNTATAATTGTNCCCGATTTGGAAATTCGACCC  
CCTACGGCTAGGGAGGCAAAACGAGTTGCATTGTGCTTGAATTGCCTAAAGANAGGTCACCAATTGCGAT  
CATGCAGCTCTGGATGCTGTCGGACCTGCGGGGCGAAACATCATTNCTNCTGCATTTGAATAATAATAAT  
TCCGTATTTCCGTCTGGTCAGCTGACTGAGCCTGCNAATTCATCGNCGATANCCCATGCCTCTTTTCGCTAA  
GTCGTCGCCATCTANCTCCACATCTCTTGTGTTGCCAGTATTCCAGTAGTGATGTCGTCNTCTTGGCTACNGC  
TATGGTCTTCNTTAGAAATCGNTCCGGCACTTTGATACCTTGTCTGTGCCCTTTTGGATTCCGGCTCTCAGC  
TTCACCTTATAACNTCGCGCCTTNCTCAACAGCTTCAGNTAAAGAAGCACAAANTCCTCANCCATCGTCTCT  
GGTCTAGGACAAGATTCTCGTTTTTGAACACAGAAGGAAACACGGTCACTATCACAATACAGTCTCAAGTC  
TCTGAATACTCAACATGCCTCACAGCTCNGGTAGCGCCTAACAATAACTGATAGTCAACCGAGTTTTACTA  
TCAACACGACGAATTGGAACATTCCCGATAACATAAACTTNCAGATCCGTCTTTCTTTAAANCTCAACGC  
GTGGACTTNCTANTTGGAGCTAGCCTGTTTTACGACCTTCTCAGNGTCGGCCAGATAAGGCTTCTCCCAGG  
ACTACCGTGTCTTCAAAAAACACGGCTTGGTTGGGGTAGTTTTCTGGAGGGCGGACCNCGCTTGAGTGGTTCT  
ACGTTAATGGCAAAGCANACTGCGGGCAAGCTTGAGTCAAGTTCTGAAGAACGTGCTGATGAATTGGTNC  
GAAGATTTTGGGAGATAGAATCCTGCTTGGAAAGTACACCTACCCTTCAAAGGAAGAAAACATCTGTGA  
NGAACATTTTCGTAAAGACTCATATCAGATTATGCCTAGTGGCCAATATTCAGTTCGTTTACCCTTCAAGCG  
AAGTTTGGAAATGTCTGGGGACGTCATACCAACAAGCCTTTCGTTCGNTTCTTGACCCTGGAGCGCAAATA  
CAAATCGTCCAGATCTGAAGATTAAATTCAANNTTCTTAAAGGAATACTTGGATCTTNGTCATATGTGCG  
NTATTGCTCCAGANTCTATNGGACTTTGTCAATACTTTCTTCTCATCACTGTGTCTTTAAAGAAGACGGTT  
CAACGACAAAATTGCGAGTCGTTTTTCGACGGCTCAGCAGCTACCTCGTCAGGTTATTCATTAAATGAANTA  
TTGATGGCTGGACCTGTTATTCAAAGCTCGCTGTTTCATATCCTTCTTCGCTTTCGTAATTTCCCGATCGCC  
CTAACAGGAGATATACGGAAAAATGTATCGNTGCGTACGCGTTTCAGNACCGGGCGATTTTCTCCAATGC  
ATTCTGTGGCGAGACTCGCCGAACAGGATATAAAGATTTTAAAGCTGGATACAGTTACATACGGAAACAAA  
GCCAGCTTCATTCTCTCTATCCGTGCTATGCATCAGCTGTCTATGGATGAAGAANNTAATNTTCCAATTG  
GATCTCGGACTCTGCGGCGNGACTTCTACGTTGATGACNTCATTTTCAGGNGGTGATTCAATTCGAGAAGC  
ANAGGAANTTCTTAATCAGACGGCTGGAATNTTGGCAAGTGGGGGCTTCAAGTTGCGAAAGTGGTGCTCA  
AACAAATNCTGCTGTACTGAAAGGGATACCCGTAGAGGAACAGAGAATCTTCCCTAAAGTTTGATGATGGT  
AGCGACATCACAAAACCTTTGGACTCGCTTGGGACTCAGCGTCGGATCGNTTGTGTTTTTCGTTTTTCGTC  
CATTCAGCAGAGATCTAAACCGTCCAAAAGGTCAATACTATCGACCATAGCTCGCTTGTATGACCCGCTTG  
GACTCATAGGGCCGGTAATCGCCAAAGGCTAAAATCTTTATGCAGCAGATCTGGAAGGAGAAGCTTGAGT  
GGGACGAGAGCTTGCCATCATCACTGGCAACAGCTTGGCATGATCTTTGCTGCAGTTTTGAGAAGGCACA  
GTTTCTTAAATTTCTCGAAGCATATGGGGCCTGTGTCTACGTCCTTTCTCGACGAACATCAGCCAGTTGTC  
AGCTGTTGTGTTCCAAATCGCGTGTAGCTCCTCTGAAAACAATCACAGTTCCAAAGCTAGAGCTCTGTGGT  
GCCGTCTTATTATCTAATCTCATGCGTGAGATATCTAAAATGAATCTGTTTGATGGAAAATTCTACTGTTG  
GTCGGATTCTTCTGTATGCCTTTCTGGATAAGGACCGAGCCCTGCAAGCTCAATGTGTTTGTGGCTAATC  
GCGTCACAGCAGTTCAAGAGCTAACTAATGGCATGGAATGGCGTTACGTGCCTACTTCACTCAACCCGGC  
AGATATACTCTCGAGAGGATCTACGCCCAGTGAATTAGATCAATCGTCACTGTGGTTCAACGGCCCAGAA  
TTTCTAGTTAAAAACAAATTGGACTGGCCTGCTTCTTGCTTGTGAGAAAGGACAGAACTCGAACTTAAAA  
AAAGGGTCCTTATTGCGTCATCTCCCTTCGTTGATATAACTGTCACTTGTAATAACGTCAACTCATTTGATA  
CAATGCAGCGTATATTCGGATATATTTATAAATTCATACACAGAAGCAGGCATCCTGGACTAACAGTGTCT  
GATATACAACATGGGACCCAACTCTTACTAAGGCTCGTCCAGAGAGCACACCTGTGGGAAGAGATCAAAT  
CATTGCAATCGAGAAGAGTTGTTAAACCGTCCAGTTGTATCGCATCACTTAACCCTTTTTTGATGATTTTCG  
GAATTCTTAGAGTTGATGGGCGCTTGAAAACTCTTCGCTGGATTTTCGACGCTCGCCATCCAATAATTCTC  
CCGTGTCACCAACCCCATCACAACTCGGTTCATCACACGGTTTACAATCGGGACTTACACGCTGGTCCACG  
GGCACTTCTTGCTCATATTCGGTTGCAGTATTGGCCGATTGGTGGAAAGGAAGACCGTATCCAAGGTGGTTG  
GAAAATGTGTGAGATGCTTTCGTGCCAAGCCTCGATTAATAGAGCATATAATGGGTGATCTGCCCAAAGA  
ACGTTTGACTGCTTGTGCGAGCCTTTGAAGTCTCTGGTGTGACTATTGTGGACCATTTTCTATAAGCCAGAC  
GTACGAAATAAAGCTCCAGTCAAATGTTACATGGCCGTCTTCGTCTGCTTCGCGACTAAAGCGGTTACCT  
GGAAGTGGTCAAGGATCTGTGCGACAGCTTCTTTCTTGAATGCGCTTAAGAGGTTTATATCGACTCGAGGCA  
GGCCATCTCAGATATGGTTCGGATAACGCTACCAACTTTGTGCGGCGCCAAAACGAGCTTCTGGATCTCAA

CGGTCTATTTACAAGTCGTAATCATATTGAGTCAGTGCATAATTTTTGCATGGCTGATTCCATTGATTGGA  
AATTTATACCTCCTCGTTCACCGCATTTTGGCGGCCCTTTGGGAAGCAGCAGTGAAGACAGCGAAACATCAT  
TTTTATCGTGCTGTTGGATCTTGTGTTCTCAACTTCGAAGAGTTTCGCACCCTAGTCTGCCACATAGCATCG  
ATAATTAATTCCAGGCCATTGTTTCCTCTTTCAGAAGATCCAGCAGATCTAGATGTGCTCACTCCAGCTCA  
TTTCTTGATTGGTGGACCCAGCTCATCGTTCTTTGAACCTGATGTGACGCACCTTCAATTCAATCGTCTGGA  
TGGTTGGCAACGCGTAACGTACCTCCAACAACCTGTTTTGGTCTCGCTGGCGTGAAGAATACTTAACACTGC  
TTCAGCAGCGCTCCAAATGGCGTACTCCGAAACCAGGCCTATGCGTCAACGACATAGTCCTCGTAAAGGA  
TGAAAATCTGCCGCCTCTAAGGTGGCCACTGGCGAGAATCACAGAGTTAATCGTGGGAAAGGATGGAGTC  
GCTCGAGTAGCCATTTTGGCGACCGCAACAGGAGAAACGAGAAGAGCTGCAAACAAGCTATGCCTATTGC  
CCATCAGGGAATCTGTTGAAAGCCCATGCCTTCCAACGGGGGAGAATGTCTGGTTACGCAGCCAAAACAA  
CTGGAGCGACCTCGCAACTGATAAGAGCAGCATCTTAATTTTATCTTATAATACTCGCTCTGCAAAGCAAG  
TGCCTAAATTTTCGCTCTTAAGAATTCATTTACATAGAGCTGCCGCTCTTCGCTGTAACGATCGTTTTATTGC  
CCTAGCTTTACTTATGCGAAGGCCTCGATGCTGCGCATCGAGTTAGTTAAGTTCGTTTCGCTTCATGCATTTG  
GTACGCATCGGCCACTTGCATTACTCAAAATTATAACTAATAATTGTCTCTTCGCTAAAATTGGCACGTAC  
TAATTCGGGTTTCGCTTGCCTATATACAACTATTGTTCTTAAATAATAAGCACAGACCAATTCGGGTCTGC  
CTGCTTCTCGTAACTTTAAGAAATATAAAACAATTTTGAACACAAAAAATAAATAGTTAATTATTTCTATT  
TGTGAAAGCTATTGAAAAAGCTCAATAGCGCAACA

>160\_rnd-5\_family-9199\_\_LINE\_\_R1

TACCTGGTTGACGAACCGCACTGCTCTATTTGCGCTGCTTGCACTGTTTTACTCAGGTTTGCACTGCTTTTT  
AAAATTCCGCACTGCTTCGCACTATGTGCACTGCTTATAAAGCAGTGAACGCGTTTGCACTGCTTCGCACT  
GCTTTCGCGCTGTCTTGGGCACAAGCAGTTTTATTGCTATTTACCGCAAGTTGTCCCGTTAAGTTTTATGGC  
TTTGTTTACGCCAAAGCGAACACCTGCACCTTATCTTTTGTTTTCGACACAAAAATAACTCCGCGACACGT  
CTGCTCGCGACGANCGTCTGGAACAACTGGTAGATAGGGACAAAACAAAACATATTTGTTTAACGTGGC  
GTGTACCCCGTAGGGGTTTACTACCACGGTATTTCGAAATACAGCGAGCCGAAACAAAGCGTCGGACTAGC  
GCCCCCTCCAAGACACTGCATGTGCAGTGCCCCCTTCGGTACCAAATTGAATGCATGCTTGTGGAACATGACA  
TTCCCCCTTGGTGGGAGGTGAGGTCTATCTATACCTCCGCTGGTCTATGGGTACAGCACCCGGTTGACACG  
CAACTCCACGCCGAGTGAAAACTCTCCCCACAATTGGGTATCGAACCACAGCCACCACGATACTCCCCGA  
AGGGCCGCACCAACTAACCAGGACGGAACGAGTTCCGTGGGCTCCTGGTTACCCGTGGTACCAAATTACA  
GCTTTGGTCGGCNGTTTCGTAGCAATTGCCACTCCCCAGTTTTGTGTTGACGACAAACACGGAATGGGTGAT  
CCATTGTTTCGACTTACCCCAAATTGGGGTTTGTCTACCAGATTAAGCTCTGTTTCGGCTTCGTGACACGGTC  
CATGCCACTCCCAGTTTTTGGCTAACGTCAGCCCGGCACTGGTTCGGCCCTGTGTGGTTGCACTTCACTCCAT  
CCCTCGCCGCGCTCTAGCAAACACCGCTCGCGCAAACATCTCCAGGAGTAGCAGCCGCTCTGGTGTCTCC  
AGGACCCGGGAAAAGTCCCAACGGGTACCTTCTCTCCTGACACCAAGTCCGTCGAGGTCTCGCAGATCTG  
CATAGAGTGGGCAAGCAACTAGCACGTGCTGCCAGTCTTCATGCTCCGCACCGCATTGACATGCGGGCGT  
TGCACTCAGACTTCTCTGATGCAGAAATGCATTTAGCGACCCGTGGCCCGTCAGCAAGAATCCAGCGTGA  
AGACCGAATCCAAAGTCTCGCCGGCTGTAGACGAAGCATGCGTCCGGGATAAACTGATGAGTCGGTCGAC  
CGTGCTCATCACTATCCCATCTCCGTTGCCACTCGGAGCACATGCCTTCGTCCAGCAACGCCTTCATCCGC  
CTCTGGTCTAGATTTGCCACATCTAGACCGAACAGCCAGTCACTATCCTCCAGCGGGTGGGCACGCTTGAC  
CTTGAATCTGATTGCCAATTGCTTGGCAACCAAATCCAACGGCGGAGCTCCAGCAAGCACCTGCAGTGCC  
ACGGTGGACACTGTACGGCATAACCGGTAGGCATCCTAAGAGCATGACTCTTTGGCAGGAGATGAGGCGCC  
TCCTGGCCCCCGACTCTCCCCTGACCGCGGAATACCATAACGAGGCACCAAACAGTGCGCAAGGCACCAT  
GAGTCCGGCATATACAGTGCGTCTGGCTCGGGGACTGAGGCCCCAGTCAACCCGTAGCACGCGGCCTAAT  
GCTCCGACGACTCCAGTCAGTTTATCCCGCAATCCTGCGATATGCGGCTGAAAATTCAACCGTTCACCGAC  
TGTGATGCCAAGGTACCGGTACTTGTGACATATGGTAGGCTTGCTCCTGCAAACCGTACCACGGGCGGC  
CTGGAAACGGCAAACGCCCCTTCAACATCATCATTTGCCGTCTTGCTGGTTGAGATCGACACTCCGACCTC  
GGCTCCCCAAGTTCCCACGACGGACATCAGCTCAGCTGCTCGACGCTCCAGTTCAGCTCTCGACCTTCCCT  
CGACAAGAACCAGCAGGTCATCGGCATATGCACTAAATGTGCACAAGGGCTCCAGGCGTTGGAGCAGGA  
CATCCATCATGGTGTTCAGATGAACGGCCCACTGATGGATCCCTGGGGACACCCTCGCGTGACCTCCACC  
TCGACTTCGCCACATCTGCTGGTCATCCTGGCTTTTCTGCCACAGAAGAAGCTTCTCCACAAGCTAGCTTC  
CTTGCAATCCCGCATCGATCAAGCGGCGCATCGCGGCGCTCCACTCAATGTTGTCAAAGGCGCCTTTAAAGT  
CCACGAAGAGACCAAGTACGTATAACCGCCTGGCTGGCGGCAACGCTGGTCATCACGTGCTTCCAGGCGTC  
CTCGACACAGCGTCCAGGTCGAAAGCCAAATTGCCATCTATTTCCATCCGGAAGCACCTCCTTCATTTCGAT  
CCACCATGATCCCCTCAAGCACTTTGCCAAACACTGGCAAACAGGCAGATGCCCCGATAGGAAGCTGGATC  
GCTCCTATCCTTGTGCGGGGCCCTTGAGGAGCGCAACCACACGCGGGCACTTCCACTCAAGGGGAAAGTAT

CCTTCTGCCAGGCAGCGGGAATAACAACGCTGTCAGGTGCTCGGGGATGGCACGCCATACCGCCTTGCAGA  
TCCCACCTGTAATGCCGTCAAGCCCGGGAGAGCGCCTGCTCTTCAACCGAGCGACGCATACTCCAACCTC  
GAAAGCTTCGAGCGCTGGAGCAGCTTCGTCCGGAATGACGATGTCTTCACTCGACTCCGCAACTGGAAAA  
AAGCTGTGGAGGAGGAGACTCGCGCAGTCGTGCCATGTTACGACCAGCCCGTCATCCGAACGAAGGCACC  
TCAAATCGGTAGACCGCTTTCGTCCCCGGCATATCCGGTAGACGTGCCCCACGGATCGTCTCTGTGGTCT  
CCAACGAAGCGTCGCCAGTTTTCTCCTTCGTCTTCAGGATGAGCGTCTTGAACCTCGCGGACAGCTGTCCG  
CAGATGAGCTGCAAGATACGGTGCAGATTCATGACCTCTGCGCCGTGCATCCTGGAGCCTCCGCCTCAGT  
CTCCTGACCTCCCGGCGTTTTGGTACTCAGTTCGGCAGTCCACCATTAACTTTTCCCTGGGCTCTCGACGGT  
CTGCGGCCTAACACTCTGTGCGACACAGACTGTACGGCAAGGCGTAGGGCAGACACCGCGGTATCCAACG  
GCAACATCCTAATATCCTCCTGGGAAAGGTGCTCCTCGATTTCTCTACCAGCTCCGAGTCGAACAATCGC  
CAATTAGCATTTCGCGAGCTTCCAGGACGGCACAGGAGCATAGCTCTCAACTGCATTTGCTGGGGATGGCG  
AAGTCACAACAGTAATCATGTTGTGGTCGCTCAAATCCCACTCGTCCACACTCCAGTCATACGCGGCCAC  
GTAGACGCTGCTTCGTTACGATTGTTACGTCGATATCGCTCTGTCTCTTCCATTATCGAACGTGTACACC  
TCGCTGACTTGATTTAGCACGTTGGCAGCACTTCCGAGTATCCACTCATCTAGCTGTTGCGCTCTTCTGTAG  
TTCAGCTGGCCACGAAAGAATTCGTGCCGTTTGCTGAACCACAAGGGAGACACAGCGTTTGCGTCCAGGC  
TGAGAATTACCGGTGTACTGCTCGCCAGTAGCAGTATGGTATCCATATAGCTCAATATCCTTGTCAAGTCA  
GCATGAGCATGGCAGTATATGGAGGTCAGGTAAACAGTGCCATGTTTACCTGTGACCCTCACACATACTC  
CAGCCTCGGTGGTCAGCGACTCCACTGGTAGGCAGATGGCATCTGGGTCGTCGATGATGACAGCAGCGCT  
CCTTTTCCGGTCCTCGACAGCGTGGCTTCCGAAAACGCGCATCCCGGCTGGGAAGCCCGTAATCCTTCCAA  
CGACGTCCGAGTATGGCTCCTGCAGCAGCGCAAAGGAGTGGCCGTGGTCACGCATACGTACACCGATATC  
GATGCACGCAGCGCGGCCCGGCCACAGTTGGCTTGGATGAAACTAAACATTAATGTTTAGCTTGCACCC  
TCGCCAACACTGCGCCATAAATCGGGCAAGACCCCGAAAGCATATAATGCCCGGAGGGTAGCCCCTTGAA  
GCGGCAATTCCGGCAGTCCACCGGATTTGCGCACTTGGCTGCGATATGCCCCATCTGTCCACACTGTGCGC  
ATACGTCTGTCTAAGGCGGCACTCGGACACCTTGTGGTTCGAAGCCGACACACCTATGGCAAGCATAGGT  
GCGGACGAGGGACCGGCATCGGTATGAAAACCACTTTATATAGACCCGTCCGGTCTTTTTCAAAGTCGCC  
AGGGCCCTCTCGTCAACTTCTAGCGTCAGATTAACGCTGGCGCCATCAGTGACGGACCACGGCTTCGACTC  
AAGGTGTACTGCCTTGTGTAACACCGCTGCTGTCATCTCCTCCTTGAAGTTGTTTCGTATACAACTCCTCCAT  
GAACACCTCGGGCAGGATCGATGTGTCCACATCGAACACCGTTATCCTCGGCCTCAATCCTTTGTTTCGGCT  
GGATGTTGAGTCCAACCTCCGCGAACTTGGTGTGTTGCCACCACTCTGTTGAGCTCGCCCTTCGATGGTGTG  
CGGATGACCGCGCCGCTCGCTTGAGCTCTCGCACCTCGTGCACCCGCACTCCAAGGGTGGGTGCGACCT  
CCTCCATGATCCGTTTGTCCACCATTTTGCCCGACTCGCTCGGGTCCCGACTCGTGACCACCGCGGACCAC  
GTCTCAACTGGCTTGTGATCCGTGGGGCAGCGATCGGCACTCCTGGGACGGGGACAGCGGTGCGGGCAG  
CATGGTGGGCAACTTGGTGGACGACTTGGTGAAGCAGCAGTTGGGGTGGGGGCGGCGAGCTGTGCTGCAG  
ACGATCTGCCTGCCAGGCTCTCGAGCAGACCGTTCCGCACTGCCAGCGACGTGGACAGCTCCTCCAATCG  
CTTAACGGCTGCCGACACTTCGCGCGCGGCTTCGGGGGCGACACCCACCAGGGCAAGGCGGGTCATTTTCG  
GCAGCTGCCGAAAGCTCCGCTATAATCGCCCCTGTCCCTCGGCCATTATCCTCCATGCTGGGGCAAGCGC  
GATGATGGGGGCGGCAGCGGCAGCGGCTCTGACGTCTTCTTCTGCAGCGGCAGCATCAGCGGCTCTTTTT  
GCAGCAGCCCTA

>160\_rnd-1\_family-138\_\_LTR\_\_Gypsy  
ACAATGATAAGCGACAAAATAAAATAAAATAAAATGAAATTTCAAGAAATATATATATATTCTTATT  
ACCAGAAATGCCTATTAATAAGTTTGCGATAGAAGTATATTTAGAAGCAATATATAATAGCGACGCAGAC  
TTTAGAATTCGTGCATTGAATATTCTACAACAATAAGATAAAAGGCATAATTTTAAATACACTGCCATATG  
TTGGCATTAAAGAAATAGTGGTCCAGTGGACGGCGAGTGCCCAATTATAATGGTAAAACCTTCATAAATAG  
AGAACTATGGAATGGAGTGAATTAGCGAAAAAAATAAATAATTTCAAAGATAAATTCGAAAAATCTTATA  
AGTGTGTTAATAAGAACGCACCTATAAGGGTTGAAACGCTAATTCACCACATAAACATATTAGTGCTAAA  
CTATAATAACATAGTTCAACTTTATTTAAGTAAAGAAAATAGGCTTACAGAGCAGCATGTAAATCAATGT  
AAGAAAATAATCAAATCACTTGGGACTAGAATATCGAATATCAGCACTAGGCACAACATAGTAATAGATA  
TCCCAACAGATTTAAAATTAATGGCAACTTTTGAACCAGATCAACTAGAAGAACTGAATGAGTCTAAGCC  
AACACTAAATAGTGACCCTGATATTGAAGCTGATAGCGACATTGACCCACTTGAATTAACAGAACCAAAC  
ATGGCAGTAAATCAAGTGGCCTTAGACCGCGAATATGTAAGACAGGTATCGTCTACAGTCCCGGAATTTG  
ACGGNAAGAAAAGCCGTCACTGGCCAGATTTCTAACGGCNTTAAGACTNGTCGACCGNACNAAGGGNAC  
TTACGAGAAGACTTAGCCGTAGAAGTCATAAAGTCNAAAATAATTGGCCCAATCCTGTACAAAGTACAAA  
ATGAAACNNCNATTANCGGNATTATNAATAAATTAANACCGTAGTTGTCAAAGGCGAGTCAACCGACGT  
CATCAAGGCNAAGNTGCTTAACACTTTAAAGCAGAAAGGCAAGNCAGCCNCGCAATNTACAGCTGAAAT



NGACAGTTTTCGCGTAAGCAACTNGAAGCAGCCTATATTGACGATGGCATACTAGATTCTGATAACGCAGAG  
AAATTTTCCACTAAGGANACAATANNNGCCGTGACAAAGAATTGCGAGTACGAAAAGCCTCGCATAATGT  
TAGAAGCGGGCAANTTCGGCANTTTCAATGATGCCATGGGTAAATNTGTCAATGCAGCACTGAAACGACC  
GTGCCAGTACAATACTGTACTACGAATACAGAAACNACCGTGGAATTGCGGNCGTAAACAACCANAGAG  
GTAGAGGCAATAGCCGCGGCAACAGTCGTTNCAANTACAATGGTAATAACAACAACAGAGGTAATTACA  
GAGGNAATNACCGCGGTAGNGGCCGAGGAAGAAACAATTCNAACCGAGGCCAAAACCAAATAATAAC  
AATAGAGGTAATGTCCGAGTAACCCAAGGTAATTCGGAAAACCAACAAAACCCCTCAGATGTTTCAGAGCC  
AATAAATGGCGCAGTNAANACCATCAACCTCAGTCTNAGCATATTTGTAAAANTTAACAATGNGAGAACA  
GGTAAANAACCTTGCACTNNTAGTAGATACTGGTGCAGACATATCCATATTAAGAAAATNCNGATATAT  
TCGANGACGTAAACGAGANAATTACTACCCAAATATCGGGNATNGGCCGAAGGCATAATTCANTCCAAAG  
GNTTGGCCTCTATAGAGNTACANACAGGTAAATACATAATTCACACAGATTTTCATTTAGTCGATCAACAN  
TTCGCAATACCTNGTGATGGCATACTAGGCATAGATTTTCATAAAACAATACAATTGCCAATTAGATTTCAA  
NCAAAGTGAAGACTGGCTTATAATNAGACCAAACAACCTTAAATTNTCCAATTTATGTTCCAATAATCATA  
CAGTTCTGGCAATAATGCCACAGTACTCCCAGCNAGNTCCGAAGTTGTCAGNGAAATNCAAATACCNTCA  
ANAGAAGATAGTGTNCTGATTCCAAATCAGGAAATTAANGAAGGNATTTACGTCGCAAACACNATTGCA  
ACAACCAAATAATGCATTTGTCCGATTACTNAATACAACAAATACCGATCAAGTAGTNAATATAANAATT  
TANAATATGAACCACTTTCGAACTACGACATAGTCAAAAANAATCCAGAAAATAGAGAGAAAACCTGCGTT  
ATCTNAATTAACNAAAACTTTCCACCNCNATTCAAAAATCAATTAAGAGACTTATGCACCAAGTATACC  
GACATATTCGGACTNGAAACCGAATCGATAACNACNAATAATTTTTACAAACAAAACCTNAGATTGAAGG  
ATGATGAGCCCGTATACATAAAAAATTATAGAAGCCCTCACAGCCAAGTANANGAAATNCAAGNNCAAG  
TACAAAAATTAATCGACGACAAAATAGTCGAACCGTCNGTCTCNGAATATAATAGCCCACTTTTATTAGTT  
CCGAAGAAGTCNCTTCCGGGCTCTGAAAAGAAGAAATGGCGATTAGTAATTGACTATCGTCAAATTAATA  
AAAAACTATTGTCCGATAAATTTCCGCTNCCTAGAATTGATGATATTCTAGATCAACTAGGNAGAGCAAA  
ATATTTTTTCATGCCTTGACTTAATGTCAGGNTTTCACCAAATTGAACTCGAAAAAAGTTCNAGAGATATAA  
CGTCATTTTCAACGAGCAATGGCTCGTATCGCTTCACGCGATTACCATTTCGGNTTAAAAATAGCGCCAAAT  
TCATTTTCAGAGAATGATGACNATAGCATTCTTCTGGNCTAGAACCNTCNCAAGCATTCCTTTATATGGATGA  
TCTAATAGTNATCGGTTGTTCCGAAAAACATATGGTCAAAAACCTTAAGTATGTTTTTCGACAAATGTAGGA  
AATNCAACCTGAAACTACATCCGGAAAAATGTTCAATTTTTTCATGCATGAAGTCACATTTTTGGGACACAAA  
TGCACNGATAAAGGAATCTTGCCAGACGACAAAAAATACGACGTCATTAAGAATTACCCAGTCCCACACG  
ATGCGGACAGCGCTAGACGATTTCGTTGCATTTTGCAATTACTATAGGCGCTTTATNAAAAATTTTCGCCGAC  
TATTCACGTCACATAACAAGATTATGTAAAAAAGACGTTAANTTCGAATGGACAGCTGAATGCCAGAACG  
CNTTCGAACATCTCAAAACGGCACTAATAAACCCNACNTTGTACAATATCCNGATTTCCGCAAAGAATTT  
TGCATAATAACAGATGCAAGTAAGCAAGCGTGCGGAGCGGTTTTAACTCAGAACCGTAACGGACTCCAAC  
TTCCAATTGCATACGCATCAAGATCNTTTACTAAAGGAGAAAGTAATAAGAGTACAACNGAACAAGAGTT  
AGCGGCAATTCATTGGGCAATAACNCATTTTNGACCATATATTTATGGCAAACACTTCACNGTTAAAACG  
GATCACAGACCATTAACATATCTNTTTTCAATGGTCAATCCAAGTTCNAAATTAACNCGTATGAGGCTNGA  
GCTNGAGGAATACGACTTCACGGTAGAATATCTAAAGGGNAAAGACAATTNCGTAGCAGACGCGTTATC  
GAGAATAACCATNAAAGAGCTACAAGATATAACGGAACAATAAAGAAAGTCACTACNAGGCGNCAAAGT  
AGACAAAAATCCTGCGCAGGAGAAAAANNAATAGAATTGCCAAGGCAATCTATAGAAAAAGCNTCNAAG  
CCCAACGTATACGAAGTCATTAACAATGACGAAGTACGAAAAGTAGTGACCTTGCGCGTAAANAATATGC  
TATGTTTATTTAAACATGGNAANAAAATTACCGCAAGANNCGANGTTAGCGATTTATATACCAATGGAAT  
CCTCGACTTAGGTCAATTCTTCCAAAGGCTCGAAACGGAAGCCGGTATATNNAAAATCAGCCAACCTCAA  
GTGGCACCGTGGGAAAATATCTTTGAACACGTTTCAATAGATAATTTCAAAAATATGGGCAATAAAATAT  
TAAAATCNTTAAGAGTAGCGCTACTCCACCCGGTGACCCAAATANAAACGATAAAAGAGAAANAAGCTA  
TATTGTCTACATNCCATGACGACCCAATACAAGGAGGTCATACNGGCATNACAAGAACCTTGGCCAAAGT  
CAAAAGACACTACTACTGGAAAAGGTATGACNCGNCATATAAAAGAGTACGTACGTAGATGTCAAAAAT  
GCCAAANGTCTAAAACAAAGACGCACACAAAAACTCCTTTAACTATAACNGANACACCTGTANATGCTTT  
CGACAGAGTGATAGTGGACACAATTGGTCCGCTACCCAAATCGGAAAATGGNAATGAATACGCAGTCAC  
ATTAATNTGCGACCTNACNAAATATCTAGTCGCNATTCCAATACCAAACAAAAGCGCAAATACNGTCGCA  
AAAGCTATATTCGAAAATTTTATACTCAAGTACGGTCCAATGAAGACGTTTATTACGGACATGGGAACAG  
AATACAAGAACTCGATTATAAATGATTTGTGCAAGTATNTGAAAATNAAGAATATAACATCNACTGCACA  
TCATCACCAGACAGTTGGAACAGTAGAAAGAAGTCACAGAACTTTTAACGAATACATACGNTCATATATA  
TCGGTNGATAAAACTGATTGGGACGTATGGNTCCAATATTTTCGTTTATTGCTTCAACACGACCCCATCNAC  
GGCGCATGANTATTGTCCATACGAACCTAGTATTTGGTAGACTACCGAAACAGTTCATAGATTTAAACAAA

ACTAATACATAGANCCTATATATAATNTAGATGACTATGCTAAGGAAAGTAAGTNTAGATTAGAAATAGC  
ATACAAAAGAGCTAGAATTATGTTAGAANAAGATAAGGCATATAGGAAGTTAGCATATGACGAAAAAGC  
AAAAAACTTTGAATTANAAATAGGAGATAAAGTCTTACTAAGAAACGAAACAGGNCATAAATTAGATCC  
AGNATATTTAGGACCNTATANAGTAGAAAAAATAGAAGATAANGATAACATNTTAATTANGGATAGTAA  
AAATAAAAAACAAANAGTNCATAAGGATAGATTAAAAATTTTAAATTCATAAT

>9\_rnd-1\_family-356\_\_LINE\_\_I-Jockey  
CACTTACGTTTGTGTTTCTCTGGAGATCGGACGTGAAAATTGCAGTCTCGTGTGTGTGTGCGCGTTAGTGC  
ACCGCTGGCAGCAGGCATAAACCAAGAAAGTGACATTGACACTGTATAAAGCCCCGCCCCAGGGCAATCC  
ATACAAATCCCGCTTATAGTGGGTAAACTATACGCAACTGCTGCCTCTGGCAGCCGGAGTGTTATACAAA  
TTAACAATATTTTAACAAAAAAATTACCGCGTGCAGTGCGTGAGAACAAGTTCTTGCAAACTTAAGCTG  
CGCTCAGCTGATCGCAACTCAAGTGCGTGTGTGTGTGCGCGAGTGACAGCAAAGCTTTCGCGAGAGAGCTT  
TCAGCTTGCAGCTGCACTGATAGTGCTGGCAAAACAGTCACTGCAGTGACAGTGCTGACACTAAAGTCAC  
AATTTGTGATCAATCACTTGTTACAAAAATACGGGTATTTTTTGTAAATTAAGTGTA AAAA ACTTGTTTTGTTT  
TTTTTTTTTTTTTTTTTCTCCCTGTGGGGAAAAAAATTATAACAAAGTAAAGAACAATGGCTACAAAACA  
ACCGACCCCAAAACAACGAAGAAATTCATTCGCCAATCTACCCGCTGCCGAACAGCTCAATAATATCCCC  
TACAAATATAGCCGCTAATGTGCATCGCCTCGACGGAAGCAGGCCACTGGAAGATTTTTTACCAATATTAC  
AACAAACGTGCTCGCCAGTAGTGCAAACCGGAACGGCGCCTCCACCTCGCTGTCAGCCGGTACCCAGCAAT  
GCTCGACTTGGCAACCGCAACAGCACGGCACTGTCAGCACAACGACAGCAACAACCACCACAACCACAG  
CGTCATCCAGCAGCGGCTGCGGGACATCTGCCTCAACAGGCACAAGCCGCGCCGCTTTAGAGCCCATCGG  
GACCCGCCCCAAAGCCGCCAATCCGACCTTGCAGTCCACCCCTTATGGCACCCAGGCAGCTGGTTCTTG  
TCACAAACCCCTCTGCCTCCCATAAAGAACGCAGGTGCTACGCTAGCCTTCGAAGAGCCACTGGTAGAT  
TGGCAAACGGTTTCCGCAAAAACGGCGTGGGACTACATTATTATCCGAAGGCGTAAAAAAGGGAAGCAA  
CTAAATAACCGCAACACCAGCCGCGCTGGAGCTAAGCCCGCAACTCCCAGTACCGCTTCGGCAATTAGCA  
ACAGATATGCCTCCCTTGAGCCTCAGGAAGACGCCTCTGTAATCGATGACGGCGAGATGGACACTGCCGA  
CGAAGCGCCTCCAGTCACAGACCAACAACAATCAGCGAAAAGATCTCCAAACCCAGGCCGATAACAGTC  
CCTGGAGTCAGCGATATTGTCGCAATGGAGCGAACCATAGATCAGGCAGTGGGCGCAGACGCCTATGAAT  
TCAAGGTCTCTCCCTCTGGCTATCTAAGAATTTACGCCAAAGATGCCGACACCCACAGAGCAATTGTCCGC  
AAGCTCACTGAAGTGAGAGTGCAATTTACCCACTTCTGCCTAAAGGAAGACAGACCATACCGCGTTGTGG  
TTAAAAATCTGGCCGCTTCCACTCCCAGAAGCCAGATTGAAGCTGCCTTTACATCGCACGGCCATATTGTG  
ACGAACCTTTACAACCCGGGCGCCAGACAGCCAACAAGTGATGCAGACTCCACCAACGACTTTCCAAGTC  
GCAACTTCTGGTTTGTGCTATCTCAAGCAGTCTCTTAACAACAGGGAAGCGCTGCGGCTCAACAAGGTTGG  
CCGCCAACGGGTCCTATTGAGCTTCCGAGGAAGAACAATAGTATAAGGCAGTGTTTCCGCTGCTTCGAG  
TTCGACCACACCAAACTACTGTCTCAAACAGCCCAAGTGTGGTAGGTGCGGTCAGTCCCATTGGACAAA  
CTCCGAGCAGTGCCAGGCCAAAACAGTGGCAGACCTGCGATGCTCCAAGTGGAGGGAAACCATGCTGCT  
TCCTATAAAGGATGCAAAAGCTATCAGGTGAGACTAAATGCCAGGCAGCCGGCCATCAATGTCTCCCTC  
CTACACGATATAGCCATCCTCAAAATACACGAAGAACCCTCAGCAGTTCGTACCTTCCCGAATTGTGCA  
ACAGGGCCTGTCGTATGCTGATGCGCTACGGCCAGGCCATCATGTACAAGTCCGCCAACCCCCAGCGCGC  
ACTCTTCAGCCCACCGTCAATCCAATGCAGCTCCAACAACCACTGCAAGGACCTCAGGAGCAAGACGCTT  
CCCTTGGAGGCATCCTTCAAAACCTCCAGCAGTCCATTGCAGCACTGAATGCCGCAGTTGCAACCATCTG  
GTTAGCATTAAGAGCTAAAGGATGCGCAAGGTTCCCCGCAGCTTAGATTCCCCAAAAGCCGCAATAATG  
GCTACCCAGTTACGTCTCGGATCGTGGAACGCTCGTGGCATCCTCCAAAATGCTAACGAGCTCAAGCTTTT  
CTGAAAAAGCATGATGTAGACATCATGCTCATCTCAGAAACACATCTGCACACAACTTGTACCTAACAA  
TGGAGGGGTACGTCTGCTACCGTGCGGATCACCTACAGGACGAGCCAGAGGTGGTGCTGTAGTGCTGGC  
AAAGCAGGATTTAGCACACTACCATCTACACACAGTGACCTCCAGCGACACACAGCTGGCTGCTATCATG  
GTGGAGACTCCCTTGGGCGAAATCCTCGTTGCGGCAGCATACCTACCACCAACATCCCCTGGAACCGAG  
CGGAATTTGATTCCCTGTTTGGCCAGCTTGGCCCCAAATTCATCGTTGGAGGCGACTTCAACGCTAAGCAC  
AGACTGTGGGGAAACTACAGAGCTGACAGCAGAGGCACTGCGCTCCATGAGGCGCTCACTCCCTGCTCAG  
CCCAGGTACTGGCCACCGGTAGACCTACCCACTTTCCGTACAACCGGCAAAGTACGCCTTCCTGTATCGAC  
TTTTTATATTCAAGGGCATCCCCAACAGCGTACTATCGGTTTCGCGAAGAGTATGATCTATCTTCCGACCAT  
CTGCCACTCCTCACAACGATCAACACGGCTGCACAAAGGATCCCCAAAAGCGCAGGCTTGTCTCCTCCCTGG  
GTCGAACATCCAACGATTTAAGGCCGAATAAATAGCTTGATCAACCTAAACACGCAGATTCTGTCAAGTT  
GAGGACGTCGACGCTGCAGTACAAACCTGTTGGACCAAGTACATGCCGCGAGCCGCCAACGCTGCGCCCCG  
CACATATCTACTCAGCCCCTACAAGCCAGCGGCCAAGGACGTTTTCCCCATATTGGAAGGTCTTCTCGCCC  
TAAAAAGCGACTGAGGAGGGAGTATGTCCGTACCCAGGACCCACGATTGACAGGATCTATCGTTCGTATT

GCTAACAGGGTCAGGAAGGAGCTGATTATCTCGAAAAGAAATGCCACAGACACCATGCTGGAGGAAGCA  
ACGGCAGACGAGAGCTCCAAATTCGCGCTGTGGAACTTAGCAGTCGATACAAGCGGCAAGCTGCGCCA  
AAGTTCCCCGTTCTGACTTCCCGATGACACCTGGGCCAGATCACCAATGGACAGAGCCGAAGCCTTTGCCT  
GCAACTTGAGAGGAGCGCTTCAAGCCGTTTGAGACCGCATCGCATGGAAGGATACAGCGAGTCGCGCAAAT  
CCTGGAGGCGCCACTCCAAATGTCACTCCCTGTATCGCCAATCACCTTCCAAGAAGTAGAGCAGGAGATG  
AAGAGATTAAAAGCAGCAAAGCCCCTGGGGAAGATCGGTTGGACAACCAGACAATCAAGCTACTGCCAT  
ACAAGGCGGTGCTTTTTCTCGTCGCCATTTTTAATGCAGCTCTTCGGCTAGGTTACTTTCCAGTGGCTTGGA  
AGAAGGCACATATAATCATGTTGCACAAGAGCGGAAAGCCCCCTAATCAACTGGGATCCTATCGCCCCAT  
CAGCCTCCTGCCTGCCTTTGGTAAGATTCTGGAAAGGTGCATCCTCAGAAGGGTCTTGATACCCCGGAA  
ATAAAACGCTTGATCCCGAAGTTCCAGTTTGGGTTTCTGACTCAAACACGGTACCCCTGAGCAACTACATCG  
GGTCACAAATTATATTTTGGACGGCTTTCACAGGAAAGAGTATGTGGTGGCAGCATACCTCGACATCCAA  
GAAGCCTTCGACCGGGTGTGGCACGCAGGACTCCTCTCCAAGATAAAGGACAAATTGAATCCGCAGCTAT  
TTAGCACCATTGCGAGCTTCCTAACTGAGAGAACCTTTCAAGTGGTGCAGGATGGAGTAGCCTCTCAAAC  
CAAACGCATAAAAGCGGGCGTTCCACAAGGCAGCGTCTTGGGTCCCACGCTATATAGCCTGTTTACACAT  
GACATGCCACAGCAAATGCAAGCAGACGGAATGATCGGCAGGACCTTCTGGTGGCCACGTTTGCTGACG  
ACACGGCAATCCTTGCAAAAACAAATGTGTGTACGTGGCAACTGACCTCTTGAGGAATACCTCAAGCGA  
TTTGAAAACCTGGGCCAAGCGTTGGAATATTGGCATTAAATTTAAATAAATGCGCCAATGTGACCTATGCGCT  
ACGGAGGGATATATGTCCGGGAGTATTCTTGCGCGGTCAATTGGTGACGCACCACAACAGCCACAAATAC  
TTAGGGGTGCACTTAGACAGGCGCTTGAACTTTAACAAACACATCACAAGTGTCTCNGTAACCCTGAAGA  
ACAGANTGGGAAAACCTAAGATGGCTTCTGAGCAGTAGAAATGCGTTGTCTTTGAAAAATAAAGTAACCAT  
TTATAAANCCTGCATAGCTCCCGCCTGGCGTTATGGTATTCAGGTATATGGCATTGCTGCAAAGTCCCGTC  
TTACAAAAATCAGGGTGTTCGAAGCAAAAACGCTCCGATATCTGTCTGGCGCCCCCTGGTATATGAGAGC  
TCCCGACTTGGA AAAAGACCTGGGAGTGCCCAAAGTCGGGGACGTTATAAATATACAGGCCGCAAATTAT  
ATAGCGCGACTGAGAAACCATCCTAATCGTCTGGCTAGGCGTCTTCTGAATAGGCGTAGAATTGGAGGAC  
TCCGAACGCGGAGGAGACTGCGAAGGTCTCACCCAATCGATCTCCAGATCGATTTATATAGNCGCCACT  
GTAAATTTGTATATTAGACTTACCAGTAGAATA

>160\_rnd-1\_family-214\_\_LTR\_\_Gypsy

ACAATGATAAGCGACAAAATAAAATAAATAAATAAATGAAATTTTCGAGAAATATATATATATTCTTATT  
ACCAGAAATGCCTATTAATAAGTTTGCGATAGAAGTATATTTAGAAGCAATATATAATAGCGACGCAGAC  
TTTAGAATTCGTGCATTGAATATTCTACAACAATAAGATAAAAGGCATAATTTTAAATACACTGCCATATG  
TTGGCATTAAAGAAATAGTGGTCCAGTGGACGGCGAGTGCCCAATTATAATGGTAAAACCTTCATAAATAG  
AGA ACTATGGAATGGAGTGAATTAGCGAAAAAAATAAATAATTTCAAAGATAAATTCGAAAAATCTTATA  
AGTGTGTTAATAAGAACGCACCTATAAGGGTTGAAACGCTAATTCACCACATAAACATATTAGTGCTAAA  
CTATAATAACATAGTTCAACTTTATTTAAGTAAAGAAAAATAGGCTTACAGAGCAGCATGTAAATCAATGT  
AAGAAAATAATCAAATCACTTGGGACTAGAATATCGAATATCAGCACTAGGCACAACATAGTAATAGATA  
TCCCAACAGATTTAAATTAATGGCAACTTTTGAACCAGATCAACTAGAAGAACTGAATGAGTCTAAGCC  
AACACTAAATAGTGACCCTGATATTGAAGCTGATAGCGACATTGANCCACTTGAATTAACAGAACCAAAC  
ATGGCAGTAAATCAAGTGGCCTTAGACCGCGAATATGTAAGACAGGTATCGTCTACAATTCCGGAATTTG  
ATGGCAAAAAGCTATCACTGGCCAGATTTCTAACGGCTTTAAGACTAGTCGATCGTACTAAAGGTACACA  
AGAAGACTTAGCCGTAGAAGTCATAAAGTCTAAAATAATTGGCCCAATTTTGTACAAAGTACAAAATGAA  
ACATCCATTATTGGTATTATAAATAAATTAATAACCAATATCAAAGGCGAGTCAACTGACGTTATCAAAG  
CTAAGTTGCTTAACATAAAGCAGAAAGGCAAGTCAGCCTCGCAATATACAGCTGAAATTGACAGTTTGCG  
TAAGCAACTGGAAGCAGCCTATATTGACGATGGACTAGATTTTGATAACGCAGAGAAATTTTCTACTAAA  
GAAACAATATCTGCCATGACAAAGAATTGCGAATACGAAAAGCTTCGCATAATATTAGAAGCGGGCAATT  
TCAGCAATTTCAATGATGCTATGGGTAAATATATCCAATGCAGCACTGAAATGACTGGATGCCCAAGTAC  
AATATTGTACTACAAAGGCAGAAACGATCGTGGAATTAACAGCCGTAACAACCAAAGAGGTAGAGGCAA  
TAGCCGCGGCAATAGTAATTTCCACTATAACGGTAATAACAACGATAGGGGTAAATTTAGAGGAAATTAC  
CGAGGTGGCAACCGAGGTAGAAACAATTCAAACCGAGGTGGCTACCAAACAGTAACAATAGA  
GGTAATGTCCGAGTAACTCAAGGTAACTCGGAAAACCAACGAGACCCCCTCAGATGTTTCAAGGCCAATAA  
ATGGCTCAATAAAAACCATCAACCTTAATCTTAGCATGTTTGTA AAAAATTAAGAATGAAAGAACAGGTAA  
ATCAATTACACTGTTAGTAGATACTGGTGCAGATATATCCATATTA AAAAGAAAATACAGATATATTGAA  
AACGTAAACGAAACAATTACTACCCAAATATCGGGTATTGGCGAAGGCATAATTCCTTCAAAAAGGCTTAG  
CCTTTATAGA ACTCACTACAGGCAAATATATAATTCCGCATAACTTTTCAATTTAGTCGAACAAAAGTTCCCA  
ATACCGAGTGATGGCATACTAGGCATAGATTTTATAAAAACAATATAATTGCCAACTAGATTTCACTCAA

GTGGCGACTCACTTATTCTTCGCCCAAACAACCTTAAATTATCCGATTCGATTAAAAATACTTCATACTTGT  
GACAATAATGCCACAGTACTCCCAGCTCGTTCCGAAGTTGTCCGTGAAATACAAATNCCCTCAATACAAA  
ATCAAATTCTTATATTAATCAAGAAATTGATGAAGGAATTTACATCGCAAACACGATATCCAATCACAA  
AAATACATATGTCCGTATTATAAATACAACAAATGCCAATAAGATAGTAAACTTAAATAAAAATAAAATAT  
GAAACTTTGAACAATTATGATATAGTAAAAGAAACCAACGAAGGAAGAGACAACCTTCGTTATGGAAAAA  
TTAATCAAAAACCTTTCCGCCTTTATTCAAAAAGTCAATTAAGATTTATGCACCAGGTATACCGACATATT  
CGGACTAGAAACCGAATCGATAACAACNAATAATTTTTACAAGCAAAAGCTTAGACTGAAGGATGATCA  
GCCCCGTATANATAAAAAATTATAGGAGTCCTCACAGCCAAGTACAAGAAATTCAAGCCCCGAGTGCAAAA  
ATTAATAGACGACAAAATAGTCGAACCGTCAGCCTCANAGTATAATAGCCCCTCTTACTAGTCCCGAAG  
AAGTCCCTTCCGGACTCTGAAAAGAAGAAATGGCGATTAGTAATTGACTATCGTCAAATTAATAAAAAGC  
TATTGTCCGACAAATTTCCGCTACCNAGAATTGATGATATTCTAGATCAGCTAGGTAGAGCAAAATATTTT  
TCATGCCTAGACTTAATGTCTGGCTTCCACCAAATCGAACTCGAAAAAAGTTCTAGAAATATAACGTNATT  
GTCAACGAGCNATGGCTCGTATCGCTTACGCGATTACCATTTGGCTTGAAAATAGCCCCAACTCATTTT  
AAAGAATGATGACAATAGCATTTTCTGGTCTCGAACCATCNCAGGCNTTCTTTATATGGATGATCTGATA  
GTAATCGCTTGTTCCGAGAAACATATGGTCAAAAACCTTAAGTANGTTTTTCGACAAATGTAGGAAACTCA  
ACCTGAAACTACATCCGGAAAAATGTTTCAATTTTTTTCATGCATGAAGTCACATTTTTTGGGACACAAATGCACT  
GATAAGGGAATCTTGCCAGACGACAAAAAATACGACGTGATAAAGAACTACCCAGTCCCACACGATGCG  
GACAGCGCTAGGCGATTCTGTTGCATTTTGCAATTACTATAGGCGCTTTATNAAGAACTTTGCCGACTATTC  
ACGTCACATAACAAGATTATGTAAAAAAGACGTNAAGTTCGAATGGACGTCTGAATGCCAGAACATCTCA  
AAACGGCACTAATAAACCTAACGTTGTTACAATATCCAGACTTCGCCAAAGAATTCTGCATAATAACTGA  
TGCAAGTGAGCAAGCGTGTGGAGCGGTTTTAACTCAAAACCTTAATGGACTCCAACCTTCCAATTGCATAC  
GCATCAAGATCCTTTACTAAAGGAGAAAGTAACAAGAGTACAACCTGAACAAGAATTAACGGCTATTCACT  
GGGCAATAACGCACTTCCGACCATATATTTATGGTAACCATTTACGGTNAAAACGGATCACAGACCGCT  
AACATCTATTTTCAATGGTCAATCCAAGTTCACAATTAACACGTATGAGGCTTGANTTGGAGGAATATACC  
TTTACGGTAGAATATCTGAAGGGTAAAGACAATTNCGTAGCCGATGCGTTATCGAGAATAACCATCAAAG  
GAGCTACAAGATATAACAAGAAACATANTGAAAGTCACTACAAGACANGCACGTAGACAAGAATCCTGC  
GCAGGAGAAAANGAAATAGAATTGCCNAGGCAATCTACAGAAAAAGCTTCANAGCCCAACGTATACNAA  
GTCATTAACAATGACGAGGTACGAAAAGTAGTGACCTTGCATGTAAACGATACGACATGTTTCTTTTAAA  
CATGGCAGACAAATTACAGCAAGATACGACGTTACCGATTTATATACTAATGAAACCATTGATTTAGATC  
AANTCTTTCAAAGGCTCGAAACGCAAGCCGGTATATATAAAATCAGCCAACTCAAAGTGGCACCGTGGA  
AAATATCTTTGATACACGTTTCAATGGATAATTTCAAAAATATGGGCAATAAAATATTGACTAAATTAAG  
GGTAGCGCTACTCAACCCGGTGACCACAATAAAAAATAATAAAGAAAAAGAAGCTATATTGTCTANACTA  
CATGACGACCCAATAACAAGGAGGTCATACTGGCATTACAAAAACCTTGGCCAAGGTCAAACGACATTACT  
TTTGAAAGGTATGACTCGAGATATTACTGAGTACATACGTAAATGTCACAAATGCCAGAAAGCTAAAAT  
AACTAAGCACAGTAAGACCCCNCTAACNATAACNGANACACCNGTACCCGCNTTCGACAGGGTNATNGT  
NGACACAATTGGTACCGCTACCCAGANCNGANAATGGNAACGAGTACGCAGTCACACTNATTTGTGACTT  
NACNAAATACCTNGTCGCGATNCCGATNCCAAACANAAGCGCNAGTACNGTNGCCAAANNTATATTCNA  
ATCTTTTATTCTGAAGTACGGTCCAATGAAGACGTTTATTACGGACATGGGNACGGAATACAAGAATTCA  
ATTATAAACGATTTGTGCAAGTNTATGAAAATAGACAACNTAACATCAACTGCACATCATCACCAGACAG  
TTGGAACAGTAGAAAGAAGTCACAGGACTTTTAACGAATACATACGATCNTATATATCAGTTGATAAAAC  
TGATTGGGGCGTATGGATCAAATACNTCGTCTACTGTTTTAACACGACCCCCCTCTACGGCACACAATTATT  
GTGAGCATGAATTNGTATTTGGTAAGACACCCAATCTACCAANATACTTCAATAGAATCGACCCACTATA  
TAACGTAGANGATTATGCTAAGGAGGGTAAGTNTAGATTAGAAGCAGCATACAAAAGGGGCTAGGAATAT  
GCTNGAATTAACAAGATGAAACAAAAGAAGCGATATGACTTAAATAGTAAGGAATTAATAATTATCNAT  
AGGAGATAAGGTCTTATTAAGAAACGAAGCNGGNCATAAACTGGATCCNGAATACACAGGCCCATATAG  
AGTAGNNAANATAGAAGATAGGGATAACATNCTNATTNNNGGNAACAAGAATAGGACCCAAACAGTCCA  
TAAGGACAGACTAAAAATTTTTAACGNATAATCAAGCATGCAAA

>Ref\_dvir.9.78.centroid

ATTCTATAATTTTTTTTTTTTTTTTTTTTTTTTTTTTTTTTTTTTTTTTTTTTTTTTTTTTTTTTATTTTGC  
GCTGGAATCGATCAGTGCCTTCTGATCTCTACCAAGCGGAGTTAAGGGCATAGTGTATAGTTATTATTTA  
ATAACTTAAATGATAATTACAGACTTAAAAATATATAACAATAATGGGAAAGGGATGTTTAAGTGATGT  
GCCTCGTTGGTAGGTCGTGCGGGGTGTA GCCTTCGGAGGCGCCTCTCACTGATGGGCTCAGCCAGG  
GCCCTTGCGGCCGCGTTTCGGATGCTGCACCAA TTTGTTCGGAGTATCGGCTGCTGAAGAAGTTGAG  
CTGATCTCCGACCTTTGTTAGGCGGAGATCGCGTTTCGATGGCGTCTGTTACGTACCATGGCAGGCC  
AGCAACCTTGCGTGCTGCCTTGGCTTGGACCACTCTTATG

CGACGGAGCTGGTGTGCTGATGCCGTGCCCCAAACTTGGATCGCATATGTCCAAATAGGCGTTACCATCG  
TTTTGATAAGCAGTGTCTTCGTGGATATGTGCAGCTTGCTTTGGGGCTTTAGTAGCCAATCGAGCTTTTGA  
AGTCTTCTCAGGCATTTTGTCTCTCGTTGCTGCGATGTGAGGCCCCCATATGAGCCTTCGATCCAGGTGGAC  
ACCCAAGTAGCAGAAAGAGTTGGTCTGCTCAATGGTTCGTCCATCGAACC GTAGCCCCTGGCAGCTGTAT  
GGGCGCAGCGTAAAAGTGACGCAGGCGGACTTGGCACAGTTTATAGCGATGTTCCACATAGCTGTCCAGG  
TTTCGATCTGCAGCAGCCAGTCCTGCACTGCACTTGTAGCAGCTTGCAGATTTTTTGTGGGAGGCTAGGAAG  
GCAGTGTCTGTCGCGCATATGTTGCCACCAGCAGTCTCGCAGGGGCTGAGGTCTTCGTTGCTTTGTCCTTGTGT  
GGG CAGGTCCGCGGTATACAGCGTGTACAGCATCGGACCGAGGACGCTGCCTTGTGGGACACCTGCTCTG  
ATGCCCTTAATTGCCGACCTTTGGTCTTTAACGGCCACATTAAGGTGCGTCCTGCCAGAAAGGAGCTAAG  
GATGCTGAAGTATGGCGCTGGGAGTATCAGTTTGATCTTGAACAGAAGACCATCGTGCCAGACCTTGTCA  
AACGCTTGTTTGACATCGAGGAAAACGCCGACGCAGTATTGCTTCTGCTCAAAAGCTTCTAGTACGTGTTT  
TACTGCCCGGTGGACCTGCTCGGGGCAGCCGTGAGACTTTCTGAAGCCAAACTGATGATCCGGGACCAGG  
CGCGTGACCTCGTCGAGTTCTAAGAGACGGCTTAGCAGAAGTCGCTCAAAGACTTTTGAGAGCGTCGGCA  
GAAGGCTTATAGGGCGGTAGGACTCAAGTTGAGTTAGCGGCTTACCGGGTGTGGCGATCATCACAATTTT  
CGCATGTTTCCATTGCTTCGGAAAGTGGCCAAGGCGGAGCATGGAGTTGAAAATTGTGGCGAGCGCCATG  
ACTCCTTTGCGTGAGGAGCCTTAGCTGCTCTGTTGTGATTTTCGTGCGATCCTGGGGTCTTCTTTAGCTCA  
AGCATTTTTCAGCTGTGTCCCGATTTCCGCGGGGGAGATGCTTCTTATCGGGAGAGCCATCTGCAGTGGAGC  
GTCCAGTGACTCGGCTACTTTACGGCGCTGTGCAACATCTGCGAAGTCGAATGGCTTGAAGGTTGTCTCCA  
AGTAGTCAGCAAACGCGTTGGCCTTTTCCTCGTCCGATCGGAGCCAGAGGCCAGAGTGGTCCGTGATCGG  
GGAGGTAAAACTGGTTGCCTCTTAATGCTTCTGGTGAGCTTCCACACTGAAAAGGTGCTGTTGCCGTCAT  
GCCCAGTTGTTTCGAGGAGGCTGTCTAGATTTTCCGTTTCGAGTCCTAGCCAGCAGTCGTCTGAGCCGGTTG  
GACGCGCTTACCATTCTGCCTTGGTAGAGGGGTCTCCGTTGCGGATGTACAGCCTCCTTAGACGTCCTTT  
TGTCGGCAAGGAGACTCCTGGCTTCCAGGGCTTAGTAAGGGGAACCTTCTGAAGGTACGAGAGTGAGGCA  
GGGTTTGCGGGGCTGCACGTCTAGCAGCTTCCGTAATTTTCGTGTGAGGTGGTCAACGTAGCTCTCCAGT  
TCACTTGCCGTATTTATGGTGACGTTGAGCTCTAAATGTGTCTCGAGGCAGGCCCGGTATAACTCCCAAG  
TTAGAGCGCGGGGAGCATTTTGCGGATTCCAACCTTCCCACTTGGGAGTCTCCTCGAGCTCAATCAGTAA  
TGGGAGGTGATCCGACGTCAGGTCAAGGAGGCTTCGTATTCGCAGCTGTTCTGTCTGAATCCCTTATAGA  
GCCCCAAGTCAAGTGCACCTTGGTGTTGCAGTAGCCCTATATGGGTAGCACGTTGCCTCTCCAGTGGCTATG  
ACTTCGATGCCTTCATTCTCAATGGCAGAGAAGAGCGTTCTCCCTCGGGGGCACATGCGGTAGTTTCCCA  
CCAGCGATGTTTGGCATTCAGTCTCCTCCTGCCAGGAATTTGGGGCCAAGCTGGTCGAAAAGGGCTCGA  
AAGTGTGCCTCAGTCACTCTCAAGGCCGGAGGGCAGTATACAGAGGCGAGATTGAAGTCGCCTCTGCTGG  
ATCCGAGTCGGATAACAGCAGCTTGCATATGCCAGTGGCAGGATGACTCAAGTGAGTGGTGCACAAAGG  
ACGACCTGATCAATATTGCTGCTCCTCCATGTTGGCTGTTGTCTGGGTGGTGGCGGTGTGGAGAGTGTAG  
CCTGGCACTCTGAGGGTGATTTCGAGAGCAGAAAGTGAGTCTCCGTGAGCAGAAACACATCGATGTGGTGGA  
GTTTCGATGAAGGCTGTGATCTCATTGCTTTGAAAAGACTCCGTTGGCGTTCCATAGTGCTATCCTGAGG  
GAGCTCATTTTAGGCACTGTTATTTTGGCGCTAGTGTGCATTAGCGCTTGTAAGAGAGTCTGTATGAGAG  
ACATCAGTTGGTTCGAATCTGGCGAACATTTGCTTCATCATGAGCTCAAGGGCTGAGTTGGGGCAGTTGTCTG  
GCAACAGGTTGCGATTGGCTGGGAGTACTGCCAGTGTTCCTTCTGCGAGACGATGAGCGGGGCACTGCGCT  
CTGCGGGGCTGGGTACCGCGGAGGACGCTGGCAAAGGATTGTTGGCCGGGCACGAAGCTGCAGGCAGGAG  
CGGCTGTTTTGGGGCGGGGATCTCTGGAGCGGCTTGCATCTCTGCCATTTGCCTTGTGCTGGTTTTTCTGCT  
GGAAAGCATATTGCAGGTACTTCTTGACGCCTTTGAAGTTTGCTGCGTGTGCTTCTCCACAGTGGTGACAA  
CACCGATTCTCGTCCTTGCCAAGTGTGCACTCGTTGCTTGGATGGTTGTCCCCACACTCCTTGCACACATA  
GTGTCTCGAGCAGTAAGATTTTGTGTGCCCGTACTCTTGGCATCTGTTGCATTGTACAGGGCCCCGACGCT  
TGCGAGGCTTCTCCCACGAAACTTTGTGCCTGCATAGTACTGTTATTGATTGACAAGGTTATTGTTCTCCG  
CTTTCCTCAGGTCAACAATTCTCATATTTAGAGGTTTCGTTATTGACTCTGCTACGCGGGGTATATATGCGG  
ACAACGTGGTGCCCTTTTCTGCCAATTGCGCTGAAATATCTTCGGATGCCGACCTCGTGGTGGATATTT  
GTAGAACTATGCGGTACGGCCGGTCTTCTGCAAGCTGGTGGTGGTGAACAGGCAGCCGTTCTCGCGAAG  
GTGCCTTGCCAGCGTTCCGTATTCGTCTGAGTTGCGGCATTGGACGATGCAGTCGCCAGAATTAAGCGATC  
TGACGGTGTAAGTGTCCGCGCCTAGGACGCTGTCTAGTTTCTTGCAAGAACTTGGTGAAACTGAGGACGTTT  
GGCACAGTTATTCTCGGCACCTTAGAGGCAGGCCGCTCATTGGGAGGCGCCGTCTGGGTGGGTGGCGGGT  
GTGCGGCAAGCTTTTTATTTGCCGTTTGTGCTGCTGGCCCTTGCGCGAGCTGCGTGCGAGGTGGATGGC  
CTATCATCTACATCCTCGTCGGCGCAAGCTTCCTTGTGGTGGCTAGCTCTACTTCCGTGTCCATGTGCTT  
TCCTCTTCGTACAGAGGGGCCGCAAACCGGTTTTGGCTGGCTTCTTGGTTTCGGTGGTGCTCGCCTTCTTA  
CGGACGATATGGGGGGAGAGATTGCCACCTTCTCTTTTAGTGCCCTTAAACCATTGACCTTGCCAAGTACG

TGAAGTCTTGGGCGGGTAATTATTCAAAAACGCGTGGAGATCCGGGGCTTGTAGCAGGATTTCGCGCCAGGA  
ATGGACGGGATTGCGGGGCCTTGGGAGCTGATGCCATGTGCGAGGGACGACGTTACCGTAGTCGTTCTTA  
GGGAGCAGGCAGTTGTGGTGATGCACGACGTGGTGAGTAGCGTAGTACCCCGGCACAGCGTGATGTATG  
GCGGTAGCACATTATCCGACGGGTGTATATAGGTGACGCAGGATAGTCGGGGATGAGTGGATTTCGGCTT  
GTTGGACGCCATTAGGTGAGATGTAGACCAAAATTTACTAGCTGCACTTATTTACAAAAATCTCCAGTATT  
TTTGTGAAAAGTGACTTTGGTGAACGGGGAGCGAAACGGTGACTGGAAAGTGTCAGCACTGTCACGGTCA  
GTGACTGACTTGCCAGCACTGATTGTTCTCCTATTGGCTAGTGCTTTACTTGTGTTAGTGAGTCTAGGCAA  
AAGCTCTCTCGCGAAAGCTCTGCTCACTCACACGCACACACACACTACAGCTGAGTTAAGGCGATCAG  
CTGAGCGCAGTTTGAGCTTAGCAAAAGCTTGCTCTCTTACGCTCGCACGCGGTTGCACTTTTGTGTAAAAA  
AAAAAAAATTTAAATGTTTATATATGTTTATATATATATATAGTTTAGCTGCCAGAGGCAGCACAAATTGTT  
TTTTTTCGCGCTCTGCAGGCGCGATTGTTTGTAAAGCCCTGGGGCGGGCTTAGTTAGTGTCCTGTCCTT  
TTTGTGTTGTTTTTGCCTGGGATGCACTGAACATACACACGCACGGGAATGCACAGAAAACACGACCGAT  
CTCCGCGGAAGTTCAAGGCGA  
>9\_rnd-1\_family-359\_\_LINE\_\_R1  
AAACACACACACACACAGCCGTGTGGCAAGCGGCCACAGAATACTACCACAGCTTGTCATTGCTTGTCG  
TACGAGGCGACTGAAATGATACGGGGATGTAATTGCTCGGAGAGGTCCCTCTAGTAGGCGAAAAGATTCT  
GACTGCCATTAACCTGGCAATGGCCAGATCGATTCCGTTCCCTGGGCAATTAAGCAACTCGTGACCTCCG  
GCAGTGGCCAGGTATCCCCTGGGTAGGCGCTGCACACCCGTGACGCGCCTAGCTAATACGAGAAGGCGAC  
TAAGACTGAGACCAGTAACGTCTTAGGTTGCAAACTCTGGACAACCCTACACGACAAGACGACCCCTGGG  
CTGACGGCTGACAGTATTCTAGCATCTCAGTAAGCGGAGTGAAATCTGGCCGAAATGACTGCTAGGTTAA  
TGCTGTTACCGCCCCCGTCCCGTTAAAACATGGCAAATCTCCTAGCACGCTCCTCGAATCGTCGCCATTTA  
GTTGGCAGTATAGGTTTCAAGATGTGATATTCCTGATTAACGCGGATCTGGCTCTGAACACTCGACCCCATGA  
AGGCGGGTGTCAACCCTCGCATGGCCTCACTGCTTGCAAAGACAACCATGAGATCTAAACGCGACTGTAC  
AACGACCAAGGACAACGGCTTAGGAGTTGGGACCCAATAAAATGAGTACCAATGAAACCCCACAAATGA  
AGGAGAGCTGCGATGCTTTTGCAAAGAGCAGCAGAATGGCGAGATCACCCTAGGTGTTCCAACAGCCGC  
CCCGACAGAGACGAACTCAGGACGGGAGCCAACGACGGCAAACCAGAGCAGCTCAGCACTACGAGA  
CGGGCAGGAGATCTCAAAGCTGGTAGTCATGCTCGAAGATGGCAAGCGACGCTCCATCCACCAGCCAATG  
CGAGACTCGATAGAGAGCATCAGAGTGCTCTACGAGCTGGCGGCAATCCAGCTGCACGACGAAGGAGCC  
AAGGAGATCATCAGGACGCACCAGTCGTCCTCCAAACATCGCCATTGTTTCAAGGACGACGATAGACGTCAAGC  
GGAAGCAAGCCACAGCACGACACCAACAAACGAATCCGAGGACCAGCCGGTAGCCAGGCTACCG  
TATCAACGGCGCAGGAGACACCGAGCCCCAAAGCGGATGGCGACAAGTGGAAGGAGGTCACNTACAAGA  
AAAGGAAGGAGGTCACCAGGAAAAACAGCAAGGGATTGCTCAAGGAAAAGGCGCGACCGGATGCTATA  
GTCATCTCGGCAAAAGGCGAAGCGAGCTACTCAGAGATACTGAGGAAAGTTAAAGCGGACGAAAAACTG  
GGCGAGCTCGGAAAAGCGGTGACAAGGATAAGGAGGACACAAAAAGGAGACCTACTNCTCCAGCTTAAC  
CACTCGGGAGAGAATAACCATAGCATTTGGAAACCTGGTAGGCGAAACGTTAGGCGAAAATGCAGAGGTC  
CGGACGCTGTCCACCGAGTGACCGTTGAGTGCAAGGACCTGGACGAGATCACGACCAGGGAGGATATCT  
GTGAGGCGCTGAGGGGTCAAATCCAAATACTGGACATAGCCCCTGAGAATATCAGCCTCCGAAAGGCGTA  
CGGCCAAACACAGACGGCGACGATAAGACTGCCAGCGGGAAGCGCGAAAAAGGCCCTTTCAGTAGGTTT  
CCTGAAAGTAGGCTGGGTAACTCGAGAATCCGCGAACGGATNAACATCACCAGATGTTTCAGATGCCTC  
GAGTTTGGACATCTAGCAAGACACTGCAAAAGTGATCTAGACAGATCGAATCTGTGCCGACGATGCGGAG  
GAAAGGACCATCTGGCTAAGGACTGCAAAACAAGAGCCACAGTGATGCTCTGTAAGGAAAGGAATGCCG  
ACTGCAAAACACATTGCCGGCAGCGGCAGATGCCCCGTGTTTAGGAGCGCCCTGGCCAACAGAAAATGAA  
GTGGACACAGCTGAACCTCAACCACTGCGAGGCTGCTCAGGCCCTGCTGACACAATCAATACGGGAGAGA  
AATACGGACGTCGCAATAATCTGCGAGCCATAAAGCCTATCGCTGGAAGTGCTGGGTGGCAAGTAAAT  
GTGGAAGGCGGCCATTTGGTCTCTCAAATCACCGGTCCAGGAGGTCAGAGCAGCAAACGACGGATTTCG  
GAGAGCAAAAATTAATGGAATCACCGTTTACAGTTGCTACGCACCCCCAAGCTGGGAAGTGCAGCAATTT  
CAGACCATGCTGGAAGAAATATCAGAAGACGCTCGCAATAGAGCTCCTCTCGTCATAGCCGGAGACTTTA  
ACGCCTGGGCGCGTGAATGGGGAAGCAAGGAACTAACGCGAGAGGGACCACCCTGCTAGAAGAGTTTCG  
CGGCGCTCGACTTGGGCCTTGCAAACGACGGGCAGGAGCTCACGTACTGCAAGGCCGGTAGAGGCTCTAT  
TATAGACCTTACCCTGCTCAGCAGCTCACTTTATAGGCTAACTACATGGAAAGTCAGTAATGAATTCACAT  
TCAGCGACCAACCGAGCAGTGCAATTCGAGATCCACGGGAGAGGACGGAGAAAACAGCAGCCCAAAACAA  
CAGGCCCAAAATGGAAGGACAACGGCCTAGACGAGGAAACCTACACGGACTCCTTACGTCATGCTCAATG  
GACTTGGGCCACGGAGTTAGCAGACGACATGGCGCGGCAGCTCATGGGAAACATCTCGGACGCGTGCGA  
CTTATCCATGCCAGGAGGATGCCAAACAGAAGAGGAGCACCTTGCTACTGGTGGAATGAGCAAATCAGC

GACCTAAGGAAGGCCTGCCTGCGTGCTAGAAAGGCGCTCTCAGCGTGCCCCGAGGCCACCCAGACTTTGTCAT  
CTAGGCTGGAACCTCCTGCGGGCAGCCAAGCGAGACCTCAAGAGAAGCATTAAACGAAGCAAATCCAGCT  
GCTTCCAGAAAATATGCGATGAGGCCGATGTTAACCCGTGGGGCACGGCATAACAAGGTCGTCACGAAGA  
AGATCCGCAGCCAGGGAACAACCCAGGTGACCTGCCCTACCGCACTTGCCACTATAGTTGAGACACTGTT  
CCCCAACACCCACGACTGGAAGTAGCCAACCGCTCACTGAGCACGGAGCTAGTGCAGCAGGTGTCGGCA  
GACGACGTGTTAGCGGCAAGCAAAAAACTAGGGCGACAAAAAGGCTCCAGGACCAGATGGGGTGCCAAAC  
AAGGCGCTAAAGTTAGCAATGCTAACGAAACCCGACGCCTTCGCCGAGACATATACTAGATGTCTACAGG  
ACGGTGTATTCCCTAAGAGATGGAAGCGACAGAACTAATCCTTCTACCGAAAGGGGAACAAGCCAATA  
GAGGAACCCTCGGGATACAGGCCAATCTGCCTACTGGACACGGCGGGAAAGGTACTGGAAAGGATTGTG  
TATGACCGACTACTTAGTGTCTCGTCGAAGAGAAAGAGGCCCTGTCCAAACAGCAATACGGATTTTCGCAAGG  
CAAGGTCTACGGTCGATGCAATTAAGGCGGTGGTAGATATTGCCGCTAAAGCAATAGAGGGGAACCAGAT  
GGAGGTGGGGAGACAAGGAGTATTGCGCGGTGATTACGTTGGACATCCGCAATGCCTTTAACTCAGCAAG  
CTGGTCTCGTATACTGGAAGCCTTAGACCGAATAGGGATACCGTCCTCCCTTTTCCGTATAATATCCAAC  
ACCTGTCCGATCGGGTATTGAGTTATGATACGGATGACGGTGCTAGGAGTTACACGGTCTCAGCAGGGGT  
CCCACAGGGGTCTGGTCCTGGGACCACTCCTGTGGAACATAATGTACGACGAGGTGCTCAGAGTGCAATTG  
CCCAGGGATGCAGAATCATAGGATTCGCGGATGACCTAGCTCTAGTAGTGGTGGGCAAAGAAATAGAA  
GACGTGGAAGCGGCTGCGAATGCAGCCATAAGGATCGTGGCCAGCTGGATGCGTGGCGCTAGCCTGGAG  
CTGGCAGGCCATAAAACAGAGGCGGTGCTCATCACAAGCCGCAAAATAGTCGAGTTTGCTAGATTTTCAGG  
TAGACAGCGTTAGTATCGAGTCAAAGGCTTCCATTAAGTATCTGGGGGTCATGTTAGACAACAGGCTTAG  
CTTTCGACCGCACGTAGATTACGTTAGCCAGAAAGCAGCCAAAATGCAGGCGGCCCTTTCGAGGATGCTA  
CCCAACATAGGAGGACCTAAAGCAGGTAGACGCCTGCTCCTCGCGAGAGTTGTAGCCTCCGTGCTGCTCT  
ATGCTGCACCGATATGGGCTTCAGCGGTTGCAAGCCAGAAAGGCCTCCGAAGGAAGATGTCAATCCCCTA  
TAGGCTCAGTGCTCTGCGCACCATTTCTGGATTCCGGACGGTGTCGGACGAGGCAGCCACAGTATTGGCA  
GGAATGCTGCCAGTAGATATACTGGCCAAGGAAATGGAGAAAATTTACATGGCCCCGAATAGCCACGGGA  
GACGCCGTCTCAATGGACGTATCCGGTTCGGAGAGAGCAACATCAATGGCAACTTGGCAGGAGAGATGG  
AACACGGCGAACAAGGGGAGATGGACACATAAACTGATCCCCAATCTGGAGCAATGGATTAGGAGACGG  
AATGGCGAAATGAACTTCCACCTAACACAGTTTTTCACTGGACACGGCGGGTATAGGAAGTATCTCCATA  
GGTTCAGGCATGAGGACTCTCCAGAGTGCCCCGAAGTGCCTGAGCAAGACCCGGAACACGTGCT  
GTACCAATGCTCGAGGTACAGAGAGGTAGTGGGCTCTGTACCTCCACCGGAGGGACTGGTAGCGTTCATG  
CTGGAAGGAGAGGACAAGTGGAGAAATATAAGCCAGCTCATAATAGGCATCCAGAGGGATCTGAGACGA  
TGCGAAAAGGAGCGACGACTAATGGATACTGCCTAAAATAGGCAACCCATCCCCGCGAAGTAATACTTTG  
CGGTGATCCCGCGGGGAATGTGGTGTGTGAGTGGGGGGTGAGTTTAGTACGTAGGTGCTGACGGAGTCAG  
CAAATCGTGCATACGTTGGCCCCGGGCCATCAGTATCTTACGAAGATTTTCACCTCCGTGCCGTAAGCAAA  
AAANACACACACACACACG

>9\_rnd-5\_family-539\_\_LINE\_\_R1

ACACACACACACACAGCCGTGTGGCAAGCGGCCACAGAATACTACCACAGCTTGTCATTGCTTGTCGTA  
CGAGGCGACTGAAATGATACGGGGATGTAATTGCTCGGAGAGGTCCCTCTAGTAGGCGAAAAGATTCTGA  
CTGCCATTAACCTGGCAATGGCCAGATCGATTCCGTTCTTGGGCAATTAAGCAACTCGTGACCTCCGGCA  
GTGGCCAGGTATCCCCTGGGTAGGCGCTGCACACCCGTGACGCGCCTAGCTAATACGAGAAGGCGACTAA  
GACTGAGACCAGTAACGTCTTAGGTTGCAAACTCTGGACAACCTACACGACAAGACGACCCCTGGGCTG  
ACGGCTGACAGTATTCTAGCATCTCAGTAAGCGGAGTGAAATCTGGCCGAAATGACTGCTAGGTTAATGC  
TGTTACCGCCCCCGTCCCCTTAAACATGGCAATCTCCTAGCACGCTCCTCGAATCGTCGCCATTTAGTT  
GGCAGTATAGGTTGAGATGTGATATTCCTGATTAACGCGGATCTGGCTCTGAACACCCGACCCCATGAAG  
GCGGGTGTCAACCCTCGCATGGCCTCACTGCTTGCAAAGACAACCATGAGATCTAAACGCGACTGTACAA  
CGACCAAGGACAACGGCTTAGGAGTTGGGACCCAATAAAATGAGTACCAATGAAACCCCAACAATGAAG  
GAGAGCTGTGATGCTTTTGCAAAGAGCAGCAGAATGGCGAGATCACCCTAGGTGTTCCAACAGCCGCCC  
CGACAGAGACGAACTCAGGACGGGAGCCAACGACGGCAAACAGAGCAGCTCAGCACTACGAGAACTCG  
GGCAGGAGATCTCAAAGCTGGTAGTCATGCTCGAAGATGGCAAGCGACGCTCCATCCACCAGCCAATGCG  
AGACTCGATAGAGAGCATCAGAGTGCTCTACGAGCTGGCGGCAATCCAGCTGCACGACGAAGGAGCCAA  
GGAGATCATCAGGACGCACCAGTCGTCCCAACATCGCCATTGTTTCAGGACGACGATAGACGTCAAGCGG  
AAGCAAGCCACAGCACGGACACCACAAAACGAATCCGAGGACCAGCCGGTAGCCAGGCTACCGTA  
TCAACGGCGCAGGAGACACCGAGCCCCAAAGCGGATGGCGACAAGTGGAAGGAGGTCACATACAAGAA  
AAGGAAGGAGGTCACCAGGAAAAACAGCAAGGGATTGCTCAAGGAAAAGGCGCGACCGGATGCTATAGT  
CATCTCGGCAAAAGGCGAAGCGAGCTACTCAGAGATACTGAGGAAAGTTAAAGCGGACGAAAAACTGGG

CGAGCTCGGAAAAGCGGTGACAAGGATAAGGAGGACACAAAAAGGAGACCTACTACTCCAGCTTAACCA  
CTCGGGAGAGAATACCATAGCATTTGGAAACCTGGTAGGCGAAACGTTAGGCGAAAATGCAGAGGTCCG  
GACGCTGTCCCACCGAGTGACCGTTGAGTGCAAGGACCTGGACGAGATCACGACCAGAGAGGATATCTGT  
GAGGCGCTGAGGGGTCAAATCCAAATACTGGACATAGCCCCTGAGAATATCAGCCTCCGAAAGGCGTAC  
GGCCAAACACAGACGGCGACGATAAGACTGCCAGCGGGAAGCGCGAAAAAGGCCCTTTCAGTAGGTTTC  
CTGAAAGTAGGCTGGGTCAACTCGAGAATCCGCGAACGGATAAACATCACCAGATGTTTCAGATGCCTCG  
AGTTTGGACATCTAGCAAGACACTGCAAAAGTGATCTAGACAGATCGAATCTGTGCCGACGATGCGGAGG  
AAAGGACCATCTGGCTAAGGACTGCAAAACAAGAGCCACAGTGCATGCTCTGTAAGGAAAGGAATGCCGA  
CTGCAAACACATTGCCGGCAGCGGCAGATGCCCCGTGTTTAGGAGCGCCCTGGCCAAACAGAAAATGAAGT  
GGACACAGCTGAACCTCAACCACTGCGAGGCTGCTCAGGCCCTGCTGACACAATCAATACGGGAGAGAA  
ATACGGACGTCGCAATAATCTGCGAGCCATACAAGCCTATCGCTGGAAGTGGCTGGGTGGCAAGTAAATG  
TGAAAAGCGGCCATTTGGTCTCTCAAATCACCGGTCCAGGAGGTGAGAGCAGCAAACGACGGATTTCGTG  
AGAGCAAAAATTAATGGAATCACCGTTTACAGTTGCTACGCACCCCAAGCTGGGAACTGCGGCAATTTCA  
GACCATGCTGGAAGAAATATCAGAAGACGCTCGCAATAGAGCTCCTCTCGTCATAGCCGGAGACTTTAAC  
GCCTGGGCCGTGGAATGGGGAAGCAAGGAACTAACGCGAGAGGGACCACCCTGCTAGAAGAGTTTCGCG  
GCGCTCGACTTGGGCCTTGCAAACGACGGGCAGGAGCTCACGTACTGCAAGGCCGGTAGAGGCTCTATTA  
TAGACCTTACCCTGCTCAGCAGCTCACTTTATAGGCTAACTACATGGAAAGTCAGTAATGAATTCACATTC  
AGCGACCACCGAGCAGTGCATTTTCGAGATCCACGGGAGAGGACGGAGAAAACAGCAGCCCAAACAACA  
GGGCCCAAATGGAAGGACAACGGCCTAGACGAGGAAACCTACACGGACTCCTTACGTCATGCTCAATG  
GACTTGGGCCACGGAGTTAGCAGACGACATGGCGCGGCAGCTCATGGGAAACATCTCGGACGCGTGCGA  
CTTATCCATGCCCAGGAGGATGCCAAACAGAAGAGGAGCACCTTGCTACTGGTGGAATGAGCAAATCAGC  
GACCTAAGGAAGGCCTGCCTGCGTGCTAGAAGGCGCTCTCAGCGTGCCCGAGGCCACCCAGACTTTGCAT  
CTAGGCTGGAACNCCTGCGGGCAGCCAAGCGAGACCTCAAGAGAAGCATTAAACGAAGCAAATCCAGCT  
GCTTCCAGAAAATATGCGATGAGGCCGATGTTAACCCGTGGGGCACGGCATAACAAGGTCGTCACGAAGA  
AGATCCGCAGCCAGGGAACAACCCAGGTGACCTGCCCTACCGCACTTGCCACTATAGTTGAGACACTGTT  
CCCCAACACCCACGACTGGAAGTAGCCAACCGCTCACTGAGCACGGAGCTAGTGCAGCAGGTGTGCGCA  
GACGACGTGTTAGCGGCAAGCAAAAAGGCTCCAGGACCAGATGGGGTGCCAAACAA  
GGCGCTAAAGTTAGCAATGCTAACGAAACCCGACGCCTTCGCCGAGACATATACTAGATGTCTACAGGAC  
GGTGTATTCCCTAAGAGATGGAAGCGACAGAACTAATCCTTCTACCGAAAGGGGACAAGCCAATAGAG  
GAACCCTCGGGATACAGGCCAATCTGCCTACTGGACACGGCGGGAAAGGTACTGGAAAGGATTGTGTATG  
ACCGACTACTTAGTGTCGTCGAAGAGAAAGAGGCCCTGTCCAAACAGCAATACGGATTTTCGCAAGGCAAG  
GTCTACGGTCGATGCAATTAAGGCGGTGGTAGATATTGCCGCTAAAGCAATAGAGGGAACCAGATGGAG  
GTGGGGAGACAAGGAGTATTGCGCGGTGATTACGTTGGACATCCGCAATGCCTTTAACTCAGCAAGCTGG  
TCTCGTATACTGGAAGCCTTAGACCGAATAGGGATACCGTCCTCCCTTTTCCGTATAATATCCAACCTACCT  
GTCCGATCGGGTATTGAGTTATGATACGGATGACGGTGCTAGGAGTTACACGGTCTCAGCAGGGGTCCCA  
CAGGGGTGCGTCTGGGACCACTCCTGTGGAACATAATGTACGACGAGGTGCTCAGAGTGCAATTGCCCC  
AGGGATGCAGAATCATAGGATTCGCGGATGACCTAGCTCTAGTAGTGGTGGGCAAAGAAATAGAAGACG  
TGGAAGCGGCTGCGAATGCAGCCATAAGGATCGTGGCCAGCTGGATGCGTGGCGCTAGCCTGGAGCTGGC  
AGGCCATAAAACAGAGGCGGTGCTCATCACAAGCCGCAAAATAGTCGAGTTTGCTAGATTTTCAGGTAGAC  
AGCGTTAGTATCGAGTCAAAGGCTTCCATTAAGTATCTGGGGGTGTCATGTTAGACAACAGGCTTAGCTTTTCG  
ACCGCACGTAGATTACGTTAGCCAGAAAGCAGCCAAAATGCAGGCGGCCCTTTCGAGGATGCTACCCAAC  
ATAGGAGGACCTAAAGCAGGTAGACGCCTGCTCCTCGCGAGAGTTGTAGCCTCCGTGCTGCTCTATGCTG  
CACCGATATGGGCTTCAGCGGTTGCAAGCCAGAAAGGCCTCCGAAGGAAGATGTCAATCCCCTATAGGCT  
CAGTGCTCTGCGCACCATTTCTGGATTCCGGACGGTGTCGGACGAGGCAGCCACAGTATTGGCAGGAATG  
CTGCCAGTAGATATACTGGCCAAGGAAATGGAGAAAATTTACATGGCCCCGAATAGCCACGGGAGACGCC  
GTCTCAATGGACGTCATCCGGTCGGAGAGAGCAACATCAATGGCAACTTGGCAGGAGAGATGGAACACG  
GCGAACAAGGGGAGATGGACACATAAACTGATCCCCAATCTGGAGCAATGGATTAGGAGACGGAATGGC  
GAAATGAACTTCCACCTAACACAGTTTTTTCACTGGACACGGCGGGTATAGGAAGTATCTCCATAGGTTCA  
GGCATGAGGACTCTCCAGAGTGCCCCGAACCTGCCCAAATCTGGACGAAGACCCGGAACACGTGCTGTACCA  
ATGCTCGAGGTACAGAGAGGTAGTGGGCTCTGTACCTCCACCGGAGGGACTGGTAGCGTTCATGCTGGAA  
GGAGAGGACAAGTGGAGAAATATAAGCCAGCTCATAATAGGCATCCAGAGGGATCTGAGACGATGCGAA  
AAGGAGCGACGACTAATGGATACTGCCTAAAATAGGCAACCCATCCCCGCGAAGTAATACTTTGCGGTGA  
TCCCCGCGGGGAATGTGGTGTGTGAGTGGGGGGTGAGTTTAGTACGTAGGTGCTGACGGAGTCAGCAAATC  
GNGCATACGGTTGGCCCGGGCCATCAGTATCTTACGAAGATTTTCACCTCCGTGCCGTAAGCAAAAAAAA



AAAACACACACACACACAC  
>160\_rnd-1\_family-363\_\_LINE\_\_I-Jockey  
GAGTCGCTAATCTGCTCTCATCGAGATCGGTTGTGCCGCGCATAGACAAAGTACGAGTTGATCAATTGTGC  
AATCTACGTGTGCTAAAAATAGCACAAATCGAACATTTTCGGACGCTGTCTTGTGCAGTGTGGCAGTTTGA  
CAACAACAAAACGCAAGTGTAGTGCAGATAAGACTGCATTCGTTGCCCCGTTTGGGCAAAACATTACCCCTC  
TCTCCGCGCGCAGCCGCACAAGAGGGGGCAATAAACGCGGTGCTTATCAGCTAAGTTATCTTTTTATAAGCT  
TAACTTTAACTTTAAAAATTAACAAATATAAACTAATTTAATATGGACAAGAACGTTTTTTCTAACTCTCAG  
CTTAGTAATAAGCCGATTGATTATGGAAAAATGCGCCAAGTAGCTGGCAAATCACCATTGGAAATCAGGA  
CAGATTTTATTAATAGCCTGTTACGTACTGATACACAGAGCATCAGCACAATAACAACAACCTTTAACATTC  
ACCAGTGCCACTAGTAATTCTATTTACACCACGGCAACTGCTGCAACCAGCAGTGTGAGCCATTGCGGAA  
GCATGGATAACCATGCAGCTAGCTTTACCCAATGCTCCTCTGACTCTACCTCTCCAACAATCAGTGGAGCT  
TCTAAACTAGACTCCTTAGTTCTTAGTGAAGCTGCTACAAAATTAGTGGCTGCCCAAAAGAATTTGAAAA  
ATAAGAGGAAGAAACCATTATCTCCCAATACTAGCTCTAAGAGGGCCGAATAAAGATTTGTGCTAGTCTC  
GCCCTCAGCATCAACAAGTATGGCAATCTCGGGCAACAGGTTTGCCTTGCTAGACATGGACATGGACATT  
GATGTAACAAACGAAAGCCATGTTGAAAGCCACAGAACTCCAAATGAAAGCCCTACTAGCACTTCTGAGG  
CTGATCAGCAGAACAATACTAACGTCAGTATTGATGTAAGTGTACAGCCAACAACCCACAACATAATGC  
AACCAATATCAACGACCAGCTTCACGGTACCCGAAAGCCACCGCAAATAGTTGTGAGTGTACTGACCTT  
AATGATCTTTTTGAACTCATTATGGAGGTCAGTTTAGACAACGTGGCAGTGAAAGTCAACCAAGGAG  
AAACGGCCAGAATATTTCCCAAAGACAGTGACACTTACAGAGCAATTGTCAATCATTTTGATGGTATTGG  
TATTGAGTTCCATACCTATCAATTGAAGGAAGAGAAACCATACAGGATAGTAGTTAAGGGGCTTCACCAT  
AGCACATTAACAACGAAATTATTGAGAATTTTAAACAAAATGGCTTTGATGCTCTGCAGGTTTCATAACC  
CAAGACCAAGGAGTAACAATGATGGAAAACTCAATATATTTTTTCATAAATATAAGGCCATGCGCAAAAAT  
TAATGATATATATGATATCAAACTCTTTGCCGACAAAAAGTGAGGATAGAGAGGATGCGCAAAGCATCT  
GAAATCGCCCAATGCACACGATGTCAGGAATACGGACACACAGCCAAATACTGCCGTCGTCACCCCAATT  
GTGCACGATGTGGTGAAGATCATCTCACGAAGCTATGCACACGTCCCCATGATGAACAGCCTTCCTGTTTG  
CACTGTGGAGGGAATCATATGGCAAGCTACAAAGGTTGCCAATGGTACCAGGACTATCTACGACGATCAA  
TGGGCTCTACAATGAAGCAACAGGCTCACACGCAACCGTCTAGACAGATCAGGAGGAATCAAGATCAAC  
CAAAGCAGAAACAACCACAAAGGAAACAGCAGCAGCAGCAACCAACTCGACAGCAACAAATTCCTAACA  
TCCCTAGAGTCAATACTGGAGGCAAGTCCTATGCCTCAATAGCAAGGAACGCCAACGAACCTGCCAGCG  
CCGTCTACATGGTTTGCAAGCGCAACATCAGCTACCAAAGCCAATAGAAAATATCAGGCAGCAGCAGCAT  
CCAGCTGACGTTCAATCACTATTGGAACAACAGCAACAGCAATTTCTGAAATGGCAACAACAGCTGCAAC  
TACAGCAGCAGCAGCAATTCCTCTTGTGGCTGCAGGAGCAGCAACGGGAACAACAACAACAAAACAAGC  
AAAATAGTCAACGACTAGAACGGCTTGAAAAAATGGTCCACGAAATGGCCAGCATGTTAAAGCAATGGA  
CAGGGGATGGATCGACTCCCCAGCTTCATAACAACGCCACAGCCTCCCAATGAATCCACTCAAGATCCTT  
ATCTGGAATGTTAATGGCATCGCAGGAAAAGCCAGTGAAAGTTGAGCTCTTCGCGCACAAACAACAATGTCG  
ACATTCTCCTTCTAAGTGAGATCAGACTAAACCGAGGACAAACAGTCAAAATACATGGGTACACCTTCTA  
TCCAGCTTACAAGCCATCACGTCATAATCACGGTGTGCGAGGAGCGGCGGTATTCGTGAGGAGTTCTCTC  
CGCCATTTTCCACAAAGAGTAATTGAAACGAGCACTATACAAATGTCTTCAATAAAAGTTGCCACTGGTTT  
GGGAGACATGGAATTTAGCGCCATATACTGCCACCAAGAAATAGAATTGAAGAAAGGCATTTCAAGTGAC  
ATACTCGCTTCTTGCGGCCAAAGGTATCTGGTTGGTGGAGACTGGAATGCGCGACATTGGCTGTGGGGAG  
ATACCTACAATTCACCCAGGGGCGGAGAACTAGCCGAAGCCATTACAGCCAGAGGAGCTAATATTCTCGC  
AACAGGATCACCAACTAGGTACCCATATGTGCCTAGTCACACACCTAGTTGCATTGATTTCGCATTATACC  
ATGGGATACCGGATTCTCAAACAAATATCGGCCAAAGCTGGGATCTAGACTCTGACCATATAGCCCTTGT  
TGTAATTTGCAAACCTGATGGTTCTTATGTCAGGCCAAACCCTCGATTAATTACCAACCGTACTGACATCA  
TGGCTTTCAGACAACATCTTGAATGCTCGATTCAATTAAATCCCACCTTGGACTCTGGAGTAGACATTGAG  
AATGCAGTAGATTTTCTAACTGAAAATATACATAGCGCTGCTACTGCCACAACCTCCACCCAACACCGAGT  
CACGCCCCATTCGTTATGGCATTGTTCTCACGAGGGAGGCTAAAGAGCTGATGAGAACAAGAGGTGCCT  
TCGAAGAAGAGCAATTCGATCACAAGATCCTTGGGACCGAATTTTGTGGAACCGAGCAGCAAAACAGCTA  
CGTATCCTCCTAAGGGAACCTCAGAAGTGATTTCTTCGAGCAAAAACCTGGCTTCCATGGACTACACCGTTGA  
TGCAAACTACTCTCTATGGAAATGTACAAAATCACTCAAACGACAACCCTTTAGACAGGTTCCCTGTCCGAT  
GTCCTGGTGGCGAACTTGCTAAAAACGAAAGGGAACAGGCTAATGCTTTCGGATATCATCTTGAGGAGCG  
TTTCACTCCTTATGAATTTGCTACGATAGAGCAGACCAGGGAGACCCATCAGACTCTTCAGACCCCCCTGC  
AGATGTCCCTGCCTATTGAGCCTATAAGGATTGAAGAAATAACTGACGCGATCCAGCTATTGCCGAAAAA  
TAAAGCTCCGGGTATCGATAGAATCTGTAATGCTACGCTGAAAGCCCTGCCTACAAGCGCGCTTCTGTATA

TAATGCTAATTTTTAACGCTATTATCCGGCTCCAAGTGTTCCCAAAGCAATGGAAACTAGCAGCAATTATG  
ATGATTCACAAGCCAGGCAAACCAGAAGCTGATCCTGAGTCGTATCGGCCAATAAGTCTCTTACCCTCCCT  
GTCTAAACTATGGGAGAGGACTATTGCCAAGCGGATAACTGCCATTACAAGCCAATGCAATATCTTGCCG  
GATCACCAATTCGGATTTTCGAGAGGGACACGGCACTGTGGAACAGGTCCACAGATTGGTGAAGCACATCA  
TGCAGGCTTTTGACGACCTAGAGTTCTCAAACGCTGTCTTCATTGACATGCAGCAAGCGTTTCGATAAGGTG  
TGGCACGATGGATTACTGTACAAAATAAAAAACCTTTTACCCGCACCGTACTATGGCCTTTTAAGGTCATA  
TCTGGAAGGACGCGAGTTCAAGGTCAAGGTAAGGGACACATACTCCTCCACCTATACTATGAGAGCAGGA  
GTGCCACAGGGCAGTGTTCTTGGTCCGCTGCTCTACTCGTTGTATACCTCAGATATACCCAGCCCTACCTC  
TCAACATATGGAAGATCCCTCTAAGGCTATCATTGCGACATATGCAGATGACATCGCAGTCATTTATAACT  
GCGAAAGTTGCGTAGAAGCTAGCAATGGACTTCAGGGGTATCTGGATACTCTCGCAGCTTGGTGCAAACG  
GTGGAAGTTGAAGGTTAACCCGTTAAAACTATTAACCCATGCTTCACCCCTCAAATGCGGATGCATATCC  
CTCCAATTCAGCTTGAAGGAGTTACCCTGGAGCAGCCGCCACAAGCTAAGTATCTCGGCATCACCTTAGA  
CAAGCGCCTTACCTTTGGGCCACACCTCAAAGCTACGGTAAAAAAATGTCGGCGCAGACTGCAACAAGT  
CGGTGGCTCAACAACAAAAGGAGCACCTGCCGCTGAGATGCAAAAGAGCTGTATATGTGCACTGTATTT  
TGCCGATATGGCTCTATGGAGTGCAGATTTGGGGGATTGCAGCCAAATCAAATTATAAACGCATACAGGT  
ACTGCAGAATCGGGTATTACGACAGATAACCAACTGTCCCTGGTACGTACGCGGTTCTACACTCCATAAA  
GACCTCAAAGTGCACACAGTCGAAGAACAGATTGGAAGGCACACAAGCAGATACAGCGACAGACTGCTG  
AGACACCGCAGCCTGCTCGCCAGAGGACTACTCCCTGCCCGACCTCTAAGGCGACTCAAACGGCAAGGTT  
TTGCCAAGACGATTGGGCGCCAGTAAGACCACCCGCATTAAATCCTCATACTACGTTATGGGGTTTCGGC  
TCTAAATAACATTTCTATCCATGTGTTGTTAAGGTAATAATTATGATTGTACAGGTTCTACACTTAATAA  
AAAAATAAAAAAAAAAAAAAAAAAAAAAAAAAAAAAAAAAAAAAAAAAAT

>Ref\_dvir\_442

GACACGAAAACAAGGCGACCCATCTCTTTTCTTTTCAACGTCCGATCGTCACAAGGAGTGGTTTAAGGTA  
GTCCAGATCCGTAAACTTAAATGGCCATCCCATTGGCCTCCAGTATGTTCTTCGGCAAAGGACCCATTATA  
GGTGGCGCTGGCTGCGCTCTGTGTAGCTTGCACACGCTACATCCAGAAATTACTGTACGCAACAGTCGAC  
GCAGCTTTGTTAAATCTTGGTGATGTCGCCTAATCCACGTTTTGATGCTTCATTTTCACATGGTAGTGATAC  
ACCATCAGTTCCGTCAGTGCCTGCCGGTGTGACAATATTATTGGCCTTCTCGCACTATGCGGTATACACAG  
TGCGGCATCGATCCTGCCATACGCACGCAAGACTCCATTGTCATCCAAGTATGGCGCCAGCCCTCTGTAGC  
TATGTGCTTCGATGACCGACTGAATTCTTCATTGTATGAGGCTCGGGCAACCTCGTCAGGGAACGCTTCG  
CATTGCGCTCGCCGTATCAGCAAGTTCTCAGCGTTCTCACACTCCGTGCGGGTGAGGCCGAATCTCTCAAG  
CTCAGTCCTCTGTCCACGGCTCCAGCGCGTGAACCTTAAAACCCAAGCCGTGCTCCTCACCAGCCGACTGT  
AGCTAGAGAATCTCTGAAATGAAATGTAAAAGCTATTTGCTGCAACTAAGGCAAATTCAGTCGGCATCTC  
TTCTTCATCTTCGTAGGATGAGTGTTCCGTGCCCGGTTTCGGACTGCCAGCTGCTTTCTGGCTGCCGCAAAA  
ATGTTGGCCCGTCTAACCATCGTGACCGTTGGCTGAGGTCTACGTGGCAATGCGGCCTCGTTGCGTCGTCT  
GCTTACAGTTTTTGAGTCCAGTCCATAGTATAGCGTCGCTGATCGCTATACTGTGCTCCTTTTTTGACAGTGTC  
CATCAGCCTCGTTCCCTAACACGGCTGCTTGCAATTCAGTCGTGGAATTGACATCGTCTTCATTGGGGCAC  
ACTTCGTCTTGGCACATACGAAGCATACTCGCACGTCGTTGTTGTCGTAGGTGACCCTCAAGTAAGTCACG  
GCTGCGAATGCTGACTGGCTAGCATCGACAAAAACGTGCAGCTGTATTGCCCGCACAGGTGTTGGGCCGA  
AGTAATGGCGCGAGCTTCCGAAATCCTTCCACGTTGTTTCATATCCTGAAACCATTTGCTAAAGGCCCGGGC  
GAATCTCATCTGGTAAGGGTTCATCCCTTGACATTTTCGTGCGCCAAATCTCACGCATTAGTAACCTTCCAG  
TTATCATGAGGCAGCTAAGAAATCCCAGAGGATCGAATGTTGACATGATCAAGCTCAAGAATTCCCTCTT  
CGTAGGAATTCGCTCCAAATTTAGCACACATCGGGGTACTTTGTGGTACTTCATGTTGAATTTGAAATCGT  
CCGTGGCTGGTTGCCAACACATGCCTAGAAATCTTTTCTTCAGCTTCGCCCCATCCGATGCTCCTCGCCCCAT  
GTTGGCCCAGCGCGTCAGCTACAGTTGGCGAACTGGAAGTAACTGGCACAATTCAAATCCAGCATTTGC  
ATGTATTTCTCTTATTCTTGTTGATATGGTGATGGCTTCGCCTTCACTATCAAAACTATCCACATAGTCGTC  
CACATAGTGGCATTCAAGAATAGCTTTAACCAGCGCGAGGATCTGAATCCTGAAACTGCAGGGCATTCAAG  
GTCTTCACATAGTGTGCGGCGCTTGGCGAACATGCTGCTCCAAACGTCATTACCCTCATCTCATAAACATC  
AGGCTCCCGGCGATCATCGCCGTTTCGCCACAGGAATCGCTGGGCGCATCTATCCTGCGGTCGAATCAAC  
ACTTGATGGAACATCTCTCGGATGTCTCCACAAACGCCAACGGCACCTTCCCGAAAATGGAAGAGAACAG  
CCGGCAGCGACTTATAGTGCTGCGGCCCCCTTGGATAATGCCGAATTCAATGAAATATCACCACCTTTGCT  
GCCGCGTCGAACACCAGTCTTATCTTACCGGGCTTATTTGGATTTTCAACTCCAAAGTGCGGAAGATACCA  
AAGTTTGTGCTGTTGGCTAAAGCGACCTCATGCTGCTTCAATCGTCGAGCATATCCTTTATGAACATAAT  
CGTCCATAAATTTTCATATAGGCTTGTTTAAACTGATCGTTACGCTTCATCTTTCTCTCAATGTTGACCAATC  
TTTTGTATGCCATATCATAGCTTCGTGGCAACTCAACATTATCACGGTTCATAATAAACCCGTCTGGTAA

CGTTCTCCTTTTTTACACCGTGGTGTCTTCGATCCTCTGTGCTCGTGCATCGTCGCTGGCTGCGACTGGTGGCG  
TAAGCTTCACACCGAAGTTTTTCGATATCAAAATAGTCGTTTACCATCTTTTGGATTGCATCCTCCTGCGAC  
ACTGCTAGGAGGCATGACTTTGATGACGTTGCCGTCGGTTGACCTCTTACCGGCCCAAAAACCAACCATCC  
AAGTTCGGTGGCTGCGGCATATGGTCCCTGTGGTGCAAATCTTTTTGTTTGCATTGGCAGTCCAAGATGCG  
CATGGTCAAGTCCAATCAGAAGTTTTGGTACCGCCCCGCGATACGGTTTCATTGGAAGACGTGCACCGTTG  
CCCCACATTTGGACGTCACGTTGATGCAGGCTTTGCATTGGTAAGCTCAGGTTGGACACGGTGTACACATT  
TCGCAACACATGACGTTTGCCTTGTCCGCTCCACTAACTTCCATGCTTACCACTGTGGTTCGGCTCTCTGGT  
TGCTCTTCCACCAAACCACTGTATATTTAGTTGCCTGCGTTCCCTTTTGATATCTAGATCGCGCAGTAGCTC  
GTCGTCGATCATCGTTACAGACGAGCCCTCGTCGAGGAGCGCGTACGTATCGATCCGCTTATTGGCCCCGT  
GCAATGTCACTGGCAATATGCGGAATAGTAGATCTCCATCCGAATCGACACAACCTTAAGTTCCTTTGTTGC  
GTCAATTGAGCATCCACTGGCTGCGGTGCCCTTGTGTGAGGATCCGCTGGCTGCGGCATCCGTCCAGTATT  
CATCACTCTATCACCTGCTGGCTGCGGTGCATTGTGACTCATGGCATCATGATCATGTAAGAGTCGATGAT  
GTCTCTTCCGGCATCCATTAAGTTCGTTGGCCCTATTGCAGACTCTTGCCATGTGGCCAACTCGTA  
AACACGAGAAACAAAGCCGGTACCTTTTTACGACTGTCCACCTCTTTAGCGGAGAGGGCGAAATTAACTC  
GTTGCAGTCCCTGACTGCATGCTATCCATTACAGATTGTACACTGTTTGGTGCACCTCAGTGACGCCCTT  
TCATTATTCTGGTCAATGCTGGCATGTAGCACTCTACGTTCTGCTGCCTACTATCCACGTCCACAATCGTA  
CATAACCATTTGGCGTAGTCCGTTAACCACGCGCTAAAATGTACGACAGTCGGGAAAGGCCCTAATCGTAG  
CTGCATGTCTGGCCCATTCACCCCTCTTGCTTGGTGGTAGTTTACGACCAAATCCTCCATCAGTGTAGGA  
TTCGCTAAATGCTGTTCCCGTTAGCCGATTGTAGGAAAGGCGGCAAGGTTACTCACGCGTGTAGCATATG  
GCACGATTTTAGCTATGCTGTGCTCCTGAATTGGCTGCACCTCTCGAATACTAATTAGCTGGCTGCGTTATT  
AGCTGTTCTGGGCGGCCGTATCTAAAACGGTAATTGTTCCATTACGTTGTTTACATTCTTGGGATGTATGA  
GCAACGACTTCACAGTGTACGTGCTTCGCTTTGAGTGCCTTCAACAATCGCTGGTTATTCTCCAGATTT  
GTACAGTTGTACGCCAAAGTTGTTTCCGTAAACGCGCAGAAGAATATAGGCCAATCCTCAGGTTGGCCTC  
CAAACTCGGGTAGATCTGGTAATTTGCGTGGCAGGCATACATCGTTTCTGGGAGTCGTCCATGCGAAGTTC  
CCAGTTGCCTGCGTTGGCTCCAAAATTATCGCTTGTGTTGTTCTCCTGTGCCGGAGTGTAGCTGAGCGTTGG  
CTGTGCAATGCCTGCAGAGCAATATGGCGTCGAGCGGCTTGACGTTGTAGAGCAGTTATCCATAACTGTA  
GCCCCGTTCTACCGTTTGCAACTGTGTTCCCAAATTTCCACTCAATGACGTAGGCAGTGCCTCACTCAAAGA  
TGGCGATCTGCTCAAATGGTAGTTCCACTCAAATTTGCAGTTTCACTCAAACCTTACTCTTGAATTTGGGA  
CTACACTCATAGTTGCAGTTTCACTCAAACCTTCCACTCGACGATGGCTCTCCGCTCAAAGCTCCGATCAA  
GATGGCGGCAGGTTAGCTGTACCACTCACGCCAGCATTACTCAACTTAACGGGATCAGTAACCTGTACTCA  
CATGTGCTTGACCAGTTTTTACCTCTGCAACTCGTGCTCTAGCGCAGCGACTCTCTTTATCAAATCCATGA  
CTTGCGTACTTGAGAGTTGCGTGCTTGGGCTTGGCGCTCCTGTCAATGTGCTGGCTCGTGCACCTACTCCC  
GCGGCCACAGTGCCGGCAGGTTGTACACTTGTGTCCACATCCACGGTGCTGGGGCTTTGTGGTGCGCTAAC  
AGCGGGAACCTTGCAATTTGTGATACAGTGCTCACCATTCTACTTGTCCGCTTTGGCTGCGTCCCACTCGCCG  
TGGTAGCCTCCTGGCCATCGTTTAAGCGTGGGGTGACCGTTGTGTATCCTACTTAGCTCGGAGATGGTTT  
CTACTATATTTTACGCTGGCTGCGTACCAATGGTGACTCTGCCTGTGCTGTGTCTATGTACACACACTGTA  
ACACCAAAGTTACACCACGTCTTGTCTTCAGCGCAAGTCGCCCTTGCAAGTTTCTTACAATAAGAACTGCGA  
ATAAAAGATCATGTGCGGTGCCAAACGAAGGTGGAGTTGCAATTTGAACACTGCAAGGTTTACGCCTGGC  
CCCCGGCCATGTTACTCCGATGTTAATAGAGACAGCGTAATGCAAAACGTGCTAGTGCAAGTGTTTTATT  
TGAACGGATTACATAGGTTAGAAGTTAGATATATATCCCATCTTA

>160\_rnd-6\_family-2344\_\_LTR\_\_Gypsy

ATATAGGAATATGGGGGGGAAAACAATCAAAGGCAGATGATAACACTGCCAATGTAGTTAACGTAGTAGA  
AGTCGTAGACACCACTCCCCATGTGCAGTTAACAAACATACTGCTAATAATACTCATTGTAATATCTTCAG  
TAAACATCCTTCTGAAGATTTATCTTCTTCATAAAAAATCACTGAGGAAGCGTTACATGAGTCGAGCCAA  
GACTTAGACAAGGTCTAAGCCACTGCTTAAATAAAATATTTAAGTAGCGGAAGCTTACATGGACTGGTCC  
CAAATAGTAGAAAAGATAAAGCGGTATAGAGAAAATTTTCGATAAATCATACAAGTGCCTCAATAAAAGC  
GCACCAGTTTTAAGACCCACCANAATNAAACATGCTGAGATCCTTGTGTATGAGTATAATGAAATCAGGA  
GTCCTTGACGTTGTAAACGACAATGTCAACGTAGGCTGAGCGGTTTACATNTAGCCCAAACCTTCAATTGAC  
GTGTTAAAGAGTCTAAGGGATAATCTGGTAGACATAAATCGGAAAGGCATGATCTCCAGCTTTATCTNCC  
ATCGGCGCTAAATACACCGGTAACATTCGANAAGTCACTNACTGACATCAGTAGAAGAAAACCTTGANCAA  
ATAGAAGANACAAACGATTAGTAAACATGGCACAAACAGCTGTAGAATTTATCAAGCTAGCCNCATCTCT  
GATACCAGAGTTTGACGGTAAGCCGGAAAATCTACAAAGCTTCNTAGATGCTCTGAATCTGNTAGANNCC  
CTAAAAGGNACACACGAAGCAACGGCCGTAAAGCCTTATAAAGACAAAGCTAAAAGGCCATGCCAGGAAC  
CTGATAAGTGATGAGCAGACAATTGCNGCAATCATTACGCAACTATCGGACGCAGTAAAAGGAGAGTCG

GTAGAAGTTGTATCTGCTAAGCTTCTNAACTTGCAACAGAAGAACAACAAACGGCTAACCAATACACCCAAG  
AGGTGGAAAACTGGCAAAGGCCCTTGAAGGNGCCTATATCAGTGAAGGTCTAAGCCAATCACTTGCAA  
ACAAATACAGCACTACAACAGCCGTAAGCTATGACCCAAAATTGTTTCGATTGATAAGGTAAAACCTTAT  
CATGCAGGCAGGCACATTCACAAATATGAATGATGCCGTCTCCAAATTTGTCAATAGTTGCACGGAGGTA  
ACAGGTCAAAGTAACACTGTCCTGTATTATCGACGAGGTGCAAATCACAATAATAGAGGAGGCCGAGGTT  
ATAATCGTGGCAGAAATTACAACCACAACAATTACAACCGAGGCGGTAACAACAACAACAATAATTACA  
ATAACCGTGGAGGAAGACGAGGCCAAAATCGAGGAAGAGGCCGAGGTAACCTCAACCAAGGTNACAATA  
ATAACAATGTGAGAGTGGCGCAAAATGCGTCGGAAAACCTCTCAGAACCCTTTAGGAAACAACCAGTAAA  
TGCAAAGGTTTCATTCCATCAATTACAGTCTTAATATATTTGTCACTTTTTTATAATCATTCAACTGAAAATA  
ACTCACATTCCTAATAGATACTGGTGCAGATATCTCACTTTTTAAAAATAAATTCAGATAATTTCAAAATTC  
AAGAAGACAAAATTATAAACATCCAAGGCATCGGCCAGGGTGTAATAAAATCGCAAGGAACAACCTTCAA  
TAGAACTTCAATCAACAAAATATATTATTCACACGAATTTCAATTTAGTAGACTCCGATTTTTCAATACCG  
TGTGATGGAATAATAGGCATTGATTTTTATTAATAAAATTCATTTGTCAATTAGATTTCAAACCAAGTGAAGA  
CTGGTTTATAATTAGACCTCAAACTTAAATTATCCTATTCATGTTCCGATAACATATAGTGCTGGCAACA  
ATACAGTTCTCCTGCCAGCCAGATCCCAAGTAATTCGAAAAATAGACATTAATNCAGTAAACGATTATAT  
ATTTGTTCTTAATCAAGAAATACATAATGGAATTTATGTTGCAAATACAATAGCAGCATCCAAACATGTAT  
ACATTCGCCTTCTAAACACAACCTAATTTGACCAATTGGTCAAAGTAAACAAAATCCAATATGAAAATTT  
AACAGATTACGACATTCATAACACTAATCCAGAAAATAGAAGCGAACAAGTACTTTCAAAATTAAGAA  
AAATTTTCCAGAACAATTCAAAAATCAATTAACAGAATTATGCACCAAGTATAGTGACGTGTTCCGACTG  
GAAACCGAACCAATAGCGACAAATAATTTTTATAAACAAACATTAAGACTTAAAGATGATGAACCCGTTT  
ATATNAAAACTACAGAAGCCCGCATAGCCAAGTTGANGAAATCCAAAAACAAGTAGGGAAATTAATAA  
ACGACAAAATCGTNGAACCGTCTGTATCCGAGTATAACAGCCCACTCTTGCTAGTTCCGAAAAAATCATT  
ACCAAATTCGGAAGAAAAGAAATGGCGATTAGTAATTGACTATCGCCAAATCAACAAAAAACTACTTTCT  
GATAAATTCCTCGCTCCCGAGAAATTGATGATATTCTAGACCAACTGGGCAGAGCTAAATACTTTTCATGCCT  
TGACTTAATGTCAGGTTTCCACCAAAATTGAACTTGAAGAAAATTCAAGAAATATAACGTCTTTTTTCAACGA  
GCAATGGCTCATATCGCTTCACGCGATTACCATTTGGTCTTAAATAGCACCAAAATTCATTTTCAGAGAATG  
ATGACTATAGCATTCTCGGGTTTAGAACCTCTCAGGCATTCCCTTTATATGGATGACTTAATGGTGATAGG  
ATGTTCCGAAAAACACATGATTAAAAACTTAACTGATGTTTTTAATGTATGTAGGAAATATAACCTAAAGT  
TGCATCCAGAAAAATGTTTCATTTTTTCATGCATGAAGTGACATTTTTAGGTCACAAATGCACTGACAAAGGA  
GTATTGCCAGATGACAAGAAATTCGACGTCATCAAAAATTATCCTGTCCNCATGATGCGGACAGCGCGA  
GACGATTTGTAGCATTCTGCAATTATTATCGTCGATTTATAAAAAACTTCGCCGATTATTCACGGCACATA  
ACTAGATTATGTAAAAAGAATGTTCTTTTCGAATGGNCAAGTGAATGCCAAAACGCATTCCAATACCTTA  
AAGAAAAGCTTATGCACCCACATTATTACAATATCCTGATTTTCGCAAAGAATTTTGCATTATAACAGAT  
GCTAGTAAACAAGCTTGCGGAGCGGTTCTAACTCAGAACCGTGACGGAATTCAGCTCCCAATAGCTTATG  
CATCTCGTTTCAATTTACAAAAGGGGAAAGCAATAAGAGCACAAACAGAACAAGAGTTAGCGGCAATTCATTG  
GGCAATTACCCATTTTAGACCATATATTTATGGCAAACACTTTACTATTAACCGGATCACAGACCATTGA  
CATATCTTTTTTCTATGACTAATCCCAGCTCGAAATTAACCTCGCATGCGGCTAGAGCTTGAAGAATACGAC  
TTCACAGTAGAATACCTAAAGGGGAAAGATAATTTTCGTAGCAGACGCACTTTCGCGTATTAATATAAAAG  
AACTCAAAGATATGCAACATAAAGTCCTGAAAGTCACTACCAGGCGACAAAGTAGACAAAATAAAAACT  
GTACAGTAGAAAATTATGAACTTCTGCCAAGGCAAAGTCATAAAAAATGTATCTAAGCCCAACGTACATGA  
AGTCATTACNAATGACGAAGTACGAAAAGTAGTGACCTTGCGCATAACAGAATCTAAATGTTTATTTAAA  
CATGGAAATAAAATTATCGCAAGAATTGAAGTTAGCGATTTATATACCAATGGAATTCTCGACTTAGGTC  
AGTTCTTCCAAAGGCTCGAAAAAGAAGCCGGTATATTAATAATCAGCCAACTCAAAGTGGCACCGAGCG  
AAAAGATCTTTGAATCAGTTTCAATAGATTATTTTAAAAATATGGGCAATGAAATATTAATAATCTTTAAGA  
GTAGCGCTACTCCAGCCGGTGACCCAAATAAAAGATGAAAAAGAGATACAACAAATATTGTCTACATACC  
ATGACGACCCAAATTCAAGGAGGTCATAGCGGCATAACAAGAACGCTAGCGAAAATAAAAAAGACACTAC  
TACTGGAAAAATATGACACGTCATATAAAAGAGTACGTACGTAGATGTCAAAAATGCCAAATGTCTAAAA  
CAAAGACGCACACAAAAACTCCTTTGACTCTCACAGAAACACCTGTGAATGCTTTTCGATATAGTGATAGT  
GGACACAGTTGGTCCGCTACCCAAATCGGAAAATGGTAATGAATACGCAGTCACATTAATATGCGACCTT  
ACAAAATATTTAGTAGCCATTCCAATAAAAAAGCAAAAGCGCAAATANTGTCGCAAAAGCTATATTCGAAA  
ATTTCACTCAAGTTCGGTCCAATGAAGACGTTTCATCTCGGACATGGGAACAGAATACAAAAACCCGAT  
TNTAANTGATTTGTGCAAGTATNTGAAGATCAAGAATCTCACCTCTACTGCACATCATCACCAGACATTNG  
GGACAATNGAACGAAGTCACCGAACTTTTAATGAATACATNCGTTCATACATNTCNGCNGACAAAACTGA  
TTGGGACGTNTGGATCCAATATTTTCGCTTATTGCTTCAACACGACCCCATCNACGGCGCATGANTATTGTC



AATTCAAACGGCACAGACGTGCCCGTGTATTAACCTATTTGAATCTATCTCATGGCGACCGTGACAGTGGT  
TTTGGTAAGAGGTTCTAGTCGGGAGCTCCCGACTAGGGGATACCTTGAACCCTCTTCTTCCAACATCAAAT  
GCATATATATATTTTATTTTAGAAGCTATATGTCAAGTTTGGTGACTTTAGCTCTTATTATTTACCAAAT  
GCCCAAAAAACAGGATATCGATATCGATAAATTTTATCGATTGCTTGGAATGGAGTAAGTTAGCGATT  
ATCGAAAATAAACTCGATCTGCGCGGGAAGTACGCGGCACTTACATTTCTGTTCAAATCGTTCAAATTCTGA  
ATCTGAATTGTCTTTTGGTCATCTACATCATCTAATTCTCTGGATGCGTTAACTAACTCCTTTACTAATGTT  
GGCAATTGTTACGCCAAAATTTGGCTTACTGTGGCTGTTATTATCTGGTCAGTCTCTATTTTGTAAAGCCAAG  
ATGTCATTATTGTAGTCTGTTTATGCTATGTCCGCTTACTGGTATTTGTCTACTTGGAGATCTAATCAAAT  
TACGTTTATTAGCCATTAAATTTGTGTAAGTTTGTGTTTATTCTATATTTTCTCTTGATTGTTTTTCATTTGAA  
AACCAGTGGCTTCCTTTTTTTTACTTTGGAGGGTCTCTTACGAATCGTAAAGCTTAAATTTCTGTTATGCTAC  
GTTTGTCAATTTTTATATTTTCAATTATCGTTTTAATCTTACATATTTTCCTTTTTTTCTTTTTGTCTTAAAAATATT  
TGCATTGTTGATAATTTTTCTTTAAACGCTGAACCCATTAAAAATGGGCATAAGGGTATATTGTATTTGTG  
CAAAACCCAAATGTATGTAACAGGCAGAAGAAAGCATCTTCGACCCCAAAAGAACATATATTCTTGATC  
AGCATCAAGAGCCGTGTCGTTTCATGCCATGTCCGTCTGTCCGTCCGTCCGTCCATCCGTCCGTTTGTACGA  
ACGCAAGGATCTCAGAACCTATAAGAGCNAGAGCTTGAAATTTTCGATGTAGGTGCTCCTAGTGCCCGCG  
CAGATCGAGTTTTTTTTCTGCTAATCGGGAGCTCCCGATGTCAAGTTTGGTGACGCTAGCTCTTATTATTTAC  
CAAAATTGCCCAATAAACAGGATATCGATATCGATTTTTGTGCGATTGTTTGGAAACGGAGTAAGTAACGG  
AGTAACGGAGTAAGAAGACTGATTGGTTGGTATGACACGGGGTCATCCTCAGGTTTGCCAGGCTTATGGA  
TCATTAATATTCTCGTCAGCCGCCATCTGATTGGAAAGTACTGTATCCTTAGTATAGTATTAATAAATCAAT  
ACAATTAAGAGAAACGCTCTTTTCGGCAAAGCCCTCTATCTCTATCTCTATTTTCATGTTTCATATATACCCCC  
TCTATNTAACTTCTTAATGCTATTAAGTCTATCTCTTCTTATTTTTTGTATAGGGATCCTTTAGTTATCCNTG  
GGCACTTTGGTTNTCCAAATATCGATTGGTCATCACCATCGGACTGAAACTTTCTGTTGCCGCCTTGATCTT  
CCCTGCTCAGAGATTGAGTTGGTTAGTTAGGTGGTGCATCGTTTATAATAAGTGTTCGCCCA

>9\_rnd-1\_family-420\_RC\_\_Helitron

GATCGGACCACTATATCATATAGCTGCCATAGGAACGATCGGTCGAAAATTAAGTTTTTTGTATGAAAAA  
AACATTTTTGTTTTTCAAGATATCTTGACCAAACCTCGGCACTTATTAGTTTTACTNTACTCCTCATATATGT  
GNAAAATCCTATTAAGATCGGACCACTATATCATATAGCTGCCATAGGAACGATCGGTCGAAAATTAAGT  
TTTTGTATGAAAAAAACATTTTGTTTTTTCAAGATATCTTGACCAAACCTCGGCATTTATTAGTTTTACTTTAC  
TCCTCATATATGTGCAAAATCCTATTAAGATCGGACCACTATATCATATAGCTGCCATAGGAACGATCGGT  
CGAAAATTAAGTTTTTGTATGAAAAAAACATTTTNGTTTTTCAAGATATCTTGACCAAACCTCGGCATTTAT  
TAGTTTTACTTTACTCCTCATATATATGCAAAATCCTATTAAGATCGGACCACTATATCATATAGCTGCCAT  
AGGAACGATCGGTGCAAAATTAAGTTTTTGTATGAAAAAAACATTTTGTTTTTTTCAAGATATCTTGACCA  
AACTCGGCACTTATTAGTTTTACTTTACTCCTCATATATGTGCAAAATCCTATTAAGATCGGACCACTATAT  
CATATAGCTGCCATAGGAACGATCGGTGCAAAATTAAGTTTTTGTATGAAAAAAACATTTTGTTTTTTCAAGA  
TATCTTGACCAAACCTCGGCATTTATTAGTTTTACTNTGCTCCTCATATATATGCAAAATCCTATTAAGATCG  
GACCACTATATCATATAGCTGCCATAGGAACGATCGGTGCAAAATTAAGTCGTATGAAAAAAACATTTT  
GNTTATCAAGATATCTTGACCAAACCTCGGCATNTACTATTTTCCCCGTACTTCTTAGATAGGGGCAAAGCA  
CTATGAGCATTATGAAAAGGTTGGGTCTGCAAGGGTATTAGATCTTTGGCGTGCCGAAGATAGCCCTTCTT  
NCTTAAATTTTTTTATATTCCNTTTTTATACCCTTGCAGAGGGTATTATAATTTTGTGCGTGAAATGTGTAAC  
GCATAGAAGGAGACATCTCCGACCCCATAAAGTATATATATTCTTAATCAGCATCAACAGCCGAGTCGAT  
ATAGCCATGTCCGTCTGTCCGTCTGTCTGTTTCTATGCGAACTAGTCCCTCAGTTTTAAAGCTATCTTAATG  
AACTTTGCAGAACTCCCTCTTTCTGTTGCACGCAGCACATATGTGAAAAACCAGCTGGATCGGACCACTA  
TATCATATAGCTGCCATAGGAACGATCGGTGCAAAATTAAGTTTTTGTATGAAAAAAACNTTTTGTATTATC  
AAGATATCTTGACCAAACCTCGGCATTTATTAGTTTTACTTTACTCCTCATATATATGCAAAATCCTATTAAG  
ATCGGACCACTATATCATATAGCTGCCATAGGAACGATCGGTGCAAAATTAAGTTTTTGTATGAAAAAA  
CATTTTGTTTTTTCAAGATATCTTGACCAAACCTCGGCATTTATTAGTTTTACTTTACTCCTCATATATGTGCA  
AAAATCCTATTAAGATCGGACCACTATATCATATAGCTGCCATAGGAACGATCGGTGCAAAATTAAGTTT  
TTTGTATGAAAAAAACATTTTGTTTTTTTCAAGATATCTTGACCAAACCTCGGCATTTATTAGTTTTACTTT  
ACTCCTCATATATATGCAAAATCCTATTAAGATCGGACCACTATATCATATAGCTGCCATAGGANCGATCG  
GTCGAAAATTAAGTTTTTGTATGAAAAAAACATTTTTTTTTTCAAGATATCTTGACCAAACCTCGGCATTTAT  
TAGTTTTNCTTTACTCCTCATATATGTGCAAAATCCTATTAAGATCGGACCACTATATCATATAGCTGCCAT  
AGGAACGATCGGTGCAAAATTAAGTTTTTGTATGAAAAAAACATTTTGTTTTTTCAAGATATCTTGACCAA  
CTCGGCATTTATTAAATTTTTACTNTACTCCTCATATATGTGCAAAATCCTATTAAGATCGGACCACTATATC  
ATATAGCTGCCATAGGAACGATCGGTGCAAAATTAAGTTTTTGTATGAAAAAAACATTTTGTTTTTTCAAGA

TATCTTGACCAAACCTCGGCATTTATTAGTTTTACTNTACTCCTCATATATATGCAAAATCCTATTAAGATCG  
GACCACTATATCATATAGCTGCCATAGGAACGATCGGTTCGAAAAATTAAGTTTTGTATGAAAAAAACATT  
TTTGTNTNTCAAGATATCTTGACCAAACCTCGGCATTTATTANTTTTNTNTACTCCTCATATATATGCAAAA  
CCCTATTAAGATCGGACCACTATATCATATAGCTGCCATAGGAACGATCGGTTCGAAAAATTAAGTTTTTGT  
TGAAAAAAACATTTTGTTCATAGATATCTTGACCAAACCTCGGCATTTATTAGTTTTACTTTACTCCTCAT  
ATATATGCAAAATCCTATTAAGATCGGACCGCTATATCATATAGCTGCCATAGGAACGATCGGTTCGAAAA  
TTAAGTTTTTGTATGAAAAAAACATTTTGTTCATAGATATCTTGACCAAACCTCGGCATTTATTAGTTTTA  
CTTTACTCCTCATATATATGCAAAATCCTATTAAGATCGGACCACTATATCATATAGCTGCCATAGGAACG  
ATCGGTTCGAAAAATTAAGTTTTTGTATGAAAAAAACATTTTGTTCATAGATATCTTGACCAAACCTCGGCA  
TTTATTAGTTTTACTNTACTCCTCATATATATGCAAAATCCTATTAAGATCGGACCACTATATCATATAGC  
TGCCATAGGAACGATCGGTTCGAAAAATTAAGTTTTTGTATGAAAAAAACATTTTGTTCATAGATATC  
TTGACCAAACCTCGGCATTTATTAGTTTTACTTTACTCCTCATATATGTGCAAAATCCTATNAAGATCGGAC  
CACTATATCATATAGCTGCCATAGGAACGATCGGTTCGAAAAATTAAGTTTTTGTATGAAAAAAACATTTT  
TTTTTCAAGATATCTTGACCAAACCTCGGCATTTATTAGTTTTACTTTACTCCTCATATATGTGCAAAATC  
TATTAAGATCGGACCGCTATATCATATAGCTGCCATAGGAACGATCGGTTCGAAAAATTAAGTTTTTGTATG  
AAAAAAACATTTTTCATAGATATCTTGACCAAACCTCGGCATTTATTAGTTTTACTTTACTCCTCATAT  
TATATGCAAAATCCTATTAAGATCGGACCACTATATCATATAGCTGCCATAGGAACGATCGGTTCGAAAA  
TAAGTTTTTGTATGAAAAAAACATTTTGTTCATAGATATCTTGACCAAACCTCGGCACTTATTAGTTTTA  
CTTTACTCCTCATATATATGCAAAATCCTATTAAGATCGGACCACTATATCATATAGCTGCCATAGGAACG  
ATCGGTTCGAAAAATTAAGTTTTTGTATGAAAAAAACATTTTTCATAGATATCTTGACCAAACCTCGGCA  
TTTATTAGTTTTACTTTACTCCTCATATATATGCAAAATCCTATTAAGATCGGACCACTATATCATATAGCT  
GCCATAGGAACGATCGGTTCGAAAAATTAAGTTTTTGTATGAAAAAAACATTTTGTTCATAGATATCTTGAC  
CAAACCTCGGCATTTATTAGTTTTACTTTACTCCTCATATATATGCAAAATCCTATTAAGATCGGACCACTAT  
ATCATATAGCTGCCATAGGAACGATCGGTTCGAAAAATTAAGTTTTTGTATGAAAAAAACATTTTGTTCAT  
TTCAAGATATCTTGACCAAACCTCGGCATTTATTAGTTTTACTTTACTCCTCATATATATGCAAAATCCTAT  
TAAGATCGGACCACTATATCATATAGCTGCCATAGGAACGATCGGTTCGAAAAATTAAGTTTTTGTATGAAA  
AAACATTTTNTTTTCAAGATATCTTGACCAAACCTCGGCACTTATTAGTTTTACTNTACTCCTCATATAT  
ATGCAAAATCCTATTAAGATCGGACCACTATATCATATAGCTGCCATAGGAACGATCGGTTCGAAAAATTA  
AGTCGTATGAAAAAAACATTTTGTNTATCAAGATATCTTGACCAAACCTCGGCATATACTATTTTCCCGGTA  
CTTCTTAGATAGGGGCAAAGCACTATGAGCATTATGAAAAGGTTGGGTCTGCAAGGGTATTAGATCTTTG  
GCGTGCCGAAGATAGCCCTTCTTTCTTTCTTTTATACCCTTGCGAGGGTATTATAATTTTGTCTGAAAT  
GTGTAACGCATAGAAAAAGGTGACATTTTCGACCCNATAAAATGTATATATTCCTTATCCGCATGGACAT  
AGGAGTCCGTATTGTATTAATATTTTAAGCGTACGCAGTACTATGTTCAAGTTTATATTATATCTATTCTAA  
AACTCTACAAGATTAAATATATTCATAGATATCGATATCGATAAAATATTTTTTTTATACCCTGAACC  
CATTAAAAATGGGTATAAGGGTATATTGTATTTGTGCAAAATCCAAATGTATGTAACGGGCAGAAAGGAAG  
CATCTCCGACCCCATAAAGTATATATATTCTTGATCAGCATCAATAGCCGAGTCGATCTAGCCATGTCCGT  
CTGTCTGTCCGTCCGTCCGTCCGTATGTATGAACGCAAGGATCTCAGAACCTATAAGATCTAGAGACGAA  
ATTAGATGTAGGTGCTCCTAGTTCCCGCGCAGATCGAGTTTGTTCGATAATCGATAACTTACTCCGTTTC  
CAAGCAATCGATAAAATCGATATCGGCATCCTGTTTTTTTAGCAAATTGGGTAAATAATAAGAGCTAGA  
GCCACCAA

>Ref\_dvir\_190

TCACCCCAAGTTCGCTCTCTGTACACCCCGAAGCAGAATGCGAGTGCCGTGATGAATGTCTGCAACAG  
TGAGTCCATGATACGCTTCATAAATTTGTACACATAGCCGAATGTGCGCTGCATGGAACCAAAAGAGTTG  
GCGTGCTTGATCCAGAGCTAAATCTGCATGTGGAGACTTAAGAATTAGTACACTTTTCCTCAATTCAAT  
GGTTGGAGCTTTAGGCAGACAGGTCGCCGGCCAATTTAGGCGACCATTTAATAGATACGATGGGCCATGA  
AACCAGAGCTCCGACTGGGCTAGGATGTCGGGAACCTGTGCCTCTAGAAAGAATGTCAGCTGGATTTCCGT  
CCGTGCGAACATATCGCCACTCCATACTGGCAGTGAGTTCTTGTATGGCAGCCACACGATTTGCCACGAA  
AACGTTAAATTTGAAGGGCTCATCTCTTATCCAGGATAGGACAACGGACGAATCGCACCAGCAATAAAAC  
TGACTGACAAAGATGCCTGTGCGCTTGACTTCATGCATCAGACTAGCCAACAGCTTCGCTCCACACAATTC  
CAGTTTTGGGACAGTCAATGTTTTTAATGGCGCAACTCGAGACTTGGAGCAAAGGATACGACTTGTGGCT  
AGTGGACTCCTGGCCACTACGTAGATGCAGGCTCCATAGGCCTCCACACTGGCATCGCAGAATCCATGTA  
TTTCAACATCAGCTCCTTCGAAGAGTACTACTCTGGGAAACGATACATGGCGAATGTTGCGAAAACTGCT  
GCATAGCTCCCTCCAGGTCGTATCACGTGCAATCGGCAAGCTTTCATCCCAAGTTAATTTGTCTTACAAA  
GCTGTTGAAGAAATATCTTTGCCTTAGTTATGACTGGTCCCAAAAGTCCAAGCGGATCATAAAACCGGGC

AACAATAGACAGAACTGATCGCCTGCAGGGGCTTAACAGTACAATCTAGAACAGAAAAATGAAAATAGCAA  
CTGGTCGATCGCTGGATCCCATAACAAGACCAAGGGCCTTGGTGACATCGCTTCCATCATCGAACTTTAAGT  
ACTGTTCCCTATCTTCATAAGCTATTCCATTGAGTACTTCTTGGTGACTGGAACACCACTTTTCGAAGCTTGA  
AGTTTCCACGAGACAATATCCCAGCCGTCTGACGAATTTTCTCTCTGGCTTCAGCAACTGAGTTGGCTCCG  
GATATCAAATCGTCAACGTAAAACCTCCTGCTTGATGGCATCCGATCCAATTGGAAATGCATCACGCTCATC  
AAAGGCCAACTGGTGGCATTGCGCGCACGGACTGAAATGATGCTGATTTGGTCCCATATGTTACTGTATCT  
AATTTAAAGATTTTCGATATCCTTCTGAGGCGAGTCCCTCCACAGGATTGCACTGGAAGTAACTATCAGGCG  
AAGTCACTCGGACACAACGATACATTTTGCAAATATCAGCTGTGAGAGCAACAGGATATGTGCGGAAGCG  
AATCAGAATGTGAAACAACCTTAGGTTGAATGATTGGTCCCGCCATCAGTACATCATTAAGAGAATGTCCA  
GAATCAGTAGTTGCTGAGCCATCAAACACAACACGCAACTTGGTTGTGGTGCTGTCTTCTTTCAAGACACA  
ATGATGTGGGAGGAAGTATTTACAACAGCCACTCAACTCTGGACTAACTCGCGACATGTGATTTAGATCC  
AGCTCTTTGATGAATGCCGAATACTGCTCCTTCAGATGCGAATTCGACCCAATTTTCGCTCAAGACTGAG  
AAATCGAAGATGAGCCTGGCCATAAGACTCTCCTAGAAGCTCTGCACTCCGCTTCAGAGGCAACCGCACT  
GAATACTCGCCGGATGGTAAACGGGAGAAAGTTATTGGCAAAATGCTGCTCGCATTCCGCCTCTTCTTTGGT  
GGCCTTTACTGTAGGCTCTTCCAAGCTTTCAATTTCCCAAAACCGCCGAACCAACTCATCCAGACGGACGT  
CCAAGTACTGACTAGCTTCGCTATTAGGAGTGCGGCCGGCAGCCAACAACGAGGTACTGCGCGGTCTCTCAA  
TCCACCGGTCACGACCCAGCCAAGACGAGTTTTTTTGCAGAAGAGGTAGTCTGGCAAAGCACAATTTGC  
CCAACAGACAAAAGCTCATAGAAAAGGCTCGCTCCAATTAAGAGATCCACTCGCTGTGGTTTGTGTAACG  
CAGGATCAGCCAACCTTATGTTTCGAGGGAATTTTCCAGTCTGATGTATCGATGACGAAGCTGGGCTGACT  
ATCGGTAATTGTTGGAGTCACAAGAGCATCAAAGGTGGCTGAATAATCTGAGTCTTGTGACTTCATGTTAA  
TCCTAACAGCTGATCCTTCAGTAGAGACGCTTGTGTCTCCGAGACCCATGACAACTGTGACGACCTGGTT  
TTCTAACTGAAGTCTCAAACGGGATGTGACCATGTGCAACTGCGAGCCTGAGTCTAATAAGGCCCTACAG  
GGAAACAAGGAACCAGAACTATTCTTTACCAGTACCACTGCAGTGGCCAGGAGCACAACACCAGACTGA  
AGACCTTGACAGCAAGAGAGGTTAGTGGAGTGAGAGTGCGTCGAAGTGGCGGCGCCCAAATCAGCCGAT  
GTATGTAATGGTGTGCGGCTCAGCTTCTCTTTTATGCTTTCTCCACAAGTACGACAATGACTACTACTGC  
AAGACCGAGTTTGGTGTCCCTTCCTTAGGCAGTTATAACAAAGGGCCAGTTTCTTGGACTTCCTTATGCCG  
AAGGGATGGAGACAAATTTCCGAATTTACTACATGTGTAGATCCCGTGACCAGACGCATCACAAAACTG  
CACCCATTTTGGTTAGTCTCAGCTACAAGCACTCTTTTGCTGTGGTTAGTGTTATGGTTGGATTTGCCACC  
TGATAATTGGTTATATGGGATGACATGGCATGTTGCACGCTCTCCAGCCTTTGACTACGCCTTTCCAGAAA  
TGTGAAGAACTCATCGGCTGTGCGGATTTTGTCAATGCCTGCGGCCTCCTCCCATTTGGTCTGAGTCTGGG  
TGTCCAACCTTTGAAGCAGCGTGTGGACTATTATGCATCCCGAAATTTGCTCCAACTGCCCAAATTTCTGT  
AAGGCACGCATATGCGAATTGACCTTGTCCGAGAACTCACGCAGTTTTTGAAGCCGACTCCGAATCTACCC  
TCTTGAGCCCAAGAATCTCATTGATGTGTGCCTGGAAAACAAGACGTTTGTACTAAATCTTCTATTTAGG  
ATATCCAGAGCCACAGGATAATTGGCACCGGAAAACCTCCAAGATCGAACCGAATCCAACGCAGGGCCA  
GACAAACATGAACGAAGATGCTGCAACCTTTCAATGTTAGACAGCTCGGTATCCTTGTGCAAACTGACT  
CAAACATCGCGATAAAGTCCGAATATTCGGAAAACACCGGAAAATGGTAATTTGAGCGCGTTCTGTTGG  
CTAAGATCAAGGTTTGGTTTGGCAAGACGAAGAACGGTTGAGTGGGGCGGGCCGTTAGATTGACGACGCT  
GAATATTTACGCGAACGCGAGCTTCAACCATGGCGATCAACTCGTCAAAATCATCGCGTAGTTTGCTGCC  
ATTTATCATCGAAATTAAGCTCCTCTAGCGAGTTATGCGCGGTATTAAAGGCAGACTTAGTTTGTTCATTA  
CAAAAGGCGCACTTCTAAGTCGACGGCACAAGAGTTGTAAATTTTATCCTCAGATAATTCATTTTCAATAC  
ACTTGGCTCGCTCAAACAATGCAACCGCTTTGCGCTTAAGAAAAGACACCCTGTTTGACTGCATATCATCT  
GTGTTCTCGCCTTGCATCATTTTTTACAAGCACAAAATCAGAACACCAAACCTGAGCACACAACGTGCGA  
CGAATTGTGCTGCTGCTTATGTACAAGCGTATGTATATAAGCTGAGCCGGCGAATGACCGCGCAAGGGGA  
AGAGCGCGAAAGTCAACTAGCGGCGTTTATGTATATGCGAATATTTGGGAGCTGTAAATGGTCAGCTCAC  
ACAGGCGGTTTGCCTTGCCTAATTATAACAATTTACGATGATTATGTTCTACTTGAATAATCACAATTTT  
AATTTGCAATAGATTTATTTTGTCTTGTGTGCACTGCAATGTTAAATCTCGCCGGGGCCTCCAATGTTGAG  
TTACTAATGTTTTTTAGCAACTGTTTAGAACCTAAACCAAGAAATAAGTAAATTTTGGCCTTTTACAACAA  
CACGTTATAATTCAGTTTATTAGGCAAATTTATGTAGATTATAAGGTTATTTGGCTGTGGCTCAGAATTGG  
TTCTTCGCTTCGCCTCGATCAACAACGAACTGAGAGAGCAGACAAAAAAGGAATATGCAATTTATAGCAG  
CTGCGACAAGTGCAAGAAAGGCTTGCCAACCTTGTTTATAATAAACAGCTGTTCCACTAGACCAAAATTA  
CAACCTCTTCTTATGTTTACATGAATGTTTGCTTATGCTAATTTGATGAGGCTGCTGCAGAATCCAACATAC  
TCCCCCGTTGGAAGCCTGACTTTCAACAGAATCCTTAAGGGGCAGCAGACACAGCTTGTTTACGGCTCTT  
CGGATGATTCCAGCCGTGGTCTTCATATCAGCTACACGATTGAGTTGATGCACAACGCTTGTGTTTGAGTG  
CTTAGCTCGCTGAGCTGCGTCACACGCTGCAGCCATCCAACGGTCGAGTTATTTGGTTCTGAAAGCGAG



AGTAATGGGCGTGAGTTAACAATAGCTGTGATTTGGCAAACAAGAGTACGAAGCTCTTCAAAAAGTAACTA  
AAGAGCGGCCGACAGAGTGATAGAAATGGTGCTTGGCCAACTTCACTGCCGCCTCCCATAGTCCACCAA  
GTGCGGGAGAACAGGGG  
>9\_rnd-1\_family-277\_\_LTR\_\_Gypsy  
TGTGAGGCGGCTAATGAGACCAGCCACCCACAGTTTTCACGGCAAGGAGCCGTCATCCCTTTGGCCAAA  
TTACGGCAAGGAGCCGCTGGCGGGACAACGTATTAATTTTCTTTAGTTATAAGTATTAATTATATTAGGTT  
AAGATCTTAGTGAAATAAGAGGGCAAGGAGCCATCAGTAATATAAGCAGTTCGATTAGTAGCAAAGAGGC  
AAGGAGCCGCGAATATTATAATTGATTTAAATAGTGAGTTTGAATTTAACCGCCGGCCGCGCTGCAACC  
GTGCGTTGTCGATCGGTTGCTCAACACCGTCTTTGAGAGCGCAACTTCAATTCGGCGGCGAAGAGCGAAA  
GCTCCGAGGCGAAGTTGCGAAAGCTCGCGGGCAAGTTGAGCAGCCGAAGCGAGCGCATGGCTTGCCGGC  
GAGCGTGCCGGCACTTGTGATCGAACGTTAAGGGTGAGTAGAAGTGCTGCGCGAGATAAACGAAATCAT  
AGATGGTATAGTGGAGCGCTAGGGCTCCAGAAAACAGTGCGGCAGGGTTTAGCTTAGGATTTACGATAAG  
GTCGGAATGAATAATAGTGAATAAAGTGCCAACGTTGTAATTATCTAGAAAGTATTGGATTATTCCTGTT  
TCCTGGTAACCCGGCTTACCTTAACATCGGAACCTAACCGGTGTTTCGACCTAACCTCGAACGAGGGGCATG  
CGATACGAGATTGTGGCTCCGGGGTGGGCATTGCCGGTTGGTGTTTAGGTAGTGGAGTTGGTGCGAGGCC  
ACGGCCCGCTAGTGTAGTTGGTGCGAGGCCACGGCCCGCTAGCATAGTGGTACGAGGCCACGGCCCGGCA  
GAAAGATAGAGCGTTTAGGTAGTGGAGTTGGTGCGAGGCCACGGCCCGCTAGTGTAGTTGGNGCGAGGC  
CACGGCCCGCTAGCATAGATGGTACGAGGCCACGGCCCGATGGTGTAGGTGTGTAGAGGTAGATCTGGGT  
TTGGTTTGGTCAGGATACCCCCCCCCCTTTAAGCCTCTCTCCAGCGAAATTATAAATAACTTGTAACCTCGC  
TAGACCTGGTAAGACTGAGAATTATACCCCGGCCAGAAGCTTCCTTACAAGTGGCGCCCGAGCAGGGACC  
AAGAGGCGTTTAGGGGTGTGGCATGTCGGCGGATTAAAGCCCGCAAGCATGCCCGAATAGGTATTTTCCA  
AAAAAATANATATATAGGGTATTTCTAGTCGGGTATACCCTAGAGGGAAGGTAACTAGCAGAGAGCA  
AGAAAATGAGAAGGTCATGTATGTGCGAAATATGAAAATAGGGTATTAAGTAGTCCGGTATACCCAGCA  
GAACATTCCTATACCTTGTGTTAGGCATAGCCAGAAAATGAACACGTGCAGCTGGTGAGTGACAAAAATG  
CTAGCAGCAAGCCGGCAAGTAAGATAAAGAGACGAAAACATAACGGTCGGTCGTGAGAGTACAGCGCGC  
GCGCCAGCCGGGCGACGTCGAGACCACGCTCGCACACGGGTGCCACACGCGCGGCGCAGTCGACGTCG  
GCGTCGAAGGACCGTTAAGGCGTCGCGGCAGCGGTTGTACAGTGGGGCGAATCCAACCTCACGCGCGGTG  
AAAAGTTGAATTCGTGAGTACAGCTGTCGGGGCAGTGAAGTGGTCACCCTTCAAGTGAATGCGAACAAAG  
GGAACAATAAGAGCGGAACAAGTGCCAAATAAAAAAATAAGTGGATAATAATAAAATTTTTCTTTTATAA  
ATAAAAATTAATTAACAAAAAATAAATAAAAAAATAAGTGAATAATAATAAAATTTTTTTTTTATAAATA  
AAATTAATTAACAAAAAATAAATAAAAAATGAGTGGATAATAATAAAATAAAATAAACCGAGGTTCA  
CAATAAAGATAAAGGCAGCGACCACATAAGGAACGGCCTAAAAAGCGGAAAAGTGAGAAAAGAAAAAT  
TTTGAAATACCTTTTTGTTGAGTTTTTTTTTACAAAAAAGGGGGTAAATATTTTTTGTGGAATATTTTTTTGTNT  
TTTTGTTTGGTGGAAGANAGAAAGAAAAAATAAAGAAAAAACTAAAAGGAACCAAAGTGGCTGA  
GCAAGATCGGCGTAAAAGTGAAAAGACACCAACACCAAGAAAAGGGGAGAGGAATAGTAAAGGGACCG  
ACGGAACCCCTAGAACGGGAAGAGAGGGAAACAGCGACGTCGACTAGCAAGGAAGTATACAATAAAGG  
ATGGAGGCAGGTGAGTGCCAAAACCCGGGGGTAGGCGTCCGCTGGATTACACGCGACGCAAAGAGGAG  
TTAGTGGCGATCGCCAGGAGTTTGGGCTGGAAAAGGAGGGGCGCGTGAGGAGGAGCTACGTAAGCGGCTG  
TCCACCTACGTGCAGGAGGGCGGTTCATTCGACTGGGATTTGGGCTCGGCTCGCCGAGCTGGAATCCCAGT  
ATGCTAAAACTCTTGAGCCGCCATCTTGGGGCGTCCCACCCGACTTTGGTGAGCGGCCACGGCAAAAGTC  
GGAACCTGACCTCAGAAGCTCCCAGCTGTACGGGCTTTTGCAGGCGCCACCCCGAGTTTGACCGTCTCG  
GGCGTGGAGGCAGTTCCTGCTCTCGGTGGAAATGAAGACCGCCGAGCAACTGCGGTCAACGCAGAGGTG  
GGGAGGTCCCCTGTTGAACCGGGTGGTGGTCCCTGCTACACTAGGCCGACCATCCATCGGAGGCGAGGC  
CACTTCCCAATGTCCCGGAGCAAGTTCGGAAGTGGGGTATGAGGTACGATGGACGCTCCGACCCCTTGG  
GTTCTTAGAGGACCTCGAGGAGCGCGCTATCACCTATGGTATAGCCCTCGACCGTATGCCAGGGCAATG  
AGCGAGGTGTTCTGCGATAGGGCTGCTCGTTGGTTTCTGAGCAGTGGGCTAAGGGATGTGCCGTGGGCCG  
TGTTTAGGAGGGATTTCTTGAGTTTTTTCTTGCCCCCTCGTTACTTCGAGAGGGCTTGAGGACGAGATCCGA  
TCCCGGAGGCAGCGCGTAGGCGAAGCGTTCAAGGAATATTTGATAGAGCTGAGGGCTCTTATGCACCACG  
CTAGATACGAGCCGGCACAAGAGCTGCATCGGATCTACGAGAACGCCGCTCCGGAATACAGGCTCTATGT  
GCGACGGCAAGACTTTTCTACCCTATCCCAGCTAACTCAACTGGCCGTAGAATACGAGACCGTCGTGAGG  
CAGAGGGCGGGGAGTACTCAGGCAGCCAACCCNTGGGCCNNGGTGTCTCNAGTTCGAATAGTGCAAGT  
GGGCGAGGACGGCGCAGTCCCCGGGGGGACATCTCAATCCGTTCCGGTCTGCTCCAGCGGATCCGGGAC  
GACCGTTGTGGACAACAGGGTCTCCGCCCCACCCGCTGCAACTCACGCAGAGGTGGCCCATCGGATGATG

AGCCAAGAGGGCCGGGAACGGATATGATCCGCGACGGGCGTGTTCGTAGGTGCGCACAGGAGGGGCACTTC  
GCCAGGGAATGTCCCAACGCCCCCGTCTTATTTTGTGTTGGGTATGTGGAAGCCGGGGCCGAAGTAGTCGGG  
AGTGTGTCGCCCGCGCGGAGACGGGAAACGGGCAACGGCGTCGTCCGGACCAGGATCGGGTCGGCGCCG  
ATACACACGGAACGCAGCAATAGGACACCCGCTGAAGGTGGACGGTGGCCGGATCGTCGCTACGGTAGA  
GATCGGCGGACGAACGATGCCCCGCCACGATCGATACCGGAGCCACTCGTAGCTTCATGAGTGAGGACTGC  
GTACGCAAATGGACGATCCGGGGGAAGAGCGGAGGAAATACAGGCACGCATCCGCCTGGCGGATGGGTCC  
ACCCTAGAGGTGGAGAAGGCTTTGAGAGTAGACGCCAGCTTAGGGGAAAAAAGATCAGCATGACGATGC  
TCATCATGCCCTCAATGCTGGACCACGTAATCCTGGGTATGGATTTTTTTGGGGGCGATGGATAACCACAATA  
CGCTGCGGCGAGGCGGAACCTGGTCCTAGAAGCAGCGACGACACCGGGCGTGAGGCCAGGAACGAGCGAG  
GAGTCGGAGGAAGGCCTCCCAGGGCATGAAAGGGGAGCACCTGCTCGGCTACAGAGGGAGCCGGAGGAA  
GGCCTCCCGAGGCATGGAAAGGGAGCACCTGCTCGGCTACAGAGGGAGCCGGAGGAAGGCCTCCCAGGT  
CATGGAAAGGGAGCACCTGCTCGGCTACAGAGGGAGCCGGAGGAAGGCCTCCCAAGTCATGGAAAGGGGA  
GCACCTGCTCGGCTACAGAGGGAGCCGGAGGAAGGCCTCCCAAGGCATGGAAAGGGAGCACCTGCTCGG  
CTACAGAGGGAGCCGGAGGAAGGCCTCCCAAGNCATGANGGGGAGCACCTGCTCGGCTACAGAGGGAGC  
CGGAGGAAGGCCTCCCAAGGCATGGAAAGGGGNACCTGCTCGGCTACAGAGGGAGCCGGAGGAAGGCCT  
CCCAAGGCATGGAAAGGGGAGCACCTGCTCGGCTACAGAGGGAGCCGGAGGAAGGCCTCCCAAGGCATG  
AAAAGGGAGCACCTGCTCGGCTACAGAGGGAGCCGGGAGGAAGGCCTCCCGAGGCATGGAAAGGGAGC  
ACCTGCTCGGCTACAGAGGGAGCCGGGGGAAGGCCTCCCGAGGCATGGAAAGGGGAGCACCTGCTCGGC  
TACAGAGGGAGCCGGAGGAAGGCCTCCCGAGTCATGANGGGGAGCGCCTGCTCGGCTACAGAGGGAGC  
CGGAGGAAGGCCTCCCGCGGCATGGAAAGGGGAGCACCTGCTCGGCTACAGAGGGAGCCGGAGGAAGGC  
CTC

>9\_rnd-1\_family-188\_\_LTR\_\_Gypsy

ACACCAGCTCCAGATGCTGATATAGCACTGAGCCGGATGTTCTTACGAGCTAACAGGGGGTCAGCAAAATG  
CAACATAACACCAGCCGCAGATGCTGACATAGCTCTGGGCCGGATGTTCTTGCACGACGGCAGCGCACGA  
GNCGCAAGCTAAGCATTCTAGCGGCCGTTGTGAAAAGCACACAATAGCTTAGGTANTGTTGATCAATCTT  
TTGTAAATTTAGTTTTAATCCGGCTTTTACTGCGGCACATCGGCCCAGCGACTTCGCGTATAATTTAACTC  
ACTNAATNCGGCGTGTGCGCCTAGTGTTTTACAAATAATAAAATAATCAAAATAAAGTCCTATAACGAAA  
ATCCGCGAGGACTTNTTATTTAAATCCTAATTGGCGCCCAACGTTTTTTCGGACCATTTTGTTCATAATTAT  
ATTGTGTGCGGTGCAGTGTAAGAATAATCTACCNGTGCAACACACTTCGCGTTGTGTAATAGCAATAC  
CCAACCTACCAGTGCAAGCAATAAAAGCTGTGCCTGACCTACATCAACTTACGTCAGCGGCACAAGCCCA  
ACAAAAGCCATTTGATACACCGAAGCCGCTGGAGCTCTTCGGCCAGCGACTTGTCACCAAACCAGGCGCA  
AGCGGGTTTGGGCAGCGACGTAAGCCAACACCCACAGACTTCAGCGAGGGATCATAAAAAAGCATTTCGC  
GNCTGCAGCGTGGAANCAGTAGTTTTANACGTAGAGCATAACAACCCTTCTAGGATCAATAAAAATGTAA  
GTGGGCCATCATTTGGCACAAACTTTTTTCAATTTGCGTGATTTATTTAAAATAAAAATCCAAATAAAATNT  
AAAGTATGAAATATTAATAATTGCAGTAATTGTGCTCCCAACTAACTTTGAGTAACACAATTTTGCCTCAT  
CAGCAATTTTCAATAAACTCTCCTCNGTCAGCATTCAATTAATTTACCGTTGTTGATTTGCCCTTGAAATTG  
TGTTGTTATTATTGTTGACAGTATAGTNCATGAACAGCTCGTTTCTCAGGTACAGAGACAGCTCTGCGAGG  
GGATCTGAGTCAGACGACTCCACCACCTTAGATAGGGAAGCCGTCCCGCAAAAAATCGCTGACAACAGGT  
GTAAAATGGGAATGGAGCCTGAGCAGCTTAGGGCTTTGGTGCAGGCCGAGTGGCCTCCGCCTTNGAAGC  
ACAGAGCGCAGTATTGAAGCAAAGAGATGCAGAACTGAGGGCTTCCTTAAACGCTCGGATACAAGAATT  
GGNAGGCAGAATATCTGCCAGTAGTATAGAAACNACCGCCGGTCCAGGCATTTGAGCCGGTGGAATCA  
GAAACGACGTCCAATGTAATGAACCGTTGGACGCCGTTAAATGCTTACCAGAATTTACGGGGGTGCCAGA  
GACGTACGCCTCTTGGAGACAAGCTGCGATAGCGGCATATAAAATTTACAAGCCATACGACGGCAGCTCA  
CGCCACTACCAGGCGGTCATTATTATNAAGAGCAAAATTAGAGGGGCANCTGACGGCGTTTTTGGGTGAGT  
TTGGCACAGTAATGAATTTTATGATGCCATAATAAACCGTCTCGGATTTACATACAGGGATAAGAGAGGCA  
TTCACGTCGTAGAGCAAGAGATGAGCACCTAAGACAGGGCTCGTTAACAATTTTACAATACTATGACGA  
GGTTGAGAAAAAGCTNACTCTTCTACCAATAAGGTCAACATGTCTTATGAACCAAGCATGGCACAAGGG  
CTCTGTACGAAGTTTATAGAGATGATGCGTTGCGTGTTTTTGTCTCAGGCCTAAAGCGTAGCCTGACGGATGT  
CCTGTTTCGCGGCAAAAGCCTAAGGACTTACCGTCGGCCCTAGCGCTAGCGCAAGAGGTAGAGGCAAACCAT  
GAGAGGTACGCCTTTGCCGCTAGCTTCGCTAAAGGGCAAGAAGATAGGGAACGAAAAGTGACCCCGAGG  
CCGCAGGTCCGTCAGCAAGATAGGGGTCAACAGCAGGGGGATCCGCAACCCAGCGGTTCCAAAAATCCT  
CACTTCACTAAACAACAGAAACAGCAACAAAGTCAATTTGAGCAACAGAGTGGCAGGTGGAACAAAGGT  
GGCGGGTCACAGGAACCAATGGACGTGATCCATCTGTGTCNAAAATTCTACAACCATCGCAAGCACACAG  
CCTACGTTAACTCTAGCGCTCCTCAAGCCTACAAAAGAACGGCCACGTCTGGGCGCTTAAGCGGACAGAG

GAGGCAGAGAGTCAATCACACAGCTCACGAGCCTGATCAAGATTTCAGGTTTCGTATGCTAGCTCTGCAGCA  
GCAGCAGAACAGCAAATTGCCGACGACAATGGTAGCGGNTATGACTCAGACACTCTCAATTTTTTTAGGGG  
AAGCTCCCTGCTGCCCTACATCAGTAGAAGAGTAGCAGGGATCCAGATGAGGTTTCTCATCGACACGGGC  
GCTTCCAAGAATTATATCAGACCACATAAAAATCTAAAAGGTGTGTGCCCAGTAAATTCTCCCTTCTCTAC  
CCATTCTATACACGGCACCACGAAGATCACTCATAAGTGCCTTATATCTCTGTTCGGCAAAACTGCCACAT  
TTTTCTTACTCCCAAACCTGTCCACATTTGATGGAATTGTGGGCCTCGACTTGCTCACGCAAGCAGGAGTT  
TCGCTTTGTCTTTCTTCTGGCCAACCTCAAATGTGGCGCAGAACTGAACAAATCGAATTCCACAGGTGCGC  
GGATGTTAACTTTACCAATGTTGACTGCGCCGACGCGCCCGATGCTGTAAAAGATGCATTCTTAAAGATG  
CTAAAAGCAAACATAAGGCCTTCGCGGATCCGGAAGAAGCACTTCCCTATAACACATCAGTGGTGGCAA  
CCATCAGGACCACTGATGAACAACCAAGTTTATGTCCGACTGTACCCCTACCCCATGGGAGCAGCGGAATT  
CGTTAATAAAGAGATTCAAAGCCTTCTGAAGAACGGTATCATCAAAAATCTGTCTCCCCTACAACAACCC  
CATTTGGGTGGTGGACAAGAAGGGGACGGACGAGTTTGGTAACAAGAATATGCGCCTCGTAATGGATTTT  
CGCAAACCTAACGAGAAAACCATCGCAGACAGATACCCTATGCCTAACATTCCAATGATTTTGGGGAATC  
TTGGCAAAGCTAAATACTTTTCGACATTGGACCTAAAATCCGGCTATCACCAGATCACGCTAGCAGAGCG  
TGACCGTGAAAAACAGCCTTTGCAGTTAACGGGGAAGTACGAATTTCTGTCGACTTCCCTTTGGGTTGAAG  
AATGCGGCCAGCATCTTCCAAAGAACTGTTGACGACGTAAGTGTGAGCAAATTGGCAAATCTTGCTATG  
TCTACGTTGACGATGTCATCGTCTTCTCAAAAGACGAAAGTTTCTCATGTCCAACATGTAGAGTGGGTCTTA  
AAGAGCCTGTACGAGGCAAATATGAGAATCTCCAAGGAAAAATCGCGTTTTTCTAAGAAAAGCGTAGGTT  
TTCTTGGTTTCGTGGTAACCAGTAATGGAGCTACAACGGACCCCGAAAAAGTCAAAGCGATTTCAGGAGTT  
CCCAGAACCAAGAATATATTCGAGATCAGATCATTTTTAGGACTGGCTAGTTACTATAGGTGTTTCATCA  
AAGGCTTTGCCTCAATAGCAAAACCCATTTCTGATCTTCTAAAGGGCGAGAATGGGTCAGTAAGTAAACA  
TAGATCGCGAAACATCCCGGTAGAATTCTCTGAGCTTCAGCGTCACGCATTCCAAAAGCTACGCAACATTT  
TGTCGTCAGAAAACGTCATGCTCAGATACCCTGACTTTAAGAAGCCGTTTGATCTAACGACAGACGCTTCA  
GCTTACGGCATAGGGGCGAGTGCTTTCTCAAGAGGGTCGCCCCATCTCAATGATTTCCAGAACATTGAAAC  
CCCCGGAGGTGAACTACGCCACCAACGAGCGGGAACTTTTGGCTATAGTTTGGGCCCTTAGCAAGCTACG  
TCACTACCTATATGGAGTAAAAGACATTAACATTTTCACGGACCACCAACCGTTAACTTTTGCCGTTTCTG  
AGTCAAACCCGAACGCCAAAATTAAAAGATGGAAGGCGCGCATTGAGGAAACGAATGCGCGAATATTTT  
ATAAGCCAGGCAAGGAGAATTTAGTCGCTGATGCGCTATCGCGACAACAGCTCAACGCTCTTGACGAGCT  
GAATACTGATTCCCTGCGCAGCCACAGTCCACAGCGAGCTGTCCTCGACCTATACAATTGAGTCGACCGAA  
AAGCCACTTAATTGTTTCCAAAATCAAATTGTCATTGAAGAGGCACGCGTCCCCACCAAACGCAACTTCAT  
TCTTTTCGGGGACAAGAGGCGTCGTGAAGTGGGCTTCACTGATCGCACAGCCCTTCTAGATGAACTCCTTG  
ACTTGATTAATCCAAATGCGGTTAATGCCCTCTATTGCAACCTGCACACACTAGCACAGGTGCAGGATGG  
CTTAGTTCGCATGTTTCCAGGCACAAAGTTCTGGCACTGCAAAAACCGAGTTGCAGATGTCTTCAACGTTG  
ATGAGAGGAGAGAAATTCTCGTTGCCGAACATAATAGAGCGCACAGAGCAGCTCAAGAAAATGTTAAGC  
AAGTGTTATCAGAATACTATTTCCCTAAAATGGCGAAGTTGGCTAAAGAAATTGCGGAAAGTTGTAGAAT  
CTGCTCANCAGCCAAATACGATAGGCACCCGAAAAGACAGGAGCTGGNAGAAACTCCGATCCNTGAGAC  
TCCTGGGGAATTNCTACACATTGATATATTTCCACGGACAAACAATTTTTTTTGNCTGTGTTGATAA  
>160\_rnd-4\_family-321\_\_LINE\_\_CR1  
TAACTGCTATAAAACCGCGCTTTATAACGAGCTGTGTTAACTGTTTCGCGTACAGAGAGAGAGTTCAGTT  
GAGAGTGATTGACGTGTTTTACTTGTGCTCCAAGATTTTTATATATTTTTGCGCTTTTATCCTGCTTTATATT  
TCAAAATTTTGCATTTTTTCGGTGCTTTATTTAAAAGCTTTTATAAACTGTGCAAAGTGTATCTGTTGTGC  
AGCGTGTCTGTTAATTATTACATTTTATAAAACGCGGCGTCAGTTCCGTGTTTGTTGTTATTGGCTGTTTTA  
AGTCTTTTGCCTTTGTGCTCCCCTGTGCATACACTTGTTTGTGCGTGTGTTTCGCTGCATACTTTCTGCTTGTG  
CATCGCGCTCTCGCAAATTTCTTTCTATTGCTTTTCGCACCAAACAATTTGTTTGTGTACGAATAATTGTTT  
TTTGAGTGTTTACTTGTGCACCGTTTTTCGTTTTCGTTTTGCTCTGCGCTCTCGCAAGTTGCTTGCGCATTTAAT  
AATTATGTCGTGCTGTAAGAAACCGTGCACGTTCAAGCAGGCTGACGATTCTGCACTGCCGCAATTTGTTA  
ATTGCTGGCTGTGTGAGAATATGATGCATGCTAAATGTGCAGGTCTCACTGGGCGTGATTGCGACAAGAT  
CGCTGCTATTGCCAAGAAGGGCTGCGGTGGCTTGCGTTGGTCGTGCCCAGAATGCATCGACAAGCAAATT  
GATTTCTCCAGAATGTATAATTCTGTGAGAAGTCAATTCTTAAAATTAATAATGTGGCTAAGCAGCTCTC  
GAGTAATTTTGAAGTTCGANTTGCTAGGCAAATATAAATTTGAGTCCCCAACCAATCGCCGGTTTG  
AGCCTCAACTTTTGAATTGCCCTCTACGTCTGTTTCAGACNCCTACGACTTTCTTGTCTCTTCTAGCAACT  
TGGAGGTATCTCAATGTTGTCTTTATCGCCTTCTCCAAGCGACTGTCCAATTACCCCGGCTTCAAGCCCTG  
TACTAGACCCAGTAGAGCCCGTACCTGATTCCGTCCCAATTAATCAAACCTGCCTCAGCCCCGTGAGCTCCT  
GGCCGCAAAGGTAGACCTGCGCGCAATCTTGCGCAGATTGTTAAAAGCAATCATTGTGCCTCGTTAGCTC

CTCCAACTCCTGTATTACCTACAGCCCCATCAGCGCCTACTTTAACGGTAGTTGCCCTCGTAGGCAAGTT  
TTTGTGTCTCGACTTTCGTCGGACACCACTTCTGAGTCATTGGCAGCCTATATTGCTAGCAAATCTTCTGCT  
AGCGTGTCAATAACTAAATTTAATTTCTCCACCCCTCGTGAAATATCATCATTCAAAATAAATGTTTCACA  
TGATATGTTCCCAATCATTTGTGATCCCAAATTTTGGCCACCACACATGATTGTTTCATGAGTTCAAGCCTA  
AAAAGCGTAACCAGCCTGTCACCCTTCCAGTCCCTTCAATACAGGGTACCATTCTGCCCCAAAAAACTAG  
CTTCATCTTCTGACCAAATCTTTATTCATTATCAGAATGTCAGAGGTCTCACTTCAAAGCTAAAAAATCTTT  
TTATTGCCAGCACTTCCTTCGATTTCGGACATAATAGCATTTCAGAAACATGGTTAAACTCAACCATATCT  
GATTTTGAGATATTACCGAATAACTTTATTTTGTTTAGAAATGATCGGCCGACTCGAGGTGGTGGGGTGT  
AATTGCCGTAAAGCCACTCTCCAGTCTGAACTATTCTGTTTTAGTACGCCTACTGACGCTGAGATTGTCTC  
AGTTAAGGTGTCTTTTCTACACGGAATATCTATGTAACATGCTCTTATGTCCCACCTTCTTCTGATATTCA  
AGTTTATATGAATCATATTACTTGTATTAAAGAAGTTTCTTCACACGTGCGGGATAATGACCTATTATTGG  
TGTGGGTGATTTTAATTTGCCGAACATCTCTTGGTCATTATTCACTGCTGAAAATTATCTAGTGCCCTCAG  
CACAGCACGATTTTTTAGACTGCATGCTTGATCTTTCGTTGTTTCAAATCAATTCAATTTCTAATCATATGA  
ATAGAACACTTGACCTTGTATTTGTTAACGACTACCTTATTTCTAATGTGTCTAGGTACCTCCTTTATCTC  
TTCCTGAGGATGTCTATCATCCAACCTTAGAGATTGCAATGCTAAATTGTAATCCTTCCATTTTCGTGCTCAT  
CAGCCAATAAGCCCCGCTATTGCTTTCGCAAAGGAAATTATTCCTTGCTGAATCAGCTTATTTATTCAACC  
GATTGGTCTTTCTTATATGACTCAGTTGATATGAATACAGCCATTAATTCTTTTTATATCACCTAAACTCC  
CTCTTAGATGTGTGTATTCCTAAGTCAATTCCTTCGACTACTTTTTCAAACCCACCTGGTTTACTCCCAGA  
TTATCACATCTAAAAAATGTAAATCCAAATATTTTAAAAAGTTTAAAAAGTCTGGTTCGTGTACAGACTT  
GGCTAAATATTCCATAGCCAAGTCGAACTTCTTCTTCTTAATTCTCAATGCTATGAGAATTATCTAATTCTG  
TTGTAAAAGGCAATTCGCCCCGAAATCCGAGACAGTTTTATAATTTTGTAACCTTGAAGCGTAAGTCTTCAA  
GTTTGCCATCTTCTTTTTTTCTTGGGATGGATAAAGCTAGCAATGACACTGATTCTGCTAACCTCTTTGCTA  
ATTTTTTCCAATCAACTTACTCTTCAGTCTGTCCTAATACTAATTCTTACCCTTATACTATTTCTCCGCTAG  
TTCTATACCTCCCCCATTATTTACACTCCTCTCTCCTATTAGCTATAAACTCTCTAAAATCTTCTTACTCT  
CCTGGGCGCGACAATATTCCTAGTTGTCTACTCAAGGAGTGCAGTTCTTCCCTTTTCTATCCATTGCTAAAG  
CTTTTTAATCTATCCCTTGAACTTCTGTCTTTCCATCTCTTTGGAAAGAATCTTATATCATTCCCTCTTCACA  
AGAAAGGTGGGAAGTCTGATATACAAAATTACAGGGGCATTGCAAACTGTCTGCTATTCCTAAATTATT  
TGAAAAAATAATCACTTCGAATTTGCAGCATTTCTGCAAAATCAGTTGTTTCCCTGTTCAACATGGATTCTG  
TAAAGAATCGGTCAACTACGACCAATCTGCTTGAGTTTACTTCCTTGGTAAATGATGCTTTCCTTTCGAAA  
ATGCAAACTGATGTCATTTACACTGACTTCAGTAAGGCGTTTGACTCTGTGCACCATGACATTTTACTTTTT  
AACTTGACCGAATAGGTTTCCCTCTGTCCCTTTTACTTTGGATTAATTCTTATTTAAAAGGTAGGACCCAA  
AGAGTAATACTGAGGTTGACTACCTCTAAAAGGGTTCACGTTACTTCTGGTGTTCCTCAAGGTAGTCATCT  
TGGACCTTTACTCTTTACACTTTTTTATAAATGATCTTCCCTCTGTTATATCACATGCCCGTGTACTCATGTAT  
GCGGACGATGTCAAACCTTTTTCTATCATACTAACCCCTACATCATTCTCGTCTACAAGACGATTTGAA  
CGCTATGCAACTTTGGTGTTTCGGCCAATCAATTGCATCTAAATTGTTCAAAGTGTATGTTTATGACTTTTAA  
TCGTACTACACCTTATCTTGTGCTAGTTATACAATCGACAATATCCCTTTGCAACGTATACTAACAGTTAAGG  
ATCTAGGCGTTATTTTTGATTCTAAACTCTGTTTCAATCTTCATATAGATACCATTGTTAATGAGGCAAAAG  
GTGTACTTGGATTCATTAAACGATGGTCTAAAGAGTTTAAACGATCCTTTTATAACAAAACCTTCTGTACATC  
TCTCTTGTTCGCCCTATCCTTGAATACTGCTCTTGCATCTGGTCTCCACAGTATATCAACAGCCAGGATCGT  
ATTGAATCTGTTTCAAGCAATTTCTGCTTTTTTGCCCTACGAGGTTTAAATTGGGACCCTAATCTTCGGTTG  
CCGTCTACTCCAGCAGACTGCTTCTTCTCAACCTTCCGTGTTAATCAACCGTAGGACAATTCTCGGTGTT  
GTCCTTCTACATAAGTTGATTATTGGCGACATTGATTCTCCTTTTCTGCTAGGGCGTCTTCAATTCTCTGTT  
CCGGCTAGACCAACCAGAAATTATCGCCCTTATTACTATCTACGTGCACAACTGATTACGCTATGCACAA  
TTCTTTTCGCGTGCTATGTAAAAATTATAATAGTTTGCATCACGTTTTCTCTACCGAACTGTCTCTACCCCT  
AATAAAATCGTTGCTTTCAGGATACCTTCGGGAAGTCGCTGACCATTCCCAGCTATGAGCAGGGGCATAG  
CTAGCCGGACAGGCTGAAAAATTTCCCCCACCCTGTCGGTGATTTCCTTACTTTTCTCTTTGTCTATC  
CACTTAACACTCTTTATCTAACTTACATTGCTTTACTTTATTAACAATTTTCTTACTTTCTTTTTCTCTATTTA  
TTGTATTTTCTTTATTAATNTAGCAAATTAAGATTATTTTAAATTTCACTTGAGATCACTTTTTTCTCTACTTA  
CAACCTTCTGCTTAGATGTAGGCTCTAATAGCGTCACTGACAAAATTAGCTGTGAAAAGGGGCACAGCTG  
GCCGGACTGGCAAATAAAACACCTCCATCGGTGCGTGATGCTATTTAGAAAATTGTATCCTTTAACTAGGC  
TTTTAGCATATANTTATATTGTACAACCTTTTGAATAATGAGGAAGACACTCGTTTTGTGCGACCATTAAATA  
AATAAATAAATAAAAAATAAATAAAAAAA

>9\_rnd-1\_family-490\_\_Unknown  
CACGCTGGTTCCTCTTTACTTTTAGTGCACTGCTGCTGAGCTGTGTTTATCCCAAACCCTTGACAGCGGAAG

CATTGAGTCAAATCATTCTCTTTTCTTACACCAAGTTCGGTTCAGTACTGGAGTCATCAGATTTCAGATG  
TTTTTGCCATCGCCANTATTATCAGGCGAAGTTTGCCAGTCCATCGTGATGGAAAAAAGGGGGGTCCTG  
GGGCGTGAACGTTACCCAGCTACCCAGTATCAATCAAGACTCGGTTATTTTCTTGTAATTTATTTGTTTGT  
TACGTTATTCTTAATTGNGCACGTACGCGCGGGCGAATGAGTTGGTGAGNACGCGTGCTTCTAGCCAATA  
GGGACGGTTGTTAAACGATTATTTTAATAATTTTAGGAGAATTAATTTTGAGCTCAACGTTAACTCAA  
AATTATTATTATTATCTCTGAAATGAAATGAAAGAGTTATTTGCGCCCCGGGCGATCTCATATGCTAAG  
GGTTCATCCCGTTGCACATTTCTGTTCAAATCTCAGGCATTAATAACTTTCCAGTTATCATGAGGCGGCT  
AAGAAATCCCAGAGGATCGAATGTTGACATGATCAATGCTGAGTCGAACACCAGTCTTATCTTACCGGGC  
TTATTTGGACTTTTAACTCAAAAGTGCGGAAGATACCAAAGTTTGTGCTGTTGGCTAAAGCGACCTTATG  
CTGCTTCAATCGTCGAGCATATCCTTTATGAACATAAACGTCCATAATTTTCATTTAGGCTTGTTTAAACCG  
ATCGTTACGCTTTCTCTTTCTCTCAATGTTGACGAACCTTTTGTATTCCATATCATAGCTTCGTGGCAACTT  
AACATTATCACGGTTCATAATAAACCTGTCTGGTAACGTTCTCCTATTTTCACCATGGTGTCTTCGAGTAC  
CTTCTGTGCTCGTGCATCGTCGCTGGCTTCGACTGGTGGCGAAGTTTTCGATATCAAAATAGTCGTTTACC  
ATCTTTTGGATTGCATCCTCCTGCGACACTGCTAGGAGGCATGTTTTTGATGACGTTGCCGTGCGTTGACTT  
CTTACCAGTCCAAAACCCCATCCAAGTTCGGAGGCTGCGGCATATGGTCCCTGTGGTGCNAATATTTTT  
GTTTGCATTGGCAGTTCAAGATGTGCGTGGTCAAGTCCAATCAGAAGTTTGGTTCCGCACCGCGATACGG  
TTTCATTGGAAGTCGTGCGCCGTTGCCCGACATTTGGACNTGACGTCGATGCAGGCTTTGCATTGGTAAGC  
TCAGGTTGGACACAGCGTACACATTTCGCAATACATGACGCTTGCGTTTGTACCCGTCAAGGAGCGCGTA  
CGTATCGGTCAGCTTATTGGCCCCGTGCAACGTCCTGGCAATATGCGGAAAAGTCGGCGTTCTCTATCCG  
AATCGACACAACCTTAAGTTCCTTTGTCAATTGAGTCAATTGAGCATCCACTGACTGCGGTGCCNTTGTGTG  
AGGATCCGCTGGCTGCGGCATCCGTCCAGTACTCATCACTGTATCACCTGCTTGATGCGGTGCATTGTGAC  
TCATGGCATCATCATATAAATCATAAATGTGGCACATAATTATTGTCCATATGAGTTAGTTTTGGTAAGA  
CTAGTAATCTGCCGAAATACTTAGATACCATAGGTAATATAGAACCTAAATAGAACATAGAAGATTTTCGC  
NAAAGAAGGTAAGTGTTGATTAGAAGTAGCATACCAAAGAGCAAAAAACATGCTTGAACCTACGCAAAACA  
AAAAAATAAAGAGCTATATGACTTAAACTAAGGACATAATTTTATTTCAGGGGAGATAAAGTTTTACTAA  
GTGTCGCGTGCCAAACGAAGGTGCAGTTGCTATTTGAACACTGCAAGGCCCGGCCATGTTACTCCGAT  
GTTAATAAAGANAGCGTAATGCAATACGTGCTAGTGCAGTCGGATTCTGAACGGATTACATAGGTTAAAA  
CATAGATATAAATATTCCCTTAGAATCTTACCGCAGTCTTGCCCTCAAAGGCCTTCGAACTCACGACAATA  
ATGAGCTTAACCTTGTAATGTANTTAATACTAAACGATCGATAACTTAATTCGTCCCGCAACATCTCCGCC  
CCCGTGAAGGTCTGCTTCAAACACATTCAGTATGGCTAGTTAGCCACAGGACGAGTGATCAGTCGTACT  
CGATTGTTGTCCGCCACGCGCACGCTGGTGCCTGGTCCAGGGTAGAGCTCCTCCACTATGCCCTTCGCCA  
CTCTCTGCGCGGCACGGCCGGGTGCGATACAAACACCATATCACCATGGCGTATCGGTTCAACGCGCGCA  
GGCAGGTACTCTAAGACCCACCGCTTCCAAAAACGGTCTCGTAACAGACGCGCCGTGTCCCACTGTTTCT  
CGTGGCCCCGTCTCTCGTTCCGGCTGTAAGTGGGTGTGTCAGGCAGATTGGCCACTTCTTTGAGTAGATCGTT  
CGGTGTTAGGGGTTTTCTGTTCCGGTAAGTGGGTAAAGCGGGCGAGAATCCACAACGCTCTCGGCCTCAA  
TCAGGAACTCTCCAGTACGTGTTGGTTTGGTGCCACCTCCCTTACTGTGTGGCGTAGCACTCTCTTGACA  
CACTGCACCATCNTTTCCCAAGCGCCCCCTTCAGCTGGGTTCGCTGGGCAATTGGAGATCCAATCAATGCC  
TTTAGATAGCTCGCCCTGAATCTTCTCCGCCTCGAATACGTCTATGAGCCTTTTGGCTTCTCTGTGCGGCTCC  
AACAAAGTNATTTCCGTTGTCACTGCGCAACCTCAGTACAGGTCCGCGACGGCAAAGAAAATTCCCGATC  
GCGATTATGCAGGAATTAGTTGACAGATTATGTGCAAATGTATGGCCCTTGTTGTGTCAGGCATGTAAGCAA  
GGCGACCATCTCTTTTCTTTTCGACGTCCGATTGTGACAAAGGAGTGGTCCAAAATAGTCCAAATGGCCTC  
CAGTCGGTCTCTGGCAGATGACCCATTATAGGTGCCCTGGCTGCGCTCTATATACTATGAATATTACTG  
TACGCAACAGTCGACGACGCTTTGTTATCCAAAATCTGGTCTGATGTGCGCTATCGTTGCATCCATGTAT  
TGATGCTTCATTTTACATGGTAGTGATACACAATCGGTTTTGTGTCAGTGCGAGCCGGTGTGACAGGATTAT  
TGGCCTACACTGTAGGGCGTATACGCGCATTTGGTATACACTGCAAGGCGCCAGCCCTCTTATGTCTCTTCG  
ATGACCGACTGATTCTTCATTGTATGAGGCTCGAACCTCGTCAGGCAACGCTTCGCATTGCGCTCNCCGTA  
CCAGCAAGTTCTCAGCATTCTCACACTCCGTAGCGGTGAAGCCGAATCTTTCAAGCTCAGTCATCTGTCCA  
CGGCTCCAACGCGTGAACCTTTAAACCCAAAGCCGTCGTCCTTACCAGCCGACTGAAGCTAGAGAATCTCT  
GATTTTAAGCATTATGCAGTAGACCGGGCTGCCATACCCTATCAAAGGCTTGCTTGACAGCACAGCAGTA  
CTTATTCTCTTCGAATGCCTGCATTATTCGCTCTACTATCCTATGACACTGTTGCGGTGTTCCGTGGATGCG  
CCTGAAGCCGAACCTGATGGTCTGGGATCAAACCTAGCCTCGTTCAATACTGGCAGCACTATAGAGTAAATA  
AACTCTTTCAATTCAATTTAGAGAGAGTAGCCAGTAAGCTTATGCAAATGTCCAATCTCAAGGCATCGAATA  
ATTACGTTGGTCAGTAACCTGGATACTATTATTAGCTCCACACTTGGTAGCTCCAATAAAGGATAGNGTNNG  
CTTTGTCCGTCAATGAGCAGCGATCAAACGGCATGAATGAGTCTTAAAGGGGCCCTTTGCAAAGGCATCTG

CTCTTTCTTGGTCTGATCGGTACCAGTCCCCATTTGCTTTTCGAACAACAGCTGCCCTTCTAATAGGCCATT  
TAATATGGCGTGTGACCTGCCATAAGCGATTTGGCGGGTCTCTGCCATTTAATATGGCGTGTGACCTGCCA  
AAAGCGATTTGATGGGTNTCCTNGTTTGAAATCCTCGAGGAACCTCGACGCTTTTTTCTCGACCGGGTATT  
GACATGTAATGTTACAGCGGTGTGGTCGGAGAATAAGTTCTCCTTCTATTTTATTGAAAGCTATACCTTTG  
GAGATAGCAATGTATGTAGCAGTATGTCAGGGACCTTGCGCAGATTTCGTGGGCCAGTATGTGGGTTACCC  
AGGTGAGTGGCAGCAAAGTCCTTTCTTCCGTCCCTTCTTCTGTATGCAACGGAGCTTGGCCCTGGGGATGT  
TGGTACGCGAGCCCTACCAGTAGTGTTTGGCATTGAAATCGCCACCAATTATAAACCAGGAGACAAGGCT  
ACCTGGGTGGGAGATACGCAGCCGCGATTGTAAAAGGTCGCCGAGTGGGCTGGGCAGCCTGACCCGGCC  
GCACTCCACTCAATCTTGGTATGCTGGCAGTTCAATATAATTTTTATTCTTGTTTGATGAGCACTGCAGCTC  
CACCACAGGCTCTACCGTTTGGGTGGTTTCTGTAAATAATATCAAAACCTTTGATGGAGAACTACGATCTT  
TGGGAGAAGAGAGTTTCTGATATAAGGAGTATATCTGTGTTGGTGGTCTTCACAAAGTTTTTAACCTCTGG  
CCTGCTATTGCGCAGGCATTCCAGATGGTGAGGTTAAGCCTTACTTGCATAGGCTACCAACAAAAATGGC  
TAGCACTTGCGTCATCTGGCTAAATAATTTCTTCATCATTTTTCCATCATCTACTCCAATCGAGTAACCA  
>9\_rnd-4\_family-428\_\_LINE\_\_CR1  
AGAGAGGAGAGTTCTCAGTTGAGAGTGATTGACGTGTTTTACTTGTGCTCCAAGATTTTTATATATTTTTG  
CGTTTTATCCTGCTTNTATTTCAAAAATTTTGCATTTTTTCGGTGCTTTATTTAAAAAGCTTTTATAAACTG  
TGCAAAGTGTCATCTGTTGTGCAGCGTGTCTGTTAATTATTACATTTTATAAAACGCGGCGTCAGTTCCGT  
GTTTGTGTTATTGGCTGTTTTAAGTCTTTTGCCTTTGTGCTCCCCTGTGCATACACTTGTGTGTGCGTGTGT  
TCGCTGCATACCTTTCTGCTTGTGCATCGCGCTCTCACAAATTTCTTTCTATTGCTTTTCGCACCAACAATT  
TGTTTGTGTACGAATAATTGTTTTTGAGTGTTTACTTGTGCACCGTTTTTCGTTTCGTTTTGCTCTGCGCTCTC  
GCAAGTTGCTTGTGCATTTAATAATTATGTCGTGCTGTAAGAAACCGTGCACGTTCAAGCAGGCTGACGAT  
TCTGCACTGCCGCAATTTGTTAATTGCTGGCTGTGTGAGAATATGATGCATGCTAAATGTGCAGGTCTCAC  
TGGGCGTGATTGCGACAAGATCGCTGCTATTGCCAAGAAGGGCTGCGGTGGCTTGC GTTGGTCGTGCCCA  
GAATGCATCGACAAGCAAATTGATTTCTCCAGAATGTATAATTCTGTGAGAAGTCAATTCTTAAAATTA  
TAATGTGGCTAAGCAGCTCTCGAGTAATTTTGA CTGAGTTTCGAGTTGCTAGGCAAATATAAATTTGAGT  
CCCCAACCAATCGCCGGTTGGAGCCTCAACTTTTGCAATTGCCCTCTACGTCTGTTTCAAGACACCTACGACT  
TTCTTGTCTCTTCTAGCAACTTGGAGGTATCTCCAATGTTGTCTTTATCGCCTTCTCCAAGCGACTGTCCA  
ATTACCCCGGCTTCAAGCCCTGTACTAGACCCAGTAGAGCCCGTACCTGATTCCGTCCCAATTAATCAAAC  
TGCCTCAGCCCCGTCAGCTCCTGGCCGCAAAGGTAGACCTGCGCGCAATCTTGCGCAGATTGTTAAAAGC  
AATCATTGTGCCTCGTTAGCTCCTCCA ACTCCTGTATTACCTACAGCCCCATCAGCGCCTACTTTAACGGTA  
GTTGCCCTCGTAGGCAAGTTTTTGTGTCTCGACTTTCGTGCGACACCACTTCTGAGTCATTGGCAGCCTAT  
ATTGCTAGCAAATCTTCTGCTAGCGTGTCAATAACTAAATTTAATTTCTCCACCCCTCGTGAAATATCATC  
ATTCAAAATAAATGTTTCACATGATATGTTCCCAATCATTTGTGATCCCAAATTTTGGCCACCACACATGA  
TTGTTTATGAGTTCAAGCCTAAAAAGCGTAACCAGCCTGTCACCTTCCAGTCCCTTCAATACAGGGTACC  
ATTTCTGCCCCAAAACTAGCTTCATCTTCTGACCAAATCTTTATTCATTATCAGAATGTCAGAGGTCTCAC  
TTCAAAGCTAAAAATCTTTTTATTGCCAGCACTTCCTTCGATTTCGGACATAATAGCATTTTCAGAAACATG  
GTAAACTCAACCATATCTGATTTTGAGATATTACCGAATAACTTTATTTTGTTTAGAAATGATCGGCCGA  
CTCGAGGTGGTGGGGTGTAAATTGCCGTTAAAGCCACTCTCCAGTCTGAACTATTCTGTTTTAGTACGCCT  
ACTGACGCTGAGATTGTCTCAGTTAAGGTGTCTTTTTCTACACGGAATATCTATGTAACATGCTCTTATGT  
CCCACCTTCTTCTGATATTCAAGTTTATATGAATCATATTACTTGTATTAAAGAAGTTTCTTCACACGTGCG  
GGATAATGACCTATTATTGGTGTGGGGTGAATTTAATTTGCCGAACATCTCTGGTCATTATTCAGTGTCTGA  
AAATTATCTAGTGCCCTCAGCACAGCACGATTTTGTAGACTGCATGCTTGATCTTTCGTTGTTTCAAATCAAT  
TCAATTTCTAATCATATGAATAGAACACTTGACCTTGTATTTGTAAACGACTACCTTATTTCTAATGTGTCT  
AGGTCACCTCCTTTATCTCTTCTGAGGATGTCTATCATCCA ACTTTTAGAGATTGCAATGCTAAATTGTAA  
TCCTTCCATTTTCGTGCTCATCAGCCAATAAGCCCCGCTATTGCTTTCGCAAAGGAAATTATTCCTTGCTGAA  
TCAGCTTATTTATTCAACCGATTGGTCTTTCTTATATGACTCAGTTGATATGAATACAGCCATTAATTTTTT  
TATATCACCTAAACTCCCTCTTAGATGTGTGATTCCCTAAGTCAATTCCTTCGACTACTTTTTCAAACCA  
CCCTGGTTTACTCCCAGATTATCACATCTAAAAAAATGTAAAATCCAAATATTTTAAAAAGTTTAAAAAGT  
CTGGTTCGTGTACAGACTTGGCTAAATATTCCATAGCCAAGTCGAACTTCTTTTCTTCTTAATTCTCAATGC  
TATGAGAATTATCTAATTCGTTGTAAAAGGCAATTCGCCCCGAAATCCGAGACAGTTTTATAATTTGTAAA  
CTTGAAGCGTAAGTCTTCAAGTTTGCCATCTTCTTTTTTTCTTGGGATGGATAAAGCTAGCAATGACACTG  
ATTCTGCTAACCTCTTTGCTAATTTTTTCCAATCAACTTACTCTTCAGTCTGTCCTAATACTAATTCTTACCC  
TTATACTATTTCCCTCCGCTAGTTCTATACCTCCCCCATTAATTTACACTCCTCTCTCCTATTAGCTATAAAC  
TCTCTAAAATCTTCTTACTCTCCTGGGCCGGACAATATTCCTAGTTGTCTACTCAAGGAGTGTAGTTCTTCC

CTTTTCTATCCATTGCTAAAGCTTTTTAATCTATCCCTTGAAACTTCTGTCTTTTCCATCTCTTTTGGAAGA  
ATCTTATATCATTCCCTCCTTCACAAGAAAGGTGGGAAGTCTGATATACAAAAATTACAGGGGGCATTGCAA  
AACTGTCTGCTATTCCCTAAATTATTTGGAAAAATAATCACTTCGAATTTGCAGCATTTCTGCAAATCAGTT  
GTTTCCCCTGTTCAACATGGATTTCGTAAAGAATCGGTCAACTACGACCAATCTGCTTGAGTTTACTTCCTT  
GGTAAATGATGCTTTCCCTTTCGAAAATGCAAACCTGATGTCATTTACACTGACTTCAGTAAGGCGTTTGACT  
CTGTGCACCATGACATTTTACTTTTTAACTTGACCGAATAGGTTTCCCTCTGTCCCTTTTTTACTTTGGATT  
AATTCTTATTTAAAAGGTAGGGACCCAAAGAGTAATACTGAGGTTGACTACCTCTAAAAGGGTTACAGTT  
ACTTCTGGTGTTCCTCAAGGTAGTCATCTTGGACCTTTACTCTTTTACACTTTTTATAAATGATCTTCCCTCT  
GTTATATCACATGCCCGTGTACTCATGTATGCGGACGATGTCAAACCTTTTTCTATCATATACACTAACCCC  
CTACATCATTCTCGTCTACAAGACGATTTGAACGCTATGCAACTTTGGTGTTTCGGCCAATCAATTGCATCT  
AAATTGTTCAAAGTGTATGTTTATGACTTTTAATCGTACTACACCTTATCTTGTGAGTTATACAATCGACAA  
TATCCCTTTGCAACGTATACTAACAGTTAAGGATCTAGGCGTTATTTTTGATTCTAAACTCTGTTTCAATCT  
TCATATAGATACCATTTGTTAATGAGGCAAAAGGTGTACTTGGATTCATTAAACGATGGTCTAAAGAGTTTA  
ACGATCCTTTTATAACAAAACCTTCTGTACATCTCTCTTGTTCGCCCTATCCTTGAATACTGCTCTTGCATCT  
GGTCTCCACAGTATATCAACAGCCAGGATCGTATTGAATCTGTTCAGAAGCAATTTCTGCTTTTTTGCCCTTA  
CGAGGTTTAAATTGGGACCCTAATCTTCGGTTGCCGTCCTACTCCAGCAGACTGCTTCTTCTCAACCTTCCG  
TCGTTAATCAACCGTAGGACAATTCTCGGTGTTGTCCTTCTACATAAGTTGATTATTGGCGACATTGATTCT  
CCTTTTCTGCTAGGGCGTCTTCAATTCTCTGTTCCGGCTAGACCAACCAGAAATTATCGCCCCTTATTACTA  
TCTACGTGCACAACTGATTACGCTATGCACAATTCTTTTCGCGTGCTATGTAAAAATTATAATAGTTTGCA  
TCACGTTTTCTCTACCGAACTGTCTCTACCCCTAATAAAATCGTTGCTTTCAGGATACCTTCGGGAAGTCGC  
TGACCATTCCCAGCTATGAGCAGGGGCATAGCTAGCCGGACAGGCTGAAAATTTTCCCCACCGTGTCCGGT  
GATTTCCCATTACTTTTCTCTTTGTCTTATCCACTTAACACTCTTTATCTAACTTACATTGCTTTACTTTATT  
AACAAATTTTCTTACTTTCTTTTTTCTTATTTATTGTATTTTCTTTATTAATATAGCAAATTAAGATTATTTTT  
AATTTCACTTGAGATCACTTTTTTCTTACTTACAACCTTCTGCTTAGATGTAGGCTCTAATAGCGTCACTGA  
CAAAATTAGCTGTGAAAAGGGGACAGCTGGCCGGACTGGCAAATAAAACACCTCCATCGGTGCGTGAT  
GCTATTTAGAAAATTGTATCCTTTAACTAGGCTTTTAGCATATAATTATATTGTACAATCTTTTGAATAATG  
AGGAAGACACTCGTTTTGTGCGACCATTAATAAATAAATAAATAAATAAATAAATAAATAAATAAATAAAT

>Ref\_dvir\_495

GTTTCATTGAGCTTCCCTTAAATTCGATTACTAATCCATTTTGTTTTTGTGCGGTTGGGGTCGAAACCTTTTT  
TGTCGATGACCCAAGAAGGGCTGTTGTATGGCGATTTGGATGGTCCAATTATACCATCTTTTAGCAATTGT  
TTGATTTTGAAGTTTACGAAATCTGAAACTCCCATAGGGTGCGGGTATAGTTTTGAATACACCGGCTCGTT  
GTCTGTGGTTCGAATAGTGGCAATGACAGAAGTGTTGAAAGGAAGTGCCTCGTTAGAGGTGCAAAATGCC  
AAAGTCAAGTTTCAGCCATCCTCGGTCACCTTATAGCTACTGATGATCCTTTTACCTTTCTCGAAGTCTGC  
CATTACAACCTAGCCAGATGATGATGAGCTGCTGATGGTAATGCTGAGAGCGGCGTCGACTGTGGCCAGGT  
GCTTGGATGTTTCTGTGGTGCCAACTCATTTTTTAAGTTGTTGATGACATGGAGATTATGGTTATATGTTGA  
GTGGAGGTGACCCCATGATGCCTGGTGCCTTCCCTATGATCTCGCGCTTATTCGCATATTTTGTGCCATTGA  
TGGTAGCGGAGAAATGGAAGGTGACGAGGTGGGTTCCGTTTGTTACGACCCCTGGGCCATCGTCAGTGCT  
CACTTTAGCTGTGCTTCCGTTGATCATGATGACATTACCGTCTATTAATGCGACTGGTTCGAGGTGGCTCG  
GTTGTGTTTCAGCAAGAGGACGTGCTGCCCGTATAATCCTCGTGACAGAAAGTCGTGTGAATTATACCCTAG  
GATAGGCTATTAATATGTGGACTATATTTTCGGACTGGAGGACCTTAATTTAGACGCTTCTGTAATGCTAA  
CTATGGGGACTTCTACTGGGTGTTTCAATTAATAAGTTTAAATCATTATGTTCAAAAATAGTTGGATAT  
ATTATATTGGCTTTAGCTAATGTAATTATGAGAATTAGATTCGATATTTGATTATTAATATTCTATTTCTC  
GCTAATATTGTTTCATATAAATGCGGTGTGTCCACTAACTATTCTTTTTTGCTTTAGTATTTTATTTACTG  
GTCAGTTAGTTTGTGACTTGCCTTTGCATCTCTGAGTTGATAATCAATTGCCTATTGCATTGATTAATTGG  
GATTCGGCCATCTAATCTTTTTGAAGTCGATCTAATAATTTCCGCATGTGAGATTGTGGGAATAGCTCTAT  
TAGTTTTTTCGGCTTAATCTGCAATGGCATTAAATTCCGTCAGGTTACTTGAATGCCTCAAGTAGTCCCTCTG  
TTCCCATACCAATACCATTCCGTCTATTATCGGAATATAATTGGAATGCGAATAGTCGATAATCCGATTCT  
GTACTAAACCTAGCATTAACAAGATTGCAGATTAAATCCTGTAAAAAATAACAGATAAGGTTTGTGCGG  
TTAGTAATATGAACTTAGCTGCTAGCTCTTATTCTAACTGATTTTTCTGACTGCTACCTTAGATTGTCTTAT  
GGACCACCCTCCCTTTAATGAGGGCGAAAATTTGTGCATGAGAATCTAGTGAAGTGTGTAAGGACCAGAG  
GCTATAAAAACCTTTTCGGTTAAAGAGGCAGGTGTATTAGCTTGTATATTGTTGGCTATAATGTTTAAGTT  
TTCCGTTTCAGGGAAAATCGCTTTTTTCCACTACCGATAACGTATGTGGACCTGAGAAAAAAAATTGAATTTG  
ATTGTTAAAGAGGCGGCTGTCTTATGAACAATTCTTACCCTAATGAGGACCGTTGTCCCCAGATCTGCCT  
CGACTTTATTTTCAATATAGAGGGGCGATAGCTTGTTCCTCAATCTGCGGTTCTGCTTTACCAGAACCTATT

CGCCCACTTCAAAAAGCCCTATACTGTCTGGCTGCATTACATCTTTCAAGTACAGCTTGCTGCACCTTTTCAG  
TTGTGGCATGTATGACATCCGGCGGTTTTTGGTTCGTGACCGAGTGGTTTGACCTGTTATACTCCATAATA  
CTCCTCATAATTAAGCTTAACTGTATCGCTGGCTTTCTTATCCATTTTTAGGCTTCGAGCTATGTCCGTCAA  
GGGTGCTATGATAATCTTTCTACCTGACCATTGGAAACCGCTATGTAACGGTGGCGAGTTAAACGATGTGT  
ATGTCGTAGTTATTTTTTCAGAAGTGACACTATTGTTTCAGAATTGAATGCTGCTTCGTTATCGCAGAATATC  
GTTTTTCGATTTAGGGATTAATTCAGCTGATTTAAAGTCAATTTTTTGTGTGACGGGATTGGTTTGACGAC  
AGCGAATTTAGAGAATTTGTCTACACAAGTAAGGAAAAAACTTCTTATCGGAGGAAAAATGGAAAAATGTCCA  
TATGCAACATTTCCGCTAGCATATGAAGGTATTGGTGAGACTCCAAAAGTGTTTGTTTTTGTGGATACTTA  
TCATATTTTTGTTTTTGTGCATATTTTTTGCAATTTCTGACAACACTACATTTGCCAAATTATTCATTTTGGGAAA  
AATAGTAGTCACGAATTTGCTTAACATTTTCCTGTGCGGCTCTGTGCGCTCGGTTATGTTCTGTCTGTAACGA  
TTTCCATTTTGATCGTTTTTGTCAATTAATATCTGACACATAGTTCTTCCAATGCCACAATAAGGTGGCTGG  
GAAGTTTAACTCGAGTTCGTGTTGAAAGCTAGCGAGCGTTGGAAGATCGTAGTGAATTACGTTGAACAGT  
GAAGCTTTGTCCACGAAGCTAATGATGTGGCGAATTTTTTTGCCGAAGGTTATCATTTTCCTTTGCAGTGG  
AAAACGTGCCTTTTCTAAGACAATTTGGGTTTAAAGCATTTTAAATGGCTTGTGAGTTGCCTCTATCGTGTA  
GGTTAACGAGGTCTCCCTGTGAATGGTTGCACCGTCGATAAAGGCTCATCTTGCAGTGCCTTCACATTTTG  
TCTGGATAGGGCATCGGCCACAAAATTTTCCTTGGCGTTGTGTTCTGTCAATGAATACTTTCCATCTTTTGAT  
TTTTGCATTTGTATTTCTGTGAGAGACAGCGAAAGTAAGGTGCAGATGTTCCGGTGAATATATTTGTCCCAT  
ATAGATAATTTTGTAACCTAACTATGGCCAGCAACTCTCGTTCATTTGTAGCGTAATGAGATTCGCCATCT  
TTGAGGGTTCTGGAAATCATAGTTATTGGCCTACCATCTTGAGACAAAACGGCACCGATGCCGTCCATAG  
AAGAGTCAGTGGTCAAATCAAAGCATATTTAAAGTCCGGGTACATGAGGATTACATCTTCAGATGCCAAA  
ATACTCAAGGTTTCGAAAGCATTGCGTTGCGTTTCATCGAACTCAACTGAGATTTTTTTGGACATGTGTCT  
ACTCACGGAGCCGTTTTCTCCTTTGAGAATGTTGGTCAGTGGCCTAGCTATTGCTGCAAAATCTTTAATAA  
AGCCTCTATAAATAGTTGGCTAGACCAAGAAATGATCACAGGCAAGTTTTTTGGCTCAGGGCATTCTCTGC  
ATGGCTTTCACCTTTTCAGGGTCGGTTCTGGCCCCGTTTTATGTTACTACGAATCCCAGAACTCGACGCTT  
TCTTTGAAAAACTTTGTCTTTTCTTGAGCAACACACATGTTAGCATTGCACAGACATTCCAACACCGGGCT  
TATGTTCCGGACATGATCAAAACTTCCCTGTGTGTTCTTCCCTATGTGTTCTCTGAGGACATCTTCGATGGC  
CCTTTGAAAAATGCTTCCCGCATTTTTTCAGTCCGAAAGGCAATCGGCAGAACTCGTATTTTCCCCCATGA  
CCGAGAACGAGATTTTTTCGCGAATTTGTTCTGCTAAATAAATTTGGTGGTAACCCGATTTTAAGTCGAGG  
GTCGTGAAAAACTTTGCCTGTCCCAGATCATGGGAATACTCGGCATTGGGTATCGATCGGCTATAGTTCGT  
TCATTGAGCTTCCTTAATTCGATTACTAATCATTTGTTTTTGTGCGGTTGGGGTCGAAACCTTTTTTGTCTG  
ATGACCCAAGAAGGGCTGTTGTATGGCGATTTGGATGGTCCAATTATACCATCTTTTAGCAATTGTTTGAT  
TTTGAAGTTTACGAAATCTGAAACTCCCATAGGGTGCGGGTATAGTTTTGAATACACCGGCTCGTTGTCTG  
TGGTTTGAATAGTGGCAATGACAGAAGTGTTGAAAGGAAGTGCCTCGTTAGAGGTGCAAAATGCCAAATG  
TCAAGTTTCAGCCATCCTCGGTCACCTTATAGCTACTGATGATCCTTTTCACCTTCTCGAAGTCTGCCATT  
ACAACCTAGCCAGATGATGATGAGCTGCTGATGGTAATGCTGAGAGCGGCGCCGACTGTGGCCAGGTGCTT  
GGATGTTTCTGTGGATGCCAACTCATTTTTTAAGTTGTTGATGACATGGAGATTATGGTTATTGATCCTGTG  
GAGTTATGATTTATGATGTTGAGTAGAGGTGACCCATGATGCCTGGTGCCTTCCTATGATCTCGCGCTTAT  
TCGTATTTTGTGCCATTGCTATTAATGCGACTGGTTCGAGGTGGCTCGGTTGTGTTTCAGCACGAGGTCTGTG  
CTGCCATCGTATAATCGTCGTGCACAGTAGTCGTGTGCTGCGAGCTTACAATCAGAGGCGTAGGTTGTTTA  
CACGCACTCGTTGACTGCTAGTTGCAATCGGCTACGGTGTGTTGTCTTGTATTTGTAGTGCGACATGTTGGTG  
GGTCACGGGATAGATAGTAATCTTCTTGAGATGAATTATACCCTAGGATAGGC

>160\_rnd-1\_family-112\_\_LTR\_\_Gypsy

GTGCCTCAATAAAAGTGCATATTATCAAACAAACAAAAATAAAACATGTTTCGAGTTCTAGTGGAATCAT  
ATAACAAAGTCCTTGACATTGTAAACAACAATGAACGTAGGTTAAGCGATTTACATTTAACACAATCAAT  
TGACGTGTTAAAAAGCCTGCGTGAAAATATTAGACATATTTTCGAAAGACATAATTTTCAAATATTTGTTT  
CAAATGCGCTAAATACACCAGCAACATTTCGAAATCACTGATTTTCATGGTATCAGTAGAAGAGTAACTCTG  
ACAAAAGACCAAANAACAGATACGAAATTAGTCGACATGGCNCAAACACCNGTAGAATTTCTCAAGCTA  
GCCTCATCTCTGATACCAGAGTTTGACGGCAAGGCGGAAAAATTTAAAAAGCTTCATAGATGCTCTGAATC  
TGGTAGANTCTCTAAAAGGAACACACGAAGCACTTGCCGTAAGTCTTATTAAGACAAAACCTAAAAGGCCA  
TGCCAGGAACCTGATAAGTGATGAGAACAACACTATTGCAGCNCTCATATCGAAACTATCGGACGAAGTAAAA  
GGAGAGTCGGTAGAAGTTGTNTCTGCTAAGCTTCTAACTTACAACAAAAGAGCAAAACGGCCAACCAAT  
ACACCCAAGAGGTGGAAAAACGCAAAGGCCCTTGAAGGNGCCTATATCAGTGAAGGTCTAAGCCAAACA  
NTTACAGCACTACAACAGCCGTAAAAGCTATGACCCAAAATTGTTTCGATTGATAAGGTAAAACCTTATCAT  
GCAGGCAGGCACATTCACAAATATGAATGATGCCGTCTCCAAATTTGTCAATAGTTGCACGGAGGTAACA



GGTCAAAGTAACACTGTCCTGTATTATCGACGAGGTGNAAGCCGNAATAACAGACGAGGCCGAAGTTATA  
ATCGTGGCAAAAATCGCGGCAACAGCAATTGCAACCGCGGGCGGTAATAACAACAATAACAATGGCAATA  
ACCGTGGAGGCAAGAGGAGGCAACAATTCGAACCGAGGCGGNAACCACAACCAAAACAGTAACAATAG  
AAACAATGTNAGAGTGGCNCAAGATACGTGCGAAAACTCTCAGAACCCCTCAGATATTCAACAGCCAGTA  
AATGCAAAGGTTTCATNCCATCAATCTCAGTCTTAATATATTTGTCACCTTTTTATAATCANNCAACTGAAAA  
TAACTCGCATTCCTAATAGATACTGGTGCAGATATNTCACTNTTAAAAGAAAATTTCAGATATATTTCAA  
ATNCAAGAAGANAAAATTATAAACATCCAAGGCATNGGCCAAGGCGTAATANANTCNAAAGGANTAACT  
TCAATAGAACTTCAACCNACAAGCAAATATATAATTCCACACGANTTTTCATTTAGTAGATTTCGGATTTTNC  
AATACCGTGTGATGGAATAATAGGCATTGATTTTTATTAAAAAATTCAATTGCCAATTAGATTTCAAACCAA  
GTGAAGACTGGCTTATAATTAGACCCCAAACTTAAATTATCCAATTTATGTTCCAATAACATATAGTTCT  
GGCAACAATGCCACAGTTCTGCCAGCCAGATCCCAAGTAGTCCGAAAAATACACATTAATTCAGTAAANG  
ATNATATATTTGTTCCAAATCAAGAAATNCATGATGGAATTTACGTTGCAAACACAATAGCAGCATCCAA  
ACATGCATACGTTGCTTCTAAACACAATAATNTCGACCAATTGGTCAANGTAAACAAAATCNAATAT  
GAAAATTTAACAGATTACGACATTCATAAACTAATCCAGAAAAATAGAAGNGAACAAGTACTTTCAAAT  
TAAAGAAAAATTTTCCACNACAATTCAAAAATCAATTAACAGANTTATGCACCAAGTATAGTGACGTGTT  
CGGACTGGAAACCGAACCGATAGCGACAAATAATTTTTACAAACAAANACTAAGACTNAAGGATGATGA  
ACCCATTTATATNAAAACTACAGAAGCCCGCATAGCCAAGTNNAAGAAATTCAAAAACAAGTAGGGAA  
ATTAATAAACGACAAAATCGTCGAACCGTCTGTATCCGAGTATAACAGCCCACTCTTGCTAGTTCCGAAA  
AAATCATTNCCAGATTCGGAAGAAAAGAAATGGCGATTAGTAATTGACTATCGCCAAATCAACAAAAAA  
CTACTNTCCGATAAATTTCCGCTCCCAGAATTGATGATATTCTAGACCAACTGGGCAGAGCNAAATACTT  
TTCATGCCTTGACTTAATGTCAGGCTTCCACCAAATTGAACTCGAAGAAAGTTCAAGAAATATAACGTCTT  
TTTCAACGAGCAATGGCTCGTATCGCTTCACGCGATTACCATTTGGTCTNAAAATAGCGCCAAATTCATTT  
CAGAGAATGATGACTATAGCATTCTCGGGTTTAGAACCCCTCTCAGGCATTCCTTTATATGGATGACTTAAT  
GGTGATAGGNTGTTCCGAAAAACACATGATTAAAACTTAACTGATGTTTTTCGACGNATGTAGGAAATAC  
AACCTAAAGTTGCATCCAGAAAAATGTTTCAATTTTTTCATGCATGAAGTGACATTTTTTGGGTCACAAATGCAC  
TGACAAAGGAGTATTGCCAGACGACAAGAAATNCGACGTCATCAAAAATTACCCNGTCCCNACGATGC  
GGACAGCGCGAGACGATTCGTAGCATTCTGCAATTATTATCGNCGNTTTATAAAAACTTCGCCGACTATT  
CACGGCACATAACNAGATTATGTAAAAAGAATGTTCTTTTGAATGGNCANNTGAATGCCAAAACGCATT  
CCAATACCTCAAAGAAAACTTATGNACCCNACNTTATTACAATATCCTGATTTCCGCAAAGAATTTTGCA  
TNATAACAGATGCNAGTAAACAAGCNTGCGGAGCGGTTCTAACTCAGAACCGTGACGGANTCCAACCTCCC  
AATTGCNTACGCATCNCGNTCNTTTACNAAAGGGGAAAGCAATAAGAGCACAACAGAACAGAGTTAGC  
GGCAATTCATTGGGCAATNACCCATTTTAGACCATATATTTATGGCAAACACTTTACTGTAAAACGGATC  
ACAGACCATTGACATATCTNTTTTCNATGACNAATCCNAGCTCGAAATTAACNCGCATGNGGCTAGAGCT  
NGAAGAATACGACTTCACGGTAGAATACCTAAAGGGNAAAGATAATTTTCGTAGCAGACGCGTTNTCGNG  
NATAACCATNAAAGAGCTNAAAGATATGCAACATAAAGTCCTGAAAGTCACTACCAGGCGACAAAGTAG  
ACAAAAAANNCTGCGCAGNAGAAAATTATGAANTTCTGCCAAGGCAAAGTCTATAGAAAANGCNTCNAA  
GCCCAACGTACATGAAGTCATTAACAATGACGAAGTACGAAAAGTAGTGACCTTGCGCGTAACAGAATAC  
TAAATGTTTATTTAAACATGGNAANAAAATTACCGCAAGAATCGANGTTAGCGATTTATATACCAATGGA  
ATCCTCGACTTAGGTCAATTCTTCCAAAGGCTCGAAACGGAAGCCGGTATATNNAAAATCAGCCAACTCA  
AAGTGGCACCGTGGGAAAATATCTTTGAACAGTTTCAATAGATTAATTTCAAAAATATGGGCAATAAAAT  
ATTAAANTCNTTAAGAGTAGCGCTACTCCACCCGGTGACCCAAATAAAAGATGAAAAAGAGATACAAGA  
AGCTATTGTCTACATNCCATGACGACCCAATACAAGGAGGTCATAGCGGCATNACAAGAACGTTGGCNAA  
GGTNAAGAGACACTACTACTGGAAAGGTATGACNCGNCATATAAAAGAGTACGTACGTAGATGTCAAAA  
ATGCCAAANGTCTAAAACAAAGACGCACACAAAACTCCTTTAACNATAACNGAAACACCTGTANACGC  
TTTCGACAGAGTGATAGTGGACACAATTGGTCCGCTACCCAAATCGGAAAATGGNAATGAATACGCAGTC  
ACATTAATNTGTGACCTTACNAAATATCTAGTCGCGATTCCAATNCCAAACAAAAGCGCAAACACNGTCG  
CNAAAGCTATATTCGAAAATTTTATNCTCAAGTACGGTCCAATGAAGACGTTTCATTACGGACATGGGAAC  
AGAATACAAGAACTCGATTATAAACGATTTGTGCAAGTATNTGAAAATAAAGAACNTAACATCNACTGCA  
CATCATCACCAGACAGTTGGAACAGTAGAAAGAAGTCACAGAACTTTTAACGAATACATACGNTCATATA  
TATCGGTTGATAAACTGATTGGGACGTATGGATCCAATATTTTCGTTTACTGTTTCAACACGACCCCATCT  
ACGGCGCATGANTATTGTCCGTACGAACTAGTATTTGGTAAACTACCAAAACACTTCAATAGAATAGAAC  
AAACCTAGAACCTATATATAATATAGATGATTATGCTAAGGAAANNAAGTNTAGATTAGAAATAGCATAC  
AAAAGAGCTAGAATTATGTTAGAAAAAAATAAGGCGAATAGNAAGGAAGCATATGATAAAAAAGTAAN  
AACTTTGAANTAAAAATAGGAGATAAAGTCTTATTAAGAAACGAAACAGGNCATAAATTAGATCCAGN

ATATNTAGGACCATATANAGTAGAAAAAATAGAAGATAGNGATAACATTTTAAATTAAGGATAATAAAAA  
TAAAAAACAAAAAGTNCATAAGGATAGATTAAAAATTTTAAATNAATAA  
>160\_rnd-1\_family-312\_\_LTR\_\_Gypsy  
AAAATATATCCCACAATTGGCCGGCACACAAGAACAACACTATATCCTCTTGGCGACAGACAAGAATTGACGC  
CTACGATATTTTCAAGCCATACTATGGAANTTCTTAACATGANACAGGCAGCTTCAATTATAAAACAACAAA  
GCACGTCTTAAATGAAAAATAAAGAAGTGAAGCTCTGCAAACATTTCGTCTCTGGACTCAAGAAATCCCTT  
AGGATTAAGATCTTCCCAGCCCAACCAAAAAANTTTTCGAACAGGCCATGGCCCTTGCGCAGAAGGATAAG  
TGAGCTACGATCGCTATGCGCTCACGGCAAATTATGCCAAATACAGTGAGGACAAAACATCATAAGCTCAN  
AAAACAACACTACTCCAGGGATGGCGTCAGAATGACTTCCGACAATCAACAGATAATCCTAATTACCAGGNC  
AAAATGGTAATAATTTCAGCCAAGTTGAAAACAATGCCCGTTTAGTCAGAAATTAACACGGCGACACGTC  
GTCGCGCTGCAGACTGGCAACACAATTTTTTAGAACATCAGGTTTCAGGGATTCCATGCAGTTTTTTTTTGT  
AGTTTTTTTTTCTGTTACTTTGCTTAGCAACTTTTATCAACGTGAGTAATTTCCGTGCAGAGTATTAACCATA  
CGACCCAGGGTCAGGAAGAGAAACAAGCGAGAGTTACGAGTCTGTAGAGCAGGCCGAAGCCGTTTCGACCA  
CAAGACGACTTGACCGAAATCGAAACGTGCAATTTTTTGAGGTTGCATCTCAGCTACCAAAGTACAGTAGC  
AGGAGAAACCATAAGGCCTACCTGCGTCCTATCGGCCGATCAGTGTCTGCGTCGATCGCGATGGTTTG  
GGAGCGACTGGTCGCATCTAAGATGATTCTTGTCTGGAATCCCGTGGACTCATTCTGAATAACAACAGC  
AACATTCCTCAATAACAGTACTACCGAACGAGCACGCCGGCTTTCGAACTACANTCTTCAGGTGTTTGACG  
CAAAAGAGTATTGCAATGCAGTCTTCATTGACATAGAGCATAATTTGGACAGGTGAAGCTTCTGGGTCTC  
CTGGTCAAGGTAAAATGTCGCCTACCCTCGATCGAACGATCCTTCAATGTCAAAGCGCGAGCGGGATTAT  
CCGTCATAAATCCCCTTCTGGCAGAAGTACCTCAAGGCAGTGTACTCACTCCTATTCCGTTCTCGCTTCTCT  
CTGCTTTACAGCATACATACCGTTCCCTGACGTGAACAAGTGGTGCATTGATCCGGGCAAACCTGATGGTTA  
CCTACGCTAATGATGTCGGAATCTTTTTTCAGCTTCCGTTGCGAGTACGAAGCTGCAGATGGTATCCAGGAG  
TACCTTCACTTTCTAGATAACTGGGCTAAGATGTGGAATACTAACGTGTGCTTTAATTTAAGGATAAATGA  
GGGATAGCTCACTGGCAATACCGTTCCTCATGCCAACAAATTGAAATAATTAGGCTTGCCCTTTGAATAGA  
GGCTAACTTTTCATATCTCTCAAGTCAGTGGTTAATAGTTGCCGTACCAAATATCAATTCTGAAATGGCTA  
AATTGCATTGTTGCTCCCGTATGGATGCACGGCATTCCGATTTTGGAACCTGCTGCCAGTCCCAATGAAA  
GAGAGTGCAAATCATGCAAAAAAACATTGCGCTTAATCAGCGACTATCCATGGTATGTCAGCAACTCAA  
CTCTGCCTAAAGGCCTGAATCTTGCATTTTACCATTTCCTTCGAGGGAATTCACGGCGCACTAGGCGTCA  
ACCAGGCCTTTTTAGGCCGTAAACACACCAGAGGTTATTACCTTAATAGATACGGCGGTCAACGCCGCGCC  
TACACACCAATCAACATTCTTTAAGTCTGTAGCGGCGGAGATCCGCGCATTGAGTTACAAAATTAATTAG  
AAAACATGAAATCTAGTGTAAGTATGAAGAGCGCAATAAAGCTTCATCACTCGCTTTGGGAACGAATTCG  
CCTCGCTTCTCCGTCTTAGCGTTATGTAGGTCAGTTGTGCAATTAAATCGAAGCGATATACACCGAAACGA  
ATAACTTGTCTCTTAAAGCCACCAAGTTTCGGTTTTGTNAATTATATAACATAATTNAATTCTTCAGGCTG  
AATTAGGAACTATCACACAGAACAACATCAACTGTTAAAGAAGAAAACCAAGAACAACACTATATCCTCTT  
GGCGACAGACAGGAATTGACGCCTACGATATTTTCAAGCCATACTATGGAATTTCTTAACATGAATAGGT  
AGCTTCAATTATGAACAACAAAGCATGTCTTAAATGAAAAATAAAGAAGTGAAGCTCTGCAAACATTTCGT  
CTCTGGACTCAAGAAATCCATTAGGATTAAGATCTTCCCAGCCCAATCACAATTTTTTTCGAACCGGCTAT  
GGCCCTTGCGCAGAAGAATCAGTGAGCTACGATCGCTATGCGCTCACGGCAAATTATGCCAAATACAGTG  
AGGAACAAAACATCATAAGCTCAGAAAACAATTACTCCAGGGATGGCGTCAGAATGACTTCCGACAATCA  
ACAGATAATCTTAATTACCAGGGGCAAAATGGTAATACTTCAGCCAAGTAAACAGCCCGATTAGTCNGAAA  
ATTACCAGGGCGACANGTCGTCGCGCTGCAGACTAGCAACACAATTTTTTNGAAACATCAGGTTTCAGGGA  
TTCCATGCAGTTCTTTTTTTGTAGTTTTTTTTTCTGTTNCTTTGCTTAGCAACTTTTATCAACGTGAGTAATTC  
CAGGCAGAGTATTAACCATAACCACCCAGGGTCAGGAAGAGACAAGTGAGAGTTACGAGTCTGTAGAGCA  
GGCCGAAGCCGTTTCGACCACAAGACGACTTGACCGAAATCGAAACGTGCAATTTTTTGAGGTTGCATCTCA  
GCTACCAAAGTACAGTAGCAGGGCAAACCATAAGGCCTACCTGCGTCCTATCGGCCGATCAGTGTCTGCG  
CGTCGATCGCGATGGTTTGGGAGCGACTGGTCGCATCTAAGATGATTCTTGTCTGGAATCCCGTGGACTC  
ATTTCTGAATAACAACAGCAACATTCCTGAATAACAGCACTACCGAACGAGCACGCCGGCTTTCAAACCTA  
CATTCTTGAGGTGTTTGACGCAAAAGAGTATTGCAATGCAGTCTTCATTGACATAGAGCATAATTTGGACA  
GGTGAAGCTCCTGGGTCTCCTGGCCAAGGTAAAATGTCGCCTACCCTCGATCGAACGATCCTTCAATGTCA  
AAGCGCGAGCGGGATTATCCGTCATANATCCCCTTCTGGCAGAAGTACCTCAAGGCAGTGTACTCACTCC  
TATTCGTTCTCGCTTCTCTCTGCTTTACAGCATACATACCGGTCCCTGACGTGAACAAGTGGTGCATTGAT  
CCGGGCAAACCTGATGGTCACCTACGCTGATGATGTCGGAATCTTTTTTCAGCTTCCGTTGCGAGTACGAAGC  
TGCAGATGGTATCCAGGAGTACCTTCACCTTCTAGACAACTGGGCTAAGATGTGGAATACTGAAATAAAT  
CCTCCAAATAACTAACGTGTGCTTTAATCTGAGGATAAATGAGGGACAGCTCACTGGCAATACCGTTCCA

CATGCCAACAAAGTGAAATATTTAGGCTTGCCCTTTGANTAGAGGCTAACTTTTCATATCTCACAAAGTCAGT  
GGTTAATAGTTGCCGTACCAAAATATCNANTCTGAAATGGCTAAATTGCATTGTTGCTCCCGTATGGATGC  
ACGGCATTCCGATCTTGGAAGCTGCTGCCAGTCCCAACGAAAGAGAGTGCAAATCATGCAAAAAAAAAA  
ATTGCGCTTAATCAGCGACTATCCATGGTATGTCAGCAACTCAACTCTGCCTAAAGGCCTGAATCTTGCGG  
TTNCACCATTTTCTTCGAGGGAATTCACGGCGCACTAGGCGTCAACCAGGCCTCTTAAGGCCGTAAACACG  
CCAGACGTCATCACCTTAATAGATACGGCGGTCAACGCCGCGCCTACACACCAATCAACATTCTTTAAGTC  
TGTAGCGGCGGAGATCCGCGCATTGAGTTACAAAATTAATTAGAAAACATGAAATCTAGTGTAAGTNNGG  
AGAGCGCAATAAAGCTTCATCACTCGCTTTGGGAGCGAATTCGCCTCGCTTCTCCGCCTTAGCGTTATGTA  
GGTCAGTTGTGCAATTAAATCGAAGCGATACGCACCGAAACGCATAACTTGTCTCTNAAATCCACCAAAT  
TTCGGTTTTGTTAATTGTATAACATAATAACAATTTTCAGGCTGAATTAGCAGCTATCACACAAAACACAA  
CATCAACTGTTAAGAAGAAAACCAAGAACAACACTATATCCTCTTGGCGACAGACAGGAATTGACGCCTACG  
ATATTTTCAAGCCATACTATGGAATTTCTTAACATGAATAGGTAGCTTCAATTATGAACAACAAAGCATGT  
CTTAAATGAAAAATAAAGAAGTGAAGCTCTGCAAACATTCGTCTCTGGACTCAAGAAATCCATTAGGATT  
AAGATCTTCCCAGCCCAATCACAAATTTTTTCGAACTGGCTATGGCCCTTGCGCAGAAGAATCAGTGAGCT  
ACGATCGCTATGCGCTCACGGCAAATTATGCCAAATACAGTGAGGACAAAACCTCATAAGCTCAGAAAACA  
ATTACTCCAGGGATGGCGTCAGAATGACTTCCGACAATCAACAGATAATCTTAATTACCAGGGCAAATG  
GTAATACT

>160\_rnd-5\_family-3466\_\_LTR\_\_Gypsy

GCAGCGTTGCTTTTAATGTTTTAATTTAAGCTTTGACCACCGTGTCCCCCATTTGCATATTTTTGTGTTCTTA  
ATTCATCTTTATTTAATTCAGGTAATTTACAAGTAGTGTGTTGAGCTATTTTCATCATAAGAGAGTGATGCT  
AGAGAGCGCAGTTCAATAGGGCGATAACTTACATGCTAAGAATATATATATCGATAGTAGCTTAAATTAA  
AGTCATACATAACATTTCTTCCCCTTCTAAGGGACTGGTGAGAATATCCTTTTTTGGTTTAATTACTCGAGTC  
GAGCGACGTACACTTTGCTCTGTTTCGCATTGGTGTCTTATTGGTGTGACGATCCCCGTAACATTGGCGA  
TCCCCTTGGTGCTGACATAAGTTTCGTCTTGATTTAGTGAACCTATTATTTTCAGTTGTGCGCAAAGCTTTTGG  
TGTTCTGAGGCTATCATTTTCATCGGCATGACCACCCTGCCTGTTGTGCGGTCGTTACATCTGATCCAATGCT  
GTAATCCCTTGGTCTCTGCTCTGTTGTGTTATGAGCAGGTGGTGAATCTCTAGTTTTGCTGATGTTCACTGC  
TGTGTAGTAAGGTGTCTTTTCTGGGTTCCCTCCCTCTATGTTTTGTTGTTGTTGTCTCCGTCCTTCCACCCT  
GTGCCTCGTATCTGATTGATATGTCTTTTATGGTATTTATTGTTGTGTCGAATTTCATAATGCAGGTCACCC  
AAACGTCTTACGATCTCTCCTCGTATCCACTTATCCATTCTCGGGTTTCCAGAAATGAAGTAAACTACATC  
CTTAACCTCAAATTGGCGCCACGATTGCTTGCATTTTAAAAATTGTTTTGCTGACACCTTTTCTTGGTGGT  
TTCTGGTCTGATCAAATCCAGTCGTGTACGTAATTTTCGACCCAAGAAAAGTTTCGCTGGGGCTTCGCCAG  
TTGTGCTATGCGGAGCGTTTCTGTATTGCTGTAAGAATTCGTTTACGTTTCTTTTAAGTGTCTTGGGTGTCG  
TTCCCATTTGCCTTTAGCGCACTTTTTACCGTTTGGACATTTCTTTCTGCTTGACCGTTTCGTTGCGGGGTGAT  
AGGGTGCTGATAACTTGTGGTATTTGACGCCAACAGATGTGAGGTATTGCTTGAATTCGGCCGAAGTGAA  
ATTTGTCCCGTTATCGGACACTACCATTAGGGGGACGCCATACNCAGCAAATAAATCATCTAGTAATTTCG  
TTGTTGTTGTTGCCGTAATTGACTTTGTGATCTTAACGTCCAACCACTTTGAGTATGCATCCGTAACAATCA  
AAAGCATCGCACCTTCAACTGGTCCCGCGAAGTCGATGTGAATGCGCTCCCATGGCGCCTTAGGGTATTCC  
CAATAGTGATCTGAGCATTTTGGAGGTCGATGCGCATGTTTTGCACAGAACTCGCATGTTCTTGCCGCATT  
CTCGATGTCCTTATCGATTCTCTGGCCAGTAGACGAAAGAGCGTGCAATACCCTTCATTTTACTATAACCA  
AGTGGGGCCCTGTGTAGTTTCGTCCAGGATCAGTTTTTGAAGTTTAGTCGGGATAACCACACGATGTTTCGAAA  
GTAATGCAGCCAGATGATATCTCATACTTGCACCTCTGGTGATTGTTATCCATTTCTTGTGAGACATTGGCC  
GCTCTCCAGTATTTGCAGGATTTTGGCCAAATGCTGGTCTTTTCTAGTTTCTCGAGCAACCAGCGAAGCTG  
TAACTGGAAGCTGATTTATTTGTGCTATTATAAAACTATCGAATTCGTCTCGATTTGCTGTCTTAGAATGG  
ATACCATTACTCGTGTTGAGTGGTAATCGGGAAAAGTAGTCAGCATTTACATTTTCTTTGATGTTTTGGT  
AGTTACTGTGAAATTGAAGTTGCTTAAAAAATCTGCATAGTTTGCCATCCTAGAGATGCATAGCGTCGGTA  
GTGATTTAGTAGGGTGTAATAATTTGTGCGAGTGTTTGTATCGGTAACCAGTGTTCCAACCTTCTGGCGTAT  
AAGCATTTGAAGAATCTTTGTACCGCCCATACAATTGCTAGAGCTTCTTGTGATTTGTGTATATCGCTGT  
TCCGTGGGACTCATTGTACGGCTTGCATGCAATTGGTTCGTTCCGACCATTTTCCAAGCGATGCGATAG  
TACAGCGCCTATACCAATTTTGTGCGGTCGTTGCTAGCACTAATGGAAGTGTTGGGTCATAAGGCATCA  
GCACCTGCGGTGAAACTAAAATTTGTTTGATTCTGTTGTAAGCTAATTCCGTCTCTTCNGACCAGTAGAAT  
TGTCGTCTTTGAGTATATCACGCAGCGGTCTTTCCAAGGTTGACAGATTTGGTATGAACTTTGAGTAGTA  
AGCTGCTTTCCCAAGAAACAGCTGCACGTGTTTCGATTGTAGATGGTTTCGGTGCTTTTAAGATGGCCTCAA  
TATGTTTAGTTGATTTATGTATGCCTTCTGCGTCAATCTTGTGTCCCAGAAACTCAACCGAAGATGCGGCG  
AATACACATTTGGATTTGTTCAATTTAAATCCCAGGCTCTGTAATTTTTCTAATGTTGCTTCTAAGGTTCTT

AGCAACTCATCAACATCTTTTGCAAATATTAGAATATCGTCAAAGAAGTTACGTACGTTGGGAATATTTT  
CAGTGCGGCTCCATTGTTCTCTGCCAAATTGCCGGTATGTTGCTGCTCCGTACACTGCACGAGTCGGTC  
GAATGAGCCCGTGTGTTGCCGTATTCAATGTACGTACGTGTGCGAATTCTTCATCAATGCGCAAATGTGAA  
TATGCATCAGTTACATCCAAGTGTGCGAACACTGTGCATCCTTTCAATTTGGTTAAATATATCCTCTGTCCTC  
GGAATCGGATGCTCATCGATGATCATCTGAGCATTACGGTCGGCTTGTAGTTGCCAGTGATTTCGTACGCC  
TCCCGTTTTCTTCGTTACCACATGCGTTGTGGATGCCATTCTGAGTAATCAACTCGTTTGTAGAAGCCTGC  
AGCAATTTTTCGTCGATCTCTTTCGCATAAGNATCACGCAGCGCGAATGGTACATCTCTTGCCCCGAGCAA  
AAATTGGTTTCGCGTCCGGTTTTAGGTGCACCTTAATAGCTGGTCCTTTGAAGGTTCTCTGCTGCTGAGTCG  
AATATCGCATCAAATTTTGTAGTATTTGCTCTAGTTGTGTCTCTTATTCGTAGTCAGTCCCGCCGCTTGT  
ACTGCTATTGTTTTACCGCGCTTCCTTTCGCCGAGAGCATTTCAGATCTATGCCGTTGGCGTTGACAGA  
ATTGTTTGTAAGATCCCAGTAAAATCAATTTCTTTTGCGAATTGGGAGATCCATTCTCGCCACACAGTG  
TCTCCAGGTTTCCTTCTACTACATACAGATTTAGTTTTCGTGTAGTCTTTCATAAGTCACGTTAACAACCTG  
CCCGTCCACAGCAGTTGATCCTATGCCCTGTATAACTCGAAAATTTGCGGTCAGTCTTCTTTAATCGTATTA  
AAGGTTTAATTTTCCGAAGGGTCTTTTCATTCATTATGCTGCACGGAGCACCTGTGTCCAGTTCCATTGGTA  
TTTTTATTCCATCAATCTTCATTGTTATGATTTTCCTACCTACTGACTTGATGGCGTTGGTATTCGGTTGTTG  
AATAAATTGTATTTCTTCCGGGGCGTCAGAATCTGTTGACTCGGAAATCTGTTTCGTATTGGCTTTACATAC  
CTTCTTATATGCCCTACTTTACCACACACGTAGCATTCTCGTTTTTGAATTTGCAATCTTTGCGCAAGTG  
TTGCCCCCACATCCGTAGCATTGCTTCCTTGCTTCACTCCGCTTGACGGCTTCCTCCTGATTGGCGAGAA  
GCCCAGTTTGCATGTAGGCTCTGTATCTGAAGCTTGGTTGTCATTAACCGTGTTTGTCTGATCGTAGTAACA  
ATTCCCTGGAATATGCGGCCTCGTATGCGTCTGCAAATGTTGTTGGCTGTTTTGCGATTACCTCATCGCAA  
GTGCTGCGATTTTGCATGCCGAAAAGCATTGTTCTGTTAGCATTCTGTCTAAAAACGAGTCGTACTTGCA  
AAATGATGCTGCCTGTTTTAAGCGTAGAACAACGCTGCTAGTGACTCCTCTGGTTCCTGGCGTAGTTGGC  
GGAATTTGAAGCTCTCTGCGTAAATGTTTCGTTTGCCATCGAAGTGATTAATTAGCACTTCCTTAATCTCGC  
TGAATTGTAGTGTCTCTGGTTGCCCTCGGACTTATCAGAATACGTAGCGCTGAATTCAGTTCAGCTCCATA  
TGCACCCTTGCATAATGGTGGTGGTCAGCATCAGGAATTTTACTCAGTTGCAGTGCCCATTCGAATCGTTG  
GAAGTAGTCTTGCACTGTACAGTCTTCTCCGCCCTTGAAGTTTGGCATTGCAAACGGCGGTACTTTCGTAG  
AAATNGCTGCCCCACTTGCATTTTGACCTGCTTGTGCACTGCTGACTGAATGGCGCTAGTCAGTGAAGTG  
ATGACCTCTCGTAGTTGTTTCGTTAATAATGCTCATTTTGACCACTTCTGACACCACCTTTTGTGTTCTTAATT  
CATCTTTATTTAATTCAGGTAATTTACAAGTAGTGTGTTGAGCTATTTATCATATAAGAGAGTGATGCTAG  
AGAGCGCAGTTCAATAGGGCGATAACTTACATGCTAAGAATATATATATCGATAGTAGCTTAAATTAAAG  
TCATACATAACAAT

>9\_rnd-1\_family-461\_\_DNA\_\_Crypton-V

GGAGCCCCCTGGCTCCAAACCTAGAACCTCTTAGTTTTTTTATATCAAGTCAGTTTCCTATATAGGCTACAT  
GGTTTAGATATATTTAATTTTTCGAATACCTCGGTACAAATTTTCAACAGTTGTTATAAAAGTAAGGATAT  
GCATTACATAAGGTGAAGTGGGCAGACACTTCACAAATTTTGTACATAAAATATATTCATGAAAACTCTTA  
AGGCTTTTAATATAAAATATTCTTTACTTTACTTCTTTGCAAATATTATTTACACAACATCTGAATAACCAT  
TTTTAATTACTTATTTTTATCGCACAGTAGACTTTACTTTTTAAATACTAAAATCTTATAATTTATGGAGTC  
AACTGTTTCAGACATCACATACTATCCAGATAAATCATCGTCATTTATAAATTGTACATATTTTTCTCGCAA  
ACCAATGGCACCGTTAGATGATGTTAGAAAAATTACTGTGCCAATTACTAAAAGTCAGAAACAATGTAGA  
CGGCACTTTTACATATTTTGTAACAAACATTGCAAACAAAATTTGCACGCCACATAGAGCTTAAATATAGAAT  
GGAACCAGTTAGAGAGATCAGCAGTTTATCAAAAGACAAACAGCAAAGAATGAAATTGCTTGAGGGGATT  
ACGGAAAGACAAGGATGCTACTTACAATGAAGGAACCTTTTATAGTTTCACGTCNATTAAGGGAAAAACT  
CAAAAAGAGGGCTTTGGATTTTGTGTGCTGCAATGGATGTAAAGCCTACTTACCGAAGACAACAACCTCGG  
AATCANATTAATAAATTAATGTAGTAATATCCATAAAATATGCAACCGAGATATATTAACCTCTGCACGAA  
GTGCTGCAAATAAATTGCGAAATAAAATAATGCCTGTCCTTAATGACGTCGCCATTACTAGGACAATATT  
GTATGATCACCTAATTATATTGTTTAAAAATTTAGAAGCAATGAAGCACACGGAAGTACAGCATGATATG  
ATAACAGCAATTATGCGTTATCTAAGTCGCCTTTTGATAGTAATAAAATACGTTATTTCCCCTAAATATTA  
TGATTCTGTAAAGTCTGGAATTCGTTATGTTGCTGAGTTTGATTATGATAATATTCGTTTTATGAAGCCTAC  
TGCAGCGACAACCTCTAACATGCTTGGTAAAAATAGTACATGTGCGAGAATATTAAGACACAGATCATAA  
AAATATTGCGACAATAGCATAAAAAATATTTAGAAAAAGAAAAGATTTTGTTCAGGATCTACCTGCTAAAG  
CTTTGAATGAGCTAACTAGAAATTCAACATATCACCATTAAACCTCGTTATATCAGAGCAGAGTTAGCGA  
ACTTGAGAGTCTTACTCTTAAGAGCTACAGAACTGCTCATGCAATTGGGGCTATCGACGATAGAGCTAATT  
CTGACCTGTATGAAGGCACCTCAGCCAAAATGAAAAACATCACCAGGGTGATTATTCGTGCCAAAAAAA  
CCGAACATTTCCAGTTCTTTTTACACCATGCGATCGGTATTGCATAGCCAATATACTCGAATATGGCAAAC

GCACAATAAATAAACAGCTACTACACTAAAGATATATTTTAGTGTGCCAAGCCCGTGGCCACTAAGAAA  
AGAAAATATTCGTGAGTGTCTATCCTAGAGAAATTCGCAAATGAATGTGGTACACGTTGCCCTGAGTCC  
CTTTCAGGCACAGACCTGCGAAAGCAATTGACCACACATACCGCTTTGTTCAACGTTAAGGACATTCAAA  
TTGATTATTTGGCGAGCTTAATGGGTGATCATAAAGACATTCATAAAAATTACTATCGTGTGCTGCCTCT  
GTAGCGGGGGTGACCCAAGTTTCTCAATTACTTATGTCAACAATGAACATGGAAGAGGAAAATGCTGAAA  
TTGCAGATGCTAATCTCGAGAGTGAGTTAATTTATTTAGCCCGTCTGTTGCGAAGAAAATTTTAATAATCG  
CTGCAAGTTTTGGACCTGGAAGTGTATGTTGGAATACTTCAATAGAAGTTTTTCAAGTATCGGAACTTC  
GATACAGTAGAAGATACATTCAGTATTTAAGAAATTAGTAATGGTTTTGGCGACCTATCCATATTTAAAAT  
ATTTTGCTGGCGGGACCTCGGCCCGAGTTTTTTTTTAATTAATAGATTAAAACAATCTAATTTAATACTTAT  
ATTGCTTATTTTTATTTAAAGCAAAATATTTAAATAAAATATTTTTCAACTGTTTATTTAAACGAGCCCGAAC  
CTCGACCACGCCAACATAAAATATTTAAAAACATGCGCATTCCGGACGGTATCAGACGAAGCAGCGCTGGT  
TATCGCAGGGATGATCCGCACAGCAGCAAGGATGCAAAGCATGGAACGATGGCAAGCACGTTGGGATCG  
CTCATCTAAAGGACGCTGGACACATAGGCTTATCCCAAACCTTGAAGCCTGGATAAGCCGCAAGTATGGT  
AATACTAATTTTTACTTAACGCAGCCTATTTGGCCACGGACGCTTCAGAAGCTACTTGAAGCGATTCTGGCC  
ACGATAACACAGACGAGTGTCTTGGTGCGGCAGTGAAATCGCAGAGGACGCCAACCACATCATCTTTGA  
ATGTGGAAGGTTCTCAGTGAACAGGCAGGGCCTGGAGGACAGCTTGAGGAGACCTATCACGGTGGACAA  
CTTGTTTCAGGAACAAGTTGAAGACCGCACAAAAATGGGAAGCTACCTACACTTTTGCAGCAGAAGTGATG  
CTGGAAGTTCAGGAGAGTTGAGCGCAATAGATGGAGAGCGGAGGAAGTTTAGGTGGCAACAACATGCCTG  
TGAAGCAATGCTTTGCGGCCGTTCCGCAGGCAATCCACGCCACCTAATCATCACGTACCCTCCTCCTCTAT  
GTAATCTTGCTTCCCAAACAAAAATTGAAACATGCCGCTTACCTTCGTTGATATATCAGCTGTTTATGTTTA  
CGGTACTTTACCATTTTTCAAACATCGATAGAAATCTCGATAAAATCATCGTAAAAAACTCAATATGTTCCG  
CGCGAATTTACACATTNCTCAAAAATGTGGCCTTTTTGAATGATGTGTGAAATGTGTTTTCTTATCTGGAA  
ACGCACAGGGCGCATTTGTAGGGACCAACTGGCACAAAAATTTATCATTTTCATCCATTACACCAGCACCC  
GTTTCACAGTCAAAAAGTCAACGAAATATTATGCATGCATCCCATCGTAGTCGCTATTTGCTTTCGCACGAC  
GCTGCATGATTTTCGCTATCTCAGCGTCGGTTCGTTTTCTTCACTCGCACTTTCGTGAGAATGAAGGAATGCT  
CGATAGATCAGGCCCCATCACCGTTATAATTTAGATGTGGTGAATAATAATTGTGTTTGTATTTGTGTTTTT  
GCTGAAATTGAAGAAAAGTAGAAGGTCCGATTGCCACGCTTCGTTCTTTTTAATTCGACAGTGGAACAAG  
CAAGTCACATATTTTGAGCGCGCATAAATCATAGTAATTAACGGTGCAGTGGCTGTACACCGCTTCGGATT  
TTTAAGGGCATATCGAGCCCAACTCTTTTTAAAAGTCCCCAGTGCTCATAACAGTTTCGCGTTCAGCNGATGT  
TATTCGCTTTTAATTAATCAAGCGCGTAATTCTGAATTAACCCCTTTTTTAGTGATAAAATCTTACTTAGC  
TACCGGCCAGCCATTGCGCAACGACGCGTTCGTGTATTTCATATATATATACACATATAAATTCAGCGTGGC  
TGGTCGGTCGTAGCCAATTTGTGAGTTGCAACGGCTCTAAGGGAGTGGAATAATCAAAAAGGGCCACGGA  
TTTCTTAAGGATCACTACAGATTAACACTGCGGCGCCACCGGCACATAGCGGCTGAGTCTATACCCCGCG  
ACCGCGTGTTTAGCCATTGATAACCAAGCTTTGCTTATCTACTTCTACGTTGCCGCCCCCTTTTTGATCAACG  
GAGTGTCTCCAACAAGGTATAGGACCGCTTAAGTGTGCGCAGATCGAGATCGAATATACGTGCTGGGCGA  
TTGGTTGGAATTTTTGCGTACACGCTTCGATCTAAATGATCATGCTATTTAGCCATTGATAACCAAGCTTTG  
CTGATCTACTTCTACTTTGCCGTCCCTTTTTGATCAACGGAGTGCTTCAACAAGGAATCGGACCGCTTAA  
GTGTGCGCAGATCGAGATCGAATATATGTGCTGGGCGATTGGTTGGAATTTTTGCGTACACGCTTCGATCT  
AAATGCTCATGCCTTAATATTTAAAAACCTCTTTCGTTTTGCTCAATTTATGAAATAAAGAGAAAAGCTGC  
TGCTTTAGAAACCTAATTTCTTTAGCCAAATCAATATAGTCAAGATCTATCGTATTTTATAATTCTATTTTT  
TTGAAATCGACCATTAAAGTAACCTTGATAATGAGATGTTATACTTAAACTAAACGGAAAACTAAGTGGC  
ATGACAATTAGGCGATGAGTGTACGGTATATCTCAAATTATTTTTTAACAGATATACTAATTCGAATTGCT  
CCACAGATATTACGTACGCATGCGAAGGATTTTATTTGTTCAATTTTGTGAGTATGCCATGGCCACATAAG  
CCAGCAAAAGAGTTGTAAATATTGAAAAATAATTGTAAATCGGCGAGCCTTCAGCACTACCCGACATAGG  
AAAAAGCATATGATTGTAAACTACCGTCTCCAGGGGCCATTATCTATTTTCAA

>9\_rnd-6\_family-1736\_\_Unknown  
TTTGGAACGTCATATCTCCGCGCGGAGTTATGTCGTTTTGGAACGTCATATCTCCGCGCGGAGTTATGTCG  
TTTTGGAACGTCATATCTCCGCGCGGAGTTATGTCGTTTTGGAACGTCATATCTCCGCGCGGAGTTATGTC  
GTTTTGGAACGTCATATCTCCGCGCGGAGCTATATTACCCGAGATATTAaaaaaatCATCGAAAAAGTTTCG  
ATTTTCGCACCGACCTCGATTTTGAAAAAACGTGATGCAACCCTTGCCATTTTGTGATTTGGGTCAAAA  
TTTTGGATTTCTTTTTGATGCCAATCGATAGAACTGATCCTTACGAGTCAAAAATGGTATAAAAATTCCA  
AAATCGGACATTATTTGACGGAAATATTCAAAAAAATCATCAAAAAGGAATTTACGAACGAATCGGATT  
TTTCGACATCGACGATTATTTGTTTGAATGCCAATCGATGGTAGGGATCCGTACGCATTCAAAAAGAGGTA  
TAACATTTTAAAAATCAGACATTATTTACCGAGATATTAaaaaaatCATCGAAAAAAGTTTCGATTTTTTC

GCACCGACCTCGATTTTGA AAAAATCGTGATGATTTTGG AACGTCATATCTCCGCGCGGAGTTATGTCGT  
TTTGG AACGTCATATCTCCGCGCGGAGTTATGTCGTTTGG AACGTCATATCTCCGCGCGGAGTTATGTCG  
TTTTGG AACGTCATATCTCCGCGCGGAGTATTACCCGAGATATTA AAAAATCATCGAAAAAGTTTCG  
ATTTTCGCACCGACCTCGATTTTGTGCGNTTTGGGTGATNTTTGGATTGCCGATTTTGGATGNCAATCGAT  
AGTCGNCATCCNCGCGAGTCA AAAAAGGTATGNCGTTCCGAAATCGGACATNATTTGNCCGAGATATTCCA  
AAAAATCATCGAAAAAGGTTGATTTTCGCGANCGAATCGGTTTNCGAAAACGAAATTTTCCGCGATGATTT  
TTCGTTTNAACGTCATTGATCTCCGCGCGGAGTTATGTCGTTTGG AACGTCATATCTCCGCGCGGAGATA  
TTAAAAAATCATCGAAAAAGTTTCGATTTTCGCACCGACCTCGATTTCGAAAAATCGTGATGATTTTGG A  
ACGTCATATCTCCGCGCGGAGTTATGTCGTTTGG AACGTCATATCTCCGCGCGGAGTTATGTCGTTTGG  
AACGTCATATCTCCGCGCGGAGCTATTACCCGAGATATTA AAAAATCATCGAAAAAGTTTCGATTTTCGCA  
CCGACCTCGATTTTNGAAAAACGTGATGTAACCCCTTGCCATTTTGTGCGATTTGGGTCAAAAATTTTGGAT  
TTCCTTTTTTTGATGCCAATCGATAGAACTGATCCTTACGAGTCA AAAATGGTATGAAATTNCAAAATCGG  
ACATTATTTGACGGAAATATTCCAAAAAATCATCAAAAAGGTTGANTTTACGAACGAATCGGTTTTTTCG  
CAACAACATTTTCAACCCATCGATGATTAATTTGTTTGAATGCCAATCGATGGTAGGGATCCGTACGCA  
TTCAAAAAGGTATAACATTTTAAAAAATCGGACATTATTTACCCGAGATATTA AAAAATCATCGAAAA  
AAGTTTCGATTTTCGCACCGACCTCGATTTTGA AAAAATCGTGATGATTTGGAAGGTCATACCNCGCGG  
AGTTATGTCGTTTGG AACGTCATATCTCCGCGCGGAGTTATGTCGTTTGG AACGTCATATCTCCGCGCG  
GAGTTATGTCGTTTGG AACGTCATATCTCCGCGCGGAGTTATGTCGTTTGG AACGTCATATCTCCGCGC  
GGAGTTATGTCGTTTGG AACGTCATATCTCCGCGCGGAGTTATGTCGTTTGG AACGTCATATCTCCGCG  
CGGAGTTATGTCGTTTGG AACGTCATATCTCCGCGCGGAGTTATGTCGTTTGG AACGTCATATCTCCGC  
GCGGAGCTATTACCCGAGATATTA AAAAATCATCGAAAAAAGTTTCGATTTTTCGCACCGACCTCGAT  
TTTGA AAAAATCGTGATGTAACCCCTTGCCATTTTGTGCGATTTGGGTCAAAAATTTTGGATTTCTTTTTT  
GATGCCAATCGATAGAACTGATCCTTACGAGTCA AAAATGGTATGAAATTCCAAAAATCGGACATTATTT  
GACGGAAATATTCCAAAAAATCATCAAAAAGGTTGAATTTACGAACGAATCGGTTTTTGTCAACAACAT  
TTTTCAACCCATCGATGATTAATTTGTTTGAATGCCAATTGATGGTAGGGATCCGTACGCATTCAAAAAGG  
TATAACATTTTAAAATCAGACATTATTTACCCGAGATATTA AAAAATCATCGAAAAAGTTTCGATTTTC  
GCACCGACCTCGATTTTGA AAAAATCGTGATGATTTGGAAGGTCATATCTCCGCGCGGAGTTATGTCGTT  
TTGGAACGTCATATCTCCGCGCGGAGTTATGTCGTTTGG AACGTCATATCTCCGCGCGGAGTTATGTCG  
TTTGG AACGTCATATCTCCGCGCGGAGTTATGTCGTTTGG AACGTCATATCTCCGCGCGGAGTTATGTCG  
TTTTGG AACGTCATATCTCCGCGCGGAGTTATGTCGTTTGG AACGTCATATCTCCGCGCGGAGTTATGTC  
GTTTTGG AACGTCATATCTCCGCGCGGAGTTATGTCGTTTGG AACGTCATATCTCCGCGCGGAGTTATGT  
CGTTTTGG AACGTCATATCTCCGCGCGGAGTTATGTCGTTTGG AACGTCATATCTCCGCGCGGAGTTATG  
TCGTTTTGG AACGTCATATCTCCGCGCGGAGCTATNTCGCTTTGG AACGTCATATCTCCGCGCGAAAAATT  
TCGATTTTTCGCACCGACCTCGATTTTGA AAAAATCGTGATGTAACCCCTTGCCATTTTGTGCGATTTGGGT  
AAAATTTTGGATTTCTTTTTTGTATGCCAATCGATAGAACTGATCCTTACGAGTCA AAAATGGTATAGAA  
ATTCCAAAAATCGGACATTATTTGACGGAAATATTCCAAAAAATCATCAAAAAGGTTGANTTTACGAACG  
AATCGGTTTTTTGTCAACAACATTTTCAACCCATCGATGATTAATTTGTTTGAATGCCAATTGATGGTAG  
GGATCCGTACGCATTCAAAAAGGGGTATAACATTTTAAAAATCAGACATTATTTACCCGAGATATTA AAA  
AAATCATCGAAAAAGTTTCGATTTTTCGCACCGACCTCGATTTTGA AAAAATCGTGATGATTTGGAAGGC  
CATGCGGGAGTTNTGTCGTTTGG AACGTCATATCTCCGCGCGGAGTTATGTCGTTTGG AACGTCATATC  
TCCGCGCGGAGTTATGTCGTTTGG AACGTCATATCTCCGCGCGGAGTTATGTCGTTTGG AACGTCATAT  
CTCCGCGCGGAGCTATGTCGTTTGG AAGTCATATCTCCGCGCGGAGATATGTCGTTTGG AACGTCATATC  
TCCGCGCGGAGTTATGTCGTTTGG AACGTCATATCTCCGCGCGGAGTTATGTCGTTTGG AACGTCATAT  
CTCCGCGCGGAGCTATTACCCGAGATATTA AAAAATCATCGAAAAAAGTTTCGATTTTTCGCACCGACCT  
CGATTTTGA AAAAATCGTGATGTAACCCCTTGCCATTTTGTGCGATTTGGGTCAAAAATTTTGGATTTCTTTTT  
TTGATGCCAATCGATAGAACTGATCCTTACGAGTCA AAAATGGTATGAAATTCCAAAAATCGGACATTAT  
TTGACGGAAATATTCCAAAAANATCATCAAAAAGGTNGAATTTACGAACGAATCGGTTTTTTGTCAACAA  
CATTTTTCAACCCATCGATGATTNATTTGTTTGAATGCCAATCGATGGTGGGGATCCGTACGCATTCAAAA  
AGGTATAGCATTTTAAAATCGGACATTATTTACCCGAGATATTA AAAAANAATCGAAAAAGTTTCGATT  
TTCGCACCGACCTCGATTTTGA AAAAATCGTGATGATTTGGAAGGTCATATCTCCGCGCGGAGTTATGTC  
GTTTTGG AACGTCATATCTCCGCGCGGAGTTATGTCGTTTGG AACGTCATATCTCCGCGCGGAGCTATGT  
CGTTTTGG AACGTCATATCTCCGCGCGGAGTTATGTCGTTTGG AACGTCATATCTCCGCGCGGAGNTATG  
TCGTTTTNG AACGTCATATCTCCGCGCGGAGTTATGTCGTTTGG AACGTCATATCTCCGCGCGGAGTTAT

GTCGTTTTGGAACGTCATATCTCCGCGCGGAGTTATGTCGTTTTGGAACGTCATATCTCCGCGCGGAGCTA  
TTACCCGAGATATTAAAAAAATCGAAAAAGTTTCGATTTTTTCGCACCGACCTCGATTTTTGAAAAAACGT  
GATGATTTGGAAGGTCATATCTCCGCGCGGAGTTATGTCGTTTTGGAACGTCATATCTCCGCGCGGAGTTA  
TGTCGTTTTGGAACGTCATATCTCCGCGCGGAGCTATTACCCGAGATATTAAAAAATCATCGAAAAAGTTT  
CGATTTTTTCGCACCGACCTCGATTTTTGAAAAA  
>160\_rnd-5\_family-20753\_\_Unknown  
GTGTAGAGGTCCAAAATCAGAAATCCTAAAATCTTGTTAAATTTGCATCGGGGACGGGCAGGCAGGCAAG  
CAACAGGCACACAAGCGCATAAATGCTTCTATTACACACAAAATATGCAAGTATGCGTGTATAGCGAGT  
CCAAAATATTCTAAATGCACACATGGCAACGCTTGGGTACCCTTACAAACGATAGTGAGCTAAAATGCAA  
GAATTTTCGCATCGACGTGGCAAACCCTTTCTCTATTTTCATATTAGCCGTGCCTTCAAAAAGGGTAGAAATGC  
CTCAGCATTTGGGAAAAATTGAATTTGTGCGCAGTTTTGCTCGTCGGACAAATACACACACACACACATTG  
AAACGATCCCTAAACATAGAGAGAGCATTGAAAGCTGCGAGTAAGTGCGAGCGAGATAAAAGTTAACAG  
CGTTGCCGTTCTATCGCACAAATCATAAGGATGAGAGTGGGCCAAGCACTTTCCTGTAGAGTAAGCGGTT  
CAAAATACATCATATGTATATCTTACTCCCTTACTCGCGATTTTTGGACCAGATGCCTCTGATAGTTTTTGTG  
ACAGCGCTGTTTATATGGGATGACCAGTCTATATGTTGTTTGGTTAGTGCTTCAGCAAAGCTGGTCGATGC  
TTCTTTGCGTCGTTTCGTTATCGAAGTACATTGAGCGAAAAATTTTAGAACTTACGATCGACGCAAAGTGC  
TTGTGCTTTATTGTGAAATGCATGCTTTATTTAAATGATTTATTACCATAGATACTAACGATTTTTTTTACA  
GGAAGATATAAGAATTAAATTATATTTACACAAGGCACATCTTGTGCAATAACTACGATAAGAATTTAGC  
ATACATAGATTGATTTCACTTTCGTTTTTCGACAGAGAAAAAGTTCTTGTCTCAGACAAAGGCGTGCAAGCA  
GCTTTGGTTGAATGCTTTGAGTAATAAAGAGAAAGAGACGGCATTGGGATCAAAAGCTCTTTTTAGAAAT  
ACTTCTGAGCGAAAACGAGGTTGCAAACAAAAATTGCAAAGACAACACCCAGCTGTCTGCAGCTTCTTC  
TGCCGATGCCCACAATTCAATGGCAACTTCAAAACATTTTCCATTAGAACCAACAACAACACATAATC  
AAAGCAAATGACTCGACAGTGAAAAAAGCATACCACAAATTCTGTCTTGTCTATCCTTTTTTGTGTTGAGGC  
TACAGTCTATGATCTTAGCCTCTGCACCCATCCAACTCATTGTTGTGGTTTCTATGCACTGCTATGCCTATA  
ATTCGCAAAGTCATGTTTTCTTCTTCTTCACTCGCTTCAACTTGCAAGCAGATCGGCAGATTTTTTATAATT  
TTTCATTTTTTCGACCAGCAAGGCACCTTTTCTCAAAATAGGGTATTTTAACTATTCATAAGCAATGTAACC  
AAATAGCACAAACCATCTTATATATACATTTTTATTGAATGTCTAAAAAATATAATTTTGTATTAAGTGT  
GCAGCTATTAGTACAGTCAATAAAAATTGTTTTCTTTATAAATTATATACCATTCTTATTAATAAGTATC  
AATGCCGCATCCTGCCAAATAGTTGCTTATGTGTGTCTCATCTCACACATATTGGTTCAAATCTGCATATTT  
GTATGTGTCTGCCAAGCCAAGGGAAGTCTATGAATTTAAGAAGATTGCAACGTTCTGTTGCGCATGTGAC  
GTCACAGTCCAAGGCTTTTTATGTGCGATCATTTTCGTACATAAAATTATTACATAAGTCAACAAATTATTA  
TCTATAAAAGACCCCATTAATAAGGTATTTAAATGTACCTAATAAAGGTAGAAATATATGCTAAACATCA  
CAAGAAATAAAATTCTATTAAGTGTGACGTCATAATATATGGGCGCCGTGCGCGTAACCCNTTATCTGAG  
TGCCGTGGCTTGCTGATATTCAAATTTTCTACCTACTTGCGCCGAGACTCGGCTCTACAACAACAACATTA  
GTACCCGAATTGTGCTGTTGTTGTTTATACGCGCTGCCTTGTAGGAACGACAGAGAAACCCGCAAAGAAC  
ACTGTGGGATGAAGAACAATTGGGTTTCGTGAGCACTGTTGTTGTTTTGCAAGTGATTTGTTGTTGCTTC  
CTATGGTAAATGAGCTTTTTTATTGGGTGTGATTTTGCGTTTGCGGACCAACTCGATCTACGACTCGTGGTT  
TTTAAAACGGTAAAAAAGCTCAGAGCGTCAGTTCAGATCTTTCTCTTTATTACTCAATGACTAAAACCTAT  
ATACATAAGATAAGCAACATATATACATACATATACAGCATATAATTACATATCTACAACATAATACCGT  
TTATGTCTAACTTAGGAAGGGTTAGGAGAATAATTCCTACAAGAGGTGCCAAACACACTAGTAGCATCCC  
AGATATTAGAGAAGAAGAAGCATCCGAAACCATGTACATGGCTCAGGTAATACCCCGGCACAACCTGCC  
AACTTGCACATGTAAAAAATAATAGGTAGCTTTAAAATTGTTCGATTTATTTAAAAACCTTCCCAACATACG  
ACGGGAACATGGAAGGACTAAGGGAATATATTACAAAAGTTGAGTAGATATTAATGCTAATAAAAGGGG  
CAGCCCAAACCTCCAACCGGACTAATGATACTAAGGGCAATCAGAAACAAGATTCAGGGAAAAGCGCATG  
AAGTACTATACCAATCGGGAAGTGAAGTGAAGTGGGACGAAATAAAGAATAAACTTATTACCCACTTCGC  
GGACATGAGAACCGAACATAGCCTTATGGCAGACCTAGGCATCCTTTCACCTCAATGTTACCCAGTAGGA  
ATTCTGTACGAAAAGATAACAGATATTCAAAGAGCTCTACTCAATATCGTAAAAGAAAAATAAGTGAATC  
AAACGGTCATTGAAACCAAAAAGAGAAGTCTTCAACAAACAATGTTTTACAACATTTCTAAATGGACAAAT  
CTGACTTTCTACAAAAAGAAATTGAATACCTCGGACACATTGTAACACTAGATGGCGTTAAACCAAACCC  
GTCAAAAATGGAAGCTATAAAAAAATGTCCTTTACCGAAATCTTAAAAAGAAATTAAATGCTTCTTGGGT  
TTAATGGGTTATTACAGGAAGTTTATGAAAGACTTCCCAAATATAACCCCTGACTAAACAATTAAAAGGG  
AAAACGATTGTTGTTTTAAACGATGAATTTATAGAAACATCTAACTACTGTAAAACCTTGCTTTGTAACGA  
CCAATTACTAATTTACCCCGACTTTACGAAACCATTCATACTAACAACAGATGCTAGCAATGTAGCGTTAT  
GAGCTGTGTTATCACAAGGACCTTTAGGGTCTGATAAGCCAATTTTGTTCGCACGCCGAACACTAACCGAT

ACAGAAGAAAATTATTCCTATTCGGTCAAAAAGTTTAAGATATTTACAGACCACAAGCCATTAACCTGGTT  
AATGAGTTTAAAGGAACCCAACCTCCAAATTAGTCAGATGGAAGCTTAGACTTGTGGCGCTATCTGGCAGC  
ACAGAAATTGATACATTTTAAAGTTTTTGTCTTTGTTATTTACCATATTACGAAAAGTATGTACACTTTCT  
TCTAGCTCGAGCTCTCTAACCGTCAACATCTACGCATCTTAATATTTACTTTTTTGGTGTCTAATAAATAAA  
GCTGCTATTNCTAAAATCGAAATATTATTACTTGTGTTAATGGATGTAGAATTTGACTTTTAAAGTTCCA  
TTCATATAACCAAAGACTGTTGGAATACGACTATGAAGTAATATACAAAAAGGGTTTCGCAGAACGTTATA  
GCAAACGCACTTTGTAGAACAACACTAGACGTAAACATGAATGACCCCGAATCAAACAAAGGAACTTGT  
GGAGAGACAGTACATGTAATGTCTGTGAATGGGCTGATCATGGGCGCAAAAAGAAAATACATTATTGGCAC  
GCGTCTGACGAGCGCCCTTAGATTTTGATGAATGAATGTTGACCCCTTATTACCTGCACCAGTTCGTTGGG  
TCAAGTGGGTCAACTTTTGGCAAGCACCTGCATATGGAGGTCAAGTGACTGATCACCAAATTATTAATA  
CTATAAATATATAATCGCTCCTTTTTTTTTTAAATTTGGTATATTTTAAATATTTTAAAGATTTTTCTTTACTCA  
AATTTTCATTCAAATCATTAAAAAGAAGGGCGCGCGTCAGACGCGTGCCAATAATGTATTTTCTTTTGCGC  
CCATGATCAGCCCATTCACAGACATTTGTATGTGTGTGTCTGTGTGTAGAGGTCCAAAATCAGAAATCCTA  
AAATCTTGTTAAATTTGCATCGGGGACAGGCAGGCAGGCAAGCAACAGGCACACAAGCGCATAAATGCTT  
CTATTCATACACAAAATATGCAAGTATGCGTGTATAGCGAGTCCAAAATATTCTAAATGCACACATGCCA  
ACGCTTGGGTACCCTTACCAACGATAGTGAGCTAAAATGCAAGAATTTTCGCATCGACGTGGCAAACCCTT  
TCTCTATTTTCATATTAGCCGTGCCTTCAAAGGGGTAGAAATGCCTCAGCATTTGGGAAAAATTGAATTTGT  
GCGCAGTTTTGCTCGTCGGACAAATACACACACACACATTGAAACGATCCCTAAACATAGAGAGAGCA  
TTGAAAGCTGCGAGTAAGTGCGAGCGAGATAA

>160\_rnd-1\_family-326\_LTR\_Gypsy  
TGATGTCCAGTCTATATGTTGTTTGGTTAGTGGTCAAGCCAATTACCGATATAAATATCGATATCGACAT  
TGAAACACTGGACGATACAGAATCAAACATGCCAGACCAGGTAGCCTTAGATAGGGAATATGTAAGACA  
AATTTTCGTCTNCAGTCCCTGAATTTGACGGTAAAAAACTGTCACTAAATCGTTCTTTAACAGCCTTAAGGC  
TTGTTGAACGAATAAAGGGCAACCAATAGGATTTGGCTGTAGAAGTCATAAAATCAAACCTAATTGGCCC  
AATACTATACAAATGCCAAGACGAGACCACGATTAATGTCATTATTAATAAATTAAAAAGTAGCGTCAA  
GGTGAATCCATTGACTTGCTTAAGGCAAAGCTGTTAAACGCCCAACAAAAAGGCAAAACAGCAGCTCAAT  
TTACGGCTGAAATCGATAACTTGCGTAAGCAACTCGAGGCAGCTTATATTGACGATGGCCTAGACTCGGA  
TAATGCAGAGAACTCTACCAAAGAGTCAATATCAACAATGACCAAAAATTGTGAATATGAAAAAAGCT  
CCGCATAATACTAGAAGCTGGAAACTTCAGCACATTTAATGATGCAATGAGTAAATACATTCATTGCAGC  
ACTGAAATGACTGGAAGTGTCAGCACAGTATTATATCAGCGAGGAAGACATAATAGAGGCATTGATTATC  
GCAATTACCAAAGAGGTAGAGGCAATGGCCGCGGTAAATCATAACGCAAACCTATAACAACAATAGCAATG  
GCAGAGGACATTATAGACGTAATGCCCGTGGTAATAACCGAGGAAGGAATAATTCCAACCGAGGTAACA  
ACCAAATAATAACAATAGAGGTAATGTCCGAGTAAGTGAAGGTAATTTCGGAAAACCANTGAGACCCCT  
CAGATGTTTAGAGCCAATAAATGGCACAATAAAAACCATCAACCTCAACCTCAGCATATTTGTAAAAATT  
AACAAATGAAAGAACAGGTAAATCCTTTGCACTGTTGCTTGATACTGGTGCAGATATATCTATATTAAG  
AAAATGTAGATATATTTGAAAACGTAAACGAAAGAGTTACTACCCAAAAATCGGGAATTGGCGAAGGAA  
CAATTTTTTCAAATGCTTGGCCTTTATAGAACTCACTACAGGTAAATACATAATTCCGCATAACTTCCAT  
TTAGTCGATCAAAAATTCCCAATACCTAGTGATGGCATACTAGGCATAGATTTTATAAAACAATATAATTG  
CCAATTAGATTTCACTCAGAGTGGCGACTCACTAATTCTTCGCCCAACAACCTTAAATTATCCGATTAAAT  
TACAAATACTTCATACTTGTGACAATAATGCCACAGTACTCCCAGCTCGTTCCGAAGTTGTCNGTGAAATA  
CAAATACCCTCAATAAAAAAATCAAATTTTGATATTAAATCAAGAAATTGATGAAGGAATTTATATCGCAA  
ATACCATATCCAACCACAAAAATACTTGTGTCCGAATTTTAAATACAACAATAACCAATAAGATCGTCAA  
TTTAAATAAAATAAAATATGAAACCTTAAATGATAAAAGAACTAACGAAGAAAGAGACAACTTCGTTAT  
GAATAAATTAATTAATAAACTTTCCGCCTTTATTCAAAGTCAATTAATAAGATTTATGTACCAGGTATACAG  
ACATATTCGGACTAGAAACCGAATCAATAACAACAATAATTTTTTACAAGCAAAAGCTTAGACTGAAGGA  
TGATCAGCCCGTATAAATAAAAAAATTATAGGAGTCCTCATAGCCAAGTACAAGAAATTCAAGCCCGAGTA  
CAAAAATTAATAGACAATAAAATAGTCGAACCGTCAGTCTCATAATATAATAGCCCACTCTTACTAGTCC  
CGAAGAAGTCTCTTCCGGACTCTGAAAAGAAAAAATGGCGATTAGAAATTGACTATCGTCAAATTAATAA  
AAAGCTATTGTCCGACAAATTTCCACCACCTAGAATTGATGATATTCTAGATCAACTATTTAGAGCAAAAT  
ATTTTTCATGCCTAGACTTAATGTCTGGCTTCCACCAAATTGAACTTGAAAACAGTTCTAGAAATATAACG  
TAATTGTCAACAAGCTATGGCTCATATCGCTTTACGCGATTACCATTTGGATTAAAAATAGCCCCAACTC  
ATTTCAAAGAATGATGACAATAGCATTTTCTGGTCTACAACCATCANAAAGCATTTCTTTATATGGATGATC  
TAATAGTAATCGCTTGTTCCAAGAAACATATGGTCAAAAACCTTAACTGATGTTTTCGACAAATGTAAAAA  
ACTCAACCTGAACTACATCCGGTAAATGTTTCAATTTTTTATGCATGAAGTCACATTTTTGGGACACAAAT



GCACTGATAAGGGAATCTTGCCAGACGACAAAAAATACGACGTGATTAAAAATTACCAACTCCCACACGA  
TGTGGACAGCGCAAGACGATTTCGTTGCATTTTGTAAATTACTATACGCGCTTTATAAAGAACTTCGCTAACT  
ATTCACGTCACATAACAAGATTATGTAAAAAAGACGTAAAATTTCGAATGGACGTCTGAATGCCAGAACAT  
CTCAAAACAGCACTAATAAACCTAACGTTGTTACAATATCCAGACTTCACCAAAGAATTCTGCATAATAA  
CAGATGCAAGTGAGCAAGCGTGTGGAGCAGTTTTAACTTAAAACTTTACTGGACTCCAACTTCCAATTGC  
ATACGCATCAAGATCCTTTACTAAAGGAGAAAGTAACAAGAGTACAACCTGAACAAGAATTAACAGCTATT  
CACTGGGTAATAACACACTTTTCGACCATATATTTATGGTAACCATTTTCACGGTAAAAACGGATCACAGAC  
CACTAACATCTATTTTCAATGGTCAATCCAAGTTCACAATTAACACGTATGAGGCTTGATTTGCAGGAATA  
TACCTTTACGGTAGAATATCCGAAGGGTAAAGACAGTTACGTAGCAGATGCGTTATCGAGAATAACCATC  
AAGGAGCTACAAAATATAACAAGAAACATAATGAAAGTCACTACAAGACAAGCACGTAGACAAGAATCC  
TGCGCAGGAGAAAAAGAAATAGAATTGCCTAGGCAATCTATAGAAAAAGCTTCAAAGGCCAAAGTGTAC  
CAAGTCATTAACAATGACGAGGTACGAAAAGTAGTGACCTTGCATGTAAACAATATGACATGTTTTTTAA  
ACATGGCAGACAAATTACAGCAAGATACGATGTTACCGATTTATATACTAATTAACCATTTGATTTAGATC  
AAATCTTTCAAAGGCTTGAAACGCAAGCCGGTATATATAAAATCAGCCAACTCAAAGTGGCACCCGTGGGA  
AAATATCTTTGAACACGTTTCAATGGATAATTTATAGAAAATGGGCANTCAAATATTAATAATCTTTAAGA  
GTTGCGCTACTCCACCCGGTGACCCAAATAAATTCTGAAAAAGAAAAATAAGCTATCTTGTCTAAACTAC  
TTGATGATCCCATACTAGGAGGACATGCATTATAAAAACTTGGCCAAAGTCAAACGACATTATTTTTTG  
AAAGGTATGTCTAAACAAATAAAAGACTACATCCGCAAATTTCCAAATGCCAGAAAGCAAAAACCTACA  
AAGAACACAAAACTCCTCTAACATAACAGAAACACCAATATCCGCTTTTCGACAGAGTAATCGTTGACA  
CAATTATTACCATACCTAGAACAGAGAATGGGAACGAGTATGCAGTTACACTCATTTGTGATTTTACGAA  
ATACCTCGTCGCAATTCCGATCCCAAATACAAGTGCAAACACTGTCGCTAAATCTATATTCGAATCTTTTA  
TTCTGAAGTACGGTCCAATGAAGACGTTTATTACGGACATGGGTACGGAATATAAGAATTCAATTATAAA  
CAATTTGTGCAAGTATATGAAAATAAACAACCTTAACATCCACTGCACATCATCACCAGACAGTTGGAACA  
GTAGAAAGAAGTCACAGGACTTTTAACGAATACATACGATCATATATATCAGTTGATAAACTGATTGGG  
GCGTATGGATCAAATACATCGTATACTGTTTTAACACGACCCCTCTATCGCACACAATTATTATGAGCAA  
ATTCTTGGTAAGCACCCAATTTACCAATATAAATAGAATCGACCCACTATATAATGTAGAAGATTATGCTA  
AAGAAGNTAAGTTTAGATTAGAATCAGCATATAAAAGGTCTAGGATATTGCTTGAAAAACATAAAGCAA  
GAAGTAAGGAACTTTTTGATAAAAAAGTTATAGATTTTCAAGTAAAAATAGGAGATAAAGTCTTATTAAG  
AAACGAACTGGCCATAAATTGGATCCAGAATATATAGGCCCATATACAATAGTTAACATAGAAAAATAGG  
GATAACATTCTAATTAAGATAACAAAAATAGGACCCAAAAAGTTTATAAGAATAGACTAAAAATTTTTTA  
ACGAATAAAACATATAAATGTTCTATATGAAGTCTTTATGTTTCTTTATGAATTCACAACAAATAACAAGT  
AAGAGGTTCTAGTCGGGAGCTCCCGACTAGGGGATACCCTGAACCCTCTTCTTCCAACATCAAATGCATAT  
ATAATCTATTTTAGAAGCTATATGTCAAGTTTGGTTCTAG

>Ref\_dvir\_258

GTCTTTATTGGGGGACAGCACTTAGTGTAGTGGTTTGGAACATCTGTTGGCGTCTCTCACTCGCGCCTTC  
AATCGGCTCAATAGTTATGGATGGCCTGGAGGCAGGCCGGTAGCGATTGCTAGATGGAGCCAC  
AAGGAGCTGCTGAGCTGTTGCATATTTTGTGTTGAGTGGGCGATGCCGAAGCCGTCGCTCACTCCAAATTGA  
GGTATTTAACCAGCAGGCCGTCGTGGAGCATATCATCTTCTTGGTAAGTATGTATTTTAAACAATGTTTAT  
TTTGTGTTTTGTTTATGTGCCTTTGCTTGCAGGACCAGCGCATCATCGTCGTGGTTTGGAACATCCAGTGGC  
GTCTCTCACCTCCACAACCTTGTTCCAGGAATTGCATGTCAGCTGACTTGCGCGCCGAGCAACGTATTGGG  
TGGCCCGCAAACAGGCCGGTTGCAGTTCAGGGTGCTAGATGGAGCCCAAGGAGCTGCTGAGCTGTTGC  
ATATTTTATTTGAGTGGGCGATGCCGAGGCCGTCCTCACTCCAAATTGAGTTTTTAGCCAGCAGGCCGTC  
GTGGAGCGCATCATCTTCTTGGTAAGTATGTATTTTAAACAATGTTTATTTATGTACCTTTGCTTGCAGGAC  
AGCGCATCATCGTCGTGGTTTGGAACATCTAGTGGCGTCTCTCACCTCCACAACCTTGTTCCAGGAATTGT  
TTTTTTTTTTTTTTTTTTTTTTTAAACCACTTGCCCGCCAGAAAGATACTGACGGTGTCTTTATTTTAAATTTAA  
CTCATTACTTTAACATAGCAACTTATTTTAAATTTAAATGGCAACAGAAGTTTTTATAATATGTGGGCAAA  
ACATTTTGCAGCCCTGTTACAGCGTGTGCGGTATTTTCTTATATACTAACTTATCGGCTAAACGCATTTTTTG  
TATTTTAAATTTGCAACGATAGTTTTTCGTCCTATATTACTCATCTTTAGGAGCGGCATCAATGGCAGCGTTTC  
CTGAGTTTGGCCTAGTAAATCGCCGTGGGAACCTGCGTCTTCTTGAAGCAGTGGCATCAATCTCTGTGGCG  
GCTATCGCGCGTCGTGCTTCTCACTCAGCTTGCAGGTACGCTTATGATGGGTGGCCACTCGGGCAATTCAG  
GAAGTAAGGGGAGCCACATGGGGCTGCTGAGCTATACCGTCGCTCTTGCCGAATAGTGGTTTGGCTCAG  
TGGGTCGTCGTGGAGCAGATCATCTTTTCTGATAGTTGCATGTCAGGGGACTTGCGGGTCACAGCAGCGC  
AATTAAACCGGCTCAGTAGTAATGGATGGCCTTGGAACAGGCCGGTGGCGTTTCAGGGGTGCTGGATAG  
GACCCCAAGAAGCTGTTGTGCTATTTATATTTTGTGTTGGATGGACGATGCCTAGGCAGTCGCTCGCACCG

AATTGAGTATTTGGCCCCGTTGACCGTCGTAGGCGCATCGTCTTTATTTGCAGGACAGCAGCTTCAGCGTC  
GTGGTTTGGAAACATCTAGTGGCGTCTCTCACCTCCACAACCTTGTCAGGAATTGCATGTCAGCTGACTT  
GGCGGCCGCAGCAACGTATTGGGTGGCCCGCAAAACAGGCCGGTAGCGATACAGATTGCTAGAATGGAG  
CCCAACAGGGAGCTGCTGAGCTGTTGCATATTTTGTGTTGAGAGGAGGATGCCGGAGCCGTCTCTTATTCCA  
GATTGGGTATTTAACCAGCAGGCCTTCGTGGAGCATGTCATCTTCTTGGTAAGTATGTATTTTAAACAGTT  
TTTTTATTTTTGTGTTATGTGCCTTTGCTTGCAGGACAGCGCATCATCGTCGTGGTTTGGAAATATCTAGTGG  
CGTCTCTCACCTCCACAACCTTGTCAGGAATTGTTTTTTTTTTTTTTTTTTTTTTTAACTTGGCCGCCAG  
AAAGATACTGACGGTGTCTTTATTTTTAATTTAACTCATTACTTTAACATAGCAACTTATTTTAAATTTAAA  
TGGCAACAGAAGTTTTTATAATATGTGGGCAAAACATTTTGCAGCCCTGTTACAGCGTGTCTGGTATTTTCT  
TATATACTAACTTATCGGCTAAACGCATTTTTTGGTATTTTAATTTGCAACGATAGTTTTCGTCCTATATTAC  
TCATCTTTAGGAGCGGCATCAATGGCAGCGTTTCCTGAGTTTGGCCTAGTAAATCGCCGTGGGAACCTGCG  
TCTTCTTGAAGCAGTGGCATCAATCTCTGTGGCGGCTATCGCGCGTCGTGCTTCTCACTCAGCTTGCAGGT  
ACGCTTATGATGGGTGGCCACTCGGGCAATTCAGGAAGTAAGGGGAGCCACATGGGGCTGCTGAGCTAT  
ACCGTCGCTCTTGCCGAATAGTGGTTTGGCTCAGTGGGTCTGTCGTGGAGCAGATCATCTTGTCTGATAGTT  
GCATGTCAGTGGACTTGGCGGTACAGCAGCGCATTAAACCGGCTCAGTAGTAATGGATGGCCTGGAAAA  
CAGGCCGGTGGCGTTTCAGGGTGTGGATAGGACCCCAAGAAGCTGTTGTGCTATTTATATTTTGTGTTGG  
ATGGACGATGCCTAGGCAGTCGCTCGCACCGAATTGAGTATTTGGCCCCGTTGACCGTCGTAGGCGCATC  
GTCTTTATTTGCAGGACAGCACTTCAGCGTCATGGTTTGGAAAGCATCTAGTGACGTCTCTCACACTCCACA  
ACTTGTCCAGGAATTGCATGTCAGCTGACTTGGCGGCCGCAGCAACGTATTTGGGTGGCCCGCAAAACAGG  
CCGGTTGCAGTTCAGGATGCTAGATGGAGCCCAAGGAGCTGCTGAGCTGTTGCATAGTTTGTGTTGAGT  
GGGCGATGCCGAGGCCGTCGCTCACTCCAAATTGAGATTTTAGCCAGCAGGCCGTCGTGGAGCATATCAT  
CTTCTTGGTAAGTATGTATTTTAAACAATGTTTATTTATGTACCTTTGGCTTGCAGGACAGCGCATCATCGT  
CGTGGTTTGGAAACATCTAGTGGCGTCTCTCACCTCCACAACCTTGTCAGGAATTGCATGTCAGCTGACT  
TGGCGGCCGCAGCAGCGTATTGGGTGGCCCGCAAAACAGGCCGGTGCAGTTCAGGATGCTAGATGGAGCC  
CACAAGGAGCTGCCGAGCTGTTGCATACTTTGTTTGAGTGGGCGATGCCGAAGCCGTCGCTCACTCCAAA  
TTGAGTATTTAACCAGCAGGTCTGTCGTGGAGCATATCATCTTCTTGGTAACAGTGTTTATTGTGTGCCTCT  
GCTTGCAGGACAGCGCATCATCGTCGTGGTCTGGAAACATCCAGTAGCGTCTCTCACACGCCATGCAGTTT  
GACCAGCAATTGTTTGGATGGACGATACCGAAGCAATCGCTCACCTCAAATTGAGTACTTGGCCAGTCG  
ACCGTCGTAGGCGCATCGTCTTTATTTGGGGGACAGCACTTAGTGTAGTGGTTTGGAAACATCTGTTGGCG  
TCTCTCACTCGCCACGAAGCTTGCCTAGGAATTGCATGTCAGTTGGCTTGGCGGTACAGCAACGCCTTCA  
ATCGGCTCAATAGTTATGGATGGCCTGGAGGCAGGCCGGTAGCGATTGCTAGATGGAGCCCAAC  
AGTCGCTGCTGAGCTGTTGCATATTTTGTGTTGAGAGGGCGATGCCGGAGCCGTCTCTTACTCCAGATTGGG  
TATTTAACCAGCAGGCCTTCGTGGAGCATGTCATCTTCTTGGTAAGTATGTATTTTAAACAGTTTTTTTTATT  
TTTTATTTATGTGCCTTTGCTTGCAGGACAGCGCATCATCGTCGTGGTTTGGAAACATCTAGTGGCGTCTCTC  
ACCCTCCACACAACCTTGTCAGGAATTGTTTTTTTTTTTTTTTTTTTTTTTAACTTGGCCGCCAGAAAGAT  
ACTGACGGTGTCTTTATTTTTTAATTTAACTCATTACTTTAACATAGCAACTTATTTTAAATTTAAATGGCAA  
CAGAAGTTTTTATAAATATGTGGGCAAAACATTTTGCAGCCCTGTTACAGCGTGTCTGGTATTTTCTTATAT  
ACTAACTTATCGGCTAAACGCATTTTTTGGTATTTTAATTTGCAACGATAGTTTTTCGTCCTATATTACTCATC  
TTTAGGAGCGGCATCAATGGCAGCGTTTCCTGAGTTTGGCCTAGTAAATCGCCGTGGGAACCTGCGTCTTC  
TTGAAGCAGTGGCATCAATCTCTGTGGCGGCTATCGCGCGTCGTGCTTCTCACTCAGCTTGCAGGTACGCT  
TATGATGGGTGGCCACTCGGGCAATTCAGGAAGTAAGGGGAGCCACATGGGGCTGCTGAGCTATACCGT  
CGCTCTTGCCGAATAGTGGTTTGGCTCAGTGGGTCTGTCGTGGAGCAGATCATCTTGTCTGATAGTTGCATG  
TCAGTGGACTTGGCGGTACAGCAGCGCATTAAACCGGCTCAGTAGTAATGGATGGCCTGGAAAACAGGC  
CGGTGGCGTTTCAGGGTGTGGATAGGACCCCAAGAAGCTGTTGTGCTATTTATATTTTGTGTTGGATGGA  
CGATGCCTAGGCAGTCGCTCGCACCGAATTGAGTATTTGGCCCCGTTGACCGTCGTAGGCGCATCGTCTTT  
AATTTGCAGGACAGCACTTCAGCGTCCTGGTTGGAAACAA

>Ref\_Uvir

CACCTCATCACACCTTCATATCTTTTATATTTACGCCCTATAAATATAAATTTATCTCTTTCTGGTGTACCA  
TCACCAAAAACCATACTTTACTTACCTTCACACAAACTGCTCGCATGATTGGCCTCCGTATTGGCATTGG  
CATGCCAATGGTTTGTCAAACAAAACCTGACGAGCTAGAGCAATTTATAATACGTCATAATGTCGATCTAA  
TGCTTATAAGCGAGACTCGCTTCAACTTCAACTCTCGTGTCCAAATCCCTGGATACTCCATCATAACGGCC  
AACTCACCCCAAACCTCACTTATGCATTGGTGGTGCAGCCATCCTAATCTCAAACCATCGAATATCAAGC  
TCTTCCAGGCATATCACTGCCACAATTACAATGTGCTATTGTGCGCCTCCGTACAGATCTGGGTGGTGCCA  
ACATTGCGTCCTGCTACTGGCCCCCAATCACGCAGTCTTAGCAGACGACTATGTCTGCTTATTTAACCAA

TTGGGTGAAAACCTTTCTGATTGGAGGGGATTGGAATGCCAAGCATCGCCTCTGGGGCAACATGCGACGTT  
GTCCTCGTGGCTCGATCCTTGCAAACATTCTAATGGACTCCAACAAATATAACGTACTCACAACGGCTGAG  
CCAACACACTTCCCATCTAATAGCAATCGTCCAAGTGTACTCGACTTTGGCATCTATGCAGGTATCTCGAG  
TCATAGGCTTGCCATAAGTCGAGTCACAGAGCTCCATAGCGACCATCTGCCCTTGCTAGTCCAACTCAAAA  
TCACCATTAACGGTCAAAGTCTATGGAATAATCCTAACCTAATTCATCGGTCACGCCCCCGCCGGCGAAA  
CCGTCACCGTCTACTCACCGAACGCTCAAACCTGGAGATTTTTTCATCAAAAATTGGAATCATCCATCAATC  
TCAATATTGAGATTGATTGTATAAATGACATCGATGATATGCTCGAAAATTTTATGTCCAAGCTGCACATT  
GCAGCCGAAGCGTCAAATTCTCGATCAGCCATGGCATCCATTATACCCCCGCATCAAAAACAGCTCCAATA  
ACACACTCAATAACGAAAACAATAACAATGTCAATCTCGACTTATCGTCACCTCAACCATTACCACTGTCC  
GCTTTTATCAGAACAGACGAACATCGCGAATTGATGCGACTAAAACGCCGTCTCCGTAAACGCTGGGCAC  
GCACGCGTCAACTTGATCACTGGCTTGAATGGCAGCGGGTTGGCCGACAACCTGGCCAACCAGCTTGAACA  
ACAACGCCGTGATTACGTTGACTACGTGCTGAGCAATGCAGACCCTCAAAGAAGGGCGCCTTCAACCTG  
TGGCATGCCACAAAATATTTAAAACGACAACCCCATGCTCAACCCAGTGTTTCGCAACCTCAACGGTCACT  
GGTGCCAGTCTGCCGAAGAGCAGGCTGAAGCATTGTGCCGATGAGCTACAAGCACGTTTCACACCATTCAA  
CCTTGCCCCATCAGGACAATGCGAACGTGTGAAGCGCACACTCAATCAACAAGTCAACTTATATGACAAC  
ACTCTAAACGCAATCAATCCTCAATATCCCATTTCTATCATCACACATACGCCATGTAACACTATGCGAGCT  
AAATACTTACATTGGGCATCTACAAATGCGTAAAGCACCGGGGCTCGATCAAATTGATAACTATTTGATC  
AGGTCCTTGCCTCAAAAAGCCAGACTTTTCTTGTGCTACTATTCAATGGCATGCTTCGACTACGGTATTTT  
CCATCAGCATGGAAATGTGCCGCCGTCCGGATGATATTGAAAAGTGGCAATCGGTCAGCTGCAAACCTCA  
ACTCTTACCGGCCAATAAGCCTATTATCTACGATCTCGAAACTATTTGAGAAAGTGATATATGAGCGGCTA  
AATGACGAATTACAATCTCCACTAGAGAGCGAATCTGAATTAGAGTGCTCCAGAGTGATCCCGAACCATC  
AATTCGGTTTCCGCTCTGGTCACGGCACCATCCAACAAGTGCATCGGATTGTGCGAGCACATAAACAACCTC  
ATTTGAAAGGGGGCCACTGCACCTCGGGAGCTTTTCTCGATCTGCAGCAAGCTTTTGATCGTGTCTGGCATG  
ACGGTTTACTATTCAAACCTGCGCACACACACGAGTGAACCCCTCTATCAATTACTCAAATCATTCTATCA  
AATCGTAGTTTCTGTGTATTAAGCACAAATCCGACAACAATGGCAACAGAGGTGCCGACGCCTGCCACT  
CGACACTACGACCAATGGTGGCCGGTGTGCCGACGGGCAGCGTGCTGGCTCCACTATTATTCAATATATTC  
GTCTCAGACATGCCATGCATTGCTACGCACATACAACAAGTGTTCCAACCGCCGCCCGGCCAAACAACA  
CCAGCATAATTGGTCTAACAGCCACCTACGCCGATGACACAGCATTCTTATGCAGTGCCATGAACGCAGT  
GGTGGCCACCACCATTTCTGCAGGGTCATATGCATCGATTTGTAAATGGGCCAATAACTGGAACATTCAA  
ATCAATGACAACAATCGGTGCATATTATCTTTACCCTAAGGCGCCAGATTGCCAATGCTGGCAGCCTAA  
CAACACAACATAACAATAAACAACAATATCATACCGGCCAAGAGCTATGTCAAATATCTGGGTCTGAATTT  
GGACAAAAAATTAATTGGGCACGTCATGCCCCTTTACAGCACAAATTGTGCGCAAAAAAAGTGTTCAAAC  
ACAAATGGCTACTATCTGCCAGCCAATCCAGATTATCATTAATAAACAATAATTGCTTATTTATCGACAGATC  
ATAGCCCCCACCTGGCACTACGGCATTGAACTCTATGGCTGTGCAGCTGACACGCATCTGCGCCGTCTAC  
AACTGCACAGTCGCGAGCTCTTCGCCTCATTAGCGGTGCACCATATTATATTACAAATCGCACACTGCAC  
CGAGTAATGAAAGTGCCATCAATATGGGACCAGCTCAATCTAAACGCCAGTCGGCACAACGACCGACTGG  
AAAAACACACTAACAAAATGGCTAGCACGCTATTGCTTTACGGTGGACACCGAGCCCAACGCCGTCTCCG  
ACGTATCTGGCCAGGCATTGAATTAATTCAACGCCAAGCGCCCGCCAACCTTTTTTAAATAACTACACTAA  
TAATCAAAAATGTGACACCCCTCATGGGACACACATTCACCCACGAAAAATACTTTTTCCAAACATCATA  
AATAAACACTTTAGTTTAGGTAACCTCACTCACCTTATCCCATGGCGAGCCCATAGAAACACTTGTACAT  
GGATTCAAAAATAACGGCAAATATATTATGCCGCAATTATTTTTGATGACAGCCGCTAAGCCGCAGCTAAT  
GACAACAAGAAACAGCAGCAGAAGAAGAAGCAGCGGCTAAAACAGCAGCAGAAGCATTGGTAGCAGAC  
GAAGACAAAACGGCAGCAGAATGCAACAGCTACATCAACATCAACTATAAGCACGCCCAAATAACCATA  
CCAATACAATCAAATCAGAAATTACACATGTAATATACACAATCACATTCATACCAAATATAATACAAAA  
ATAATACATTCTCAATCAGCTGTAATACACACACTCACAATACTCACATAAGCTATAATACACCTATTAGA  
TAAAATACACATATTTACTCTAACACTGGCATAACACATATGCTCACACTCGAATCAAAACAAAAAACCAA  
TTTTACTCACTCATCAAAAAAGACAATGAATATCAGGTAAAGTTATATCACCCGATTCCCCTCCCCACCC  
ACAAATCATAATGCCGATTGCTGGCGGCAACCAAATTAAGTCCGCGAGAGAAGGCATTTCAAAAACGGCC  
TGCTGCCTAGCTACAAATATATATATATATATGCGTACTCATACACATATATGTACATATTCTAAAAATAA  
TCCCCTTTATCCCACCAAAACAATTGATAACGCAGTGGCAATGTCAATGTGTCAAAATTGCATAGTCTACG  
AATGATGACAGCAGTATCAATTTTTGCTAAAAACTAATTAATATGCTGAATACATCTGGAGACAATTTGCA  
CGCACACACACAAATCCGCTCGCATCAATATACTCCACATATCACAACAATTTACATCTCACAACATTC  
TAGCAAATATAACAATTAATTTCTCTCAAACATACATTCTTACAAAAAGATACTCTATCAAAACTGCTG  
GCTTATGGCGAACTAGTTTTGCTGATGCCGCACCTTTCACCCTAAATTATATATTACACTAAACAATAATCA

TAAATAATCTTAACAAAACTCTACCACATCAAGCCCATACAAAAAATATGGAGCATTCACTTGAAGACG  
TGTGCAATCGCGACAAATGAATTATTCCTAAGTCAGTTCGGCCACTTAATACCCATATGTATACTCATTT  
GTCTATACTGCGCACACACACTCTCTTCACACTTATGCCAAATTACACACAACCACCACAAAATATAA  
CTTTATAACACTTTCAAATCAAAACCTCATGCACACATATACACATAAAAAATTGTATAGCTTAAGAAATAC  
TTTTTAAGAAATCAAAATTTATAACGTTATGCACAAATAGTAATATATAATTTTAAAG  
>160\_rnd-1\_family-129\_\_LTR\_\_Gypsy  
GACAAAAGCAAGAAGANACCGAANTAGTCGACATGGCNCAAACAGCTGTAGAATTTCTCAAGCTAGCCT  
CATCGCTCTTACCAGAGTTTGACGGCAAGGCGGAAAATTTAAAAAGCTTCATAGATGCTCTGAATCTGGT  
AGANTCCCTAAAAGAAACACACGAAGCACTNGCCGTAAGTCTTATTAAGACAAAACCTAAAAGGCCATGC  
CAGGAACCTGATAAGTGATGAGAACACTATTGCAGCNCTCATATCGAACTATCGGACGAAGTAAAAGG  
AGAGTCGGTAGAAGTTGTNTCTGCTAAGCTTCTAACTTGCAACAAAAGAGCAAAACGGCCAACCAATAT  
ACCCAAGAGGTGGAAAAAAAAGGCCCTTGAAGGAGCCTATATCAGTGAAGGTCTAAGCCAATCACTTAC  
AGCACTACAACAGCCGTAAAAGCTATGACCCAAAATTGTTTCGATTGATAAGGTAAAACCTTATCATGCAGG  
CAGGCACATTCACAAATATGAATGATGCCGTCTCCAAATTTGTCAATAGTTGCACGGAGGTAACAGGTCA  
AAGTAACACTGTCCTGTATTATCGACGAGGTGCAAANCAAAATAATAGACGAGGCGGAAGTTACAATCGT  
GGCAGAACTACAGCCGCAACAATTGTAACCGCGGCGGTGGTAACAACAACAATAATTACAATAAC  
CGTGGAGGAAGACGAGGCCGAAATNGAGGAAGCAATTCAAGCCGAGGCAAANCCAACAACGGTAACAA  
TAGNAACAATGTNAGAGTGGCNCAAATACGTTCGGAAAACCTCTCAGAACCCTTTAGGAAACAACCAGTA  
AATGCAAAGGTTTCATACCATCAATCTCAGTCTTAATATATTTGTCACATTTTTATAATCATNCGACTGAAA  
ATAAACTCGCATTCTTAATAGATACTGGTGCAGATATCTCACTNTTAAAAGAAAATTCAGATATATTTCAA  
AATTCAAGAAGANAAAATTATAAACATCCAAGGCATNGGCCAAGGCGTAATAAAATCNAAGGANCAAC  
TTCAATAGAACTNCAGNCAACNAAATATATAATTCCACACGANTTTCATTTAGTAGATTTCGGATTTCNCAA  
TACCGTGTGATGGAATAATAGGCATTGATTTTATTAATAAAATTCATTGCCAATTAGATTTCAAACCAAGT  
GAAGACTGGCTTATAATTAGACCTCAAACTTAAATTATCCAATTTATGTTCCAATAACATATAGTTCTGG  
CAACAATGCAATTCTTCTGCCAGCCAGATCCCAAGTAATCCGAAAAATANACATTAATTTCAGTAAAAGAT  
NATATATTTGTTCCAAATCAAGAAATANATAATGGAATTTACGTTGCAAATACAATAGCAGCATCCAAAC  
ATGCATACGTTTCGCTTCTAAACACAACNAATNTCGACCAATTGGTCAANGTAAACAAAATCGAATATGA  
AAATTTAACGAATTACGATATTCATAAACTAATCCAGAAAATAGAAGAGACAAGTACTTTCAAATTA  
AAGAAAAATTTTCCACCACAATTCAAAAATCAATTAACAGANTTATGCACCAAGTATAGTGACGTATTCG  
GACTGGAAACCGAACCAATAGCGACAAATAATTTTTATAAACAAAACTAAGACTNAAAGATGATGAAC  
CCGTNTATATAAAAACTACAGAAGCCCGCATAGCCAAGTNGAAGAAATNCAAAAACAAGTAGGGAAAT  
TAATAGACGACAAAATCGTCGAACCGTCTGTATCCGAGTATAACAGCCCACTCTTGCTAGTTCCGAAAAA  
ATCATTTCCAGATTTCGGAAGAAAAGAAATGGCGATTAGTAATTGACTATCGTCAAATTAATAAAAACTA  
CTNTCCGACAAATTCCCGCTCCCCAGAATTGATGATATTCTAGATCAACTGGGCAGAGCAAAATACTTTTC  
ATGCCTTGACTTAATGTCAGGCTTTCACCAAATTGAACTCGAAAAAAGTTCAAGAAATATAACGTCTTTTT  
CAACGAGCAATGGCTCGTATCGCTTCACGCGATTACCATTTGGTCTNAAAATAGCGCCAAATTCATTTTCA  
AGAATGATGACAATAGCATTCTCNGGTTTAGAACCNTCTCAGGCATTCCTTTATATGGATGACTTAATAGT  
GATNGGTTGTTCCGAAAAACACATGNTTAAAAACTTAACTGATGTTTTTCGACGAATGTAGGAAATACAAC  
CTAAAGTTACATCCAGAAAAATGTTCAATTTTTTCATGCATGAAGTGACATTTTTGGGTCACAAATGCACTGA  
TAAAGGAGTATTGCCAGACGACAAGAAATNCGACGTCATCAAAAATTACCCAGTCCCACACGATGCGGA  
CAGCGCGAGACGATTTCGTAGCATTCTGCAATTATTATNGNCGNTTTATAAAAACTTCGCCGACTATTTCAC  
GGCACATAACNAGATTATGTAAAAAGAATGTTCTNTTTCGAATGGNCANNTGAATGCCAAAACGCATTCCA  
ATACCTCAAAGNAGCGCTNATGNACCCNACNTTGTACAAATATCCNGATTTCCGCAAAGAATTTTGCATN  
ATAACAGATGCNAGTAAGCAAGCGTGCGGAGCGGTTTTAACTCAGAACCGTAACGGACTCCAACCTCCAA  
TTGCATACGCATCAAGNTCNTTTACTAAAGGGGAAAGCAATAAGAGTACAACAGAACAAGAGTTAGCGG  
CAATTCATTGGGCAATAACNCATTTTNGACCATATATTTATGGCAAACACTTCACNGTTAAAACGGATCAC  
AGACCATTAACATATCTNTTTTCAATGGTCAATCCNAGTTCGAAATTAACNCGTATGAGGCTNGAGCTNG  
AAGAATACGACTTCACGGTAGAATACCTAAAGGGNAAAGACAATTTTCGTAGCAGACGCGCTATCGAGAA  
TAACCATNAAAGAGCTANAAGATATAACGGNAACATAAGTCCTGAAAGTCACTACCAGGGCGNCAAAGTA  
GACAAAAATCCTGCGCAGGAGAGAAAANNAAATAGAATTGCCAAGGCAATCTATAGAAAANGCNTCNAAGC  
CCAACGTATACGAAGTCATTAACAATGACGAAGTACGAAAAGTAGTGACCTTGCGCGTAACAGAATATGA  
TATGTTTATTTAAACATGGNAANAAAATTACCGCAAGANNCGANGTTAGCGATTTATATACCAATGGAAT  
CCTCGACTTAGGTCAATTCTTCCAAAGGCTCGAAACGGAAGCCGGTATATNNAAAATCAGCCAACCTCAA  
GTGGCACCGTGGGAAAATATCTTTGAACAGTTTCAATAGATAATTTCAAAAATATGGGCAATAAAATATT

AAANTCNTTAAGAGTAGCGCTACTCCACCCGGTGACCCAAATANAAACGATAAAAAGAGANACAAGCNAT  
ATTGTCTACATNCCATGACGACCCAATNCAAGGAGGTCATACCGGCATNACAAGAACCTTGGCNAAAGTN  
AAAAGACACTACTACTGGAAAGGTATGACNCGNCATATNAAAGAGTACGTACGTAGATGTCAAAAATGC  
CAAANGTCTAAAACAAAGACGCACACAAAAACTCCTTTAACTATAACNGANACACCTGTGAATGCTTTTCG  
ACAGAGTGATAGTGGACACAATTGGTCCGCTACCCAAATCGGAAAATGGTAATGAATACGCAGTCAACATT  
AATNTGCGACCTNACNAAATATCTAGTCGCGATTCCAATACCAAACAAAAGCGCNAATACNGTCGCAAAA  
GCTATATTTCGAAAATTTTATACTCAAGTACGGTCCAATGAAGACGTTTATTACGGACATGGGAACAGAAT  
ACAAGAAGTTCGATTATAAATGATTTGTGCAAGTATNTGAAAATNAAGAATATAACATCNACTGCACATCA  
TCACCAGACAGTTGGAACAGTNGAAAGAAGTCACAGAACTTTTAACGAATACATACGTTTCATATATATCG  
GTNGATAAAACTGATTGGGACGTATGGNTCCAATATTTTCGTTTATTGCTTCAACACGACCCCATCNACGGC  
GCATGANTATTGTCCGTACGAAGTAGTATTTGGTAGACTACAAACAATTCATCAAAAATATTNAATAGNAC  
NGATAACATAGANCCTATATATAATNTAGATGACTATGCTAAGGAAAGTAAGTNTAGATTAGAAATAGCA  
TACAAAAGAGCTAGAATTATGTTAGAANAAGATAAGGCNTATAGGAAATTAGCATATGACGAAAAAACA  
AAAAACTTNGAATTANAAGTAGGAGATAAAGTNCTANTAAGAAACGAAACAGGNCATAAATTAGATCCA  
GTATATTTAGGACCATATANAGTAGAAAAAATAGAAGATAANGATAACATNTTAATTANGGATAGTAAA  
AATAAAAAACAAANAGTNCATAAGGATAGATTAAAAATTTTAAATTCATAATCGAANATTCTAATATGAA  
TACAAAGAAAAATATAAAATAAAANAAAAAATATAACGGAATAATAAAATGAAAAAAAAAAAAATNTA  
AATAAAAAATAAAAATTATNAATTNTTATAGAAAATAACTCTATTGTATTACGCTCCAACNTTTNAAA  
>Ref\_NewTE2  
TTGTTAAAATAGTGACAATAAGCTGTTAAGCTTCTTTATAATCTGGCAACATTGTATCAGCACAGTACTCA  
TTCTGTAATTGAGTACTTGTTCAGATTTTTGTACTCATGCTTTGAAGTTTCCATTAAACATTTAACCGAACC  
ACTACGTGTGTTTTCTTTATGTGCATCTTAGGCACACTAGAAATTTCCCAACATTGGTTATGGGCCCAGGT  
CTCGTTGTTTTTCGGTTAAATAAGTACACAAAGTGTCTATGGTTTTGAAAGCTTCCTTTTGTAAATTTTTAA  
AAAGTTTATTTTCGTGCGAAGAATAACGTGGTGAAATTGTCAAAATGAACATGTTCGCATCAAAATAGAAAAA  
CTTGGTGAGGACAATTATGACGTATGGCATATGGCCATGAAAAGTGTCTTGGTGGTGGCGGACCTATGGA  
ATGTTGTGTGTGGAATAATATGTTAAGCCAGAAGGAAATGGTGAGGATATCGAAAAATGGGTAGTGTGCGA  
CCAAAAAGCGATGGCTTACATAATTTTAAATCTGAAGCCAACACAGTTGATGCATATCAAGTCATGCCCA  
ACATCTGCAGCTGTATGGAAAAAACTAAAGGAAATTCATGTCTCAGTTGGACCGATTAGGAAGGTCCAAT  
TATATCAAAAATTAATACGTTTCAATATGCAGCAGGGTGACGATGTAGTCGCATATGTCAATTCATTTGTT  
GAGACAATTGAAAAGTTGGCAGAATTAGACATCAAACCTCAATGACGAGTTGCAGGTCATCATGTTTTTGA  
GCAGTCTACCAGACACATGGGAAAATTTTGTAAATAGCGATTGAGACACGCGATGAGCTGCCCAAATTCGA  
AGTCGTCAAGGTTAAAATGTTAGAAGAGGGCCACGCGAAAGCAAGAAAGAGCTAGCAGAGACGGCATAGG  
GACACCAGAAGCAGTGTATACACACAAACATAATGGACCGCGGGACAACAACAGTGTGGAAGCAAAGG  
CAGAAAGAATAGCAGTAAGCAGCCATTCCGAGGCAAATGTTTTAATTGCGAAAAAGAAGGGCATCGAGC  
GAGCGATTGCCGAAATAAAAAAGAAGGATGATAAAAAGAGCCAAAAGGACGAAAAGTCTCTATGCTTAAT  
GCACACGTGTGTCAAGGAGAAGCAAAAGAGTTTTTGGTGCGTTGACAGTGGTGCAACATCGCACATGTGC  
TGCGACCGCAGCATGTTCCCTTACGTATGCTGATAAAAAGACGTGATAATGTTGGCCGCAAATAAGTTTAT  
CGATTACCCCGGCAGTGGCAGTGTGAGTTGCACTGCAATAGAATAAAAATTAAAGCTGCAAAATGTTTTA  
TATGTCCCTGACTTAAGCATGAATTTTTTATCAGTAAGTGCTGCAGCAAAGTTTGAGAATTCTACCATATT  
TGAAGGGAAAATTGCGCTGATAAAAGACAAAGAAGGCAACGAGATAATAAGGGCAAGACACGAAAATG  
GTTTGTATGTTTACAAACATAGTCTTGATCAGGTTTCATATGCTAAATAGTTCTGATTCATCTTCCATAAAAT  
GGCACAATAGATTTGGCCACCTGAATTTTAAGGATTTGAAATTGCTTAATGATAAGCAACTGGTGCGTGGT  
ATGAAAGTTGAAAATGTACAATTAGAAATAAATTGCGATACATGTAATAAAGCAAAAATTTGTGCATTGC  
CATTTCCACAGAAAGCGAATCGTGTCTCAAAGCAAGTACTGGACTTAGTACATACAGACGTATGTGGTCC  
GATGAATGTTAAGTCGCTTGCAGGCAATCGATATTTTCGTAACCTTTTATTGATGACTACTCACGCAAGATAT  
TTGTTTACCTTATGCACTCAAAAAGCCAAGTTTTTGAAGTTTAAATGTTTAAACCTTTTGTAGAATGC  
CAAACAGGAAATAAAATAAAGGCTGTGCGCAGCGACAATGGAACAGAGTATGTGAATAAGCAATTCCT  
GAATTTTTGATCGAGTGCGGTATAAAGAGGCAATTAACAGTTCCCTTAACTCCGCAGCAAAATGGTGTGG  
CCGAACGTGCTAATCGGACCATCGTTGAAATGGCAAAAAGTCTTCTAATTCATTCAAAGCTTGAAGAATTT  
TTGTGGGCAGAGGCTGTTGCAACAGCAGTTTATTTGCGCAACAGATGTCCACAAAAGCATTAGATGGAA  
GCACACCATTTGAGGTATGGAAGGATCGCAAGCCATCAGTACAGCACTTGAGAGTATTTGGCTCGCGGGC  
ATTTGCACTCGACAAAGTCAGAAAAAGCAAGTTCCAAGCAAAGGGCAAGGAGTACATTTTTGTTGGTTAC  
TCCTTTACAGCAAAGGCATATCGCCTATATGATCGCGAGAAGCGAACAGTTATTGAAAGAAGGGATGTCA  
AATTCATTGAAGGTGAGTTTGACATAGCAACAACCTGATGCATGCAGTATTTTCAGACAGAAACACCTTCAC

GACGTACATTATCCCGTTTGTAGTCAAATCATGAGGTTGCAAAAAACCCAGAGCAACCTGCCGAGGTG  
CAAGAGTACAACAGTGAATGAAGAAGAAGAGGAGGATTTTGTGAGCGCAAGCGATCCAGGAGAA  
GATGGCAACGATGACGACAATGACCAAGTAGCGCTGCCACAAGTTGAAGCTGTAGTAAAACATGGGCGT  
GGCAGGCCAAAAATTATACGTACAGGTCAGCCAGGCAGGCCAGAAAAGCAGTACCAATTGATCAATAGT  
CTTAATCAGATTGAAGACATTGAAACTCCGCAGTCAGTTGCAGAAGCATTACATGGCCAAAATGCGCAGG  
ATTGGGAAAAGTCTATGCAAATAGAGTACGACGCTTTACAAGCAAATGAGACATGGTCAGTGTGTGAGCT  
ACCTCCTGGACAAAAGGCCATTGGTTCAAAAATGGGTTTACCGAATCAAGAGAGATAAAGATGGTAATATT  
GAAAAATTTAAGTCTCGACTAGTTGCACAAGGTTGTGGTCAACAATTTGGTGTCAATTACTGGGAAACGTT  
TTCTCCCGTAATTCGATATGAAACCATTTCGCATGTTATTCGCAATAGCTGCCGAAAAAGAGCTGTATATGC  
ATCAAGTCGACATTTCAAACGCATACTTAAATAGTAAGCTTAATGAAACTGTGTACATGAAACAGCCGCC  
GAATTTTATTGACAAGCAGCATCCAAATAAAGTCCTCAAAGTGAAGGCACTTTACGGGCTTAAACAA  
TCCGGACGAGTTTGAACAATACGCTCGATGAGGTATTGAGAGGCATGGATTTTAAAAGATGCAAAAATG  
AAGCATGCTTATACGTCAAGCAAAAGCAACAACAATTCAGCTACATCGCTGTCTACGTCGACGATTTAAT  
CATAGTGTGTCCCAGCGAAGAAGACATAGCCGTGATTAAGAAGAAGATTGCATCAAATTTTAAAATGCAC  
GATGGAGGCCCATTAGCTATTTCTAGGCATGGAAATCCAACGCGACGGCGATCGAGGTTCCGTTTCGC  
TGTGCCAGAAGACGCACATTCAAGGCCTATTGGACAAGTATGGCATGAGCAATTGCCGTCAGTAAGCAC  
ACCTCTTGACCCAGGTTTTCAAGTGGACTGCAACGACGATACTTGTGTAAAGGTAAATATAACGCAATAT  
CAGTCATTAATTGGTTCGCTTATATACTTAGCAGTTTTGAGCCGACCAGACATTTTGCATGCTGTAAACAA  
ATTATCACAAGAAATGCTAATCCTCATGGAGAACACCAGTCTGCAGCAAAGCACATTCTAAGATATCTT  
GCGGGTACAAAGAATATGAAATTAGTATACCGTAAAAATGGCAAACCACTAAAAGGCTATGCAGATGCA  
GATTGGGGCAACGATCGGCTGGACAGGAGATCCTATAGTGGCTACGCATTTTCTCTGGCAGGCAGTGCCT  
TCTCTTGACTTCATCAAAGCAAAGCGTTGTTCGCATTGAGCAGCACTGAAGCAGAATATATTTCTTTGTCC  
ATGGCTGCCAAAGAAGCAGTTTATCTACGCAGGCTACTTAGTGAGATGGGATGGTCAAAGGATACAGAGC  
CGTTGACTATATGTGGCGACAACCTAAGCGCGCAACATATTGCGCAAAATCCAGTCCATCATAAGCGCAC  
TAAGCACATAGACATAAGGTATCATTTTATACGTGAAAAGGTACAATGTAATGATATTGCATTAGAATAC  
GTACCTACAAATAATAATGTTGCAGATATACTAACAAAATGTTTAAGTAAGCAAAAGCACGTAGGCTTTG  
TAAAAACACTTGGATTGAATTAATTTGTTATTTTGAACCTGATTATAATTAGCTTAAGAAGAAGTGTTAA  
AATAGTGACAATAAGCTGTAAAGCTTCTTTATAATCTGGCAACATTGTATCAGCACAGTACTCATTCTGTA  
ATTGAGTACTTGTTCAGATTTTGTACTCATGCTTTGAAGTTTCCATTAAACATTTAACCGAACCCTACGT  
GTGTTTTCTTTATGTGCATCTTAGGCACACTAGAAATTTCCCAACAAATTTGACAT

>160\_rnd-1\_family-346\_\_LTR\_\_Gypsy

TGTGAGGCGGCTAATGAGACCAGCCACCCACAGTTTTTCACGGCAAGGAGCCGTCATCCCTTTGGCCAAA  
TTACGGCAAGGAGCCGCTGGCGGGACAACGTATTAATTTCTTTAGTTATAAGTATTAATTATATTAGGTT  
AAGATCTTAGTGAAATAAGAGGCAAGGAGCCATCAGTAATATAAGCAGTTCGATTAGTAGCAAAGAGGC  
AAGGAGCCGCGAATATTATAATTGATTTAAATAGTGAGTTTGAATTTAACCGCCGGCCGCGCTGCAACC  
GTGCGTTGTTCGATCGGTTGCTCAACACCGTCTTTGAGAGCGCAACTTCAATTCGGCGGCGAAGAGCGAAA  
GCTCCGAGGCGAAGTTGCGAAAGCTCGCGGCGAAGTTGAGCAGCCGAAGCGAGCGCATGGCTTGCCGGC  
GAGCGTGCCGGCACTTGTGATCGAACGTTAAGGGTGAGTAGAAGTGCTGCGCGAGATAAACGAAATCAT  
AGATGGTATAGTGAGCGCTAGGGCTCCAGAAAACAGTGCGGCAGGGTTTAGCTTAGGATTTACGATAAG  
GTCGGAATGAATAATAGTGAATAAAGTGCCAACGTTGTAATTATCTAGAAAGTATTGGATTATTCCTGTT  
TCCTGGTAACCCGGCTTACCTTAACATCGGAACCTAACCGGTGTTGACCTAACCTCGAACGAGGGGCATG  
CGGTACGAGATTGTGGCTCCGGGGTGGGCATTGCCGGTCGGCGTCTAGGTAGTGGAGTTGGTGCGAGGCC  
ACGGCCCGCTAGTGTAGTTGGTGCGAGGCCACGGCCCGCTAGCATAGTGGTACGAGGCCACGGCCCGGCA  
GAAAGATAGAGCGTTAGGTAGTGGAGTTGGTGCGAGGCCACGGCCCGCTAGTGTGGTTGGNGCGAGGCC  
ACGGCCCGCTAGCATAGATGGTACGAGGCCACGGCCCGATGGTGTAGGTGTGTAGAGGTAGATCTGGGTT  
TGGTTTGGTTCAGGATACTCCCCCCCCCTTTAAGCCCTCTCTCCAGCGAAATTATAAATAACTTGTAACCTC  
GCTAGACCTGGTAAGACTGAGAATTATACCCCGGCCAGAAGCTTCTTACAAGTGGCGCCCGAGCAGGGA  
CCAAGAGGCGTTTAGGGGTGTGGCATGTTCGGCGGATTAAAGCCCGCAAGCATGCCCGAATAGGTATTTTC  
CAAAAAAATAAATAATATATATAGGGTATTTCTAGTCGGGTATACCCTAGAGGGAAGGTAACTAGCA  
GAGAGCAAGAAAATGAGAAGGTCATGTATGTGCGAAATATGAAAATAGGGTATTAAGTAGTCCGGTATA  
CCCCAGAGAACATTCCTATACCTTGTGTTAGGCATAGCCAGAAAATGAACACGTGCAGCTGGTGAGTGAC  
AAAAATGCTAGCAGCAAGCCGGCAAGTAAGATAAAGAGACGAAAACATAACGGTCGGTCGTGAGAGTAC  
AGCGCGCGCGCGCCAGCCGGGCGACGTCGAGACCACGCTCGCACACGGGTGCCACACGCGCGGCGCAG  
TCGACGTGCGCGTCGAAGGACCGTTAAGGCGTCGCGGCAGCGGTTGTACAGTGGGGCGAATCCAACCTCAC

GCGCGGTGAAAAGTTGAATTCGCGAGTACAGCTGTCGGGGCAGTGAAGTGGTCACCCTTCAAGTGAATGT  
GAACAAAGGGAACAATAAGAGCGGAACAAGTGCCAAATAAAAATAAGTGGATAATAATAAAATTTTCTT  
TTATAAATAAAATTAATTAAACAAAAATAAATAAAAATAAGTGGATAATAATAAAATTTTCTTTTATAAA  
TAAATTAATTAACAAAAATAAATAAAAATAAGTGAATAATAATAAAATTTTCTTTTATAAATAAAATT  
AATTAAACAAAAATAAATAAAAATGAGTGGATAATAATAAAATTAATAAAACCGAGGTTTCAACAATAAA  
GATAAAGGCAGCGACACATAAGGAACAGCCTAAAAGCGGAAAAGTGAGAAAAGAAAATTTTGAAATAC  
CTTTTGTGAGTTTTTTTTTTTTTAAAAAAGGGGGGTAAATACTTTTGTGGAATATTGTTTTGTATTTTTGTTT  
GGTGAAAGATATAAAGACAAGAAAATAATAATAAAATTTTNTTTTATAAANAAAAANNACTAAAAAGAA  
AACTAAAAGGAACCAAAGTGGCTGAGNAAGATCGGCGTAAAAAAAGTGAAAAGACACCAACACCAAGA  
AAAGGAGAGAGGAATAGTAAAGGGACCGACGGAACCCCTAGAACGGGAAGAGAGGGGAAACAGCGACGT  
CGACTAGCAAGGAAGTATACAATAAAGGATGGAGGCAGGTGAGTGCCAAAACCCGGGGGTAGGCGTCCG  
CTGGATCCACCAGCGACGCAAGGAGGAGTTGGTGGCCATCGCCCAGGAGTTTCGGGCTGGAAAAGGAAGG  
GCGCGTGGAGGAGCTGCGTAGGGCGGTGTCCACCTACGTGCAGGAGGGCGGCCATTCGNCTGGGATCTGG  
GCTCGGCTCGCCGAGCTGGAGTCTCAGTTCGCGAAAACGTTNGAGCCGCCATCCTGGGGCGTCCCACCCG  
ACGTGGGTGGACGGCCGCGGGCCAAAAGTCGGAGCCTGACCTCAGGAGCTCNCAGCTGTACGGGCGTCC  
GCGGCCGCCCACCCNNGGTNTGGCCGTCNCGGGCGTGAGAGCGGCTCCCGCTCCCGGGGGAAATGGAGA  
CCGCCGAGCAACCGCGGCCAACGCAGGGGTGGGGCGGTCCCCTGTTGAACCGGGTGGTGGTCCCTGCTAC  
ACTAGGCCGCACCATCCGTCGGAGGCGAGGCCACTTCCCAACGTCCCGGAGCAAGTTCGGAAGTGGGGCA  
TGAGGTACGATGGNCGCTCCGACCCCTCGGGTTCTTGAGGAGCCTAGAGGAGCGCGCCATCACCTATGG  
TATAGCCCTCGACCGTATGCCAGGGCGATGAGCGAGGTGTTCTGCGACAGGGCCGCTCGTTGGTTTCTG  
AGCAGTGGGCTAAGGGATGTGCCGTGGGCCGTGTTTCAAGGAGGGGTTTCTTGAGTTCCTGCCCCCNC  
GCTACTTCGAGAGGCTTGAGGACGAGATCCGGTCCCGGAGGCAGCGCGTGGGNGAGGAGTTCAAGGAGT  
ACCTGATAGAGCTGAGGGCTCTGATGCATCACGCCAGATACGAGCCGGCACAGGAGCTGCACCGGATCTA  
CGAGAACGCCGCTCCGGAATACAGGCTCTATGTGCGACGGCAAGACTTTTCTACCCTATCCCAGCTAACTC  
AACTGGCCGTAGAATACGAGACCGTCGTGAGGCAGAGGGCGGAGTACTCAGGCAGCCAACCTTGGGTC  
AGGGTGTCTCTAGTTCAAATAGTGCAGAGTGGGCGAGGACGGCGCAGTCCTCGGGACATCTCAATCCGTT  
CCGGTCTGCTCCCAGCGGATCCGGGACGACCGTTGTGGACAACAGGGTCTCCACCCACCCGCTGCAACT  
CACGCGGAGGTGGCCCATCAGATGATGAGCCAAGAGGCCGGGAACGGATATGATCCGCGACGGGCGTGT  
CGTAGGTGCGCACAGGAGGGGCATTTTGCCAGGGAATGTCCCAACGCCCTGTCTTATTTTGTGGGTATG  
TGGAAGCCGGGGCCGAAGTAGTCGGGAGTGTTGCCGCCGCGCGGAGACGGGAAACGGGGCAACGGCGTCG  
TCCGGACCAGGATCGGGTCGGCGCCAATACACGCGGAACGCAGCAATAGGACACCCGCTGAAGGTGGAC  
GGTGGCCGGATCGTCGCTACGGTAGAGATTGGCGGACGAACGATGCCCGCCACGATCGATACCGGAGCC  
ACTCGTAGCTTCATGAGTGAGGACTGCGTACGCAAATGGACGATCCGGGGGAAGAGCGGAGGAAATACAG  
GCACGTATCCGCCTGGCAGATGGGTCCACCCTAGAGGTAGAAAAGGCTTTGAGAGTAGACGCCAGCTTAG  
GGGGAAAAACGATCAGCATGACGATGCTCATCATGCCCTCAATGCTGGACCACGTAATCCTGGGTATGGA  
TTTTTTGGGGGCGATGAATACCACAATACGCTGCGGCGAGGCGGAACCTGGTCCTAGAAGCAGCGACGACA  
CCGGGCGTGAGGCCAGGAACGAGCGAGGAGTCGGAGGAAGGCCGCCCAAGGCATGAAAAGGGAGCACC  
TGCTCGGCTACAGAGGGAGCCGGAGGAAGGCCTCCCAAGGCATGGAAGGGAGCACCTGCTCGGCTACA  
GAGGGAGCCGGAGGAAGGCCTCCCAAGGCATGGAAGGGGAGCACCTGCTCGGCTACAGAGGGAGCCGG  
AGGAAGGCCTCCCAAGTCATGGNAAGGGAGCACCTGCTCGGCTACAGAGGGAGCCGGAGGAAGGCCTCC  
CAAGTCATGGAAGGGAGCACCTGCTCGGCTACAGAGGGAGCCGGAGGAAGGCCTCCCAAGTCATGANG  
GGGGAGCACCTGCTCGGCTACAGAGGGAGCCGGAGGAAGGCCTCCCAAGTCATGGGAAGGGAGCACCTG  
CTCGGCTACAGAGGGAGCCGGAGGAAGGCCTCCCAAGGCATGGAAGGGAGCACCTGCTCGGC

>9\_rnd-1\_family-97\_\_LTR\_\_Gypsy

AATTTTTTAGGGGAAGCTCCCTGCTGCCCTACATCAGTAGGAGAGTAGCAAGGATCCAGATGAGATTTCT  
CATCGACACGGGCGCTTCCAAGAATTATATCAGGCCACATAAAAATCTAAAAGGTGTGTGCCAGTAAAT  
TCTTCCTTCTCTACCCATTCTATACACGGCACCACGAAGATCACTCATAAGTGCCTTATATCTCTGTTCGGC  
AAAAGTCCACATTTTTTCTTACTCCCAGACCTGTCCACGTTTGATGGAATTGTGGGGCTCGACTTGCTCAC  
GCAAGCAGGAGTGTGCTTTTGTCTTTCTTCTGGCCAACCTCAAATGTGGCGCAGAACTGAACAAATCGAA  
TTCCACAGGTGCGCGGATGTTAACTTTACCAATGTTGACTGCGCCGACGCGCCCGATGCTGCAAAAGATG  
CATTCCTAAAGATGCTAAAAAGCAAACATAAGGCCTTCGCGGATCCGGAAGAAGCACTTCCNTATAACAC  
ATCAGTGGTGGCCACTATCAGGACCCTGATGAACAACCAAGTTTATGTCCGACTGTACCCCTATCCCATGG  
GAGCAGCGGAATTCGTTAATAAAGAGATTCAAAGCCTTCTGAAGAACGGTATCCTAAAAAATCTGTTTGC  
CCCTACAANAACCCCATTTGGGTGGTGGACAAGAAGGGGACGGACGAGTTTGGTAACAAGAATATGCGC

CTCGTAATGGATTTTCGCAAGCTTAACGAGAAAAACCATCGCAGACAGATACCCTATGCCTAACATTCCAA  
TGATTTTGGGGAATCTTGGCAAAGCTAAATACTTTTCGACATTGGACCTAAAATCCGGCTATCACCAGATC  
ACGCTAGCAGAGCGTGACCGTGAAAAAACAGCCTTTGCAGTTAACGGGGGAAGTACGAATTTTCGTGCGACT  
TCCCTTTGGGTTGAAGAACGCGGCCAGCATCTTCCAAAGAACTGTTGACGACGTACTGCGTGAGCAATTT  
GGCAAATCTTGCTATGTCTATGTTGACGATGTCATCGTCTTCTCAAAAGACGAAAATTCTCATGTCCAACA  
TGTAGAGTGGGTCTTAAAGAGCCTGTACGAGGCAAATATGAGAATCTCCAAGGAAAAATCGCGTTTTTTA  
AGAAAAGCGTAGGTTTTCTTGGTTTTCTGTTGTAACCAGTAATGGAGCTACAACGGACCCTGAAAAAGTCAA  
AGCGATTGAGGAGTTCCCGAACCAGAAAGAAATATATTCGAGATCAGATCATTTTTTAGGACTGGCCAGTTAC  
TATAGGTGTTTCATCAAAGACTTTGCCTCAATAGCAAAACCCATTTCTGATCTTCTAAAGGGGCGAGAATGG  
GTCAGTAAGTAAACATAGATCGCGAAACATCCCGGTAGAATTCTCTGAGCTTCAGCGTCACGCATTCCAA  
AAGCTACGCAACATTTTGTATCAGAAAACGTCATGCTCAGATACCCTGACTTTAAGAAGCCGTTTGATCT  
AACGACAGACGCTTCAGCTTACGGCATAGGGGCAGTGCTTTCTCAAGAGGGTCGCCCCATCTCAATGATT  
TCCAGAACATTGAAACCCCGGAGGTGAACTACGCCACCAACGAGCGGGAACCTTTTGCTATAGTTTGGGC  
CCTTAGCAAGCTACGTCACCTATATGGGGTAAAGACATTAACATTTTCACGGACCACCAACCGTTA  
ACTTTTGCCGTTTCTGAGTCAAACCCGAACGCCAAAATTAAGATGGAAGGCGCGCATTGAGGAAACGA  
ATGCGCGAATATTTTATAAGCCAGGCAAGGAGAATTTAGTTGCTGATGCGCTATCGCGACAACAGCTCAA  
CGCTCTTGACGAGCTGAATACTGATTCTGCGCAGCCACAGTCCACAGCGAGCTGTCCTCGACCTATACAA  
TTGAGTCAACCGAAAAGCCACTTAATTGTTTCCAAAATCAAATTGTCATTGAAGAGGCACGCGTCCCCAC  
CAAACGCAACTTCATTCTTTTCGGGGACAAGAGGCGTCGTGAAGTGAGCTTCGCTGATCGCACAGCCCTTC  
TAGATGAACTCCTTGACTTGATTAATCCAAATGCGGTTAATGCCCTCTATTGCAACCTGCACACACTAGCA  
CAGGTGCAGGATGGCTTAGTTTCGCATGTTTCCAGGCACAAAGTTCTGGCACTGCAAAAAACCGAGTTGCA  
GATGTCTTCAACGTTGACGAGCGGTTAGAAATCATCGCTGCCGAGCACAATCGAGCGCACAGAGCAGCTC  
AGGAAAACGTTAAACAAGTACTTCGGGACTATTATTTTCCCAATATGGCCAGTCTGGCCAAAGAAGTGGT  
TGCAAACCTGCAGGGTCTGCACTAAAGCCAAATACGATAGGCACCCGAAGAAACAAGAACTCGGGGAAAC  
GCCTATACCAAGTTATACTGGCGAAATGTTGCATATTGACATTTTCTCGACAGACAAGAAACAGTTCTTGA  
CCTGCGTAGACAAATTCTCAAAATTTGCAGTCGTCCAACCGATATTATCCAGAACGATAATCGATGTCACA  
AGCCCTCTACTGCAAATCGTTAACCTTTTCCCGCAACCAAGACAAGAGATATGGACTACCGCAAACCTTCG  
AGAACTTGTCAACGCAAGTAAGGAAGAACTTTTGTCCGTGGAGAAAATGTCAATGTGCAACATTTCTCC  
AGTCTGTGAGGGAAGTGGCGTCTGGCCGAGTTCCTGCTTCTTCGGGTGTCTGTCGTATTTTGCTTTCGTGCA  
AACTCTACAGTTAAGCACCCTTCGTTAGCTAATTTGGTCAATTTTAGGGAAATAGTACTCCGTCACGACCT  
GTTTTACAAGTCCCTTAGTAAGTNGTATTGGAACTAGCCAAAGCTGGAAGACAACATTTAAATGCATTA  
ACCACGTTTGGGTTAATGACGATGTTTGGTCAAGTAACCATCAGAGACAACACCGACTGCGTGCAGTAAC  
AGCAGAAGACAACAATCATACTTGCAAACCTAGAGCAAATATTGTTTGGGAGCTGTTTGTAAAGCTGCTGCC  
CATTCTATTTTCGTAGGCCCTTTGCCTTCTGCACGAATGCCCGCTGCCACCGTTTTGAGCGCAGCTCCATTT  
CGTTACAAGTCATTAGTTTTTCATTTGATCGCAACCGAGGCACAACTATTTTCGAGTTGGCAAACAATATTA  
ACAATAATTGCTAATAAGTGTAAAGTCGAAACTAAGAATATTGTTTCAATTTGATTGCAAAAAGGCTTGCAAC  
TACAAGTTAACAGAGCCCAAGTACACCAGCTCCAGATGCTGATATAGCACTGTGCCGAATGTTCTAACGA  
GTTAACAGGGGTCAGCAAAATGCAATTTAACACCAGTCACAGATGCTGACATAGCTCTGCGCCGGATGTT  
CTTGACGAGGGAAGCGCATGAGCCGCAAGCGGCCGTTGTGAAAAGCACACAATAGCTTAGGTAATGTTG  
ATCAATCTTTTGTAATTTAGTTTTAATCCGGCTTTTACTGAGGCACATCTCAGCGACTTTGCGCATAAATT  
TAGCGTATCGGCCTAGTGTTTTACAAATAATAAAAATAATCAAAATAAAGTCTTGTAACGAAAATCCGCGA  
GGACTTCTTATTTAAATTTTAATTTGCGCCAAACGTTTTTCGCTTTTTGTGCTATAATTATATTGTGTGCGGT  
GCAGTGTAAGAATAATCTACCTGTACAACACACTTCGCGTTGTGTAATAGCAATACCCAACCTACAG  
TGCAAGTAAAAAGCTGTGCCTGACCTATTCTATTTACAGCACAAGCCCAACAAAAAGGCATTTGATAGC  
GACTTGTCACCAAGCAAGCGGGTTTGGGCAGCGAAGTAAGCCAAACCCATAGACTTCAGCGAGGGATC  
ATAAGAAAGCATTACGTCTGCAGCGTGGGAAGCAGTAGTTTTTAGACGTAGAGCATACTGCCCTTGTAAG  
GATCAAAAAAATGTAAGTGGCCCATCATTTGGCACAACTTTTTTCAATATGATTGATTTATTTCAAATAA  
AATCCAAAGTCTGAAATATAAAAAAATTGCAGTAATTGTGCTACCAACTAATTTTGAGTAACACAATTTTGC  
ATCCATCAGCAATTTTCAATAAACTCTCCTAATTCAGCATTCAATTAATTTATTGTTGTTGATTTGCCCTTG  
AAATTGTGTTGTTATTATTGTTGACAGTATAGTGCATGAACAGCTCGTTTCTCAGGTACAGAGACAGCTCT  
GCGAGGGGATTTGAGTAAAACGACTTCAACGCCTTAAATAGGGAAGCCGTCGCCGAAGAAATCGGTGAC  
AACAGGTGTAAATGGAAATGGAGCCTTAGCAGCCTAGGGCTTTGGTGCAGGCCGNAGTGGCCTCCGCCT  
TTGAAGCCGAAAGCGCAGTATTGAAGCAAAGAGATGTAGAACTGAGGGNTTCTTAAACGCTTGATACA  
AGAATTGGGAGGCAGAATATCTGCCAGTAGTATAGAAACACAGTAGTATAGAAACCACCGTCCAGGCATT



TGAGCCGGTGGAAATCAGAAAGGACGTCGAATGTAATGAACCGTTGGACGCCGTTAAATGCTTACCA  
>9\_rnd-5\_family-2111\_Unknown  
GTCCAGGCGCATGGTGGCTTATGAAGCCAAGCTAGCACAATTGTGGAATCTGTCCAATAGAACCAGTCGC  
CGCCAGCGGAAGGTAGCTGGGGACTGAGTGCAGCGGATAACTCGGACAGAAGTGCTGCTCCGCACAGCT  
CTAGTCGTGGCAAGGATACCGTCTTGACCGGAGCGACCCTCGTTTTCGCTGTTAGGAGATGTACTGAGATG  
CGATCTTGTATCTCAGTGCGCACGTAAATGGCGGGCCCCATATGCACGCTGCGAAGCGTCACAAAACCCGT  
GGTATTGAATAGTCCCCTGTGGGCGGAATTCGACCCATCTAGGGATGCGAATCGCACTGAGGCCCGGATA  
CTCTTGAGAAATAAATTCCACTTACTGAGAAGACTCTCAGGTAGCGGATCGTCCCAGCCCAGTTCTTGGA  
GCCAGATCTCCTGCATGAATATTTTTGCCTGAATAATGACTGGACCCAGCCAACCTGCTGGATCGAACAGT  
TTGGCAATCTGTGAAAGGACTTCACGTTTGGAGACGGACTGTTTGGTTGTTAGCTCGGATGGAGCGAAAA  
AGAATCATCGGTGTCAGCTTTCCATCTGATCCCGAGAGTCTTTGCCGAACAGGCTTCTTCGATCTCTAAG  
AAGTCGGCGCGAAGCAAGTGGTCCTTGGGAATCGCTTTTAGCAAGTCCTTTTCATTGGATGTCCATTTTCG  
CAAGGGGAACCCGGCAGATTCAAGGGCTTTGCGGAGTTCTGCAATTGCTTGATCTGCCGTTGATTTGGAAT  
GGGCTCCCGCTAGTACATCGTCGACATACATATTGTTTGCAGATAATGTGACTTGCTAAGGGATAGAGCGA  
ACGAACGTCATCAGATAACTGATGTAGTACCCGGATTGCCAAAAAGGGGCACAGTTAACTCCAAACGTGA  
CTGTGCTGAGTTCGAAGTCACGAAGCTCGTTGTCCTTTGTTTCGGAACAGAATTCTCTGATAGGGCGTGTGT  
TTGGGATGCACAAGTATCTGCCGATACATTTTCGTGATATCGGCATTGAAGACATATCGGAAGAAGCGCC  
ATCTTAGAATTTGAATGGTTAAGTCGGATTGCAGAACGGGCCCTGCATGTAGCACATCGTTCAGACCTTTA  
CCATTCGATGACGGGTGGGAGGCGTTAAATACTACGCGGAGCTTGGTCGTGGTGCTGTCAGGCTTGTGAA  
CAGCATGGTGTGGTAGATAAAAGTTATCCGAACCAATTGCTTGGAGGGACTTGTGCGATGTGACCTAAGTC  
CAGATATTCCTGGATCACCGCATCGTACTGCTCCTTAAGGGGGGCATTTTTTGCCAGACGATTCTCATTTC  
GTAGAAATTGAGCTAGTGCGATGGACCTTGAATGGCCTAACTGGATGTGATCGGAATTCTTGAATGGTAG  
TGTGACCAAGTATCTGCCGTTTTTATCCCTTTTAGTGTTTTTTTGAAATTGCGCTCACAAAACAGGTCGGA  
TTCCTTTTCCAGCTTTACTGGAATATCCTCCACCTCCCAAAATTTTGTGAGCAGTTTATCCAAGCTCGCATT  
TGGATTACGCGAGACTTGAGTCGAAAAGGATGCGACCGATTGCGCACTGGTCTTAGAAACGGGGCCTGTA  
AGGATCCAGCCGAAAATCGTTTCTTGACCAAGGAGAGTGCCACATATGTTGGGATAGGAGCCACCTAACA  
ATATGGATGGGAGGATATCGGCGCCGAGAAGCACGTCTATCTGTGAGCTCCTATAGAAAGAGGGATCGGC  
CAAGTGTAATTTTGGAAGTTCTTCCAAAGCGGTTTGGGGATGGTGTAGGAGGGCAAATTGCCTGCTAGCTT  
TGGAAGAACATAAGCCGAGGTTTCAATATGAACCTTGGGCTTTATCGGAGAGCCAATATTAATAATGGCAA  
AGTTTTTTTGAGGTTGAGCCGAAATAGCTTGATTTAAACCGGAGACCTGTGCGTCGACGGGTTGATAAGG  
AAGTTTAACCTTTGAACAATCGCTCTGAAATAAAGGTCGCTTCAGACCCAGAGTCGATTAATGCCCGAG  
CTGTATACTTTGTGCCCAAATGACACACTTGGATGACAGCCGTGCCGAGGAGAACACCATGTGAGTTTGC  
GGAAAAGTAGTTTTGAACGGTAGCTTGGGTTGAAGTAGAAGTGGACTGTATAGACGAAGGAGGGTTCAA  
AACTATTGGTGTGTGGAAGCTGAGGGCACCTGGGGTCTGTGCGCGGTGGAGCAGCGTGTGTGACGTCCC  
TTGCACGTGAAACAACCTATGTGCGCTGGTGCAGTCTTTCAACTGGTGCTGTCTGGCGAAGCAGTTTAAGCA  
CAACTTTTGTGTGCTTAATGACGGAACTCTCTCGGGTACGGACATTTGTAGAAAACGTGGGCATAGACGC  
ACGGGATGGTTTTCTTCTGACACAATTTGCAGTGTTGTGACTTTGTAGTCACTGTTGCTTCGAAGGTTCTC  
AGGTGGTTGGACTCTTTTCTTGTGGGTTTGGACTGGGGTGGCGTATGTGCGGTAGGTCGTACATCCTCTAT  
CGCCTCCAAGGTGCGATATCGGTGATCAGAAATGAATTCATCTCGGACCATTGAGGTATCTCTGCCTTAT  
CGTGGAGCGATTGTTCCCATACGACAGCGTGAGCTTAGGCAATTTAGAGGAGCACAAGAAAAATAAGC  
AGACAATCCCAATTTTCGGTGCTCACCTGGACAAGTCGAGAGCCGTTAAACATCCCTGGATTGTGCCCTG  
AAGCTCTTTAAGGGCGGCTCCAGACTCTTGTGTTGCTGAGGGGAGATTGAAAAGAATTTTCAATTGACTAT  
TGACTAATAGTCGCTTATTCTCAAATCTCTCCGTCAGGCTCGCCACGCTGACTGAAAGCCGTCATTCGTG  
AGCGGGGACTTGGAGACAATTGCCCTAGCTTCGCCGCTGGTTTTTGGAATTTAGATGGAACAATTTTCCAC  
CGGCGTCAATCTTGATTGTTAATAAACCCTGTAAACAAGTCTCGGAAAGTAGGCCAGCGTAGGTAA  
TCCCCACTGAAAACCTCAGTGTCGCATGGCGGGAGACTGCAACCCCTGGACATGGAGAAGTTGGAGGGGG  
TTTGCTCAGCTTGTCTATTTAAAGCCGTGGCTCTTTCTATTTTTTCACTTAGTTGAGCCGCACATCGCTCGT  
AAACGGAGTACGAGTAATCATATTTAGCTTGCATAGCCACCAGGTCACTGCTGCTGCAAGCGCCTTGGTT  
GAGAGCTTTGGAACATAACTCGTACTCGCGTTCTACCTTTTCCCATAAAGTCTTAATCTGATCTCGTCGGA  
CTTGGAGAGTGAACAGTGACACGTCCTGTCGCTGCGTCATTGATCTTCACTTCAAACCTGGCCTAGTCGG  
TCAGTTATAGAAACGAAGTCGTTCAAGTGCATTTTCGCTTGAATCTGCAATTTTTTGCGTAGTCGAACGGGT  
AATTTTTGGGGTAATATCTCTTGTGGAATCGGACTCACAGTCTTGCAGGACGGTTGTGCGCTGGTACCCTC  
GACCTTGAGTTTCCCGAAAACCGCTCTAGGTGAGGTTAAAGGTCGCTTTGACTCCTTANCGGACGGTGCTG  
TGAGTCGTTTNTGGCTGTTTTGATCACCACCGATTGGCATACTAGGCTCTTCACAGAGCCAAAAATTGTAA

TAACCGGGTGAGATGTGATCAAATACAAATAANTTGAATCAGCCGAGCGAAAACGGAATGAGAAATGGC  
ACAGGAACGATGGAATCGAGATATCAGAATAAAATGGAATGACCGAAATGGTGTTCCTATTGAGTCCA  
ACGAAATCGGAAAATTTTGTTAAATTAATTATTTTACTAATAATTTACTAAATTGATGCTTATTTAGCTTCC  
TTTACTTGAGAAACAATCTAATTATTTCTTTATTGAAACACCAGAGAAAAGATTAATTCTCTTTTGACAAG  
GCGGCCGTGTAGTGGAACGGATCGCGCAAAAAAATTGATGCTTATTGCTTATTACTTGTTGAGCTCAA  
GAAGATTCTAAACGCAGCTCAATGGAAGGTTTTTTTGTGCATAGAATTATTTGTATAAATTGTTATTTTTTAAG  
AAAAATCGCACGGATATTCGATTTATTACGCAACTTGGAACGTCTTAACCTTATAATTATGATTTATAAAT  
TTTTATAAGAATAAAGAAAAGTAATGCATATGTTTGTATTTTATTAAGTAAACGCAGCTCAATGGCAAAGT  
GGAAACACACAAAAATATAAAGTTTCTCAGAATCAGTTTATCGAAAACCGATCTTGATACTTTACAACCC  
TGATGTTTGTGTACCTTTTGCCTCGCCAATTAATTGGTAAAAATAAATATATAAATTGATCTTGAAGCTG  
CTGTGGAGGAAAAATAGCAAACGATACACATATATATATGATGTGCGTGTGTGTGTATACATGCAGGTGA  
ATTTGCACAGTGTGGTTTTAATTAATACTAAATACCAATCAGAATTGTGTGTCTTTTTTTTATATTTAGGTATG  
TGATTATTTGGTGAAGGTTAGAATGGAGAAGCGCATACGCTT

>9\_rnd-4\_family-2491\_\_LTR\_\_Gypsy  
ATGAGGATGCACGTGAGATGGAAACAGCCAGCTTAAAGATATCCAAAACAATCATGGATGAACCGGATT  
GGTTATTTGCTATACAACTTCAAGATGAAAAGATCCAAAACCTTGTAACCGATATGAAATCCGCCAAAGT  
AACCGAAAATGACGAGTATGTCATTGAACTAGATCGGCTCTATCGCAAATACAACAACAAATTCTTGTGG  
GTTGTGCCTAAGCAGCTACGGTATCAGATCCTTTATGAATGTCATGATAAATCAGGTCATATGAGCGTTGA  
GAAAACAATGAGCCGTATNACAAATTTATTTTGGTTTCCACGCATGCGAAATTATGTCAAAGGCTATATA  
AAGTCCTGTGTGGGCTGCGCATTTTTTAAGCAACGAGGTGGTCGCAAAGAGGGACAATATCATTATGACG  
ACATCAAGCCAATACCATTTTCAACGGTTCATATCGACCACCTGGGACCATTTCCAAAGAGTTGAAACGC  
AACGAGCNCATACTTGTTTGTGTCGATGCATTTACCAAATTTACGATTATGCGCGCCGTTAAAAGCACAGC  
AACCAAGCACGTCATCGATATCCTCAAAGAAGTAACCAGCTATCTGGGGATGCCACAAAGGATTGTCTCC  
GATCGAGGTACAGCTTTCACCTCAAAGATTTTGGAAAGTTCTGTACAGACAATAATATTAAACACGTCCT  
TAATGCTGTTCGAACACCCAGAGCCAACGGACATGCAGAACGCACTAACAGAATCATCTTGTCAATGTTG  
CTGCCTATGTCCGAAAATGAGAAGCGTTGGGATGAGAAGATGCACTCCATCCAGTGGAGTATTAACACGA  
TGGTTAACAAATCTACTAACTGTTCTCCGTTCCAGCTATTATACGGTTACGAGCCTCGGGACATACTACAA  
AACACTTTAGTGAAATTGCTCCAAAACCAGAATCCTACTATGCTGACAGATACCGAATTACAACAATAA  
GAAGCGACGCTGCCCATCGGGTCAATGATCATCGAGCTGAAGCCAAAAGACGATATGACGCAAGACACG  
CCAAGCCGACAGTGTATAAACCTGGAGATATTGTTTTGGTTCGAAAATGAACCATGCAGCACGGGCACGTC  
ACGCAAATTAGAGCCACATTTCAAAGGACCCTTTATAATCAGCAAAGTTTTTGCCAAAGGACCGATATCTT  
GTTGAGGATATCCCGAATGCTGAGCGAACACAAAACATTATAAATCGGTGTATTCTTCAGACAAAATCAA  
ACCATGNCAGTTACCGCCAGAGGAGCCCGACGAGGATGAAGACTCCGTTGATGACCAAGTAAACTCATCT  
CGCGAGGACGCTTCGAATGTCAGGAAAGCCGAATGTAAGCGTCTGGCAATCTCAACCCATTGCCATTAC  
AGCGAATCGATAATTAGGCGAAGAAGTATCGAGTTAAGCATCACNAGAGAAAAAGGAGGACGGACGCTT  
ATTAAGAATCTAAGACATAAGCAAATCTTTGTGAAGTTAACGCATTAAACTATTCTATCTTTACTTATGTT  
TGTATAAGCGTATCTCACTCAGTCGACCTGGACCGATTCTTACAGTTCAGAAGTGGATAGATAGATCTATG  
TATGTACATAGATATGCCGTGTTTCGCCTACACGCATATACAAACACATGCAGAGAAGAAACGCATAGAAG  
TCTGGATGAGAAGTTTGCAGTGGGATATGTTCCCAAAGGTCTAAGTGACAAAGATTACTGCAAGCTGGGA  
TAAGTTCCCTCGATCTTAGCGTCAGACTGTTTCATAAGTTGGAATACGTTTTCCNGCAGCGTCGGTGTGTAT  
AAGTACAGATAGAAGCCCTGTATGTACGCATGTGTTGGTGAATTTACAAAGGAATTTACCATCGAATTTT  
ACAACCTTGAGCTAACATTGCGATTGCTGTTGCGGAGAAGCAATTCACAGAAGAGTTGGCATCATTTTGT  
CGAGCACTTCGTAGACAAAAATTGAAAAGAGATAATAACAAATTTGGAAATATGCAAAGGATAGGAGAT  
TTAAAAGTTGATCAGCTAAAATTCCTGTTGCGAGAGCGAGAATTGTGCAAGTGGCACACGGGATGAAT  
TAATTCGTGATTACAGGAGCATGAAGGCTCAGATGAAGTTGAAATGCCACATGCCCCCTCGGCAAAGCCA  
TGGGAGAAGAGGGAGGATCACTTTATCAGCTACAGAATGAAATAAAAAGGTTAAGCGAAATTATGAGTC  
NGTTTATAAGCATGCAATGCGCTAGTGCTAGTGAGACAAATGTCGAATTCGCAACCGGCTATAAACAACTT  
AGTGCAAGATACAGAAAGCGAGGNGGATGATGAGTATCAACAAAGCACAGCCACACGTCAGCTCAAGCTTCGGT  
CAAGGAAATTGCTAACACGTTGCCTGAGTTTGACCCGACAGATGAGAATGCCATTTAGTCAATCAGTTC  
ATTGATCGTGTCAACAAAGTGGTTGAGGCATATCAATGGGACGAAAAGTTTTTAATGCTCGCAATCTACA  
CTCGACTCAAAGGTCCAGCCAGAATGTGGTTTGACTCTTCGCCAAGACTTCATACGACATGGCACGACTTT  
GCAGACGCACTTCGCGACGAATTTGGTGTTACACCAGATGAAGCAGAAATCCACTACGCCATGGCAAAT  
CGATAAGACGTCCAAAAGAGACAATAAAGGAATATTGTTTCCGTATGTCCGCCCTGGGAGTTTCGATTTAA  
TCTTAGCGAGGCAGCTGTAATACGATACACACGATCAGGTCTTCAGCACCGTGAAGTGCAGCAGAGTATC

GCAGCAATGCACTTCTCAACAATGAAGCAGATGCGAGAAACGGCGGAATCCTATTTTTGCCAATCGAGGTA  
GACAACATGAAGTCAGAGACAGCACAGCTCTAAAGTATAGCAACGTTGAACAAAGGCCTGAGAAAGATT  
CAAAGACAATGAAACCAAAGGCAACACTCAAATGTTATAATTGCAACGAGTTTGGTCACTTTGCAAATCA  
GTGTCCAAAAGAACCGAAATGTCAGCGCTGTACCAATTGCAACAAATTCCACCCGAGTAACGTCAAGTGC  
AAGTCAGCTGAAGTAAATGTAAATCGTCTTGGTGCCATAAATAGAGACAAATGGTTCTCTAAACAGATAA  
TCGTCCAAAACAACCGTACGTGCTTTTTATAGATACTGGTAGCCAAGTGAGTATGGTTTCGCAAGTCGGTT  
GCTCAGTATATTAATGGGGATCGTCAAAAATGCTCAATTCGTATAAGAGGCATTTGCGGTGGTACACGAT  
TTCTAACTGAATCTAAGATTTTGGATATATGGATCGACGGAAGGATCGTTAAGGCCCAAGTTTACATCGCC  
GATGATGAGATCTTACAGGAAGACTTCTTGCTGGGACAGGATGTTATAATCGATGCGCACCTCACGTTTAC  
CTTCACAAATGGA AAAACGGCTTTTGAGAGCAAAAGAGCAGTTCAGCATACAGAAACAAGTGATTCCAA  
GTTTGCTAAGCTTCTTTCTAATTTTAAGCTCGAACTGATAAAGTCCGAATGCACACATTATTGGACAAGT  
ATACTGATGTGTTTTCAAGTGGTCTAGAAGGAATTGGCCGCACAAACGTCATACAANCAAGCCTTGAGGG  
AGGACATATTGTTTCTCAAGCACCATACCGCATACCTGAACCGAAGCGAGATATTGTCACCGCCATGATT  
GACGAACTCTTGCAAAAAGATATAATCGCTATGTCAACATCCGAGTATGTCAGTCCTATTGTACTAATCAA  
GAAGCAGAATGGAGGTGATAGACTATGTGTTGACTACCGTCGTCTCAATAAAGCTTCATTAAGAAGGAAA  
ACTTTTCAGTTCCCAACAACATCGAAGAGCGTTTACAAGAAGCCAAACGATTTAAATATTTCTCATCGTTG  
GATTTTAAATAGCGGATATTATCAGATTGAAATAGCCCCTGATAGTCGGACGTATACAGCATTTCATTACAA  
CAGATGGACTTTTTGAATTCAAACGACGCCATTTGGATTGAAGAACGCGCCAACCTGTGTTTAACCGACTT  
ATGGCGAAAATTCGTAAAGCGCGTTCGTAAAGGTGATATGCTGCACTATATNGATGATATTCTTATTGGA  
AGCAAACCTCATTGGACGGAGTGCATGAAAAGCTTGCGCGTGTCTACAGGTTTTGAAAGAATGCGGCTTG  
ACATTGAATATCGACAAATGTGAGTTATATAAGCAGACAACAACATTTTTAGGACATCAGATACATCCAA  
AAGGTATCAGTCCAGGTGAAATAAAGACCAATGCCATCTCTTTGTTTGCTGAGCCAAGCTAACGTGAATG  
AAGTAAGATAGTTTTTNGTCTCAGTGGATATTTTCGAAAATTTGTAGCAGGTTATGCTATAATATCTGAG  
CCATTACGTATGCTACTACGTAAAAATCAGCAGCTTATATGGAATCAACAACAGAAGGATGCATTCAACG  
AATTGAAGCAATGCCTCGTATCTAAGCCAGTGCTTACAAGTT

>160\_rnd-1\_family-132\_\_LTR\_\_Gypsy

GATTCAAAGCCTTCTGAAGAACGGTATCATCAAAAAATCTGTCTCCCCCTACAACAACCCCATTTGGGTGG  
TGGACAAGAAGGGGACGGACGAGTTTGGTAACAAGAATATGCGCCTAGTAATGGATTTTCGCAAACCTTAA  
CGAGAAAACCATCGCAGACAGATACCCTATGCCTAACATTCCAATGATTTTGGGGAATCTTGGCAAAGCT  
AAATACTTTTCGACATTGGACCTAAAATCCGGCTATCACCAGATCACGCTAGCAGAGCGTGACCGTGAAA  
AAAACAGCCTTTGCAGTTAACGGGGGGAAGTACGAATTTTGTGCACTTCCCTTTGGGTGGAAGAATGCGG  
CCAGCATCTTCCAAAGAACTGTTGACGACGTACTGCGTGAGCAAATTGGCAAATCTTGCTATGTCTACGTT  
GACGATGTCATCGTCTTCTCAAAAGACGAAAGTTCTCATGTCCAACATGTAGAGTGGGTCTTAAAGAGCC  
TGTACGAGGCCAAATATGAGAATCTCCAAGGAAAAATCGCGTTTTTTTTAAGAAAAGCGTAGGTTTTCTTG  
TTTCGTGGTAACCAGTAATGGAGCTACAACGGACCCCGAAAAAGTCAAAGCGATTTCAGGAGTTCCAGAA  
CCAAAGAATATATTCGAGATCAGATCATTTTTAGGACTGGCTAGTTACTATAGGTGTTTCATCAAAGACTT  
TGCCTCAATAGCAAAAACCCATTTCTGATCTTCTAAAGGGCGAGAATGGGTCAGTAAGTAAACATAGATCG  
CGAAACATCCCGGTAGAATTCTCTGAGATTTCAGCGTCACGCATTCCAAAAGCTACGCAACATTTTGTCTG  
AGAAAACGTCATGCTCAGATACCCTGACTTTAAGAAGCCGTTTGATCTAACGACAGACGCTTCAGCTTAC  
GGCATAGGGGCAGTGCTCTCCCAAGAGGGTCGCCCCATCTCAATGATTTCCAGAACATTGAAACCCCGG  
AGGTGAACTACGCCACCAACGAGCGGGAACTTTTGGCTATAGTTTGGGCCCTTAGCAAGCTACGTCATA  
CCTATATGGGGTAAAAGACATTAAACATTTTCACGGACCACCAACCGTTAACTTTTGCCGTTTCTGAGTCAA  
ACCCGAACGCCAAAATTAAAAGATGGAAGGCGCGCATTGAGGAAACGAATGCGCGAATATTTTATAAGC  
CAGGCAAGGAGAATTTAGTTGCTGATGCGCTATCGCGACAACAGCTCAACACTCTTGACGAGCTGAATAC  
TGATTCTGCGCAGCCACAGTCCACAGCGAGCTGTCCTTGACCTATACAATTGAGTCGACCGAAAAGCCA  
CTTAATTGTTTCCAAAATCAAATTGTCATTGAAGAGGCACGCGTCCCCACCAAACGCAACTTCATTCTTTT  
CGGGGACAAGAGGCGTCATGAAGTGGGCTTCACTGATCGCACAGCCCTTTTAGATGAACTGCTTGACTTG  
ATTAATCCAAATGCGGTCAATGCCCTCTATTGCAACCTGCACACACTAGCACAGGTGAAGGATGGCTTAG  
TTCGCATGTTTCCAGGCACAAAGTTCTGGCACTGCAAAAACCGAGTTGCAGATGTCTTCAACGTTGATGAG  
AGGAGAGAAATTCTCGTTGCCGAACATAATAGAGCGCACAGAGCAGCTCAAGAAAATGTTAAGCAAGTG  
TTATCAGAATACTATTTCCCTAAAATGGCGAAGTTAGCTAAAGAAATTGCGGAAAGTTGTAGAATCTGCT  
CAGCAGCCAAATACGATAGGCACCCGAAAAGACAGGAGCTGGGAGAAACTCCGATCCCTGAGACTCCTG  
GGGAATTGCTACACATTGATATTTTTTCCACGGACAACAAATTTTTTTTGACCTGTGTTGATAAGTTCTCTA  
AATTTGCAGTCGTACAACCAATTCAGTCGCGCACTATCGGGGATTTAAAAGCTCCACTACTGCAGCTCACG

AATTTCTTTCCACGAGCCAGAACAATTTATTGCGACAACGAGCCTTCGATGAATTCTCAAACGATAAAGA  
CCCTGTTGTTAAACAACCTATGGAATCCATATTGTTAATGCGCCGCCGCTGCATAGCACCTCCAATGGCCAA  
GTCGAGCGCTTCCATAGCACTCTAGCCGAGCTGGCACGTTGTCTCAAGCTGGAGAGAAACATCAGTGACT  
CAGTCGAAGTCATAATGCTAGCCACGATTGAGTATAACAAGACAATACATTCGGTCATCAACAAGAGACC  
TGTTGATGCCCTCCATGTGCCCTCAGGCGAACCCGAAAGGGAAATATCAGCAAAGTTAAGAAGTGCGCAA  
GATGCGCTCCGGGCTAGGCTGAACGACCAGCGACAGAATAGAGTCTTTGAAGTAGGCGAAAAAGTNCTA  
GTAAAAAGAAACCGCAGGCTTGGAATAAACTCACGCGCTTATGTGAAGAACGGATCGTAGAGGCAGAC  
CTTGGTACGACCGTTCTCATTGGAGGGAGGGTGGTCCACAAGGACAACCTTAAGTAGGGCGAGAGCTGAA  
ATAAAACATCGATTATATGCATCTTGAATTTAACTATAAGTTTCAACATTTGTGCCACTAGGCTTCACCTTC  
AAGTTTTAATATTTACGCCACTTGGCATTTCCTTTAGGAAGACACGTTGTAATAGTTTGGTCCGTTTTGTCT  
GTCTTCCGCAGGTTCCGGGTTTTCTGCTATTTCTATTTTTTGCAAATGCGGCAGCGCGTGTGACTAATTACTCA  
CACGCCAAGTATATTCCCATTTGTTGAGGGCCAAGTTCTGGTCTGGGAGGAATTCAATTTTCGTCAGGCACAC  
AGCAAACATCTCTGAGTACGAGAAAATGGTAAACGAAACAATGGAGCTATGTGAAATGTTTCCGCAGTCA  
CACATGAGAAAGCTTCTAAGCGTAGATGCGTCCCACCTCAGAGATCTGTTAGAAGCTCTTGGCGTGCACC  
ACAGGGTGGCAAGAAGTTTAGATTTCTTGGGCACAGCCCTCAAAGTAGTTGCGGGAACACCTGACGCCAG  
TGACTTCGAGAAGATCAAATTCAGTACGTTACAGTTGGTGAACCTCTAACAACCGACAGGTAGCTATCAAC  
ACAAAAGTTCAGGAACAAATCAATCAACTCACTACAAGTGTCAACACATTACTAAAAGCTGCAAAAAAG  
AATCAGATAGATTCCGGGCATTTATACGAAACTCTTTTAGCTCGGAATAGAATGTTGCTGATGGAAATGC  
AGAATTTGGTGCTCGCTGTTACCTTGCAAAAATTAATATCATAAGCCCAAATATATTAGATCACGCAGAT  
TTGANATCTGTTTGGGTGCGATGAACCCACAGGTAATAGCTGACCTTATGTCCGTTGCGTCCGTGAA  
AGTATTACAATCTGTTAATGCCCTTCACTTTATCATTAAGTTCCCGAAAATCAAATGGCTTGCAGAAAGG  
TGATGCTGTATCCAGTTGCACATGAGAATGCTGTGCTACAAATTGACGACAACATTATAGCTGAGTGCGG  
AGATCAAGTGCTTGCCCTTAAGAATTGCACTTCCACGCCGGGAGGAACCTTTTGTCAACTTTCACCGACCA  
GCTCTTGTGCCAGAGAGCTGCATGCTGGTGGCTTGGCAAACTGCCAAATGCAGCCGAGTCACTTAGACCC  
GATCACATGGGTGCGATGACGGAATTCTGATCATCAATAACCGGCCTGCTAAAGTTTGCCTTGACAACGGT  
ACTGAGACTTGGGTTACGGAACGAATCTAATCACGTTCAATAATTGGGCTCTGATCAACGAACTAAGT  
ACTTGAATCGCAACAACGTCCAGAGTAAGTTCCCCGGCATCGCGGCATCTCCCCTTCTGAACGTCACCGGC  
CACCAAGACGTGCTGAGTCTCCCTACCTTCATCGCCTGAATGAACGTAACCTGGAGATCATCAAGGAAG  
TCAAGGACGAAATTGGAAGCGTCGACAGCGTGGTAATAGCCTTCTTGTGGGTGCTGTGTGTTGCACCAT  
AATTTGCGTCGGAGTCACCTACCGTCGGTTCACCAAAAACATGGCATCGGCCAAGGAGATTAAGAAGGTG  
ATCGCCGAGATAGGAGCGGCCGAGGGCGGCCTTAACCTAAAAGGGGAGCAGTTAACAGAGGCCAACGAC  
ACCAGCTCCAGATGCTGATATAGCACTGAGCCGGATGTTCTTACGAGCTAACAGGGGTGAGCAAAATGCA  
ACATAACACCAGCCGCAGATGCTGACATAGCTCTGGGCCGGATGTTCTTGCACGACGGCAGCGCACGAGG  
CGCAAGCTAAGCATTCTAGCGGCCGTTGTGAAAGCACACAATAGCTTAGGTATTTTTGATCAATCTTTTGT  
AAATTTAGTTTTTAATTGACTTTTACTGCGGCACATCGGCCCAGCGACTTCGCGTATAATTTAACTCACTC  
ACTACGGCGTGTGCGCCTAGTGTTTTATAAATCATTATTAATAAAGTTCTATCAAAATAATCCGCGAGG  
ACTTATTATTTAAATCCTAATTTTGCACA

>9\_rnd-1\_family-409\_\_LTR\_\_Copia

TAAATAGTGACAATAAGCTGTAAAGCTTCTTTATAATCTGGCAACATTGTATCAGCATAGTACTCATTCT  
GTAATTGAGTACTTGTTCAGATTTTGTACTCATGCTTGAAGTTTCCATTAAACATTTAACCGAACCCTAC  
GTGTGTTTTCTTTATGTGCATCTTAGGCACACTAGAAATTTCCCAACATTGGTTATGGGCCCAGGTCTCGTT  
GTTTTCGGTTAAATAAGTACACAAAGTGTCTATGGTTTTGAAAGCTTCCTTTTGTAAATTTTTAAAAAAGT  
TTATTTTCGTGCGAAGAATAACGTGGTGAAATTGTCAAAATGAACATGTCGCATCAAATAGAAAACTTGG  
TGAGGACAATTATGACGTATGGCATATGGCCATGAAAAGTGTCTTGGTGGTGGCGGACCTATGGAATGTT  
GTGTGTGGAATAATATGTTAAGCCAGAAGGAAATGGTGAGGATATCGAAAAATGGGTTAGTGTCGACCAA  
AAAGCGATGGCTTACATAATTTTAAATCTGAAGCCAACACAGTTGATGCATATCAAGTCATGCCCAACAT  
CTGCAGCTGTATGGAAAACTAAAGGAAATTCATGTCTCAGTTGGACCGATTAGGAAGGTCCAATTATAT  
CAAAAATTAATACGTTTCAATATGCAGCAGGGTGACGATGTAGTCGCATATGTCAATTCATTTGTTGAGAC  
AATTGAAAAGTTGGCAGAATTAGACATCAAACCTCAATGACGAGTTGCAGGTCATCATGTTTTTGAGCAGT  
CTACCAGACACATGGGAAAAATTTGTAATAGCGATTGAGACACGCGATGAGCTGCCCAAATTCGAAGTCG  
TCAAGGTTAAAATGTTAGAAGAGGCCACGCGAAAGCAAGAAAGAGCTAGCAGAGACGGCATAGGGACAC  
CAGAAGCAGTGTATACACACAAACATAATGGACCGCGGGACAACAACAGTGTGAAAGCAAAGGCAGAA  
AGAATAGCAGTAAGCAGCCATTCCGAGGCAAATGTTTTAATTGCGAAAAGAAGGGCATCGAGCGAGCGA  
TTGCCGAAATAAAAAGAAGGATGATAAAAAGAGCCAAAAGGACGAAAAGTCTCTATGCTTAATGCACAC

GTGTGTCAAGGAGAAGCAAAAGAGTTTTGGGGGTGCGTTGACAGTGGTGCAACATCGCACATGTGCTGCGA  
CCGCAGCATGTTCTTACGTATGCTGATAAAAAGACGTCGATAATGTTGGCCGCAAATAAGTTTATCGATT  
CACCCGGCAGTGGCAGTGTTGAGTTGCACTGCAATAGAATAAAATTAAAGCTGCAAAATGTTTTATATGT  
CCCTGACTTAAGCATGAATTTTTATCAGTAAGTGCTGCAGCAAAGTTTGAGAATTCTACCATATTTGAAGG  
GAAAATTGCGCTGATAAAAGACAAAGAAGGCAACGAGATAATAAGGGCAAGACACGAAAAATGGTTTGTA  
TGTTTACAAACATAGTCTTGATCAGGTTTCATATGCTAAATAGTTCTGATTCATCTTCCATAAAATGGCACA  
ATAGATTTGGCCACCTGAATTTTAAGGATTTGAAATTGCTTAATGATAAGCAACTGGTGCGTGGTATGAAA  
GTTGAAAATGTACAATTAGAAATAAATTGCGATACATGTAATAAAGCAAAAATTTGTGCATTGCCATTCC  
CACAGAAAGCGAATCGTGTCTCAAAGCAAGTACTGGACTTAGTACATACAGACGTATGTGGTCCGATGAA  
TGTTAAGTCGCTTGCAAGGCAATCGATATTTTCGTAACCTTTTATTGATGACTACTCACGCAAGATATTTGTTTA  
CCTTATGCACTCAAAAGCCAAGTTTTTGAAAAGTTTAAAATGTTTAAAACCTTTGTAGAATGCCAAACAGG  
AAATAAAATAAAGGCTGTGCGCAGCGACAATGGAACAGAGTATGTGAATAAGCAATTCAGTGAATTTTTG  
ATCGAGTGCGGTATAAAGAGGCAATTAACAGTTCCTTACACTCCGCAGCAAAATGGTGTGGCCGAACGTG  
CTAATCGGACCATCGTTGAAATGGCAAAAGTCTTCTAATTCATTCAAAGCTTGAAGAATTTTTGTGGGCAG  
AGGCTGTTGCAACAGCAGTTTTATTTGCGCAACAGATGTCCCAAAAAGCATTAGATGGAAGCACACCATT  
TGAGGTATGGAAGGATCGCAAGCCATCAGTACAGCACTTGAGAGTATTTGGCTCGCGGGCATTTCGACTC  
GACAAAGTCAGAAAAAGCAAGTTCCAAGCAAAGGGCAAGGAGTACATTTTTGTTGGTTACTCCTTTACAG  
CAAAGGCATATCGCCTATATGATCGCGAGAAGCGAACAGTTATTGAAAGAAGGGATGTCAAATTCATTGA  
AGGTGAGTTTGACATAGCAACAACCTGATGCATGCAGTATTTTCAGACAGAAACACCTTCACGACGTACATT  
ATCCCGTTTGAGTCAAATCATGAGGTTGCAAAAACCACCCAGAGCAACCTGCCGAGGTGCAAGAGTACAA  
CAGTGACTCAAATGAAGAAGAAGAGGAGGATTTTGTGAGCGCAAGCGATCCAGGAGAAGATGGCAACGA  
TGACGACAATGACCAAGTAGCGCTGCCACAAGTTGAAGCTGTAGTAAAACATGGGCGTGGCAGGCCAAA  
AATTATACGTACAGGTCAGCCAGGCAGGCCAGAAAGCAGTACCAATTGATCAATAGTCTTAATCAGATT  
GAAGACATTGAAACTCCGCAGTCAGTTGCAGAAGCATTACATGGCCAAAATGCGCAGGATTGGGAAAAG  
TCTATGCAAATAGAGTACGACGCTTTACAAGCAAATGAGACATGGTCAGTGTGTGAGCTACCTCCTGGAC  
AAAAGGCCATTGGTTCAAATGGGTTTACCGAATCAAGAGAGATAAAGATGGTAATATTGAAAAATTTAA  
GTCTCGACTAGTTGCACAAGGTTGTGGTCAACAATTTGGTGTCAATTACTGGGAAACGTTTTCTCCCGTAA  
TTCGATATGAAACCATTTCGCATGTTATTCGCAATAGCTGCCGAAAAAGAGCTGTATATGCATCAAGTCGA  
CATTTCAAACGCATACTTAAATAGTAAGCTTAATGAAACTGTGTACATGAAACAGCCGCCGAATTTTATTG  
ACAAGCAGCATCCAAATAAAGTCCTCAAACCTAGAAAAGGCACCTTTACGGGCTTAAACAATCCGGACGAGT  
TTGGAACAATACGCTCGATGAGGTATTGAGAGGCATGGATTTTAAAAGATGCAAAATGAAGCATGCTTAT  
ACGTCAAGCAAAAGCAACAACAATTCAGCTACATCGCTGTCTACGTGACGATTTAATCATAGTATGTCC  
CAGCGAAGAAGACATAGCCGTGATTAAGAAGAAGATTGCATCAAATTTTAAAATGCACGATGGAGGCC  
CATTAGCTATTTCTAGGCATGGAAATCCAACGCGACGGCGATCGAGGTTCCGTTTTCGCTGTGCCAGAAG  
ACGCACATTCAAGGCCTATTGGACAAGTATGGCATGAGCAATTGCCGTCCAGTAAGCACACCTCTTGACC  
CAGGTTTTCAAGTGGACTGCAACGACGATACTTGTGTAAAGGTAAATATAACGCAATATCAGTCATTAAT  
TGGTTTCGCTTATATACTTAGCAGTTTTTGAGCCGACCAGACATTTTGCATGCTGTAAACAAATTATCACAAA  
GAAATGCTAATCCTCATGGAGAACACCAGTCTGCAGCAAAGCACATTCTAAGATATCTTGCGGGGTACAAA  
GAATATGAAATTAGTATACCGTAAAAATGGCAAACCACTAAAAGGCTATGCAGATGCAGATTGGGGCAA  
CGATCGGCTGGACAGGAGATCCTATAGTGGCTACGCATTTTTCTGGCAGACAGTGCGTTCTCTTGGACTT  
CATCAAAGCAAAGCGTTGTGCGCATTGAGCAGCACTGAAGCAGAATATATTTCTTTGTCCATGGCTGCCAA  
AGAAGCAGTTTATCTACGCAGGCTACTTAGTGAGATGGGATGGTCAAAGGATACAGAGCCGTTGACTATA  
TGTGGCGACAACCTAAGCGCGCAACATATTGCGCAAAATCCAGTCCATCATAAGCGCACTAAGCACATAG  
ACATAAGGTATCATTTTATACGTGAAAAGGTACAATGTAATGATATTGCATTAGAATACGTACCTACAAA  
TAATAATGTTGCAGATATACTAACAAAATGTTTAAGTAAGCAAAAGCACGTAGGCTTTGTAAAAACACTT  
GGATTGAATTAAATTTGTTATTTTGCAACTGATTATAATTAGCTTAAGAAGAAGTGTTAAAATAGTGACAA  
TAAGCTGTAAAGCTTCTTTATAATCTGGCAACATTGTATCAGCATAGTACTCATTCTGTAATTGAGTACTTG  
TTCAGATTTTTGTACTCATGCTTGAAGTTTCCATTAAACATTTAACC GAACCACTACGTGTGTTTTCTTTAT  
GTGCATCTTAGGCACACTAGAAATTTCCCAACA

>160\_rnd-1\_family-331\_\_LTR\_\_Gypsy

TGATGTCCAGTCTATATGTTGTTTGGTTAGTGGTCGAAGCCAATTACCGATATAAATATCGATATCGACAT  
TGAAACACTGGACGATACAGAATCAAACATGCCAGACTAGGTAGCCTTAGATAGGGAATATGTAAGACA  
AATTTTCGTCTTCGGTCCCTGAATTTGACGGTAAAAAACTGTCACTAAATCGTTCTTTAACAGCCTTAAGGC  
TTGTTGAACGAATAAAGGGCAACCAATAGGATTTGGCTGTAGAAGTCATAAAATCAAACCTAATTGGCCC

AATACTATACAAATGCCAAGACGAGACCACGATTAATGTTCATTATTAATAAATTA AAAAAGTAGCGTCAAA  
GGTGAATCCATTGACTTGCTTAAGGCAAAGCTGTAAACGCCCAACAAAAAGGCAAAACAGCAGCTCAAT  
TTACGGCTGAAATCGATAAACTTGCGTAAGCAACTCGAGGCAGCTTATATTGACGATGGCCTAGACTCGG  
ATAATGCAGAGAAATTCTACCAAAGAGTCAATATCAACAATGACCAGAAATTGTGAATATGAAAAGCTCC  
GCATAATACTAGAAGCTGGAACTTCAGCACATTTAATGATGCAATGAGTAAATACATTCATTGCAGCAC  
TGAAGTGACTGGAAGTGTGAGCACAGTATTATATCAGCGAGGAAGACATAAAGNGGCATTGATTATCGCA  
ATTACCAAAGAGGTAGAGGCAATGGNCGCGGTAATCATAACGCAAACCTATAACAACAATAGCAATGGCA  
GAGGACATTATAGACGTAATGCCCGTGGTAATAACCGAGGAAGGAATAATTCCAACCGAGGTAACAACC  
AAAATAATAACAATAGAGGTAATGTCCGAGTAACCTGAAGGTAATTTCGGAAAACCAATGAGACCCCTCAG  
ATGTTTAGAGCCAATAAATGGCACAATAAAAAACCATCAACCTCAACCTCAGCATATTTGTAAAACCTTGAC  
AATGAAAGAACAGGTAAATCCTTTGCACTGTTGCTTGATACTGGTGCAGATATATCTATATTA AAAAGAAA  
ATGTAGATATATTTGAAAACGTAAACGAAAGAGTTACTACCCAAAAATCGGGAATTGGCGAAGGAACAA  
TTTGTTCAAAGGCTTGGCCTTTATAGAACTCACTACAGGTAAATACATAATTCCGCATAACTTCCATTTA  
GTCGATCAAAAATTCCAATACCTAGTGATGGCATACTAGGCATAGATTCATAAAAACAATATAATTGTC  
AATTAGATTTCACTCAGAGTGGCGACTCACTAATTCTTCGCCCAAACAACCTTAAATTATCCGATTAAATTA  
CAAATACTTCATACTTGTGACAATAATGCCACAGTACTCCCAGCTCGTTCCGAAGTTGTCAGTGAAATACA  
AATACCCTCAATAAAAAAATCAAATTTTGATATTAATCAAGAAATCGATNAAGAAATTTATATCGCAAAT  
ACCATATCCGACCACAAAAATACTTATGTACGAATTTTAAATACAACAAATACCAATAAGATCGTCAATT  
TAAATAAAAAAATATGAAACCTTAAATGATAAAAGAAACCAACGAAGAAACAAACAACCTTCGTTATGA  
ATAAATTAATTA AAAAATTTTCCGCCTTTATTCAAAGTCAATTA AAAAGATTTATGTACCAGGTATACAGAC  
ATATTCGGACTAGAAACCGAATCAATAACAACAAATAATTTTTACAAGCAAAAGCTTAGACTGAAGGATG  
AATCAGCCCGTATAAATAAAAAAATTATAGGAGTCCTCATAGCCAAGTACAAGAAATTCAAGCCCGAGTAC  
AAAAATTAATAGACAATAAAATAAGTTCGAACCGTCAGTCTCATAATATAATAGCCCACTCTTACTAGTCC  
CGAAGAAGTCTCTTCCGGACTCTGAAAAGAAAAAATGGCAATTAGAAATTGACTATCGTCAAATTAATAA  
AAAGCTATTGTCCGACACCTAGAATTGATGATATTCTAGATCAACTATTTAGAGCAAAATATTTTTTCATGC  
CTAGACTTAATGTCTGGCTTCCACCAAATTGAACTTGAAAACAGTTCTAGAAATATAACGTAATTGTCAAC  
AAGCTATGGCTCATATCGCTTTACGCGATTACCATTTGGATTAAAAATAGCCCCAAACTCATTTCAAAGAA  
TGATGACAATAGCATTTTCTGGTCTACAACCATCAGAAGCATTTCTTTATATGGATGATCTAATAGTAATC  
GCTTGTTC AAGAAACATATGGTCAAAAACCTTAACCTGATGTTTTTCGACAAATGTAAAAAACTCAACCTGA  
AACTACATCCGGTAAAATGTTTCATTTTTTATGCATGAAGTCACATTTTTTGGGACACAAATGCACTGATAAG  
GGAATCTTGCCAGACGACAAAAAATACGACGTGATTAAAAATTACCAACTCCCACACGATGTGGACAGCG  
CAAGACGATTCGTTGCATTTTGTAAATTACTATACGCGCTTTATAAAGAACTTTGCTAACTATTCACGTCAC  
ATAACAAGATTATGTAAAAAAGACGTNAAATTTCGAATGGACGTCTGAATGCCAGAACATCTCAAAACAG  
CACTAATAAACCTAACGTTGTTACAATATCCAGACTTCACCAAAGAATTCTGCATAATAACAGATGCAAG  
TGAGCAAGCGTGTGGAGCAGTTTTAACTTAAACCTTTACTGGACTCCAACCTTCCAATTGCATACGCATCAA  
GATCCTTTACTAAAGGAGAAAGTAACAAGAGTACAACCTGAACAAGAATTAACAGCTATTCCTGGGTAAT  
AACACACTTTTCGACCATATATTTATGGTAACCATTTTACCGGTAAAAACGGATCACAGACCACTAACATCTA  
TTTTCAATGGTCAATCCAAGTTCACAATTAACACGTGTGAGGCTTGATTTGCAGGAATATACCTTTACGGT  
AGAATATCTGAAGGGTAAAGACAATTACGTAGCAGATGCGCTATCGAGAATAACCATCAAGGAGCTACA  
AAATATAACAAGAAACATAATGAAAGTCACTACAAGACAAGCACGTAGACAAGAATCCTGCGCAGGAGA  
AAAAGAAATNGAATTGCCTAGGCAATCTATAGAAAAAGCTTCAAAGCCCAGAGTGTACCAAGTCATTAAC  
AATGACGAGGTACGAAAAGTAGTGACCTTGCATGTAAACAATATGACATGTTTTTTTAAACATGGCAGAC  
AAATTACAGCAAGATACGATGTTACCGATTTATATACTAATNAAACCATTGATTTAGATCAAATCTTTCAA  
AGGCTTGAAACGCAAGCCGGTATATATAAAATCAGCCAACCTCAAAGTGGCACCGTGGGAAAATATCTTTG  
AACACGTTTCAATGGATAATTTATAGAAAATGGGCAATCAAATATTA AAAATCTTTAAGAGTTGCGCTACTC  
CACCCGGTGACCCAAATAAATTCTGAAAAAGAAAAATAAGCTATCTTGTCTAAACTACATGATGATCCCA  
TACTAGGAGGACCTACAGGCATTATAAAAAACCTTGGCCAAAGTCAAACGACATCATTTTTTGGAAGGTAC  
GTCTAAACAAATAAAAGACTACATCCGCAAATGTCCAAAATGCCAGAAAGCAAAAACCTACAAAGAACAC  
AAAAACTCCTCTAACAATAACAGAAACACCAATATCCGCTTTTCGACAGAGTAATCGTTGACACAATTATT  
ACCATTACCTAGAACAGAGAATGGGAACGAGTATGCAGTTACACTCATTTGTGATTTTACGAAATACCTC  
GTCGCAATTCCGATCCCAAATACAAGTGCAAACACTGTCGTTAAATCTATATTCGAATCTTTTATTCTGAA  
GTACGGTCCAATGAAGACGTTTATTACGGGTACACGGGCACGGAATATAAGAATTC AATTATAACAATT  
TGTGCAAGTATATGAAAATAAACAACCTTAACATCCACTGCACATCATCACCAGACAGTTGGAACAGTAGA  
AAGAAGTCACAGGACTTTTAACGAATACATACGATCATATATATCAGTTGATAAAACTGATTGGGGCGTA

TGGATCAAATACATCGTATACTGTTTTAACACGACCCCCTCTATCGCACACAATTATTATGAGCAAATTCT  
TGGTAAGCACCCAATTTACCAATATAAATAGAATCGACCCACTATATAATGTAGAAGATTATGCTAAAGA  
AGTTAAGTTTAGATTAGAATCAGCATATAAAAGGTCTAGGATATTGCTTGAAAAACATAAAGCAAGAAGT  
AAGGAACTTTTTGATAAAAAAGTTATAGATTTTCAAGTAAAAATAGGAGATAAAGTCTTATTAAGAAACG  
AAACTGGCCATAAATTGGATCCAGAATATATAGGCCCATATACAATAGTTAACATAGAAAATAGGGATAA  
CATTCTAATTAAAGATAACAAAAATAGGACCCAAAAAGTTTATAAGAATATACTAAAAATTTTTAACGAA  
TAAAACATATAAATGTTCTATATGAAGTCTTTAT

>160\_rnd-5\_family-4735\_\_LTR\_\_Gypsy  
GTTTGGATTGTCTTCCCTTCTTCCTATCCTTGACTTCGGCACGCATCACGGACTATTCTCAGTCCAAATA  
CATCCCCATTGTTCGATGGCCGTGTCTAGTGTGGGAAGAATACGCCTACGTTAAACATTTCAGCGAATCTCT  
CAGAATACATGCGTGTGGTAGAAGAAACGGTCAAATTGAATGACATGTTCCACAGTCGCATATGAAAAA  
GCTTCTGAGCGTGGATGCAGATCACCTCCGAGATTTGCTAGAGGCGTTGGGCGCGCACCCACAGAGTGGCC  
AGGAGCTNAGACTTCTTAGGTTCCATGTTGAAGGTTGTGGCAGGCACACCGGATGCCGGCGATTTAGAAA  
AAACTCGGTTTCATTGAGGCACAATTAATTAATTCAAACAATAAGCAAATAGAAATTAACACAAGAATCCA  
GGTACAAATTAATCAACTTACTTCTACAGTCAATCAAATTCTCGAAACAATAAGACACTCAAGCCGAT  
ACTGGCCATTTATATGAGACATTGCTAGCCAGGAATCGAATGTTAATGATGGAGTTGCAAAATCTAATGC  
TGGCAATAACTCTTGCAAAGGTTAACATTGTTAGCCCAAACATTCTCGATCATTTCAGATTTGGCATCAGTT  
TGGCTGGAGGAACCCACTAACACTCCCATAGGGGATCTTATGTCCGTTGCGTCCGTGAAAGTTTTACAGTC  
CGTTAACATCCTTTACTTTATTATTAATTTCCGAAAATTAATTTGCTTGCAAAAAGGTGCGGATTTTCCC  
GGTCACACATGAGAATTTCTACTACGCATGATGAATAACGTCGTGGCAGATTGCGATGGGGAAACGCAT  
GCTCTCGAAAATTGCACCGCCTCTCCGGGGGCCACATTTTGTTCATCTAGCATCCGGGAGTTCATGCGCCAG  
AGAGCTCCACGCAGGCGGGATAGCGAATTGCGAAATCCAACCAAGCAATTTAGACGCTATCACTTTCGTA  
GATGACGGAATCCTCATCGTAAATGACAGGCCAGCGAAAGTGCAAGTGGACAACGGCACCGAAATCTGG  
GTACATGGCACGCACCTCATCACCTTCATCGACCGCGCTGCGGTGAACGGAACCTTTATTCATTAACCATAA  
CAACGTGCAGAATAAGGTCCCGGGTACTGCTAACACCCCCTTACTAAATATCACGGCCAGCCGGGATATC  
CTCAGTCTTCCGTACCTTCACCGACTGAGTGAAAGTAACCTGGAGGAGATCCAGAAATTCAAAGAGGCCC  
CGGTAGCAAAGCCGTATACCAGATAATATGCATCGTGGGAGTGGTATGCGTTTTGCTCATCGGCATCGGT  
CTTGCGTTTTGGCGAATCACCAGCGCCAGAAAGTCTGCGCTACAGTTAAGAGAAGTGATCGCAGAAATAG  
GGTCGGCCGAGGGCGGCCTTGGTCTTAAAGGGGGATAAGTTAAGCGGAGTCAACGAACGGTTGGCCAGA  
ATATGACTCCGACCACAATTGCTGAATAAGCATTGGGCGCGATGTCGTTGCATAGCCGGCAGACACAGCA  
TATTTGCGTGGCCGCTATGAACGAAGAAATAATTTAAGAATCACATATTCTGTAGCTTTAAGCCCTAAGA  
ATTGTATCGCATGTTTTTAGTTCTGAAATAAACGTCGTTAGCTCAACACGTCAGTACTCCGGCACCAAGTC  
GTCAGCGTAAACATAATTGCCAAACGGGCAACAAATAAATGTCACTTAATCAATACACTCAAAAGACTC  
ATAATTGAGTCGTCAGCGTAAAACATAATTGCCAAACGGGCAACAAATAAATATCACTTAATCAATACAC  
TCAAAAGACTCATGATTGGCGCCCACTAGTGGTAGTTACGATTACCCACGCGATTGCAAAGAAAAAAAT  
TCTTACAAAGTGAACATTAAGTCGCGGTACACCAACAGTGCCGCGCAGTGAACACTACAANAATAAGAA  
ACAATAAGCTGCAGTCACCAGTGAATTAGTGATAATAGTGACAGTGAGTTAACAAAGTGCGGTGCGCGCAG  
TGAACACTACAACAAGAAGCAATAAGCTGCAGTTACAGTGAATTAGCGATCATAATCTCGTGATTACAA  
AGGTGCGCTCAAGCGCAGTGCATTACATATATTTTTACACCGAAGCCGCTGGAGCTCTTCGGGCAGCG  
GAGACTGCGGCGAAGGGAGCGACTACGAATAACAAGTGCGTGACTGCGGCGTTGGACCCGCAACGTTGG  
CTGGTGTAGTGACTAAAATAAATCATAAAAAATCATGTAAAGTGGGCACTTTAGCCAAATCTGTTATTAAATC  
TGATCGAATTAAAAAACAACAAAGAGAGAGAGAGAAATCTTGATGCGT  
TATATTTTGCAACAAATCATCTGCTAGAGTAAGAACAAGTTTTTGAGAATTCGATTTGACAGCAGTAA  
ACGAATTTTGTAACAAATTAATTTGTTGTTACTTTTTATGCCACTCTAAAAATTGTGCTGCAACGGC  
ACATACTTTCTTGCTTATGCGCTTCTCGTGGTTCAGAGCTGAGGCGTAATTCGACCCATCTTTGACTTTCC  
GTTTTGTTTTTGCGTCCGCTAGACCGCGCGTGCATTTATTTGTTTTTGCTTTGAATGCCCATGAAATCGTCT  
TTCGGTCAGTATAGGACCCCCCGCAAGAATCTAGGCGACTCGGATTCTGACTGTGACAACCGCATCAGA  
ATCCCGGCTCCACGACTTGCCCTACAGTCCCCCAACTTCGAACAAAATGGATCCAGAGCAACTTAGAG  
AGATAATTCAAACGGCCATAAGCAATGCCCTAACAGAACAAGCCAATGCAAACCAGCAAAGAGAGCAGC  
TATTAGTGCAGAGAATTAATGAATTATCCGAACAAATGGCAGCAGCAAACGTTGCTGCCCCACAAGTAGT  
AGCGTATGCTGCTATTGAGATTAGAAATGACATTGCTGCGACGAGCCACTAGACGCCGTCAAATGCTTA  
CCTGAGTTTGCAAGGAATACAGGAATCTCGGCATTATCGGGCCGTNANAATTATAGGAAGCAAAATAAAGG  
GCCCCGCGGATGCGGTGCTGGCCTCATTTGGCACTGTGATNTCACATACAGTGACAAAAGGCCGATCCAT  
GTAATTGAACAAGAGTTAGGCACCTTGAGGCAGGGCGGCTTGCCCCTACTCCAATATTTTGACGAAGTGG

AGAAAAAACTAACCCTACTGACCAACAAGGTCAATATGTCTTACGAGCCCGTTATGGCAAAGGTCTTTG  
TGAGAAGTTCCGTGACGACGCGTTGCGCGTTTTTCGTATCGGNGCTTAGGCGCAATCTCACGGATGTGCTCT  
TCGCAGCCAAGCCTAGAGATCTGCCTTCGGCACTGGCGCTTGCTCAGGAGGTGGAGTCAAACCACGAAAG  
ATATGCTTTCGCGGCTAATTTTGCCAAAAGCCAAGAAGAAAGAGAGCGTAGGCCGAATACATAGACACA  
GGGCCGACGGCAAGATAGACATTCTGAGCCTCAGACAAATGGCGCAAAAAACCCTCATTTCAACAGGCA  
GCAGAAACAACAGGGTCAAGTCCGATCAACGAAGTGGTGGCAGCAAAACAAAATGGTGGACAGGAACCC  
ATGGAGGTAGATCCTTCATTTTCAAGGATCCTCCAACCCACACAGGCACCGGGGTATCTGAATAGAAAAC  
AGGCAACATCTGATCACACGGGCTTTCAAAAAAGGCAACAAAGGGTGAATCATGTAACGCAGGACGCGG  
AACAAAGGATCGCAAATGTATGCTAATGCCGCTCTAGCGCAGAGGCGCAAATTGAGGATGACGTGAGCG  
CTAGCTATGATTCAGATGCTGTTAATTTTTTAGGGGTAGATCCCTGTTACCCGTCATCGGGCGAAGAGTAG  
CAGGGGCGGATATGAAATTCCTCATAGACACGGGCGCGTCTAAAAACTTTATCAGACCACATGAAGGGTT  
AAAAGGCGTCCGACCAGTAGATTGTCCATTCACAATCCACTCGATTATGGTACAACCTAGAATCACGCAA  
AAATGTTTTGTCTCAATGTTCAACATAAAGGCAACATTTTTTCTTTTATCGGACCTGTCAACTTTCGATGGA  
ATAATAGGCCTCGACCTGTTAACACAGGCAGGGGCATCGCTTTGCTTAGCGTCAGGTCAGCTTAAATGGG  
GTTTCAGAAATTGAACAAATTTCTTTTCACGCATGCACTAATGTCAATTTCTACTAACGTAGATTGCTCAGAT  
GCACCTCCTTTAGTAAAGAACAATTCCTGAAACTGCTAAAAGACAGGAAAAGG

>9\_rnd-1\_family-308\_\_DNA

TTAAAATATGGCTGCCATTTAACAGTATGATATATAATATTGCCAGGTTGTTTTTCTGCATTAACATAGGA  
TGTTATGAGAGAAATAGAAAAATGAGAATTTCTCAAAATCTGTACCGATGATTTTAATGAAATAAATAGC  
AAAATGATTGATAAATCGTGCTCTATATGCACAACCTACCGTGCAATTTGGGNCCGCGTTTCGCAGAAATTA  
ATAATAAAGCTTAAAATATGGCTGCCATTTAACAGTATGATATATAATATTGCCAGGTTGTTTTTGCATTA  
ACATAGGATGTTATGAGAGAAATAGAAAAATGAGAATTTCTCAAAATCTGTACCGATGATTTTAATGAAA  
TAAATAGCAAAATGATTGATAAATCGTGCTCTATATGCACAACCTACCGTGCAATTTGGGGCCGCGTTTCGCA  
GAAATTAATAATAAAGTTTAAAATATGGCTGCCATTTAACAGCGCGATATATAATATTGCCATGTTTTTT  
TTGCATTAACATAGGATGTTATGAGAGAAATAGAAAAATGAGAATTTCTCAAAATCTGTACCGATGATTT  
TAATGAAATAAATAGCAAAATGATTGATAAATCGTGCTCTATATGCACAACCTACCGTGCAATTTGGGGCCG  
TTTTTCGGAGAAATNAAATAATAAAGNTTAAAATATGGCTGCCATTTAACAGTATGATATATAATATTGCC  
AGGTTGTTTTTTTGCATTAACATGGGATGTTATGAGAGAAATAGAAAAATGAGAATTTCTCAAAATCTGTA  
CCGACGATTTTAATGAAATAAATAGCAAAATGATTGATAAATCGTGCTCTATATGCACAACCTACCGTGCA  
TTTGGGGCCGTTTTTCGGAGAAATAAAATAATAAAGNTTAAAATATGGCCGCCATTTAACAGTATGATATC  
TACATTAACATTTTTTGCATTAACATAGGATGTAAAGAAAAAATTGGAAAAATGCAATTTTTCCATAAACTG  
CGCTATTAAGTATGACTTAATACTTCTCATATAATTTGCTTTGACTTATTAATTTAATTNACTGTGAGTCCT  
TTCCGTTTTTTTCATGATAACATATTATTCAAATTGGATTGGTTCCCGCCCAATTCTGTACAAAATTGTTCAA  
CACTGATGCCAGGCAGTGATTCAGTTCACGTAGGAANTAGCAGTTCGATAGACTTTATGAATGAACTATA  
TGAGGTTGGTTTACAATTAATTAATTTTCTGAAAATCTGTACCGTCCATTTACTTAAANTTAGTGCCTAAA  
GCTTCTTAAAATATGTATCTACAAGAGGGTATACCGTGCAATTGAGGGCCATTGTCTCTGAGTTAAGAAATA  
AGGGCTCGAGACAAGGTTGATTTTTTTTGCGGTCAATTTATATGGGGCTGACATGGGGGTTGTTGCACTCT  
TTTCCAAATATCTTAAAATGGTACCGACGATTTTAATCAAATTTTTTCACAGTTGGCTAGGTGAAACTATA  
GGCTTTAATCGTGATATATGCGGTTTTTCGGGGCCATCATCCCTAAATTTAGATATTTATGGAATGGTGAAA  
CCTAATATTTNAAACCCCTTGTTTTACCCATATTATAAATTAATAATTCAAAAAACAAATGAATGTAGGCAGTA  
AATAATTTAATTTTTTGCATTTCTGCATTTAAATTTATTNGGTTCCGTGCTTAAAAACATAAATAAATGCAT  
TTAAAAGTGACCGATTCCTTTTCCGATACCAAGTACCAAAATTCGACGCTAAGTCACCGCCGCTAATTTGA  
CGCACATACAGAGTGAACATCGGGAATATAGCGGCGATCAAAAAAGTACAGCGCGCGCGCGCCAGACGG  
GCGACAGTGAGACCACGCTTGACATACGTGTGCACAGATGCGCGCCGACGCCGACGTCGGCGTCAAGGG  
CCGTTAAGGCGTCGCGACAGAGGCTGTACAGTGGGACGAATTCAACTCGCGTGCGGTGAAAAGTTGAATT  
CGTCAGTACAGCCAACGCGGGCAATGAGAACGGGAGTGTTCAAAACGAAGTATATAGATTTATATATACA  
CAGATAATAATACAAATTGTAGAATGTTTTAACAACCTATTTAAAGTATTTATTTTTATATAAATAACATGT  
TTAACTTATAAACATATATGTAAATAACATGTTTCATCGTCATGTGTACTTTTACTTATGTACTTTCACAAT  
TTTTAGTTGTTTCGTCTGATTGGCCGACCGGGCGCTGTCCGCAAACACGCCCCGCTCGCCTCGACCGCCACAG  
AGAGATTTTTTATTGTTGCTCATTCTACATATGATTTCAATTGCAAACAGAAATTTTAGAACAGTTTTGGG  
AGCACTTAAAACCTATGCAACGTTTACCAGTTTGCAAGGTGGAGAGGGACATGACAAGAGATACATTTAAC  
ATTTAATCTCGACTGACCTACATATAAACATAACATGACATAACAGACTCTGTACATTTAACATATTGTCT  
TAGGTCAGTTAGCTGGGGAAATTTCTGCACGATCAGCTGGCAATGCTGTGCTGTGAATGGCAAGAATACA  
TAAAAATCAAATGGGCACGCTAAAGACATGTAAGTAGAAAATTATTTTAAATTTAACAATTTTTTTGGCTA



AATATACTAACAATGTCAATGTACTTCCACAAGGTGGCATCTTTATGTTCCCATAGGTTAGCATTCTACAT  
AAGTTGGCAGCCCCTAACATAGCGTCACTTTTGGATTCCATGCTATTTAATTCAAATGAAATTTATATGCA  
TATTTATACATATGAACATATATATTTATAACATTTGTTATTTATTTGTTTATATTTTAATCTAACAAGTTTG  
AAATGGCTCCAGGAAACGCAACACGGCAAGATTTTTATTTATTGACTGATTGTGTTCGCCTTTTTTAAAAGC  
CTGAACCCATTAAAAATGGGTAAAAGGGGTATAATGTATTTGTGCAGCCGTATGTAACAGGCAGAAGAAA  
GGATCTTCAACCACTTAAAGTATGTATTCTTGATCAGCATCAATAGCCTAGTCGATCTAGCCATGTGCCTC  
TGCCTGTCCATGCAAATCAGGTATCTTTTATTCTATAGCTATAGCGGCGTTTGTGTGTGGTAGGAATGGTAT  
CCCCTAGCCGTGCACTCCCAACTANAGCATTCTTACTTGTTTTTNTACCTAAAAGCTATTGAAAATGAATG  
AACATTTTTTTCAAACGAACTGGTAAATAAAGGAATTTTAAATTTTGACATAACTTAGTCGTTAGTACATTG  
TTAAAATTTTTTTGAAATTGTACTGAGTTTTTAAAACCTAAAACTAACGAGAAAGAAGGGCTATCTTCGGC  
ACGCCAAAGATCTAATACCCTTGCAGACCCAACCTTTTCATAATGCTCATAGTGCTTTGCCTCTATCTAAG  
AAGTACCGGGAAAAATAGTAAATGCCGAGTTTGGTCAAGATATCTTGATAAAACAAAATGTTTTTTTCATA  
CAACTTAATTTTCGACCGATCGTTCCTATGACAGCTATATGATATAGTGGTCCGATCTTTATAGGATTTTGC  
ACATATATGAGGAGTAAAGTAAAACTAATAAATGCCGAGTTTGGTCAAGATATCTTGAAAAACATAATG  
TTTTTTTCATACAAAACTTAATTTTCGACCGATCGATCCTATGGCAGCTATATGATATAGTGGTCCGATCT  
TAATAGGATTTTGCATATATATGAGGAGCTTAGTAAACTAATAAATGCCGAGTTTGGTCAAGATATCTTG  
AAAAAAACAAAAATGTTTTTTTCATACAAAAAACTTAATTTTCGACCGATCGTTCCTATGGCAGCNATATG  
ATATAGTGGTCCGATCTTTATAGGATTTTGCACATATATGAGGAGTAAAGTAAAACTAATAAATGCCTAGT  
TTGGTCAAGATATCTTGATAAAACAAAATGTTTTTTTCATACAAAAAACTTAATTTTCGACCGATCGNTCC  
TATGGCAGCTATATGATATAGTGGTCCGATCTTAATAGGATTTTGCATATATATGAGNAGTAAAGTAAAA  
CTAATAAATGCCGAGTTTGGTCAAGATATCTTGAAAAAAACAAAAATGTTTTTTTCATACAAAAAACTTAAT  
TTTTTCGACCGATCGTTCCTATGGCAGCTATATGATATAGTGGTCCGATCTTAATAGGACTTATGAACATAT  
ATGAGGAGTAAAGTAACACTAATAAATGCCGAGTTTGGTCAAGATATCTTGAAATAAACAAAAAATGTTTT  
TTTCATACAAAAAACTTAATTTTCGACCGATCGTTCCTATGGCAGCTATATGATATAGTGGTCCGATC  
>9\_rnd-5\_family-2324\_\_LTR\_\_Pao  
GAGCTTAATTTTCGATCAACATTTTCCGGTGGTTATACCGTATATTCGNACTTTATCGCGATGTTTGAGTCAG  
TTGTGACAAGGATGCCGAGCTGTCTAACATTGAAAGGTTGCAGCATCTTCGTTTCATGTTTGNCTGGCCCT  
GCGTTGGATTTCGGTTCGANCTTGGAGTTTTCCGGTGCCAATTATCCTGTGGCTCTGGATATCCTNAATAG  
AAGATTTAGTNACAAACGNNTTGTTTTCCAGGCACACATCAATGAGATTCTTGGGCTCAAGAGGGTTGAT  
TCGGAGTCGGCTTCAAACTGCGTGAGTTCTCGGACAAGGTCAATTCGCATATGCGTGCCTTACNGAATTT  
GGGCAGTTTGGAGCAAATTTCCGGATGCATAATAGTCCACGCGCTGCTTCAAAGGTTGGACACCCAGACT  
CAGACCAAATGGGAGGAGGCCGAGGCATTGACAAAATCCCGACAGCCGATGAGTTCTTCACATTTCTGG  
AAAGGCGTAGTAAGGCTGGAGAGCGTGCAACATGCCATGTCATCCCATATAACCAATTATCGGGTGGGCA  
AATCCAACCATAACACTAACCACAGCAAAAGAGTGCTTGTAGCTGAGACTAACCAAAATGGGCGCAGTTT  
TTGTGATGCGTCTGGTCACGGGATCTACACATGTAGTAAANTCGAGAACTTGTCTCCATCCCTTTGGCTG  
CCNNAGGAAGGGACACCAAACTCGGTCTTGCAGTAGTAGTCATTGTCTGACTTGTGGAGGAAAGCATCAT  
ACACTGTTGCATTTTGCCACTTCAAGAGAAGCTGACGCGCCGACACCATTACATACATCGGCTGATTTGGG  
CGCCGCCACTTCGACGCACTCTCACTCCACTACCTCTCTTGCTGTCCAAGGTCTTCAGTCTGGTGTGTGCT  
CCTGGCCACTGCAGTGGTACTGGTAAAGAATAGTTCTGGTTCCTTGTTTCCCTGTAGGGCCTTATTAGACT  
CAGGCTCGCAGTTGCACATGGTCACATCCCGTTTCGCACAGAGACTTCAGTTAAGGAAAACAGGTCGTC  
GACAGTTGTTCATGGGTCTCGGAGACACAAGCGTCTCTACTGAAGGATCAGCCGTTAGGATTAACATGAAG  
TCACAAGACTCAGATTATTCAGCCACCTTTGATGCTCTTGTGACTCCAACAATTACCGATAGTCAGCCCAG  
CTTCGTCATCGATACATCAGACTGGAAAATCCCTCGAACATAAGGTTGGCTGATCCTGCGTTCAACAAAC  
CACAGCGAGTGATCTCTTAATTGGAGCGAGCCTTTTCTATGAGCTTTTGTCTGTTGGGCAAATTGTGCTTT  
TGCCAGGACTACCTCTTCTGCAAAAAAATCGTCTTGGCTGGGTGCGTGACCGGTGGATTTGAGAGACCGCG  
CAGTACCTCGTTGTTGGCTGCCGGCCGCACTCCTAATAGCGAAGCTAGTCAGTTGGACGTCCGTCTGGATG  
AGTTGGTTTCGGCGGNTTTGGGAAATTGAAAGCTTGGAAGAGCCTACAGTAAAGGCCACCAAAGAAGAGG  
CGGAATGCGAGCAGCATTTTGGCAATAACTTCTCCCGTTTACCATCCGGCGAGTATTCAGTGCGGTTGCCT  
CTGAAGCGGAGTGACAGAGCTTCTAGGAGAGTCTTATGGCCAGGCTCATCTTCGATTTCTCAGTCTTGAGCG  
AAAATTGGGTGCGAATTCGCATCTGAAGGAGCAGTATTCGGCATTCATCAAAGAGTTTCTGGATCTAAAT  
CACATGTCGCGAGTTAGTCCAGAGTTGAGTGGCTGTTGTAAATACTTCCTCCACATCATTGCGTCTTGAA  
AGAAGACAGCACCACAACCAAGTTGCGTGTTGTGTTTGTATGGCTCAGCAACTACTGATTCTGGACATTCTC  
TTAATGATGTACTGATGGCGGGACCAATCATTCAACCTAAGTTGTTTCACATTCTGATTCTCGCTTCCGCACA  
TATCCTGTTGCTCTCACAGCTGATATTTGCAAAATGTATCGTTGTGTCCGAGTGACTTCGCCTGATAGTTAC

TTTCCAGTGCATCCTGTGGAGGGACTCGCCTCAGAAGGATATCGAAATCTTTAAATTAGATACAGTAACAT  
ATGGGACCAAATCAGCATCATTTTCAGTCCGTGCGCGCAATGCACCAGTTGGCCTTTGATGAGCGTGATGC  
ATTTCCAATTGGATCGGATGCCATCAAGCAGGAGTTTTACGTTGACGATTTGATATCCGGAGCCAACTCAG  
TTGCTGAAGCCAGAGAGAAAATTCGTCAGACGGCTGGGATATTGTCTCGTGGAACCTTCAAGCTTCGAAA  
GTGGTGTTCCAGTCACCAAGAAGTACTCAATGGAATAGCTTATGAAGATAGGGAACAGTACTTAAAGTTC  
GATGATGGAAGCGATGTCACCAAGGCCCTTGGTCTTGTATGGGATCCAGCGATCGACCAGTTGCTATTTTC  
ATTTTCTGTTCTAGAATTGTACTGTAAACCCTGCAGGCGATCAGTTCTGTCTATTGTTGCCCGGTTTTATG  
ATCCGCTTGGACTTTTGGGACCAGTCATAACTAAGGCAAAGATATTTCTTCAACAGCTTTGTAAGGACAAA  
TTAACTTGGGATGAAAGCTTGCCGATTGCACGTGATACGACCTGGAGGGAGCTATGCAGCAGTTTTCGCA  
ACATTCGCCATGTATCGTTTCCCAGAGTAGTACTCTTCGAAGGAGCTGATGTTGAAATACATGGATTCTGC  
GATGCCAGTGTGGAGGCCTATGGAGCCTGCATCTACGTAGTGGCCAGGAGTCCACTAGCCACAAGTCGTA  
TCCTTTGCTCCAAGTCTCGAGTTGCGCCATTAACAAACATTGACTGTCCCAAACTGGAATTGTGTGGAGCG  
AAGCTGTTGGCTAGTCTGATGCATGAAGTCAAGCGCACAGGCATCTTTGTCAGTCAGTTTTATTGCTGGTG  
CGATTTCGTCCGTTGTCCTATCCTGGATAAGAGATGAGCCCTTCAAATTTAACGTTTTTCGTGGCAAATCGTG  
TGGCTGCCATCAAGAACTCACTGCCAGTATGGAGTGGCGATATGTTCCGACGGACCGAAATCCAGCTGAC  
ATTCTTTCTAGAGGCACAGTTCCCGACGTCCTAGCCCAGTCGGAGCTCTGGTTTTCATGGCCCATCGTATCT  
ATTAAATGGTCGCCTAAATTGGCCGGCGACCTGTCTGCCTGAAGCTCCAACCATTGAATTGAGGAAAAGA  
GTACTAATTCTTAAGTCTCCACATGCAGATTTAACNCTGGGGATGCAAGCACGCCAACTCTTTTGGTTCCA  
TGCAGCGCACATTCGGCTATGTGTACAAATTTATGAAGCGTATAAGGCATCATGGACTCACTGTTGCAGA  
CATTCATCACGGCACTCGCATTCTTCTTCGGGTACAGAGAGCGAACTTGTGATGACATCAAGGAGATTCAT  
TCTCATGGAAATGTGAAAAAATCCAGCTCCGTTGCATCTCTTGCACCATTTCTGGATGAACGTGACCTCCT  
CCGCGTCGGTGGCCGGCTTAACAATTCGTCCCTGGACTATGATGCGCAACACCCCATTTACTGCCTCGGC  
GTCATGCAATCACCTTAGCTGTCATCGTTCAGTTTCATGAGAGGAATCTACACCCTGGTCCCCGTGCACTT  
CTANCCAAAATTCGACTTAAATATTGGCCGATTGGTTGGATTAAGAACAGTCTCTAAAGCAGTCAGTAGA  
TGTGTGAGGTGCTTCAGAGCGAGGCCCATTTTTGTGCGAGCCTATGATGGCAAGTCTTCCAAGGGAACGTCT  
GGAAGTCGTTTCGAGCCTTCACCGTAACTGGAGTCGATTATTGCGGACCCTTCTTCTATAAGTCGGAAGTTC  
GTACGAGGCCATCCATCAAGTGCTATGTCAGCGTCTTCATTTGTTTCACCAGCAAGGCAATGCACCTAGAG  
CTAGTCAAGGACCTATCGACTGCTACATTTTTGAGTGCCCTGAAGCGATTCATCGCCACTCGTGGCAAACC  
CAGTCAAATTTGGTCCGACAACGCAACAACTTCGTCCGATCGAAGAATGAGCTGGTGGATTTGAAACGT  
CTCTTGCTTAGCGATCCCCACATGGAAGCAGTTCGGCAGTTCTGCCTCGCCGATGACATCGAGTGGAATT  
CATCCCCCCCCGTTCTCCGCACTTTGGTGGACTATGGGAGGCGGCAGTGAAGTTGGCCAAGCACCATTCTA  
TCGCTCTGTCGGCCGCTCTTTACTTACTTTTGAAGAGCTTCGTA CTCTTGTTTGCCAAATCGCAGCT

>160\_rnd-5\_family-743\_\_RC\_\_Helitron

ATATTTTAATATTTTAAAGATTTTTATTTTTACAGAAATTTTCATTGCTTGTGCGGACACACACACACACAC  
TTAAACGATCCCTAAACATAAAGAGAGAGCATTGAGAGCTGAGAGTAAGTGCGAGCGAGATAAAAGTTA  
ACAGCGTTGTGCTTCTATCGCACAAATCATATGGAAGAGAGTGCGCCAAGCACTTTTCTGTAGAGTAAGC  
GGTTCAAAAATACATCATTTGTATATCTTACTCCCTTACTCGCGATTTTGGACCAGATGCCACCGATACTTT  
TCGTGCCTACTTTCTGTACTCATGTCCAGTCTATATGTTCTTTGGCTAGTGCTTCGACTCATTTCAGATCTT  
GCAGCTGGTTTGGTTCAAACCTTTGCTGGTAAAAATAGATCTTCTGGAACATTTATTATGATATTCTGTCTA  
ATGCCAATGTTTTTCAATCTTGATTTTAAAGATTGTATGACCTTAAGGCATTGTTTGGCATGTTCTTGTGTT  
AGTTTTTCTCTAATGGAATCTACTGCATGTACTATATTGTTATATTGTTTTATCAATATTTGTGCATGGTAT  
ATTAGTGTTTCTACCTTTAGAGGTATGCCTTTATTGATGCATTTATATGACTTGTCAAATTGGTGTTTAAAG  
TCATTGATATTTTTCACTAATATACTCCATTCCATATTATTGTAATAGATATCTATCGATGCAGTCGCACCA  
TTAATATGAGTATTGAACATGTCCGTGTATTCGTATTCGAAATCACACACTTTTATAAAATCTCTATGTAAT  
CGCAGTACGTTTAATACGCGAGTACGAAAGTCTGGCTCATCTCTATACGTAAACCTAATGATTGCCTCTAT  
GTCTGACATATTCAAATATATTCATACCTTATCTAGTCCGTCTGCTCTACTGCTATAGCGTTTCTTAATTTT  
CTTTGTATGCATTGCATACACTTTCAATACTAGTGATACAAGACATATTGTAGTAATTATTCTTTATGGTCA  
ATTACTTTTACGTTATTTATAACATTTGCGGCTGATTTTTCAANCTTGGATTTCGTTTCGAACCCATTTTAATT  
AAAATTTATNACATAAGTTGATGTAATGTTTTTAAATTCATATAATGTTTTTATGTAACATATAGTGTTTTT  
AGCTTTAAATGCCAATGTTTTTGTGTTTCAAGNTTCAATATTGCTAATAACACAAAATACTACCTAGCATT  
TCGCATAGCTTTACGGGCTATGCTGCTCAATTTTACAAAAATTTTTTTTTTATAATTAAAAGTAATTAAGGA  
TATAACTGCAACTGTTGTTTCATCGTTGCATGCAGCTGAGAGGCTAGTGAAGTGCCTGCGTAATATGAGCC  
AGAGCCAATATACAAAGTGGCTCTGGGCTTGGTTATACTTTATATTGTATATAGGGTGTCTTTTAAGGC  
ATATACACACTACAGCTCCCTTTTCAAAGAAATAACGTANCATTATGGATGTGTAGTTATTTAATGAACCTT

AATTATTTTGAACAACAAAATCTTTTGTATATAATTTTTTTTTTTGCTATAAAAATAATAAAATGTAAAAAA  
TGATAAAAATAATATGAATTTAAAAAAATTATTTAAGATTTATGGGAATATACTAATGTAAACATTTCAA  
GTATAAAGATATAAATATAAAAAACGTAAAATTCATTATAGTAATTTGTNTTTTCAAGGATTGATTTTTTT  
TTATAGTTGGTTGATCAGGCCAATGTATATGTATTTTTATACCCTGAACCCATTAAAAATGGGTATAAGGG  
TATATTGTATTTGTGCGAAATCCAAATGTATGTAACAGGCAGAAGGAAGCATCTCCGACCCCATAAAGTA  
TATATATTCTTGATCAGCATCAATAGCCGAGTCGATNTAGCCGTCTGTCCGTCCGTCCGTCCGTCCGTCCG  
TCCGTATGTATGAACGCAAGGATCTCAGAACCTATAAGAGCTAGAGACTTGAAATTTTAGATGTAGGTGC  
TCCTAGTTCCCGCGCAGATCGAGTTTGTTCGATAATCGATAACTTACTCCGTTTCCAAGCAATCGATAA  
AAATCGATATCGATATCCTGTTTTTTGGGCAATTTTGGTAAATAATAAGAGCTAGAGTCACCAAACCTTGAC  
ATATAGCTTCTAAAATAGAATATATATATGCATTTGATGTTGGAAGAAGAGGGTTCAGGGTATCCCCTAGT  
CGGGAGCTCCCGACTAGAACCTCTTACTTAGTTTTCTATAATAGATTATATATGCATTTGATGTTGGAAGA  
AGAGGGTTCAGGGTATCCCCTAGTCGGGAGCTCCCGACTAGAACCTCTTACTTGTTATTTGTTGTGAATTC  
ATAAAGGAACATAAAGACTTCATATAGAACATTTATATGTTTTATTCGTTAAAAATTTTTAGTCTATTCTTA  
TAACTTTTTGGGTCCTATTTTTGTTATCTTTAATTAGAATGTTATCCCTATTTTTCTATGTAACTATTGTAT  
ATGGGCCTATATATTCTGGATCCAATTTATGGCCAGTTTCGTTTCTTAATAAGACTTTATCTCCTATTTTTA  
CTTGAAAATCTATAACTTTTTTATCAAAAAGTTCCTTACTTCTTGTTTTATGTTTTTCAAGCAATATCCTAG  
ACTTTTTATATGCTGATTCTAATCTAAACTTAACTTCTTTAGCATAATCTTCTACATTATATAGTGGGTCGA  
TTCTATTTATATTGGTAAATTGGGTGCTTACCAAGAATTTGCTCATAATAATTGTGTGCGATAGAGGGGGT  
CGTGTTAAACAGTATACGATGTATTTGATCCATACGCCCCAATCAGTTTTATCAACTGATATATATGATC  
GTATGTATTCCTTAAAGTCTGTGACTTCTTTCTACTGTTCCAACGTCTGGTGATGATGTGCAGTGGATG  
TTAAGTTGTTTATTTTCATATACTTGCACAAATTGTTTATAATTGAATTCCTATATCCGTANATATGTCCG  
TGTACCCATGAACGTCTTCATTGGACCGTACTTCAGAATAAAAGATTCGAATATAGATTTAACGACAGTCT  
TTGCACTTGATTTGGGATCGGAATTGCGACGAGGTATTTTCGTAAAATCACAAATGAGTGTAAGTGCATAT  
TCGTTCCCATTTCTGTCTAGGTAATGGTAATAATTGTGTCAACGATTACTCTGTGCGAAAGCGGATATTG  
GTGTTTCTGTTATTGTTAGAGGAGTTTTTGTGTTCTTTGTAGTTTTTGGCTTTTTGGCATTTTGGACATTGCG  
GATGTAGTCTTTTATTTGTTTAGACATACCTTTCCAAAAATAATGTCGTTTGACTTTGGCCAAGGTTTTTAT  
AATGCCTGTAGGTCCTCCTAGTATGGGATCATCATGCAGTTTAGACAATATAGCTATATATATAAATTATA  
TATATAAATATATATATAAATTATCCNTTGAAACGTGTTCAAAGATATTTCCACGGTGCCACTTTGA  
GTTGGCTGATTTTATATATACCGGCTTGCGTTTCAAGCCTTTGAAAGATTTGATCTAAATCAATGGTTTAA  
TAGTATATAAATCGGTAACATCGTATCTTGCTGTAATTTGTCTGCCATGTTTAAAAAACATGTCATATTG  
TTTACATGCAAGGTCACTACTTTTCGTACCTCGTCATTGTTAATGACTTGGTACACTTTGGGCTTTGAANCT  
TTTTCTATAGATTGCCTAGGCAATTCAATTTCTTTTTCTCCTGCGCAGGATTCTTGCTACGTGCTTGCTTG  
TAGTGACTTTCATTATGTTTCTTGTTATATTTTGTAGCTCCTTGATGGTTATTCTCGATACCGTCGTTATCCT  
TCAGATATTCTACCGTAAAGGTATATTCTGCAAATCAAGCCTCATACGTGTTAATTGTGAACTTGGATTG  
ACCATTGAAAATAGATGTTAGTGGTCTGTGATCCGTTTTTACCGTGAAATGGTTACCATAAATATATGGTC  
GAAAGTGTGTTATTACCCAGTGAATAGCTGTTAAATCTTGTTTCAAGTTGACTCTTGTTACTTTATCCTTTAG  
TAAAGGATCTTGATGCGTATGCAATTGGAAGTTGGAGTCCAGTAAAGTTCTGAGTTAAAACTGCTCCACA  
CGCTTGCTCACTTGCATCTGTTATTATGCAGATTTGGTGAAGTCTGGATATTGTAACAACGTTAGGTTTATT  
AGTGCTGTTTTGAGATGTTCTGGCATTGAGACGTCCATTGCAATTTTACGTCTTTTTTACATAATCTTTTTAT  
GTGACGTGAA

>160\_rnd-1\_family-187\_\_LTR\_\_Gypsy

GAGCTAACGGCCATAAGCCTTATAAAAACAAAGCTAAAAGGCCATGCGAGAAATTTAATAAGTAATGAG  
CAGACAATTGCTGCAATCATTACGCAATTATCAAATGCAGTAAATGGAGAATCGGTAGAAGTTGTATCTG  
CTAAGCTTCTTAATTTGCAACAGAAAAATAAAACGGCTAACCAATACACCCAAGAGGTGGAAAAACTGGC  
AAAGGCCCTTGAAGGCGCCTATATCAGTGAAGGTCTAAGCCAATCACTAGCAAACAAATACAGCACTACA  
ACAGCTGTAAAAGCTATGACCCAAAATTGTTCAATTGATAAGGTAAAACCTTATCATGCAGGCAGGCACAT  
TCATAAATATGAATGATGCAGTCTCCAAATTTGTTAATAGCTGCACGGAGATAACAGGTCAAAGTAACAC  
TGTGCTGTATTATCGACGAGGTGCAAACAATAATAATAGAGGAGGCCGAGGTTATAATCGTGGCAGAAAT  
TACAACGACAACAATTATAGCCGAGGCGGTAACAATAATAACAATAATTACAATAACCGTGGAGGAAGA  
CGAGGCCAAAATAGAGGAAGAGGCCGAGGTAACCTCCAACCAAGGTTATAATAGTAAAAATGTGAGAATG  
GCGCAAAATCCGGAAAACCAAAAGAACCCTTTAGGAAACAACCAGTAAATGTAAAGGTTTATTCCATCA  
ATTACAGTCTTAATATATTTGTCATTTTTATAATCATTCAACTGAAAATAAACTCACATTCTTAATAGATA  
CTGGTGCAGATATCTCACTTTTAAAAATAAATTCAGACAATTTCAAAATTCAAGAAGAAAAAATTATAAA  
CATCCAAGGCATAGGCCAAGGTGTAATAAAATCTCAAGGAACAACCTTCAATAGAACTTCAATCCACAAAA

TATATTATTCCACACGAATTTTCATTTAGTAGATTCCGATTTTTCAATACCGTATGATGATTGATTTTATTAA  
AAAATTCAATTGTCAATTAGATTTCAAACCAAGTGAAGACTGGTTTATAATTAGACCTCAAAATTTAAATT  
ACCCAATTCATGTTCCGATAACATATAGTGCTGGCAACAATACAGTTCTCTTGCCAGCCAGATCCCAAGTA  
ATTCGAAAAATAGACATTAATACAGTAAATGATTATATATTTGTTTCTAATCAAGAAATACATAATGGAA  
TTTATGTTGCAAATACAATAGCAGCATAAAAACATGTATACATTCGCCTTCTAAACACAACATAATTTTCGAC  
CAATTGGTCAAAGTAAACAAAATCCAATATGAAAATTTAACAGATTACGACATTCATAGCACTAATCCAG  
AAAATAGAAGCGAACAAGTACTTTCAAATTTAAAGAAAAATTTTCCAGAACAATTCAAAAAGTCAACTAAC  
AGAATTATGCACCAAGTATAGTGATGTGTTTCGGACTCGAAACCGAACCAATAGCGACAAATAATTTCTAT  
AAACAAACATTAAGACTTAAAGATGATGAACCCATTTATATTAAAAACTACAGAAGCCCGCATAGCCACG  
TCGAAGAAATTCAAAAACAAGTAGGGAAATTAATAAACGACAAAATTCGTAGAACCGTCTGTATCCGAGT  
ATAACAGCCCACTCTTGTTAGTTCCGAAAATATCATTACCAAATTCGGAAGAAAAGAAATGGCGATTAGT  
AATTGACTATCGCCAAATCAACAAAAAACTACTTTCTGATAAATTCCCGCTCCCCAGAATTGATGATATTC  
TAGACCAACTGGGCAGAGCTAAATACTTTTCATGCCTTGACTTAATGTCAGGTTTCCACCAAATTGAACTT  
GAAGAAAATTCAAGAAATATAACATCTTTTCAACGAGCAATGGCTCATATCGCTTCACGCGATTACCATT  
TGGTCTTAAATAGCACCAAATTCATTTTCAGAGAATGATGACTATAGCATTCTCGGGTTTAGAACCCCTCCC  
AGGCATTCCTTTATATGGATGACTTAATGGTGATAGGATGTTCCGAAAAACACATGATTAAAAACTTAACT  
GATGTTTTTAATGTANGTAGGAAATATAACCTAAAGTTGCATCCAGAAAAATGTTTCATTTTTTCATGCATGA  
AGTGACATTTTTAGGTCACAAATGCACTGATAAAGGAGTATTGCCAGATGACAAGAAGTTTGACGTCATC  
AAAAATTATCCGTCCCCACGATGCGGACAGCGCGAGACGATTTGTAGCATTCTGCAATTATTATCGTCGAT  
TTATAAAAAAATTCGCCGATTATTCACGGCACATAACTAGATTATGTAAAAAGAATGTTCCTTTTGAATGG  
TCAAGTGAATGCCAAAACGCATTCCAATACCTTAAAGAAAAGCTTATACACCCACATTATTACAATATC  
CTGATTTTTCGCAAAGAATTTTGCATTATAACAGATGCCAGTAAACAAGCTTGCGGAGCGGTTCTAACTCAG  
AACCGTGACGGAATTCAGCTCCCAATAGCTTATGCATCTCGTTCATTTACAAAAGGGGAAAGCAATAAGA  
GCACAACAGAACAAGAGTTAGCGGCAATTCATTGGGCAATTACCCATTTTAGACCATATATTTATGGCAA  
ACATTTTACTATTAAACGGATCACAGACCATTGACATATCTTTTTTCTATGACTAATCCCAGTTCNAAATT  
AACTCGCATGCGGCTAGAGCTTGAAGAATACGACTTCACAGTAGAATACCTAAAGGGGAAAGATAATTTTC  
GTAGCAGACGCACTTTTCGCGTATTAATATAAAAGAACTCAAAGATATGCAACATAAAGTCCTGAAAGTCA  
CTACCAGGCGACAAAGTAGACAAAATAAAAACTGTACAGTAGAAAATTATGAACGTCTGCCAAGGCGAA  
GTCAAAAAAATGTATCTAAGCCCAACGTACATGAAGTCATTACAAATGATGAAGTACGAAAAGTAGTGAC  
CTTGCGCATAACAGAATCTAAATGTTTATTTAAACATGGAAATAAAATTATCGCAAGAATTGAAGTTAGC  
GATTTATATACTAATGGAATTCTCGACCTAGGTGAGTTCTTCCAAAGGCTCGAAAAAGAGGCCGGTATATT  
AAAAATCAGCCAACTCAAAGTGGCACCGAGCGAAAAGATCTTTGAATCAGTTTCAATAGATTCTTTTNAA  
AATATGGGCAATGAAATATTAATAATCTTTAAGAGTAGCGCTACTCCAGCCGGTGACCCAAATAAAAGATG  
AAAAAGAGATACAACAAATATTGTCTACATACCATGACGACCCAATTCAAGGAGGTCATAGCGGCATAAC  
AAGAACGTTAGCGAAAATAAAAAGACACTACTACTGGAAAAATATGACACGTCATATAAAAGAGTACGT  
ACGTAGATGTCAAAAATGCCAAATGTCNAAAACAAAGACGCACACAAAAAATCCTCTGACTCTCACAGA  
AACACCTGTGAATGCTTTCGATATAGTGATAGTGATACAGTTGGTCCGCTACCCAAATCGGAAAATGGT  
AATGAATACATAGTCACATTAATATGCGACCTTACAAAATATTTAGTAGCCATTCCAATAAAAAGCAAAA  
GCGCAAATAATGTCGCAAAAGCTATATTCGAAAATTTTCACTCAAGTTTGGTCCAATGAAGACGTTTCATC  
TCGGACATGGGAACAGAGTATAAAAAACCAGATTTTAACTGATTTATGCAAGTATTTGAAGATCAAGAATC  
TCACCTCTACTGCATATCATCATCAAACATTAGGGACAATAGAACGAAGTCNTCGAACTTTTAATGAATAC  
ATTCGTTTCATACATCTCTGCAGACAAATCTGATTGGGATGTCTGGGTTCAATATTTCACTTATTGCTTCAAC  
ACGACACCATCAGCAACGCATGAGTATTGTCCATACGAAGTAGTATTTGGCAGACTACCGAAACAGTTCA  
TAGACTTAAACAAAATAATTACATAGATCCTATTTATAATTTAGATGACTATTCTAAGGAAATAAAGCTT  
AGATTAGAAATAGCATACAAAAGAGCTAGAATTATGTTAGAAAAAGCCAAGGCTTATAGGAAATTAGCA  
TATGACGAAAAAACAAAAAATTTGAATTAAGTAGGAGATAAAGTACTTATAAGAAACGAAACAGGG  
CACAAATTAGACCCAGTATATTTAGGACCATATATAGTAGAGAAAATAGAAGATAATGACAACATTTTTTA  
TTAAAGATAGTAAAGATAAAAAACAAAAAGTTTCATAAGAATAGATTAAAAATTTTTAATTCTTAATAA  
>9\_rnd-5\_family-816\_\_LINE\_\_I-Jockey  
GTCGCTAATCTGCTCTCATCGAGATCGGTTGTGCCGCGCATAGACAAAGTACGAGTTGATCAATTGTGCAA  
TCTACGTGTGCTAAAAATAGCACAAATCGAAAATTTTCGGACGCTGTCTTGTGCAGTGTGCGCAGTTTGACA  
ACAACAAAACGCAAGTGTAGTGCGATAAGACTGCATTCGTTGCCCGTTTGGGCAAAACATTACCCCTCTC  
TCCGCGCGCAGCCGNACAAGAGGGGCAATAAACGCCGCGCTTATCAGCTAAGTTTTCTGTTTATAAGCTT  
AACTTTAACTTTAAAGTTAACAAATATAAACTAAATTAATATGGATAAGAACCTTTTTTCTAACTCTCAGC

TTAGTAATAAGCCGACTGATTATGGAAAAAATGCGCCAAGTAGCTGGAAAAATCACCATTGGAGATCAGGA  
CAGATTTTTATTAGTACTGATACTCAGAGCATCAGCACAATAACAACAACCTTTAACATTTACTAGTGCCAC  
TAGTAATTCTATTTACACCACGGCAACTGCTGCAACCAGCAGTGTGAGCCATAGCGGAAGCATGGATAAC  
CATGCAGCTAGCTTTACCCAATGCNCNTCAGACATTACCTCTCCAACAATCAGTGGAGCTTCTAAAATAGA  
CTCCTTAGTTCTTAGTGAAGCTGCTACAAAAATTGGTGGCAGCCCAAAAAGAATTTGAAAAATAAGAGGA  
AGAAACCATTATCTCCCAATACTAGCTCTAAGAGGCCGAATAAAGATTTGAAGCTAGTCTCGCCCCCTCAG  
CATCAACAAGTATGGCAATCTCTGGCAACAGGTTTGCCTTGCTAGACATGGACATGGACATGGAGGTAAC  
AAACGAAAGCCATGTTGAAAGTTACAGAGCTCCAAATGAAAGCCCTACTAGCGCTTCTGAGGCTGATCAG  
CAGAACAATACTAACGTCAGTATTGATGTAAGTGACACAGCCAACAACCCACACAACATAACGCAACCA  
ATACCAACGACCAGCTTCACGGTACCCCAAAGCCACCGCAAATAGTTGTGTGTTACTGACCTTAATGATCT  
CTTTGAACTCATTATGGAGGTCAGTGTAGATAACGTGGCAGTGAAAGTCAACCAAGGAGAAACGGCC  
AGAATATTTCCCAAAGACAGTGACACTTACAGAGCAATTGTCAANCATTTTGATGGTATTGGTATTGAGTT  
CCATACCTATCAATTGAAGGAAGAGAAACCATAACAGGATAGTAGTTAAGGGGCTTCACCATAGCACTTTA  
AACAAACGAAATTATTGACAATTTAAAAAAAATGGCTTTGATGCTCTGCAGGTACATAACCCAAGACCAA  
GGAGTAAACAAAGATGGAAAAACTCAATATATTTTTATTAAATATAAGGCCATGCGCAAAAATTAATGATA  
TATATGATATCAAAACTCTTTGCCGACAAAAAGTGAGGATAGAAAGGATGCGCAAAACATCTGAAATCGC  
CCAATGCACACGATGTCAGGAATACGGACACACAGCCAAATACTGCCGTGTCATCCCAATTGTGCACGA  
TGTGGTGAAGATCATCTCACCAAGCTATGCGCACGTCCCCATGATGAACAGCCTTCCTGTTTGCAGTGTGG  
AGGGAATCATATGGCAAGCTACAAAGGTTGCCAATGGTACCAGGACTATCTACGACGATCAATGGGCTCT  
TCAATGAAGCAACAGGCTCACACGCAACCGTCTAGACAGATCAGGAGGAATCAAGATCGACCAAAGCAG  
AAACAACCACAAAGGAAACAGCAGCAGCAACCAACTCGACAGCAACAAATACCTAACATTCCTAGAGTC  
AATACCGGAGGCAAGTCCTATGCCTCAATAGCAAGGAACGGCAACGAACCTGCCAGCGCCGTCTACATG  
GTTTGCAAGCGCAACAACAGCTACTNAAGCCAATAGAAAATATCAGGCAGCAGCAGCATCCAGCTGACG  
TTCAATCATTATTGGAACAACAGCAACAGCAATTTAAACAACAGCTGCAACTACAGCAGCAGCAGCAATT  
CCTCTTGTGGCTTCAGGAGCAGCAACGGGAACAACAACAACAAAGCAAAATAGTNAACGACTAGA  
ACGGCTGGAAAAAATGGTCCATGAAATGGCCAGCATGATAAAGCAATGGACAGGGGATAGATCGACTCC  
CCAGCTTCATAGCAACGCCTCAGCCTCCCAATGAACCCACTCAAGATCCTTATCTGGAATGTTAATGGCAT  
CGCAGGAAAAGCCAGTGAAGTTGAGCTCTTCGCGCACAACAACATGTGACATTCTCCTTCTAAGTGAG  
ATCAGACTAAACCGAGGAGAAACAGTCAAAATACACGGGTACACCTTCTATCCAGCTTACAAGCCATCAC  
GTCACAGTCACGGTGTGCGGAGGAGCGGCGGTATTCGTGAGGAGTACTCTCCGCCATTTTCCACAAAGAGT  
AATTGAAACGAGCACCATACAAATGTCTTCAATAAAAGTTGCCACAGGTTTGGGAGACATGGAATATAGC  
GCCATATACTGCCCAACAGAAATAGAATTGAAGAAAGGCATTTAGTGACATACTCGCTTCTTGCGGCC  
AAAGGTATCTGGTTGGTGGAGACTGGAATGCGCGACATTGGCTGTGGGGAGATACCTACAATTCACCCAG  
GGGCCGAGAACTAGCCGAAGCCATTACAGCCAGAGGAGCTAATATTCTCGCAACAGGATCACCAACTAG  
ATACCCATATGTGTCTAGTCACACACCTAGTTGCATTGATTTGCGATTATACCATGGGATACCGGATTCTC  
AAACAAATATCGGCCAAAGCTGGGATCTAGACTCTGACCATATAGCCCTTGTTGTAAATTTGCAAACGGA  
TGGTTCTTATGTCAGGCCAAACCCTCGATTAATTACCAACCGTACTGACATCATGGCTTTCAGACAACATC  
TTGAATGCTCGNTTCAATTAAATCCGACCTTGGACTCTGGAGTAGACATTGAGAATGCAGTAGATTTTCTA  
ACTGAAAATATACATAGCGCTGCTGCTGCCACAACCTCCACCCATCACCGAGTCACGTCCCATTCTGTTATGG  
CATTGTTCTCACGAGGGAGGCTAAGGAGCTGATCAGAACAAGAGGTGCCTTCGAAGAAGAGCAACGCG  
ATCACAAGATCCTTGGGACCGAATTTTGTGGAACCGAGCAGCAAAACAGCTACGTAACCTCCTAAGGGAA  
CTCAGAAGTGATTTCTTCGAGCAAAAACCTGGCTTCCATGGACTACACCGTTGATGCGAACTACTCTCTACG  
GAAATGTACAAAATCACTCAAACGACAACCCTTTAGACAGGTACCTGTCCGATGTCCTGGTGGCGAACTT  
GCNAAAAACGAAGGGGAACAGGCTAATGCTTTTCGGATATCATCTTGAGGCTCGTTTCACTCCTTATGAATT  
TGCTACGATAGAGCAGACCAGGGAGACCCATCAGACTCTGCAGACCCCCTGCAGATGTCCCTGCCTATTG  
AGCCTATAAGGATTGAAGAAATAACTGACGCGATCCAGCTATTGCCAAAAATAAAGCTCCGGGTATCGAT  
AGGATCTGTAATGCTACGCTGGAAAGCCCTGCCTACAAGAGCGCTTCTGTATATAGTGCTAATTTNTAATG  
CTATTATCCGGCTCCAAGTGTTCCCAAAGCAATGGAACTAGCAGCGATTATGATGATTCACAAGCCAGG  
CAAACCAGAAGCTGATCCTGAGTCGTATCGGCCAATAAGTCTCTTACCCTCCCTGTCTAAACTATGGGAGA  
GGACTATTGCCAATCGGATTACTGCCATTACAAGCCAATGCAATATCTTGCCGGATCACCAATTCGGATTT  
CGAGAGGGACACGGCACTGTGGAACAGGTCCACAGATTNGTGAAGCACATCATGCAGGCTTTTGACGACC  
TAGAGTTCTCAAACGCTGTCTTCATTGACATGCAGCAAGCGTTCGATAAGGTGTGGCACGATGGATTACTG  
TGCAAAAATAAAAACCTTTTACCTGCACCGTACTATGGCCTTTTAAGGTCATATCTGGAAGTACGAGAGTTC  
AAGGTCAAGGTAAGGGACACATACTCGTCCACCTATACTATGAGAGCAGGAGTGCCACAGGGCGGTGTTT

TTGGTCCGCTGCTNCTACTCGTTGTATACCTCAGATATACCCAGCCCTACCTCTCAACATATGGANGATCCC  
TCTAAGGCTATTATTGCG  
>9\_rnd-5\_family-2112\_\_Unknown  
GGAGGTTGCCGGATCTTAGAGTGCAGGACGGACTTCTGTTCAAGAGGACCGTGAACGAGAGCTTGGAGG  
ATGAGGTCGAAGGCACAAGTTAGAAGCTCTGGGTGCCGGAGTCGCTGACTGCAGGACTCATCCAACAAGC  
ACACGCGGACGAGACGTCAGCTCAGGCGCTGCACGCGCTGCGCAGGCGATATTATTGGCCCAACATGGCC  
ATACAAGTCAGGGACTATGTACGGAAATGCGATACATGCAAGGAGACCAANGCACAACAACTACCGGACG  
CAGGTCGGAATTGGGGAAGAAGTGCGCACCGACCGCCCTTCCAGAAGCTATATATCGACTTCTTGGGGA  
AGTATCCACGGTCGAAACGAGGGCATGCGTGGATATTCGTCGTCGTAGACCCTTCTCGAAATTTACCTTC  
CTGAAGGCCATGAGGGAAGCCACCGCGGCGGATGTCGTGAACCTCCTAGCGCATGAGGTGTTCTTCAAAT  
TTGGCGTGCCGGAAGTGATCCATTTCGGATAATGGACGACAATTCGTGTCAAAGTCGTTTCGATGCGATGGT  
CCGGCGTTTGGCATTACTCACCTGCGCACACCAGTGTATTCGCCTCAGAGCAACGCCGCCGAACGCGTGA  
ACCGCACAGTGCTGTCTNCAATCAGAACCTACCTGGGTCGGGATCATCGGGATTGGGACGCGTACCTACC  
AGAGGTGGAAGTGGCGATCCGGAATGCGGTCCACAGCGCTACNGGAGTGACTCCGTTCTTCGCGGTCTTT  
GGACAGCAGATGTACCTGAATGGTTCCAGTTACAACTGGCCAGGAAGCTGAGATCNTTGGCCGATCACG  
GTATTTCTGACCTTGACGCGAAGGACAGACTGGCTGTAATCCGAAGCCAAGTCAAGGACCACCTGCACAC  
CGCATACGAGCGAAGTCGCCAACGATACGACCACCGCGCGCGCCAGCTCCATCTGGAACCGGGACAGGA  
AGTGTGGAGGCGCAACTTCGCACTAAGCAGCTTCGGCAAAGCCTTCAATGCCAAGTTCGCCCCGGAATTC  
TTGAAGAGCCGAGTCGTCCGAGCCGTGNGCACCAACGCCTACGAGTTAGAAGATCTCCAGGGACGCGCGC  
TAGGCGTCTTCCACGCAAAAGATATACGAACATAATCGTAATTTNCTCACCTCCCTGCCAGGCAATGGCG  
GCGGCAGCGCCCGTCTCTCCCTTTTTTCTTTTGGGTCAGTGCGAAAATATAGATTACTTGTCGTGGGTGTGG  
CCTACGTTGGGCATCGTTATTAGCCGGCTTGGTCAATCCATGAAATGCGCACGGAGATTCCTTGTAACGGT  
CATTCATGTCGTTACAATAATCTGCGTGGTGATGTTGCATTTGACGTTATCGGCAGCACCGAGGGTTTACT  
TAGTTGGTTGCGTGCGATATTATCGGCCACGCCGATATCTTTTGTATATGGTCAGAGTATGCGGGGTGAA  
GCTGGGCCCCACGGCGGAGCCCAAATTTTTGAAGGGTGGCAACGCCAGACTTGCGATCCACGGCGCCAAAA  
GCGACGATTGCTATCGGCCGCCAGTTCGCTCTTAAAGAGAATATGAGGAGAGTGGATCGCATGCCCTTG  
GATATGCCCTTGGCCGTCATTTGGGCCATTGACCCAAAAAATGCAGCTGTGCAGATGGGCAGCAACGGTG  
CCCGCCTCGCCAATGTATGCGTGTGCCGAAATTCGGCACCGATGATGTTGCTGCCCAAATGTACGGGGAG  
TTCGACTTTGTCAGCGGTCCACAGCGGACGTACCGGCTCACAGTTAAGAATTTTTTGGAAAGTTGGATATTTT  
TTTTGCCGGCCACGGAGCATGTGCTTAACCAAAAAGAAAAAATCAAAGGGCATAACATTTGTTTCATG  
ACGGGCTTTCTTTATTATTTAATTGCCAAGATAATTCCTTATGTGCTAACGTATTGCAAAAGAAATAGTGC  
ACAAGAGCGATAATACGCGAAACAATAATACACCAGAAACACACTGTCGTCATTTAAAACCACTATAAA  
AGCGATACTCTATTAGAGCAGCCGCAGCCATTCTGTGGCACACCACGCTTGAATCCCGCGCCGGAGGACG  
CTGGCCAGATCAACCCAGATATTCACGGGGCCGGATTTTCAAAGCGCGGCCAAGTGTCGGCGTAATCCACG  
CGACGGAGAGACGAGCCATCACGGACGGGACTCACACGACGAAGAGGCGGCCACGGGCGAGACCACGC  
CCATATCATCCGAGTGAGTCTGTTCCATTTTCGTGCCTCCTCGCCTGAGTAAACGGCAGAGTCAGACGCAGA  
CTTCCCATTGTGCTCCCTGAAAGAGAACCGATTTTTTGNAAATTTTAACTCCAGTTTTTTTTTGCTATTAAAT  
ACANAAAAATACTCACGACTAGTTTAAATTAAGTAAATTTCCGAAAGTGCGAACCGGGAAGGAAAGGGC  
CCAAAGATTATTGCGTCTGCCAAGTAAAGAATGAAATTAAGAAAGTTTAGATTTTGGTCAACTTATGCACG  
AGTGATACCCACTTATGCGTATATATATATATATATACGTACCTCAGGTGCAGGTGCCCCCCACCCAGA  
GAGCTCTTTAGGCAGGCAAGGTAATATAGCGCTTTGACAAACAACGCCTTTCGTTGGAAACACATATGTA  
TACACGCATTTATTTTAGCGGGTACTTGCTCCCCATTGGTGCAATAATTACCTGTGTTTATATTTCTCCCT  
TGTTTTCTTTCTTTGTTGACTGGCAATAACTTCTGGCCGTTTTTTTTTGGTCTCCGGTATCGTACGAAGGTC  
GCCAACAGAAAAAGATATTCTGTACAAAAAAGGAAATTTAATATATTTAAGATTAATAGAAATTGTTA  
CAAATATGAAATGATGCAACGCGTTATAGATAACCGTTGAAGCGAAGTTGAAAGANGGAAAAAATTGA  
AATTTAAACTTATATCCATTATTTTAAATATAAGAATATACCAACTTATCGTATGCACCTGGTTTAAAT  
GCCGGAATGTTTCGCGAGTACGAAATTATAAATAACGGCTTGAAGATAACCTGCAGGGGAATAAGAAAT  
AAGATTAAATGTTAATAACGATAAGAAATGCAACCAATTATATACCGTATCTGAAGAGAGAAATGTCCGG  
CTAAATTTTCTTTGATGGGGAGAGTTGGCATAACAGCCGGCACAGGCTGATGGCCATCTAATGGCAGAN  
GTGGGAGACGAGTAGGTGATCGTCTCATGGTTGGGCGGGTACGCTGGGTCCGGAACCGGGGGCCCGATCTG  
GAAGAGTAAGGTGGATAAATAGTGTTTTTGTTAATTTATATCGAGCGTCTCACCTTTGTTGTTTACATGTTT  
ATAGCTGTCACAGCTGTTTATTTTGTTCATGAGTTAGAAGTTCCGATTGTTTGACGTTATCGATTGTGGTT  
CGCTTTGCATAGTGTGTGTAAAGTCTGTTTTGCTACAGACGTGTAGCTTCGTTGTTATCGATTGTGCGGACT  
GCGGGCCAGGGATGGGACTACACCCAGAGAAACCGATGAGCCAGCCGGCGCGGCCACCGAGAAACAAG

CAGTTCCGTAACAATATGGCGCCCAATTTTTGAAAAGGGCACTCGGCTTCTTTGAAGTCGGTGCGTACATCA  
AAGATAAAAATAATANGATATNAATGAAGGTACAGAGAAAAGGACTCCTTTGGCTTCAGGACCCACACC  
GCTGAAGTCTTATGTGGCACGAGTNGGTAGCCCATAATCGCGCGGCGTGTAGTGGAATCCGAGAAGCACG  
ACGGAAGTAGAATTATCAGAATATCCATAAACATGAGAAGTTTTCTTGTAAGTGGTTGATGGCGGTAAGTC  
ACGTTTCGCATGTTGGCGAAACGTTTCGCGACCGTTCATCGTTAGCCTGGTGGTAGCCGCCACGACAAAGGC  
ANCTCGTGATAAGAATGTGATATTAGGGTAGGTCGTNCTAGAGTTTTGTTTAATGTNTTTCATATTTGTTTTGT  
TGGTCCCACTCTGTGCTAACGCTTGGGGTGTGCTGGCCGTNGNTAAANGAGCTTCGGAGACAGGTGACCC  
AGGACGATGTAAAGCCGATCCTGCGCCGCACCTGTCGCACAGCATAACCCCAAGGGTGCCCAAGAGTGCGA  
CAGAAACCAAATAGCCTTCAAGGTAGCGTTCCTTGAATGCCGTCGTCAGCCAANCNGACGAACTGAGCA  
TTTGACGAATG  
>Ref\_dvir\_1031  
TAGTTATATTGGGCATTTAAAAAGGTAACGGTTGAAATCGCCAATTTGGTATCTGAATCGTCAGATCGAAT  
TGGAGTTACGGGTCCCGTGTGTAAGGATATCATTTTAGACTTTTGCCATTGGAAGAAGGGGCTGGAGGCGG  
CTCTTTCAAAGGAGGGTTTCTTTTTTAAACGATTCTCGTTCCTTTAGAACTGAGCTAGTGCGATAGATCTTGA  
ATGTCCTAAGTCTATGTGATTAGGTTCTTGGAAGGTAGGGTGACTACATATCTGCCATTCTCGTTCCTTGT  
TGTGTTCGGATGAAATTACTCTCACAAAAAGAGTCGGAGCTCTTTACCAGTTTGACTGGAATGTCCTCCA  
CCTCCCAAAATTTTGTGAGAATGACGTCTAATTGCTCTTCTTGAGAGACAGATATTCGAGTCGAGAATGAC  
GAGATTGCGGTGGATGCGGTCTTTGAAACTGGGCCTGTTAAAATCCACCCGAAAATAGTTTCCTGGCCCA  
GCAACGTGCCACATATATTAGGATGGGAGCCGCCCGTTAGTATGGACGGTAGGATATCAGCGCCAATCAG  
CACATCTATCTGCGAACTCTTGTGGAATTAGGGTCCGCTAACTGGAGTTTTGGCAGGGTTGTCAATAAAC  
TTTGGGGGATCGAACATGATGGTAGATTCCCTGCCAAATGTGGTAGGACGTAGGCTGATGCCTCGATTG  
GATACGAGGCTTGGAAAGGAGAGCCAATATTAATAATGGCAGAGCTTGCGAGGCTGGGCTGCAACAGCTTG  
ATTTAATCCCTTGTGCTGTACGGATTTGTACGGCAGCTTTATCAGGTGGAAGAGCGCTCGGAAATAAATGT  
TGCCTCTGATCCCGAGTCGATCAGTGCACGAGCTGTATAATTACACCCAAATGGCGAACATATATAACAG  
CCGTGCTTAGGAGAACACCGTGGGTGTTTAATTGCAACATAATTGTGAACATTCGTTTTGTGGGAAGGAA  
GTGGACTGTATGGATTGATTGGAGGGAGCGGTTGCGTATGGCATGGAGACTACTGTAGGGCTCAATTGTG  
GAGTGTCACACTACGATGCAAGAGCGTATTGTGACGACCCTTGACGTAACAAATTTGTGAGCACTTGTGCA  
ATCCCTTAACTGATGACCCCTAGCGAAACAGTTCAAACATAGTTTTTGTCTGTTTGATGTAAGTTGCCCGTT  
CGCTGACGGGCATTTGGAGAAATCGTGGGCACAGACGGATAGGGTGATTCTCCCTGGAGCACAATTTGCA  
GGCTTGCGGCTTGTAGCGACCTTATTCTCAAATGAGTTAAGTTTTCTGGAGTGCGCTGGAGTATTTGCGCT  
TGGCTTAAGCTCTTCTATCGCTTCTAGAGTGCGATAGCGTTCTAAGAGAAAGGCGTTCATCTCAAGCCAAG  
ATGAGATGTCGTTTTTTCTGGAGATGGACTGTTCCCATAGGAGAGTGTTAATTTGGGTAATTTGGAGGAA  
CATAGGAACACGAGGATACAGTCCCAGTTTTCTATGTTGATTTTCGGATAACTCCAGAGCTGTTAAGCAACC  
TTGAATGGTGCTCTGAAGTTCCTTAATTGCCGTTCCAGACTCTTGGGAGATTGGCTGCAGGTTGAAAAGAA  
TCTTGAGCTGGCTGTTGACTAACAATTTTCGGTTCTCAAAACGCTCAGTCAGATTGGCCCAGGCTGATCGG  
AAGCCATCGTTAGTCAAAGGTGACTTCGATACAATCGCCTGAGCCTCACCGCTGGTTTTTCGCATTGAGATG  
GAATAATTTCTCGACCTCTGATAACCTAGGATTATTTATGTAAATTGCGGTAAAGAGGTCTCGAAATGTGG  
GCCAACGTATGTAATCTCCGCTGAAGATTTCTGTGTGCAAGGAGGTAAGCGACACCCTGTGGGAACATA  
TGTCGGAATGGTGGACTGAGCGGATGGTCTATTTTGGGCGTTAGCGGTATCGATTTGCTCGCTAAGTTTAG  
CGCGCATCTCATATAACCATGTAACAATAGTCGTACTTGGACTGCATAACTGAAATGGTTTCCATTGAACCG  
GCTTCCGAGATTATTGTTGAGCCGACCTCGTACTCTTTTTCAACCTTGTCCACAAGGGTCGCACTTGGTCCC  
GACGGACCTGGCACGTATAGAGAGACGGGTCAGAGCCTTCAGGTAATGTTTTTTTTTTTCCCTCAAACCTGA  
CTTAGCCTATCAGTGACAGCAATAAACTTGATTAAGGCCGCGTCTGTCATATTTTGGGCCGTTTTTGGTATT  
AGCTCGCGTGGAATTCGGACTAGATCTTGTGCTAATGGTTGCCTTAGTGCGTCCGACTGCAGTGGTCAGG  
GATGCTTCGCTTTTAGCTTTGGACGGCGGGCGACTGATTTTTATCAGTGGACTTGGCCTCGAACTAAGAGG  
TGCCTTAACAGTTCCCTTGGCGTGGACGCGGATGATTCGCTTTTAGTCCGGGACGATGTTTCCCTTTCGA  
CTCTAAGGGCTGCTGTTGGAGACGGAGAAGTTCTGGAGGTGCTTGCGGACGGAAGTCTAATTGATGCTT  
TGTTTTCTTCCCTTTGCCAGTTGGCATACTAGGCGGAAGCGCTTGGGTAGGAAAACAAAGGTGCTCGTTTC  
TAGTAGTAGAGGTTGCGATGCTTAAACAAAGAAACACTGGAATGCCGGTACAGGTAAATAATCGAGTTT  
ATAATTCGATTGAGATTGCGGAAGATTTAAATAATTTTGCTTAAATCAAAATTTATTTGATTTAATTAAT  
TTAATTAATAAATTTATTTGACTTGGTAATTTAAAAAAAATACGATTATTTATTAACACGGGAAATAATA  
ATAAAGAATTCGATGCTCGTTTTTCGATAATTTTATTATTATATTAGTCTTTGAATACGGTAACGGTTGGTTT  
ATTTTTACTTTTTTGTGGTACTCATAAAATACCCACTATTGTGGCTGAGTACACACCGCTGACAAATGTAG  
AACTTCGAAGTTAATGTGTAGTGTTTTTGTTTATTTACAATAAATTAGTAGTATTATTAATCTATTAATTAT

GATTGTTGTGTTTTATTTGGTGCGTCTCGGAACAAGAGTAATTGTATGGGAATGTGTGCAATTGCATAAA  
AACGTGTAATTGGAGTTCGGATCGGCAGCTGTGGTTTTTACATATATGTGTGTGGTGTGTACATACGCACA  
TACGCCGGTTGAAATTGCAATTTATTACTATAATATTGCTGTGTTATAATATTGCTGTGGATTGTGCACTAA  
AAAATATTATATGTGGACACACATAGTACATATGATTTGTGGATTTATTTATCGGATGTATGTACTATGTG  
GTTGCACAAATATATTCGTTTGCCTATGCACAATTATAAGTTAAGAACTGAATTTGGGTTTGTGTTTAT  
TTAATAAAGTAAAACACAGTGAATAAATTATAAGTTAAGAGAATGAATTGGAGTTTGTGTTTATGTTTAT  
TAAATAAAAAGGTTAAATATACCTGGTGTATGTTTGTGTGTGCGGACCAAGAACATGAATTAACATATTAA  
TTAGGAAACAATATTGTGAAGCAACTTGTGCGATTAAAGTGCAGGACACGTAATTTTTTTATAGTTAGGAAA  
GTGCACGAGTGCCTACGTATGTACATACAAAAAATGTTGAAGTGGATTTCTTTTGTAGTTGGAAGTAACTA  
ACACAAAATTTAACTAACTGTTTTTAGTTTTGTGGTTCGGATAATTTATATATATTTTATATATATATAATA  
TAGAAAATTGCCAATCAGTTTTCTTAAAGAAAAAAATAGGCGGAAAAATATGGCGGATATTGCCGAATAT  
ATATAGAAAGGAAATTTTGTATTTACTTATCTTTGCCAAAAAACTTGTGTAGGGGCGATCGGTTTATATAT  
AATCCGGCTCGAAGGACCAATGTTTGTGGGGCGTCAGATAAATAATCCTTGATTGTTATTGGTGAACACT  
TTATTAGAATTTTCTGCTGCATGTAACAACTCTGCTGGTTAAGTGATTTTACATATTTTGGTTGGAGTGA  
TGGAGGTGGAAGGAGACCACAAGGAGAGTGCTGAGCGCATCTGGGATCGAATTAGTGAGTGAGTCTCT  
CTCAGTGAGTGAGTCTGTCTCACTGAGTGACTCTCTCACACTGAGTGAGGCTCAGTCAATGCTGTGTTTAC  
ACTAGCACTGAACTGGCATGAACAATGAACA

>Ref\_dvir\_316

CCCCCACAGCACAGGCCAACAGCATTATGCCGAAGGAAATCGCCAATGTGTTTCCGATTGCGATACTGTC  
TCTAACCTCCTTGATGTTGGTTAAGGTTGTTTTCTCAGGCGGTGAATGTAGGGAAGGCTGAGTATCGTGT  
CATGGCCGCTGATGTTAAGCAACGGTGTATGCCGCTACCACCGGGAACCGATTTTGCACGCTCTTGCGATTG  
AAGTAGTTTGTCCCATCTATCTTCACGCAGTGAATCGTCGTAGGTGAGTATTGCGCTACGATGTTAATGA  
CGATGATGCCGTCGTCCACTATGGTGACAGGGGCAAGATGACTCGGCTGCGTTTGGCAATGGGCTGTACC  
CCCTGCATGGAGGCCTTGTGCGCAACTGATGCTCTTGGAACGCTTGCAGAATGTGGCAGTCGCAGTTTGTG  
AGCAATTGGCTACGGCCAACATCTGTCCGTCGCAATCGGCCACAAGATTGTCGTGGAGTTGGAGCACAGA  
ACCGTTGTGGGCGACTGGGAAAATTGTTATCTTCCTGCATTGCTTACTTATTATAGGGAATTCGATTATCA  
AACTTATTACATTATCTCTACCTTAATATTAGATACTTTCAATATGTGAGTGATAGGGGTCCCTGTGATTG  
GTCAGTGAGAATATTCATAAGATCAGAATGATCTATTATTGTTGGGTTTATTACGTATAATTTTTTCTAGG  
GTTAAAGTAAGCATAAGGTTCCCTATTTCTGTTATTATCATTCTATTGCGTGTGCTTAAGGTTTCAAAAAG  
GTGGCCAGTGTGCGCCTGCTTATCTTTTGAGGAATTAAGAATTTTGTTTACAGTGTCGGTCAGTTGGTTAA  
TCTTTTCTTGTACTTTGGAATTTATAGAAATCTGCCTATTGCTTGCAGTGACCAGCTGCGTCTGCGTTAGTT  
CTATTTTCTGAAGTCGTTTGCCTCCGAGTGCCCGCTACAACCTTAAGGGCTGTTCCCAAGAAGTCAAGG  
CTTCTTACCTTGCGATGGTGCACATCGAGAGCGGACAACATGTCCAGTGTCAATTTCCAGCAATTTCTCTCA  
TATGGGATTGTGGAACATTCCCGTCAGCTTCATGGTCTCCTCAGTCATTGTCCTATAGTCCGTGAGATTG  
GTAGTGTGACGTAAGTATCCGTAACCTGTCCCAAAGTAGAATGTCCCGTCCATAATCGGTATGTAGTCCGC  
GTGCGAGTAGTCCGTCACCCGAGCCGTTGTCATGGACATGATTGAAAGTATGGTGAACGTAATCCTAAAA  
TGTTGAAACTACTGTTATCGGAATGGTAATGAAAAAACTGTGCTTCAATTCAACGGAGGTTGTCCTTGT  
GGACCACCCTCCCCCAATGAGGACCGTTGTCCCAAGTCCGCTTCAACCTTTTTTTCAATGCACAAAGGC  
GATAGCTTGTGCTAGTCTGCGGTTTCGTCTTTACCAGGACCTTTTCTCCTACCTCGAAGACTCTGTTCCGA  
CGCATTTTATTAACCCTAGCGTTCTGCTGGATTGCGGCCCTTTCTAACCTCGTGGGTGGATTCCGGAAGCG  
AGTCAAGCAGGATGTCCTTAGGCTTCTTCTCAACCACTGAGTGAAAGCGCTCTACCTGACCATTGGACGTG  
CTATGAAGGGAAGGCGCATTTACCACGCTTACGCCGTAGTTATTCAATAGCAGAGACCTGATAGTACTTG  
AATGCGAGCTCATTGTCGCAATACACTTGCTTAGCCGAAGGGGAAATATTCAATTACCAGCAGAGGTGGTC  
TCGTGTCTTCTATCGTTTCGAGATGCGATAGGCTGGACTACCGCAAACCTTCGAGAACTTGTCAACACAAGTA  
AGGAAGAACTTTTGTCCGTGGAGAAAATGTCAATGTGAACATTTCTCCAGTCTGTGAGGGAAGGGCGTC  
GGCCGAGTTCTGCTTCTTTGGGTGTCTGTGCTATTTTGTCTTTCGTGCAAATTCTACAGTTAAGCACCACTT  
CATTAGCTAATTTGGTCAATTTTAGGGAAATAGTACTCCGTCATGACCTGTTTTACATTCTCCTGAGCCGCCC  
TATGGGCTCGATTGTGTTCCCTAGTGATGATTTCTCTTCTATCACTGACGTCGAACACGTCGGCCACGAAG  
TTTTTGCAATACCAAACTTCGTAGTCGGAAGGCTCTTACCAACTCGTGCTGGAACTGGCCAAGATTGG  
GAGAGTACAGTGAAACGCATTAACCACGTTTGGGTAAATGATGGCCTTTATCGTTTCGATGAGGGCGACC  
GTATCGGTAAAGTTTATCAAATGGCGGGTTTTTCGCCGAAAGTATGAAATTTCTTTTTAAAGGAAAGCGA  
GATTCCTCTAATAACAACCTGGTTTCGGAAGCAGTTTAAGGGCTTCTCCGTCGAATCGATTGTGTAAGACAG  
GGACAATTCAGTGTGAATCGTGGCCGCGTCAGATTCTGGTTTCATCGCGGCTACCCTGCAGGGCGTTACGTC  
TCTGGCGCGACAGCGCGTCCGCTACAAGCTTGGCCCCCTGTTTCATCAATGCGCGCTTCCAGCGCTTTATT



TTTGCATTGGGATTGCTCTCGATACCGAGAACGTAAGAGGGCTGGTGGTCAGTGAAAATGTTTATGTCCCTA  
ACCCCGTAAAGGTGCCGTAACCTTACCCAATCCCCAAACGATGGCAAGAACTCCCGCTCGTTAGTAGGCG  
AAGTTTGCTTCCCTTATCTTTTAAGGACCGGAATATCATAATAATGGGGCGACTCATTTTGCGACAAGACA  
GCTACCTATGCCATAGGGCTGATAGCGTCTGTGAGCTAAGTCAAAAGGCTTTTTATAGTCCGGGTACAGTA  
TGACGTCTTCCGACGCTAATATGTTCCCTAAGCTTCTGGAACGCGTTGCGTTCATCGTTGAATTGTATAGGG  
ACCTTTCTAGACCTGTACTTGCTAATGGATCCGTTTTCCCTTTTCAGGATGTCGGAGATTGGTTTTCGCTATT  
GCTGCAAAATCTTTGATAAAGCAGCGGTAATAGCTTGCCAACCCCAAAAAGGATCTTACTTCAAACACCG  
TGGTCGGCTCAGCATATTCCCGAATGGCCTTTACCTTTTCTGGATCTGACTTTGCACCGTCTTTAGTCACTA  
TGAAGCCGAGGTACTCGACGCTTTCTTTAAAAAACTGTGACTTCTCGTGCGCCACGCGCATGTTTCGCATTT  
AAAAGGCTCCCTAATACCCAGTCGACATGTCTGACATGGTCCGACTCGTTTTCCGAAAAGACGATGACGT  
CATCTACATAAACGTAGCAAGATTTTCCAATCTGCTCCCGCAGGACGTCATCTATGGTTCTCTGAAAAATG  
CTTGCTGCATTCTTCAAACCGAAGGGAAGTCGACAGAATTCGTAATTCCTCCCGCCATTGATCGAAAAGGCCG  
TCTTCTCACGATCCTGCTCCGCCAGCGTAATCTGGTGATAACCTGACTTTAGGTTCGAGCGTCGTGAAGTAC  
TTGGCTTTACCCAGATTAGCCAGTATCATTGTGATTACTTGGCATTGGATATTTGTCGGCAACCGTCTTGA  
GGTTGAGCTTCCTAAAGGTCTATTACGAGACGTTTATTTCTATTGCCTACCTCGTCTGTGCCTTTCTTATCG  
ACCACCCACAGTGGATTGTTGTAGGGCGATTTTCGACTTTCTAATTATACCGTTTTTTTAGTAGTTTCGTTGACT  
TCTGAAACGACAAAAATCCTCTACACCCCTAGGGTAGGGGTATAGCTTTGAGTAGACCACATTTTCGTCGGT  
CGTACGGATCGTGGCCACAACAGCCGTGTTATAAGGCAGCGCCTCGTTGGAGTCCGCAAAAGCCTTGTTG  
TTTCGATGAAGTACTCGCAGGAAATCTGCCTTCACCGCAGGTGGTGCCTCTACTTCCTTATTTTTCGTGTGA  
TTAACGCTCACACATTTGTGGTACTGCAACGCTTCCGAAGTCGCACCAAATATTAACATACCTTTTTTTAG  
GCATAAAACCGCTCCCACCTGCTTTAGCAGTCCAGCCCTAATTCCATCAAAAGTGGATAAAAAATCTAGTA  
GGAAAAATATGTGTCGCACCCAAGCATGGATAACTTGCATTTTTTCGGCGATGTTGTTGGACCCATGAATG  
GAGTGGAACACGAAAAGGGATCGACCCGAACGAGCACGAAGCCGTTTGCGCGCCGATGGATTTTTT  
>160\_rnd-5\_family-7852\_\_Unknown  
TGGGCAGTGCGTTGATCACCAATCAGTCAGTCAGTCAGTCAGTCAGTGAGGACAAACAGTTTTTATATATA  
GAGATAAAATAAATAAATTTTGACTCAATATTTAGTTAGATATTTTATTAATTCAATTTAGATTATTGCGC  
TTGCAACTCTATTCCAAAAAAGGCGCCAAGCTTTAAGAATATTGAATTCGTGTCAGCAACTTAACGAAAA  
ATTAGTGTGCATTTAAACCTAGTGTTATGTGCCAAAATTGCAAAAAATAAAATTCCAAAGCATAAATAC  
TTTTGGCGCAAATTTCCGGGTGCTAGTGTGTGCGGTTCTTTCAAGAGAATTCTGCATGCCACTTTTAGCCGTT  
GCTGCTGTTTGAATAATTGCCTCTTTTAAGGCTTTACTGAATTATTATATACCATTAATATTGTCAATTAT  
TTAATTAATTTATTACATATGTATATTGTATCTGTATATCAGTATATATTATAAATTGCAATATATATTGT  
ATATACTTATTAATATATATAATTTAGAGTATCTGGAGTATTTTAAGATTGGTGTAATAAATGTTTGTGCG  
ATGTAAACTTTTAGTTTTGCTACCATTTACATCCGAAAGTTTATAAAGCTGCATTGTATACATACATAAT  
GTATATGTGCAAATGTATATAACAGGTAAAAGGAAGCAACTCCGACCCCATAAAGTATATTATTCTTGAT  
CAGCATGAATAATCGAGTTGATGTAGCGAAGTCCGTCTGTTTCGTTTCGTTCCGTCAGTCCGTATATACA  
TACGAACGCAAGGATATTAGATCTATACAAGCTAGAAATTTGAAATTTGCTACGTAGGCCCTTCTAGTGCC  
CGAGCAGCACGTGTTTGTTCGGATAATCGATAAATTGTCCCGTTTCCAAGTAATCGATAAAAAATCAATAT  
CACAATCGTGTTTTTTTTTACCAAATTTAGTAAAAATTATGATCCAAGGCCACAAAATTTACATGTAGCTT  
CTAGAATAGAATATATACGAACAATGCCTTCTCAAAGCTTCTAAAATATTCTTTGGTAACGAAAATAACTT  
GGTGGCAGAAGAGCAACAAAAAAAGTTTAAATGCAGTTTTCTTTATTCATTCATTATTTTTACTTCACAAA  
AAAGATATTCAATATGTTTAATAGTATAAAAGTTATAAAGACAAAAAATTACACGTGTACTATTCTAGGA  
CTTAAGCTGCATACGATATGCTAAATAAGGTAACGGTAGTTTGTGAATGTTTATATGTATACATACATGTA  
CATACATATGCATTTTTTGGCACATCTTGGAAGCAAGTTTCTGAGATTTTTTTTTTAAATTTGCTTAATACGTG  
GTAAGATAGTGTTCAAAATGCCTAAAATTTATTTAAGCATTGGGGAAGGGCAGCTAATTTTAAATAGAA  
TATTCGTACAAGCTTAGATAACAGAGTTTCATAATAAATGTTTGTGCGACGCGCTGATCACTGGTAGCACT  
AAAGATAAGTCAAAATAAGTTAGTAGGTGTTGTAGATTACAAATATAACGCTGGTTTTGGGTTTTGCAATT  
TGAATTGTGTAACAGTTTCAGCGATTGTGTATCATTAGCAATGTCAGCTGAGGATGTCTTAATTTAATTTA  
AAAATGCCTTGTGCCAATCAACACACTTTCTTCGCTTATTAATTTACGACAGGTTCTCTTTACTTTGGTTTT  
GGGTTGGCTTGTGGATAATAGTGTAATAATGCGTTAACAGCTTGTACTTTCGTTAAAAAATGCTCATAAAAG  
TGGTTGTATAATGATATGTCGACATACATATTTTCAGCTTGTACCTAATCATTTTAGTGGTATACGCCAGTA  
TATAACCATAGAGCTATGTAGGCCCCATTTTTATATACTCTAATGCTGTGTATGAATTTACTTCTCCTACTC  
CTTAAAGTACAAATATTATTTAGCTAGATGGCAAACCTAGGTCAATTTATCTGACTGCTATTCTAGCAAACA  
AGTTGACTATAATCAAATTTTAGAACCTTAGAGCTGTCTTAAAACGAACGAAATATGAATTTTACAATAG  
GTAAATAATCTATAATGATTTTTGTGAAAATGTATGTTGCATACAATAAGGTGTCTCCAGCCCCATAAAGTA

TATGAACGTTAATTTAGAAACCTGTAAGGTTTACAAACATGCATTTTCGAATATTGTTGTTTCTAGTGCCC  
GCACAGTGTTAGTTTGCTTAATAAACGATAACTTATTCTCTATCAATATTGGGGGGGTTTTTTTTTTTGAGCA  
TTATAAAGCTAGAGACATTATTCAGACTGTCGTTTAGTGTACGCAGATCCTCTTTCGTGAATACCAACCCC  
CATCACCTAAATTTTAACTGAATATCATTCTTAGAGAAGCAGACTGGGTCTTTGTTATTTTCACACATTTG  
GATGCCGTTCTTGTGCCCTTATAATATGATAAAGATTCAACCATAAACACCGAAGTCAATCATGAAAGAA  
TTTACCATAAGTGGGGCTAAGTGCTTTAATGTGCCAGTATGCTAATAAGGTCTTAATGTGGTTTATTAAAG  
TTTTTGAGGGTAAATAATGCTCACAATTTTGAAGAATACGAATCACTCTTCATTATTATTATCGTTATTTCAG  
TGGATTGATCGTTTCAGTCAACATTATAAATTGATTTAATTTTAAAGTTTTACCTGAGGTTTTGACTTTACCAC  
GTTATTTCCCTCGATTACACGAAAAGTGTTCAATAAAATCAGAATATGCGTTTTAAGTTTTTAAACTTTAATC  
ACTTTACCAAACAGTAATGACTAATTTGAATCTGACTTTCCATCTTACTTGCAACTTCACACTTAATGTTTC  
CAGCTGTGTCTGCTAAATGCGATTAAACAAGATTGTGCGAAACCCATGCCCATTTTAAATGGGCAACATGAA  
ACAAGCGGCAATCTGAAAGCTGATATTGTTATGTGGATTGTGCGAGTGGCCATAAAGCAATATAAACAAG  
ATCGTTTAAATCAGCTGAAACCGTTTGCCTAATACTCTGCTTATAATAGTCTATCCAACCTATTTAGTGCTTC  
ATGCAGCGACTCTCAAAAATGAACATATGCAATTTATAAGGAGTGTGCGTGATTTCATAGTTTCTGTGCG  
ATCTGTTTTCTGCGAGGACATTGAACCAAAGCCAATTTACTCCTTTTCGCTACTTGAACGAAGTTAAAACAT  
AAGAAACACGTTTTTCGTGAAAAATAATGAAGATAGCCATTATCAACGAGATCAGAGAGCATTGTTGTAAGC  
GGTGTTTATCATCTTTGCGACACGTCTTATGGACAACCTGACGCTTTATATGAGCGTATATGGGTTTATTAA  
GTCTAAGTTATCCCGTACAATTTGAGGGAAACCAAATGTTTTTATACTTAGACGTGGACATTGCGGAATAG  
TTAGAGGTTTCGTTGACCATAAAGATTAAAGTTTTAATAAATTTACAAACAATAAGACTCATCCGAACAAA  
CGGATGGGCGGAAAGCAATAGGGACGTTACACAAAATAAATAAATAAATAAATAAATAAATAAATAAATAA  
TAAGTAAGCATAGGCATAGCCTTAAGCTTTACCATACGCAAAAATGCTTATATGGAGGCTCTTCCGCAATT  
GCCACACTTAACCTCTTAAATTTTAAAGAGCGTAAATATGGATCTAAATTGATCGATGCTGCTTACGAATAT  
ATATTTACTTAATGGGATCGAAGATAGTTCTTCTGCATACATACATTTGTACAAATAAATTCTATCCGTTTT  
AAATAAGTTCAGGGTATGGAAAACAGATGTGGAAATCGAGGACTATTAAGATTCAAAAATAAGTTGCGA  
ACACTACGCCGAACAAAGCAGGCTTGTAAAGACAAGCATTGTAAGTATTTTAAATTGTGAATATACCTGTG  
TTTATATACCTCAAACGCTATTGACTGTGACAAGGGCATCTCACTACCAATAAGTCCCGATTTCAGTATTT  
GTTTGTCAAGCTGTTAAAGAGTGCAGAACCAAAGACAATATAAACACTAAGATGAGTAACGCCATACATT  
TGAATGCGACGCAAAATTTGTAGCCTGGCCTTTCATCTGGCCTTCGAAGCTTCGCACGAGATGACTGCCGA  
CGGCTATTCGCTCTC

>9\_rnd-1\_family-287\_\_LTR\_\_Gypsy

CCGCCGGCCGCGCTGCAACCGTGCGTTGTTGATCGGTTGCTCAACACCGCATTCAAGAGCGCAACTCCA  
ATTCGGCGGCGAAGAGCGAAAGCTTCGAGGCGAAGTTACGAAAGCTCGCGGCGAAGTTGAACGGCCGAG  
GCAAGCGCATGGCTTGCTGGCGATCGCGCCGGGACTTTGGAATGAACGCTAAGGGTGAGTAGACGTGCAT  
TGTGAGACGAGGAAGGTCATAGAGTGTACATCGGAGCGCTAGGGCTCCAGAAAACAGTGCGGGTTCAGG  
GTTTCAGGGTTCAGCTCGTGAGGTACTATAAAGTAGCAATAAGCGAGGAGTGAATCAAGTACATTTGTTAT  
AATTATCGAGAGGAACCGGATAATTCTTTGTTTTTTGGTAACCTGGCTTACCTTAACATCGGAATTAACC  
GGCGTTCGAGCTAATCTCGATCAGATCAGATTGTGGCCCCGCGGTGGGCATTACCGGTTGGTGTTCGATA  
GAGTAGTGGTACGAGGCCACGGCCCGATAGAGCGTTTGGGTAGTGGAGTTGGCGCGAGGCTCTGGCCCGA  
TAGAGTAGTGGTACGACGCCACGGCCCTCAAGTGTAGTTGGTACGAGGCTACGNCCCGCTAGTGTAGTTG  
GTACGAGAACACGGCCCGGTAGTGTAGGCGTGCAAAAATAGCTCTAGGCTTGGTCTGGTCAGGAAACTCA  
CCCCCTTCCCCCTTAAGCCCTCCTTCCCAGCGAAATTGAGGGGCAGAGGGCGGAGTACTCAGGCAGCCA  
GCCCCGTAGCCCCGGGTGTCTCGAGTTCGAATAGTGCAGAATGGGCGAGGACGGCACAGTCCCCGGGGGG  
ACATCTCAATCCGCTCCGGTCTGCTCCCAGCGGATCCGGAACGACCGTTGTGGACAACAGGGTCTCCGCC  
CCACCCGCTGCAACACACGCAGAGGTGGCCCATCGGATGATGAGCCAAGAGGGCCGGGAACGGATATGAT  
CCGCGACGCGCGTGTGCTAGGTGCGCACAGGAGGGGCACTTCGCCAGAGAATGTCCCAACGCCCCCGTCT  
TNTTTTTGTTGGGTATGTGGAAGCCGGGGCCGAAGTAGTCAGGACCAGGATCGGGTTCGGCGCCGATACAC  
ACGGAACGCAGTAGTAGGACACCCGCTGAANGTGGACGGTGGCCGGATCGTCGCTACGGTAGAGATCGG  
CGGACGAACGATGCCTGCCACGATCGATACTGGAGCCACTCGTAGCTTCATGAGTGAAGACTGCGTACGC  
AAGTGGACGATTTCGGGAAGAGTGGAGGAAATACAGGCACGCATCCGCCTGGCGAATGGGTCCACCATAG  
AGGTGGAGAAAGCCTTGAGAGTAGACGTCAGCTTAGGGGAAAAAAGATCAGCATGACGATTCTCATCAT  
GCCCTCAATGTTGGACCACGTAATCCTGGGTATGGATTTCTTGGGTGCAATGGGCACTACAATACGCTGCG  
GCGAGGCAGAACTGGTCTTAGAAGCGGTGACGACACCGGGCGTGGGGCCAGGACCGAGCGAGGAGTCGG  
AGAAAGGCCTCCCGGGTCGTGAAAGGGGAGCACCTGCTCGGCTACAGAGGGAGCCGGAGGAAGGCCTCC  
CGGGTCATGAAAGGGGAGCACCTGCTCGGCTACAGAGGGAGCCGGAGGAAGGCCTCCAGGTCATGGAA

GGGGAGCACCTGCTCGGCACCCGATGGAAAAGGTCAGGAAAAGCGAAGTAAAGTCCGGCTCAAATCGAG  
AGCCCGAAGAACCCAGGAGGGGCGGCGGTAGAGCTGCAAAGGCAGACTTATGTTGGCTACGGAAGCGGC  
ACGGCGGGAACGTGCCAGGGAAAGGAGGGAGTAGGAGCAATGGCCAGAATCCACACGGACACAGGGGG  
CCAGGAGCGACTGCCAGAATCGAGCGGTCATGGAGTTCTGTCTGGAGTCGAAGTGGTGCCAGGAGGGGG  
CGAGAACGGCATCGAAGAGGGCGGAGTGGCCAGCGGATCTGGATCCAGAACTGAGGGGAGTTCTGGAGTCA  
GAGCTGGCTCTCTTCGAGGGGGCTGCGGGGAGTCTCACACATCGCGGAGCACAGAATCCGGCTGAGGGATG  
ACAAGCCGTTGAAACAGAGATACTATCCCAAGAATCCGGCCATGCAGAGGGTGATCGACGAGCAAGTGG  
ATGAGCTGATCCGGGGCAAATGCCATCGAGCCGTCGCGTAGTCCGCACAGCGCCCCGATCGTCTTAGTCAA  
GAAGAAGACTGGCGAGTGGCGTNTGTGTATTGACTACCGACAACGCAACGCGCATTCCATTCCGGACGCT  
TATCCGGTGCCTCGTATTAACCACATCCTGGAGCGGTTGCGTCACGCCCCGGTTCATCTCCACTCTGGATTT  
GAAGCACGGGTACTGGCAGATACCGATGGCAGCCGATAGTCGGGAGTGTACGGCGTTCACAGTCCCTGAA  
AGAGGTCTTTTCCAATGGCGGGTGATGCCATTTGGTCTACACTCGGCGTGTGCGACCTTTCAGCGAGCATT  
GGATACAGTAATAGGACCGGAAATGGAGCCCCATGCGTTCGCCTACCTAGACGACATCGTGGTAATAGGA  
GCAACGAAAGAACAGCATGTAGAGAATTTGAGGGAGGTATTCCGCCGGCTANGGGCGGCCAATCTCAGG  
TTAAATAGGAAAAAATGCAGCTTCTTCCGGGAGAGGTTGGTCTACCTAGGACATGTGATTTGCGGGGAAG  
GAATAGGTACTGATCCGGAGAGAGTGGAGGCGATACGTAGACTGAGGGCCCCGACAAATTGCAAAGAAC  
TGCGGCAGTGTCTCGGGATGGCGTCATGGTACAGGCGCTNCGTCCCTAACTTCGCGACGCAAGTACAGCC  
AATCACAGCGCTCTTAAAGAAGGGGGCAGAAATGGGCATGGNNGCAAGAACAGGAGGAGGCATTGCGTCA  
ATTGAAGGATAGCTTGACGACTGCCCCCTGTGTTGGCTTGTCCCGACTTTTCCGCCAAGTTCGTCTTGCA  
CTGACGCGAGTGAGTATGGCCTCGGCGCAGTGCTGACGCGAGCATTGATGGCCAAGAGCGAGTGATAG  
CGTATGCGAGCCGGAAGTCGCTGAAGGCCGATGTGAAGTATTCCGCCACTGAGAAAGAGTGCCTGGCAAT  
AGTGTGGTCGATCCGGAAGTTGCGCTGCTACTTAGAAGGGTACCGGTTGACGTGATAACTGACCATCTA  
GCACTGAAGTGGCTCAACTCGATCGAGAGTTTCGTCCGGAAGAATCGCGCGATGGGCGTTAGAACTGCAAC  
AGTTCCAATTTGACGTCCGTTATCGACGGGGGAAGCTCAACGTCGTGGCCGATGCGCTATCGAGGCATCC  
TCTAGAGACCTGTCAGCAAGCAGTGGTGGCCGAGGCCCCCTTGCAAATGGGTGCGGAGTGTGCGTGCCAGA  
ATCGCCGAAGAGCCATGCAAGTTCCCGGATAACATCGAGGAAAACGAACAGCTATATAGGCATTTGGGTC  
ACCGGATAGACGATGAGGACTACATCCCCTGGAACTATGCGTAGACAGTGGTCAACGCCAGAGGGTACT  
GAGGGAATGTCATGATGCTCCACGGCCGGACATCAAGGTGTCAGGAAAACGGTGTCGAGGTAAGCCCA  
GCGGTACTACTGGTCGGGTATGTTCCGCGATGCCACCAGATACGTGAGATGTTGCGAAGACTGTCAAAAA  
TTCAAGAGTGAGCAACTCAAACCTGGCTGGTCGCATGCTGACGAGGCAGGTGGCAGAGCCGATGGCGGTA  
CTTTGCGCGGACTTCGTGCGGACCCCTTCCACGGTCGAGACATGGAAACACGATACTACTGGTGTTCATGA  
CACTTTCTCAAAGTGGGTGGAATTGGTCCCTCTCAGGAGAGCCACAGCAGAACACCTGCAGACTGCGTTT  
CGAGAGAGGATTCTAAGTAGGTCCGGGTTAGAAAGTTTGTGTGCGACAACGGGATTTCAGTTTACGAGGCG  
GAGCTTCAAGTCGTTTTAGGGGTCCCTGGGTGTAGAGATCCAGTAAACCGCCCCGTAAGTGTCCGCAAGAG  
AATCCCCTGAGAGGACCAACAGGACTGTAAAGACCATGATAGCGCAATTTATTGAGGGCCACCAGAGTT  
CATGGGACG

>9\_rnd-5\_family-2109\_\_LTR\_\_Pao  
CCGGCAACGGAATCGTTCCGATGCCGAGTATGCNAGTCCANGCGCTGCGNAAGTGCCAGCGGTTTCATGC  
GGCTGTCTCCAGAGAAGAGACTCCGAGTAGTTCTGGTCAACAAATACTGCGCAAACCTGCCTGCCTACCA  
ACATTCCGGGGAGTCTGTGCGCCGAAGGACAAGTGCCGCAAGTGCCAGGGGCGACCATCACACCTTGCTT  
CATTTCCAAGAAGCGCGTCGCATGCCATCGCGATCTCCAGAGCGATCCCAAACAATGCGCAGCACCAAGG  
CCCAAGCGCGACGCTCCGCGCCGCCTTCATCCGCTGGTTCCATCTCCTTGTCGACTTTAATGGAACACAAA  
GGACAACCGTGCTCCCGAGAGCACTCATCCGACTTGGAACCGGCAAGGCGACCCGCGACACTCGGGCACT  
TTTAGACCCGTGCTGTCCGGTAAGTCTTATCGACGCATCCTTGGAACAGGCTCCGGGCTATCCGTCACCC  
GCGTCGGTAAAGACAACGCNTGCTCGGCCATTATAAGTTCCNGGACCTCTAGCTTCCAGCGAGAGGTCAT  
CCTGCAGGTGATGCCAAATCTCCGGTATCGAACTCCAACGAAGCTCGNCAGCGAGAACTGAACGAGCCT  
TTCAACAACGTTTCGATTGGCAGACGATCGCTGGTTCCAGCCGGAATCTCCAATCTGGTTTTTGGGCTCGGA  
TATCTACCCAGACTTAATTCTCCAAGGCGTCCTGCCGAGCCATGGCGGGCGCACCACTGGCCCCAAAACAG  
GTCTTCGGGTGGATACTGTCCGGCTCCTGCGCTCACCAGTAGGAACAGAGCCACTTCCCTCTCCCTTTTTCT  
TTTTGCAATACTGCAAGGCGGGCGGCATGTTACACAAGAAGTGTATCTCCGGCAGTCGCCATCCAACCG  
CCATGTAACCTCCGGAACCAAGTACATGGAACATGAAATTCACCTCACTTACACTAATAACATTGTAATGTACT  
CTGAAAATATAGAACAGAAAGAAAAATAACCTGCAAGCGAACAACAGTGTTTTTTTCAAACCTTCTTAAGT  
AAATTTGTGAGAGCAGAAACGCTCCCCCAACGATACAGAAATTCGTAAAAGTTCATCTGGAAGCCCTGC  
GGACGCCCTACTACATCATTTGGTCCCTTCGAGCCGGATNTCTCATCAACATTTGGCATATCCAGTTCGCCC

CAGCAAGCATTGGTGGATCTGCAATAAAAGGTTCCAGGAACAGCTACAAATTCAAACAAGATAAGTAGC  
AGTGCACCTACCTCAACTCGTCCATTGCCAAATTTCCGGCAACTCCAGTCCGATTAATTCATATTTGTGTGT  
CTGAACATATTTTTTCGCTTCACATCGTAAGGGCATCTAAAAAGTGACAAATATTA AAAACAATAAAACA  
GAAAGTGACTCCGATAAGGTCGCCATATTGGTGTCTGTACATATGTATGTATATATATATGTACAAGTGCA  
TACCCAAAAATTTAACCGATCGCCATATTGATGTACGCAAGTACATCAGACATATCTGCACACATAGGCTT  
TCGCTCCGTTGAACAACAAGTGTATGCGCTTCTCCATTCTAACCTTCACCAAATAATCACATACCTAAAAT  
ATAAAAAAAGACACACAATTCTGATTGGTATTTAGTTAATTA AAAACCACACTGTGCAAATTCACCTGCA  
TGTATACACACACACGCACATCATATTATATGTNTTCTATTTTATCGTTTGCTATTTTCTCTCCACAGCAGC  
TTCAAGATCAATTTATATATTTATTTTACCAATTAATTGGCAAGTGCAAAGGTAACAAACATCAGGGT  
TGTAAGTATCAAGATCGGTTTTTCGATAAACTGATTCTGAGAACTTTTATATTTTGTGTGTTTCCACTTT  
GCCATTGAGCTGCGTTTTACTTAATAAAAATACAAATCGAATATCCGTGCGNTTTTCTTAAAATATAACAAT  
TTATACAATATAATTATAAGNNA AACCTTCCATTGAGCTGCGTTTAGAATAAACGTACTTCTCCTGAGCT  
CAACAAGTAATAAGCAATAAGCATCAATTTTTTTTCGCGATCCGTTTCCACTACACGGCCGCTTGTCAAAA  
GAGAATTAATTTCTTTCTCTGGTGTTCATAAAGAAATAATTAGATTGTTTCTCAAGTAAAGGAAGCTAA  
ATAAGCATCAATTTAGNAAATTATTAGTAAAATAATTAATTTAACAAAATTTTCCGATTTTCGTTGGACCCA  
ATAGTGAACACCATTTTCGGTCATTCCATTTTATTCTGATATCTCGATTCCATCGTTTCTGTGCCATTTCTTAT  
TCCGTTTTTCGCTCGGCTGATTCAAATTATTTGTATTTGATCACATTTACCTGGTTATTACAATTTTGGCTC  
TGTGAAGAGCCTAGTATGCCAATCGGTGGTGATCAAAGCAGCCACAAGCGACTCACAGCACCGTCCGTTA  
AGGAGTCAAAGCGACCTTTAACCTCACCTAGAGCAGTTTTTCGGGAACTCAAGGTCGAGAGTACCAGCAC  
AACCGTCCGCAAGACTGTGAGTCCGATTCCAACAAGAGATATTACCCCAAAAATTACCCGTTTCGACTACG  
CAAAAAATGCAGAAGTCAAGCGAAATGGCACTGAACGACTTCGTTTCTATAACTGACCGACTAGGCCAGT  
TTGAAGTGAAGATCAATGACGCAGCGGACAGTGACGTGTCACTGTTCACTCTCCAAGTCCGACGAGATCA  
GATTAAGACTTTTATGGGAAAAGGTAGAACGCGAGTACGAGTTACGTTCCAAAGCTCTCAACNAAGGCGCT  
TGCAGCAGCAGTGACCTGGTGGCTATGCAAGCTAAATATGATTACTCGTACTCCGTTTACGAGCGATGTGC  
GGCTCAACTAAGTGAAAAAATAGAAAGAGCCACGGCTTCAAATAGACAAGCTGAGCAAACCCCTCCAAC  
TTCTCCATGTCCAGGGGTTGCAGTCTCCCGCCATGCGACACTGAAGTTTTTCAGTGGGGATTACCTACGCTG  
GCCTACTTTCCGAGACTTGTTTACAGCGGTTTATATTAACAATCCAAGATTGACGCCGGTGGA AAAATTGT  
TCCATCTAAATTCCAAAACCAGCGGCGAAGCTAGGGCAATTGTCTCCAAGTCCCCGCTCACGAATGACGG  
CTTTCAGTCAGCGTGGGCGAGCCTGACGGAGAGATTTGAGAATAATCGACTATTAGTCAATAGTCAATTG  
AAAATTCTTTTCAATCTCCCCTCAGCAACACAAGAGTCTGGAGCCGCCCTTAAAGAGCTTCAGGGCACAA  
TCCAGGGATGTTTAACGGCTCTCGACTTGTTCCAGGGTGAGCACCGAAAATTGGGATTGTCTGCTTATTTTC  
TTGTGCTCCTCTANATTGCCTAAGCTCACGCTGTCGTTATGGGAACAATCGCTCCACGATAAAGCAGAGAT  
ACCTCAATGGTCCGAGATGAATTCATTTCTGATCGACCGGATATCGCACCTTGGAGGCGATAGAGGATGT  
ACGACCTACCGCACATACGCCACCCAGTCCAAACCCACAAGAAAAAGAGTCCAACCACCTGAGAACCTT  
CGAAGCAACAGTGACTACAAAGTCACAACACTGCAAATTGTGTCTAGAAGGAAAACCATCCCGTGCGTCTA  
TGCCACGTTTTTCTACAAATGTCCGTACCCGAGAGAGTTTCCGTCAATTAAGCAACAAAAGTTGTGCTTAAA  
CTGCTTCGCCAGACAGCACCAGTTGAAAGACTGCACCAGCGCACATAGTTGTTTCACGTGCAAGGAACGT  
CACAACACGCTGTCTCCACCGTGACAGACCCAGGTGCCCTCAGCTTCCACAACACCAATAGTTTTGAACC  
CTCCTTCGTCTATACAGTCCACTTCTNCTTCACCCAAGCTCCGTTCAAACTACTTTTCCGCAAACTCACAT  
GGTGTCTCTCTCGGCACGGCTGTCTATCCAAGTGTGTCAATTTGGGCACAAAGTATACAGCTCGGGCATTAA  
TCGGACTTCTGGGTCTGAAGCGACCTTTGGCTTCAGAGCGATTGTTCAAAGNGGTAAACTTCTTTATCAA  
CCCGTCGACGCACAGGTCTCCGG

>9\_rnd-1\_family-293\_\_DNA

ATATATAATATTGCCAGGTTGTTTTTGCATTAACATAGGATGTTATGAGAGAAATAGAAAAATGAGAATTT  
CTCAAAATCTGTACCGATGATTTTAATGAAATAAATAGCAAAATGATTGATAAATCGTGCTCTATATGCAC  
AACTACCGTGCAATTTGGGGCNGTTTCGCAGAAATTAATAATAAAGTTTAAAATATGGCTGCCATTTAAC  
AGCGCGATATATAATATTGCCATGTTGTTTTTTGCATTAACATAGGATGTTATGAGAGAAATAGAAAANTG  
AGAATTTCTCAAAATCTGTACCGATGATTTTAATGAAATAAATAGCAAAATGATTGATAAATCGTGCTCTA  
TATGCACAACCTACCGTGCAATTTGGGGCCGCGTTTCGNAGAAATTAATAATAAAGNTTAAAATATGGCTGC  
CATTTAACAGTATGATATATAATATTGCCAGCNTGTTTTTTTGCATTAACATAGGATGTTATGAGAGAAAT  
AGAAAAATGAGAATTTCTCAAAATCTGTACCGATGATTTTAATGAAATAAATAGCAAAATGATTGATAAA  
TCGTGCTCTATATGCACAACCTACCGTGCAATTTGGGGCCGTTTTTCGGAGAAATNAAATAATAAAGTTTAAA  
TATGGCTGCCATTTAACAGTNTGATATATAATNTTGGCAGCTANTTTTTTCGCATTAACATAGGATGTAAAG  
AAAAAATTGGA AAAATGCAATTTTTCCATAAACTGCGCTATTAAGTATGACTTAATACTTCTCATATAATT

TGCTTTGACTTATTTTAATTTAATTNACTGTGAGTCCTTTCCGTTTTTCATGATNACATATNATTCAAATTG  
AATTGGTTCCCGCCCAATTCTGTACAAAATTGTTCAACACTGATGCCAGGCAGTGATTTCAGTTCACGTAGG  
AACTAGCAGTTCGATAGACTTTNTGAATGAACTATATGAGGTTGGTTTACAATTAATTAATTTTCTNAAAA  
TCTGTACCGTCCATTTACTTAAANTTAGTGCCTAAAGCTTCTTAAAATATGTATCTACAAGAGGGTATANC  
GTGCATTGAGGGCCATTGTCTCTGAGTTAAGAAATAAGGGCTCGAAAACAAGGTTGATTTTTTGCGGTCAT  
TTTATATGGGGCTGACTTGGGGTGTGTCACCTTTTTCCAAATATCTTAAAAATGGTACCGACGATTTTAAT  
CAAATTTTCACAGTTGGCTAGGTGAAACTATAGGCTTTAATCGTGTATATGCGGTTTTCGGGGCCATCATC  
CCTAAATTTAGATATTTATGGAATGGTGGAAACCTAATATTTTAACCCCTTGGTTTACCCATATTATAAATT  
AAAATTCAAAAAAACAAATGAATGTAGGCAGTAAATAATTTAATTTTTTGCAATTCTGCATTTAAATTTAT  
TNGGTTCCGTGCTTAAAAACATAAATAAATGCATTTAAAAAGTGACCGATTTCCTTTTTCCGATACCAAGTACC  
AAAATTCGACGCTAAGTCACCGCCGCTAATTTGACGCACATACAGAGTGAACATCGGGAATATAGCGGCG  
ATCAAAAAAGTACAGCGCGCGCGGCCAGACGGGCGACAGTGAGACCACGCTTGCATACGTGTGCACAG  
ATGCGCGCCCGCAGCCGACGTGCGCGTCGAAGGGCCGTTAAGGCGTCGCGACAGAGGCTGTACAGTGGGA  
CGAATTCAACTCGCGTGCGGTGAAAAGTTGAATTCGTACAGTACAGCCAACGCGGGCAATGAGAACGGGA  
GTGTTCAAAACGAAGTATATAGATTTATATATACACAGATAATAATACAAATTGTAGAATGTTTTAACAA  
CTATTTAAAGTATTTATTTTTATATAAATAACATGTTTAACTTATAAACATATATGTAAATAACATGTTTCA  
TCGTATGTGTACTTTTACTTATGTACTTTCACAATTTTTAGTTGTTTCGTCTGATTGGCCGACCGGGCGCTG  
TCCGCAAACACGCCCCGCTCGCCTCGACCGCCACAGAGAGATTTTTATTGTTGCTCATTCTACATATGATT  
TCAATTGCAAACAGAAATTTTAGAACAGTTTTGGGAGCACTTAAAACTATGCAACGTTTCACCAGTTTGCA  
AGGTGGAGAGGGACATGACAAGAGATACATTTAACATTTAATCTCGACTGACCTACATATAAACATAACA  
TGACATAACAGACTCTGTACATTTAACATATTGTCTTAGGTCAGTTAGCTGGGGAAATTTCTGCACGATCA  
GCTGGCAATGCTGTCGTGTGAATGGCAAGAATACATAAAAAATCAAATGGGCACGCTAAAGACATGTAAGT  
AGAAAATTATTTTAAATTTAACAATTTTTTGGCTAAATATACTAACAATGTCAATGTACTTCCACAAGGTG  
GCATCTTTATGTTCCCATAGGTTAGCATTCTACATAAGTTGGCAGCCCCCTAACATAGCGTCACTTTTGGATT  
CCATGCTATTTAATTCAAATGAAATTTATATGCATATTTATACATATGAACATATATATTTATAACATTTGT  
TATTTATTTGTTTATATTTTAATCTAACAAGTTTGAAATGGCTCCAGGAAACGCAACACGGCAAGATTTTT  
ATTTATTGACTGATTGTGTTTCGCTTTTTTAAAAGCCTGAACCCATTAAAAATGGGTAAAAGGGGTATAATG  
TATTTGTGCAGCCGTATGTAACAGGCAGAAGAAAGGATCTTCAACCACTTAAAGTATGTATTCTTGATCAG  
CATCAATAGCCTAGTCGATCTAGCCATGTGCCTCTGCCTGTCCATGCAAATCAGGTATCTTTTATTCTATAG  
CTATAGCGGCGTTTGTTGTTGGTAGGAATGGTATCCCCTAGCCGTGCACTCCCAACTANAGCATTCTTACT  
TGTTTTNTACCTAAAAGCTATTGAAAATGAATGAACATTTTTTCAAACGAACTGGTAAATAAAGGAATTT  
TAAATTTTGACATAACTTAGTCGTTAGTACATTGTTAAAATTTTTTTGAAATTGTACTGAGTTTTTAAACT  
AAAAACTAACGAGAAAGAAGGGCTATCTTCGGCACGCCAAAGATCTAATACCCTTGACAGACCCAACCTTT  
TCATAATGCTCATAGTGCTTTGCCTCTATCTAAGAAGTACCGGGAAAAATAGTAAATGCCGAGTTTGGTCA  
AGATATCTTGATAAAACAAAATGTTTTTTTCATACAACTTAATTTTCGACCGATCGTTCCTATGACAGCTATA  
TGATATAGTGGTCCGATCTTTATAGGATTTTGCACATATATGAGGAGTAAAGTAAAACTAATAAATGCC  
GAGTTTGGTCAAGATATCTTGANAAACANAATGTTTTTTTCATACAAAACTTAATTTTCGACCGATCGNT  
CCTATGGCAGCTATATGATATAGTGGTCCGATCTTAATAGGATTTTGCATATATATGAGGAGCENNAGTAA  
AACTAATAAATGCCGAGTTTGGTCAAGATATCTTGAAAAAAACAAAAATGTTTTTTTCATACAAAAAACT  
TAATTTTCGACCGATCGTTCCTATGGCAGCTATATGATATAGTGGTCCGATCTTNATAGGATTTTGCACAT  
ATATGAGGAGTAAAGTAAAACTAATAAATGCCTAGTTTGGTCAAGATATCTTGATAAAACAAAATGTTTTTT  
TCATACAAAAAACTTAATTTTCGACCGATCGATCCTATGGCAGCTATATGATATAGTGGTCCGATCTTAA  
TAGGATTTTGCATATATATGAAGAGTAAAGTAAAACTAATAAATGCCGAGTTTGGTCAAGATATCTTGAA  
AAACAAAAATGTTTTTTTCATACAAAACTTAATTTTCGACCGATCGTTCCTATGGCAGCTATATGATAT  
AGTGGTCCGATCTTAATAGGATTTTGCATATATATGAGGAGTAAAGTAACTAATAAATGCCGAGTTTG  
GTCAAGATATCTTGANAAANACAAAATGTTTTTTTCATACAAAAAACTTAATTTTCGACCGATCGTTCCT  
ATGGCAGCTATATGATATAGTGGTCCGATC

>9\_rnd-5\_family-10772\_\_LINE\_\_I

ATGCGCGAAGCCAACTACTGTTCAANGGAACAACAATAAGCAATCCAACCCTTCTTCTACGCTGCAGT  
NGCGAATGCGGGACACTATAGTAACTCAAAAACATCCGAACNAAACAAAAACAACTAGTCCAAAT  
CACAACAAACCAACCAAGATAACACAATGCCTTATGCTAATAAAGAAACAACAACAACACCCTG  
AACACCTCCTCCACGCGCTGACTTATCAGCAAAAATCAACAGAAAAACAACACAACCGGAACATTCGAT  
GATGACTACGAGAGTCTTGGCCTCTCGCCTAAACTACTCAATTCCTAAACAACTTAAATCTAACAAAA  
ATAAAAAATAATTCTAATTCAAACATCCTAACTACTTCTACCAATTTAAACAAAAATGAATATATCAACATA

TCAGATAATCCTATGGATGATTCTGCTATATAAACTGAACCTAACTTTTTCCATTGCATATAATATCCACTT  
TATCTCTTCCAATGACCCTTAAGATTCTACAATGGAACATAAACATAAAATGTATACTTCAACATTACATTG  
AACTTGCATTATTAATTAACAAACAAACAAACAAATCCGNATATTAATTGCCTNCAAGAGACTAATCTTA  
AATTTAATAATTCTCAAGTTGCAACCCCCAAACCATTTATTGGTTATTTTTTCAACAATTCTTCCATTCTCC  
ATGCGAAGTATGGCGTTGGTATACTTATACGGCAAAACATCCNACACAAAACCTATCAATTTGATCTCACC  
CACTTGCTCTATGGGCATTGANCTTTTATCCCACCCGAATATAATAATATTTAATTCCTTATATACCCCCAA  
CCAAAGACTATTAGCTACAGATTTAATAAATATTATAGAGTCAGCCCCAAAACCTATAGTTTTTTGTAGGG  
GACTTTAACGCTTGGAGTCCGCTTTGGGGGTCCTGCTCCCGGAACCCCCAAAGGTTATNAAGTTGAAGATCT  
TATAGTCAAAACAAACTTAGCCATTCTAAATGACGGCTCTGCCACCCACCATTCTACCCACAACCTCCTTTA  
CTAACATCGACCTAAGTATGGCGTCCGCAACCCTGGTACCATTCTGTAAATGGTCCATTGGCCAAAACCTTA  
CGCGGGAGCGATCATTTCCCTATTACTATTAACCTTCGCACACATATTAAACCTGAAAAATTTCCGCTTCC  
AATTAGGTTCAAAACCGACCATGCCAACTGGAGTACCCTTCCAATCTGTCTGTAAAAATCACTTTCAGTTT  
CCCTCGACCAACGATCTGAACCTCTTCGCCGCCAGAATTACGAAAACCATAAAAAACAGCAGCCAACGTAG  
CCATTCCACAAACTAATCCCAAATAACAGATAAGGTACCCTGCTTGGTTCAGCCCAAGTCTCCAAGATCTG  
AGAAAACAAAAGCAAGTTNTCTGGCACATCTATAAATCCTCTCAAAACTGTANCAATCTAGTAGCTTACA  
AAAAAGCGAGAGCCCTGTTTAAAAGAGAAGCTATTGGGGCAAAACGAGAATCTTTTAGCAGTTTCACCTC  
TAAAATAAACCCACTTTCCACAACCAAAAAAATGTGGGGCCGATATCAACAAATTAGNAGTGATTTTCCCA  
GGGCCTTTTAAATCCATCAGAGACAACAATGTAGAGCTCCAAAATTCAGTAGACATTGGCAATGCATTTG  
GAGCTATGTGGTCCAATTATTCCAGGGATGAAAACCTTCTCAAATGCGTATAAAGTTAATAAGGAAAACGT  
TCTCTCTCAGGCATATCTGCCCAACCACATATCCTCAAATTCTAAGTACCTTGAATCTCAGTTCACACTGAT  
GGAAGTAGAATTAGCCCTTCAACACGCTAAAGGGAAAACCTCCTGGGTATGACCGCATCTCGTACAATATG  
CTTCGAAACTTACCAATAGAAGGAAAGAAAAGAATACTAGAAATGTACAACATAATGTTAGATGGGGGT  
AACTATCCGGAAAACGGCTACAATTATCCCAATCCTTAAGCCAAACAAACCTTCCCACGAATTATCATCCT  
TTCGTCCCATATCCCTACTCTCCTGCTTGAGCAAAACACTGGAAAAAATTCTTGCCAAAAGGATCATGTGG  
TTCATATCCAAAAATAAACTTATCAGCCCCAACCAAACTGCATTCAAACAACAGCACAGTACCATTGACT  
CCCTATTGCATATCCATCATTACGCGTCAGATGCCCTTTCACCAGAAATCATGTAACCATCCTGGCTACT  
GATTTTCGAAAGGGCATTGAGCGCGTTGGAGTGCACACAGTACTGGAGCAACTTTCCCGGTGGGGGTTGG  
TCCTAAGACCTTCAACCTCGTGAAGGCTTTCATGACCAAGCGATCCATCCGTGTTAGAGTTAATAACACCT  
TATCTAAGTTCTATAAATTACACATCGGCATACCACAAGGGTCTCCACTCTCGGTGGTTTTGTTCATGATT  
GCCTTCAACTCCCTCAATAACATAATACTAAAACATAAGAAAATACAACCTCTCCGCGTACGCGGACGATC  
ATTATCTTTAGTAACTGCAAAAATACAAATTTACTCTTCCTTACGTTTAAACAAATACTTAATGATATCGT  
AGAATGGGGAAAACCTCTCAGGAGCCACTCTTGCTTTAAACAAATTTGTTCCCCCGCATACCATGCAGCA  
GTACGGCGTAGCATTGACGCCTTTCCCACTACTCCGACGAAATGCCTTTTAGCTGAAGCGGGTCTTCCTGA  
AATACAGACGAGAAGTGCACAACTGACTTTCAAACTCATCCCTAAAATTCCTTGCTCGACCAACCCAATTC  
TGCTTAAAGACTTTAACAGAACGGTTAAGCAGCGCCGAAGATTTAAAGTCTTGTCTACTATCCGTAGATGT  
TGCAGTTTTTTTCAAAAAACATCAATTGGATATGCCATATCGTTGGAACAAAATCAGCCCATCCCCCCTTG  
GCAACTACAGGACCACACCGTGAACACCTCTCTCCACTTATTAAAAAAATCAGAAACACCTAAAAGTATA  
TTTCAGCAAATGCTAGCGCCGAATCGGAAAAAATCCCCAACTGGAGTTGGCTCTACAGTGACGGATCGAA  
AACAAATTGACTCCACTAGCTTCGCAGTTGTAAGCCAATCAGGAAGTGTGGTCGCATCAGGAGTGCTCCCT  
GCATACTTTTCTATATATTCCGCCGAAGCTGTAGCTGTTCTAAAAGCAATTAAACATGCTCTCGAGCTTAA  
GGGAAAATTTATAATATGCAGCGACAGTCTTTCTACTCTCAATGCCATTAACAACGCATACAACCAAAAC  
AGCCTGATATGCGAAATTCGACATCTTTGCATCAAACACGATACCAAAATAAAACTCCTTTGGGCGCCAG  
GTCACATGGGCATAAAAGGTAACGAAGTGGCAGATGCAGCGGCTAACTGGCNGGACAGTCTCCTTGCTT  
AACAGTCATCCCTGGTGTGAGAGAAAGTATGGCGCAACATTGAGGATATCCTAAAAAGGGACGAAATG  
ACACAATGGGACACTTACGTCCATAGATTTAAGCAATTTAATCCGAACAAGGAACCCGTCGGATATCCAG  
CTTCATGGCACAGAAGACATTGCAGTGTTATCACCCGGCTCAGAACTGGGCACACCCGCCTTAACCCACGA  
CCACCTGCTTAAAGGAAAAGCCAATCCCAACTGCCCAAAATGCGGGGGGAGAATTATCAATCCAACACATA  
TTGAATAACTGCCCACAACCTTAATAACATTAGGACTTGCTATTTGGCCAAATCCAACCTACCTCTCTTCTT  
ACCACACCTACTCACAATAATGTAAAATTGCTAATCAAATTCTTAGACACCAATAACATACTAAATAGCA  
TATAATAATATATATATAATATAATATACATATAATACTATAAATAATTTAACTGTCGAGTCGATGGCCTT  
AGTAGCTAGCACTCCCTCCCGTTAGTTATTATATTTTTTTTGTATAATAATTAATTACGTAAANTAAATA  
AATA  
>160\_rnd-5\_family-151\_\_LINE\_\_I  
CAACAAACCAACCAAGATAACACAATGCCTTATGCTAATAAAGAAACAACAACAACACCACTGAA

CACCTCCTCCACGCCGCTGACTTATCAGCAAAATCAACAGAAAAACAACACAAACGGAACATTTCGATGAT  
GACTACGAGAGTCTTGGCCTCTCGCCTAAACTACTCAATTCCTAAAACAACCTTAAATCCAACAAAAATA  
AAAATAATTCTAATTCAAACATCCTAACTACTTCTACCAATTTAAAACAAAATGAATATATCAACATATCA  
GATAATCCTATGGATGATTCTGATATATAAACTGAACCTAACTTTTTCCATTGCATATAATATCCACTTTAT  
CTCTTCCAATGACCCTTAAGATTCTACAATGGAACATAAACGGGACTTCAACAATTACATTGAACTTTCA  
TTATTAATTAACAAGCCAATCCGTATATTANNTGCCTNCAAGAGACTAATCTTAAATTTAATAATTCTCA  
AGTTGCAACCCCCAAACCATTTATTGGTTATTTTTTCAACAATTCTTCCATTCTCCATGCGAAGTATGGCGT  
TGGTATACTTATACGGCAAAACATCCCACACAAAACCTATCAATTTGATCTCACCCACTTGCTCTATGGGCA  
TTGAGCTTTTATCCCACCCGAATATAATAATTTTAATTCTCTTATATACCCCCCAACCAAAGACTATTAGC  
TACAGATTTGATAAATATTATAGAGTCAGCCCCAAAACCTATAGTTTTTGTAGGGGACTTTAACGCTTGGA  
GTCCGCTTTGGGGGTCTGCTCCCGGAACCCCAAAGGTTATNAAGTTGAAGATCTTATAGTCAAAACAAA  
CTTAGCCATTCTAAATGACGGCTCTGCCACCCACCATTCTACCCACAACCTCTTTACTAACATCGACCTAA  
GTATGGCGCCCGCAACCCTGGTACCATTCTGTAAATGGTCCATTGGCCAAAACCTTACGCGGGAGCGATCA  
TTTCCCTATTACTATTAACCTTCGCACACATATTAACCTGAAAAATTTCCGCTTCCAATTAGGTTCAAAAC  
CGACCATGCCAACTGGAGTACCTTCCAATCTGTCTGTAAAAATCACTTTCAGTTTCCCTCGACCAACGATC  
TGAACCTCTTCGCCGCCAGAATTACGAAAACCATAAAAAACAGCAGCCAACGTAGCCATTCCACAAACTAA  
TCCCAAATAACAGATAAGGTACCCTGCTTGTTTCAGCCCAAGTCTCCAAGATCTGAGAAAACAAAAGCAA  
GTTNTCTGGCACATCTATAAATCCTCTCAAAACTGTACCAATCTAGTAGCTTACAAAAAAGCGAGAGCCCT  
GTTTAAAAGAGAAGCTATTGGGGCAAAACGAGAATCTTTTAGCAGTTTCACCTCTAAAATAAACCCACTT  
TCCACAACCAAAAAAATGTGGGGCCGATATCAACAAATTAGNAGTGATTTTCCCAGGGGCCTTTTAAATCC  
ATCAGAGACAACAATGTAGAGCTCCAAAATTCGGTAGACATTGGCAATGCATTTGGAGCTATGTGGTCCA  
ATTATTCCAGGGATGAAAACCTTCTCAAATGCGTATAAAGTTAATAAGGAAAACGTTCTCTCTCAGGCATAT  
CTGCCCCAACCATATCCTCAAATTCTAAGTACCTTGAATCTCAGTTCACACTGATGGAAGTAGAATTAGC  
CCTTCAACACGCTAAAGGGAAAACCTCCTGGGTATGACCGCATCTCGTACAATATGCTTCGAAACTTACCA  
ATAGAGGGGAAAGAAAAGAATACTAGAAATGTACAACATAATGTTAGATGGGGGTAACCTATCCGCACGCT  
GGAGAACGGCTACAATTATCCCAATCCTTAAGCCAAACAAACCTTCCCACGAATTATCATCCTTTTCGCCC  
CATATCCCTACTCTCCTGCTTGAGCAAAACACTGGAAAAAATTCTTGCCAAAAGGATCATGTGGTTCATAT  
CCAAAAATAAACTTATCAGCCCCAACCAAACTGCATTCAAACAACAGCACAGTACCATTGACTCCCTATT  
GCATATCCATCATTACGCGTCAGATGCCCTTTCAACCAGAAATCATGTAACCATCCTGGCTACTGATTTG  
GAAAGGGCATTGAGCGCGTTGGAGTGCACACAGTACTGGAGCAACTTTCCCGGTGGGGGGTTGGTCCTA  
AGACCTTCAACCTCGTGAAGGCTTTTCATGACCAAGCGATCCATCCGTGTTAGAGTTAATAACACCTTATCT  
AAGTTCTATAAATTACACATCGGCATACCACAAGGGTCTCCACTCTCGGTGGTNTTGTTCATGATTGCCTT  
CAACTCCCTCAATAACATAATACTAAAACATAAGAAAATACAACCTCTCCGCGTACGCGGACGATCATTAT  
CTTTAGTAAGTCAAAAAATACAAATTTACTCTTCCCTTACGTTTAAACAAATACTTAATGATATCGTAGAAT  
GGGGAAAACCTCTCAGGAGCCACTCTTGCTTTAAACAAATTGTTCTCCCCCGCATACCATGCAGCAGTACG  
GCGTAGCATTGACGCCTTTCCCACTACTCCGACGGAATGCCTTTTAGCTGAAGCGGGTCTTCTGAAATAC  
AGACGAGAACTGCGCAACTGACTTTCAAACCTCATCCCTAAAATTTCTTTGCTCGACCAACCCAATTCTGCTT  
AAAGACTTTAACAGAACGGTTAAGCAGCGCCGAAGATTTAAAGTCTTGTCTACTATCCGTAGATGTTGCA  
GTTTTTTCAAAAAACATCAATTGGATATGCCATATCGTTGGAACAAAATCAGCCCATCCCTCCTTGGCAA  
CTACAGGACCACACCGTGAACACCTCTCTCCACTTATTAAAAAAATCAGAAACACCTAAAAGTATATTTT  
AGCAAATGCTAGCGCCGAATCGGAAAAAATTCCCCAACTGGAGTTGGCTCTACAGTGACGGATCGAAAACA  
ATTGACTCCACTAGCTTCGCAGTTGTAAGCCAATCAGGAACTGTGGTTCGCATCAGGAGTGCTCCCTGCATA  
CTTTTCTATATATTCCGCCGAAGCTGTAGCTGTTNTAAAAGCAATTAAACATGCTCTCGAGCTTAAGGGAA  
AATTTATAATATGCAGCGACAGTCTTTCTACTCTCAATGCCATTAACAACACATACAACCAAAAACAGCCTG  
ATATGCGAAATTCGACATCTTTGCATCAAACACGATACCAAAAATAAACTCCTTTGGGCGCCAGGTCACA  
TGGGCATAAAAGGTAACGAACCTGGCAGATGCAGCGGCTAAACTGGCNGGACAGTCTCCTTGCTAACAGT  
CATCCCTGGTGTGAGAGAAGACTTATGGCGCAACATTGAGGATATCCTAAAAAGGGACGAAATGACACA  
ATGGGACACTTACGTCCATAGATTTAAGCAATTTAATCCGAACAAGGAACCCGTCCGATATCCAGCTTCAT  
GGCACAGAAGACATTGCAGTGTTATCACCCGGCTCAGAAGTGGGCACACCGCTTTAACCCACGACCACCT  
GCTTAAAGGAAAAGCCAATCCCAGCTGCCCAAAATGCGGGGGGAGAATTATCAATCCAACACATATTGAAT  
AACTGCCCACAACCTTAATAACATTAGGACTTGTCTATTTGGCCAAATCCAACCTACCTCTCTTCTTACCAC  
ACCTACTCACAATAATGTAAAATTGCTAATCAAATTCCTTAGACACCAATAACATACTAAATAGCATATAAT  
AATATATATATAATTTAANATAATATACATATAATACTATAAATAATTTAACTGTGAGTCGATGGCCTTA  
GTAGCTAGCACTCCCTCCCGTTAGTTATTATATTATTTTTTTGTATAATAATTAATTACGTAAACTAAATAA

ATANTTTATTGCCTATTAATNTTTGTACTTGGGCTTGAATTTCTTGTACTTGGCTATGAGGACTCATATAAT  
TTTTGATTTATCCGGGCTGATCATCCTT  
>9\_rnd-6\_family-1040\_\_LTR\_\_Gypsy  
GAATCGGTAGAAAGTTGTATCTGCTAAGCTGTAAAAGCTATGACCCAAAATTGTTTCGATTGATAAGGTAAA  
ACTTATCATGCAGGCAGGCACATTCACAAATATGAATGATGCCGTATCCAAATTTGTCAATAGCTGCACG  
GAGGCAACAGGTCAAAGTAACACTGTCCTGTATTATCGACGAGGCGCAAACAATAATAATAGAGGAGGC  
CGAGGTTATAATCGTGGCAGAAATTACGACCGCAACAATTAACAAACCGAGGCGGTAAACAACCAATAACAA  
TAATTACAATGAGAATGGCGCAAAATACGCCGGAAAACTCCCAGAACCCTTTAGGAAACAACCAGTAAA  
TGTAAGGTTTCATTCCATCAATTACAGTCTTAATATATTTGTcantTTTTTATAATCATTCAACTGGAAAATA  
AACTCACATTCCTAATAGATACTGGTGCAGATATCTCACTTTTTTAAAAAAATAAATTCAGATAATTTCAA  
ATTCAAGAAGANAAAAATTATAAACATCCAAGGCATAGGCCAAGGTGTAATAAAATCTCAAGGAACAAC  
TTCAATAGAACTTCAATCNACAAAATATATTATTCCACACGAATTTCAATTTTAGTAGATTTCGGATTTTTC  
ATACCGTGTGATGGAATAATAGGCATTGATTTTATTAATAAAATTCATTTGTCAATTAGATTTCAAACCAAG  
TGAAGACTGGTTTATAATTAGACCTCAAAATTTAAATTATCCAATTCATGTTCCGATAACATATAGTGCTG  
GCAACAACACAGTTCTCTTGCCAGCCAGATCCCAAGTAATTCGAAAAATAGACATTAATACGGTAAATGA  
TTATATATATTTGTTCCNAATCCAAGAAATACATAACGGAATTTATGTTGCAAAATACAATAGCAGCATCC  
AAACATGCATACGTTTCGCCTTCTAAACACAACCTAATTTTCGACCAATTGGTTAAAGTAAACAAAATCNAAT  
ATGAAAATTTAACAGATTACGACATTCATAGCACTAATCCAGAAAATAGAAGCGAACAAGTACTTTCAA  
ATTAAAGAAAAAATTTCCANAACAATTCAAAAATCAATTAACAGAATTATGCACCAAGTATAGCGATGT  
GTTCCGACTGGAAACCGAACCAATAGCGACAAATAATTTTATAAACAAACGTTNAGATTGAAAGATGAT  
GAACCCGTTTATATNAAAACTACAGAAGCCCGCATAGCCAAGAAGAACTCAAGCAAGTAGGGAAATT  
AATAAACGACAAAATCGTNGAACCGTCTGTNTCCGAGTATAACAGCCCCTCTTGTTAGTTCGAAGAAAT  
CATTACCAAATTCGGAAGAAAAAAATGGCGATTAGTAATTGACTATCGTCAAATCAACAAAAAAGCNCTT  
TCTGATAAATTCCCGCTTCCCAGAATTGATGATATTCTAGACCAACTGGGCAGAGCNAAATACTTTTTTCAT  
GCCTTGACTTAATGTCAGGTTTCCACCAAATTGAACCTGAAGAAAATTCAAGAAATATAACATCTTTTTTC  
AACGAGCAATGGCTCATATCGCTTCACGCGATTACCATTTGGTCTNAAAATAGCGCCAAATTCATTTCAGA  
GAATGATGACTATNGCATTCTCNGGTCTAGAACCCTCCAGGCATTCCCTTTATATGGATGACCTAATAGTG  
ATNGGNTGTTCCGAAAAACACATGATTAAAACTTAACNGATGTTTTTAACGTATGTAGGAAATACAACC  
TGAAGTTGCATCCAGAAAAATGTTTCATTTTTCATGCATGAAGTGACATTTTLAGGNCACAAATGCACCGAC  
AAAGGAATNTTGCCAGACGACAAGAAATNCGACGTCATCAAAAATTATCCNGTCCCACATGACGCGGAC  
AGCGCTAGACGNTTCGTTGCATTCTGCGATTACTATAGACGNTTTATAAAAACTTCGCCGATTATTACAG  
GCACATAACNAGATTATGTAAAAAGAATGTTCCNTTCGAATGGACAGNTGAATGCCAAAACGCATTCCAA  
TACCTTAAAGAAAGCCTNATGAACCCACATTGTTACAATATCCNGATTTTCGCAAAGGAATTTTGCATTAT  
AACAGATGCNAGTAAGCAAGCTTGCGGAGCGGTTCTAACTCAAACCGTAACGGANTCCAACCTCCCAATN  
GCTTACGCATCNNGNTCATTACCAAAGGGGAAAGCAATAAGAGCACAACGGAACAAGAGTTAGCGGCA  
ATTCATTGGGCAATTACNCATTTTNGACCATATATTTATGGCGAACATTTTACNGTTAAAACGGATCACAG  
GCCATTAACATATTTGTTTTCAATGGCNAATCCCGGTTCTAAAGTAACNCGNATGNGGCTNGAGTTAGAG  
GAATACGATTTACGGTAGAAATACCTAAAGGGTAAAGATAATTNCGTAGCCGATGCGTTATCAAGAATAA  
CCATCAAAGAACTAAAAGANATACAAGATAAAGTCCTGAAAAAGTCACTACCAGGCANCAAAGTAGACA  
GAAAAANCCCTGCGCAGGAGAAAAATCATGAANTTCTGCCNAGGCAAATCCGTGAAAANGCTTCTAAGCC  
CCAACGTATACGAAGTCATTACGAATGACGAAGTACGAAAAGTAGTGACCTTGCGTATAAAAANAATNTAA  
ATGTTTCTTTAAACACGGAANAAAATTATNGCAAGAATTGATGTTAGCGATCTGTATACCAATGGAATTCT  
CGACCTAGGTCAGTTCTTCCAAGGCTCGAAAAANAAGCCGGTATATTATAAAATCAGCCAACTCAAAG  
TGGCACCGAGCGGAAAAAGATCTTTGAATCAATTTCAATNGATTCTTTTAAAAATATGGGCAACGAAATA  
TTAAATCNTTAAGAGTAGCGCTACTCCAGCCGGTGACCCAAATAAAAGATAAAAAGAGATACAGCAAA  
TATTGTCTACATACCATGACGACCCAATTCAAGGAGGCGATAGCGGCATNACAAGAACGTTGGCGAAAAT  
AAAAAGACACTACTTACTGGAAAGATATGACNCGTCATATAACNGAGTACGTACGTAAATGTCAAAAATG  
CCAAAAGTCTAAAACAACGACGCACACNAAGACCCCNNTGACCANTAACNGAAACGCCTATAAATGCTTT  
CGATAGAGTGATAGTGGACACTATTGGTCCGCTACCAAAAATCGGAAAAATGGCAATGAATATGCAGTCACG  
CTAATATGCGACCTTACNAAATATTTAGTAGCCATTCCAGTNCCAAATAAAAAGCGCGAACACTGTTCGN  
AAAGCNATATTCGAANATTTTATNCTGAAGTNCGGTCCAATGAAGACGTTCAATNCGGACGTGGGAACAG  
AATATAAGAACTCGATTATAAATGATTTGTGCAAATATNTAAAGATNGANAATNTAACGTCTACNGCACA  
TCACCACCAGACAGTTGGGAACAATAGAACGAAGTCATNGAACNTTCAATGAATACATACGNTCNTATAT  
ATCNGTTGATAAACTGATTGGGACGTATGGCTTCAATATTTACTGTTTTTGCTTCAACACGACACCCTCN



ATGGCACATAATTATTGTCCATACGAGCTAGTATTCGGGCAGACTACCAAAACACTTCAAAGATTTTAAACA  
AAGNTAATATAGANCCCATATATAATATAGATGACTACGCTAAGGAAATAAAGTNTAGATTAGAAATAGC  
ATACAAAAGAGCTAGAATNATGTTAGAAAAAGCTAAGGCTATAAGAAATTAGCATATGACGAAAAAAC  
AAAACAACCTTCGAATNAAAAGTAGGAGATAAAGTTTTATAAGAAACGAAACAGGNCATAAATTAGAACN  
AGTATATTCAGGNCCGTATANAGTAAAAAAATAGAAGATAATGACATNATAATNAAAGATAATAAAGA  
TAAAAAACAAAAAGTTCATAAGGATAGATTAAAAATTTTTATTTTCATAATCATAATAAA  
>9\_rnd-5\_family-1151\_\_DNA\_\_Maverick  
ATAATGCCTGTAACATAAATTACAAAGTTGCCTCATTTATCCCCGTACTTTTTTCATAATTTTTTCACACTATG  
ATGCTCATTTGTTTGTAAGAGAGTTGTCAAAAGTTGAAGGTGAAATTAAGGTTCTACCTCTCAATAAAGAG  
ATTTACATATCCCTTTCAAATAACACATATATTACAGAGCATAATACAAATTTGGANATACGTTTTTLAGAC  
TCATTTTCGATTTATGGCNGCAAGTTTAGATAGTCTTAGCTCTAATTTAGAACATAATAATTTACAACTGTT  
AAACGGTTTTCCCGGACGAAACACACTTTAATCTAGTACATAGGAAGGGAGTTTTCCCATATGAATACTTT  
ACTAAATTTGAATGTTTGCAAGAACTGCTCTTCCACCAAGGGAAAAATTTTTCAACAGTCTTGCAAATAG  
AGAATGTTTAGATGATGATTATTTACACGCTCAGAACGTGTGGAGAGTTTTTAATTGTAAAACCTCAAAG  
ATTATATGGAGCTGTATTTAAAGACAGATGTACTTTTGCTTGCAGATGTTTTCGAAAATTTTCGTTTAATTT  
GCAAGAATATTTATTCATTGGACCCAGCCCATTTACACAGCTCCGGGGTTATCTTGGGATGCTATGCTA  
AAAACAACCTGGAATAGAATTAGAATTATTTACAGACATAGATATGCAAAGATTTATACAAAATGGTATTC  
GTGGGGGATTAGTACAATGTTGTCAGAGATATTCAATTGCTAATCATAAGTATATGAATGATTATGATAGC  
ACAAAACCTCTCAATATTTAATGTATTTGGATTCAAATAATCTATATGGGTGGGCGATGTCACAATATCT  
TCCATATGGTGATTTCCAGTGGTTAAGTGAGGATGAAATACGATCATTTCAATTTATTTCAATTTCTGAAA  
CGTATGAATATGGATATATTCTTGAAGTAGATTTAGAATACCCAGCATCCCTTCATGATATGCATAACGAC  
TTGCCGTTTTGTCCAAGCAATCAAACCGACTGCAAAGTGTACAGAGTTAAAAAGCTTATCGCTGACCTA  
AGACCGAAATATAAATATCCCATACATTATAGAAATCTTCAACAATGTATTCATAATGGATTGCGGTTAAC  
TAAGATTTACCGTATATTACGGTTTAAGCAGTCTCCTTGGTTAAGAAAATATATTGATATTAATACATATC  
ATAGAACGCAGGCGAAAAAAATAATTTGAAAAAGATTTTTTTTAAGCTATTAAATAATGCAGTATATGGG  
AAAACCATGGAAAACGTTGAAAAACGTAAAAAACATTAAATTGGTAACTGCATGGGAAACAACGTCTTG  
CAATAGATTGGGAGCAGGGGCATTAATCGCAAAATCAAACCTTTCATAGCTCAGTGCAATTCTCGAATAAT  
ATGTATGCAATCCAAATGAAAAGATTGCATAACTATTATAATAAGCCCATATATTTAGGTTTTACAGTATN  
AGATCTTTCGAAATTGTTGATGTATGATTTTCATTATGATTATATGGTAGCAAAGTTTAAATCTGATCTAGC  
ATTAAATTATATGGATACAGACTCCTTAATATATACAATTA AAACTGAGGATTTTATGCAGATATTAGAGA  
TGATCTCGAAATGAAATTTCGACACATCTGAATATTCTGATGATCATGCTCATAAATATGCCCTAAAGAGA  
GTTAATAAAAAAAGTCTTGGGCATGATGAAAGATGAGAATAATGGTAGGATAATGAAAGAATTCATAGG  
ACTTCGACCCAAAATGTACTCATTGAACTTGAGGACGGAGGTGTGTGTTAAAAAGGCAAAGGGTATTAAA  
AATCAATTTTGGAAAACATCAATTAATGCTTTAAGATTGTCTTTTCAATAATAAATCATATACAACGAAT  
AATATGTTNATTTTNAGATCTAACTTACATAAATTGTAGACTCAANAAATAAAAAAGTAGCTTTAAGTTCTC  
AAGATGATAAGAGAATAAGAGATGATTGTATGCATACTTATGCATGGGGTCACTATAAGATTGTAAATTA  
ATTGGTTAAATAAAACATTA AAAAAACGGATTCGACTCCTTTTNATTTTATTCTGAAATTGTATATAAATT  
TGAGAGAGAGAAAGAGTTAAACGGAGTTACCTTTAAAAAATTAANTTAAATTTAAAGATTNAGATTTATA  
AAACATCGTGAGATTCAAGAAAATATAATATCATCTACAACCTCGTGNGCTTTTTTGATGAGGATGATGATA  
CCGTTGAAGTCCCTGAAACAGNCATTGAAGATGAGGAGGACGATATATTTAACAATANACANCATTATTT  
GAATCGAGAAGCTCAACCAATANNATTATCAGATAGTGAGGNAGA ACTNTTTGAATACCAAAATTTATTT  
GATTAATAAAATCATATATATTTTACAAAACCTATATCCTTCTTGNTATTATATATATATATATATATTTTA  
CAANACTATATCCTTCTTGTTTATTCTATTTTCATTAAAGAAGTTTTTGCGAATAATTTTTTAAATTAATCA  
ATCGCGTTTTTCAGATCTTAAGNATTCCTCAAATATTNAACTCATTCAACCTCTCCTCTTATATCTTATCTT  
TCAGCTTCTTTAACAGGTAAATTTAGATGATCTGCATGCTACTTTTATAGGTACACCTTTTGTTGAGACAT  
ATTCATCGTATTGAATCATAAAAATGTCTATAAAAACGATGTATTACTCTAAAAATTGCAGAAAGAGGCAA  
ACATCTTTCTGAACTAGCTCTTGCTTACACATCTTTTGCGCTTTGAATTCTCATCAAGTTGAGATGGGAATT  
AGTAGCGTATTATAACGTTGAGCTACTAAATTAACATATAATATTTATATAGATGAGTGCACCTTTATATTT  
TCAGAGCAAACGATAAAATATTCATTTATATTAAATCTATAAATCAAACCTAGTCATAACTCTAATTTCAA  
AAAAAAATTTTCACATAAAACTTTATTGCTTCCGAGAAGAACGTCGATCTGTGAGCTGCTATAGAAAGAG  
AGATCGGCCAGTGTAATTTTGGAAGTTCTTTCAAACATTTTGGGGGATGGTGTGGGGCAAATTGCCAG  
CTAGCTTTGGAAGAACATAAGCCGAGGTTTCAATATTAGCCGGGGCGTTATCGGAGAGCCGATATTA AAA  
NGACAGAGTATTTGGGGCCGAGCCGAAATAGCTTGATTTAAACCGGAGACCTGTGCGTCGACGGGTGAT  
ATGGAAGTTTAACCCTTTTGAATAATCGCTCTGATAAAAAGCTCGCTTCTGACCCTGTGTTGATTAGTGCC

TGAGCTGTATATTTTGTGCCCAAATGACACACTTTGATGACAGCCGCTCCGAGGAGAACACCATGTTAGTT  
TGCGGAAAAGTAGTTTTGAACGGTAGCTTTGGTGGAAGTAGAAGTAGACTGTATAGACGAAGGGGAGCTC  
AAAACCACTGGTATTGCAGAAACGGAGGGCACCTGGGGTCTCTCACGGTGGAGCAGCATGTTGTGACGTC  
CCTTGCACGTGAAACAACAATGCCCACTCGTGCAATCCCTTATCTGGAGCTGTCTGACGAAGCAGTTTAAAG  
CACAACTTTTGTTGTTTGATGACAGAAAGTCTCTCGGGTACGGACATTTGTAAAAAGTGGGCATAGACGC  
AACGGATGGTTTTCTTCTGACACAATTCGCAGTGTTGTGTCTTTGTAGTCACTGTTTCCTCGAAGGTTTTG  
CAGGTATTTATTACTATTTATTTGTGGGCTTGGACTGAAATGGCGTATGTGCGGTAGGTCGTACATCCGCT  
ATCGCCTCCAGGTGCGATATCGGTGATCAGAATTAAATTCATCTCGGACCATTGAGGTATCTCTGCCTTA  
TTGTGGAGCGATTGTTCCCATAGTGNCAGCAATTTATAGGAGCACAAAGAAAATGAGTAGACAATCCC  
>9\_rnd-1\_family-332\_\_LTR\_\_Gypsy  
CAATTGAAGGATAGCTTGACGACTGCCCCTGTGTTGGCTTGTCCCGACTTTTCCGCCAAGTTCGTCTTGCA  
GACTGACGCGAGTGAGTATGGCCTCGGCGCAGTGCTGACGCAGACGATTGATGGCCAAGAGCGAGTGAT  
AGCGTATGCGAGCCGGAAGTTGCTGAAGGCCGATGTGAACATTCCGCCACTGAGAAAGAGTGCCTGGCA  
ATAGTGTGGTCGATCCGGAAGTTGCGCTGCTACTTAGAAGGGTACCGGTTGACGTGATAACTGACCATC  
TAGCACTGAAGTGGCTCAACTCGATCGAGAGTTCGTCCGGAAGAATCGCGCGATGGGCGTTAGAAGTCA  
ACAGTTCCAATTTGACGTCCATTATCGACGGGGGAAGCTCAACGTCGTGGCCGATGCGCTATCGAGGCAT  
CCTCTAGAGACCTGTCAGCAAGCAGTGGTGGCCGAGGCCCTTGCAAATGGGTGCGGAGTGTCGTGCCA  
GAATCGCCGAAGAGCCATGCAAGTTCCCGGATAACATCGAGGAAAACAAACAGCTATATAGGCATTTGG  
GTCACCGGATAGACGATGAGGACTACATCCCCTGGAACTATGCGTAGACAGTGGTCAACGCCAGAGGGT  
ACTGAGGGAATGTCATGATGCTCCACGGCCGGACATCAAGGTGTCAGGAAAACGGCGTCGAGGTAAGC  
CCAGCGGTACTACTGGTCGGGTATGTTCCGCGATGCCACCAGATACGTGAGATGTTGCGAAGACTGTCAA  
AAATTCAAGAGTGAGCAACTCAAACCTGGCTGGTCGCATGCTGACGAGGCAGGTGGCAGAGCCGATGGCG  
GTACTTTGCGCGGACTTCGTGCGACCCCTTCCACGGTCGAGACATGGAAACACGATACTACTGGTGTTC  
TGACACTTTCTCAAAGTGGGTGGAATTGGTCCCTCTCAGGAGAGCCACAGCAGAACACCTGCAGACTGCG  
TTTCGAGAGAGGATTCTAAGTAGGTCCGGGTTAGAAAGTTTGTGTGCGACAACGGGGTTTCAGTTTACGAG  
NCGGAGCTTCAAGTCGTTTTAGGGGTCCCTGGGTGTAGAGATCCAGTAAACCGCCCCGTAAGTGTCCGCAA  
GAGAATCCCCTGAGAGGACCAACAGGACTGTAAAGACCATGATAGCGCAATTTATTGAGGGCCACCAG  
AGTTCATGGGACGAACTCTTGCCCGAGATCTCGCTGGCGGTGACACGAGCGTGGCAGATTCAACGGGT  
CTAGTCCCCTTTCTGATGCAGGGCAGGGAACCTCGGTTACCCGCAGCTCTGTACGATCAGATGACTCCG  
GGGTCCGCCACTAGTGCGCTCGACCGTAAGACTAAGGCGGATAGGCTAAAAGAAATTTTGTATATCGGGC  
CGGTATTACAACAGGGCCGGTATTACAACCTTGCGAAGACGATAGTGGCGGCCTTCGTGACTCGATGGT  
CCTGTTGAGGCAGCACCAGTTGTCCAACGCAGCTGAAGGTTTCGCCGCAAAGTTGGCACCCAAAGATGAC  
GGCCTCTACAGGGTCGTCAAAGTCATGTTCCCAATATTGTAGGGCTGGTGAAATCAGGCGAGCATAAGA  
AGAGGGTGGCCAACATTTACAGTTGAAACCATTCTACCAAAGNCGACGGGCGACGAAGAAGACGAAG  
ATCCAGGGCACGTAAATGNCCACGACTAGGCGAAGGATGAGAGCGACTCCCGTCGCCCAACGAAACCAT  
TATAATAAAGTTTAGATAAGACTAACATAATAACATAATTGAGAATAGGCCTAGTAAAATGTGAGCCGC  
ACAGAGAAGATAGGGCATTAACAAATAAGTAACGAGTAAGTTAACCAATAAGCTGAATTTACTTTACCGA  
ATTTACATCTTGCCGACGCAGAGAGGCGACGTGACCGTCACCTGCTCGAAGTGAGGGGGGGGTGTGAGGC  
GGCTAGTGAGGTCCGCCGTCCCACAGTTTTCTTGCGGAGGAGCCATCGTTCCCATGGCCGAATCACGGCG  
AGGAGCCGCTGGCGGGACAACCAACAATGTGTTTATAAGTCTTGATGGTATTAGTTANATAAGAGGCAA  
GAAGCCGCCAATGNTACAAGTAGCAATTGTATTAGTTATATAAGAGGCAAGGAGCCGACAATATTATAAG  
CCGCAGTGTATTAATTATATTATAATCACCATTATATTAGTGAGTAAGGAGGCGAGGAGCCACGAAGGT  
TATGGGAGCGAATTTGAATTTAACCGCCGGCCGCGCTGCAACCGTGCGTTGTTGATCGGTTGCTCAACAC  
CGCATTCAAGAGCGCAACTCCAATTCGGCGGCGAAGAGCGAAAGCTTCGAGGCGAAGTTACGAAAGCTC  
GCGGCGAAGTTGAACGGCCGAGGCAAGCGCATGGCTTGCTGGCGATCGCGCCGGGACTTTGGAATGAAC  
GCTAAGGGTGAGTAGACGTGCATTGTGAGACGAGGAAGGTCATAGAGTGACATCGGAGCGCTAGGGCT  
CCAGAAAACAGTGCGGGTTCAGGGTTCAGGGCTCAGCTCGTGAGGTACTATAAAGTAGCAATAAGCGAG  
GAGTGAATCAAGTACATTTGTTATAATTATCGAGAGGAAACCGGATAATTCTTTGTTTTTTGGTAACCTGG  
CTTACCTTAACATCGGAATTAACCGGCGTTCGAGCTAATCTCGATCAGGAGCATCAGATTGTGGCCCCGCG  
GTGGGCATTACCGGTTGGTGTTCGATAGAGTAGTGGTACGAGGCCACGGCCCGATAGAGCGTTTGGGTA  
GTGGAGTTGGCGCGAGGCTCTGGCCCGATAGAGTAGTGGTACGACGCCACGGCCCTCAAGCGTAGTTGGT  
ACGAGGCCACGGCCCGCTAGTGATGTTGGTACGAGGACACGGCCCGGTAGTGTAGGCGTGCAAAAATAG  
CTTAGGCTTGGTCTGGTCAGGANACTACCCCCCTTCCCCCTTAAGCCCTCCTTCCCAGCGAAATTGAGG  
GGCAGAGGGCGGAGTACTCAGGCAGCCAACCCGTAGCCCCGGGTGTCTCGAGTTTCAATAGTGAGAAT

GGGCGAGGACGGCACAGTCCCCGGGGGGACATCTCAATCCGCTCCGGTCTGCTCCCAGCGGATCCGGAAC  
GACCGTTGTGGACAACAGGGTCTCCGCCCCACCCGCTGCAACACACGCAGAGGTGGCCCATCGGATGATG  
AGCCAAGAGGCCGGGAACGGATATGATCCGCGACGCGCGTGTCTAGGTGCGCACAGGAGGGGGCACTTC  
GCCAGAGAATGTCCCAACGCCCCCGTCTTATTTTGTGGGTATGTGGAAGCCGGGGGCCGAAGTAGTCAGG  
ACCAGGATCGGGTCGGCGCCGATACACACGGAACGCAGTAGTAGGACACCCGCTGAACGTGGACGGTGG  
CCGGATCGTTCGCTACGGTAGAGATCGGCGGACGAACGATGCCTGCCACGATCGATACTGGAGCCACTCGT  
AGCTTCATGAGTGAAGACTGCGTACGCAAGCGGACGATTCGGGAAGAGTGGAGGAAATACAGGCACGCA  
TCCGCCTGGCGAATAGGTCCACCATAGAGGTGGAGAAAGCCTTGAGAGTAGATGTCAGCTTAGGGGAAA  
AAAGATCAGCATGACGATTCTCATCATGCCCTCAATGTTGGACCACGTAATCCTGGGTATGGATTTCTTGG  
GTGCAATGGGCACTACAATACGCTGCGGCGAGGCAGAACTGGTCCTAGAAGCAGTGACAATACCGGGCG  
TGGGGCCAGGATCGAGCGAGGGGTCTGGAGAAAGACCTCCCAGGTCATGAAAGGGAGGCACCTGCTCGGC  
TGCAGAGAGAGTCGGAGAAAGGCTTCCCGAGGGGAGCACCTGCTCGGCTACAGAGGGAGCCGGAGGAAA  
GCCTCCCAGGTCATGAAAAGGGAGCACCTGCTCAGCACCCGATGGAA  
>160\_rnd-1\_family-328\_\_RC\_\_Helitron  
AATATATATATATTCAAACATAAATTAAATTATCAAATAAGTTAATATTATAATTATTTTCTTTTTCAGTA  
TCCATCTTAAGTTTTCGATTCTACTTAATTATTCTTTGTTATCTTAACATAACTTTAATTTTCGAAATATTTG  
GGAATAATTTCTTCAGTTTTTTTAAAAATGCCGCGCGCGTTTAAAAAATCCGCTAATCAAAGGCGCCAAAGGT  
GCCATTAATCGTAGTCGTGTCTACTACATAGAGAATACCGAAAGCGTTTGCCTTCGAAGTTCTCAAGGTTA  
AGCTGACACTCGTGAGTGCAACGGTGATATTCGTGAAGTAGACCGTAATACTGACGCCCTGGCCCGATCT  
AAAAGAAGAAGAAGTGCTCGATTTTCGACAGGATGAAAGGGATCTCGATGCAGCAGCTCGCGCAACGCAA  
AGACAGGATGAGGATATGCGAGCTCTGGAGCAGACACAAAATACAGCGGACCACGCTGTTTCGGCGACAA  
AATCTGGAGTACCGTACCCTAGAGCGCGAGCGCGATGCAGAAGCCCACGCTACAAGGAGACAGGACTTA  
GAAATNAGACTGCAAGAGCAGGAATTGAACACAGTGGAACACACTGTGCGTCGCCAAAACGTGGAGTAC  
CGCGAATCAGAACGCCAGCGAGATGCAGCAGCCCACGTTACAAGGCGACAGGATTTAGAAATAAGACTG  
CAAGAGCAGGAATCGAACACAGTGGAACACACTGTGCGACGCCAAAACGTGGAGTACCGCGAATCAGAA  
CGCCAGCGAGATGCAGGCGACAGAACTTAGAANTGAGAGTGCAAGAGCAGGAAATTAACACAGTGGAAC  
ACACTGTGCGTCGACAAAATGAAGAATATCGTGATCTGAGCGGTATACGTGATGCTTCTGCTCACGTAG  
CGCGAAGACTGAATGTTAATGTTTCGAGAGCTAGAGCAGGACGCTAATAACAGTTCAACATAACGTTTCGTCG  
GCAAAATGAAGCATATCGCACTAGAGAGCGTGAAAGAGACGCTTAAATCGGGCGAAATGCTCGTCAAAA  
TATTATCGCAAGACGCAGAGAACAAAGTCGTCAATTCTCTCAAAGACGAGTTACTAGAAACCAGGATCGT  
ATAAGAGAGAACGAATTACGAAATATGGCTGAAGCTCGAGTTATAAACTTTAGAAATTAGTTTTCAAAAT  
CGTGCCATACAGTCAGCTCAGCAATCTCAGAGAAATAGAGATGCTAGAGAAGAAATGTCAACTGAACAG  
CGCGAGCAACAGCGTGACTTGCAAAGACAGCGTAGAGTTTTTTCTGCCAGAGATAAATACCTGGAAAATA  
TTAAGAAAGGCCCTACAGAAATATGCATATCATGCGGAGGAACTTGGTTTTCTTTCCAAGTAAAGCTTTTG  
AATAAAATAAATCTATCGGCAAAGTTTCCAAACATGGATATTTCAAAGCATTTTATCTGTCCAATAAGTT  
CCCAAGTCTATCTGAAGACTATTTGTTTTGCTCCACTTGTCGCCGACACATATCGTCCGGCAAGATTCCGA  
GTCTCTGTCTGTCCGAGGGGTTCAACTTTCTGAGATTCCAGACTGTCTTAAAGACTTAACGTGTCTTGAA  
GAGCGTTTAATTTTCGCCAAGAATCCCATTTATGCGGATAATTTCTCTTGGCTATGAGCGGCAATGTGCAGT  
TAGAGGAGCTGTGGTCAACGTACCAATTTCTGTTTCGGAAACTGTGACAGCTCTTCCGCGCACCTTTGAAA  
ACAGTCATGTAGTACAAATTCATTTGAAGCGTAAGCTGGAATATGCGCATAATTTTCATGACTGAGACAAT  
TAGGCCCGCTCGTGTGCTCGAAGCGTTGCGGTATTTAATAAACACAGAATTATATCTTAAGCACAAATTTT  
CAGTTGCTTCCAAGTGGCTAGGTGTAATGCTCACAATGAAGAAGTCCCTTTTGTGCTGATCCAGCTGAT  
ATAACAGCTGTGGATAGCCTTCTTCGCTGCCGAATGGAAACAGATTCAGAAGGACACGANACTTCTGATC  
TTAATCCAGGTGGACAGGAACTTTGTTGGATAACGAGTCAATAGAAAACAATGCTATAATTGGTCGTAT  
TGCAATGGCTCCAGGTGAGGGTCGACGACCAATTGATATGACGACAGATGAGGATGCTGAAGAATTATCG  
CTCCCAACCATTTTCATGTGGCGAAATTTGTAAAAGCAAAAGTACTTATTGTGCAAGGCCAAATCACAGA  
TTCGGTATTACGATNGTCGTTGCGCGAAAGTACCAAAAATTCTGTATATGTATAAGTGTTATGAGCTCACA  
CGCATAAAAAGTTCTATTTCTATCTGCCTTCGGAAAAAATCAAGAAACGCCAATATCACCGTTGGTAACTT  
GAGAGATGAAGGTTTTGTGTCAGCAATCTTGTGTCAGCATGATGACGGATATCATGTTCTTAAGGGCCTGCGA  
TCTGCTCCAGCACATTGGGAGGCTGAGAAGAAAAAAGTGCTGGCAATGATTCGTGAGTTTGGACTACCAA  
CTTTTTTCATAACGCTTTCTGCTGCTGAAACCAAATGGAGTGAGCTGCTGGTCATTCTATCTCTCATTTTGG  
ATAATAGAGTCCTTAGTGAGGAAGAAGCAGCGAATCTTTCAAGTTCCGAAAAAGCTCGACTAATTCGGTC  
TGATCCTGTGACTTGCTCGAGATATTTTGAAGTATAGGTTTAGGCAGCTGTTGAAATTATTTAAAACAGATA  
TTTTTGAGAAATATCAACTCTCTCACTTTTATTGGAGAATTGAATTCCAACATAGGGGATCGCCACATTCA

CATGGCATGTATTGGCTAAGCAGCGCTCCTAAACTTAATGAGAATAGTTCCCAAAGTAGCCGTCAGGTTA  
TAGAATTTATTGACAGATTCGTTACAACAAACGGAGATAATCCAGATTTGGAAGAGGTAATTAAGTACCA  
ACAGCACAGACATAGCTTTTCATGCCAAAGAGAAAAAAATAGGCATAAAATTTGTCGTTTTAACATGCCA  
TACCCTCACATGCCTCAGACTGAGATACTATACCCCTAGAAAGAGGGGAGATTCAAATCTGAGAAGGCATC  
AAGACATGTGGAAGAAAATCAGAGAGCTACTGGATAGTTCAGTTTCGGGGCGCTGAAGCCTTAAGCTTAAA  
TAATTTTGATAGTTTTATTGTACTGGATATAAATNCGCACTGAGATCGAGTCTTAAAAAGCCGCAAATATT  
TTTGCGTAGAAAATACTGTGACAAAATGTTGAATGCATATAATAAAGATATATTGAAGCTATATAGAGCC  
AACATGGATATTCAATACATACTAGATGCGTTTGCTTGTTGAAGTTATATAATAAACTACATAAACAAATC  
GAATAGAGGGGTTTCTCAATTATTGCGAGAAGCCATGAGCGAGATAAGTAGTAATAACATTTTCAGTTAAG  
CAAAAACACTACAACATATCGGCAATAAGTTCATCAATGGAACAGAAATATCTGCGCTGGAGGCTTCATACA  
ACATCCTTGGACTCCGTATGTCAGGATGTAGCCATGGCGAGATTTTTGTAAACACTTCGCATCCTGATCAA  
AGAGTTGGTATGGTGAAAGCCCAGAGAGATTTAGAAACAGTACCTTCAGATTCAAAAAGATTATTTCTTAC  
CAAACCTTGCTAGATCATTATGTTCAAAGACCGGACGAATTAAATAATTTGTGCCTAGCTGACTTTGCTGCC  
AAATTTAAATATTCTAAGTCGCTAAATGCCATTCAACAGGAGACTACGAGGAGGAAAATTATGATGAAG  
AGCGGGAGGACAATGCCAATGACGGGAGTCCCATGGTACTCAAAAATAGATCAGGAATTTTGAGAGAAC  
GTAGGCACTCTCTTATTCTTCGGTGGAGAAGGTATAGCATAAATATATCCCGATCTGATTATTTTCGACAA  
CTTGTA

>Ref\_dvir\_463

ACACGATTCGGATGTTTAGTCGCTTTGCAAATTTACATTTATTAATATGCTCTTTCACGTCTGAAACTAAA  
TTTGGCCAATAATAATATAGTCGTAATCTCTCTAGTGTCTTATTCATTCCACAATGCGACGCTAAGGGATC  
ATCATGAGCTAATTTTAAAGCATGGGGTACCAACTTCCAAACATGTTATCGGCAACTCTGTCTCCTGAGGC  
ATGCTCGGACCTTCGATATATAAAGCCATCGATAACTTTGACGTCCGGCATTGAGTCAGATTCTGCAAAA  
CTTTAGACTTCAACAAGTCATAACCCTGGGATTTAAAATATGGGAGACTGCATATCAATAAAGTCATCGAC  
ATCTAAAGCCGATAAATCCTCCGTGTGAGTACGGGATAAAGCATCTGGTACAATATTCTTACTGCCCTTCC  
GATGTTGTATAGAAAATGTATATCCTTGAAGCTTGAGAGCCCATCGAGCTAGACGACTACTGAGATCTGC  
TTGATTCATGAGCCATTTAAGGGATGCGTGGTTCGGTAATACCAGTAAACGGATGGCCTTCGACGTAAGCT  
CGAAACTTGGATGCTTAAAATTGCTGCTAAAGTAGGTGTATGCACACAGGGGCTTGCACATTTTCAGTTTTA  
AGCGCCTGGAAAGCTTGCTCTGCCGCTTCTGACCATTCAAACCTTTTTTGAGTTGTCAGGGCGTCAGTCAAT  
GGCGAAACTATAGAAGTGTAATTTCGAATGAACTTATGGTACCACCCAGTCATACCGAGAAAGCGACGCA  
ATTGTTTAAGCGAGCGAGGCGCTGGATATTCGGTAATGGCAGTTATCTTATCAGCATTTCATCCGAATAATA  
CCCTGACCAACAACATGACCATGATAATTAACCTCCTTTAGACAAAACCTTGCTTTTTTTTCAAGGTTAATTG  
TCAACCCGGCATCCTTTATTTTTTCCCGCTAGTTCACTTAACACGGCAAGATGACGGTCAATGTATCAGAC  
ACTATAAGAAGATCATCTAAATATATAAACACTTCATTTCTTAAGTAAGCTGGAATTATCCTGTCCATCAA  
TTTGGACATCGTAGCAGGGGCGTTAGACAAACCAAATGGCATTACCGTGTATTGGTAAAGGGGTCTACCT  
GGTACTACAAACGCTGTTTTGTACGAGAACTGGGTTCTAAGGGTATCTGCCAATAAGCGTCTTTTAAGTC  
GAGACTGGTAATATATTCAGCCTTAGGAAGACGACTAATAATTCCATCAATTAGGGGCATCGGATAAGCA  
TCCTTTTCGAGTAACCTCGTTAACTTTTCTGCAATCAATACAGAGACGAACCTTTTCCGTTTACAAACGAG  
CACTACTGGGGAAGACCAAGAACTCTCCGATTGTTCAATAACGCCAAGGGAAAGCATAACGATCAATTTCT  
TTGAACATTAATTTCTCCCTTGACAGGAGATACGGAATGTAATTGCGTTACGTACATCTATGACATGAGACA  
GTTAGATGGTTTTTCTAACTCTTTTTCCGCAAATGAAGGAAATAGCTTCACACTTTCTGGCAAGACGTTG  
CTGTTTGTGTGCAGTTAAAGCTCGCAGCGAATCCTCAATGGCCTTAACAAACAAGGAGGAAACAGCTCAA  
ACGTTGACCAAAGGTCTAGGCCAAATAAAGCGGTGGAATAAGAGAAGGGACTATATAAAAAGTAATTCG  
TTTAACCTTTCCACCATAATAAATTTCTGTGCGTAACCGTTTCAATATTTATTGGGTTTTTCCATCGGCGG  
TTTTACCTGTGAAGTAATCGGTTTATACAGTACTTTTGTATTCAACAATTCCACAGCGAAACTACCACCA  
AAACAACCTTTTCGACGCACCGGTATCCAATAATCCTGTAACAGTTTTTCCCAATACGGTTACTTCAGCGTA  
AGGCCTTGAATCGGTACACACGATCGCTGACACGAGAGCTTGTTTCTCGATCTTACATCGCTTAAAAAATT  
TATTCGACGTAATCGCGCTCGTAATATCTTGCGATTTACAGAAGTATTTTTATTAACAGATTGAGATTGCA  
AACGAGTATATAAGGTAAATTCTGGGTAAATGACAAGTCAGGTAAAGATTGATTAGAGGATTCTAATTA  
TCCCTCTAGTCGGTATTTGTTGCCCTGGATGCAACTGGTTTGCCTGTACCGGTCAATGGTACACGAGACAG  
GTAGTTTTTTGGCACATTGTTACACTTGGTACAAGTTGGCTTGTAAGTGTTTGTCTGACCACAGCCATAGA  
AAAACACTTTGCGTTCGGCGACACAATCTTGATACCGATGGTTCCAGCAGATTAGACTGATGGCTGATAC  
ATCATTATCGAGAAGGTCTATCGCATCGGACTCTGCTTCGCTTTCAGTTTGTACTTCTATAGCGTGCAATG  
AGGGACGAGGCGCAGGGCGGGGTGCAAACACTCGAGCTTTAGAAATTGACTGAATAAAACCTTCCCGCCT  
TTGCACTAAATGTCTAAGTTGCGCGATAGAATGTATGGGCTCATAAAGAAGCTCGTGCTGAATTTCTAGCA

GCAAATTAGAGCGCAACGATTCTAGCAAGGAGGAATTCGATAAGGGTAGAGACAGTTTGTCTGTTCAATAT  
AATAATTGCATCGTAAAGTCATCGAAAGACTCACCTCTTTTTGTTTACGACGATCAATTGCCGCACGTA  
TGTC AACATCAAGTCGCTCTTCTTTGAACTTCTTCTGAGCACGTAAAGCACACATAATTCCGACCATAAGA  
TAATAGGGACACTCTTATGGTAGCGCCAGAAGAAATCGTTAGCGATGCCTTCAAATAGATGGCTTATATG  
ACGAGCCAACAACCTCATTATTTCCATCGAATGTCTCGGCAGTTAACGCCTCGACGCGATAGATAAACTCAT  
CTATACCCATGCCCAATCGACCAGAAAATCTAAGTTTCCAGTTACTGATTATTTGGCTAAGTCGGTCTGGA  
CGAAGTTTTCTAACATTGGAGAGCTCCTAGTTCTAGACTCGTTTCGTATAGAATTAGCCGGTCAGGGCTG  
AGGATGATCGACAATACTCATGTTTCGAAGTTGGTTGCTGAGCTGTGGAGCTGCCTAGCTGTGCTGTAAAA  
GCAGACAAAAGATTTTGGAATCCTGACTGTAAAGTTTGGGTCAGGGAGGCTGTTTGTCTTTCAGTGGCTGC  
TGCCATTGAATCAGAAATACACGAGAGCATGCATCTGGCTCGGCTGCCAAAGGCGGAACACTTGGCGGAC  
GAGGATTCTTCGACATGGTGCCTTGGGACAAAATCTCTTCTGGGGGGCCTTGACTTCGGGTTCCAATTGGC  
ATAGTAACTATCGTCGGTTGCTTTGCGAGGGCGTCATCTACCACACATGGGTTAGACGGTGAAATTGTTGT  
TTTGCAAACAGGGCAAATATTTTTCTTTACTACTCTAATATTATAGCATGCACGATGGAATGTGTGCTCGC  
GACTGGTAGCTACTAATTAGAAAACCTCAATCGTTTTAAGTCAAATATAGCGCAGTTCCTTATTAATCGAAG  
CAGCTGCTAAGTTTTTCGCAACTGCGATGTATTAACATTTCTGACCTACGCTTAAAATAAAAATACTAACAAG  
AATTAAAATACAAAAAAAAGGTGCAAAATCGATTAAACAGATCGAAAATATAGAACAATATTTTCATAAAA  
ATGTGTTGATGCCATGCAGTCGTTTTTCATGAAAGGTTATAATCTGCATCAGCTTCAAAACTGATCAACTAA  
TACAATGAAGGGTATAGGGATGAGAAAACAAAAATTTAATAATTAAGCGGCAAGTGCCAGTTTCTATATC  
AAAGAACACTGGGACTCCCAGCAGTAA

>9\_rnd-1\_family-312\_\_LTR\_\_Gypsy  
TATATAAGTTAAGCGGAGTCAACGAACGGTTGGCCAGAATATGACTCCGACCACAATTGCTGAATAAGCA  
TTGGGCCCGGATGTCGTTGCATAGCCGGCAGACACAGCATATTTGCGTGGCCGCTATGAACGAAGAAATAA  
NTTAAGAATCATATTCTGTTAGCTTTAAGCCCTAAGAATTGTATCGCATGTTTTTAGTTCTGAAATAAACG  
TCGTTAGCTCAACACGTCCGTACTCGGGCACCAAGTCGTCAGCGTAAACATAATTGCCAAACGGGCAAC  
AAATAAATATCACTTAATCAATACACTCAAAAGACTCATAATTGGCGCCCAACTAGTGGTAGTTACGATT  
ACCCACGCGATTGCAAAGAAAAAAATTCTTACAAAGTGAACATTAAGTCGCGGTCACACCAACAGTGCCG  
CGCAGTGAACATTACAAAAATAAAATAATAAAAAATAATAAGCTAATCACTAATAATAATAATAGTGACA  
GTGAGTTAACAAATGCAGTTGCGCAGTGAACACTACAACAAGAAGCAATAAGCTGCAGTTACAGTGAATT  
AGCGATCATAATCTCGTGATTACAAAGGTGCGCTCAAGCGCAGTGCGATTTACATATATTTTTACACCGA  
AGCCGCTGGAGCTCTTCGGGCAGCGGAGACTGCGGCGAAGGGAGCGACTACGAATAACAAGTGCGTGAC  
TGCGGCGTTGGACCCGCAAACGTGGCTGGTGTAGTGAATAAAATAAATCATAAAAAATCATGTAAGTGGGC  
ACTTTAGCCAAATCTGTTATTAATCTGATCGAATAAAAAAAAAAAAAAAAAACAAAAGAAACAAAGAGA  
GGAGAAATCTTGCATGCGTTATATTTTGCAACAAATCATCTGCTAGAGTAAGAACAAGTTTTTGAGAA  
TTCGATTTGACAGCAGTAAACAAATTTTGTAATAAATAAAAAAAAAAATTACTTTGTGTTACTTTTTATGCCAC  
TCTAAAAAAATTGTGCTGCAACGGCACATACTTTCTTGCTTATGCGCTTCTCGTGGTTCAGAGCTGAGGCG  
TAATTTCGACCCATCTTTCGACTTTCTGTTTTGTTTTGCGTCCGCTAGACCGCGCGTGCAATTTATTTGTTTT  
GCTTTNAATGCCCATGAAATCGTCTTTCGGTCAGTATAGGACCCCGCAAGAACTCTAGCGACTCGGATTCT  
GACTGTGACAACCGCATCAGAATCCCGGCTCCACGACTTGCCCCCTACAGTCCCCCAACTTCGAACAAAA  
TGGATCCAGAGCAACTTAGAGAGATAATTCAAACGGCCATAAGCAATGCCCTAACAGAACAAGCCAATG  
CAAACCAGCAAAGAGAGCAGCTATTAGTGACAGAGAATTAATGAATTATCCGAACAAATGGCAGCAGCAA  
ACGTTGCTGCCCCACAAGTAGTAGCGTATGCTGCTATTGAGATTAGAAATGACATTCGCTGCGACGAGCC  
ACTAGACGCCGTCAAATGCTTACCTGAGTTTGCAGGAATACAGGAATCTTTATGTTTCTTGGAGGCAAGCG  
GCATTAGCCGCCTACCACATTTTCAAGCCATATAATGGCAGTTCTCGGCACTATCAGGCCGTTATAATTAT  
AGGAAGCAAAATAAGGGGGCCCCGCGGATGCGGTGCTGGCCTCATTTGGCACTGTGATAAATTTGCGATGC  
GATAACAAATCGCCTTGATTTACATACAGTGACAAAAGGCCGATCCATGTAATTGAACAAGAGTTAGGC  
ACCTTGAGGCAGGGCGGCTTGCCCCCTACTCCAATATTTTGACGAAGTGAGAGAAAAAACTAACCCCTACTGA  
CCAACAAGGTCAATATGTCTTACGAGCCCGTTATGGCAAAGGTCTTTGTGAGAAGTTCGGTGACGACGC  
GTTGCGCGTTTTTCGTATCGNGCTTAGGCGCAATCTCACGGATGTGCTCTTCGCAGCCAAGCCTAGAGATC  
TGCCCTTCGGCACTGGCGCTTGCTCAGGAGGTGGAGTCAAACCACGAAAGATATGCTTTCGCGGCTAATTTT  
GCCAAAAGCCAAGAAGAAAAAGAGCGTAGGCCGAATACANAGACACAGGGCCGACGGCAAGATAGACA  
TTCTGAGCCNCAGACAAATGGCGCAAAAAACCCTCATTTCAACAAACAGCAGAAACAACAGGGTCAGTC  
CGATCAACGAAGTGGTCGGCAGCAAAACAAATGGTGGACAGGAACCCATGGAGGTAGATCCTTCATTTTC  
AAGGATCCTCCAACCCACACAGGCACCGGGGTATCTGAATAGAAAACAGGCAACATCTGATCACACGGG  
CTTTCAAAAAGGCAACAAAGGGCGAATCATGTAACGCAGGACGCGGAACAAGGATCGCGAACGTATGCT

AATGCCGCCTCTAGCGCAGAGGGCGCAAATTGAGGATGACGTGAGCGCTAGCTNTGATTTCAGATGCTGTTA  
ATTTTTTAGGGGTAGATCCCTGTTACCCGTCATCGGGCGAAGAGTAGCAGGGGGCCGATATGAAATTCCTC  
ATAGACACGGGCGCGTCTAAAACTTTATCAGACCACATGAAGGGTTAAAAGGCGTCCGACCAGTAGATT  
GTCCATTCACAATCCACTCGATTCATGGTACAACCTAGAATCACGCAAAAATGTTTTGTCTCAATGTTCAAC  
ATAAAGGCAACATTTTTTCTTTATCGGACCTGTCAACTTTCGATGGAATAATAGGCCTCGACCTGTTAAC  
ACAGGCAGGGGCATCGCTTTGCTTAGCGTCAGGTCAGCTTAAATGGGGTTCAGAAATTGAACAAATTTCT  
TTTCACGCATGCACTAATGTCAATTTCACTAACGTAGATTGCTCAGATGCACCTCCTTTAGTAAAGAACAA  
ATTCCTGAAACTGCTAAAGGACAGGAAAAGGGCCTTTGCAGNNCCCAATGAGGCCTTACCATAACANTACG  
TCGGTGGTGGCCACTATAANAACAATAAATGAGGAACCCAAAAGCTTTACCCATATCCTATGGGGGGCGGC  
TGACTTCGTCAATAAAGAGATTCAAANCCTGCTGAAAAATGGCGTCATACAGAAATCAGTATCTCCCTAC  
AATAATCCTATTTGGGTGTGGATAAAAAAGGTACAGATGAGGCGGGTAATCGAAACATGCGATTAGTAA  
TGGACTTTCCCAAACCTAACGAGGTAACGATACCCGATAAATATCCCATGCCAAATATTTCAATGATATTG  
GGAAACTGGGGAAAAGCGAAATTTTTCTCNACGTTGGACCTCAAGTCTGGCTACCATCAAATCATGCTCG  
CAGAANGCGATCGTGAGAAAACCTCCTTCTCAGTAAATGGGGGAGTATGAGTTTCGAAGACTCCCGTTTCG  
GTCTGAAAAATGCAGCCAGCATCTTTCAGNGGACCATTGACGATATCTTGCGGGAGCAGATCGGCAAATT  
TTGCTATGTCTACGTGGATGACGTGATNATCTTCTCTGAAGATGAAGAGTCACATGTCAAACACGTAGACT  
GGGTCCTGAAGAGNTTATATGAGGCAAATATGAGGGGTGTCAGTAGAAAAATCACGCTTCTTTAAGAAAA  
GTGTGAACTTCCTTGNGCTTATAGTCACTTGCAACGGCGCGACAACAGACCCGGAAAAGGTGAAAGCCAT  
ACAGGACTTCCCAGAGCCGAAAACGNTTTTCGAAGCCAGGTCATTTCTGGGTCTCGCAAGTTATTATAGAT  
GTTTCATAAAAGACTTCGCAGCAATAGCAAGGCCTATTTTCGGAAATTCTAAAAGGGGAAAATGGAACAAT  
CAGTAGGCATAGATCGCGGAACATTCAGGTGCAGT

>9\_rnd-6\_family-1385\_\_LTR\_\_Pao  
ATAAATCGAATATCCGTGCGATTTTTCTTAAAAATAACAATTTATACAAATAATTCTATGACAAAAAACCT  
TCCATTGAGCTGCGTTTAGAATAAACGTACTTCTTCTCGAGCTCAACAANTAATAAGCAATAAGCATNTTT  
TTTTTGCGCGATCCGTTTCCACTACGCGGCCCGCCTTGTA AAAAGAGAATTAATCCTTTTCTCTGGTGTTC  
ATAAAGAAATAATTAGATTTTTTCTCAAGTAAAGGAAGCTAAATAAGCATCAATTTAGTAAATTATTAGT  
AAAATAATTAATTTAACAAAATTTTCCGATTTTCGTTGGACTCAATAGTGAACACCATTTCGGTCATTCCAT  
TTATTCTGATATCTCGATTCCATCGTTCTGTGCCATTTCTCATTCCGTTTTCGCTCGGCTGATTCAANTTAT  
TTGTATTTGATCACATCTCACCCGGTTACTACAATTTTTGGCTCTGTGAAGAGCCTAGTATGCCAATCGGT  
GGTGATCAAAACAGCCANAAACGACTCACAGCACCGTCCGNTAAGGAGTCAAAGCGACCTTTAACCTCAC  
CTAGAGCAGTTTTTCGGGAAACTCAAGGTTCGAGGGTACCAGCACAAACCGTCCGCAAGNCTGTGAGTCCGA  
TTCCAACAAGATACGACTACGCAAAAGATGCAGAAGTCAAGCGAAATGGCACTGAACGACTTCGTTTCGA  
TAACTGACCGACTAGGCCAGTTTGAAGTGAAGATCAATGACGCAGCGGACAGTGACGTGTCAGTGTTCAC  
TCTCCAAGTCCGACGAGATCAGATTAAGACTTTAATGGGAAAAGGTAGAACGCGAGTACGAGTTATGTTT  
CAAAGCTCTCAACCAAGGCGCTTGCAGCAGCAGTGACCTGGTGGCTATGCAAGCTAAATATGATTACTCG  
TACTCCGTTTACGAGCGATGTGCGGCTCAACTAAGTGAAAAAATAGAAAGAGCCANGGCTTTAAATAGAC  
AAGCTGAGCAANCCCCCTCCAACCTTCTCCATGTCCAGGGGTTGCAGTCTCCCGCCATGCGACACTGAAGTT  
TTCAGTGGGGATTACCTACGCTGGCCTACTTTCCGAGACTTGTTTACAGCGGTTTATATTAACAATCCAAG  
ATTGACGCCGGTGGA AAAATTTGTTCCACCTAAATTCCAAAACAGCGGCGAAGCTAGGGCAATTGTCTCC  
AAGTCCCCGCTCACGAATGACGGCTTTCAGTCAGCGTGGGCGAGCCTGACGGAGAGATTTGAGAATAAGC  
GACTATTAGTCAATAGTCAATTGAAAATTCTTTTCAATCTCCCCTCAGCAACACAAGAGTCTGGAGCCGCC  
CTTAAAGAGCTTCAGGGCACAATCCAGGGATGTTTAACGGCTCTCGACTTGTCAGGGTGAGCACCGAAA  
ATTGGGATTGTCTGCTTATTTTCTTGCTCCTCTAAATTGCCTAAGCTCACGCTGTCGTTATGGGAACAAT  
CGTCCACGATAAGGCAGAGATACCTCAATGGTCCGAGATGAATTCATTTCTGATCGACCGATATCGCAC  
CTTGGAGGCGATAGAGGATGTACGACCTACCGCACATACGCCACCCAGTCCAAACCCACAAGAAAAGA  
GTCCAACCACCTGAGAACCTTCGAAGCAACAGTGACTACAAAGTCACAACACTGCAAATTGTGTCAGAAG  
GAAAACCATCCCGTGCGTCTATGCCACGTTTTCTACAAATGTCCGTACCCGAGAGAGTTTCCGTCATCAA  
GCAACAAAAGTTGTGCTTAAACTGCTTCGCCAGACAGCACCAGTTGAAGGACTGCACCAGCGCGCATAGT  
TGTTTCACGTGCAAGGGACGTCACAACACGCTGCTCCACCGTGACAGACCCAGGTGCCCTCAGCTTCCA  
CAACACCAGTAGTTTTGAACCTCCTTCGTCTATACAGTCCACTTCTACTTCAACCNAAAGCTACCGTTCAA  
AACTACTTTTCCGCAAACTCACATGGTGTTCCTCGGCGCGGCTGTCATCCAAGTGTGTCAATTTGGGCAC  
AAAGTATACAGCTCGGGCACTAATCGACTCTGGGTCNGAAGCGACCTTTATTTTCAGAGCGATTGTTCAA  
AGGGTTAAACTTCCNTATCAACCCGTCGACGCACAGGTCTCCGGTTTGAATCAAGCTATTTTCGGCTCAGCC  
CCAAAACCTCTGCCATTTTAATATCGGCTCTCCGATAAAGCCCNGGGTTCATATTGAAACCTCGGCTTATG

TTCTTCCAAAGCTAGCAGGCAATTTGCCCTCCTACACCATCCCCCAAACGCTTTGGAAGAACTTCCAAAA  
TTACACTTGGCCGATCCCTCTTTCTATAGGAGCTCACAGATAGACGTGCTTCTCGGGCGCCGATATCCTCCC  
ATCCATATTGTTAGGTGGCTCCTATCCCAACATATGTGGCACTCTCCTTGGTCAAGAAACGATTTTCGGCT  
GGATCCTTACAGGCCCGTTTCTAAGACCAGTGCCAAATCGGTGCGATCCTTTTCGACTCAAGTCTCGCTG  
AATCCAAATGCGAGCTTGGATAAACTGCTCACAAAATTTTGGGAGGTGGAGGATATTCCAGTAAAGCTGG  
AAAAGGAATCCGACCTGTTTTGTGAGCGCAACTTCCAAAAACCACTAAAAGGGATAAAAACGGCAGATA  
CTTGGTCACACTACCATTCAAGAATTCCGATCACATCCAGTTAGGCCATTCAAGGTCCATCGCACTAGCTC  
AATTTCTACGAAATGAGAATCGTCTGGCAAAAAATGCCCCCTTAAGGAGCAGTACGATGCGGTGATCCAG  
GAATATCTGGACTTAGGTCACATGCGACAAGTCCCTCCAAGCAATGGTTTCGGATAACTTTTATCTACCACA  
CCATGCTGTTTACAAAGCCTGACAGCACCAACGACCAAGCTCCGCGTAGTATTTAACGCCTCCCACCCGTCAT  
CGAATGGTAAAGGTCTGAACGATGTGCTACATGCAGGGCCCGTTCTGCAATCCGACTTAACCATTCAAAT  
TCTAAGATGGCGCTTCTTCCGATATGTCTTCAATGCCGATATCACGAAAATGTATCGGCAGATACTTGTGC  
ATCCCAAACACACGCCCTATCAGAGAATTCTGTTCCGAACAAAGGACAACGAGCTTCGTGACTTCGAACT  
CAGCACAGTACGTTTGGAGTTAACTGTGCCCTTTTTTGGCAATCCGGGTACTACATCAGTTATCTGATGA  
CGTTCGTTTCGCTCTATCCCTTAGCAAGTCACATTATCGCAAACAATATGTATGTGACGATGTACTAGCGG  
GAGCCCATTTCCAAATCAACGGCAGATCAAGCAATTGCAGAACTCCGCAAAGCCCTTTGAATCTGCCGGGT  
TCCCCTTGCGAAAATGGACATCCAATGAAAAGGACTTGCTAAAAGCGATTCCCAAGGACCACTTGCTTCG  
CGCCGACTTCTTAGAGATCGAAGAAGCCTGTTTCGGCAAAGACTCTCGGGATCAGATGGAAAGCTGACACC  
GATGAGTTCTTTTTCGCTCCATCCGAGCTAACAACCAAACAGTCCGTCTCCAAGCGTGAAGTCCTTTCACA  
GATTGCCAAACTGTTTCGATCCAGCAGGTTGGCTGGGTCCAGTCATTATTCAGGCAAAAATATTCATGCAG  
GAGATCTGGCTCCAAGAACTGGGCTGGGACGATCCGCTACCTGAGAGTCTTCTCAGTAAGTGGAATTTAT  
TTCTGCAAGAGTATCCGGGCCTCAGTGCGA

>160\_rnd-5\_family-9448\_\_LTR\_\_Pao  
GTACGCAATAGAGTCCCGGGTATTGCCAATTCTCCCTTGCTGAACATCACTGCCAGCCAAGATGTCCTCAG  
CCTCCCTTACCTTCATCGTTTGAGTGAACGTAATTTGGAGGTGATACAGCAATTCAAGAAAGACGCCGGA  
ACTGATCAAGCTTATCGTGTGGCATTTCATCATTGGAGCCATATGCTGTGCTTTAATCTGCATTGGCCTCACT  
CTTTGGTGGATCATCGACGCAAAGAAGTCTGCGAAGCAGTTACGAGAAGTCGTCGCCGGGATTGGGTTCGG  
CCGAGGACGGCCTTATAATTGAAGGGGGAGTAGTTACCACATAACACTTAATATAGGATATTTTCATAAGT  
TATGATCAACCCTCGCTATCGCGTGCTTCATAAGTTAAGGAACAGCCCCCGCAATTGCGCACTGCATACT  
TTGTATCAGCGCGCAATAGCTGCAATGGTCAGCGGCGGTAACCGGACACTTTTGTGTTGCTGCAAGAGTTTC  
CGTTATTGCCTAAGATTTTGTGAGTCGGCTTGCCGACCAAGACATTGTGGCGTGATGCGAGTTTTGGCTT  
AGCTTAAGTAAAATTTTCTGTGCATTAAGTTTTTTCAGTTTTGTATTTGACGTTTAAGAATAAACTTGCCTA  
CTCCGGCACGCTGCCGTAAATATTATTTGTTATATATTACAAAAACATTGCTGAGCCACAAGGCCAGTAAT  
TAGCAAAGAGAGTGAAGTCAAACCTCTCCACCATAATCGTCCTAAATATCACTGGACTAGACATCGCTGGA  
CGAGAGACGGATCAACCATCGCCTCATTGGACCAGCAGATCGACTTAATTTATACATGATTCTATTAGCTA  
ACAGGTATGTTGAACCAAAGAGATTTTCTCAAAAAGCAGAATTGTGATATAGATTTTTATTGATTTATAGA  
CTCGTACTGTGCCAGCATTAGAAGAACCTATGTTACACTTCAACTCTTAAAGTTCATATAGACGGGCAGG  
CGGATGGACAGGCAAGCGGACATGTCTACATCGATTTCGGCTAAAAAATAGGTTATTATACTGTGTTTGTA  
GCATTACTTATTTGTGTGCCACATTGGTAAACTTGTTTAAATAACTGAGTAAATGACCGATTCTCGAACGC  
GAACAAAACGAAGTCGACTATGGACTAGTCGATAAAAAATATGCCTGGTCCCATTCTTTTACTCTAGTTGTA  
CAGTCAATATGTTCTATGGTTAGCGTTTGTATCAGTTGGTTGCCAGTTATTGAGATTGGTGTATTTGTGCAA  
CTTGAGAATATTTTTGTTCAAATCTTGTCAAATTTGCATTGGACAGGCAGGCAACAAACAAAAAAAAC  
TGAATTTGTGCGCAATGTTGCTTGTGCGGACACATACACATGCATAGCCAAAGCAGCTTCCCGTAGTGGG  
AGCGAACGAAAAACACATAAATCAAATGAATTTCTTACTCTCTTGCTATTTGAACAAATGACCAAGTCTC  
GGATCCGAACAAAAACCAAGTCGACTTTGGACCAGAAATCTAAAAAATGAATGGCCACAAGCATTTGTTT  
TATCTGTCCCATCTATATGTTGTACGGCAGTGGTAATACCCAACCTAAATATTTAAGTTTCATTTAGCTAAT  
TGTTGAAAATATAATATAAGCATGTAATATTCACGTATTTATATGAATGCGATGGGGCGCAACATTTTATG  
TTATTTGTATAGTATCTGCTTTTGGTACTAAAAATCCTTTATAAGTTTTGTTTTTATTGCCTATATTATTCGG  
CAATCGATTGAGTGTATCATTCAAAAGTGTTGTTATCTTCATCAATGTCTGATCCGTTTTGTGTGATTTCCT  
GAATAATTGATTTGTATATTTTCTTTTTCTTCTGATGTGCCCTTCTATAATTATATTGTGGTCCGGATTTCTA  
TTTCATATCGTTTAATGTCTATTTGTCTGATATTTGTAAATTATATGCCCTGAACCCATTGAAGATGGTTAAA  
ATGGATAGAATTTATTTATGCAACTGTATGTATCCGGCAGAAGGTATTTTCTCCTCTCGACCTCTTAACGT  
ATATATTTTTTTTAAATCAGCATCAGAAGCCGAGTCCATCTACCCAAGTCAGTATGTCCGTCCATTCGTCCGT  
ATATCCGTCCGTAATTATAAACGTAATAATTTTCAGAAGCCTTTTGATTTTTTAACTAATCCTTAGGTATTAA

GCTAGCTTCTTCTGTAGCTTCTTGTATAGCATATACAGATTAAATAGTGTTCGGCTCAGCAGCAAAAAAAT  
AAACTTGTATTATGTTAGAATAACATTTTCAGTTACATATTGCCCTGCGAGGCAAGCAATGTCACTATTTTG  
TTCGCTTTGCGCTCATCGCAGTTTCTGTTATCGCGCTTTNTTACCTTTTGCACCTTTGTCTTAAGCGGCTAGC  
GCATCAATGCTAGCGACGCCGCAATGCACTCTTGTCTCGTATGTTTCGCTATATCGGATCTCTTATCGATCG  
CTTCGCTAAAAATTGTAAATTTTCGCATATTGTCAATACGCTCGCTATAAGCATATAAATAAANCAACCCG  
TTTGCATGAACCTATAAGAAAAAGCGGAATTTTATAACATCCTTAACCTTCTCGCTATTAAGTGCTAATAA  
AAAAGCTTGTAGCCCAACATTTTGGTGACCCCGACGTGATTTCTTTTATTTAACATTATANTGTTGCATAA  
AATTATTTAAATTAATAATTGAGCTAGTTGTTACTAGTTTCGGCAGCAATTAATAACCGCTCTTATATACATA  
CATATGTACGAGCAAGTGTATGCGGTAAATTGCAGTAAAGATGACCCTCGCTATTTTTACTTGTGTTTTG  
ATTCGACTAACTGTTGCGCGCGCTTAAGAGTACAGTGCTGACAATAAGTCAACGGTCAACGAACCTTCGT  
GTGCAGTTTTANTTCGGTTTTCTTTTACCTTTTTTCGTTTNCCTTCGGTTGCCATGGAANGTTCTAGTGCTGAA  
TCGCTGGCCCAGCCTGCAAACAGGGTGTCAATTTTAAAGCGCAAGGTGGCGTCCTCGTATGAGCGGTTGC  
AGGCGCTTCAATCTAGCCTCAACCAAACGCCCTTGCCAATAATGATGAAATTGCATTGTGGTGCTGCTC  
AAGCGGATTGAAAAAATGGAATCTGCATTGCAAGACGCTCAAAACAAATTTGAAGAACTAGACTTTGACG  
AAATCGGCAGTGAGTTACGCGAGGCTTTTGATGAGCTTTCAGTAACTTTGGAGACTTCGGTGCGGTTTGAA  
ATCGCTAAGCGCAGTAGAGCATTGCCGTCCAGCTCCACATTTGTAAATGAGCCTATTGCTGCTGCGTCAAT  
GACTAGATCCAGAGCGTTACCGACCTNACCGGCCAATCAAATTGCCAACGTTTTCTGGAGGTTATACGGA  
GTGGTCAGATTTCTTTTCGATGTTCACTTNAATCGAAAATCATCCCGAACTCACAAACATTGAAAAA  
TGCAGCATTTCGCGCTCTGCTTGAAGGACTCTGCGCTGGATACAATTCGGTCATTGGAAATATCAGAGGCT  
AATTATTCCATAGCATTAAATTTATTACAAAAACGATTTGATAACCGTCGATTAGTATTTTCAGGCACACAT  
CGTTGAACTGCTGGGGCTCAAGAAGGTAGAGAAAGGCTCCGCTGGCATGC

>160\_rnd-5\_family-9379\_\_LINE\_\_I-Jockey  
GCTCGTTGCATTTCGGACGTGCGCGCTTGACAAGTTATTTTCGCAAGTGATCAACACAATATCTTTACCTCC  
TTATCTCTTTGTGCTCTTCTTGCGCTATTTTTAGCCACTGCTTGCGGTGGCGGCAGCTTATTGCGGTACTGT  
ACCTAAGATAAGCCAGACTTAAACGGTGCTAAGTTTGCCCTCGCCCTGCGCNCTGCGCAAGCGAGAGGT  
TGGTTCCGTTAATTCTTATCTTTTGATCTGGAAAAGTGACGACAATTGCATTATTTGACTCTAAATAATA  
ACAATTGACGNTATGGACAATAACTCATNGAATCAGTCGCTACCTAGTAATAGGCAAGCTGTACTGGAGG  
AGATGAGAAAAGCAGCAAGGGTAAGCCCTGAACTCTACGCTCTCAAATCCGCGGTAGCGTAGCATCCAT  
TTCTGCGGAAAACAACAGCTTATTGCCAAATCGGGTGATAACTGGCCCGACGGTAACAACAAGCACTGNT  
ACCAGCGTTACCTGCACTATCTCTATGTGCGCAAGCAAGTTTGACATCTACATCTACGTATACTGTAGCGGC  
AACTGTGGGGCCTAACATTTCTCTGACTACGTCACTTGACAACACATTGGGTGAAATCTTGTGTCAGCAGCAA  
CTCGTAAGACGAAGTGCTCGTTTCAAGACCGCGGCCTGCCTGCTAGTAAAAAACATAAAGGAGTTATAAA  
CACNTCTAAATCTATACAGAAAGCTAAGCCGAAGCCCGCTGAGCTGCACAAGGAAGTAGCCAAAGACAC  
GGCATCCACCTCGACTGCAGCAGCACTGAGTAAAAACCGTTTTGCAGCTCTGGACGAAGAAGCGGACAAC  
ATGATGGAGCAAGGATTGTGAGAAAGCGATTCTGACGACGAAGATGAAGCTCGTGCTGTTGGCAACGGA  
AACAAACAATCCTCAAAAACGCTCTCAAAGCCTCCAGCAATATGTGTACCACAAGTCAACAATCCCTCAG  
GCATGGAACAAGCACTAGACTCGTGCGTGGGTGCCAACAACCTATAGCATTTCGCACCTCTAAGTTCGGCGT  
ATCACGGATATACACCGCAAACCTCTGACGCTTTCCGAGCAGCTGTAAGACATTTGACAAAACCTTAAGTGT  
CAATTCTGGCACCATCAACTTAGGGAGGAAAAGCCTTACAGGGTTGTGCTCAAGGGCGTTAATGCCAACG  
TCCCCAAACCACAAATTGCGCAAGCTTTTACTGACCAGGGTTTCGAACTCTCAATATATATTGCCCAAGA  
AAGGCAGATTGGCGTAACGTTTCAGGTCAACGAGACAGACGATGAAGCGACGATCAACTACAAGACTAGG  
CAAAATCAATTTTTTGTCAATCTAAAACAAGGACCCGATGTGTCTAATGCTTTGAAAATTACACAACCTCGG  
CAGATACAGAGTCTCAGTGGAGCGTGCTCCTCGCAGAAAAGAAGTTCTACAATGTCTGAGATGCCACACC  
TTCGGTCATTCCAAAAATTATTGCCTCCGGGACCCAATCTGTGGCAAATGCGCTGGCTCTCATATGACTGG  
TTCTCTGCTTTGCACGAGTGAAAATTTCTGTGCGTCAACTGCGGTGGTGATCACGCGTCGACCGACAAAG  
ACTGCCCCGTGAGGATTGAGAAAAGCAAAAAAATGAAACCGATCCCAAGGCTCCCTGCTACTGGCAACAC  
TGCCAGGCCAAAATATAACCAAGGCCCNTCACGTGGCTTCATCCCGGCTGAGACTGTCAGATGCAGTATG  
TCTTACCGCGGCGGAATCTGGTCCAAATGCTGACAAGCATCTTCAGCGAGAANCAAACCTCACTGCCTGAC  
AAGAAATTGGATGCGCTGGAGAGCTCCATACGGGATCTCAACTCCAGAATGGACCAATTATTCAAGTTGG  
TTCAAGAGACTATGGAGGCTAACAAGGCCTTCCGAGAATTGGTCCAGGTTCTCATTTCAGTATCCAAAA  
ATGATGCAACCGATCATTAAAAATCGGATTGTGGAACGCACGGGGACTAGTTAGGGGCTCTGGAGAGCTCC  
GGCTGTTTCTCAGTGCAAATAATATAGATGTAATGTTTGTACAGAGACACACATGAAAGAGGGACAGCG  
TGTCTTCCTGCCAGGCTACTCCACCTACCATGCCTTCCACCCAGCGGTAACAGCAGAGGTGGCGCCACAG  
TCATTGTGCGCTCCAGCATGTGCCACATTCTCAGCCTCCCATCTCAACAAACAACATACAGCTAGCAAGA



GTGAATCTGCAGACATCGGAAGGGCCCGTCGCTCTAGCATCTTTGTATCTTCCTCCCAAAGAGCCTTGTA  
TAAAGCGGAATTTGCAGGTGGTGACTACAACGCCAAGCACTCATGGTGGGGCAACTCAACAAATTGCTCC  
AGAGGCAAAATATTGCAGGATGTAGTGGCGAATGATCGGTACCAAATTCTTGCAACGGGTGAGCCTACAT  
TCTACTCATCCAACTCCCTAGTGTCAACATCAGCGCTAGATTTTTTTGTCAATTAATGGATACGCAATGAGC  
AGGCTTAACGTGAAAACGCTTCATGAGCTCTCTTCGGATCACACACCACTTATAGCTGATTTACACGCCAC  
TCCGATAAGCAAGTCACAGCGCTCTTGTTTACTAGCACGCGGTGCTGATACAGAAATTTTCAGGGCCCATC  
TGGAGCAGCTGGTTGATCTAAATATGGAAATTCAAGACGCAGATGATATTGATAACGCAATCGATATTTT  
TATGAGCAAGCTGAAAGATGCTGCAACAAGAGCTGCTCCTAGGAATCAACAACATCTGCATGGAGATAG  
ATCGCCTCAGCTTCCTCCTATAATCGTTGAGCTCCTGCGTCTCAAGCGTAAAGTAAGAAAGGAGTATGCAA  
GAACAGGAGATGCCCCGAATCCAACAGATTCACAACAGGCTGGCTAATCGTCTTCACAAAGTTCTGGCTCG  
CAGGAAAAGAATTCAAATTGACAACATGTTGGAAAACCTTGGGTACCGATGTTTTCTACTAATTTCTCTCTGT  
GGAAAATTACTAAGAGATATAAGACGTTGGCAACACCGAAATCGGCTATTAGGGACCCCTCAGGGAGCTG  
GTGCCGCACTAGTCTTGACAAAACGGAAGTATTTGCAAACAATCTCGAGCAACGATTCAGGCCGCACTAC  
TTTGACCCCGAGAGTCACTGCAGGATAGTTGCGGAGGCATTGGAACACCCGTTTCAAATGGCTTTGCCTTC  
AGATACTGTGACACTGGACGAAGTGAAGCAGCTGGTGTCAAAGCTTAAACCCAATAAGGCCCCCTGGCGA  
AGACTTACTCGATAACAGAACCATAAGACTCCTACCAGATCAAGCACTGTTGTTTTTGGTGCTTATTTTCA  
ACAGCGTCCTACGTGTGGGATACTTTCCGAGAGCCTGGAAGTCGGCTAACATTATTATGATCCTCAAGCCT  
GGAAAGCAACCAACTGATGTGGACTCTTATAGGCCGATCAGCCTTCTTCCTTCACTGAGCAAAATAATGG  
AGAGGTTGATTCTAAACAGAATGCTGGATCTCGAGACTGTTACCCTTGCATCCCTAAATTTCAATTTGGA  
TTTCGCAAGCAGCATGGCACTCCAGAACAGCTGCATAGAGTTGTCAACTTTGCGCTAGAGGCCATAGAGA  
AGAAAGAGTATG

>9\_rnd-5\_family-1804\_\_RC\_\_Helitron

AAAAATCAAGCTGCATAGTAGCATTTTTGTTGTATGGCGTTACTCATCTTAGTGTTTATATTGTCTTTGATGT  
ATATATGTTCTTGATCAGAGCGACGAGCTGAATCGATTGAGACATATTCACCTCACCGTTTCTCTGTCTGG  
TGGTATGACATATACGTACTATATATATACATATGTGCAAATATTGATACATTTGCGTATATACGTACTAA  
TACTATTTAAGCCAAACTCTNCGACCAGGAAGAAATGTATAAATGATGTTTAATAATTATTAATATTATTA  
TTGAGAACATTATTAACCTTATTTACTTGAAGTTTTTAAAATAAAAATCATCATTTATTTTGGTGGTCTTGATT  
TCAAAACATAAATAGTGACGCGCCTTACGTCCAAAAAAGAGCACGGACATTTTGAAGCGGCGAANTGAC  
AAATTGAGAGGGCATGCTTTGCAGCAAATTTTTAAGTCATCGATTTTCGATTGTGCGCTGTAAAAAGTTTCA  
CTGAGAGCCCTAAAAANAATTGTCCCATGGAATTAAATTTTAAAATGGTAATCAAGGAAGGAGTCGGTTT  
TGACCCCATAAAGTATATATATTCTTGATTAGGACGGCAAGCTGAATCGACTAAGTAATATCCGCCTACCT  
GTTTTTCTGTCCGGCGGTATGTCATATGTATNATATAAGTTATGTTACATACATATATAAATTATATATGT  
TCAAAAATTGGTCAAAAATTACCTATACATGGAAGTCCTATCGTAAATCNTTTTTTAATCTATATAAACAA  
ATTAATAATATGTTGTTTTTATGTTTAATAATATTATTTAATTTAATAATATATATCTACACTTACGACCGAA  
GCGCGNATGCNTTNAGTTGTACANCCGTAATATGAACTATTATATTATTGATTGATAAATGATCTTTTG  
CATTCAAATGTCGCTGGAAGTGCGCGCAATGAAAATGTTTCAGTGAACTTTCAAAGGGAGCTTTTGAAAAA  
AGCGAATTCGCCTATTGTCAGGCGAGACAAAACGAAATTGCCATTCACCTCTCAACCAACCATCGATTTGT  
GCGGTCGTCGATTCTCGATTGCGATTACGATTCTAAGAATTTGCGTTTTCTTAGATTTAAAACAAATAAAA  
CTTAATATTCGTTTTAATAAGATCCAGTGCAACTGAAATTAACAATTCTTCGGTTATTTTCAGTGCTTTGAA  
GAATATTTAATGTAACAATCTATAATCGGTGGTTTGCCGCGNAAAATCGNCAATTATTCGCCGCCAGTGCT  
AGTGAACATTTGTGTGTGTATGTGTGCGTTGACTCGTCGTTAGACCTCACCTCCCCTTAGACTAACAACCT  
GTGTGTGTGCGTGTGTAAACATTTTGTGCAAGAGTGTGAGGCGCACTTGCTAGCGGTGGACCAATAATAC  
GTGAGTGTGGTGTTCGTGTAAGCGTTGTGACTCTGGCATTGCTTTGCAATATATTTTCTGGATGTTTGCAC  
TACACCTGTTGTACTGGATTTTTATCTAACTGGAAAAATCGCAAGTTTATTCGAAAAGCTTAGATAGTCTT  
TTTAAAAACTTATTGATTTATAATATTTTCCTTTTTCAATACATATTTATATATATTTAAATATAATAATAT  
ATATANAATATATATATATTCAAACCTAACAAATTAAATTATCAAATAAGTTAATATTATAATTATTTTCTTT  
TTCAGTATCTATCTTAAGTTTCGATTTCATATTTAATTATTCTTTGTTATCTTAACATAACTTTAATTTTCGAA  
ATATTTGGGAATAATTTCTTCAGTTTTTTAAAATGCCGCGCGCGTCTAAAAAATCCGCTAATCAAAGGCGT  
CAAGATGCCATTAATCGTAGTCGTGTCTACTACATAGAGAATACTGAAAGCGTTTGCCTTCGAAATTCTCA  
AGGTTTAGCTGACACTCGTGAGTGCAACGGTGATATTCGTGAAGTAGAGCGTAATACTGACGCCCCGGCC  
CGATCTAAAAGAAGAAGAAGTGCTCGATTTTCGACAGGATGAAAGGGATCTTGATGCAGCAGCTCGCGCA  
ACGCAAAGACAGGATGAGGATATGCGAGCTCTGGAGCAGACACAAAATACAGCAGACCATGCTGTTCCG  
CGACAAAATCTGGAGTACCGTACCCTAGAGCGTGAGCGCGATGCAGAAGCCCACGCTACAAGGAGACAG  
GACTTAGAAATTAGACTGCAAGAGCAGGAATTGAACACAGTGGAACACACTGTGCGTCGCCAAAACGTG

GAGTACCGCGAATCAGAACGCCAGCGAGATGCAGCAGCCCACGTTACAAGGCGACGGGATTTAGAAATN  
AGACTGCAAGAGCAGGAATTGAACACAGTGGAACACACTGTGCGTCGCCAAAACGTGGAGTACCGCGAA  
TCAGAACGCCAGCGAGATGCAGCAGCCCACGTTACAAGGCGACAGGACTTAGAANTNAGAGTGCAAGAG  
CGGGGAATTAAACACAGTGGAACACACTGTGCGTCGACAAAATGAAGAATATCGTGCATCTGAGCGTATA  
CGTGATGCTTCTGCTCATGTAGCGCGAAGACTGAATGTTAATAGTCGNGAGCTAGAGCAGGAAGCTAATA  
CAGTTCAACATAACATTCGTTCGNCAAAATGAAGCATATCGCACTGGAGAGCGTGAAAGAGACGTCTTAAA  
TCGGCGAAATGCTCGTCAAAAATATTATCGCAAGACGCAGAGAACAAGTCGTCAATTTCTCTCAAAGACGA  
GTTACTAGAAACCAGGCTCGTATAAGAGAGAACGAATTNCGAAATATGGCTGAAGCTCGAGTTATAAACT  
TTAGAAATAGTTTTCAAATCGTGCCATACAGTCAGCTCAGCAATCTCAGAGAAATAGAGATGCTAGAGA  
AGAAATGTCACCTGAACAGCGCGAGCAACAGCGTGACTTGCAAAGACAGCGTAGAGTTTTTTCTGCCAGA  
GATAAATACCTGGAAAATATTAAGAAAGGCCCTACAGAAATATGCATATCATGCGGAGGAACCTTGGTTTC  
CTTTCCAAGTAAAGCTTTTGAATAAAAATAAATGTATCGGCAAAGTTTNCAAACATGGATATTTCAAAGC  
ATTTTATCTGTCCAATAAGTTCCCAAGTCTATCTGAAGACTATTTGTTTTGCTCCACTTGTGCGCCGACACAT  
ATCGTCCGGCAAGATTCCGAGTCTCTGTCTGTCCGAGGGGTTCAACTTTCCTGAGATTCCAGACTGTCTTA  
AAGACTTAACGTGTCTTGAAGAGCGTTTAATTTTCGCCAAGAATCCCATTTATGCGGATAATTTCTCTTGGC  
TATGAGCGGCAATGTGCAGTTAGAGGAGCTGTGGTCAACGTACCAATTTCTGTTTCGGAAACTGTGACAG  
CTCTTCCGCGCACCTTTGAAAACAGTCATGTAGTACAAATTCATTTGAAGCGTAAGCTGGAATATGCGCAT  
AATTTTCATGACTGANACAATNAGGCCGGCTCGTGTGCTCGAAGCGTTGCGGTATTTAATAAACACAGAAT  
TATATCTTAAGCACAATATTTAGTTGCTTCCAACCTGGCTAGGTGTAAATGCTCACAATGAAGAAGTCCCT  
TTTGTGCTGATCCAGCTGATATAACAGCTGTGGATAGCCTTCTTCGCT

>9\_rnd-4\_family-1038\_\_LINE\_\_R1

CACACACACACACACACACACACACACACACACACACACACACACACACACACACACACACACACACAC  
ACACACACACACACACGCACACACACACACACACACAGGGCACACGAGTGAAAGTGAAAGTGAGTTGACGC  
GTCTCGACTGTCGCTCCGGCTGTTCTCTGTCTGCTGGGGCCGAGCTCCGGCAGGGAAAGCAAAGCGATGATG  
TGCAATCCATTGGCGAAGGGGCTGAGCACGTGGAGACCCACGCTCACATACGCGATTTCGCAAGCGGCGG  
ATGCCAGGGTGCGTCAAACCAAAGATGACTACATACGCACACGGAGAGACGCAGGTGGCACGACTGGCA  
CGACTGGTGGTACACCTGCAAGACTGTGGAGGTGAACACGAGAATGGAGCAAACCCGCGCACTCACCTG  
GATGACGGGGTGATGGCGAGGACTACCTGATGGTATATATCCAACCCTAAACCTGATCCAAGTAAGCAAG  
TTGAGCACTTTCTCAGCGAAACTATCATGGCGACATTGTTTATGCTCAAGCACATGAGCAAGACAAAAGC  
TCTGGACAGCTGGTTGGTTGTACAGTGCTGCCAACCGAAGTACATGCGTCAACGAAAAAAGCAATTACGC  
GCGAAAGTATGCCACGCTGTGTGGGTATACATGAGGACAAAGGAAGATATTGCATGCTTTTAGGCTTTTA  
CGTTTTACTCGCATTGCAGCTGAAGACTCGAGGCAAGAAATTGTACAGAAGGCCACGGATCCGACCAAGT  
CAACTCCTGCCGCATAGCGGTGTACTAAAAGGGGGCGCTGGCGACCGAGCTGGAGCGGTTAACTCCCATC  
TGTCAAACGCCAGTGAGAAACCATTGGCCACCGTTGGAGCCACAAATCAGCAGCGATGAGCGCCACAAC  
GGCAGCACGCCCCGTCAATGCAAGCAAGCAAACCTCCACCCCCACACTGAGCCCAGTAAAGTGTTGAAGCG  
ACCCACTGGACCCCCCTTACGTAACTGTAGAAATGGGCTGACGAGTCGGGCATTCTAGGACCTTAATAGG  
CAAGCTGACACCTTGTCGAAACGGCTCCTAGGCTAATGCTAGCCTCGCCCCCGTCCCGCTAAAACCTTGGC  
AGGCCTCGTAGAACGCTTATCGTATGTGCGCCATTCAGTTGGCCGTGCAGGCTCAGTTGATATTCCTGACT  
AGCACTGATCTGGCTCTGAACTCCGTCTCCATAAGGACCGGAGTCAACCCTCGCGTGGACCTCACTCCAT  
GGAAAGGCAACCACGGGATCGCGAAGGTGACTGCACAATACACACGACAACAACGGCTTCGAGTTGGGA  
CCCAATTAATCACAATGATGAACCGAAACAACAAAAGCACCACCCCACTAGGTGGACAAGAGGAAGAAG  
GAGTACGCNAGGCCGACCCGTTTCGCTAGGCGATCATGCCTGGCGAGCACGCCCCCGGCTACACCAGTAAG  
GGCCCCCTCAGCCCACTGCACCATGCAGGGAAATTGAAGAGAAAGAGACCCCGAAAAGGCTTAGGGACCC  
GGCCAGCCCTACGAACAAGCCACGGAGCACCCCGCCCAAGAAGAGCAAGGCAAATACCCAGGAGATCGA  
AGAGATTGGCTCGATACTGGACGAGCTACTGTTTCATGTATCATGGCAAGCAGCCAGCGATGAGGCACATA  
AACTTGGCCACTAAGAGCATGCTAGCGAGACTAAAAGAGCTGCAAGAAGTAGTCAAAGCGCAGCTCACG  
GAAAACCTACGCATGCGATGCAGCGAAGAGTCCCATAGCAGATGAGCCATGCTGAAGAAAGCGCCGGA  
AGCAATTCTAAATGCGACACGGCAACGCAGACGGAAGAAAGCGGTGCAGGCAGTAAACCACCGACAGCG  
GCGCAAAACCGACGAACGAGGTTACAGGAAAAATCAGATCTTGGCCCCAAGCAACCCAAGCCGGCACCA  
ACTCGCAAGCAGCAACGTTACAGCCGGCAGAGGGCAAGGTACCGACCCAAGCGCGAGAGGCAAAAACA  
CCGGTCAAAAATACCCGAGAGGTAATAAATAAATGGACTGAGGTGAAGGGCAAGCTCACCAGGCGGAAA  
CAGCCCAACCGACCGGATGCGATCCTGATCANGTGTACAGAGAGCATGCCATACGCAGATGTGCTCAAAA  
TGGTGAACACAGCTCCCGCACTGCAGGCGCTCAAAAATAATGTACAGGGCATCCGCAAATCAGCAGCAG  
GAGAACTGATCCTCAGGCTCCAGAAGCCATCGGACCCAGCTACCGACCAAGTTGCGTGTGGCAATCAGCAG

CGCACTGGCTGGAAAAGCTGCCGTTAGAACCTTGCAGGAAACGGTGCAAATGGAGGTTCTAGATATCGAT  
GAGTCCACGACAGCAGATGAGGTCCTCACAGCTCTCTTTGCCTCGGTGGAAGGAGACATACCAGTAGAAG  
CGACGCCCACTATGAGGGCGGCCTACGGAGGAACACAGATCGCATCGCTGGCCCTGCAACCGAGCCTAGC  
CACGAAACTGCTCGAAACCGGCAAGGTCCGCAAGAGCCAGCATCCGGTTGGAAAGGAGACGTGCTTTAA  
ATGCGCAGGTACTGGGCACAAGTCTGGACAGTGCACGCATGAGGCAAAGTGCATCCTCTGCACAAGAATG  
GGCACGGGCACTAACCAAGCCGCGCACTCAACTCTGAGCAGGAACTGCCCGGAGTATAAGAAGGCCTAC  
AAAGCGCTTTAGAAATGGTTAAGTTCCTGCAACTTAACCTTAAACCACTGCAGAGCAGCCCAGGATCTGC  
TCGCACAAACGACCCGGGAGACGAGAATTGATGTAGCCATCATTAGCGAACCGTATACACCCAAACATAT  
CGGAGTGTGGCACGAAAGCCTAGACGCTGGAGCAGCACTATGGAGCTGCGGACAGGCACCATAACCAGCT  
CACTCAACGGATGGCTCGCAAAGGGTTTGCTAGGGCAAATGTGGTTCGCATATACGTTTATAGCTGCTAC  
ATACCACCAAGCATACCCCTGGCAGAGTACACCAGCCATTATTGAAGACATCGCACAGGACGCGCACGGG  
AAAATCTCCAGTGATAATCGCCGGGGACTTCAACGCGTGGGGCCACAGAATGGGGCAGCAGCAGAACGAC  
ACCAAGGGGAACCATCCTGCTGGACATACTTGCCTCGCTAAATGTCTGTCTGCTGAACATCGGCACAAGA  
AGCACTTACAGCAAAGCGGGTCGCGAGTTCGATCATAGACCTGACGTTTGCCAGCCCAGACGTTGCCCGAG  
ACGCCAAATGGCATGTATCGGATGTATACCCACAGCGACCACTTTGCGGTGATAACGGACACCTACCA  
ACTTGGAAGCAGAGGCGCCAGTAGAAGGCTCCAACACACNNGGATACAAGATGGACACTATGGACCTGGA  
AAGACTCCTCCCTATGGTAGAAGGACTTGGCATAAGAGGCGACGCCAACAGCTCTGCTGACGCGATAGCA  
GAGACTATACCAACGCATGTGACGCTATACTGACAAAAGTTTCGCAAGGGTGGAAACTCCCCAATNCNGA  
CCGGCANCNCCGGCGGAACNTGGNCGNAGCCAAACCGGAAGTGCGCTCAAGGA

>9\_rnd-1\_family-346\_\_LTR\_\_Pao

TGCAAGCAGCCGTGTTAGGAACGAGGCTGATGGACACTGTCAAAAAGGAGCACGGTATAGCGATCAGCG  
ACGCTATACTATGGACTGACTCCAAAACCTGTGCTGCGTTGGATAGGCAGCACCCACCGTCGATATAAGCA  
GTTTCGTCGGAAATCGAGTGGGAGAAATTTTCGGAGTCAACAAAGGTTTCCCAATGGAGATGGGTACCTAC  
TGCTGAAAATGCAGCAGACGACGCAACGAGGCCGCATTGCCACGTAGACCTCAGCCAACGGTCACGATG  
GTTAGACGGGCCAACATTTTTGCGGCAGCCAGAAAGCAGCTGGCCGCAGTCCGAACCGGGCACGGAACA  
CTCATCCTACGAAGATGAAGAAGAGATGCCGAGTGAATTTGCCTTAGTTGCAGCAAATAGCTTTTTTCATTT  
CATTTACAGAGATTCTCTAGCTACAGTCGGCTGGTGAGGACGACGGCTTGGGTTTTAAGGTTACGCGCTGG  
AGCCGTGGACAGAGGACTGAGCTTGAGAGATTTCGGCCTCACCGCGACGGAGTGTGAGAACGCTGAGAAC  
TTGCTGATACGGCGAGCGCAATGCGAAGCGTTCCCTGACGAGGTTTCGAGCCTCATACAATGAAGAATCAG  
TCGGTCATCGAAGCGACATAAGAGGGGCTGGCGCCATACTTGGATGACAATGGAGTCTCGCGTGCGTATGG  
CAGGATCGATGCCGCACTGTGTATACCGCATAGCGCGAGAAGGCCAATAATNTTGTACACCCGGCACGCA  
CTGACGGAACCTGATTGTGTATCACTACCATGTGAAAATGAAGCATCAAAACGTGGATGCAACGATAGGCG  
ACATCAGGACCAGATTTTGGATAACAAAGCTGCGTCGANTGTCTGCGTACAGTAGTATNCAAACCTACATA  
GAGCGCAGCCAGCGNCACCTATAATGGGTCNTCTGCCAGAGGACNGACTGGAGGCCAATGGATGGCCAT  
TNAAGTTTACGGGTCTGGACTATTTTGGACCACTCCTTGTGACGATCGGACGTCGAAAGGAAAAGAGATG  
GGTCGCCTTGCTTACGTGTCTGACGACAAGGGCCATACATTTGGAGCTGGCACATGACCTGTCAACTGATT  
CCTGCATAATCGCGATCGGGAACCTTCTTTGCCGTCGCGGACCTGTACTGAGGTTGCGCAGTGACAACGG  
AAAGAACTTTGTTGGGGCCGACAGAGAAGCCAAAAGGCTCATAGACGTATTTCGAGCCGGAGAAGATTCA  
GGGTGAGCTATCTTCTAGAGGCATTGANTGGATCTCAAACCTGCCAGCGAACCAGCTGAAGGGGGAGCC  
TGGGAAAGGATGGTGCAGTGTGTCAAGAGAGTGCTACGCCACACAGTAAGGGGAGGTGGCACCAAAGCAA  
CACGTACTGGAGAGTTTCCCTGATTGAGGCCGAGAGCGTTGTGGATTCTCGCCCGCTTACCCACTTGCCGGT  
GTCTGTGGACCAGGAAGCCCCCTAACACCGAACGATCTACTCAAAGGAGTGGCCAATCTGCCTGACACG  
CCCGCTACCCACNNGCAGCCGAACGAGAGACGNGCCACGAGGAAGCAGTGGCGCACGGCGCGNCTGTTA  
CGAGACCGTTTTTTGGAAGCGGTGGGTCTTAGAGTACCTGCCTACACTTGTGCGACGCGTGAAATGGTGTG  
CGCGCGTTGAGCCGATACGCCATGGTGATATGGTGTTTATATGCGACCCGGCCGTGCCACGCAGAGAGTG  
GCGAAGGGGCATAGTGGAGGAGCTCTACCCTGGACCAGATGGAGTGCCTCGACGCGCCAGCGTCCGCGT  
GGCGGACAACAACCGAGTGCGACTGATGACTCGTCCCGTGGCTAAACTAGCCATACTGGATGTGAGTGAA  
GCAGGGCCTTCACGGGGGCGGAGATGTTGCGGGACGAATTAAGTTATCGATCGTTTAGTATTAAGTATAT  
TTCTGAAAGTATGTATATTTGCCCTCCGAATGTACGGGCACACTGTATTTGGCTTGTTGCCGCCATTACTTA  
AATGTTAAGCTCATTATTGTCGTGAGTTCGAAGGCCGTNGGAGGNAAGACTGCGGTAAAGATTCCGAGGGA  
ATATATATCTAAGTTCTAACCTATGTAATCCGTTTCAGAATAAAACACTTGCCTAGCACGTTTTGCATTAC  
GCTGTCTCTANTAACATCGGAGTAACATGGCCGGGGGCCAGGCGTAAACTTGCAGTGTTCAAATNGCAAC  
TNCACCTTCGTTTGGCACGCGACACTTAGTAAAACCTTTATCTCCTCTGAATAAAATTATGTCCTTAGTTTTA  
AGTCATATAGCTCTTTATTTNTTTGTTTGCGTAGTTCAAGCATATTTTTGCTCTTTGGCATGCTACTTCTAAT

CAATACTTACTTTCTTTAGCGAAATCTTCTATGTTCTATTTAGGTTCTATATTACCTATGGTATCTAAGTATT  
TCGGCAGATTACTAGTCTTACCAAACTAACTCATATGGACAATAATTATGTGACACATTTATGATTTATG  
ATGATGATGCCATGAGTCACAATGCACCGCATCAAGCAGGTGATATAGTGATGAGTACTGGACGGATGCC  
GCAGCCAGCGGATCCTCACACAAGGGCACCGCAGTCAGTGGATGCTCAATTGACTCAATTGACAAAGGAA  
CTTAAGTTGTGTGCGATTTCGGATAGAGAACTCCGACTTTTCCGCATATTGCTAGTGACGTTGCACGGGGCCA  
ATAAGCTGATCGATACGTACGCGCTCCTTGACGGTGACAAACGCAAGCGTCATGTATTGCGAAATGTGTA  
CGCTGTCCAACCTGAGCTTACCAATGAAAAGCCTGCATCGACGTCAAGTCCAAATGTCGGGCAACGGCGC  
ACGACTTCCAATGAAACCGTATCGCGGTGCGGAACCAAACTTCTGATTGGACTTGACCATGCACAGCTT  
GAACTGCCAATGCAAACAAAATATTTGCACCACAGGGACCATATGCCGCAGCCTCCGAACTTGGATGGG  
TGGTTTTTGGACTGGTAAGAAGTCAACCGACGGCAACGTCATCAAAAACATGCCTCCTAGCAGTGTCGCA  
GGAGGATGCAATCCAAAAGATGGTAAACGACTATTTTGATATCGAAAACCTTCGCCACCAGTCGAAGCCAG  
CGACGATGCACGAGCACAGAAGGTACTCGAAGACACCATGGTGAAAATAGGAGATCGTTACCAGACAGG  
TTTATTATGGAACCGTGATAATGTTAAGTTGCCACGAAGCTATGATATGGAATACAAAAGGTTTCGTCAAC  
ATTGAGAGAAAGAGAAAGCGTAACGATCGGTTTAAACAAGCCTAAATGAAAATTATGGACGTTTATGTTT  
ATAAAGGATATGCTCGACGATTGAAGCAGCATAAGGTCGCTTTGCAACAGCGACAACTTTGGTATCTTC  
CGCACTTTTGAGTTAAAGTCCGAATAAGCCCGGTAAGANAAGACTGGTGTTGACTCAGCATTGATCAT  
GTCAACATTTCGATCCTCTGGGATTTCTTAGCCGCCTCATGATAACTGGAAAGTTATTAATGCCTGAGATT  
GAAGACGAAATGTGC

>Ref\_dvir\_652

TAACCTGGCCGTTCTGGGCAATTAAAGCAACTCGTGACCTCCGGCAGTGGCCAGGTATCCCCTGGGTAG  
GCGCTGCACACCCGTGACGCGCCTAGCTAATACGAGAAGGCGACTAAGACTGAGACCAGTAACGTCTTAG  
GTTGCAAACCTCTGGACAACCCTACACGACAAGACGACCCCTGGGCTGACGGCTGACAGTATTCTAGCATC  
TCAGTAAGCGGAGTGAAATCTGGCCGAAATGACTGCTAGGTAAATGCTGTTACCGCCCCCGTCCCGTTAA  
AACATGGCAAATCTCCTAGCACGCTCCTCGAATCGTCGCCATTTAGTTGGCAGTATAGGTTTCAAGTGTGAT  
ATTCCTGATTAACGCGGATCTGGCTCTGAACACCCGACCCCATGAAGGCGGGTGTCAACCCTCGCATGGC  
CTCACTGCTTGCAAAGACAACCATGAGATCTAAACGCGACTGTACAACGACCAAGGACAACGGCTTAGGA  
GTTGGGACCCAATAAAATGAGTACCAATGAAACCCACAAATGAAGGAGAGCTGTGATGCTTTTGCAAAG  
AGCAGCAGAATGGCGAGATCACCCTAGGTGTTCCAACAGCCGCCCGACAGAGACGAACTCAGAACGG  
GAGCCAACGACGGCAAACCAGAGCAGCTCAGCACTACGAGAACTCGGGCAGGAGATCTCAAAGCTGGTA  
GTCATGCTCAAAGATGGAAAGCTCCATCCACCAGCCAATGCGACCGGTAGCCAGGCTACCGTATCAACGG  
CGCAGGAGACACCGAGCCAAAGCGGATGGCGACAAGTGGAAGGAGGTACATACAAGAAAAGGAAGGA  
GGTCACCAGGAAAAACAGCAAGGGATTGCTCAAGGAAAAGGCGCGACCGGATGCTATAGTCATCTCGGC  
AAAAGGCGAAGCGAGCTACTCAGAGATACTGAGGAAAGTAAAGCACGAAAAACTGGGCGAGCTCGGAA  
AAGCGGTGACAAGAATGAGGACACAAAAAGGAGACCTCAGCTTAACAACCTCGGGAGAGAATACCATAGC  
ATTTGGAAACCTGGTAGGCGAAACGTTAGGCGAAAAGGCAGAGGTCCGGACGCTGTCCCACCGAGTGAC  
CGTTGAGTGCAAGGACCTGGACGAGATCACGACCGAGAGGATATCGAGGCGCTGAGGGGTCAAATCCAA  
ATACTGGACATAGCCCCTGAGAATATCAGCTCCGAAAGGCGTACGGCCAAACACAGACGGCGACGATAA  
GACTGCCAGCGGGAAGCGCGAAAAAGGCCCTTTCAGTAGGTTTCTGAAAGTAGGCTGGGTAACTCAAG  
AATCCGCGAACGGATAAACATCACCAGATGTTTCAGATGCCTCGAGTTTGACATCTAGCAAGACACTGC  
AAAAGTGATCTAGACAGATCGAATCTGTGCCGACGATGCGGAGGAAAGGACCATCTGGCTAAGGACTGC  
AAACAAGAGCCACAGTGCATGCTCTGTAAGGACAGGAATGCCGACTCCAAACACATTGCCGGCAGCGGC  
AGATGCCCCGTGTTTAGGAGCGCCCTGGCCAACAGAAAATGAAGTGGACACAGCTGAACCTCAACCACTG  
CGAGGCTGCTCAGGCCCTGCTGACACAATCAATACGGGAGAGAAATACGGACGTCGCAATAATCTGCGA  
GCCATACAAGCCTATCGCTGGAAGTGGGGCGGACATTTGGTACGCACCCACAAGCTGGAACTGCGGAAT  
TTCAGACCATGGAAGAAATATCAGAGACGCAAGAGAGCTCCTCTCGTCATAGCCGGAGACTTTAACGCCT  
GGGCCGTGGAATGGGGAAGCAAGGAACTAACGCGAGAGGGACCACCCTGCTAGAAGAGTTCGCGGGGC  
CTTGCAAACGACGGGCAGGAGCTCACGTACTGCAAGGCCGGTAGAGGCTCTATTATAGACCTTACCCTGC  
TCAGCAGCTCACTTTATAGGCTAACTACATGGAAAGTCAGTAATGAATTCACATTCAGCGACCACCGAGC  
AGTGCAATTCGAGATCCACGGGAGAGGACGGAGAAAACAGCAGCCCAAAACAAGGCCCAATGGAA  
GGACAACAGCCTAGACGAGGAAACCTACACGGACTCCTTACGTCATGCTCAATGGACTTGGGCCACGGAG  
TTAGCAGACGACATGGCGCGGCAGCTCATGGGAAACATCTCGAACGCGTTGCGACTTATCCATGCCCAGG  
AGGATGCCAAACAGAAAGAGGAGCACCTTGCTACTGGTGGAATGAGCAAATCAGCGACCTAAGGAAGGCC  
TGCCTGCGTGCTAGAAGGCGCTCTCAGCGTGCCCCGAGGCCACCCAGACTTTGCATCTAGGCTGGAACCTCT  
CGGGCAGCCAAGCGAGACCTCAAGAGAAGCATTAAACAAAGCAAATCTAGCTGCTTCCAGAAAATATG

CGATGAGGCCGATGTTAACCCGTGGGGCACGGCATAACAAGATCGTCACGAAGAAGATCCGCAGCTAGGG  
AACAAACCAGGTGACCTGCCCTACCGCACTTGCCACTATAGTGGAGACACTGTTCCCCAACACCCACGA  
CTGGAAGTAGCCAACCCCTCACTGAGCACGGAGCTAGTGCAGCAGGTGTCGGCAGACGACGTGTTAGCGG  
CAAGCAAAAACTAGGCGACAAAAAGGCTCCATGACCAGATGGGGTGCCAAACAAGGCGCTAAAGTTAG  
CTATGTTAACAAAACCAGACGCCTTCGCCGAGACATATACTAGATGTCTACAGGATTGTGTATTCCCTAAG  
AGATGGAAGCGACAGAACTAATCCTTCTACCGAAAGGGGACAAGCCAATAGAGGGAACCCTCGGGATAC  
AGGCCAATCTGCCTACTGGACACGGCGGGAAAGGTACTGGAAAGGATTGTGTATGACCGACTACTTAGTG  
TCATCGAAGAGAAAGAGGGCCCTGTCCAAACAGCAATATGGATTTTCGCAAGGCAATGTCTGCGGTTCGATGC  
AATTAAGGCGGTGGTAGATGTTGCCGCTAAAGCAATAGAGGGAACCAGATGGAGGTGGGGAGACAAGGA  
GTATTGCGCGGTGATTACGTTGGACATCCGCAATGCCTTTAACTCAGCAAGCTGGTCTCGTATACTGGAAG  
CCTTGGACCGAATAGAGATACCGTCCTCCCTTTTCCGTATAATATCCAACCTACCTCTCCAATCGGGTATTG  
AGTTATGATACGGATGACGGTGCTAGGAGTTACACGGTCTCAGCAGGGGAACATAATGTACGACGAGTTG  
CTCAGAGTGTAATTGCCCCAGTGATGCACATAGGATTCACGGATGACCTAGCTCTAGTATTGGTGGGCAA  
AGAAATAGAAGACGTGGAAGCGGCAGCGAATGCAGCCATAAGGATCGTGGCCAGCTGGATGCGTGGCGC  
TAGCCTGGAGCTTGACAGGCCATAAAACAGAGGCGGTCTCATCACAAGCCGCAAAATGTCGAGTTTGCTA  
GATTACAGGTAGACAGCGTTAGTAAAGAGTCAAAAAACAACAGGATAACAGGCTTAGCTTTTCGACCGCA  
CGTGGAGTACGTAAGCCGGAAAACAGCCATAATGCAGGCG

>Ref\_dvir\_934

TTTGTGTAAACCCGAAAGGTACTGGTTCATTTTTTTTTTAGGGGGCCGTTTGTCCCAGACTGTATTGAAAG  
CTTTTTTGAAGTTCAAGGGCACAGGCATTGTAGCACGCTGTCTAGCGATGTTGCTAGATATAAAGGAATTT  
GCGACAGCTAATGGGTTGCTAATAGATAGGTTGTCTCTAAAACCAAACCTGATAGGGCTTAAGTATTTGAT  
GGGAGTCTAAGTGTTTTTTGATTTGTGCCATTAACATTTTTTCAAATAAGAGGCTAATAGCGGAGAGGATT  
GAGATTGGCCTGTACCCTTGTAGGCTTTGTGGTTTTGCTTTAGGTTTTAGTATGGGAGTTATTCTGCTGCAT  
TTCCAGGCATTTGGGAAGTAGCCTGAATTAAAGCAATGATTGAAAATAACTGCTAGGTGTTTGAGGACTA  
ACATATTGCAATGTTTTAGGAGGTAATTACTACTGCCATCTGGTCCCATGGTTTTTTTTGCTATTTTTCAATT  
TGACCCACTCGAGAAGTTGCTTGGCGTTTGTGAAGCCAAGCTCTTCTGAGTTTTCCAGTTGCCGTCTGCT  
CTTCGGCTGGGATCAAAGTTGACTATGTAGTTTGGTATGTGCAAGGGATTTTGTGCTATAGTGCCGACTCG  
CCTATTTATGCGGGCAGTGTTGCTTAAGCTCGGGGCTGCCATTAGACATGTCGTCATTCTGCTTATGAA  
TTTGCTCGAATGACCACGCTAGGGCATTGACTTTTTCAAATTCGACTTAATAACGGTGGAACGTTAATG  
TCGATTTCAATTATGCTCAGTGGCTGTTAGGTGGATGTCGTGTTAAGCGGCTCGTCTGTTTGGTGGTTTGGG  
TACTATGTCTTAGGGATTTTAAGCTTACCTTACTTGGCCTTATGTATTTACAGGCGGCTTTCTACATGTCGT  
AGGTTGCTAGTGTGGATATGACTATTGATTTGGATTGTGAGGTTCGGAGATAAGGGATTTAAGCTGTGACTT  
TTCGTCAAATGACAGTGAGTGTTGGCGCCTAACGAGGTATCTTCTAATGATGCGCTTCTGCTTGATAAGAC  
CAAGGCATTGTGCGCTTAATTTAACTGTATTATAGGGCTTGGATGGGTGTATAGTTCTTTTGGGGATGGCA  
TCTGGCGAGTCCAGTGCAATATTAAGTGCGGTATTAAGTTCTTCAATGTGTGCGTCTATTTCTTGAGGGCT  
TAGGTTGGAAGATATCGTAATTGGTCTGAGATTTCTTAAGAGAACAGAGTTCCATATGTCTGTGTTGATAC  
TGTCGAATTTATAGACTTTTTTTGGATCGGTGCTTATAAGTGTATATTGGCCTAGTTGTATTTTAGGGTTA  
CCCCGAGATGATCTGATGGGAATTCATCTATTGTGTTGCAGAGGGAACCTATGTTCTGTCTGGAGGTCTAT  
AGAGCATATAAAGAAATCTATTGAGGATGGGTTGTTAGAGTTATTGGGACGACTAGGTTCTTTGGGGGGG  
CAAAGAACGAAGTTGGGTTGTCGTAGAAGCCAGGTTTGAAGGTTTTTACC GGCGTTATTTATGTGGGCTG  
GGCTATAGTGGGGCACATGCCAACTAGGGTGTTTGGCGTTTAGGTCGCAACCTATGATTATTTGGCAACCA  
TTTCCAATATGGTGTAAGAGTTGAATAGCGTATTCATGTCTATTAGTAAGAAGCGGGTCTTTAGGGCGTTT  
GTATAATGAGACTGCTATAAAGCTTTGGGCGTTCCTGAGCGAGTCTTTGTATGAGAGTTTAATTGCTACGG  
CTTCGATATAGCATAGTGGCGGGATATCTACGCGTTCAAACCTTTATGCCGTTTTTAACGCATATAGCGACA  
GACGTACCATCATTTTCAGGGTGCGGTTGCGCATGTCTTGTGTGGGTGGCTTTCACATTTTGCCTTATAAAT  
TGGTATTGGGATAGCTTTGCGGTATTTCTGTTGCCTAGACGATGCTCTGCTATGAGCATTATGTCTGGCCTA  
TGTCTATTTAGGAATTGGTCGAACCTCATGTCTCTTCTGTAGTGATATGAGTGAATTGACGTTTTTGAAGAT  
ACATTTAAGGGAGGTCATTTTTATTGTGCGATTTGGATGAGAAAGGGCTTGTTTTATTGGCGAGCTTCTG  
ACTCATCTTGGGCTTGGCTGGTGGGGTATTTTTTGGTAAGTTTCTGCATGATGTCTATGCAGGTGAAAATA  
TCTTTGCCAAAGGCTTGGACACTATCGCTGTTGATGGTCTCAAGCGAGAGATTTGTTGTTTGTGGGCCATT  
TGGGCCAAATTGTTAGCAAGATGCTTCTTTAGTACCGGGTTGGTGACAACAATGTTTTTTTGGAGCTGTGG  
CTGACGGGAGTCGGGCCTAACCTCATCTGTTTTTTTTTAAAGAGTGAGGCGAATGGGACATTATTTTAAAT  
CTTGCTTACAGTTAATGCTGTGGTGGCTTTGGTAATTTTTTTTTTACATTTCTCTGTTTCGGTGCTATTTTGCTT  
ATTTTCGATTTTGGCCGTGATTGCTACTCTGACCGGGCAGATTTTAGCATTTGCTGGGATGTTTTGCCCTT

GCATTTGAAACATTGTGTTTTATTGTTTTCTGATGGGTTGTCAGTCTTTTTGATACTGCATTGCCCGGGGGC  
GTGGTCAGCAGTGCATTTGATGCATCTATACTGCATTTTGCAATTGCTTGCGACATGGCAATACCGTTGGC  
AGTTGTGGCATTGTTTTATTTTCCTTTCGGCTTTGAAGGCCTCAATTTTTATTTTGCAGTTAAGTAGACTTTT  
GATGGAGTATATTGTTTTGGCCCTTTCTGTTTTTTCCATTGGACCAGCCAAAATGACGCTAATGATTTTCAG  
GTCAGGGCAAGTTTCTTGTACTGCTATCTTAACCTTCATCTTCTGTGAAGATTTGCTGAGGTAATTTTTTTAT  
AACTATGGAGTAAGGCTTAAGTTCTTTGGGGGTGTAAGTATAGTAGCTTATTTGATTAAGGTCTAATAGTT  
TCTTAGTCTCTTGGAATCTTCGAGGGTAAAGACATTGATATGGGTTCTATTTTTGTTGATTATATTAAGTC  
TAAAACGCTCATTTTTTATTATTTGTCGCAACATACCTGTCAGTTCCTTTGGATTACATTATATGTCGCTA  
TAATGGGTAGTTTTGACGTCTTGGGTTTCCTCTCTTTTGTGTTTTGGGTGGTCCAGGTAATTCCTTCCTGGGTT  
CAGTTGGGGCTATCGCGGTGGTTTTCTCTGGGTCATCATCGATGTCCATATCGTCAGCTACTTTTGGAGTG  
GCTGGTTTTCTGGCCCTTTGATTTCTTGTTTTTCTTGGGCTTGGACGGGCCAGTTCTGGGAACTCGTCGTTT  
CTGCGTGGCTTCCTTCTCGTCTAGTTGGGAGAAAGCCGCAAATTTGTTGCCATCCAATGCCTTTGCCGTTG  
CTTGGATTTTTAGGTGTTTCAGCCGGGCTTGAATTCCTTGATGTTTCTTCCAAATTGCTCCTGACACGCTAG  
CAGAACCGGCTGGCTTGTGCTCCGAAAACCATTAACCTCCTTCCAAAATTAATGGTATTCTGGTGGATTTT  
CTCCACACCCCTCC

>9\_rnd-1\_family-387\_\_Unknown

GGCCACCTCAAGGACCCTCTGATGACCTTTGGACAACATGCAGTCCTTGCTCTGCCAATTTAGAATATGT  
NATTTTTGTCGCAGAGATAAAAGGGTGTAGATCGGCCGTATCCTTGCCGATCATGATGTCCNTTGGCCAAC  
CGTAAGTCCTCATCTCCCAATTCAGAATATNTAATGAAAAGGACGAAAGTCCTTCAGACAGCCNAGATA  
TGAGTACAATTCTTTCGTAAATTANCGAAGCCATAACTCGGCCGTATCCTTGACAGATCCTGACAAGTCCTG  
TGTCAAACAAATCGTNTGAACAAGGACCTAAACTGTCCAAAGGACATCAAAATCGTCCTTGCCGTTTCAG  
AGATATGGCCAATTTTCTAAAAAGGACATTTTTTAATTAGCCATAACTCGGCCAAATCCTTAAGGATATCG  
GAAGGATATACCGTTTTGAACTCGTGGNGAGCAGGACTATCGATTGGCATTCAAGGATTTCCAGGATTCG  
ACAAAAAATTTTCGTCGAAATTTATCCAGGGGGTTAGTCGCAAAAGTGGCNAAAATCGAAAAATTCGGGA  
CTAACTTGGCCATTTGAAGGACTATCGGGATGTCCTTTGGACAGTAGATAGTGCTCGTCCTCCCATTTAAG  
AAAATATAACAAAAAGGACGAAAGTCCTTCAAACGGCGAAGTTTTAAGGACAATTTTTGCAAGAGAAAA  
TAGGCCATAGCTCGGCCGTATCCTGGCGTATCCTGACAAGTCCTGTGGCAAATAAATTGTATTAACCAGG  
ACTACCAACTGGCCAAAATTCATTAAGATCGTCCTGNTAGTTTTGAAGATATTCAAGGATTTGTGTTTTCG  
GGCCATTTCCGTGCGCTCCGGGATGAAAATTTCAACAAGTAAAAATACAAGTCCTGGGGTTCTTAGATGAC  
CCCATATTTTTTTGATGCAGATCGATGCAGGGGGTCNATACGATCCTAACGCACCATGTCCTTTGAAAATCT  
GCAAGGATATGACCGAGTTATGTCCTTTTTTTTCTTACATAAAATGCTTTTATATATTTTTTCGCCTTGTTTA  
ATTTAAATGTGTTTTTATCCTTTCAGACTGACAAATTAAGGACTACAATGAGCTCTAAGGACCTCCACGAC  
TGACAAAGCAAATTTTTCCAGGATCGGACTTTAATTAAGCCAGATATAGTTATTTTAAGTTTCAATAAGCT  
ANAATTATAATTTATGCTCGATTTGTATAATTTTAAGAGAAATAATTAAGAAAACCTAGCATAAAAACAAC  
AATTTTATATATTTGAACATAAATAAATCAATTATTTTAAAATAAAAGAAGAAAATCCAGTTTTTTTAATT  
AAAAAATTCAAAAATCAATATTCCAACGCTTGGCCACATTTAAAATTTGTGAAGATATGAAAGATGTTA  
TGTCGTTCTAAAACGACATAACTCCGCGCGGAGATATGACGTTCTAAAACGACATAACTCCGCGCGGAGA  
TATGACGTTCTAAAACGACATAACTCCGCGCGGAGATATGACGTTCTAAAACGACATAACTCCGCGCGG  
GATATGACGTTCTAAAACGACATANCTCCGCGCGGAGATATGACGTTCTAAAACGACATAACTCCGCGCG  
GAGATATGACGTTCTAAAACGACATANCTCCGCGCGGAGATATGACGTTCTAAAACGACATAACTCCGCG  
CGGAGATATGACGTTCTAAAACGACATAACTCCGCGCGGAGATATGACGTTCTAAAACGACATAACTCCG  
CGCGGAGATATGNCGTTCTAAAACGACATANCTCCGCGCGGAGATATGNCGTTCTAAAACGACATAACTC  
CGCGCGGAGATATGACGTTCTAGAACGNCATATCTCCGCGCGGAGNTATGACGTTCTAAAACGACATAN  
TCCGCGCGGAGNTATGNCGTTCTAGAACGNCATATCTCCGCGCGGAGNTATGNCGTTTTAGAACGNCATA  
NCTCCGCGCGGAGNTATGNCGTTTTAGAACGNCATANCTCCGCGCGGAGATATGNCGTTCTAAAACGNC  
ATANCTCCGCGCGGAGNTATGNCGTTCTAGAACGNCATANCTCCGCGCGGAGNTATGNCGTTCTAAAAC  
GACATAACTCCGCGCGGAGATATGACGTTCCGGAACGNCATANCTCCGCGCGGAGATATGTCGTTTTAGA  
ACGNCATANCTCCGCGCGGAGNTATGTCGTTTTAGAACGTCATATCTCCGCGCGGAGNTATGNCGTTCTA  
GAACGTCATATCTCCGCGCGGAGTTATGTCGTTTTAGAACGTCATATCTCCGCGCGGAGTTATGTCGTTTT  
AGAACGTCATATCTCCGCGCGGAGTTATGTCGTTTTAGAACGTCATATCTCCGCGCGGAGTTATGTCGTT  
TAGAACGTCATATCTCCGCGCGGAGTTATGTCGTTTTAGAACGTCATATCTCCGCGCGGAGTTATGTCGTT  
TTAGAACGTCATATCTCCGCGCGGAGTTATGTCGTTTTAGAACGTCATATCTCCGCGCGGAGTTATGTCG

TTT TAGAACGTCATATCTCCGCGCGGAGTTATGTCGTTTTAGAACGTCATATCTCCGCGCGGAGTTATGTC  
GTTTTAGAACGTCATATCTCCGCGCGGAGTTATGTCGTTTTAGAACGTCATATCTCCGCGCGGAGTTATGT  
CGTTTTAGAACGTCATATCTCCGCGCGGAGTTATGTCGTTTTAGAACGTCATATCTCCGCGCGGAGTTATG  
TCGTTTTGGAACGTCATATCTCCGCGCGGAGTTATGTCGTTTTAGAACGTCATATCTCCGCGCGGAGTTAT  
GTCGTTTTAGAACGTCATATCTCCGCGCGGAGTTATGTCGTTTTAGAACGTCATATCTCCGCGCGGAGTTA  
TGTCGTTTTAGAACGTCATATCTCCGCGCGGAGTTATGTCGTTTTAGAACGTCATATCTCCGCGCGGAGTT  
ATGTCGTTTTAGAACGTCATATCTCCGCGCGGAGTTATGTCGTTTTAGAACGTCATATCTCCGCGCGGAGT  
TATGTCGTTTTAGAACGTCATATCTCCGCGCGGAGTTATGTCGTTTTAGAACGTCATATCTCCGCGCGGAG  
TTATGTCGTTTTAGAACGTCATATCTCCGCGCGGAGTTATGTCGTTTTAGAACGTCATATCTCCGCGCGGA  
GTTATGTCGTTTTAGAACGTCATATCTCCGCGCGGAGTTATGTCGTTTTAGAACGTCATATCTCCGCGCGG  
AGTTATGTCGTTTTAGAACGTCATATCTCCGCGCGGAGTTATGTCGTTTTAGAACGTCATATCTCCGCGCG  
GAGTTATGTCGTTCTAGAACGTCATATCTCCGCGCGGAGTTATGTCGTTTTAGAACGTCATATCTCCGCGC  
GGAGTTATGTCGTTTTAGAACGTCAT

>9\_rnd-5\_family-2959\_\_LINE\_\_R1  
GGACATGCAACGAGCCTGCGATGCAGCGATGGTGAGGAAAAAGAAAGGAGGTAACAAACACAAGCCAG  
TCCGATGGTGGAATGGCGAAATAGAGGATGCGCGTAATAGGTGCCACACAGCAAGACGCATATAACCAGC  
GCGACGGGAAACAGCAAACCTGGCCCTGGAGCACGAAGCCGAAGAAGCTCGCGCAGCCTACCACTCCTG  
GCGAGCTATGCTCACCAAGGCTATCAAGCGAAGCAAGCGGCAATGCTGGACCAACCCGATACCCAGCCTT  
CGGACAAGCCTACAAAACGGTAATGGGCAAACCTCGCAAGAGGACCCGTACCGACCTGCCAGAGCATCT  
AAAGCAGATAGTGGAGACACTGCTCCCGCGCCAGATAGAGCTAGCCCAACCCCTCCAGCCGTAGGCAC  
GTCGGTGGTGCTTCCCATCGACACAGAAGACATAAGTGCCGCGCTAAAGCGTATTAAATCAAACAAAGCC  
AGGGTCCGACGGCATCCCCAATGCAGTGCTGAAGACCATNGCTAGCGCTCACGCAGACACAGTCGTAAAT  
GTGTTCAACCTATGCATTGCCGAAAGAACCTTTCCAACGTGCTGGAAGTTGCAGAGACTGGTCCTTATCCC  
TAAAGCCGGAAGGACCCGCCTACAGGCCACTCTGCATGCTGGACTCCACGGGCAAGCTGTTGAGCGCA  
TCATCTGCGATCGTCTGAAGAAGGAGATCGCTGATCGCTACGGACTGTCGGACCAGCAGTTCGGCTTCCG  
TAAACACAGAGCACTGTCGNCGCTATCAAATTGGTAGCGGACACGGCAGGGAAGGCCATATGAGGCACG  
CGATGTCGCGGCGGATCCAAAAAGTATTGCCTTGTGAATATACTCCTGGCACTCTCTTGGCTGCAAATCTC  
CGAGTACCTCATCAGTCTTGTTGCCGGATACTTCAAGGACCGGGTACTCATATACGACACGACTGCAGGA  
CGACGCCAGTTCGCTATTACTGGGGCGTTCCCTCGCAGACGACATCGAAATCGTCACGGTGGCGAAAGAGA  
AAGCGCAGGTGGAGAGAAAACTAATGAAGCAGCCCATAAGGTGACTAGGTGGCTTGTAGAAAATGGCC  
TCAACTTAGCTGCGCAAAAAACAGAGGCAGTTCCTATCAGCAGCCGGAAGCAAATGGAAGCCGCCAACA  
TCACAGTGGAACGGAACCTAAGGTAGTTTCCAAACCTTCTATAAAATATCTAGGCGTGTTGCTGGAACACAG  
GCTCAGCTTCCAGGAAAGGCGAGTAGAGCTATAAATGCACTATCTGGCATAATGGCGAACACTGGAGGCC  
CTAGACAGCGCCGCGAGACGACTGATCTGCAACGTGGTCCAGTAGATGCTCCTCTACGCTTCATCGATCTGG  
GGACCAGCAATGAGGATCCCCTCCTACAGCCACAAATGGGCATCGTAAAGAAGATGCGCACTCCGAGTCC  
TCTGCTCTTTTCGGACCGTCTCAGACGACGACGCTCTAATGCTGGCCGGAATGCCCCCGCTTGATCTACT  
TTCAACAGAAGANCGCACCCGTAGCACGCAGCCGGGAGACAACACTAGNAGAATGGCAAGCACGATGGGC  
GTCTTCCCTCCAATGGCAGCTGGACTAAACGCATAGTCCCGGACCTACGGCCGTGGGTNAGCAGGAAGCAC  
GGACAAACCGACTTCTACTTGACCCAGCTACTGACAGGACATGGATGCTTTAAATCCTATCTCTTTAGGTT  
TAGGCATGAGACGGATCCGTTTTTGACACACTGTGCGCGGACCATAGAGGACGCAGAACACGTCTTTTTT  
GTCTGTCCCAGATTTTCTGCTGAACGGGAAGAGCTAAGCCAAAGTATTGGGAGAAATTTTACAGTCACTG  
ACTTAATAGATATCCTACTTAGCTCGCAAAACAATTGGGTTGCAGTAACCCACATGGCTGCAGAAATNAT  
CAAATCCTTGCGTCGCGCTGAAAGACAGCGCAATTCAAGTTCTNACTCTAGATAAGATCCTAGAAGAGGC  
TTTCATGCCATCTCCCCCTCGTGNNGTAATACTTAGCGGTGCTTCCGCNANAGGGAAACGGAGAGTAGGT  
GGTGGTTTCAGTGGGTGAANGTCCCCTTTTCGGCNTTAAATGCNTTCCCTCTATTAATAAAAAAAAAA  
GCACGCACACACACACAAACACACATTCAGCGACCAACCGAGCAGTGCATTTTCGAGATCCACGGGAGAGG  
ACGGAGAAAACAGCAGCCCAAAACAACAGGCCCAAAATGGAAGGACAACGGCCTAGACGAGGAAGCCT  
ACACGGGCGAAAGCCTTACGTCATGCTCAATGGACTTGGGCCACGGAGTTAGCAGACGACATGGCGCGGC  
AGCTCATGGGAAACATCTCGGACGCGTGCGACTTATCCATGCCCAGGAGGATGCCAAACAAAAGAGGAG  
CACCTTGCTACTGGTGGAATGAGCAAATCAGCGACCTAAGGAAGGCCTGCCNGCGTGCTAGAAGGCGCTC  
TCAGCGTGCCCGAGGCCACCCAGACTTTGCATCTAGGCTGGAACCTCTGCGGGCAGCCAAGCGAGACCTC  
AAGAGAAGCATTAACGAAGCAAACCCAGCTGCTTCCAGAAAATATGCGATGAGGCCGATGTAAACCCG  
TGGGGCACGGCATACAAGGTCGTCACGAAGAAGATCCGCCGCCAGGGAACAACCCAGGTGACCTGCCCT  
ACCGCACTTGCCACTATAGTTGAGACACTGTTCCCCCAACACCCGCGGCTGGNGTAGCCAACCGCTCACT

GAGCACGGAGCTAGTGCAGCAGGTGTCTGGCAGACGACTGTTAGCGGCAAGCAAAAACTAGGCGACAAA  
AAGGCTCCAGGACCAGATGGGGTGCCAAACAAGGCGCTAAAGTTAGCAATGCTAACGAAACCGACGCCT  
TCGCCGAGACACTATACTAGATGTCTACAGGACGGTGTATTCCTAAGAGATGGAAGCGACAGAACTAA  
TCCTTCTACCGAAAGGGGACAAGCCAATAGAGGAACCTCGGGATACAGGCCAATCTGCCTACTGGACAC  
GGCGGGAAAGGTACTGGAAAGGATTGTGTATGACCGACTACTTAGTGTCTCGAAGAGAAAGAGGGCCCT  
GTCCAAACAGCAATACGGATTTTCGCAAGGCAAGGTCTACGGTTCGATGCAATTAAGGCGGTGGNAGATATT  
GCCGCTAAAGCAATAGAGGGAACCAGATGGAGGTGGGGAGACAAGGAGTATTGCGCGGTGATTACGTTG  
GACATCCGCAATGCCTTTNACTCAGCAAGCTGGTCTCGTATACTGGAAGCCTTAGACCGAATAGGGATAC  
CGTCCTCCCTTTTCCGTATAATATCCAACCTACCTGTCCGATCGGGTATTGAGTTATGATACGGATTACGGT  
GCTAGGAGTTACACGGTCTCAGCAGGGGTCCACAGGGGTCTGGTCCTGGGATCACTCCTGTGGAACATAN  
TGTACGACGAGGTGCTCAGAGTGCAATTGCCCCAGGGATGCAGAATCATAG

>Ref\_dvir\_514

AAACAGCAGAGACACGGTCTTCTCATGACAGTAAACAAAGCGGTAAATAATGTACCCCATCTGAAGCAGAC  
CAAGAGCATAAATTCTATATATCGCCTAAGCGCTCTACGGGTTCAGCTGCGCATTCCGGACGGTATCAGAC  
GAAGCAGCGCTGGTTATCGCAGGGATGGTCCGCACAGCAGCAAGGATGCAAAGCATGGAACGATGGCAA  
GCACGTTGGGATCGCTCATCTAAAGGACGCTGGACACATAGGCTTATCCCAAACCTTGGAAGCCTGGATAA  
ACCGCAAGTATGGAAATACTAATTTTTACTTAACGCAGCTCCTATCTGGCCACGGATGCTTCAGGAGCTAC  
TTGAAGCGATTCGGCCACGATAACACAGACGAGTGTTCTTGGTGCGGCAGTGAAATCGCAGAGGACGCCA  
ACCACATCATCTTTGAATGTGGAAGGTTCTCAGCGAACAGGCAGGGCCTGGAGGACAGCTTGAGGAGACC  
TATCACGGTGGACAACTTGGTTCAGGAACATGTTGAAGACCGCACAAAAATGGGAAGCTACCTACACTTTT  
GCAGCAGAAGTGATGCTGGAACCTCAGGAGAGTTGAGCGCAATAGATGGAGAGCGGAGGAAGTTTAGGTG  
GCAACAACATGCCTGTGAAGCAATGCTTTGCGGCCGTTCCGCAGGCAATCCACGCCACCTAATCATCACG  
TACCCCCCTACTATCTACATCATAAGCATAAATTATTTATTATTTATATTATATTGTGCAAATAAACTACAA  
AAAAAAAATATATTCATAGATATCGATATCGATAACAAAATTTTTTTTTTTATATCAAGTCAGTTTCCTATA  
TAGGCTACATGGTTTAGATATATTTAATTTTTTTGAATACCTCGGTACAAATTTTCAACAGTTGTTATAAAA  
GTAAGGATATGCATTACATAAGGTGAAGTGGGCAGACACTTCCACAATTTTGTCAATAAATATATTCATG  
AAAAACTCTTAAGGCTTTTAATATAAAATATTCTTTACTTTACTTCTTTGCAAATATTATTTACACAACATC  
TGAATAACCATTTTTAATTACTTATTTTTATCGCACAGTAGACTTTACTTTTTTAAATACTAAAAATCTTATA  
ATTTATGGAGTCAACTGTTTCAGACATCACATACTATCCCAGATAAATCATCGTCATTTATAAATTGTACA  
TATTTTTCTCGCAAACCAATGGCACCGTTAGATGATGTTAGAGAAAAATTACTGTGCCAATTACTAAAAGT  
CTCAGAAACAATGTAGACGGCACTTTTACATATTTTTGTAAAACATTGCAAACAAAATTTGCACGCCACAT  
AGAGTTTAAATATAGAATGGAACCAGTTAGAGAGATCAGCAGTTTATCAAAAGACAAACAGCAAAGAAT  
GAAATTGCTTGAGGAGGGATGGATGCTACTTACAATGAAGGAACCTTTTATAGTTTCACGTCAATTAAGGG  
AAAACCTCAAAAAGAGGGCTTTGGATTTTGTGTGCTGCAATGGATTGTAAAGCCTACTTACCGAAGACAAC  
AACTTCGGAATCAAATTAATAAATTAATGTAGTAATATCCATAAAATATGCAACCGAGATATATTAACCTC  
TGCACGAAGTGCTGCGCAAATAATATTGCGAAATAAAATAATGCCTGTCCTTAATGACGTCGCCATTACT  
AGGACAATATTGTATGATCACCTAATTATATTGTTTAAAAATTTAGAAAGCAATGAAGCACACGGAAGTAC  
AGCATGATATGATAACAGCAATTATGCGTTATCTAAGTCGCCTTTTGATAGTAATAAAATATGTTATTTCC  
CCTAAATATTATGATTCTGTAAAGTCTGGAATTCGTTATGTTGCTGAGTTTGATTATGATAATATTTTCGTTT  
TATGAAGCCTACTGCAGCGACAACCTCTAACATGCTTGGTAAAAATAGTACATGTGCGAGAATATTAAGG  
CACAGATCATAAAATATTGCGACAATAGCATAAAATATTTAAAAAAGAAAAGATTTTGTTCAGGATCTA  
CCTGCTAAAGCTTTGAATGAGCTAACTAGAAATTCAACATATCATCATTAACTCGTTATATCAGAGCAG  
AGTTAGCGAACTTGAGAGTCTTACTCTTAAGAGCTACAGAACTGCTCATGCAATTGGGGCTATCGACGAT  
AGAGCTAATTCTGACCTGTATGAAGGCACCTCAGCCAAAATGAAAAACATCACCAGGGTGATTATTCGTG  
CCAAAAAACC GAACATTTCCAGTTCTTTTTACACCATGCGATCGGTATTGCATAGCCAATATACTCGAAT  
ATGGCAAACGCACAATAAATAAACCAGCTACTACACTAAAGATATATTTTAGTGTGCCAAGCCCGTGGCC  
ACTAAGAAAAGAAAATATTCGTGAGTGTCTATCCTAGAGAAATTCCCAAATGAATGTGGTACACGTTGC  
CCTGAGTCCCTTTCAGGCACAGACCTGCGAAAGCAATTGACCACACATACCGCTTTGTTCAACGTTAAGG  
ACATTCAAATTGATTATTTGGGGCAGAAGCTTAATGGGTGATCATAAAGACATTTATAAAAATTACTATCG  
TGTTGCTGCCTCTGTAGCGGGGGTGACCCAAGTTTCTCAATTACTTATGTCAACAATGAACATGGAAGAGG  
AAAATGCTGAAATTGCAGATGCTAATCTCGAGAGTGAGTTAATTTATTTAGCCTGTCTGTTGCGAAGAAA  
ATTTTAATAATCGCCTGCAAGTTTTGGACCTGGAACCTGTCATGTTTCGGAATACTTCAATAGAAGTTTTTCA  
AGTATTGGAACCTTCGATACAGTAGAAGATACATTCAGTATTTAAAAAATTAGTAATGGTTTTGGCGACCTA  
TCCATATTTAAATATTTTGATGGCGGGACCTCGGTCCGAGTTTTTTTTTTTAAATTAATAGATTAAACAAT



ATAATTTAATACTTATATTGCTTATTTTATTTTAAAGCAAAATATTTAAATAAAATATTTTTCAACTGTTTATT  
TAAACGAGCCCCGAACCTCGACCAAGCCAACATAAATATTTTAAAAACATAAAGCGCTCTACGGGTCAGCTG  
CGCATTCCGGACGGTATCAGACGAAGCAGCGCTGGTTTCGCAGGGATGGTCACAGCAGCAAGGATGCAA  
AGCATGGAACGATGGCAAGCACGTTGGGATCGCTCATCTAAAGGACGCTGGACACATAGGCTTATCCCAA  
ACTTGGAAGCCTGGATAAACCGCAAGTATGGAAACACTAATTTTTACTTAACGCAGCTCCTATCTGGCCAC  
GGATGCTTCAGGAGCTACTTGAAACGATTCGGCCACGATAACACAGACGAGTGTTCTTGGTGCGGCAGTG  
AAATCGCAGAGGACGCCAACCACATCATCTTTGAATGTGGAAGGTTCTCAGCGAACAGGC

>Ref\_dvir\_956

CAGCTGTGTCAGCGTGGAGAAATCTTGCCGCCGCAACGTAGAGTTTGTATTCGGAAGCAGCGTTTTGGTA  
GATCCGGTGCAACTCCTGTACCGGCTCGTACCTGGCGTGGTGCATCAGAGCTCTCAGCTCTATCAGGTA  
CCTTGAACCTCCTCCCCACGCGTTGCCTGCGGGACCGGATCTCGTCCTCAAGCCTTTCGAAGTAACGTGGG  
GGCAGGAAGAACTCCAAGAAACCCCTCCTGAACACCGACCATGGCACATCCCTTAGCCCACTGCTCAGAA  
ACCACCGAGCAGCCCTATCGCAGAATACCTCGCTCATTGCCCTGGGCATACGGTCGAGGGCTATACCATA  
GGTGATAGCGCGCTCCTCGAGGTCTCTAAGAACCCAAGGGGGTTCGGAGCGTCCATCGTACCTCATAACC  
CACTTCCGAACCTTGCTCCGGGACATTAGGAAGTGGCCTCGCCTCCGATGGATGGTGCGGCCTAGTGTAGC  
AGGGACCACCACCGGTTCAACAGGGGACCTCCCCACCTCTGCGTTGACCGCAGTTGCTCGGCGGTCTTC  
ATTTCCACCGAGAGCAGGAACCTGCCTCCACGCCCCGAGACGGTCAAACCTCGGGGTGGGCGCCTGCAAAAGC  
CCGTACAGCTGGGAGCTTCTGAGGTACAGGTTCCGACTTTTGCCGTGGCCGTCCACCAAAGTCGGGTGGGA  
CGCCCCAAGATGGCGGCTCAAGAGTTTTAGCATACTGGGATTCCAGCTCGGCGAGCCGAGCCCAAATCCC  
AGTCGAATGACCGCCCTCCTGCACGTAGGTGGACAGCCGCTTACGTAGCTCCTCCACGCGCCCTCCTTTT  
CCAGCCCAAACCTCCTGGGCGATCGCCACTAACTCCTCTTTGCGTCGCTGGTGAATCCAGCGGACGCCTACC  
CCCGGGTTTTGGCACTCACCTGCCTCCATCCTTTATTGTATACTTCCTTGCTAGTCGACGTCGCTGTTTCCC  
TCTCTTCCCGTTCTAAGGGGTTCCGTGCGTCCCTTTACTATTCTCTCTCCTTTTCTTGGTGTGGTGTCTTT  
TCACTTTTACGGATCTTGCTCAGCCACTTTGTTCTTTTAGTTTTCCCTTTGTTTACCACCTTGAAGGGTGAC  
CACTTCACTGCCCCCGACAGCTGTACTCACGAATTCAACTTTTCACCGCGCGTGAGTTGGATTTCGCCCCAC  
TGTACAGCCGCTGCCGCGACGCCTTAACGGCCCTTCGACGCGCGACGTGCGCTGCGCCGCGCGTGTGGGCA  
CCCGTGTGCGAGCGTGGTCTCGACGTCGCCCCGGCTGGCGCGCGCGCGCTGTACTCTACGACCGACCGTT  
ATGTTTTCTGCTCTCTTTATCTTACTTGCCGGCTTGCTGCTAGCATTTTTGTCACTCACCAGCTGCACGTGTTCA  
TTTTCTGGCTATGCCTAACACAAGGTATAGAAATGTTCTCTGGGGTATACCGGACTACTTAATACCCTATT  
TTCATATTTTCGCACATACATGACCTTCTCATTTTCTTGCTCTCTGCTAGGTACCTTGGA AAAACCTAGTAA  
GGAAGCTTCTGGCCGGGGTATAATTCTCAGTCTTACCAGGTCTAGCGAGTTACAAGTTATTTATAATTTCTG  
CTGGGAGAGAGGGCTTAAAGGGGGGGTGAGTATCCTGACCAAACCAAACCCAGATCTACCTCTACACACC  
TACACCATCGGGCCGTGGCCTCGTACCATCTATGCTAGCGGGCCGTGGCCTCGCTCCAACCACACTAGCG  
GGCCGTGGCCTCGCACCAACTCCACTACCTAAATACTCTATCTTTCTGCCGGGCCGTGGCCTCGTACCACT  
ATGCTAGCGGGCCGTGGCCTCGCACCAAACTACACTAGCGGGCCGTGGCCTCGCACCAACTCCACTACC  
TAAACACCAACCGGCAATGCCACCCCCGGAGCCACAATCTCGTACCGCATGCCCTCGTTCGAGGTTAGG  
TCGAACACCGGTTAGTTCCGATGTTAAGGTAAGCCGGGTACCAGGAAACAGGGAATAATCCAATACTTT  
CTAGATAATTACAACGTTGGCACTTTATTCACTATTATTCAATCCGACCTTATCGTAAATCCTAAGCTAAAC  
CCTGCCGCACTGTTTTCTGGAGCCCTAGCGCTCCACTATACCATCTATGATTTTCGTTTATCTCGCGCAGCAC  
TTCTACTCACCTTAAACGTTTCGATCACAAGTGCCGGCACGCTCGCCGGCAAGCCATGCGCTCGCTTCGGCT  
GCTCAACTTCGCCGCGAGCTTTTCGCAACTTCGCCTCGGAGCTTTTCGCTCTTCGCCGCCGAATTGAAGTTGC  
GCTCTCAAAGACGGTGTTGAGCAACCGATCGACAACGCACGGTTGCAGCGGCGGCCGGCGGTTAAATTCA  
AACTCACTATTTAAATCAATTATAATATTCGCGGCTCCTTGCCCTTTTGCTACTAATCGAACTGCTTATATT  
ACTGATGGCTCCTTGCCCTCTTATTTCACTAAGATCTTAACCTAATATAATTAATACTTATAACTAAAGAAA  
ATTAATACGTTGTCCCGCCAGCGGCTCCTTGCCGTAATTTGGCCAAAGGGATGACGGCTCCTTGCCGTGAA  
AACTGTGGGGTGGCTGGTCTCATTAGCCGCCTCACATTCACTTCGGACAGGTGACGGTCACGTCGCCTTTC  
GCGTTCAGCGTAACGCTGTACTCGCTCTCCCCGTGCGACACGTGGAACCGAGTACGTCGCACCGGAAGCG  
GCGGATTCGCGCCTCTCTGGCGATTAGGTCCACCACGCCCCGACGACAACGGTGTTCCAAGAGGAAACACC  
TTCCAGCCTGAGGGGGTGGAATCGGGCACGGGTTCTCGACGGGGCCCTCCGGTTTTACCCCAACGTCAG  
CACTGTGGGCGATCGCCTCGACCTCGGTGTCGGGTTTCTTGGGGTGGCTCTCCGGTGTGACCCTCACGTCG  
GCACTGCGGGCGACCGTGTCGACCTCGGTGTCGGGTTCTCCTCCAGCACTGAGTCCAGGCTAGTGTCCCA  
CCCGTCGATGCCGTCGAAAAGGTCCACTATGTCTGCCACAACCTCGCTCTCCGTGGGAGTCTTTAGAGCCA  
TGGGGGAGGAATCCTGGGTTGGACTCGAAAGCTTGGGCGACGAAGCCGTCACCACCGCGTCCTCTTCCTC  
GGACCAGACTTCATCCCGGCCTTCCTGGCGAACCGTGAAGGAACCTTTTCGGGATGGCGCCTTGCCCTCTT

GGCCGAACCAGGCGTCTTCTAACTCCCGCCGGGCGATGGTGTCTGGGTGTCTCGGCGCGGGCAATAGGCAC  
GAGCGCGGGCATCTCGTCTCTCGTCGTCGAGCCACTCCTCCTCCGATTCTTAGGTTTCGTCCTGGCGCCTCG  
GCGCGGGGTGGGAAAA

>Ref\_Penelope

GATCGAAAAAAGCAACGTCGTTTACCAAATACCATGTGGCGGGGATAACAACAACAAGTGCAATAGTGT  
CTACATAGGTACAACAAAATCGAAGCTAAAAACAAGGATTAGTCAACATAAATCGGACTTCAAACCTAAG  
ACATCAAAAATAATATACAGAAAACAGCACTTATGACCCATTGTATAAGAAGCAACCCACACACCAAATTT  
TGATGAAACAACAATCTTACAACAAGAACAACACTATAACAAGCGACACACATTGGAAATGCTACACAT  
AATTAACACACCAACCTACAAACGACTAAACTACAAGACAGACACAGAAAATTGCGCTCACTTGTACAGA  
CACCTCTTAAACAGTCAAACAACCTCAGTAACAATCTCCACGTCAAAAAGCGCAGACGTGTAAAATAATG  
TATGTAAAATGTTTCGAAATAATGTTTAATTTATTGTATTATAATTGTTAATTGTTTTTTGTATCTTGGTGTTA  
GTGCCCTGAAGACGGTTTGCCGATGTGCAACCGAAATATATCGGAAGAGAATTGAATAAAAATTGTTTTTC  
ATTGTTTGTTTTAACAAACTCGGACCTCGAGCCAGCCAACAAATAAATATTGAATATGGAAAGGTTCGCC  
AGAGCCATCAATAAATATCAACGGAAGGCACGCCGTATGCACAGCAACCAACATGAGCTACGCAAAAAT  
AAAAACTAAATACAAGGATTCGAAAAGAACAATTAATAAATTCCAATAACACTGGTAAAATTAATACTAA  
ACTTAAATCTAGTTTAAAATTTTTGTATAAAATGTAGAAAATCAAATTTAATACCTAACTTCATCAAAAAT  
TGACACAGCATTGTGACCATACTGACCACTGACAATAAAACCCACCCTGACATAACAAGAACATTGACTAG  
ACACACACATTTTTTACCATACCAAATATTTAACTTACTTATAAAACACAAACACAACCTATTACAAGAA  
CAAACAAAACATATGGAAAAAGCAAAAACAAACATAGAACAACTGATGACCACAGATGACGCAAAAAGC  
GTTTTTTGAGAGCGAGAGAAATATAGAAAACAAAATAACAACAACACTCAAGAAAAGACAAGAAACGAA  
ACACGATAAGTTACGAGATCAACGGAACCTAGCCTTAGCGGATAACAACACGCAAAGAGAGTGGTTTTGT  
AAACAAAACAAAATAGAATTCCCGCCAAACGTCGTAGCGTTACTCGCAAAAGGGCCGAAGTTCGCTCTC  
CCAATCAGCAAGAGAGATTTTCTCTCTTGAAATACATCGCAGACGGTGAGGAGCTAGTGCAAACAATAA  
AAGAAAAGGAAACACAAGAGTCGGCGCGCACAAAATTCTCTTTGTAGTCAAAGAGCATAAAACCAAGA  
ACAACCAAAACAGTAGGGATCGAGCAATACTGGACACAGTGGAACAGACACGAAAATTACTGAAAGAAA  
ATATAAATATTTAAATTTCTATCGTCGGATAAGGGCAACAAAACCGTAGCAATGGATGAGGATGAATATAA  
AAATAAAATGACAAATATTTTAGACGACTTATGCGCGTATAGAACATTGAGACTGGATCCGACATCAAGA  
CTACAGACAAAGAATAACACCTTCGTAGCACAATTATTCAAGATGGGTCTTATTTCAAAGGACGAAAGAA  
ATAAGATGACTACAACAACAGCGGTACCTCCGAGGATATATGGACTACCAAAAATACACAAGGAAGGAA  
CTCCACTGAGACCAATATGTTCTTCCATAGGATCTCCATCTTACGGGCTGTGCAAATATATAATAACAAATA  
TTAAAAAATCTGACAATGGACTCTAGGTACAACATCAAGAACGCGGTAGATTTTAAAGACAGAGTCAACA  
ACTCCCAGATTAGAGAAGAGGAAACATTAGTATCTTTTGACGTAGTATCCTTATTTCCCAGCATACCAATA  
GAATTAGCACTTGACACAATAAGACAAAAATGGACCAAATTAGAAGAGCACACGAATATACCGAAACAA  
CTATTTATGGACATAGTTAGATTTTGCATAGAGGAAAACAGATATTTCAAATACGAAGACAAAATATACA  
CACAACCTTAAGGGAATGCCAATGGGATCACCGGCTTCCCCAGTAATCGCAGATATATTAATGGAGGAACT  
GTTGGACAAGATTACAGATAAATTAATAAATTAACCAAGACTCTTGACCAAATATGTAGATGACCTTTTT  
GCCATAACGAACAAAATAGACGTGGAAAATATTCTAAAAGAATTGAATTCCTTCCACAAACAGATAAAAT  
TTACAATGGAATTAGAAAAGGACGGGAAATTACCATTTTTAGACTCTATTGTAAGCAGAATGGACAACAC  
ACTCAAAATAAAGTGGTATAGGAAACCCATAGCCTCCGGACGAATACTCAACTTCAATTCAAACCACCCA  
AAGAGTATGATAATCAATACAGCACTAGGCTGTATGAATAGAATGATGAAAATATCGGACACAATATACC  
ACAAAGAAATTGAACATGAAATCAAAGAACTTTTGACCAAAAATGACTTCCCCCCTAAATATAATCAAAAC  
ATTATTAATAAAGACGACAAATCGAAAGAAAAAAGCCAACAGAACCTGCTAAAATATACAAATCACTAAT  
ATATGTACCACGACTATCAGAACGCCTCACAACCTCAGACTGTTATAACAAACAAGATATAAAAGTAGCA  
CACAAACCGACGAATACATTACAAAAATTCTTCAACAAGATAAAGTCGAAAATCCCGATGATCGAAAAA  
AGCAACGTCGTTTACCAAATACCATGTGGCGGGGATAACAACAACAAGTGCAATAGTGTCTACATAGGTA  
CAACAAAATCGAAGCTAAAAACAAGGATTAGTCAACATAAATCGGACTTCAAACCTAAGACATCAAAATA  
ATATACAGAAAACAGCACTTATGACCCATTGTATAAGAAGCAACCACACACCAAATTTTGATGAAACAAC  
AATCTTACAACAAGAACAACACTATAACAAGCGACACACATTGGAAATGCTACACATAATTAACACACCA  
ACCTACAAACGACTAAACTACAAGACAGACACAGAAAATTGCGCTCACTTGTACAGACACCTCTTAAACA  
GTCAAACAACCTCAGTAACAATCTCCACGTCAAAAAGCGCAGACGTGTAAAATAATGTATGTAAAATGTT  
CGAAATAATGTTTAATTTATTGTATTATAATTGTTAATTGTTTTTTGTATCTTGGTTGTTAGTGCCCTGAAG  
ACGGTTTGCCGATGTGCAACCGAAATATATCGGAAGAGAATTGAATAAAAATTGTTTTTTCATTGTTTGT  
AACAAACTCGGACCTCGAGCCAGCCAACAAATAAATATTGA

>160\_rnd-4\_family-2259\_\_LTR\_\_Gypsy

TTATCTCGCTCGCACTTACTCGCAGCTTTCAATGCTCTCTCTATGTTTAGGGATCGTTTCAATGTGTGTGTG  
TGTGTATTTGTCCGACGAGCAAACTGCGCACAAATTCAATTTTTCCCAAATGCTGAGGCATTTCTACCCCT  
TTTGAAGGCACGGCTAATATGAAATAGAGAAAGGGTTTGCCACGTCGATGCGAAATTCTTGCAATTTTAGC  
TCACTATCGTTGGTAAGGGTACCCAAGCGTTGGCATGTGTGCATTTAGAATATTTTGGACTCGCTATACAC  
GCATACTTGCATATTTTGTGTATGAATAGAAGCATTATGCGCTTGTGTGCCTGTTGCTTGCCTGCCTGCCT  
GTCCCCGATGCAAATTTAACAAGATTTTAGGATTTCTGATTTTGGACCTCTACACACAGACACACACATAC  
AAATGTCTGTGAATGGGCTGATCATGGGCGCAAAAGAAAATACATTATTGGCACGCGTCTGACGCGCGCC  
CTTCTTTTAAATGATTTTGAATGAAATTTGAGTAAAAGAAAAATCTTTAAAATATTAATAATATACCAAATT  
AAAAAAAAGGAGCGATTATATATTTATAGTTTTAATAATTTTGGTGATCAGTCACTTGACCTCCATATGC  
AGGTGCTTGCCAAAAGTTGACCCACTTGACCCAACGAACTGGTGCAGGTAATAAGGGGTCAACATTCATT  
CATCAAAATCTAAGGGCGCTCGTCAGACGCGTGCCAATAATGTATTTTCTTTTGCGCCCATGATCAGCCCA  
TTCACAGACATTACATGTACTGTCTCTCCACAAGTTCCTTTGTTTGATTTCGGGGTCATTTCATGTTTACGTCT  
AGTGTGTTCTACAAAGTGCGTTTGCTATAACGTTCTGCGAACCCTTTTTGTATATTACTTCATAGTCGTAT  
TCCAACAGTCTTTGTTTATATGAATGGAACCTTAAAAGTCAAATTTTACATCCATTAACACAAGTAATAACA  
ATATTTCAATTTTAGAAATAGCAGCTTTATTTATTAGACACCAAAAAAGACACCAAACTTATCAAAGACA  
AAAAACTTAAAATGTATCAATTTCTGTGCTGCCAGATAGCCACAAGTCTAAGCTTCCATCTGACTAATTTG  
GAGTTGGGTTCCTTTAACTCATTAACCAGGTTAATGGCTTGTGGTCTGTAAATATCTTAAACTTTTGACC  
GAATAGGAATAATTTTCTTCTGTATCGGTTAGTGTTCGGCGTGCGAACAATAATTGGCTTATCAGACCCATA  
AGGTCCTTGTGATAACACAGCTCATAACGCTACGTTGCTAGCATCTGTTGTTAGTATGAATGGTTTCGTAA  
AGTCGGGGTAAATTAGTAATTGGTCGTTACAAAGCAAGGTTTTACAGTAGTTAGATGTTTCTATAAATTCA  
TCGTTTAAAACAACAATCGTTTTCCCTTTTAATTGTTTAGTCAGGGGTTATATTTGGGAAGTCTTTCATAAA  
CTTCCTGTAATAACCCATTAACCCCAAGAAGCATTTAATTTCTTTTTAAGATTTTCGGTAAAGGACATTTTTT  
TATAGCTTCCATTTTTGACGGGTTTGGTTTAAACGCCATCTAGTGTACAATGTGTCCGAGGTATTCAATTTT  
TTTTTGTAGAAAGTCAGATTTGTCCATTTAGAAATGTTGTAAACATTGTTTGTGAAAAGTTCTCTTTTG  
TTTCAATGACCGTTTGATTCACTTATTTTTCTTTTACGATATTGAGTAGAGCTCTTTGAATATCTGTTATCTT  
TTCGTACAGAATTCCTACTGGGTAACATTGAAGTGAAAGGATGCCTAGGTCTGCCATAAGGCTATGTTTCG  
GTTCTCATGTCCGCGAAGTGGGTAATAAGTTTATTCTTTATTTTCGTCCAGTTCAACTCAGTTCCCGATTGG  
TATAGTACTTCATGCGCTTTTCCCTGAATCTTGTTTCTGATTGCCCTTAGTATCATTAGTCCGGTTGGAGTT  
TGGGCTGCCCTTTTATTAGCATTAATATCTACTCAACTTTTGTAATATATTCCTTAGTCCCTCCATGTTCC  
CGTCGTATGTTGGGAAGGTTTTTAAATAAATCGACAATTTTAAAGCTACCTATTATTTTTTACATGTGCAA  
GTTGGCAGGTTGTGCCGGGGGATTACCTGAGCCATGTACATGGTTTCGGATGCTTCTTCTTCTTAATATC  
TGGGATGCTACTAGTGTGTTTGGCACCTCTTGTAAGGAATTATTCTCCTAACCCTTCCTAAGTTAGACATAA  
ACGGTATTATGTTGTAGATATGTAATTATATGCTGTATATGTATGTATATATGTTGCTTATCTTATGTATAT  
AGTTTTAGTCATTGAGTAATAAAGAGAAAGAGCTGAAGTACGCTCTGAGCTTTTTTTTACCGTTTTAAAAA  
CCACGAGNCGTAGATCGGGTTGGTCCGCAACGCAAAATCAAACCAAAAAAAGCTCATTACCATAGG  
AAGCAACAACAATCACTTGCAAAACAACAAGTGCACGCAAAACCAATTTGTTCTTCATCCCCCGTT  
TTGATCGACAAGAGGTTTGTGAGCCATGATGAGGACATAGGAACTCAGTGAAAGGGGACAAATAATGC  
CACNGTGTCTTTGCGGGTTTCTCTGTCGTTCCCTACAAGGCAGCGCGTTAGAAACAACAACAGCACAAATTC  
GGGTACTAATGTTGTTGTTGTCAGAGCCGAGTCTCGGCGCAAGTAGGTAGAGAAAATTTGAATGCCAGCAG  
GCCATGGCATTGAGATCAAAGGGTTACGCGCACGGCGCNCCATCATATATTATGACGTCACAGTTNATAG  
AATTTTATTCTTGTGATGTTTAGATATATTTCTACCTTTATTAGGTACATTTAAATAACTTATGAATGGGG  
TCTTTTATAGNAAATAATTCGTTGACATATGTAATNATTTTATATACGAAATGATCGCACATAAAAAGCCT  
TGGACTGTGACGTCACATGCGCAACAGAACGTTGCAATCTTCTTAAATTCATAGACTTCCCTTGGCTTGGC  
AGACACATCATATATGCAGATTTGCACCAATATGTGTGAGATGAGACACACATAACAACACTATTTGGCG  
GGTCGCGGCATTGATACTCTTTTATAAGAATGGTATATAATTTATAAAGAAAACAATTATTATTGACTGT  
ACTAATAGTTGCACACTAAATACGAAATTATATTTTTCATAGACATTGAATAAAAATGTATATATAAGAN  
GGTTTGTGCTATTTGGTTACATCGCTTATGAATAGTTAAAATACCCTATTTTGAGAAAAGGTGCCTTGCTG  
GTCGAAAAATGATAAAAATCTGCCGAT

>9\_rnd-5\_family-2925\_\_DNA\_\_Maverick

ATATATATAGTTACATACTCTATTATATGTCTTTAATATTCAGTCATCTCTTTAACTGCTAACAGGGGCAGTC  
AAGCTGTATATCAGCCATTCTAAGGGGCTGTTTAACTGCTATAAAACCGTTCATAACAGGCTGTTTAACT  
GCTATAAAACCGAATAACAGATAAGTTACTGCTCTAAAACCTGTATAGCAGATCAGAAAATGGATGAGAAT  
TACTAAAGGAATTATCAAAGACTAGAAATGTTTTGAAAAAATAAAAATTTCAAAGTATTAAATTAGGTA  
AAGCTGAATCCGCTTTACAACCTGGAAGAAACATTAAGGCCCATACAGCACCATTGCAGAACTCGTTAC

TAAGAGTAATAAATTAATAATGCATTTTTTGAACCGAAGAAAGAAGAGCAGTCGTACACGCCACTTATT  
TCAAATACTGGAATTAAGCCAGAGTTAGATAGTTTCGCATTTTAGACGACGGAACTAGATGATGATGATG  
ATGATAATACGAGAATCAATCAAACCTGATGTCTATGCTGATGCGGATGATGATGATGATGATGATAA  
TACAGTTAATCAACTCTACTCTCAATCTAATGTTGGAGTTGAAAATATGTTTAATCTAAGTGAATTAGCTA  
GAAAAAAGATACTTGATAAAGCGTATGGACCATATAAGATTTAAATGGTGAATTAAGGTTAGGAAATTCT  
ATTCATATATCAGAAGAAAAATTTATTCTAGACAGTGGTGAAACATGGGATCTCACTACAGGCTTATATTC  
TTTAATTTATGAAAATACTCTCAGAAATTATACGATCTAGACCACAAATTATAAAGATATTCTAATAAAAA  
CTTCTGCTCACAGAAAACATAACAAACCTGATGGACAACCTTAAAGGAAATCGTTTCGAAAAAATATTTAAC  
TATAATTAACATNTTTTTTCCAAAATTATCTCAANAAGTTCTTTTTTCATAAAACAGTACCNATTGCCATATC  
AACTCCAAATCAATCAAATCATCTATATCCGGTAGTGGTATAATGAAGCTCAATACAAATAAACCAAAC  
TATATTTACTGGGATGATCCTAATGAAATTGTTGATCGATTAAAGCTTCTAATCGCCTCACAAACAGCTGG  
TCATAGTAATCATAACAATGAGATAATTTCAATAGTTGAAGAACTTCGGGAAGCAAAAAATTATCGAATA  
AATTTATAAAAGGGAAAAATATTTGTATTTAACTGACATTATTAATAATGAGTATCGACAAGTTTGGACATT  
ACTCCTCAGCTAAAAAGAGGGATTCTGTTGACAATAAANTTTATGTTNAAAATATATTATACAAATCAAA  
AGAGGATTTGGAGCTTCTCATAACATAATAAAGTTGATGAAGTAGATAAATCTATAAACGAACGTTTAAAT  
AAAGTTAATATTGAAATTCCAAAACCTGAGAAGTGATATTAATTTATATAATAATACGATTTTTTGAAAACCT  
TGAAGAGAATAANATAAGTTTTGAGAAAATCTTACAAAAATCAAAAAACTATTTGTATACGTATATTAAT  
AGTGAAAATAATGAATTGAGAGAATATCTTATAAGTGAAAATGTTAAATTAAAGAGTATAAATACAAAAT  
AGCTTGAATGAACCTAAGACGTTTTTGTNACTTATATCAATAGTGAAAATATTGCGTTGAGAGAGTATAT  
TAATAAGGAAAAATGCTAAAATNAGGGAGTCAATTACATTGTTGAAAAGTTGTGTAGCATATCTACCCTA  
CCTTATCATAAATCAAAGGGTATAACAATCCGTTAATACATTGTGACACCTTGTCATAATAAATGCAAATA  
TACAAATGCCCAAAGTACATTAAAAGACCGCTTAGAATTACATAAACGTTCCGGCGCACAAGCTNTACGA  
TCCNTCGCTTATACATAAGCCGATCGTGGCGCGTAGGAATGCTGAGCATGCGCTTTCGAGCTCAAGCGGT  
CAAACCATAACANAACATATNCATGCCTTCTGCATACATATGTATATACCAACANACTTATACATACATATA  
AACCCAACATGAACATATAAGAACGATTCTCAATAAAGTAACAGAACGGAGCAGACGCTCCAATCTAAA  
ACGGTCTGTGCTCGAACTTATTATTTTGAAGTTATTGCCTGGCGATCCTGCCAGGAGTTATTACATGGCGA  
ACGTGACAGGACTCACAGGCTGCAGTCTAGTTGAACAAGTGCGAAGTGCTAATGGCATAACGCCAAGTA  
AAAAGCATTAAAACATTGCAAAAAATCAAAGTGGAATTTTGAAAGTCCCAGGCACAACCTAAAAAATTAC  
ATTGAATTCGTTGGCGGTGGAAAGTATCCTAAGGCAGCTGAAGACTTGAAAANCCAAATAATTGATTGCA  
GAGGAGCCCATGTTTCGAGAAAGCTGTTCCGATTGAACAAAGGAATTTGCGGACGTTGCAAAAGTCCTTGC  
AGGCAAATCCAGCCGGTGGACCACTCCCACTCACAATAGCTAAGTACCGGGCTCGACAAGAAAAGAAAG  
CGATACCAAAGCACAAAAGGAGTGAATGGTGAGTGAACTCTTGACGCAACGGCGACTGGTCAAGGAAA  
TGATTCTGTTAGCCAAAGCTACACAGAGCGTCTTCAACACCTAGATCAGCAGCTTCGCGTTGGTGCGAAA  
CAACGCAAACGGGCTGCATAATTACGAACACCCCAATTTGCTTTAACATTAAGTTCTAAAAGCCTATGTG  
AGAAACCGCTGCTTGAAAAANACTAAACACTGATAGGCCTTACACTAACAAATACGGTTAGAGAAAGAG  
AATATTTCTCTTTAATTGAATTGCTTTTATATATATTTCGATAAGAAAACAAAATTTTTTTTAAACGTTTCATGA  
AATACATTTTTTAACTGCAAGAGGTTCTTGTGCGGAGCTTCCTGAACCCTCTTATTCGAACATGAAATGCA  
TATACATATTATATTTATGAAGCTATATGTCAAGTTTGGTTACTCTAGCTCTTGTTATTTACCAAATTGCA  
CAAAAAACAGGATATCGATATCGATTGCTTGGAACGGAGTAACTATCGATTATCGGAAACAAACTCGA  
TCTGCGCAGGCACTAGGAGCATCTACACCTAAAATTTCAATTTCAATTTCTAGCTCTTATAAGTTCTGAGA  
TCCTTGCGNTCGTACATACGGACTGACGGACAGACGGACTGACGGACTGACGGACAGACGGACAGACGG  
ACAGACGGACAGACGGACATGGCTAGTTTCGAGTGGCTATTGGTGCTGATCAAGAATATATATACTTTATG  
GGGTCGGAGATGCTTCCTTCTGCCTGTTACATACATT

>9\_rnd-1\_family-450\_\_DNA\_\_Maverick

AAACGGCATCAACATCAGCAAACAATAACCAAAAATGCACAACGCTTTTGTGAGGTTTGTGGAGTAACGGT  
GGCTCATAATCGCTGGGCACAACATTTGCGGACAAATGAGCACAAAAATAAGGCCTTCACACCGTTGGAT  
GGCTATGTTCAACTTGCGGCATCCGGATTCCAAAACCGGATTAACACCTATTCATATAGCAATGTTTCGGA  
TAACGTTATGTCCCTGAAGAGTTCCTATTGGAAGCAGGAAGTTCATTACTTCCAATAATGGAAAACGTTTT  
AGAGGTGCACACCTCATATAAAAATCAACTTTGAACTTTTCGCTGAATATTTGAAAATAAATAATAAAT  
ACTGATGGTGAAGATTTTGAATAATGATTAAATCCCATCAAACCTGAAATGTGTGTGGCTACGAAGTCTTC  
TGACTTGGAAGAAATATTCGTAAGCCACTCATACATCATAAGTTCAAAGATGGATGAATTCCAAGAGAGA  
GATAGTGGTTGGACTCTCATAAAAAATTATACGTTTGGAATGAACGTCAATAAATATAAGCCGCTAAGAG  
GCTCTAGTTTTATTCCATTACCACGGAAATTGAGCTTGAAGAAAGCTATTATTAATATAAAAAACGACGAT  
GAGTTTTGCTTTAAGTGGGCCTTAATAGCAGCCCTAAAGAAGCTTGCAACATAATGCTGATAGGTGTGCCCC

ATATAAAATCGATGATATAAGGAGTCCAATTATTGAAATTGATGAGATATTCTCACTCAAATTTTCATAATA  
TGAATTTCCATTAAAGCTCAAAGACATTAAATTGTTTGAGCAACAAAATACTTACTTAAAGTATAAATGTC  
TTTGGCTATGATGAAGACATTAATGAAATTATTGGACCACTCTATCTAACCAAAGAGCACCGGGGAAACA  
TATTAATCTATTGCTTTTGGAAAAGCAAGATATATCCCATTAACCTGGATTAAAGAATCTATCAAGGTAAG  
TAAAGAANACAAAAAATATACATTTCTTTTTTAATATCAATCATATTTTCTCCTCCAGGCTTACACACAA  
TCAGTTGACTTCGCATACGAGGAAATTACATTTCTGTAATGTATGCTTAAACTATTCGCATAACGACAGGA  
TGCATGGCGAGCAGTGTGGAAGAGTGGTGGCGAAGCTTCCAACAGCGGATAAAGGCGAGTGTAAAATTTA  
AGAATTATGCAAATAGTTTAGATATACCTTTTATAATTTATGCAGATTTTCGAGTGCCTTTAAAACCTATC  
AACAGGAATGCGAGCGAGAATGTAATAAGCATTCAAGAACACATTCCTGTTGCATACGCATATTTTCGTAA  
AATCTGCATATGATTCTAGTTTAGATAAATTCGTTATATATAGTGGAGAAAGTGTAGGATTACATTTTGTA  
ACATCTCTCATTGCTGATGCAAGAGAGATTTATAGCAAATATTTATCTACTGTAAAGCCAATCGAAATGAG  
CTTAGAAGATGAGCATAAATTTAAAAATGCTATAAATTGCCACATTTGCACTAAATTTTAACTTCGATAG  
AGTACGGGATCATTGCCACTTAACTGGTAAATTTAGAGGGGCAGCTCATAATGCCTGTAACATAAATTAC  
AAAGTTGCCTCATTATCCCCGTAATTTTTCATAATTTTTCACACTATGATGCTCATTGTGTTGTAAGAGAG  
TTGTCAAAGTTGAAGGTGAAATTAAGGTTCTACCTCTCAATAAAGAGATTTACATNTCCCTTTCAAATA  
CACATATATTACAGAGCATAATACAAATTTGGAAATACGTTTTTTAGACTCATTTCGATTTATGGCTGCAA  
GTTTAGATAGTCTTAGCTCTAATTTAGAACATAATAATTCACAACGTGTTAAACGGTTTTCCCGGACGAAA  
CACACTTTAATCTAGTACATAGGAAGGGAGTTTTCCCATATGANTACTTTACTAAATTTGAATGTTTGCAA  
GAACTGCTCTTCCACCAAGGGAAAAATTTTCAACAGTCTTGCAAATAGAGAATGTTTAGATGATGATT  
ATTTACACGCTCAGAACGTGTGGAGAGTTTTTAATTGTAAAACCTCAAAGATTATATGGAGCTGTATTTA  
AAGACAGATGTACTTTTGCTTGCAGATGTTTTCGAAAATTTTCGTTAATTTGCAAGAATATTTATTCATTG  
GACCCAGCCCATTTATTACACAGCTCCGGGGTTATCTTGGGATGCTATGCTAAAAACAACCTGGAATAGAAT  
TAGAATTATTTACAGACATAGATATGCAAAGATTTATACAAAATGGTATTCGTGGGGGATTAGTACAATG  
TTGTCAGAGAATATTCAATTGCTAATCATAAGTATATGAATGATTATGATAGCACAAAACCTCTCAATAT  
TTAATGTATTTGGATTCAAATAATCTATATGGGTGGGCGATGTCACAATATCTTCCATATGGTGATTTCCA  
GTGGTTAAGTGAGGATGAAATACGATCATTTTCATTTATTTTCAATTTCTGAAACGTATGAATATGGATATA  
TTCTTGAAGTAGATTTAGAAATACCCAGCATCCCTTCATGATATGCATAACGACTTGCCGTTTTGTCCAAG  
CAATCAAAAACCGACTGCAAAGTGTACAGTTAAAAAGCTTATCGCTGACCTAAGACCGAAATATAAATAT  
CCCATACATTATAGAAATCTTCAACAATGTATTCATAATGGATTGCGGTTAACTAAGATTTACCGTATATT  
ACGGTTTAAGCAGTCTCCTTGGTTAAGAAAATATATTGATATTAATACATATCATAGAACGCAGGCGAAA  
AATAATTTTCGAAAAGATTTTTTTAAGCTATTAATAATGCAGTATATGGGAAAACCATGGAAAACGTTGAA  
AAACGTAAAAACATTAAATTGGTAACTGCATGGGAAACAACGTCTTGCAATAGATTGGGAGCAGGGGCA  
TTAATCGCAAAATCAAACCTTTCATAGCTCAGTGCAATTCTCGAATAATANGTATGCAATCCAAATGAAAA  
GATTGCATAACTATTATAATAAGCCCATATATTTAGGTTTTACAGTATTAGATCTTTTCGAAATTGTTGATGT  
ATGATTTTCATTATGATTATATGGTAGCAAAGTTTAAATCTGATCTAGCATTAAATTATATGGATACAGAC  
TCCTTAATATATACAATTA AAACTGAGGACTTTTATGCAGATATTAGAGATGATCTTGAAACGAAATTCTGA  
CACATCTGAATATTCTGATGATCATGCTCATAAATATGCCCTAAAGAGAGTTAATAAAAAGTCTTGGGCAT  
GATGAAAGA

>160\_rnd-1\_family-322\_\_LTR\_\_Gypsy  
GACCTTGCATATAAAAGATATGCTATGTTTCTTTAAACATGGTAAGAAAATTATAGCAAGAATTGATATTG  
GNGATTTATACTAATAATGGAAATATTGACTTAGGACAACCTATTTCAAAGGCTCGCAAAAGAAGCCGG  
TATATTA AAAATCAGCCAATTA AAAATGGNACCGTNGGAAAATATCTTTGAAAAGTTTCAATAGTTAAT  
TTCAA AATTATGGGCAATA AAAATATTGAACACATTGAGAGTAGCGCTACTCAACCCGGTGACCACATTAA  
CAAATGT TAAAGAGAAAGAAGCCATATTGTCTACACTACATGATGATCCAGTACAAGGAGGTCACACAGG  
CATTGCAAAAACCTTGGCCAAAGTCAAAAAGACATTATTACTAGAAAGTCATACCTTTCTCGTGATATAAC  
AGAGTACAACCAGAAATGTCAAAAAGCAAAAATAACAACGAATATTA AAAACCTCTTTAACAATTACTGA  
AACCCCGTAAAGGCTTTCGACAGAGTGATAGTGGATACAATTGGTCCACTACCAAAATCAGAACAAAGGCA  
ATGAATATGCAGTCACGCTCATATGTGACTTGACTTAATATTTAGTTACTATACCTGTGCGAAATAAAGC  
GCAGTAGCTGTTGCAACAGCATTATTCGAATTATTTATTCTCAAGAACGGTCCAATGAAGACGTTTCAATTC  
GGACATGGGAATGGAATCATAAAAATTCAATTATAAATGATTTGTGCAAATATTTAAAAATATAACATCAA  
CTGCACATCATCATCAAACTGCTGGAACAGTAGAAAGAAGCCACAGAACATTTAACGAATATATACGATC  
CTTTATATCAGTAAATA AAACTGATTCGGATGTATGGCCTCAATATTTTGTTTATTGCTTCAATACTACCCC  
CTCTATGGCACATAATTTTTGTCCATATGAGTTAGTATTTGGTAAGACTAATAATCTACCAAAGTATNTTA  
ACAGCATAAGTAATATAGAACCTATATAACGTAGAAGACTACGCTAAAGAAAGTAGGTATAGATAAGAA

GTAGCATACAAAAGAGCAAGAAATATGCTCGAATTAAATAAATAGAAAAATAAGGAATTATATGATTTA  
AAAAGTAGGAAATAAATTTGTACTAAGAAATGAAGTAGGCCATAAGCTAGATTTTAAAAACACTGGGCCC  
TATAGAGTTGAAAAAATAGAAGATAATGATAAATAAGAAAAATAAGAGTAAAAAACAAACAGT  
TCATAAAGAAAGGTTAAAAATCTTTAATTCATAAAAGACACACAAGAAAAAAATGTAATTATCACAAGGT  
ACGCAAAGAAAAAATTAAAAAAACTAAATACATTATAAATACATTACAAATATAATAAATCTTCAAATAT  
CAAATNATTTTAAATATAAAATAAATTTAAGTAAAATAAATCCACTAGTTACGTTATTTTTTCGNATAGGAG  
GGAGATGTAGTATGTGCATATATTGAGGGGTACACTGTACCAATAAAGTAACATCGTTTAAGCATAAATAN  
ATCAGCAACACATTGTTGCAGTACACAAACAAAACCNTTTCGAGTGAGCGTGTAATATGATCGCCCGCTT  
ATGAGCTACGCTAAGTCAGCAGTCCCACGCTGACCATTTCGTAGCATATATATATATACATACATGCAAAT  
ATGTACATAAGACTCTCTCTCTCCCGATTATGCTGATAAGACAAAATATGTATGAAGCCGCTCCGCTGCTG  
GCGTAACCGGCAGCGCAGCTATGCGGTCTTAGCCATAAGAATATATTGAATAAAACATTCTAAAAACTAA  
AGTCAAACGGCACAGACGTGCCAGATTCAATTAGCTCGTACCTATTACGTACTACCTCGAGTTTACAAGAG  
AGCACTTGAGGTACGTGCACAAAAAAGCAGCAGAATCCTGTCGAGCGCTATCCAGGATTATGCTCAACAC  
TCGAGGTCCAAAACAGCAGAGACGCAGTCTTCTCATGACAGTAAACAAAGCGGTAATAATATACGCGTCC  
CCCATCTGGAGCAGAGTAATGGCTGTTCCCTAGCTACAGCCGGAGTATAAATTCTATATATCGCCTATGCGC  
TCTACCGGTCAGCTGCGCATTCTGGACGGTATCAGGATAAGCAACGCTGGTTTTTCGCAGGGATGGTCCCGT  
TCAATGAACTGGCAACAGAAGCGGTAGTTTTCTACAGAGCTCTGAATGGAAACAGCACAGCAAACCTCGGT  
TCGCACAGCAGCAAGGATGCAAAGCATGGAACGATGGCATCCACGTTGGGATCGCTCATCTAAAGGACG  
CTGGACACATAGGCTTATCCCTAACTTGGAAGCCTGGATAAACCGCAAGTATGGAAACACTAATTTCCAC  
TTAACGCAGCTCCTATCTGGCCACGGATGCTTCTAGAGCTACTTGAACCGATTCTGGCCTCGATAACACAGA  
CGAGTGTTCTTGGTGCGGCAGTGAAATCGCAGAAAGGCTCCTCACTGTAGGAGGGGAAAAACCAGCAGTGC  
GGCATATCAACCTAGATGTGAAAGATGATATTGCCAGGGTGAAAGGTGATACAGATGGCAGCAACTGCTAA  
ACTACCAAGTGAGCCAACCTCCACTAGGAAGCCGACGCCAGCAGATCCGAGAAAACCACACCCGGCTAAAT  
GTAGATAAACTCAGGATCACAGAAAAAAATCAGCTCACAAAAAAACAACAACAGAGGGCCTGGAAATCAC  
AAATGTTTAAAGGCGGTCCCAAGAGGGGTTGAAGCCTTACCCGAGCTAAGGAAAGCATATCGCAGAAC  
ACAGACGGCTACCATGCTTCTACCCAAGATCGCAGCAAACGAACCTTCTGAAGAAAGCGAAGAAACGCATT  
GGCTGGGTTGTGTACCGTATATGCCAAAAATTGGAACCAAGAAGATGTTTCCAGTGCCTGGACCTTGGGC  
ACACGGCTGCGCGATGCATTAAAGGTTTGCATATGCAAGCCAATGCATAATCTGCACAAGGCACGAGACT  
GCGAACACGGCAAACAACACCCTCAGCCATGCCTGCTCATGGTTAATCAAGGCGTCTCAGGCAACAATCA  
AAAATTAAGTTAATACAAATTAACCTGAACTATTGCAGAGCGGTCCAGGACCTACTCGCTCAAACCTACAC  
GGGAAGAGAACGCTTACTTCGCCATCGTCAGTAAACCACACCAGTCAAACATGATGGCATCTGGATTTCAG  
AGCAACGGCGGCCAAGTATTGCGAAATATGTATATATATATATATATATATAGTTGCTATATTGCACCCAG  
CATAGGAATTACCGCGTTCGCCGATATACTG

>9\_rnd-1\_family-357\_\_DNA\_\_Maverick

TCGCTGGGCACAACATTTGCGGACAAATGAGCACAAAAATAAGGCCTTCACACCGTTGGATGGCTATGTT  
CAACTTGCGGCATCCGGATTCCAAAACCGGATTAACACCTATTTCATATAGCAATGTTTTCGGATAACGTTAT  
GTTCTTGAAGAGTTCCTATTGGAAGCAGGAAGTTCATTACTTCCAATAATGGAAAACGTTTTAGAGGTGC  
ACACCTCATATAAAAATCAACTTTGAACTTTTCGCTGAATATNTGAAAATAAATAATAATAATACTGATGG  
TGAAGATTTTGAATAATGATTAAATCCCATCAAACCTGAAATGTGTGTGGCTACGAAGTCTTCTGACTTGG  
AAGAAATATTCGTAAGCCACTCATACATCATAAGTTCAAAGATGGATGANTTCCAAGAGAGAGATAGTGG  
TTGGACTCTCATAAAAATTATACGTTTGGAAATGAACGTCAATAAATATAAGCCGCTAAGAGGCTCTAGT  
TTTATTCCATTACCACGGAAATTGAGCTTGAAGAAAGCTATTATTAATATAAAAAACGACGATGAGTTTTG  
CTTTAAGTGGGCTTTAATAGCAGCCCTAAAGAACTTGCAACATAATGCTGATAGGTGTGCCCATATAAN  
ATCGATGATATAAGGAGTCCAATTATTGAAATTGATGAGATATTCTCACTCAAATTTTCATAATATGGAATT  
TCCATTAAAGCTCAAAGACATTAAATTGTTTGAGCAACAAAATACNTACTTGAGTATAAATGTCTTTGGCT  
ATGATGAAGACATTAATGAAATTATTGGACCACTCTATCTAACCAAAGAGCACCGGGGAAACATATTAAT  
CTATTGCTTTTGGAAAAGCAAGATATATCCCATTATACCTGGATTAAGAATCTATCAAGGTAAGTAAAGA  
AAATAAAAAAAGATATACATTTCTTTTTTAATATCAATCATATTTTCTCCTCCAGGCTTACACACAATCA  
GTTGACTTCGCATACGAGGAAATTACATTTCTGTAATGTATGCTTAAACTATTCGCATAACGACAGGATGC  
ATGGCGAGCAGTGTGGAAGGTGGTGGCGAAGCTTCCAACAGCGGATAAGGCGAGTGTAATTTAAGA  
ATTATGCAAATAGTTTAGATATACCTTTTATAATCNATGCAGATTTTCGAGTGCGTCTTAAACCTATCAACA  
GGAATGTGAGCGAGAATGTAATGAGCATTCAAGAACACATTCCTGTTGCATACGCATATTTTCATAAAATC  
TGCATATGATTCTAGTTTAGATAAATTCGTTATATATAGTGGAGAAAATGTANGATTACATTTTGTAACAT  
CTCTCATTGCTGATGCAAGAGAGATTTATAGCAAATATTTATCTACTGTAAAGCCAATCGAAATGAGNTTA

GAAGATGAGCATAAATTTAAAAATGCTATAAATTGCCACATTTGCACTAAGATTTTAAACTTTAGATAGAG  
TACGGGATCATTGCCACTTAACTGGTAAATTTAGGGGCAGCTCACAATGCCTGTAACATAAATTACAAAG  
TTCTCCCCGTACCTTTCCATAAATTTTCACACTATGATGCTCATTTGTTTGTAAAGAGAGTTGTCAAAAGTTG  
AAGGTGAAATTAAGGTTCTACCTCTCAATAAAGAGATTTACATTTCCCTTTCAAATAACACATATATTACA  
GAGCATAATACAAATTTGGAAATACGTTTTTTAGACTCATTTTCGATTTATGGCTGCAAGTTTAGATAGTNT  
TAGCTCTAATTTAGAACATAATAATTTCACTGTTAAACGGNTTTTCCCGGACGAAACACACTTTAATC  
TAGTACATAGGAAGGGAGTTTTCCCATATGAATACTTTACTAAATTTGAATGTTTGCAAGAACTGCTCTT  
CCACCAAGGGAAAAATTTTTCAACAGTCTTGCAAATAGAGAATGTTTAGATGATGATTATTTACACGCTCA  
GAACGTGTGGAGAGTTTTTAATTGTAAAACCTCAAAGATTATATGGAGCTGTATTTAAAGACAGATGTA  
CTTTTGCTTGCGAGATGTTTTCCGAAAATTTTCGTTTAATTTGCAAGAATATTTATTCATTGGACCCAGCCCA  
TTATTACACAGCTCCGGGGTTATCTTGGGATGCTATGCTAAAAACAACCTGGAATAGAATTAGAATTATTTA  
CAGACATAGATATGCAAAGATTTATACAAAATGGTATTCGTGGGGATTAGTACAATGTTGTCAGAGATAT  
TCAATTGCTAATCATAAGTATATGAATGATTATGATAGCACAAAACCTCTCAATATTTAATGTATTTGGA  
TTCAAATAATCTATATGGGTGGGCGATGTCACAATATCTTCCATATGGTGATTTCCAGTGTTAAGTGAGG  
ATGAAATACGATCATTTCAATTTATTTTTCAATTTCTGAAACGTATGAATATGGATATATTCTTGAAGTAGAT  
TTAGAATACCCAGCATCCCTTCATGATATGCATAACGACTTGCCGTTTTGTCCAAGCAATCAAACCGACT  
GCAAAGTGTACAGTTAAAAAGCTTATCGCTGACCTAAGACCGAAATATAAATATCCCATACATTATAGAA  
ATCTTCAACAATGTATTCATAATGGATTGCGGTTAACTAAGATTTACCGTATATTACGGCTTAAGCAGTCT  
CCTTGGTTAAGAAAATATATTGATATTAATACATATCATAGAACGCAGGCGAAAAAAAATTTGAAAAAG  
ATTTTTTAAGCTATTAAATAATGCAGTATATGGGAAAACCATGGAAAACGTTGAAAAACGTAAAAACATT  
AAATTGGTAACTGCATGGGAAACAACGTCTTGCAATAGATTGGGAGCAGGGGCATTAATCGCAAAATCAA  
ACTTTCATAGCTCAGTGCAATTCTCGAATAATATGTATGCAATCCAAATGAAAAGATTGCATAACTATTAT  
AATAAACCCATATATTTAGGTTTTACAGTATTAGATCTTTCGAAATTGTTGATGTATGATTTTCATTATGAT  
TATATGGTAGCAAAGTTTAAATCTGATCTAGCATTAATTTATATGGATACAGACTCCTTAATATATACAAT  
TAAACTGAGGACTTTTATGCAGATATTAGAGATGATCTCGAAATGAAATTCGACACATCTGAATATTCTG  
ATGATCATGCTCATAAATATGCCCTAAAGAGAGTTAATAAAAAAGTCTTGGGCATGATGAAAGATGAGAA  
TAATGGTAGGATAATGAAAGAATTCATAGGACTTCGATCCAAAATG

>9\_rnd-1\_family-407\_\_LTR\_\_Gypsy

AAGTTAACACATAACACTTAATATAGGATATTTTATAAGTTTATAATCAACCCTCGCTATCGCGTGCTTCA  
TAAGTTAAGGAACAGCCCTCGCAATTGCGACACTGCATACTTTGTATCAGCGCGCTATAGCTGCAATGGTC  
AGCGGCGGTAAACGGACACTTTTGTGTTTGCTGCAAGAGTTTCCGTTATTGCCTAAGATTTTGCTGAGTCGG  
CTTGCCGACCATGACATTGTGGCGTGATGCGAGTTTGGCTTAGCTTAAGTGAAATATTCTGTGTATTAAG  
AAATTAGTTTTTAATTCGGCTTTCACTGAGGCACATCGGCCAGGGACTTCGCGCTTAAATTAACCTCACTC  
ACTACGGCGTATCGGCCTAGTGTTTTATAAATAACCAAATAAAGTCCTATAACGAAAATCCGCGAAGAC  
CTTTTTATTTNAATATTAATTGGCGCCCACTAGTGGTAGTTACGATTACCCACGCGATTGCAAAGAAAAA  
AATTCTTACAAAGTGAACATTAAGTCGCGGTACACCAACAGTGCCGCGCAGTGAACATTACAAAAATAA  
AATAATAAAAAATAATAAGCTAATCACTAATAATAATAAGTGACAGTGAGTTAACAAATGCAGTTGCG  
CAGTGAACACTACAACAAGAAGCAATAAGCTGCAGTTACAGTGAATTAGCGATCATAATCTCGTGATTCA  
CAAAGGTGCGCTCAAGCGCAGTGCGATTTACATATATTTTTACACCGAAGCCGCTGGAGCTCTTCGGGCA  
GCGGAGACTGCGGCGAAGGGAGCGACTACGAATAACAAGTGCGTGACTGCGGCGTTGGACCCGCAAACG  
TGGCTGGTGTAGTGACTAAAATAAATCATAAAAATCATGTAAAGTGGGCACCTTAGCCAAATCTGTTATTA  
AATCTGATCGAATTAAAAAAAAAAAAAAAAAAAAAAAAAAGAAACAAAGAGAGAGAGAAATCTTGATGCGTT  
ATATTTTGCAACAAATCATCTGCTAGAGTAAGAACAAGTTTTTTGAGAATTCGATTTGACAGCAGTAAA  
CAAATTTTGTAAAAAAAAAAAAAAAAAAATACTTTGTGTTACTTTTTATGCCACTCTAAAAATTGTGCTGCAACGG  
CACATACTTTCTTGCTTATGCGCTTCTCGTGTTTCAGAGCTGAGGCGTAATTCGACCCATCTTTCGACTTTC  
TGTTTTGTTTTTGCGTCCGCTAGACCGCGCGTGCAATTTATTTGTTTTGCTTTNAATGCCCATGAAATCGTC  
TTTCGGTCAGTATAGGACCCCCCGCAAGAACTCTAGCGACTCGGATTCTGACTGTGACAACCGCATCAGA  
ATCCCGGCTCCACGACTTGCCCCCTACAGTCCCCCAACTTCGAACAAATGGATCCAGAGCAACTTAGAGA  
GATAATTCAAACGGCCATAAGCAATGCCCTAACAGAACAAGCCAATGCAAACCAGCAAAGAGAGCAGCT  
ATTAGTGACAGAGAATTAATGAATTATCCGAACAAATGGCAGCAGCAAACGTTGCTGCCCCACAAGTAGTA  
GCGTATGCTGCTATTGAGATTAGAAATGACATTGCTGCGACGAGCCACTAGACGCCGTCAAATGCTTAC  
CTGAGTTTGCAGGAATACAGGAATCTTATGTTTCTTGGAGGCAAGCGGCATTAGCCGCCTACCACATTTTC  
AAGCCATATAATGGCAGTTCTCGGCATTATCAGGCCGTTATAATTATAGGAAGCAAATAAGGGGGCCCCG  
CGGATGCGGTGCTGGCCTCATTTGGCACTGTGATAAATTTGATGCGATAATAAATCGCCTTGATTTACA

TACAGTGACAAAAGGCCGATCCATGTAATTGAACAAGAGTTAGGCACCTTGAGGCAGGGGCGGCTTGCCCC  
TACTCCAATATTTTGACGAAGTGGAGAAAAAACTAACCCTACTGACCAACAAGGTCAATATGTCTTACGA  
GCCCCGTTATGGCAAAAGGTCTTTGTGAGAAGTTCCGTGACGACGCGTTGCGCGTTTTTCGTATCGGGGCTTA  
AGCGCAATCTCACGGATGTGCTCTTCGCAGCCAAGCCTAGAGATCTGCCTTCGGCACTGGCGCTTGCTCAG  
GAGGTGGAGTCAAACCACGAAAGATATGCTTTTCGCGGCTAATTTTGCCAAAAGCCAAGAAGAAAAAGAG  
CGTAGGCCGAATACAAAGACACAGGGCCGACAGCAAGATAGACATTCTGAGCCGCAGACAAATGGCGCA  
AAAAACCCTCATTTCAACAAACAGCAGAAACAACAGGGTCAGTCCGATCAACGAAGTGGTCGGCAGCAA  
AACAATAATGGTGGACAGGAACCCATGGAGGTAGATCCTTCATTTTCAAGGATCCTCCAACCCACACAGG  
CACCGGGGTATCTGAATAGAAAACAGGCAACATCTGATCACACGGGGCTTTCAAAAAAGCAACAAAGGGT  
GAATCATGTAACGCAGGACGCGGAACAAGGATCGCAAACGTATGCTAATGCCGCCTCTAGCGCAGAGGC  
GCAAATTGAGGATGACGTGAGCGCTAGCTATGATTGAGATGCTGTTAATTTTTTAGGGGTAGATCCCTGTT  
ACCCGTCATCGGGCGAAGAGTAGCAGGGGGCCGATATGAAATTCCTCATAGACACGGGGCGCGTCTAAAAA  
CTTTATCAGACCACATGAAGGGTTAAAAGGCGTCCGACCAGTAGATTGTCCATTCACAATCCACTCGATT  
ATGGTACAACCTAGAATCACGCAAAAATGTTTTGTCTCAATGTTCAACATAAAGGCAACATTTTTTCTTTTA  
TCGGACCTGTCAACTTTTCGATGGAATAATAGGCCTCGACCTGTTAACACAGGCAGGGGCATCGCTTTGCTT  
AGCGTCAGGTCAGCTTAAATGGGGTTCAGAAATTGAACAAATTTCTTTTACGCATGCACTAATGTCAATT  
TCACTAACGTAGATTGCTCAGATGCACCTCCTTTAGTAAAGAACAATTCCTGAAACTGCTAAAGGACAG  
GAAAAGGGCCTTTGCAGACCCCAATGAGGCCTTACCATAACAATACGTCGGTGGTGGCCACTATAAGAACA  
ATAAATGAGGAACCCATTTATGCAAAGCTTTACCCATATCCTATGGGGGCGGCTGACTTCGTCAATAAAG  
AGATTCAAAACCTGCTGAAAAATGGNATCATACAGAAATCAGTATCTCCCTACAATAATCCTATTTGGGTT  
GTGGATAAAAAAGGTACAGATGAGGCGGGTAATCGAAACATGCGATTAGTAATGGACTTTC

>160\_rnd-5\_family-4267\_\_LTR\_\_Gypsy  
AAACGGAGTGAACCTATAAAANAACGAAGTGTAAGACAAGTTAAAGGAGCGAGAAGTTAAAGTTGATGAA  
ACAGAAAGTGACTGATTTTGTCTTACTTTTTTTGGTGGCGTGACCGGAAAAAATAATAAAACAGA  
ACTCTNANAATAATAACAATTGTCAATAATTGGCGGAGTTTTTTTAAACAATATTAACGAATCGAAAATA  
ATNATTGACAATAATCAGTGAACCTATTTTGTCTATTTTTTTTTTGGTGGAGTGACCAACAAAAA  
AAAAAACNCAGAGTGAGCGGAGAGCCTAAAATGGAATCAGGTGAGTGCCAAAACCCGGGGGTAGGCGTG  
CGTTGGATCCACCAGCGACGCAAGGAGGAGCTGGTGGCCATCGCCCAGGAGTTCGGGCTAGAAAAGGAA  
GGGCGCGTGGAAGAGCTGCGTAGGCGGCTGTCCACCTACGTGCAGGAGGGCGGCCATTTCGCCATTTCGGAT  
CTGGGCTCGTCTTGCCGAGCTGGAGTCTCAGTTCGCGAAAACGTTGGAACCGCTACCCTGGGGTGTTCCAT  
CTGACGTGGACGACCGCGCCAAAAGTCAGAGCCTGACCTTAGGAGCTCGCAATTATACGGGCGTCCGCAG  
CCGCCTATCCCTGGCGTGGCCGTCACGGGGGTGGAAGAGGCTCNCGATCCCGGGGAAAACGGGGATCGC  
CGAGCNACCACGACCAACGNNGGTATGGGGCGGAACCCGACCGACCCTAATGACGTCCCCTACGCTCCCC  
AACCATATTCTCGGCCGGAGGTTAGGCCTTTCNCAAACGTTCCGGAACAAGTTCGGAAGTGGGGCATGAG  
ATACGATGGCCGCTCCGACCCCTCGGGTCTTGAGGACCTAGAGGAACGAGCCATTACGTATGGTATC  
GCCCTCGATAGATTGCCCCGGGTAATGAGCGAGGTGTTCTGCGACAGGGCCGCTCGGTGGTCTTGAGCA  
GCGGGCTTAGAGATGTGCCATGGTCGGTGTTCAGGAGGGGCTTCTTGAGTTCCTGCCCCACGCTAC  
TTCGAAAGGCTTGAGGCGTGGGGGAGGAGTTCAAGGAGTACCTGATAGAGCTGAGAGCTCTGATGCATCA  
CGCCAGATACGAACCGGCACAGGAGTTGCACCGGATCTACGAAAACGCCGCTCCCGAATACAACTCTAC  
GTGCGTCGGCAAGATTTCTCCACCCTGTNCAGCTGACCCAGCTGGCNGTGGAGTACGAAACGGTGATGA  
GACAGCGAGCGGAATACTCCGGAAGCAGGGCAGGGAGTCAGGTGGTTCGCGAGCTCAAGTAGCGCGGAGT  
GGGAAAGGACGGTACAGCCCCCGGGGGGACACCTTAACCCGTTCCGGTCTACTCCCATCGGATCCGGAGC  
GATCGTTGTGGATAGACAAGGTCTCCGCCCCGCCGGCAACGGCCCCCTGCGGAAGTGGCCCACCGAATGAT  
GAACCAAGAGGCCGGAACCGGGTATGATCCGCGACGAGCATGTGCGCAGGTGCGCACAGGAGGGGCACTT  
TGCCAGGGAATGTCCCAATGCGCCCCGTTTTGTTTTGTTGGGTATGTGGGCACCGGGGCAGAAGTAGCCAG  
GATTGTTGTGCGCCGACGGAGGCGGGAAACGGGCAACGGCGTCGCCCAGGTCAGGGTCGGGTCGACGCC  
GACACACACGGGACTCGGTAGTAGTACACCCGCTTAAGGTGGAGGGTGGCCGGATCGTCGCCACGGTGG  
AGATTGGCGGGCGGGCGATGCCTGCTACTATCGACACAGGGGGCCACTCGCAGCTTCATGAGTGAAGACTG  
CGTACGCAAGTGGGCGATTTCGGGGGAGAGTGGAGAACGTACAGGCGCGCATTCGTCTGGCAGATGGGTC  
CACGCTCGAAGTAGGGAAGGCATTGAGGATAGACGTCCGCCTAGCGGGGAAGGCGGTCAGCATGTTAAT  
GCTTATCATGCCCGCAATGCTGGACCACGTCATCCTGGGGATGGACTTCTTGGGTGCGATGGGCACTACG  
ATACGCTGCGGCGAGGCGGAGACGTCTCCGGCCGCGGGGCCTGGAACCANGAAAGAGCCGAAAGAAGGC  
CTCTCGCGCCAAGGAGCGGGAGCGCTGCTCGGCAACCGACGGCAGAAGAGACNAAGAAGGAACCGAAG  
GAAGGCCTCCAGGTCAGGGAAGGGGAGCACCTGCTCGGCAACAGAGAGAGGACACCAAGAGGGGAACC



GGAGGAAGGCCTCCCAGGTCAGGAAGAGGGAGCACCTGCCCGGCAACCGATGGAAAAGGGGAACGAGAA  
AGAGACCGTCGAAGGGGTCTCACGCNNGATTGGACCAAGGCGCTTAAAGAGTCCAAAAGGCGGGCGGGTA  
GACTTTCAGCGACAGGTCTACGCCGGTCATGGAGGCGGCACGGAAAGGTGCCAGATAACGGAGGGGACTA  
GGAGCAATGGCTAGAAATCCATACGGACACAGGGGATCAGGAGCGACTGCCAGAGGGGTAGCGAGAGAGG  
GTTGTGGTGCCCCGAGGAGGCGAGAAGCGAGCCCAGCATCGAAGAGGCAGAGTGGCCCCGCGGATCTGGA  
TCCGGAACCTTAGGGAGTTCTTGGAGTCGGAACCTGGCACTCTTCGAGGGGGCTGCAGGGGAGTCTCGCATATC  
GCGGAGCACAGGATCCGGCTAAAGGACGACAANCCATTAACACAGCGATATTATCCGAAGAATCCGGCC  
ACGCAGAGGGGTGATTGACGAACAGGTAGATGAGCTGATCCGGGCAGGTGCCATCGAGCCGTCGCGTAGT  
CCGCACAGTGCCCCAATCGTCTTAGTCAAAAAGAAGACTNGCGAATGGCGCATGTGCATCGACTACCGGC  
AACTCAACGCGCATTCCATCCCAGATGCTTATCCTGTTCCAGGATTAATCACATCCTTGAGCGGTTGCGT  
CACGCCCCGGTTCATCTCCACTCTGGATTTGAAGCACGGGTACTGGCAGATACCGATGGCAGCCGATAGTC  
GGGAATGTACGGCGTTCACGGTCCCCGGAAGAGGTCTTTTTCCATGGCGGGTGATGCCATTTCGGTTTACAC  
TCGGCGTGTGCGACCTTCCAGCGAGCCTTAGACACGGTTATAGGGCCCGGAAATGGAGCCTCATGCGTTTCG  
CCTACCTAGACGACATCGTGGAATAGGGGCAACGAGAGAGCAACATGTAGAGAACTTGAGGGAGGTGT  
TCCGCCGCTTAAGGGCGGCTAATCTCAGGCTGAATAGGAAGAAGTGCAGTTTCTTCAGGGAGAGGTTGGT  
TTACCT

>9\_rnd-5\_family-2230\_\_LTR\_\_Gypsy

TATAAAATTGTGCGGAACCTTCTCCGCTCAATTAGAAGTATAGCCCGTAAAGCTATGCGAAACAATAGGT  
AGGAAAATGTAAACATAAATGCAAAATAATTCAATTAGCAAATTTGATGAAAATTTACCTAATAATTAT  
AATTATAATTTAATTATATATAAACCCAAAATGGGACTAGTAGACTTAAAGACAGTGGATTCCACTGCTA  
ATGTCATTAATAAAGTAGAGTCAAGTAACATGGATTTACAATTAGTAAATATACTATTGATAATAATTGTT  
GTTATAATGTGCGCCAATTGTTTTTATAAATTATACAAGTTGCATAACAAATGCTTAAAAAGAGGTATATG  
AGCCAGGCAAATGATCTGGACAAGATTTAAATTAAAAAAGAGCGCAAACAAAAAAGAGGTATATG  
ATTTAACAATAATTCCGTAATTTACTTTGTAACCATTGAGAAAAATGAAATAAAATTAATAAAATCAAAT  
ACAAATAAAAAATATATATAAATATGGCTAAACTAAGGACAATTAGAGAACTTATAATGGAATGGAAT  
GAATTATATCAAGAACTAAATAAAAAATAAAAAAATTGACTTTGGTAAATCATATAAATCACTTAACCAA  
AATAGGCCAATTCAGAAGAATACTGTTAAGAAACATGCAGAAATATTAGTAAAGTGCTTTAATGAAGCAC  
GTATATTAATACATGGCCAAAGAGGAAAATTAATAAAGATCATTGGTCCAGAGTATCCAAATTTTTGAT  
CAGACTTCGAGCGAATTTAATATCAATTAAGCAAAAATTCGATATTAGATATATCAGTCCCGACCATACTT  
AATACTTCTCTAACAGTTGCAACTGATGATGAACCGGAATCAACAGAACCGGCTGACATTGAACCAATAT  
ATTTAGAAGAGTTAGAGTTAGAGTCAGAAGAGTTAGAGACAAACCCCAAAATAGAAGAGCAAGATTTAA  
ATAACCTTACTATTCCAGCAGTTTTAATGTCAGATCTGGATGATAATACAGATTCTGATACTAGTTCAAGC  
ATAATAGAGAATAAATTCAGTAATAATATCACAAATGGCACAATCCAATATTGATTTTATTAATACTGCAT  
CAAAGCTTATACCAGTTTTTCGATGGTAAAGCTGAAAACCTTAACAAGTTTTTATTGATGCATTGCACATAATA  
GAATCAATAAAAGGCGAACACGAACAATTAGCAGTTTCAATAATAAAAAACCAAGCTAAAAGGTGTTGCC  
AGAAATATAATCGGAAATGAAACAACAGTAACTGAAGTCATTACCAGATTGAAAAGCAATGTCAAAGGC  
GAAACTGTAGAAGTATTGTCAGCAAACTGATGAACCTACAGCAACGCAACAAAACCTGCAAACCAATAT  
ACATTAGAGATTGAGCAGATGACAAAAGCTTTAGAAGGTGCGTATATAACAGACGGTTTAACCTAGAGT  
TAGCCAGAAGTTATTCCACTCAGCATGCAGTCAAAGCAATGATTAAGAATTGCACGGTTGATAAGGTAAA  
ACTTATCATGCAAGCTGGTACCTTCAATACAATGAATGATGCCGTATCCAAATTTGTAAATAGTTGCACAG  
AAGCAACTGGACAGCCGAACACTGTCCTATATTACAAAATTTATTCACAGCGCGGCGGAAACCGCGGACG  
AGGAAATNATAGAGGTAACCTTTCGTGGTTCGTAACAACCTACAATAGTACCTATTATAACAATGGACGAGGC  
CAATATAGAGGAACTCAAGAGGCCGTGGCAATTCGAATCGAGGCCACAACAGCAATACCTCAAATAGT  
GTCCGAGTAGTCAACAATACATCGGAAAACCTCACAAAACCTTTAAATGCTCAACAGTAGAAGATGCAAG  
GGTTCACACCATTAATCTCAGTCAGAACATATTCGTATCATTCAANCATGTGGCTACAGGAAAAGAACTT  
GTCTTTTTTAGTAGACACAGGTGCAGACATTTCAATAGTTAAAGAAAATTCTGATGTCTTTCAAGACATACA  
AGATAATTACATTATAGACATAAAAGGAATAAGTGAAGAGGTTATCAAGTCCAAAGGATTAACCTCTATT  
GAGATACAGACCACTAAGTATATAATCCCACACGATTTTCATATCGTGGATTTACAATTCGCTATTCCTTG  
TGATGGCATAATAGGAATCGATTTTATTAAAAAATACAACCTGTCAATTAGACTTCAAGCAATCTGAAGAT  
TGGCTTATAATTAGACCTAATAACTTAAAATTTCCAATTTATGTTCCGATAACATACAGTTCTGGCAACAA  
CTCAATACTTCTGCCAGCAAGATCCCAAGTTATTAGAAAAATTCAACTAAATTCAAAAAGAGGACAGTGTA  
TTGATTCCAAATCAAGAAATTAACATGGTATTTACATAGCAAGTACCATAGCAACAACCTGAAANNCGTT  
TTATAAGACTACTCAATACAACAAATAAAGATCAAGTAGTCAGTGCAAACAACCTTAACGTATGAATCACT  
TTCGAACCTACGAAGTAGTCAAACTAATACAGAAGATAGGGAAAAGTCTGTATTATATCAACTTTCAAAA

AACTTTCCACCACAATTCAAGTCACAGCTTTCAAGCTTATGCACCNAATATAATGATATATTCGGATTGGA  
AACAGAACCAATAAGCACAAATAATTTTATAAACAAAAACTGAGATTAAAAGATGATGAACCAGTGTAT  
ATAAAAAACGACAGAAGCCCACACAGTCAGGTAAACGAAATACAGAAGCAAGTCGGAAAAATTGATTCA  
CCGACGGGATTGTTGAACCATCCGTATCTGAATATAATAGCTCCATTATTACTTGTCCCCAAAAAGCCATC  
TCCAGGTTTCAGAAGAAAAGAAATGGCGATTAGGTGATTGACTATCGTCAAATTAATAAAAAATTACTGTC  
CGATAAATTTCCACTCCCNAGAATTGATNATATCCTAGAACAAACNNGGACGAGCAAAATATTTTTTCATGC  
CTTGACTTAATGTCAGGATTTTCATCAAATTGAACTCGAAAAAGTTCAAGAGATATAACGTCNTCNTCAAC  
GAGCAATGGCTCGCATCGCGCTTCACGCGATTGCCTCTTCGGACTAAAAAATGACAGCGCCTAATTCATTT  
CAAAGAATGATGACTNTTGTATTCTCTGGACTAGAACCCTTCACAAGCATTCTTTTATATGGGTGACTT  
AATAGTTATAGTTGTTCCGAAAAACATA

>9\_rnd-6\_family-395\_\_LTR\_\_Gypsy

GAAGAGGACCTGTTTCATTGTTTCGGCGCTCCCGAAACTGTAGTCTCTGATAATGGAGTACAGTTCAAGTC  
GCATGCCTTTAATAATTCAATGCAAAAGTATAGAATAAACCATGCCTATACAGCGGTCNACGCACACNGG  
CTAATGCCTCCGANCNAGTTANTAGNTCTGTGATTTCTGCCATNANGGCTATATTTATCNCAATCAATCGA  
ACTGGGACGAAAAATTTGAGTNAAATTTGCTGCTCCTTACGGCTCAAAGCTTACATACAGCAGTAAATAAT  
ACCCCGTATAGACTTGTCTTTGGTCAACATATGATAACAAATGGTTCTACCTTATCGGCTTTTACGTGACCT  
AAACTTACTCGAGGATCGTGCCGTGTCATTCAACAGAGACGATTCTTTCGATTTAATGAGGAACAAAGCG  
GTCAACGTGATGCACAATCAACATTCACGAAACGAAAAGCTTTACAATTTGAGAAGCCGANAGGTCTCCT  
ATGTCGTTGGACAGGAAGTCTTTCGCAGAACTTTCAACAAAGTAATTTTGCCAAGGGGTTAATGCGAA  
GCTCGCCCCGACATTTCGTAAAAGCAAGAATTCGTCTAAGCTAGGAAACAGTTATTATGAGATTGAAGATA  
TGCAGGGTAATCTAATTGGAAAATATCATGCAAAAGATATTGAACAATAACTTCTCTTTCAGTCCTTGTC  
CAAGCGCTTATCCCCCTTGTGGTACCCCAAGTGCGATTTTTGGTTCGGGGAGGCTTGTAGTGGCGCTTGTTA  
NCAAAAATTANTTGACTATTTTTTTGTGTGTGCCCAAAAGTAGGCAATGGAATTTTCGTTAATGCAGTTNT  
GACTAACAAATTGGTTTGACACTTAGTAGTAGATTTCTTTTTAGTTTTTTAGTAGTATTTTTGTTAATTATTGT  
AGTTTGCCTACCTACGCAGAAAATGACAACAAAAATAAAATATAAATATAAAAAATAATATAATATATATA  
ATATAATATATANATATATTTATATTTATTTAAAAATGTTAGCTGAAATATAAACTACTCGATTACACTT  
GGAAATTGCACACTTGTGTTTCGATCTACAAGAAAAAAATGCGTGTCTGCGAATTTTCGACACGGTGAGGT  
TAGATGACACTTCCGCAAGCCAGACTCGACCTTTCTACCAGTGATTGTCAACCAGAGCAGTCGCATTTAAT  
AATTTTGCNTAAAGCTTAGCCTAACCTGCAAGCACGTTTTTGTATTATTTTTTTGTGCTAAATTTAAAAATA  
CAAGGCTAACTCCCATTGGCTTGAGTCCATGCAGGCAGCTATCCAATTGGTACATAGCTGACCGTAGTTTG  
AAAAAAGCAAAGCCCACAGTCGGACGGAACAACCTTTCCATGTTTTNATTTTTTGGTGCCAATCCCAAAGG  
GTAAATATTTCTTTCTTCTTGCGGACCAGCCGCTCGTTGCTTTTGCGCTGTGTACTTTTTCTAATTATCATTT  
TTCTGGTGTACACAGATTGGCACTTATACAGAACTCCTAAGCTAAGTTTCTCACTCTCTGAAATAATCGA  
GCAGAANCGBAATTACGGGCACAGGGAGCATGGCAGATCATCGCCACCTGACACAGTAGTGTTTCGGCAT  
GTGTTAAACAAGCACGGATCGACGCACACAAAAAAGAAAAAAATGTTATAAGTTAGCAAACGAAAGTG  
CCGCCGTTTGTAATAGTCCGAGCCATAACCTGCGGTGAAAAAATATTTTTGATTTAACAAGTTTGCTATGCT  
CGAATAATTTAATTGAATAAGTTATAATAGTTAATTACCGAGCGGCCAACCTGGCGACTAAGAAGTTGCA  
TATTTTTTTGTTTTGTTTTCGATAATATTCCCCTTTTATTTTTTTTTGTTTTTTGCGTTGGGTATAATGTGCTA  
AAGCGAAAAGTTGCCGATTTAACAATAAGTGAAAAGCAAAGTGATTTTTTGTGCGCAAATGAAANTTTTA  
AACTTTAATTTCATCTAAAACAATGCGTCAGAAAAATAAACCTGCTTTAAACATATTTATAAATACCAC  
TCGTATGGACACCGCCGAAAGTACTTTCGTGCTGGATCTGCTAAATGGTAAGCTGGAGCACCCCATTTATA  
ATTTACAATTGTTCTGTTTGCCGAGGGTATTGCTTGGCAGGTTACGAGCCAAAATAAGTTTTTATTTCAA  
CAGCCAAATGAGCATGCGAACGACAATTTTAAACAGTTGTTGTTGTTTTATCGTCTTGTTGTGCCAAAGCG  
TGAACCGAGCGTATGTGAAACCTGAGTAAACAACGGTAAAAAAAATTGATAACAAATTGGCGAGCGTT  
TGATCAGTCGCATGCAATGCATATCAGCTGTGCACCGTACGGTAGTGGCACTAAATATTAAGCACACCTC  
CGGTAAATTTATTAACAGCTAAAATGGCCTTTAGCCGCATAATATAATCTGCATGGCTTAATCCTACTTT  
TATTATNACGATACATATTTGTGTCTTTTGACATATTTGNATATATAAAATATACATATTAACCCTTACTGT  
TTTCAGCAACTTTTTTCGCTTCGGTATAGTAATAAAATAAATCAACTAGTTTTTGGCCTAGAGTAAGCAAAA  
GATATGTAAAATTTGGTTAGTGGTAGGGAAGCAACTATAATATAAATGATCATTGCTTCTAATTTAAA  
GTAAAATTAACCTCATTTATATGTTGTAATAGTTTTTGGAAATGTTAAGGAATAACCACAACCTTAAATGAAAG  
ATCTAATTGACATAAATAAAGAAGTTACCATGAATTCTAACTAAGACCTTTCCCATTCGGGGATTTATGA  
AAAGCAGACTTGAGTCAATGTAAACAATATCGAGGGTGTACAAGGGATCGTCTCAAACATGTCTTGGCCC  
TTGGACGATCATGGTAGGGTGGGCATACGCTGCTTCCAATTTCCATCTCTGGGGTGGCTATCGTACACTAT  
ACATTCATAAATAAGTGCAGACCTACTTTTTTTTTCTTCTCTTTTCTTTGTCTATGATGTCGTTCCAACCGAT

TGATAGGCGACCTGTTCCCCAAAACAACACGCGAAATTTTAATAATTAATAATTTTCGAACGAGCATTGGA  
CATCTCGGAATTTTCTGAACCCCCATCGCCGACGAGATAGAGCCGAAAACCTAACGCGTGCTCCGTAAG  
GTGTCTATACTTCTATCAGCTCGACTCTGCAACTATCCTACGTTGTATGTTATA

>9\_rnd-1\_family-338\_RC\_Helitron

TTTTTATACCTGAACCCATTAAAAATGGGTACAAGGGTATATTGTATTTGTGCAAAATCCAAATGTATGT  
AACAGGCAGAAGGAAGCTTCACCGACCCCATAAAGTATATATATTCTTGATCAGCATCAATAGCCGAGTC  
GATCTAGCCATGTCCGTCCGTCCGTCCGTCCGTCCGTCCGTCCGTCCGTCCGTCCGTATGTATGAACGCAC  
GGATCTCAGAACCTATAAGAGCTAGAGACTTGAAATTTTAGATGTAGATGCTCCTAGCTCCCGCGCAGAT  
CGAGTTTGTTCGATAATCGATAACTTGCTCCGTTTCCAAGCAATCGATAAAAATCGATATCGATATCCT  
GTTTTTGGGCAATTTTGGTAAATAATAAGAGCTGGAGTCACCAAACATGATATGTTGCTTCTAGAATATTA  
TATATATGTCAAGTATCTTTCATTTTATACCTATCGCCACCCCGCTACCACCGCAGAGCTATAAATCAAG  
TTAATAACCCAACTTGTATCGCCAACCAATATAAGCTAGAATTTAAATGCAATTGACTTTTTTCAGAATACA  
CAAATATTCTATGGTACAATAAGATATACTGTATAAAATTTTCATCAAGATCGGTTAAGATACATAGAAGTT  
ATTAAGAAACCATGTGGTTATATGTATATGTACATATATATTGGCAGGCCACGAGTCAGCGGCAGCTGG  
CACAAATTTCTGTATACATGTGCACTAATACACACAAAAAGAATTACAATTGCGATTGCATCGTATGCTCT  
ATGTACATATGTGGTCCTATTTTAGTTTCAAGTTTTTTTCAATTAGTAGCAACTTTCCGGTATGGCTGCAAGGTA  
AAAAGCCACGGGAAGCAGTTCAATTGTTATATGTCTGGAATAAGCGGCGCAAGTTCAATTCCAATGGGGA  
AAAAGAATTTTTTGACTATTTATTATTTGTCTAATAATGTTAGTTTTATTCCTTCACCCATTAAAAACGGAA  
ATAAGTCAAGAGAATGNCTTTTTTGCTTAAAGCCCTAGTAAGCTTGGCAAGTGCGTAGTGCGAGCTATTTT  
AGGTAAGGTATGCATAAATATCCATGCATCTTAATCACTAAAATGTCAATTTACGCAAAATTTAATTTCT  
CATTCAGAAATCATATTCTTTATTAATCTTACAAAAGAATGTAATCATATGTATTTATATCTATTTTCATA  
CATACATACGTTTTAGGCTTAGGCCTAACCGAGTGCGTATACACATACGTATATACATTATAATAATTTACA  
TATGTACATATGTGTGTTGTACACATTATTTTTTCTTCCCGCAAGTAGTCGAAGACCACGAAGTGGAAGT  
TTTCAACACTGTTACTATAAATCTGCGCGCGTAATTTGAGAATTTTATTTTCGTAAATATTTATTATAGTTAC  
ATGATTTTAATAATTCATAAGACAGTCTTAAGGAGGTTGACTGATGCATTAATAAATATTATCATTAGATT  
AATGTTATTATATATGTGATTATAATAATAAATAAAGTAGCGCGCGCATTTTCGATATGTATACTAAATCGT  
GGCGTTAGGAGAGTGAATATTTCCCAACACTCTCTCTTCAAATGTGCTCAGAAGAAGCAGTAATCGATTTA  
GTCTGTAGCCTGCGATTGCCATCAAACCTACCACTAACCAACAGCATATAGATGGAACGTGCCGTAGAAG  
CAAAATGGGCACAAAAAGTGCCGTGTTTTGGTTTTGTGATTTGTGATTTTTGCGTTTCTTACTGATCTAACAA  
CGATTTTTTATTCGAATAAACTATATTCTATCGGTTCCGAGCGGTTGAAAATAAATAAATTCAGTGTTTTT  
GTGACCATTTTAATAAAAAACAGTGAATTATCGATGAATTACCGATAAAAAATAGTTTTTCGGCCGTTACAAC  
TGGCGTGTATGTGCAAGTGTGTGATTGACACTTATTAGGAATCGTATTTGTGCGAATGCAATTCACACAGC  
TGGTGTGTAAGGGAAGTTTTGGAGAACCATTTTAGCTGAAATCGCAAAAATCGCAAGTTTTAAATATAA  
TTATAATTTTAAAGTCTTTTTTAAAGACTATACAAATATTACCTACTTTTTTATTTATTCCAGACATATATATA  
TATCTATATATACATATAATATATATAAATTATATAAATTAATTTTAATAAATTTTATTGCAAATAATTTAT  
TGGAATTAATTAATTTAAATTACGAATTTTACTATATTACATTTTTTTTTTTTTTAAAGTTTTAAAGTTAAGT  
AAAATGCCTAGGACAAAAAGTTGTCAGTTTTGAATAGGGCTCGTAGACAACAAGCTAGAAATGAGCTAA  
ATAGGTCTAATTCTGAATATGCTGAGCATGAACGTATCAACAATATAGAGTCCCAACGAGGGCGTAGGGA  
AAATGAAGGTTTTAGCCAAACTGAGAGAAATAGGAATAGGCAAAGAAACCAAGTTCGCAGACAATACAT  
AGTTTACAGGGCAAACGAACAAAGACAAAATACTGTAGACCACTCGAGTCGACGAGCTAATTCTCCAGTT  
AGAGAACAGGAGCAATTGGCTAATACTTCGCGTCGATCGACACGCAGACAAGACCCAGTCTACCGGGCA  
AACGAACAAAGACAAAATACTGTAGACCACTCGACTCGACGAGCTAATTCTCCAGTTAGACAACAGGAG  
CAATTGGCTAATACTTCGCGTCGATCGACACGCAGACAAGACCCAGTCTACCGGGCAAACGAACAAAGAC  
AAAATACTGTAGACCACTCGACTCGACGAGCTAATTCTCCAGTTAGACAACAGGAGCAATTNGCTAATAC  
TTCGCGTCGATCGACACGCAGACAAGACCCAGTCTACCGGGCAAACGAACAAAGACAAAATACTGTAGA  
CCACTCGACTCGACGAGCTAATTCTCCAGTTAGAGAACAGGAGCAATTGGCTAATACTTCGCGTCGATCG  
ACACGCAGACAAGACCCAGTCTACCGGGCAAACGAACAAAGACAAAATACTGTAGACCACTCGACTCGA  
CGAGCTAATTCTCCAGTTAGACAACAGGAGCAATTGGCTAATACTTTGCGTCGATCGACACGCAGACAAG  
ACCCAGTCTACCGGGCAGACGAACAAGGACAAAATACTGTAGAACACTCGACTCGACGAGCTAATTCTCC  
AGTTAGACAACAGGAGCAATTGGCTAATACTTCGCGTCGATCGACACG

>Ref\_dvir\_953

CTGGAAACAACAGGAAACCAACGGGGTCTACCATTTCTTTGAATTTTACGATACAGCAAGCCTAGTCTCA  
ACTCATACATACTGGCAACATTCTCGTTTAAATTCATTGTTTTGTTTAGTTTAGAGATTAAAGATGTCATTT  
GAGATCTCGCTGCTGTTTCAGCTATAAGCCAGGTGTCCTTAATTCAGTTAAATCTACGCGCATTTTCAGGAG

CTTTGACAGCAAACCTGTAACCTTTTTTGTATTGGGTTTCTTGAGAAGAAGTCTACATGCGCCATGCGTTTTTC  
CCTTTCTATACACAATATCGAATTCAAAAGATTGCAAGTACAACCACCATCGATATACCTTGTCTATCTAAC  
TCAATCTTTTGTGACTTGCCTTTAAAGAGTTACAGTCAGTATATACTGTAAATTTGATACCTTTTAAATAA  
TGTTGATAAATTTTTACTGCGTTAAATACTGCCAAGGTTTCCAAAAGATATGAGTTATACCTGGACTCTGC  
TGGGGTTGTACATTTACTGTAATACTCGATGACATGGTTTCTATCATTTATTTTGTGCATGAGTATTGCACC  
ATAACCCACAGAGCTAGCATCTGTATGCAGCTCAACCGGATATTGTGGATCGAAAATGGTTAATACCGGG  
CTACGGGTCAGTGCAAAGATTATCTCCTTTCTCACTATTTTCATGACTTTCTTTCCAATCAAACTATTATT  
GCCTTTAGACGTAAGACAAAATAGAGGCTTTAAAGTTTCGGAGAATTTCGGCACGAATTGTCTAAAGTAT  
GATGCTAATCCAATGAACTGTCTTAGCTGCGTAACCGGTTTGCGGCGGTGGCCAATTCAACTAATGCCTGC  
AATTTTCGAGGATTAGGTCTAAGCTCACCTGCCTCTACTTCGTAACCCAAATACTCTATTTTGTATTTTAAA  
AATGTACATTTTTCGAAATTAATGAGAATCCAGCTTGAATAAGAATTTCTATGACTTTCTGCAATCTTGA  
AATTGCCTCATCTTTAGTTTTCGGCCACGACCAATACATCATCTATGTAAACCACAACATACGAATACGAAA  
GTGGCCCCAACGCTTTTATTATTGCCCCGCTGAAACACCGACCGGAGCATTTTTTAAACCAAACGGCATTGC  
CAAACTCAAATTGCCCTTCTGGCGTTACAAATGCTGTACGCTCTACTGAATCTGGGTGAATAGGTATTGT  
GTAAAATCCGCTGGCCATGTCCAAACAAGAAAAATACCTACCCCCACGTAACCTTGCAATTTGGTTCGGAG  
ATAAGAGGCAATGGAAATTTATCCGAAACTGTGTTAGCGTTAAGCTCCCTATAGTCGACGCATAAGCGAT  
CAGTTCCGTTTTTTCTTTCTTACCAATAAAATCGGACTCGCAAATGGGGAACAGCTCGGTCTTATAATATT  
GCCGCCATCAACTCATTAAATTTTTTCGCGAACAGTTTGCTTCTCATCTACACTAAGCCTATATGGTTCGCCTT  
TGTACCGTTTTATTTGGATCTATTAACCGAATTTCCAACGGCCTGTGTTAACCTGTTTCTTTGGACCCAGAG  
ATAAAATGTTCCATCTATGGTTTCAAACGTTTATTAACGGGTTAATACATTCTTCATATGTTTTGGGTTT  
AGTAACAACATTAATCAGCTTTACTTTATAAATGCAGAACCTGTCTGACTCAATGGTCACTCCGAAATCTT  
GGCTTAAATTTCCCTGCCTATCATAACATCGTGTTTCATATATTTGTCCATAAACGACATGAAATAACAT  
TTCCAAAATAAAATCATTAAATGGTTACATTGGTCAAATTTGCGTGGAGCTACATACAGAATCGTTTCCAA  
CACCTTGAGCATTACTACGTTAAAAAGTCTTTTTCCAGAGAATTTTCCAGCTGCGCTTTCTTAAATGAGTG  
AACACTCGGCTCCAGAGTCAAACAATAAATCAACGACTCACCAGAATGAACGAGCACACCTTTTTGTTC  
CATTACCGAACACATGTTCACTCTCTTTTCAGAGCTTTGTCCAGTCGAAGGGCACCCAGTGGAAATGTGTC  
CAGCCTGTCCACACTTGTAGCATATTACGTTGGATTTTTGCTCTTTTGGCCTCATACCAATGCGTCCAGCAT  
GCCCGCTTCCCAATGGTTGTGATTGCGGATTTTTCTTCTGGCGGCAGTCTGCGATTTTGTGCCCTGTCTTTC  
CACAATAATGGCAAACGATGTTTGAAAACCTTCTGCTTCTTCCTTTCAGGTCCCACAGTAGTTTCTGCTTTCG  
AAGTCTCTTGACGCTGCCCCGATTTTCATATACCTGCAATTGTTGCTGTAATTCGTTTCGCGATTTGATGTTTG  
GTGGTGCACACAAGCTTTTTTAGTCTGCTGTCCAGTTGCGCAGTATGCGCAAGCACAACCTGACACCAACA  
ATTTCTCTCCAGCTCCATATTTTTCATTTTCGTCAATTAACGAAGTGACGAGTCGGGCTTGACATACGACGAC  
ATGCACTCTCCAGTCCCTGGGCGTCCGTCTAGCAGCTTAAGAAATGTTGCTGTGGTTGTCTCTACGCCGAC  
AAATCTTTGCGTAAAAAGTTGCTTGAACCTCAACCCAAGTCATGCCAGGAAAACAGATTTGTGAAAGCCAT  
TGCGATGCACTGCCCTCCAAAGCTTTACTGAGGGCAATCACGAGCGCACAAACCTCAAGTGGATTTTCAA  
TAAAAATTATATCGGCCGTAATACTCCAAGCACATGCATCAGCACCGGTAGCTTCGGGGTTGTATTTGGGT  
AAAAACACCGTCTTTGACTCACGAGGCGCTGCGCTTCTATTTTGTGTGCTCCAAAATTTGACACAACCTGAGA  
GTTAGGAGGATCCAATTCCACTTATGTGCAAGCGGCCGTAGGGTCAGAATTTTTTACACTTTGAGCAGCGA  
GTCCCGGCATCTTTGTTGGTGGCATTGTCTTCTCTTTTCTAACTTCACAGTGCACAATCACGTCCGTTTCGC  
TCAGACCATTTACTTCTGTCTGTCCACATCAATCTAACGAAAGGTAACCGCTTTTGTCTTCTTGCAACGCGCT  
TCTTGCAACGCAACGAAAACCAGCCGTAACCGCTTTTACTTCTTGCAACGCTTTCTTCGTGTCTTACACG  
AATCAGCCGACAAAGAATAACGACACACCAACAACCTCTATGTACGGGCCACACTCAGCGAGAAAAAGA  
AAAAAATCGCTCTCTCTCTCTCTC

>9\_rnd-5\_family-11410\_\_LTR\_\_Gypsy

AAATGCCGAGTTTGGTCAAGATATCTTGANAANCAAAAATGNTTTTTCATACGAAAACCTTAATTTTTTCGAC  
CGATCGTTTCTATGGCAGCTATATGATATAGTGGTCCGATCTTAATAGGATTTTGCATATATATGAGGAGT  
AAAGTAAAAACTAATAAATGCCGAGTTTGGTCAAGATATCTTGAAAAACAAAATGTTTTTCATACAAAA  
ACTTAATTTTCGACCGATCGNTCCTATGGCAGCTATATGATATAGTGGTCCGATCTTAATAGGATTTTGCAT  
TATATATGAGGAGTAAAGTAAAACCTANTAAATGCCGAGTTTGGTCAAGATATCTTGATAAAACAAAATG  
TTTTTTTCATACAAAAAACTTAATTTTCGACCGATCGTTCCTATGGCAGCTATATGATATAGTGGTCCGATC  
TTAATAGGATNTTGCATATATATGAGGAGCATAGTAAAACTAATAAATGCCGAGTTTGGTCAAGATATC  
TTGATAAACAAAATGTTTTTCATACAAAACTTAATTTTCGACGACTCGCATATGATGTCCGATCTTAATA  
GGATTTTCGCATATATATGAGGATATAATGGTCCGATCTTAATAGGAGATTGCATATATATGAGGAGCATA  
GTAAAACTAATAAATGCCGAGTTTGGTCAAGATATCTTGATAAACAAAATGTTTTTCATACAAAACTT

AATTTTCGACCGATCGTTCCTATGGCAGCTATGTATATGATATAGTGGTCCGATCTTAATAGGATTTTGCA  
TATATTGTAGTATGTGCATATATTGAGGGTACACTGCACCAATAAAGTAACATCGTTTAAGCATAAATAA  
ATCAGCAACCCATTGTTGCAGTACACAAACAAAACCNTTTCGAGTGAGCGTGTAATATGATCGCCCACTT  
ATGAGCCACGCTGACCATTCTGATGCACATATATACATACATGCAAATATGTACATAAGACCCTCTCTCTCC  
CGATTATGCTGATAAGACAAAATATGTATGAAGCCGCTCCGCTGCTGGCGTAACCGGCAGCGCAGCTATG  
CGGTCTTAGCCATAAGAATATATTGAATAAAACATTGAAAAAGCTAAAGTCAAACGGCACAGACGTGCCC  
GAGTGTTTAACTATTTGGAATCGACTTTAATAACTATTACATGGCGACCGTGACTAAAAGGTCAAACAG  
ACCTGGACATGGAAGGACAGCAGCAACGGCAGTAACAAAAACACACAACAACAATAACAAAAACAAC  
AACAACTATGAAAAGTGTTACAAGTGATGACCAGCAGTCAACAAGTGTGAGAGGCAATCCGTCCCTTACG  
CCAGCGCGGGGAGACTTNGAGATTGAAAGAAAAAAACAAAGTCTGAGTGAGTAGAGTGCGAGTAATGGGCA  
AACGCGGAGGCCAGAAAAACAAAAATAAATAAAAAAGAATAGCACACATTAAGTGGCTATTATACACGAA  
TACGCCGCCACATGGGCAACGGCACAAAAATTAAGTGGCCGAACCTTGATTTTCTGAAAGAAAGCCTCCA  
GCAAAGAAAGCCAAATACCGCAACTCACTCAGCAAATATCAAAGTTATAAATGAAAAACTAATGAAAA  
ACCACCATCTCCAAAGCCGTTGCCGAAAAACCTGACGTCTGCCCGAACGACTGCCCTGGACCACTATACG  
CTCCAGCATGCAAATTCGCATGCTTGGGACCAAAGACCAGTGCGAAGACCGGCACCGGCCCGCCTGAGC  
CAATAGGCCACGGACATCAGNAGCAGTGAAGGCAACAGCGCGAGGGGCACTCCGCGACTTTTCGCCTACG  
AAGGAGCGTCAGCGTAGCCAAACCGGCGACGACCAGCTGACGCGGAGGACAACCTGGACATCTGGAGCAA  
CAGTTANCATTATTATAATAAAATTCGTAAAATTGTGCGGAACCATCTCCGCTCAATTAGAAGTATAGCCC  
GTAAAGCTATACAAACCAATAGGTAGAAAACTTGTTAACGTAAATGCAAAGCAATGCAATAGTAAATT  
TACTGAAGATACAAACAATAGTTATAAATACACTCTAAAAATATATACGCCCAAAATGGCAATAGTAGAC  
GTAAAGTCAGTGGACTCCACTGCTAATGTCAATTAATAAAGTAGAGTCAAATAAATGACTTAGAACTAA  
TACACACACTGTTAATAATAATTGTTGTTATTATGTGCGCAAATNGTTTTTATAAACTATATAAATTACAT  
AACAAATGTTTAAAAAAGAAATATATGAGCCAGGCAAATGACCTAGACAAANTTTAATTTAAACGAGAA  
AGAAGGGCTATCTTCGGCACGCCACAGATCTAATACCTTGCAGACCCAACCTTTCCATAATGCTCATAGT  
GCTTTGCCCTATCTAAGAAGTACCGGGAAAATAGTAAATGCCGAGTTTGGTCAAGATATCTTGATAATC  
AAAAATATTTTTTCATACGACTTAATTTTTTCGACCGATCGTTCCTATGGCAGCTATATGATAGAGTGGTCC  
GGTCTTAATAGGATTTTGCATATATATGAGGAGCATAGTAAACTAATAAATGCCGAGTTTGGTCAAGAT  
ATCTTGAAAAACAAAATGTTTTTCATACAAAACTTAATTTTTCGACCGATCGNTCCTATGGCAGCTATATG  
ATATAGTGGTCCGATCTTAATAGGATTTTGCATATATATGAGGAGCANAGTAAACTAATAAATGCCGAG  
TTTGGTCAAGATATCTTGANAAACAAAATGTTTTTTTCATACAAAACTTAATTTTCGACCGATCGTTCCT  
ATGGCAGCTATATGATATAGTGGTCCGATCTTAATAGGATTTTGCATATATATGAGGAGTANAGTAAAAA  
CTAATAAGTGCCGAGTTTGGTCAAGATATCTTGANAAACAAAATGTTTTTCATACAAAAAACTTAATTTT  
CGACCGATCGTTCCTATGGCAGCTATATGATATAGTGGTCCGATCTTAATAGGATTTTGCATATATATGAG  
GAGTAAAGTAAAACTAATAAATGCCGAGTTTGGTCAAGATATCTTGAAAAACAAAATGTTTTTCATAC  
AAAACTTAATTTTCGACCGATCGTTCCTATGGCAGCTATATGATATAGTGGTCCGATCTTAATAGGATTT  
TGCATATATATG

>9\_rnd-5\_family-1769\_\_LINE\_\_I-Jockey  
CGGTGGTAACCGCCCCGCCAATTATAAAGGCTGCGAGTGGTTCACCGAATATACAAAGCGTGCGGGAGCC  
CCAAAGCCCGCCAAAATGAAAAATCTCCCACCGACTCAAGCGAACCGAAGCCGCAGCAATAAAGTTCAT  
GGGCCTACACCTGTTGACTTCCCCCGTACAGCACCCACTGAACAAGTAGAAGGGCTTTCATACGCCGCTG  
CCACCAGAAGAGGACTAGCTGCATTGAGCAAAAGAGAACAACGTACCCAGCGCTAGCCAGCGAGAAGGAC  
CAGCGCAAGCTAGGCTACATAGATTGCTGAGGGAACAGCAACAGGAGAGGCTGACTGCGCAAGAACAGC  
AACAGCAGACATCTGGAAACGGGGAAGGACTTTCCTCTGCCATCAAGGACATGAGCCGAGCTATCGAGA  
GGATGGCAGTAATGCAACAGCAGGCTTTGGGTATGCAACAGCAAATCCTTAACCTTTTGACCGCGTTGCT  
ATCCAAATGAACACACCACTGAAGGTGTTAATCTGGAATGCCAATGGCATTTTCAGGTAAAGTACTAGAGC  
TGGAGGCTCTAGTACAAAAACACGCTATCGGAATAATTCTGCTGTGAGAACTAGAACCAACGGTCCCTAC  
TTTCCCCAGAATCTTTGGCTTCGAGGCGTACCCTGTACACTGGACTCAAATCGCTCAGCTAGTGGCGGCT  
GCGCTGTCTCGTCCGGAGTAACTTGGTTCACTTCCCGCAATTGAGCATTGCAAATCGTGTTTACCAATAT  
TCGACTGTGAAAGTCTCCACTGATGCTGGTAGCGTGGACTTTGGAGCAGTCTATTGCAGGCCAAATGAGC  
AGACGTCGACTGATGACTTCAACGTCATACTCAACTCGGCTGGAAGCAGATATCTNGTGGGAGGCGACTG  
GAATGCACATCACTGGCTGTGGGGCGCAAATAGCAGCAATGCGCGCGGCCTTCAACTAGCTAACAGCCTA  
GCGCATCGTCAAGCGAAGGTACTGGCCACAGGTTCTCCACAAGATACCCGTACGGCAGCAGAGGCACTC  
CGTCTTGATAGACTTCGCTATCTACCAGGGAATCCCTGACCAGCTCCTTTCAATCGCTGACGATTGGGAC  
CTCCCGAGCGACCACCTGGCACTGATAGTTACCCTGGAGAGCAGGGCCAGAGTGGTCAGCGCAATACCGA

GGCTGATCAACTCACGCACTGATCTCGGTGTCTTCCAGAGACAGATGAGTGATAGTATACACCTCAATAC  
CGAAATCGGCACTGGACTGGATGTAGAGGACGCCATTGAGCTGCTTAACGCAAAGATTTCGCGGCAGCAGC  
AGCCGAAGCCACCCCTCCCCCACCAGTTGCCAGGCGGCTGGATAGTGCTGGCAACGGACTGCCCGCAGA  
TATAGCCAACCTGCTCAGGATCAAGAGGCGGTGCAGACGCAGGTTCCAGACGACTCAGCATCCGTGGGAC  
AAGGCGGAGCGGCGAAAACCTCAAGGAGGCCCTTCGCAGACACAAAGACGCATCCTTCTCCAGAAGGTTG  
GAGAGCATGGACTATACCCATGACTCAGGATACTCGCTCTGGCGAGCAACTAAAAACCTGAAGCGCCAAC  
CCTGGAGAACCGTTCCCTTCTTCGCCACAATGGAACATACTGCCTTACAGACGAAGAGCAAGCTGATAC  
CTTCGCCAGCCACCTGGAGGAACGGTTCACACCTTCGATGAGACTACCCGAGCGTTGGAGACTCCGCTTC  
AGATGTCACCACCTATCGGCCCCATCCGCGTGGAGGAGGTGATCAACGTCGTCAAAGCCCTTCCAGGGC  
TAAAGCACCGGGCCATGATGGAATATGCCACACCACTCTTGAAGGCCCTGCCAATGCGCGCGCTCCTTTT  
ATAACGTTGATCTTCAACGCCATATTAAGGACGCAACACTTCCCTGCCAGTGGAAGTTAGCGAGGATCC  
ATATGATCCATAAGTCGGGCAAGCCGGAATATGACCCTGAGTCATATCGGCCGATCAGTCTCCTGCCTTCC  
TTGTGCAAGGTTTGGGAAAGACTGATTGTGCGCCCGACTTGCTAGGCTTATGGATCAAATGGCCATTCTTCC  
TGATCACCAATTTGGGTTTCAGGGGNGGGCATGGCGCTGTTGAACAGGTTTCACAGAGTGATTAACCATATT  
CTTAAGGCTTACGACGACAAAGACTATTGCTATGGAGTCTTTGTAGACGTAAAGCAGGCCTTCGACCGAG  
TCTGGATNGATGGATTGCTCCAGAAAATCAAGATGAGTCTCCCCGCCCTTCTTTCTACTTCTGCGCTCTT  
ATCTAATGGAGCGTAAGTTCGAAGTCAAAGTCAGGACAGCAATCTCTCCGTTTCGCTATATGAAGGCGGG  
TGTCCCTCAAGGCAGCGTACTGGGTCCCTTCTCTACAATTTGTACACGGCAGACATCCCCACTCCGGATG  
ACCTACATGAGTTCGCCACCCCAAGGCAAACACTTGATGGCCACATTTGCCGATGACGTGGCAATATTTTAC  
TCCGCCCACTGTGAGTACGAAGCCACTGATGGGGCCAGGAATACATCCACTTGCTTGAGAGCTGGGCTC  
GCAGGTGGAACATCAAGCTCAATGCCTCGAAGTGCCAGGCGGTCAACTACACACTGAGGCGTGGAAGG  
CTCCAGCAGTCTGGATAGATGGCAGCCCCCTTCACCNTGGCANAAGCGCCAAGTATCTTGGAATTGTACT  
GGATAAGAGGCTTACCTTTTCGGGCGCACATCGACGGCCTTCTCAAGCAGTGCCGCTTTAAGATGGCCAAG  
GCCAACTGGCTACTAAGCCCCAACAGCCCATTGCCACTTCGCTGCAAACGGGCAGTTTACAACGTCGTGG  
TGGCGCCAACCTTGAGATACGGTATCCAGGTTTGGGGAATTGCATCTCGGACAAATCGAAGACGGATTCA  
GACACTCCAAAACCTTTGCCTTGCGCCGAATGACCGGTGCTGACTGGTACGTCAGAAATTCTACCTTGCACA  
GAGACCTCAAAATGGAGACTATAGACAGCCAAGTCGAAGCATTTCGCCAACCGATACAACGAACGCTTGC  
AGCGACACTGTAACCGGGTAGCAAGAGACCTCGCTGGGAGGTGTGTAGTCAGGAGGCTCAAGAGAAGAT  
CCTTTAAGGACCT

>160\_rnd-1\_family-135\_\_LTR\_\_Pao

TGTTGGATTCTGCAGCAGCCTCATCAAATTAGCATAAAGCAAACATTTCATGTAAACATAAGAAGAGGTTGT  
AATTTTGGTCTAGTGGAACAGCTGTTTATTATAAACAAGGTTGGCAAGCCTTTCTTGCACTTGTCGCAGCT  
GCTATAAATTGCATATTCCTTTTTTGTCTGCTCTCTCAGTTCGTTGTTGATCGAGGCGAAGCGAAGAACCA  
ATTCTGAGCCACAGCCAAATAACCTTATAATCTACATAAAATTTGCCTAATAAACTGAATTATAACGTGTTG  
TTGTGAAAGGCCAAAATTTACTTATTTCTTGGTTTAGGTTCTAAACAGTTGCTAAAAAACATTAGTAACTC  
AACATTTGGAGGCCCCGGCGAGATTTAACATTGCAGTGCACACAAGCAAAATAAATCTATTGCAAATTAA  
AATTGTGATTATTCAAGTAGAACATAATCATCGTAAATTGTTATAATTAGGCAAGTGCAAACCGCCTGTGT  
GAGCTGACCATTTACAGCTCCCAAATATTCGCATATACATAAACGCCGCTAGTTGACTTTCGCGCTCTTCC  
CCTTGCGCGGTCAATTCGCCGGCTCAGCTTATATACATACGCTTGACATAAGCAGCTGCACAATTCGTGCG  
ATGTTGTGTGCTCAGTTTGGTGTCTGATTTTGTGCTTGTGAAAAAATGATGCAAGGCGAGAACACAGATG  
ATATGCAGTCAAACAGGGTGTCTTTTCTTAAGCGCAAAGCGGTTGCATTGTTTCGAGCGAGCCAAGTGTATT  
GAAAATGAATTATCTGAGGATAAAATTAACAACCTCTTGTGCCGTCGACTTAGAAGTGCGCCTTTTGCTAAT  
TGAACAACTAAGTCTGCCTTTAATACCGCGCATAGCTCGCTAGAGGAGCTTAATTTTCGATGAAATTGGC  
AGCAAACCTACGCGATGATTTTGACGAGTTGATCGCCATGGTTGAAGCTCGCGTTCGCGTNAATATTCAGC  
GTCGTCAATCTAACGGCCCCGCCCACTCAACCTTTCTTCGTCATGAGGATTTGCCAAACCAAACCTTGATC  
TTAGCCAAACAGAACGCGCCTGCCCGAGCTCAAATTACCAACATTTTCCGGTGGTTATACCGAATATTCGGA  
CTTTATCGCGATGTTTGAAGTCAAGTTGTGACAAAGGATACCGAGCTGTCTAACATTGAAAGGTTGCAGCATC  
TTCGCTCATGTTTGTCTGGCCCTGCGTTGGATTTCGGTTCGATCTTTGGAGTTTTCGGGTGCCAATTATCCTG  
TGGCTCTGGATATCCTAAATAGAAGATTTAGTAACAAACGTCTTGTTTTCCAGGCACACATCAATGAGATT  
CTTGGGCTCAAGAGGGTAGATTTCGGAGTCGGCTTCAAACTGCGTGAGTTCTCGGACAAGGTCAATTCGC  
ATATGCGTGCCTTACAGAATTTGGGCAGTTTGGAGCAAATTTCCGGATGCATAATAGTCCACACGCTGCTT  
CAAAGGTTGGACACCCAGACTCAGACCAAATGGGAGGAGGCCGAGGCATTGACAAAATCCCGACAGCC  
GATGAGTTCTTCACATTTCTGGAAAGGCGTAGTCAAAGGCTGGAGAGCGTGCAACACATGCCATGTCATC  
CCATATAACCAATTATCAGGTGGGCAAATCCAACCATAACACTAACACAGCAAAAGAGTGCTTGTAGCT



AGTAAAATGCCTAGGACAAAAAGTTGTCAGTTTTGAATAGGGCTCGTAGACAACAAGCTAGAAATGAGCT  
AAATAGGTCTAATTCTGAATATGCTGAGCATGAACGTATCAACAATATAGAGTCCCAACGAGAGCGTAGG  
GAAAATGAAGGTTTTAGCCAACTGAGAGAAATAGGAATAGGCCAAAGAAACCAAGTTCGCAGACAATAC  
ATAGTTTACAGGGCAAACGAACAAAGACAAAATACTGTAGACCACTCGAGTCGACGAGCTAATTCTCCAG  
TTAGAGAACAGGAGCAATTGGCTAATACTTCGCGTCGATCGACACGCAGACAAGACCCAGTCTACCGGGC  
AAACGAACAAAGACAAAATACTGTAGACCACTCGACTCGACGAGCTAATTCTCCNGTTAGACAACAGGA  
ACAATTGGCTAATACTTCGCGTCGATCGACACGCAGACAAGACCCAGTCTACCGGGCAAACGAACAAAG  
ACAAAATACTGTAGACCACTCGACTCGACGAGCTAATTCTCCAGTTAGACAACAGGAGCAATTTCGCTAAT  
ACTTCGCGTCGATCGACACGCAGACAAGACCCAGTCTACCGGGCAAACGAACAAAGACAAAATACTGT  
GACCACTCGACTCGACGAGCTAATTCTCCAGTTAGAGAACAGGAGCAATTGGCTAATACTTCGCGTCGAT  
CGACACGCAGACAAGACCCAGTCTACCGGGCAAACGAACAAAGACAAAATACTGTAGACCACTCGACTC  
GACGAGCTAATTCTCCAGTTAGACAACAGGAGCAATTGGCTAATACTTTGCGTCGATCGANACGCAGACA  
AGACCCAGTCTACCGGGCAGACGAACAAGGACAA

>9\_rnd-6\_family-1543\_\_RC\_\_Helitron

TTTTTATACCCTGAACCCATTAAAAATGGGTACAAGGGTATATTGTATTTGTGCAAAATCCAAATGTATGT  
AACAGGCAGAAGGAAGCTTCACCGACCCCATAAAGTATATATATTCTTGATCAGCATCAATAGCCGAGTC  
GATCTAGCCATGTCCGTCCGTCCGTCCGTCCGTCCGTCCGTCCGTCCGTCCGTCCGTATGTATGAACGCAC  
GGATCTCAGAACCTATAAGAGCTAGAGACTTGAAATTTTAGATGTAGATGCTCCTAGCTCCCGCGCAGAT  
CGAGTTTGTTCGATAATCGATAACTTGCTCCGTTTCCAAGCAATCGATAAAAATCGATATCGATATCCT  
GTTTTTGGGCAATTTTGGTAAATAATAAGAGCTGGAGTCACCAAACATGATATGTTGCTTCTAGAATATTA  
TATATATGTCAAGTATCTTTCATTTTATACCTATCGCCACCCCCGCTACCACCNCAGAGCTATAAATCAAG  
TTAATAACCCAACCTTGATCGCCAACCAATATAAGCTAGAATTTAAATGCAATTGACTTTTTTCAGAATACA  
CAAATATTCTATGGTACAATAAGATATACTGTATAAAATTTTCATCAAGATCGGTTAAGATACATAGAAGTT  
ATTAAAGAAACCATGTGGTTATATGTATATGTACATATATATTGGCAGGCCACGAGTCAGCGGCAGCTGG  
CACAAATTTCTGTATACATGTGCACTAATACACACAAAAGAATTACAATTGCGATTGCATCGTATGCTCTA  
TGTACATATGTGGTCCTATTTTAGTTCAGTTTTTTTCAATTAGTAGCAACTTTCGGTATGGCTGCAAGGTAA  
AAAGCCACGGGAGAAGCAGTTCAATTGTTATATGTCTGGAATAAGCGGCGCAAGTTCAATTCCAATGGGG  
AAAAAGAATTTTTTGAATTTTATTATTTGTCTAATAATGTTAGTTTTATTCTTCACCCATTAAAAACGGA  
AATAAGTCAAGAGAATGCTTTTTTTGCTTAAAGCCCTAGTAAGCTTGGCAAGTGCGTAGTGCGAGCTATTT  
CAGGTAAGGTATGCATAAATATCCATGCATCTTAATCACTAAAATGTCAATTTACGCAAAATTTAATTTCC  
TCATTTCAGAAATCATATTCTTTATTAATCTTACAAAAGAATGTAATCATATGTATTTATATCTATTTTCAT  
ACATACATACGTTTTAGGCTTAGGCCTAACCAGTGCGTATACACATACGTATATACATTATAATAATTTAC  
ATATGTACATATGTGTGTTTGTACACATTATTTTCTTCCCGCAAGTAGTCGAAGACCACGAAGTGGAACCT  
TTCAACACTGTTACTATAAATCTGCGCGCGTAATTTGAGAATTTTATTTTCGTAAATATTTATTATAGTTACA  
TGATTTTAATAATTCATAAGACAGTCTTAAGGAGGTTGACTGATGCATTAATAAATATTATCATTAGATTA  
ATGTTATTATATATGTGATTATAATAATAAATAAAGTAGCGCGCGCATTTCGATATGTATACTAAATCGTG  
GCGTTAGGAGAGTGAATATTTCCCAACACTCTCTCTTCAAATGTGCTCAGAAGAAGCAGTAATCGATTTAG  
TCTGTAGCCTGCGATTGCCATCAAACCTACCACTAACCAAACAGCATATAGATGGAACGTGCCGTAGAAGC  
AAAATGGGCACAAAAGTGCTGTTTTTGGTTTTTGTGATTTGTGATTTTTGCGTTTCTTACTGATCTAACAACG  
ATTTTTATTTCGAATAAACTATATTCTATCGGTTCCGAGCGGTTGAAAATAAATAAATTGCAGTGTTTTGTG  
ACCATTTTAATAAAAAAGTGAATTATCGATGAATTACCGATAAAAATAGTTTTTCGGCCGTTACAACCTGGC  
GTGTATGTGCAAGTGTGTGATTGACACTTATTAGGAATCGTATTTGTGCGAATGCAATTCACACAGCTGGT  
GTTGTAAGGGAAGTTTTGGAGAACCATTTTAGCTGAAATCGCAAAAATCGCAAGTTTTAAATATAATTAT  
AATTTTAAAGTCTTTTTTAAAGACTATACAAATATTACCTACTTTTTATTATTCCAGACATATATATATATC  
TATATATACATATAATATATATAAATTATATAAATTAATTTTAATAAATTTTATTGCAAATAATTTATTGGA  
ATTAATTAATTTAAATTACGAATTTTACTATATTACATTTTTTATTTTTATTAAAGTTTTAAAGTTAAGTAAA  
ATGCCTAGGACAAAAAGTTGTCAGTTTTGAATAGGGCTCGTAGACAACAAGCTAGAAATGAGCTAAATAG  
GTCTAATTCTGAATATGCTGAGCATGAACGTATCAACAATATAGAGTCCCAACGAGAGCGTAGGGAAAAT  
GAAGGTTTTAGCCAACTGAGAGAAATAGGAATAGGCCAAAGAAACCAAGTTCGCAGACAATACATAGTT  
TACAGGGCAAACGAACAAAGACAAAATACTGTAGACCACTCGAGTCGACGAGCTAATTCTCCAGTTAGA  
GAACAGGAGCAATTGGCTAATACTTCGCGTCGATCGACACGCAGACAAGACCCAGTCTACCGGGCAAAC  
GAACAAAGACAAAATACTGTAGACCACTCGACTCGACGAGCTAATTCTCCNGTTAGACAACAGGAGCAAT  
TGGCTAATACTTCGCGTCGATCGACACGCAGACAAGACCCAGTCTACCGGGCAAACGAACAAAGACAAA  
ATACTGTGGACCACTCGACTCGACGAGCTAATTCTCCAGTTAGACAACAGGAGCAATTGGCTAATACTTC



GCGTCGATCGACACGCAGACAAGACCCAGTCTACCGGGCAAACGAACAAAGACAAAATACTGTAGACCA  
CTCGACTCGACGAGCTAATTCTCCAGTTAGAGAACAGGAGCAATTGGCTAATACTTCGCGTCGATCGACA  
CGCAGACAAGACCCAGTCTACCGGGCAAACGAACAAAGACAAAATACTGTAGACCACTCGACTCGACGA  
GCTAATTCTCCAGTTAGANAACAGGAGCAATTGGCTAATACTTCGCGTCGATCGANACGCAGACAAGACC  
CAGTCTACCGGGCAAACGAACAAGGACAA

>160\_rnd-5\_family-10722\_\_RC\_\_Helitron

TCAAACCTGTAGATACTGGGGATGGATTAGCTATATGGGGGCAACAGGCATGCCAACGCAAATAGATTTCTGA  
TGCATCCAGCACTCCCATTACTTTATGGATGAAATTTTCAGATGATTCTGGACCCCAATTCAGAAAATAGT  
TAAAAGTTTTTCAGGCATAGCGGAAATNAGCAAGTGACAGTTTCNAGTCGTACCTGCAGAAGGTATAACTA  
TTCACAAAAGTTAGGGAGCTACGTATAGCAAAGTGGTGGTTCACACTTGCTCTCGTATGCAGCGTGCTGC  
AATAAACGTAGCTTGTAGTAGAGCAACGACTGCTTCCGNGTTGTTTATNATAGNAGATTTTNTTCCTCCTA  
AGCNTCCNAAAAATGACGATAAGGTCCAAAANGAGATAGAGAAATTGCGGACTGGNAACTACTTCGAA  
CACATTATGATCACTTAGATAACAGTTCCGCCCTAGACATTTCCCTTTATCATAATACTGAANGCATTTACN  
GTCATATTAAAGATATTCGATCAGACAGGCTNATGCTTCAGTCGTCTGTTCTATGTTTCGTTGAGGCCTCA  
ACATACTCAAATGAAAATATTGAGATTCCAGGGTTTACCGTTGTTGTCCGTCTTGATTGCGAGGTAATACC  
TAATACACCGCGACCTAAGAGGGGAATCGTCATTTATATTAAGAATGCAATTTTAAACAATATATCTAATT  
GCTTAAGCGGTAGGAAAATATCTGGGTCAGTCGTTTTTTGAGTATGCCATNTTTCTAAANGTCTGTAGGTNT  
TTTAGTTANTAATAATAATTAGTCCCTCATATCCGCTTGGTTTGTTTAAAACAGAATTTGAGGATTTATTTT  
AGCAANATTTATTTCAAAGGGACAGTTGCATTATTTTAGGAGACTTTAATTTATGCTTGAGCAAATTTGAT  
AGATGTAGGGCCCTTTACGATGAATTGCTCAGGAAGGGATTAGGTGCCTATTAGATTTAAAAACGCCAC  
TACCAATTGTGACTCTCACATTGATTGGGCTTTTTCAAATAGTTCCAGTAACGAAGTTAGCGCTAGCACCG  
AGACAGTGTACAGTTACCACAGTGGCATCTCTTAAATGTTTCAGGATAAGGTAAATTAAGTTTCTATNTAT  
AGGTTTATATAATAAAAAATACGTTTAAATTTAACTAAGGAATTATTTGATGAATATAAATAAATAAATATA  
TTACCTACATTTATATTTAAAAGAAGTTTAGTGATCTTGTACTTGGGTTTCAGGGTATTTTCAAGTCGGGCA  
CCCCGGGCGACCATTTTAGTGTGCCCAGATAGAGGTTTATGCTTGTGCAGAGTATGCCTTGCTCTCGCTTA  
TTGCTCATTGCGCACTTGTGTGCATCTTTTTCTCTCTTCTTCCCACAAAACCCCGAGATCTACAAACATTCA  
TATGTTTATCACGGCGTTGGTCTTCAAACATTCATATGTTGGTGTGTTGTGTGGATGTGCGCACAAGTAGATC  
ACGGCGATTGTGCGGAGACAAAGGTTTTCTTCAATTGTGGGCCTTTTGTGATTGTGGTAGCAAAGGGCAT  
TCAAATTCAAATGCTTTATCATGTATTTTTTCGCGCAGTCAGGCATAATGATAAGAATCTGATATATTTT  
TTCAATAAAAACTTACATGACCATAATGAAATAGTTGTAGTTGTATGAAATTATTTAAGGGCTTGACCTGT  
TCATGTGCAAAATGCTATTTTTTACCTACTTTTTCGTGTTGTGCAAGTTGGTTGAATACCTGCCCGATTGTG  
CACCAGCAAGTGCACAGCTTTTTTGTGTCACCAGCAAGTCGCAAAAATTGAACATTGTCAATTTTTTGGTCT  
TTTCGCAAAACACTTCGACAAGCCGACGATGAATTGCCCTTGCAGAAATGCGACTTAGTTTTTTTTTATTT  
AAAGCAAAAAGTAAGCATACCAAGTAAGAGGTACTAGTAGAGAGCTCCCGACTAGGGAACCCCTCTTATTC  
CAATAATAACATAAAAAATAAAGATAAAATAAGAAAAAAAAGTTCTCCTGACAGGGTGTGAGCTCGCAGC  
TAACCGCATTACTTGCTGACGTATCTACTCAACAGTCACACCAGCCAAAACAAAAAACAAGTTAGAGGT  
TCCAATCAGGAGCTCCCGACTAGGGAATACCCTGAACCCTCTTATCCCAACACCAAATTCAGCTCGTGCTA  
TGTGCTCTTTTGCTTAAGTTGTAACAAAGATAAATAAAACAAAATAAAATTCCTTGCCAGGGTTCGAAAT  
CCCAACTAACTGCTCTACTTTCCGCCGTCACTACTCAACAGCCACACCAGCCACAAAAATAAAATTTCTTC  
GGTAGGTCTCGAACTCGCGACGGATAACACCACTTGCCACAACACAATCGCAATTATAATGCTGTTGATG  
AGTACGAAGCAGATGTGCATGAATGTGTGTATGCGAACAGTTATTCTTCGAATTTGCGCTGATGCCGCAA  
ACACGTGTTTCTTAACCGATCTTCATGAAAATTTTACAGTATATCTTATTGTACCATAAAATATTTGTGTAT  
TCCCAAAAAGTAAATTGCATAAGAATTGTGGCTTAAGTTGTTGGACAATATAAGTGGGCTTATTAACCTGA  
TAACTATTTCGAGAGTATGCTATCATTTTTTGGTGCCCCTAGCTCTTGTTATTAAGTGGATTAGATATCGTTT  
TCTATTGGTCGCTTGGAATCGGAGTAAGTTATCGATAACCGGAAACAACTCGATTTGCGCAGGCAGCTA  
CAGCTAAAATTTTATGTCTCTAGCTCCTAGGACGGACGGACAGACGGACATGGCTAGGTTCGACTCGGCTA  
TTGATGCTGATCAAGAATATATATACTTGTACATACTATACTGTTACATTCAATTTACATTTTTAACAGAT  
ACAATATAACCTTTTTATCCATTTTGAATGAGTTCAGGGTATATAAACAGTTTCCCCGGTAGGGCTTGAAT  
CGCGACAGACCGCAGCACTTGCTATATCTCTACTCAACAGCCACACCAATATAGACAGTTATATATCAGA  
CTTTCTTTCTTGTGAAGAGAAATGATATAAGATGCTTTCCGAAAAGATGGAAAGACAGAAGTTTCAAAGG  
AATAGATTAA

>9\_rnd-5\_family-540\_\_LINE\_\_R1

AAACACACACACACAGCCGTGTGGCAAGCGGCCACAGAACTACTACCACAGCTTGTCATTGCTTGTCG  
TACGAGGCGACTGAAATGATACGGGGATGTAATTGCTCGGAGAGGTCCCTCTAGTAGGCGAAAAGATTCT

GACTGCCATTAACCTGGCAATGGCCAGATCGATTCCGTTCTGGGCAATTAAGCAACTCGTGACCTCCG  
GCAGTGGCCAGGTATCCCCTGGGTAGGCGCTGCACACCCGTGACGCGCCTAGCTAATACGAGAAGGCGAC  
TAAGACTGAGACCAGTAACGTCTTAGGTTGCAAACCTCTGGACAACCCTACACGACAAGACGACCCCTGGG  
CTGACGGCTGACAGTATTCTAGCATCTCAGTAAGCGGAGTGAAATCTGGCCGAAATGACTGCTAGGTTAA  
TGCTGTTACCGCCCCCGTCCCGTTAAAACATGGCAAATCTCCTAGCACGCTCCTCGAATCGTCGCCATTTA  
GTTGGCAGTATAGGTTTCAAGATGTGATATTCCTGATTAACGCGGATCTGGCTCTGAACACCCGACCCCATGA  
AGGCGGGTGTCAACCCTCGCATGGCCTCACTGCTTGCAAAGACAACCATGAGATCTAAACGCGACTGTAC  
AACGACCAAGGACAACGGCTTAGGAGTTGGGACCCAATAAAATGAGTACCAATGAAACCCCAACAAACGA  
AGGAGAGCTGTGATGCTTTTGCAAAGAGCAGCAGAATGGCGAGATCACCCTAGGTGTTCCAACAGCCGC  
CCCGACAGAGACGAACTCAGGACGGGAGCCAACGACGGCAAACCAGAGCAGCTCAGCACTACGAGAACT  
CGGGCAGGAGATCTCAAAGCTGGTAGTCATGCTCGAAGATGGCAAGCGACGCTCCATCCACCAGCCAATG  
CGAGACTCGATAGAGAGCATCAGAGTGGCTCTACGAGCTGGCGGCAATCCAGCTGCACGACGAAGGAGC  
CAAGGAGATCATCAGGACGCACCAGTCGTCCCAAACATCGCCATTGTTTCAAGGACGACGATAGACGTCAAG  
CGAAGCAAGCCACAGCACGGACACCACAAACAAACGAATCCGAGGACCAGCCGGTAGCCAGGCTACC  
GTATCAACGGCGCAGGAGACACCGAGCCCCAAAGCGGATGGCGACAAGTGGAAGGAGGTCACATACAAG  
AAAAGGAAGGAGGTCACCAGGAAAACAGCAAGGGATTGCTCAAGGAAAAGGCGCGACCCGGATGCTATA  
GTCATCTCGGCAAAAAGGCGAAGCGAGCTACTCAGAGATACTGAGGAAAGTTAAAGCGGACGAAAAAACT  
GGGCGAGCTCGGAAAAGCGGTGACAAGGATAAGGAGGACACAAAAAGGAGACCTAACTTCTCCAGCTTA  
ACCACTCGGGAGAGAATAACCATAAGCATTTGGAAACCTGGTAGGGCGAAACGTAGGAAAATGCAGAGGTC  
CGGGACGCTGTCCACCGAGTGACCGTTGAGTGCAAGGACCTGGACGAGATCACGACCAGAGAGGATAT  
CTGTGAGGCGCTGAGGGGTCAAATCCAAATACTGGACATAGCCCCCTGAGAAATATCAGCCTCCGAAAGGC  
GTACGGCCAAACACAGACGGCGACGATAAGACTGCCAGCGGGAAGCGCGAAAAAGGCCCTTTCAGTAGG  
TTTCCTGAAAGTAGGCTGGGTAACTCGAGAATCCGCGAACGGATNAACATCACCAGATGTTTCAGATGC  
CTCGAGTTTGGACATCTAGCAAGACACTGTAAAAGTGATCTAGACAGATCGAATCTGTGCCGACGATGCG  
GAGGAAAGGACCATCTGGCTAAGGACTGCAAACAAGAGCCACAGTGCATGCTCTGTAAGGAAAGGAATG  
CCGACTGCAAACACATTGCCGGCAGCGGCAAGATGCCCCGTGTTTAGGAGCGCCCTGGCCAACAGAAAAT  
GAAGTGGACACAGCTGAACCTCAACCACTGCGAGGCTGCTCAGGCCCTGCTGACACAATCAATACGGGAG  
AGAAATACGGACGTCGCAATAATCTGCGAGCCATACAAGCCTATCGCTGGAAGTGGCTGGGTGGCAAGTA  
AATGTGGAAGGCGGCCATTTGGTCTCTCAAATCACCGGTCCAGGAGGTCAGAGCAGCAAACGACGGATT  
CGTGAGAGCAAAAATTAACGGAATCACCGTTTACAGTTGCTACGCACCCCCAAGCTGGGAACTGCGGCAA  
TTTCAGACCATGCTGGAAGAAATATCAGAAGACGCTCGCAATAGAGCTCCTCTCGTCATAGCCGGAGACT  
TTAACGCCTGGGCGGTGGAATGGGGAAGCAAGGAACTAACGCGAGAGGGACCACCCTGCTAGAAGAGT  
TCGCGGCGCTCGACTTGGGCCTTGCAAACGACGGGCAGGAGCTCACGTACTGCAAGGCCGGTAGAGGCTC  
TATTATAGACCTTACCCTGCTCAGCAGCTCACTTTATAGGCTAACTACATGGAAAGTCAGTAATGAATTCA  
CATTACGCGACCAACCGAGCAGTGCATTTTCGAGATCCACGGGAGAGGACGGAGAAAACAGCAGCCCCAAA  
CAACAGGCCCCCAAATGGAAGGACAACAGCCTAGACGAGGAAACCTACACGGACTCCTTACGTCATGCTC  
AATGGACTTGGGCCACGGAGTTAGCAGACGACATGGCGCGGCAGCTCATGGGAAACATCTCGGACGCGT  
GCGACTTATCCATGCCAGGAGGATGCCAAACAGAAGAGGAGCACCTTGCTACTGGTGGAATGAGCAAA  
TCAGCGACCTAAGGAAGGCCTGCCTGCGTGCTAGAAGGCGCTCTCAGCGTGCCCGAGGCCACCCAGACTT  
TGCATCTAGGCTGGAACNCCTGCGGGCAGCCAAGCGAGACCTCAAGAGAAGCATTAACGAAGCAAATC  
CAGCTGCTTCCAGAAAATATGCGATGAGGCCGATGTTAACCCCGTGGGGCACGGCATAACGAGGTCGTCACG  
AAGAAGATCCGCAGGNAACAACCCAGGTGACCTGCCTACCGCACTTGCCACTATAGTTGAGACACTGTTT  
CCCCAACACCCACGACTGGAAGTAGCCAACCGCTCACTGAGCACGGAGCTA

>9\_rnd-5\_family-303\_\_Unknown

TAGGGACGAGCGNTATTTACTCAACCTGTTACAGTACAGTATTTAAAAGTAACTAGTTACTGCTGTTACAC  
CTTTCAAAAGTAACAGCGACAAAAATCATCCAATGACATGCACGGATAGTAAAGCAAGGGTCTACATTTT  
GGTCGTTGTTTACTCAAAAGATTGACACCGAAAAATTTACAAGAGATTACTACGACGATATAACAAATGA  
CTGGATCAATGCTGATGGCTTAATTTGTATTCACTTTACACGAAGATATACTTTTTAATGTTTATTTTTATT  
TTTACTTTGTACAGGCCTGTACTCAGGCTGTTTCTTTTCGTACTGGCTACAAAGCTAAGAAGCTATGAAAAT  
GATGTGTACCTGGCTGTTTATTTTGNACTTTGTACAGGCCTGTACTCAGGCTGTTTCTTTTCGTACTGGCTA  
CAAAGCTAAGAAGCTATGAAAATGATGTGTACCTGGCTGTTATTTTGAAGTTGCAACTGCACAGCCTCACTT  
ACAAAAATCGTTTAAATTTGTGCGAACGTTTTTACCTTATCTTAAATGGATAAAAAAACGAATGAAATTT  
GGTCCTTATTTAGGGCTGACGACGACAAATTTGCAAAATGCATTATTTTCAAAGAAAAGTAATCCTATAGT  
TTCCTACAAATTTAATAAAATAAAAAAAATTGTTATACAGCCTAACAATATTAATTTTAATTGGTTTCC

TTATATATATTA AAAAATTGCTGCGCGCCCAAGGTCAAGTAAAAGTCGCTGTTATATGTA ACTGTACACAGTT  
GTC ACTGTGACACAAATATAACATTATCGATCATCTCTAGATTGANACAGCTGATTAGTGATGAGCTTATT  
TGATGTAGTGTTTTGTAATTGTCCGCAAGGTGTACACGCGAAGCCGACAGGTAAGAAAAATCTATGAGTA  
GGATACATTTTTTCATTGATAAGTTTATTGCATAGTTTGTA AACCTTAAATAAAAACAGCTTCAAAGGCACGT  
TTTTTTAGCTAAATTTAGTAACACTGTCTAAAAGCCTTTGTCCACTGTCCA ACTTTAGCAAAAATGTGTGAA  
ACGCGCCCTGTGTGTTTCCCCATAAGATAACACATTTCACTCATCTTTCAAAAACAGGCAAATAATGTGTAA  
ATTCACCCCGAACATTTTCGTGAATTTAGCGATGACTAATCGAGATTTCTATCGATGCTGTGAAAAATGGTA  
AAGTATCGTTAACATAAACAGCTGATATATCAA ACTTTAAAATGTGCGTTAAATTAGCGGTGGTGACTTTA  
GGCTTTAGGCACTAATTTTAACTAAATGGACGGTACAGATTTTGAGAAAAATTA ACTAATTGTAAACCAAC  
CTCATATAGTTCATTCATAAAAATCTATCGAACTGCTAGTTCGTACGAGAACTGAATCACTGCCTGGAATTA  
GTGCTGAACAATTTTGTACAGAATTGGGCGGGAACCAATTCAATTTGAATTATATATAATCATGAACAAC  
GGAAAGGACTCATAGTTAATTAAATTAATAAGTCAAAGCAAAAAATGAGAAACATTAAGTCATACTTAAT  
AGCGCAGTTTATGGAAAAATTGCATTTTTCCATTTTTTTTCATTACATCCTATGTTATTGCAAAAAACATGCT  
GGCAATATTAGATATCATACTGT TAAATGGCAGCCATATTTTAAACTTTATTGTTTCATTTCTCCGAAAAC  
GGCCCCAAATGCACGGTAGTTGTGCATATATAGAGCACGATTTATCAATTATTTTGCTATTTATTTTATT  
AAATCATCGGTACAGATATTGAGAAATTCTCAATTTTCTATTTCTCTCATAACATCCCATGTTAATGCAAA  
AAAACATACAGGCAATATTAGATATCATACTGT TAAATGGCAGCCATATTTTAAACTTTGTTATTTAATTT  
CTCCGAAAACGGCCCCAAATGTACGATGGTTGTGCATATATAGAGCACGATTTATCAATCATTTTGCTATT  
TATTTTATTAAAACCATCGGTACAGATTTTGAGAAATTCTCATATTTCTATTTCTCTCATAACATCCTATGT  
TAATGCAAAAAATACATATGTATATATTGCGCTGTTTTCTTGAATACATAAAAGTACCGTTATAATAGACCC  
TGCCAACCCATTATAAGCCTAGCATATAAAAGTGTCAATCTCTGAAAATAAGTGAATAATTA AAAATATCG  
GTC ACTCTTTCTATACATGGAGATGAATAGTTTGTAAATTGTGCTCACAATAAAAATGTAAATATTGTATCT  
ATATTTATATATACACAGATAATAATACAAATTGAAGAATGTTTTAACGACTATACTAACTATTTATTTTA  
TATAAATAACATTTTTTAGATAATATTCATCGTCATGTGTACTTTTACTTATTTTCACAAGGTGGCATCTTTA  
TGTTCCCATAGGTTAGCTTTCTTCATAAGTTGGCATCCCCTAACATAGCGGCACTTTTGCA TTCCATGCTTA  
TATCAAATAAGTTTTTTAATTTGTAGTTCTGTACATCACACA ACTGCTCAATTGGGCCATATATGTACATCA  
TGCACAGCAACCGCCTGTCGCCACTGGTCTACGATCGGGAAACGAATACAACGGTTGTCGATGATGTGAC  
CACGGCTGCCGCCGATGATAAACAGCACTCGTAGAAGAGTGCCGATCCGCTTAGTGCGCTGCTAATAGCC  
TGTGGGCTTAGTTTATTGATTAGCTTAATACACTCGCAGATTGTTGCAACAAATACGTCGCCGAGCGACAG  
CAACAAGAACAAATTGCGTCTCATTTCCATGTGCGCTTTTGCGGAGAAACCGAATAGGCCTAGAGAGCAT  
CGATTGCGGCGACGCAAAAGTTTGTACAGGGCGTTACCAAACCATAATTGCACCCTAACTAATTAGTATTT  
TATTTACAGCCCAGCAGCAATCATTTATTGAGCGCACGACGTAGCAAACCGACTCAGATTTAATGCCCTA  
CAAGGCTACGAGTGCATCGATTGCTGGGCATGACCAAGGATTACATTTACATAGGCCTCGTCTGTACAT  
ATATATATATATATATATATATAT

>9\_rnd-4\_family-1027\_\_LINE\_\_Penelope  
ACTTCGCAACTGATAAGAGCAGCATCTTAATTTTATCTTATAATACTCGCTCTGCAAAGCAAGGGCCTAAA  
TTTCGCTCTTAAGAATTCATTTACATAGAGCTGCCGCTCTTCGCTGTAACGATCGTTTTATTGCCCTAGCTT  
TACTTATGCGAAGGCCTCGATGCTGCGCATCGNGTTAGATTAAAGTTCGTTTCGCTTCATGCATTTGGTACGC  
ATCGGCCACTTGCATTACTCAAAATTATACTAATAAATTGTCTCTTCGCTAAAATTGGCAGCTTCTTATTCG  
GGTTTCGCTTGCCATATACAAACTATTGTTCTTAAATAATAAGCACAGACCAATTCCGGGTCTGCCTGCTTC  
TCGTA ACTTTAAGAAATATAAAACAATTTTGAACACAAAAAATAAATAGTTCAATCTTTCTATTTGTGAAA  
GCTATTGAAAAAGCTCAATAGCGCAACA ACTACAATACATAGAAGTAATGTAATTTACAAAATACATTGT  
TGCGGGGTCACCAACAATAATTTCAATAGAGTGTA AACTAAAAACAATGACAATGCGACACAAATCGGA  
CTTCAGATTAAAGAATTCTCGAATTCGCGACAGACCGCACCACTCTACTCAACAGTCACACCAATAATTGT  
GTCTTATTGAATTA AAAATATCAGCACAAAGAAACAATCGCAATCGCAATGCTGTTGACAGATTTGCGCAGCA  
GATGCGCATGAATGTGTGTGTGTGTACATGTATACAGAAATCTTGGAATTTGACCCCATCCA ACTGCGCA  
GTAAGACACATAACTTATGGGATTTTCTTAACCAATCTAAATAAAAATGTTCTACAGTACATCTTATTGAAC  
CATCAGAACATCTTATTGAACTCAAAAAGAAAATTGCATTTAAAATGTGGCTCAAATTCATGGGCAATAT  
AAGTGTGGTTATTAACTTGATTTATAGCTCTGCGGTGGTAGCGGAAAGGTGGCAATAGGTATTAACTGAG  
AGGACCTTGATATATATATATATATATATATATATATATATATATATATATATATATATATATATATAT  
TCAATTATTTTACTCTAGCTCTTATTATTTACCAA AATTGGTAAAAAAAAGGATTTTGATGTCGATTCTT  
ATCGATTACTTGGAACCGGACCAAGTTATCGAATATCGGAAAATCTGTCTCTAACTGCTATAGTTTCTGAT  
ATCCTCGCGTTCATACGTTCCGGATAGACGGATGGACGGTTAGACAGACAGACGGACGGACATGGCTGGAT  
TGATTGCGCTGTTGATGCTGATCAAGAATATGTATGTACTTTATGGGATCGGTGCTTCTNCCTTCTGCCTGT

TTCATATATTTACATAAATACATTATACTTGTTTTACGCATTTTAAATGGGTTTCAGGGTATAAAAANTAGCAC  
CAATGACCGACTGTATGACAAGGAAACAACAATAATCCTGCACAACACTTCAACATACAGCATACANTAA  
AATAGCTACACAACAACTAAAGAGTAAACTTAAACAAATACACATAAAATTGCGCTCGCTTGTGTTGAG  
ACTTATTAATAAGCCAAAGAATTTCAATCTCCAAGTCAAGAAGCGCAGACGTATGTTAAATGTTTAAATTTA  
TTGCTTAAATTAATTTATTTTAAATGTTATTTGTTTATTGTTTCTTGGTGTAGTGCCCTGAAGACGGTTGCCG  
ATAAGCAATCGAATAAAGCCAATTTTTTTTAACTTTTGTTTTCAATAAACTAAACCCTGGCCCTCGAGCTA  
GCAAATCAAAATACAAAAAAAATTAAATTTAAATTGTTTATTAAAAAAATTATTTAATGACTGATAATTTT  
CCCTAGCACTATATTTTACACGATTTGGGTTCGAGCAAGAGAAATGTTAGCACGCGAAAAGTAAACGAACA  
GTTTCGAAAGTAGCACCACGCTTAGACATAGCAGCGAGTAAACGGTTTATTGCTGCAGAAATGCACACACC  
ATTTGTAGATATGGAAGGCGTCATGGTTACCGAAGCTCAATATATGCGTAGCCTGACGGAGGCAAGCGGC  
TCCAATCTCCAATAATCTTGGAACATGAAAATCGTTAAATAAAAAATATGTTTAAAGTAACACAAAGGTTA  
ACCCCGTAAATAACAGTGTTGACTCTTAAATGGTCTTACAAACAATATACAAATATATTGCTGTATATAC  
TATATATTACGCAGGAATATGTTGCTAGATTAATATAATTGCGGATAGGTTGCAATTGGATTTAGAATAAA  
GAACGCGGAATGAAATGTTTTCTGTTTGAATTGTTTGCATTATGTTCGGGCATGGACTTTACCACCGCATAC  
AAAGCANCGAACCTGCTTTCGAAATTTTAAATAATAAGTAAATTAATCTATACCTACACTTATTATATTG  
ATAAAAGGGAGTCAATACGGTCTATTGTACCTAGTGCTCGCTAATGAACAAGAGTTGTTTCGACTTTCCCTA  
TGAAGAGGAGCCGTGCCTTTCTAAAAAGTTTTTATTTCACCTTTCCCAACTTTCACTGAGAAAATACATAA  
GTGTTTTTGTGAAGAAGAACGTACAATAAGATATTTAAGAGGTGTATTCTGTGAAGGTGATATTTTCGCTGT  
GTGGTGCCCTACCAGGTAGGCGAACAACAGTTTAAAGCCATCTCTTCTCTTCGCAATTGCTGTAGTTGTTGC  
CATTTTCCGAGGTCTGCAGACGAATTTACGAGATCCNTTTTATATATTAGCAAATATGGATGCAGAACAG  
GCTTAATGTGGCAATCTTTTTCACGTGTAAACACAATAGAGTGAGCCCAATTTTATGGCAGTGGCTCGTAA  
CCAACCAGGAGCGGCCTGAGTTGCCCTGGTTAGGCAAGTCCAGACAACATGTGTAGATTTAGTTAACGT  
ATTGTCTCGATAGTGGGTCTGTTATCCAGAACTACTATAAAGATTTGACCAATATCATCTAGGTACTATTC  
AGAAAAGAGCACAAATATTT  
>9\_rnd-1\_family-103\_\_Unknown  
CGATCGGTCTGAATACTTAGTTGTTGTATGAAAAAACATTTTGTTTTCAAGATATCATGACCAAAGTCGGA  
ATTCATTACTTGTACTACTTCTCATATATATGCAAGATCCTATTTCAGATTAGACCACTATATCATATAGATG  
CCATAGGAACGATCGGTCTGTAAATTATATTTTGTGTATGAAAAAACATTTGGTTTTCAAGATACCTTGACC  
AAACTCGGCATTTATTAGTTTTACTATACTCCTCATATATAGGCCAAAATCATATTTAGATCGGAACACTAT  
ATCCTAAAGCCGCCAAAGGAACGATCTGTGCAAAACTAAGTTGTATGAAAAAACATTTTGTTTTTCAAGA  
TATCTTAACACTTTACATTTATTAGTTGTACTTTACTCTTATATATAGGCCAAAATCTTATTAAGATCGGTCC  
ACTATATCATAAAGCTGCCATAGGAACCATCGGTTCGAAAACAAAGTTGTTGTATGCGAAAACATTTTGT  
TTCAAGATATCTTGACCAATTCGACATTTATTAGTTTTACTATACTCCTCATATATAGGCCAAAATCATATNA  
AGATCGGANCACTATATCATAAAGCTGCCATAGGAACGATCGGTTCGAAAACTAAGTTGTTGTATGAAANA  
ACATTTTTTTTTTCAAGATATCTTGACCAAACCTCGGCATTTATTAGTTTTACTAAACTCCTCATATATAGGC  
AAAATCGTATTAATATGGGACCACTATATCACATAGCTGCCATAGGAACGATCGGTTCGAAAACTAAGTTG  
TTGTANGAAAAAACTTTTTGTTTTTCAAGATATCNCGACCAAACCTCGGCATTTATTAGTTTTACTATACTCC  
TCATATATATGCAAAATCATATTAGCATCGGACCACTATATCATATAGCTGCCATAGGAACGATCGGTCTG  
AAATTAAGTTCTTATAGGAAAAAACATTTTGTTTTTCAAGATATCTTGACCAAACCTCGGCATTTATTAGTTT  
TACTAAACTCCTCATATATAGGTCAAATCATATTAATATGGAACCATTAATCATATAGCAGTTATAGGAA  
CGATCGGTTCGAAAACCTCAGTTGTTGTAGNGAAAAACATTTTGTTTTTCAAGATATCTTGACCAATGTGCAC  
ATTTATTACTTTTACTATACTTCTCATATATATGCAAGATCCTATTAAGATCGGACCACTATATCATATAGC  
TGCCATAGGAACGATCGGTTCGAAAATTAAGTTTGTGTATGAAAAACCATTTGGTTTTTCAAGATATCTT  
NACCAAACCTCGGCATTTATTAGTTTTACTAGGCTCCCTTCATTTTCAAATTCCTATTTACATCGGACTACT  
ATATCATATATCTGCCATAGGAACGATGCGTTCGAAAACTAGGCTTTTGATTCAAAAACCTTGTTTGTATC  
AAGATATATTAACCAAACCTCGGCATTAACATTTACCCTGTGCTTGTTAGATACGGGCAAAGCACTATAAG  
CATTATGAAAAGGTTGGTTCTGCAATGGTATTAGATCTTCGGCGTGCCGAAGATAGCCTTTCTTTCTCGTTT  
TGTAACACTTGATTTTCTGTTTATCGCAACTTTTTATACTCTGTTCTCACAAGAAGTATATCTGGCAGTCGC  
TACCCAACCGCCANCGTTATCTCGTAATCACAACAAGAAAAAGTGATAGTCACTACACCTACTCTAAAAA  
CATTTTAACATATATTCGGAAAAAGAAGACAGACGAAAATATAACCGAATGGTGAACAAACGAGTNTTTC  
TTCGGCTTCGGAAAAAATCAATTTTTCAGAGCAGAAACGCTCCCCCAATTGCCNGCGATTCAACCAGCATT  
CGCTCCGCTTGATATAATACTTAAGAAAATAATTACTATTCGATTTGTATTTATGGAATTCAAAAAGAAT  
CACTGTGCATATTCACCAGCATGTACACACACACACACACACACATCACATTATATGTGTATCGT  
GTTTTATTTTCCCACAACAGTTTTTAAGAACACTTTTTATTAGTTCTTTGCGCAAATTAATTGGCAAGTGCA

AAAGTAAACAAACACCAGGTTGTAAAATATGAAGCTAAGTCTGANCCTAACTAAGTCTGAGCCTNACATA  
TTTATATTTTTTTCTATGTTTCCATCTTGCTATTGAGCTTACTACTTAACAAAATGCAAGTANATTTTCATA  
AATAATAATTGCCTTTTAAGGAAGTGTCCACTGAGCGGCTTTTTGCTTAATAAATCAAAACATACTTAAGT  
TTTTCTTATTTATAACAAATNATTTACAATTATATGTGAAAAACTACCAAGTGAGTTNCGTTTAGAACAAA  
TGTGTTTCTTTCTGAGTTCGACAGTTAATGAACCATAAGCATGCATTTTTATACCCTTGCAGAGGGTATTAT  
AATTTTGTTCGTGAAATGTGTAACGCATAGAAGGAGACATCTCCGACCCCATAAAGTATATATATTCTTGAT  
CAGCATCAACAGCCGAGTCGATAGAGCCATGTCCGTCTGTCCGTCTGTCTGTTTCTATGCGAACTAGTCTC  
TCAGTTTTAAAGCTATCTTAATGAAATTTTCGCAGAAGTCCCTCTTTCTGTTGCACGCAGCACATATGTGAA  
AACCAGCTGGATCGGACCACTATATCATATAGCTGCCATAGGAACGATCGGTGCGAAAATTAAGTTTTTGT  
ATGAAAAACACTTTTGTTTTTTCAAGATATCTTGACCAAACCTCGGCATTTATTAGTTTTACTTTACTCCTCAT  
ATATATGCAAAATCCTATTAAGATCGGACCACTATATCATATAGCTGCCATAGGATCGATCGGTGCGAAAA  
TTATGTTTTTGTNTGAAAAAAACATTTTGTTTTTTCAAGATATCCTGACCAAACNAGGCATTTCCCTTCCTAG  
CAACTTGGATGTATCTCCAATGTTGTCTTTATCGCCTTCTCTAAGCGACTGTCCAATTACCC  
>9\_rnd-1\_family-471\_\_LINE\_\_I-Jockey  
GTCAAGGGTNTGGCGATAAACACAGCTCAGCAGACTGCACTAAAAGTAAAGAGGAACCAGCGTGCTGTG  
TACACTGTGGAGGCGACCATGCTGCTTCACATAAAGGCTGCGCCATTTATAAAACGGCCAAGGCGCAGGC  
GTTCCCNAAATGCTTTTCGTACCCAAATGTCACGGCCAGGCGTACCTTAGGATCACCCATCTGCTAAAATC  
GACCCACAAGTCAGCTTCTCGGAAGCGCTTAGAGAAGGAAATAATAATTCACAAAGCCAAGCCCGCTAAT  
CTGAGCAGTCAGCAGCAGAAGCTACGGAAACCATGGTTACTCGATTGGAGTAGATGATGGAAAAATGAT  
GAAGAAATTATTTAGCCAGATGACGCAAGTGCTAGCCATTTTGTGGTAAGCCTATGCAAGTAAGGCTTA  
ACCTCACCATCTGGAATGCCTGTGCAATAGCAGGCCAGAGGTCGAAAACTTTGTGAAGACCACCAACACA  
GATATACTCCTAATATCAGAACTCACTTCTCCCAAAGATCGTAGTTCTCCATCAAAGGCTTTGATATTAT  
TTACAGCAACCACCCAAACGGTAGAGCCCGTGGTGGAGCTGCAGTGCTCATCAAACAAGGAATAAAATAT  
ATTGAACTGCCAGCATAACCACAAGATTGAGTGGAGTGCGGCCAGGTCAGGCTGCCAGCCCGCTCGGCGA  
CCTTTACAATCGCGGCTGCGTATCTCCACCCAGGTAGCCTTGTCCCCTGGTTTATAATTGGTGGCGATTTC  
AATGCCAAACACTCCTGGTAGGGCTCGCGTACCAACATCCCCAAGGCCAAGCTCTTTACCGTTGCATACA  
GAAAAGAAAGGACTTTGCTGCCACTCACCTGGTGAACCCACATACTGGCCCCACGGATCTGCGCAAGGTC  
CCTGACATACTGCTACATACATTGCTATCTCCAAAGGTATAGCTTCCAATAAAATAGAACGAGAACTTATT  
CTCCGACCACACCGCTGTAACATTACATGTCAATACCCGGTCGAGAAAAAAGCGTCGAGGTTCCCTCGAGG  
ATTTCAAACCAGGAGACCCATCAAATCGCTTTTGGCAGGTCACACGCCATATTAACGGCAGAGACCCAT  
CAAATCGCTTATGGCAGGTCACACGCCATATTAATGGCCTATTAGAAGGGCAGCTGTGGTTCGAAAAGC  
AAATGGGGACTGGTGGCGATCAGACCAAGANAGAGCAGATGCCTTTGCAGAGCCCCTTTAAGACTCATTC  
ATGCCGTTTGATCGCTGCTCATTGACGGACAAAGCGGACACTATCCTTTATTGGAGCTACCAAGTGTGGAG  
CTAATAATNGTATCCAGTTACTGACCAACGTAATTATTCGATGCCTTGAGATTGGACATTTGCATAAGCTT  
ACTGGCTACTCTCTCTAAATTGAACGAAAGAGTTTATTTACTCTATAGTGCCGCCAGTATTGAACGAGGCT  
AGTTTGATCCCAGACCATCAGTTCGGCTTCAGGCGCATCCACGGAACACCGCAACAGTGCCATAGGATAG  
TAGAGCGAATAATGCAGGCATTGGAAGAGAATAAGTACTGCTGTGCTGTCAAGCAAGCCTTTGATAGGGT  
ATGGCAGCCCGGTCTACTNCATAATGCNTAAAGTCAGAGATTCTCTAGCTNCAGTCGGCTGGTGAGGACG  
ACGGCTTGGGTTTTAAGGTTACACGCGTTGGAGCCGTGGACAGAGGACTGAGCTTGAAAGATTGCGCTTCA  
CCGCTACGGAGTGTGAGAATGCTGAGAACTTGCTGGTACGGCGAGCGCAATGCGAAGCGTTGCCTGACGA  
GGTTCGAGCCTCATACAATGAAGAATCAGTCGGTCATCGAAGAGACATAAGAGGGGCTGGCGCCTTGCAGT  
GTATACCAATGCGCGTATGCGCCCNACAGTGTAGGCCAATAATCCTGTACACCGGCTCGCACTGACGAA  
ACCGATTGNGTATCACTACCATATAAAAATGAAGCATCAATACATGGATGCAACGATAGGCGACATCAGG  
ACCAGATTTTGGATAACAAAGCTGCGTCGACTGTTGCGTACAGTAATATTCATAGTATATAGAGCGGAGC  
CAGGGGCACCTATAATGGGTCATCTGCCAGAGGACCGACTGGAGGCCATTTGGACTATTTTGGACCACTC  
CTTGTGACAATCGGACGTGCGAAAAGAAAGAGATGGGTGCGCTTGCTTACATGCCTGACAACAAGGGCCAT  
ACATTTGCACATAATCTGTCAACTAATTCCTGCATAATCGCGATCGGGAATTTTCTTTGCCGTGCGGGACC  
TGTACTGAGGTTGCGCAGTGACAACGGAAATNACTTTGTTGGAGCCGACAGAGAAGCCAAAAGGCTCATA  
GACGTATTCGAGNCGGAGAAGATTCANGGTGAGCTATCTAAAGGCATTGATTGGATCTCCAATTGCCAG  
CGAACCAGCTGAAGGGGGCGCTTGGGAAANGATGGTGCANTGTGTCAAGAGAGTGCTACGCCACACAN  
TAAGGGAGGTGGCACGAAAGCAACACGTAAGTGGAGAGTTTCTGATTAAGGCCGAGAGCGTTGTGGATT  
TCGCCCCGCTTACCCACTTACCGAACCAGGAAAACCCCTAACACCGAACGATCTACTCAAAGAAGTGGCC  
AATCTGCCTGACACACCCACTTACAGCCGAACGAGAGACGGGCCACGAGGAAACAGTGGGACACGGCGC  
GTCTGTTACGAGACCGTTTTTGGGAAGCGGTGGGTCTTAGAGTACCTGCCTGCGCGCGTTGAACCGATACGC

CATGGTGATATGGTGTATATATGCGACCCGGCCGTGCCGCGCAGAGAGTGGCGAAGGGGCATAGTGGAGG  
AGCTCTACCCTGGACCACGCACCAGCGTGCGCGTGGCGGACAACAATCGAGTACGACTGATCACTCGTCC  
TGTGGCTAAACTAGCCA  
>9\_rnd-1\_family-294\_\_LINE\_\_R1  
CTAGAACCTCTTANTTGTTTTTATATCAAGTCAGTTTCTATATAGGCTACATGGTTTAGATATATTTAATT  
TTTCGAATACCTCGGTACAAATTTTCAACAGTTGTTATAAAAGTAAGGATATGCATTACATAAGGTGAAGT  
GGGCAGACACTTCCACAATTTTGTGCATAAAATATATTTCATGAAAACTCTTAAGGCTTTTAATATAAAATA  
TTCTTTACTTTACTTCTTTGCAAATATTATTTACACAACATCTGAATAACCATTTTTAATTACTTATTTTTAT  
CGCACAGTAGACTTTACTTTTTAAATACTAAAATCTTATAATTTATGGAGTCAACTGTTTCAGACATCACA  
TACTATCCAGATAAATCATCGTCATTTATAAATTGTACATATTTTTCTCGCAAACCAATGGCACCGTTAGA  
TGATGTTAGAAAAATTACTGTGCCAATTACTAAAAGTCAGAAACAATGTAGACGGCACTTTTACATATTTT  
GTAAACATTGCAAACAAAATTTGCACGCCACATAGAGCTTAAATATAGAATGGAACCAGTTAGAGAGAT  
CAGCAGTTTATCAAAAGACAAACAGCAAAGAATGAAATTGCTTGAGGGATTACGGAAAGACAAGGATGC  
TGCTTACAATGAAGGAACCTTTTATAGTTTCANGTCNATTAAGGGAAAACCTCAAAAAGAGGGGCTTTGGATT  
TTGTGTGCTGCAATGGATGTAAAGCCTATTTACCGAAGACAACAACCTCGGAATCATATTAANAATTAATG  
TAGTAATATCCATAAAATAGGCAACCGAGATATATTAACCTCTGCACGAAGTGCTGCAAATAATATTGCG  
AAATAAAATAATGCCTGTCCTTAATGACGTCGCCATTACTAGGACAATATTGTATGATCACCTAATTATAT  
TGTTTAAAAATTTAGAAGCAATGAAGCACACGGAAGTACAGCATGATATGATAACAGCAATTATGCGTTA  
TCTAAGTCGCCTTTTGATAGTAATAAAATATGTTATTTCCCCTAAATATTATGATTCTGTAAAGTCTGGAAT  
TCGTTATGTTGCTGAGTTTGATTATGATAATATTCGTTTTATGAAGCCTACTGCAGCGACAACCTCTAACAT  
GCTTGGTAAAAATAGTGCATGTGCGAGAATATTAAGCACAGATCATAAAATATTGCGACAATAGCATA  
AAATATTTAGAAAAAGAAAAGATTTTGTTCAGGATCTACCTGCTAAAGCTTTGAATGAGCTAAACTAGAA  
ATTCAACATATCACCANTAACCTCGTTATATCAGAGCAGAGTTAGCGAACTTGAGAGTCTTACTCTTAAGA  
GCTACAGAACTGCTCATGCAATTGGGGCTATCGACGATAGAGCTAATTCTGACCTGTATGAAGGCACCTC  
AGCCAAAATGAAAAACATCACCAGGGTGATTATTCGTGCCAAAAAAACCGAACATTTCCAGTTCTTTTTA  
CACCATGCGATCGGTATTGCATAGCCAATATACTCGAATATGGCAAACGCACAATAAATAAACCAGCTAC  
TACACTAAAGATATATTTTAGTGTGCCAAGCCCGTGGCCACTAAGAAAAGAAAATATTCGTGAGTGTCTT  
ATCCTAGAGAAATTCGCAAATGAATGTGGTACACGTTGCCCTGAGTCCCTTTCAGGCACAGACCTGCGAA  
AGCAATTGACCACACATACCGCTTTGTTCAACGTTAAGGACATTCAAATTGATTATTTGGCGAGCTTAATG  
GGTGATCATAAAGACATTCATAAAAATTACTATCGTGTTGCTGCCTCTGTAGCGGGGGTGACCCAAGTTTC  
TCAATTACTTATGTCAACAATGAACATGGAAGAGGAAAATGCTGAAATTGCAGATGCTAATCTCGAGAGT  
GAGTTAATTTATTTAGCCCGTCTGTTGCGAAGAAAATTTTAATAATCGCTGCAAGTTTTGGACCTGGAAC  
GTCATGTTTCGGAATACTTCAATAGAAGTTTTTCAAGTATCGGAACCTTCGATACAGTAGAAGATACATT  
TATTTAAGAAATTAGTAATGGTTTTTGCGACCTATCCATATTTAAAATATTTTGATGGCGGGACCTCGGTC  
CGAGTTTTTTTTTAATTAATAGATTAACAATCTAATTTAATACTTATATTGCTTATTTTATTTAAAGCAA  
AATATTAATAAAATATTTTCAACTGTTTATTTAAACGAGCCCGAACCTCGACCAAGCCAACATAAATAT  
TTAAAACATGCGCATTCCGGACGGTATCAGACGAAGCAGCGCTGGTTATCGCAGGGGATGGTCCGCACAG  
CAGCAAGGATGCAAAGCATGGAACGATGGCAAGCACGTTGGGATCGCTCATCTAAAGGACGCTGGACGC  
ATAGGCTTATCCCAAACCTTGGAAGCCTGGATAAACCAGCAAGTATGGNAATACTAATTTTTACTTTAACGCA  
GCTCCTATCTGGCCACGGATGCTTCAGGAGCTACTTGAAGCGATTTCGGCCACGATAACACAGACGAGTGT  
TCTTGGTGCGGCAGTGGAATCGCAGAGGACGCCAACACATCATCTTCGAATGTGGAAGGTTCTCAGCGA  
ACAGGCAGGGACTGGAGGACAGCTTGGGGAGACCTATCACGGTGGACAACCTTGGTCAGGAACATGTTGG  
AGACCGCACAAAAATGGGAAGCTACCTGCACCTTTCGCAGCAGAAGTGATGCTGGAACCTCAGGAGAGTTG  
AGCGCAATAGACGGAGAGCGGAGGAAGTTTAGGTAGCAACAACATGCCTGTGAAGCAATGCTTTGCGGC  
CGTTCCGCAGGCAATCCACGCCACCTAATCATCACGTACCCCCCTACTATATACACCTAAGCTAAATAACT  
AATCATNAATANACTTTATATTTGTGCAAATAAACAGAATACAAAAAACAACACACACACACA  
>160\_rnd-1\_family-358\_\_Unknown  
ATGGAACACTACAAGTAGTACCTACAACATGAAGGTGTTTCTAACAATTCTCGCTTTGGCTGTTGCCTCCGCC  
TCGGCATTTCGAGTCGGTCGTCCACCCTAAGGACATTCCCAAGGTCAACAAGATCGAGGGCCGTATACCA  
ATGGTTACCCAGCACCTGAGGGCAAGGCCCCCTATACCGTTGGCCTGGGCTTCAGCGGTGGCTGGTGGTG  
CGGTGGTTCTATCATTGGAAACACCTGGGTCTGACTGCCGAGCACTGCACGGGATCTGACGTCACCGTCT  
ACTTCGGAGCCACCTGGCGCACCAACGCCAGTTCACCCACTGGGTTCAGCGGCAATGACATCATCAACCA  
CCACAACGCTGACATCGCTCTGATCCGCATTCCTCATGTGGACTTCTGGCACATGGTTAACAAGGTGGAGC  
TGCCAGCTACAACGATCGCTACAACGACTACAACAATAACTGGGCCGTTGCCTGCGGCTGGGGCGGTAC

CTATGATGGCAGCCCACTGCCCCGACTATCTTCAGTGCCTGCGACCTGCAGATCATGCACAACCTCCGAGTGCC  
AGCAGACTTACGGCTCTGCAACTGTTGGTGACAACATCCTCTGTGTGAGAACTCCCGACGGCAAGTCCAC  
CTGCGGTGGTGACTCCGGTGGTCCATTGGTTACACACGACGGCAACAACTGGTCGGTGTACCAACTGG  
GTTTCTTCTGCCGGTTGCCAATCTGGACACCCATCTGGCTTCCAGCGTGTACCTACCACTTGGACTGGATT  
CGTGACCACACTGGCATTCTTACTAATAAGCTACTGCTTCCGATATGACCTAAATAAAGCATACATATAA  
AAAATGAATACATTATACTCTTTTGTCTTGTGTTTGACGCCTATTTTACGTGAGAGAGCATAACGCAACGTAA  
ATAGATCCAGCTTCCTGCTAAGGCTCGTTGACAACCACTCAATGAGTCAGTTACTCAGTTAGCCAGTGAGT  
CAATCAGAAGATGTAGACACAACATACTAGGAAACGAGAAAAAAAGGTTGCAGACCCAACCTTTACATA  
ATGCTCATAGTGCTTTGACCGTATCTATGAAGCACAGGGAAAAATAGTTAATGCCGAGTTTGGTCAAGATA  
TCTTGAAAAACAAAAAAGGTCTTTAATCAAACACCAAGTTTGGCAGCCGATCGTTTCTATGACAGATATGT  
GATATGTAGTCCGATCTAAAAAAGATTTTTTCAAATTGAAGGGAGTATAGTGATGACTTTAAGTGACGTG  
CTTAATCAAACCTATTTTTTTAATGACAAAAACGTTTTTACATAAAACAACCTAATTTTTCCACCGATCATTCT  
ATGGCAGCTATATGTTATAGTGGTCCGATCTTAATAGGGTTTTGAATATATATAAGAAGCATCGAAAAACT  
AATAAATTCCAAGTTTGGTCAAAATATCTAAATAAACAAAAATTTTTATCACACAACAACCTAATTTTCGAC  
CAATCGTTTCTATGCCAGCTATGTGATATAGTGTTCCGATCCAGTTGGTTTTGACATATGTGCTGCGTGCA  
ACAGAAAGAAGGACTTCTGCAAAGTTTCATAAAAAATAGCTTTAAACTGAGAGATTAGTTCGCATAGAAA  
CAGACAGACGGACTGACGGACATGACTATATCGACTCGGCTGTTTATACTGATTAAGAATATAAATACTT  
TATGGGGCCGAGATGTCTTCTTCTAGGCGTTACACATTTTACGACAACTTATAATCCCCTTTCCAAGGGT  
ATAAAGGAGATTTTTGAAATAAAAAATATATTTTCATAGAATAAAAAATGAAGGATTAAAAACACTAACC  
GAACCATAAGCCTTTGTGCTCATGCATTTTAAAATCTGTTCTGGCTTCTTAAACTTGACTTTGGAAC  
TACACAAAATTTACATAAGACACGATTATCAAATGCATTCAAATCAATTTTATTTGATGTTTAAATTTAA  
TCTATTAGTAAGCGATGCCAGTGTGGTCGGAATCCAGTCCAAGTGGTAGGTGACACGCTGGAAGCCAGC  
TGGAGCGCCAGATGTGCACGAGGAAGTGCCAAAGTTGGTAACGCCACCAATTTGTTGCCGTCGTGTGTA  
ACCAATGGACCACCGGAGTCACCACCGCAGGTGGACTTGCCGTCGGGAGTTCTTACACAGAGGATGTTGT  
CTCCTACAACGGAAGAGCCATAGGTCCTCTGACATTCGGAGTTGTGCATGATCTGCAGGTGCGACGCACTG  
CAGCCAGTCCGGCAGTGGGCTGCCATCGTAGGTACCGCCCCAGCCGCAAGCAACAGCCAGCGTTCATTG  
AAGTCGTTGTAGCGATCGTTGTAGCTGGGCAGCTCCACCTTGTTAACCATGTGCCAGAAGTCCACATGGG  
GAATACGGATCAGAGCGATATCAGCGTTGTGGTGGTTGATGATGTCATTACGGCTGACCCAGTGAGTAA  
CTGGGCGTTGGTGCGCCAGGTGGCACCGAAGTAGACGGTGACGTCAGAGCCCGTGCAAGTGTCTCGGCAGT  
AGGACCCAGGTGTTTCCAATGATGGAACCACCGCACCACCAGCCACCGCTGAAGCCCAAGCCAACGGTAT  
AGGGGGCCTTGCTTCATAGGCTGGGTAGCCATTGGTGATACGGCTGGACATGTCCTTCATATGGACAGC  
CTTCTGCGTGCGGCAGGCACCGCAGCTCCAGTGGCGGAGGCAACAGCCAAAGCCAAAATTGTAATGAA  
CACCTTCATATTGCAGGTACAACCTTGGGCCTCGGTGGACCCTACTGTTGCTTTTATACGAAAATCAGGCAC  
AAACTCTATTCGCCATTATCTTAATTTGAGTGGTTCGTAAATTAAATATATAATCCGATCATAAAAAATGA  
ATTTTACAAGCCGATAACGAGTCACGATTTATGCAAAGTCTTTCGAATTTATGCGCATTT

>9\_rnd-1\_family-252\_\_LTR\_\_Gypsy

GAATGATGACAATAGCATTTTCTGGTCTACAACCATCANAAAGCATTTCTTTANATGGATGATCTAATAGTA  
ATCGCTTGTTCGAAGAAAACATATGGTCAAAAAACTTAACTGATGTTTTTCGACAAATGTAAAAAACTCAA  
CCTGAAACTACATCCGGTAAAATGTTCAATTTTTTATGCATGAAGTCACATTTTTTGGGACACAAATGCACTG  
ATAAGGGAATCTTGCCAGACGACAAAAAAATACGACGTGATTAAAAAAATTACCAACTCCCACACGATGT  
GGACAGCGCAAGACGATTCGTTGCATTTTGTAAATTACTATATGCGCTTTATAAAGAACTTTGCTAACTATT  
CACGTCACATAACAAGATTATGTAAAAAAGACGTNAAATTCGAATGGACGTCTGAATGCCAGAACATCTC  
AAAACAGCACTAATAAACCTAACGTTGTTACAATATCCAGACTTCACCAAAGAATTCTGCATAATAACAG  
ATGCAAGTGAGCAAGCGTGTGGAGCAGTTTTAACTCAGAACTTTACTGGACTCCAACCTTCCAATTGCATAC  
GCATCAAGATCCTTTACTAAAGGAGAAAGTAACAAGAGTACAACCTGAACAAGAATTAACAGCTATTCACT  
GGGTAATAACACACTTTCGACCATATATTTATGGTAACCATTTACGGTAAAAACGGATCACAGACCACT  
AACATCTATTTTCAATGGTCAATCCAAGTTCACAATTAACACGTATGAGGCTTGATTTGCAGGAATATACC  
TTTACGGTAGAATATCTGAAGGATAACGACAGTTACGTAGCAGATGCGCTATCGAGAATAACCATCAAGG  
AGCTACAAAATATAACAAGAAACATAATGAAAGTCACTACAAGACAAGCACGTAGACAAGAATCCTGCG  
CAGGAGAAAAAGAAATTGAATTGCCTAGGCAATCTATAGGAAAAAGCTTCAAAGCCCAAAGTGTACCAA  
GTCATTAACAATGACGAGGTACGAAAAGTAGTGACCTTGCATGTAAACAATATGACATGTTTTTAAACAT  
GGCAGACAAATTACAGCAAGATACGATGTTACCGATTTATATACTAATTAAACCATTGATTTAGATCAATT  
CTTTCAAAGGCTTGAAACGCAAGCCGGTATATATAAAATCAGCCAACTCAAAGTGGCACCGTGGGAAAT  
ATCTTTGAACACGTTTCAANGGATAATTTATATATANGCAATTAAATATATAAAATATATATATAGCTATA

TTGTCTAAACTGCATGATGATCCCATACTAGGAGGACCTACAGGCATTATAAAAAACCTTGGCCAAAGTCA  
AACGACATTATTTTTGGAAAGGTATGTCTAAACAAATAAAAGACTACATCCGCAAATGTCCAAAATGCCA  
GAAAGCAAAAACCTACAAAGAACACAAAACTCCTCTAACAAATAACAGAAACACCAATATCCGCTTTCGA  
CAGAGTAATCGTTGACACAATTATTACCATTACCTAGAACAGAGAATGGGAACGAGTATGCAGTTACACT  
CATTTGTGATTTTACGAAATACCTCGTCGCAATTCCGATCCCCAAATACAAGTGCAAACACTGTGCTAAAT  
CTATATTCGAATCTTTTATTCTGAAGTACGGTCCAATGAAGACGTTTCATGGNCACACGGACATGTGTACGG  
AATATAAGAATTCAATTATAAACAATTTGTGCAAGTATATGAAAATAAACAACCTTAACATCCACTGCACA  
TCATCACCAGACAGTTGGAACAGTAGAAAGAAGTCACAGGACTTTTAACGAATACATACGATCATATATA  
TCAGTTGATAAAACTGATTGGGGCGTATGGATCAAATACATCGTATACTGTTTTAACACGACCCCCCTCTAT  
CGCACACAATTATTATGAGCAAATTCTTGGTAAGCACCCAATTTACCAATATAAATAGAATCGACCCACT  
ATATAATGTAGAAGATTATGCTAAAGAAGTTAAGTTTAGATTAGAATCAGCATATAAAAGGTCTAGGATA  
NTGCTTGAAAAAACATAAAGCAAGAAGTAAGGAACTTTTTGATAAAAAAAAGTTATAGATTTTCAAGTAA  
AAATAGGAGATAAAGTCTTATTAAGAAACGAACTGGCCATAAATTGGATCCAGAATATATAGGCCCATATA  
TACAATAGTTAACATAGAAAATAGGGATAACATTCTAATTAAGATAACAAAAATAGGACCCAAAAAAGT  
TCATAAGGATAGACTAAAAATTTTTAACGAATAAACATATAAATGTTCTATATGAAGTCTTTATGTTTCTT  
TATGAATTCACAACAAATAACAAGTAAGAGGTTCTAGTCGGGAGCTCCCCGACTAGGGGATACCCTGAAC  
CCTCTTCTTCCAACATCAAATGCATATATAATCTATTTTAGAAGCTATATGTCAAGTTTGGTTCTAGTCGGG  
AGCTCCCCGACTATGGGATACCCTGAACCCTCTTCTTCCAACATCAAATGCATATATATTCTATTTTAGAAG  
CTATATGTCAAGTTTGGTGACTCTAGCTCTTATTATTTACCAAAATTGCCCAAAAAAAGATATCGATATTG  
ATTTTTATCGATTGCTTGGAACGGAGTAAGCTATCGATTATCGGAAATAAACTCGATCTGCGCGGGAAGT  
AGGAGCACCTACATCTAAAATTTCAAGTCTCTAGCTCTTATATGTTCTGAGATCCTTGCGTTCATACATAC  
GGATGGACGGACGGACGGACAGACGGACATAGCTAGATCGACTCGGCTATTGGTGCTGATCAGGAATAT  
ATATACTTTATGGGGTCGGAGATGCTTCCTTCTGCCTGTTACATACGTTTGGATTTTGCACAAATACAATAT  
ACCCTTATACCCATTTTTAATGGGTTTCAGGGTATAAAAA

>9\_rnd-5\_family-311\_\_DNA\_\_P

TGGCCCCATTAGTCAACAGGGCATGNTGTTGTGCTGCGCGAGTTANTCTATTGAGCCCGTTATTGTTTCGT  
GAATGCGATGNATAAGTAGATAAAGANCCTACACGCAAATACACATACGCACGTGCATATTCGGCGATTCC  
CTCTGCATANNTACGTATGTTTGGGTGNGTGTTCTGGCTTGCGGTTGNCAATTGCCCATGCTTGCTGTGCG  
TATAATTATGCGTTATCTACCTTTGAACGTCGCTCACTCGAGTTGCTGCCGCCGACTTTTGTCCACTTTGCG  
TCCGCGCAGCAGATTCTGTTTTAGTTAAACGGCAGCAGTCGAGTAAAGCTGTTTTANAAAAATTATAAGT  
GCAAATTCTCANGTGAATGCCATCGTATCTCTAATGCGAAAGTATAAAAGTCGACGAAAAAGTGAAATCA  
AAGCTTGAAGATGTCCATCGAATTTATGGACTTTACGCAATTTTAAAGTGTTTATTNTNTTGTAATTTTCTC  
TCACCTNGCCAAANAAGTCATGGGAGCGCGATGAACAAGAAGATAAGAAAATAATACAAGCATACACAT  
ACGCATGCANATANTTGGCGATTCTNNCTGCATACACATGTTTGNGTGNGTGTTGCGCGCAATTGATATCTA  
TTTATGTGTGCTTGTGCGTTATCTACCTTTGAGCAGACTCCCGCTTACTCCAGTTGCTGTGCGCCGACTTTT  
ATCTACTCTGCGTCCGCGCAAGATGATTCTGTTTTAGTTAAACGGCAGCAGTCGAGTGAATGTAAGTAAA  
AATTCTCATGGTGTACGTTACGGATCGGAAGTATTAATAGGCATTAAAAAAATTATAATATCAAAGTTTG  
AAGAAGTGCATCGATTTTATAGACTTTCATAAATGTTAATTTTTTGCTCACTTCTGAGAGCACTATGAAAA  
AGAAGATGAGNAGATAACTTGCAAATACACACATACATGTGCGTACATATTTGGCGATTCTCTCTTCATAC  
ATACGTATGTGCGTGTGTGCTTNCGAGTTATCTATTATGCTTGAATGTGTGCGNTATCNACTCTTGATCCGCT  
TGCTCGATTGCTGTGCGCCGACTTCTGTCCCGCATCGATTCTGCTTTAGTTAAACGCCAGCAGTCGAGTCG  
GGCAAANCTGTTTTAAANGAGTTGTACGTGNANATATCNCAANTAAANGCACAGCCGTNTGTNTAGTGGT  
CTGGCTAAGTTGTGCGANTCAAGAATGNATCAGGTGATTATTTAATTGTNATTTGCGCAATATCAGAAGGA  
AATGCACAAGCAATCATATACACATACATACATATGCAAGTACATATTTGGACTTGTAAGAGTGGAAGT  
CTAAGTAGCCATAAAAAAAGTCGTATTCTAAAGTTTAAACAAAAGTGAAATCAAATTAGAAGAAGGCCAT  
CGATTTTATAGACTTTTCAATTTTAAAGTGCTTATTTTATTGTAATTAGTCTCCTTTGCAAAAATTTCTGTA  
GAAACCCGCGAGCAGANAATNCACNAGCATGCATACATGTATAAACACATACATCTGTACGTATGCATTT  
GGCNATCCCCTCTCTTCTTCTTCTTCTTCTGCATATGTGCGAGTGTGTGTTCTCGCAATTCATATCTACTTAT  
GCATGCTCGGTGCTTCCTATGCGTTATCTGCTTTGAACGCCGCTCGTCGGGTTTCTGTGCGCCGACTTTTGT  
TCACTTTGCGTCCGCGCAGACAGGCTTCTGTGTAAAGCTGTTTTAATAAAATTACAAGTGCAAATTATCAA  
GTAAATTCCAATCGGGTCGGAAGTATTAATAGCCATAGAACTCGTAAAATCAAACCTAAAGAAGTCTAG  
TGTGTTTCTTTAATAATTTACAATCAATTATATACACATGTGTATGTGTGTACACCTTTTTACTTGTACGTC  
TCGGAAGTATTTAAAGCCATAAAAAAATTGTATTCTAAGGTTTGACGAAAATGNAATCGTAAAATTTAAAG  
AAGTCACANCNTTTNATAGACTTTCACAAATGTTTAAAGTGCTTANTTTACCGTAATTTCCATCTCGCTTCG



CAAATAAGTTCGTGGGNGCGCGATAAAATAAGAAGATAANGCACCGCCNCNCATATANACATGCGTACAT  
ACATACGTATGTATGTCCGTATGCATACATTTGNCGATTCTCTCTNCTTTCTACATATGTTCCGGTGCTGTGT  
TTTCGCAATTCATATCTACTTATGCTTGCTTGTGCGTTATCTNACTCGAGTTCGTGGATTGCTCGCTCAGTT  
TTCTGTGCGCCGGCAGTCGAGTNAAGCTNNTTGAATGTAAAGGCAAAATTCGCGGCTAATATCGTCCG  
AATCGGGAATATCAATTGACATGTTANAAAATCGCCTTCTGAGGTTTCGACGAGGTCAAAGTGGTTGCTA  
AATTNNTTTCGGTTCCGAAATCAAAATAAAACTCTAACTCTAAAAAACGTAATTTTCTTCCAAATTG  
GAACTTTGCTTTCTATCTGCGTCGAACAAACCAANATTTNNTAGNNCTCCGTCGATTTCGAAGNCTCTCNA  
ATCCTAAAAGGTACGTCTATTTGAAAAGTTTACAAAATACTAATTCATTTTTTATTTTGNATTTTGCAGCC  
AATCTGNCATGGACAANAAAACATTCANTANCGTTGGTACCTAGATGACCTTGGTATTTTCATGCCATGGA  
TATACCTTAAACAAAATCGNATTTAAATTTTGACCAAAATGGCAATGGTTATAACAAATTGTTGCTAATTT  
ATGTGGAATTTAAAGACTCGCGAATCCTTAAAGGTATGTATTTCCGAAATCGGACGTATTTTGTTTACAAA  
AACTAATATATTTTTCATTTTATATNTTTCAGCCGAATCTGCCAACGTTTCATGGACAA  
>Ref\_dvir\_1002  
GATTCGACCGAGTATGTCAAAGCCGTCTATATTATATACTTGGCCTTTTCTACTCCAAGTCTCTACGAAAC  
ATAAAATATCTGCTGCTTTTATTATAAAATCATTGAAATGTCTAAACTATCATTATGCAAGCCCTCAATA  
TTATGGAAATATGTCAAATATTTTCTTCTACTCTCTCAAATATATCTGATGGTGGTGGTCAATTTTTTCT  
CGCCCCGGAGTTTTTCCAACCTCAATATAGACGGGGTTCGGTAGCTTGTATTTCTCTAGGCGGATTAACTTT  
CCTATAAGGAAAAGCCCAGATGCATTAGTCGCTGTGCTACAAGCTACGTATAATGCTGCACGGCTCATGC  
CATCTTGCAAATGCACTGCAACTTTTAGGTAGGTTGCTCCCTGACTCTTGTGGATGGTTATGGCTTCAGCA  
GGAACCACTGGAAATTGCAAGCGTTCAATTGTTACTTGGTCAATTTTCCCTATATTGAAATGTTCTTAAAC  
TCTTTCAATCGGTGTCCAATCAGAGTGCAAAGGATTTGTTTTTTTTTGGCTCTTGCTTGCCTCCACAGTT  
GCTTCTGTAAATTTAAGCCAAAGCGTCGAAACTAACACATCAGATCCGCAGGCTGTATAGTCAATATGCA  
TAAGCTGTCCACTTGCTCCATTGACCAAAACCAACATTGGTATTTATATTGACGGTAATCATATAAATATTG  
AGCTGGGAAGGCCTTGGGTTTCGGAAGTCTTGAATGCCTTAATATTTTTTAAATATTTAGCTTGTTCCTTT  
CAGATATTGATTTGGCCTTCAGCATATCTTTAGATTTTGAAGTATATTCTTCAGTAATAATTTGGCTAAGTC  
GGATATTATTGTAGTCGCTCGCTTTCTCATTTGAGTAGAACAATCTTATAGCATCGTTGGGAATATTATTTA  
TTTCGGAAGGCAAAACAATTCTCTGTTGAATAAGCAGCTTGTCCGTGTCAGTCATTTTCTTCTGACATATT  
ATTTAATGCGATGGCAAAGGCGCAATCCTCACGTTGCCGCATTATTTCCGGTCAATTCAAAATATTGAAATA  
AATCCCAAAGTGGTGCTCCCAAATTATGCTATATGGGTCTCTCGAGTTTGGAGCAAAAATCCATCTATCG  
CCAACCTGGTGGAAAGCTGCTTTAGATCACCAAATGCCAATATTGAAATTCGCCCAAAGTATGTATTATTTCT  
AAAAATTTGCTTTAGACGAAGATCCAAGTACGACAACATTTTGCACCCACCATTGAAATTTTCATCAATAA  
TAATAAGCTTTAAGTCTATAAGCTTTGAGTGCATAGTGTGATTGCGTCGTTGCTAAGGGGTCTTAATTCC  
ATTGAATATTGGTTAACAGGCAAAGAGAACACGGAATGGAGAGTGAGTCCACCAATTCCAAAGGCTGCTT  
TGCCAGTTGGGGCACACAGCAATATCTTTGCAGAATCAGAGTCAAAACCAACTCTGGTGTTAAATCTTAA  
AGTTAGTGACTGATATATAGTTGATATCAGCCTACTTTTTCCAACACCCGCCCCACCTCCAACGTATTCAT  
AAAAATATTATGCATAAAGTGAGCGTAATATTGTCGTTGTTTACTATTAAATGATCGCACCATTAATTA  
GCTCATTTTCTGGAACCTGTGTCAGGTAATTTAATCATTTCGGATTGCATTTTCATCACAGTTGCCTTCATGCA  
CATTATCTTCAAATACGTTAATGTTTCAAGCAACTTCTGATACTGCAAAACCCCTGAATTCTTCACCAAGC  
AACTGAGATGCTGAAATTTCTTGTCCATCATTATTGTCATTGTTGACTTCTTGGATCTCAGCTAAGACTTCT  
TGAAAATGAGCCTCATCCAAATATTCATATCGTTTTCTATTTGATTTCGATGATTTGAAATTGTGCATTGAAC  
GTTTGCTCATAATCGGTGCTAAGAATATCCACTTGCTCATTTTCGCCAAGGGAAAAAGAGCATTACAAGTTC  
TCGAAAATAATAGATCGGGATATATTTATGCTATACCTCTCCACCGAAAAATAGAGAGTGCCTACGTTCTC  
TCAAAATTCCTGATCTATTTTTGAGTACCATGGGAATCCCGTCATTGGCATTGTCTCCCGCTCTTCATCAT  
AATTTCCCTCCTCGTAGTCTCCTGTAAATGGGCATTTAGCGACTTAGAATATTTAAATTTGGCAGCAAAG  
TCAGCTAGGCACAAATTATTTAATTCGTCCGGTCTTTGAACATAATGATCTAGAAAGTTTGGTAAGAAATA  
ATCTTTTGAATCTGAAGATACTGTTTCTAAATCTCTCTGGGCTTTACCATAACCAACTCTTTGATCAGGATG  
CGAAGTGTTTACAAAAATCTCGCCATGGCTACATCCTGACATACGGAGTCCAAGGATGTTGTATGAAGCC  
TCCAGCGCAGATATTTCTGTTCCATTGATGAACTTATTGCCGATATGTTGTAGTTTTTGTCTTAACTGAATTG  
TTATTACTACTTATCTCGCCCATGGCTTCTCGCAATAATTGAGAAACCCCTCTATTCGATTTGTTTATGTAG  
TTTATTATATAACTTCAACAAGCAAACGCATCTAGTATGTATTGAATATCCATGTTGGCTCTATATAGCTTC  
AAATATCTTTATTATATGCATTCACCATTTTGTACATATTTTCTACGCAAAATATTTGCGGCTTTTAACT  
CGATCTCGTGCAAATTATATCCAATATAATAAACTATCAAAATATTTAAGCTTAAGGCTTCAGCGCCCCG  
AACTGAACATATCCAGTAGCTCTTTGATTTTCTTCCACATGTCTTGATGCCTTCTCAGATTTGAATCTTCCT  
CTTCTAGG

>160\_rnd-5\_family-7347\_\_LTR\_\_Pao  
GGGATGACGTAGTGCCGTTAGAAGAGAATGGGAGAAGTTTTTAACGGAGTTGCCCAATATTTTCAGACATA  
CGCATACCACGATATATAACATGGGGATTATATAACGCAGCAGCAGAACTACATATCTTTTGTGATGCAT  
CAACTCAAGCCTANGGAGCGGTTGCGTATTTACGTGTTCCAACCGGGGATCACGCATTTTCATACGGAGTT  
GCTGCTGTCAAAATGTAAGGTCTCGCCTGTAAAGCCGCAATTAACCATACCCAGAGCCGAGTTGTGTGCTG  
CTCTTGAAGCTGCAAAAATGTATAAGTATTTAAAACAGAATTTGCGAATTAATATAAACTTCTGCAGTACT  
ATTTTTTGGTCCGACTTAATGATAGCCATCGCGGAGGAGGTGCAAACTGGCAGGTATTTGTTTCAAATCGC  
ATAAACAAAATTCTGNAGATCATCTGAGTCGGGGAATTAGCGTATCTAAGTTGACGGCATGTGAAATGTG  
GTGGCATGGACCGCAGTGGTTACAAGGNCCGGAAGAAGGATGGCCTTGCAATAACATTGATCAACAGTCC  
TCTCACATGTGTGTATTGAGACAAGAAGCTTGACTTGCCACAAAATATCATTGGAAGAGATGCCTAGCTC  
GATGTTTCATAAGTCAATATTCATCGTATACCCGACTTCTTNGAGTATGTTAAACGTTTTATTTCGAAACTGTC  
GCATAATAGAGTCTGAGCGCAAGCGAAGTGAGTTATCAACAGATGAACTAGAGGAAAGCCTCAGAGAAG  
TAATAAGATTGGTGCAAAAGGACTGTTTTGAAAANGAATGGAAGGCACTCTCTTCTAGCAAGCCGGTCCC  
AAGAGATAGCAGTTTATTACCTCTCAACCCATATTTTGATTTGGGGGAGCTCGTCTTACGGCTCGGAGGAA  
GATTGCGCGACGCCTTGTTGCCAGTGAATGAGAAACATCCAAATATATTGCCCTATAAACATATTTTCACGA  
GTCTTGTCGTAAATTATAGTCATGCTTGACCTTGTCATGGAGGCTCATCGCTCACACTCAATTATATAAGA  
AAGAAATTTTGGATCATCAATGGGCGTAACGCAGTTCGTTTTGGTGTACATAAATGTGTCACGTGTTTTAA  
AATGAAGCCTNAGTTTGCAAGTCAACAAATGGGAAATTTGCCAGCGGTGCGTGTGCGGCCCTCAAGAGCT  
TTCTCATCTGCCGGAGTTGACTATGCTGGACCTATTAATATTTTCGCCATCCAAGGGAAGAGGACGTGTAGC  
ACAAAAGGGATACGTTGCCGTGTTTATATGTTTGGTGACCAAGGCTTTACATTTAGAGCCAGTTGGAGACT  
TAACGTCAGATGCGTTTTTAGGAGCCTTACATCGATTCATAGGCAGACGTGGTCTATGTACAGATATTTAC  
AGTGACTGTGGTACAAATTTTGTATGAGCCAACGAAAACTACGAGCTGATAGGGAGGCATACTACTCAT  
ACATTTCAAGATTAATCGCGCCAAAATTGCTGAATAAGGGAATCACTCGGCATTTCAACCCTCCATCAGCT  
CCACACTTTGGTGGATTATGGGAAGCCGGAGTTAAGTCCATGAAGTATCATCTCAAGAGAACCATTGGAG  
AGCGAGTGTTAACCTTTGAGGAAATTGCGACAGTGTTAGCACAAATTGAGTCTTGTCTTAATTCAAGGCCT  
CTATGTCCTATTTTGAATGATCCTGAGGATTTGATGGTGTAAACCCCGGTCACTTTCTCACTGGTGTATGCG  
CTCTTGTCGCCTCCTACANCTGAAGTACCTCAACTGAGTTTGTGTCATCGGTGGAGAACTGTCAATACTA  
TTCACAACAATTTTGGAAAAGGTGGAACCTCTGAATACTTGACACGGTTGCAGAGAAGACCAAAAATGGCTG  
CAGATGAAGAGAAACCTAGATGTTGGATGCATGGTGTAAATNAAGGATGAACGATTCCTTCGCATCGGT  
GGCCTTTGGGTGCGATTACAAGCACTCATGCTGGTGCAGATGGATTAGTTAGAGTTGTGACTCTAAAAAC  
AAGCAGTGGTGTATCAAACGGCCAGTAACAAAGCTCTGTCCATTACCCATACAAGAGAATTGGCTTGAT  
AATGACACCTAACCTTTACGTAAATGTAAATTGTACTCTTCTATTTTCAGTTTAAGTTAAGGTACCAAGC  
CCGAGACTCTGAAAGNTGGCGGACGTAAATTTGATGATGAATGCTGCAATCATCAAAGGGGGGAGAATGTT  
TGGGCTACAGCCNACCAGCAAGAGCAATCGCGCCGCGCCTAAGAGCGGATATTATAAGAGAGCGCATGAA  
AAGAGCGATTAAACGAAAATGCACCTGCGCTTAGATCAGCCGNATTTAAGTAATGTCTTATCACTCAATGG  
ATCACGCGCTATCACGGTTGAGTTGAGTTGAATTTAGTGGCTCTCTCAAGCGCTCGAGCNTTCAGTCTGT  
TACTTTAAGTTATCTTACTTTCTTGTATTTTCGTAATTCTATTGAGCTTTGAATTTGCCCGCTTAGTAACAGC  
GGAATTTGCGACACATGTGCAAGTCTGTGAGCGTCAGTCCAAGTCAACGGACGTACGGCTCTGTGTAGGT  
CAAATTAATAATTATAGTATTTTLAGGTTAAGTTCAATAAAAGTTGAAGCCTTAAATGAACAGCCCCCTC  
GTGAACTGGGAGTCTTTTGCTAATCTCAACATTCCCANCAATCGTGCAAAACCCTCAAAGCCGCTCGGTT  
GGTAACCACGCCGCAGGCCGCATCATATCTACGGGNAGTTTGGGGCTCCGCACCTGGCGCAGCCGATATC  
CAACA

>Ref\_dvir\_847  
GCTCGTGCGTATATCTGACAACAAATACATACCAGCAAGTTTGTGCGCTTGCAAGTACATATATATGTATG  
TGTGAATATATAATTGCGACGAGTGTGCAGCGATAGGTAAATTGCCACCGTGTGATAGGATTACATGGCG  
ACTTGTTATGATATGGACACTATAATTGGCAGCAGCGATAATATTACATCATCGAGGCGTGCCATTTGATC  
GTCAAGTGAGATTCTATATAAGATTTGTTTTAAATTTAGGACTGGATCCCTCGAAAATATTTCAATGGAGA  
AAGTTACTATATAAACATGTGTGCAATTGCAATAGTAAGATTTGAGGCGGTTGCCATTCTCTCACACTCGA  
AAAGGCAGTTTCCTTGGTAGAAAACATTGGCATTAGCTGAGCAATCCGGGAACCTAAGTGGCTCTTGTAT  
TACAATCTGCCACATATAGAAGTATTAAGGAGAGTATTTAAATTATATGTAATTAATGCACATATATATAC  
ATACATGTATGTACATATATGCGCATACATGCATGTATATACATACATGCACGCACATACATACATATATA  
TAAGTAGTGAATGAATCTTATTGATTATAGATGAAGCGGTTTTTGATGTTGTTGCTGGGGCTGCTATTCGG  
CGGCGGCTGCTGGTGTGCTAAACGGCTGCTAATGAAGATAGTTGCCAGCTTCGTGCAGCAGCACTTTGTT  
GTTGATGTTGATTGTTGTTTTTGACAGCCGCTGGTTGACATGTTTTGCTGGTGACGGTAGCGAGGATGATGA

TGGTGAAGTTCAATCAGCTGGGCTATACTTGGGCTGAGTGCGTTGTCTTTGTGGTTGCGTGTGCGTGTAAAG  
TGTATGATAGTAGCGGCGTTATGCGTCTGTGTGCGCACTGGAGGGGATGCAAATAGGCGGCAATGGATGG  
GCCGGCGGCAGGCGGGCTGGCGCGTCTGTGTGCGAGTATATAATTCTGTGATGGTGAGGCAACGTTTGCT  
GGGCATTGGTTATGTGAGTGTGTGCCAGCATACGGAAGTGTGTGCTGGATATTTATTTGGCACGCGTTTGA  
GTGTGAGCGAGTGCGTGCATCTGATGTTGGGCGCAATTGCGAAGGATGACAATAAGCGAGCAGGCAAAC  
TAGAAAGGTAAGTAAGTAAAGGTAGGTTTGAAGATGTTTATGAAAGAGGTAAGTTGGAGTTTCTTTTCT  
TTTCAGTTAGTTGATAGGTTATTTGTTTCAGAGCCTTAGATGGAGCTGGATGAGGGTGAAGCAGCTATTTGA  
ATGGAATCGTCTCCATGTCGGAATAATTCCTTGCATTTTCTGCTGCACATCACTCATGTAGCGAGTCAACTT  
GTCCAGTTGTTCTTGTGCTTTGGGCAAGCTTAACCAATAGTTGGGTGGTTGAGTTATGCTCAGTGGAAG  
GAAGAATAGGGGTTTGATGATGTTGTTGTTGTTGTTGTTGCTGAAACTCAGCATCGATTTGCATTGGC  
GTAGGCTCGTGCTGGTTCAAGTGGTGAGCAGAGGCAGCATTATGTCGTGTGGACGTAAGTGTATCTAGGT  
GTTGGCGCTGCATAAGAACAGTTTGATCACGATTGATCATCGAACCAAACTGTTCAATTTGACGCTGCTGT  
TGCTGTTGTTGGATGTTTTGAGTTTTGGGCCATCTTAGGCGCGGGTCCAAATTTGCGGAAGTTCTTGATAT  
ATTTCTCGTTGCAGCTGCTGTTGATGTTGTTGTTACTGCTGCTATTGAGGATGAAAGATTGGCGCTTGGTGC  
CGTTTTGATAGAGTTATGAACAGGAATGGTGTGAGAATTAACATTGTTAATTGGGATATTGTTGTAATTAT  
TAATGATGGGAATATTTGCGGCTTTGATAACATTTGATCGTTGCCTTTGCGCAAGCGCACGTTCCATTTGT  
GCTCGCTTGTGTTGTTTTGATTTTTGCTTGCAGCGCTTTGGCTTTTTTGTTTTTTATTTGTTGGCTTGGGCAAAG  
ACAGCAATGTCGGCAGCTGTTGTTGCAATGGCAATTGCAATTGCAGTGGCATATGAGCCTGTTGACGTTGC  
TGCGAGCGTATTTGTCGCCTTTGCTGCCGCTGAATATTCGGATTGCTTTGTCTCGGTAACAGTTGCTGCCTT  
GACTGAACGTTCCGAATGTTTGTATTTGATATTAGTTTTGATTTTCAGCAAGTCAAGATATAAGGGGCAGCC  
CTTATAATTGGCCGTGTGTGATTGGGAGCAGTTGGCACAGTTTGCCGGTAAATTGATAGGCTTAGTACATT  
GTTGCGATAAATGCTCCTGGCCGCATTTACGCAGCGCGGATTGTGACGACAGTAGCGCGCCGTGTGATT  
GTATCGTTGGCAGCGGTGGCATTGAGGCAGTTTCTGTGCTCGGTTTTTGGCCACTCAAAACGGACTAAGA  
ATTTGCATAATTCTTGGACGTTGAAAATTGTTGTTGGATTCTTTATTGAATTATGAGCTAATTCAATAAAG  
AATAGATTCGGGCAGTGATGACCGGGATTACTGCGATTCCGATAAACAGGGTTATATACATTACGTATTA  
TGTAGCCCATATCGGATAGCTCATTTCATTTTGGTTCGTGCTAATGGGAGGCTGAATGCCTCGTACGACAA  
CCCGAATTGATCACGTTTCTGGTAAGTATTGAAGTTAATGGACCTGTCCAGTTCCACGATATGTATGATAT  
CTTCCTTGTGTTTGAGTCCGATTTGGGAAAGATTCGTAGGATGCCAGGGCCCCCAATTTTACGCCGTATCC  
ACTATGGGGGATTGGCCCTTTTATTTGGCCACTACAATCAAGGCATTCCAAT

>Ref\_dvir\_718

CGCCAAAAGAGAAGTAAGAGACACAAGAAGAACGCCAAGTGCCAACGAAATCGGCACAGGCATACTAC  
AATAGTGTGCAGAACAAATACACACACAGGGCAAAGGAACTGCTTTACCGACAAGTGCCAACAATTTTCG  
GCACACACATAACGCAGCAAGAATAAAGCTGCTTTGCAGTCCTCCTTTACCAATACACTCATAAATTCT  
AACATAATTGGCACTCAGCAACAATAATTACAGCAACAGCCAATACAGCATCAACAACAAGTTAAACCTT  
GGAAGCTATTTCTCCAACAATACTATCCCTGTGGCAGCAGCAACAGCTACAACAACCAGAAGAAATTTGA  
TGCCATCATTAACAAAATCGCCACCAACACAGACGCTAACGACAACAATAGAACTACCAGCAATGACA  
AAGCAACACTGCTACAAAATGGCTATCAGGTGTGCCACCACTGCTGCCCAGCGAACTACCAAAGCCTCA  
ACTAGCAACGATAAATACCTCCGCCACAACGTGGCGATCACCTCTGAAGAGAAGATGTGTGGATATGGAC  
GAGTCTGACTATGATCCCGCTCTCAAATACTACCGTTAACGACGCCCATCTTTAAGAGTGGTTTCGCTAT  
CAAGCTTCACCACGAGGCACGCCGCCAACAAATGCTCTAAAGTGAGGCAGAGCAACACGGACATCAGAC  
AGCACAAAGAGGGCAGCAGCCACAGAAATGCCAGCAACTGCAACCGCTACAACAACAACAATCGCAACA  
ACATCAGGACGAGAGTCTGAAGCAGGAATCGAAAGAGAACTTCCCCAGCCAATCCAGCAACAGGCAAC  
ACAAGGCAAGAAAGTGCCTGTGCTCTTCTTGCCAATGGTGCCCGCAATTATCTGGATAAACTGAAAAGCA  
ATCCAGGCGTGCGAAAATTCTGGACAAAGGCAACCTCTGGCACTGGACTAAGTGTTCAATGTGAAGATCT  
AGCCACGCATAAAGCAATTCTATCCGCCCTGGCTGAAGAAGGCACTCATCTGCATACGCACCAACTGCGC  
AGCGAAAAGGAATATCGCATAATCTTACGGCATATCCACCACTCTACAACCTGTGAATGGTTAGCGGCCA  
ATCTAGAACAAATGGGCTTTGTCACTCGTTTCATCCGAGTCAAAAAACACCGGTTTACAGGCAGGCCGCT  
AAATTTGTTTGAACCGAACTGCAGACCAAAGCGGATGGGAGCCATGAAGGCATCCTCAACCTGAAAGA  
GCTGGGCAGCCAATCCATCACGGTCGAGCGGCAAGCAAAAACCTCGAGATCCAGTGCAAGTGCCATCGGTGC  
CTTTGGTCTTTGGTCACACGAAAAAATATTGCAGGCGGCCCTTCGTCTGCATGAAATGCACAGGCGAGCA  
CATGTCAACTGCATGTACCAAACCCAGAAAGGTGGAGCCTAAGGCGCAACGTACGTAACCCGGCCTAAA  
GTCATTTGGCTCCTTCCAGCGGCAACTACGTTTGCACAGCATCAAAAACAACATCCAAATCTTTCCCCGGG  
GCCAGCCGAAAGATCCAGCAATATGTCCTATAGCCGGGTTGTACGAGATGGCGGCAATGCCACTGTCCGT  
GAACGAAACCCAGCCTAAAAGCATTGAGAGCTCTCCAGCAGCCACTACACAGACGGCAGAAGCAACAA

CAACAACATCATCTGTACAATTTTCAGGAAGCAAGCAACATCAACAAATAGAAGAGAGCTACTCCAGCCA  
GTGGTGCCTAGTTGACGCACAGCCGTGTGACCCCTGCCTCCTTGCCTAATCCTTTTCGGAAATCAAATGGTA  
ACTACCCAACGGGGAGTTCCCCAACGGCATAAATGGGACGAATAACAGCAGCTGGTAGGGCAACAATCA  
CCAATGTCCAAAAGCAATATAATCCAGAAGTTGGAACAAAACATGGCAATGTTCACTCGCATGAAACGAG  
GAATATATACTTTATTAAATGTCCTTTTGCAATTGCCACTCATTATAAAAAACAATAACACAAATACCAATA  
ATCATGTGTTGTAAAACACAGCTCAACAACAATCAGACAGCAAAACAGTCCAAATGGACTGCTCTATGGA  
AGCTGCCATCGCCAATGAATCCATCAATTATGTATAGTCATCCACACGGTAGTACCGCCGCTCAATCGACT  
TTAGCCACTAATACTTCCGCTGAAAATGTCCGCAGTCCGGCGCCAATCAGTACAGTAAATTACATCTGAC  
CATCCACAATGCAGCCAAAATAGCAACCCATTTAAAATTGCTTTCTGGAATGCATGTGGCATAGGCAACA  
AAATGACGGAAGTTCGAGCTGTACATGCGACGCGAGTCCATACAAATCATGATGGTCATCGAAACTCTGGT  
CACGACACTAACATACAAAGCGTATCAGGCTACCACACGTACAGTGTAAACCCATCCACGCATGCATTGTA  
GAGGGGGGGTTCGCTATCTTTGTGCGTAACGATATCAGGCACGCTGCCCTCCAGCCAATTAACGCGAACTT  
TCTCCAGAGAATGCCTATTGCCCTGTTGCTTGAAAATGAGAATAAAAGGGAAATAATTATAATTGCCCCA  
ATCTATTGCCACCAAGTGTTCAAATGGTCCGTCGAACACTTCACAAAACACTATTCAAACATTTTGACAACCT  
CATCGATCCGGCTCCATCTAACTTTATTTTCTGCGGCGATTGGAACGCCAGCACTCATGGGGGGCACTGT  
CCTTTGTCGTAAAAATGTCCTTGCCACC

>Ref\_Helena\_2\_2014

ATGAATCCACTCAAGATCCTTATCTGGAATGTTAATGGCATCGCAGGAAAAGCCAGTGAAGTTGAGCTCT  
TCGCGCACAACAACATGTGACATTCTCCTTCTAAGTGAGATCAGACTAAACCGAGGACAAACAGTCAA  
AATACATGGGTACACCTTCTATCCAGCTTACAAGCCATCACGTCATAATCACGGTGTCTGGAGGAGCGGCG  
GTATTCGTGAGGAGTTCTCTCCGCCATTTTCCACAAAGAGTAATTGAAACGAGCACTATACAAATGTCTTC  
AATAAAAGTTGCCACTGGTTTGGGAGACATGGAATTTAGCGCCATATACTGCCACCAAGAAATAGAATT  
GAAGAAAGGCATTTTCAGTGACATACTCGCTTCTTGCGGCCAAAGGTATCTGGTTGGTGGAGACTGGAATG  
CGCGACATTGGCTGTGGGGAGATACCTACAATTCACCCAGGGGGCCGAGAACTAGCCGAAGCCATTACAGC  
CAGAGGAGCTAATATTCTCGCAACAGGATCACCAACTAGGTACCCATATGTGCCTAGTCACACACCTAGT  
TGCATTGATTTTCGATTATACCATGGGATACCGGATTCTCAAACAATATCGGCCAAAGCTGGGATCTAG  
ACTCTGACCATATAGCCCTTGTTGTAAATTTGCAAACCTGATGGTTCTTATGTACAGGCCAAACCTCGATTA  
ATTACCAACCGTACTGACATCATGGCTTTCAGACAACATCTTGAATGCTCGATTCAATTAAATCCCACCTT  
GGACTCTGGAGTAGACATTGAGAATGCAGTAGATTTTCTAACTGAAAATATACATAGCGCTGCTACTGCC  
ACAACCTCCACCCAACACCGAGTCACGCCCCATTCTGTTATGGCATTGTTCTCACGAGGGAGGCTAAAGAGC  
TGATGAGAACAAAGAGGTGCCTTCGAAGAAGAGCAATTCGATCACAAGATCCTTGGGACCGAATTTTGTG  
GAACCGAGCAGCAAAACAGCTACGTATCCTCCTAAGGGAACCTCAGAAGTGATTTCTTCGAGCAAAAACCTG  
GCTTCCATGGACTACACCGTTGATGCAAACCTACTCTCTATGGAAATGTACAAAATCACTCAAACGACAAC  
CCTTTAGACAGGTTTCTGTCCGATGTCCTGGTGGCGAACTTGCTAAAAACGAAAGGGAACAGGCTAATGC  
TTTCGGATATCATCTTGAGGAGCGTTTCACTCCTTATGAATTTGCTACGATAGAGCAGACCAGGGAGACCC  
ATCAGACTCTTCAGACCCCCCTGCAGATGTCCCTGCCTATTGAGCCTATAAGGATTGAAGAAATAACTGAC  
GCGATCCAGCTATTGCCGAAAAATAAAGCTCCGGGTATCGATAGAATCTGTAATGCTACGCTGAAAGCCC  
TGCCTACAAGCGCGCTTCTGTATATAATGCTAATTTTTTAACGCTATTATCCGGCTCCAAGTGTTCCCAAAG  
CAATGGAACTAGCAGCAATTATGATGATTCACAAGCCAGGCAAACCAGAAGCTGATCCTGAGTCGTATC  
GGCCAATAAGTCTCTTACCCTCCCTGTCTAAACTATGGGAGAGGACTATTGCCAAGCGGATAACTGCCATT  
ACAAGCCAATGCAATATCTTGCCGGATCACCAATTCGGATTTCGAGAGGGACACGGCACTGTGGAACAGG  
TCCACAGATTGGTGAAGCACATCATGCAGGCTTTTGATGACCTAGAGTTCTCAAACGCTGTCTTCATTGAC  
ATGCAGCAAGCGTTCGATAAGGTGTGGCACGATGGATTACTGTACAAAATAAAAAACCTTTTACCCGCAC  
CGTACTATGGCCTTTTAAGGTATATCTGGAAGGACGCGAGTTCAAGGTCAAGGTAAAGGGACACATACTC  
CTCCACCTATACTATGAGAGCAGGAGTGCCACAGGGCAGTGTTCTTGGTCCGCTGCTCTACTCGTTGTATA  
CCTCAGATATACCCAGCCCTACCTCTCAACATATGGAAGATCCCTCTAAGGCTATCATTGCGACATATGCA  
GATGACATCGCAGTCATTTATAACTGCGAAAGTTGCGTAGAAGCTAGCAATGGACTTCAGGGGTATCTGG  
ATACTCTCGCAGCTTGGTGCAAACGGTGGAACCTTGAAGGTAAACCCGTTAAAAACTATTAACCCATGCTTC  
ACCCTCAAATGCGGATGCATATCCCTCCAATTCAGCTTGAAGGAGTTACCCTGGAGCAGCCGCCACAAG  
CTAAGTATCTCGGCATCACCTTAGACAAGCGCCTTACCTTTGGGCCACACCTCAAAGCTACGGTAAAAAA  
ATGTCGGCGCAGACTGCAACAACCTGCGGTGGCTCAACAACAAAAGGAGCACCCCTGCCGCTGAGATGCAA  
AAGAGCTGTATATGTGCACTGTATTTTGCCGATATGGCTCTATGGAGTGCAGATTTGGGGGATTGCAGCCA  
AATCAAATTATAAACGCATACAGGTACTGCAGAATCGGGTATTACGACAGATAACCAACTGTCCCTGGTA  
CGTACGCGGTTCTACACTCCATAAAGACCTCAAAGTGCACACAGTCGAAGAACAGATTGGAAGGCACACA

AGCAGATACAGCGACAGACTGCTGAGACACCGCAGCCTGCTCGCCAGAGGACTACTCCCTGCCCAACCTC  
TAAGGCGACTCAAACGGCAAGGTTTTGCCAAGACGATTGGGCGC  
>9\_rnd-5\_family-1262\_\_LTR\_\_Pao  
ATTTCTGTTGGGTGCTCGAAATGAGCTGAAGGAACTGCGCGACCTGTTTATAAGCGATCCCCAGCGCAATGA  
GATTGTTTCGCAACTGCCTAGCTCTGGGAATCAACTGGAAATTCATTCCGCCCCGTTCCGCCACATTTTGGAG  
GATTGTGGGAGGCCGCTGTCAAGTCAGCAAAATATCATTTTTACCGCGTCGTTGGAAATTCTCTTCTCTCA  
TTCCACGAATTCCGAACTCTCATCTGTCAAATATCCGCAATGCTTAACTCAAGACCGCTTTGCTATATTAC  
AGAAAACCCGAATGACTTGGAGATACTCACGCCTGGGCACTTCATCTGGGGCAAAGCCAATGCCACTATC  
GACGAGCCAGACATAACTCACCTAAGCATAGGTGCGCTCAGCCGTTGGCAGCGAATATGTCACATGCAGC  
AATCATTTTTGGAAGAAATGGAGTACATCGTATTTGTCGTTGCTCCAAGAGCGCGGGAAATGGCGATCGTC  
CAAGCAAAATCTTCAGGCCGGCAGCATCGTGCTGCTCAAGGAGGACAATGCACCACCACTCAGGTGGCCG  
CTTGGTCGAGTCGACAGCGTCATCACGGGTGACGACGGCATTGTGAGAGTAGCAGTCATTTCGTACACAAA  
ATGGTCTGGTCAAGAGAGCCATTGCCAAAATCGCCGTTCTGCCAATCGAGACCACATCGGTTGAAAGCTT  
GTATCTTCCAACGGGGGAGCATGTTTCGCAGCAGAACGCCCTCTGAATAATATTATATCTGAATTACAATAT  
ATCTTTACTTCTCAAATCACGATATTGAAGTCACATACTATTATTTTTAAACCACCATAAAATACCATTGTA  
AATTGCTCATCTAATCTATCGATAGTTATTGTTGAAAGTTCGAGAAGTAAATCACGCATTACAAGCAGT  
CTAAAGGCTCCTTTGATTTTTTATTAAAATTTATAAAACATAAAAGGGGGCCGAAGTGGGGTGCAAACCTAGC  
ATCTCCTCAAAACATTGGTCGCCTCGCCGCGAATCTTNCTTTTCGTTGTTTCATCGCTCTTTTGCTGCTGCAGC  
ATAGGCACTAAACTCAAGTACAGACATATGTACATATGTATGTACGTATTTTCGCACACCGGCTCGAGTGC  
GCGCTTCTCTCTAACGATCTTATCGCGTTATTTAGCAGATCGGCTATTATAACCAAGCTGTTTGGTGCATAT  
CGGTGCCAAGCACAACCGTTTGCTTAGAAAGGAGCCGTCGAGCAGATACCTACATACTTACATACATACA  
TATGAATGTGAATGCAAGTGCCGCTACAATTGATCTCGATACATACACATACACAAGCCGCTGCACACAT  
AAAACGGTAATCGGTCAAGGGCAAAGCTCTTCTCCATAAGTGAATTTTGGTGACAGGCCGGAGTACAGTG  
AGCACTCAACAAAACGTACCAACCGAACATTACCTCGCCAACAACAGAATGGAAAATTCGACAAGTGAA  
AAAGACTTTTGCAAAGCCAAATGCGCTTCTGTTCAACGCCAACTATTAGCAATGAACGAATTCTTCAGCGC  
TGGTGAGATGATCAGCTTTGACGAGGCCGATCTGATGGTGCGTATAGAATCTGCGGAGAGCATGAAGGCC  
GAGTTTGATATCAGCCAGTCAAGGCTAGAAAAATTAGATTTGCTCGAGCTTTCAACGGACGCACGCTCAG  
ACTTCGAGAAGGTTTACTGGAAGATCAAATCCAATCTCGCTCGTCAAATGGATGTAGTCACTAAGGGACG  
TATGACTGACGCCAATTCACAACCTATCCCACGCTTTGCTGAAAGTACGCACACATTTGCTCACTTGTTCA  
ACCGTAAGTCTCGCCTACCGGAATTGCAGGCTGCCAGGTTTCAGCGGCTCCTACGAGGATTGGCCGGATT  
TTTACGCCATGTACAAGACTGTCATTGGCAGCAATGAGGACCTAAGTAAGATTGAGAAATTACAACATTT  
ACGTGCGTGCTTGATGGTGCTGCTCTCAACACAATCAAATCGTTAGAGCCTGTCGACGTGAATCACGAC  
AAGGCGTTGGAGTTACTCATAAAGCGTTTTGATAATAAGTTGCTACATTTTCAGGGCCACGTGCGGGCTAT  
AGTCGGGCTGCCAGGTGTTGAAAAGGGATCAGCAGAGGCGTTGCGTGAGTTGAGTGACAAAATTAACCTCG  
CATCTTCGGGCGCTTAGCACCATGTCAACAACCTGAGGAGCTGGCTGACGGATTACTCATAACACACAATAT  
CGCACAAGCTCGATCACCACACCCAGGAAAAGTGGCAGGAGGCGCTTGCAACGGATAAGCTACCCAGGT  
GGACGGATATGTCGGCGTTCTTAGAGAAGAGATGCCGCATGATGGAAAACCTTGAAAGGCGCTACGGCAC  
CTACGCCTAGCCACCAGGTTACCAGAAATGTACAAAAATTGAATCGTAACACATTCATTGCATCCTCATCT  
AACAAATTACCAGCAAAATTGTAATTTTTGCGACTCAAAAGAGCATTTTCTTGTTAAATGCCCGTTGTTTTT  
GAATCTGTCCCAAGTTTGCGCCACAAGGAGGCCAAGCGATTGCATCTTTGCCTAAACTGCTTGCGCAA  
GGCCATGGCTTGACGAATGTCGCTCAGGTCAGTGCAGGCATTGTCAACAAAAACATCATTCGTTGCTGC  
ACATGAGCCCCATCACAACCTCAATCATC  
>Ref\_dvir\_326  
GTTACCACGGCCCCTAGAGTTTCTTCAATATTTGCCTCTATTTCTATTGCTGCCATCATTATTATAATTATT  
ATTATTATTATATCTCTTACTATTATTTTGGTAATTTCCACGGTATTTTCCGTGGTTATACCATCGGTTAGGT  
CTATATCGTTGTTGCTGCGCAGCATATAGGACAGTATTTGGGTGTCCTACTGCGTCTGTGCAACTATCGAC  
GAACACAGTTGTAATCTCACTCATTGTATTGAAATTTTCGTGATTTTCATTACAGACCTAACTTCGTCAATTGT  
GCTGTTTGCTATGATTGATTTTAGGCTCAGTTCTTCGGCATATTCTTGCGATACACCGTTAATCATATGTGC  
TGATTGCAAAACCCTTGTCAACTGTTCAACTTCTTGAATATATTGACTTGCTGTCTTTTGCTTTTGCTGCAG  
ATTGAACAATTTAGCGGATAATGCTTTAGCTGATTCGCCTTTTATGCCGCTTTTATAGTTTGTCTATTATGGA  
CACTATTGTTTGTTCAGTATTGATTAAGTTTCGAACATGGCCTTTGAGTCTAGTTTTTATTAGGCTGACTGC  
TGTAGTTTCATGTGTTCTTTTATGTAATCCACTAACTAAGAGCATCAATGAACTTTGTAGATTCTCAG  
ACTTTCCACTAAACTCAGGTATGAGTGAAGAGGCTAGCTTAAGAAATTCTACTTGTGCCATGGCCATATTT  
ACAGTTTTTACTTCAGTAATAGACTCTGGTTCAGACTCAGATAGTTTCGGCTAGTGTGATTACCGCTGGTAT

CGTAAGATCGCTTAGATCTTCTTCTTTATATGTTTATCTGAACCGCTTGCGATTTTCAGATTTCGCTTTCTGTC  
TCTAAGTCTGTGTTTGCTTCTTCCTCCTCTAATGCTGGAGTATTCAAAATCGAAGGTATAGTTATGTCTATC  
GAATATTTTAATTTAATGCTATTTAGGTTTGTGTTTAATCTATGCAAAAATCTTGATACATACGACCAATGC  
TGAGTATTTAACTTTTCTTTATTGTGCGTGTATCAGGGAACGAGCTTGGTAAAAACATGCAACTCGTATAGC  
TGCGTGTCTACTTATAGTCTCGTTTGAAATATTCCTATTTTGTGCTAGACACTTGTATGATTTATCAAAATT  
TTTTTTATTTTAATTAATGCGGCATTAATGTTTTGCCATTCCATTTTCATTTTAAAATAAATTATTTAAATGT  
GCAAAGACATATACAAATTTTCAATCAAATAGTTATATATTTTTTAATTAATTTATTTTCAATAACTTTAAGC  
AATCTGTTGTTGATTATTAGTAATTTTATTTTAAATTTTATGCAGATCGTTTGCCTGGCTTTGATATCTCTTT  
TTAATGCATTTATTATGGTACTTATACAATTTATATAATAGATGTACTGGTATTATAATACTTGTATATAA  
AAATTGTAACAATAAGTATGCAAGGGAAAAAATGCGCTCTTGGAAGCGCTGTCGGTTCATTTATTTTTGGC  
CTGACTTGGTGCGTCAGACGGGATCGGTGCTGGCTGCACATGTTGTTAATTCCTTTGATGGGGCGCCAGTGC  
TGGTTGTTACTGCCGTTGCTGCTATCCTTCCATGTCCAGGTCTGTTTTGACCTTAGTCACGGTCGCCATGTA  
ATGGTAAATGTAATCGATTCAAATAGTTCAACACACGGGCACGTCTGTGCCGTTTGACTTTAGTTTTTTGA  
ATGTTTTATTCAATATATTCTTATGGCTAAGACCGCATAGCTGCGCTGCCGTTACGCCAGCAGCGGAGCG  
GCTTCATACATATTTTGTCTTATCAGCATAATCGGGAGAGAGAGAGTCTTATGTACATATTTGCATGTATG  
TATATATGTGCTACGAATGGTCAGCGTGGGACTGCTGACTTAGCGTAGCTCATAAGTGGGCGATCATATTA  
CACGCTCACTTGAAAAGGTTTTGTGTGTACTGCAACAATGTGTTGCTGATATATTTATGCTTAAACGAT  
GTTACTTTTTATTGGTACAGTGTACCCTCCAATATATGCACATACTACACACCTTCCTAATTATTAAAGGA  
AGTTATTTAACTCCAATTTGTTTTAATATTAAATTAATTTTGATATTCGAGGATTTATAATATTGGTAAGGTA  
TTTATAAGGTATTTAGTTTTTTTTTATTTTTTCTAGGCGTACCTGGTATAATTCATTTTTTTCTTGTAGGTCTTT  
TACGAATTAAGATTTTTAACCTATCTTTATGAACTGTTGGTTTTTTACTCTTATTTCTTATTTTCTTATTTA  
TCATTATCTTCTATTTTTTCAACTCTATAGGGCCCAGTGTTTTTTAAAATAGAGCTTATGGCTTACTTCATTTT  
TTAGTACAAATTTATTTCTAGTTTTTAAATCATATAATTCCTTATTTTTTCTATTTATATAATTCGAGCATAT  
TTCTTGCTCTTTTGATGCTACTTCTTATCTATACTTACTTTCTTTAGCCGTAGTCTTATATGTTATATAGGT  
TATCTATTACTTATGCTGTTAACATACTTTGGTCGATTATTAGTCTTACCAAATACTAACATCGACACCGAC  
AAAAATTATGTGCCATAGAGGGGGTAGTATGGAAGCAATAAACAAAATGTAGAGGCCATACGATCGGAA  
TCAGTTTTATGTTACTGGATATCAAGCGCATCGTATATATT

>9\_rnd-3\_family-319\_\_Unknown

CAAAAATCATCGAAAAAAGGTTTCGATTTTTCGCGCCGACCTCGATTTTGAAAAANAANCGTGATGTNAC  
CCCTTGCCATTTNTGGCCGATTTNGGTCAAAANTTTTGATTTTTTTTATTTTTTTGAATGCCAGTNGATAGN  
ACTGATCCTTACGAGTCNAAAATGGTATGAAAATTTGNAAAACCGGACATTATTTGGNNGAGATATTCNA  
AAATAATCATNAGGAAAGGTTGACTTNACGAACNAATCGTTTTTCGGNTCCACAACNTTTTGTAACCCATC  
GATNTTTTTAATTTGTTTGAATGCCAATTGATGGTAGGGATNCGTACAAATTTAAAGAGGTATAACATTTG  
CAAAATCAGACGTTATTTACCCGAGATATTAAAAAAATCATCGAAAAAAGTTTCGATNTTTCGCACCGA  
CCTCGATTTTGAAAAAAAACGTGATGAATGTCGTTTTGGAGCGTCATATCTCCGCGCGGAGCTATTACCCG  
AGATCTTAAAAAATCATCGAAAAAGTTTCGATATTCGCACCGACCTCGATTTTTGAAAAAACGTGATGTT  
TTGGAACGTCATATCTCCGCGCGGAGTTATGTCGTTTTGGAACGTCATATCTCCGCGCGGAGTTATGTCGT  
TTTGGAACGTCATATCTCCGCGCGGAGCTATGTCGTTTTGGAACGTCATATCTCCGCGCGGAGCTATTACC  
GACGTTTCGAAACGACATAACTCCGAAAAGGTTTCGATATTCGCGACGTTCCAAANCATCATTTTTTTTTT  
CAAAATNAAGGTCGGCGCAAAAATCGAATCATTTTCGGGTCCACATCCTCTGTAACCCGTCGTCCTAATGT  
TGAACGCCAATTGCATAAGGGNATGCGTACAAATTTAAAAAGGTATAACGTCGAANATCGGAGCTATTGC  
CCGAGATATTAAAAAAATCATCGAAAAAAGGTTTCGATTTTCGNACCGACCCCGATTTTGAAAAA  
CGTGATGNAACCTTGCCATTTTGCCGATTTGGGTCAAAATTTGGATTTTCTATTTTTGATGCCAGTNGAT  
AGNACTGATCCTTACGAGTCCAAAATGGTATAAAATTTGAAAATCGGACATTATTTGGCCGAGATATTCG  
AAAAATCATAAGGAAAGGTTGACTTAACAAACGAATCATTTTCGGGTCCACGTCTTTTGTAACCCATCGAT  
TATTAATTTGTTTGAATGCCAATTGATAATAGGGATGCGTACGAATTTAAAAAGGTATAATATTGAAAAT  
CAGACTTTATTTACCCGAGATATTAAAAAAATCATCGAAAAGGTTTCGATTTTCGCACCGACCTCGATTTT  
GAAAAAACGTGATGTAACCCCTTGCCATTTNGTCGATTTGGGTCCAAATTTTGACATTATTCACGGAAA  
TTTCAAAAATCATCAAAAAGGTTGATTTTACGAACGAATCGGTTTTGTCGACAACNTTTTNNAANATAANC  
GATGTTTAATTTNTTTGAATGCCAATTTATGGTAGGGATCCGTACGAATTCAAAAAGGTATAACATTTCAA  
AATCAGACGNTATTTACCCGAGATATTAAAAAAATCATCGAAAAAGTTCGATTTTCGCACCGACCTCG  
ATTTTGAAAAAACGTGATGATTTTTGGAAGGTCATATCCGCGCGGAGTTATGTCGTTTTGGAACGTCATA  
TCTCCGCGCGGAGCTATGATATTATAAAAAATCATCGAAAAATTTGATTTTCGCGCCGACCTATTGTTGGCA  
GATAAAAATCATCAGAAAGGTTGACTTNACGAACGAATNGTCGTTTTTGTTCAACATCTTTTTTCAACCCA

TCGATTTTTTAATTTGTTTCGAATGCCAATTGATAATAGGGATCCGTACGANTTTAAAAAGGTATAACATTTNA  
AAATCAGACGTTATTTGCCCGGACTAAAAAAATCATCGAAAAGGTTTCGATTTTCGAACCGACCCCGATT  
TGAAAAAACGTGATGTGACCCCTTGGTCCACTTTGGCCGATTTGGGTCAAATTTAGATTTTCATTGTTTT  
GATGNCAGTGGATAGTACTGATCCTTATGAGTCCAAAATGGTATAAAATTCTNGCACCNANCTAGATTGA  
CTGGNCGGAAGATATTTCAAAAACCGTCAAGGAAAGGTTGACTTAACGAACGAANNNCATTTTCGGGTCN  
ACANCNTTTNCAACCCCATCGATNNTTAATTTTGCCTGAATGCCAATTGATGATAGGGATNCGTTACGCAA  
TTNAAAAAGGTATAACATTTNAAAATCAGACNNTTATTTGCCCNAGGGATTTNAAAAAATCATCGGGAAGG  
TTTCGATTTTTTAACGAANC GGCCNCGGTCTTGNCTAAATGTGTTGCGTGATTGAACCCCTTGTCAATTAGTC  
GATTTGGGTCCAAATTTTGGACATTATCAACGGAAATATTCAAAAATCATCAAAAAGGTTGACTTTACAG  
ACGAATCGGTTTTTGTCTACAACGTTACAAAAAATAAACGATGTTTAATTTGCTTGAATGCCAATTG  
ATGGTAAGGGATCCATTACGCATTCAAAGGGTATAACATTTTAAAATGAGACATTATTTACCCGAGAT  
ATTANATAAANCATCGNAAAGTTTCGATTNTCGCANNGACCTCGATTTNGAAAAACAACGTGATGATTTA  
TGGA

>Ref\_dvir\_508

TTCAACAAATGATTGAGGCCAAGCGGCTGATTAAACGCCACATACAGGCATACCACAACCCGGCTGCTAG  
GCAAGCACACAACAGATTAGCCAACAGCATTAGCAGCGAAATCAAGCAGGCCAAGGCAAGAAGACTTGA  
TGAATTGCTGGAATCTATCGATGCAAGAGATAGATACAGTATGCAAAAGTTATGGCGGCTAACGGGGAAC  
ATCAAAAGGCAGCCTGCACCTAATTTACCAGTGAGGAAGCACACTGAGGGAAGTGGGGCTTCCCAGTGGT  
GCAAGACCACCGAAGAAAAAGCCGAAGCCTTTGCGCAGCACCTTGAACAAAGGTTAAGGCCAATGAACA  
CCACACTGCCCTCTGACAAGAGCCATATCGAGATGCAATTATCGCTACCGCTAGCCCAAGGTGAAGTCAAG  
CTTCCCTACAGTCACGCTAGGGGAAGTACAACTATTATCAAAACATTGCAAAACAAAAAGTCTCCGGGG  
ATTGACCGAATCGATAATCGCACGATCAAGGAAGTCCACAGTCAGCTGTAATGTACCTAATGCATTTTTA  
ACCTTTGGACACTTTCCTTACAAGTGGAATGTGCCAAAATAACAATGATTCAAAAGCCAGGCAAGCCTT  
CTGATCAGCTTGGATCATAACAGACCAATAAGCTTGCTTGCTGGCTTTTCAAAAATCTTTGAACGACTGCTG  
CTGCGCCGGATGTTCCAATTGGAGAACATCATCAATGCAATTCCGAGCCACCAATTCGGTTTTAGACGTG  
AGCATGCTGCTGAACAACAAGTGGGTCGAGTTACGCAGTTTATACTAGAAGCGTATGAAGACAATAAATA  
CTGCTCTGCGGTCTATATGGACATACAGGAGGCGTTTGATCGTGTCTGGCATGACGGACTGCGATTCAAGC  
TCAAAACAACTATTGCCGGAAGTCCTTACCGAGTTATGAACAGCTATCTAAGCGAACGCACATTCAATTGTG  
GACTGCTGTGGAGGTACACGTTCCAGCCTAAAAGAAATCTGCGCCGGCGTTCCGCAGGGTAGTGTCTAG  
GGCCTGTATTGTACACCCTATACACATCCGACATGCCCTACCTGCACCGCTACGTCATAAACTGATGCTG  
GCAACTTATGCAGATGACACGGCCATCTTGTTCATCGGCAAACTCGCAAGAAGATGCCATTGCCAATTTGG  
ATTTGTTTCTTACCACCATAACAACATGGACACAAAAGTGGAGCATTAGCATCAACATTACCAAAACCAA  
GCACATAATGCACACTTGGAGAACTTGCAGATGCCAATTCTTTCCCAAGAATTTTGGATCAACGGCTTA  
CCACAGAAGAAAGGATCTCATACTGGGAGTACAAGTCGATAAAAAGCTTCTTTTGAGCAGCCACGTCAC  
CACCATTGTGCGCCAGGGTTAGAGACAGGGCCAAAAGCTGCACTGGTTAATATCAGAAAGGAGCAAGCT  
GCCATTAAAATGCAAGGTAACACTTTATAAGCAGCTCATAGCCCCAATATGGCAGTTCGCACTTCCGGTCT  
GGGGATCACTTCTATGCGAAGGCCAATTTGAACGTATTCAAGTTGCGCAAAAATAAGATACTGCGAACCAT  
TGCTGGAGCACCTTGGTACGTGCGGAACCAAAGCATCCACACTGATCTGAAGGTCTGTGCCGGTGGAAAAA  
GTGTACCAGGATGCTTGCTCCAGGTACTGGGCTCGGCTCAGCAACCACCAGCAACGAAGAAGCCAAAAAT  
ATTGCCCTAAAGCAAGACTCCCACACGTCACCTAGGTGTGAGAAGAAGATACGCTGAAATGCTTCGGAAA  
CACCTACCTCTGGGTGCGCTAGCACAGCAGCAGCGATCAGCAGGTCCAGCAGCAGGAAGTACCTTCTCAA  
GGGACAGTCAGGTCCGCTCCAACGCCCAACCCAGCCTCAGATACTACCTTGTATTTGACATACAAGAACTG  
CTTGAGTCAAACAATGGTGCAGCCCAACAACCTCCAGGATGAACGAAGCAGCCCGTCTCATATGCAGCTG  
TGCTCAACTCTCGCTGCCCTACAAGGCCAGGAGCCCTCATTCTCCAGTCCAGAGACACCAAGCTCGCA  
TCCAAATCCACAGACGCAGCGGGACGTGGCCACCGGTGCGAATCATGAAGCAGTGTGAACACCATGTGC  
ACACTTGCTACACTATTCATTATGGCAGCCAACCTCTATGTACTAGTACCACAGCGAGGGCCTAAGACTAG  
GACTATTTGCAGGACACGGCAACTCATCCAATTGCGAATGGCTGAAAGGCAGATAAAACAAAGATCGCGT  
TACGCTAACGAACCACTCAGATGGCTCCATACAACTCGTTGTCAAAGGGTTGCCTACTTACAGAAATTTAG  
ACTGCGACATCCCACACAATGGAAAAAGGCCTTGATGCTTCGTTTCTCAAGCACCATACTAATGGCATCT  
GGCGACAGGATCAACAGTGGTCACGCTGGAGACTCCAGCTTATTCAGATGCAACGGCTATCAGACTGGGT  
AGCTTCCAGACAATTGGGAATTTTCCAGTCCTCAAATAATAATTTGACAGCAATCCCCATGCCAAGGCTG  
GGCAACTTCACTTGATTTGTATATAAACACATGCCACTAAATTCAATGTAAAAACTCCGGGGTAATAAAT  
GAAAAAATAAAACACTC

>Ref\_dvir\_786

TATATGAAATATATATATATTCAAACATAACAATTAAATTATCAAATAAGTTAATATTATAATTATTTTACTT  
TTCAGTATCCATTTTAAGTTTCGATTCATACTTAATTATTCTTTGTTATCTTAACATAACTTTAATTTTCGAA  
ATATTTGGGAATAATTTCTTCAGTTTTTTAAAAATGCCTCGCGCGTTTAACAAATCCGCTTATCAAAGGCG  
CCAAGGTGCCATTAATCGTAGTCGTGTCTACTACATTGAGAATACCGAAAGCGTTTGCCTTCGAAGTTCTC  
AAAGTTAAGCTGACTGTCGTGAGTGCAACGGTGATATTCGTGAAGTAGACCGTAATACTGACGCTCTGGC  
CCGATCTAAAAGATGAAGAAGTGGTCGATTTTCGACAGGATGAAAGGGATCTCGATGCAGCAGCTCGCGC  
AACGCAAAGACAGGATGAGGAAATGCGAGCTCTGGAGCAGACACAAAATACAGCGGACCATACTGTTCG  
GCGACAAAATCTGGAGTACCGTACCCTAGAACGTGAGCGCGATGCAGAAGCCACGCTACAAGGAGACA  
GGACTTAGAAATAAGACTGCAAGAGCAGGAATTAACACAGTGGAACACACTGTGCGTCGCCAAAACGT  
GGAGTACCGCGAATCAGAACGCCAGCGAGATGCAGCAGCCACGTTACAAGGCGACAGGATTTAGAAAT  
AAGACTGCAAGAGCAGGAATTGAACACAGTGGAACACACTGTGCGTCGCCAAAACGTGGAGTACCGCGA  
ATCAGAACGCCAGCGAGATGCAGCAGCCACGTTACGACAGGATTTAGAAATAAGACTGCAAGAGCAGG  
AAATGCGTCGACAAATCGTCAATTCCTCTCAAAGACGAGTTACTAGAAACCAGGATCGTACAAGAGAGAA  
CGAATGAAAAAATATGACTGAAGCTTATAAACTTTAGAAATAGTTTTCAAATTCGTGCAATACAGTCAGC  
TCAGCAATCTCAGAGAAATAGAGATGCCAGAGAAGAAATGTCAACTAAACAGCGCGAGCGTAGAGTTTT  
TTCTGCCAGAGATAATACCTGGAAAAAATTAAGAAAGGCCCTACAGAAATATGCATATCATGCGGAGGA  
ACTTGGTTTTCTTTCCAAGTAAAGCTTTTGAATAAAATAAATCTATCGGCCAAAGTTTCCAACATGGATAT  
TTCAAAGCATTTTATCTGTCCAATAAGTTCCCAAGTCTATCTGAAGACTATTTGTTTTGCTCCACTTGTCTG  
CCGACACATATCGTCCGGCAAGATTCCGAGTCTCTGTCTGTCCGAGGGGTTCAACTTTCTGAGATTCCAG  
ACTGTCTTAAAGACTTAACGTGTCTTGAAGAGCGTTTAATTTGCCAAAGAATCCCATTTATGCGGATAATT  
TCTCTTGGCTATGAGCGGCAATGTGCAGTTAGAGGAGCTGTGGTCAACGTACCAATTTCTGTTTCGGAAAC  
TGTGACAGCTCTTCCGCGCACCTTTGAAAACAGTCATGTAGTACAAATTCATTTGAAGCGTAAGCTGGAAT  
ATGCGCATAATTTTCATGACTGAGACAATTAGGCCCGCTCGTGTGCTCGAAGCGTTGCGGTATTTAATAAAC  
ACAGAATTATATCTTAAGCACAATATTTTCAGTTGCTTCCAAGTGGCTAGGTGTAAATGCTCACAATGAAGA  
AGTCCCTTTTGTGCTGATCCAGCTGATATAACAGCTGTGGATAGCCTTCTTCGCTGCCGAATGGAAACAG  
ATTCAGAAGGACACGACACTTCTTATATTAATCCAGGTGGACAGGAACTTTGTTGGATAACGAGTCAAT  
AGAAAACAATGCTATAATTGGTTCGTATTGCAATGGCTCCAGGTGAGGGTCGACGACCAATTGATATGACG  
ACAGATGAGGATGCTGAAGAATTATCGTCCCAACATTTGTAAAAGCAAAAGTACTTATTGTGCGAAAGGC  
CAAATCACAGATTCGGTATTACGATAGTCGTTGCGCGAAAGTACCAAAAATTCGTGTATATGTATAAGTGTT  
ATGAGCTCACACGCATAAAAAGTTCTATTTCTACCTGCCTTCGGAAAAAATCAAGAAACGCCAATATCAC  
CGTTGGTAACTTGAGAGATGAAGGTTTTGTGTCAGCAATCTTGTGCAGCATGATGACGGATATCATGTTCTTA  
AGGGCCTGCGATCTGCTCCAGCACATTGGGAGGCTGAGAAGAAAAAAGTGCTGGCAATGATTCGTCAGTT  
TGGACTACCAACTTTTTTCATAACGCTTTCTGCTGCTGAAACCAAATGGAGTGAGCTGCTGGTCATTCTAT  
CTCTCATTTTGGATAATAGAGTCCTTAGTGAGGAAGAAGCAGCGAATCTTTCAAGTTCCGAAAAAGCTCG  
ACTAATTCGGTCTGATCCTGTGACTTGCTCAAGATATTTTGACTATAGGTTTGGGCAGCTGTTGAAATTATT  
TAAAACAGATATTTTGGAGAATATCAACTCTCTCACTTTTATTGGAGAATTGAATTCCAACATAGGGGAT  
CGCCACATTCAACATGGCATGTATTGGCCAAGCAGCGCTCCTAACTTAATGAGAATAGTTCCCAAAGTA  
GCCGTCAAGTTATAGAAATTATTGACAGATTCATTACAACAAACGGAGATAATCCAAATTTG

>9\_rnd-1\_family-233\_\_LTR\_\_Pao  
AAATTTACTTATTTCTTGGTTTAGGTTCAAAACAGTTGCTAAAAAACATTAGTAACCTCAACATTTGGAGG  
CCCCGGCGAGATTTAACATTGCAGTGCACACAAGCAAAATAAATCTATTGCAAATTAATAATTGTGATTAT  
TCAAGTAGAACATAATCATCGTAAATTGTTATAATTAGGCAAGTGCAAACCGCCTGTGTGAGCTGACCAT  
TTACAGCTCCCAAATATTCGCATATACATAAACGCCGCTAGTTGACTTTTCGCGCTCTTCCCCTTGCGCGGT  
CATTCGCCGGCTCAGCTTATATACATACGCTTGACATAAGCAGCTGCACAATTCGTCGCATGTTGTGTGC  
TCAGTTTGGTGTCTGATTTTGTGCTTGTGAAAAAATGATGCAAGGCGAGAACACAGATGATATGCAGTC  
AAACAGGGTGTCTTTTCTTAAGCGCAAAGCGGTTGCATTGTTTCGAGCGAGCCAAGTGTATTGAAAATGAA  
TTATCTGAGGATAAAATTAACAACCTTGTGCCGTCGACTTAGAAGTGCGCCTTTTGCTAATTGAACAAAC  
TAAGTCTGCCTTTAATACCGCGCATAACTCGCTAGAGGAGCTTAATTTTCGATGAAATTGGCAGCAAACACTAC  
GCGATGATTTTGACGAGTTGATCGCCATGGTTGAAGCTCGCGTTTCGCNAATATTCAGCCGTCGTCAATCTA  
ACGGCCCCGCCCCACCAAACCTTGATCTTAGCCAACAGAACGCGCCTGCCCCGAGCTCAAATTACCAACATT  
TTCCGGTGGTTATACCGAATATTCGGACTTTATCGCGATGTTTGAGTCAGTTGTGACAAAGGATACCGAGC  
TGTCTAACATTGAAAGGTTGCAGCATCTTCGTTTCATGTTTCGTCTGGCCCTGCGTTGGATTTCGGTTCGATCTT  
TGGAGTTTTCCGGTGCCAATTATCCTGTGGCTCTGGATATCCTAAATAGAAGATTTAGTAACAAACGTCTT  
GTTTTCCAGGCACACATCAATGAGATTCTTGGGCTCAAGAGGGTAGATTTCGGAGTCGGCTTCAAACACTGC



GTGAGTTCTCGGACAAGGTCAATTTCGCATATGCGTGCCTTACAGAATTTGGGCAGTTTGGANCNAATTTTCG  
GGATGCATAATAGTCCACGCGCTGCTTCAAAGGTTGGACACCCAGACTCAGACCAAATGGGAGGAGGCC  
GCAGGCATTGACAAAATCCCGACAGCCGATGAGTTCTTCACATTTCTGGAAAGGCGTAGTCAAAGGCTGG  
AGAGCGTGCAACATGCCATGTCATCCCATATAACCAATTATCAGGTGGGCAAATCCAACCATAACACTAA  
CCACAGCAAAAAGAGTGCTTGTAGCTGAGACTAACCAAAAATGGGTGCAGTTTTTGTGATGCGTCTGGTCAC  
GGGATCTACACATGTAGTAAATTCGGAAATTTGTCTCCATCCCTTCGGCATAAGGAAGTCAAGAAACTGG  
CCCTTTGTTATAACTGCCTAAGGAAGGGACACCAAACCTCGGTCTTGCAGTAGTAGTCATTGTCTGACTTGT  
GGAGGAAAGCATCATACACTGTTGCATTTTGCCACTTCAAGAGAAGCTGACGCGCCGACACCATTACATA  
CATCGGCTGATTTGGGCGCCGCCACTTCGACGCACTCTCACTCCACTACGTCTCTTGCTGTCCAAGGTCTTC  
AGTCTGGTGTTGTGCTCCTGGCCACTGCAGTGGTACTGGTAAAGAATAGTTCTGGTTCCTTGTTCCTGTGA  
GGCCTTATTAGACTCAGGCTCGCAGTTGCACATGGTGCATCCCGTTTCGCACAGAGACTTCAGTTAAGG  
AAAACCAGGTCGTCGACAGTTGTCATGGGTCTCGGAGACACAAGCGTCTCTACTGAAGGATCAGCCGTTA  
GGATTAACATGAAGTCACAAGACTCAGATTATTCAGCCACCTTTGATGCTCTTGTGACTCCAACAATTACC  
GATAGTCAGCCCAGCTTCGTCATCGATACATCAGACTGGAAAATTCCTCGAACATAAGGTTGGCTGATC  
CTGCGTTCAACAAACCACAGCGAGTGGATCTCTTAATCGGAGCGAGCCTTTTCTATGAGCTTTTGTCTGTT  
GGGCAAATTTGTGCTTTTGCCAGGACTACCTCTTCTGCAAAAAACTCGTCTTGGCTGGGTCTGACCGGTGG  
ATTTGAGAGACCGCGCAGTACCTCGTTGTTGGCTGCCGGCCGCACTCCTAATAGCGAAGCTAGTCAGTTG  
GACGTCCGTCTGGATGAGTTGGTTCGGCGGTTTTGGGAAATTGAAAGCTTGGAAGAGCCTACAGTAAAGG  
CCACCAAGAAGAGGCGGAATGCGAGCAGCATTTTGCCAATAACTTCTCCCGTTTACCATCCGGCGAGTA  
TTCAGTGCGGTTGCCCTCTGAAGCGGAGTGCAGAGCTTCTAGGAGAGTCTTATGGCCAGGCTCATCTTCGAT  
TTCTCAGTCTTGAGCGAAAATTGGGTTCGGAATTCGCATCTGAAGGAGCAGTATTCGGCAGCACCACAACC  
AAGTTGCGTGTTGTGTTTGATGGCTCAGCAACTACTGATTCTGGACATTCTCTTAATGATGTACTGATGGC  
GGGACCAATCATTCAACCTAAGTTGTTTCACATTCTGAT

>Ref\_dvir\_745

AAAAAAAAAATAGAAATAGATTTACACACCTCTATAAGCACCTCTTGAATTAACAAAAATAAATATCACAAAC  
ATCATTGTTTCATATAATTTTCCAAAATAACTAATTAATTAATAAATTAAATAGTGGCATATTCGCACGTA  
TGCACAGTTATAGTGACAAATATAAGAAGGCAGCATAATTGCAGCTGCGAATCTGCAAGCGCTTATCGCT  
TGCAAAACCATAAAATACAGTTAAGCAAAGCAATAAAACATTATTCAGATAATTGCAGCTGCATCCATACA  
GATAAGCAAAGCAATTAACAATTAACCTTAGATAATTGCAGCTGCACTTGTACAGTTACACAAAGCAATAG  
ACACCTCACTCAGATGATTGCAGCTGCGCGTCTTTACGTAGAAATAAGCTTCTCAACATAAAAATAAGTTCT  
AATGAATTTTACTCTTAAGTTGTTCTTCAATAAATGAACTCGTCGTGAAATATCGCCTTGTCTTTTCATTCAA  
TTTAACCGTTAGAGCTGTGCGCGGTTTTTTATAAGATTCAAACCTCACAGTAAATAAAAAAACAATGCGC  
AGGATCCTGATGCAATAGCTAAGTTATTAATTATTGTTTCCCGTTTACAGTTATCCGCTAAGACAACCAAC  
GCGAAGGCAACCCAAGCGATGGTCAATATCGCGTCAAGTTTTTATCAACCTCGACAGTGACGTGTACACC  
AAAATTCGCTTGTCAAAGCCGCGGAATTCAAGAAGACGCGATAGAATTCGAAGAGAAAAATAATTCCAGA  
AACTTCTGGTTATCTCAAAGATTCTAGTGCTATCTGTGCACAGCAGTGAAGTGATGTTAGCCCTTGGCGT  
AAGCAACTTGATGACCTGGACGGATATTCGGAAGCAACAAATATTGAACTACAAGACGCAAACCAAGAA  
CCACATCCTACTGGAGGAATTCAGGAGCACCCCGTTTAAAGGCAACGTGCGAGCTTTTCTGGAAGAAGCA  
GAACACCGTAGGCAGACACTAATGAGTAAGCTATAAATTGCGAAATTCCCGATTTAAGATGTCTAATTAA  
TATTTTGCAAGAAAAAATCTTTATAACGAACCTGTGTTAATCCAACCCCAAATAAAGTAAACAAGAA  
AAATGTTTAAAGCCATTGTATCAACCACACCCAAATATTCAAAGATTCCCCACTTTCCTTCAACCAAATCA  
ACCCTATGTCCCATATCGACCCCATCAACCTTACATTTAACAACCATATCATCAACCATCACCCAATTATA  
CTAACAACAACACTTTTAAACCTAATAATTGTTACCTCAACCGATGCAACAAATACTTAGTCCAATCAGA  
CCAACCTAATTTACACCCAGACCAAACCTTCCGACAAACCCAATTCGACAACAATCGTTTTCGGACAAGTAA  
CCCCACAACAAAACCTCTTTCAATAACTCTGGCGTAGCCAACCACCGACTAAACGAGTAGACCTGCAAGTG  
GACAGAGTAAGATGAGTATTGACGATGAAGCTAGAAATCAGGAAGAGCTAAACTTTCATGATTACATGCA  
ACAAGAATACTATAATCAATGCGCTGCTTATCCTGAATATTATTACAAATATTATCAAGCAGAAAGTTACC  
CACAAAGTCCAGACTTTACATACACACAATCAGCCGAACACGAGACAGAACAACCAAATGAAATAGAAA  
TCGAGCAAGCCGAAAATTTTCAGCTTCCAGCCTTGGAACCAAACGTACATAGTAATCACTTAAAAAGCC  
AAAAATCTGAAATGTTTAATAGATACAGGATCTACTGTAAATATGATGACATCAAATGTTTTAATTAACCG  
ACTGTTTCATTCAAACCAGCAACGGACCTTTAACTATCACAAAGTAAGTTAACGTCCTTTCTAGTAGAGTA  
ATAATGAATTTCTTCTACACCAATTCTCCTCAGACTATGATCTATTAATTGGTAGAAAAATGCTTTCAGAA  
GCACAAGCCATTATAGATTATAAAACCCAAACTATTACTTTATACAATAAAAGGTATAAACTAACCAACG  
ATATTCCAATCACAAATCAGAGCCACTTCTTAGCCCAACCAAATCCTGAAACTAATCAACAGTTTAAAAA

TCCAATAGAGAAATTCCGATAACCAAGAATCTGCAAACCTCAAGCCTTACCGATTAGATCATTTTAAATGAA  
GAAGAAAGAATCAATTTAATCAGTTTGTGTTGAAACAATATCAACACATACAATATAAAGAAGGCGACCAAC  
TTAGTTTCAGTAATCAAGAAAAACACATTATAAATACTACCCACAATTCAGCCTTACATACAAAACCATA  
CAGTTATCCACAAGCATATGAACAGGAAGTTGAACATCAAATTCAAGACATGCTTAATCAAGGTATCATA  
AGGCCTAGCAATTCTTCTTATTGAAGTCCTATATGGATCGTACAGAAAAAGCAAGATGCTTCAGATAAAC  
AAAAATTCAAAATCGTAATTGACTACAGGAAATTAATGAAGTAAACCATAAGCGATAGGCACCCAATA  
CCAAATATGGACGAGATTTTAGGAAAACCTAGGTAGATGCAATTATTTCACTACAATTGACCTTGCAAAAG  
GATTCCACCAACTTGAAATGCATCCAGATTCTTTCAAAAACAGC

>9\_rnd-5\_family-3379\_\_LTR\_\_Gypsy

TGATTGGTTTTGGTAATGATCGCAACGCGAATAAAACAAAAGCCGATTGGGCAGGTTAATTATACGGTTC  
ACATTGATAAAAAAATGAGTGTTTTGNATTTTTACGTGGTAACGNAAAGTTGTATGGACATTGAACTAAT  
AATTGGAGAAGAAGCTTTTGTATGCGGAAATATCATTTAATCGCAACGGTGTAAGCGTACGAAAAAATTGA  
AGCCGTTTCAAAATTTANGACTGGCCCTAAAGAAGAAAGCGCTATCGAAACCCTGAAAAAATGTTTGACC  
TCTAACCCGGTATTAGCTATATACAATCAAAAATACGAGACCGAAGTACATACTGATGCATCAATAGACG  
GTTTTGGAGCTGTGCTCATGCAAAAGTCACCAGACGATCGACAGTTGCATCCAGTATACTTCATGAGTAA  
GAAAACGACGGACGCACAGCGAAAAATATTCAAGTTATGAGCTTGAGATATTAGCTGTCATCGAAGCGTTA  
AACAAAGTTTCGAGTTTACCTTTTAGGCATCCCATTTAAGTTGATCACAGACTGCAATGCATTTACAAAGAC  
GTTAGAAAAGCAGAATCTGTGCACAAGGGTGGCCGTGGGTGTTGTTTTTACAAGAGTTTAACTATGAAGT  
CGAGCACCGATCCGGTTCACGCATGAAACATGTAGATGCGCTCTCGAGATATCCAATAATGNCAATAAAT  
GATGAAAGCATATCGATTCCGGATAGGGAATGCACAAAAACAAGATGACCAATTGAAATCAATCATAAAA  
ANTATCGATGACGAAAAGAAGAATTATGAAGATTATTTTCATAAAGGCAGGCATTCTTTACTCATGG  
TAGTTAAAAAAAAGTTTGTAAACACCGATGGCCCAAGTAACTCTTCGACTTGTGCAAAGTATCTAAAGCCA  
TGGTCGATTCCGGAAAAATTCGCCAGTCGGCGAATCCGCTAAAACAGAAGACGAAAACGTGCACGATGC  
AAAAGAAGAGCAGCGTGCCGAAAAACGACGAAGACGGGAGTTGGAGTTCCGGCCTTAGACGAGAAAGGTT  
GTGAGAGCTGCTTCCCAAACGAGGAAAGACGACGATTGCTGATCTATNACTTAATCCAACCTATTTGTAA  
CTTTAAACATTACAATAATATTTGTATAACCTTATCCAAAATAAAACCCACACTGCTGATATATATATAG  
AGAAGAGAAATAAATTGAATATGAATACATGCACAGGTATGACCTAGCTTTTTTCCACTGTAAGAAATTG  
TAGAGTATTCTTCGAAAAATACATAGACGAATTGTTAGGACAAATTATTTTACTAAAAAATTATGAAAAA  
AATAAAAAAATAAATTATAAATCTTTAGTATGGAATGGGAGCAACTAACTCTCCATATCCGTGAAATTAA  
AGAAACTTCTGATAAGTTTTACAAATGTGTTGGCCAGAATAGGGTAAGACACGATAAATAAACATGCAAA  
GATTGTTGTGCGATTGCTTTAACGAGGCAGCACCGATGGGTATCAGTTCACGAGGGGGGAGATGGCATGAAA  
GCCTCAGCTAGATTCTCATGATTGACGGATTGCCATCTTCTTTTTCTTGGGATGGATAAAGCTAGCAATGA  
CACTAATTCTGCTCTTTGCTAATTTTTCCAATCAACTTACTCTTCAGTCTGTGCGTAATACTAATTCTTACCCT  
TATACTATTTCTTCCGCTAGTTCTATACCTCCTCCCATTATTTACACACNCCTCTCTCCTATTAGCTATAAACT  
CTTTAAATCTTCTTACTCTCCTTGGNCGGACAATATTCCTAGTTGTCTACTCAAGGAGTGTAGTTCTTCCC  
TTTTATCCATTGCTAAAGCTTTTTTTAAACTTCTGTCTTTCCATCTCTTTGGAAAGAATCTTATATCATTC  
CTCATCACAAGAATGGTGGGAAGTCTGATATACAGAATTACAGGGGCATTCCAAAACCTGTCCGCTATTCC  
TAAATTTTTTAAAAAATAATCACTTCGAATTTGCAGCATTTGTGCAAATCAGTTGTTTCCCCTGTTTAACAT  
GGATTGTAAGAATCGGTCAACTACGACCAATCTGCTTGAGTTTACTTCTTTGGTAAATGATGCTTTCTCT  
TTCGAAAATGCAAACTGATGTCAATTTACTGACTTCAGTAAGGCGTTTGACTCTGTGCACCATGACATTT  
TACTTTTTTAAACTTGACCGAATAGGTTTCCCTCTGTCCCTTTTACTTTGGATTAAATTCTTATTTAAAAGGT  
AGGACCCAAAGAGTAAACTGAGGTTGACTACCTCTAAAAGGGTTCACGTTACTTCTGGTGTTCCCTCAAGG  
TAGTCATCTTGGACCTTTACTCTTTATTTTTNTATAAATGATCTTCCCTCTGTTATATCACATGCCCGTGATC  
TCATGTATGCGGACGATGTCAAACCTTTTTCTATCATACTAACCCCCCACATCATTCTCGTCTACAAGAC  
GATTTGAACGCTATTCCACTTTGGTGTTCCGGCCAATCGATTGCATCTAAATTGTTCAAGGTGTATGTTTATG  
ACATTTAATCGTACTACATCTTATCTTGTGTCAGTTATACAATCGACAATATCC

>160\_rnd-5\_family-2389\_\_LTR\_\_Gypsy

AGTTTGCCTACCTACGCAGAAAAATGACAACAAAAATAAAATATAAATATAAATAAATATAATATATATAA  
TAATATATATATATATTTATATTTATTTAAAAATGTTAGCTGAAATATAAAATTACTCGATTACACTTGGA  
ATTGCACACTTGTGTTTCGATCTACAAGAAAAATGCGTGTCTGCGAATTTTCGACACGGTGAGGTTAGATGA  
CACTTCCGCAAGCCAGACTCGACCTTTCTACCAGTGATTGTCAACCAGAGCAGTCGCATTTAATAATTTTG  
CGTAAAGCTTAGCCTAACCTGCAAGCACGTTTTTGTATANTATTTTTTTTGCTAAATTTAAAAATACAAGG  
CTGTAAGTTTAAATACTACAGAAAAGAAATTCATGCTTAATGGCATTGGTCCACAGAACTCCCATTTGGCTT  
GAGTCCATGCAGGCGGCTATCAATTGGTGCATAGCTGACCGTAGTTTGAAAAAGCAAAGCCTACAGTCGG

ACGGAACAACATTTCCACGTTTTAATTTTGGTGCCAATCCCGAAAGGGTAAATATTTCTCTCCTCTTGCGG  
ACCAGCCGCTCGTTGCTTTTTCGCTGTGTACTTTTTTTCTAATTATCATTTTCTGGTGTACACAGATTGGCA  
CTTATACAGAAACCCCTAAGCTAAGTTTCTCACTCTCTGAAATAATCGAGCAGAATCGGAATTACGGGCA  
CAGGGAGCATGGCAGATCATCGCCACCTGACACAGTAGTGTTTCGGCATGTGTTAAACAAGCACGGATCGA  
CGCACACAAAAAAAAAAAAAAAAAATGTTATAAGTTAGCAAACGAAAGTGCCGCCGTTTGTAATAGTCCG  
AGCCATAACCTGCAGTGAAAAAATATTTTTGATTTAACAAGTTTGCTATGCTCGAATAATTTAATTGAATA  
AGTTATAATAGTTAATTACCGAGCGGCCAACCTGGCGACTAAGAAGTTGCATATTTTTTTTGTGTTTGGTTTA  
TCCGCATAATATCCCTTTTATTTTTTTTTTATTGTTTTTTTTTTCGTTGGGTATAANGTGCTAAAGCGAAAAG  
TTGCCGATTTAACAATAAGTGAAAAGCAAAGTGATTTTTTGTCGGCAAATGAAATATTTTAAACTTTAATT  
CATCTAAAACATGCGTCAGAAAAATAAACCCCTGCCTTTAAACATATTTATAAATACCACTCGTATGGACA  
CCGCCGAAAGTACTTTCGTCGCTGGATCTGCTAAATGGTAAGCTGGAGCACCCCATTATAATTTACAATTG  
TTCTGTTTACCCAGGGTATTACTTGGCAGGTTTACGAGCCAAAATAAGTTTTTTTTTTTTTCAACAGCCAAA  
TGAGCATGCGTACGACAATTTTAAACAGTTGTTGTTGTTTTATCGTCTTGTTGTGCCAAAGCGTGAACCGA  
GCTTATGTGAAACCTGAGTAAACAACGGTAAAAAAAAAATTGATAACAAATTGGCGAGCGTTTGATCAGT  
CGCATGCAATGCATATCAGCTGTGCACCGTACAGTAGTGGCGCTAAATATTANGCACACCTCCGGTAANT  
TTATTAAACAGCTAAAATGGCCTTTAGCCGCATAATATAATCTGCATGGCTTAATCCTACTTTTATTATAA  
CGATACATATTTGCGTCTTTGACATATTTGCATATATAAAATATACATATTAACCCTTANTGTTTTTCAGCAA  
CTTTTCGCTTCGGTATAGTAATAAAATAAATCAACTAGTTTTTGGCCTAGAGTAAGCAAAAGATATGTAAA  
ATTTGGTTAGTGGTAGGGAAGCAACTATAATATAATAAAATATCATTTTTTGGAAATGTTAAGGAATAACCA  
CAACTTAAATGAAAGATCTAATTGACATAAATAAAGAAGTTACCATGAATTCTAACTAAGACCCTTTCCC  
ATTCCGGGATTTATGAAAAGCAGACTTGAGTCAATGTAAACAATATCGAGGGTGTACAAGGGATCGTCTC  
AAACATGTCTTGGCCCTTGGACGATCATGGTAGGGTGGGCATACGCTGCTTCCAATTTCCATCTCTGGGGT  
AGCTATCGTACACTATACATTCATAAATAAGTGCAGACCTACTTTTCTTTTTCTTTTTCTTCTCTTTTCTTTG  
TCTATGATGTCGTTCCAACCGATTGATAGGCGACCTGTTCCCCCAAACAACACGCGAAATTTTAATAATT  
AATAATTTGCAAACGAGCATTGACATCTCGGAATTTTTTTCTGAACCCCCCATCGCCGACGAGATAGAG  
CCGGAAAACCTAGCGCGTGCTCCGTAAGGTGTCTATACTTCTATCAGCTCGACTCTGCAACTATCCTACGTT  
GTATGTTATAGTTATTATTAATTATTTTTGGCCCGCCAATGTGGAGCCCGGTCTGGCAAGAAACCCTGATC  
TTAAATACAATAGAGCAATTTTTTTTCTCAGTCGATAACATCTGNCTNTACTCAATCAGTTGGAACATGGT  
TCCATTTCCCTTGTCCTNGTTTATTGTTGAAAGGCTATGGATTACCCAGNATTTCTAAATAGCTCAGGTCCG  
AGCTACAAAACAACAATAAGCCCATGAATTGTTTAA

>Ref\_dvir\_693

GTTGTTAAGAAAAAACTTGTTTAAAGTGGAATTATTTAAATGGTGGCCCGGTAAGTTATTTTCGGGAGC  
ATAACGGGAATGGAATCTTTGCGTGAATTTTGGACAATTAGTATTAAGCGATTGAAATGAATCGTTTATCG  
TGAATGATTTTGTATTTTTTGGCGATGAATCTATCCTATCTTAAAGATCCACTATTAGCCGAGGAATCTATT  
TTAATTATTAATGGACGTAATTCAATATTTTAAGTAAATATTTTGTATTCAATATAGTAGCACTAGGAGCA  
GTGCCATATACATATTTAAGAACATTTATTTTGGCTTAACTTTCAGACCTTTAAGGATATGGCATAGTGTAT  
ACCTCCACTTCAGTTGCAGTTAATTGGCATTGCTATGATCATTCGGATGTGTCTCTATTGCATCTTATATT  
TTAATACAATCATTTTTTATATAACGTTAAGCAGCATGAATGTTGTTAAAAAATGTATCTCTGTACTGATCA  
TGATAAGGATTAAATTTATATATATAAAAAAAAAAATGTATTTATACTTTTCATTACCTTTGTTAGAAATATA  
TAAATATAAGACGAGCACAAGACAGTTGAAACGAACACAACTAGCTGGAATAAACACGAATCAGTTAA  
CAAAATAAAATTTGAGTAACATCAAGTATATAAAAAATAGCCTTAGTAAATAAATAAAAAAATTAACAAA  
AACGGTTTAAATACGTCAGGAGGCATATAGCTTGCAAGAGAACGTCACCTTGCACTTTTATGCATAGAGCC  
GGTTTTAGAGCGACCTTGCTTAAGCAAGTCAGGAGTTCCTTTCTTATGATCGCCGCCTATGCAATTATTTAT  
ATGACTGCGTATTGCACCTTTTGGGGAAAAAATCCAGAACATCCCTTGCAACATATGACAACATATTCGTTT  
TTAGAGTTAATTAGCTTTAAAATTTTCGTTATTTAACGATGCATCGATATTGTCGATTTAATCGCCATTACTC  
CAAATCTCATTAATAACTACTTTTCGAGTTTTGTCATTTTTTCGAGGCATTAACACTTTTTTACTTGTGGCTT  
ATTATTTGGAAGTGACGAAGAATCAAATCCCTTATATCACTTAGTGGAGTTACATTGTGTAAGTTAACTT  
GGAAGTATATAAGTGCTGGACTGATTAGTTATATCCGGAGTATAGTTGGAATCGACTCCTTGAATAGAAT  
GTGGAAAATTACCAAACGATTTAAATGTATAAAATGCTTATGCTGGGGAATCTAGCCATTTAGAGGCCAG  
TCTTTGTCTATTATGACGGGCAAAAGACACCTGAAACGAACACAAAATAGCTGGTACTAGCACAAATTAG  
GTAACAATCCAAAAGGCGAGTATTATCAGTATACAATGTTAGCTTTAGTTAAAATACAAATTAGCAAAAA  
CTGTTTGAATACTAAAAAAGGTTTGTACGTCCGGAGGCATATAGCGGACAAGAGAATACACTATTCCTAG  
AAAAGTAATGACCGATTGTGTCTTTTGTGTAGCTTTTTATAATAAATTGATCTGATTTTGCATATATGATTA  
ACTCATAATACAAATGATAATTAATTGTTTTCAACAATAAAGGCTATAAATCTTTTGATATTTTCCG

ACTCTGGCCTTAAAACTGTGGTACTCACAATTATGCATATTTAAAACTTAACATATAATAATAAATACATT  
ACAAAACATAACTCTGTCAGAAAGTGTAATGCAAATGATTTTTTATTTAGTCCTGGCTTAGTTTTAATAATT  
GCACACATAACCGAAAGCTTCAAATTGTCCCAGGTTGCTTTTATTTGTTGTGTGTCAGTATTTGACTTATAAGCT  
GCTAATGGCGCCTCTTTTAAAGACAATGCTCATTAATTTATTTCAAAGGCACATTAGTATTGTACTTACG  
GATTTATCATCGTTTCGTTGTTGCTTCACTTTCATTTAACTTAGTATCTGCTTCTAGTAAGTCTATAAAATATTT  
AATGTATTATTAATTATAATTTAAATTAACAAACGATTATTGCATTGCCTATGTACATATGTATAGTTATTG  
ATTTATGTACATACCCTTATTAAGTTATTGACATTGCTGGTCCAGTATTTACGATCTTCTAATGAAATAAA  
AGTACATATACAGACAAATATAATTATTGAAATGTCAAGCTCAACTTACCTCGCGAATCAATAATCTCCGC  
TTCGAAACTGCCTTTGCTAAATTTTGAATGCACATTTTACTTCCTTCCACTATTTTAATTTTTTTTTATGCA  
ATACATAATATTGCTCGCACTTAATTAAGAAATACATCCTCTCGCAGTTTCCAGAAATTTAATGGCGCCAA  
GTTTTTCGAGATACGCGACGAGCAAGTCAAGTCATTTCTTCAAATGTACTTTTAAGGCAGCTCAGCACTATC  
AAATTGAATACTCGAAACGCGTTTCAATTTGCTTGCCTTATGGTAAAAACTAGTCGATATTTATGCAATTAA  
AATGAAGATGTGAGAGAGATATTAAATTGATGATGGATTGTAAAAATGAAAGCGGTCAAATAGAATAAC  
TGTTAAGAAGAAATAACTGTTTTTAATTGGA

>9\_rnd-5\_family-2852\_\_LINE\_\_I-Jockey  
CAGTCGCGATCGAACACTCGTTGAGTAGAGACGTGCCTGCGGACCGCTGCGAAGCATTCCAAATACACAA  
GCAACATAAACAACAGTTANTTGCGGCGAAATTNTCAGGCCAGCTGCGCTCTGATTGGTCGCTGCAACCG  
TACTGCGCTCTTTCAGCTTGCGTGCCGTGCGCAAATAACGGCGCACTAATACTTACACACGCACACGCTT  
ACACGCTTGTGCGCGTTATTTTCGACACACACACGACAACAAGAATACAACAACAACAACACAGACT  
AGCACTCGCTGCTTACGCTCGCCAGACGGGCAGCTTGTGCTCNCGCCCCCGTACCCGTCACCAACAAG  
ATGGACAAGATGGACTGGCAAGCCGAGCCACGTGCTATACAGCTCATTAAACTAGCAGCACCAAGAGG  
AAGAAGACCAACATCAGAGCTAGCAACCCTGACTCTGAGAATTCGAGTTGCACTAGCGAACCTGGAGAA  
ATAAGGAGGAAGCCCGTGCGCAAACAGCGCAAACAGCCTTCCCGCGTACACCTACCAGACGGACCAAGC  
ACCAGCAAAGCTGCTAGAGAAAATCTAACAAGTAACAGATTTGCTTCACTCTCTACAGATGAAGACGACG  
AAGAATCTTCGGCCAGCGATGACTCCACTGAAGTCATAGGACTAGCTAAGGGCCAACCAATAAGGAGC  
CTGCTAAAGAACCTAAGACGATCAGGCCACCACCGATTTTTATTCCAGACGTGACCAATATCAAAGCGCT  
TACCAATGCCATAACTGGCGCCCTTGCCAAAGCAGTAGAAGTTACATATAAAGCCACTAAAAACAACAAC  
ATTAGAGTAATGACGCCAGATAAAGCTAGCTTCACTGCCTTAAGGCATTTCTCAATGAAAATAACAAC  
GGTATCAGACCTTTCAGCCCAGAGACGAAAGAGCCTACCGGATAGTGGTCAAAGGCCTGCACCACTCTAC  
TGAGCTGGTTCGAGATCAAGGAAGGTTTAAGCAACTACGGGCACGAAGTAAGAGACCTGTATAACCTCAC  
ACAAAAAAGCACAAAAAAACCCCTAAACATATTCTTCGTAAATCTCGAGCCGGCGAAAAAAATAACAAA  
GAGGCATACAAAATCAAAAGGCTTTGCTGCTCTGTGGTTACAGTCGAGCCCCCACTGAAGTTTAACGATG  
TCCCCCAATGCTATCGCTGCCAAGGATACGGACACACTCAAAGATACTGTACCTGGAACATAGATGTGT  
GAAATGTGGAGGCGGACACTCCACGTCGGAATGCTCAAAGAAGAGCAGTGACCCGGCCTTCTGCCTGCAC  
TGCCAGGGTCCCCATGTGGCCTCATACAAAGGATGCCCAGCCTATAAGAAGGCAAAGAGCCTCTTAACGG  
CAAACAGACAGACAGCTCCAAGAGATGGACTGCCCTAAACTCCAGCAAAGTGAATGCAAACATTAGTTT  
TGCTAAGGCTGCAAAGAGCACCTACGAGGCAAATCAAGCTCCCTGCCCCGATTACAGCCGGACAATCAA  
CTTAATGCGATAGTGACAAGGCTAGAGGTCATGTTTGAAAAAATGATGGATAAAATACTAGGTCAAATGA  
CACAGATGCTGGAACTGTTTGCTCCACATTATGCAAGAAGGTTTAGAGATCACGATCTGGAATGCTAAC  
GGCCTGTGCAAAAAACAGGCCTGAGGTTGAGCTTTACTGCAAGACCAACAATAACCGAAATTCTCCTCATAT  
CTGAAACCCATTTCTCTGAAAGATCTTACTTCTGCCTGCGAGGCTACGACCCGATCTCAGCCAATCACCCC  
AACGGGAGAGCCCCGCGCGGAGCTGCCATTCTAATTCGTAGCAACATAAGTTACGAGATCCTCCGGAGGA  
GTGGATCCAATGCGCAAAAATAAGAGTGAGTACCACGCTGGGAGACGTCACAATAGCCGCTGCCTACTGC  
CCCCTGCGCTAAGCACAAATGCTAGGGACGAAGAATTCGGGACGCTAATGAACAGCCTAGGCACAAGGTTT  
CTAATAAGCGGAGACTTCAACGCCAAGCACACCTGGTGGGGATCCAGAACAACAACCCTAAAGGCTAC  
GCGCTGTTTCAGGCAAACCCGGTTAAGAAACCTCGACTGCCACAGTACAGGCGCACCTACATACTGGCCTA  
CAGACCCATATATAGCGGTGCCAGCTACGTCCTGGACATCGCGATAACTCGTGGTTTGAATACTGGCAGA  
ATCAAAGTCAGAGAAGTAGAGGACCTCCTATCTGATCACAGCGCCATAGCCATCTCTATATTTGCTGCAG  
CCATGCGGAAGTCTGCCCCGAAGAAGCTTATATATAAAGCCACTGATATTGGCAAATATCAAACCTGGCT  
GGACAACCTGCACCAATCCCAGCCCCCACTGAATAGCCCGGAGGACATCGAAGCGGCAGTCACAGAGCT  
AACAACTCATATCCACAATGCGGCGTCACATGCGGCTCCAAGACTCTNAAGCCGGCCAGAGTTGAAGTA  
ACGGAGACGTTACCTCTGGTCACAACAAGTGGCCGAGCTGC

>9\_rnd-1\_family-486\_\_DNA\_\_Maverick  
TAATATACGGTAAATCTTGGTTAACC GCAATCCATTATGAATACATTGTTGAAGATTTCTATAATGTATGG

GATATTTATATTTTCGGTCTTAGGTCAGCGATAAGCTTTTTAACTGTACACTTTGTCAGTCGGTTTTGATTGCT  
TGGACGAAACGGCAAGTCGTTATGCATATCGTGAAGGGATGCTGGGTATTCTAAATCTACTTCAAGAATA  
TATCCATATTCATACGTTTCAGAAATTGAAAAAAATGAAATNATCGTATTTTCATCCTCACTTAACCACTGG  
AAATCACCATATGGAAGATATTGTGACATCGCCCAACCATATAGATTATTTGAATCCAAATACATTAAATA  
TTGAGAGGGTTTTGTGCTATCATAATCATTCGTATACTTATGATTAGCAATTGAATATCTCTGACAACATT  
GTACTAATCCCCACGAATACCATTTTTGTATAAATCTTTGCATATCTATGTCTGTAAATAATTCTAATTCTAT  
TCCAGTTGTTTTTAGCATANCATCCCAAGATAACCCCGGNGCTGTGTAATAATGGGCTGGGTCCAATGAAT  
AAATATTAACGAAAATTTTCGAAAACATCTGCAAGCAAANGTACATCTGTCTTTAAATACAGCTCCATA  
TAAATCTTTGAGGGTTTTACAATTA AAAA ACTCTCCACACGTTCTGAGCGTGTAATAATCATCATCTAAAC  
ATTCTCTATTTGCAAGACTGTTGAAAAATTTTTCCCTTGGTGGAAGAGCAGTTTCTTGCAAACATTCAAAT  
TTAGTAAAGTANTCATATGGGAAAACCTCCCTTCCTATGTACTAGATTAAAGTGTGTTTCGTCCGGGAAAAC  
CCGTTTAACAGTTNTGAAATTATTATGTTCTAAATTAGAGCTAAGACTATCTAAACTTGCAGCCATAAATC  
GAAATGAGTCTAAAAAACGTATTTCCAAATTTGTATTATGCTCTGTAATATATGTGTATTTTGAAAGGGAA  
ATGTAAATCTCTTTATTGAGAGGTAGAACCTTAATTTACCTTCAACTTTTGACAACCTTTACAAACAAAT  
GAGCATCATAGCGTGAAAAATTATTA AAAA AGTACGGGGATAAATGAGGCAACTTTGTAATTTATGTTAC  
AGGCATTATGAGCTGCCCCCTCTAAATTTACCAGTTAAGTGGCAATGATCCCGTACTCTATCTAAGTTTAAA  
ATCTTAGTGCAAATGTGGCAATTTATAGCATTTTTTAAATTTATGCTCATCTTCTAAGCTCATTTTCGATTGGC  
TTTACAGTAGATAAATATTTGCTATAAATCTCTCTTGCATCNGCAATGAGAGATGTTACAAGATGTAATCN  
TACATTTTCTCCACTATATATAACGAATTTATCTAAACTAGAATCATATGCAGATTTTATGAAATATGCGT  
ATGCAACAGGAATGTGTTCTTGAATGCTCATTACATTCTCGCTCACATTCCTGTTGATAGGTTTTAAACG  
CACTCGAAATCTGCATAGATTATAAAAGGTATATCTAAACTATTTGCATAANTCTTAAATTTTACACTCGC  
CTTATCCGCTGTTGGAAGCTTCGCCGCCACTTTTCCCACTGCTCGCCATGCATCCTGTCGTTATGCGAATA  
GCTTAAGCATAACATTACAGAAATGTAATTTCTCGTATGCGAAGTCAACTGATTGTGTGTAAGCCTGGAGG  
AGAAAATATGATTGATATTA AAAA AGAAATGTATATTTTTTTGTATTCTTTACTTACCCTTGATAGGTTCTT  
AATCCAGGTATAATGGGATATATCTTGCTCTTCCAAAAGCAATAGATTAATATGTTTCCCCGGTGCTCTTT  
GGTTAGATAGAGTGGTCCAATAATTTCAATTAATGTCTTCATCATAGCCAAAGACATTTTATACTCAAGTAA  
GTATTTTGTTGCTCAAACAATTTAATGTCTTTGAGCTTTAATGGAAATTCATATTAGATCTTTCTCTTGGA  
ATTCATCTATCTTTGAACTTATGATGTATGAGTGGCTTACAANTATTTCTTCTAAGTCAGAAGACTTAGTA  
GCCACACACATTTCAAGTTTGATGGGATTTAATCATTATTTCAAAATCTTCGCCNTCAGTATTCTTATTATT  
ATTTTCAAAATTCAGCGAAAAGTTCAAAGCTGATTTTATACGAGGTGTGCACCTCTAAGACGTTTTTCGATT  
GTTGGAAGTAATAAGCTTCCTGCTTCCGATAGAACTTTTCAGGGAACATAATGTTATCCGAAACATTGCT  
AAATAANCAGGGTGTTAGTCCTGTTTTGGAATCCGAATGCCGCAAGTTGAACAGAGCCATCCAACGGTGT  
GAAGGCCTTATTTTGCTTATTTGTCCGCAAATGTTGTGCCAGTGATTATGAGCCACCGTTACTCCACA  
AACCTTTTCACTTTAAACTTTTCAGATAACTAAATAAATTTTATTTAAAAANAATACTCACTTCACTTCAGT  
TTCCCCCAGCCACAGCTCGCTGATAACATAGCACATAGCACACACATACACACACACACAC  
>160\_rnd-1\_family-298\_\_Unknown  
CATTGAGTAATAAAGAGAAAGAGCAGGCGTTTTGGATCAAAAGCTCTTTTTAGAAATACTTCCTGAGCGAA  
AACGAGGTTGCAAACAAAAATTGCAAACACAACACCCGGCTGTCTGCAGCTACTTCTGCCGATGCCACA  
ATTCAATGGCAACTTCAAAACATTTTCATAAAGAACCAACAACAACCATAAATCAAAGCAAACGACTCGAC  
AGTGAAAAAAGCATAACCACAAATTCTGTCTTGCTATCCCTTTTTGTTTGAGGCTACAGTCTATGATCTTA  
GCTTCTGCACCTTCCAACCTCATTGTTGTGGTTTCTAAGCACTGCTATGCCTATAATTCGCAAAGTCATGTC  
TTCTTCTTCTTCACTCGCTTTCAACTTGCAAGCAGATCGGCAGATTTTTATAATTTTTTCATTTTTTCGACCAGC  
AAGGCACCTTTTCTCAAAATAGGGTATTTTAACTATTCATAAGCAATGTAACCAAATAGCACAAACCATCT  
TATATATACATTTTTATTTAATGTCTATAAAAAATATAATTTTGTATTTAGTGTGCAACTATTAGTACAGTC  
AATAATAATTGTTTTCTTTATAAATTATATACCATTCTTATAAAAAAGAGTATCAATGCCGCGNCCCGCCA  
AATAGTTGTTTATGTGTGTCTCATCTCACACATATTGGTGCAAATCTGCATATATGTATGTGTCTGCCAAGC  
CAAGGGAAGTCTATGAATTTAAGAAGATTGCAACGTTCTGTTGCGCATGTGACGTCACAGTCCAAGGCTT  
TTTATGTGCGATCATTTTCGTATATAAAATTATTACATATGTCAACAAATTATTTNCTATAAAAGACCCCAT  
AATAAGNTATTTAAATGTACCTAATAAAGGTAGAAATATATGCTAAACATCACAAGAAATAAAATTCTAT  
TAACTGTGACGTCATAATATATGATGTTGGGCGCCGTGCGCGTAACCCCTTTGATCTGAGTGCCGTGGCTTG  
CTGATATTCAAATTTTCTACCTACTTGCGCCGAGACTCGGCTCTACAACAACAACATTAGTACCCGAATTG  
TGCTGTTGTTGTTTCTACGCGCTGCCTTGTAGGAACGACAGAGAAACCCGCAAAGAACACTGTGGCATTNT  
TTGCCCTTTTCTTTGCACTGAGTTTCCTATGTCCTCATTATGGCTCACAAACCTCTTGTCGATCAAAACGGG  
GGATGAAGAACAAATTGGGTTTTCGTGCGCACTGTTGTTGTTTTGCAAGTGATTTGTTGTTGCTTCCTATGGT

AAATGAGCTTTTTTATTGGGTGTGATTTTTCGCTTTGCGGACCAACTCGATCTACGACTCGTGGTTTTTAAAA  
CGGTAAAAAAGCTCAGAGCGTCAGTTCAGATCTTTCTCTTTATTACTCAATGACTAAAACTATATACATA  
AGATAAGCAACATATATACATACATATACAGCATATAATTACATATCTACAACATAATACCGTTTTATGTCT  
AACTTAGGAAGGGTTAGGAGAATAATTCCTACAAGAGGTGCCAAACACACTAGTAGCATCCCAGATATTA  
GAGAAGAAGAAGCATCCGAAACCATGTACATGGCTCAGGTAATACCCCCGGCACAACCTGCCAACTTGCA  
CATGTAAAAAATAATAGGTAGCTTTAAAATTGTCGATTTATTTAAAAACCTTCCCAACATACGACGGGAA  
CATGGAAGGACTAAGGGAATATATTACAAAAGTTGAGTAGATATTAATGCTAATAAAAAGGGGCAGCCCA  
AACTCCAACCGGACTAATGATACTAAGGGCAATCAGAAACAAGATTCAGGGAAAAGCGCATGAAGTACT  
ATACCAATCGGGAACTGAGTTGAACTGGGACGAAATAAAGAATAAACTTATTACCCACTTCGCGGACATG  
AGAACCGAACATAGCCTTATGGCAGACCTAGGCATCCTTTCACTTCAATGTTACCCAGTAGGAATTCTGTA  
CGAAAAGATAACAGATATTCAAAGAGCTCTACTCAATATCGTAAAAGAAAAATAAGTGAATCAAACGGT  
CATTGAAACCAAAAAGAGAACTTTTCAACAAACAATGTTTTACAACATTTCTAAATGGACAAATCTGACTTT  
CTACAAAAAGAAATTGAATACCTCGGACACATTGTAACACTAGATGGCGTTAAACCAAAACCCGTCAAAGA  
TGGAAGCTATAAAAAAATGTCCTTTACCGAAATCTTAAAAAGAAATTAAATCCTTCTTGGGTTTAATGGGT  
TATTACAGGAAGTTTATGAAAGACTTCCCAAATATAACCCCTGACTAAACAATTAAAAGGGGAAAACGATT  
GTTGTTTTTAAACGATGAATTTATAGAAACATCTAACTACTGTAAAACCTTGCTTTGTAAACGACCAATTACT  
AATTTACCCCGACTTTACGAAACCATTCATACTAACAACAGATGCTAGCAACGTAGCGTTATGAGCTGTGT  
TATCACAAGGACCTTTAGGGTCTGATAAGCCAATTTTGTTCGCACGCCGAACACTA

>160\_rnd-5\_family-148\_\_LINE\_\_I

ATATCAACAAATTAGTAGGGATTTTCCCAGGGGCCTTTTAAATCCATCAGAGACAACAATGTAGAGCTCCA  
AAATTCAGTAGACATTGGCAATGCATTTGGAGCTATGTGGTCCAATTATTCCAGGGATGAAAACCTTCTCAA  
ATGCGTATAAAGTTAATAAGGAAAACGTTCTCTCTCAGGCATATCTGCCCAACCACATATCCTCAAATTCT  
AAGTACCTTGAATCTCAGTTCACACTGATGGAAGTAGAATTAGCCCTTCAACACGCTAAAGGGGAAAACCTC  
CTGGGTATGACCGCATCTCGTACAATATGCTTCGAAACTTACCAATAGAGGGGAAAGAAAAGAATACTAGA  
AATGTACAACATAATGTTAGATGGGGGTAACTATCCGCACGCTTGGAACCGGCTACAATTATCCCAATC  
CTTAAGCCAAACAAACCTTCCCACGAATTATCATCCTTTGCCCCATATCCCTACTCTCCTGCTTGAGCAA  
AACACTGGAAAAAATTCTTGCCAAAAGGATCATGTGGTTCATATCCAAAAATAAACTTATCAGCCCCAAC  
CAAAGTGCATTCAAACAACAGCACAGTACCATTGACTCCCTATTGCATATCCATCATTACGCGTCAGATGC  
CCTTTCAACCAGAAATCATGTAACCATCCTGGCTACTGATTTTCGAAAGGGCATTGAGCGCGTTGGAGTGC  
ACACAGTACTGGAGCAACTTTCCCGGTGGGGGGTGGTTCCTAAGACCTTCAACCTCGTGAAGGCTTTCATG  
ACCAAGCGATCCATCCGTGTTAGAGTTAATAACACCTTATCTAAGTTCTATAAATTACACATCGGCATACC  
ACAAGGGTCTCCACTCTCGGTGGTTTTGTTTCATGATTGCCTTCAACTCCCTCAATAACATAATACTAAAAC  
ATAAGAAAATACAACCTCTCCGCGTACGCGGACGATCATTATCTTTAGTAACTGCAAAAATACAAATTTAC  
TCTTCCTTACGTTTAAACAAATACTTAATGATATCGTAGAATGGGGAAAACCTCTCAGGAGCCACTCTTGCT  
TTAAACAAAAAATTGTTCTCCCCCGCATACCATGCAGCAGTACGGCGTAGCATTGACGCCTTTCTCACTACT  
CCGACGGAATGCCTTTTAGCTGAAGCGGGTCTTCTGAAATACAGACGAGAACTGCGCAACTGACTTTCA  
AACTCATCCCTAAAATTCTTTGCTCGACCAACCCAAATCTGCTTAAAGACTTTAACAGAACGGTTAAGCAG  
CGCCGAAGATTTAAAGTCTTGTCTACTATCCGTAGATGTTGCAGTTTTTTCAAAAAACATCAATTGGATAT  
GCCATATCGTTGGAACAAAATCAGCCCATCCCTCCTTGGAACACTACAGGACCACACCGTGAACACCTCT  
CTCCACTTATAAAAAAAAATCAGAAACACCTAAAAGTATATTTTCAGCAAATGCTAGCGCCGAATCGGAAA  
AATTCCCCAACTGGAGTTGGCTCTACAGTGACGGATCGAAAACAATTGACTCCACTAGCTTCGCAGTTGTA  
AGCCAATCAGGAACTGTGGTCGCATCAGGAGTGCTCCCTGCATACTTTTCTATATATTCCGCCGAAGCTGT  
AGCTGTTCTAAAAGCAATTAAACATGCTCTCGAGCTTAAGGGAAAATTTATAATATGCAGCGACAGTCTTT  
CTACTCTCAACGCCATTAACAACACATACAACCAAAACAGCCTGATATGCGAAATTTCGACATCTTTGCATC  
AAACACGATACCAAAATAAAACTCCTTTGGGCGCCAGGTCACATGGGCATAAAAGGTAACGAACCTGGCA  
GATGCAGCGGCTAAACTGGCTGGACAGTCTCCTTGCCCTAACAGTCATCCCTGGTGTGAGAGAAGACTTAA  
TGCGCAACATTGAGGATATCCTAAAAAGGGACGAAATGACACAATGGGACACTTACGTCCATAGATTTA  
AGCAATTTAATCCGAACAAGGAACCCGTCCGATATCCAGCTTCATGGCACAGAAGACATTGCAGTGTTAT  
CACCCGGCTCAGAACTGGGCACACCGCCTTAACCCACGACCACCTGCTTAAAGGAAAAGCCAANCCCCAAC  
TGCCCAAAATGCGGGGGGAGAATTATCAATCCAACACATATTGAATAACTGCCCACTTAATAACATTA  
GGACTTGTCTATTTGGCCAAATCCAACCTACCTCTCTTCTTACCACACCTACTCACAATAATGTAAAATTG  
CTAATCAAATTCCTAGACACCAATAACATACTAAATAGCATATAATAATATATATATAATTCAANATAATA  
TACATATAATACTATAAATAATTTAACTGTGAGTCGATGGCCTTAGTAGCTAGCACTCCCTTCGGTTAGT  
TATTATATTATTTTTTTTGTATAATAATTAATTACGTAAACCAATAAATATTTTATTGCCTATTAATTTTCGT

ACTTGGGCTTGAATGTCTTGTACTTGGCTATGAGGACTCATATAATTTTT  
>160\_rnd-4\_family-254\_\_RC\_\_Helitron  
TTATTGTTGTTGCTTTCGACAGCGTCGGTTTTACTAGCGCCGTTTGTATCGGTGTATCTGCATGCTCTATTG  
TTGTTTTTATACCTGAACCCATTAAAATGGGTAAAAAGGGTATATTGTATTTGTGCAAAATGTATGTAAN  
AGGCAGAAGGAAGCATCTCCGACCCCATAAAGTATATATATTCNTGATCAGCATCAATAGCCGAGNCGAT  
CTAGCCATGTCCGTCTGTCCGTCCGTCCGTCTGTCTCAGAACCTATAAAGAGCTAGAGACCTGAAATTTTGA  
GATGTAGGTCCTCCTAGTGCCTGCGNAGATCNAGTTTGTTCGATAATCGATAACTTACTCNGTTNCCAA  
NCAATCGATAAAAAATCGGTATCGACATCCTNNTTTTTTTNGNNAANTTNGGTAAATAATAAGANCTGGAGT  
CACCAAACNTNATNTGTTGNTTCTAGAATATTATAAATATGTATCGAGTATATTTTCATTTTATACCTATCGC  
CACCTCCCCGCTANCACNGCANAGCTATAAATNAAGTTAAAAACCCGACTTNTATCGCCAACCAATCTAA  
GCCACAATTTTAATGCTATTGACTTNTTATAAGCACACAAATATTCTATGGCACAATAAGATATACTGTAG  
AAAATTTTCAATTAAGATCGGTTAANAAAAGGCCAAAGTTATATGCAACTGCGCAATTGAATAGAGCAGCAT  
CTTTAAGAATTTCTGTATACATGTACANACANACATTCATGCGCGTCTGCTTNGCATTCTAGCAGCATNGT  
NATTGCGACTNTTTTCTGTAATGCTATTTTAGTCCCTTTTTNTACCCTGAATAATACTTAATTATTGGNGTG  
GCTGTTGAGTAGGGGCTGTGGCAAGNGNNGCGGCCTNTCGCGNGTTCGAGCNCCACCTGGNNAACTTTTC  
TTTTTTTTTATACCTGAACCCATTNAAAATGGGTACAAGAGCATATTGCAGNTGCGCGAAATATTATGCAA  
CAGGCAGAANGAAGCATCTCCGANCCCATAGNGTATATATATTCTCGATCGGCATTAANAACCGAGTCGA  
TCTAGNCANGTCTNTCCGTCCGTCCGTATGAATGAACGCAAGGATCTCAGAACCTATAAAGAGCTTGAAAG  
TTTCGATGAAGGTGCTCCTAGTTCCCGCGCAGANCTAGANTANTTCCGATNATCGATAACCTACCCCGTTN  
CCGAGCAGTCGANAGGAATCGATANCGGCANCTGTTTNTTGGGCATATATTTAAGCCTTTAAGCCAGAG  
NTACCAAANTNGGCACGATANCTCTCNNAAGGAATATATATGCGTTTGACGTTGGAGGAAGGCGGTTT  
AGGGTATCCGCTAGTCGGGCGCCNCCGACTAGAACTTCTTACTTGTTTTGATATGTTTCGCTGTNNAGTAC  
AGCCGTCAGCAAGTAATACAGGTCACTTTACAACGTNGAGCCTTGCCAAGGGAAGTTCCTTTTTTATACCT  
GAACCCATTAAAAATGGGTATAAGGGTATATTGTATTTGTGCAAAATCCAAATGTATGTAACAGGCAGAA  
GGAAGCATCTCCGACCCCATAAAGTATATATATTCTTGATCAGCACCAATAGCCGAGTCGATCTAGCCAT  
GTCCGTCTGTCTGTCCGTCCGTCCGTCCGTATGTATGAACGCAAGGATCTCAGAACCTATAAAGAGCTAGAG  
ACTTGAAATTTTAGATGTAGGTGCTCCTAGTGCCCGCGCAGATCGAGTTTGTTCGATAATCGATAACTT  
ACTCCGTTTCCAAGCAATCGATAAAAAATCGATATCGATATCCTGTTTTTTGGGCAATTTTGGTAAATAATA  
AGAGCTAGAGTCACCAAACCTTGACATATAGCTTCTAAAATAGAATATATATATATATATGCAATTTGATGTTG  
AAGAAGAGGGTTCAGGGTATCCCCTAGTCGGGAGCTCCCGACTAGAACCTCTTACTTGTTTAATATNGTTT  
CTAAAATAGATTATATTTGCATTTGATGTTGGAAGAAGAGGGTTCAGGGTATCCCCTAGTCGGGAGCTCCC  
GACTAGAACCTCCGTCACTTNTTANTNGATTNTGCAATNCATAANGGAACCTATATGCTAAAAGCCTAGTT  
AAAGAACATAATTTTTTTAAATAGCATCACGGACCGATGGAGGTGTTTTATTTGCCAGCTGTCCCCCTCTCA  
CAGTTAATATTGTCAGTGACGCTATTAGAGCCAACATCTAAGCAGAAGAAAGTATTCTTAAGTAAAATTA  
AAAATAATCTTAATTGGCTATATTAATAGACAAATACAAAAGAAATGTAAGCTAGATGTATAGAGTAGAT  
AGGACAAAGAGAAAAGTAATGCGAAATCACCGAAATCAATTTACAGCCTGTGCGGCAAGCAATACCCCT  
GCTCATAGGTAGGAATGGTCAGTGACTTTCCGAAGGTATCCTGAAAGCATCGATTTTATTAGGGGTAGGT  
AAACAAACAATTGAAGACGCCCTAGCAGAAAATGAGATTCTATA  
>9\_rnd-5\_family-2824\_\_LTR\_\_Pao  
TAATATAAACTTCTGCAGTACTATTTTTTTGGTCCGACTCAATGATAGCCATCAGTTGGATCCGTGGAGGAG  
GTGCAAACTGGAAGGTATTTGTTTCAAATCGCATAAAACAAAATTCTGGAGATCTCGAATGGAAGACAATG  
GAGACATGTTCCCTCGATTGATAATCCTGCCGACCATCTGAGTCGGGGAATTAGCGTATCTAAGTTGACGG  
CATGTGAAATGTGGTGGCATGGACCGCAGTGGTTACAAGGTCCGGAAGAAGGATGGCCTTGCAATAACAT  
TGATCAACAGTCACTCTACAAGAAGCTTGACTTGCCACAAAATATCATTGGAAGAGATGCCTAGCTCGA  
TGTTTATAAGTCAATATTCATCGTATACCCGACTTCTTCGAGCTATGGNATATGTTAAACGTTTTATTTCGAA  
ACTGTCGCATAATAGAGTCTGAGCGCAAGCGAAGTGAGTTATCAACAGATGAACTAGAGGAAAGCCTCA  
AAGAAGTAATAAGATTGGTGCAAAAGGACTGTTTTGAAAACGAATGGAAGGCACTCTCTTCTAGCAAGCC  
GGTCCCAAGAGATAGCAGTTTATTACCTCTCAACCCATATTTTGATTTGGGGGAGCGTCGTCTTACGGCTC  
GGAGGAAGATTACGCGATGTCTTGTTGCCAGTGAATGAGAAACATCCAAATATATTGCCCTATAAACATN  
ATTTACGAGTCTTGTCTGTAATTATAGTCATGCTTGCACCTTGCATGGAGGCTCATCGCTCACACTCAAT  
TATATAAGAAAGAAATTTTGGATCATCAATGGGCGTAACGCAGTTCGTTTTGGTATACATAAATGTATCAA  
ATGTTTTTAAATGAAGCCTAAGTTTGCAAGTCAACAAATGGGAAATTTGCCAGCGGTGCGTGTGCGGCC  
TCAAGAGCTTTCTCATCTACCGGAGTTGACTATGCTGGACCTATTAATATTTTCGCCATCCAAGGGAAGAGG  
ACGTGTAGCACAAAAGGGATACGTTGCCGTGTTTATATGTTTGGTGACCAAGGCTATACATTTAGAGCCA

GTTGGAGATTTAACGTCAGATGCGTTTTTAGGAGCCTTACATCGATTTCATAGGCAGACGTGGTCTATGTAC  
NGATATTTACAGTGACTGTGGTACAAATTTTGTGGCAAAAACTACAAGCTGATAGGGAGGCATACTAC  
TCATACATTTCAAGATTAATCGCGCCAAAATTGCTGAATCCACTTTGGTGGATTATGGGAAGCCGGAGTTA  
AGTCCATGAAGTATCATCTCAAGAGAACCATTGGAGAGCGAGTGTTAACCTTTGAGGAAATGGCGACAGT  
ATTAGCACAAATTGAGTCTTGTCTTAATTCAAGGCCTCTATGTCCTATTTTGAATGATCCTGAGGATTTGAT  
GGTGTTAACCCCGGTCACCTTTCTCACTGGTGATGCGCTCTTGTGCGCTCTTACAACCTGAAGTACCTCAAC  
TGAGTTTAGTGCATCGGTGGAGAACTGTCAATACTATTACACAACATTTTGGAAAAGGTGGAACCTCTGA  
ATACTTGACACGGTTGCAGAGAAGACCAAAAATGGCTGCAGATGAAGAGAAACCTAGATGTTGGATGCAT  
GGTGTTAATTAAGGATGAACGATTCCCTTCGCATCGGTGGCCTTTGGGTTCGGATTACAAGCACTCATGCTG  
GTGCAGATGGATTAGTTAGAGTTGTGACTCTAAAAACAAGCAGTGGTGTTATCAAACGGCCAGTAACAAA  
GCTCTGTCCATTACCCATACAAGAGAATTGGCTTGATAATGACACCTAACCTTTACGTAAATGTTAAATTG  
TACTCTTCTATTTTCAGTTTAAGTTAAGGTACCAAGCCCGAGAATCTGACAGTTGGCGGACGTAAATTTGA  
TGATGAATGCTGCAATCATCAAAGGGGGGAGAATGTTTGGGCTACAGCCTATCAGCAAGAGCAATCGCGC  
CAGCCTAAGAGCGGATATTATAAGAGAGCGCATGAAAAGAGCGATTAACGAAAATGCACCTGCGCTTAG  
ATCAGCCGCATTTGAGTAATGTCTTATCACTCAATAGATCACGCGCTATCACGGTTGAGTTGAGTTGAATT  
TAGTGGCTCTCTCAAGCGCTCGAGCATTGAGTCTGTTACTTTAAGTTATCTTATTTTCTTGTATTTTCGTAA  
TTCTATTGAGCTTTGAATTTGCACGCTTAGTAACAGCGGAATTTGCGACATATGTTGAAGTCTGTGAGCGT  
CAGTCCAAGTCAACGGACGTATGCTCTGTGTAGGTCAAATTAATAATTATAGTTTTTAGGTTAAGTTCAAT  
AAAGGTTGAAGTTTAAAATGAACAACCCCGCTCGTGAACCTGGGATTCTTTTGCTAACCTCATCATTCCCAC  
CAATCGTGCAAAACCTCAAAGCCGCCTCGGTTGGTAACCACGCCGCAGGCCGCATCATATCTACGGGCA  
GTTTGGGGCTCCGCACCTGGCGCAGCCGATATCACCAACA

>160\_rnd-5\_family-1549\_\_Unknown

ACCACTAACCATACAATGTATAGACATACCAAATGGCACTTTTAATCGAAACAAGAAAAATCGAAACGAG  
GCGACCCCAATGGTACCTGCGACCATTTTAGTGTGCCAGACACTGCTGAGACTGCTGAGAGTGGCAGCC  
GAACGCCGGCCTCAAAGCCGAACGTTCAAGTATGAAGCCGCATCTCGCTCAGCGCACAACGTCGCGGCTG  
ATGCGTTTTCTTAATATATGTATGTATGCCATTTTAAATCCTTACAGCCCAAAAACATATATGTGTATGCA  
TGTGCCTCGCTCTCACTCATTGCTTCGCGCACTTGCGTCCATCTCTTCTCCCTCCATAGCTTCCCACAAA  
CCCCGAGATCTACAAACATTCATACGTTTGTGTTGTGTGGATGTGCGCACAAGTAGATCGCGGCGTTTGTG  
GCGAGCCAGAGGTTATTTCTTCAATTGTGTGCCTTTTGTGCCTGTGGTAGCAATAGGCACTCACATTTAAA  
TGCTCTATCATGTATTTCTTCTGTCAGTCAGGCATGATGAGAAGAATTTGATCAAATTTTATTTAATACAC  
AATTAATTGACCTAAACAAAATATTTATATTTATTTTCTGTTTACTGTAGGGACCTATTTTGCTTAAATAC  
AAAAATATCTAAGTCGTATTTCTGCAAGGGTAATTCATCGTCGGCTTGTCGAAGAATTTAAGAAAAGACC  
AAAAATTGACGCACACTCTTCAAGTAAGCAGTTGTGTGAAATTATTAAGGGTTTGGCCTGTTTCATGTGC  
AAAATTGCTATTTTCCATGCTTGTGTAGGGGTAAGGGTACCTGATCGCTGGCATGTGTGCATGATAACTT  
TTTGGGTCGGCCAACCACGCACACTAACACACTTTTCTATATGGATGGAAGCATTAAATGCGTTTGTGTGCG  
TGTGGTTGCCTGCCTGCTGCCCCGATGCAAATTTGACAAAATTTGAAGTTTTTGGCATTGTGTGAATTTGCA  
GCTCTACACACACATATACACGCNCACGAATGTGTGCGAATGAGCTGATCAAGGGTTTGTGCTGAGGC  
AGAGATATTTTATCAATGGGTGCGTAAATTTGGGCGACTGGCACGGTCTTTGTTTTTTTGGCATGCCTGC  
GGTGGGCTTGTGAATGAAACAGGTGGATCGCACTTGTGCTCGTTTGCACCTTGATATGGAAAAAATGCA  
AGTAATCTTTTATTGGCATTATTATAATCTTAGGTTAAAGGGTTTTATGACAGGCAATTAACGATCAGAAT  
GTATAGCATGCGTCTGGATCCATACCATTTTTCATTGCCTTTTTATACATTTGTGCCTTTTGCGGCTGCAAGC  
CCACCGCAGGCATGCCAAAAAAACAAAGACCGTGCCAGTCGCCCAAATTTACGCACCCATTGATAAAAAT  
ATCTCTGCCTCACGACAAACCCTTGATCAGCTCATTTCGCACACATTCGTGTGTGTGTATATGTGTGTGTGT  
AGAGCTCGAAATTCACAAATGCCAAAACTTCAAATTTTGTCAAATTTGCATCGGGCAGGCAGGCAGGCA  
ACCAACACGCACACAAGCGCATTAATGCTTCCATCCATATAGAAAAGTGTGTTAGTGTGCGTGGTTGGCC  
GACCCAAAAAGTTATCATGCACACATGCCAGCGATCAGGTACCCTTACCCTACAACAAGCATGGAAAAT  
AGCAATTTTGCACATGAACAGGCCAAACCCTTTAATAATTTTACACAACCTGCTTACTTGAAAGAGTGTGCG  
TCAATTTTTTGGTCTTTTCTTAAATTCTTCGACAAGCCGACGATGAATTACCCTTGCAGAAATACGACTTAG  
ATATTTTTGTATTTTAAAGCAAAATAGGTCCCTACAGTAAACAGAAAATAAATATAAATATTTTATTTAGGT  
CAATTAATTGTGTATTAAATAAAATTTGATCAAATTCTTCTCATCATGCCTGACTGGACGAAGAAATACAT  
GATAGAGCATTTAAATGTGAGTGCCTATTGCTACCACAGGCACAAAAGGCACACAATTGAAGAAATAACC  
TCTGGCTCGCGACAAACGCCGCGATCTACTTGTGCGCACATCCACACAACACAACGTATGAATGTTTGT  
AGATCTCGGGGTTTTTGTGGGAAGCTATGCAGGGAGAAAGAGATGGACGCAAGTGCGCGAAGCAATGAGT  
GAGAGCGAGGCACATGCATACACACATATGTTTTTGGGCTGTAAGGATTTAAAATGGCATAACATACATA



TATTAAGAAAACGCATCAGCCGCGACGTTGTGCGCTGAGCGAGATGCGGCTTCATACTGAACGTTTCGGCT  
TTTGAGGCCGCGTTTCGGCTGCCACTCTCAGCAGTCTTACTCTGTCTGGGCACACTAAAATGGTCGCAGGT  
ACCATGGGGTCGCCTCGTTTCGATTTTTCTTGTTTCGATTAAAAGTGCCATTTGGTATGTCTATACATTGT  
ATGGTTAGTGCT

>9\_rnd-1\_family-209\_\_Unknown

CATCCGTTTACTGTTATTACCGACCACGCATCCCTTAAATGGCTCATGAATCAAGCAGATCTCAGTAGTCG  
TCTAGCTCGATGGGCTCTCAAGCTTCAAGGATATACATTTTCTATACAACATCGGAAGGGCAGTAAGAAT  
ATTGTACCAGATGCTTTATCCCGTACTCACACGGAGGATTTATCGGCTTTAGATGTCGATGACTTTATTGA  
TATGCAGTCTCCATATTTTAAATCCCAGGGTTATGAGTTGTTGAAGTCTAAAGTTTTGCAGAATCAGACTC  
AAATGCCGGACGTCAAAGTTATCGATGGCTTTATTTATCGAAGGTCCGAGCATGCCTCAGGAGACAGAGT  
TGCGGATAACATGGTTTGAAAATTATGGCTACCCAAAGAGTTGGTTCCCATGCTTTGAAATTAGCTCATG  
ATGATCCCTTAGCGTCGCATTGTGGAATGAATNAGACACTAGAGAGATTACGACGATATTATTATTGGCC  
AAATTTAGTTTCAGACNTGAAAGAGTATATTAATAAATGTGAAATTTGCAGAGCGACTAAACATCCGGAT  
CGTGTTTTGAGACTTCCTATGGGAAAAAGTGGAGAAACTCATCGATGTTGATTATCTTGGACCGTATCCCC  
GTTCCAAGGCTGGTCATATTGGCATATTCATTGTGCTCGACCATTTACAAAGTTTCCTTTTTTGAAACCTG  
TTCGCAAATTGACCGCAGATGCTATTCTACCGTTTTTGGAACAAGAGTTGTTTCACTGCTGTTCAATGGTG  
TTCAATTTAAATCACAAATGTTTAAACGATTTACTTCGAAAGTATTCGATACTCCACTCGGTTGATCCCGCTT  
GCTACTTCTAGAACGTACGAATAAGCAATAGAGTCTTAACCAGCGCTCACAATGGACGTCGAACCGATTT  
CGGACAAGTTATAGCCCGTCGAAAATCGATTGATGTGTGAAATATATGACGAACTGCAGATTTGCGTTTC  
CGATCCCCAGACTTTTTTCTATTCAAATATTAGTTTATTTTCAAATCTTATTTGAGAAAACTAACCTCTGAC  
CCAGAATCTAACAGAGTCTACCCAACTGGTAGCAAGCGGACAGATCCATGACACGAGTCCCCAGTGCTG  
CCAATATGACTGGACAATGTGGGCCATTCATTTCTTCTTCTCGGGATCGACCAGAAAACGACAGCT  
CAGCTAAAAGGTGCCTAAACGCCTGCTGAGAGCAGTCTCGAAGTCGAACTATCAAAGAACGAAAAAAG  
CCAATTGCCAAACTGCCTTTGGCTCCAAATTCCTCTATATTAATAAGGTATTGACCAAATTTTCAAAAAAT  
CTGATAAAAGTTTTTATGTTGGTCATCAATTTTCATATAACTTTGCCAATATCAGTTTAAAATATCTTCTTGA  
TACAGCTTGGTCCAGCCATGGTCATTAATTGTGTCGTTGTGTTGATGCAATGACTCTTTAATATCTGCTCTA  
GACGCATACGAAGGGTAAATTACGTCCGAAGGTACCAGCAATATAACGAATCAAATTTCTCAGCCTATAG  
GGGATAAATATTGCATGTACAAACTTTTATAATACCCAGAATATCAAACACATTTTATGTGGGAAGTAG  
ACAATTCGCTTTGTTAGTAATGACACCTTTTGCATAGTAGAGCTTTCATCTTCTTGCAGGTATATTTAAATT  
AGTCCAATTGTGCAATTGTGACAGATAATTA AAAACTTAAGAATGAAGCAATACACTGAAACAAATAGTT  
ATGTATATTTTAGATTACCGTTGTTACATTGTGAGAAATAAAACCATAGATCTAAGCACATTGCAGTGTCA  
CAAATAAACTATGAATTAGAAGAAATTCTGCACGACTACAGCGTCCTGAAATCTCATGTAGTTTTTACAT  
GGTATTTGGTAGAGTGGGGATTTCTAGTTCAATTTGCTGAATAAGTTCACTCGTTCATTTTCTGGCCGTGA  
ACTAAATCGGTCATTNAGTTCACTCGTTCAGTTATTCAGTCGGTCATGAACGATGAATTCTGCTCAGCTAT  
TCAGTCGGTCATGAACATTTGCTTAGTTTCACTTATNCAGTCAATCATGAACGATTATATTTCTGTTTCACT  
ATTTTTCANGTTTTTCACTTGCAAAANATATGTTATACTTTTTACTTATTATAGTGTACCATTGATAATAGAT  
ACAAATCAAAAGTGAAATTA AAAATCCCGCTATCTTTTATTGTTTATTTTAAGAACTGAACATCTCAAAAGA  
ATGTATCGTTCAGGAACGGCTGAACTGCTGAGTTGCATACANCGTTCATGACCGACTGAACGAGTATCAA  
AAGTACAGAATACATCGTTCATGACCGACTGAATAGCTGAACGAGTGAACATAAATGACCGATTTAGTTCA  
CTAATCACTGAATNAGTTCAGTAGTTCATTTTAAATGACCCGTTCAATCGAACTTGGTCTGAACTAAACGAC  
ACA ACTCT

>160\_rnd-1\_family-49\_\_RC\_\_Helitron

TTTTTATACCTTGCAGAGGGTATTATAATTTTGTGCTGAAATGTGTAACGCATAGAAGGAGACATCTCCG  
ACCCCATAAAGTATATATATTCTTAATCAGCATCAACAGCCGAGTCGATATAGCCATGTCCGTCTGTCCGT  
CTGTCTGTTTCTATGCGAACTAGTCCCTCAGTTTTAAAGCTATCTTAATGAACTTTGCAGAACTCCCTCTT  
TCTGTTGCACGCAGCACATATGTGAAAACCAGCTGGATCGGACCACTATATCATATAGCTGCCATAGGAA  
CGATCGGTCGAAAATTAAGTTTTTGTATGAAAAAACATTTTGTTTATCAAGATATCTTGACCAAACCTCGGC  
ATTTATTAGTTTTACTTTACTCCTCATATATGTGCAAAATCCTATTAAGATCGGACCACTATATCATATAGC  
TGCCATAGGAACGATCGGTCGAAAATTAAGTTTTTGTATGAAAAAACATTTTGTTTTTCAAGATATCTTGA  
CCAAACTCGGCATTTATTAGTTTTACTTTACTCCTCATATATGTGCAAAATCCTATTAAGATCGGACCACTA  
TATCATATAGCTGCCATAGGAACGATCGGTCGAAAATTAAGTTTTTGTATGAAAAAACATTTTGTNTCA  
AGATATCTTGACCAAACCTCGGCATTTATTAGTTTCACTTCTCATATATGTGCAAAATCCTATTAAGATCGG  
ACCACTATATCATATAGCTGCCATAGGANCGATCGGTCGAAAATTAAGTTTTTGTATGAAAAAACATTTTG  
TTNTCAAGATATCTTGACCAAACCTCGGCATTTATTAGTTTTACTNTACTCCTCATATATATGCAAAATCCT

ATNAAGATCGGACCACTATATCATATAGCTGCCATAGGAACGATCGGTGCGAAAATTAAGTTTTTGTATGA  
AAAAACATTTTGTATTTTCAAGATATCTTGACCAAACCTCGGCATTTATTAGTTTTACTTTACTCCTCATATAT  
GTGCAAAATCCTATTAAGATCGGACCACTATATCATATAGCTGCCATAGGAACGATCGGTGCGAAAATTA  
GTTTTTGTATGAAAAAACATTTTGTATCAAGATATCTTGACCAAACCTCGGCATTTATTAGTTTTACTTTA  
CTCCTCATATATGTGCAAAATCCTATTAAGATCGGACCACTATATCATATAGCTGCCATAGGAACGATCGG  
TCGAAAATTAAGTTTTTGTATGAAAAAACATTTTGTATTTTCAAGATATCTTGACCAAACCTCGGCATTTATTA  
GTTTTACTTTACTCCTCATATATATGCAAAATCCTATTAAGATCGGACCACTATATCATATAGCTGCCATA  
GGAACGATCGGTGCGAAAATTAAGTTTTTGTATGAAAAAACATTTTGTATTTTCAAGATATCTTGACCAAACCT  
CGGCATTTATTAGTTTTACTTTACTCCTCATATATATGCAAAATCCTATTAAGATCGGACCACTATATCATA  
TAGCTGCCATAGGAACGATCGGTGCGAAAATTAAGTTTTTGTATGAAAAAACATTTTGTATTTTCAAGATATC  
TTGACCAAACCTCGGCGTTTATTAGTTTTACTTTACTCCTCATATATGTGCGAAATCCTATTAAGATCGGACC  
ACTATATCATATAGCTGCCATAGGAACGATCGGTGCGAAAATTAAGTTTTTGTATGAAAAAACATTTTGTAT  
TTCAAGATATCTTGACCAAACCTCGGCATTTATTAGTTTTACTTTACTCCTCATATATATGCAAAATCCTATT  
AAGATCGGACCACTATATCATATAGCTGCCATAGGAACGATCGGTCCAAAATTAAGTTTTTGTATGAAAA  
AACATTTTGTATNTCAAGATATCTTGACCAAACCTCGGCATTTATTAGTTTTACTTTACTCCTCATATATGTG  
CAAAATCCTATTAAGATCGGACCACTATATCATATAGCTGCCATAGGAACGATCGGTGCGAAAATTAAGTT  
TTTGTATGAAAAAACATTTTGTATNTCAAGATATCTTGACCAAACCTCGGCATTTATTAGTTTTACTNTGCTC  
CTCATATATATGCAAAATCCTATTAAGATCGGACCACTATATCATATAGCTGCCATAGGAACGATCGGTGCG  
AAAATTAAGTTTTTGTATGAAAAAACATTTTGTATCAAGATATCTTGACCAAACCTCGGCATTTATTAGT  
TTTACTNTACTCCTCATATATATGCAAAATCCTATTAAGATCGGACCACTATATCATATAGCTGCCATAGG  
AACGATCGGTGCGAAAATTAAGTTGTATGAAAAAACATTTTGTATCAAGATATCTTGACCAAACCTCGGC  
ATTTACTATTTTCCCGGTACTTCTTAGATAGGGGCAAAGCACTATGAGCATTATGCAAAGGTTGGGTCTGC  
AAGGGTATTAGATCTTTGGCGGGCCGAAGATAGCCCTTCTTTCTCGTTA

>Ref\_dvir\_413

TATTATAATTATAAGAAATATTAAGCTTTAATTTTTTTTAAACCCTAATTGGTGAGTTGTTTTACCCGTT  
TCAGGCTGCCTACTCAAAGAACGCCAGGACGTATCTAGTGGTAGTAATCATGTAAGCAGTAAACTAGAA  
ATTAGCAATAATATTAGTGATATGTCTAGCATAGAAAATAATAATTCTAATTATAGTCTTAATGAGCCTAC  
AAATTGTCCGTCTGAGTTTAATAATGACGCATGCTTTGTGCGAAGCGACATTAATAATGCTTTTCGGAAAAAAT  
ACCACAATTTTCATGATAGCTTAACAGAGAAGTTCAGTTAGTTAGTAATTTGAAAGGATGCCGCGCAGC  
ACTTTCAGGTTACAACAATTTGGATACTGAAATGAGTATCCAAGAATTTATGGCCACGTTAAATCAATTGT  
GTGCGATTTAAAAAAGCATTGAACACATTATTCGAGAAGCATACACTTTTCATAACAATGCATGT  
GTTTTGTACTTTAAGTCAATTAGATTTAACAACAACTCTTTTGCTGCATATGGTTACTGCAAAGATCCGTC  
ATGCAATTACTTTTTGTTCCATGGGACATTTGACGGTGTTGTAAGTGTATACACAAGCAGCCAACATATCT  
CCCATAACAATTGGCCTTAAAAAGTCAACGCGATGCAGAACAAAAAATAGATTTATAGAAAAGGCTTCCAT  
TAGAACTCTTCTGCGTTTGAATATAGATCAAAAAAAAAAAAAAAAAATCAATATGTCTCGAGCCAGAGTTG  
GTAATGATCAGATTACTAATGAGAACTACCCTTTTATAGAAATTTAATTTTCGGAGGAAAATTGACTTTGA  
CAACTCACGGATAAATCGTCCTTGCTTTAAGCGTTTTTATTATTTGTCTTTATAAACTATATTTAAGCGTT  
TTAAAGAATGATTCTATAGGCCATTACTGGGTCTTTTATTAGATTTATCAATAAAAGTAATGATAATATT  
GGTTCAAAAAGGTGCGTAAACAATATATTTATTTAAAATTAGATCCAGCATTTCTGCACTTAAATAAATAT  
TTGACGTACAGAAGTTGCTTTTATATTGTGATACAAGTTCTGTAACCTCTGTACGTATTTCTTGAAGATTAA  
GTTTAAATGGACTATTTTCGGCAATGGACAGCAACGTTGGATCATTGACGACTTCCTTACTTACTCCCAAT  
TTTATACTGTCTATCAAATAAAATGTGGATGGCTCTTCACAATATTTAGTAAAATAATTAGCGGCATCATC  
CACAATATTATTAACATATGGAGAAAGAAGTATTATTGCAATATTTTCGGAACCATTTTTCTAATTTTCCAA  
TATTATTTATGGAATATGCACAACCCAAGGCATTTCTTAAAAATGATTTAAGATCAATATTGTCCAAACCA  
ACTACTTCATCTATGTTGCGACACTTAATTTTGCTGTAGTGGCTCATACAAAATTAACCCACACTTTTG  
AAATGTGCGATTTAAATTATACAAAAAACTAAAACAAATTTTCATTGTACGTTGCAAGATCAATGTTGTTAT  
ATTCTTTTAAAATGGCTCCAATTATTGCAAACTGACATCAGTTATAATCTTTTGCAAATAGGCCATTTG  
AATTTATTTTTTATGCAAACTCGCGCAGCTCACATAGAAATCTGCCTATATCTGACGATTTATGATTGGA  
GAGAATCGCATGTGCGACAGGAAAAACGATTCGAAGCTCTGGAATATAAGCAACCAATGAATATAAAAA  
TGTACATTTTTTGTATCAAGTTCATTGGCTGTACTACATTCCCAGTCGCATCAATATGCAGTGTCTGTCCCAT  
AAAAATATTTCTAGTTTCATAGAAAGTAACTGAATAAAGTTGGCATAACACATTAGTAATCATATCGAAGG  
TATCTTTAAATGGATCTTTGTCAAAATCAAATTTTCCATTTTCTTCGAAATTAATTTCTATAAAAGGGTA  
GTTTCTCATTAGTAATCTGATCATTACCAACTCTGGCTCGAGACATATTGATTTTTTTATTTTTCTTTTTGA  
TCTATATTCAAACGCAGAAGAGTTTCTAATGGAAGCCTTTTCTATAAATCTATTTTTTCGTTCTGCACCACGT

TGACTTTTTTAAGGCCAATTGTATGGGAGATATGTTGGCTGCTTGTGTATACACTTACAACACCGTCAAATG  
TCCCATGGAACAAACGTAATTGCATGACGGATCTTTGCAGTAACCATATGCAGCAAAAGAATTTTTGTTA  
AATCTAATTGACTTAAAAATGCTTCTCGAATAATGTGATCAATGCTTTTTTTTAAAAATCACACAACAATTG  
ATTTAACGTGGCCATAAATTCTTGGATACCCATTTTCAGTATCCAAATTGTTGTAACCCGAAAATGCCGCC  
GGCATCCTTTCAAAATTACTAACTGAACCTTCTCTGTTAAGCTATC

>9\_rnd-4\_family-489\_\_LINE\_\_R1  
GACTCACTGCGAAGCCCGTGCAGACCATTCTGTTGGGTGTCGTCTACAGTTCCACGGTGGTGTCAAAACCC  
AGCGAAGCAGGCGGTGCTCACGCATCAAAAAGACAGCCCCTGCAAACCTCAACTTAGCTGGCCATAATGG  
CAACCCAGAGAGCTGGACAGCAGTGAACGGACGTAAGCGAACGCAGAAGCGTCCCAGAGCCGACGCCAT  
TACAGTCCACGGAGTGGGTGACTGCACATATGCCGATATGCTCAGGCTCGTGAAGAGCGACCCGGCCCTC  
AAGCACCTAAGTGGCGATGTGCATGGCATTTCGCAAGACCGCGAAGGGCGATCTTCTGCTGCGCCTCAATA  
GGAAGCCGGAGCACTCCGCAGATGAGCTTCAAGAAGCTGTGGGAAAGGCATTGGGTGACCGGGCGGTAG  
TAAGAACGCTAACCGAAACGTCCCAGGTGGAGATCAAGGACCTGGATGAGCTGGCGACTAAGGAGGAAG  
TGCTCGAAGCGATTAAAAGTGCCTTACAAGACGACTCCTTGCCGATTGAAACGATCAAATCGCTGCGACC  
AGCATTTGGCGGCCAGCAAAGGGCCACAGTTACTCTCCCAGCGCCAAAAGCCAGGACGCTTGTGCGAGAAG  
GCCAAAGTGAGGATCGGATGGGTGTCTGCCGTATTCGTGCAATAGACCAACCAAAGCGATGCTTTAAAT  
GCCAGGGTTTTGGGCACATTGCGGCCGAACCTGCACCAGCGGAGACGATATGAAAGGCGCATGCTTCAGATG  
CGGGGACACAGGTCACGAAGCAAAGAGCTGCTCCAAGCCACCAAAAATAGCCTTTGCATACGGAAAGGAG  
AAAAATCAACGGACCACGCTACAGGAAGCTTTAAATGTCCGGCGTATCGCGAGGCAGTACGCAAAATGA  
AATGTTAAGGTTACTCCAAATAAACCTTAACCACTGCATAGCTGCTCAAGCCATCTTGGAGCAGACTGTA  
GGGAGATGCGCATTGATATTGCCATTATCAGCGAACCCACCACCGAGAAACCAACTGCCCGAGAATATG  
GACCGAGGATCAGGATGGAAAAGCTGCGCTCTGGGTATGTGGCGACCCATCGACATCGCTGACAAAAAC  
AAAAGTCTTTTACTGGGTTTTGTACGCGCACAATACGGCAGCCTGTGGATATACAGCTGCTACCTGTGGCCC  
CAAGCATGCAGCTCTGCGAATTTACACAGCTGCATTAGATGCATTAGTAGACGACGCAGGGGGCGGAAGG  
TCATTATTGCTGGTGACTTCAACGCCTGGGCAGTGGAATGGGGCAGCCAAGCAACTAACGCAAGAGGTGCG  
TGCCCTGTTGGAAAGCTTCGCGAGCCCTAGATATAGCCCTGCTAAACTTCGGCTCGGAAAATACCTTCACTC  
GAGGGTGGTATCGGATCCATAATCGATCTTACCTTCGCAAGCTCGTCACTTTTAGCGCAACAAAATGGCA  
ACTAAGCGACTTATACACCGCAAGCGACCACTCCCGCAATAATATGCACGATTGGTGAAGGAACTGCAGC  
CAGCACTAGAAGCCTAAGTCGGAAAGCTTACCGCCTGGATACTTTGACCCCGTGGCCTTTTCGAATGCAG  
TCCACTCGCTTGTCACTGCCGGCAACGCAGAGAGAAGAGCCTCCCAAATGGCATGCCAGCTATCGCGTGC  
CTGTGACGAGAGCATGCAAACCCGGAAAACGTTTCGGCGCCACCATGTACCCACGTACTGGTGGAACGAA  
AATATTGCCGAAGCACGGCGGAACTGCATCCAAGCCAGGAGGAGATACCAGCGAGCCCGAGGTAGACCC  
AACTACGCCGAACAAGGCAGCCTTCTGACCCAAGGTGAGCTGAAGTTGATTGTGGAACGCTATTCCCAA  
TCAGACCCGACGTATTACACACGCAAGCCATACCATCGAGCCACGTAGCAGCCATGCCGTCTCTCATCGA  
CGAAGTCTCAGTCGAAGAGGTGCTGACGATCGCCAGAAGCCTAAAGCCCAGTAAGGCACCGGGTCCGGA  
CGGAATCCCCAACCGAGCACTGAAACTAGCCATGTCTTGCAGCCCGCGCAGTTCGTGCAGCTTTTTAACA  
TGTGCCTAATGGAGAGAACTTTCCCCACAATATGGAAACTCCAAACGCTAGTTTTATTACCGAAGCCTGGT  
AAGCCGCCCCGACGACCCATCGTCATACAGGCCGATTTGCCTCCTGGACACGTTAGGCAAAGTGCTGGAGA  
AGCTAATCTGCAACAGGCTTCAGGTAGCTGTGACACAACAATGGTGGCCTGTCCCAAACCAATTTGGTTTC  
ACCAAGGCAAAGTCTACAATAGACGCTCTGGAGAAAGTGGTTCGGCATAGCAACAAACGCCATCCAAGGA  
TCGAGATGGAAAAGCGGCACAAAAAAGTACTGCCTCATCGTCACGCTGGATGTTAAAAACGCCTTTAACA  
CAGCCAG

>9\_rnd-5\_family-1950\_\_LTR\_\_Pao  
CTGGTGCTGCATGCGTAGAGAACCTTCAGACAATTAAGTCTGCAGCGTCGCAAATACTCGAAAGCGCAGG  
TTTCGAACCTAACCAATGGTTTTTCGAATTCTCCTGAGTTCTCCGCAACAAACGCAGCTAAGCCGATAACGA  
TCTCAGAGTCTGACACAACCAAAACACTTNGCGTGTTGTGGTTGCCGAATGAAGATGCCTTTCAATTCAG  
ATCGACGATTCATTCATGGGTCTTAGAGCGACAAAACGGAACGTTCTCTCGGTGACACGCGGCTNNTTGA  
CCCGCNTGGCCNGTTGAGCCTGATAATGAAGGCAAACATTTTACTCCAAGAGCTCTGGCTTCAGAAGTTA  
GACTGCCGCCGACGCCTCAATAAGAGCGTTTGGCGCATGCGTATATATACGCAGCCATACTGCAGAAGGT  
TGTCGTATTTTCGTTGTTGACATCCAAATCTAAAGTAGCCCCCTCAAGACGAAGACTCTTCCCCGACTTGA  
GTTGTGCGCGGCTCACCTTCTCGCAGATCTTTGTCATCGAGTCAGAAATCTCATAAGATTACCGATTGAAC  
GGACGGTTCTTTGGTCTGATTCTGAAGTCACGCTTCATTGGATTTCGGTCACATCCTTCGTCTTTGGCAACAT  
TTGTGTCAAATCGAGTGGCTGAAATCCAAGAATGGACAGAGAAAGCTGAATGGCGCCATGTACCTACAAA  
GCAAAACCCAGCAGATATTGTTTCAAGAGGCTGCGATGTTGATGAATTACTTGCGTCGATGTGGTTCGATG

GGCCTTCATTTTTGAAGGAACCAAGAGAATCCTGGCCGGTTAACCAGCATCTGATGACAGATGAGATGCG  
AACTCTAGAAGTACGCAAAACAGCTGTTGGACTAGCAGCTATGGTAGACCGACCAGATATCTTGGAACCT  
ATCGATAGTTTTCTCATCGCATGCCAGGCTGCTGAGAGTGTTTGCTTATGTGTTCCGCTTTATTNAAAAATGT  
AAAAATCGAGAAGTACAATTTGAGAGTATCCCTACGGCGCTCGAAAGGAAAGAAGCTTTTCGAGAAAATA  
GTTGAAGTCATCCAACGAGTTGAATTTAAAGATGACAAGGTCATAGCCTGCAGCGTCTCAATCCATTTATA  
CGTGAGTAATGATCTTGGTGCTCCTTTTCGTTGTTGCGAGTAGGGGGACGACTTGTAATTTTCATATGACG  
CCAAGTTTCCGCTACTTAAAAAAAGCTCGCAATTCGCTAGAAGCTTATTAGATACCTGCATTTGACGAATT  
GTCATGCTGGCCCAAGAGCACTCGTGAGTCTTCTTCGTGAGCGACTTTGGCTAATCAACGCTCAAGAGGTC  
TGTCGTCAGACAGTGAGATCATGTATCCGTTGCTTTAAATGCAAACCTCGTCTGCTAACACAAATTATGGG  
AAATTTACCAGCAGATCGACTCCGAGCGCTCCGCCCATTTNCTATCTGTGGCGTCGATTTTTGTGGCCCAA  
TTAGCACGACCTTTTCGAATGCGTGGAAGCCTACGTATAAGTCGTACATAGCACTGTTTGTTTGCTTCGCC  
CCCCAAAGCGGTTCACTTAGAACTAGTATCTGACTTATCCACTAATAACATTTATAATGGCTTTTCAAAGGT  
TCGTCCGGCCGTCGAGGAGTCCCACAGACCGTCCATTGCGACAACGCGACGAACCTTCNTAGGAGCAAGTCG  
CCAGTTCCTGGAGTGCGAGCTCAATCGGGGAAGAGGCGGACGCAATTCGCGAATTCGCATCAAAAACGG  
ATGCGAACTTGCGTTCATACCGCCAAGAGCTNCGCACTTCGGGGGTCTGTGGGAGGCAGGTGTGGAGTCT  
GCAAAGCACCTACTCCTACGGACGGTAGGCAGCCTGCTGCTAACGGCCGAGGAGCCGCAGACGACTCTTG  
TCGCAGTGGAAGCCGTCCTCAATTCCAGGCCCTGGGAGCAATAAGCGAGGACCCAAACGACGGCGAGG  
CTCTAACGCCAGGCCACCTACTGGTGGCGGGGCTCTGCCAGCAGAGGGGACCCCGGACCAGCAGGGTCTC  
ACCTGNNTGAAGGATCAAAGGAGTATATGCTCGGACTCCAAGTGCGGAGCAAGTGGCACCGTCGCCTGCC  
AAACGTNGTCGTGGGAGAGCTGGTGGTCGTGCGCCGAGGANAATCTCGGCCGCCCCAGCAGTGGCTGATCG  
GCAGAGTGACGGCAGTGACGCGAGGAGAGGACGGCGTCGTTAGAGTGGCAGANATTAGGACGGCTAGTG  
GCGGAAATTTTAAAGGCCGATCCACAAGTTGGCTCGGCTACCCGTGGAATGAAGCCCCCAAGCGCTTCA  
TGGTGGCCGGTGTTGGCGCAGATCCGCGCATTGAATTAATAAATGAAAANGAAACATGAAGTCTAGTGTA  
AATTGGNTTTAGGGCGGAGCGAGACCGCAATAAAGCTTTA

>9\_rnd-1\_family-321\_\_LTR\_\_Gypsy

TGGAGGACCTAGAGGAGCGAGCCATTACGTACGGTATCGCCCTCGATAGATTGCCCCGGGTAATGAGCGA  
GGTGTCTGCGACAGGGCCGCTCGGTGGTTCTTGAGCAGTGGGCTTAGAGATGTGCCATGGTCGGTGTTCA  
GGAGGGGCTTCTTGAGTTCTTCTGCCCCACGCTACTTCGAAAGGCTTGAGGACGAAATCCGGTCCCGC  
CGGCAGCGCGTGGGGGAGGAGTTCAAGGAGTACCTGATAGAGCTGAGAGCTCTGATGCATCACGCCAGA  
TACGAGCCGGCGCAGGAGTTGCACCGGATCTACGAGAACGCCGCTCCCGAATACAGGCTTTACGTGCGAC  
GGCAAGATTTTTCCACCTTGTTCCAGCTGACTCAGCTNGCNGTGGAGTACGAAACGGTGATGAGACAGCG  
AGCGGAATACTCCGGAAGCAGGGCAGGGAGTCAGGTGGTCGCGAGCTCAAGTAGCGCGGAGTGGGAAAG  
GACGGTACAGCCCCCGGGGACACCTTAACCCATTCCGGTCTACTCCCATCGGATCCGGAGCGATCGTTGT  
GGATAGACAAGTCTCCGCCCCGCGGCAACGGCCCCCTGCGGAAGTGGCCCACCGAATGATGAACCAAGA  
GGCCGGAACCGGGTATGATCCGCGACGAGCATGTGCGCAGGTGCGCACAGGAGGGGCACTTTGCCAGGGA  
ATGTCCCAATGCGCCCGTTTTGTTTTGTTGGGTATGTGGGGCACCGGGGCGAGAGTAGCCAGGATTGTTGT  
CGCCGCACGGAGGCGGGAAACGGGGCAACGGCGTCGCCAGGTCAGGGTCGGGTGCGACGCCGACACACAC  
GGGACTCGGTAGTAGTACACCCGCTTAAGGTGGAGGGGTGGCCGGATCGTCGCCACGGTGGAGATTGGCG  
GGCGGGCGATGCCTGCTACTATCGATACAGGGGCCACTCGCAGCTTCATGAGTGAAGACTGCGTACGCAA  
GTGGGCGATTGCGGGGAGAGTGGAGGACGTACAGGCGCGCATTCGTCTGGCAGATGGGTCCACGCTCGA  
AGTAGGGAAGGCCTTGAGGGTAGACGTGCGCCTAGCGGGGAAGGCGGTCAGCATGTTAATGCTTATCATG  
CCCGCAATGCTGGACCACGTCATCCTGGGGATGGACTTCTTGGGTGCGATGGGCACTACGATACGCTGCG  
GCGAGGCGGAGCTGGTCCTAGAGGCGGGGACGGCACCGGCCGCGGGGCCGGGAACCGGGAAAGAGCCG  
AAAGAAGGCCTCCCGCGCCANGAGCGGGAGCGCCTGCTCGGCAACCGATGGCAGAGGAGACGAAGAA  
GGAACCGAAGGAAGGCCTCCCAGGTCATGGAAGGGGAGCACCTGCTCGGCAACAGAGAGAGGACACCAA  
GAGGGAGGAGGAAGGCCTCCCAGGTCANGAAGGGGGAGCACCTGCCCCGGAACCGATGGAAAGGGGAA  
CGAGAAAGGGANCGTCGAAGGGANCTCACGTAGGATTGGACCAAGGCGGCGCGTAGACTTTCAGCGGCA  
GGTCTACGCCGGTACGAGGCGGCACGGAAAGGTGCCAGGTAACGGAGGGGANTAGGAGCAATGGCTAG  
AATCCATACGGACACGGGGGATCAGGAGCGACTGCCAGAGGGGAGCGAGAGGGGGTTGTGGTGCCCCGA  
GGAGGCGAGACGCGGGGCGAGCNCAGCATCGAAGAGGCAGAGTGGCCAGCGGATCTGGATCCGGAACTT  
AGGGAGTTCCTGGAGTCGGAACCTGGCACTCTTCGAGGGGCTGCAGGGAGTCTCGCATATCGCGGAGACA  
GGATCCGGCTGAAGGACGACAAGCCATTAACACAGCGATATTACCCGAAGAATCCGGCCATGCAGAGGG  
TGATTGACGAACAGGTAGATGAGCTGATCCGGGCAGGGCCATCGAGCCGTCGCGTAGTCCGCGACAGCGCC  
CCAATCGTCTTAGTCAAAAAGAAGACTGGCGAATGGCGCATGTGCATCGACTACCGGCAACTCAACGCGC

ATTCCGTCCCAGATGCTTATCCTGTTCCCAGGATTAATCACATCCTTGAGCGGTTGCGTCACGCCCGGTTT  
ATCTCCACTCTGGATTTGAAGCACGGGTACCGGCAGATACCGATGGCAGCCGATAGTCGGGAATGTACGG  
CGTTCACGGTCCCCGGAAGAGGTCTTTTCCAATGGCGGGTGATGCCATTTCGGTTTACACTCGGCGCGTGCG  
ACCTTCCAGCGAGCCTTAGACACGGTCATAGGGCCGGAATGGAGCCTCATGCGTTTCGCTACCTAGACG  
ACATCGTGGTAATAGGGGGCAACGAAAGAGCAACATGTAGAGAACTTGAGGGAGGTGTTCCGCCGGTTAA  
GGGCGGCCAATCTCAGGCTGAATAGNAAGAAGTGCAGTTTCTTCCGGGAGAGGTTGGCTTACC

>9\_rnd-5\_family-1958\_\_LTR\_\_Pao  
ACTGTGCTAAAAATTGAAAGCCCAACTCTATTGGTTTGGTTGCGCTAATGAAGCNAACGCTTTCAATTCNC  
GGCACATATGTGAAGTAGTTGAGCATAATTAATAATTTGCGCGCACTTACTAACCGCCTTGGANATTCCTAC  
ATATAATTTAGTATTCGTGCGAATTAGTGCTTCTGAGCGAATGATAATTAGTGTCGAAAATTAATTGTCAC  
TNCAATTTNATTTTCGCTTAGCTTTGTCTGTCNCTCCTTCTTTCCATCACTCGCAACCACTGTNAATTATACA  
GTTGCCCGAGACCAAGCGCTTGTATATAAGTGCAGTACACGCGTACATAGCAAGATCGGTCAAGAGACGC  
TCGCTTCCCTACGTTTNTTGATCAGGCATATCAGTTTTTGAATTCGTTTGGCAAATTCGATTTTAATTTAAA  
TTAATAATTATTAATCGAATTTAGAGTCAAATATGGCTACTAAGGAAAGTTTTGACGATTCAAAAAAGA  
AACGCAATATGTCCGTTAAAAGCATAATGCGTTTAAATGATCAAATAATAAAGGGTAAATTAACCTAGA  
GTCTACAGAGTTAGAATGTAGATTAGAAATGCTGGCCTCACATATAGATACAGCGTTAAAATATCAGACT  
CGAGTAGAACTTTTGACCCAGATGATGAGTATCGTGCCGAGCTCGAAGAAGTTTGTATAACGACAAAGG  
CTCGTCTAAGGTCCGTTATCAAGACATTAAGTCCTGCAACGCCTACAGGCATGCCCCGTTGCGGCTCCACGC  
ACACGNCTTCCGCATCTGGCGCTTCCCAAGTTTAGTGGAATAACTCCGAGCTTAAGAATTTTATTAGCCT  
GTTTCGAAACTCTTGTTTCATAACGATNATGCGATCCCGAGCATAGAGAAATTCAATCATCTGATCTCATGTC  
TCTCTGGTGAAGCTCTAGGCACTGTTAGAGCGTTTCAAGTCACCGAGGACAATTATTTAAAAGCATTGGAC  
AGCCTAAAGAGAGTATACGACAATGAATGTCTAATATTTAATGAAAATATTTTCGGCTCTCTTTAGCCTGCC  
AAAAATAACGCAGCCTTCTGCGGCATCATTGAGATCAATGATTGACACTGTCTCCGCCATCTATGGCTCGC  
TCCTGTCAATAGGTGATGACAAAAAGATTTCTAACGCGATTCTCATTACCTCGTTATGAACAAAGTTGAC  
CCAATGCCAGACGAAAATGGGAGGATCAACTCGATTATGCAATCATTCCACTATGGAGTGATTGTGAAAC  
AGCCTTGAATCGTAGATATCAACACCTTTCTGCTGAAGAATCAGCCAAAGCTTCGTCCGATGGCCCCGAAG  
CCAGAGTCAAAGGCTGTTTCCAAAAACAATAATCGAGGTTTCGTTTTCTGTGTTCTGTGGCTAGTGGAAGAA  
ACGATCAAGTGACCCCAAAATGTTTATATTGCGGTTCCGAAGGCCATTCGATATTGAATTGCTCAGCATAT  
GCCGCGTTATCAGTACAGCAGCGGTTNGAGTTCGCTAAGGCGGCTCCTTTATGCATCAATTGCCTTCGGAA  
GGGCACACTGTTGCCAAATGTAAGGCCAAACAAGTGCAGAGTATGCAGTCGTTCTCATAACACACTGTTGC  
ATAGATACTCTGCCGTTCTAACACTCGAGCGTTACCACCACCCCTTGACTCCGCACAGGATCAACCATCGA  
CTTCACATGCTATGCATGCGAATGTGTCTGATAGTGTAATCCTAGCTACCGCAGTCGTTAGCGTTAAAACG  
AGAAGGGCGAGTTCGTTTTGGCTAGAGCTTTACTCGATTCTGGATCACAAATTAATTTTGTAAACAGACGAG  
CTAGCACAACGATTGCAGCTGCGTAGAGAAGAGGATAGTATCAGCTTACTTGGGATTGCTCAATGCAATA  
CTNAAGTAAGAAAGAAGATTCATACAGTGGTGAAGTCGCGAGTCAATTGCAGTGAGTTCTCGTTAGATTT  
GTGGATTTTNAAGACCGTTTCGGGTTACCAGCCTGACCATACGGTCAATGTCAGTGAGTTGGAATAATCCCTG  
AGAACCTGCAATTGGCTGATCCATATTTTCATAAGCCACAGAAGATCGACATGCTCATCGGAGCTGAGAC  
GTTCTTTGAGCTTCTGTCTGTCTGCGTCAGATTAAACAGCTGACAGCTTGGAACTCCTTCGAGTTTGCAAAA  
CGTCGTTATTTGTTACTTGAAAGACGCTTGTCTCGAGATCCCGAGGTTACGCGCATGTACTTGAAATTCAT  
GGAGGAGTATTTAACTTAAGGTCACATGTCTGAAATAGATGATCAGATTCCAAGTACTCCACACTACTAG  
CACGTCGACGCCGTCTCAAATTGCGTTGAATGACCTAATGGTTGGCGCGACTATTCAAGAGTAGCTGAAC  
TCAATTCTGGTTTTTTGAATGGTTT

>9\_rnd-1\_family-54\_\_LTR\_\_Gypsy  
TATATATATATATATATATATATATATATATCAAGTTCCTCTCAGTTAATACCTATTGCCACCTTTCCGCTA  
CCACCGCAGAGCTATAAATCAAGTTAATAACCCAACTTATATTGCCCATGAATTTGAGCCACATTTTAAAT  
GCAATTTTCTTTTTGAGTTCAATAAGATGTTCTGATGGTTCAATAAGATGTACTGTAGAACATTTTATTTAG  
ATTGGTTAAGAAAATCCCATAAGTTATGTGTCTTACTGCGCAATTGGATGGGGTCAAATTTCCAAGAATTTT  
TGTATACATGTACACACACACATTTCATGCGCATCTGCTGCGAAATCTGTCAACAGCATTGCGATTGCGATT  
GTTTTTTGTGCTGATATTTTAATTCAATAAGACACAATTATTGGTGTGACTGTTGAGTAGAGGTGGTGCGG  
TCTGTGCGGAATTCGAGAATTCTTAATTTGAAGTCCGATTTGTGTGCGCATTATCATTGTTTTTAGTTTACAC  
TCTATTGAAATTATTGTTGGTGACCCCGCAACAATGTATTTTGTAATTACATTACTTCTATGTATTGTAGT  
ATTGTTGAAAATTTTGTGTAATGTTTTCGTAGGGTTGTGTGCTACTTTTATTTCTTGCTTGTGTAGTATTC  
TGAGTTCGTGAGACGTACTGATAATTGTGGTACNTGTATTNAAGACATATATATTTTGANAAAGTTCTGTAG  
GCTATTGTGTTCTACATTGTTGTCTATTTAAAAATGTATTAATTATATTCTGTGAGAAGTCGTTTTTGGTCA

AATGTTGTTTAATATCGTGTCCAATTTCTTTGTGGTCTCTTGGTTAGTGCTCTGAAGATGGTTCCCGAGATT  
TAGCACTCAAGGTTATATCAGGCTAGACGCCTCTGAATTCGAAAATGTAAGGTGGTCCGAGTCAAATTTG  
GTGGAGGCTAACTCCAAACAGATACTAATAAACTCCGAAACTCAAAAACAAATAAACAGACTAACGGAC  
ACTATCAATAAAAATTATCAGTTCCCGCAAAGGCGATTTGGTTGACACTCCTCATTTATTCGAGACCCTGTT  
GGCAAGAAATAGAATACTGAACACAGAAATTCAAAATTTAGTACTCACCATAACGTTGGCAAAAGCAAG  
CATAGTAAATCCTACAATCCTTGATCATACCGATCTAAAATCACTTATCGAACAAGATACCCCAATAGTTA  
GCTTAATAGAAGCTTCTAAGATCAAGGTCCTTCAGTCCGAGAATATTATCCACATATTAATAGCCTACCCT  
AAAGTTGAGTTTAGGTGCCAAAAGGTCTCCGTCTACCCCGTTTCACACCAACAAACCATTCTGCGACTCGA  
CGAAGACACGTTGGCGGAATGCGAAAAGGATACCTTTGCAGTTACTGGATGCACCGTAACCTACGCATAAC  
ACCTTCTGCGAACGAGCACGGCGCGAAACCTGTGCTAGCTCCCTTCACGCGGGAAACATCGCCAACTGCC  
ACACTCAACCTAGCCACCTGAAAGCGATAATGCCTGTAGATGACGGCGTCGTGGTTATCAACGAAGCGAC  
AGCGCGCGTCCGAACAGATGATGACGCAGAGGTAACCGTCTCAGGAACCTTCCTGATAACTTTTCGAACGG  
TCTGCAACTATCAATGGCACAGAATTTGTAAACCTGCGCAAATCACTAAGCAAGCAGCCTGGCATCGTGA  
GGTCACCGCTCCTAAACATCATCGGACATGACCCGGCCTAAGCATACCACTCCTGCATCGTATGAACAT  
CAACAACCTTGCTATCAATTCGAGATTTCAAGGAGGAGGTAGTTGCGGCTGGCTCGCCTAAATTCTGGTTTCG  
CGATTGGCGCGGTCTGAATGTCGGACTAATTGGCTCATTTCTTCTTTCTGTTGCTAAGGAAAGACGAG  
CCTCCATGCAGATGCAGAAGGCGATTGACAAATACGACATGCCCCGAGGACGGCCATCATCCTGAGGGGG  
GAGTTAACAACCTAAGCATAAATATATTGCCCTAGCAACTAAGTAGCTTCGTATTAACAATGCTGACGCGC  
CAGAACTGAGTTCAGCGCTCTGCGCTAAGAACGGCCAGCAGCGGTAAGCTGACACTGCATGGAATGCTGA  
GTCGGCTTGCCGACCATGCTTTGATGGCGTGATGCATTGAGGCTTAGGGTATTTGTATAATTTGCTTGTCC  
CCTAGTTTTTATGTTTTATATGAGGCGCGCAACACATAAGTCGCCGAAATAAATATACTGCTCCGGCATTGC  
CGATAAAACATATCTTTCGTNATNTTACTGGACCAAGGCCAGAACATATTTTGATCAAGGGCAGCGCGGG  
ATCAACGCAACTTACCCAAGATAACATTGTGTTACATCGCAGAACATACATCAATGGATAACTTATAT  
>9\_rnd-4\_family-181\_\_LINE\_\_CR1  
TTTAATTTTCAAATTATCGCCTTTACTGAGACCTGGCTGAAGCCGGACATCTCAGACTCTTCAATTTTACC  
TTCAAATACACACTTACAGGTGTGATCGAGCTTCCCGNATCGGTGGAGGAGTACTTATAGCGGTCGAGTC  
TGCTCTTTCGTGCGAACGCATTGATCTTTCCATCTCAGAGATTGAGCTGGTGGCTGTAAGAGTTGTATTTG  
GAAGTTTTTCTATCTTTATTTTCATGTTCTTATATNCCTTNTATCTAACTTGTCCACCTATCAAACCCATNTTA  
ATGCTATTAAATCTATCTCCTCCCTACTTTCTGATAGAGACCTTTTAGTAGTTCTTGGGGACTTTAATCTTC  
CAGATGTCGAGTGGTCATCGCCATCAGACTCAAACCTTTCTGTTGCCGTCTTCGTCNAAACGAATTTATTGA  
TGGTCTACATGAAATGTCCTTACGGCAGGTTAATCGTGTGCGTAATTCAAGAAACAGATCTCTTGATCTTA  
TTTTCGTGTTGGATTCTGTTCAACAGTGTTGTGCACAGGATCAATCCGCTTACGAATTTTACCAGCCCGAGT  
CCCTATCAAGGAACCGGAATTAGCTGAACGTACGCGTTGTTTCCGAAAGGCTGATTTTCATAAGCTAAAT  
GATCTTATTCTGCAAGTCGACTGGTCCCAACTGTACAATTGTGCAGACATTGATGTTGCCATTAACTTTTT  
TATGATACCTTGTACTCGATTTTTTGATGTCTGCGTTCCTCTTGATCACCCAGCGAGGCCTGATAGGCCTCCC  
TGGTTCTCAAAGAACTTATGAGGTTAAAAACGTGAAGTCGAGGTGTTATAAAAAGTTTAAGAAATCGGG  
AAATCATTCTGATTTCTCCCGTTATGCAGTTGCCCGATCGAATTTTCCACTCAAAATTCATCTGTTATAA  
GGATTACCTTCGGCGTGTGCGCTTCAATTTTCACATAATCAGATGAGAGCGCGAACACTGATCCAGGCATA  
GCCGATCTGTTTCGCAAACCTTTTTTCAAACCTACTCTCCTCTAGGTATAATAAAAATCAGCCTTATCCT  
TATCAGTTACAGAGGTCAAACCTGCATCTTAAATCCCATTTATACCGAAAGTTTCGCTTCTTAGCGACCTTAA  
CACTATCAAGCCGGTTTACTCACCGGGCCCTGATGGTGTTCCTGCTTGCGTGCTTAGATACTGCGCCTGCA  
GCATTATGTAAACCTGTTTTTAAACCTTTTTGAATTGTCCGTAAACACTTCATCTTTTCCGACCATTGGAAG  
GAATCATACATTATCCCTCTCCATAAGAAAGGGAGTAAGTCCGATGTCGAAAACCTATAGAGGTATTTCCA  
AATTATCCGCTATACCTAAAGCTTTTGAGAGAATTATAACTTCTCAACTGCAACATTTATGTAGTTCTATTA  
TTTCACCTTCCCAGCATGGGTTTCGTGAAGCGTAGATCTACAACCACTAACCTTCTTGAGTTTACTTCGTTTG  
TAATTGATGGGTTTAAGAAAAGAATGCAGACTGACGTCATCTACACTGATTTTCAGTAAGGCTTTCGACTCT  
GTCAACCACTCCTTGCTGCTTCATAAATTATGCCTTCTCGGCTTCCCAGTCAATCTTTTGAAGTGGATTTC  
GAGTATTTGCGTGATAGAACCCAAAAGGTTNTTTTCAGAAATTCGTTTTCTAAACGTATTCTGGTGACTTC  
CGGTGTTCTCAAGGTAGTCATCTTGCCCCGCTACTCTTTACTCTTTTCATCAATGACCTTCCCTCGATACT  
GTCTCACTNTCGAGTATTAATGTATGCTGATGATGTAAAATTATGCCTTGCATATAAAAATATGGCATCAT  
GTTATCTCTTACAAGCTGACATTGATGCGTTTCAGGCTTGGTGTCTAGCCAACCTTTTAACTTAACTGCT  
CTAAATGTAAGGTAATGACCTTCTATAGAAGCCCTCCTCAATTGGTTTCTTACATCCTTGATAGCGTACCG  
CTCGAGCGTGTTAACAGTATTTCTAATGAAGTTAATGATCTAGGTGTCATCCTTGATCATAACTTAAATT  
CGACTCTCATGTTAAGACCGTGGTCAATAAGGCCAGAATAGTTATGGGTTTCATCAAGCGANGGTCGAAG

GAGTTCGACGATCCGTACACGACAAAAACACTTTATATATCTTTGGTACGACCTATTCTTGAGTATGCCTC  
ATGTATCTGGTCACCACAATATGCCATCCACCAGGACAGAATTAATCCGTTTCAGAAACAATTCTTGTTGT  
TTGCCCTTCGTGGTTTAAATTGGGATCCTCGCGTGCGGTTACCGTCATACTCCAGCAGACTTCTGATGATT  
AACCTTCCTTCTTTGATTAATCGTAGAACCATGTTGGGT

>160\_rnd-1\_family-137\_\_Unknown  
TTTCATTTTGTATTTTTCAGCCAANTCTGCCACGCCCATGGACAACATTTAATCAGCAAATGATCGCTATTC  
ATGGTACCTAGTTGACCTATATATCCTTGTTATTCCATATCATGGATATAGTCCTAGCGAACCTAAAGGA  
CNAAGTTCTCGCAAAATGCGTAGGAACAGGGTCCAAAAATATGTATGCTTTTCTTTTACAGCCGCCCCAG  
CAACAGCCCCGCCCTGGATGGTTTCTAGTTGACTAGCATATCCTTGTTTATACCATACCATCGATATAG  
TCCTTGGGAACTAAAGGATCAGATCCCTGCAAAATGTGCATTGAAATGGTCCAAAAACATGTATGCTTTT  
TCTTTACAGGAGCCCTTTTACATTAGCTGCAGCTGCAGCTGTTGTTTAAACAGCCGGCTTACAGCGCTCATTTT  
ACATAAACTGCTANTTAACAGCACTCATTTTAATTGAGTTACATTTTGGCCCTTAATGCTATGCAATGAA  
AATTTTATTCAAACCACTCGTCGACCTTCTGGGCATTTCTGTTTCGCTGGTATTTGAGTGGAATTTTAGGG  
CAAATTTGGGGCCAGCCGCCGACCAGGGCGCCCCCTTGNGGGTATGCAATGAAATTTTTCGGCCGCTAAA  
AATATTNTTCGTGACCTTCTGGGCATTTCTGTTTCGCTGGTATTTTGGCGGATTTTAGGAAAAATTTGGGC  
AGCCAGCGGCCGCCGACGGGCGCCCCCTTCGGGTATGCAATGAAATTTTNGGCACGCTAAAAATATTTT  
TTGTCGACCTTCTGGGCATTTCTGTTTCGCTGGTATTTTGGCAGATTTTAAAGAAAAATCTCGGCAGCCAGC  
GGTTGCCAACAGACGCCCTTNCGGGTATGCAATGGATTTCTAAAGACCGTTGATTTTGAATTTTAAAT  
AAAAAACAGGAATTTCTCTTTTATTTNAANTAATTGATTTATTTATGTTTNAATTTATAAAATTTGTTGTTT  
TTATGCTAATTTTCTTAATTATTTCTCTTAAATTTATACAAATCGAGCATAAATTATAATTTTAGCTTATTT  
AACTTAAAATAACTATATCTGGCTTAATTAAAGTCCGATCCTGGAAAAATCTGCTTTGTCAGTCGTGGAG  
GTCCTTAGAGCTCATTGTAGTCCTTAATTTGTCAGTCTGAAAAGATAAAAAACACATTTAAATTAACATAT  
AGAAAATTATATAAANGCGGAAAAATAGGCCATAACTCGGGCATGTCCTTGACAGATTTTCAAAGGACATGG  
TGCCTTAGGATCGTATAGACCCCTGCATCGATCTGCATCANAAAAATATGGGGTTCATCTAAGAATCATA  
TGACTCGAAATTGGACTTGTAATAATTTTCNGTCCCGGAGCGCACGGAAATGGCCCGAAAAACACAAATCCTT  
GAATATCTCCAAACTACAAGGACGATCTTAATGAAATTTGGCCAGTTGGTAGTCCTGGTCAACACAATT  
ATTTTGACATATGACTCGCCAGGATACGCAAGGATATGGTCGAGTTATGGCTTATTTTCTTCAAACAAAAT  
CGTCCTTAAACTTTTTTGTCTGAAGGACTTTTCGTCTTTGGGTTGTAAATTTCTTNAATGGGAGGGCGAGG  
ACTATCTACTGGCCAAAGGACATCCCGATAGTCCTTCAAATGGCAAAGTTAGCCCGGAATTTTTCGATTTT  
GGCCAATTTTGGGACTAACCCCTAGGANAAATTTTCGATGAAATTTTTTGTGCAATCCTGGAAATCCTTGA  
ATGCCAATCGATAGTCCTGCTCCCCACGAGTTCAAANGGTATATCCTTCCGATATCCTTAAGGATTTGGC  
CGAGTTATGGCTAATTAAAAAATGTCCTTTTTAGAAAAATNGGCCATATCTCGGAAACGGCAAGGACGATT  
TTGTTGTCCTTTGGACAGTTTATGGTCCTTGTTTCATACGATTTGTTTGACACAGGACTTGTGAGGATCCGCA  
AGGATACGGCCGAGTTATGGCTTTGTTAATTTACGAAAGAATTGTACTCATATCTAGGCTGTCTAAAGGAC  
TTTCGTCTTTTTCATTATATATTCTGAATTGGGAGGATGAGGACTAACGGTTGGCAAATGGACATCATGAT  
CGGCAAGGATACGGCCGATCTACAGCCTTTTATCTCTACAGACAAAAATCTCTTTTCCTCAGCTCCTTGAA  
GGATTTTCGTCTTTTATTACATATTCTAAGTTGGCAGGACAAGGACTACATGTTGTCCAAAGGACATCA  
GAATGGTCCTTAAGGTGGCCAATTTAATGTCCTTTAAAAAGACAATNCCCATATCTCGGACGCCATAAGG  
ACGATTTTGATGTCCTT

>Ref\_dvir\_620  
CATTTAGAAAGTATCCTGCAGTGAGAGCGCTAAAGTCATTGGGATCAGATGATAGCGGTGACAGCGGGCG  
AGAGTTGAGTACTGCTTCTATCTCAACGACTGCAGTGTTTCAGCTTCTTTGCGCTCTTGACAGCGGCCTCCC  
AAAGTGTGGAGCCCTAGGTGGAATGAAATGAAAGGTTATCTCTTCAGAGGAACAATATGATAGGATAGC  
ATCTTGAGTGCTAGTGTTGAACATGAACCTCTTTAACTCGAGTAGCTTGTTGGATGCGTTGTCACAATAGA  
TGTGCGATACTGGTCCGGGCAACCATGCGTTTCAACGATTCCAAAAACTTATTCGTTGAAAGATCTGACCG  
ATTTCAATGTGAACGGCCTTTACGGCCATGCAGACATATATGGCGATATAGGATTTTGTGGGACCCTTGCC  
ACGTATTCGAAGATAGGTGTTCACTGGACCGCAGAAGTCGACTCCAACGTGGCGAAATGGCTTGTCTGTG  
GATAAGCGCTCAGGTGGCAGGGAACCCATGACTTGACGAAGTAGAACTGGACGATATCTGACACAGTGT  
ACACAAGAACGAACAATGCTGCGTGCTAAAGCTCTTGCGTTTATGACCCAGAATTGAAGCCGCAGCAGTC  
CAACTAATGCCTTTGGTCCTGCATGGTAATTGCGCAAGTGAAGATGCCGAACATAATTGTGGACAAATTG  
CGATTCCTTGGGAACAAGTAAAGGATGCCTTTGACGAGAGGGGATATCAGCATGCTCGAGTCTGCCGCCA  
ACTTAATGAGCTCGTATCCAGAAGAGTCATCTATGAAGGGGCTGAGAAATTTTCAGATTGCTTTTCAAATCT  
CTTTGTTTTCCTTAGCAATTGCAAATCTTCCTTGAAATAGTGCTGTTGGATGATCCTGATGATGGTGGCGAA  
GTTCTTCTGGGCATGGCGGCCAACTTTCGACAGGGTGTTCTTTTGGCAATATGGTAAAACCGGAACATA

TATGCCATAACTAGCGCCCGAATGTATGAACTAGTTCGGTTCAGCCAGTCCAGAATAGAATTCTGAATTGA  
TGGCAGGGGCCATTGAGTCTCGGAATCACGCAGAAAAGCAGGTCCTGTAAACCAAATTGATTGCTGGAGCT  
CATTAGCTGGGCATCCACGTGACACGATGTCAGAAGGGTTCAATTTTGACGGTACATGTCTCCACTTTCCA  
TCTGCTGTTTGATCTTGTAAAATGGATACTCTATTTCCAACAAAGTCGACAAGGTGATAGAGTGTGTTGC  
AGCCAGTGCAAGACAATCTGCGAATCAGACCAGAAATGCGCGCTGTGCGGCTTGCCGATGAATATGTTTT  
TGACAGTTGTATATAACTTACTCAGAAGTTGAGCTCCGCTTAACTCTAATCGAGGAAGCGTCAGCTTCTTG  
ACAGGAGCCACCCGAGATTTAGCAGTCAGAAGCTGAACCTGGACATTGCCATACGAGTCCGTGGAACGCA  
CATATACGCAACAGCCGTAAGCACGTATTGATGCGTCACAGAAAGCGTGACAGTTGTATGTCTGTGAGCTC  
AGCTTGCAAGCATACAATTTTTTGGGTTTAAATTCAAATAGTAGCACATCACGACGTTGATCCCAAGCTAC  
GCCAAGTGCGCTAGTGACAGCGTTTTTCATCCAAGTTTAAATCCTTTACCGATTCTGTCGTTTCTGACGGCGG  
GATGATTGGAGTGCCACTTAACCAATGGGAAGTGTCTCGGCGAAGTATCTCGGTGACCTCGTGTGTTGATG  
TTCTGCAACTCGATGAGCTCGTTTGCTCCGCATAGCAGATCATCAACATAAAACGATGATTTTACAATGGA  
TGCGCCAATGGGAAACTCGTTAACATGCAGATCTGCCAGATATTGCAAACCTGCGAACTGCTAAGTATGGG  
GCCGAGGCCGTTCCATACGTCACTGTATTTAGCTCAAAGGTCTGCAAATCAGCATCAGGGGATGCTCTCCA  
AAATATATATTGAAATTTCCGATCCACTGGGCTGACTAAAACCTTGCTCTATACATTTTCGTAATGTCCGCTG  
TGATGGCGTAACGAACCAATCGAAAACGAAGGAGAAGTATATACAGATCTTCTTGAGTGTGTTGGGCCAAC  
GAGAAGCAAATCATTCAATGAATGCTGGGACGATGAAGTGCACGAGGCGTCAAACACGACTCGTAACTTC  
GTGATGCACTGCTGGGTTTAAAAACACAATGGTGAGGTATATAAAAGTGTGGCTCACTTAGTTATATGGC  
CAAGATCCTCATATTCTTTCATGAAGGTTACATATTGCGATTGAACAGTAGTCTGCTGACTGGAGGCGACT  
CTCGAGCGATTAAAAACAACGACATGCAACATCG

>160\_rnd-5\_family-1391\_\_LTR\_\_Gypsy

TTTATATATTAGCAAATAGGGATGCAGNACAGGCCTANTGTGGCAACCTAGTGCTCGCTNGTGAACACAA  
TAGAGTGAGCCCGACTTTATGGCAGTGGCTCGTAACCAACCAGGAGCGGCGTGAGTTGCCCTGATTAGG  
CAAGTCCAGAAAACATGTGTAGATTTAGTTAACGTATTGTCTCGATAGTGGGTCTGTTATCCAGAACTACT  
ATAAAGATTTGACCAATATCATCTAGGTACTATTTAGAAAAGATCACAATATTTTTTCATTTAATGTTGAGG  
CCTTGGTAACAAGCACCTGCAGTTTCCGCATTCTCTTCTGGAGCTTGTTTACCTCTAATATGTTGCGCGCCT  
AGCACACCGACTTTGGTCACAGGTCATTGAAGGATCTCGATAGCTATCCCGACGACTGTTCTGATTTGTCTC  
CTTGTCTTTTTCCAGGATGGTTTGCTTGATAATGATCACGTTTGCTTACAGGACGATGGAGGTGTTGTTTG  
ACAAATCACTTCATGTACCGCGCAAGATCACGCACGTATTCATACACCCAATATGGCCAGAATTGACTGA  
TGAACAGTTGTCTGTCTTCCGTCGTTGGTACCTAATAGCAGCTGCGAAATTCGGTGGTGCGTGCGCAGCAA  
CTTTTATAAATTAGTATCCAGTAGCATATAAGCTTTTTTACCTGAATAATATAGCTCACACCTGTAAGTTAT  
GTGATTTTTTTCAATTGTAGATGTTGATGTATATTCAGACCCTCGTCACAAGTGCTGAGATTGGTAAACTTG  
TAGATTATGTTTCGGAAAGCAACTAGCCTTCCAAATCACTGGCCTTGTTGGCTCAGCAATGAAACAACCTAGT  
AACGGACTGATAACGGCAAGTGCCGGAGCAGTATATTTGAAGAAGTTTGTTCTACAAAGTTGGNTACAA  
AACCAAACCTAGAAATTAACCAATTGAATTGGATCTGAACCCTAAGGCTAGGCGCATAAGTCTTAGCTGCTA  
TATCCGGCAAGCCGANTGGGCATACNCCAACACTGTCGCTTGCGGCATAGGCAAGTGTCAGGTTACCGCT  
GCTGGCCGCAAGTGGCCGGGCACTGAACTCGTAGNTCAGCAGAATGTCGCGAGTGTAAGCAAAGTGCAGTGC  
AACATTCTTGCGTTCTTATAAACAACAAAGTGTGTTCTTATGACATAAATATGAAGTGCAATTCTTATGTGTT  
GACCTACTCCTCTCTCAAGCTTTTGACCGTTCCCGGTTATTTTATAGCTGTTAATGGTTTTTTATTCCACCTTC  
TGTACTTCCTTCGATGCTTGCTTCTCTTTACAATTTGCCAAACGATGTGAAAGCCAATGCCAACGACACT  
GAGGATGATGCCTGCTGCAATCCAAATCTTATGAGACCCAGAGGCCTTCAATTCGTCCTCGAAACTTCTGA  
TGACGCGCAAATTGCGGTTGTTTCATCCTTTGTAGTTGGGGCATGCTTAGCACTGGATCGTGGCTGATGATG  
CTGAGTAGAGGCGACCCTGCCACTTCTGGCGATCGGGCTAACATCTCGCGCTGGTTTACATATTTTGTGCC  
GTTGATTATGGCCGAAGAGAGGAATGTGGGGAGGTGTGTCCAGTTTGTAGTAATCTCTGGACTATCGTCT  
GTGCTGACCTTGGCAGCACTCTCGTTGATAATGATAATACCGTCATCGACTTGTGTGATGGGCTTTAGGTG  
GTGCGTGCGGCAAAGGGGCTGTGCTGCCGGCGTCTAGTGCTTGTGCGCAGGTGTCTTGCGCTGCCAATTTAC  
AGACGGCGGCGTAGGTGCTCGTTACTCATTGACCGCTAGAATGTCATCGTCGCATTCGGCTATGGTA  
TCATCTTGATGCTGTAGTGTGACGTGTTGGTGTGCCACCGGAAAGATGGTGATTTTCTTGCAAAGAGCTT  
GACCCTGGGATACGCTATTAATATATGGACAATGTTCTCGGACTGGAGGACCTTGATTTTAGACGCTTCGG  
TTGGGTAACTATGGGAATTTTCGACAGGATGTTTATTTATAATTGATTTCAAATCATCGTGGTCAAATATT  
GTGGGGTTTATTATACCCGCTTTGGCTAGTGTAATTGTAAGTATCAAGTTCGATATTTGATTTATNAGTATT  
ATATTTCTTACTAATAGTGTTCATATAAATGCGGTGTGTTTACCAATTAATTTCTTTTACATTTAATTATTT  
CGTTCACCGTGTCGGTGAGTTTGTTAATTTGTGTCTGTGTTTGTGTATTAATGACTACCTGCCTATTGTTTCG  
CATCAATCAAATTTGACTCGGACCACCTTACATTTTTCGAATTCAGAGGCGTCTAGCCTGATATAACCTTGA



GTGCTAAA  
>Ref\_dvir\_967  
GTCAAGCCAAGAAAACGTTTGAACACCTTTTTTATCGACGGGTATGGGAAAAGGTGACACCGCCTGCGTT  
TTCCAATCACTTGGTTTAAATAGTACCGTTTTCCAAAATGTACGCTAAAAAATGCATCTTCTGCAAAACCTA  
ACACTGGCTCCAATTAATACGCAAGCCATTTCTCGCTGCCCATCAAAACTCTCTGCAACTTTTGTAAAGCCT  
TCCTCAACAATAATGCTTGAAATGACAATATCATCCATGTATACGACTGCATTACCATTATCCTAAGTTCA  
CACTCCAGATAAGTTTGAGATACCAAATGGTACAAAAAACGCATACTGCACTTTCTGCATTACAAAAGAT  
GTATATTTCTGTGACTGTGCCTCGATTGGTAGTTGAAAGTATCCATTCGTCAAATCCAATGTAGTAAAAAT  
CAGTGCTCCCTGCAACTTGTCATAAACACTGTCCATTTGCCTAATCGAAAAGCTATCGCGCACTATCTTTT  
CATTCAACCTGCGAGAATGACAACATTGCCGCTTTTAAACGTTTTTTTTTTTGTACCAGAAAAAATGGGTAA  
GCATATTCGGATGTTCTGGGTTTTATAAACTTATCCGCAAGCCACTATTGATCTTAATCGTATGCATCTTTC  
TGCTTACTGAGCGCTAAGCGCCTCGGATGCTGGTGAAGTGGTATCTCATTCCGTTAAAACTATCTTCATTT  
CTACGGGACAAGTGACACTTTTCTTCAGACTATACCCAATTATCATCCTTCTCACTCTATTTGACTGTGTCT  
GTGCTAAACCTGACAGGAAAACCTCCTCACCTGCCTCACTTTGCTCTGAGCTCAGCATACATTGGATTTTG  
AATGCATTATTTAAATCGGCGCTTGAGCCCTGAGCTTTCTGATTACCATAGCTTTAATTCCTGTATTCACCT  
TTGCTGACCAATCTGCGTACAAACTCTGTTCCATGCTTGGTCACTTTTCATATCGATAGTTTCCAAAATCTTT  
CTGCCCCAAAAGATCGTCAAATGCCATGCCTTCATCGGAAATGTCATGAAACTCGAAATACATATCGATTTT  
ATCTATCTGCACTGGGATTTACAAATATCCAAATGGTACTACATGACTTTCGCCAATGCCGGTCAAAAATT  
CTAAACACGATAACTTGCCACCCTTTGCTAAAAAATTTTCGGCGCAGCAAAATCTGCTCCGTATCCACAAGT  
CCTTTAAAAAAATAAGCTGCTCTATGCACTGGTTGGTAAGGGGTAAAAAACTTGCTGGCTTTATTTTTCT  
CTCATCCTGAACAAGATTTGTTCCCTTATCTTGCTTTAGATGCCCGTCCATTTTGCCTGAGCGGCTCTATG  
CACTGGTTGAGTGCAACGAAAACACTTGAATCCAGTTTGCGTAAATTGATAGATCACCACACTTGAAAGA  
TTTCCTTACTGGTTCCGATGTTTTTCTGCGACAGTCTCATTTTTGCCGACCTGCGAGTTATTTTTATCATCT  
AGCTTTAACGACCCTCGCATCTCTTGGTACCCTTCAATCTTCAACTGCCTAGTTGCTCTGGTATCCGGTATA  
CCATCTATGAAATATTCAATTAAGCTTTCATCTTCCAAATCTATCGGCTTCGCTATCTCCATCTGCGGATGA  
AAATATTCATGCAGTGTTTCGCCCTTCTTCTGCTGACGCCTGCTAAGCCTACTCATCGTACAATGCAACTTT  
CAACGTACACCAATCGAGAATATCTCGTTGGCTGGGTATAAATAATTTCCGCCACACCAACGAGTAACTGC  
TCTGCATAAAATGAACAACTGCAACTGGCTCCAGTCTACCTCAAGTGCACGTTCCCTCAAGTTCTTTAATCCA  
CTGATTTATGTCTTGGTTGTTTCGACCCAGAGAATTGTGTACACTACCCTCGACATCCTTCAACGTGAACC  
ATGACCTAGCCGGTTCTGACCTACATCACAAGGATTTCTACCCTGCGCGATATATATTGCTTACCGTTATA  
AATGAACCCTCATCTCCATCAGCACAGTTTTCTTGATCATAATTAAGTGGAAATCCATATTGAGGAAGCAG  
CCTACATTGCAATTCACCTTTTCTACCAAAAATCGCGTCTCTACTCATTTTACAACATATATTATTTAATGTAA  
ATGAATTGAAAATAAGTATATGAGAATTAAATTAAGTGCCTTTAAGCTTTTGTTCAAAACCTTATTGCTGGT  
AACTTTAAAAATATCCTCAACATAAAATACAAATGTTACTTACAGTAAGTCAATAGCAAATACAAAATTA  
ATTTTCGGTTGTTCTCCTTAAATTTGTCTCCCCGATATCGCGAAACTCA  
>160\_rnd-1\_family-338\_\_LTR\_\_Gypsy  
GGAAACGCTAGAGACCTTACGTAGGCGGTTTTACTGGCCCCGGCATGGTTNGTCAGGTAAGGGATTGGGTG  
AGACGATGTGTGACATGCAAGGAAGTCAAGGCACCGAACTTTCCGATGCAAGTGGGTCTAGGAGAAGAG  
GTAGTGACCGAGCGACCATTTCAAAAACCTATATATTGACTTTCTGGGAAAGTACCCACGTTCTGAAGCAAG  
GGCACGCGTGGATNTTCGTGGTAGTCGACCATTTTTCAAAATTTACTTTCTTGAAAGCGATGCGGGAGGCT  
ACGGCTCTTAACGTGGTGGAGTTTTTGGTCAGCGAGGTTTTTTATAAGTTTGGAGTACCCGAGGTCATCCA  
CTCTGATAACGGACGACAGTTCATATCCAGTACGTTCCAAAACATGATCTCAGCTTTCAACATCTCGCACA  
TACGCACCGCAGTCTACGCACCACAGAGCAATGCGAGCGAGCGAGTTAATCGTACCGTGTTGTTCGGCCAT  
CCGGGCGTATCTAGAGCAAGATCACCGCGAGTGGGACCTCTACCTTCCGGAAATAGAAGGTGTCCATACG  
AAATGCCATACACACCGCGACCGGGGTGACCCCTTCTTTGCCGTTTTTCGGACATCATATGTTTCTTAACG  
GGGCATGCTACAGATTGGCTCGTAGGTTGGCGTCTCTGAGTGATCATGAGATCTCCCATTTGCACCCNGCG  
GACAAAATACACCTGATTAGACGGCGAGTCCAAGGCCAACTACATCAGGCTTACGAAAGAAGTCAGCGG  
CAGTACAATGCTCGAGCCCGGGTGTTCAGGCGGAACCCGGCCAAGAAGTTTACCGACGCAATTTTGTGC  
TGAGCGACTTTGGGAAAGCTTTNAACGCCAAGTTTGCAAGAAAGTTCCTTAAGGCCAGAGTAGTGCGTCG  
AGTAGGCAACAACCTCGTACCTGCTGGAAGATTTGAAAGGGAAGCCCTTAGGAGTGTTCCATGCGAAGGAC  
ATACGGGTGTAGATCAGGGTCGTGGGTGTGGCCTACGTTGGGCGTTCTTATTTGGCCGGCTGGGCGAACC  
GGATAGGANATGCGCACGCAGATTTATAGTAACGGTCGGGTTTCGCGCTTACAATAATCTGCGTGGCGATG  
TCGCATTTGACATATCGACGACATCGATATTGCCCGTAATTGGTTGCGTTCTTTATTATCGGCCGCGCCGA  
TATCTTTGGTCATAGGGGCAGAGTATCGGGGTGAAGCCGGACACACAACGGCGCTTAAATATCGAGGAG

TGGCAACACCGGACTTGCGATCCACGACGCCAAAAGAGGGCGATTGCTATTGGCTGCCCGATTTCGCNCCCA  
AAGAGATAAAAGAGAGAGTNGATCGCATGAAGATGCCCTTGGCCGTGNTTCGAGCCGTTGACCCAAAAA  
AAGAAAAAAGGAAGAAAAAGAACAGCTGTGCCGATGAGCAGCAACGGTAACCATATTTAAATGTACGC  
GGGTNCCGAATTTTCGGCACCTTTGATGTGCTGCCCAATGTACAGCGAGGGAGTTGCACTTTGTACAGCGGTC  
CACAGCGGACGTACCGGCTCGCAGTTAGCATTTTTGAAGTTGGATATATGTTTTTTGCCGGCCACGGAGCA  
TGCCTTAAACAAATCAAAGCGCATAACATTTGTTTCATGACGGGCTTTCTTTATTAGTTAATTGACAAGATA  
ATTCCTTATGTGCTAACGTACTGCAAAGAAATAGTGCACAAGAGCGATAATACACGAAGCAATAATACA  
CTAGAAACACACTGTCGTCATTTAAAACCACTATAAAAGCGATACTCTATTAGAGCAGCCGCAGCGATT  
TGTGTACACACACGCTGAAACCCGCGCCGGAGGACGCTGGCCAGATCAACCCAGATATTCACGGGGCCGA  
ATTTTCAAGGCACGGCCAAGTATCGGCGTAATCGCGCGACGGAGAGACGAGCCATCACGGACGGGACTC  
NCACGACGAAGAGGCGGCCACGGGCGAGACCACGCCCATATCATCCGAGTGAGTCTGTTCCATTTTCGTGC  
CTCCTCGCTGAGTAAACGGCAGAGTCAGAAGCAGACCCCTCATTGTGCTCCCTGAAAGAGAACNGATTT  
TTTTTCGGAATTTTAACTCTAGTTTTTTTTTTGTTATTAAATACATAAAAATACTCACGACTAGTCTAAATT  
AAGTAAATTTCCGAAAGTGCGAACNGGGAAGGAAAGGGCCCAAAGATTATTGCGTCTGCCAAGTAAGGA  
ATGAAATTAATAATTTAGATTTTGGTCAACTTATGCACGAGTGATACCCACNTATACGTATATATATATAT  
>160\_rnd-1\_family-59\_\_Unknown  
AAACTAATATATTTTTTCATTTTGTATNTTTCAGCCAAATCTGCCACGCCCATGGACAACATTTAATCAGCA  
AATGATCGCTATTCATGGTACCTAGTTGACCTATATATCCTTGGTTATTCCATATCATGGATATAGTCCTAG  
CGAACCTAAAGGACCGAGTTCTCGCAAAATGCGCAAGAACATGGTCCAAAAATATGTATGCTTTTCTTTT  
ACAGCCGCCCCCAGCAACAGCCCCGCCCCCTGGATGGTTTCTAGTTGACTAGCATATCCTTGGTTATACCA  
TACCATCGATATAGTCCTTGGGAACCTAAAGGATCAGATCCCTGCAAAATGTGCATTGAAATGGTCCAAA  
AACATGTATGCTTTTTCTTTCAGGAGCCCTTTTACATTAGCTGCAGCTGCAGCTGTTGCTTAACAGCCGGCT  
TACAGCGCTCATTTNACATGAACTGCTANTTAACAGCACTCATTTTAATTGAGTTACATTTTTTGCCCCTTNA  
TGCTATGCAATGAAAATTTTTATTTCGCAAAAACACTCGTCGACCTTCTGGGCATTTCTGTTTCGCCTGGTATT  
TNAGCGGAATTTTAGNGCAAATTTGGGACCCAGCCGGCGACGAGGGGCGCCCCCTTNNGGGTATGCAATGAA  
TTTTTTCGGCAGCTAAAAATATTTTTTCGTTCGACCTTCTGGGCATTTCTGTTTCGCCTGGTATTTTGGCAGATT  
TTAAGAAAAATCTCGGCAGCCAGCGGTTGCCAACGGACGCCCTTGCGGGTATGCAATGGATTTCTAAAG  
ACCGTTGATTTTTGAATTTTTTAAATAAAAAAACAGGAATTTCTTCTTTTATTTTAAATAATTGATTTATTTA  
TGTTTAAATTTACAAAATTGTTGTTTTTTATGCTAATTTTCTTAATTATTTCTCTTAAATATACAAATCGA  
GCATAAATTATAATTTTAGCTTATTTAACTTAAATAACTATATCTGGCTTAATTAAGTCCGATCCTGG  
AAAAATTTGCTTTGTTCAGTCGTGGAGGTCCTTAGAGCTCATTGTAGTCCTTAATTTGTTCAGTCTGAAAAGA  
TAAAAACACATTTAAATTAANAAGGCAAAAAATATATAAAGGCATTTTATGTGAAGAGAAAAANGGCC  
ATAACTCGGCCATATCCTTGCAGATTTTCAAAGGACATGGTGC GTTAGGATCGTATAGACCCCTGCATCG  
ATCTGCATCAAAAAANTATGGGGTCATCTAAGAATCCCGGGACTTGTATTTTACTTGTAATAATTTTCAGTC  
GCGGAGCGCACGGAAATGGCCCGAAAACACAAATCCTTGAATATCTCCGAACTACAAGGACGATCTTA  
ATGAAATTTGGCCAGTTGGTAGTCCTGGTCAATACAATTTTTTTGACACATGACTCGCCAGGATACGCAAG  
GATACGGCCGAGTTATGGCCTATTTTCTNTTGCAAAAATCGTCCTTAAACTTTTCCGTCTGAAGGACTTT  
CGTCCTTTGGGTTGTANATTCTTNAATGGGAGGGCGAGGACTATCTGCTGGCCAAAGGACATCCCGATAG  
TCCTTCAAATGGCNAAGTTAGNCCCGATTTTTTTCGATTTTGGCCAATTTTGGCGACTAACCCCTAGGAAAA  
ATTTTCGGTGAAATTTTTTGTGCAATCCTGGAAATCCTTGAATGCCAATCGATAGTCCTGCTCCCCACGAGT  
TCAAAAAGGTATATCCTTCCGATATCCTTAAGGATTTGGCCGAGTTATGGCTAATTAATAAATGTCTTTT  
TAGAAAATTGGCCATATCTCGGAAACGGCAAGGACGATTTTGATGTCCTTTGGNCAGTTTATGGTCCTTGT  
CCATACGATTTGTTTGACACAGGACTTGTTCAGGATCCGCAAGGATACGGCCGAGTTATGGCTTTGTTAATT  
TACGAAAGAATTGTAATCATATCTNGGCTGTCTGAAGGACTTTTCGTCTTTTTCATTATATATTCTGAATTGG  
GAGGACGAGGACTANCGGTTGGCCAAAGGACATCATGATCGGCAAGGATACGGCCGATCTACAGCCTTTT  
ATCTCTACAGACAAAAATCTCTTTTCCTCAGCTCCTTGAAGGATTTTCGTCTTTTATTACATATTCTAAG  
TTGGCAGGACAAGGACTGCATGTTGTCCAAAGGACATCAGAATGGTCCTTAAGGTGGTCAATTTAATGTC  
CTTTAAAAAGAAAATACCCATATCTCGGAAACCATAAGGACGATTTTNATGTCCTTTGCGCAGATTATAGT  
CCTTGTC  
>9\_rnd-1\_family-226\_\_Unknown  
TTTCAGCCNAATCTGCCACGCCCATGGACAACATTTAATCAGCAAATGATCGCTATTCATGGTACCTAGTT  
GACCTATATATCCTTGGTTATTCCATATCATGGATATAGTCCTAGCGAACCTAAAGGACCGAGTTCTCGCA  
AAATGCGCAGGAACANGGTCCAAAAATATGTATGCTTTTCTTTTACAGCCGCCCCCAGCAACAGCCCCGC  
CCCCTGGATGGTTTCTAGTTGACTAGCATATCCTTGGTTATACCATACCATCGATATAGTCCTTGGGAACC

TAAAGGATCAGATCCCTGCAAAATGTGCATTGAAATGGTCCAAAAACATGTATGCTTTTTCTTTTCAGGAGC  
CCTTTTACATTAGCTGCAGCTGCAGAGCTGTTGTTTAAACAGCCGGCTTACAGCGCTCATTTTACATAAACT  
GCTAATTAACAGCACTCATTTTAATTGAGTTACATTTTTGCCCTTAATGCTATGCAATGAAAATTTTTATT  
CAAACCACTCGTCGACCTTCTGGGCATTTCTGTTTCGCCTGGTATTTGAGCGGAATTTTAGGGCAAATTTGG  
GCCGCCGNCGACCAGGGCGCCCCGTGAGGGTATGCAATGAATTTTTTCGGCCGCNAAAATTTTCGTCGACC  
TTCTGGGCATTTCTGTTTCGCCTGGTATTTTGGNAAATTTTAGNNAAAATTTGGGACCCAGCCGGCGACGAG  
GGCGCCCCCTTTGGGTATGCAATGAAATTTTTTTCGGCAGCTAAAAATATTTTTGTGACCTTCTGGGCATTTCT  
TGTTTCGCCTGGTATTTTGGCAGATTTTAAAGAAAAATCTCGGCAGCCAGCGGTTGCCAACAGACGCCCTTN  
CGGGTATGCAATGGATTTTAAANNCCGTTGATTTTTGAATTTTAAAAAAAACAGGAATTTCTCTTTTTT  
TATTTGAAATAATTGATTTATTTATGTTTAAATTTATAAAATTGTTTATTTTTATGCTAATTTTCTTAATTAT  
TTCTCTTAAAATTATACAAANCGAGCATAAATTATAATTTTAGCTTATTTAAACTTAAAATAACTATATCT  
GGCTTAATTAAGTCCGATCCTGGAAAAATCTGCTTTGTGAGTCTGGAGGTCCTTAGAGCTCNTTGTAGT  
CCTTAATTTGTGAGTCTGAAANGATAAAAAACACATTTAAATTAACATANACAAATAATATATAAAAGCG  
GAAAATAGGCCATAACTCGGGCATGTCCTTGCAGATTTTCAAAGGACATGGTGCCTTAGGATCGTATAGA  
CCCCCTGCATCGATCTGCATCATAAAAAATATGGGGTCATCTAAGAATCATATGACTCGAAATTGGACTTGT  
AAAATTTCCGTCCCGGAGCGCACGGAAATGGCCCGAAAACACAAATCCTTAAATATCTCCAAAACACTACAA  
GGACGATCTTAATGAAATTTGGCCAGNTGGTAGTCCTGGTCAACACAATTATTTTGACATATGACTCGCCA  
GGATACGCAAGGATATGGTGCAGTTATGGCTTATTTTCTTCAAACAAAATCGTCCTTAAAACCTTTTTTGTG  
TGAAGGACTTTCGTCCTTTGGGTTGTAAATTCCTTAATGGGAGGGCGAGGACTATCTACTGGCCAAAGGAC  
ATCCCGATAGTCCTTCAAATGGCAAAGTTAGCCCGGAATTTTTCGATTTTGGCCAATTTTGGGACTAACCC  
CCTAGGANAAATTTTCGATGAAATTTTTGTGCAATCCTGGAAATCCTTGAATGCCAATCGATAGTCCTGCTC  
CCCACGAGTTCAAAACGGTATATCCTTCCGATATCCTTAAGGATTTGGCCGAGTTATGGCTAATTAAAAA  
TGTCTTTTTTAGAAAATNGGCCATATCTCGGAAACGGCAAGGACGATTTTGTGTCCTTTGGACAGTTTAT  
GGTCCTTGTTCATACGATTTGTTTGACACAGGACTTGTGAGGATCCGCAAGGATACGGCCGAGTTATGGCT  
TTGTTAATTTACGAAAGAATTGTACTCATATCTAGGCCGTCTGAAGGACTTTCGTCCTTTTCATTATATATT  
CTGAATTGGGAGGATGAGGACTAACGGTTGGCNAATGGACATCATGATCGGCAAGGATACGGCCGATCT  
ACAGCCTTTTATCTCTACAGACAAAAATCTCTTTTCCTCAGCTCCTTGAAGGATTTTCGTCCTTTTTATTAC  
ATATTCTAAGTTGGCAGGACAAGGACTACATGTTGTCCAAAGGACATCAGAATCGTCCTTAAA  
>9\_rnd-1\_family-453\_\_LINE\_\_CR1  
TTGCTTTTAAATTTTAAATAATTGTTTTTACTTAGCCCCGGCTAAATCCGGACATCTCAGACTCTTCGTGAT  
CGAGCTTCCCGTATTGGAGAAGGAGTACTCATAGCTGTGAGTCTGCTTTTTTCGTCGGAACGCATTGATCT  
TCCCATCTCAGAGATTGAGTGGGTGGCTGTAAGAGTTTCATTTGGAAGTTTTTCTATCTCTATTTCTGTTT  
ATGTTTTAGGTACCACTGCTAAAAGTGTCCCACTGTCCTACCTGTGGCGCCTAAGCCTCAAGTGGGTGTT  
CAACCGAAGAGACATATTTTTGTTTCTTGGCTTGCCCCCACTTTCTCATCAGATGATGGTGAAGCCTTTGT  
ACAGGCAAAAATTCAACCACAGGTAAAACGGTGNAGAAATTNAAGTTCGCCTATGGAAGATATATATTGC  
ATCCTTTATAATAAGTGTTCGCCAGAAATATTTACTAACATTTGTTTATAAGAGTCTTGGCCGGAACACT  
TAATAGTCAAAGAATATAAGGCCAAAAAGATTAATCGGACTCCGATTTTATTGCCACCTGGTTCTAGTGG  
CGCATCAACTTTAGTTGCGTCAAAAAACTAAATTCTTCTTTCGAGCTTGCCTACCAGAATGNTAGAGGTCT  
TAAGTCTAAGNTCGCTAACATGTATTTAGATTCTCTTGCNTTTAATTTTCAAATTATCGCTTTAAGTAACCT  
GAGACCCGGCTGAAGCCGGACATCTCAGACTCTTCAATTTTACCAGCCAAATACACCACTTATAGATGTG  
ACCGAGCTTTCCGTATCGGAGAAGGAGTGTAGTATGTGCATATATTGAGGGTACACTGTACCAATAAAGT  
AACATCGGTAAAGCATAAATATATCAGCAACACATTGTTGCAGTACATAAAACAAAACCATTTCAAGTGAG  
CGTGTAATATGATCACCCGCTTATGAGCTAAGCTAAGTTAGCAGTCCCACGCTGACCACTTGTAGCATATA  
TATATATATATATATATATATATATATATATATATATATATATATATATATATATATATATATATATAT  
TCCCGATACTGCTGATAAGACAAAATATGTATGAAGCCGCTCCGCTGCTGGCGTAACCGGCAGCGCAGCT  
ATGCGGCCCTAGGCATAAGAATATATTGAATAAAACATTCTAAAAACTAAATTCAAACGGCACAGACGTG  
CCCGTGTATTAAACTATTTGAATCTATCTCATGGCGACCGTGACAGTGGTTTTGGTAAGAGGTTCTAGTCG  
GGGGCTCCCGACTAGGGGATACCTTGAACCCTCTTCTTCCAACATCAAATGCATATATATATTTTTATTTT  
GAAGCTATATGTCAAGTTTGGTGACTTTAGCTCTTATTATTTACCAAAAATTGCCCAAAAACAGGATATCGA  
TATCGATAAATTTTTATCGATTGCTTGGAAATGGAGTAAGTTAGCGATTATCGAAAATAAACTCGATCTGC  
GCGGGAAGTACGGGCACTTACATTTCTGTTCAAATCGTTCAAATTCTGAATCTGAATTGTCTTTTGGTCATC  
TACATCATCTAATTCTCTGGATGCGTTAACTAACTCCTTTACTAATGTTGGCAATTGTTACGCCAAAATTTG  
GCTTACTGTGGCTGTTATTATCTGGTCAAGTCTCTATTTTGTAAAGCCAAGATGTCATTATTGTAGTCTGTTT  
TGCTATGTCCGCTTTACTGGTATTTGTCTACTTGGAGATCTAATCAAATTACGTTTCATTAGCCATTAAATTT

GTGTAAGTTTGTGTTTTATTCTATATTTTCTCTTGATTGTTTTTCATTGAAAACCAAGTGGCTTCCTTTTTTTCTT  
TGGAGGGTCTCTTACGAATCGTAAAGCTTAAATTTCTGTTATGCTACGTTTGTCAATTTTTATATTTCAATTATC  
GTTTTAATCTTACATATTTTCTTTTTTTCTTTTTGTTTTAAAATATTTGCATTGTTGATAATTTTTCTTTAAA  
CGCTGAACCCATTAAAANCGGGCATAAGGGTATATTGTATTTGTGCAAAACCCAAATGTATGTAACAGGC  
AGAAGAAAGCATCTTCGACCCCAACAAAGAACACATATTCTTGATCAGCATCAAGAGCCGTGTCGTTTCATG  
CCATGTCCGTCTGTCCGTCCGTCCGTCCATCCGTCCGTTTGTATGAACGCAAGGATCTCAGAACCTATAAG  
AGCNAGAGCTTGAAATTTTCGATGTAGGTGCTCCTAGTGCCCGCGCAGATCGA

>Ref\_dvir\_424

CCTTTCAACGTTGCATGAACAATGTTTTACGACCGTTACTAAATAAACACTGTCTGGTATATCTTGATGAT  
ATAATTGTATTGTCAACATCCTTAGAAGAACATTTGCAAACCTTGCAAAAATCAAATTAGCTTTCGAGAAGC  
TTTCTGAAGCCAATCTCAAATTACAATAAATGCGAGTTTCTAAAACAAGAAAATTCATTCCCTAACTA  
AGGATGGAATAAAACCGAATCCTGATAAAATCAAAGCAATTTAGAAATATCCAATTTCCACAAAAACTAA  
AGAAATAAAAGGTTTTCTTGATTACTACAGAAAGTTCATTCCAAATTTTGCAGACATAGCCAAATCAAT  
GACAGCAATGCTTAGAAAAGACTCAAAAATCGGCATTAAAAATACTGAATACATTTAAGCTTTTGAAAAA  
TTTAAACAATAATTTCTAATGACCCAATTCTAAAAATTCCAGACTTTAAAAGTAAATTCGTTTAAACCAC  
TGACGCAAGTAATGTAGCTCTTGAGCAGTACTCTCTCATGACGGACATCCCATTGTGTTTTATTAGCAGAA  
CTCTCAATGACCACGAACTTACTACAGTGCCATAGAAAAAGAGCTTTAAGCCATTGTATGGGCAACAAA  
ACCTTTAAGACATTACCTACTAGGACGACATTTGAAATCTATAGTGACCATCAACCATTATGTTGGCTGT  
ACAAAATGAAAGAACCAATTCAAATTAGCCCGATGGAGAGTTAAAATATCTGAATATGACTTTGACAT  
AAAACATATAAAAGGAAAAAAAACACATAGCTGACGCTCTATCACGAGTACAAATAGAACAGACTTA  
TTTCGGAGAAGAAACACAACATAGCGCTGACGAAGACAATAGTAACTTAATATTCACTTCAGAGAAACCA  
ATAAACACATTTAAAAGACAAATTATATTTTCTAAAGGCATTCCAAACATAAAAAAATAAAACTACTTCA  
AAAAATTTTAATTCACATTACATACGATAACATGACTAAAGATAATAATAGACCATTTTTTGACAAAAAC  
CAGTGCAATATTGATAGACAATGATGCAGATTTTGAAATAATTCAAACGCACACAAGGAAATTATTAAT  
TAGCCAAAATTCCTCGAAGTCTTATTCAATTAAAAAACATTAAGTCTATGCCGAATTCAAAGAAGCTTATT  
TTGAAAACCCATGAAAAATTCCTACACCCCGAAATCAAAAAACAAATAAACGTGAAACCTATTATTTCCC  
ATATATTAACACAAAAACATAATAAACAAATGTCATATTTGCAACTTAGCAAAATCAGAACATAGAAACAC  
AAAAATGCCAATGAAAATTACACCTGAGCCCTAACACTGTCGTGACAAATTTGTTATTGACATTTATTCTT  
CTGAATGCAACATTATCTTAGCTGCATGGACATTTATTCAAATTCGCTACTCTTGAAAATATTAAACAA  
AAAGACTGGATAGAATGCAAAAATGCATTAATGCGTATATTTAATCAGTTAGGAAAACCAATATTATTAA  
AAGCTGACCGAGACGGCGCACTTTCCAGCTTAGCACTAAAAGAAATGGCTTGAAAGTGAAGGAGTAGAA  
ATACAATTAATAACAACAAAAACAGGAATAGCAGACATCGAAAGACTACATATAACAATAAATTAAAAA  
TCAGAATAATTAACACTTTAAATGACGAAGAAAATAAACTCAGCAAAATAGAAACAATTCTTTACATTTA  
CAATCACAAAACAAAACATGACACAACCTGGACAAACTCCTGCACACATTTTCTTATATGCTGGACAATA  
AATTTAGATACCCAAGAAAAAGAGGAAAAAATAATAAATAAAATTAACAGTGACCGACAAGAATACGAA  
GTTGATACTAGATATCGAAAAGGACCATTACAAAAAGGAAAATTAGAAAACCCATTTAAAGCTAATAAA  
AACGTTGAACAAACAGACCCAGACCATTATCAAATTACTAACAGAAATTTCTATTTCTAAAACACAATTT  
AAAAAACGAAAGAAATTTAATCAAATCTTAATGCCACAAGTCTATTAAATACAATGGTGATGTTAGTTCT  
ATTAATCACCATGCCCCAAAAAAAATAATTAATTTGACAATTAACAGTACAATACTGCAATAGAAT  
ACCGGAATAATCCTACACCAAGAAAATAGACAGAAACAAAGACTGTTTAACATA

>Ref\_dvir\_633

TCCTGGGGCCCAAGGTGTAACGTCCCTCCCGAGGGGCGTTAATGAGAGCGAGGTAGTGCAAATTCATCTC  
AAACGTAGGATGGAATATAGCCATGATTTTCATGGCTGAAACCATTAGGCCTTCTAAAGTTGCTGAAGCAA  
TAAAATTTTATAGTCAACACCGAGCTTTACAGAAAGCATCAAATTACTATTAATGAACAGTGGTTGTCGTCT  
TTTTCGTCTGACGAGGTTCCGTTTGTGTCATCTGCTGATGACAGGGACTTAGTAGTTAGTGGCAAGATCTG  
CTCAAGCCTCCATAGATGAGCAGAATAATATAGAAGAAGATATTAATCCAGGAGGCCAGGAAACATTATT  
AGAAAACGTCCCTGTGCAAAATATTGCCATGCAAAGAATAGTTATAGCCCCTGGAGAGGGTCAGCGGCCT  
TTAGACATGATCGAAGATTGTGATTCAGAGGAGCTGGCCTTCCCAACTATTTTTGCTGGCATTAAAGAGAAA  
GTGTGCAGAAAGTTTTACAACCATTGTAGAACAGATAAATTATTTCTCAATTTTAAAAATTGGAAATGAT  
TAATATAAGGAACAGTACTTCCATTTGCTTACGTAAGCACAGCGCCACTCGAGGCATTACGGCAGCACAA  
GTCCTTAATGAGGAGTATTTAGAAAATTTAATACGTCACGATGATTGCTATAGGGTTTTGAAAAATATGCA  
CTTCACCTGCTCATTGGGAAGGAGAAAAAGAAAGGTCATGGCGATGATAAGGCAGATTGGTCTTCCGAC  
ATTTTTTATAACCTTTTCGGCAGCAGAGACTAGATGGGCAGAGCTGTTAGTTTTACTTTCAAAGAATGTAG  
ATAAGCTAGAAATTTCAGAAGAATTGGCAGCTAATTTAAGTTTTGCCAATAAAGCCCGTCTAATTAGAGC

CGACCCTGTTACTTGCGCTAGGTATTTTGATTTTCGTTACAGGCAGGTTTTAAAACTGATGAAAAAGGAAG  
GCGGTGTTTTTTGGTAGTCACAGAGTTATTAAGTATTATTGGCGAGTTGAGTTTCAGCAAAGAGGCTCCCC  
CACGTTTCATGGCATGTTTTGGCTGAAAGATGCTCCGATAGTTGACTTGGCTGATGAGTCAAGCAAAGTCCT  
TTATGATCAGCTCAGGTCGAGTATAAAGAAGCCCAAAATATTCGCAGCAATTAAGCTTAACGCTTATAAT  
ACTCACCTCCTTCTACTGCCGCGCGCCAATATAGATATCCAGTTTATATTAGATCCCTATGCTTGCTGCAGT  
TACGTCGTTAATTATATTAACAAGTCCCAGAGAGGCATTTCAAAGCTAATGGGCAATGTAACCTTTAAAGC  
AAAGGTTACATATAGCCCAGGAAGCCGTTTACTGCTGTTTAGGTATGTCTTTGTCCGAAAGCAGTAACGCA  
GTGGTTTTTTATTAATACCTCATTACCAGAGCATCGGGTTGGGTAAAGGAAGTCTAAGCAACAGTTGCAAA  
ACTTACCCGATGACTCAGTAGCAATATTGGAAATAGGACTTATAGACCATTATGTTTCAGCGCCCGACGCTT  
TAGATAGTTTATGCCTAGCTGATTTTGCTGCTTTTTACAGTTTTAGCAAACGGCATAAGTGGTACTCGCCAA  
AATATAGATGATGCACCCAGGGCTTCCCAGCAATTAGTTTTATTTTCGAGAATTATTTATATTGTATGTTCC  
ATTTAGGGATGTTAATGTGGAATAATAGTAATGGATTGCGAATAGTTTTGCAGCCAGAATCAGGAGCTA  
TTCGAGAGCACTCGCAGTAAATGTAATAGCTTAAATGCCAGTGAGCTTCAGCATACTCTTGAAAATGCAG  
TAGAGGCACAAATTTTAGAAAAATGTTAAAAATTAAGAAATAGTAGACGATAGATATTAATCCTCGTTTAA  
ATGTCTTAAACACAAATAGAAATGACGAGAATCTAGATCCAGAACAATGCCCCGATAAATAAACTTCCAG  
CTATAGTTTCAGCTGAAAGTTTAGATGTATTCAGGTAACCTTCATTTAAAGCAGAAAACATATGTTGAAACA  
TATGCACAATACGAAAACTAATCCGCTCTTCTACGAATTTGTTGGAGGTGGTGCGGGTGTCGGAAAGAGC  
CGACTTATCTCAGCGCTTTTTTTCAATCTTTGTGCGTACTGTACAATAGAAAGCCAAGGAAGTGATCCAAA  
TTCTCCTAAAATAATATTGTGTGCTCC

>Ref\_dvir\_1012

TCAGTTCTGTAAGCATCACCATAGAAGTCAGTCGTGTTGCTCATAAATTTGTAAAACCTTTATTA AAAACTT  
CATAACCACCCACACACGCCCACTTGAGATAAGATTCTTAAAAGGTCAAAAAAACGCTTTCGATCCAACAT  
TTTGCGGCCCAACATTGGGGCTAGTGTGTGGAATTGACGGCATATCGTTGCCGCACAACATCTCGTTGGA  
AAAAGGTTTTATCGAACTCCTCGCAAAATACAGCATCGACAGCAATATTTGGCCAGCTCTTCATTCTTGTA  
GCCGTTACTTCGTGCTGGGTTGCTCTGAGTTTGATTGCTCATTGCCTTTGCCTCACATCTCCTTGCTCGTT  
GCCGTTGCTTCGTGCTGGAACCTCGCTACCTTCGCTTTGCTGCTGCATTCTCGTTGCCGTTGCTTCGTGCA  
TGGAAGCTGGCTGCCTCTGCTTGTTCACTGCATTTTGCTTCATCACTTCAAGCGACCCTCACATCGGTGAG  
CGCAACATTTACAAGTCTTAGCTGTTCTGTTAACAGTGAGGAGCATTTGAACTGTCGCTCGCTCACATTGGT  
GAGAGTGACATTATCAGGTTAAAGTTAGGCTGTGAAAATTTGGCAGTATCAAAACTGTCGCTCAAGAGTG  
TCTACTGAGGTCGATGGCAGTGAAAAAAGATTATCACACGGTGAGCTACAATTACGCTTGACATGTTGG  
AGATATACATTAAGGAGGTTTCGGAAGTACAATCTGAAATTGAATTGGAAGATCCTCAGGACAATGGACG  
TGCAGAGGTGGAAGACACATATGTGAGTATCAAATTGTCCATCCAATCCCAACTGGATGATGTACTGCAC  
AGCACCTCATTTTCTAACCCTGCTCCAATTCGCTCTTCGCCGCCATCGAGTCTTCCTCGATTGGCTCCGCCT  
GTATTTGATGGGAAACGAGCAGAGTTTAAAAACTTCATTACATCATTCAATCAGATTATCGGTGCTGAGTA  
CTCTCTTTCGAACATTGAAAAGTTTAATCATCTGCTGAATTGCTTGAAGGGCCCTGCCCTACAGGCAGTAA  
AGGCATTCCAAGTGACTCAGGAAAATTATCCCAAAGGCTCTTGCTCGTTTAAAGTGAACGTTATGACAATCC  
TACACTTACATTTTATAGGACTCAATAGAATCACTATTCAATCTACAGCCCAGTCGACAAACCGGACGGAA  
ATCAGCTGTGCGAGTCTGCTGGACAATGCGTCACGCCCTGTAATCATCATTATCCGCCATTGGGTACCGGA  
TCAGATATTGCCCAAGCCATGTTGATATTCATCGTCATCGGAAAATGTGACCAGCAAACCTCGTAACAAGT  
GGAATGAGTCTTCTTGACTTACGTACATTGCCAAATTGGGCTCACTGCACAACCTATTTTGGAACGTCATTG  
TCAGTTTCTGCAATCAAGCGGCATTGCATCGTATCGAATGGCTGATTCTTCGAAACAAAAACACGTGTACA  
AGCCTAGCAAGGGATTATCATTGCTATTACTAATCCAACATGCATTGTTTGTTCCAGCTCCGACCATAAA  
ATTGTACAATGTTCTCAGTTTCAAGACATGAGTCCTAAACTCAAGTACGGAGTCGTAAAAAATGCTGGAC  
TTTGCAATTAATTGCCTTCAATTAGGACATCGGATGGCTCAGTGTCCGTCTAACAATCGTTGTGCAAGCTGC  
AAGCATCGCCATCACACGCTTCTGCATTTTGGCCAACCGCCTGCATCATCATCGTCTACATCGCCATCATC  
CATAGCGCAAATGTCCTCAACAACGACTCCAGCTACAAAGCGCTCGCATATGAATCAATCGCCAGGCGGG  
CAAATAATTCTTCTACTGCAAAGGTACTAGTGCGGCTGCATCTACGCCGTGATAAGCATAATTTTCGAAATC  
CGCAGCATAGGGGAGACCTCGACTAAAATTAACAACGTGTACAATAATGGAATTAATCTCGTTTGTGTCAC  
CATTTGAAGTAACACTACAGTTCTGCATAACGTCTCACATTGCCTACCAGCCGGATTTCGGAAATCGACACC  
TCAGATTGGAGGTTGCTCGCGAACACCACTTGCGGACGAAACTTTCCACAGGTAAGGTCGGATTGATCTC  
CTTATCGGTACCGAGGTATTTTTTCGAATGCCTGGCTGTTGAACAGATTAAACTCGAAGACAATTTTTCCAG  
TCCTTCAGA

>Ref\_dvir\_840

TTCTTCTACGCTGCAGTTGCGAATGCGGGACACTATAGTAACTCAAAAAACATCCGAACAAACAAAAACAA

AAACACTAGTCCAAATCACAACAAACCAACCAAGATAACACAATGCCTTATGCTAATAAAGAAACAAC  
AACACAACACCACTGAACACCTCCTCCACGCCGCTGACTTATCAGCAAAATCAACAGAAAAACAACACA  
AACAGAACATTTCGATGATGACTACGAGAGTCTTGGCCTCTCGCCTAAAACTACTCAATTCCTAAAAACAAC  
TTAAATCTAACAAAAATAAAAAATAATTCTAATTCAAATATCCTAACTAATATCACATATCAGATGATCCTA  
TGGATGATTCTGATATATAAACTGAACCTAACTTTTTCCATTGCATATAATATCCACTTTATCTCTTCCAAT  
GACCCTTAAGATTCTACAATGGAACATAAACGGATACTTCAACAATAACATTGAACCTTTCATTATTAATTA  
AACAAAGCCAATCCAGATATTATATGCCTACAAGAGACTAATCTTAAATTTAATAATTCTCAAGTTGCAACC  
CCCAAACCATTTATTGGTTATTTTTTCAACAATTCTTCCATTCTCCATGCGAAGCATGGCGTTGGTATACTT  
ATACGGCAAAACATCCCACACAAAACCTATCAATTTGATCTCACCCACTTGCTCCATGGGCAGCTTTTATCC  
CACCCGAATATAATAATATTTAATTCTTATATACCCCCCAACCAAGACTATTAGCTACAGATTTAATAAA  
TATTATAGAGTCAGCCCAAAACCTATAGTTTTTGTGGGGACTTTAACGCTTGGAGTCCGCTTTGGGGGTCC  
TGCTCCCGGAACCCCAAAGGTTATCAAGTTGAAGATCTTATAGTCAAAACAAACTTAGCCATTCTAAATG  
ACGGCTCTGCCACCCACCATTCTACCCACAACCTCCTTTACTAACATCGACCTAAGTATGGCGTCCGCAACC  
CTCGCTTCCAATTAGTTCAAAACCGACCATGCCACTGGAGTACCTTCCAATCTGTCTGCAAAAATCACTTT  
CAGTTTCCCTCGGCCAACGATCTGAACCTCTTCGCCCATTCACAACTAATACCAAAAAACAGATAATGTAC  
CCTGCTTGGTTTAGCTCAAGTCTCCAAGATCTGAGAAAACAAAAGCAAGTTCTTTGACACATCTATAAATC  
TTCTCAAACCTGTACCAATCTAGTAGCTTACAAAGAAGCAAGAGCCCTGTTTAAAAGAGAAGCTATTAGGG  
CAAAACGAGAATCTTTTAGCAGTTTCATCTCTAAAATAAACCCACTTTCCACAACCAAAAAAAAATGGGC  
AGATATCAACAAATTAGTAGGGATTTTCCAGGGCCTTTTAAATCCATAGATAATAATGTAGAGCTCCAA  
AATTCAGTAGACATTGGCAATGCATTTGGCTATGTGGTCCAATTATTCAGGGGATGAAAACCTTCTCAAATG  
CGTATAAAGTTAATAAGGAAAATCTCAGGCATATCTGCCCAACACATATCCTCAAATGCTAAGTACCTTG  
AATCTCAGTTCATAGAATTAGCCCTAAAGGGAAAACCTCCTGGGTATGACCGCATCTCGTACAATATGGTTC  
GAACTTACCAATAGAAGGAAAGAAAAGAATACTAGAAATGTACAACATAATGTAAGATGGGGGTAACT  
ATCCGCACGCGTGGAACCGGCTACAACCTATCCCAATCCTTAAACCAAAACAAACCTTCCCACGAATTATC  
ATCCTTTTCGTCCCATATCCCTACTCTCCTGCTTGAGCAAAACACTGGAAAAAATTCTTGCCAAAAGGATC  
ATGTGGTTTATATCCAAAAATAAACTTATCAGCCCCAACCAAACTGCATTCAAACAACAGCACAGTACCA  
TTCCTCCCTATTGCATATCCATCATTACGCGTCAAATGCCCTTTCAACCAGAAATCATGTAACCATCCTG  
GCTAATAATTTTCGAAAGGGCATTGAGCGCGTTGGAGTGCACACAGTACTGGAGCAACTTTACCGGTGGG  
GGGGTGGGTCCTAAACCTTCAACCTCGTAAAGGCTTTCATGGACAAGCGATCCATTTCGTGTTAAAGTTT  
AAAACACCCTTACCTAAGTTCCTATAAATTACACA

>9\_rnd-5\_family-2214\_\_LTR\_\_Gypsy

GTGGGTGTGTATTACTCAAGGCAGGCCATTGCCCACNTTCGACGTACTCATAACAACAACGAGATCCCTA  
GACAACAACCATTC AACACACAACGAAGGCGAATTTCGCCAGTCGGCGAATCCGCTAAAACAGAAGACGA  
AAACGTGCACGATGCAAAGAAGAGCAGCGTGCCGAAAACGACGAAGACGGGAGTTGGAGTTCGGCCTTA  
GACGAGAAAGGTTGTGAGAGCTGCTTCCCAAACGAGGAAAGACGACGATTTCGCTGATCCTATAACTTAAT  
CCCAACTATTTGTAACCTTTAAACATTACAATAATATTTGTATAACCTTATCCAAAATAAAACCCACATAT  
TTGGGAGCTCATCCGGGATAAAAAGAAGTAAAGTGGTTAAAAGGCTCATCAAAGACGATTAACGAAGT  
AAAGTGANTTGTGATAGTGAACATTTTTTGTAGACAACGTAAGAAGTGGAAGGCTGCAAAATTGTTTCAG  
AGGTGTAAAAGAGGAAGGACTGAAGTGTTGAAATCGTGTGAGAAATAAAAGATAGTACTACTTTTTTTCT  
CCACATCTCATTTGTAAATGGCAAATTTAAACGAGTTAATTCCAAGAAGTTTGAAGCCGAAGGTGACAGG  
AATAACAGACGCCGTCTGCGTGAATTTAGTTTTTAAATATAATGAAAACGACGCAACGTTTTTGGCGAAA  
AGCGTATACATAACAAGAAAAATTGTCTGAGCATGACCTTGTATCGATTTGCACAGTGTTGGGAATAAACC  
ACAGCGTAAAAACATTCCGTTACATATTTTTCGAAATTTGCTCGCCGGACAACCGCTTCGGCACAACAATA  
ACGCAGACGAGGGAAGCAGCGATGAAGAAAATGAAGACCTTGAGAGCGGCGCGCACGGATTTGACGATT  
TCGCACACGACGAAGAGGAAGTAGCAGAAGAAGCAACGGTTGAAAACGTACGAGCAGGCGCAGCTCGA  
AACACAAAGCGAAACGACGATTGCCGACAACGCGTCAACGAATTGCAAGCACAACGCTTTGCTATAAGTT  
TCCGCGACGTGGAAGAGTCCGTTTCGAGTATTTGATGGTAGTGAAGAAATNTCTATGAAGATGCGATCGAA  
GAACAAGCTTTGCTTTATGTGTTGGAGTGATTTGCAAACGCTCATTTTTCGCAAAGAAATCATTGCGAGGCA  
TTGCGAAATTATTTGTTTTGAGCGAAAAGCATCTCAATTCATGGGTTGCTCTGAAGAGTGCAATTGTTGAGC  
GAATTCAAATCTGGAGTGAACAGCAAGCGAATACACTCACAGTTGACTGAGAGCAAGCGTCGAAATGGT  
GAGAGACATTGCATCTCGTGGAATGTGGAGGACGAAGCACTCATGCAATACGTGATCGATGGTATAGAT  
GATTTTTCCAATAACAAATCGATTTTATATGGTGCAAAAAAACGAGTTTAAAAACAAATTAAAGGACTAT  
GAAAAATTGAGTGGAAGAAAAAATAAGAAAAGTGTAATTTGACAAAGAGAAAAAAGGTGCAAAATGAT  
GCACAGTGGTACGCGCAGGAAAAAAGAAATCAATTGTTTTAGTTGTGGAGAAAAGGGGCATTTAGCCAA

CAATTGCATGAATAAAACAAAAGGGAAGAAAGTTTTAATTGTAACCAATTCGACACATATCGAAATATTGT  
AAGGAAAAATGTGAAAATCAAAATGAAGTCAAATCAAATATTCGTGTTGTAAAGAACAAAACCGCGCTA  
ACGTCAAAAGAAGTTTATTTCAAAAACAAGAAGTATTTAGCATTGTTTGATACCGGTAGCAAGTTTAATGT  
TTTACGTGAAGATCTTTATAAGGAACTTTCCCTTCCAAAATTAGAAATCTGCAATGTTTTTCTTATTGGATT  
CGGCAGTGAGCGCAGTGAGAATAAAAATGAAGAGTTTATACTTGATTTTTACGTGGTTCCAATTAAATGT  
ATTGATGTCAAAGTTATTCTTGCGGAAGAACTATGTTTACAGGCTGAGATTGTATTTAGTCGTAACGGTAA  
GCGTAATAAAAATTGATGCGGTAATCGATAATGATCAAGTCGATATAAACTCTCAGATTGGTGATGTTAC  
AAAAAACAGAGTAC

>Ref\_dvir\_679

TGCTCGTCATCGCTCACACCAACCCACGATTCGTCACCACATGCTCGTCATCGCCCAACACTGGGCTTCA  
CGAATTCATAAACCACATTGGTCGTTTCATGGCCCAACAATTGGCTTCACGAACCTCATCAACCACATTGCTC  
GTTTCATCGCCCAACACATGGGCTTCACGAATTCATCAACCACATTGCTCGTTTCATCGCTCAACACTTGGCT  
TCACGAATTCATCAACCACATTGCTCGTTTCATCGCCCAACACTTGGCTTCACGAATTCATCAACCACATTG  
CTCGTTTCATCGCCCAACACTTGGCTTCACGAATTCATCAACCACATTGCTCGTTTCATCACCCAACACTTGG  
CTTCACGAATTCATCAACCACATTGCTCGTTTCATCGCCCAACACTTGGCTTCACGAATTCATCAACCACAT  
TGCTCGTTTCATCGCCCAACACTTGGCTTCACGAATTCATCAACCACATTGCTCGTTTCATCGCCCAACACGG  
GCTTCTGCACGAATTCATCAACCACATTGCTCGTTTCATCGCCCAACACTTGGCTTCACGAATTCATCAACC  
ACATTGCTCGTTTCATCGCCCAACACTTGGCTTCACGAATTCATCAACCACATTGCTCGTTTCATCGCCCAAC  
ACTTGGCTTCACGAATACATCAAGCTCTTCTGGAATTTGCACATCCGTAACCTCCGCAAACCTTCGTGTGGA  
TATTTGTAACGTCTATTGTTCTGTGTAGACTTTAAACGTGTCTCCGTCCAATACCTCGACCACAAAAAAG  
GGCCTTTGAACTTTGGATCTAATTTTGTGTTGCTGTCTCTCACTGTTTTTAAGCAAAACAAAGTCACCCACAC  
AGAACCTAATTAGCTTAGCCATATTTTTATCAAAATTTTCAGTTTCATAACGAGATAACGCTAACCTATTAG  
AAACGCTTTCTTTATATAATTAGCACTCAGCTACCGAATCAATGTAATCGGAAATCTCTCACCATTGACCA  
GCATACTCGATTGAAGCTCCACTATAGCGCAAAGCTCCACTCTTTTTTCCGATATTACTCCAAATCCGGAT  
TCTGCACTTTTTTTTTGGAATTAGTGAGACATTTGAGTTCATACTTTAGCACGCTTGGTCTCTGGTTTCCAGT  
TTGATGTAATAACACGCTCTTTCAACATTGAGAATACTTGCAGCTCCGCTTGCAGTTCACGTCGACTGTAT  
ACATGCGTTGTGTATATCATTCGTTGCAAACGCCGGTCGAAATTAGCCATGTGCCCAAGAACCAGCGCGA  
TAGAAATTTGTTTCAAAATTACGCAATTTTGTGCACAGTGGCAAACCTTTCACCGTTGCTTGGACGA  
CTATTAAGAAAATCAAAATAACAGCGGCTGGCGTCTCCGATGTCTCGTATCGCTGCTCAAACAATTGCCTG  
AACTGTTGCCAAGTTATTCCTGGGTAGCATATTTGTGATAACCACTGGGCGGCTGCGCCTTCCAAAGCTTT  
ACTCAACGCTAATATAAGAGCGCTGTCACTTAACGGTTTTCTTGTAATAATGATGTGACCGTAGCGCACCA  
CTGCGTGGCATCCACCCAGCAATGTCCGGATTATATTTCCGCAAGCAAATCTCGCTAGTCTGTTGTAACCT  
CGCTCGCCGGCATCTGTAGCCTCTTAACCAGTTCAAGAAAATTCGGGTTTTGCTGCTCTAACAACGCGAAG  
ACATTCCTTGAAGAAGTTTGGTTAGGGCCGAATCCCACTTCTGATGTGCGGAGAATTAATGTCATCTCCCTG  
CGGGTCGTCATTATTGGTCGCTTGGTCGCACGGATTCTGGTGTTCCATACTCAGTCCTGGCGAATGCAGCG  
AGTCTTCGTTGCCTTTGTTGCTCATTATTCTCTTAAATACACACACGTGACCAACTCACGTACGCGCGGAA  
ACACAGGACAGCCACAAGAGAGAGACCAGATCTAGCAACGCATACGAAGCCACACACAGCCTCAGTTCCG  
CAAACCTGAGTCCCCATTCTACCAGAACTAGTATCTACCAGCACATCCCATGGTTCACACCTTAACGTCTCAT  
GCCTATCGAGATGCTACAGTACTTTCCTCTCCGAC

>9\_rnd-5\_family-2333\_\_Unknown

ATAGATGTAGGAACCTCTAGAAGGCCCGAGCGACAGAGAATAACACGCACCGGTCGTTGTGTCTGATCGC  
CTCTCTTCGCTTATTTATAATCTCTCCGGTTCTCGCGTCTGATAAAGCAGGCTGCGCAACGCGAAAAGAAA  
AGGAGCGACACTTTGCATTTAGTAGTTGAATGAAAACTAGTCGTCCGTCGAATAGTTGTGTAAAGTTTTA  
ATAATAACTTAAATCATCCCGTAATAACTTAAAAATAATAATAATCAATCATCTTATAATATTAACATAT  
TTGTAAGAGTTAACCCTTTGAAACAAATTATAATAAGAACTTCTATAGTAATAAAGAACCTACAAATT  
GGGGGCTCAACCGGGATTATCCAAGTTACAAAAACAATGAGACAAAGTGAGTGAATTTTAAAGAAAAAA  
ACATCATCGTAAAGGTCGATATAAAAGACGTGTGCAGTTGGAAAAACAGAGTGCAAAGTAAAGTGTGAG  
CGAGATAGCAANAGGCGCTCAGTAAAAAACGTTATTCCAAAAAATAAATTTCTGGTGAAATCCGGACTTT  
GTGTGTATGCATCGCCAAAAGCGAAGCAGACAGAAAGAACGAGAAGAGAGAAGTGCAAAGTAAAGTGT  
GAGCGAAATGGCAACAGACGCTCAGTGAAACGTTATTCCAAAAAATAAATTTCTGGTGAAATCCGGNCTT  
TGTGTGTATGCATCGCCAAAAGCGAAGCAGACAGAAAGAACGAGAAGAGAGAAGAGAAGAGAAAAGTA  
ATAGAAGGCTGGAGTAGAGTTGGCGTTTTCTGTGGGCCGGTGCGTAAGGGAAACCAAAACGATCAAAGC  
AGCTGGTCATCTATGAGGAACGCAGGCAAGTTGGCCAAGGCGTGAAATAGACAGCAGCAATTTCTTGGTA  
CGCTGGCAAGGTGGTCGAGCGTAATAGAAGGCTGGAGCAGAGTCGGTGTTAGCAGTTACGCAGGCGGAT

GAGCCAGTGCGACAGAGTCCTTCGTGGGAGTGTTGGGAAACGTTCAAATCGTGTGGTGAGCTGCAGCAGC  
GCTGCAAAATAAAATTTTACTATTTGTGCTGACCTTAGCAAGTGGTGTATCTTGCGCAGACAGATCGTACA  
TTATTAACATAAGAAATTTAGTCACGGACGGTGACACGAAACACGGAAGAAANTTAAANTNNTNTTTGCAT  
AATTGTTTTATGTTTCATCGACATTATTCATTAACATAGTTTTTAACATTTTGATAACNGCTGAGAACAAATTC  
AAAAACAAACGGCCCTTAGCGCTGTTAAACTCAAGATACAAAAGAGTGTCCGTCGAGGCTGTTAAACTTA  
AGCTACAAAAGAGAGCAGCCGCTGTTATTACTAATTAACATAGGACAAACTGAAGCTGTTGTGCTGAAAA  
TTTACATCTAAGAATATCAAATCTGAAAATAGTAAATAAGAATAATTTGAAAACCTAAAATCTAAGTAAC  
CGTGTGNCAATTTTTGTAAAGATGGAGAGAAACGAGATTCTAAGTCTTCGTGTGATCAATTACGCGAAAA  
ATNAACAGATTTGCAATTGAGTACTGCAGGACGCAAAGCTGAACTGCAAGCAAGACTATTTGAACANTAT  
GGCATGGAAATAGAAGAAGAGGGTTCAGGTGATGATACGTCGGTTAATGCAGCACCTTTGATGCAGAGTC  
CTGAAAGAGCTAGGTTCGTGGTTTACGCTGAAAGATGTTGAGGGTAGCGTGTATAAATTTGATGGGTTCGAG  
TTCGAGAGATATTGAACAGTGGGTGAGTGAGTTAGAAGAATGCGCTATAACAGTACAGTGGAGCGACTTA  
CAGTTATTTATCTATGCCAAGCAGTTGCTTGAGGGTGCCGCTAAATCATTTATTCGTAGTCAGCGGGGTAT  
TAATAACTGGGAAGCGCTAAAAAACGCATTGAAAAATGAATTTGAGGTAAGATTGTCATCAGCAGAAGTT  
CATAGACGNTTGGGAAAGCGACAGCAGAAAAAGGGCGAGACGTTGTTAGAATTTTTATATGCGTTGATGG  
AAATAGCAAAATCTATCGATCTCGAGGATGAGAGTTTGATTGACTATTTTATAGAAGGCAT

>Ref\_dvir\_995

GGGCCCTGCATATAGCACATCGTCCAGACCTTTACCGTTCGATGACGGGTGGAAGCCGTTAAATACTACA  
CGGAGCTTGGTCGTGGTGCTGTCAGGCTTGTGAACAGCATGGTGTGGTAGATAAAAGTTATCCAAACAAT  
TGCTTGGAGGGACTTGTTCGCATGTGACCTAAGTCCAGATATTCCTGGATCACCGCATCGTACTGCTCCTTA  
AGGGGGGCATTTTTTGCCAGCTAGTGCGATGGACCTTGAAAGCCTAACTGGATGTGATCGGAATTCTTGA  
ATGGGACCAAGTATCTGCCGTTTTTATCTCTTTTAGTGTTCTTTTGGAATTTGCGCTAGGTTCGGATTCCTTT  
TCCAGCTTTACTGGAATATCCTCCACCTCCCAAAATTTTGTGAGCAGTTTATCCAAGCTCGCATTTGGATTC  
AGCGAGACTTGAGTCGAAAAGGATGCGATCGATTTGGCACTGGTCTTAGAAAACGGGGCCTGTAAGGTCCA  
TCGTTTCTTGACCAAGGAGAGTGCCACATATGTTGGGATAGGAGCCACCTAACCGAGAAGCACGTCTATC  
TGTGAGCTCCTATAGAAAGAGGGATCGGCCAAGTGTTATTTTGAAGTTCTTCCAAGCGGTTTGGGGGA  
TGGTGTAGGAGGGCAAATTGCCTGCTAGCTTTGAAAGAACATAAGCCGACGTTTCAATATAAGCCCTGGG  
CGGAGAGCCAATATTAATAATGGCAAAGTTTTTGAGGTTGAGCCGAAATAGCTTGATTCAAACCGGAGACC  
TGTGCGTCGACGGGTTGATAAGGAAGTTTAACCCTTTTGAACAATCGCTCTGAAATAAAGGTGCTTCAG  
ACCCAGAGTCGATTAATGCCCAGAGCTGTATACTTTGTGCCCAAATGACACACTTGGATGACAGCCGTGCC  
GAGGAGAACACCATGTGAGTTTGC GGAAAAGTAGTTTTGAACGGTAGCTTGGGTGCAAGTAGAAGTGGA  
CTGTATAGACGAAGGAGGGTTCAAAACTATTGGTGTTGTGGAAGCTGAGGGCACCTGGGGTCTGTCACGG  
TGGAGCAGCGTGTGTGACGTCCCTTGACAGTGAAACAACATATGTGCGCTGGTGCAGTCTTCAACTGGTG  
CTGTCTGGCGAAGCAGTTTAAGCACAACTTTTGTGCTTAATGACGGAAACTCTCTCGGGTACGGACATTT  
GTAGAAAACGTGGGCATAGACGCACGGGATGGTTTTCTTCTGACACAATTTGCAGTGTTGTGACTTTGTA  
GTCAGTGTGCTTCGAAGGTTCTCAGGTGGTTGGACTCTTTTCTTGTGGGTTTAGACTGGGGTGGCGTATGT  
GCGGTAGGTTCGTACATCCTCTATCGCCTCCAAGGTGCGATATCGGTGATCAGAAATGAATTCATCTCGGA  
CCATTGAGGTATCTCTGCCTTATCGTGGAGCGATTGTTCCCATACGACAGCGTGAGCTTAGGCAATTTAG  
AGGAGCACAAAGAAAATAAGCAGACAATCCCAATTTTCGGTGCTCACCTGGACAAGTCGAGAGCCGTAA  
ACATCCCTGGATTGTGCCCTGAAGCTCTTGGCCTGACTGAAAGCCGTCATTTCGTGAGCGGGGACTTGGAG  
ACAATTGCCCTAGCTTCGCCGCTGGTTTTGGAATTTAGATGGAACAATTTTCCACCGGCGTCAGTCTTGG  
ATTGTTAATATAAACCGCTGTAAACAAGTCTCGGAAAGTAGGCCAGCGTAGGTAATCCCCACTGAAAAC  
TCAGTGTCGCATGGCGGGAGACTGCAACCCCTGGACATGGAGAAGTTGGAGGGGGGTTGCTCAGCTTGTC  
TATTTAAAGCAGTGGCTCTTTCTATTTTTTCACTTAGTTGAGCCGCACATCGCCCGTAAACCAAGTACGAG  
TAATCATATTTAGGTTGCATAGCCACAAGGTCACTGCTGCTGCAAGCGCCTAGGTTGAGAGCTTTACAACA  
TAAATCGTACTCGGTTCCACCTCTTCCCATAAAGTCTTAATCTGATCTCACCGGACTTGGAGAGTGAACA  
GTGACACGTCACTACCCGCTGCTTCATTGATCTTT

>160\_rnd-4\_family-335\_\_RC\_\_Helitron

ACCACTAACCAAAACAACATATAGACTGGACATGAGTACAGAGAAGTAGNCACAAAANGTATCGGTGGCA  
TCTGGTCCAAANTCGCGAGTAAGGGAGTAAGATATACATATGATGTATTTTTGAACCGCTTACTCTACAGG  
AAAGTGCTTGGCGCACTCTCTTCCATATGATTTGTGCGATAGAACGGCAACGCTGTAACTTTTATCTCGC  
TCGCACTTACTCTCAGCTCTCAATGCTCTCTCTATGTTTAGGGATCGTTTCAATGTGTGTGTGTGTGATTT  
GTCCGACNAGCAAAACTGCGCACAAATTCAATTTTTCCCAAATGCTGAGGCATTTCTACCCCTTTTGAAGGC  
ACGGCTAATATGAAATAGAGAAAGGGTTTGCCACGTCGATGCGAAATTCTTGCATTTTAGCTCGCTATCGT



TGGTAAGGGTACCCAAGCGTTGCCATGTGTGCATTTAGAAATATTTTGGACTCGCTATNCACGCATACTTGC  
ATATTTTGTGTATGAATAGAAGCATTATATGCGCTTGTGTGCCTGTTGCTTGCCTGCCTGTCCCCGATG  
CAAATTTAACAAGATTTTAGGATTTCTGATTTTGGACCTCTACACACAGACACACACATACAAATGTCTGT  
GAATGGGCTGATCATGGGCGCAAAAGAAAATACATTATTGGCACGCGTCTGACGCGCGCCCTTCTTTTTTG  
AGATTTTGATGAATGAATGTTGAACCCCTTATTACCTGCAGCAGCTCGTTGGGTCTGAATGGGTCAACTTTT  
GGCAAGCACCTGCATATGGAGGTCAAGTGACTGATCACCAAATTATTAACCATAAATATATAATCGC  
TCCTTTTTTTTAATTTGGTATATTTTAATATTTTAAAGATTTTATTTTTACTCAAATTCATCAAAATCATN  
AAAAAGAAGGGCGCGCGTCAGACGCGTGCCAATAATGATATTTTCTTTTGGCGCCCATGATCAGCCCATT  
ACAGACATTTGTATGTGTGTGTCTGTGTGTAGAGGTCCAAAATCAGAAATCCTAAAATCTTGTTAAATTTG  
CATCGGGGACAGGCAGGCAGGCAAGCAACAGGCACACAAGCGCATAAATGCTTCTATTTCATATACAAAA  
TATGCAAGTATGCGTGAATAGCGAGTCCAAAATATTTTAAATGCACACATGGCAACGCTTGGGTACCCTT  
ACCAACGATAGCGAGCTAAAATGCAAGAATTTTCGCATCGACGTGGCAAACCCCTTCTCTATTTTCATATTAG  
CCGTGCCTTCAAAAGGGTAGAAATGCCTCAGCATTTGGGAAAAATTGAATTTGTGCGCAGTTTTGCTCGTC  
GGACAAATACACACACACACACATTGAAACGATCCCTAAACATAAGAGAGAGCATTGAGAGCTGAGAGT  
AAGTGCGAGCGAGATAAAAGTTAACAGCGTTGCCGTTCTATCGCACAAATCATATGGAAGAGAGTGCGCC  
AAGCACTTTCCTGTAGAGTAAGCGGTTCAAAAATACATCATATGTATATCTTACTCCCTTACTCGCGAGTT  
TGGACCAGATGCCTCCGATACNTTTTGTGNCTACTTTCCGGTACTCATGTCCAGTCTATATGTTGTTTGGTT  
AGTGGTATAAGGGTATATTGTATTTGTGCACAAATGTATGTAACAGGCAGAAGGAAGCATCTCCGACCCC  
ANAAAGTATATATATTCTTGATCAGCATCAATAGCCGAGTCGATCTGGCCATGTCCGTCTGTCTGTCCGTC  
CGTCCGTCCGTATGTATGAACGCAAGGATCTCAGAACCTATAAGGGCTAGAGACTTGAAATTTTATCCTGT  
TTTTTGGGCAATTTTGGTAAACAATAAGAGCTAGAGTCACCAAACCTTGACATATANCTTCTGATATAGAAT  
ATATATGTGCATTTGATGTTGGAAGANGAGGGTTCAGGGTATCCCCTAGTCGGGAGCTCCCGACTAGAAC  
NTCTTACCTGTTTTAATTCAGACATGTCGGGTTGTAGTTTTAGTTTTGCTTCCGTATGTTTGTAATAACTT  
GTTTTATTCAATGTGTTCT

>160\_rnd-5\_family-4918\_\_LINE\_\_I-Jockey

CAATATTTTACTCCGCCCCTGTGAGTACGAAGCCACTGACGGGGGCCAGGAATGAGAGCAACAATGCCT  
CGAAGTGCCAGGCGGTCAACTACACACTGAGGCGTGGCAAGGCTCCAGCAGTCTGGATAGATGGCAGCC  
CCTTACCCCTGGCATAAGCGCCAAGTATCTTGGAATTGTACTGGATAAGAGGCTTACCTTCGGGCGCACAT  
CGACGGCCTTCTCAAGCAGTGCCGCTTTAAGATGGCCAAGGCCAACTGGCTACTAAGCCCCAACAGCCCA  
TTGCCACTTCGCTGCAAACGGCAGTTTACAACGTCGTGGTGGCGCCAACCTTGAGATACGGTATCCAGGTT  
TGGGGAATTGCATCTCGTACAAATCGAAGACGGATTCAGACACTCCAAAACCTTGCCTTGCGCCGAATGA  
CCGGTGCTGACTGGTACGTCAGAAATTCTACCTTGCACAGAGACCTCAAAATGGAGACTATAGACAGCCA  
AGTCGAAGCATTGCCAACCGATACAACGAACGCTTGCAGCGACACTGTAACCGGGTAGCAAGAGACCTC  
GCTGGGAGGTGTGTAGTCAGGAGGCTCAAGAGAAGATCCTTTAAGGACCTCCTCCAACCACGACACAGGA  
GACGCCCCAGAGCCCCCGACTACCTACGTGACGATGCAAAGAAGACGCCTTTGACGTTTGTCCACGATAA  
AGCCTGAGGACCCAACCAGGCTTGGCGAAATACCACCTAAGTTAACTGTGTTGTAATAAAAATGTATGCT  
ATTTTTGATTCAATACAATAAACATATACAAAAAAAATAATAATAAAAGTGACAAATGACTATGTCGAAC  
AGTCTTCTGACAAAATTATTTAAGATAGGACCTATTTCAAGGAATAAAAGAAATAAGATGATTACTTCTA  
CATCGGGACCTCCAAGAAGATATAGACGACCAAAAATTCACAAGAAAGGAATATCTCTGAGACCACAAT  
GCTCCTCTATCGGTTCCCCATCAAATGAACTATACACATATATTACAAAATTATTAGGAACTTGACAAC  
AATATAACATTAAGAATTTCGTTAGAGTTCAAAGACAGAGTCAATAGGGAAGACGATATATTGGTATCTTT  
TGAAGTCGTCCCTGTTTCCCAGCATACCAATAGAACTTGTACTGTACACAAATTGAAAGGGAACAGGTAT  
TTAAAATATGAACACAGAAAATACATTCTGTAAATGGGAATGGCAATGGGATCACCGGCCTCTGCATGTT  
ACTGATAAATTGACTACAAAGCTAAAACCTTCTGGCAAATAAGTAGACATCCACTTTGTAACGTGAACGG  
ACAAAACCTGAAGTATAAAACATTCTAGTAGAGTTAAATTCTTTTCACAAGCACATCAAATTTACAGTGGA  
ACTAGAGCAATTTCAAATCTTGTCAAATTTGCAAGGAACGGCCTGGCAGGCCTTCAATAGGCACACAAGT  
GCATAAATTGTTCTATTCAAATATGTAAAGTATGTGTGAGTAGCTAGTCGAAAATATTTTAAATACACACA  
TGGTTACGCTTAGGTACCCTTACCAACGATAACGAGCTAAATTGCAAGAATTTTCGCAACGACGTGGCAAA  
CGCTTTCATTATTTTCATATTACTCGTCCCTTCAAAAGGGAAGAAAGCCACCGACTTTTGAGAAAAATTGAA  
TTTGTGGGCATTTTTGCTTATGCGGACAAATACACATACAGACAGTACATACAAAATTTGAACGAGCACT  
GATACTAAGCCAAAGCAGTTTCTTATAGTGCGAGGAAATGAAAAAAAACAACAAAGCCTTTCTATCAC  
GCAAGTCATAGGTATTTCTTACTCTCTTGCTGTCTGAGCGCGTGAGCGTGTCTCGAACCCGAAGAAAAACG  
ATCTGTCTGTCGGCACCTCTGCTGGTGACTATGAATCCTAGAAAGCTAACGCTTTTCTAAAAAATACTCGATA  
TCTCGAATGAGACCCTCATGTTTGCCTCGTGCAATCTTTTAAAGACCCAGTCCACATATTAAATGTGGGAC

TCTTCATCTTCTGAGAAGATAATTACGTCATCGACA

>Ref\_dvir\_690

CCTAATAATGATACGCTGAAAATCAAGCAAATAGGGCGACAAAGAGTCTTTGGTTGAAATACCAAAGAA  
AAATTTGAATGCCATCCTGTGCCACAGATGCCAAGAATTTGGACATACAAAAAACTACTGTATGAGGCCT  
TATATCTGTGGAAAGTGTGCTCGAAATCATCCAACAGCTCAATGCAAAGAACTTTGGTTGAGAATCTTTG  
CTGTATCAACTGCGGTGGAACCATGAGGCTTGGCATAAGGGATGCAATGTGTTCAAAGCTAGAACGCAA  
GAAAGAAGACCAAAATTAAGTATTGGATTGAAAAGTCATGTCAGTAGCAAAAAAGACCATCAGCAACAC  
ATTCCAGCATCCTTAGTGCGAGGAAATTTTTTCGTACGCCGATACTCTGCGTACTGGGCTGGAAAAGTTCAA  
TAAAGAGACGTCAATTAAGAACCCTACCCCCAAGCACCAAGAAACCCACCCACATTAGTTCAAGGCTG  
GAGGCTGCAATAGAAGCACTCACTGTGAAAGTCGACACTCTACAAGCTATGTTTAAGGAACTTCAGGAGA  
CGAATCAGTTCCTTAAACAAATGTGTCTGAGTCTATTGAACGCCAAAAAATGATGCACAGTTCCTAAGC  
CTCGGATTGTGGAATGCCCGTGGTATCTCTGGGCATGTGGAGGAGCTAAAGCACTTCCTAACTGAACATA  
ATATTGATGTGATGCTAATTACATGGCTACGGCGGTGTATCCATCTTTATTAGGCTACAAAATTCACAAA  
GCGGATCATCCTAGCGTAGAGCAAGAGCAGGAGCGGCGGTGTTAAGCAGGAGATCGAATATTTCCAAAA  
TGAAGGAGAAACAGATTGCAACTAGCCGGGGTGAATTAACCATTGCTTCGACATATCTCCCGCCGCAACT  
GTCGTGGTCAGCAATGGAGTTCAGCAACTTTTCAGCGGACTAGGAAGAATGTTCTTATGGGAGGCGAT  
TTTAACGCCAAAAACAGATGCTGGGGTTGCTTTAGAGCTAACGCAAGAGGCACCTGCTTACTGGACGCGG  
TGCAAACTCATCATCTGAAATACTAGCGACTGGACAAGCCACTCATTTCCCGTTTGCCCAAAGTTACACG  
CCGAGTGCCATTGACTTCTTTATTTATAACGGACTTCACCCAGATGGCTTAAGTATAAAGGCCTGAGTTTCA  
GCTATCCTCTGATCATATCCCCTAGTAGTTGGTTACGACTGTAAAAGGGCAAAACAATTAAGGTCGTCT  
GCTGCCTCCTGGAGCCAACATTGCTGCTTTTCGACGAGAGAGGAACTCTAGACCTAACTTGGAATAC  
TTGCACCAGAAGACATCGAAGATGTATATGCGCTATTCTGAACAAGGTTCACTCGGCACCCCTCATTCT  
GCGCCAGTAAACGACCACAAGTGAGACTTCCGCAGCAGGAGATCCAATTGTGGACAGGATCTACCGCAG  
AGTGTCGAACCGTGTCAAAAAGCTGCTGCAGCTGAATAAAAAGGGAAACCGACCGTTTTTTTGGAATGTT  
TCTCCAGATGAATCTTCAAGTCACTCCCTATGGAGACTGACGAGAAGGTACAAACAGCAAGTGATCCCA  
AATTTCCGATCAGAAAGCCTGATGGATCTTGGGGCGATCCCCAAAGAACGGGCTGATGCATTCGGATCGC  
TTCAAGCCTTTTAATACAAGCTCGGCAAGCATGAACAGAAGGGTTCACTCACACTGGAGAGCCCAGGCC  
AGCTAAGCCTCCCAGTTGCTCCTATCACTGCCAACGAAGTATCAGACCACATAGCAGCACTTAAGACAAG  
AAAAGCTCCTGGCGAAGATGGGATCGACAACATAACACTTAAAGCATTGCCGGTCAGAGCAGTCCTATTT  
TTAGTGTTAATCTTTAATGCGGTATTGAGACTGGGGCATGTTCCAAGCCAATGGAAAAAGGCGAGGATAT  
GCATGATCCATAAGGCCGGAAGAGCCCCCTCGTCCCTAGACCTCATTCAGGCCTATTAGTTTTGTTGCCCA  
CGAATGGAAAACCTCTTCGAACGTAGTCTGCT

>Ref\_dvir\_672

TAATACGTCTTGGCAGTTACACTAATTCAAAGCTGTAGCTGATCCAAAAAACGTATTGCAAATAACAGG  
ACAATGGGGAGTGACGAAACAAATCGATCTAGCTGTGTATTGTCAGGCATTGTTGACAAATGTAAAGGGT  
TATTAGTCGGGACCAGCCAGAGTGGCTGCTTTGTTGGGCGCCAAATATATAAATATATGATACATACTGTA  
ACATACAACGTATGTAAGCGAGCTGATGTCCGTGTAGCGTCTAGCGAAGCACGCGCTGGTTCCGGCACAG  
TGAAGTCGGCTGGGGTGGGTTGACTCATAAATGGCTAAGCTACCTGCTCGCAAGCTCTTATAATTATATAT  
AAAAATTTTCGCGTGCTATTAAGATGTCTAGTTCGATTGCACATTCAAACCTACGGGGGTTAGGAAAAAAT  
CTACAGAGTTACCGAAATTATATTAGATTGATTAGGGACCGTAGCTGTATATGTTGTTGTTATGCTGCGCT  
GGTATCAATGCGACAGCTGTTGCCACCCAACCATGATCACCGGGGCCGCTTGACCAGACAAATGGTCGG  
TGATCCCTAAAACAACACAGATTACATTACCCTAACATTCCGACGACGCATGGCTTCAACATAAATAAGG  
CAAATTAGCACATAATTATAAGTTCGTTACACATATTTATTTTTGTGGTGAATTAGGGAGTTAAATCGAAA  
TTTTGCTTAGCCATTATACATTTTTTTTATAATAGAAAAGAAAAGAAAATTAATAAAAAATTTATATTACA  
CAAAGATAAAGCATTTTTTTTTCTAGGTGAGGTTCTAATTTAGTCTAGGACCCAAAATTTGGTAAAAGTAAAA  
ATTATTCCTTTATTTTTTTTTTTGTTTCGACAAAAATTCATTTAAATTTTTTAATTCATTTAGCGAAAGCTGTAAC  
GCTCACTTGAAATAGATTATTTTTTTAACGTTTTCTTTTTACCGATTTTTTTTGCTTTTAAGCGCAGCATTAAA  
TTATCCATTAAATTATTATTAGGCCATTCTCTTTTGATTTTCTCGGAAATTAAGTTTAAAGAAAAATAAAT  
TTAAGAGTTTTTTTTTGCTGTACTTACATACATTCCTCCATCTCCGAAAGCGCTTCCATCGATGTAACGGGC  
GATGATCTGCTGAAAAAAAAAAAAAAAAAATTTAGAAATATTTTAAAATCTGGCTCTCACCAGCAATATGGC  
GATCCGAATTTTCGGAGCATGGAAGGAGAAAAAGGAGAGTAAAAAATATAGGCCAATGGAAAGAATATGTA  
GGGCAAGAAAAAAAAAACGGAGTTAAAGAAAAAAAAATGCGGAATAAGAATTTGACCATGCGGTTGCACTCT  
TTTGCCGAAAAAAAAAAAAAAAAAAGAACTCGCACATAACTAATAAAATTTTAAATTATGCGCTTA  
AGGCGACTTGACTACGCCCATGGCGTTCACAATAGGACTTATTCAGTTTTTTTCACTTTTTTTGTTAGCTAAG

CTAATTATTCATTTTTTCCAGCAAAAAAATAACACAAAAAATAAGATTTTCGTTTCGCTTAAAAAAA  
AGATAAATGTAGCTTGCTTGACGACGTCAGCCACAAGGAACGATTCCATCAGCGACGGCGATCGTCTCTT  
ACTATTCGTCTTTCGAACTCCCATTTTTCGAGCAGGCTAGAGAGCACGAAACGAAACAACGAGATTTGACT  
GCGATAAAGGCGATTGTAAATAGGCGCACTTCCTTATTTTTTTGAGTCAACCTTTCTCCACGGTGGACCAA  
AGGTAAAAGAAAGATCTGAGCTCCGATCGCCTTAGGGAAAGCTATTTACAGCGACACCAGGACAGACGC  
CATTTCCAATTATCAAATTAACATTCCTCTACTATTTTTTCTCTTTCACTCGTTACAAGCGATATCACGCCCCG  
GGTTGAGCCATAGATGGCGAGATCTACAAGGGTAAGCAAGGTACAAGACCTTGACTGGATTTACATTGTC  
TATTTTTTGGGCTGTTTATTTAAACTCAAACAAATTGTTCTTGCTTCAAGCGCCACTACAAT

>160\_rnd-1\_family-61\_\_Unknown

ATTTTTTCATTTTGTATTTTTTCAGCCAAATCTGCCACGCCCATGGACAACATTTNATCAGCAAATGATCGCTA  
TTCATGGTACCTAGTTGACCTATATATCCTTGGTTATTCCATATCATGGATATAGTCCTAGCGAACCTAAA  
GGACNAAGTTCTCGCAAAATGCGCAGGAACATGGTCCCAAAATATGTATGCTTTTCTTTTACAGCCGCCCC  
CAGCAACAGCCCCGCCCCCTGGATGGTTTCTAGTTGACTAGCATATCCTTGGTTATACCATACCATCGATA  
TAGTCCTTGGGAACCTAAAGGATCAGATCCCTGCAAAATGTGCATTGAAATGGTCCAAAAACATGTATGC  
TTTTTCTTTCAGGAGCCCTTTTACATTAGCTGCAGCTGCAGCTGTTGCTTAACAGCCGGCTTACAGCGCTCA  
TTTNACATGAACTGCTANTTAACAGCACTCATTTTAATTGAGTTACATTTTTTGCCCTTNATGCTATGCAAT  
GAAAATTTTTACGAAAACCACTCGTCGACCTTCTGGGCATTTCTGTTCGCCTGGTATTTNAGCGGAATTTT  
AGGGCAAATTTGGGGCCAGCCGGCGACCAAGGGCGCCCCGTNNGGGTATGCAATGAATTTTTTTCGGCAGC  
TAAAAATATTTTTTCGTCGACCTTCTGGGCATTTCTGTTCGCCTGGTATTTTGGCAGATTTTAAGAAAAATCT  
CGGCAGCCAGCGGTTGCCAACAGACGCCCCCTTGGGTNTGCAANGACCGTTGATTTTTGAATTTTTAAATA  
AAAAAACAGGAATTTTCGCTTTTATTTTAAATAATTGATTTATTTATGTTTAAATTTACAAAATTGTTGTTTT  
TATGCTAATTTTCTTAATTATTTCTCTTAAAATTATACAAATCGAGCATAAATTATAATTTTAGCTTATTTA  
AACTTAAAATAACTATATCTGGCTTAATTAAGTCCGATCCTGGAAAAATTTGCTTTGTGTCAGTCGTGGAGG  
TCCTTAGAGCTCATTGTAGTCCTTAATTTGTCAGTCTGAAANGATAAAAAACACATTTAAATTAANAAGGC  
GAAAAATATATAAAAGCATTTTATGTAGAAAAANGGCCATAACTCGGCCATATCCTTGCAGATTTTCAAA  
GGACATGGTGCCTTAGGATCGTATAGACCCCCCTGCATCGATCTGCATCAAAAAAATATGGGGTCATCTAA  
GAATCCAGGACTTGTATTTTACTTGTAAAATTTTCAAGTCGCGGAGCGCACGGAAAAATGGCCCGAAAAACA  
CAAATCCTTGATATCTCCGAAACTACAAGGACGATCTTGATGNANTTTGGCCAGTTGGTAGTCCTGGTCA  
ATACAATTTTTTTGACACAGGACTCGCCAGGATACGCAAGGATACGGCCGAGTTATGGCCTATTTTCTGTT  
CGCAAAATTGTCCTTAAAACCTTCGCCGTTTGAAGGACTTTCGTCCTTTGGGTTGTANATTCTTAAATGGGA  
GGNCGAGGACTATCTGCTGGCCAAAGGACATCCCGATAGTCCTTCAAATGGCGAAGTTAGCCCGGATTTT  
TTCGATTTTGGCCAATTTTGGGACTAACCCCTAGGAAAAATTTTCGGTGAAATTTTTTGTGCAATCCTGGA  
AATCCTTGAATGCCAATCGATAGTCCTGCTCCCCACGAGTTCAAAAAGGTATATCCTTCCGATATCCTTAA  
GGATNTGGCCGAGTTATGGCTANNTAAAAAATGTCCTTTTTTAGAAAAATTGGCCATATCTCGGAAACNACA  
AGGACGATTTTGATGTCCTTTGGCCAGTTTATAGTCCTNGTCCATACGATTTCGTTTGACACAGGACTCGTC  
AGGATCCGCAAGGATACGGCCGAGCTACGGCCTTTTTCTNTACACGAAAGAATGTCCTTATATCTCGGCTN  
CCTGAAGGACTTTCGTCCTTTTCATTGCATATTCTGAATNGGNAGGACGAGGACTATCNGTTGGCCAAAGG  
ACATCANGATCGTCCTTGAAATGGCCGATTTACGGCCGATTTTGTGT

>9\_rnd-5\_family-2924\_\_RC\_\_Helitron

TTGTTTTTGTTTTTACTTTCTGTTTGGTTGTGGTTTGTGTTATTTTTTGTTTGTTGCTCCTCTTGGTTGCAAGA  
CATTTTTTGTTTTGTGAATTGACTTTAATCACTAAGTGGCCTTTTATTTGAGATTCTCCTTGATCGGGAGTT  
GTTTTCTTCTCTATATGAACCTTCTTTTTGTTTATTTGTAATCGCCACTCGTGGCATGATTCTTTAATATTN  
TGGCTGTGTACATTTATTATACCCTGAACCCATTGAAAACGGGTATAAGGGTATATTGTATTTGTAGCAAT  
TCAAATGTATNTAACAGGCGGAAGGAAGCATCTCCGACCCCTAATGTGTATATATTCTTGATCGGCACCA  
ANAGCCGAGTCGATTTAGCCATGTCCGTCATACGAGTCCAGATCTCGGAAACTATAAGAGCTAGAGACTT  
GAAATTTAAGATGAGTTTGTTCGGTAATCTAAAAACACTCCGTNTCCAAGCAATCGGTAAGAGTCGAT  
ATCGANATCNTNTTTTCCGAGTTTAATCCACAATTGTGTAAACNACTTTTTTGCAGAATACACAAACANTN  
TATGGCACANTAANATNTACTATAGACANTTCCNTTAAGATCGGTTAAGAAAAAAGTACCT  
AATTATTGGTGTGGCTGCTGAGTAGAGGCATAGCAAGTGGTGCGGTCTGTGCGGGTTTAAAGTCCTACCG  
GTGTAGTATTTTTTTTTTGTATTATTGCTGGTATAGCTGTTGAGTAGAGTTCACAGCAAGTGATGCTGTCAGG  
GTCAGTTGCGAGTTCGAACCCTGCCAAGGCAACCTTTTTATACCCTTGACAGAGGGTATTATAATTTTGTGCG  
CGAAATGTGTAACGCATAGAAGGAGACATCTCCGACCCCATAAANTATATATATTCTTGATCNGTATCAA  
CAGCCGAGTCGATATAGCCATGTCCGTCTGTCCGTCTGTCTGTTTCTATGCGAACTAGTCTCTCAGTCTTAA  
AGCTATCTTGACCAAACCTTTGCAGAACTCCCTCTTTCTGTTGCAGGCAGCATATATGTGAAAATCGGTCAA

GATCGGACCACTATATCATATAGCTGCCATAGGAACGATCGGTCGAAAATTAAGTTNTTGTATGAAAAAC  
ATTTTGTATTATCAAGATATCTTGACCAAACCTCGGCATTTATTAGTTTTACTATGCTTCTCATATATATGCGA  
AATCCCGTTAAAAATTAAGTTTTTTGTATGAAAAAAACATTTTGTTTTTTTCAAGATATCTTGACCAAACCTC  
GGCATTTATTAGTTTTTACTATGCTCCTCATATATATGCGAAAATCCTATTAAGATCGGACCACTATATCAT  
ATAGCTGCCATAGGAACGATCGGTCGAAAATTAAGTTTTTGTATGAAAAAAACATTTTGTTTTTTTCAAG  
ATATCTTGACCAAACCTCGGCATTTATTAGTTTTACTATGCTCCTCATATATATGCGAAAATCCTATTAAGAT  
CGGACCACTATATCATATAGCTGCCATAGGAACGATCGGTCGAAAATTAAGTTTTTGTATGAAAAAAAC  
ATTTTGTNTTNTCAAGATATCTTGACCAAACCTCGGCATTTATTAGTTTTACTATGCTCCTCATATATATGCAA  
AATCCTATTAAGATCGGACCACTATATCATATAGCTGCCATAGGAACGATCGGTCGAAAATTAAGTTTTTC  
GTATGACCAAACCTCGGCATNTACTAGTTTNACTATGCTNCTTATATATGGGCAGAATCCTATCAGCATTAT  
GAAAAGGTTGGGTCTGGGTATTAGATCTTTGGCGTGCCGAAGATAGCCCTTCTTTCTCGTTTTAAATTTATT  
TGGTGTGGAATAAGANGGTTCCCTTAGTCGGGAGCTCCCGACTAGAACCTCTTACTCTGTTTTTATTTGTG  
GTCAGTCTTGAATAAATATTTTATTATTCAGTGTGTGGTTAGTTGCGTTTTTCTTCACTATGTGAATTTTTTT  
ATATTATGGTACATAGTGTGATTAGGACTAGGAC

>9\_rnd-4\_family-690\_\_RC\_\_Helitron

TCATGATAACAATCCAACCTTTAAAAGATTTAAATCATTTTATACCGCGGATTTTATACCCTGAACCCATTGA  
AAATGGGTANGAGGGTGCATTGTCCATTTGTGCAAATGTATGTAACAGGCAGAAGGAAGCATCTCCGACC  
CCATAAAGTATATATATTCTTGATCAGCATCAATAGCCGAGTCGATCTAGCAATTGTAATAGCAAAAGAT  
CGTCATGGGTAGCCCTAGCTATGTTATGATAGTGTGCTTATCAATGTTAAGTAAAACAGCATCATAAGTGT  
TTATCGATATTACGTCTGTCCGTCCGTCCGTACGTATGAACGCAAGGATATCAGAACCTATAAGAGCTAGA  
GACTTGAAATTTTAGATGNAGGACCTCCTATTGCCTGCGCAGATCGAGTTTGTTTTTCGATATTAGATAACT  
TGCCCCGTTTCCAAGTAATCGATAAGAATCGATATCCGTTTATTTTGAACAATTTTGGTAAATANTAAGAG  
CTAGAGTCACCAAACCTTGACATATNGCTTCTCGANTAGNATGTATCAAGTATCCTTCATTATCTCTCCGCT  
ACTACCTCATAGCTATAAATCAAGGTAATAAAACCAATATACAACACAAATAAATGCAATTGACTTTTTTG  
AGAATACAAAAATATTCTATGGCAGAATGAAATAAATATACCGTAGAGAATTTAAATCTAAAATNAAGAC  
CGGTAAAGAAAAAACCAAAGCTNCTGTTTTGCTGCGCACATTCGATGGGGCAGCTAGCGCAAATCGCAA  
AATTTCTTTATACACACACACACATTTCATGCGCGTCCGCTTCGAATTCTATCAACAGCATTGCAATCGC  
GATTGTTTTCGGTGCTGCTATTTTAATTAGTTTTTCTCAATAATACACAAATATTGGTATGGCTGTTGAGTA  
GAGGCATAGCAGGTGGTGGGTCTGTGCGGAGTTCGANCCCTACCGGGGGAAANTATTATTTTTTTTTNTTC  
GCTGGTGTGGGAGCTTTTTTTCTTAAGATATCCTTTTTTACTTAAAACAAGCGCGTTGCGGAGAACTTCATTTT  
GTGTTGGAATAAGACGGTTCAGGGTATCCCCTAGTCGGGAGCTCCCGACTAGAACCTCTTGCTTAATTTGT  
TTCTTACCTCCAAAATTGAATAGGTTATTCTTTTAGTTAACATAGCTGTTACACATAATTATTTCTACTATT  
TTATTACTTTTAACTTGGAATTGCATATCCTCTTTTTTATACCCTTGCGAGGGGTATTATAATTNTGTCGTGA  
NNTGTGTAACGCATAGAAGGAGACATCTCCAACCTCAGTACACAAAATGCATTCATATATCAACACAAAT  
TTGGGATAGGTCATGATCTGCGCTAGAAAACCTAACAAAATTAATTTCTTGCCAGCTAAAGCCAGAGCAGT  
GAATAACAACACATACATACTTTAAAGTTCTTATGCATGTATAATTCACGCATACAACGAAAGGTG  
CACGCACGCTATTGGCTGAGACAAGAACTTTTCTCGAGCATACACTGTCCAAAAAGAAAAGTGAAATCAA  
TCTATGTGTGCTATTTTCTTAACATAGTTATTGCGCAAGAAGCGCCTTGTGTAAAAATTATATAAGTTCTTA  
AATTTTCTCTGTAAAATTAATCGTTAATATCTAGGGTAATATATCATTTAAATAAAGCATGCATTTTCATGGA  
TAAAGCACAAAGCACTTTGCGTCGATCGTAAGTTCTAAACTTTTTCGCTCAATGTACTTCGAAAACGAAGCG  
ACGCAAAGCAGCATCGACCAGCTTTGCTGAAGGCAGGCTGGCGACTAACTTCGTAGCTCGTGTGAGCATC  
AGCAAGCCGCGACTTCGGCATTCGTTCTGCTGTTTGGAGAACGAACAACAGTCGGCAGGCATGCCG  
TACGAAGCCTCAAAGGCCAGATGAAAGGCCAGGCTAGAAATTTTGGCTGCGATTCAAATGTATGGGCGTT  
ACTCATCTTAGTGTTTATATTGTCTTTGGT

>9\_rnd-5\_family-2101\_\_LINE\_\_I-Jockey

AGTAACAACAAAAGTAGCAACGGAAATACCTNCAACAACAACGNGCTGCAACCGCATGGGAAGNAANA  
AGCNANAANACAAAAANAAAATNATTACAACAAAATACGTCGAGGGAAATTAATCTGGCGGAGGAAAC  
ACAAAGGTATACTGAGTGAGTAAAGGTGTTTTAAAAAGTGTTTCGCAAATGTCCATACGCATCACATTAGA  
TGAGTATAGGGCAAGANGACTAACAGCCAGTGCCCCGGCCGTCAATNAAGAAAGCGTTGGAAAAAAAC  
CAAGAAATCGTGGCGGCATACGGCTGCGTATTAAAAAGCGCAAAGCCGAAATATGCNAGNTATTATATA  
ATAGCACAAAGCCCCCGACTTGGGAAAACGCGAACAGACTAGCAAGAGAGCTAGATTTCTCACAGAGG  
AGGAAGAGCGCAAATATAAAACACAAAACACCTTCTCCTCAACACATTAATAAAATTTATTAATAAACTTC  
ACCGCCAGAGANAAAGAAGCTGCCCAACGAACAAGAAGTGCCCTGACGACTGCGCTGGACCACTGTAC  
ACCCCGGCCTGTGCGACGACCTGCACCGGCAACGCTGACCGCTCCAAGGCAGCCAAATAAAAAAGGGAA

CAACACGACATCTTCACGCAGCAGCAGCAGAGAAGAAGCAGCATTATTTAAAGATAATATTAANACTTTATA  
TAATTTGTAATGACGCCCACTGTGTTGTGTGCGTCAAGGCAGAGTACAACCTAAAAAGTTGTACGACACA  
TTAGAGAGGAGATCACTGCGTTGATCGAAGTAGGATTATTATATATTAATATACANAAACGGAAAAGGCC  
TTCTGCCAAAAATATATATTTTAAATGAAAAAAATTTTCCAAATCGATCAAATTAAGGAAAATTTGAAAAA  
GTAATCTAAAAAGAAATTAGATGAAGTTATATATTTGTGTTTCGTATTTGTATGGGNACTTCAAAAATNGA  
AAAANAAAATTTTTTTTAAATAAAAAATAAAACTCTCGATANAAATACATGCCCCGTTNGCTTCATTAGG  
TGTTTGAACAATAATGTACATTCAACGTAACACTTCGCAACACTTCGTAAATACGTCATGGTTGAAGACAA  
GATCAATCAGGTNTACAGAGACAATCCAAACTTTTCGTATGCGAGCCATACANATTTTTGAAAGGCATAGG  
GAATTCATACGAGTATATGAATTCGAAGATGAATATGTTGAAACATACGGAACAACAAGCCCACTGT  
TCTCATGTTCTGAAATAGAGAGGGGAATAGTCTTGCCTAATCTACCATACGAAATCATAAAAACCAAGTGT  
TGACGAGCATNCCATCCTAGGGCNAACACCNATTCTTCTAATACGTCTGCACGGGTAGAAAAATAAGAGA  
GGCATATATGTATAATTAACAAAAAACAATAAATATGGGTGGAAAAACAATTAAGGCAGATGATAACA  
CTGCCAATGTAGTTAACGTAGTTGAAGTTTTAGACACCACCCCCCATGTGCAGTTAACAAACATACTGTTA  
ACTATACTCTTTGTTGTAGCCTCAGTTAACATCCTTCTGAAGATTTATCTTCTGCATAAAAAATTACTGAAA  
AAGCGGTACATGAGTCCAGCCAACGACTTAGACAAGGTCTAAGCCGCCGCTTAAATACAAATTTGAATAT  
GCCAGATATAGACGCATTGCGCTTACGTATAGAGATGAGCGAGATCTTCGTACTCGCGCACTAAAAGTGC  
AGCGACTACGTAAATTGACAAAACAATGGCCCCAACAGCTATAAGTTTTCTTAAACTATCCTCATCGCTCT  
TGCCAGACTTTGATGGAAAGGCAGAAAACTTACAAAGCTTCAATGATGCTTTCAGTCTTATAGATTACTAA  
AAGAAGATCATGAAGCAACAGCTGTCANTCTTATGAAGACAAAATTAAGGCCATGAACGAAACTTCG  
TAAGCGATGAAAAACAATCGCCGAAATAACATCAAAA

>9\_rnd-1\_family-60\_\_RC\_\_Helitron

AAGATATCTTGACCAAACCTCGGCATTTATTAGTTTTACTATGCTCCTCATATATATGCGAAATCCTATTAA  
GATCGGACCACTATATCATATAGCTGCCATAGGAACGATCGGTTCGAAAATTAAGTTTTTGTATGAAAAAA  
CNTTTTGTTTTCAAGATATCTTGACCAAACCTCGGCATTTATTAGTTTTACTATGCTCCTCATATATATGCAA  
AAATCCTATTAAGATCGGACCACTATATCATATAGCTGCCATAGGAACGATCGGTTCGAAAATTAANTTTT  
GTATGAAAAACATTTTTGTTTTTCAAGATATCTTGACCAAACCTCGGCATTTATTAGTTTTACTATGCTCCTCA  
TATATNTGCGAAATCCTATTAAGATCGGACCACTATATCATATAGCTGCCATAGGAACGATCGGTTCGAAA  
ATTAAGTTTTTGTATGAAAAAAACATTTTGTTTTTCAAGATATCTTGACCAAACCTCGGCATTTATTANTTTT  
ACTTTGCTCCTCATATATATGCGAAATCCTATTAAGATCGGACCACTATATCATATAGCTGCCATAGGAAC  
GATCGGTTCGAAAATTAAGTTTTTGTATGAAAAAAACATTTTGTTTTTCAAGATATCTTGACCAAACCTCGGC  
ATTTATTAGTTTTACTNTACTCCTCATATATATGCAAAATCCTATTAAGATCGGACCACTATATCATATAGC  
TGCCATAGGANCGATCGGTTCGAAAATTAAGTTTTTGTATGAAAAACATTTTGTTTTTCAAGATATCTTGAC  
CAAACCTCGGCATTTATTAGTTTTACTTTGCTCCTCATATATATGCGAAATCCTATTAAGATCGGACCACTAT  
ATCATATAGCTGCCATAGGAACGATCGGTTCGAAAATTAAGTTTTTGTATGAAAAAAACATTTTGTNTTCA  
AGATATCTTGACCAAACCTCGGCATTTATTAGTTTTACTNTGCTCCTCATATATATGCAAAATCCTATTAAG  
ATCGGACCACTATATCATATAGCTGCCATAGGAACGATCGGTTCGAAAATTAAGTTTTTGTGAGAAAAACA  
TTTTGTTTTTCAAGATATCTTGACCAAACCTCGGCATTTATTAGTTTTACTNTGCTCCTCATATATATGCAAA  
ATCCTATTAAGATCGGACCACTATATCATATAGCTGCCATAGGAACGATCGGTTCGAAAATTAAGTTTTTGT  
ATGAAAAAAACATTTTGTTTTTCAAGATATCTTGACCAAACCTCGGCATTTATTAGTTTTACTATGCTCCTCAT  
ATATATGCGAAATCCTATTAAGATCGGACCACTATATCATATAGCTGCCATAGGAACGATCGGTTCGAAA  
TTAAGTTTTTGTATGAAAAAAACATTTTGTTTTTCAAGATATCTTGACCAAACCTCGGCATTTATTAGTTTTAC  
TNTACTCCTCATATATATGCAAAATCCTATTAAGATCGGACCACTATATCATATAGCTGCCATAGGAACGA  
TCGGTCGAAAATTAAGTTTTTGTATGAAAAAAACATTTTGTTTTTCAAGATATCTTGACCAAACCTCGGCATT  
TATTAGTTTTACTATGCTCCTCATATATATGCGAAATCCTATTAAGATCGGACCACTATATCATATAGCTGC  
CATAGGAACGATCGGTTCGAAAATTAAGTTTTTGTATGAAAAACTTTTTGTTTTTCAAGATATCTTGACCAA  
ACTCGGCATTTATTAGTTTTACTATGCTCCTCATATATATGCAAAATCCTATTNAGATCGGACCACTATATC  
ATATAGCTGCCATAGGAACGATCGGTTCGAAAATTAGGTTTTTGATTAAAAACNTTTTTGTATCAAGATA  
TCTTGNCCAAACTCGGCATTAACATTTTTCCCTGTGCTTCTTAGATACGGGCAAAGCACTATAAGCATTAT  
GAAAAGGTTGGGTCTGCAAGGGTATTAGATCTTCGGCGTGCCGAAGATAGCCTTTCTTTCTCGTTTT

>9\_rnd-1\_family-46\_\_RC\_\_Helitron

ATATCCAATAGCTCTTTTTGCTATTCTAGCTGAAAATGTCTCAATAGGCAAACGCGTACAGTTTTTTTCGAG  
CATGATACTGCAAGTGAAATTCGGTGAGATAGAAAATATGTAATTTGTTTTTAGATTATTCCTATCACAGT  
GTTGTCTTTTTTGGTATGATGGACAGATTTTTGTACATTAAATTCAAGATGTATATAGGAAAATATCAATC  
TCTTTGTTTAAATATTTTTGTGGTCCTGAAAAGGACCGATTTTTTTTTATATTTATGTATTAGAGACGAGGTA

GACTTAAGCGCGCTCCCCACGAATACGTCTGGCCAGTTGAATGTCCTTGGGCATGATGGTGACACGCTTA  
GCGTGGATAGCACACAAATTTGTATCTTCGAATAGGCCAACTAGATAGGCTTCGCTAGCTTCCTGCAAGG  
CCATCACAGCCGAGCTCTGGAAACGTAAGTCGGTCTTGAAGTCTTGAGCAATTTTCGCGTACTAAACGCTG  
GAACGGCAACTTGCGAATAAGCAGTTCGGTGCTCTTCTGGTAGCGACGAATTTACGCGAGGGCAACAGTG  
CCTGGCCTATAGCGATGAGGTTTCTTCACACCACCAGTTGCTGGAGCACTTTTACGTGCTGCCTTAGTAGC  
TAACTGTTTCCGAGGGGGCCTTTCTCCTCAGTTGATTTACGAGCAGTTTGCTTAGTACGAGCCATCTTTCTTTC  
ACAATTCCAACCTTCACACTGTCACTGTTAAAAACACAATAATCGTGCGTCTCGTTTGTGTATCGCTTATAT  
AGAAAATGAGTGATAAGTTAGAAAGAGATCGATATATTTCGCTGTTTCGTCGCTTTGCCGAATATGTTACGA  
GGGTAGTGTGTGAGCGAGATGGAAATATTCTTGTAATCTTTTCGAGTTTTGGATATTTTTTGGTATAAATATA  
AGCGCTGCCCCGAAGAGCTAGCATTAGTACCTCAGTGACATTTCGTGGTGTAAAGTTAAATAAAAAATATAA  
AGTGAAGAATGACTGGTCGTGGTAAAGGTGGCAAAGGCTTGGGTAAAGGCGGCGCNAAACGTCATCGCA  
AAGTGTTCGTGATAATATCCAGGGCATCACGAAACCAGCTATCCGGCGTTTAGCTCGTCGTGGTGGCGT  
AAAACGTATTTCTGGTCTTATTTATGAGGAACTCGCGGTGTTCTAAAGGTTTTCTTGGAGAATGTCATCC  
GTGATGCGGTCACATACACCGAACACGCTAAGAGGAAGACAGTACACAGCCATGGATGTCGTNTATGCGCT  
GAAAAGACAAGGCCGTACCCTGTACGGTTTTGGCGGTTAAAAAGAAAATGTAGAATTTATGTTGACACCA  
ATCGGTCTTTTTTCAGGACCACCAATCCGTTTTTATTAAGAGATNAAAAACATTAATNATTCAACACTAAC  
GAAACGTGATGCTGTTAAGCGTCTCCAACCTCAGATTCTGAGATCGACCGTGATCACAGATGTTTCGTTTTT  
TTATACCCTGAACCCATTAAAAATGGGTATAAGGGTATATTGTATTTGTGCGAAATCCAAATGTATGTAAC  
AGGCAGAAGGAAGCATCTCCGACCCCATAAAGTATATATATTCTTGATCAGCATCAATAGCCGAGTCGAT  
CTAGCCATGTCCGTCTGTCTGTCCGTCCGTCCGTCCGTATGTATGAACGCAAGGATCTCAGAACCTATAAG  
AGCTAGAGACTTGAAATTTTAGATGTAGGTGCTCCTAGTGCCCCGCGCAGATCGAGTTTGTTTCCGATAATC  
GATAACTTACTCCGTTTCCAAGCAATCGATAAAAATCGATATCGATATCCTGTTTTTTGGGCAATTTTGGT  
AAATAATAAGAGCTAGAGTCACCAAACCTTGACATATAGCTTCTAAAATAGAATATATATATGCATTTGAT  
GTTGGAAGAAGAGGGTTCAGGGTATCCCCTAGTCGGGAGCTCCCGACTAGAACCTCTTACTTGTTTTT  
>Ref\_dvir\_39  
TCGCAGCCAGATCCAATTGTGCCCAAACACACCAAATATGCCCATTTAACAATAACAACACAGCCGATTT  
ATATTGTGCACTACCAATAATAACACTTTTTCTCTATCCCAAAATACCCAGCATACCAAAAGTGCGCATT  
CCGGAGCCAAATCGGAACATTCTCTCTGAGATAAGTATCTAGCCGAGGACTGCCAGGTGAGTTGAAGCTG  
GACTTTGTGCCCAAGCAGTAAATTTACATGTATGGTGCCTGGCTAATACCTTTCTATATTCAGATCGTCC  
TAAAGAGCCCAGCATTGCCAACCTCATGATCACCAGCCAATTTAAATGTAAACAATGCATTTGCCTGCTGC  
CGATCCAAAATATGCTTGTGTGTAAAATGTGCGCACACGCATATGAGTTGCAATCGCCCCCGCTCCAGCG  
GATACCACCAGATGCCGGCCTAAAATGAGACTGCGCTGAAGGTGATACCGCTCCAAAGGACTCAAATCCA  
TCTCCATATCCCCACTCGTCTCAAAATTAGGCCATTTAAATTGTTTATCTATACCCTGTCTGCTGCTGGCCA  
CTGCCATGCAAATCAATTTGTTAGCCAATATTCCATAGGCCCAATTAATTGTACATACACTTGCATACCCA  
TCTCTGGGCAAATGTGAGTGTCTGTCTACATACAAATTTCAAACCTTATTCCAAAATTTAATGCATTCCCAT  
ATATGTATAGTTTGAATAGGCCCGTCTCAAAGTACCAATCTGTTTAAATTTCTCAATTCTGATTGCCATGT  
CATACCAGATACCACAACCTCAGCCAAAACGAGCCAAATATCAGCCACCTGACCATCAAACAACCTAGCTTC  
AGCTAAAACAAACGCCAAACCACTAACAATATGCAAAACAAGCTATTTACAAACATGTATAATACAAAA  
AGAAGCCATCTACAAACATGTATAATGAGAATGAAAGCCAAGGGTGGGTGCATGTGAGGAAACATAGTG  
GTGCAGTGCCTCGTGTACGGCATCGCTATCACTGACAGTACCTACCCGGAAGCTCTCGACCCCGCGACTGC  
CCCAAACCAGCCGCAAACAGCACAGCCGATTTATATTGAGCCTAAAATCCATATATGCCCATTTAAACCA  
ACATACAACCTGCGCAGCCAGATCCAATTGTGCCCAAACACACCAAATATGCCCATTTAACAATAACAAC  
ACAGCCGATTTATATTGTGACCCGCCAATAATAACACTTTTTCTCTATCCCAAAAACACCCAGCATACCA  
AAAGTGCGCATTCCGGAGCCAAATCGGAACATTCTCTCTGAGATAAGTATCTAGCCGAGGACTGCCAGGT  
GAGTTGAAGCTGGGACTTTGTGCCCAAGCAGTAAATTTACATGTATGGTGCCTGGCTAATACCTTTCTATA  
TTCAGATCGTCTTAAAGAGCCCAGCATTGCCAACCTCATGATCACCAGCCAATTTAAATGTAAACAATGC  
ATTTGCCTGCTGCCGATCCAAAATATGCTTGTGTGTAAAATGTGCGCACACGCATATGAGTTGCAATCGCC  
CCCGCTCCAGCGGATACCACCAGATGCCGGCCTAAAATGAGACTGCGCTGAAGGTGATACCGCTCCAAAG  
GACTCAAATCCATCTCCATATCCCCACTCGTCTCAAAATTAGGCCATTTAAATTGTTAATCTATACCCTGTC  
TGCTGCTGGCCACTGCCATGCAAATCAATTTGTTAGCCAATATTCCATAGGCCCAATTAATTGTACATACA  
CTTGATACCCATCTCTGGGCAAATGTGAGTGTCTGTCTACATACAAATTTCAAACCTTATTCCAAAATTTAAT  
GCATTCCCATATGTATAGTTTGAATAGGCCCGTCTCAAAGTACCAATCTGTTTAAATTTCTCAATTCTGAT  
GCCATGTCATACCAGATACCACAACCTCAGCCAAAACGAGCCAAATATCAGCCACCT

>9\_rnd-5\_family-1253\_\_Unknown

TGCGTCCTTTAAAATAAGTGTTCGCCAGAAATATTTACTGACATTTGTTGTAAAGAGTTTTGGCCGGAGC  
ANTTAATAGTAAAAGAATATAAGGCCAAAAAGAAAAATCGGACTCCGATTTTATTACCACCTATTTCTAG  
TGGCGCANCAACTTTAGTTGCTGCGTCAAAAAACTAATTTCTTCTTTTCGAGCTTGCCTACCAGAATGTTAG  
AGGTCTTAAATCTAAGCTCGCTAACCTGTATTNAGACTCTTTAGCTTTTAATTTTCAAATNATCGCCTTCAC  
TGAGACCTGGCTGAAGCCGGACATCTCAGACTCTTCAATTTTACCTCCAAATACACCACCTTACAGGTGTG  
ATCGAGCTTCCCGNATCGGAGGAGGAGTACTCATTATAGCTGTCGAGTCTGCTCTTTCGTGCGGAACGCATT  
GATCTTCCCATCTCAGAGATTGAGTTGGTGGCTGTAAGAGTTGTATTTGGAAGTTTTTCTATCTTTATTTC  
TGTTCTTATATACCCCTCTATCTAACTTGTCCACCTATCAAACCCATCTTAATGCTATTAAATCTATCTCC  
TCCCTACTTTCTGATAGAGACCTTTTAGTAGTTCTTGGGGACTTTAATCTTCCAGATGTCGAGTGGTCATCG  
CCATCAGACTCAAACCTTTCTGTTGCCGTCTTCGTCAAACGAATTTATTGATGGTCTACATGAAATGTCCTTA  
CGGCAGGTAAATCGTGTGCGCAACTCAAGAAACAGATCTCTTGATCTNATTTTCGTGTTGGATTTCGTTCAA  
CAGTGTGTGTCACAGGATCAATCCGCTTACACTTCCTGAAGACCCTTTTCATCCAACTCTGGAAATGGTCA  
TTGATTTACCAGCCCAGTCCCTATCAAGGANCCGGAATTAGCTGAACGTACGCGTTGTTTCCGAAAGGCT  
GATTTTCATAAGCTAAATGATCTTATTCTGCAAGTCGACTGGTCCCAACTGTACAATTGTGCAGACATTGA  
TGTTGCCATTAAACTTTTTTATGATACCTTGTACTCGATTTTTGATGTCTGCGCTCCTCTTGATCACCCAGC  
GAGGCCTGATAGGCCTCCCTGGTTCTCAAATGAACTTATGAGGTTAAAAAACGTGAAGTCGAAGTGTTAT  
AAAAAGTTTAAAGAAATCGGGAAATCACTCTGATTTCTCCCGTTATGCAGTTGCCCGATCGAATTTTTCCAC  
TCAAATTCATCTGTTATAAGGATTACCTTCGGCGTTGTCGCCTTCAATTTTCACATAATCCTAAGCAATT  
TTTAACTTTGTCAATTCTAAGCGAAAGACATATATTTTGCCTTCTTCGGCTAAGTTTGCAGATGAGAGCGC  
GAACACTGATCCAGGCATAGCCGATCTGTTTCGCAAACCTTTTTTCAAACCTACCTACTCCTCCTCTAGGTATA  
ATAAAAATCAGCCTTATCCTTATCAGTTGCAGAGGTCAAACCTGCATCTTAAATCCCATTATTACCGAAAGT  
TCGCTTCTTAGCGACCTTAACACTATCAAGCCGGCTTACTCACCGGGCCCTGATGGTGTTCCCTGCTTGCGT  
GCTTAGATACTGCGCTGCAGCATTATGTAAACCTGTTTTAAACTTTTTGAATTGTCCGTAAACACTTCATC  
TTTTCCGACCATTGGAAGGAATCATAATTATCCCTCTCCATAAGAAAGGGAGTAAGTCCGATGTCGAA  
AACTATAGAGGTATTTCAAATTATCCGCTATACCTAAAGCTTTTGAGAGAATTATAACTTCTCAACTGCA  
ACATTTATGTAGTTCTATTATTTACCTTCCCAGCATGGGTTCGTGAAGCGCAGATCTACAACCACTAACC  
TTCTTGAGTTTACTTCGTTTGTAATTGATGGGCTTAAGAAAAGAATGCAGACTGACGTCATCTACACTGAT  
TTCAGTAAGGCTTTCGACTCTGTCAACCACTCCTTGCTG

>160\_rnd-5\_family-170\_\_LTR\_\_Pao

CTAAGGCGGCTCCTTTATGCATCAATTGCCTTCGGAAGGGGCACACTGTTGCCAAATGTAAGGCCAAACAA  
GTGCAGAGTATGCAGTCGTTCTCATAACACACTGTTGCATAGATACTCTGCCGTTTCTAACACTCGAGCGT  
TACCACCACCCCTTGACTCCGCACAGGATCAACCATCGACTTCACATGCTATGCATGCGAATGTGTCTGAT  
AGTGTAATCCTAGCTACCGCAGTCGTTAGCGTTAAACGAGAAGTGGCGAGTTCGTTTTGGCTAGAGCTTT  
ACTCGATTCTGGATCACAAATTAATTTTGTAAACAGACGAGCTAGCACAAACGATTGCAGCTGCGTAGAGAA  
GAGGCTAGTATCAGCTTACTTGGGATTGCTCAATGCAATTTCAAGCTACGGAAGATCGACATGCTCATCGC  
CGAGACAAAAGACACTTATTGGCTGGATTGTATCAGGGCGTTACACGCCGTCAAGTCGTGAGAAGACTCA  
TGCTGTCAATCTGAGTTGCCAAGAAGAGTCTTATACCTCGATAGACAAAACATTGCAGAAATTTTGGTCAT  
TGGAAGAGTTGCCTTCAGCCAAAAAGGTCCGAACAGTTGAACAGCAGTTATGTGAGAGCCACTTTCTAGA  
TAATTTGGAATACTGCCGTCAGGTCGATTTAAAGTAAGACTGCCATTTAAATCAGATCCCAATCAGCTTG  
GTAACCTCTTCGAGGTTGCTAAGCGTCGTTTTTTGTGCGTTGAAAGACGCTTGTCTCGAGATCCCGAGCTT  
AAGCGCATGTACTTGGAATTCATGGAGGAATATTTAACGTCGGCACATCGTCTNAAATTGCGTTGAATGA  
CCTTCTAATGGTTGGACCGACCATTCAAGAGGAGCCNNACTCGACTCTGCTTCGATTNGACTCCACAAAT  
ATGCGTTGACAGCTGACATCAAAAAGATGTATAGGCAGGTCATGGTGCATGAAGCAGATCGAGATTCCAG  
CTCGTAGTGCGGAGAAAGAACCCATCTGACTCTCTGAGGTCCTTCGGGTAAACACCGTAACTTACGGCA  
CTGCGCCTGCCCCGGTTTTTGGCGATGTTNAACAAAGCTTGCTNACGATATGGGGTGCAACTTTCACGTGCA  
TGATTTACTAAGCCTGGTGGCGTAGAGAACCTTCAGACGATTGAGTCTGAAGCGTCGCAAACACTCCAAA  
GGTTTCGAACTAACCAATGGTTTTTCGAATTCTCCTGAGTTCTCCGCAACAAACGCAGCTAAGCCGATCNC  
AGNGTCTGACACAAAACACTTGGCGTGTTGTGGTTGCCGAATGNAGATGCCTTTCAATTCAAGNTNGACG  
ATTCATTTTCATGGGCCTTAGAGCGACAAAACGGAACATTCTCTCGGTGACATCGAGGCCGTTTGACCCGCT  
TGGCCTGTAAAGCCCTCTGATAATCAAGGCCAAAAATCCTACTCCAAGAGCTCTGGCTTCAGAAGTTAGACT  
GGGATGAATCTNTCCCTCAGAGTTCGGATAGTTTCGTGGCGTGAACCGTAAAGATTGGGTTCAGTCACATC  
ATTCGTCTTTGGCAACATTTGTGTGCAATCGAGTGGCTGAAATCCAAGAGTGGACAGAGAACGCAGAATG  
GCGCCATGAACCTGCAGAGCAAAAACCCAGCAGATGTCTTTTCGAGAGGCCGTCGATATTGGCGAGTTACT  
TGCGTCGATGTGGTTCGATGGACCTTCATTTTAGATGGAACAAAGAAAATCCTGGTTCGGTTAACCCAGCATC

TGATGACAGATAGCTGTTGCACTTGCAGCTATGATAGACCAACCAGATATCTTGGAACTATCGGTAGTTT  
TTCATCACATGCCAAGCTGCTGAGAGTGTTTTCTTATCTGTTCCGCGCTCGACAAAAAAGAGGCTTTCGAA  
AAAAAAGTTGAAGTCAAGAGCTCCGCACTTCGGGAGTTTCTGGAAGGCAAGT

>9\_rnd-1\_family-430\_\_Unknown  
ACCACTAACCATAACAATGTATAGACATACCAAATGGCACTTTTAATCGAAACAAGAAAAATCGAAACGAG  
GCGACCCCAATGGTACCTGCGACCATTTTAGTGTGCCCAGACAGAGTAAGACTGCTGAGAGTGGCAGCCG  
AACGCCGGCCTCAAAAGCCGAACGTTCAAGTATGAAGCCGCATCTCGCTCAGCGCACAAACGTCGCGGCTGA  
TGCCTTTTCTTAATATATGTATGTATGCCATTTTAAATCCTTACAGCCCCAAAAACATATATGTGTATGCAT  
GTGCCTCGCTCTCACTCATTGCTTCGCGCACTTGGGTCCATCTCTTTCTCCCTGCATAGCTTCCCACAAAAC  
CCCGAGATCTACAAACATTCATACGTTTGTGTTGTGTGGATGTGCGCACAAGTAGATCGCGGCGTTTGTGCG  
CGAGCCAGAGGTTATTTCTTCAATTGTGTGCCTTTTGTGCCTGTGGTAGCAATAGGCACTCACATTTAAAT  
GCTCTATCATGTATTTCTTCGTCCAGTCAGGCATGATGAGAAGAATTTGATCAAATTTTATTTAATACACA  
ATTAATTGACCTAAATAAAATATTTATATTTATTTTCTGTTTACTGTAGGGACCTATTTTGCTTAAATACA  
AAAATATCTAAGTCGTATTTCTGCAAGGGTAATTCATCGTCGGCTTGTGCAAGAATTTAAGAAAAGACCA  
AAAATTGACGCACACTCTTTCAAGTAAGCAGTTGTGTGAAATTATTAAGGGTTTGGCCTGTTTCATGTGCA  
AAATTGCTATTTTCCATGCTTGTGTAGGGGTAAAGGGTACCTGATCGCTGGCATGTGTGCATGATAACTTT  
TTGGGTCGGCCAACCACGCACACTAACACACTTTTCTATATGGATGGAAGCATTAAATGCGTTTGTGTGCGT  
GTTGGTTGCCTGCCTGCCTGCCCCGATGCAAATTTGACAAAATTTGAAGTTTTTGGCATTGTGAATTTGCA  
GCTCTAACACACACACATATACACACNCACAAATGTGTGCGAATGAGCTGATCAAGGGTTTGTGCTGAGG  
CAGAGATATTTTATCAATGGGTGCGTAAATTTGGGCGACTGGCACGGTCTTTGTTTTTTTGGCATGCCTG  
CGGTGGGCTTGAATGAAACAGGTGGATCGCACTTGTGCTCGTTTGCATTTGATATGGAACAAATGCAA  
GTAATCTTTTATTGGCATTATTATAATCTTAGGTTAAAGGGTTTTATGACAGGCAATTAACGATCAGAATG  
TATAGCATGCGTCTGGATCCATACCATTTTCATTGCCTTTTTATACATTTGTGCCTTTTGCGGCTGCAAGCC  
CACGGCAGGCATGCCAAAAAATAAGTTGCCTCGGCAGGGTTTGAGCTCGGAACTAACCGCACCACTTGC  
CATCGCCTCCACTCAACAACCACAATAAAAAATCGAGTATAAGTGAGAAAAANAACAACGGAACGGCTT  
CCTTCTACCTGTTACAGACATTAACATTTTGCATAAATACAATATACCCTTTTTTCCATTTTCAATGGGTTC  
AGGGTATACAAAATACGGACAACAATAACAATCGCAATTATAATGCTGTTGATAAATACGAAGCAGACGC  
GCATAAATGCGTGTGTACATGCATACAGATATTCTTCGAATTTGCGCTGGTGCCGCAAACACGTGTTTCTT  
AATGGATCTTCATGAAGTGTTCTATAGTATTCCTTAATGTACCATAGAATATCTGTGTATTCTCTGAAAGT  
AAATTGCATTAAAATTGTAGCTTTAATTGGTGAGCAATGGAAGTTGGGCTATTAACCTGATTTATAGCTAT  
CAGGTAGTAGCGGGAAGGTGCGCATGGGTATATGAATGATAGTTGATATAAATATACTATTATATTGTAG  
ACATGTCAATTTTGGTGGATCTAGCTNTTACTGTTTACCAA

>160\_rnd-1\_family-176\_\_DNA\_\_P  
TACCANCCACTAACCAAACAACATATAGACTGGACAATCAGTGNACGGCGATGGGGCCNCTCGTTTTCTG  
TGCGGCTGGTCCAAAGTCGCCTTCGTTTTTGTTCGGGTTTCGAGACACGCTCGCGCGCTCAGACAGCAAGAG  
AGTAAGAAATACATATGACTTTGTGCGATAGAACGGCATCGCTGCTTTTTTTTATTCCTTCGCACTACAGG  
AAACTGCTTTGGCTTACTCTCAGTGCTCTTTCAATTTGTGTATTTACCGTTGTACTGTCTGTGTGTGATTTG  
TCCGCACAAGCAAAAATGCCACAAATTCAATTTTTCTCAAAAGTCGGTGGCTTTCTTCCCTTTTGAAGGG  
ACGAGTAATATGAAATAATGAAAGCGTTTGCCACGTCGTTGCGAAATTCTTGCANTTTAGCTCGTTATCGT  
TGGTAAGGGTACCTAAGCGTGACCATGTGTGTATTTAAAAATATTTTCGACTCGCTACTCACGCATACTTGC  
ATATTTTGAATAGAACAAATTTATGCGCTTGTGTGCCTGTTGGAGGCCTGCCTGGCCGTTCCCTTGCAAATTT  
GACAAGATTTGAAATTGCTCTAGTTCCACTGTAAATTTGATGTGCTTGTGAAAAGAATTTAACTCTACTAG  
AATGTTTTTACTTTCAGTTTTGTCCGTTACAGTTACAAAGTGGATGTCTACTTATTTTGCCAGAAGTTTTAG  
CTTTGTAGTCAATTTATCAGTAACATGCAGAGGCCGGTGATCCCATTTGCCATTCCCATTTACAGAATGTAT  
TTTCTGTGTTTCATATTTTAAATACCTGTTCCCTTTCAATTTGTGTACAGTACAAGTTCTATTGGTATGCTGG  
GAAACAGGGACGACTTCAAAAGATACCAATATATCGTCTTCCCTATTGACTCTGTCTTTGAACTCTAACGA  
ATTCTTAATGTTATATTAGTTGTCAAGTTTCCTAATAATTTTGAATATATGTGTATAGTTCATTTGATGGG  
GAACCGATAGAGGAGCATTGTGGTCTCAGAGATATTCCTTTCTTGTGAATTTTTTGGTCGTCTATATCTTCTT  
GGAGGTCCCGATGTAGAAGTAATCATCTTATTTCTTTTATTCCTTGAAATAGGTCCTATCTTAAATAATTTT  
GTCAGAAGACTGTTTCGACATAGTCATTTGTCACTTTATTTTTGTTTTATTTTTGTATATGTTTTTTGTATTGA  
ATCAAATATGGCATTTCATTCTAATTACAACACAGTTAACTTAGGTGGTATTTGCGCAAGCCTGGTTGGGTC  
ATCAGACTTTATCGTGGGCAAACGTCAACGGCGTCTTCTTTGAGTACGGTCGCATCGTCACGTAGGTAGTC  
GGGGCCGTCTCCTGTATTGTAGTTGGAGGAGGTCCTTAAAGAATCTTCTCTTGAGCCTCCTGACCACATAC  
CTCCAGCGAGATCTCTTGCTTCCCGGTTACAGTGTCACTGCAGTGTCTGGATCCTTTGAAGTGTCTGAAT



CCGTCTTCGATTTGTACGCGAGGCAATTCCCCACATCTGGATACCGTATCTCCATGTTGGCGCCACCACGA  
CATTGTAAACTGCCCCGTTTGCAGCGAAGTGGCAATGGGCTTCTGGAGCTCAGTAGCCAGTTGGCCTCAGC  
CATTTTATGGCGGCACTGCTTCAGTAGGCCGTCGATGGTCGACCGAAGTTAAGCCTTTCATCATGTACGAT  
TCCAAGATACTTTGCGCTTATGCCAAGGTTAAGGGGGCTGCCATCTATCCAGACTGCTGAAGCCTTGCCAC  
GCACTTTGAGGCATTGAACTTGATGTCCCATTTGCGAGCCCAGCTCTCAAGCAAGTGGATGTATTCCCTTG  
CCCCATCGGTGACTTCGTACTT  
>Ref\_dvir\_390  
TTTAAAATTTGTTCTTGTGTATTTTTGTTTGTGCGCTCGCGCTATTAGCTGTGCGGGTTAGCTTCTTGTGT  
GTATGTTTAACTGCACATTGCCCTCTGGTGAGCAAGTTTTTCGTTAGCAAGCAAGCAATCTATGAATAGAC  
TACTCTCGCGCTCTCTACCGTTTTTCAACTTCCGCTTTGAAATTGTTCTACTTTCTGCCGCTTAGTGCTCCAT  
ACGCTATTAATCTAACTCTCTTTTTTTATTTGGCTGCGTTATTACAGTAGAGACCCACAATAATGCACCATA  
AAATTGTATGTTAAAAGAAAACCTTGCCAAATGCAAATTACGGCAAGTCAATCCAGCATACCTTGTGGCT  
GTATGATAATGTCGTGCATTCTAAATGTACGGGTTACACTGGCCTAGTGGGGGATGCTTTTGCCAAACGAA  
ATGGTTTGCACATAGTTGCGACTCGTGTAGGGAGATTAATGGTAAAATGCGGGCGGATTATACGTCAGAC  
CAGAAGTGGCTTTAGGGGTCTGATTGTTGGTTTTTCGTAAACTAAACGATCAGCTCACAGCCTTGATACCC  
AATTTAATAGCCCAAAACTGTTGGATGAGTCTCCTGGGCCTAAAAAGCCCATTCCTTGTGATTTGACATTG  
CCTAATACCCCTCAGCCTCCAAATGCAAATCAGCAGCCTACATCTCGTTTATTACTCCGGTAGCTGGGAGG  
TCTGCTGTGGACACTGATTCTGACCTAAGCTGTGTGAAATCGGCACGAGAAAACCAGTCAATTTATCCGTG  
TCGTCCGCTGTCATAGAAGTTACGAAAGGGCGATGGCAACAATTAAATTTACAACAGCCCCTAGAAGGCT  
CGTCGTCCGACTACCGGCTGCTTTAGGTACCACAGCTAATAGTGTTCCCACTGCCCTACCTGTGGCGCCT  
ACGCCTGTAGTGGGTTTTGTTTCTAGGCTTTCCCTTACTTCTCATGAGATGGTGTAAAAGCCTTTATACAG  
GTAAAATGCAAGCCCCAGGTATAAAGGTGGGGAATTTTAAACGCGCCTATGGACCTGGCTGAAGCAGG  
ACATCTCAGACTCTTCAATTTTTACCTTCAAATACACAACCTTACAGATGTGATCGAGCTTCCCGTATCGGT  
GGAGGAGTACTCAAGCTGTGATTTTGTCTTTTCGTGGGAACGCACTGATCTTTCCATCTCAGAGATTGAG  
TGGTGGCTGTAAGAGTTGTATTTGGAAGTTTTTATTTCAATTGTCCCTTTCTGATAGAGACCTTTTAGTAGTT  
CTTGGGGACTTTTCATCTTCCATATGTGGAGTGGTCATCGCCATCAGACTCAAACCTTTCTGTTGCCGTCTTCG  
TCTAACAAATTTATTGATGGTTTACATGAAATGTCCTTACGGCAGGTTAATCGTGTGCATAATTCAAGAAA  
CAGATCTCTTGATCTTATTTTCGTGTTGAATTCGTTCAACAGTGTTGTGCACTTCTGAAGACCCTTTTCAT  
CCAACCTCTGGAAATGGCATTGATTTACCAGGCCGAGTCCCTATCAAGGATCCGGAATTAGTTGAACGTTTG  
CGTTGTTTCCAAAAGGCTTATTTTCATAAGCCAAATGAACTTATTCTACAAGTTGTACTTAAACTTTTTTAT  
CTCTATTTTTTGATGTCGTACCTCTTGATCACATAGCGAGGCCTGAAGGCCTTCGTGGTTTTTCAAAGGAACT  
TATAAGGTAAAAAGGAACGTCGAAGTGTTATAAAAAAGTTTAAGAAATCGGGAAATCACTCTGATTCATCA  
CGTTATGCAGTTGCCCGATAAAATTTTTCCACTCAAATTCATCTGTTTTAAGGATTACCTTCGGCGTTGT  
CGGCTTCAATTTTCACACAATCCT  
>160\_rnd-1\_family-287\_\_LTR\_\_Gypsy  
AGTGAGCGGAGAACCTAAAATGGAATCAGGTGAGTGCCAAAACCCGGGGGTAGGCGTGCGTTGGATCCA  
CCAGCGGCGCAAGGAGGAGTTGGTGGCCATCGCCCAGGAGTTCCGGGCTAGANAAGGAAGGGCGCGTGGA  
GGAGCTGCGTAGGCGGCTATCCACCTNCGTGCAGGAGGGCGGCCATTTCGTCTGAGATCTGGGCTCGGCTT  
GCCGAGCTGGAGTCTCAGTTCGCGAAAACGTTAGAGCCGCTATCCTGGGGCGTCCCATCTGACGTGGCTG  
GACGGCCGCGCCAAAAGTCAGAGCCTGATCNTAGGAGCTCGCAATTGTACGGGCGTCCGCGGCCGCTAT  
CCCTGGTGTGGCCGTCACGGGTGTGGAAGAGGCTCCCGATCCCGGGGAAAACGGAGACCGCCGNGCAAC  
CACGACCAACGTAGGCGTGTGGGCCCCAACCCACCATATTCTCGGTCGGAGGTTAGGCCTTTCNCAAACG  
CTCCGGAACAAGTTCGGAGGTGGGGCATGAGATACGATGGCCGCTCCGACCCCTCGGGTTCTTGAGAC  
CTAGAGGAACGCGCCATCACTATGGTATCGCCCTCGATAGATTGCCCCGGGCGATGAGCGAGGTGTTCTG  
CGACAGGGCCGCTCGGTGGGCTTAGAGATGTGCCATGGTCGGTGTTTCAGGAGGGGTTTCTTGANTTGTCT  
TCCTGCCCCACGCTACTTCGAAAGGCTTGAGGACGAAATCCGGTCCCGCAGGCAACGCGTGGGGGAGGAG  
TTCAAGGAGTACCTGNTAGAGCTGAGAGCTCTGATGCATCACGCCAGATACGAACCGGCACAGGAGTTGC  
ACCGGATCTACGAAAACGCCGCTCCCGAATACCAAACCTCTATGTGCGACGGCAAGATTCCACCCANTCA  
ANCTGACGCAACTGNCACCTGTAGTACGAGACGGTCATGAGACAGAGGGCGGAGTACTCGGGAAGCAGGC  
CNGGGGGTCAAGTGGTCNCGAGCTCGAATAGCGCGGAGTGGGCGAGGACGGCACAGCCCCCGGGGGGAC  
ACCTCAACCCGTTCCGGTCTGCTCCCATCGGATCCGGAACGACCGTTGTGGACAGNAGAGTCTCCGCCCC  
GCCGGCAGCGGCTCCCGCGGAGGTGGCCCATCGGATGATGAGCCAAGAGGCCGGGANCGGGTATGATCC  
GCGACGAGCGTGTGCGAGGTGCGCACAGGAGGGGCACTTCGCCAGGGAATGTCCCAACGCNCCCGTTTTG  
TTTTGTTGGGTATGTGGGCGCCGGGGCAGAAGTAGCCAGGATTGTTGTGCGCCGCACGGAGGCGGGAAACG

GGCAACGGCGTCGCCAGGTCAGGGTCGGGTCGGCGCCGACACACACGGGACTCGGTAGTAGTACACCC  
GCTTAAGGTGGAGGGTGGCCGGATCGTCGCCACGGTGGAGATCGGCGGGCGGGCGATGCCTGCCACTATC  
GACACAGGGGCCACTCGCAGCTTCATGAGTGAAGACTGCGTACGCAAGTGGGCGATTTCGGGGGAGAGTG  
GAGAACGTACAGGCGCGCATTCGTCTGGCAGATGGGTCCACCNTNGAGGTAGGGAAGGCCTTGAGGATA  
GACGTCGGCCTAGCGGGGAAGACGGTCAGCATGTTGATGCTTATCATGCCCGCAATGCTGGACCACGTCA  
TCCTGGGGATGGACTTCTTGGGTGCGATGGGCACTACGATACGCTGCGGCGAGGCGGAGCTGGTCCTAGA  
GGCGGTGACGTCTCCGGCCGCGGGGCCAGGAACCAGGGAAGAGCCGGAGGAAGGCCTCCCGGGTCANGA  
AGNGGGAGCGCCTGCTCGGCAACAGAGGCGGAAGAGACGAAGAAGGAACCGAAGGAA

>160\_rnd-5\_family-5434\_\_LINE\_\_I-Jockey

CTCTTGTTAATTACCTCTAATAGTAAGGGAAGTATACAGTTTTTCATGACTCACTCTGTCAAATGAGCCTAT  
CAATTCGTCACATTAGCTTCGAGGAACTTGCAACAGAGATTTAACACACAAACAATAAAAAAGCAGCAGG  
ATATAAAAAAATCGATGGCTTAACCATACAAATCTTCTCCAAAATGCATTTCGTTTCCTAACTTATATATT  
CAACACAATACTCAGACTAGATCACTTCCCGAGACAATGGATAAGCGTAGAGATAATCAATATTCTAAAG  
ACAAACAAACTTGAAAATAAGCTCTCGTCGTA CTGCTTATTAGCCTAATGACAACATTTTCTAAAGTATT  
TGAAACAATACTTTTAAAGAGAATGTTGCCAACTTTGGACGAACCTGCCATCATTCTGAACATCACTTTG  
GAAGAAGAGGCCACGGAACCTCCTGAGCAGTGCCACAGAGTAATAAATAAAATCATAGCTTTTGAAAACA  
AAACAATCCATTACTGCTGCAAAAATGTGAATCGTTGCCACTGTTTCTCATAAATGCCTGGTTCCTCCATT  
AAAAAATGAAAGTAAGCTCCCCAAAATCTGTTCAAATAACAAGTATCTTGGCTTCCATCTAGGATCGGAG  
ACTTACATAGAAAAATCATTATAAATAAAGACAACGAGTGTTCTGGATAAGAGACCAAAAGTCTTAAAC  
TAGCTTAGCAAAACAATGTTTCGCTCTATAAATCCATACTAAAGCCTGTGTGGATATATGATTTACAACTGT  
GGGGTTCTGCTAGCAACTCTAATATTGAAATTATATTATATTATAAATAATTTTTAGCGCTCAAGAAATTA  
TTCAGCAGTCAAAAAAATAATGCGATCCATAGTAAATGCTCCTTTTTAACGTTCTAATGCAAACATACG  
CAAAGACCTAAAAATTGGTTATGTAAAAGAAGAATTAAAGAAAAATAGTACAAAATACATTGATAAACT  
TCACAACCACCAAAATAACATAGCCGTAAATCTACTAGATAAGGATAGAAGACTTAAAAGAGTGCATATT  
TCTCCCGGATAAATAAATTAATAAAGTACGACTTCAGCCTAACATACGAAATAAGTCAAATATAATAGTA  
GATTTCACTGGAACTTGCTATTCCTGTTGAATTTAATTATAGTTAACAATATTAACCTATTGTCTTAAAGC  
AGAATGTAAATAAATAAAATGTAAAAATGAAAATCTTACAAATAAATAGGAGTGGTATGCATAACCGTA  
GTAAGATCGGTATTCTACATACCAGACGTAAAATTGGCGAATTCTAGCAAGCAGTTTGCCCAAGAAACAC  
CAATCATGTCAATCTGTATTGAGAAAACACTACATGCAAGTGCAATATGTCCGAATCATCAGATAAGCAA  
AACTATCTGGATTAAACAGATGATCAGTTGTGACATTATTTAAAAGTATGAAAGCTCCCGCAAGCATGAC  
AGCAGACTTCATTATCATTGAGTTTTTTTGACAGCCAAATGTAGTCTTAGGTTCCCTAACAGGAAAGAGGAG  
TCAAATGTTGAAGATTATATAAACGTAGTTATAAGTCAGCCAGATACTAATTAATACAATTTTTCAATAAA  
TGTACTTGTACGAAGCCAGCACAAATTATACATTCCCGCTGCGACATGCCGCCTAAGAAAGATAGCTTAA  
TGCTGCATTGCGGCTGCTACCCGTCTATTACATTGCCACCACGCCAGTATTGTGATCTGCCATTAACAATA  
GTTAACAATATGGCTATCACAGTTTTTCATTATAAATAAAATAAAACTTTATGATTTATATTGTCTGCATTTGA  
GTTGTATCGACAGTCTATTAACTTCAGAAAA

>Ref\_dvir\_741

AAAAATTCAACTGCACCAAATTCATCATATCTACAAGCCCTTAAATGAGAACCCATCCCATCCGAATGCTC  
AATCGATCAATCCTAATCCATGGTCACAATCGGTTGGTTCAATATTAAATCCAGACAAATGGAAGAAATA  
CGTCTTTTTTGAAAGACGCATCCTACGCCGTGCCTTAGGGAAATGCTCCCTCATACCCCACTCACACAATTA  
CATATCAAACCTCAAAGCTATACAAAATCTCAAAGACCAAGCGAGTAGACACCCTCATATTTAAGATAATT  
GAAAAGTTCCTAGAACGAAACCGCAACAGTACAAACCAACAAATATTAGATAGCATAGAGCAGATCCGG  
ATACCGGTCGGATTCTCAACAAACCACCTAACCATAAACCATATAAACAGTCTCAAAGAGAAGGGCATAA  
TACGCAACTCTCAGAACAACTAATATTCTACCATAGAAAAAGGCAGTCTATCGACCCTAACGATGGACT  
TGCTTACAACATTAGACAATAAAAAACGAAATGCTCATCTTATTATTTGTGCGAACATATCTCCCCCTTT  
CTCCCTATCTTCTATTGTATAAATATTTCTACCTCCTATCTCTTCTCAATCCAGTTAACTAGTTCCTAAGC  
CCTTGTTATTACTAATTAAGCTAGTTATAAGACAAAAACCAACAAAACCAAATTAACACAATGAAATCC  
AGGTTTTTACTCAATACGAGTCTTTCCTAGGAATATATATACACAATAAAATTACACAACCTACACCAA  
ACATAAACCTTAAGAACTATAAAATAAATAAAATTAAGTAATAGAATTAACGCCTGGATAAGCTAGAAGC  
GCAAGGCAACATGAAAATGTAAAACCTAAAATTAAGTTAACTTGACTTTGTCAATCAAGACTGTACTAAT  
AAATAAGGTACCAAAATGTATTACCATGTAACTACTGTGACCAATAAAAAAAGAAGAAAGAAGAGTT  
TTCACACCAAAATAGTGTTTTTCAGTTCACAAAAGTAAAGTAAAGCGCACGAAATGTCTGATTCTGCAGTT  
GCAACGTCCGCATCTCCTGTACAGCAGTCCGCCACGCACCACCAACTCAGCAAATGGTAGATGCATCGAT  
TAAAAATTTGAAGGAACGTGGTGGCTCATCCCTTCTGGCAATTAAAAAATATATCGGTGCTACATACAAG

TGCGATGCCCAGAAGCTAGCCCCGTTTCATTA AAAAGTACCTTAAGAATGCAGTTGCGAATGGAAAGCTGA  
TCCAAACAAAGGGCAAGGGTGCCTCCGGTTCGTTTAACTATCTGCATCCGCTAACAAAGGATGCCAAGCC  
AAAGGCCTCCGCTGTCGAGAAGAAAACCAAGAAGGTAAATGCTTCGGCGGCAGCAGCAACTAAAAGGAA  
GAGTAGTACGTCTACCACGAAGAAAGCAGCGGGTGCCGCTGATAAAAAGCTATCAAAATCCGCAGCAGC  
CAAAAAAATGTTGAGAAAAAGAAGGCTGACAAAGAAAAGGCTAAGGATGCGAAGAAAACGGGAACCA  
TAAAGGCCAAGCCTACAACAGCAAAGGCTAAGTCAAGCGCAACAAAGCCAAAGACCCCTAAACCTAAGA  
CCACAAGTGCTAAACCGAAAAAAGTCGTGTGGCTACGACCCCCAAGAAAAGTGTGTCAAGAAGCCAA  
AAGCGAAGACTGCATCTGCAACGAAGAAATAATTTGAAATTGCTAACTGCTTGTGTCAGCATATGCAAATTT  
CTAATAATGAAATTTGTTTTCTACAAAGCCCTTTTAAGGGCTACAAATTACGATTTTCTAAGAGAAAGAA  
TTTTCTCTTTTGTGTACAACAGCAAATA

>9\_rnd-5\_family-2817\_\_LTR\_\_Gypsy

TGTAGTGTGTATATGCCTTAAAAAGAACACCCTATATACAAATATAAAGTATGCGGCACTTTGTGCGCATAC  
AATAACAATTATACATTAAACAAGCCCAGAGCCACTTTATATATTGGCTCTGGCTCATATTACGCAGCGCA  
GTTCACTAGCCTCTCTAGCTGACCGTTTATGCTTACGCTGCATTTCCCACGCTCCGTCTGAGCGCATACCAT  
GAGCAACATATATGCTCACTAACACAGGCATATGCAAGCTACTCACTCTCCCTCTCTTTGTAGCTGTTAAC  
CAATAACAGCATAAGTATATACATGTATCCATAGGTTAAGCGCAATATTTTACTTTGAATAAAAATCATTCT  
AAAAACTAAAGTCAAACGGCACAGACGTGCCAGTGTATTAAATTAAATTGNATATCAGTAACGACATTAC  
ATGGCGACCGTGACAATTGGTCTCACCAACCTGCAGTGAATAAAAAACATCCCCAAAACTAGTGGAAG  
GCAGCCAAGAAGGCTGGCAACAAACAACAACAACTTCAACAAAAACAACAGCAACAGCAGATGCCATT  
TACTACAATTCTGGCAACAAATACAAAGACAGCAGCGATGGAGGGATAGCTGTGGACAATAAATAAATA  
TCTGAGTGAGTAGAGTGCGGATGGATAAGAAACCAAAGAAACAGAAAAAGCGCGGCGGTGTCAAACAAA  
GACTGAGGTCGGAAATTGACCGTCTCAGCAAAGACTTGAACGATCAAGATAACCCGCCAGCATGGAACG  
ATTCTGTTTCCATGCATGAAAAGCGCTCGTTTCGTGAAGCACAAGTGTGCAATTAATAAACAAAAACA  
AAATCCATCCGTCTCCTACCGCCAGATACAAACTATAAACAAGAAAGTAACTCCTCCTATTCAAACAGCT  
ATCCCAGCATATAAGAGACAATGTCCGGCGGACTGTGAGGGTCCATTCTACAACATTGGCTGCGCACTGA  
CTTGCGAGATTGCCAAACCGACAGCGCTACAAAGAGCGCAATAGAGGGCAACATACAATCATCCCGGCCT  
GTGCGAGGACCAGCACCGGCAACATGAACGAGTTTCGACAGTGGACCGACAGCGCTACAAAGAGCGCAC  
TACGAATTTTTTGTTTTATATATATAATGATTTTANAAAATTGAGCGAGAAGTCTGCCCCGATCAGAGTACAT  
GTTGGAAGGCTGTACAAAATATAGGCAGGAAAAATTGTAAATTCACCTGCGAGTGAATAATAAAAAGAA  
AAGACATATAGCCAAAGGGCAATATAAGAGACAAATAAAATAAAATTAAAGTTAAAACGAGAAAGAAGG  
GCTATCTTCGGCACGCCAAAGATCTAATACCCTTGCAGACCCAGCTTTTTTCATAATGCTCATAGTGGCTTG  
CNCCATATCTAAGAAGTACCGGGAAAAATANTAAATGCCGAGTTTGGTCAAGATATCTTGATAATCAAAT  
GTATTTTCATACGACTTAATTTTCGACCGATCGTTTCTATGGCAGCTATATGATAGAGTGGTCCGATCTTA  
ATAGGATTTTGCATATATATGAGGAGTAAAGTAAACTAATAAGGTGCCGAGTTTGGTCAAGATATCTTG  
GAAAAACAAAATGTTTTTTTCATACAAAACTTAATTTTTTCGACCGATCGTTTCTATGGCAGCTATATGATA  
TAGTGGTCCGATCTTAATAGGATTTTGCATATATATGAAGAGTAAAGTAAAACTAATAAATGCCGAGTT  
TGGTCAAGATATCTTGAAAAACAAAANTGTTTTTCATNCAAAAACTTAATTTTCGACCGATCATTCCTATG  
GCAGCTATATGAT

>160\_rnd-1\_family-70\_\_DNA\_\_P

TTTAAATGCACACATGGCAACGCTTGGGGCACCCCTTACCAACGATAGCGAGCTAAAATGCAAGAATTTTCGC  
ATCGACGTGGCAAACCCTTTCTCTATTTTCATATTGCTCGTACCTTTAAAAGGGTAGAAATGCCTCAGCATT  
TGAGAAAAATTGAATTTGTGCGCAGTTTTGCTTGTGCGACACATACACACACACACACATTTAAACGA  
TCCCTAAACATAAAGAGAGCATTGAGAGCTGAGAGTAAGTGCGAGCGAGATAAATGTTAACAGCGTTGC  
CGTTCTATCGCCCAAATCATATGGAAGAGAGTGCGCCAAGCACTTTCCTGTAGAGTAAGCGGTTCAAAAA  
TACATCATATGTATATCTTACTCCCTTACTCGCAAGTTTGGACCAGATGCCTCCGATACATGTTGTGCCTTC  
TTTCCGGTACTCATTTCTAGTCTATATGTTGTTTGGTTAGTGCTGGCAAAGACAATATAAACACTAAGATG  
AGTAACGCCCATACATTTGAATGGGACGCAAAATTTCTAGCCGGGCCTTTTCATCTGGCCTTTGAGGCTTCG  
TACGGCATGCCTGCCGACTGGTTGTTTCGTTTTCCAAAGACCAGACGAACGAATGCCGAAGTCGCGGCTTG  
CTGATGCTGACACGAGCTACGAAGTTAGTCGCCAGCCTGCCTTCAGGAAAGCTGGTTCGATGCTGCTTTGC  
GTCGGTTTCGTTTTTCGAAGTACATTGAGCGAAAAAGTTTAGAACTTACGATCGACGCAAAGTGCTCGTGCTT  
TATCCATAATATGCATGCTTTATATAAATGATATATTACCTTAAATATTAACAAATAATTTTACAGGAAAA  
TTTAAGAACTTATATAATTTTTACACAAGGCGCTTCTTGCGCAATAACTATGTTAAGAAAAATAGCACACAT  
AGATTGATTTCACTTTTCTTTTTGGACAGTGTATGCTCGAGAAAAGTTCTTGTCTCAGCCAATAGCGTGCGT  
GCACCTTTCGTTGTATGCGTGAATTATACATGCATAAGAAGTATAATGTATGTATGCATGTGTTGTTATTC

ACTGCTCTGGCTTTAGCTGGCAAGAAATTAATTTTGTAGTTTTCTAACGCAGATCATGACCTATCCCAA  
TTTGTGTTGACATATGAATGCATTTTGTGTACTGAGGTTGGCTCCGCAGAAAATGTGTATTTCTAAGTCGA  
TGCAAATATTTACATAATTTCTTTAAATTAATTAATATTTTATTCTCCAATTAANAAAATAAAAAAN  
AAATTAATAATTAATAATGTATCTTTGAAAACAACAAATTTGCACTTTTATTTTCTTAATTTATTTTGTAT  
TACTTAAAAATAATAAATTTAATTAATAATTTCAAATATAAAAAATTACATAAATATTTGCATCGACTT  
AAAAATACAAATTTTTTTGTACGGAGCCAACCTCAGTACACAAAATGCATTCATATATCAACAGAAATTTT  
GGGTAGGTCGTGATCTGCGCTAAAAAACTAAGAAAATTGTTTCTTTGCCAGCCAGAGACTTTGCCAGAGC  
AGTGGATAACAACACATTCAAATATGCTGTTATGTATGTATATTCACACGCATACAAACATAATTGCTTGC  
ACGGCCCTCATAGAGCCGAAGCTGAGAGCAAATTCATTTTTAGCTTTTTCTGTTCTCTCGGCTGTGAGAGC  
GCAATGCTACAGATTTTCGTTTTCTGTTCTCAATTTTCAAAAAATCAAGCTGCATAGTAGCATTTTGTTGTATG  
GCGTTACTCATCTTAGTGTTTATATTGTCTTTGGTGCNNGGGGTGTAGCGAGCAAATGCAA

>9\_rnd-1\_family-87\_\_Unknown

ATGATTTTGCCTATATATGAGGCGAGTATAGTAAACTAATAAATGCCGAGTTTNGTCAAGATATCTTGAG  
AANCAAAATGTTTTTTTATAAACAACCTAATTTTCGACCGATCGTTCCTATGGCAGCTATATGATATAGTG  
GTCCGATCTTAATAGNATTTAGCATATATATGAGGAGCATAGNAAAATAAATGCCGAGTTTGGTCA  
AGATATCTTGAAAAACNAAACGTTTTTTCATAAAACAACCTAATNTTCGACCGATCGTTCCTATGGCAGCT  
ATATGATATAGTGGTCCGATNTTAATAGGATTTTGCATATATATGAGGAGNATAGTAAAACCAAAGACAA  
TATAAACACTAAGATGAGTAACGCCATACAACAAAATGCTACTATGCAGCTTGATTTTTTGAATTTGAG  
AACGAAAACGAAATCTGTAGCATTGCGCTCTCACAGCCGAGAGAACGAAAAGCTAAAAATAGAATTTG  
CTCTCAGCTTCGGCTCTATGAGGGCCGTGCAAGCAATTATGTTTGTATGCGTGTGAATATACATACATAAC  
AGCATATTTGAATGTGTGTTATCCACTGCTCTGGCAAAGTCTCTGGCTGGCAAAGAAACAATTTTCTTAG  
TTTTTTAGCGCAGATCACGACCTACCCAAAATTTCTGTTGATATATGAATGCATTTTGTGTACTGAGGTTG  
GCTCCGTAAAAAAATTTGTATTTTTTAAGTCGATGCAAATATTTATGTAATTTTTTATATTTGAAATTATTA  
TTAAATTATTATTATTTTTTAAGTAATACAAAATAAATTAAGGAAATAAAAGTGCAAATTTGTTGTTTTCAA  
AGATACATTTAATTAATTTTTTTTTTTTTTTTATTTTATTNTTTTTGTTTGAATTATAAAGAACAAGTACGCA  
GGGAACACCGCGAGGAGGCCATTATAATTATAATGGGGTCATAACTAAATATGACCTTCGAGTCGACTTG  
AAATATGTAATTGTATTTTTTAGCACTCTTTTTATTTCTTAATTGGAGAATAAAAATAATATTAATTTAATT  
TAAAGAAATTATGTAAATATTTGCATCGACTTAGAAATACATATTTTTCTGCGGAGCCAACCTCAGTACAC  
AAAATGCATTCATATATCAACACAAATTTGGGATAGGTCATGATCTGCGCTAGAAAATAACAAAATTAA  
TTTCTTGCCAGCTAAAGCCAGAGCAGTGAATAACAACACATACATACATACTTTAAAGTTCTTATGCATGT  
ATAATTCACGCATACAACGAAAGGTGCACGCACGCTATTGGCTGAGACAAGAACTTTTCTCGAGCATACA  
CTGTCCAAAAAGAAAAGTGAAATCAATCTATGTGTGCTATTTTCTTAACATAGTTATTGCGCAAGAAGCGC  
CTTGTGTAAAAATTATATAAGTTCTTAAATTTTCCTGTAAAATTAATCGTTAATATCTAGGGTAATATATCA  
TTTAAATAAAGCATGCATTTTCATGGATAAAGCACAAAGCACTTTGCGTCGATCGTAAGTTCTAACTTTTTC  
GCTCAATGTACTTCGAAAACGAAGCGACGCAAAGCAGCATCGACCAGCTTTGCTGAAGGCAGGCTGGCG  
ACTAACTTCGTAGCTCGTGTGTCAGCATCAGCAAGCCGCGACTTCGGCATTTCGTTCTGTTCTTTGGAGAA  
CGAACAACCGAGTCGGCAGGCATGCCGTACGAAGCCTCAAAGGCCAGATGAAAGGCCAGGCTAGAAATTT  
TGCGTCGCATTCAAATGTATGGGCGTTACTCATCTTAGTGTTTATATTGTCTTTGGT

>9\_rnd-1\_family-488\_\_LTR\_\_Gypsy

TGTAGGCAGTTCGATCATGCCTTTAGATACTGCCTATCTAAGCGGAAGATATTCTGCTACAGATGCGGAAA  
GCCGAACACATTCTGCTCGAAATGCGAACTATCCGGGAAACCCAGAGGGAGCGCGATAGTAGCGGGA  
CAGGCGCGTTCAGGGACGGAGAACGCGGAGAAGCAGGAGAGGAGCCCCTACTAAAGCCAATAGTCGTTG  
GAAAGGAGTCGGATATTTGAGATAAGGACCAGGATAAGGGTATTTATAAGATATAAACGAAGGAGGTAC  
ATTAAGGGGCTTACCATACGAAGAACGTGTCCGGGAATACATGTCCGGTCCGAAATAGATTTTTTGGTATG  
CGACAGTTTGATGGGATGACGCTGGCCACCAAAGAGTGGTGAAAGCTCGGGCGCGCTTCCGTAGACGCA  
GGATGACGAGGCGCCAGGTCATCGAACTGTAGCCGGGAGGATCCAAAANGAAAGGGTTACTAGACACC  
GGAGCCTCGGCCAGCCTGCTGGGAAAAGGTGGTCGAGAATTAGTTATTTAGTTAAGNATTAGGAGTTACG  
GTGCAACCGTACGTTTTCGGTAGTCACGACCGCTGGAGGGGAGGATAAATCAATCATAGGTAGGGTAGAGC  
TCCTAATCTCGTACAGGGAGCAGCATAAAAAACATAACGTTTTTATCTGCCCTACCTGAAACAGCGAGCCT  
ATTTTGGAATTGATTTCTGGCGAGCTTTTAACCTAGCCCCTGATATTTTGGGCCCCGAGAAGGTAACCTCCA  
CGGAACACCAAGGGGAAGAGCTTTGGCAGTGTGATGACACACTATGCGGAAGAGGACGAAGAANGCG  
AAAACGAGCCAGATTCATGGGAGTTGTCTCGGGAGGAAAGGGTAGAGTTGGAGGCGGTAAAGCAGGGGT  
TTTGTCTTTGAGCATAGCGGATTAGGAACGACAGACTTAGAGAAGCACACTATCGACTTAGTGGAAGGTG  
CCCAACCGTTCAAAGATAGACCCTACCCATTATCGCCAGCGATGCAGAAAGTAGTGATGACGAAGTAGA

CAAAATGTTGAGTTTGAAGGTTATAGAAGTGCAACAGCCCATGGAGTAACCGCACAAACCGTAGTGCGAAG  
ACCGGGGAAACCCCGTTTTTGCCTCGATGCACGCAAAGCTCAACAATTTGACGGTGAAAGACGCGTATCC  
ACTACCCTGTATAGAAGGCATCCTATCTAGAATAGACCAGACCCACTACATCTCCAGTGCGGATCTGAAG  
TTCGCGTATTGGCAGGTCGAACTAGACGACAAAAGCAAGCCCTATACCGCATTACCGTACCAGGTAGGC  
CGCTATACCAGTTTCGCGTCATGCCGTTTGGTATTATGCAATGCAGCCCAACGTCTAGTTCGTCTGATGGAC  
AAGGTAATTCCCAACGAGTTGCGGTCCAACGTCTTTGTGTACTTGGGACTTATTAGTCATTTCCCCTGATTT  
CCCAACGCACTTGAAATATTTGCGACAAGTGGGCAAATGCTTAAGAGAAGCCAAACTCTCTATCGGACTG  
CAAAAATCCAAATTTTGGCTTCGGGGCATTAAAATACCTAGGATTCATTATTGGTGGTGGCAGCTTCGCAT  
GGACCCCGAACGGGTATAGCTNTTAAGCGAATCCCCGTGCCTCGGTGCGGCAAAGAGGTTGCTCTTTTT  
GGGTACCGCAGGTTGGTACCGGCGCTTTATGCGAGATTTGCGGGCAATGGCCGCCCCACTGACTGAAATG  
CTAAAAAAGGATAGCGGAAAGTTTGTATTGAGTGACGAGGCAACACGAGCCGTTNANCAGTTGAAGNCC  
GC

>Ref\_dvir\_635

CCACCACTATCTCTAGTCTTTCTGACGCTTCATCTTTTCGTTTTAGCTACTTACCATAACATTCGTCAAATGT  
AAAACAATTGCGAAAGTGTGGGCCAACGGACCCAGGGCTTTTATTATTGCACGCTGAAACACAGAAGGTG  
CGTTCTTCAGACCAAAGGGCATGGTTAAGAATTCGTACTGTCCATCAGGTGTAACGAAAGCCGTTTCGCTC  
AATTGAATCTGGGTGTACTGGGATTTGGTAAAATCCACTTGCCATATCTATACACGAAAAGTACCTTGCAC  
CACGAAGACGAGCTATTTGATCCGAAATAAGAGGCAAAGGATATTTATCGGCAATTGTATTGTCATTTAA  
AACGCGGTAATCTACACAAAGACGATCTGTGCCATTTTTCTTCTTAACCAGCATCATGGGACTAGCGAATG  
GTGAACAGCTGGGACGAATAATTTTTGATGTAAGCAATTCATCAATTTTGACCGAACGTGCTTCCTCTCA  
TCTTCGCTAAGCCTATAAAGTTCGGCGTTGCACAGTCTTTTGTGGATCTATTAGCCTAATTTCTAATTGGCCT  
GTCGTCACACGAGTCATTGGAATTCCGTCGATAAACCTATCAGAGTGACATCTCAACATATTGTTCAATAT  
CGTCTTATCAGAATCATTTAAATTGGTATCAGAATTTATGATTTCTTCATACTTCACTAGACTCAGAACATT  
TACTCTTTTTGTCTTATAAAAAGCAAAATTTATCTGCATCAATTGATACACCAAAGCCCTGGCTTAAAACCT  
CACGGCCAATCAACACTTCATGCTTCAAATATTTGTCCATACACACATGTAATAAAACTTGTAACAATAT  
TGTTCAATATTAATATTACTCAGAACTTGCAATGTGCTACAAATTGAATCGTTATGCCATTTAAAGTTACA  
ATATTGTGAAATCGTTTTCCGGTGAATTTTTCGACAACACTCTCCTTGACCAGTGAACATTCGGCTCCAGA  
ATCGAAACAATATGGAATAGACTACCGGATAAGGTATTGGTCCACTTGGTGGAGCTACTGTACAAACGT  
CAACTCGCTTCTAACGCTACTGATACAGCAATCTCCTCCAAATCTTTGCCTTCCACTTAGAGAGCAATAG  
GGTGACTATGCGACTGCCGTACTCAGCAAAACTCTCTCCAGTTTTGGGACGTCCGTTCAAATGTTTCATCA  
GTATGGCAGAAGTTGTCTCAATGCCACGAAACGTTGGATGAAGAGTTCCTTATACTGCGGCCATGTGAT  
GCCAGCGAAGCATATTTGGAATAGCCATTGCGATGCACTGCCTTCTAATGCTTTGCTTAACGCAATCACAA  
GCGCACTGCCTTCGAGAGCATTATCCGCGAAGGTTAGGTCCACTGTAGTACACCAAGCTGATGCATCTGCT  
CCAGCGGTGTCAGGGCAAAACTTGGGTAGAGTGACGTGGAGTGCTTTCCCGTCTATTGCCGGTGCTCTTG  
TGCCTGCATGGATTTTATTATTTCCATTAGATTACGATTTTGCTCTTCTAAGGCTGCCCTTAATAAGTTAGA  
GCTGTCTCTTTTGGCGGAGCTTATCCCACTTCTGATGTCGGCGGCAGGGATATGTCTGTGCGCGGCAAAG  
GTATGTCATCCATGTTGATACTTCTGATGATTGACGCGGCTGCACAGCGAGTTCCGATCGGTTCAAATACC  
CAAGCTCAACTGACCATGTCAGCCTACGCACTCATGTTCGTAAACTCACTCATGTTCGTAAACTCACTCATGT  
CGAGTGTATGTAGCCATCTCTGTCTTACTCAAGACTTCTTGGAATCTTA

>9\_rnd-1\_family-389\_\_Unknown

ACGATTTGCGCCTTCTTCCAGGCCGCTGGGAAGTGGCCTAGTCGAAGAGCTGCATTGAAAAATGGAGACA  
AAAGAAAAATCAAATGAAAAAGCAGTCTTCGCCGGGGGCTTTGCGGTTTTTAAGACTCTTGATCTCCTG  
CTTCACTTCGTGTACTGTGATTGGTGTACAGGGAGGGACATTTGGAAGGGGTGCTCCAGGGTTTGC  
ACTCTGTAGCCTGTCTTGTGATGCGGTCTCGAACGGCGTGAATCGCTCCTCCAGATTGCTGACGAAGGCTT  
CTGCTCTGTCTTTTGGCGATCTGGCCCAGGTGCCGTTGGCATGACGCACGGGAAACTTGGGTGCGGCTTGC  
CGTTCATACTGCCTTGTGAGGTTCCAGAGCGCGAAATTCGAGCTCACGTGCACTGTTGCTTCCTCCAGCTT  
GGTGTCTGTGGCTTTTTTTCTGGATAATCAGCTCCTTCCTACCCTGTTGGCAATACGACGATAGATCCTGT  
CAATCGTGGGGTCTTGGGTACGGACATACTCCTTCCTCAATCGCTTTTTAGGGCAAGTAGACCTTCCAAA  
TGAGGGGAAAATGTCCTTGAGCGCTGGCTTGTAGGGGCTGGTTACGTATGTGCGCAGCATTGGCGGGTGC  
GCAACAANAATCACTTGCAAAACAACAACAGTGCGCACGAAACTCAATTTGTTCTTCGTCTCCTCCGTTTTG  
ATCGATAAGAGGTTTGTGAGCCATGATGAGGACNTANGAACTCAGCGCAAAGAAAATGGACAGATAAT  
GCCACTGTGTTTTTTGCGGGTTTCTGTGTCGTTCTTACAAGGCAGCGCGTAGAAACAACAACAGCACAATT  
TGGGTACCAATGTTGTTGTTGCAGAGCCGAGTCTCGGCGCAAGTAGGTAGAAAAATTTGAATGCCAGCAG  
GCCATGGCATTCAAATCAAAGGGTCACGCGCACGGCGCGCTAACATNATANATTATGACGTCACAATTTA

TNGAATTTTATTTCTTGTNTGACGAGTATATATTTTCNACCTTTATTACGTACATTTAAATAATTTATGAAT  
AGGGTCCTTTATAGCAAATAATTGATTGACATATGTTAATCATTTTANATACGAAATGATCGCACACAAAA  
AGCCTTGGGCTGTGACGTACATGCGCAACAGAATATTGCAATCTTCTTAAATTCATAGACTTCCCTTGGC  
TTGGCAGACACATACATATATGCAGATTTGCACCAATATGTGTGAGATGAGACACACATACAACAACCTAT  
TTGGCGGGTCGCGGCATTGATACCCTTATTTATAAGAATGGTATATAATTTATAAAGAAAACAATTATTAT  
TGA CTGTACTAATAGTTGCACACTAAATACGAAATTATATTTTTCATAGACATTGAATAAAAAATGTATATA  
TAAGANGGTTTGTGCTATTTGGTTACATCGCTTATGAATAGTTAAAATACCCTATTTTGAGAAAAGGTGCC  
TTGCTGGTTCGAAAAATGAAAAATGATAAAAAATCTGCCGATCTGCTTGCAAGTTGAAAGCGAGTGGAGAAG  
AAGAAGACATGACTTTGCGAATTATAGGCATAGCAGTGCTTAGAAACCACAACAATGAGTTAGAAGGGT  
GCAGAAGCTAAGATCATAGGCTGTAGCCTCAAACAAAAAGGGATAGCAAGGACAGAATTTGTGGTGTGC  
TTTTTTCATTGTGCGAGTCGTTTGTGTTTATTGATTATGGTTGTTGTTGTTTCTTATGGAAAATGTTTGAAGTTGTC  
ATTGAATTNTGGGCATCGGCAGAAAGTAGCTGCAGACAGCCGGGTGTTGTGTTTGCAA

>160\_rnd-5\_family-3646\_\_LTR\_\_Gypsy

GGTATCCACTTCCACACATACAAGACTGTACACACATTTTTCATGGCAAGAAAATATTCTCAAAAATTGAT  
CTTAACCGTGCGTATCACCAGATCCCCATCGAACCAGGCGACGTCCCAAAGACTGCAATAACCACACCAT  
TTGGATTATTTGAGTTTACACATGACATTTGGATTGTGCAACGCTGCACAAACCTTCCAAAGGTACATGCA  
TTCCGCACTGAGGGATTTAGACTTTGTTTTCTGCTCTATATTGACGATATCGCCGTTATCAACACCAAATCCA  
CCTTCGGCAAGTGTTTGAACGACTTCGACGTTTTCTGCTCTCAAAATCAACAATCGAGTTTCTTGGTCATTTG  
ATCGATCATAGTGGCATCAAACCATTACCAGACAAAGTCAAAACCATCATCGAGTTTCCCTTGCCCAAAG  
TCGCAAAAGAACTGAAACGTTTTTTTGGCAACGATTAACTTTTATCGAAGATTCTTGCCAAAAGCAATCACT  
CATCGAGCACCCTGGTANAATTAATACCGGGTAACAAAAAAAACGACTCAACTCCAATAACTTGGACAG  
GTGACACGCTAAAACATTTTGAGGAATGCAAGCGTTCCTAGCTGCAGCAACACTTTTGGTACATCCTGCT  
CCAGATGCCAGTTATCACTCAGCACGGACGCAAGCGATACAGCCGTTGGCGCTGTACTGCACCAGATCG  
TCAACAACGAACCTTCAGCCAATGGGATTTTTTAGCGTTAACTTACTGACGCACAACGCAAGTACAGTAC  
TTACGATCGAGAGCTTCTTGCAATTTACCTTAGTATCAAGCATTTCGTTACATGCTCGAAGGTAAAATTT  
TTTATGTCCACACTGACCATAAACCATTGGTATACGCTTTTACTCAAAAATCAGAAAAAGCTTCTCCACGT  
CAGCTTCGACAGCTAGATTTTATCGGACAATTCACGACATCTATTCTGCACATAGCAGGTGTCGATAACAT  
TACTGCTGATACACTCTCTCGCATCGAAACTATTGAAGCCAACATCATCGACTACAATAAGATTGCTGCTT  
CACAAGCAAGTTGTCCAGAGCTGAAAAAGCTACTTAATGACAACACAACCTTCACTTCAAATCAAATCTAT  
CAACTTACCGCAATCAAGTACTCCAATCTTATGCGATTTTTCTACTTCCACAGTGCGGCCATTTCATACCGC  
AGCCACATCGAAAAAATATTATCAGCAAGATACATGGCATTGCCCATGGAGGAGTTGGATCAACAATTAA  
AATTTGGACCTCATTGGAGCATCGCTACACAAGATGGCCAGATGCAATCGCCATCGAGGATATCCAAGCT  
GAAACAGTAGCCACAGCACTCATCAACACATGGATTTCTCGCTTTGGAGTTCCAGCACGCATTACCACGG  
ACCAAGGCAGACAATTTGAATCCAGGTTATTTAGCGAGCTATCGCGCCTCCTCGGCATTGACCATTTACGA  
ACAACCGCCTACCATCCACAGGCAAACGGAATCATCGAACGTTGGCACCGCGCGATTGAGGCAGCTATAA  
TGTGTACANCAGGATCGGCTGGCCATCCAAATTGCCAATGATTCTCCTCGGCCTACGCTCAGCATATAAG  
CCCGACATCCGAACGACAGCAGCACAGCTTGTTTACGGCACAACTCTTCGTCTTCTTGAGAAATTTTTCAG  
CAACTCCGGTCAACTTCAACCACANACTGATTTTCGCCAAGGATCTAGCAGAGATGATGCGCGACATCCGA  
CCA ACTCAA ACTTCCA ACCACGACTCATCAAAGCCTTTCATCTTCAAGCAATTAAG

>9\_rnd-5\_family-8689\_\_LTR\_\_Gypsy

AGAAGACCGACAGCGCCACATAGAGCGCATCAAAGAAAATAAAAGCTGAATTAAGACTTCGCAACCGAG  
CGAAGCCATGCGAGGCCGCAAGTATGCGTAAGCCTTAACTTGCCATAGATTTAATTTCTACATGCGATTTG  
ACGCACGTCAGTGCGAGTCGCAAAATACTAAACCTCTTAGACTTTCATTACTAACATATCTGGTTGGACAA  
TTTGTTTTTATATATAAAAATGTAATTTGAATTGTGAGCCAACCACATAAACTAAATAACTTTTTCC  
ACGTCTCTGGCGCTGAGTATTTATACTTAGCTGCGTTTAGAATCTTAGTGTAATTGATAAATCTTGCAATA  
AGTTCATTGCAATGAAAATAACACTCAAGATTTTGGAAAATAAAAATTCATTTTCTTTCATGAACGTTAG  
ATCGATTNTTTTCATTGAATATATAAAGACAATTAAGATTACATAATGGGATGGTTTAGTGATTCTAGTGA  
GGCAAAAGACAATACTGCCAACGTTGTAAACAACGTCAAGATAATTGATCACACGGACGATATAATTGTG  
GATCCTGTTATTAATTATCACGATAGTTAACACTTTCATAATAAAAATTATTAAGAAAAGATACATGAGTAG  
GGCAAATAACTTAGATAAGATCTAAAAATGAATAAGGAGAAAATAGATCACGCTTACGAAAGCTTTCCA  
AATTTAAGCATTAATGCGATTAGAGTTTTACATTCCCATAGCGAGTACGTATCAGTATATCAGTTCGAGAC  
TGATTATATAGAAGCTTTTCGGCGGAATCTGTAGCCCACTTATNCACTGCGATAAAGCAGAAAAGGCAAT  
GGTACTTTCAACACTACNATATGTCAGGGTAAAATTAACAAAAGAAGACTACATGGTTAGTACGCTTACA  
NAAGTAAGAAAAGTCCAGTAAAAAGAATGGAATGGAACGAAATCGCGAAACATATCGACGCATTTCTGTT

ACAAATTCGATAAATCTTACAAATGCATCAATAAAGATGCAGTTATAAAAAGCGGAGACACTAAAAAACCC  
ATAGAAATTATTAGTAAGGGAATATAATAATATAATAGTTACCTTTAGTAAATAGNTACGAANAATAAAT  
TCACATCTGAGCACAANAGTAAATGTTTAAAGGGTAATAAAAATCCCTAAACACAAGATTGATTACTGTCAC  
CAATAGGCGACATATTCAGATAAACGTGCCAGAAAGTCTAAATCAATTGGCGGAGTTTGATCCCGACCAA  
TTAAAAGAATNAAACGAATCAATTCACCAAGCGACGCTGAATCTGATAGTGACATTGAAACACTGGAA  
GAAAGCGATCCAATCGAAACCAAACAGTAATAANAATCTTTGAAATGGCACAACAGTTGTAGAATTTAT  
CAAGATAGCCACATCTCTGATACCAGAGTTTGACGGTAAGNCGGAAAATCTACAAAGTTTTCTAGATTCTT  
TGAATCTATTAGAAACCTTAAAGGGCACATATGAGCTAACAGCCTCGTAAAAACANAGCTAAAAGGCCA  
NGCGAGAAATTTAATAGGCAATGAGCAGACAATTGCTGCAATCATCACGCAACTANCAAATGCAGTAAA  
AGGAGAATCGGNAGAAGTTGTATCTGCTAAGCTTCTAAATCTGCAACAGAAAAATAAAACGGCTAACCA  
ATACGCCCAAGAGGTGGAAAAACTGGCAAAGGCCCTTGAAGGCGCCTATATCAGTGAAGGTCTAAGCCA  
ATCACTTGCAAACAAATACAGCACTACAACAGCTGTAAAAGCTATGACCCAAAATTGTTCAATTG

>9\_rnd-5\_family-2674\_\_DNA\_\_Maverick

GGCATCAACATCAGCAAACAATAATCCAAAATGCACAACGCTTTTGTGAGGTTTGTGGAGTAACGGTGGC  
TCATAATCGCTGGGCACAACATTTGCGGACAAATGAGCACAATAAAGGCCTTCACACCGTTGGATGGC  
TATGTTCAACTTGCGGCATCCGGATTCCAAAACCGGATTAACACCTATTCATATAGNAATGTTTCGGATAA  
CGTTATGTTCCCTGAAGAGTTCCTATTGGAAGCAGGAAGTTCATTACTTCCAATAATGGAAAACGTTTTAG  
AGGTGCACACCTCATATAAAAATCAACTTTGAACTTTTCGCTGAATATTTGAAAATAAATAATAATAC  
TGATGGTGAAGATTTTGAAATAATGATTAAATCCCATCAAAGTGAAGATGTGTGTGGCTACGAAGTCTTCTG  
ACTTAGAAGAAATATTCGTGAGCCACTCATACATCATAAGTTCAAAGATGGATGAATTCGAAGAGAGAGA  
TAGTGGTTGGACTCTCATAAAAATTATACGTTTGGAATGAACGTCAATAAATAAAGCCGCTAAGAGGC  
TCTAGTTTTATTCCATTACCACGGAAATTGAGCTTGAAGAAAGCTATTATTAATATAAAAAACGACGATGA  
GTTTTGCTTTAAGTGGGCTTTAATAGCAGCCCTAAAGAACTTGCAACATAATGCTGATAGGTGTGCCCCAT  
ATAAAATCGATGATATAAGGAGTCCAATTATTGAAATTGATGAGATATTCTCACTCAAATTTTCATAATATG  
GAATTTCCATTAAAGCTCAAAGACATTAAATTGTTTGAGCAACAAAATACTTACTTAAGTATAAATGTCTT  
TGGCTATGATGAAGACATTAATGAAATTATTGGACCACTCTATCTAACCAAAGAGCACCGGGGAAACATA  
TTAATCTATTGCTTTTGGAAGCAAGATATATCCCATTATACCTGGATTAAGAATCTATCAAGGTAAGTA  
AAAAAAAAAAAAAAAAAATATACATTTCTTTTTTTAATATCAATCATATTTCTCCTCCAGGCTTACACACAA  
TCAGTTGACTTCGCATACGAGGAAATTACATTTCTGTAATGTATGCTTAAACTATTCGCATAACGACAGGA  
TGCATGGCGAGCAGTGTGAAAAGTGGTGGCGAAGCTTCCAACAGCGGATAAGGCGAGTGTAAAATTTAA  
GAATTATGCAAATAGTTTATAGATATACCTTTTATAATTTATTTCAGTGCCTTTTAAAACCTATCAACAGGAAT  
GTGAGCGAGAATGTAATGAGCATTCAAGAACACATTCCTGTTGCATACGCATATTTTCATAAAATCTGCAT  
ATGATTCTAGTTTAGATAAATTCGTTATATATAGTGGAGAAAATGTAGGATTACATTTTGTAAACATCTCTC  
ATTGCNGATGCAAGAGAGATTTATAGCAAATATTTATCTACTGTAAAGCCAATCGAAATGAGCTTAGAAA  
AATTGCCACATTTGCACTAAGATNTTAACTTANATAGAGTACGGGATCATTGNCCTTAAGTGGTAAATT  
TAGAGGGGCGAGCTCATAGTGCTGTAAATATANATTACAAAATTGCCNCATTCATCCCCGTACTTTTTATAA  
TTTTTCACGCTATAATGCTCATTGTTTGTAAAGAGAGTTGTCAAAAAGTTGAAGGTGAAATTAAGGTTCTAC  
CCTCTCAATAAAGAGATTTACATTTCCCTTTCAAATACACATATATTACAGAGCATAATACAAATTTGGA  
AATACGTTTTTACTCATTTTCGATTTATGGCT

>Ref\_dvir\_532

ATTAATTACAAAGTATTTTAAAGTGTCAATGTGAGTGCAGTGCACATATTATATGTTTGATACTAAATCA  
ATTGTCGTTCCGCTGCGAACAGGCTCCTCCCGTCCGAAGTTCGAAGACTTTCAACCGATGTGTTCTCGATAG  
GCAGAACGGCGATCTTTGTAATAGCTCTCTTGTAAGTCCGCTTGCAAGTTTGATCATCTCCATCATCTCCAT  
TTATTGATCTGTCAACTCGGCCGAGAGGTCATCTTAGAGGGGACCGTTATCCTCCTTGAGCAGCAAGTTGT  
GGCAAGGCTGCAAATTTTCTTAGGAGCTCGCCACTTTCCACGCTAAGCGATGCTCCACTTTTGTCAAAAAG  
GTCTGCTGCATGTGGCAAACACGCTGCCAGCGGCTAGGACGATTGATGTTTCAGATGCGTCAAGTCGGGTT  
CGTCAGTAGAAGTGTGACTTCCCCCAGAGAGCGTGGCCAGACGAAAGTACCTACAAGTCACCTGGATT  
TTCTGTAATAAAAACAGAATATAACATGGCGCATATATGGCAAATAAAGGTTTCAGCATTGCCAACGACGC  
GGTAAAAATGTTGTTTGGCTGACTTCACTGCGGCTTGCCACCAAAAATGTGGCGATTGTGGCGGAGTAAAG  
TGCATTCGTTGACAGGCTACGTTTCAGGCTCACTCATGAAAAGGTTAGACTGATGAATCTTTTTAACGCAGC  
AATAAAAGACGGAGTAGACAGATCTTCTATTAGCTCTAAGTTGAGAAGCAAACAAAATGGAGATATAG  
CATTTTGTTGACGACCGATTTCTGACCCTACTGGATGCTGTTTATGAGTTCTTTGAGATGTGTTGCTTGTTT  
AATCTCGTCCAGAGTTAAGAAATCTTTGGACCGAAGTGAGTTCGTTTGAATGTAATAAATCGAAAAATAT  
ATGCGAAAATACGCTGGAGCTTTCCAAATGAATTTTAAATTTACACGATGAGGTCAAATCCCTTTGAATT

GATAGGACTAGTGTATTGTGACGACGCTCTGGAAGCTCCAGTTGATAAACACTGTCTTCAGGCCGTTCTCA  
GCCGCTGGAGCGCAGGAATGTCGGACCGTTGTGCCTAGGATGCGATTATATGAGATCCAACGGCGTGCAT  
CCACGTAATAAGATGTCAGCAGGGCTCTGCTGGAACGGCACGTAAGTGCGTTCCTGGATTTGTGATTCCC  
GGTTAGGAACGAAAACATTGAAATTAGACGGCCTTTCTCGTATCCATATACCATATATTTTCATAATTTGCT  
AGCGGTGTCATAGCAAACCGTGGAATTTTCAGACTACGAACATATGAGAGTTACGAAGAGAGCTGAAAC  
CATACTGAATGCAATGACTGCGGAAGGCTTTTCGTCCCACCTGACCTTGTCTTCTAAGGTGCTTGAAGAAA  
AATCTAAAAAAATAATCCGAGCGGATCGTAAAATCTGGCTATTGTTGCCTTTTGCTAACAGCTGCTTTAT  
TTGATGTCGAATTTGCCGGGTTCTCGATGGAATCAACTACAGAGACATTGAAGTCACGGCGGATGCTCTT  
GGCAGCCATTGGGAAAATGCGCTCCTCGTCGTAAGTAAGCAGTTGCATCGTGCGGATGGCAATAAACGCA  
GCTGGTTTAGTTCCGTATGTAAGTGTATCCAAGGAGTATGTTTTAATCCGGGCTTGATTTTCGCGCCATAA  
GATGCATTGCAGGAACCTGGTCTGGAGGTGTTATGCGTACCGCAATGATACATCCTACAGATGTCACCGCA  
AGATGCAAACTTA

>9\_rnd-1\_family-428\_\_LTR\_\_Gypsy

ATTCAAGCTAAAGAAATCGTAAAAGATCACACAAAAATTTACAATACCTTTCAAATTGTAATAGTTACAA  
CACTTTGCATAATTATAAGTGCCATAATATTGTATATTATCTATAGGTTCAAAGCATTACCCACAAGAATA  
ACTGTCAAATATAAGAAACAAAAAGAAGATCAATCGTTCCTATAGCAGATATGTGCTGTAGTATTCCGTA  
TGTAATACGATTTTGCAAAAATGAAGGGAGCATAGTGAAATCTTTAAATGCCGAGTTTAATCAAAACAA  
GAAGAATAAAATTCTGAAATCGGAGCCGTACGATTGGCAATGAAATACACTGAAATATTAAGGAAAATC  
AAAGAGCGAATTAATTTCCCTATTGGGCGCCACAGTGTCTAGTTTGGAGAAAGCGTCTCAATTCATCAAT  
TGCGCTCAGCTCAGCCCGCCAGCCAAAGAGGGCCAGATGGGGCGTGCTTCAAGTGCTGGAGTATGGATCAT  
CAGTATGCGCGGTGTCCTAAGCGCAGTACTACAACAACAATTGCAGCAGTGCAAGGCAACGAGGGGCACG  
GGTGAGATGAATAGTAACGAGTTAGCAGCTGTTCAATTAATACAATTATGAGTTCCGTTTGGTGAAGAAA  
GAGGCACAAGTGTTTTTNGTTTATTCGATACGGGGAGTCCCGTAAGCTTTATTCATAAGGCATTAAGGCAT  
TAATACCAAAAAATATAAAGCTAAAATCTGAAGTCAGTCAATACCATGGATTAGGAGGACGGCCTATCCC  
AACTCGGGGAAAGTTGAAATGCCGAATTAATTTTCTTATGAGAACCTATATAATTTCACTTAATATTGTAG  
ACGATAAGATATTACCTCTACCAGTATTATTAGGAAGAGATACTTTAGAAATCATTGAAGNAAAATTAGT  
TCATAAGAAAATTATTAATGCTGAATATCATCTTTTGAGTAGACACAGGTGCAGACATTTCAATAGTTCAT  
ATCGTGGATTTACAATTCGCTATTCCTTGTGATGNCATAATAGGAATCGATTTTATTAATAAAAAATATAACT  
GTCAATTAGACTTCAAGCAATCTGAAGATTGGCTTATAATTATACCTAATAACTTAAAATTTTCAATCTAT  
AACATACAGTTCTGGCAACAACCTCAATACTTCTGCCAGCAAGATCCCAAGTTATTAGAAAAATTCAACTA  
AATTCAAAAGAGGACAGTGTATTGATTCCAAATCAACAAATTAACCGTGGTATTTACATTGCAAGTACCA  
TAGCAATAACTGAAAACGCTTTCATAAGAATACTTAATACAACAATAAAGATCAAGTAGTCAGTGCAAA  
AACTTAAAGTATGAATCACTTTCGAACTACGAAGTAGTCAAACTAATACAGAAGATAGGGAAAAGTCT  
GTATTATCTCAACTTTCAAAAAACTTTCCACCACAATTCAAGTCACAGCTTTCAAACCTTATGAACCAATA  
TAAAGATATATTTCGGATTGGAAACAGAACCAATAAGCACAAATANTTTTTATAAACAAAAACTGAGATTA  
AAAGACCAGTGTATACAAAACTACAGAAGCCCACACAGTCAGGTGAACGAAGCACACAGAAGCAAGTT  
GGAAAATTAATCACCGACGGGATTGTTGAACCATCCGTATCTGAATATAATAACCCATTATTACTTGTCCC  
TAAAAACCATCTCCAGGTTCAGAAGAAAAGAAATGGCGATTAGTGACTGACTATCGTCAAATTAATAAAA  
AATTATTGTCCGATAAGTT

>Ref\_dvir\_1071

CTTCCGATAGACACACCTACGCATAAGACACAGGTGCGCTCCGGTATCCACTAAACCTTTGCAAATCACA  
TCTTTTAATTCTAAGCCAGAAGATATGAATGTGCTTAATGACTTTAACATCCACTTTTCGTATCGGACAAC  
ATTCGTGCACTTACCACATTTAAAACAAGAAAAAGTATATTTGGGACAGTCCTTTATTGCATGTGAGTCGG  
CACCACATTTAAAACATTTACGGCTTTTGTTTGCTTGAAAGTATTGACCCACGGTAGGCTCTCTTTTGGCAA  
TTGTCGATCCAGGTTTACTGGGCGGTGCGCAAGAACCACGAGCTTTCTGATAGGTTTCTATCTGAGCTTTC  
AACTGTTTGATTGTTTGAGCTTGATACAATAGTGATTTGTTAGTTTTAGAATCCGGTATGCCTTCTATAAAA  
TAGTCAATCAAACTCTCATCCTCGAGATCGATAGATTTTGCTATTTCCATCAACGCATATAAAAATTCTAA  
CAATGTCTCGCCCTTTCTCTGCTGTCGCTTTCCCAAACGTCTATGAACTTCTGCTGATGACAATCTTACCTC  
AAATTCATTTTTCAATGCGTTCTTTAGCGCTTCCCAGTTATTAATACCCCGCTGACTACGAATAAATGATTT  
AGCGGCACCCTCAAGCAACTGTTTGGCATAGATAAACAACCTGTAAGTCGCTCCACTGTACTGTTATAGCG  
CATTCTTCTAACTCACTACCCACTGTTCAATATCTCTCGAACTCGACCACGCTCAACATCTTTCTGTTCAA  
ATAGTCTTGCTTGCGTTTTACTTTGCGTCCTGCAGTACTCAATTGCAAATCTGTTAATTTTTCGCGTAATTG  
ATCGACACGAATACTTAGAATCTCGTTTCTCTCCATCTTACAAAATTGTCACACGGTACTTAGATTTTAG  
GTTTTCAAATTATTCTTATTTACCATTTTCAGATTTGATATTCTTACATGTAAATTTTCAGCACAACAGCTT



CAGTTTGTCTATGTTAATTAGTAATAACAGCGGCTGCTCTCTTTTGTAGCTTAAGTTTAACAGCCTCGACG  
GACACTCTTTTGTATCTTGAGTTTAACAGCGCTAAGGGACGTTTGTTTTTGAATTTGTTCTCAGCAGTTATC  
AAAATGTTAAACTATGTTAAGGAATAATGTCGATGAACATAAAACAATTATGCTAACAAATAATTTAAA  
TTTTCTTCCGTGTTTCATGTTTCGTGTCACCGTCCGTGGCTAAATTTCTTAGTTAATAATGTAGGATCTGTCT  
GCGCAAGATACAACACTTGCTAAGGTCAGCACAAATAGTAATTTGCAGCGCTGCTGCAGCTCACCACACG  
ATTTTAACGTTTCCCAACACTCCCACGATGGACTCTGTCTGCTAACTCTAACTCTGACTCTGACTCCGACTCT  
GCTCCAGCCTTCTATTACGCTCGACCACCTTGCCAGCGTACCAAGAAATTGCTACTGTCTATTTACGCTT  
GGCCAACTTGCTGCGTTCCCTCATAGATGACCAGCTGCTTTGATCGTTTTGGTTTTCCCTTACGCACCAGCA  
AAACGCCAACTTTACTACAGCCTTCTATTACTTTTCTCTTCTCTTCTCTCTCTCGTTCTTTCTGTATGCTTT  
ACATTTGGCGATGCATACACACAAAGGCCGGATTTACCAGAAATTTATTTTTTGAATTACGTTTCAGTG  
AGCGTCTGTTGCTATTTTCGCTCACTACTTTACTTTGCACTTCTCTCTTCTCGTT

>9\_rnd-1\_family-440\_\_LINE\_\_CR1

TCCTCTAGGTATAATAAAAATCAGCCTTATCCTTATCAGCTACAGAGGTCAAACCTGCATCTTAAATCCNAT  
TATTACCGAAAGTTTCGCTTCNTAGCGACCTTAACACTATCAAGCCTGGTGGTGTTCCTGCTTGCGTGCTTA  
GGTACTGCGCTGCAGCATTATGTAAACCTGTTTTAAACTTTTTGAATTGTCCGTAAACACTTCATCTCNTC  
CGACCATTTGGAAGGAATCATACATTATCCCTCTCCANAAGAAAGNGACTAAGTCCGATGTTGAAAACATA  
TAGAGGTATTTTCAAATTATCCGCTATACCTAAAGCTTTTGAGAGAATTGNAGCTATTCAACTGCAACATT  
TATGTAGTTCTATTATTTACCTTCCCAGCATGGGTTCGTGAAGCGCAGATCTACAACCACTAACCTTCTTG  
AGTTTACTTCGTTTGTAATTGATGGGTCTAAGAAAAGAATGCAGACTGACGCCATCTACACTGATNTCAGT  
AAGGCTTTCGACTCTGTCAACCANTCCTTGCTGCTTCATAAATTATGCCTTCTCGGCTTCCCAGTCAATCCT  
TTGAACTGGATTTCAGAGTATTTGCGTGATAGAACCCAAAAGGTTCTTTTCAGAAATTCGTTTTCTAAACG  
TATTCTGGTGACTTCCGGTGTTCCCTCAAGGTAGTGATCTTGGCCCCGTTACTCTTTTCATTAATGACCTTCCC  
TCGATACTGTCTCACTCTCGAGTATTAATGTATGCTGATGATGTAAAATTATGCCTTGCGTATAAAGATAT  
GGCATCATGTTATCATCTTACAAGCTGACATTGATGCGTTTCAGGCTTGGTGTCTAGCCAACCTTTTAAAC  
TCANACTGCTCTAAATGTAAGGTAATGACCTTCTATAGAAGCCCTCCTCAATTGGTTTCTTACATCCTTGAT  
AGCTTACCGCTCGAGCGTGTTAACAGTACTTCTAATGAAGTTAATGATCTAGGTGTCATCCTTGATCATAA  
ACTTAAATTCGACTCTCATGTAAAGACCGTGGTCAATAAGGCCAGAATAGTTATGGGTTTCATCAAGCGAT  
GGTCGAAGGAGTTCGACGATCCGTACACGACAAAAACACTTTATATATCTCTGGTACGACCTATTCTTGAG  
TATGCCTCATGTATCTGGTCACCACAATATGCTATCCATCAGGACAGAATTGAATCCGTTTCAGAAACAATT  
CTTGTTGTTTGCCCTTCGTGGTTTAAATTGGGATCCTCGCGTGCGGTTACCGTCATACTCCAGCAGACTTCT  
GATGATTAACCTTCCCTTCTTTGATTAATCGTAGAACCATGTTGGGTGTAATATTTATTCATAAATTAATTAC  
TGGTGAAATCGANTCTTCTGTGTTGACTAGCCAATTAATTTCTCTATCCCTACTAGACTAACACGTAATTT  
TGTACCCCTATCGCTTCAATTTTGCTCAACTAATTATGCTTTGCATGAACCGTTCAGGGTTCTCTGTGATGA  
CTATAACAAGCATTACAGAGTATTCTGCTCGGAGTCTTCTCTTCCCTCGTATAAAGTCTTCTATTCTAAACTA  
TTTAGCAAGTAGATAGTCTTATTTTTATTTGTAATTGTATTTGTACACATACTCGTAGTTTGTATCGTTTTTT  
TTTTTTTTTTTTTATTTTTACTTTGCATTTTCGTGTCGTACGTTACACGACTGCGCCCCCGGTCGGTTGGGCGG  
GAGGTGGGATGCNGTACGTTGCATCGGGATTTCGCGTAANAAAAAAA

>Ref\_dvir\_656

AGCAACAAACACGGCGACCCAAGATAGCCGGCTAAATGAAAAACTTAAAAAATTGAAGGTGTAAGTGCA  
GCAACTTCCATCGCCGGTTGAACGGCAACTAGTAGTAAATGCTCGGCAATACTCGCAGATCAAAGCTCCG  
AAGTTCAACAATTGCAATTCTCAACTTTGGTTTGCAAATTGGAGCGCTTGTTTTTTTTTGACAATGTTATAA  
CTGACAATCGCAAGTTCGACTTGGTGTCGGTACAGTTCGAGAAGGATGTCGCTCTCACCATCGAGGATCTC  
ATCTGAAATCCACCTCTGAATAACAGATTCGGCGAATTGAAGCAACGACTCCCCGAAACATTTGCGGAAA  
CAGAGGACTCAAATTAAGAGACTACTGCAGGGTGGTGGTATGACCGGGAAGCCGTCGGTAATCCCTAC  
ACACATGCTTCGTTTAGCACCCACTACTGGCTGCGAAGCCGTTATGTGCACTCTATTTATCGCCAAGCTGT  
CAATGTCCGTTTCGTCCGCTAATTTTTATCTGGGAGGAAGACGACCTAAATAAGTTGGCAAAAATCGCGGA  
CAAGATGCTGGAAAATAGTGGAATGGAACCGACTTACGTAATGCCGACACAACTGTAAGTCTGAGCA  
AAAACAGCAGAATATTGTCAGTAACAATAGTCTCAGTTTAACTGATTTAGCGGGCCGCTTGCACGCGCATT  
CGCAGAAAGTCGATACGGACGAATGTGGTAGCTCTACACGTACAGGATCTGTATACTAATCATATCTTCCCT  
CGTTGATTCTGGATCTGTGGTATCAGTTGTGCCTTGAACAATGACAAACAGAAAACCTTCAAAAAGCTAAA  
CTGCAATTATATGCCGTAAGCCGAACCATAATACAAACATATGGCAACCTATACCTAGAGCTCAACTGGA  
GCCTGGGTAGTGCTTTTAAAGTGGTCCTTTATCATTGTTGACTCGCAAGCGGCAATAATTAGCGCTGACTTT  
CTGTTACCGTTCCACTTGCTCATAGACATCAAGCAAAAACGTCTTATCTCCACACAGGAGCACCTAACTTT  
CGGCAGTTCAATCAACCCGTAGCATTTCGAAGCAGCAAATAATGCACGAAAACACATTGACGTAGGCCT

CACGCAAAACATACAGAAGCGTTCAGCAAGGCCAACAACCTCACACAAAAAGCGCGTATCACATGCATCA  
CAACTGGAGCACCAGTAGCAGATTGTCCACGGCGACTGATGGGTGAGAACTGTCATCAGCGAGAGCAC  
AAATCCATCAACTTATCGACGAAGGAATCTGTCTGCGCAAGCCTGCTGCATATGATAGCAAAGACCAGTGA  
TGGTTGGCGGGCTTGTGGCGATTACAGGAAGCTTAATGCGATAACAACCTCCTGATCGTTATCCGATACCAC  
ACATACACGACTTCGTAGACCGGTTACAGGGTAAACTCATTTTCACAAATTAAGACTTAAGAACGCGCAT  
ACATACACAGCCATCGGTGCAGTACTGAAAAAATTCAACAGAGGTACACGAGAACCCCTAAGGTTTCTCT  
TCAAAATAACTAAGCGCAACGAAAGGCACATATGACAGGGGAGCTACTAGCAATCTTTGAAGCGATGATGT  
ATTTCAAGCATATGCTAGAAGCAAGGGTTTTTCGGGCAATAAAATCTGATCACAAGCTGCTGATATACGCA  
TTCCTTAAAAAACCTGGAAAAGCATCGGAGCGCCAACTCCGCCAATTAGGATTTATCTCCCAATACTCC  
ACAAA

>160\_rnd-5\_family-4071\_\_LTR\_\_Gypsy

GTAGTGGCGCTTGAAGCAAGAACAAATTTGTTTGAGTTTAAAATAAACAGCCCCAAAAATAGACAATGTAAA  
TCCAGCCCAANGTCTTGTACCTTGCTTACCCTAGTAGATCTCGCCATCTATGGCTCANCCCCGGGCGTAATAT  
CGCTTGTAACGAGTGAAAGAGAAAAAAATAGTAGAGGAATGTTAATTTGATAATTGGAAATGGCGTCTG  
TCCTGGTGTGCTGTAAATAGCTTTCCCTAAGCCGATCGGAGCTCAGATCTTTCTTTTACCTTTGGTCCACC  
GTGGAGAAAGGTTGACTCAAAAAAAAAGTAAGAAAGTGCGCCTATTTACAATCGCGCTTAACCTCTGAGA  
AACAGTATTTTCTTTTGAAGCATCATTTTAAATAGAAGTAATTTCAAAAAAATATCTAAGTGCCCGCATC  
GATGAACCACTTCTCAGCCGCCAGTTGGTCGCAAAATTAATTGAGAACTAAAAATAAAATAAAAAAAGT  
GCCAGACCCAATCAGGGGTAAGTTAGATTTTTTGCTAGACCGTTTTTTTTTTTTTAAAAAGCACTTATATTT  
AACCTGTCTATTGCAGGTATGGCGCTTCGTAATATTCTCATCAACANATATAATGAGATATTATAGTCTT  
TCGACTTTCTGCAATTAGCAGCGGCAAACATTTTTTTTTTTTTTGCCTGCCGAAGCCCCAAAATATGCAGAG  
CGCCTGTAATTGTCATCGTTAATTCGCCTTGTCGCAAATAGCTTAATCAGCTGCGTCCAGCTTTATCGCATC  
TCGTCAAATCTCGTTGTTTCGTTTCGTGCTCTCTAGCCTGCTCGAAAATGGGAGTTCGAAAGACGAATTAG  
TAAGAGACGATCGCCGTCGCCGAAACTCCGAAAATTAGTTGGAGATCGTTTCTTGGTGGCTGACGTCGTC  
AAAAGCAGCTACATTTATCTTGGTTCGCGCAATCATTTTTTNCATATAAGCGAAACGAAATCTTATTTTTTTT  
TTTGTAGTGTNATATTTTTTTGCTGAAAAATGAATAATTAGCTTAGCTAACAAAAAAGTGAAAAAACTGA  
ATAAGTCCTATTGTGAACGCCATGGGCGTAGTCAAGTCGCCTTAAGCGCATAATTTAAAATTTTACAATTA  
GTTATGTGCGAGTTTCTCTTTTTCTTTTTTTCGGCAAAGAGTGCAACCGCATGGTCAAATTCCTATTCCGT  
CGTTTTTTCTTTAACTCCGTTTTTTTTTCTCGCCTTCCATGCTCCGAAATTCGGATCGCCATATTGCTGGTGAG  
AGCCAGATTTCAAACAAATTCGAAAAGCAACGTATAAAGAGAAAGAGAGAGAATACAAGTCACATGAAG  
TTCGAAAAAATTTTATCTAGTGCCTTCTTTTTTTTTTCTTCTAAATTTTTTTTTTGTGCAATTCGAAGTGATTTT  
TTTTNCAGCAGATCATCGCACATTACATCGATGGAAGCGCTTTCGGAGATGGAGTGAATGCATGTAAGTG  
AAGCAAAAAAACTCTTAAATTGTATTTTTCTTTGCACTTAATTTCCGAGAGATAAAGAGAATGGCCNAAT  
AATAAGTTAATGGATAATTTAATGCCGCGTTNAAGAGCAAACGAATCGGCGAAGAGAAAACGTTAAGAG  
AATAATCTACTTCAAGTGAGCGTTAAAGCTTTCGCTAAATGAATCAAAAATTAATGAAAGGAATAATTT  
NTACTTTTACCGATTCGGGTCACAGACCAAATTAGAACCTCCCCGTC

>9\_rnd-5\_family-3263\_\_DNA\_\_TcMar-Tc1

ACATACCAGTTTGTCAAGTAATTGTTTGCAAAAANGAAAAACAGCACACAAATTCATTTTTAACTAATATT  
TTACCGAATTAAACTATTTCTTCTTAATTTTTTTTTTGCATATTATTATTATTCTAAGTATTCTTCATAGATA  
TAAGGCACAAACATAACAAAATTCAAAACGCAAATGTAAAAACAGACAAAACCTAAAATGAGGCAATTTT  
TGCGCTGTCAATTAATTCTTTGCAAAATGCAAACACAATTCGAAATAGAGCCCAAGCTACCTAACGGTAC  
TCCAAATTCGAAGAAATTTGAATGCGTGAGTCATTGATATGCAGTGTGCGAACCTTCTAAGCGATTTTGCG  
TTTTTGACAGTTTACATCTTGCTTAATTTAGAGCTTTTTGCAATGCCTGGTCAACGAGTTAATGAAAATCTA  
ATTCAATTAGTTTATTTCCACTACCACAAGGGGAAATCTGCTAAAGAAATTTGGCGGAAATGTTTCGCAATTA  
AGCTAAGAACTATTTATAATATTATTAACCGCGCCGAAAAAGAAAACAGATTGGAATTAAGCACTCCGG  
AGGCAGACCAGCGAAGCTCACTAGACGCGATCATGAAAAAATTTTAAAACAGATCAACGATCAACCCTC  
AACTAGCCTCCGACAATTGGCATCGGACTTAAAAAATGACTGCAATAAGACAGTGAGCCACGAGACAG  
TTCGTAAAGTCTTAAAGTGCAATAAATACTCCTCGCAAATAGCTAGGAAGAAGCCACTACTGTCCGCAGT  
AAATATTCAGAGGCGGCTTANTTTTTCTATTGCCAATGTCAACAAGCCCCGCGGAGTACTGGGATGACGTTA  
TTTTTTGCGACGAGACAAAAATAATGTTATATTATCATGACGGACCCAGCAAAGTTTGGAGAAAGCCCAA  
TGCAGCTCTGGAATCGAAGAATATAATACCAACAGTAAAGTTTGGCAAGCTTTCGGTTATGGTGTGGGGC  
TGCATATCGTCGAAAGGTGTTGGTGAGCTGCGCATTTTCAATGATGTGATGACGAAAGAGTTTTACTTGGA  
CATTCTAAAGAATGAATTGTCAAGGAGCGCAATAAAGTTTGGCTTCGAAGACCCCCAAAACCCCAATAAA  
CAGAGGTACAAGCTTTATCAGGACAACGACCCCAAACACAAATCGTTTTTGTGCAGGACTTGGCTACTGT

ATAATTGCAGCAAAGTCATTGACACCCCTGCCCAGAGTCCTGGACTTAAACCCAATTGAAAATTTGTGGG  
CTTTCCTAAAGAAGCGCGTAGGGGAAACGGAGCCCACTAANAAAAACGCTTCTCATCAAGGCCATTCAAG  
AAGAATGGATAAAAATACCCGAAATCTATGACCTGAATAACCTTATTCACTCAATGTACGTCGTCTGCG  
GGCTGTAGTGGATGCTAATGGCCAATATACCAAATATTAGTACCACCATNGCTATAGTTTCTAGATTTAG  
TTATTATGTATATAGTAATATTTTGCATTTTGTCAAAGAATTAATTGACAGCGCAAAAAAATTGCCTCATTTT  
AGTTTTGTCTGTTTTTTTACATTTGCGTTTTGAATTTTGTATGTTTGTGCCTTATATCTATGAAGAATACTT  
AGAATAATAATAATATGCAAAAAAAAATTAAGAAGAAATAGTTTAATTTCGGTAAAATATTAGTTTAAAAA  
TGAATTTGTGTGCTGTTTTTTCATTTTGTCAAACAATTACTTGACAAACTGTATGT

>160\_rnd-1\_family-210\_\_Unknown

GTCCTGTGTCTAACAAATCGAATGATCCAGGGGTTATCCNNGGCAGCTTACGAGATATCAAGCCGATTTTCG  
CATCTCACCCAAATGCGGTCGCTTGGTTGCAATTAATATTTCAAATTTAACGGCCGCCAAATTCCATTTCGG  
CATGTGCGCTGTGTACAAAATTNNAACCAAATTCAGCTGAATTACCAGGCGAACAGAAATGTCAGCAGG  
TAGCCAAAAGTCCGCGACACCAGAACAAAATTAGATTGTGCGCCGGCGCGCCATTGGTCAAGCGCAAATC  
CATGATGGCTGCTCGGCGAAATATGTAACCTGTAACCTATCCTTTTGCTTTTGATTTCCTATGCATATTCGTCAA  
TATATAGTGATGCGTAAGCACGCAGGTGATGCGCCGGATTTGGCTGAATAATGCGATATCCGCTAAATCT  
AGCCGTTTATTTTGTACGGATGTCCGCAAATTTAGTAAATTGAGTCCTATCTTGGGCAGATGATATACTCCG  
ACTTGAGAAAATAGCTATATACATATGCTATGTCATACGCTTGCAAACCTCCGTCCTGTGCCTAACAGATCG  
GATTATCCAGGCAGCGTACGAGATATAAAACCGCTATCGCATCTTACTTAAATGCGGGGTTGCTTGGTTGC  
AATTAATAATTTAAATTTAACGGCCGCCAAATTCCATTTCGGCATGTGCGGCTGTGTACAAAATTTGAACCA  
AATTCAGCTGAANTACCAGGCGAACAGAAATGCCCAGCAGGTAGNCAAAAGTCCGCGACACCAGAACAA  
AATTCGATTGTGCGCCGGCGCGCCATTGGTCAAGCGCAAATCCATGATGGCTGCTCGGCGAAATATGTAA  
CTGTAACCTATCCTTTTGCTTTGATTTCCTATGCATATTCGTCAATATATAGTGATGCGCAAGCACGCAAGTG  
ATGCGGCGGATTTGGCTGAATAATGCGATATCCGCTAAAACTAGCCATTTATTTTGGCGGATGTCTGGATA  
TATATTAATTTGAGTTCCTATCNTGGGCAGATGATTATTTTGGACTCGCGAGAGTATTTTAATTTTATTAA  
ATACTGTCAAATTTTAAATTTGGAATTTTNTTGCCAATCGGACATTTTATCCGCATGTGTCAACTAACTAT  
ATATTTTCTCGATCGGCGTATATTTATTCTATATTTAGCTTTATTTGGCATGCATATACACATATTTCTTATA  
ATAAACATATAGAGTGAAGGAAGATATGTCCTGCTTAAGAAAATAGCTATATTCATATGGTTATGTCAGA  
CGCTAGCAAACCTCCGTCCTTGTGCCTAACAGATCGATTGATACAGGGGTTATCCAGACAGCATACGAGATA  
TAAAACCGCTATCATATTTTACTTAAATGCGGTTGCTTGGTTGCAATTAATAAATATTTAAATTTAACGGC  
CGCCAAATTCCATTCGGCATGTGCGGCTGTGTACAAAATTTGGAACCAAATTCAGCTGAATTACCAGGCGA  
ACAGAAATGTCAGCAGGTAGCCAAAAGTCCGCGACACCAGAACAAAATTCGATTGTGCGCCGGCGCGCC  
ATTGGTCAAGCGCAAATCCATGATGGCTGCTCGGCGAAATATGTAACCTGTAACCTATCCTTTTGCTTTGATT  
CCTATGCATATTCGTCAATATATAGTGATGCGCAAGCACGCAAGTGATGCGGCGGATTTGGCTGAATAAT  
GCGGTATCCGCTAAAACTAGCCATTTATTTTGGCGGATGTC

>Ref\_Paris

CAGTTTGTCAAGTAATTGTTTGTCAAAGTGAAAAACAGCACACAAATTCATTTTATAGGCTTATATTTTACCG  
AATTAACTATTTCTTCTTCATTTTTTTTGCATATAATTATTATTCTAAGTATTCTTAATAGATATAAGGCA  
CAAACATAACAAAATTCAAAGCGCAAATGTAAAAAAAACAGTCAAAACTAAAATTAGGCAAATATTGCG  
CTGTCAATTAATTCTTTGCAAAAATGCAAAACACAATTCGAAATAGAGCCCAAGCTACCTAACGGTACTTCA  
AATTCGAAGAAATTTGAATGCATGAGTCATTGGTATGCAGTGTGCGAATGCCTTCTAAACGATTTTGCAT  
TTTAACAGTTTACATCTTGCCTAATTGAGAGCTTCTTACAATGCCTGGCCAACGAATTAATGAAAACGTTA  
TTCAATTAGTTTATTTCCACTACCACAAAGGAAAATGTGCTAAGGAATTGGCGGAAATGTTCTCAATTAAG  
CTAAGAACTATTTATAATATTATTAACCGCGCCGAAAAAGAAAACAGATTGGAATTAAGCACTCCGGAG  
GCAGGCCAGCAAAGCTCAGTAGACGCGATCATTCAAAAATTTTAAAACAGATTAATGAAAATCCTCAAAC  
TAGCCTCAGACAGTTAGCATTGGACTTGAAAAATGACTGCAATAAGACAGTGAGCCACGAGACAGTTTCGT  
AAAGTTTTTAAAATGCATAAATACTCCTCGCAAATAGCTAGAAAGAAGCCACTACTATCTGCAGTAAATA  
TTCAGAGGCGGCTTAATTTCTCTATTACGAATGTCAACAAGCCCGCGGAGTACTGGGATGACGTTATTTTT  
TGCGACGAGACTAAAATAATGTTATACTATCATGACGGACCCAGCAAAGTTTGGAGAAAGCCCAACACAG  
CTCTGGAACAAAAGAATATAATACCAACAGTAAAGTTTGGCAAGCTGTCTGTAATGGTGTGGGGCTGCAT  
ATCGTCGAAAGGTGTTGGTGAGCTGCGCATTTTCAACGATGTGATGACGAAGGAATTTTACTTGGACATTC  
TGAAGAATGAATTGTCAAGGAGCGCAATAAAGTTTGGCTTCGTAGACCCCCAAAACCCAGTAAACAGAG  
GTACAAGCTTTATCAGGACAACGACCCCAAGCACAAATCGTTTTTGTGCAGGACTTGGCTGCTGTATAATT  
GCAGCAAAGTCATTGACACCCCTGCCCAGAGTCCTGACTTAAACCCGATTGAAAATTTGTGGGCTTTCTTA  
AAGAAGCGCGTCGGGAAACGGAGCCCACTAACAAAACGCTCTCATCAAGGCCATTCAAGAAGAATGG

ATAAAAATACCCGAAATATATGACCTGCATAACCTTATTCAGTCAATGTCTCGTCGTCTACGGGGCTGTAAT  
GGATGCTAATGGCCAATATACCAAATATTAGTACCACAATAGCTATAATTTCTAGATTTAGTTATGTATA  
CAGTACTAGTTTGCATTTTGCAAAGAATTAATTGACAGCGCAATATTTGCCTAATTTTAGTTTTGACTGTTT  
TTTTTACATTTGCGCTTTGAATTTTGTTATGTTTGTGCCTTATATCTATTAAGAATACTTAGAATAATAATT  
ATATGCAAAAAAATGAAGAAGAAATAGTTTAATTCGGTAAAATATAAGCCTAAAAATGAATTTGTGTGC  
TGTTTTTCACTTTGCAAACAATTACTTGACAAACTG

>9\_rnd-6\_family-1025\_\_RC\_\_Helitron

TCCAATGGCAGCTATGATATAGTGGTCCGATCCAGCTGGTTTTTCACATATGAGCTGCGTGCAACGAAAG  
AGGGACTTCTGCTAGATTTCTTTTAAAGATATAGCTTTAAAACCCCGAGAGCTAGTTCGCATAGAAACAC  
ACAGACGGGCAGACGGACATGGCTCTATCGAATCGCGGGCTGCACTGATGCATTTATGTATCAAGAATAT  
ATATATCATGAGNNGGATTTGTGTATCTTGGATNTTNTTCAGNATGCGTTACATATNCCACGAACAAAATT  
ATANTACCCNCTGCAAGNGTAAAAGGCGGTGCAAAGCCTCTCGCTTGCAAGCATTGTCCAAGCGCGATCT  
GCACCTACACACCAATTCTAGCTGGAAAGCCTATGTATGGATATTATATGGATGTTTGCAGATGCGATCAC  
GCAACGAGAAAGTCAGAACGCCGGACACGCCCAATAAATGTAATAGAGGAAAAAGAAGTGTGGTGACTT  
ACATGCATCGGCGGCGAAAGGCCCTTCCAACGCTGGCGACGGTGTGTTGGTTCATGAGTTGTGGGTTGGT  
ATGGTATAGATCTTCTTGNTCTCGTTATTTTTTTATACCCTTGCAAGAGGGTATTATAATTTTGTCTGAAAT  
GTGTAACGCATAGAAGGAGACATCTCCGACCCCATAAAGTATATATATTCTTGATCAGCATCAACAGCCG  
AGTCGATATAGCCATGTCCGTTGTCCGTCTGTCTGTTTCTATGCGAACTCGTCTCTCAGTTTTAAAGCTATC  
TTAATGAACTTTGCAGAAGTCCCTCTTTCTGTTGCACGCAGCGCATATGTGAAAACCAGCCGGATCGGAC  
TNCTATATCATATAGCTGCCATAGGAACGATCGGTGCAAAATTAAGTTTTTATATGAAAAAACTTTTGT  
TATCAAGATATCTTGACCAAACCTCGGCATTTATTAGTTTCACTNTTNTCTCCTCGTATATNTGCGAAAATNCT  
ATTAAGATATCTTGACCAAACCTCGGCGTTTATTAGTTTACTATGTCTCTTCATATATATGCAAAAATCCTA  
TTAAGATCGGANCACTATATCATATGGCTNCCATAGGAACGATCGGTGCAAGGTTAAGTTNTTGTATGAA  
AAAAACATTTTGTTTTTTTCAAGNTATCTTGACCAAACCTCGGCATTTATTAGTTTACTTTACTTCTCATAT  
ATGTGCAAAATCCTATTAATATCGGACCACTATATCATATAGCTGCCATAGGAACGATCGGTGCAAAAT  
TAAGTTTGTGNTATGAAAAAACATTTTTTTCAAGATATCTTGACCAAACCTCGGCATTTATTAGTTTACTA  
TGCTCCTCATATATATGCAAAATCCTATTAAGATCGGACCACTATATCATATAGCTGCCATAGGAACGATC  
GGTCGAAAAATTAAGTTGTTATGAAAAACATTTTGATTATCAAGATATCTTGACCAAACCTCGGCATTTACT  
ATTTTCCCCTTCTTAGATAGGGGCGAAGCACTATGAGCATTATGAAAAGGTTGGGTCTGCAAAGGGTATT  
ATTAGATCTTTGGCGCGCCGAAGATAGCCNTTCTTTCTCGTTATTTCTTTGTTTNCCTTTTGCGGGTGCAC  
TCCACAAAAGTAAAAACAAAAATNGTTNACTACTTATGCATGTNNATANTTATTTTATTTTTTCGATCCTTA  
TTGTTATTATTTTTTTGTTATGTTTGTA

>9\_rnd-5\_family-1695\_\_LINE\_\_I-Jockey

ATTCTTATCAGGAATAAACTAAATTACATTTAAGAGGATTGGATCCAATGTGCACTTATTAAGTCAATAC  
TGTGCTGGGCGATCTGAAAATTGCTGCCGTTTACTGTCCACCGAGACATAATGCTAGAGATGACAAGTTTA  
ATAGGCTGATACATACCCTTGGCCGCAGGTTTGTATAGGCGGTGACTTTAACGCCAACTTTGCTGGTGG  
GGCTCTAGAAGAAANAACCCAAAGGGACAAGCGCTNATTATGTAGATTCAGACCGAAAACNTCAACCAG  
GGCACTTAGTCATAGCCCGAGGATTCCAGACAGGGAAATCCATCATTGGAGCCTCCCATGTTGCTGAGCT  
CCTCCACGAGAGACGGAGACTCCAGGNGCGTCTGGTCCCGNCAAAAAAACTCCAGGGGGCTAAAGACCGC  
GCTTANTGGAGCCACCAAGGCTTNAAAGGGCTTAAAAAGATTGTAAGAGAAGCCAACAAGGTGGAGCAG  
CTCTTCCAATGGATGCCTCGATCTCAGGCATTTTTTCTAATCCTGGCAAACCNGAAGCCAATCTCGCCTCA  
TACCGTCTGGATTAGATTACTAACAATACTCTCCAAAATTCTGGAAAGAGNCGTCCTGCGTAGAGTGCTCT  
CAGTCTTGACGAGGCTGGCCAAATTCTCGATTACCAATTTGGTTTCAGGTTTGCAACGCATCTTGAGGGC  
GTTTTTAAATAGAAAATACTGCTGCGCCGTAAGTCTGGCATCCTGGGCTTTTACTCAAAAATCAGGAGCA  
ACCTGTGCCTGCCGCAGGCAGTTCCATGCAAATGTGGAGAAGCTATCTCTCGAATTAACTCATTAGAGC  
GGGAGTTCCCCCAAGGCAGCGTGCTGGANCCCCTACTATATANCATCTATAGTGCGGACCTTCTGTTATT  
GGGAACCCTAACNTTCTAGTCGCCACATATGCTGATGACACGGCATTCCTCGCCACTGCTGACACACTTAA  
CGAATGGCAGAGGAGATGGAACATCTTGGTGAACAACGAAAAGTCCACAGCCACCACTTTCTCTCTCAGG  
CCTGGTAACTGCCACCTGTCTACCTAGGCGGAGCTGTTATACCAGAAGAAGACGACGCCGAAATACCTT  
GGCATGACTCTCNACNGGAGGTAACTTGGAGAGCTCACCTTTTAAAGAAAAGGAAAAGAGCTGAAGTC  
AAGCTAAAGTCNTATTACTGGCTTATTGGCCGTAAGTCCAAGCTTAGTACTCGGTCAAAGCTCCTTGTCTA  
CAAGGCAATTATTAAACCGATTTTCGACTTACGGCATTCAGTTATGGGGTACTGCCAGCCGAAGCAATCTA  
AGNTTATTTTCAAGGTTTTTCAAAACANGGCACTGCGCATCGTATCATGACAACGCTTCCATCCACAGTGCTC  
TCAAGATCCCATGGGTGAGTGACGAGATAGCCAAAAGCTGCAGTAGATACCTGCATAGGCTCCACCTGCA

CAACAATAACCNAGCAGTTGGCCTGCTGGACAACAGCGACACCATCAGAAGACTCAAGAGAGTACACCC  
TCTGGNTCTTCCAAGGGAACCAAAATAATTCAATCATTTACTCCCAACACTACCGAACCACCAACCATTAA  
TTAAAAATCGACATATATTACAATAGGAAATATCTACAAATGAAACACACCTAGNTAAGTACCCTTCAAA  
ACATTTAATAATTGTCGACGCGTGACAGATTTAAA  
>160\_rnd-1\_family-232\_\_DNA\_\_TcMar-TcI  
ACACATACAGTCACGGACAAAAGTATTGGCAATTTAATATTATCTTGTGTTTTATTGTCGGTTTTGTCCAATAT  
ACCGTCTAATATTTAATAATTTTATATTTTTTCATACGATTATTAGCTATTTGTGCATGCAATCTAATTATTTT  
TATAAACTTTGGCGGCATGGTTAATTTTTTAATAATTATTTAATTCCAAGTACCCGTAATTTTATAGGGACA  
AAAGTATTGGCAATTTTCAATATAAAGTTGTTATTTTAATATTATTTTTATATGGTCACACTTTTCTTTGCA  
AAAATGNAACTCTGTAAGCACCGTTATTTGAATCTTAAAAAATACTTAGAAAAAATTGTTTAAGCAT  
CAATTTATATATTATTTTGCAAAAATGGCCGGTAAGAAGTGTGAAACCACCGTAGAGCAGCGAAAAATTA  
TTTTAAATTTACGCAAAACAAGGCAAATCCTTTAAAGAAATTGGCGAGCTATTGGACAGAAGTCAATTTAC  
CATTCGGAGCATAGTCCATAGATTTTCAGACGACCCTACGGTAGAAAACGCTGAACGCACCGGCCGCCCA  
CGAAAGTTAACCGATCGTGATTGCACCCAAATTCTGAGAAAAATCGAGAAAAATCCACAAATTTTCGCTTA  
GGGATATTGCTCAGGAGTTCAAGGAAGAAAGTGGTGTGATGTGTGCACACGAAACTGTCCGAAAATTACT  
GAATTTCAATGACTACACATCACGAGTTGCCAGGAAAAAACCTCTACTATCGGCGGCGAATATTTTGAAG  
CGGCTATCGTTTCGCTCAAGTCCATGTAAATAGTTTGAACGATTTTTTGGAGTAACGTCATATTCTGTGACGA  
AAGCAAGATGATGCTATTCTACAACGATGGGCCATCCAGAGTCTGGAGAAAGCCACTAACAGCGTTGGAA  
AACCGCAATATTATTCCAACCGTTAAATTCGGAAAACTATCAGTGATGGTGTGGGGGTGTATTTTCGAGCA  
AGGGTGTAGGAGATTTGACCTTCATTGAGAATACCATGGATGCTAGACAATATCTGAGCATTTTACAGAC  
ACATCTCGTCAGTAGTGCACAGAAATTTGGATTCTATGAGGACAATAAGCCAATTTTTTAAATTTTACCAGG  
ACAATGACCCGAAGCATAAAGCTCATATGGTAAGAGTTTGGCTGTTGTACAACGTGTGGAAAGGTGTTAGA  
CACTCCACCACAAAGTCCAGATATGAATCCAATAGAAAATGTGTGGTCATATTTGAAAAAAAAGTCGCA  
AAGCGGAGTCCAAAATCAAAAACCTGATTTAAAAGCTGCTGTACTGGAAGAATGGCAGAAGATTCCAGAA  
ACATACATACAAAACCTTATTGTTTCAATGAAACGGCGATTGCAGGCTGTATGTGACGCTAATGGCAGCC  
ACACAAAGTATTAAAAAAATATTTCCTGTTTTTTTAAACATTGTTATTTAGTAATAAAGTTTCGTGTAAAA  
ACACTTTATTGACAGCATAAAATTTGAATGTTTTTAGTTTTTTAATTTTATAAAATGTTTGGGTAATGTTAT  
TTAACAATTCTTTTTGCCATTAAAGTTCTAGGAAAAATATAGAATCGAAATAAATTAGAATTGAAAAAAA  
TTCTCACTTTTAGGTACATTTATTTTCAACTAAACCCAAAAAATTAGTTTTTTTTTCGTTAGTCAAAACACTT  
TATTGACATACTGTATAT  
>Ref\_Polyphemus  
ATACAGTATGTCAATAAAGTGTTTTTACTAACAAAAAATACTAATTTTTTGGGTTTAGTTGAAAATAAAT  
GTACCTAAAAGTGAGAATTTTTTTTCAATTATAATTTATTTTCGATTCTATATTTCTCCTAGAACTTAATGGC  
AAAAAGAATTGTAAATAACATTACCCAAACATTTTATAAAATTAAAAAACTAAAAACATTCACATTTTA  
TGCTGTCAATAAAGTGTTTTTACAGCTACGGTAAATTGTTTTGCCGTTCTCTTTTGGGTGATCCCGTTAGAT  
TTGGGCCCCATGCGTTTTGGCTTCTCTTGTGTCTTCGACTTTTCTTGTCAATTTTCTATTGCAATTTATAACGTT  
TTGCTTTAATTTTATGAAAAATAAAATGCCAGGAAAAAGAACAACCTTTGAAGTCGCTCAGCTGGTGTATT  
ATAACCATCAGATGGGACGTCAAGTCTCGGAACCTGGCTGATATGTTTAATTTATCAAAAGCAACGATATA  
CAACATATTAACAGAGCCAATAAGGAAGATAGGCTAGAGGCAAAGCCAGTATGTGGTTCGACCCTGCAA  
AATTTCTGACAGAGATAAGCGAAAAATTCTGAGAAAAATTGAGAAAAATCCACAAATTTTCGCTTAGGGAT  
ATTGCTCAGGAGTTCAAGGAAGAAAGTGGTGTGATGTGTGCACATGAAACTGTCCGAAAATTACTGAATT  
CCAATGACTACACATCACGAGTTGCCAGGAAAAAACCTCTACTATCGGCGGCGAATATTTTGAAGCGGCT  
ATCGTTTCGCTCAAGTCCATGTAAATAGTTTCGAACGATTTTTTGGAGTAACGTCATATTCTGTGACGAAAGCA  
AGATGATGCTATTCTACAACGATGGGCCATCCAGAGTCTGGAGAAAGCCACTAACAGCGTTGGAAAACCG  
CAATATTATTCCAACCGTTAAATTCGGAAAACTATCAGTGATGGTGTGGGGGTGTATTTTCGAGCAAGGGT  
GTAGGAGATTTGACCTTCATTGAGAATACCATGGATGCTAGACAATATCTGAGCATTTTACAGACACATCT  
CGTCAGTAGTGCACAGAAATTTGGATTCTATGAGGACAATAAGCCAATTTTTTAAATTTTACCAGGACAAT  
GACCCGAAGCATAAAGCTCATATGGTAAGAGTTTGGCTGTTGTACAACGTGTGGAAGGTGTTAGACACTC  
CACCACAAAGTCCAGATATGAATCCAATAGAAAATGTGTGGTCATATTTGAAAAAAAAGTCGCAAAAGC  
GGAGTCCAAAATCAAAAACCTGATTTAAAAGCTGCTGTACTGGAAGAATGGCAGAAGATTCCAGAAACAT  
ACATACAAAACCTTATTGTTTCAATGAAACGGCGATTGCAGGCTGTATGTGACGCTAATGGCAGCCACAC  
AAAGTATTAAAAAAATATTTCCTGTTTTTTTAAACATTGTTATTTAGTAATAAAGTTTCGTGTAAAAACAC  
TTTATTGACAGCATAAAATTTGAATGTTTTTAGTTTTTTAATTTTATAAAATGTTTGGGTAATGTTATTTAA  
CAATTCTTTTTGCCATTAAAGTTCTAGGAAAAATATAGAATCGAAATAAATTAGAATTGAAAAAAAATTCTC

ACTTTTAGGTACATTTATTTTCAACTAAACCCAAAAAATTAGTTTTTTTTTCGTTAGTCAAAACACTTTATTG  
ACATACTGTACATA  
>Ref\_NewTE7  
TGTATATAAGGTTTCGTAACGAAATTATACGAAACTATCAAAATATTACTTCAAACACTCGACAAATCGAA  
AATGTTGTTAAATCAACTCGCACGATGGAATAAAATGAGAATTCAAAGCATAATGTGCAATAGAGAACCG  
TTACATTCTATATTTAGCCTATGCTGGAAATGTCCCGTTAGATTTGCTTCTAAAAGCCGTTGTTTTGCTGAA  
ATTTTATTGTAACGAAATTATACGAAACAATCGAAAAACTGATCTTTAGGCGTGCGTATCAACTTTGTTTG  
ATTTGTAGTTTTGAATTTTATCAATTTTATTTAAAAAATCATTGAAATGCCACGAGGAACGCGTTTGACTG  
AAGAGGAAAAAGGGAAAAATTCTCGCTTTTAAAGCCTCTGGCTTATTAATTAACCAAATTGGGAAATTAAA  
TTGGTCGAACATGCTGCGTAATCAATAATTTTTTACAAAATGAGGAAGGATACGGCAGAAATAATAATGC  
TGGAAGAAAAATCCAACTGTCTGGCCGTAACAAGCGTCAAATTTTGAAAAAAGCAAGTAATTCGACCTTG  
TCGTGTCGTCAACTTGCTGCATACAGCAGCATTCCAGTGTACCAATGTGCGTTTGGCGTACTTTAAAAAC  
ATCCAAACATATAGTGCGAGGAGTAATGAAGAAGCAGCCAACTCTCAAAAATCACCACAAGGCAGCACG  
ACTTGAATTCGCTTTTAAAAACCTTGATACGTGCTGGGACTTGGTAAGGAATCGTTGTCTTGTAATGTTGC  
ATGCAACATGCAGATGCAACACATGCAACATAAGATTTTTTAAATATTTTTTTTTTAAAAAGGTTATTTTTTC  
GGATGAGAAAAAGTTTAATTTAGATGGTCCAGATGGATTTTCGCGGCTATTGGCACGATTTGCGTAAGGAA  
CCCCTCGTATTTTCAAACGGAATTTTGGAGGTGGTTCTGTTATGGTATGGGGTGCATTTACCAAGTGTAG  
CACCTTGAACCTCCGCTTTGTTACTTCAAGAATGACAAGCGTAGATTATGTGGAAGTGTGGACAACACTC  
TCCTACCCTTCCTACAGGATAACAGGGAAAGTCCTTACATTTTCATGCAAGATAACGCAAGAATTCACACC  
AGTCGTACACGATGGCCTACCTATTGTCATCCTCAGTCAATACTTTGGACTGGCCTGCGTGTTCACCTGA  
TCTGAACCTTATTGAAAACCTCTGGGGAATTTCTTGTACGTCGTGTTACGCCGAAAATAAGAAATTTGATA  
GTGTTACTGAACTAAGAAGGAGGATTTTAAGAGAATGGACAAAATTGGATCAAACCCTTTTAGCAAATTT  
AATAAACTCAATGAAAAGAAGGTTATTCAATGTAGGAAAAGAACAAGGAGGCCCTATTTAATGTTCAAAT  
TTTTTTTTTAAGCCATTATCTCAACGACTTATGGTTTTATAAGCTAAAAAAACAAGTTTTCGTATAATATCGT  
TACACTCGAAAAGTGAATTTTTCTTATTTTTTCAAATATTTTAAACCTATGAACATTTAAATGCCTATGT  
TATTATATAATGTTGCTTTCATATACATTTTCGAAAATAAAGCATTACTATACTTCTAAGATTACTCAAACA  
AAAAAAAGTTAACAAATAAAAAAGTTTCGTATAATTTTCGTTACGCACCTTATATATATATATA  
>Ref\_dvir\_964  
CATACATATTAGGTTTCATAAGCCTGGTTCGGCAACCTGCCAAGAATTAAAAAAACACAATTGCAAATAATC  
GAATTTAACCAATTGACAAGCCTCTACAGACAATATGTATCAACATTCAAATTGCTAGCGAATTATATATT  
GTACACATATGAACACACTGGTCTGCTGGGTGGTTGCCACCCAAATTTGTTAGTGTA AAAAATTGGTAGA  
AATCGTTCAGCTGGCACTTATACATATACATATCCAAATTTTCCCAACAATTGTGATTGACACTGCTAAAC  
TGAGCATAATTTCTGACTCTTCACCAATTTAAATATAATTCATAATCCATATTTTGCTTGATAACATTTTG  
CTAGGTGATCGTCGATATATCGATACAGCGACAGGCGTGCTGATCTCAAACGATACTTTTCTCTCTGCCGC  
CGTAGGCGATAGTCTCGAAATTGTCATAAGCTGCGAGTTGTCTCTATAAAGTGGTCGTGGGTTTAAAATT  
GGCGGTAATTGAAAAAGACATCGAGCAAGTTTAACTTATTA AAAACACTAACAGTGGAAGCATTTATTGC  
TGATATAAACCTAAAGCGTGTTCAATAAGCAAATTAAGGTATTTCAAAAAATTCCTCAAATTAGTGTGTG  
AAAATTATTTTGCAATTAACAAATAACCGGTGTCCGTCTGTGAATTGCCAAGCAACAAATTGAAGGCCTA  
ATTACCACCAAAAGTGAAAGACATATAATAAAGACCAAAGTCCCAATTCAAATCTGAGAATAACTGGGGT  
AAGGCTCAAACCAAAAAAATTTTTACATATATAACCCCAAATTTGCCCAGTTGAGTCTCGAAATGGAGCGC  
GCATAATAATTTATCACAAGCGTCACCTATACATGCACAAACTTGCAGCTGCAGACAATTTTGGCGACG  
GCCACAGCGGCGCCCTGCCAGACTGACGCACACACACACACAAATTTTCTAAGAAATTTTCTACCCAA  
CATTGCCAGGCCTAAAAACCACATACGGACAGAACTATATTCTACGCTAGCATCTATTATTTACACTTTCT  
TATTTTTTGCTAACTTTAAACATTTTTTGCAAATTTAAAACATACAATTA AACATTACTGCCAAGCGATCATC  
GATACATCGATACATATACGCGCGCACTGATCTCAATACTATACTTCCACTTTGCCGTCCTAAGTGATA  
TTCTTGAAATTGTCATGAGCTGCGAGTTGTGTACTACGATATGGTTGCGAATGTGAAACTGTTCAAACCTTA  
TAAATACCCTAATAGTGAAAAGCATTTAATGCTTATAAGGA ACTAAAGTACGAATTAACAAATTTAGTG  
AATTTCAATCAAGTGTAAGTCTTTGAACTAACAGTGCCTATAAAAGCCCCAAATAGCCGGTGTCTGTCTG  
TGTGTAAATAGGCACATATGCAATTAATTGTAAGTGAAACATAATTCAGGGGCTTCTGACAAGTGAAATTT  
AGTCCTGCATGTCCAAAAAGAGTCCCAAAATAGTGTGTGCCAAGTGTGTCCACCTGCATGAATAAATGCA  
TATATCCAAACACAAATTTAATCTAGTGAATAATCCACCAATTTATGCCATACA ACTCCAATTTTGTCCAT  
AAAAGTCTGAAAATAGTGCGCGATCAATTATTCACAATTTTAGAGGAACCAATTTAAAGGCCTAAC  
>160\_rnd-1\_family-350\_\_Unknown  
ATATACATACAGTCACGGACAAAAGTATTGGCAATTTAATATTATCTTGTTTTATTGTTCGGTTTTGTCCAAT

ATACCGTCTAATATTTAATAATTTTATATTTTTCATACGATTATTAGCTATTTGTGCATGCAATCTAATTAT  
TTTTATTAAACTTTGGCGGCATGGTTAATTTTAAATAATTATTTAATTCCAAGTACCCGTAATTTTATAGGG  
ACAAAAGTATTGGCAATTTTCAATATAAAGTTGTTATTTTAATATTATTTTATATGGTCACACTTTTCTTT  
GCAAAAATGNAACTCTGTAAAGCACCGTTATTTGAATCTTAAAAAAAAAACTTAGAAAAAATTGTTTAAAGC  
ATCAATTTATATATTATTTTGCAAAAATGGCCGGTAAGAAGTGTGAAACCACCGTAGAGCAGCGAAAAAT  
TATTTTAAATTTACGCAAACAAGGCAAATCCTTTAAAGAAATTGGCGAGCTATTGGACAGAAGTCAATTT  
ACCATTCGGAGCATAGTCCATAGATTTTCAGACGACCCTACGGTAGAAAACGCTGAACGCACCGGCCGCC  
CACGAAAGTTAACCGATCGTGATTGCACCCAAATAATAAGAAAGATCAAGAAAGACCCAAAAATCACAT  
CATCCAAAATAGTATCAGAGGTTAAAGAAGAGACTGGGAAAGAAATTCACTCCAAAACGGTACGGCGGG  
TACTACACAAGGCTGGGTACAATGCGAGAATTGCAAGACGCAAACCACTCATTTTCGAGTGTTAACCAATC  
GAAGAGATTGGCATTTCGCCAAAGAATTTAAATCGAAGCCATTAACCTTACTGGAACGATGTCCTATTCTCC  
GACGAAAGTAAGTTTAATATTTTTCGCTCAGATGGCCGCATTAAAGTGTGGAGAAAACCCAATACGGCAT  
ACAATAGTTGCAACTTAATGCCACAGTAAAGCACGGTGGTGGAGGTGTTATGGTGTGGGGTTGTATGTC  
CGCAGCTGGTGTGGGTGAACTAGTTTTCATCGAAGGAACAATGGACAAGCGTGTTTACTTGGAAATATTG  
AAGGCAAATTTAAAAAAAAGCGCTGAAAAGTTGATGTTAAGCAGTCAGTTCACTTTTCAACAGGACAATG  
ATCCAAAGCACACGGCCCATGATGTGCGAATGTGGCTTGCCATACAATACAGCTCATGTTCTTCCACATCCT  
CCTCAATCACCAGACCTCAATCCAATCGAGCACCTATGGGAGGAACTAGAAAAAAGGCTTAGAAAGCAT  
ACATTTTCAACAAAGACTGAGCTTAAAGAAGCCCTAATGGAAGAGTGGCACAATAATTGAGCCAAATGTTG  
CCCGAAAATTGGTGCATTTCGATGCCAAATCGCCTGGAAAGCGTTATAAAACAAAAAGGCATGCCGACTAA  
GTATTAATTTTATCTCATGTTTTATTTTTTTAAATTTTAAACACAATTATTTAAGTTTTTGCCAATACTTTTG  
TCCCTATGAAAATTACCATATTTTTTGTTTTTTATTTGTAAGGCTTGAAGCAACAAAAAATGTTCCTTTTT  
AATACTTTTAAAGTGAGTTAGATATTTAAAAGATCATAAAAAAATATATTTCAATAAAATAATAAGTTGG  
TTATTCTCAAATTTTGAATTTTGTAGTTGACAACACCACAATTGCCAATACTTTTGTCCGTGACTGTA

>Ref\_dvir\_887

AATAATGGGTCCCATTGAGATTGGGATTCCCGTTGGGAGCTCTCCAGCGCAGCCAATTTCTTGTCAAGGCA  
AGTTTGATTCTCGCTGAAGCTGCTTGTCACAATTTGACCAGATTCCGCCCTTTTGGGCGGAGCAACGTCGG  
CGTAAGACATACTGCATCTGACAGTCTCAGCCGGGATGAATCCACGTGAAGGGCCTTGGTTATATTTTGGC  
CTGGCAGTGTTGCCAGTAGCAGAGAGCCTTGGGATCGGTTTCATTTTTTGTCTTTCTTAATCCTGACGGG  
GCAGTCTTTGTGCGTCGACGCGTGATCACCACCGCAATTGACGCACAGGAAATTTTCACTCGTGCAAAGC  
AGAGAACCAGTCATATGAGAGCCAGCGCATTGTCACGGATTGGGTCCCGAAGGCAATAATTTTTGGAAT  
GACCGAAGAAGAACTTCTTTTCTGCGAGGAGCACGCTCCACTGAGACTCTGTATCTGCCGAGTTGTGTAAT  
TTTCAAAGCATTAGACACATTGGGTCCTTGTTTTAGATTGACAAAAAATTGATTTTGCCTAGTCTTGTAGTT  
GATCGTCGCTTCATCGTCTGTCTCGTTGACCTGAACGTTACGCCAATCTGCCTTTCTTGGGCAATATATATT  
GAGAGTTTCGAAACCCTGGTCAGTAAAAGCTTGCAGCAATTTGTGGTTTGGGGACGTTGGCATTAAACGCCCT  
TGACGACAACCCTGTAAGGCTTTTCCTCCTAAGTTGATGGTGCCAGAATTGACAGTTAAGTTTGTCAAAT  
GTCTTACAGCTGCTCGGAAAGCGTCAGAGTTTGCAGGTGTATATCCATGATACACCGAACTTAGAGGTGCG  
AATGCTATAGTTGTTGGCACCCACGCACGAGTCTAGTGCTTGTTCATGCCTAAGGGATTGTTGACTTGTG  
GTACAAATATTGCTGGAGGCTTTGAGAGCGTTTTTGTAGGATTGTGTGTTTCCGTTGCCAACAGCACGAGCT  
TCATCTTCGTCGTCAGAATCGCTTCTGACAATCCTTGTCTCCATCATGTTGTCCGCTTCTTCGTCCAGAGCT  
GCAAAACGGTTTTTACTCAGTGCTGCTGCAGTCGAGGTGGATGCCGTGTCTTTGGCTACTTCCCTTGTGTAG  
CTCAGCGGGCTTCGACTTAGCTTTCTGTATAGATTTAGATGTGTTTATAACTCCCTTATGTTTTTTACTAGC  
AGGCAGGCCACGGTCTTGAAACGAGCACTTCGTCTTACGAGATGCTGCTGACAAGAATTCACCCAATGTG  
TTGTCAAGTGACGTAGTCGAGGAAATGTTAGGCCCCACAGTTGCCGCTACAGTATACGTAGATGTAGATG  
TCAAACCTTGCTTGCAGCATAGAGATAGTGCAGGTAACGCTGGTATCAGTGCTTGGTGTACTGTGCGCCCA  
GTTATCACCCGATTTGACAATAAGCTGTTGTTTTCTGCAAAAATGGATGCTACGCTACCGCGGATTTGAGA  
GCGTAGAGTTTCAAGGCTTATCCTTGCTGCTTTTCTCATCTCCTCCAGTACAGCTTGCCCAATACTAAGTAG  
CGACTGATTCCATGAGTTAATGTCCAAAACGTCAAATTGTTATTAATTAGGAGTCCAATAATGGCATTGTC  
GTCCACCTTTTCCGAATCAAAGAATAAGAAATTACGGAAACCAACCTCTC

>Ref\_dvir\_942

GTGAAAAAACAAGCAGTAATAAGTTTATGTTGATGATATTTTACTTGCCAGGTCAAATAAAGACGAATT  
GTTGAAAATCAAAGCATCCATTGCCAGGGAATTCGACATTGTTGATGGCGGCCAGCTCAACCATTCTTGG  
GCATAGAAATTGAGCGCGAAGGGGAGACTGGAAGCATAACAATCGGCCACAAGCAGTATGTGGAACAAA  
TGCTACATACTTGTGGCATGTCAACGTGTAGGCCTGTAGCTACACCACTGGATGCAAGTCACCAAGTCAA  
ATGTGATGACGTCAACTGCGAGATGGTTAATGAAAAGAGCTACCAATCATTGATAGGTTCTTTGATGTATT

TAGCCATAACAACCAGGCCGGACATACTACATTTCGGTAGCGAAACTGGCACAACGAAATGCCAGCCCTCA  
CTAGGAGCATGAAGTTGCAGCGAAGCGTGTGCTAAGGTATTTAAAAGGCACGGCTAATATGAGACTTCAT  
TATCAGGATACTGGCAAGCAGATCTATGGATACGTCGACGCAGACTGGGCGAACGATGCTGCAGATCGAA  
AATCATATAGTGGATATGTCTTTATTGGTGCGGCAGCGCGATTTCTGTGGGAATCGAAGAAACAAAGTCTG  
GTGGCGTTAAGCAGCACTGAAGCCGAATATATTGCCTTATCTACCGCAGCAAGGGAAGCAACATATATTA  
AAAAATTGTTGCATGATATGGGATTTATAGAAACCAAGCCTATTTTATTGTATTGCGATAATCAAAGCGCA  
CAGTGCTTAGCTGAAAATCCAATTTTACATAAACGTAGTAAGCACATCGATATAAAGTTTCACCATGTACG  
CGAGCTATATTCTAAGAACGAAATAGATGTTAAATATATAGGTACTAATGATATGATTTCCGATGTACTAA  
CTAAAAATTTGCAAAAGAACAAGCATGTAAATGTATTAATGAAATGAATTGTTATTAATAAGTTTATGTT  
GATGATATTTTACTTGCCAGGTCAAATAAAGACGAATTGTTGAAAATCAAAGCATCCATTGCCAGGGAAT  
TCGACATTGTTGATGGCGGCCAGCTCAACCATTCTTGGGCATAGAAATTGAGCGCGAAGGGGAGACTGG  
AAGCATAACAATCGGCCACAAGCAGTATGTGGAACAAATGCTACATACTTGTGGCATGTCAACGTGTAGG  
CCTGTAGCTACACCACTGGATGCAAGTCACCAAGTCAAATGTGATGACGTCAACTGCGAGATGGTTAATG  
AAAAGAGCTACCAATCATTGATAGGTTCTTTGATGTATTTAGCCATAACAACCAGGCCGGACATACTACA  
TTCGGTAGCGAAACTGGCACAACGAAATGCCAGCCCTCACTAGGAGCATGAAGTTGCAGCGAAACGTGTG  
CTAAGGTATTTAAAACGCACGGCTAATATGAGACTCCATTATCAAGGATACTGGCAAGCAGATCTATGGA  
TACGTCGACGCAGACTGGGCGAACGAATGCTGCAAATCGAAAATCATAAAGTGGAATGTACTTTTTTGG  
TGCAAGGCACCCCGATTTCCGTGGGAATCCAAAACACAAAGTCTGGTGGCGGTAAACCACCATGAAAGCC  
GATTAAATTGCCTTATCTAACCAGCAGGGGAAGCAACTAAATTAATAAAAA

>160\_rnd-1\_family-222\_\_LINE\_\_R1

ACACACACACACACACACACACACACACACACACACACACACACACACACACACACACACACACACACAC  
CACACACACACACACACACACACACACACACACACACACACACACACACACACACACACACACACACAC  
ACATACACACACACACACACACACACACACACACACACACACACACACACACACACACACACACACAC  
ACGCGTTTGTAACTGCTCCGCTCGAAAAATAANCAAATCGGTGGTTTTTCTGAGAAAATTATAGTGAAGTT  
AGTGCACGTGTGATCCGTGTCATAGGCCTTATACACCAAAGGTGCGTGGCGGTACTCACTGCGAAGCCC  
GTGCAGAGCGTTCCTGGTGGTGGCGTCTACTGCTCCACGATCCAGGCGAGGGGAATGGAGGCGTCTCCTT  
GGCGTGTTTTTTGCCTTATTGTGAGTTTTATCACTCAAGTTTAGTAGCCGGCGCGCGAAGCTATTTGTGA  
AGTTGGTTGCATTCACTCTAACAGCTGTNAGTAGTGTGGCTAGCGCAGCTCACACCAGCTAATCTGCAC  
TAGTGAACCAGCGGCCAAACTGCGTAGCGGAGATACCAACCAGGCGATAAGCTGTAACCTGGCAGAAAGT  
ACGGCATACTTTCGGGCTTACGCTGTTCTTGCTAAGCATTTAAGCTTTGGAGAAAGAACAGGCAAAGAAG  
CCGATATCGGTGCTCACTACAGGCTCCAGGGCAAAAAGGAGCAAAAGGTCGCGGAACAGACCAATTTT  
CAACCCCCCGCCGCGGCGGTGCCATAAAAACGGGGCTCTGGTGACCGAGTCGGAGCGGTATAACTCCCA  
GCGGTTAATAGCCAGAGGGAAACCGTTGGCCACCGAGGGACTTTCCTGTAGAGCCCTGATAGTTAGAGCA  
GGTGCCCAGAGTGAAAAATGGAGGATGAGCTGCATGCCTTTGCGCGCCGCTCTGCACTACAGCGATCACC  
GTCACACCAGGCGGTCACGCCAGTGCAGCAAAGAGTGGCTGCGTCGTCGCCGGCAAAAGCGAGTGAAGA  
GCTGCCAAGAACGCTAAGAGGCACGATTGAGAAGATGGGCTTAGTCCTAAACGGCTTAACGGCGCTGTTT  
AACGGACAACGCCACATTAACGGGCTGATGCGAGAGGAACTCGCGAGAGTAGAAAGCCTGCAGAAGGTG  
GCGCTCAAGCTCTGTGCGCCGGAACGAAGTGCGACGAGGCGCAAACGACGCCGTCATTAGCCAGACGT  
GCGGAGCCGAACGTGCTAAAGACGCGCCCAACGAAGCTCGGGGGCCAANAAGAGGCAAGCACGCCCAA  
ACGGCCGAGGGATGGCGTGCCAGAGCAGCGCAGAACTCCCTCCAAGAAGGCTAAACGCCAGGGTCAAAA  
CCCAGCGAAGCAATGAGCATGGCATTCGCAAGACCGCGAAGGGCATTGGGTGACCGGACGGAAGTAAGA  
ACGCTAACCGAAACGTCCCAGGTGGAGATCAAGGACCTGGATGAGCTGGCGACTAAGGAGGAAGTGCTC  
GAAGCAATTAAGCGCCTTAAATGACGACTTCCTGTTGATCAAAGCGATCAATCGCGGCGAACTGCATT  
TGGCGGCCAGCAAAGGGCCACNGTTACTCTCTCAGCGCCAANAGCCAGGAAGCTTGT

>9\_rnd-1\_family-315\_\_LINE\_\_CR1

TCGCTTCTTAGCGACCTTAACACTATCAAGCCTGGTGGTGTTCCTGCTTGCGTGCTTAGGTAAGTGC  
AGCATTATGTAAGCCTGTTTTACAACCTTTTTGAATTGTCCGTAAACACTTCATCATCCGACCATTGGAAG  
GAATCATACACTATCTCTCTCCAAAAGAAAGTGACTAAGTCCTATGTGCAAAACTANAGAGGTTTTTTCAA  
ATTATCCGCTATACCTAAAGCTATTTAGCCATTTATGTAGTTCTATTATTTACCTTCTCAGCACGGGTTCG  
TGAAGCGCAGATCTACAACCACTAACCTTCTTAAGTTTACTTCGTTTGTAATTGATGGGTCTAAGAAAAGA  
ATGCAGACTGACGCCATCTACACTGATATCAGTAAGGCTTTCGACTCTGNCAACCAATCCTTGCTGCTTCA  
TAAATTATGCCTTCTCGGCTTCCCAGTCAATCCTTTGAACTGGATTTTCAAGATATTTGCGTGATAGAACC  
AAAAGGTTCTTTTCAGAAATTCGTTTTCTAAACGTATTCTGGTGACTTCCGGTGTTTCTCAAGGTAGTGATC  
TTGGCCCGCTACTCTTTTCATTAATGACCTTCCTCGATACTGTCTCACTCTCGAGTATTAATGTATGCTGA



TGATGTAAAATTATGCCTTGCGTATAAAGATATGGCATCATGTTATCTCTTACAAGCTGACATTGATGCGT  
TTCAGGCTTGGTGTCTAGCCAACCTTTTAAACTTANACTGCTCTAAATGTAAGGTAATGACCTTCTATAGA  
AGCCCTCCTCAATTGGTTTCTTACATCCTTGATAGCTTACCGNTCGAGCGTGTTAACAGTACTTCTAATGA  
AGTTAATGATCTAGGTGTCATCCTTGATCATAAACTTAAATTCGACTCTCATGTAAAGACCGTGGTCAATA  
AGGCCAGAATAGTTATGGGTTTCATCAAGCGATGGTCGAAGGAGTTTGACGATCCGTACACGACAAAAAC  
ACTTTATATATCTTTGGTACGACCTATTCTTGAGTATGCCTCATGTATCTGGTCACCACAATATGCTATCCA  
TCAGGACAGAATTGAATCCGTTTCAGAAACAATTCTTGTTGTTTGGCCCTTCGTGGTTTAAATTGGGATCCTC  
GCGTGCGGTTACCGTCATACTCCAGCAGACTTCTGATGATTAACCTTCCTTCTTTGATTAATCGTAGAACC  
ATGTTGGGTGTAATATTTATTCATAAACTAATTACTGGTGAAATCGANTCTTCTGTGTTGACTAGCCAATT  
AAATTTCTCTATCCCTACTAGACTAACACGTAATTTTGTACCCCTATCGCTTCAAATTTTGCTCAACTAATT  
ATGCTTTGCATGAACCGTTCAGGGTTCTCTGTGATGACTATAACAAGCATTACAGAGTATTCTGCTCGGAG  
TCTTCTCTTCCTCGTATAAAGTCTTCTATTCTAACTATTTAGCAAGTAGATAGTCTTATTTTTATTTGTAAT  
TGTATTTGTACACATACTTGTAGTTTGTATCGTTTTTTTTTTTTTTTTTTTATTTTCATTTTCGTGTCGTACGTTAT  
ACGACTGCGCCCCCTCGGTTCGGTTGGGCGGGAGGTGGGATGCAGTACGTTGCATCGGGATTTCGCGTAAAAA  
AAAAAAA

>160\_rnd-4\_family-287\_\_RC\_\_Helitron

CTCAAGTATTTCAAATATTTATCAAACCTATATTGTTATACCCTTGCAGAAGGTTGTTGTTGNANGAAAAAN  
CNTTTTGTCTNNCGAGATATCTTGACCGANCCCCGGCANTTACTAGTCTTACNATACGCCTCATATTAAGTG  
CAAAAAAACGGATCTATATTAAGATCGGANACNATATCATAAAGCTGCCATAGGAACGATCGGNNGAA  
AATTAAGTTCTCTGTAAATGGGNNAATATNCTGTTTTAANCAGAGATNTCTTGACCAANCNCGGCGCTTACG  
AGCTNTACTATNCTCCTTATGTATAGGAAATATTCTATTAAGATCGGACTACTATGTNATATAGCTGCCAT  
AGGAACGATCGGTTCGAAATTAAGTTGTTGTATCGAAACTCCCGTTTTCAATATATCGACCAAACCTCGGCAT  
TTNTCAGTTTCGTGTATNATGCTNCTCATAACGACGATCGATNAAAAAATAGATCCATATTTAGATCGGAT  
CACTATATCATATAGCTGCCATAGGAACGATCGGTTCGAAAATGAAGTTGTTGTGTGCAAAACCTTTTTGCT  
CATTCAATATACACTGCATTTAAAGGCTCCTTTCATTTTCGCAAAATCTTAATTACATCGGACTACTATATA  
ATACATCTGCCATCGGAACGATCGGTTCGAAAACCTAGGTTTTTGATAAACCTTTTTTTTACCCTCGCAGAGG  
GTATTACAATTTTGTGCGGAATGTGTAACGCATGGAGGAGACATCTCGANCCCATAGAGTATGTATATN  
CTTGATCAGCATCAACAGCCGAGTGGATGGAGCACATGTNCGCCTGTCCGATNTGCATCTGTTGTCTANGC  
GAACTAGTCTCTCAGTTTTAAAGCATCTTATGAAATTTGCAGGTCCGTCTTCTGTACAGGCAGCACATA  
TGTCGNAACCGGCCGGATCGGGCCACTATATCATANAGCTGCCATTGGAACGATCGGTTCGAAAATTAAGT  
TTGGTTTTTCGTTTATCAAGATGTCTTGACCAAACCTCGGCATTTATNAGTTTTACTTTATTCCTCATATATAT  
GCGAGNTCCNACCAGAGATCAGACCACTATATCGTATTAAGCTGCCATAGGAACGATCGGTTCGAAAGNG  
ATGTTTNNGTATGAAANAACNTTTTGGACTCTTTACAANGCATCTTGNCCAGGCTCGGCACCTTATTAGGTT  
TACTTTACTCCTCATATATATGCGAAATCCTACTAAGATCGGACCGTATATCATTAGCTGCCATAGGAACG  
ATCGNTCGAAAATTAAGTTTTTGTACGAAAAACTCTTTATCTTTATCGAGATATCTTGACCGAACNTANCA  
TTTACTTCTTTACTTTATNCTTCATNTANATGCGAAAAAACGGNCCTATTAAGATCGCACTACTATATTATA  
AAGCTCCATAGNAAGNATCGGNCGAAAATTAAGTTNTTGTATGGNAACTTTAACATTACTGTTTTCCAC  
GTANTTCTTAGATCGAGCANAGCACTATAAGNNTTACAAAGGTTGGTCTACGAGGGTATTAAATNTTCGG  
CGTGCCGAAGATATCCTTTNTTTCTCGTTAAATATGATTTANNAACTTATACACNTGGACAACATTATGAT  
AGGAAATAAGAACATAT

>160\_rnd-5\_family-5230\_\_LTR\_\_Gypsy

TGACTATTATTATTTAAAAAAATTTTTTTTTTTNATGATCTGTTTGCAATATAACTAATACTCNCTAGTA  
CCAAAGACAATATAAACGCTAAGATGAATAACGCGANNCAGCAGAATGCTACTATGCAGNNTTGCCTCT  
CACAGCCGNGAGAGCGAANAATGCTAAAAATAAAATATTGNTTTCAGCTTCGGCTCTATGAGGGCCGTGC  
GAGCANNTATGTTTGTATGCGTGTGAATTATACATGCATAAGACAAGCATATNTGNATGTGTTGTTATCCA  
CTGCTCTGGCAAAGTCTCTGGCTNGCAAGGAANCAATNTTNTTAGTTTTCTAGNGCAGATCACGACCTACC  
CNAAATTTCTGTTGATATATGAATGCATTTTGTGTACTGAGGTTGGCTCCGTACAAAAAATTTGTATTTTTA  
AGTCGATGCAAATATTTACGTAATTTTCTATGTTTGAAATTATTAATTAATTAATTATTTTAAAGTNAT  
ACAAAATAAATTAAGGAAATAAAAGTGCAAATTNGTTGTTTTCAAAGATACATTTAATTAATTGTTTTTTT  
TATTTTATTATTTTTTTGTTTCGAATTATAAAGAACAAGCGCTCTTTTATTTCTTAATTGGAGAATAAAAAATA  
ATATTAATTTAATTTAAAGAAATTATGTAAATATTTGCATCGACTTAGAAATACATATTTTCTGCGGAGCC  
AACCTCAGTACACAAAATGCATTCATATATCAACACAAATTTGGGATAGGTCATGATCTGCGCTAGAAAA  
CTAACAAAATTAATTTCTTGCCAGCTAAAGCCAGAGCAGTGAATAACAACACATACGTACATACTTTAAA  
GTNTTATGCATGCATAATTCACGCATACAANCANAGGTGCNCGCACGCCATTGGCTGAGACAAGAACTTC

TCTCGAGCATACACTGTNCAAAAAANAAAAGTGAAATCAATCTATGTGTGCTATTTTCTTAACATAGTTATT  
GCGCAAGAAGCGCCTTGTGTAAAAATTATATAAGTTCTTAAANTTTTCTGTAAAATTAATCGTTAATATCT  
AGGGTAATATATCATTTAAATAAAGCATGCATTTTCATGGATAAAGCACAAAGCACTTTGCGTCGATCGTAA  
GTNCTAAACTTTTTTCGCTCAATGTACTTCGAAAACGAAGCGACGCAGAGCACCATCGACCAGCTTTGCTG  
AAGGCAAGCCGCGACTTCGGCATTTCGTTTCGTCTGGTCTTTGGAGAACGAACAACCAGTCGGCAGGCATGC  
CGTACGAAGCCTCAAAGGCCAGATGAAAGGCCAGGCTAGAAATTTTTCGTCGCATTCAAATGTATGGGCG  
TTACTCATCTTAGTGTTTATATTGTCTTTGGTAGCACTAACTAATTTTTTATAAAATAAACTTAAAAATTTT  
TGTGTTTGAAGAAGAGTTTTGGCTAGAATATCCACTTACATGATTCAATTAACACAAAAAAATGTTCTTTA  
TAAATTGGTCACTCGCAGCTCCCGCGCTGCTGTCTTAATTGTTGTTGGTTGTTGCAGCTCCCGCGCTGCTG  
TCTTAATTGTTGTTGGTTGTTGCAGCTCCTGTGCTGCTGTTTTACTTGTTGTTGGTTGTGGAGTCCGACCAC  
TAGTTGGGATTAATA

>9\_rnd-6\_family-1345\_\_LINE\_\_I-Jockey

CTGAAGCTTCCATTGGTGTTTCGAAGTGAACGGACGTACTCGCGGAATAAAATCAAATATCGAAATTCGAG  
TGCACGCCTAAACGGACAATCGCGGCTTTTGCAAGCCGGGCACAAAGATTGCAACGCATCAAGTATTGTGA  
ACCAACAACAAACAGAAAAAAAACAATGACGTCAAAAATTAATAACAAACTACTTGCTGACAAAGCAA  
TTTTTTTTTAGTGAGCAAGTAGTCTTCGCTGTCTTGCTGACATGCACCCAGCCAGTGGCAATGCCAATAGAG  
CCACCATAACCAGAGAGTGCTGAGATCAGCAACGCGCCCAACAATGAGCAACAAGGGGTCGTCTCGAACTA  
ACGAGGTAGGCCAACTATATGCTGACGCCGCTACGCCGCCAAGCACCTCAATGCTTAACAGCCGCTTAGC  
AACAGCTGCCAATAAATTCTCCGCGCTGATGTCTGCAAGAAGTACTCCAGTTTCACCTTCCTACCCTTTAA  
TGGTCTCCGACGACCCGGCAGCAGTCCGCATGCTGGTGCAAGAGATATCGTCAAACCCGATTACAGGGCG  
AAAAAACGATAAGCGCAAAGTCTTAGACAGCAGGTCCCCACCTGCCGCGCGGCGAAAAACAGAACAAGAC  
TGACACCAGTCCAGTTCAAATACATACATCCAATAGATATGCTCTCTTGGCGCCACCCGAAAACGACGAA  
GACATGGAGACTGATGAATCTGAGGCCGAGCAGATAAGCTCAGCCCAAGAAGAGAACTTGCCTGCCNCA  
GCGACTCCTCAGGTTGAGGGCGGCAGCCAGCCCAACGCCGTCGCCCATGCCAGCACCAGCTCCTCCGTGC  
CCGAAGAAAGGGCCAACAACAATGCCCCCACTGGAGGAAAGAAGCACCCCCATCGTCCTAAATGACATG  
ATGACATCAACGACGTGTGGCTCATACTATCTGAAGTAGTGGACCTGGAACCTGACCATCAAGTCCAACC  
TAGGTCGGACTATGCGACTCCTAGCCAATGATGTGCCACATACAGGGCCATCATAAAGAACTGGAAGA  
ACAAAAAATCCAATTCTATTCATACACAGCTGCAGGAGGAGAAGCCCTACCGCATAGTCATCAAGGCCTTC  
ACCACTCCACACTCAACCGAGAGCTCATCGACGACCTGCGGAGCCAGGGCCATACCGCTCTCCATGTGCA  
CAATCCGAACAGCAAAGCCACCAAGGAGCCCATGAACATCCACTTCATTAAGTGAAGCCGGCGGCCAAC  
AACAAGGAGGCTCTTACCATCAGGAAGCTGTGCAAGCAGGTGGTCAAGGTGGAGACTGCACGACTCAGTT  
CCGGNAACGTGCGCCCACTGCGGTGGTAACCACCCTGCCAACTATAAAGGCTGCGAGTGGTTCACCGAAT  
ATACAAAGCGTGCGGGAGCCCCAAAGCCCGCCAAAACGAAAGATCTAGCTGCATTACAGCAAAGAGAACA  
ACGCACCCAGCGCTAGCCAGCGAGAAGGACCAGCGCAAGCTAGGCTACATAGATTGCTGAGGGAACAGC  
AACAGGAGAGGCTGACTGCGCAAGAACAGCAACAGCAGACATCTGGAAACGGGGAAGGACNTTCCTCTG  
CCATCAAGGACATGAGCCGAGCTATCGAGAGAATGGC

>Ref\_dvir\_299

ATTAAAAAAAATTAATTCATCGACCTGCTGGGCATTTCTGTTCGCCTGGTATTTTCAGGGAAATTTTAGCT  
AAAATTTGGGCAACCCAGCCGGCGACGAGGGCGCCCTTTTGGGTATGCAATGAAATTTTTTTGGCACGTA  
AAAATATTTTTTGTGACCTTCTGGGCATTTCTGTTCGCCTGGTATTTTGGCAGATTTTTAGAAAAATCTCG  
GCAGCCAGCGGCTGCCAAAGACGCACCGTGCAGGTATGAAATGAAGTTCTAAAGTTTAAATAAAAAAAC  
AGACTTCTTTTTAAATAATTGTTATTTATGTTAAAATTTAAAAAATGGTTGTTTTTATGCTAATTTTCTTAAT  
TATTTCTCTTAAATTAACAAATCGAGCATAAATTATAATTTTAGCTTATTTAACTTAAATAACTATAT  
CTGGCTTAATTTAAGTCCGATCCTGGAAAAATTTGCTTTGTTCAGTCGTGGAGGTCCTTAGAGCTCATTGTA  
GTCCTTAATTTGTTCAGTCTGAAAAGATAAAAAACACATTTAAATTAAAAAAAGAAAAAAAATATAAAGG  
AAGAAAAAAGGCCATAACTCGGCCATATCCTTGCAGATTTTCAAAGGACATGGTGCCTTAGGATCGTATA  
GACCCCTGCATCGATCTGCATCAAAAAAATATGGGGTCATCTAAGAATCCTAGGACTTGATTTTTTACTT  
GTGAAATTTTTGTGCGGAGCGCACGGAAATGGCCCGAAAACACAAATCCTTGAATATCTCCAAAACCTAC  
AAGGACGATCTTAATGAACTTTGGGGCAGTTGGGTAGTCCTGGTCAATTACAATTTTTTTGACACAGGACT  
CGTCAGGATACGCAAGGAATATGGCCGAGTTATGGCCTATTTTCTGTTTACAAAATTGTCCTTAAACTTT  
GCTGTTTGAAGGACTTTCGTCCTTTGGGTTGTATATCTTAAATGGGAGGACGAGGACTATCTACTGGCCA  
AAGGACATCCCGATAGTCTTCAAATGGCCAAGTTAGTCCCGAATTTTTTCGATTTTTGCCAATTTTGCGAC  
TAACCCCTAGGAAAAAATTTTGGTGAAATTTTTTGTGCAATCCTGGAAATCCTTGAATGCCAATCGATAGT  
CCTGCTCCCCACGAGTTCAAAAAGGTATATCCTTCCGATATCCTTAAGGATTTGGCCGAGTTATGGCTATT

AAAAAAATGTCCTTTTTAGAAAAATTAGCCATATCTCGGAAAACGACAAGGACGATTTTGATGTCCTTTGGC  
CAGTTTATAGTCCTTGTCCATACGATTTGTTTGACACAGGACTTGTGAGGATCTGCAAGGATACGGCCGAG  
TTATGGCTTTGTTAATTTACAAAAGAATTGTACTCATATCTTGGCTGTCTGAAGGACTTTCGTCCTTTTCAT  
TATATATTCTGAATTGGGAGGATAAAGGACTATCGGTTGGCCAAAGGACATCATGATTCCGCAAGGATACG  
GCCGATCTACAGCCTTTTATCTTTACAGACAAAAATCTCTTTTACTCAGCTCCTTGAAGGATTTTCGTCCTT  
TTTATAACATATTCTATATTTGCAAGACTAGGACTTAATGTTTTCCAAAGTATTTTCAGGATTGTGCTTGAAA  
TGGCCAA

>9\_rnd-1\_family-186\_\_Unknown

ACCACTAACCACAAACATATAGACTGGACATGAGTACCAGAAGTAGNCACAAAAATGTATCGGAGGCAT  
CTGGTCCAAACTCGCGAGTAAGGGAGTAAGATATACATATGATGTATTTTTGAACCGCTTACTCTACAGG  
AAAGTGCTTGGCGCACTCTCTTCCATATGATTTGTGCGATAGAACGGCAACGCTGTAACTTTTATCTCGC  
TCGCACTTACTCTCAGCTCTCAATGCTCTCTCTATGTTTAGGGATCGTTTCAATGTGTGTGTGTGTGTATTT  
GTCCGACNAGCAAACTGCGCACAAATTCAATTTTTCCCAAATGCTGAGGCATTTCTACCTTTTGAAGGC  
ACGGGTAATATGAAATAGAGAAAGGGTTTGCCACGTCGATGCGAAATCTTGCATTTTAGCTCGCTATCGT  
TGGTAAGGGTACCCAAGCGTTGCCATGTGTGCATTTAGAATATTTTGGACTCGCTATTCACGCATACTTGC  
ATATTTTGTGTATGAATAGAAGCATTTATGCGCTTGTGTGCCTGTTGCTTGCCTGCCTGCCTGTCCCCGATG  
CAAATTTAACAAGATTTTAGGATTTCTGATTTTGGACCTCTACACACAGACACACACATACAAATGTCTGT  
GAATGGGCTGATCATGGGCGCAAAAGAAAAATACATTATTGGCACGCGTCTGACGCGCGCCCTTCTTTTAA  
TGATTNTGAATGAAATTTGAGTAAAAATAAAAAATCTTTAAAATATTTAAAATATACACCAAATTAAAAAAA  
AGGAGCGATTATATATTTATAGTTTTAATAATTTTGGTGATCAGTCACTTGACCTCCATATGCAGGTGCGT  
TGCCAAAAGTTGACCCATTCGACCCAACGAGCTGCTGCAGGTAATAAGGGGTCAACATTCATTCATCAAA  
ATCNTAAAAAAGAAGGGCGCGCGTCAGACGCGTGCCAATAATGATATTTTCTTTTGCGCCCATGATCAGC  
CCATTCACAGACATTTGTATGTGTGTGTCTGTGTGTAGAGGTCCAAAATCAGAAATCCTAAAATCTTGTTA  
AATTTGCATCGGGGACAGGCAGGCAGGCAAGCAACAGGCACACAAGCGCATAAATGCTTCTATTTCATACA  
CAAAATATGCAAGTATGCGTGAATAGCGAGTCCAAAATATTTTAAATGCACACATGGCAACGCTTGGGTA  
CCCTTACCAACGATAGCGAGCTAAAATGCAAGAATTTTCGCATCGACGTGGCAAACCTTTTCTCTATTTTCAT  
ATTAGCCGTGCCTTCAAAGGGTAGAAATGCCTCAGCATTTGGGAAAAATTGAATTTGTGCGCAGTTTTGC  
TCGTGCGACAAATACACACACACACACNTAAACGATCCCTAAACATAGAGAGAGCATTGAGAGCTGAGA  
GTAAGTGCGAGCGAGATAAAAGTTAACAGCGTTGCCGTTCTATCGCACAAATCATATGGAAGAGAGTGCG  
CCAAGCACTTTCCTGTAGAGTAAGCGGTTCAAAAATACATCATATGTATATCTTACTCCCTTACTCGCGAG  
TTTGACCAGATGCCTCCGATACTTTTTGTGNCAACGCTTCTTGTACGTGATGTCCAGTCTATATGTTGTTT  
GGTTAGTGGT

>9\_rnd-1\_family-102\_\_LTR\_\_Gypsy

AAATACATTATAAATACATTACAAATATAATAAATCTNAAAATCAAAAAATATTTTAAATATAAAAAATAAA  
TTTAAGTAAAATAACTCCACTTAGTTACGTTATTTTTCAAAGGAGGGAGATGTGTAGTATGTGCATATAT  
TGAGGGTACACTGTACCAATAAAGTAACATCGGTTAAGCATAAATANATCAGCAACACATTGTTGCAGTA  
CACAAACAAAACCNTTTCGAGTGAGCGTGTAATATGATCGCCCGCTTATGAGCTACGCTAAGTCAGCAGT  
CCCACGCTGACCACTCGTAGCACATATATATATATATATAATATATATATATATATATATATATACATACA  
TGCAAATATGTACATAAGACTCTCTCTCCCGATTATGCTGATAAGACAAAATATGTATGAAGCCGCTCCGC  
TGCTGGCGTAACCGGCAGCGCAGCTATGCGGTCTTAGCCATAAGAATATATTGAATAAAACATTCTAAAA  
CTAAAGTCAAACGGCACAGACGTGCCCGTGATTGAACTATTTGAATCTATTACATGGCGACCGTGACCT  
AAGGTCAAACAGACCTGGACATGGAAGGACAGCAGCAACGGCAGTAACAAAAACACACAACAACAAC  
CANACAAAAAACAACACTATGAAAAGTCTTACAAGTGATGACCAGCAGTCAACAAGTGTGAGAG  
GCAATCCGTCCCTTACGCCAGCGCGGGAGACTTTGAGATTGAAAGAAAAACAAAGTCTGAGTGAGTAG  
AGTGCGAGTAATGGGCAAACGCGGAGGCCTGAAAAACAAAAATAAATAAAAGAATAGCACACATTAAGT  
GGCTATTATACGAATACGCCGCCACATGGGCAACGGCACAAAAATTAACCTACCGAACTTGATTTTCT  
GAAAGCCTCCAGCAAAGAAAGCCAAATACCGCAACTCACTCAGCAAATATCAAAGTTATAAATGAAAAA  
CTAATGAAAAAACCACCATCTCCAAAGCCGTTGACGAAAAAACCCGACGTCTGCCCGAACGACTGCCCTG  
GACCACTATACGCTCCAGCATGCAAATTCGCATGCTTGGGACCAAGACCAGTGCGAAGACCGACACCGG  
CCTCGCCTGAGCCAATAGGCCACGGACATCAGAAGCAGTGAAGGCAACAGCGCAAGGGGCACTCCGCGA  
CTTTCGCCTACGAAGGAGCGTCAGCGTAGCCAAACCGGCGATTATAAATTATGCGGAACCATCTCCGCTC  
AATTAGAAGTATAGCCCGTAAAGCTATACAAACCAATAGGTAGAAAAATTTGTAAACGTAAATGCAAAGC  
AATGCAATAGTAAATTTACTGAAGATACAAACAAATAGTTATAAATACACTCTAAAAATATATACGCCCA  
AAATGGCAATAGTAGACGTTAAGTCAGTGGACTCCACTGCTAATGTCATTAATAAAGTAGAGTCAAATAA

TAATGACTTAGAACTAATACACACACTGTTAATAATAATTGTTGTTATTATGTGCGCAAATNGTTCTTATA  
AACTATATAAATTACATAACAAATGTTTAAAAAAGAAATATATGAGCCAGGNAAATGACCTAGACAAAN  
TTTAATTTAAA

>9\_rnd-1\_family-443\_\_LTR\_\_Pao  
ACAACAAATGNCTNATATTTTTGGATACGATTTCTCAACTATCTGAAATTCCTCACATGACAAAACCTTCG  
AACTTAAGTCNTAGNCACCATATCGGCATTATATTCGTCTCTGCAGTCTCTAGGCGATGACAAGGATATTG  
TAAGTGCAATGTTAATGCACNTGGCAATGTCAANAGTAGACCAGGCAACAAAATCTCGATTTCGAGGAACA  
GCTTGACTATGATAGTTTGCCATCTTGGTCAGATTGCGCTGCTAAATTGAATCGGCGCTATCAAGATTTAG  
CTGCCGAAGAGTCAACTAGGGGGCGAAACGAAACCAAGGCACGAGGCTAAAAAGGGACATANCAGGTCAT  
CGTTTTTCGTGTTCTAAGGGTGATCAGAAAACAGGTACCAAATGCAGCTATTGTTTCAGTCGCTGATAGTCTC  
GCAAACCTGTTTAGCGCTCTACCTGTTTATCAACGCTTTGGGTTTGTGAAGCAACACAACCTTGTGCATCAAC  
TGTTTAAAAACAGGAGCATGCAGTAAAAAATNTGGAGGATCGAAATGCCGNGCGTGTTCAAAGCCACAC  
CACACTGTACTTCACAGGTATGAGAGCGAGAATTTCGCAAACGCAAGCATCNAGTTCCGACAGCTTCTCTC  
CACAGCAACAGGCTTATGTAAGTCATGTCCTTAGTGCCGAACAAGTAATCCTAGCCACAGCTGTAGCAAA  
GTTAAAAGATAGGTTAGGGCATTCTAGCCCGCGAGAGCGCTTTTAGATTCCGGATCGCAAATAAACTTT  
ATATCAGAGGACTTAGCAAAACGCTTACGTCTACGTCTGATGATGCGTCATTGAAAATTGTCNCAGTGG  
GAGCCACTGCTTCGAGCATCAAAAACAAAGTCTACACATCGGCTCAACCGCGATTGACTTTTCATACTTTT  
GGGGCTGATTTTTGGATTTTGAGTTCTACTTCTATATACCAACCTGATCAGAAGATTCACTTTTCACAGTGT  
ATACAGTTGTACAGAATAAATATCCAAATATTGAACTGGCCGACCCCGATTCCCCAAACCTGCCAGAG  
TAGACTTGCTTTTAGGTGCTGGAAAGCTTTTCGACCTCCTTTGTATTGGCCAAATAAACCTGTCTCCTGAAC  
ATCCGATTTCAGAAAACATTTTTAGGATGGGCCGTGTCGCAAGGCACATCATCGCAAGCACAAATTAGCAC  
TNTCGCAATTGATTTTGGGACTAAGAACAGACTCCACAGAAGTCGAAAGCTGCATATACAAGTTATTTGA  
TNTCTCAATTGCAGATGTTGATGTTGTATATTGAGTTTCTCGTCACAAGTGCTGAGATTGGTAAGGTTATAT  
TCCTTGTAGATTATATTCGGAAGCAACTAGCTTTCCAAATCACTGGCCTTGTGGCTCGGCAATGAAACAAT  
TAGTATAACGAATTGATGACGGAAAGTGCCGGAGCAGTATATTTAATGAAGTTCTTTTTAAAAGTTGGAT  
ATAAACTAACTAGAATTGAAACATAGAATTGGATCTGAGCATAACGCCAACACTGTCGTTTGCGACATA  
GGCAAGTGTGAGGTTACCGCTGCTGACCGCAGTGGCGGGGCACTGAACTCATGC

>160\_rnd-4\_family-304\_\_RC\_\_Helitron  
TCACACATATTGGTGCAAATCTGCATATATGTATGTGTCTGCCAAGCCAAGGGAAGTCTATGAACTTAAG  
AAGATTGCAACGTTCTGTTGCGCGTGTGACGTCACAGCCCAAGGCTTTTTACGCGCATCATTTTCGTATTTA  
AAATGATTACATATGCCANTCAATTATTTACTATAAAGGACCCTATTCATAAATTATTTAAATGTACCTAA  
TAAAGGTAGAAATATATACTAAACATCACAAGAAATAAAATTCTATTAACCGTGACGTCATAATATATGA  
TGTTGGCGCGCCGTGCGCGTAACCTTTGATCTGAATGCCATGGCCTGCTGGCATTCAAATTTTCTACCTA  
CTTGCGCCGAGACTCGGCTCTGCAACAACAACCTTAGTACCCAAATTGTGTGTTGTTGTTTCTACGCGCTGC  
CTTGTAGGAACGACAGAGAAACCAGCAACGAACACAGTGGCATTATCTGTCCCTTTTCTTTGCACCGAGTT  
TCCTATGTCCTCGATCTCGCAAACCTTGNCGATCAAAACGGGCGACGAAGAAAAAATTGGGTTTCGTGC  
GCACTGTTGTTGTTTTGCAGGTGATTTGTTGTTGCTTCCTATGGTAAACGAGCTTTTTATACCCTGAACCCA  
TTAAAAATGGGTATAAGGGTATATTGTATTTGTGCAAAATCCAAATGTATGTAACAGGCAGAAGGAAGCA  
TCTCCGACCCCATAAAGTATATATATTCTTGATCAGCACCAATAGCCGAGTCGATCTAGCCATGTCCGTCC  
GTCCGTNCGTATGNACGCAAGGATCTCAGAACCTATAAGAGCTAGACTCGAAATTTTAGATGTAGGTGCT  
CCTAGTTCCCGCGCAGATCGAGTTTGTTTCCGATAATCGATAACTTACTCCGTTTCCAAGCAATCGATAAA  
AATCGATATCGACATCCTGTTTTTTTGGCNAATTGGGTAAATAATAAGAGCTAGAGCCACCAACATGAT  
ATGTTGCTTCTAGAATATTATATATATGTCAAGTATCTTTCATTTTATACCTATCGCCACCTCCCCGCTACC  
ACCGCAGAGCTATAAATCAAGTTAATAACCCAACCTTTTATTGCCAACCAATTTAAACCACAATTTAAATGC  
AATTGACTTTTTTCAGAATACACAAATATTCTATGGTACAATAAGATATACTGTAGAAAATTTCATAAAGAT  
CGGTTAAGAAAAACCAAAGTTATATGCAACTGCGCAATTGAATGGGGCAGCAGCTTTAAGAATTTCTGTA  
TACATGTACACACACACATTCATGCGCGTCTGCTTCGCATTCTAACAGCATGGTAATTGCGATCTTTTTTTT  
GTAATGTTATTTTAGTTTCTTTTTTATCATAAGTACTTAATTGTTGGTGTGGCTGCTGAGTAGAGGCGATAG  
CAAGTGGTGCGGTCNGTCGCGAGTTCGAGCCCTACCGGGGAAAGTATTTTTTTTATACCCTGAACCCATTA  
AAAATGGGTATAAGGGTATATTGTATTTGTGCAAAATCCAAATGTATGTAACAGGCAGAAGGAAGCATCT  
CCGACCGTCCGTCCGTCCGTACGTATGAACGC

>Ref\_dvir\_833  
ATTAAAAAAGTGTAATTTTTTAAAACTAGAAATCCAGTTTTTGGGTCATATTATAGAATTTAAAAAGTTG  
TACCCGATACCGCAAAAAATTGAAGCCGGTTCAAAATTTGACACAAAACAGACACTAAAGCAGCTTGAA

AGTTTTTTAGGCCTTACTGGTTATTTCCGAAAATGTATCCAGAATTATGCCATTATTTCAAGGCCCTTATCA  
GATTTGACAAAATGCAACACAAAATTTATGATTGGTCCTTAAGAAGAAAGCGCTATCGAAACCCTGACCC  
GGTATTAGCTATATACAATCAAAAATACGAGACAGAAGTACATACTGATGCATCAATAGACGGTTTTGGA  
GCTGTGCTCATGCAAAAGTCACCAGACGATCGACAGTTGCATCCAGTATACTTCATGATTAAGAAAACGA  
CGGGCGCACAGCGAAAATATTCAAGTTATGAGCTTGAGATAATAGATGTCATCGAAGCGTTAGACAAGTT  
TCGAGTTTACATTTAAGCATCCCATTTGAGTTGATCAATGACTGCAATGCATTTACAAAGACGATAGAAAA  
GCAGAATCTGTGCACAAGGGTGGCCCGTTATTTTACAAGAGTTTAACTATGAAGTCGAGCACCAGATCCGG  
TTCACGCATGAAACATGTAGATGCGCTCTCGAGATATCCAATAATGCCAATAAATGATGAAAGCATATCG  
ATTTCCGGATAAGGAATGCACAAAAACAAGATGACCAATTGAAATCAATCATAAAAAATTATCGATGACGA  
AAAGAAGAATTATGAAGATTATTTTCATAAAGGCAGGCATTCTTTACAAGCTAGTCGACGATGTTGAACTC  
ATAGTTGTTCCAAGGGATATGCAAAGACAAAATATCAGTAAAGCCCAAAAAGACAAAAGAGTTGATATC  
CAAAGAGTATTTTATACCGAACGTTGAAGAAAAAATTAAGAAATTAATGACTGCTGTATACCCTGCATT  
TTTACAAATCGTAAGCGAGGGAAACAAGAAGGTTTGTTACATCCATTGCAAATAAGATGTCCCATTTGCAA  
ACATATCACATTGATTTTTTTGGGTCTGGCTATAATCGACACACAAGGATTATAAACACATATTAGCTGTAAT  
CGATGCTTTTACGGAGTTTTGTTGGCTTTATCCACAAAGTAGACTACAGCAAATGAAGTCATTTTCGAAAT  
TGCCTGCCAGAGCGTAGTATTTGGAAATCCAGCCTGTATAATTTCTGACAGCGGCTCAGCATTACAGGT  
CCGAAATACTGTGTCGAAGAAAATATCAAACCTCATCAAGTCGACTACTGGAACCTACCCCGAGTGAATGGT  
CAAGTGGAACGACTTAATGCAGTTATTATATCTGTACTGTCAAACTAAGTATCGAAGACCCAACGAAAT  
GGTATAAACCTGTAGAAAAAGTGCAAAGCGCTATAAACTAGACGTATACCAGGAGCATTGACACCACTCC  
TTTTGATGTTTTGATGGGAGTCAAGATGCGAACTAAAGATGATCATCAACTGCATGAAATGTTAAGAAAA  
GAGTCCGCAGTTGCATTCAACGAAGTCCGCAACCAACTA

>9\_rnd-5\_family-12145\_\_LINE\_\_R1

AACGAGATAGGCAGAGTCTGCTATCCAGTGCGAAGATGGTCTCGACTTCGCGAAATCCAGTAGAGTTAAG  
CTAGAGCTCCACTTATCAACTGCTAAAATCACTGCAACAACCTGCAGGAGCCAATCAAACCAAAACAGCCA  
GAGAGATACGAGCCGACGTGGCACAATCCGAAGAGAGTTGGGTCCACAAGGTTACACCGACTGGGGAA  
GTGCCGGGACGAACCCGCAAGGTTACACGCTGCTAGACGACTTCGAAGCCCTTAATGTAACACTGCTGAA  
CACCGGGACCGAGCACACCTTCACCAAGGCAGGACGCGGCTCAATTATTGACCCTGACGTTTTGCCAGCC  
CCTCAATAGCAAGACGGGCCACATGGGAGGTGTCCAGCTGTANACGCATAGCGACCACCAGGCCATTGT  
CAGCAATACTGATGGTGGACAACCTAAGCCCGACGGGCAGAACACACCACATCGCTTGGGACCCTGAGGG  
GCTCTTAGCGNTTTTTGAACCCACCGCAATCGCTGGAAACGCAGAACAGCTCGCTAACGNCCTAACACGG  
GANATGCAACGAGCCTGCGATGCAGCGATGGCGAGGAAAAAGAAAGGAGGTAACAAACACAAGCCAGT  
CCGATGGTGGAATGGCGAAATAGAGGATGCGCGTAATAGGTGCCACACAGCAAGACGCATATACCAGCG  
CGCAGAAGGCGAGCGCGACGGGAAACAGCAAACCTGGCCCTGGAGCACGAAGCCGAAGAAGCTCGCGC  
AGCCTACCACTCCTGGCGAGCTATGCTCACCAAGGCTATCAAGCGAAGCAAGCGGCAATGCTGGACGCAA  
CTCTGCGACGAAGCCGACACCCAGCCCTTGGACAAGCCTACAAAACGGTAATGGGCAAACCTCGCAAGAG  
GACCCGTACCGACCTGCCAGAGCATCTAAAGCAGATAGTGGAGACACTGTTCCCGCGCCAGATAGAGCT  
ACGCCACAACCCTCCAGCCGTAGGCACGTCGGTGGTGCCTCCCATCGACACAGAAGACATAAGTGCCGCG  
CTAAAGCGCATTAAATCAAACAAAGCCAGGGCCCGACGGCATCCCCAATGCAGTGCTGAAGACCATCGCT  
AGCGCCACGCAGACACAGTCGTAATGTGTTCAACCGATGCATTGCNGAGAGAACCTTTCCAACGTGCT  
GGAAGTTGCAGAGACTGGTCCTTATCCCTAAAGCCGGAAGGCGAGGACCCCTCTGCCTACAGGCCACTCT  
GCATGCTGGACTCCACGGGCAAGCTNTTCGAGCGCATCATCTGCGATCGNCTGGAGAAGGAGATCGCTGA  
TCGCTACGGACTCTCGGACCAGCAGTTCGGCTTCCGTAAACACAGGAGCACTGTGCGACGCTATCAAGTTG  
GTAGCGGACACGGCACGGAAGGCCATANGAGGCACGCGATGNCGCGGCGGATCCAAAAAGTATTGCCTT  
GTGACNACGCTNCTGGCACANACAAGGCTNCNAACTCGGCAAGCTGGCCAAACNTACTCCTGGCACTCTC  
CAGGCTGCGGGTCTCCGTGTACNTCATCAGTCTTGTTGCCGGACGACTCCA

>Ref\_dvir\_1036

TGGATTCTGGTTTGTAAAAAATGGCACTTTTTAAATTCAGCTCAAGCCCGTACTCTTTACAGGTATTCATA  
ACTTCCATCAGATTTTCCAATGCCTCCTTTTCGTCTTTAGTCGGTATGATTACGTCGTCTACGTAGGGTAGT  
GCAATATTTCTACGAGGTAGCGGTCTAAAATTGCATTTATGTGCCGTTGGAATATTCCAGGTGAATTTGAT  
AAACCAAAAGGCACATTGAGGAACTGATATTGTCCGCTGTGCGTAACAAATGAAGTGTACTTCTTACTGT  
CCTCGGCTACTGGCACATGGAAGAAGCCATTCTTCAAGTCGATTGTGCTAAATATCGAAGCCTCTTGCAGG  
CGATCGATCTGATCATCTATTAGTGGCAATGGGAAATGATCTTTTATGATTACCTTATTTATTCTTGTAA  
TCGATACAGAGTCGTGATGTACCATCAGTCTTTTTTACGAGAACCCTCGACTCGTAAACTCCGAATCTGA  
CTCTTCGATAATACCATTTTTTAGCCATTCATCAACCTGCGTTTCAATGATGCGTGCCTCTGTAAATGCAA

TCTTCTTTGCCACGAAAAAATTTGAGTTTCATCTTTTAAAAATTATTTTCATCTCAACATTTGTTGTTTTAA  
ATTTCCGGCTTATAGTTCTGAACCATCTCAAGTACTTTGTTTTTTGTAACATCACCAACCTGAGTGTTTAT  
ATCGACTTGATCATTATCAATTACCGCATCAATTTTCATTATATTACTTTTCGTCATCTCGTTTTCTTCATAT  
GTCTTTTCGTACGCTTACACGCGATTAAATGATATTTCCGCATACAAACAAAGTTCTTCTCCAATTATTAGTT  
TAACGTCCATACAACCTTTGCGTTACCACGTAAAAATTCAAAACATATTCATTTTTATCAATCTGAACCGTA  
TAATTAACCTGCCAATCGGCTTTATTTTATTCGCGTTACGACCAAAACCAATCAAATACACGTTACAGTC  
TTTTAATTTTGAAGGGAAAGTTCCTTATAAAGATCTTCACGTAAAACATTAAACTTGCTACCGGTATCAA  
ACAATGCTAAGCACTTCTTGTTTTTGAATAAACTTCTTTTGACGTTAGCGCAGTTTTGTTCTTTACAACAC  
GAATATTTGATTTGACTTCATTTTGATTTTCACATTTTTCCTTACAATATTTTCGATATGTGTCCGAATTGGTT  
ACAATTAACACATTTTCTTCTTTTTTGTTTATTCATGCAATTGTTGGCTAAATGCCCCCTTTTCTCCACAATA  
AAACAATTGATTTCTTTTTTTTTCCCTGCGCGTACCCTGTGCATCATTTGCACCTTTTTCTCTTTGTCAATTT  
TATCACTTTTCTTATTTTTTCCACTCAATTTTTCATAGTCCTTTAATTTGTTTTTAAACTCGTTCATGTTTATT  
GCACCATATAAAATCGATTTGTTATTGGAAAAATCATCTATACCATCGATCACGTATTGCATGAGTGCTTC  
GTCCTCCACATTTCCACGAAATGCAATGTCTTTCATACGAAAGAAATATCGTAGGGCGCTCCCCCAAT

>160\_rnd-5\_family-1543\_\_LTR\_\_Gypsy

ATAGTGACATATTCACAACAACAGCATTTTGAACCACTGTTATTCATAAGCTACATTGCATGGCATAAACC  
ATTGTGTGTTTACAACTGAATAATCATAACAATAGCATGCCTTCTGCATCCGAATTCAAATAACGCTAAC  
AGCAGCAAAAATCCTAAGAGCAGAATGCCTTCTGCAGCCAAGCTCACATATTGTCAACAATCATTATATAA  
ACAAAACTGATCAACAGAAAGGCGCTAGCATAAACAAGCTGCAGCCGCTGTCCCTTTGCAAAAAGTCAC  
GTACTCCAATTATTATTTAGCTTTAAATATAGCGTAAGCCAATTTTCGTNCTCAGTCTTANTCCAGATATTC  
AACATAATAAACCGATACAGATTCACGGTCGGGAAATATAGTCTTTTTATTTCCAAACTTATAACTACGTT  
ATTGGCGCAGCCGGTAGGATAGCGTACATTTTGTGAAACGAAATAAATTAAAGTTCGTGAGTGATACGAT  
CAATTAAGAGAGGCTTATCCATACAACCTGGTGTCTTCTCCGATCAACAAGTGTAATTGTGCACAGTATTA  
CAACTAAATCGAATATATTTCAACTCCGAAATTCGCTATCCGCAAAAGAACTTAACGTGTNNAAACAATT  
CAAGCAACGTATAAATCCAATTCGGTCGTTGCAACAAAGTGAATTTTCGTGACACAAACAAAAACCTAAA  
ATNATTAAAAAATGGAGCAACCAGAAGGCTCTCATGTTGCTGCACTTCCAGCAATGAATAAATTAAACGA  
CCAAAATTTAAACCAATTGCTTCAACAAATACGGAACGTGCCAGCCTTTGAGGGAGACCCTATAACCCTG  
GGTCCATTTATCAGAAGGATGGATTACCTGCTTCAACTGTACTCTACTCACAATGAACGACAACAATGCAT  
CATATTCGGGGCGATTGAGCTCCAGATATCCGGAGATGCCCAGAAGGTTCTAGAAATGCTGCAAATCAAC  
AACTGGTCCCAACTCAGGGAAGCCTTAATCTCCGAATACAAGACGCAAACACCCGTGGAAGAACTACTGC  
GAAGACTATATAATACCAATTATCAAGGTAATTTACGTAAATTTTGTAGTGAGGTAGAGGCTAAGATAAT  
AATTATAACTGACAAGTTAGAATTAGAAGGGAATTTAGATAATTCCAGATTGTACACAAACGCTATGCAT  
AACACTGTAAAAAACTTGATAAATAAAAAATTACCAGATAGACTCTTTATGTCACTCGCAAGACACGATA  
TATCCACTATTTCCAAATTAACAACAAGTAGCTCAAATGGAGGGCTACTATGAGGAAAATTATTATAACAA  
TAATAAAAAACAAAATACTAACAATGCTATAAATTATACAGGCAATACTAAACCTCAATTTACCCCAAGT  
TACATAACTAACAATAATCAAAGCCACAATTTTTCACATCACCTCCGAACAACCAAACTTATTTTAACCA  
AAATAAGCAACTAGCTCAAGAATTCAAACAGAATTTACAACAAGCACAAATAAATAACCCCATAAATCA  
AAATATTTCTCAAGGTAGATATATA

>160\_rnd-1\_family-30\_\_RC\_\_Helitron

TTTTTATACCCTTGCAGAGGGTATTATAATTTTGTCTGTGAAATGTGTAAACGCATAGAAGGAGACATCTCCG  
ACCCCATAAAGTATATATATTCTTAATCAGCATCAACAGCCGAGTCGATATAGCCATGTCCGTCTGTCCGT  
CTGTCTGTTTCTATGCGAACTAGTCCCTCAGTTTTAAAGCTATCTTAATGAACTTTGCAGAACTCCCTCTT  
TCTGTTGCACGCAGCACATATGTGAAAACAGCTGGATCGGACCACTATATCATATAGCTGCCATAGGAA  
CGATCGGTCGAAAATTAAGTTTTTGTATGAAAAAACATTTTGTNTNTCAAGATATCTTGACCAAACCTCGGC  
ATTTATTAGTTTTACTTTACTCCTCATATATATGCAAAATCCTATTAAGATCGGACCACTATATCATATAGC  
TGCCATAGGAACGATCGGTGCAAAATTAAGTTTTTGTATGAAAAAACATTTTGTNTTCAAGATATCTTGA  
CCAAACTCGGCATTTATTAGTTTTACTTTACTCCTCATATATATGCAAAATCCTATTAAGATCGGACCACTA  
TATCCATATAGCTGCCATAGGAACGATCGGTGCAAAATTAAGTTTTTGTATGAAAAAACATTTTGTNTTTC  
AAGATATCTTGACCAAACCTCGGCATTTATTAGTTTTACTNTACTCCTCATATATATGCAAAATCCTATTAA  
GATCGGACCACTATATCATATAGCTGCCATAGGAACGATCGGTGCAAAATTAAGTTTTTGTATGAAAAAA  
CATTTTGTNTNTCAAGATATCTTGACCAAACCTCGGCATTTATTAGTTTTACTNTACTCCTCATATATATGCA  
AAATCCTATTAAGATCGGACCACTATATCATATAGCTGCCATAGGAACGATCGGTGCAAAATTAAGTTTTT  
GTATGAAAAAACATTTTGTNTTCAAGATATCTTGACCAAACCTCGGCATTTATTAGTTTTACTNTGCTCCTC  
ATATATATGCAAAATCCTATTAAGATCGGACCACTATATCATATAGCTGCCATAGGAACGATCGGTGCAAA

AATTAAGTTTTTGTATGAAAAAACATTTTGTATTATCAAGATATCTTGACCAAACCTCGGCATTTACTATTTTC  
CCGGTACTTCTTAGATANGGGCAAAGCACTATGAGCATTATGAAAAGGTTGTCGGTGCTGCAAGGGTATT  
AGATCTTCGGCGTGCCGAAGATAGCCCTTCTTTCTCGTTTGAAAAAACATTTTGTTCATAGATATCTTGA  
CCAAACTCGGCATTTATTAGTTTTACTNTACTCCTCATATATATGCAAAATCCTATTAAGATCGGACCACT  
ATATCATATAGCTGCCATAGGAACGATCGGTGCAAAATTAAGTTTTTGTATGAAAAAACATTTTGTATTATC  
AAGATATCTTGACCAAACCTCGGCATTTATTAGTTTCACTGTACTCCTCATATATGTGCAAAATNCTATGAG  
CATCATGAAAAGGTTGGGTCTGCAAGGGTATTAGATCTTTGGCGTGCCGAAGATAGCCCTTCTTTCTCGTT  
TCTTT

>160\_rnd-6\_family-866\_\_Unknown

TGGGCAAAGCCCACTGATTCCATTGATTTCTTGACTTATAAAAGTGNATAATGGAGTTTGTTAAAATATCG  
TATATTTTCGTGGTATTGTATATATTTTCAAAAACCTTTACAATTTTCNACAGCTCTTGGGNCGTATAAGCAT  
TTTGACTGTTTTTCAAAGAGNCGATGCTATCCCAAAATATGGCATCNNTTCTTTNCACCTCATGATCATAGT  
ATTTGCCGTTTTAAATTGCTAAAAAGAAAGCAATTAATTTCAATAATTCTTTTTTTTTTCTGCGGAATTCAT  
ACCTNCCTGCACAGNCACTGTACCACCAGCCACCACAAATGNNTGCTTGCGCAGTTGCCATNACCCCGNN  
CATCATTATCACGATCGTATGTGCTGAATTTTCATGTTTNTGTGGTAACTCAANAAATCGCCTGTTGCATTG  
CCCTCAGCCTTACCCAAGGCGATCAGTCTGTATTGATCGTCCTCGCCAGCGATGGCAAATTGTTTCATATCT  
GTAGTATTCGATGATACCATCAAATCCTTCCATATGTATGTAGAGCTCATGGGGCTGGGCGCTCGTCAAGC  
GATGAATCTTCTCNAGTCCTAAGAAAAAGTCACCATCAAAGTCGCCAAAGCCGTCGCGGTATGCGGCCCA  
ATTCCTATNGAAATCCTCCTTACCATCGATTGCTGTTGGATAACCGTCCAGCCAGGACCTGCCGTCGCAC  
TGTCGCANAGTACATCGAACGGATCTTGATCCGGTTTAATCTTATGAATACCCGGANCATCTCCAAAGTGA  
GTGCAATCACTGNAAACGGGCTTCTCTTCGCAGCTTTTTAATTTCTTGGCACAAATTGTTGATTTTCGTTCTT  
GATTTTCGGATATTTGTTGGTCCTTTTGATCGATTGNCTTCTTTTGTTTCTCCAGCTGCTCTTCATAGTCCTGG  
ATTTTCAAGGNATTGGAANTGAGTTTACCCATTTCTCTTTTATTGATAAAACGTTCTTCGTTAGCTCTTTG  
ANCGCCTCGATGANGAATTCATTACGTTGGTTTCACTTTTCTGAGTTGCTTGATTTCTCTGTCTTTGCGT  
TCAACTNTATTGTTATTGTTTTCAATTTCTCCTTCATCTGATGTATATACTTTAATAATGGTCTCACAGCCT  
TATAGGTGTGCTCTCCGCATTGCTCCTCTGCTATTCTGGTTGCCGNACAAGACTAATAAGAGAGTACGATT  
TATTTTCTGCAGTGCACACAGACATTGATAAATAATTTCTTTTACCTCATTTTCGTTAGNCTCTGCTTCAGC  
TATGATCAGTATNAGGCTTATATATAGAATATATAGAAACANAACACATTTTCATTTTGCACNTGATTNTG  
GAATGAAATCGCGAATCTCAACTGNACTCAGCACGCNCGAAAATAGACTGAAATATGGAAATNAATTGG  
AAGCTCGGGTNCCCAAATTTCCGAAACTNATAAGCGATNAGCAGTAGGTCAGGAACTCAATATAAATAA  
ACANAAGGCATGGATCAGGCTTTAAGTGAGCTTCATTGAACAGCTGANAGATTGCACATA

>Ref\_dvir\_1003

CAATATAATGGCATTTTTTTTACTTCTGGATGGTTAGTACGAATTTCTTTTGATGGCCCCTTGGATTAAAGAA  
CGGCACCCTCTGTGTTTCAAAGAGCTGTATGAAAAGCACTTGACAGTCTTGCTCATTTCGTTTGTAATCGTT  
TATATGGACGATATATTAATTGTTTCAGAAACGAAGGAAGAAGCGTATGAGCGGTTGCAACTTGTATGAG  
ACGTTCTAAGAAAGGTTTCTCATTTAAATTTTCGAAGTGCTTTTTTCTTGAGATCTACATTTTCGCTACCGTGG  
CTATGAGATAAAAGCGGGGGAGAGGCGATACGTCCAAATTTAAGCAAAATAAAATCGCTAGTGGCGTTG  
CCTCCACCGAAGTCAGTTGCTACTCTAAGACAGTTCATTGGGTAGTGTCATATTTTCGTCATTCATTCAT  
TTTCTCACATCTGAAAAGAATAGTTTTGATTGGCAGCCACAGCATGAAGAAATTCGCAGTAAAATCAGCA  
GTGTATTAACAAACAAGCCCGTTTTAATAATTTTTGAACCCCGAGTTCCGATAGAAGTGCATACCGACGCC  
AGCTCTATCGGGTATGGTGCTATCCTTTTGCACCGCATAAACACTAAGCCTCATGTGGTTAAATACTATAG  
TAGAGCAACTAGCTCCTGTGAGTCCAGGTACACATCCTATGAATTGGAAACGCTGGCTGTCGTATCTGCAT  
GGGAGAAAATTTGTGATTTTTACTGACTGTAATTCAATCAAGTCTTCTCGAAATAAAGTCAAATGGCACCT  
AAGGTTTATCGTTGGTGGGAGTTTTTACAAACATTTGAATTCGAAATTGAATACAGAGAAGGTAAACGCA  
TAGCACACGTGGACTTTTTATCTAGGAATCCGGTGTGTCAAAAGAATAAAACAGAAGAGAAGCGAATTGA  
TCTAACAGAAATATCGGAAAACCTGGATACTGGTGAACAACAAAAGGATCCAGAAGTACCAGAAATCTT  
AACTAAGTTGAATAATGACGATTTACCATTGGCATTAAATTGCCACTTAGGAAATTAGATCAAATGTTTTGT  
ATAAAAAGATTCAGAGGAACTCAAGAACTCGTTGTTTACCGGTAGTTCTCGTGCAATTCGCTGGTCAGTT  
ATAGATCAGGTACATGAGTCTATCATGCATCTACGTTGGGAGAAAACGCTAGACAAGGTGTACGATCATT  
ACAGGTTTTCTAGTATGACAAAATATGTTTCGAGATTTTTTGGAGAACTGCATTACATGCAGAGTTTCTAAGG  
GTACGTCAGGAAAACCTCAAATGGATGTAAATCCAATTCCAAAAAATAGCATTCTTGGCATAACCGTTCA  
CATAGATATATCGGGAAAACCTTAGCGGAAAAACTGATCGTAAAGAATACATCATTGTACAAATCAACGCT  
TTTACTAAATACGTTTACCTGTTTCACAACTTTTTTTTTGGGTGCCAATACTTGTATAAACGCAATGAAATCT  
GTATTTTTGTGTACTGAGATTGGCTCCGCAAAATATAACCCGAGGTCATATTTAAGTATGACCCCC

>9\_rnd-5\_family-3470\_\_LINE\_\_Penelope  
GCATAGCAGCCAACATGAGCTACGCAAAAATCAATACTAAATACAAGGATTCCAAAAGAACAACAACAA  
CAACAAAAGAACAATTAAGAAATTCCAGCTAACATTGGTAAAAATTAATCCAACTTAAATCCAGCTAAN  
AATTTTTGTAAAAATGTAGAAAATCTAATTNAATACCTAACTTCATCAAAAACTTGACACAGCATTGTTGCC  
TATACTGACCACCAACAAAAACCAACCCCGACATAAAAAAGAACATNGACTAGACACACCCATTTATACCA  
TACCAAAATATTAAACTTANTTNTTAAAACACAAAACACAACCTATTACAAGAAGAAACAAAAACATATG  
GAAAAAGANAAAAAAGATAGAACAACCTGATGACCACAGATGACGCCAAATCGTTTTTCGAGAGCGGCAG  
GAACATAGAAAAGTGTTGTTATTACAACATTTAAAGAATAGACAAGAAACGAAACNCGATAGGATTACG  
AGATCAATGAAACCTTACCATAGCGGACAGCAGGAGATCAAAAAAACTGGTCCATAAACATAAGCAAAA  
CAAAAAACAGAATTCCTGCCAAGCGTAGAAGCGTTATCACTCGCTAAACGGCCGCAACTTCGTGGCACNA  
CTATTCAAGATGGGTCTTATTTTCGAAGGACGAAAGAAATAAGATGACTACAACAACAGCGGTACCTCCGA  
GGATATACGGACTACCGAAAATGCATAAGGAAGGAACACCACTGAGACCGATATGTTTCTCCATCGGATC  
TCCATCTTACGGGCTGTGCAAATACATGATAAAAATACTAAGAAATCTGACAATGGACTCTAGATACAAC  
ATTA AAAACGCGGTAGATTTTCANAGACAAAGTTAACAATTCANTATCAGGGAAGACGAAATATTAGTAT  
CATTTGACGTAGTATCCTTGTTTCCCAGCATACCAATGGAAGTACTGACACAATAAGACGAAAATG  
GACCAAATTANAGGAACACACCAGTATACCAAAAACAACCTATTTATGGACATAGTAAATTCTGCATTGAGG  
AAAACAGATATTTNAAATACGAGGACAAAATATACACACAACCTAAAAGGAATGCCAATGGGATCACCGG  
CCTCCCCAGTAATNGCNGACATAATAATGGAGGAACTNTTGGACAATATTACNGATAAATTGACAATCAA  
ACCAAGACTTTTGACNAAATATGTAGATGACCTTTTGGCGTAACGGAAAAACAGAAGTACACAAAATT  
CTAAAAGAATTGAATTCGTTTCACAAACATATAAATTCACCGTGGAATTAGAANAAGACGGGAAAACTAC  
CATTTTTAGACTATATAGTTAACAGATTGGACAACCTCACTCAAAATTAAGTGGTATAAGAAACCCATAGC  
CTCCGGACGANTACTCAACTTCAATTCAAACCACCCAAAGAGTATGATAATCAATACAGCACTAGGCTGT  
ATAAAAAGAATGATTAACATATCGGACNCAACATACCACAAAGAAATTGAANACGAAATTAANAAGCTC  
TTGACGAAAAA

>9\_rnd-5\_family-17\_\_Unknown  
CACCCATAACTGTGGGTAATTAGCGGAAAATGTTTTTATGAACTTATGTGCTTACCGTTCGATCGGCCGC  
AAACTCATATTTTCAACGAAATGNGAAAATCTGTNCTCNTTGGTGGNAATGGGGNCCAAAAATTTGGTGN  
GTGACGTTTCNCNCTNAAAATTAATTTTCAGAGATCTATAATGGNAAATNATCTAGGANCGNGTTTCACAT  
TTTTCGNANAATCACANACTCCTTCGGTAGAAGTGCGATTCCAAAGACTTTTATGGGCTAAGTTTTAAGTG  
GTGTCCGATTTGCTTCAAACCTTATTTTCAAAGCTCTACCTGCAAAAGAACTTAATGNATACGCGTTTCAGC  
GATTTGGAAAATTCCGCACGCAANTGTGGTTAATTAGAGAAAACGTTTGTATGAACTTTTTTGTATTATCA  
TCCGATCGGNNTCGAACTTATTTTTCAAAGATNTTCTNAAAATTCATTTGAGGCGTNTCGCACCTTTCGG  
AAAATCCNTCCTCCTTGGTGGAAATGGGAGTCAAAGATTTNATGGNTGGCCTGTTTCGCGCTNAAATTNAT  
TTTAAAATCTCTTAGAAAAATAATTTAGGTTGTGCTTCACATTTTTTTCGGAGAAAAAAGTGTGATTCTAAG  
AAATTTTTGTGAAGTTTTAAATATAGTACGATTTTGTTCAGCTTATTTTCAGAGCTTCACCTGCATAAAAA  
CTTAATAAATAGGTATATCCAGCGGGTGGAGANATTCCACNCACATAATATGTNNGNAANTGGGGAGAA  
AATGTTNCAACGATTGTGGCAANCTNNTTGTCTATCATCCGNTNGGCCTNAACTCATTGCCATTTTCAG  
GAAAATCCGTTGTTTCGCTGATTTTTTTCGNAGCATTTCANGCTTTTGANCAAANATTTNATGGGTGNCGTT  
TCGCGNTNAAATNAACTTTCAGGGATCTCTNNGGAAAATTAATTTNAGACGTATTTNACACTTTTCGNANN  
ATTATANCGTCCTCGCTGGAAAATGCGATTGTGAAGANTTTTCGTAAAATTTTAAGTTTGTCCGATCGGCTT  
CAAATTTATTTTTAAGCTTCACCNTGTGCGCAAGAANTTAATGAATANGTATATCAGCGATTTNGGAAATT  
CCACCCGCAANTGTGGANAATTAGCGGAAAACGTTTGTATGAACTNTTTTGNTTACCATCCGATCGGCC  
TCCAAGCTCATTTTCAACGANCTNTCTGTTCAAATTCATTTTAGAGGTTTTTCACATTTTTTCGGANAATCCA  
TCCCTCTTTGGTGGAAACGGGNGTCAAAAATTTGGTGGATGACGTTTCGCGCTAAAATNAAATTTTCAAGAT  
CTATAAGAAAATCATTAACGTGTTTCACGTTTTTTCGCAAATTNAAACNCCTTCGGTAGAAGTGCGATTCA  
AAGATTTTTTGNNGCTAAGTTTTAAGTNGTGTCCGATTTGCCTCAAACCTTANCCTTAAGGCTCTACATTGAA  
AGA ACTCAATATATAAATTAGTGCATTAATGTCTACAACCTTTGG

>9\_rnd-1\_family-361\_\_Unknown  
GAAGTGTCACTTTTTAGTGAGTGAGTGTGTAAGGGTAAGCGTATATGTGTATGAGTGCGAATGTATGTGG  
AGCTCGCTATAGAGCTAGTTGCGCGACGGCAACTGTATTATAGCTAATCTGTACAGCATATGTATGTATAC  
ACATGCATATGTTGTTTTATTGGGTTATTGTGTTGGGTGAGCTGTTAGGTTATGGCAATTGAGGGGAAAAG  
AAATGTATATATGTATGAAAAAGTAATTGAGTACCTGTGTGTCTTTTTGTTTTTGTATTAGTTGTATATT  
TGTGTTTTTGTGTCAATGAAGTTATGTGTGTGTGATTTTTGACAGTTGTTAAAAAGGAAATTGCTCTTTTGT  
TGTGTGTGTATGTATATATAGAGGTATATATATGTATATATACATCTACATATGGATATACATATATGCAT





TTCTGCTGAAGAAGCCGGAGTCAAAGGCTGTTTCCAAAAATAATAATCGAGGTTTCGTTTTCTGTGTTCCGTG  
GCTAGTGGAAGAAACGATCAANTGACCCCAAAATNCTTATATTGCGGTTCCAAANGCCATTTCGATATTAA  
ATTGNTCAGCNTATGCCGCGTTACAGTACTAAGNCGGCTCCTTTATGTATCAATTGCCTTTCGGAAGGGGCA  
CACTGTTGCCAAATGTAAGGCAAACAAGTGCAGAAATATGAAGTCGTTCTCATAACACACTGTCGCATAGA  
TACTCTGCCGTTTCTATCACCACCCCTTGACTCCGCACAGGATCAACCATCGACTTCACTGCTATGCATGC  
GAATGTGTCTGATAGTGAAACGAAGTTGGCGAGTTCGTTTTGGCTAGATCTTTACTCGATTCTGGATCACA  
AATTAATTTTNTAACAGACGAGNTAGCACAAACGATTGCANCTGCGTAGAGAAGAGGCTCGTATCAGCTTA  
CTTGGGATTNCTCAATGCAATACAGT

>Ref\_dvir.36.87.centroid

TTCGACGTATCAAAGATATCCGCACTTTGTAGTTTTAAGTTTATACAGTCGTAATCGAAAGTACCTTTTTTCT  
ATAAAAGGCAGAGCACGAAAAAAGCATTTAAGTATTCGAGCTCTTGCCGCGTTTCGGAAGGCATCGGCATC  
ATCTTTAGTGGAATTATTAAGTTTATCCTTCGCGATATTCTAAGCCTAAAATGGGTTCAAATATTACTGA  
ATTTTATAAAAAATAAGACTATTTTCTTGACCCGGTGGCAGCGGATTCCCTTGGAATAATGTAGGTAAACCTTG  
ATATATCAAGGACTATGCCGGACACAGTTTATCGAGTACAACCTCGATTGCGTTTAGTGTGTGTGATACTTA  
ATTAAGTTTAAAATGTGATTTTTTCTTATTGATGTGTGTCCCTCAGTGATAATTGAGAACTGTTGCGATCA  
ACGGAGGTGGAACGTATCTATATGCTAATACGGCCCAAACGTGGCGAGCAAATCCAGAGTCGGATGGCTG  
TTCTTCGAAGCAATTTTGTAAGTCGCCCATGATCCGAAGAAATAATTGAACTCTTACTCAATGCTCCTGGA  
AATAGATGTTTACGCGAACTGCTTAAATTGAAGGCCAACTCCCTGGAGAAGGTAAATACCCATAGCTGGGGA  
CTGTGCACTACCGGACCTGGGATTGAGCGAGGCAGACAGGCAGGTGCTGACTGAGGAGGTTGCAAGTGG  
TGGTGCACAGTGCAGCCACGGTGAACTTTGTGGAGCCGCTTAGCAGCGCGTTGAGCATCAACACGCGAGC  
AACTCGTCTACTTGTGCAGCTAGCCAAGCAGATGGGCCGCTTGAGAGGCATTTGTCCATGTGTCCACGGCGT  
TCTCTAACTGCCCCGGTCGAGCACATCCGCGAGTGCTTCTATCCCGAGCTATTGAGTTGCTCGGCTGACAAG  
GTTTTGGCGCTGCAGGATCAGCTGAGCTGCGAGCTGATTGACCAAATGACACCAGCCCTGCTTGGAAGT  
TTCCCAATACCTACACCTACACAAAGGCGCTGGCGGAGCAGGTGCTGCAAAGGGAGGCTGCCGATCTACC  
CATATGCATATTTCCGGCCAGGCATGAGTATGTGAGGATCGATAGCCAAGCTTCCTTTTGATAATATTTTG  
TCTTCCTTTGGCTTAAGTTCTTCCCAGCTATAAGGAGCCATTTAAAGGATGCATTGACAACCTTTATGGAC  
CCATTGCCATTTTCATATGGTTGTGCCGCTGGCGTTGTACGCGTCGTGTCCATAAGAGAAGAAGCCCGAAC  
AATATTGTGCCAGTTGACTATTGTGTCAATTTAGTCCTGTCTGCGCTGGCAAGCAGCTGTGGCAACTGC  
TCAGCGCCGGGTTCCCTGCACAAGATCCAACCTATTTATAATTTTGCTCCGTCCGCTCAAAACCCAATAACAT  
GGAGGAAATACACGGATTTGTATGCAAACAATAAGCATATTTATCCAGTTAATCAAATGATATGGTTCCC  
GTT

>9\_rnd-6\_family-1293\_\_LINE\_\_CR1

TAGGTATAATAAAAATCAGCCTTATCCTTATCAGTTACAGAGGTGAAACTGCATCTTAAATCCCATTATTA  
CCGAAAGTTCGCTTCTTAGCGACCTTAACACTATCAAGCCTGGTGGTGTTCCTGCTTGCGTGCTTAGGTAC  
TGCGCTGCAGCATTATGTAAGCCTGTTTTACAACTTTTTGAATTGTCCGTAAACACTTCATCATCCGACCAT  
TTGGAAGGAATCATACTATCCCTCTCCAAAAGAAAGTGACTAAGTCCTATGTTGAAAACCTATAGAGGT  
NTTTTCAAATTATCCGCTATACCTAAAGCNATTCAGCTGAACATTTATGTAGTTCTATTATTTACCTTCCC  
AGCATGGGTTCGTGAAGCGCAGATCTACAACCACTAACCTTCTTGAGTTTACTTCGTTTGTAATTGATGGG  
TCTAAGAAAAGAATGCAGACTGACGTCATCTATACTGATNTCAGTAAGGCTTTCGACTCTGTCAACCANTC  
CTTGCTGCTTCATAAATTATGCCTTCTCGGCTTCCCAGTCAATCTTTTGAAGTGGATTTTCAGAGTATTTGCG  
TGATAGAACCCAAAAGGTTCTAAACGTATCTGGTGACTTCCGGTGTTCCCTCGATACTGTCTCGCTCTCGAG  
TATTAATGTATGCTGATGATGTAAAATTATGCCTTGCATATAAAGATATGGCATCATGTTATCTCTTACAA  
GCTGACATTGATGCGTTTCAGGCTTGGTGTCTAGCCAACCTTTTAACTTAACTGCTCTAAATGTAAGGT  
AATGACCTTCTATAGAAGCCCTCCTTGATAGCTTACCGCTCGAGCGTGTTAACAGTACTTCTAATGAAGTT  
AATGATCTAGGTGTCATCCTTGATCATAAACTTAAATTCGACTCTCATGTTAAGACCGTGGTCAATAAGGC  
CAGAATAGTTATGGGTTTCATCAAGCGATGGTCGAAGGAGTTTGAACGATCCGTACACGACAAAAACACT  
TTATATATCTTTGGTACGANCTATTCTTGAGTATGCCTCATGTANCTGGTCACCACAATATTCGGTCCACCA  
GGACAGAATTGAATCCGTTTCAGAAACAATTCTTGTTGTTTGCCCTTCGTGGTTTAAATTGGGATCCTCGCG  
TGCGGTTACCGTCATACTCAGGATACAGCAGACTTCTGATGATTAACCTTCCTTCTTTGATTAATCGTAGA  
ACCATGCTGGGTGTAATATTTATTCATAAACAATTACTGCTGAAATCAAATCTTCTGTGTTGACTAGCCA  
ATTAAATTTCTCTATACCTAATAGACTAACACGTAATTTTGTACCCCTATCGCTTCAATTTGGCTCAACTAA  
TTATGCTTTGCATGAACCGTTCAGGGTTCTCTGTGATGACTATAACAAGCATTACAGAGTANTTTGNTCGG  
TATCTTCACTTCCTCGTATAAAGTCTTCTATTCTAACTATTTAGCAAGTAGATAGTCTT

>160\_rnd-5\_family-152\_\_LINE\_\_I

CGCAACATTGAGGATATCCTAAAAAGGGACGAAATACACAATGGGACACTTACGTCCATAGATTTAAGCA  
ATGTAATCCGAACAAGGAACCCGAAGTGGACACACCGCTTTAACCCACGACCACCTGCTTAAAGGAAAAG  
CCAATCCCAGCTGCCCAAATTGCGGGGCAGAATTATCAATCCAACACATATTGAATAACTGCCCACAAC  
TAATAACATTAGGACTTGTCTATTTGGCCGAATCCAACCTACCTCTCTTCTTACCACACCTACTACTATAA  
TGTAATAATTGCTAATCAAATTATTAGACACCGATTACATACTAAAGAGCATATAATAATATATATATAATT  
TAAAATAATATACAAATAATACTATAAATAATTTAACTGTGCGAGTCGATGGCCTTAGTAGCTAGCACTCCC  
TTCCGTTAGTTATTATATTAATTTTTTGTACGNTGGACCCANTGAAAATGGGTAAAAACGGNTNCANNGT  
ATTTGTGCAAAATCTAAATNTATGTNACTANGCAGTAAAAGGAAGCATCCCCGGCCCCATAAATAGTATA  
TATTCCTGATCAGCATCTGTAGCCGAGCTAGATCTAGCCATGTCTATCCGTATGTATGAACGCAAGCATCA  
TAGNACCTGTAAGAGCTAGAGACTTCGAAAAGTCATTTTTAACTTGGGATGTAGGTCCTCNTANTGCCTCA  
GNCCGAGTTCGTTTCCGAGCAATCGNTTAGCANCTGTACTCNGCNTCTGTACGAGCNAGAGACTTCGATA  
AAAATCGACTAGNGNCNTCNTGTTNCTTGCCCCGTTTCCAAGCAAATCGCTTAGGTTTTAAAAAATGGGA  
GCTNGAGTCACCAAGCNTGATANGTNGCTTCTAGAATATATATGTACCTACATATNTGCATATCAAGTATN  
TTTCATTTTATANCTATCGACCACCNCCCCGCTACCANCNCANAGNTATACAGTNATGTNAATAANCCGA  
NTNNNACCGCCNANCAATTTAAGNCACNATTTNNATGCAATTGACTTTTGTGAGAATACACAAATATTCT  
AAGGTACACTAAGATATACTGTAAAAAATTGCATAAAGATCGGTAAAGGAAAAAACAAAGTTATATGGA  
ACTTTAAGAATTTCTGTATACATGTACACACACACATTTATGCGCGTCTGCTTCGCATTCTAACAGCATGA  
TGGTAATTGCGACTTATTTCTGTAGTGCTATTTTAGTTCCTTTTTANACCCCGAACCCATTGAGANTGAGTA  
GNAACGGTTTATTGTATTTGTNCGAAAACCAAATGTATGTAAACAGGCAGAATAGAATATAAGTATATATA  
TATTTGATGTTGGAAGAAGANGGTACAGGGTATCCNCTAGTCGNGCGCTCCCGNCTGGAGCACTCTCGCT  
TGTTTCTTTTAATATAATAATTAATCACGTAAATAAATAATGAGAAAAAGACATGAAGTTCAGATAGAA  
T

>9\_rnd-1\_family-41\_\_RC\_\_Helitron

ACTAGCGGGTATAGCCCGGCCTTGCCCGTGGCACTTATGTTATAAAATCAATGTTCTCGAATAGCTTTGAA  
AATGATTTTGAAACTGAGCGGACAGTAAACAACTACTCTCATACAAACGTTTTCCGTCATTTTACCCTG  
TTTCGAGTGGAATTTCCCAAATCGCTGAAACACGTATTCATTATATTCTTATATAGAGCTTTGAAAATAAG  
TTTGATGCAAATCGGACACAGCTTAAAATTCTCAAAAAATTACTTTAAAATGCACTTTCCACCGAAGGAG  
CTTAGATTTTGCAAAAAATGTGAAACACGTCTCAAATGATTTTTTATGTAGATCCATGCAAATGAATTTGA  
AGGCAAAAGGCCACCCACCAAATCTTTGACTCCCATTTCCACCAAGGAGGAATGGATTTTTCGAAAAGTG  
TGAAACACCCCTCTAATGAATTTTAGCAATGATCTTTGAAAATAAGTTTGAGGCCGATCCGATGGTTAACA  
AAAAAAGTTTCATACCAACGTTTTTCGCTAATTAACCACTGTTGCGGGTGGAATTTTCCAAATCGCTGAAA  
CACGTATTCATTAAGTTCTTATGTAGAGCTTTAAAAATAAGTTTGAAAGCAAATCGGACACNACTTAAACT  
TCGCCCAAAAAATCTTTGAATCGCATTTCTACCGAAGGAGCTTAGATTTTGCGAAAAATGTGAAACACGT  
CTCAAATGATTTTTTCATATAGAGCTTTGAAAATGAATTTGAGCGCGAAACGTCACCCACCAAATCTTTGAC  
CCCCATTTCCACCAAGGAGGAATANATTTTCGAAAAGTGTGAAACACCCCTCAAATGAATTTGAACAAAG  
ANCTTTGAAAATGAGTTTGAGGCCGATCGGATGGTAAACAAAAAAGTTTCATACAAACGTTTTTCGCTAN  
TTNACCACTGTTGCGGGTGGAATTTCCCAAATCGCTGAAACACGTATTCATTAAGTTCTTATGTAGAGCTT  
TAAAAATAAGTTTGAAAGCAAATCGGACACCACTTAAACTTCGCCCAAAAAATCTTTGAATCGCATTTCT  
ACCGAAGGAGTTTAGATTTTGCGAAAAATGTGAAACACGTCTCAAATGATTTTTTCATATAGAGCTTTGAA  
AATGAATTTGAGCGCGAAACGTCACCCACCAAATCTTTGACCCCCATTTCCACCAAGGAGGAATACATTTT  
TGGAAGAGTGTAACACCCCTCAAATGAATTTGAACAAAGAACTTTGAAATTGAGTTTGAGGCCAATCG  
GATGGTAAACAAAAAAGTTTCATACAAACGTTTTTCGCGATTTTTCATACTTGCGGGTGGAATTTCCCGA  
AACCCCGTCTTAACGTGCACCTTCATCACATAAGGTAACACAGTGAAAATTTAGCTTCCTAGCTCTTAC  
GGTTTGGGCTGTGCGTTGATCACCAATCAGTCAGTCAGTCAGTCAGNCAGTTTTATATATAGAGAT

>9\_rnd-1\_family-39\_\_LTR\_\_Gypsy

TCGATCGCTTGGAACGGAGTAAGTTATCGATTATCGGAAATAAACTCGATCTGCGCGGGAACTAGGAGC  
ATCTACATCTAAAATTTCAAGTCTCTATCTTTTATAGGTTCTGAAATCCTTGCGTTCATACATACGGACGGA  
CGGAAGGACGGACGGACGGACAGACAGACGGACATGACTAGATCGACTCGGCTATTGATGCTGATTAAG  
AATATATATACTTTATAGGGTCTGAGGTGCTTCCTTCTGCATGTTACATACATTTGGATTTTGCACAAATAC  
AATATACCCTTATACCCCATTTTTTCATGGGTTTCAGGGTATAAAAAGGGACGAGGAGAGTCTGTCCAAAAA  
ACGATAACGGTAGACTCAAAATGTCACCTGGATATAGCATGTCGATCCTTTAGAAGGATTATCAAACACT  
GTTTAAAAAATAAACCCTAAATAAGTGTGTTAACATGTTTCTTAAATATCAAAAAACAAAAACCACTA  
AGCATACTAAAACGCCAATAACCAGAACACAAACACCAACAACAGCTTTTGATCGATATCATTAGTCCAA  
ATTTAGTAAGTTCTACCAACAAAAGTGCAACAACCTTTGCTAAGACGTTAATAACGGACATGTGTACAG



AAAGGAATNTTGCCAGATGACAAGAAATACGACGTCATCAAAAATTATCCAGTCCCACATGATGCGGACA  
GCGCGAGACGATTTCGTTGCATTCTGCAATTACCGTAGACGATTTATAAAA

>9\_rnd-5\_family-5878\_\_LTR\_\_Gypsy

GTTACGGATCATAGGCCATTGACTTGGCTTATGAACCTTCAAGGAACCAAATTCAAAAATTGGTTCGATGGA  
AACTACAGCTACTCGAGTACGACTACGAGATAATATACAAGAAAGGACCCCAAAACGTAGTAGCCGACG  
CCCTTAGCCGCGTCACTGGCGACGTAAATATTAACGACGTTGTTCTCCCCATAAACAAGAATAACATTAAT  
ACGATTCCTATTTCCAACAAACCTTTAAACGAATTCAATGTACAGACTGTATTCAAAGTTGGAACACAAGC  
TGAAATCTTGACTTCTTCCGTACCTTTCAAAAACAAAATCAGAAGAACGATATCAGAACACAGTACGAT  
AAAAAAACAATACGACTAATATTTTGA AAAAAGATCCTTAAACNTAACAAAACATGCGCTATTTTTGCACC  
TGACGANATTTTTTTTAAACTATTGAGGAACTTTTAAAGAATTCTTCCTACCAACTCAGTTATATAAGG  
TAATTAGATGTGTCACGCTACTAAGAGACATAACCGACCCAAACGAACAAGAACTAGAAATACGCCAAT  
ACCACGTGGCAAACAACCACAGGGGAATAGACGAGACCAGTAGCTCACCTAAGAAGATCCATATATTTCC  
CGTTATTAAGACCAAANACTCAGGAACAACAGGCAACCACAGAACTAGAATATTCTGAAACAGAAAC  
CCCGTCATGCCCTNTGCAGATAATACACACAGACATTTATGCNATTAACGGAAAAACCATCTTGACTATC  
ATTGACAAATTCTCAAAATTTGCTTCAGGCTATACAATTCCGACCAGAGATAGTTTAAACATAGTTAAAT  
CCATGAGGAATTTCTCCTACATTCGGAATCCCGGAAAAANCTTATTTGCGATCAAGGTTCCGAATTTAC  
GNAAAAATTTTTAAAGATTTTTTGCGCACAATATAACATATTAGTGCATTTTACTTTATTTCAACAATCTTCG  
AGTAATTCCCCAGTGGAAGACTCCATTCGTCTCTAACAGAGATATACAGAATAATTTTAAGCAAAAGAA  
ATACAGAAAAANTCAACTGCGACCATGAAGACATTTTCNTCGAGACGCTGACAACATACAATAACTCTAT  
CCATTCAACAACAAAATATACACCCTACGAGATCTTCCACGGAAGACCGCACATACTAACTCAAAACGCT  
TCCCAATAACGACACGACATTATCTCCAAAACTTAACGAATTCCGAAATATCATCTACCCCGAGCGATA  
GAAAANAAAACGAGAAAATAAAATGACAGAACTGAACGAAAACAGAGATTCCCCAGAAACCCCTCAATG  
AAGGCGACACAGTTTTTTAGAAAAGAAAATAGGAGAAAATAAAAATAGTCTCCAATTTTTTGCGCGGTGAATA  
ACTTTGAGACGACGTTATATTATTTAAATGTTTATTTATAATATTTGGATAA

>160\_rnd-1\_family-90\_\_Unknown

TCGAACCAAAGACAATATAAACACTAAGATGAGTAACGCCCATACATTTGAATGCGACGCAAAATTTCTA  
GCCTGGCCTTTCATCTGGCCTTTGAGGCTTCGTACGGCATGCCTGCCGACTGGTTGTTCTGTTCTCCAAAGA  
CCAGACGAACGAATGCCGAAGTCGCGGCTTGCTGATGCTGACACGAGCTACGAAGTTAGTCGCCAGCCTG  
CCTTCAGCAAAGCTGGTCGATGCTGCTTTGCGTTCGTTTCGTTTTCGAAGTACATTGAGCGAAAAAGTTTAG  
AACTTACGATCGACGCAAAGTGCTTGTGCTTTATCCATGAAATGCATGCTTTATTTAAATGATATATTACC  
CTAGATATTAACGATTAATTTTACAGGAAAATTTAAGAACTTTATATAATTTTTTACACAAGGCGCTTCTTG  
CGCAATAACTATGTAAAGAAAATAGCACACATAGATTGATTTCACTTTTCTTTTTGGACAGTGTATGCTCG  
AGAAAAGTTCTTGTCTCAGCCAATAGCGTGCCTGACCTTTCGTTGTATGCGTGAATTATACATGCATAAG  
AACTTTAAAGTATGTATGTATGTGTTGTTATTCCTGCTCTGGCTTTAGCTGGCAAGAAATTAATTTTGTTA  
GTTTTCTAGCGCAGATCATGACCTATCCCAAATTTGTGTTGATATATGAATGCATTTTGTGTACTGAGGTTG  
GCTCCGCAGAAAATATGTATTTCTAAGTCGATGCAAATATTTACATAATTTCTTTAAATTAATTAATATT  
ATTTTTATTCTCCAATTAAGAAATAAAAGAGTGCTAAAAAATACAATTACATTTCAAGTCGACCCGAAGG  
TCATATTTAGTTATGACCCCATTAATAATTATAATGGCCTCCTCGCGGTGTTCCCTGCGTACTTTGTTCTTTA  
TAATTCGAACAACAAAAATAATAAAATAAAAAAAATAAAATTAATTAATGTATCTTTGAAAACAACA  
AATTTGCATTNNTANTTCTAAATNTANATTANATTACATAAATATTTGCATCGACTTAAAAATACAAATT  
TTTTTGACGGAGCCAACCTCAGTACACAAAATGCATTCATATATCAACAGAAATTTTGGGTAGGTCGTGA  
TCTGCGCTAAAAAACTAAGAAAATTGTTTCTTTGCCAGCCAGAGACTTTGCCAGAGCAGTGGATAACAAC  
ACATTCAAATATGCTGTTATGTATGTATATTCACACGCATACAAACATAATTGCTTGCACGGCCCTCATAG  
AGCCGAAGCTGAGAGCAAATTCTATTTTTAGCTTTTTCGTTCTCTCGGCTGTGAGAGCGCAATGCTACAGA  
TTTCGTTTTTCGTTCTCAATTTTCAAAAAATCAAGCTGCATAGTAGCATTTTGTTGTATGGCGTTACTCATCT  
TAGTGTTTATATTGTCTTTGGT

>Ref\_dvir\_1052

CCTGGAAAGGTCATCTGTGCGGTGGGGGTGAACTAGTGGTGGTTGTTGTTTTTCAGACTTGGAATATGAAA  
TCATGGTTGTTGAGCGTAATTAATAGACAGCGTGAAATCAAAAGAGGTTAAACTGTTACGCTAAAACCG  
GCGGCTCATATATCTGTTACATGACCTATCATATTGGGCGCCTCAGTCTATTCTCATGCAATATGAGACTC  
TTCCCATTAAACTACTTCACTTTCAGTATATCAGTTGCTTGAGTCATCGGAGCCGAGGCAATACAAAGCGT  
TCGGCAAATGGGAGTGGCGTGTCACTACTTTAAGCGGCTCCGATGCCGTGCTCTCGATTGGGATTCAAGTG  
CCCGTCGATTTCTGCAAGCAGAGGAATAAACAGCTTGTCTTCGGACGTAATACAAATGCACACATTGCTC  
ATTAATGTGGACGAATGGAATATCTTTTGTGAGGAGCATGTCTCTTAAATAGATAGGGTGTGTTGGTCCACCT

TCAAAATGCTTTTCGGATGCAATAATAGATCATGATCATTTTTTTTGATTGTGTTAGAATGTCTATCTCGAGCG  
GAATAGTAAATAGAATACAATGAAATGCTTGACACGATCTTTGTTTATCATTAAAGCTGGCAACAGTGTTG  
AAAGAAGAGTGAAAGTTTGTACATCTGTGTGAGCAGTAATGTCATTACTGACGCAAATCGTTAACATTTG  
TTATTGAAATTCGGTGGAATTTAAAAATTATATTAATATATATTGGATGAGAAAAAACACCGGATCCAG  
CTTGTCTTCTTGGGATTATATGAAATATATTGTAGGTCTGCCTGGCCTGAAAAATGGGAGGTTGTGGTCTA  
GGACCTATTTAGTGGCTGTCTTATAACCTCAAGCAACTCTTATTGCTCTTCAACTGCTTTAAGCAATGACTG  
CATGACTACATAGACACCTATAAATTTTTATATTTTATTTTCTATCCTGCCTACCACACTGAAAGCCGTGTT  
TTTTTGATTGCCTTGCTGAAGGTACGCAACATAGAACAAGGCGAATTGAAAAACAGATGATAAGATAAG  
GTTATATTTGCATTTCGCTGAATCCATTAATAAATGAGTAAAAGGGGTATAGTGTATTTGTGCAAATGTAGGT  
AACAGACGGAAGATGCTTCACAACCAATCATAACCAATATCGATGCAAAAAGATATTGAAATTCGCAAAT  
ACCTGTTTCGCGTATGGGCCTGCACATTTGGTTATAGGTATATTTATCGAGCCCATAGTGAGTATCGCCGT  
TAAAGTTTGCTGAACGACACGTTTATAAGCAAAAAGCACTACCTGTGCGAATTTTAACCGAACAACCAAAA  
AAGAATTTTAATTAAATCACAGGTAATTGTGAAAGCATTAATAAATTAATAACCTTCCTGCCAAATTTCA  
GAATCTGTATAATAAAAACCTACCAA

>9\_rnd-1\_family-258\_\_LTR\_\_Gypsy

TGTTNAAAATTTTGTGTGTCATGTTTTTCGTAGGGTGTGTGCTACTTTTATTTCTTGCTTGTTGTAGTATTCTG  
AGTTCGTGAGACGTACTGATAATTGTGGTACNTGTATTNAAGACATATATATTTTGANAAGTTCTGTAGGC  
TATTGTGTTCTACATTGTTGTCTATTTAAAAATGTATTAATTATATTCTGTGAGAAGTCGTTTTTGGTCAAA  
TGTGTGTTAATATCGTGTCCAATTTCTTTGTGGTCTCTTGGTTAGTGCTCTGAAGATGGTTCCCGAGATTTA  
GCACTCAAGGTTATATCAGGCTAGACGCCTCTGAATTCGAAAATGTAAGGTGGTCCGAGTCAAATTTGAT  
TGATGCGAACAATAGGCAGGTAGTCATTAATACACAAACACAGACACAAATTAACAACTCACCGACAC  
GGTGAACGAAATAATTAATGTAAAAGAAATTAATTGGTAAACACACCCGCATTTATATGAAACACTATTA  
GTAAGAAATATAATACTTATAAATCAAATATCGAACTTGATACTTACAATTACACTAGCCAAAGCGGGTA  
TAATAAACCCCAACAATATTTGACCACGATGATTTGAAATCAATTATAAATAAACATCCTGTGCGAAATTCCC  
ATAGTTAACCCAACCGAAGCGTCTAAAATCAAGGTTCTTCAGTCCGAGAACATTGTCCATATATTAATAGC  
GTATCCCAGGGTCAAGCTCTTTTGCAAGAAAATCACCATCTTTCCGGTGGCACACCAACACGTCACACTAC  
AGCTACAAGATGATACAATAGCCGAATGCGACAATGACATTCTAGCGGTCAATGAATGAGTAACGACGA  
CCTACGCCTAAAAACCATTAACAGCTATAAAATAACCGAGGACGGTCAAAAAGCTTGAGGGGGGAGTAGT  
TAACACATAAGAATTNCACTTCATATTTATGTCATAAGAACACACTTTTGTTTATAAGAACGCAAGAATGT  
TGCAGTGCACTTTGCTTACATTGCGACATTCTGCTGACGCATGAGTTCAGTGCCCGGCCACTGCGGCCAGC  
AGCGGTAACCTGACACTTGCCTATGTCGCAAGCGACAGTGTTGGCGTATGCTGANTCGGCTTGCCGGATA  
TAGCAGCTGAGACTTATGCGCCTAGCCTTTGGGTTGAGATCCAATTCAATGTTTCAATTCTAGTTTAGTTTT  
GTATCCAACCTTTGTAAGAACAACCTTCTTCAAATATACTGCTCCGGCACTTGCCGTCATCAATCCGTTATAC  
TAATTGTTTCATTGCTGAGCCACAAGGCCAGTGATTTGGAAGGCTAGTTGCTTTCCGAACATAATCTACAA  
GGAATATAACCTTACCAATCTCAGCACCTGTGACGAGGATCTGAATATACAACATCAACATCTACAATTG  
AGAAATCAAATAACTTGCA

>Ref\_dvir\_640

ATGTACGCATGGTGTGTTGGAGAATTTACAAAGGGAATTTACCATCGAATTTACAACTTGAGCTAACAGT  
GCGATTGCTGTTGCGGAGAAGCAATTCACAGAAGAGTTGGCATCATTTTGTACGAGCACTTCGTAGACAA  
AAATTGAAAAGAGATAATAACAAATTTGGAAATATGCAAAGGATAGGAGATTTAAAAGTTGATCAGCTA  
AAATTCCTGTTGCGAGAGCGAGAATTGTGACAAAGTGGCACACGCGGATGAATTAATTCGTGATTACAGG  
AGCATGAAGGCTCAGATGAAGTTGAAAGGCCACATGCCCTATGGAGAAGAGGGAGGATCACTTTATCAG  
CTACAGAATGAAATAAAAAGGTTAAGCGAAATTTGTCAGTTTATAAGCATGCAATGCGCTAGTGCTAGTG  
GACAAATGTGCAATTCGCAACCGGCTATAACAACCTTAGTGCAAGATACAGAAAGCGAGGTGCATGATGA  
ATATCAACAAAGCACAGCCACACGTCAAGCTTCGGTCAAAGAAATTGCTAACACGTTGCCTGAGTTTGAC  
CCGACAGATTAGAATGCCATTTAGTCAATCAGTTCATTGATCGTGTCAACAAAGTGGTTGAGGCATATCA  
ATGGGACGAAAAGTTTTTAATGCTCGCAATCTACACTCGACTCAAAGGTCCAGCCAGAACCCGGTTTGAC  
TCTTCGCCAAGACCTAATACGACATGTGCAGACGCACTTCGCGACGAATTTGGTGTACACCAGATGAAG  
CAGAAATCCACTACGCCATGGCAAAATCGACAAGACGTCCAAAAGAGACAATGGTCTTCAGCACCGTGA  
ACTGCAGCAGAGTATCGCAGCAATGCACTTCTCAACAATGAAGCAGATGCGAGAAACGGCGGAATCCTAT  
TTTGCCAATCGAGGTAGACAACATGAAGTCAGAGACAGCACAGCTCTAAAGTATAGCAACGTTGAACAA  
AGGCCTGAGAAAGATTCAAAGACAATGAAACCAAGGCAACACTCAAATGTTATAATTGCAACGAGTTT  
GGTCACTTTGCAAATCAGTGTCCAAAAGAACCGAAATGTCAGCGCTGTACCAATTGCAACAAATTCACC  
CGAGTAACGTCAAGTGCAAGTCAGCTGAAGTAAATGTAAATCGTCTTGGTGCCATAAATAGAGACAAATG

GTTCTCTAAACAGATAATCGTCCAAAAACAACCGTACGTCGCTTTTATAGATACTGGTAGCCAAGTGAGT  
ATGGTTCGCAAGTCGGTTGCTCATTATTGGACAAGTATACTGATGTGTTTTCAAGTGGTCTAGAAGGAATT  
GGCCGCACAAACGTCATACAAGCCAGAATTACCCTTGACGGAGGACATGTTGTTTCTCAAGCACTATACT  
GCATACCTGAACCGAAATGAGATATTGTCACCGTCAT

>9\_rnd-1\_family-67\_\_Unknown  
ACCAAAGACAATATAAACACTAAGATGAGTAACGCCCATACATTTGAATGCGACGCAAAATTTCTAGCCT  
GGCCTTTCATCTGGCCTTTGAGGCTTCGTACGGCATGCCTGCCGACTGGTTGTTTCGTTCTCCAAAGACCAG  
ACGAACGAATGCCGAAGTCGCGGCTTGCTGATGCTGACACGAGCTACGAAGTTAGTCGCCAGCCTGCCTT  
CAGCAAAGCTGGTCGATGCTGCTTTGCGTCGCTTCGTTTTCGAAGTACATTGAGCGAAAAAGTTTAGAACT  
TACGATCGACGCAAAGTGCTTGTGCTTTATCCATGAAATGCATGCTTTATTTAAATGATATATTACCCTAG  
ATATTAACGATTAATTTTACAGGAAAATTTAAGAACTTATATAATTTTACACAAGGCGCTTCTTGCGCAA  
TAACTATGTAAAGAAAATAGCACACATAGATTGATTTCACTTTTCTTTTTGGACAGTGTATGCTCGAGAAA  
AGTTCTTGTCTCAGCCAATAGCGTGCCTGACCTTTTCGTTGTATGCGTGAATTATACATGCATAAGAAGCTT  
TAAAGTATGTATGTATGTGTTGTTATTTCACTGCTCTGGCTTTAGCTGGCAAGAAATTAATTTTGTAGTTTT  
CTAGCGCAGATCATGACCTATCCCAAATTTGTGTTGATATATGAATGCATTTTGTGTACTGAGGTTGGCTC  
CGCAGAAAATATGTATTTCTAAGTCGATGCAAATATTTACATAATTTCTTTAAATTAATTAATTTATTTT  
TATTTCTCCAATTAAGAAATAAAAAGAGTGCTAAAAAATACAATTACATTTCAAGTCGACCCGAAGGTCATA  
TTTAGTTATGACCCCATTTATAATTATAATGGCCTCCTCGCGGTGTTCCCTGCGTACTTTGTTCTTTATAATT  
CGAACAACAAAAATAATAAAAATAAAAAAAAAAAAAATTAATTAATGTATCTTTGAAAAANAATAATTTAA  
TTAATAATTTCAAATATAAAAAATTACATAAAATATTTGCATCGACTTAAAAATACAAATTTTTTTGTACGG  
AGCCAACCTCAGTACACAAAATGCATTCATATATCAACAGAAATTTTGGGTAGGTCGTGATCTGCGCTAA  
AAAATAAGAAAATTGTTTCTTTGCCAGCCAGAGACTTTGCCAGAGCAGTGGATAACAACACATTCAAAT  
ATGCTGTTATGTATGTATATTACACGCATACAAACATAATTGCTTGCACGGCCCTCATAGAGCCGAAGCT  
GAGAGCAAATTCTATTTTTAGCTTTTTCTGTTCTCTCGGCTGTGAGAGCGCAATGCTACAGATTTCTGTTTTCG  
TTCTCAATTTTCAAAAAATCAAGCTGCATAGTAGCATTTTGTGTTGATGGCGTTACTCATCTTAGTGTTTATA  
TTGTCTTTGGT

>9\_rnd-6\_family-70\_\_RC\_\_Helitron  
GTGCAAATTGANTAANTGTACGATTNTTTTCATACCCTCGNAGAGGGTATTATAATTTTACATAGAGACCT  
GTGTAACGCATGAAGGAAACATCTNCGACCCCAAGTGTANATCTATACGTATTATATAAAATCATATT  
TTAATTAATATTTTTGATAAGACCGCAAATTGACTAAATGCGAAAACCTGTGTTTTTATACCCTTGCAGAGG  
GTATTATAATTTTGTGCGGAAATGTGTAACGCATAGAAGGAGACATCTCCGACCCCATGAAGTATATATAT  
TCTTGATCAGCATCAACAGCCGAGTCGATATAGCCATGTCCGTCTATCCGTCTGCTGTCCGTCTGTCTGTTT  
CTATGCGAACTAGTCTCTCAGTTTNAAAGCTATCTTAATGAAACTTTGCAGAGNTTCGTCTTTCTGTTGCAC  
GCAGNACGTATGTCAGAACCGGCCGGATCGGACCACTATATCATATAGCTGCCATAGGAACGATCGGTGCG  
AAAATTAAGTTTTGTATGAAAAAAAACATTTTGTTTTTTAAGATATCTTGACCAAACCTCGGCATTTATTAA  
GANTACATTATACTCCTACGTGTATGCAAAATCCTATTAAGATCGGACCACTATATCATATGTATCGACAT  
AAATTNTCGGTCGAAANTTAAGTTTTTGTATAAAGCATGTTTCGTTTAAACAAGATATCTTGACCAAACCTCG  
ACATTTATTAGTTTNACTATACTCCTCATATATGGTGCAAAATCTATTAAGATCGGACCACTATATCATAT  
AGCCGCCATAGGAACGATCGGTGCAAAATTAGTTGTTGTATGAAAAACATTTTGTTTTTCAAGATATCTTG  
ACCAAACCTCGGCGTTTATTAGTTTNACTATAAAATCTNCTCATNTATGTGCTAAANTCNTATTAGGATCGGA  
CCACTATATCATATAACCAAGCNANAGGAACGATNNGNCGCAAATNAAGTAATTGTGCGATATGTNTTNG  
TACCCTTGCAGAAGGCATTATAATTTGACGCGAGACTTGTGTGACGNNTANAAGNAGACANCTTCGACC  
CCACNAAGTATATATTTATACGTATGTNTGAAATCATGTCTTGATCAGTATCTTGATAAGGCCACAAAACA  
ATGCGAAACTGCACGTTATTATGCCCTCGCAGAGGGCATTANAATTTNGTCGCGAAATGTGTAACGCATA  
GAAAGCGACGTCTTGACTCCATTAAGCATATATATTTTGTATCAGTATCAACTGCCGGCTCGATATAGCCA  
TATNCATCTNTCCAAGTCTGACCACCCGTCCGTCTGNCTGTCTTGGCGTGAAGTAGTCTCTCAGTTTGAAA  
GTTATCTTAATGAAATTTGCTGAAGTCCTTCTTTCTTTTGCACGCGAGCACATATGTCAAACCAGC

>9\_rnd-1\_family-331\_\_Unknown  
CATNGAGTAATAAANAGAAAGAGANGGCGTTTGGATCAAAAGCTCTTTTTAGAAATACTTCCTGCGAGAN  
AACGAGGTTGCAAACAAAAATTGCAAACACAACACCCGGCTGTCTGCAGCTACTTCTGCCGATGCCCA  
ATTCAATGACAACCTTCAAAACATTTTCCATAAGAACCAACAACAACCATAATCAAAACAAACGACTCGAC  
AATGAAAAAAGCACACCACAAATCTGTCTTGCTATCCCTTTTTGTTTGAGGCTACAGCCTATGATCTTA  
GCTTCTGCACCCCTTCTAACTCATTGTTGTGGTTTCTAAGCACTGCTATGCCTATAATTCGCAAAGTCATGTC  
TTCTTCTTCTCCACTCGCTTTCAACTTGCAAGCAGATCGGCAGATTTTTATAATTTTTTCATTTTTTCGACCAG

CAAGGCACCTTTTCTCAAAATAGGGTATTTTAACTATTCATAAGCGATGTAACCAAATAGCACAAACCNTC  
TTATATATACATTTTTATCCAATGTCTAAAAAATATAATTTTCGTATTTAGTGTGCAACTATTAGTACAGTCA  
ATAATAATTGTTTTCTTNATAAATTATATACCATTCTTATAAAAAAGGGTATCAATGCCGCGACCCGCCAA  
ATAGTTGTTGTATGTGTGTCTCATCTCACACATATTGGTGCAAATCTGCATATATGTATGTGTCTGCCAAGC  
CAAGGGAAGTCTATGAATTTAAGAAGATTGCAACGTTCTGTTGCGCATGTGACGTCACAGTCCAAGGCTT  
TTNCGTGCGATCATTTTCGTATATAAAATGATTACATATGTCAATCAATTATTTGCTATAAAGGACCCTATT  
CATAAATTATTTAAATGTACGTAATAAAGGTAGAAATATATACTAAACATCACAAGAAATAAAATTCTAT  
NAACTGTGACGTCATAATATATGATGTTGGCGCGCCGTGCGCGTAACCCCTTTGATCTGAATGCCATGGCCT  
GCTGGCATTCAAATTTTTTCTACCTACTTGGCGCCGAGACTCGGCTCTGCAACAACAACATTAGTACCCAAA  
TTGTGCTGTTGTTGTTTCTACGCGCTGCCTTGTAGGAACGACAGAGAAACCCGCAAAGAACACAGTGGCA  
TTATCTGTCCCTTTTCTTTCGACTGAGTTTCTATGTCCTCATCATGGCTCACAAACCTCTTGTGCGATCAAAA  
CGGGGGATGAAGAACAAATTGGGTTTCGTGCGCACTGTTGTTGTTTTGCAAGTGATTTGTTGTTGCCTTCC  
TATGGTAAATGAGCTTTTTTTTTTGGGTTTGATTTTTCGTTTTCGGGACCAACCCGATCTACGTCTCGTGGTTT  
TAAAAACGGTAAAAAAAGCTCAGAGTGTGAGTTCAGCTCTTTCTCTTTATTACTCAATG

>160\_rnd-1\_family-32\_\_RC\_\_Helitron

TTTTTATACCCTTGCAGAGGGTATTATAATTTTGTGCTGAAATGTGTAAACGCATAGAAGGAGACATCTCCG  
ACCCCATAAAGTATATATATTCTTAATCAGCATCAACAGCCGAGTCGATATAGCCATGTCCGTCTGTCCGT  
CTGTCTGTTTCTATGCGAACTAGTCCCTCAGTTTTAAAGCTATCTTAATGAACTTTGCAGAACTCCCTCTT  
TCTGTTGCACGCAGCACATATGTGAAAACAGCTGGATCGGACCACTATATCATATAGCTGCCATAGGAA  
CGATCGGTTCGAAAATTAAGTTTTTGTATGAAAAAACATTTTGTTTATCAAGATATCTTGACCAAACCTCGGC  
ATTTATTAGTTTTACTTTACTCCTCATATATATGCAAAATCCTATTAAGATCGGACCACTATATCATATAGC  
TGCCATAGGAACGATCGGTTCGAAAATTAAGTTTTTGTATGAAAAAACATTTTGTTTTTCAAGATATCTTGA  
CCAAACTCGGCATTTATTAGTTTTACTTTACTCCTCATATATATGCAAAATCCTATTAAGATCGGACCACTA  
TATCATATAGCTGCCATAGGAACGATCGGTTCGAAAATTAAGTTTTTGTATGAAAAAACATTTTGTTTTTCA  
AGATATCTTGACCAAACCTCGGCATTTATTAGTTTTACTNTACTCCTCATATATATGCAAAATCCTATTAAG  
ATCGGACCACTATATCATATAGCTGCCATAGGAACGATCGGTTCGAAAATTAAGTTTTTGTATGAAAAAAC  
ATTTTGTTTTTCAAGATATCTTGACCAAACCTCGGCATTTATTAGTTTTACTNTACTCCTCATATATATGCAA  
AATCCTATTAAGATCGGACCACTATATCATATAGCTGCCATAGGAACGATCGGTTCGAAAATTAAGTTTTTG  
TATGAAAAAACATTTTGTTTTTCAAGATATCTTGACCAAACCTCGGCATTTATTAGTTTTACTNTGCTCCTCA  
TATATATGCAAAATCCTATTAAGATCGGACCACTATATCATATAGCTGCCATAGGAACGATCGGTTCGAAA  
ATTAAGTTTTTGTATGAAAAAACATTTTGTTTTTCAAGATATCTTGACCAAACCTCGGCATTTATTAGTTTTA  
CTNTGCTCCTCATATATATGCAAAATCCTATTAAGATCGGACCACTATATCATATAGCTGCCATAGGAACG  
ATCGGTTCGAAAATTAAGTTTTTGTATGAAAAAACATTTTGTTTATCAAGATATCTTGACCAAACCTCGGCAT  
TACTATTTTCCCGGTACTTCTTAGATAGGGGCAAAGCACTATGAGCATTATGAAAAGGTTGCGGTGCTGC  
AAGGGTATTAGATCTTTGGCGTGCCGAAGATAGCCCTTCTTTCTCGTT

>Ref\_dvir\_548

CTGTAGAATCCAACATACTCCCCCTGTTGGAAGCCTGACTTTCAACAGAATCCTTAAGGGCAGCAGACAC  
AGCTTGTTTACGGCTCTTCGGATGATTCCAGCCGTGGTCTTCAGATCAGCTACACGATTGACTCCATCCTTC  
CCAGGAATCAAGTTAATTACCCTACCAAGCGGCCACCGCATGGGAGGCAGATTTTCGTCTTTAACGAGCA  
CCATATCGTTGATGCACAACGCTTGTGTTTGAGTGCGCCATTTAGCTCGCTGTTGTAGCAAGGTGAGGTAC  
TCTTCACGCCATCGAGCCCAGAACACCTGTTGTAGCTGCGTTCACACGCTGCCAGCCATCCAAACGGTCGTA  
GTTTAATTTGGTCAAGTCTGGCTCGATGATGGCTGATGAAGGACCACCAAGCAGTAGATGAGCAGGAGTC  
AGGACATCTAGATCTGCTGGGTTCTCTGAAAGCGAGAGTAATGGGCGTGAGTTAACAATAGCTGTGATTT  
GGCAAACAAGAGTACGAAGCTCTTCAAAAGTAAGTAAAGAGCGGCCGACAGAGCGATAGAAATGGTGCT  
TGGCCAACCTTCACTGCCGCTCCCATAGTCCACCAAAGTGCGGAGAACGGGGGGGATGAATTTCCACTCG  
ATGTCATCGGCGAGGCAGAACTGCCGAAGTCTTCCATGTGGGGATCGCTAAGCAAGACCAGCTCATTCT  
TCGATCCGACGAAGTTTGGGACCAAATTTGACTTTAGAAGGTCCGCAATAATCGACTCCAGTTACGGTGA  
AGGCTCGAAGACTTCCAGACGTTTTTGGAAGACTTGCCATCATAGGCTCGACAAAAATAGGCCTCGCCTGA  
AGCACCTCACACATCTACTGACTGCTTTAGAGACTGTTCTTAATCCACCAATCGGCCAATATTTAAGTCGA  
ATTTTGGCTAGAAGTGCACGGGGACCAGGGTGTAGATTCCTCTCATGAACTGAACGATGACAGCTAAGG  
TGATTGCATGACGCCGAGGCAGTATAATGGGGTGTGCGCATCATAGTCCAGGGACGAATTGCTTAGCCG  
GCCACCGACGCGGAGGAGGTACGTTTCATCCAGAAATGGTGCAAGAGATGCAACGGAGCTGGATTTTTTC  
ACATTTCCATGAGAATGAATCTCCTTGATGTCATCCACAGAGAAGATGCGAGTGCCGTGATGAATGTCTGC  
AACAGTGAGTCCATGATGCCTTATACGCTTCATAAATTTGTACACATAGCCGAATGTGCGCTGCATGGAAC



CAAAAGAGTTGGCGTGCTTCATCCAGATAAATCTGCATGAGCTCCGACTGGGCTAGGAACAGTGCCTCTA  
GAAAGAATGTCAGCTGGATTTTCGGTCCGTCGGAACATATCGCCACTCCATACTGACAGTGAGT  
>160\_rnd-1\_family-97\_\_Unknown  
ACCAAAGACAATATAAACACTAAGATGAGTAACGCCCATACATTTGAATGCGACGCAAAATTTCTAGCCT  
GGCCTTTCATCTGGCCTTTGAGGCTTCGTACGGCATGCCTGCCGACTGGTTGTTTCGTTCTCCAAAGACCAG  
ACGAACGAATGCCGAAGTCGCGGCTTGCTGATGCTGACACGAGCTACGAAGTTAGTCGCCAGCCTGCCTT  
CAGCAAAGCTGGTCGATGCTGCTTTGCGTCGCTTCGTTTTTCGAAGTACATTGAGCGAAAAAGTTTAGAACT  
TACGATCGACGCAAAGTGCTTGTGCTTTATCCATGAAATGCATGCTTTATTTAAATGATATATTACCCTAG  
ATATTAACGATTAATTTTACAGGAAAATTTAAGAAGTTATATAATTTTACACAAGGCGCTTCTTGCGCAA  
TAACTATGTTAAGAAAATAGCACACATAGATTGATTTCACTTTTCTTTTTGGACAGTGTATGCTCGAGAAA  
AGTTCTTGTCTCAGCCAATAGCGTGCGTGCACCTTTCGTTGTATGCGTGAATTATACATGCATAAGAACTT  
TAAAGTATGTATGTATGTGTTGTTATTTCACTGCTCTGGCTTTAGCTGGCAAGAAATTAATTTTGTAGTTTT  
CTAGCGCAGATCATGACCTATCCCAAATTTGTGTTGATATATGAATGCATTTTGTGTACTGAGGTTGGCTC  
CGCAGAAAATCGACCCGAAGGTCATATTTAGTTATGACCCCATTAATAATTATAATGGCCTCCTCGCGGTGT  
TCCCTGCGTACTTTGTTCTTTATAATTCGAACAAAAAATAAAAAAAAAAATAAAAAATTAATTAATG  
TATCTTTGAAAACAACAAATTTGCACTTTTATTTCCCTTAATTTATTTTGTATTACTTAAAAATAATAATAAT  
TTAATTAATAATTTCAAATATAAAAAATTACGTAAATATTTGCATCGACTTAAAAATACAAATTTTTTTTGT  
ACGGAGCCAACCTCAGTACACAAAATGCATTCATATATCAACAGAAATTTTGGGTAGGTCGTGATCTGCG  
CTAAAAAACTAAGAAAATTGTTTCTTTGCCAGCCAGAGACTTTGCCAGAGCAGTGGATAACAACACATTC  
AAATATGCTGTTATGTATGTATATTCACACGCATACAAACATAATTGCTTGCACGGCCCTCATAGAGCCGA  
AGCTGAGAGCAAATTTCTATTTTLAGCTTTTTCGTTCTCTCGGCTGTGAGAGCGCAATGCTACAGATTTTCGTT  
TTCGTTCTCAATTTTCAAAAAATCAAGCTGCATAGTAGCATTTTGTGTTATGGCGTTACTCATCTTAGTGTT  
TATATTGTCTTTGGTATTACCTTGTGCGGGAGCTCCCGACTAGAGGTCTT  
>9\_rnd-1\_family-14\_\_RC\_\_Helitron  
TTTTTTATACCCTGAACCCATTAAAAATGGGTATAAGGGTATATTGTATTTGTGCAAAATCCAAATGTATG  
TAACAGGCAGAAGGAAGCATCTCCGACCCCATAAAGTATATATATTCTTGATCAGCATCAATAGCCGAGT  
CGATCTAGCCATGTCCGTCTGTCCGTCCGTCCGTCCGTCCGTCCGTCCGTATGTATGAGCTCAAGGATCTC  
AGAACCTATAAGAGCTAGAGACTTGAAATTTTAGATGTAGATGCTCCTAGTTCCCGCGCAGATCGAGTTT  
GTTTCCGATAATCGATAACTTACTCCGTTTCCAAGCAATCGATAAAAAATCGATATCGACATCCTGTTTTTTT  
AGCAAATTGGGTAAATAATAAGAGCTAGAGCCACCAAACATGATATGTTGCTTCTAGAATATTATAGATA  
TTTCAAGTATCTTTCATTTTCATACCTATCGCCACCTCCCCGCTACCACCNCAGAGCTATAAATCAAGTTAAT  
AACCCAACCTTTTTATTGCCAACCAATTTAAACCACAATTTAAATGCAATTGACTTTTTTCAGAATACACAAA  
TATTCTATGGTACAATAAGATATACTGTAGAAAATTTTATAAAGATCGGTAAAGAAAAAACCAAAGTTAT  
ATGCAACTGCGCAATTGAATGGGGCAGCAGCTTTAAGAATTTCTGTATACATGTACACACACACATTCAT  
GCGCGTCTGCTTCGCATTCTAATAGCATGGTAATTGCATCTTTTTTTGTAATGTTATTTTAGTTCCTTTTTTT  
ATCATAAGTACTTAATTGTTGGTGTGGCTGCTGAGTAGAGGCATAGCAAGTGGTGCGGTCTGTCGCGAGTT  
CGAGCCCTACCGGGGAAAGTATTATTATTTTTTGTGCTGGTGTGGCTGTTGAGTAGAGTCGACAGTAAGTAAT  
GCGGTCAGTTGCGAATTCGAGCCCTGCCAAGGGAACCTTTTTTTATTAATTTATTTGGTGTGGAATAAGAG  
GGTTCAGGGTATCCCCTAGTCGGGAGCTCCCGACTAGAACCTCTTGCTTTATTAATTTATTTGGTGTGGA  
ATAAGAGGGTTCAGGGTATCCCCTAGTCGGGAGCTCCCGACTAGAACCTCTTACTTGTTTTATCATAAGTA  
CTTTATTGTTGGTGTGGCTGCTGAGTAGAGGCATAGCAAGTGGTGCGGTCTGTCGCGAGTTCGAGCCCTAC  
CGGGGAAAGTATTATTATTTTTTGTGTTGCTGGTGTGGCCTGTTGAGTAGAGTCGACAGTAAGTAATGCGGTC  
AGTTGCGAATTCGAGCCCTGCCGAGGGGAACCTTTTTTTATTAATTTATTTGGTGTGGAATANGAGGGTTCG  
GGGTATCCCCTAGTCAGGGGCTCCCGACTAGAACCTCTTACTTGTT  
>160\_rnd-4\_family-309\_\_LINE\_\_CR1  
GTGGTCCTGCTTTTTTTTTTAAATATTTTGAATTNTCCGTAAACACTTAATCTTTTCCGACCATTGNAANGA  
ATCGTATATTATTCCTTCCATNAGAAAGGTAGTAAGTCTAACGTCGAAAACCTATAGAGGTATTTCCAAATT  
ATCCGCTATACCTAAAGCTTTTAAAGAAATCGTAACATCTCAACTGCAACATTTATGTAGCTCTATTATTTT  
ACCNTCCCAGCAGGGTTCGTGAGGCAGATCTACAACCACTAACCTTCTTGACCTTACTTCGTTTGAAGNAA  
NTGATGGGTTTAAGAAGAGAACGCNGACTAGCGTCGTCTNTACTGATTTTCAGTAAAGCTTTTGGCTCTGTC  
AACCCTCCTTGCTGCTTCANAAATTATGCCTTCTCGGCTTCCCAGTCAATCTTTTGAAGTGGATTCAGAG  
CATTCGATGATAGANCCAAAAGGTTNTTTTTCAGAAATTCATGTTCTAAACGTATTCTACTGATTTCCGGTG  
TTCTCAAGACAGTCATCTTGGATCGTTACTCGTTACTCTTTTCTTACGGCCTTCCCTCGATANTGTCTCAC  
TCTCGAGTATTAATGTATGCTGAAGATGTANAGTGATGCCTTGCATATAAAAAATATGGCATCATGTTATCT

NTTACAAGCCGACATTGATGCCTTTCAGACTTGGTGTCTAGCCAACGTTTCTTACATCCTTAATNGCTTACC  
GCTCGAGCGTGTTAACAGTACTTCAAATGAAGTTACTGATCTAGGTGTCATCCTTGATCATAAACTTAAAN  
NCGANTCTCATGTTAAGACTGTGGTCAATAAAGGACGGAATNGTTTTGGGCTTCATCAAGCGATGNTCGAA  
GGAATTCGACACCGTACACGACAAANNCACCTTTATATATCTCTATCGGCCTATTCTTGAGTATGCCTCATN  
TNTCTGGTCGCCACAATAGCTTTCCATCAGGACAGAATTGAATCTGTACAGAAACAGTATTGCTGTTTGCC  
CTTCGTNGATTAAACTGGGATCCTGGTGTGCGGTTACCGTCATANTCCAGCAGACTTCNGATGATTAATCT  
TCCCTCTTTAATTAATCGTAGAACTATGCTTGGTGTAAATATTTATTCATAAGNTAATTACGGGCGAAATCG  
ACTCTTCTGNGTTGACTAGCCAATTAAACTTCTCTGTCCCTACTAGACTAACACTGTACACCTTTATCGCTT  
CNATTTTGTNACTAACTATGCCTTGCATGAACCGTTCAGGGTCTCTGTGATGATTATAACAAGCATT  
CAGAGTATTCTGCTCGGAGTCTTCCCTTCCTCGTATAAAGTCNTCTATTCTNAACTATACATTCATGTNAAT  
TTATTGTTCTTTGTCTCTTGGTGCTAGTG

>Ref\_dvir\_608

CTAGAAGCTAATTGACACGTACGACTGGCTCAGGCCTAACTAGACTATTACACCAGAGACTTTTCAACCTT  
CCGAAAAGAAGTTGCCTTCATGGAACAAACCAACTGCCAAAACCTTCCACTACCAACTGCACGAAGACACC  
CCTTTTCGCATTGTCATCAAACAGATGGCGTCTTCTGCGGCCTAAGGGCCCAAGGCCATATAATTGCAAGA  
TAAAGGACACAAGGTAGTAAATATCTATAACCCTAAAGGCAAGGCCACAAATGGCACGCAGCAAAGCAG  
GCTACATATGTGACATCAAACCGGCCCCCAACAATAAGGAAGCGCTGAAAATAAACCTTATATGCCGGCA  
AGAGTCTTAGTGCAGCGCCCCGCGGATCTGCTGACGTTATCCAATGCCACCGCTGCCAAGATTATGGACAT  
TCAAAGAATTACTGTATGAAGAAATTCGTCTGTGGTAGATGTGCTGAAGAGCACCCAACAGGATCTCCTC  
CTTGCAAAGCAGTCCAGGAAGCCGACTTCTTCTACGCCAACTGCGGCGGAAACCACTCTGCCAATTACAA  
AGGCTGTAAATGGTACATAGACCGAATCAAGGTACGCAAGCCGGCCCCCAATATCTCGGCTCCCTCCACA  
AGGCGCATATAACCACGCTCGGCAAAATAGGAATGCAATGCAATTTATCCCTCCTCCCATGGTAGCTGGC  
AAATCCGTATCATTTGCGGACATGCTCAGATCGGGCAACCAACAAACAGCCAGCGAAGAGACACCACCC  
AACGCATACCGGATGAAAAAGCGTACGAAAGGCAGCCCAACAACATTACCGGAAACCAACCGAGCGACG  
ATACTAACTCGAGAATTGCGGCTCTTGAAGAGGCTATGCTAAGCCTTACCTAAGAATGGACCAGATCCTT  
AATACACTTCATAAAAACTCCGAAACTCAGCACATCCTGATGTGCTAATTTCTCGCCTTATCCCATCAAA  
ATGAGCCAATTAAGGATCGGATTATGGAACGCGGATGGTCTTAATAGAAAAATCATTGACATAATGCTCC  
TAACGGAAACGCACATGCACATGTGCTCAAAAATATATGTCCCCGGTTATACTACATATATAACTCAACA  
TCCCTGCAACTACCGCAGAGGAGGTGCCGGCATCTTAATCCGCCATAGCCTGAGCCACCACCCCTGGAA  
CACATTTCCCAACCACATCTGCAGATGGCCGCAGTCAAGATAAACACTAACAGAGGAGACTTCACAATTG  
CTCTCTATACCTCCCGCCCGGCTGTGCCATGGACCAAAGCAAATTTTGAGTTCCTAATAATGAACTTAGGA  
CAAAAATTCATTGCCGGAGGGGACTGGAATGCGAA

>160\_rnd-5\_family-2104\_\_RC\_\_Helitron

AAGAACTGAGATACAATCAAATATTTAGTATAATTTCTGGATAGAATATCTCTTGGCACATTTNCGCAAT  
TTTATGTCGTTTGATTAAATATTTTATACCCTGAACCCATTAAAAATGTATGTAACAGGCAGAAGGAAGC  
ATCTCCGACCCCATAAAGTATATATATTCTTGATCAGCATCAATAGCCGAGTCGATCTAGCCATGTCCGTC  
CGTCCGTCCGTCCGTCCGTAAGAGCTAGAGACTTGAAATTTTAGATGTAGGTGCTCCTAGTGCCCGCGCAG  
ATCGAGTTTGTTCGATAATCGATAACTTACTCCGTTTCCAAGCAATCGATAAAAATCGATATCGACATC  
CTGTTTTTTGGGCAANTTNGGTAAATAATAAGAGCTAGAGTCACCAAACATGATATGTTGCTTCTAGAATA  
TTATATATNTGTCAAGTATCTTTTCAATTTTATACCTATCGCCACCTCCCCGCTACCACCCAGAGCTATAAAT  
CAAGTTAATAACCCAACCTTTTATTGCCAACCAATTTAAGCCANAATTTAAATGCAATTGACTTTTTTCAGNA  
TACACAAATATTCTATGGTACAATAAGATATACTGTAGAAAATTTCAATAAAGATCGGTTAAGAAAAAACC  
AAAGTTATATGCAACTGCGCAATTGAATGGGGCAGCANCTTTAAGAATTTCTGTATACATGTACANACAC  
ACATTCATGCGCGTCTGCTTCGCATTCTAACAGCATGGTNATTGCGACTTTTTTCTGTAATGCTATTTAAGT  
TCCTTTTTTATCATAAGTAATCGACAAAATGGCAAGGGGTACATCACGTTTTTTTTTCAAAATCGAGGTC  
GGTGCGAAAATCGAACTTTTTTCGATGATTTTTTTTTTAATATCTCGGGTAATAGCTCCGCGCGGAGATATG  
ACGTTCCAAAACGACATAACTCCGCGCGGAGATATGACGTTCCAAAACGACATAACTCCGCGCGGAGATA  
TGACGTTCCAAAACGACATAATATCCGGGTATAGCTCCGCGCGGAGATATGACGTTCCAAAACGACATAA  
CTCCCCGCGGAGATATGACGTTCCAAAACGACATAATATCTCGGGTAATAGCTCCGCGCGGAGATATGAC  
GTTCCAAAACGACATAACTCCGCGCGGAGATATGACGTTCCAAAACGACATAACTCCGCGCGGAGATATG  
ACGTTCCAAAACGACATAACTCCGCGCGGAGATATGACGTTCCGAAACGACATAACTCCGCGCGGAGATA  
TGACGTTCCGAAACGACATAACTCCGCGCGGAGATATGACGTTCCGAAACGACATAACTCCGCGCGGAGA  
TATGACGTTCCAAAACGACATAA

>9\_rnd-5\_family-8\_\_LTR\_\_Gypsy

TATTTTCTTTNTACTTTTGATCTCTCCTAAATATACTCAATGGCTACGAACAAAGCGATAGCTGAAGTTTAT  
TTACGAGACCCATATTATTAGGGAGAAAGAGTTCAGCAATTAGTAAGTCAACTCCAATAAGTATATACG  
CAAAAGGAATAGTATTAAATAACGCTCCCGGTATACAAGTGAAATCGGTAATTAAAGAACACCCAATACT  
AGGNAGAACGTTAGATTTTGTAGCATTAAAAAAACAACAACATTAGAACACCCTATTTTAGGACCCATC  
GACATTATTATTGTGCGTTTGCACAGATAAATTA AAAATGTCTATAAATGGAATGGACGCAAATCGTTACC  
ATTCTTAGGGAACAACGTGAGGAGTTTAATAAAATCTTTCAAGTGCCTTAACAAAAGCGCACCTGTCTCAA  
ACGAGACAAAGTTAAAACACGTTAAAATTCTTGTAGATTCTTACAATATCAGCCGTCAACTTATATGTGAC  
AATGCAACAAAACCTAAAAGATTTGCATTTAACACAGACAGTTGACGTATTAAGCACGTTAAGAGAAAAAC  
ATTAGACGAATTTGCGAAAGGCATAATATAACAATATTCCTTCCAAATTCTCTTAACACTTCAGCGTCATT  
CGACGAGAAACAACCTTTGTTGTCNAGCTGATATTAAACCATCAGATTCTGAAATAAATACCCATTCAATT  
GACAACACAATGGCCCAAACAGCTATAAGTTTTCTCAAACCTNGCCTCATCGCTCTTACCAGAGTTTGATGG  
CAAGGCAGAAAACTTACAAAGCTTCAAAGATGCTTTGAGTCTTATAGACTCACTAAAAGAAGATCATGAA  
GCAACAGCTGTCAGTCTTATAAAGACAAAACCTAAAAGGCCATGCACGAAACTTGATAAGCGATGAAAAA  
ACAATCGCCGAAATAATTGCAAAATTATCAAGAACGGTAAAAGGAGAATCAGTTGAAGTACTATCAGCTA  
AACTCCTAAGCCTACAGCAAAAGAGCAAAACTGCCAACACTTATACACAAGAAGTTGAGCAACTGGCAA  
AAGCTCTGGCAGGTGCTTATATTAATGATGGCTTAAATTCAGATTTAGCCACCAAATACAGCACAGCCCA  
AGCTGTAAAGGCCATGACCAAGAACTGCGCTATAGATAAGGTAAAACCTTATCATGCAGGCAGGCACATTC  
CATAACATGAATGATGCCATATCAAAGTTTGTGCGATAGTTGCACAGAAGCAACCCGGACAAACTAATACTG  
TCCTTTATTACCAAATTACTCTCATCGTGGTGGAACCCGCGGTAGAGGTAATTATAGAGGCCGACCATAC  
AACAGAGGCGGCTACAATAATAACAATAG

>Ref\_dvir\_805

AGTAAAATACTGACATTTACAGAGTTTGTCTAATACACTATATATTGGTGGTATAGTGTATTTGTCATAAG  
TCCTTACGTCGTTAAGATTTTCGATAGTCAATGACTATCCTAAATTTTTGTTTGCCGGATGCATCCCTCTTTT  
TGGGTATGATCCAAATTGGCGAACAGTAAGGGGATTTGACTTGCGAATTATCCCTTGTTTGATCATATCT  
TTGATCTGGTTTTTCGACTTCTTGGTTCGAATGTTTGGGCATATTTGTATGGTTTTTTATAAACCCGGATCTTCA  
TGTATGGTTTGGATGACATGTTTAACCGTACTTGTGAAGGTCAAATTTTCACCTTCTCGGTATTGAATATCA  
CCAAATTCATGTAAGATTTTTGTAGTTTACCTTTCTCTTCATCGTTTAGATGATCAAGGCGGAATTCGTTG  
AACTCTGAGAGTTCGTTGTTATGGCGAACACAAATTGTTTCGTCGGGGGCGGAACGAGTACTCAATTTTTGA  
CTCATTCGCTGGCAATTCGATTTCCGAATTGTTTTGCATGGTAAATGTATATTCATTTATCCGTATGGTTTT  
ATCTTTGTAATCTATTAGGGCTTGAGTACTCTCTAAGAAGTCTCTACCTAATAACACGTCATAATTTTGTGA  
AAAATTATGTAAATAAAAATTTCTGATTGGTGGGGCAAAGTTTGTCTGGGTTTCAGCGAAATACTTTTATTTA  
GTACTATTGTACCATTAATTGTTTGAACCTCCAATTGGCAAGTTCTTATGGGGAAATTTAGGAATTTTTCTT  
TCATTAAGTTAATAGACGACCCCGTGTCTATTACACATTTTAGGATTTTATTATTCATGGTTAGTTTGATAA  
AGGGGTTGGTTCTTCTTCGGTTTTCTGACTCCGAGGCAGTTTGAAGAAAATTTTCGGACGTGTCCATTTTCTT  
TGACCACTACCGCTTTGCGTTTCCTTTTTGTTGGCGGATTGGGGGCGGATAAATGTTTTTGGTGATTTTGGT  
AATTAAGAGGGTTTTGTGCCGCTTTGTTTAGATTTTGACTAAACTCTAAGTTTATCTGTGGACTACAGTCA  
ACTTGTGATTTGGTTTTTTGTATAGTGTACTATAGTGTGTTGTTTGTGTTGATTGATTATAATTTGGAGTTT  
TCCCGTATTCAGTGTACCTCGATTTTGTGTTGGAAGTAGCTGGATTGGTTTCATTGCTTGGGTTTTTATTCT  
ATCGGATAATGCTGCATCATAGACGCCTTCTCTCTGAGCTACCTGTTTTAATTTTGAAACTGTCGTTATATC  
ATGACGAGCTAATAACAACAAAGAACCCACCGGACATGTCCCCCAATAATAACGCATT

>9\_rnd-4\_family-27\_\_Unknown

CCATTGAGTAATAAAGAGAGAAAGAGCGGCGTTTGATCAAAAGCTCTTTTTTCAGAAATACTTCCTGAGCGAA  
AACGAGGTTGCAAACAACCTTCAAAACATTTTCCATAAGAACCAACAACAACCATAATCAAAACAACGA  
CTCGACAATGAAAAAGCACACCACAAATTCTGTCTTGCTATCCCTTTTTGTTTGAGGCTACAGCCTATGA  
TCTTAGCTTCTGCACCCTTCTAACTCATTTGTTGTGGTTTCTAAGCACTGCTATGCCTATAATTCGCAAAGTC  
ATGTCTTCTTCTTCTCCACTCGCTTTCAACTTGCAAGCAGCTCGGCAGATTTTTATAATTTTTTCATTTTTTCGA  
CCAGCAAGGCACCCTTTCTCAAAAATAGGGTATTTTAACTATTCATAAGCGATGTAACCAAATAGCACAA  
ACCNTCTTATATATACATTTTTATCCAATGTCTATGAAAAATATAATTTTCGTATTTAGTGTGCAACTATTAG  
TACAGTCAATAATAATTGTTTTTTTANAAATTATATAACCATTCTTATAAAAAAAGGGTATCAATGCCGCGAC  
CCGCCAAATAGTTGTTGTATGTGTGTCTCATCTCACACATATTGGTGCAAATCTGCATATATGTATGTGTCT  
GCCAAGCCAAGGGAAGTCTATGAATTTAAGAAGATTGCAACGTTCTGTTGCGCATGTGACGTCACAGTCC  
AAGGCTTTTTATGTGCGATCATTTTCGTATATAAAAATTATTACATATGTCAACAAATTATTTACTATAAAA  
GACCCCATTCATAAGTTATTTAAATGTACNTAATAAAGGTAGAAATATATACTAAACATCACAAGAAATA  
AAATTCTATTAAGTGTGACGTCATAATATATGATGTTGGGCGCCGTGCGCGTAACCCTTTGATCTGAATGC

CATGGCTTGCTGGCATTTCGAATTTTCTACCTACTTGCGCCGAGACTCGGCTCTGCAACAACAACATTAGTA  
CCCGAATTGTGCTGTTGTTGTTTCTACGCGCTGCCTTGTAGGAACGACAGAGAAACCCGCAAAGAACA  
GTGGCATTATTTGTCCCTTTTCTTTGCACTGAGTTTCTATGTCCTCATCATGGCTCACAAACCTCTTGTG  
ATCAAAACGGGGGATGAAGAACAATTGGGTTTCGTGCGCACTGTTGTTGTTTTGCAAGTGATTTGTTGTT  
GCTTCCTATGGTAAATGAGCTTTTTTATTGGGTNTGATTTTTCGCTTTGCGGACCAACTCGATCTACGACTCG  
TGGTTTTTAAAACGGTAAAAAAGCTCAGAGCGTCAGTTCAGCTCTTTCTCTTTATTACTCAATG  
>Ref\_dvir\_5  
GCCAAAAATGTTTCAGATTTATGCAAATTCATTAGAGGGGAAAACCATGAAAAAAAGCCAAACCTCTGAAA  
ATCGGATGAGATTTTGACCGAGTTATGGGGGTGGGAAATTTTGACCATGTCTATATAGGAAATTTGGGGG  
TAAGATTTTGACATGAATTTTCGACCAAAAATTATGTTGTTTCAGATTTAAATGCCAAATTAATCTAGAGGCA  
AAACCATGAACAAAAAGCCAAACCTCGTGAAAATCGGATGAGATTTGACCGAGTTATGGGGGTGGGAAA  
TTTTGACCCATGTCTATCTATAGGATATTTGTCAAGTAGGGTAAGATTTTGACATGAATTTTCGACCAAAA  
TTATGTTGTCAGATTTAAATGCCAAATTGATCTAGAGGCCAAACCATGAACAAAAAGCCAAACCTCGTGA  
AAATCGGATGAGATTTGACCGAGTTATGGGGGTGGGAAATTTTGACCCATGTCTAATATAGGAATATTTG  
ACCAAGTCCGGGTAAAGATTTTGACATGAATTTTCGACCAAAAATTATGTTGTCAGATTTAAATGCCAAATTA  
ATCTAGAGGCCAAAACCATGAACAAAAAGCCAAACCTCGTGAAAATCGGATGAGATTTGACCGAGTTATG  
GGGGTGGGAAATTTTGACCCATGTCTATATAGGATCTATTTGGGGGTAAAGATTTTGACATGAATTTTCGACC  
AAAAATTATGTTGTCAGATTTAAATGCCAAATTAATCTAGAGGCCAAACCATGAACAAAAAGCCAAACCT  
CGTGAAAATCGGATTGAGATTTGACCGAGTTATGGGGGTGGGAAATTTTGACCCATGTTCTATATATAG  
AATCTGAGGGTAAGATTTTGACATGAATTTTCGACCAAAAAAAGGTTGTCAGATTTAAATGCCAAATTT  
AATCTAGAGGGCAAACCATGAACAAAAAGCCAAACCTCGTGAAAATCGGTTGAGTTTGGACCGAGTTATG  
GGGGTGGGAAATTTTGACCTATTCTAGTCTATATAATGATAGTCATTGGATATTTGAGGGGTACCATTTTG  
ACATGAATTTTGACCAAAAAATAATGTTGCCAGATTTAAATGCCAAATTGATCTAGAGGCCAAACCATGAA  
CAAAAAGCCAAACCTCGTGAAAATCGGTTGAGTTTGGACCGAGTTATGGGGGTGGGAAATTTATGCCATT  
TGACCTATGTCTATATAGGATTGAGGGTATTGGATTGGATTACATGAATTTGACCAAAAAAGTTCAGATT  
TAATGCCAATTATTAGAGGCCAAACCATGAAAAAACCACCTCGTGAAAATCGGTTGAGTTTGGACCG  
AGTTATGGG  
>Ref\_dvir\_697  
TTTTTATTA AAAAGTTTTGGGCATATTTTACTAATCACCGTCACTGGAAGTGTATTGTTATTGCTTTCAAT  
TGTGAGAATCAGAGTGATGAGTATTCGTTCTATCAAATTATCTATGATGAAATCAACAATGTCCTCAAGCT  
CGTATGATCCTACAGGTATCTCAAACGTATGTTGCCCAAAATGAAATAGATGATTAGTCCGATCAACATTT  
GGAATTGAATTGTACATATGAATACAACCTAGACAGCATTCTGTAATCTTTTGACAATTCAATGGAAGGAAA  
GCAATAAGTATGCAGTTAAAATTGCCCTTTCCCAGTTAAAGTTATTGTTGTTACCATTTTGAGAAACGAA  
TGTTAAATGAATCAAAATTTATTTTTTTACAGTTTTATACTAGAACTTTATTATAATGAATTATTTAAATTA  
TAATGAAATGTATCAAATCCTATTCTATATCTTCCATTGTCTATTGCATCATCCTTGCTAATCAAAAGAAAT  
CCATATTTATTTTCCAACATAATTGACAAATTTTCATAAATGTTTCGAATTCATATCGACACCCACATGAT  
CTTGATAAATGTGCTTCATATTAAGTTGATCTTGATTGAATATTATTATTAAATTGGCATTATCGCGCACAA  
GATGCTTTGGTATGCGTGTATACGTTTGGCATAAATAAAATGAGTCAATGTTTTTATGTCGACCCATGCAA  
AAGTATGAACGTATATTATCTTGTTTTTCACATGCTACATCATCAAATAGCATTATCGAACTATCCTTAGCT  
TTCTCAGGTGATAACACCTTCGTTCTCAGAAAACGTGAAGTACCCTATTCCCTTTTATGGGAGTGACAAGAT  
TTTTTAAGTATTCATATTTTCGGTTGAAATAATGATTTTGAGTATAAGTAAATATTTTTAAATTTTAATCCAT  
TTGGACTCTCTATTAAGCTGATCATGAGATTTGTCTTTCCGCAATTAGATGTACCTACAATTAATCCTCTAA  
TTGAGTTTGATAATAGCACACTGTGTCTAATATTAGTTTTACTGGGCGAAAAATCAATATTTCTCACTTCTA  
TATCTTTTTTTGTTTCTTTAAATGCATATTTAATGATTTTATTCTCGCAAATGAATATCCTTCACTGCTATA  
CCTTTAACGATTAAGTATCAATTAACCTGCCATTTATTTTTATAAAAGATTCAGTCGTAAACCAAACGCC  
TATTGTGGAGGTAGCTAGTTATAAAATAATAATAGCCTTCCGAGTGAATTCGCCAGCGGGGTGAAAAAGG  
TATTAACCCCTTTAGACGCAGCTTGCAGGGAGCACGATATAGCATATTCAG  
>Ref\_dvir\_915  
CTGCGACTTTCCGACACTAGCTTGTGTTTCAGCATGCCTTGAGGCAGGAGTTCCTTGCAACGAAATTTTGGC  
ATTGTAAAAATTTTGTAACCTGACATTACAAATACCAATGAACAGCTGGAAATTGTTAATGTCGAACACAA  
CCGCGCCACAGGGCTGCGCAGGAAAACGCCAAGCAAATTCCTCGCGACTACTATTTCCCAACATGTCA  
AAAGTGGCCAGCGAAGTCGTCGCGAATTGCAAAGTCTGCAATAAAGCCAAATACGATCGCCACCCCAAG  
CGACAGGAGTTAGGAAGCACCCCAATTCCTTCATATGTAGGGGAGATGTTACATATTGACATTTTTTCTAC  
CGACAAAAAGATCTTCCTAACTTGCATCGATAAGTTCTCAAAGTTCGCCATCGTACAGCCCTTATCTTCTA

GGGCAATAGTTGATGTACGGGGCCCTATACTCCAATTGGTAAATTTCTACCACAAAACCTAAAACCATCTAT  
TGTGACAATGAGGCTTCCTTCAATTCTGAAACGATTACGTCTTTGCTGAAAAACCAATACAGCATCGATGT  
CATTAATGCGCCACCGCTTCACAGTAGCTCCAATGGCCAAGTGGAAAGATTCCACAGTACCTGGCAGAAA  
TAGCCAGGTGCCTCAAAATCGATAAAAAAAAAATTGACGACACTGTGGAATTAATTTTTCGGGGCTACAGTA  
GAATATAATAGATCGTTGCACTCAGTCACGGATTGTAGGCCAGCGGAAGTTATCCATGCCAGCAGCGACG  
AGGTTAACTCGGCTATTAGAGCCAAGATTGACAAGGCGCAACAAACCAACCTCGATAGAATCAACACTTC  
AAGACAAAACAGAGTCTTTGAAGTTGGGGAAAAGGTCCTCGTGCGCAATAATAAAAGACTCGGAAATAA  
GCTGACGCCGCTCTACTCAGAAGAGCGCATAGAAGCAGACCTAAAAACGTCTGTTCTCATTAAAGGGAGG  
GTGGTCCATAAGGACAATATAAAATAAACACCTCCGCCATCCATACTCGCCCTTATGTTATTCAGAACTCA  
ACATTACTACAATCTCCACAGGCTTGCCGTTATACTCATCTTACTGCTGTCCATAGCGAATGCGAGAATTA  
CCGACTTCTCTCACGCGAAGAATATTCCGGTACTGGACGGGAATGTCCTGGTGTGGGAACAATATGGCCT  
AGTTAGGCACTCGACAAATTTGTCTGAGTTCTCCAGCATAATTGACTCTACGGTCAGAATGCTGGAGCTGT  
TCCCACAGTCGCATATGAGGAAGTTATTGGAAGTGGACGTCGATCATGCCCCAGAACATTCTGG  
>160\_rnd-1\_family-131\_\_Unknown  
TATCTATGCCATACGCTTGCAAGCTCCGACGANTCCTGTGTCCAACAAATCGAATGATCCAGGGGGTTATCC  
AGGCAGCNTACGAGATATAAAACCGCTNTCACATCTTACTCAAATGCGGTTGCTTGGTTGCAATTAATATT  
TNAAATTTAACGGCCGCCAAATTCCATTCGGCATGTGCGGCTGNGTCGCGAAATTTGAACNAAATTCAGCT  
GAAGTACCAGGCGAACAGAAATGCCAGCAGGTAGACAAAAGTCCGCGACACCAGAACAAAATTCGATT  
GCGCGCCGGCGCGCCATTGGTCAAGCGCAAATCCATGATGGCTGCTCGGCGAAATATGTAAGTGTAACTA  
TCCTTTTGCTTTGATTTCCTATGCATATTCGTCAATATATAGTGATGCGCAAGCACGCAAGTGATGCGGCGG  
ATTTGGCTGAATAATGCGATATCCGCTAAAACTAGCCATTTATTTTGGCGGATGTCTGCANATNTATTAAA  
TTGAGTTCCTATCNTGGGCAGATGATTATTTTGGACTCGCGAGAGTATTTTAATTTTATTAAATACTGTCA  
AATTTTAAATTGGAATTTTNTTGCCAATCGGACATTTTATCCGCATGTGTCAACTAACTATATATTTTCT  
CGATCGGCGTATATTTATTCTATATTTAGCTTTATTTGGCATGCATATACACATATTTCTTATAATAACAT  
ATAGAGTGAAGGAAGATATGTCCNACTTGAGAAAATAGCTATATNCATATGGTTATGTCATACGCTTGCA  
AACTCCGTCCCGTGCCTAACAGATCGAATGATCCAGGGGTTATCCAGACAGCGTACGAGATATNAAACCG  
CTATCGCATCTNACCCAAATGCGGTTGCTTGGTTGCAATTAATATATTCAAATTTAACGGCCGCCAAATTC  
CATTCGGCATGTGCGGCTGTGTCAAAAATTNGAACCAAAATTCAGCTGAATTACCAGGCGAACAGAAATGT  
CCAGCAGGTAGCCAAAAGTCCGCGACACCAGAACAAAATTAGATTGTGCGCCGGCGCGCCATTGGTCAA  
GCGCAAATCCATGATGGCTGCTCGGCGAAATATGTAAGTGTAACTATCCTTTTGCTTTGATTCCCTATGCAT  
ATTCGTCAATATATAGTGATGCGCAAGCACGCAAGTGATGCGCCGGATTTGGCTGAATAATGCGATATCC  
GCTAAAACTAGCCGTTTATTTTGGCGGATGCCNGCAAGTNTAGTAAATTGAGTCCGATCTTGGGCAGATG  
ATATTTTGGACTCGTGAGAGTATTTAAATTNTATNNAATACGTTTGCAAAATT  
>160\_rnd-5\_family-1379\_\_LTR\_\_Gypsy  
TAACCAAGAACAGGGTATAATTAATAATTTTCAATTAATAAAATTATAAAAATAACATTTACAAAACATTAAC  
GTAGAACATAATGAAATTCACCTACTTCAGTATATAACAAGAATAAATTTTAATATAGATGTATTATACAA  
CCACATAGATAATATAGCAGAAAGATATTCTGCTAACCAAATTGAATATAATACCCAAATTCATACTATC  
CGAAAAAGAAATTAGATTTATAAACGAATTCATTTCAAGCCAAAATGTCTTAGTAGAATCCGATGAACAC  
TTATATAGATTGTTAACATTAGAACTTACATAAATAACTTTAATATAACGTTCCATGTAAAAATTCCGAT  
ATTTAACAAACAAGNATATAAATTAGCACACATTGTCCCCCTACCGTTAGACCACACTAAATTCCTGATAG  
TACCAAACCTACATCTTGTACGACCAAAACGGTCAAATCTTGTACCTTGAAAACAAATGTCCCAAAGTCCA  
TCAGACATTTATATGCGAAAACGCATCTACACAAACGAACCTTAGTCAATATCCACCGCCTTAAGGGCATT  
CTCTTTGACCAAACGGCAACATGCGACATCAAGGATGTGCGCCGTCAAGAGGTCATCAGAGAAGTGGAAC  
GACGACACATCTTCGTCTTTAACACCATNAACACCAATGTACGTCCTTCATGTACAGACCCTTATCATAC  
GATGATACTGTAATGGAGTTCGAACAAAGGACAGAAGTGTCCATAGAATCGTTCAAACAAACGAACATA  
AACAAACACGTTTCGAAGATTTAAATCTGCAAAAACCTCCATTTACAGACATTATCAAGCCGAAACGACCTAA  
TTGTGCGGAAGACGACAGCGACACCTTTTCACACTTTATATACTGCTNACTATATTGACAATATCTGCAAT  
ATGCGTCTTGACACTCGGCGGAGCCTCCAGCGACGTGCGTTCCGGCCATTCCATCGATGTGGCCATCACTT  
CATTCAGGGGGGGGAGGAGTTACCGAATATACCATACAGGGAGAAACGGCGGCGGCAGCACAGCATTGT  
GACACTATGTTGCAATGCTGATCCAGCACTTTAACAGGATGTTGGTTGCGACAGTTCTCGTGCAAGACACT  
TGAAGTGTGCAACGGCAATTTGTCAGATACATGTTGCTAGCTTTTAAGAAAACCATTTGTATACATTTAGC  
TTTACTGAAGCTCGAACATAAAATAGATATTCAGTTCAGTTTGGAACATTCAAAGAAAACGTTGCAGTGTT  
TATTGAATTCTTATTTTCAATTTACATCAAATCAACATATATATATA  
>9\_rnd-1\_family-65\_\_DNA\_\_P

ACCAAAGACAATATAAACACTAAGATGAGTAACGCCCATACATTTGAATGCGACGCAAAATTTCTAGCCT  
GGCCTTTCATCTGGCCTTTGAGGCTTCGTACGGCATGCCTGCCGACTGGTTGTTTCGTTCTCCAAAGACCAG  
ACGAACGAATGCCGAAGTCGCGGCTTGCTGATGCTGACACGAGCTACGAAGTTAGTCGCCAGCCTGCCTT  
CAGCAAAGCTGGTCGATGCTGCTTTGCGTCGCTTCGTTTTCGAAGTACATTGAGCGAAAAAGTTTAGAACT  
TACGATCGACGCAAAGTGCTTGTGCTTTATCCATGAAATGCATGCTTTATTTAAATGATATATTACCCTAG  
ATATTAACGATTAATTTTACAGGAAAATTTAAGAAGTTATATAATTTTACACAAGGCGCTTCTTGCGCAA  
TAACTATGTTAAGAAAATAGCACACATAGATTGATTTCACTTTTCTTTTTGGACAGTGTATGCTCGAGAAA  
AGTTCTTGTCTCAGCCAATAGCGTGCGTGACCTTTTCGTTGTATGCGTGAATTATACATGCATAAGAAGTT  
TAAAGTATGTATGTATGTGTTGTTATTCAGTCTGCTCTGGCTTTAGCTGGCAAGAAATTAATTTTGTAGTTTT  
CTAGCGCAGATCATGACCTATCCCAAATTTGTGTTGATATATGAATGCATTTTGTGTACTGAGGTTGGCTC  
CGCAGAAAATACCCGAAGGTCATATTTAGTTATGACCCCATTAATAATTATAATGGTCTCCTCGCGGTGTTT  
CCTGCGTACTTTGTTCTTTATAATTCGAACAACAAAAATAATAAAATNAAAAAATTAATTAATGTATCC  
TTNAAAAAATAATAATTTAATTAATAATTTCAAATATAAAAAATTACGTAAATATTTGCATCGACTTAAAA  
ATACAAATTTTTTTGTACGGAGCCAACCTCAGTTACACAAAATGCATTCATATATCAACAGAAATTTTGGG  
TAGGTCGTGATCTGCGCTAAAAAACTAAGAAAATTGTTTCTTTGCCAGCCAGAGACTTTGCCAGAGCAGT  
GGATAACAACACATTCAAATATGCTGTTATGTATGTATATTCACACGCATACAAACATAATTGCTTGCACG  
GCCCTCATAGAGCCGAAGCTGAGAGCAAATTCTATTTTTAGCTTTTTTCGTTCTCTCGGCTGTGAGAGCGCA  
ATGCTACAGATTTTCGTTTTTCGTTCTCAATTTTCAAAAAATCAAGCTGCATAGTAGCATTTTGTGTTATGGCG  
TTACTCATCTTAGTGTTTATATTGTCTTTGG

>9\_rnd-5\_family-3463\_\_DNA\_\_TcMar-Tc1

CCAGTTAGTCTATTTTAATCACCAATTGGGTAAAAGTGCGCAGGAATTGTCAGAAATGTTTCCTGTAACCC  
GCAAGACCATTTATAATATTATAAATCGCGCTGAAAACGAGGGAAGATTGGAGCNAAAGAAAGGAGCCG  
GTCGGAAGCAAAAAATAAATAAACGAGCGGAGCGCGCATTGGTAAGAAAAGTGGACCAAAATCCGATGN  
TTTCGACGAGAACTTCTTGCAAGAGANCTNAAGGAAGAGTTGGATCTGGATGTATCCACGAAACTGTAC  
GTCAGGCCATACTACGACGNGAGTACAAATCAAGAGCTGCTCGCAAGAAAACCAATGCTCTCTGATGTTA  
ATGTTGGAAAACGNTTGTCTTTGCCACAATGTACCACAATCAACCTGCCGAATATTGGGATGACGTCATC  
TTCTGCGATGAGACGAAAATGATGCTATATTATAATGATGGGCCAACAAGGGTGTGGCGTAAGCCCTTAA  
CATCTTTAGAAAACCGAAACATCATTCCGACAGTCAAATTTGGCAAAGTGTCCATAATGATTTGGGGGTG  
CATCTCAAGCCAAGGAGTCGGAGATTTGGCTTTTTATTGAAAACACGATGGACGCACAACAATATTTAAGC  
ATTTTAAAGAACCAGTTGACAAGCAGCGCGAATAAATTTGGGTTTATAAACAATAATATGCCGAATTTTA  
AATTTTATCAGGACAACGACCCAAAGCATAAGGCGCATATGATACGCTTGTGGTTACTTTATAACTGCGGT  
AAAGTCTTCGATACACCTGCGCAAAGTCCTGATCTCAATCCCATCGAAAATGTNTGGGCTTTGTTAAAGAA  
AAGAGTGGCTAAAAGGCATCCGAAGAACCGAACAGCACTNAAAAGTCTATACTAGAAGAGTGGCAGCA  
GTTGCCGAGCCATTATGATTTTAAAAGCTTATTCATTCAATGAAAAGCGCCTGNACGAAGTCATTAATGCC  
AATGGTGGCCATACAAAATATTAATATAAGAAAAATATGCNATTTCAAGTGCCTTAAATTAATTTAATTAT  
TACTTATGCCAAATGTGTAAACAATTGTTTGACAACGAAAAAACCAGCTATTTTTTGTTTTTGTATTATTTT  
TCACATATCATTCTACTTTCTATTACTATTTTTATGAATTCTATTAGTAAATACTATAAGCAACTATAATAA  
ATTNAAAAAATAATTTTACAATATTTGAAAGTATTTATTTTTTGCTAAGAAAGTCGAAAAATCATTTTTTT  
TTCTAATGTGAAAACAATTTCTTGACATACTGTATGTTA

>Ref\_dvir.14.34.centroid

CCAAAGACAATATAAACACTAAGATGAGTAACGTCCATACATTTGAATGCGACGCAAAATTTCTGGCCTG  
GCCTTTCATCTGGCCTCTGAGGCTTCGTACGGCATGCCTGCCGACTGGTTGTTTCGTTCTTCAAAGACCAGA  
CGAACGAATGCCGAAGTCGCGGCTTGCTGATGCTGGACACGAGCTACGAAGTTAGTCGCCAGCCTGCCTT  
CAGCAAAGCTGGTCGATGCTGCTTTGCGTCGCTTCGTTTTCGAAGTACATTGAGCGAAAAAGCTTAGCACT  
AACGATCGACGCAAAGTGATTGTGCTTTATTAATGACATGCATGCTTTATTTAAATGATTTATTACCCTAG  
ATATTAACGATTAATTTTACAGGAAAGTTTAAGAAGTTATATAACTTTTACACAAGGCGCTTCTTGCGCAA  
TAACTATTTTAAGAAAATAGCGCACATAGATTGATTTCACTTTTCTTTTTGGACAGTGTATGCCCAGAGAAA  
AGTTCTTGTCTCAGCCAATAGCATGCGTGACCTTTTCGTTGTATGCGTGAATTATACATGCATAAGATCTTT  
AAAGTATGTATGTATGTGTTGTTATTCAGTCTGCTCTGGCTTTAGCTGGCAAGAAATTAATTTTGTAGTTTTT  
TAGCGCAGATCATGACCTATCCCAAATTTGTGTTGATATATGAATGCATTTTGTGTACTGAGGTTGGCTC  
CGCAGAAAATACCCGAAGGTCATATTTAGTTATGACCCCATTAATAATTATAATAGTCTCCTCGCGGTGTTT  
CCTGCGTACTTTGTTATTTTTTAATTCGAACAACAAAAATAATAATAAAAAAATAAATAATTAAGTTT  
TTTTGAAAAAATAATACTTTAATTAATAATTTCAAATATAACAAATTACATAAATATTTGCATCGACTTAA  
AAATACAATTTTTTTTTGTACGGAGTACACAAAATGCATTCATATATCAACAGAAATTTTGGGTAGGTTGTG

ATCTGCGCTAAAAAACTAAGAAAATTGTTTCTTTGCCAGCCAGCCAGAGACTTTGTCAGAGCAGTGGATA  
ACAACACATTCAAATATGCTGTTATGTATGTATATTACACACGCATACAAACATAATTGCTTGCACAGCCGT  
CACAGAGCCAAAGCTGAGACCAAATTCTATTTTTAGCTTTTTTCGTTCTCTCGGCTGTGAGAGCGCAATGCT  
ATTGATTTTCGTTTTCTTTCTCAATTTTCAAAAAAATCAAGCTGCATAGTAGCATTTTGTGTATGGCGTTAC  
TCATCTTAGTGTTTATATTTTCTTTG

>Ref\_dvir\_572

AGGGTAGAATGCCTCAGCATATATTATTAGATTGCTGCATCTGCTAAGAAAACACCTCATATCAATCGGTC  
ATGACCGCTTTTTGGGTTGTTTGGGAGTCAAAATACTTTATATGCAAATGATATATTGTTACTGAAGCCTA  
GCACTTTTTATCAGAGTGAGGAGATCACTACAGCACCCCTAACATATAAATCATATTAGTGTTCTGGATATA  
GGCAAAAAAGAGAGCCAATCTCCCGCGATAAGAGGGGAAAGTATAGAAAACAAATACAGAATCGATTTTCG  
AGCAGACCTCAAAGAAAGCAGGGAACCACCACAATGTAGGCTGACTTTAGCACAGATTAGAAGTAATCA  
CCCGCAATAATAAACGCTACGCCGATTTTCTGGATTAGCGGTGAAAGATTTTAAGCAATTTGTTGATAATA  
TTAAATCTTAAAATTGTACCTAAATCTCTGTAAAACAAAAAGAAGAATATTAATCCACCAAATGCGAAAC  
TAAGGGAGAGCCAAGGTTTGAAGCTTTTTATTGATTATAGTAGATCGCTCAAAAAGACTCTCGAATAAAC  
TTCAGGCAAGAGAGCCATGACAAAACCGTGCCGGAGGTAGCCGACAGTGCATCGTCGTCAGTGAGGTGT  
AGCCGCACCACTAACTCAGGTTGTAATTTTCCCTCGTAGTGCTATTTCTCCTGACTGTCCTAGCGGACTGG  
CTGAACGCACTGTTGCCGCATCTAACACCATGGAAAGTTAAAATTCTGGAGGCACTACCAGAGGAAATAA  
ATACCCGGACTCACATTTTTGCCAGCTACTGCCCAGCGTCTGAAAAGGACAAGAAGACCTTTCGACTGTTA  
ATTAACGAGTTCTCTACAGAGAGCAGAGGCTGTTACAATCGCCATGGGCCTGCTAAGAAACCAGAAATTA  
ATATTTGAACTTTGCTTGGGTAAAAAAGACTGCAGCACAGTGTGGCGAGCTCCGTCGCCGAAAAGGCGCT  
TATATTAAATAAACGAGTCGCTTATACAGCCCTTGTATATATATGAAATCAATTTTCCACTGGAATCACTT  
TGCCCAAAATTCAAGCAACAAATTTGAGACCCATTAAAGGTGCACACAAAAGATCCGGACGGTTAATCGA  
TATATCCCCTGGTGAATAACACTACAACATTCTATAACCTCTATAACAAAGATCTAAGAAGAACCCTG  
TGGAAGAATCAAAGGCAATTGACAGATATTGCTCAAAAGGGATATGTACACTTAAGAAGCCAGAAGGT  
AAACAAATGAAGGCAAACCTGCTGGAACTCATTTTCCGG

>Ref\_dvir\_1027

ATTATATATGTGCGAAAATTGTTCAAATTACCTAAACGTGGAAGTCCTATCGTAAATCAATTTTTAATCTA  
TGTAACAAATTAATAATATGTTGTTTTATGTTTTAATATTATTTTATTTAATATTATTTACATTTATGACAG  
AAGCGCAAATACATTTAGTTGTATATTTCGCAAAATAAATATCTACACTTACGCATAAGTATATATGCTTTT  
AGTTATACAACCTGTAATATGAAACTATTGTATTATTGATTCGATAAATGATCTTTTGCATTCAAATGTCGCT  
GAAAGTGCGCGCAATGAAAATATTAATTGAACTTTGAAAGGGAGCTATTGTCAGGCGAGACAAACGAAA  
TTGCCATTCACTTTTCAACCAACCATCTATTTGTGCGGTCGTCGATTCTCGATTGCGATTACAGCGGAACAA  
CACGAGAGCCTTTAGAGAGAGTCTCGCAAAATGCTCACAAAGAGCTCGCATGTGAGCAGAAAACGAATG  
GGATATTTTTCTTTTTTCGCTAATCACTTGCACACGAGCGTTGCAGTCAGATCCTTGCGATAAAAATGCGTG  
TACAGTAGAGAGAAGTTTTTGTTCAAAAGTTAATTGTGTTTCAGAGAGTAAAACATTGTCATGAGAACGA  
GAGATAAAAACGACGTGGCATTTCGGATGCTGTGTTGTTTTGTTATTTTTTCTACTCAGACCATTTTTTGA  
TGGTTGAAAAATTCCCTTGTTCTCTTTGCTAGAGAGCTAAGTCTTTAACAAGTGTAATTA AAAA ACTAAAC  
TATTCCTTTCAGAGAATAATTAAATCATTTTTTTCGACCATTTGTCTGTGAATTATCGGAATTGATCACAG  
AGGGGCATGATATTTTCGAGATACGCAATTCAAATATCTATTAGATCATTTATTTGCGATGCGCCGGCCCG  
CGCCTTCATTTGGGTGTGAAATACCACTCTGAGTTTTCTCATGCAACTATTGCGGTGAGAAGGGAGAAAC  
TCTTAACAGGGCAAGTAAAATCATGTAATCCTCCAATCAACCAAAGCACCACAAAATACAAAGCAAATTC  
ATTCCTGAAAATTTGTGATTGATTTTGTACATCAGTTTCCACTAGATTATATGCACGTAGTTTGTCTTGGCG  
TGACAAAATCAGTTTTAGTGGGTTTAGTGAGAGGACATTCCTTTTCTTTGAAAAGACAGTAACTAACCTCG  
CTTAATAATAAACCAATACGCATCTTACCAAGAGAATTCAATAGAGAAGTTAGATCTCTAGACAATCTGG  
ACAGATGTAAGGCAACGGAGTTT

>Ref\_dvir\_356

CATTGAGTAATAAAGAGAAAGAGCAGGCGTTTGGATCAAAAGCTCTTTTTAGAAATACTTCCTGAGCGAA  
AACGAGGTTGCAAACAAAAATTGCAAACACAACACCCAGCTGTCTGCAGCTACTTCTGCCGATGCCACACA  
ATTCAATGACAACCTTCAAACATTTTCCATAAGAACCAACAACAACCATAATCAAAAACAAACGACTCGAC  
AGTGAAAAAAGCATACCACAAATTCTGTCCTTGCTATCCCTTTTTGTTTGGAGGCTACAGTCTATGATCTTA  
GCTTCTGCACCTTCTAACTCATTGTTGTGGTTTCTAAGCACTGCTATGCCTATAATTGCAAAGAAAGTC  
ATGTCTTCTTCTTCTCCACTCGCTTTCACTTTGCAAGCAGATCGGCAGATTTTTATATAAATTTTTCATTTT  
TCATAAGGACCAGCAAGGCACCTTTTCTCAAAAAAGGGTATTTTAACTATTCATAAGCGGATGTAACCAA  
ATAGCACAAACCTTCTTATATATACATTTTTATTTAATGTCTAAAAAAAATAATTTTGTATTTAGCAATTA

TTAAATAATTTCTATAAAATTATTTTCTATAAAAATACCTAATTAACCATTTTTTATAAAAAATGAGTATCAATGC  
CGCAACGCCAAATAGTTGTTTATGTGTCTCATCTCACACATATTGGAATCTGCATATGTATGTGTCTGCCA  
AGCCAAGGGAATCTATGAATTTAAGAAGATTGCAACATTCTGTTGCGCATGTGACGTACAGTCCAAGGC  
TTTTTATGTGCGATCATTTTCGTATTTAAAATGATTACATATGTCAATCAATTATTTACTATAAAAAGACCCTA  
TTCATAAATTATTTAAATGTACATAATAAAGGTAGAAATATATACTAAACATCACAAGAAATAAAATTCT  
ATAAACTGTGACGTCATAATATATTATGTTAACGCGCCGTGCGCGTAACCCCTTTGATTTGAATGCCATGGC  
CTGCTGGCATTCAAATTTTCTACCTACTTGCGCCGAGACTCGGCTCTACAACAACAACATTAGTACCCAAA  
TTGTGCTGTTGTTGTTTCTACGCGCTGCCTTGTAGGAACGACAGAGAAACCCGCAAAGAAGTCTATGGTA  
AATGAGCTTTTCTTTGGATTTTGATTTTGCGTTTGCGGACCAGCCCGATCTATGTCTCGTGGTTTTTAAAC  
GGTAAAAAAAGCTCAGAGTGTCTAGTTTAGCTCTTTCTCTTTATTTCTCAATG

>Ref\_dvir\_401

CTCCCCCGGGTAGCCCCCCCCCTTTTTTGGCCCCCTTATCGGGGCTTTATTTGTGCCCGGAAATATACCCAT  
TTAAAAGTTTTCGGGTTATGTCTTTTGAAGCGACAACCTCCGCCGATCTAAAAAAATCATGGAGATATGACG  
CCCTATCGGGGCTTTATTTGGCCGAGTTATGTCTGTTTTGAAGCGACATTCCGCCGATCTAAAAAAATCATGG  
AGATATGACGTTTCAAAGCGACATAACTTCGCCGTCGATCTTGGCGGATTCTACGGACCTCCCCGAGTAGC  
CCCTCCCTTTTTTGGCCCCCTATCGGGGCTTTATTTGGCCGAGATATAGCCATTTAAAGTTTTTCGGGGGGGTAGT  
TATGTCTGTTTTGAAGCGACATAGCTCCGCCGATCTAAAAAAATCATGGAGATATGACGTTTCAAAGCGAC  
ATAACTTCGCCGTCGATCTTGGCGGATTCTACGGACCTCCCCGAGTAGCCCCCTCCCTTTTTTGGCCCCCTATCG  
GGCTTTATTTGGCCGAGATATAGCCATTTAAAGTTTTCCGAAAAAAATCGTGTGGGTGGGGTAGTTATGTC  
GTTTTGAAGCGACATAGCTCCGCCGATCTAAAAAAATCATGGAGATATGACGTTTCAAAGCGACATAACT  
TCGCCGTCGATCTTGGCGGATTCTACGGACCTCCCCGAGTAGCCCCCTCCCTTTTTTGGCCCCCTATCGGGGCTTT  
ATTTGGCCGAGATATAGCCATTTAAAGTTTTTCGGGGGTAGTTATGTCTGTTTTGAAGCGACATAGCTCCGCC  
GATCTAAAAAAATCATGGAGATATGACGTTTCAAAGCGACATAACTTCGCCGTCGATCTTGGCGGATTCT  
ACGGACCTCCCCGAGTAGCCCCCTCCCTTTTTTGGCCCCCTATCGGGGCTTTATTTGGCCGAGATATAACCATTT  
AAAGTTTTTCCAAAAAAATTCGTGTGGTTGTGTGACATAGAAGTAACGCAAAGCATTGCATACTTTTCGAGCT  
GTTACATAAAAAAAATGCAGAACGACATAATCTCGCCATGATCAACGGCGGAGTTATGTCTGTTTTG  
AAGCGACATAGCTCCGCCGTCATAAAAAATCATGGAGATATGACGTTTCAAAGCGACATAACTTCGCCGTC  
CGATCTTGGCGGATTCTACGGACCTCCCCGAGTTTTTGGCCCCCTATCGGGGCTTTATTTGGCCGAGATATAG  
CCATTTGTTTTCGGAGTTATGTCTGTTTTGAAGCGACATAACTCCGCCGATC

>Ref\_dvir\_904

AAGCTGGTTTTGTGACATACGTAACCTGTGTCCAACCTTGAAGACACTTAATTCAAATCAGTAGAACTTCGC  
CACACGATGCATTGTAGGTTGTTATCTGGGGCCGTAACCTCTGACACAGCGATACATCTTGCTAATGTCTCC  
AGTCAGGGCAACATGGATCGTGCGAAATCGCATTAAATGTTTAACGGTTTTTGACTGCCCAACCATCAA  
TACTTCATTACGCGAACGCTGGTGATAGCTGAACCATCAAACAAGACACAAAGTTTTGGTGCTTTTGTTCT  
TCAGCACGCAATGATGAGGGAGAAAATATTTGCATAAACGTAACGACTTTGGAGGGACAAGAGTCATAT  
GTCCGAGCTCCATATACTCTTGAACGCGCAATACTGGGATTTAAGGTTGGGATGACGATGCAACTTTCTCT  
CAAGCGATATAAATCTGCGAAATGCCTGTTGGTAAGATTCACCTAATTGATCCAGAGTGAGTTTGAGAGG  
GAGTCGCACGGAATATGCTCCTGTTGGCAACCTTTGGAAATCTTAACAAAATGCTCCTCGCAGTCAAGCT  
CTTCCTTTGTTGCTTTAGCAACAGGGTCTGGAAAACCTTTCTACTTCCCAAAATCGTTGAATTAACATCATCGG  
TTCGGCATCAGAATCAGTGCGGGCATCAGACGATACACGATTGGCCAAAGGAGAGGTACCGCCTTGCTGG  
GAACCGCCACCTGCAACTATCCATCCAAGCAAGTCTTCTGCAGAAGAGATAAGTCAACTCGCTGCGGGCTT  
GTAAAAGCAAGGATCACGAGGCGAATATTTACATTCCAATTAAGGGCGATGCTTGGCTGGCGATCTGCT  
ATAGTGGAAGCTACGATGGCTGTGATGATTGCAGAGTACTCTGACGTTTGAGATTGTAGATTGACGGTCA  
CAGTGCATCCATCAGTAGCGAAAGGGGCGTTTTCCAGGCCAGCAACTAAGGATGAAGATGGACTTTTCT  
TTAACTGAAGCTGCAGAGCGAATCGGGATGTAATTTAATGTAGCCGTGACCCACTATCCAATACAGCACG  
ACACGGAAGTAGAGTTCCAGACCGATTTTTAACTAGTACAATAGCAGTGGCCAGGAACACAACATCGCTG  
CTGAGGTTGTGGGCAACAAGAGAGGTAAAGACGGGGGCTGAACAAGCTGTAGTAGGAGTGACAGAATGA  
TGAACCGAATGCAAAACGTCGAAGTGCAGAAGTGTGTGGTGTGGAGC

>Ref\_dvir\_689

GTTCTCGTCCGATCACCGAAATTAAGCAGCGTCGGGCGCGGTTAGTACTTAGATGGGGGACCGCTTGGGA  
ACACCGCGTGTTGTTGGCATCGTCCACAACCTTTTTTTATAGCTCGAACAAATTGTATATTACTTCAGAATC  
AGTATCTCATTTTTCTCTATCTAACATTATTTATCTGGTTATATATGGATTAAAGATTTTTTAAAATATAGT  
TCAGGTAAATTCGATATTAGTTAATATTTTAATTTTCCCTTTCCCGACTTCTTGCCGCTTGTGCTTCTGAC  
TTATATATAAAATAGAACTTTTCTTGCGTTCGTTTGCCGACTCTTGCAAATGCTGAGCCCCAAACGTCAC



ACTTGTAGCATAACAACAATTTTTAAATCCAGCAAAAATGCACTCCTCATGATTTTGAAATTCCAGCTACA  
AGTTTGTGCTCTAAGCACTCGACATTCGCCAACGACCATAACCACGCTGAATACATCGGTTCTCGTCCGATC  
ACCGAAATTAAGCAGCGTCGGGCGCGGTTAGTACTTAGATGGGGGACCGCTTGGAACACCGCGTGTGT  
TGGCATCGTCCACAACCTTTTTTATAGCTCGAACAAATTGTATATTACTTCAGGTTATCTATCGTTTAAATT  
GCTCAAAAAGTACCTCATTTTTCTCTATCTAACATTATTTCTCTGGTTATATATGGATTAAAGATTTTTAAA  
ATATAGTTCAGGTAAATTCCGTATTAGTTAATATTTTAAATTTTCCCCTTTCCCGACTTCTTGCCGTCTTGTCG  
TTCTGACTTATATATTTAAATAGAACTTTTCTTGCGTTTCGTTTGCCGACTCTTGCAAATGCTTAGCCCCAA  
ACGTCACACTTGTAGCATAACAACAATTTTTAAATCCAGCAAAAATGCACTCCTCATGATTTTGAAATTCC  
AGCTACAAGTTTGTGCTCTAAGCACTCGACATTCGCCAACGACCATAACCACGCTGAATACATCGGTTCTCG  
TCCGATCACCGAAATTAAGCAGCGTCGGGCGCGGTTAGTACTTAGATGGGGGACCGCTTGGAACACCGC  
GTGTTGTTGGCATCGTCCACAACCTTTTTTATATTACTTCAGGTTATCTATCGTTTAAATTGCTCAATCAGTA  
TCTCATTTTTCTCTATCTAACATTATTTCTCTGTTATATATGGATTAAAGATTTTAAAATATAGTCAGGTAA  
ATTCCGGTTAATATATAAAAAAAA

>Ref\_dvir\_610

TGCAATTATTGTTATAATTGTTATTATAACCACGAGAGTTTTCTCTGCCTCGGTAATTACCACGATAGTTAA  
CAATACAAAAGTTTTTAGCTTCAGCAAGTCCAAAACACGTCTACTTTACTCGCTTCTCTGCTAAGGTCTGA  
CTCCAAGATCTTTTACAATTGTCTAACACTCTTTTCTTATTCTTAGTTATCGAACAACTTAACAGCTACC  
TATGGATAGGACGTGCAGCTTCACTGTTGTGTTGCTAGCAGCCTGCTACAGTTATTACAATACAAGAATAC  
AATACCGAGCATGCATTGCCTGTCATAACTATACTGTATTGGATATATTTTGGCATCGTTTTGAAAGTGCC  
TGCGTAAAGTATTGCTTTTAGTTTGTTCATGCTCACAATTTGATCATGACTGAAATGGCTTCTTTGGTACAGA  
ACGTATCAGCATGTTCTGCCTTTTCGTCCTTCATCGATATAAGAAGATTCAAATTATCGATTTAGTTTGCGA  
GTTGTGTGGCTAATTTACATTTTGGTAGAAATAAGCCGTTTTTGCTCTACTACATCGGAAAATCGCCGAA  
AAATCATAGTCTGCAATTTAGATAGCATCGCGTTTATTGTGATTTTATCTTGTATTTTATAAAGAGTTGAAC  
CAACTATTTTGGATTTTATTACTTCAATTACAATTTCTTCGTATGGACCTTTTGTAGGTTTATTAATTATAT  
TGCAGTAATAAATTTGTAGATGGATTTTATTCCATCGATTTCTGGTGTGGCCTGTACAATTTCTTTTATGTA  
AGCCCTTGAGGCTGCAGAAATGTCTTCCATCGTAATAGGTTTTAATTCTATGTTTGCTTCAGAATCAGAAC  
ACTCTGACAATTCAGGTAATGCAATTATCGCTGAAGTTGTAAGATTATGTATGTCTTTAACTTCTAGTTCC  
ATGTCAGTGACTGTATCAGATTCACTTTCTTTCTTTTCTTTATCTTCAGGCTGTTTAGCTGTTTCGATTGTTA  
AAGCTGTGTTTCAGTATAGTTGGAATCGATTTATCCAAATTATTTCTTTACTCTTATCGCAACTTAATTTATTC  
GAAATTTGGTTAAGACCTTTGAGGCTTGTGACAAATGTTGATTGGTAATCTTTCTCTATGGTCGAATATAA  
TGTTTCATGCTTCATTTAAAAACCTTACTAATATATTGCGTGGTAGTTATTGTACTTGCTGTGTTCTTTGATT  
GCGT

>160\_rnd-6\_family-1820\_\_RC\_\_Helitron

GCTCTTAAAAACTGGTTTTAAATATGACCAAAAATATATTTTCCTTATAATATTTAATAATCAAGATATTGTA  
TTCGTAGATTCGTACAGTGGCAACACAATTTGTTTCTTAAAGTACAACAAGAAGTCGTGCACTTTNATAGN  
GCATTTAATNTTCGGCNTCGCCGAGAACATGCTTTTTTATACCCTTNCAGCGNGTANTTTANTTTTGTGCG  
AAATGTGTAACGCATAGAAGGAGACATCCCGTATCATGAAGCATATATATTCNTGATCGGCATCAACAGN  
CAGAGTCGATATAGCCATGTCCGTCTGTCTTTCTAGCAACTANTCCCTCAGTTTAAAGCTATCCTAATGAA  
ACTTTGCANANATCCTTTCTGTTGCGTGNAGNANATATGTGAAAACCGGCTGGATCGGANCACTATATCG  
TATAGCTGTGCGGGAACNATCGTTTCGGAGAATTGAGTTTTTGTATGNNAAACGTNATGTTTATCAAGAT  
ATNTTGAGCAAACCTCGGNATTTACGAGCTTTNCCGNGCTCCTCATATATATGCAGGNTCCAATATTAACGA  
TCGGACCACTATATCATATAGCTGCCATAGGAACGATCGGTCGAAAATTAAGTTNTTGTCTGAAAAACAT  
TTCGTTTTTCAAGATATCTTGAGCAAACCTCGGCATTTGCGAGTTTTAATATANTCCTTATATATAAGCNAA  
ATCCTATTAAGATCGGACCACTATATCGTATAGCTGCTATAGGAAGAATCGGTCGAAAATTAAGTTTTGT  
ATGAGATTTGTTTATCAAGNTATCTTGANCAAACCTCGGNANTTACNAGCTTCACTGCGCTCCTCGCGTATC  
TGCAAAGTCGTANTAAGATCGGACCACCATATCATGTGGCTGNCATAGGAACGATCNNTCGNAAATNAAG  
CTAGTGTNTAAAAACACTTTGTTTATCAAGATATCTTGACCAAACTCGGCATTTACTGTTTTCCCGGTACTT  
CTTAGATAGGGGCAAAGCACTATGAGCATTATGAAAACCGTTTAGCAAATGTCTGCAAGGGTATTAATC  
TTCGGCGTGCCGAANATGCCCTTCGTTCTCGTTTTGTTAANTTTGNCTTCAAACGCTTTGACTCCATGCCA  
CTTATCCATTGNATATNTANGAAACNCCAGAGTNNTGCANTAATTAAANCTTTGCGCCTACTCCATAATGG  
GTAATTATTTTGTAT

>9\_rnd-1\_family-266\_\_LTR\_\_Pao

AAAAGTTAACACATAAGAATTTCACTTCATATTTATGTCATAAGAACACACTTTTGTTTATAAGAACGCAA  
GAATGTTGCAGTGCACCTTTGCTTACACTGCGACATTCTGCTGACGCACGAGTTCAGTGCCCCGGCCACTGCG

GCCAGCAGCGGTAACCTGACACTTGCCTATGTGCGAAAGCGACAGTGTGGCGTATGCCGATTTCGGCTTGC  
CGGATATAGCAGCTGAGACTTATGCGCCTAGCCTTTGGGTTTCAGATCCAATTCAATGTTTCAATTCTAGTT  
TAGTTTTGTATCCAACCTTTGTAAGAACAACCTTCTTCAAATATACTGCTCCGGCACTTGCCGTCATCAATCCG  
TTATACTAATTGTTTCATTGCTGAGCCACAAGGCCAGTGATTTGGAAAGCTAGTTGCTTTCCGAACATAAT  
CTACAAGGAATATAACCTTACCAATCTCAGCACCTGTGACGAGGATCTGAATATACAACATCAACATCTA  
CAATTGAGAAATCAAATAACTTACANGTGCGAGCTATATTATTCAGGTAAAAAGCTTATATGCTACTGGA  
TGCTAATTTATAAAAGTTGCTGCGCACGCACCACCGAATTTTCGCAGCTGCTATTAGGTACCAACGACGGA  
AGACAGACAACTGTTTCGTCAGTCAATTCTGGCCATATTGGGTGTATGAATACGTGCGTGATCTTGCGCGGT  
ACATGAAGTGATTTGCCAAACGANACCTTCATCGTCCTGTAAGCAAACGTGATCATTATCAAGCAAACC  
ATCCTGGAAAAAGACAAGGAGACAATACGAACAGTCGTCGGGATAGCTATCGAGATCCTTCAATGACCTG  
TGACCAAAGTCGGTGTGCTAGGCGCTGAACATATTAGAGGTAAACAAGCTCCAGAAGAGAATGCGGAAA  
CTGCAGGTGCTTGTTACCAAGGCCTCAACATTAAATGAAAAATATTGTGCTCTTTTCTAAATAGTACCTAG  
ATGATATTGGTCAAATCTTTATAGTAGTTCTGGATAACAGACCCACTATCGAGACAATACGTTAACTAAAT  
CTACACATGTTGTCTGGACTTGCCTAACCAGGGGCAACTCAGGCCGCTCCTGGTTGGTTACGAGCCACTGC  
CATAAAATCGGGCTCACTCTATTGTGTTTACACGCGAGAAAGATTGCCACATTAAGCCTGTTCTGCATCCA  
TATTTGCTAATATATAAA

>Ref\_dvir\_846

AAAAATTAGATTAATATTATGCGAAAGCAGCAAATGCCAATATTTTGTTTGTTGCCCGCTCCTCGCATATC  
ATAAAATCGCTCAAATATTATTACCTATTAACCTATCTAGCGCTCTTTTACCTTTTATACTTTTGTCTTAAGC  
GGCTAGCGCATCAATGCTAGCGACGCAGCAATTTATTCTTGTCTCGTATTTCTTATCGATCGTTTCGTTGAA  
CATCGTGCAATTCGCATAATTTCAATGCGCTCGCTATAAGCAAATAAATAAATCAAACCTATTGCATGATTT  
TATAAGAAAAAGACGTATATTTGTTAGCCCAACAGTTATAATCGCGTATGCATCAGCAATACTTTGTCCGC  
ACCTTATGGGAGTTGTCTGTTGCTACTTCTACTTCTATATAACATGTTTATTATCATCGCTGGAAGATAGA  
AGAGTTATAACAGTGCTGCATTTTTTAAACACCTGTAAGAATTATTGACTGCTCGTCTCTCAAGCATGTTCT  
AACTTTAATGTGCCGAGCAGGGACTCATAGAGTTGCTTGTGCCAGCAACGATCATTAAAGCTTTAAAGA  
ATCTCCCAACTAAAATGCTCTTTGATTCTTCTGCCAATAGCGCTCTGGTCAACATGAGCTTCAAGAATTCTT  
TCTTCAAACTAATAAATTTATATATTCTTTATGTTTCATGGTTTCTTTTTACCTATATTAATTATAATGTAA  
TATTAGAGATAGCCTGAAAGCTACCAGAATTGGTTGATAAATAAATTAATATTTGTGTATTAATACAAAG  
GAGTTCTTAACACTGAACCCTAGCTGTAAGTTGCGGTAGCGTGATTGTGCCTCGTCCAAGTCGTAAAGTAT  
CATAAACTGTCGCTAACTACTGCAATATTGACTGTTGCTTATGTTTTGTGAGCTAATATACAACAAGTTCTT  
GAAGGCTGCCGTTGTGATGCTGGTGAAACCGCCATAGCATCAGCAGTTAACTGCTTTCCCGTTGGAGGCA  
TGTTGAGACAAATACATGCAAATTTTATGCTACCAATTTGCTGATTTTACGCTTCTCTTGCCCTCCTTCTCAA  
ATACCGTTTGAGGAGGGCAAGACCGCTGACGGTATCACCGCTTATTAGCGCTTGGAATAATACCCCTTAG  
GTACGGAGTTCGTTAACGCGTCGGCCTTAACCTCCTGTGTAAACTCAAATTATTGCAGGAATGGTATAGTC  
AGATA

>9\_rnd-1\_family-398\_\_LINE\_\_I-Jockey

GGTTCCGAAAANCTCACGGCACACCGGAACAGCTAAATAGGGTGGTGAATTTTATCCTCGAGGGTTTCGA  
AGCCAAAGAGTACGNAGTGGCAGCGTACTTAGATATAAAACAAGCCTTCGACAGAGTCTGGCATGATGG  
ACTACTCTGCAAAATCAAGCCCTTGTTGCCACCTCAACTATATTTGATTGTGCAAAGTTATTTGACAAACC  
GGTCATTTTCGGTAGTACTCGATGGAGTTGAGTCCAACATGAAGGCCATCGGGGCTGGCGTTTCTAAGGG  
AGTGTGCTAGGGCCCCACGCTCTACACCCTCTTTACCTACGACATGCCCCTGGCTCTACAATTGAAGTCGC  
GGATCCACANGACCTTACCATCGCCACTTTTGCAGATGACGCAGCCATCTTATCAAGAAATGAATGTGTCT  
ACGAAGCTACCGACGTCCTGCAGCAATATCTTCACAAATTTGAAATGTGGGCCAAGCGTTGGAATATTGG  
CATTAAATTTAAATAAATGCGCCAATGTGACCTATGCGCTACGGAGGGACATGTGTCCGGGAGTTTCTTGC  
GCGGTCAATTGGTGACGCACTACAACAGCCACAAATACTTAGGTGCACTTAGACAGGGCGTTGAACCTTA  
ACAAACACATCACAAGTGTCTCTGTAACCCTGAAGAACAGAATAGGAAAACCTAAGATGGCTTCTGAGCAG  
TAGAAATGCGTTGTCTTTGAAAAATAAAGTAACCATTTATAAATCCTGCATAGCTCCCGCCTGGCGTTATG  
GTATTAGGTATATGGCATTGCTGCAAAGTCCCGTCTTACAAAAATCAGGGTGTTCGAAGCAAAAACGCT  
CCGATATCTGTCTGGTGCCCCCTGGTATATGAGAACTTCCGACTTGGAATAAGACCTAGGAGTGCCCAA  
GTCGGGGACGTNATAAATATACAGGCCGCAAATTATATAGCGCGACTGAGAAACCATCCTAATCGTCTGG  
CTAGGCGTCTTCTGAATAGGCGTAGAATTGGAGGACTCCGAACGCGGAGGAGACTGCGAAGGTCTCACCC  
AATCGATCTCCAGATCGATTTATATAGTCGCCACTGTAAATTTGTATATTAGACTTACCAGTAGAATAAG  
TAGTTTGTAAATATTCATATAAATTTAATTTAAGTTGTTCTGATAATAACAGAAAATTAATAAAAAAGC  
AAATTTAAATAAAAAAA

>Ref\_dvir\_807

CTTAATAGCTTTTCACTTTTATCGGGTGGGGACTGAATCCCGCCTCTGCACACCGTAAATACCAAATATTTCA  
CGCTTTTTTGGAAAACTTGGATTTTTCTTGAGACACTCGTATGCCAGCACCCCTAAGGTTTCTCAAGACC  
CACTCAATGTCCCTGATATGGTCTTCTTTGGACTTGGAGAAGATTATTACGTCATCAACGTAAACATAACA  
TATCTTACCAATTTGTTTCGCGGAGGACATCATCAATGGCTCGTTGATAAAATACTTGGGGGCATTTTTTCAGCT  
CGAAAGGGAGTCTACAAAGCTCATACTTCCCGTTGTTAATAGAGAAAGCTGTCTTTTTTCTGTCTCTTTCA  
GCCAATTTAATTTGGAGAAACCCTGACTTGAGGTGTACCGTAGTGAAATAATGAGCCTCGCCCAAGTTTG  
ACAATATAGTCGAAATGGATGGGATAGGGTATTTGTTCATCGGTTGTCTTCTGATTTAGTTTCCTAAAATCA  
ATAACCAGACTTCTGTTTGTGCCCCGCTTCGTCGATCCTTTTTTTGTGCGACAACCTATAACGGGTAAATTTA  
AGGGGACTTTGACGGTTCGTATTATGCCATTTCGCTAGAAATTGTGTAACCTCTGCATTGACAAAGTCGGACA  
CGCCCTTTGGATACGGATAAAGTTTTGAGTAAACCGGTTTCGTCATCCGTTGGTATAGTGGCAACCGTATTT  
ATGTTGTACGGCAGGGATTCGTTAACGTCCGCAAATGCTTTTACCATTTTGTGATCATACTATCAAAGGT  
GGATCTGACAGCAGGAGGGACCTCCGTGTCATTAATCCGAATGTGGTTCACCTGTTGACATTTAGTGA  
CAATTTTTTTAATCCCATGGTCATGTTTAAATGACGTTGTTTGTCAAATCTATTAAGGCATTAATCTGTTT  
ACAGATCAAGGCCAATTATGCCGTCAAAGTCATTAAGTGACTCCAACATGAACAAGTGGGACTTTACGCT  
GAAAAGGTAGATGAGGCATTTCTGCTCAAACCTTAGTGTGGCCGTGAATTGATTTGACTTGAAAAGGGCTG  
TCAACTGGCACCCCAATGTGTGAGTTCGGGAAGGGGTTTTCTATAATTTTTCGAGGGCCCTGTGTCTATCAA  
AAGTCTGATAACTCAACCTGCAACCATTGTCTTATAAACGGAAGCAGGGAGCTTCCGCTAAAAAATTAC  
AACTTTC

>Ref\_dvir\_702

AATTATTCGTCCTGAAAAGGAGTGCTAAGCGTCGATACTGGCCATAAAAAATTTTCAGACGCTTTATAA  
GTAGAAGGGATGCCGTTCACTTGCATCACAGACCACACCAGCCTAAAATGGCTGATGTCTATGAAGGACC  
TAGCACGTTGGACATTGCAGCTGCAAGGCTACAACCTTACCATCGAGCACCGTAAAGGCAGTGAGAACGT  
AGTAGCCGACACCTTATCTCGCTGTATTGAAGCCGTAGGAAAGGTTACGGAAAACCTTCTCGAATTTGAG  
ACCACCGAGCTTGACTCCGCGAAACGCTCGAGACCTTACGTAGGCGGTTTTACTGGCCCGGCATGGTTAG  
TCAGGTAAGGGATTGGGTGAGACAATGTGTGACATGCAAGGAAGTCAAGGCACCAAACCTTTCGCATGCA  
AGTGGGTCTAGGAGAAGAGGTAGTGACCGAGCGACCATTCCAAAACTATATATTGACTTTCTGGGAAAG  
TACCCACGTTCTGAAGCAAGGGCACGCGTGGATCTTCGTGGTAGTCGACCATTTTTTCAAATTTACTTTCTT  
AAAAGCGATGCGGGAGGCTACGGCTCTTAACGTGGTGGAGTTTTTGGTCAGCGAGGTTTTTTATAAGTTG  
ACATGATCTTAGCTTTCAACATCTCGCACATGCGCACCGCAGTCTACCACAGAACAAGGCGAGCGAGCGA  
GTTAATCGTACCGCGTTGTGCGCCATCCGGGCGTATCTAGAGCAAGATCACCGCGAGTGGGACCTCTACC  
TTCCGGAAATAGAGGTGTCCATACGAAATGCCATACACACCGCGACCGGGGTGACCCCTTTCTTTGCCGTT  
TTCGGACATCATATGTTTCTTAACGGGGCATGCTACAGATTGGCTCGTAGGTTGGCGTCTCTGAGTGATCA  
TGAGATCTCCCATTTGCACCCAGCAGACAAAATACACCTGATTAGACAGCGAGTCCAAGGCCAACTACAT  
CAGGCTTACGAAAGAAGTCAGCGGCAGTACAATGCTCGAGCCCGGGTGTTCCAGGCGGAAACCCGGACA  
AGAAGTTTACCGACGCAATTTTGTGCTGAGCGATTTTGGGAAAGCTTTCAACGCCAAGTTTGCAAGAAAA  
GTTTCTTAAGGCCAGAGTAGTGCGTCGAGTAGGGCAACAACCTCGTACCTGCTGGAAAAATTGAAAAGCAA  
AA

>Ref\_dvir\_979

TTTTGGTAGCAAACCGGTGCTGTATCATTTGTATCACTTGGGCTTAGCCGTTTCTCAGGCTCTAAAATAGA  
TGTACTTGTGGGCTGAGTGGCTTCATATTTGCTTCCTCAAGCAAAATTTTCATTGGGCTTATAATAGATT  
TGAAACTAATTCATTATTTTACCAATTGGGCTTTTTAGTGATGGTATGATGACTCCCGCTTGCGACTCTTC  
TATAGATTCCAAGCTATCTATTTGAGGGCTAAGTTTTGTAATGGATTCTTTTATATTAATGTCGTCTTGA  
TGTTTTAATATTGTCTCGGCTCGCTCATTTACATTAAACATTATTCGGTAATATTATTGTTATCTATTTGA  
GTTTGAAGCTCTGAAGTTTTGTACCCCGCATCTGTTTTTGTATCATTTCTGCCGATTCTTTTGTCCATTTGTAT  
TTTCATCTCCATGGTCTTCTAATAGTGGTTATTTAAGGTATCATGAACATTTAAGACTGAAAAAAAAAAAA  
CCAAAAAATTTTAATAATCACCTGCCAGTCATGATTGCGGTTTAGGAAGGGGATTCTATGCAATATCTA  
AGCACAGGCTCGCTTACCTAAGTTATTAGCATTGACAATATTCTCATTGTTACATTTAGCTGAAGTGGTCG  
CGGTCAGAATTGATGGATTCTTAAAAAGAGAAGTTTTAGATTACATTACGTTGTAGTCAATACTACAAAA  
AAATTGAAAGTGGTTTACCTGATCGACTTTATCATAATCACCCTTCCATAGAAGAATTGGTTACTTCTA  
AAGGTGCATTTTGGTAGCAAACCGGTGCTGTATCATTTGTATCACTTGGGCTTAGCCGTTTCTCAGGCTCT  
AAAATAGATGTACTTGTTGGGCTGAGTGGCTTCATATTTGCTTCCTCAAGCAAAATTTTCATTGGGCTTAT  
AATAGATTCTGAAACTAATTCATTATTTTACCAATTGGGCTTTTTAGTGATGGTATGATGACTCCCGCTTG  
CGACTCTTTCATAGATTCCAAGCTATCTATTTGAAGGGGCAAGTTTTGTAATGGGATTCTTTTATATTAATG

TCGTCCTGAACTGTTTTAATATTGTCCTCGGCTTGCTCATTTACCTTAAAATTAATTCCGGAAAATTATTTT  
ATCTTTTTTTAGTTTTTAAATTCTAAGTTTTTTTCCCCC

>160\_rnd-4\_family-17\_\_RC\_\_Helitron

TATAAACCTTTTTGTCCGTATGTATGAACGCGTGGATCTCATAACCTATAAGAGCTAGAGACTGAAATTTT  
AGATGTAGGTGCTCCTAGTGCCGGCGCAGATCGAGTTTGTTCGGATAATCGATCACTTACTCCGTTTCCA  
AGAAATCGATAAGAATCGATATCGATATCCTGTTTTGTTCGGAAAGGGTATTAGATCTTCGGCGTGCCGA  
AGATAGCCTTTCTTTCCCGTTTTTATACCCTTGCAGAGGGTATTATAATTTTGTCTGTGAAATGTGTAACGCA  
TAGAAGGAGACATCTCCGACCCCATAAAGTATATATATTCTTAATCAGCATCAACAGCCGAGTCGATATA  
GCCATGTCCGTCTGTCCGTCTGTCTGTTTCTATGCGAACTAGTCCCTCAGTTTTTAAAGCTATCTTAATGAAA  
CTTTGCAGAACTCCCTCTTTCTGTTGCACGCAGCACATATGTGAAAACCAGCTGGATCGGACCACTATATC  
ATATAGCTGCCATAGGAACGATCGGTGCAAAAATTAAGTTTTTGTATGAAAAAACATTTTGTNTCAAGAT  
ATCTTGACCAAACCTCGGCATTTATTAGTTTTACTTTACTCCTCATATATATGCAAAATCCTATTAAGATCGG  
ACCACTATATCATATAGCTGCCATAGGAACGATCGGTGCAAAAATTAAGTTTTTGTATGAAAAAACATTTTG  
TTTTTCAAGATATCTTGACCAAACCTCGGCATTTATTAGTTTTACTTTACTCCTCATATATATGCAAAATCCT  
ATTAAGATCGGACCACTATATCATATAGCTGCCATAGGAACGATCGGTGCAAAAATTAAGTTTTTGTATGA  
AAAAACATTTTGTNTTCAAGATATCTTGACCAAACCTCGGCATTTATTAGTTTTACTNTGCTCCTCATATAT  
ATGCAAAATCCTATTAAGATCGGACCACTATATCATATAGCTGCCATAGGAACGATCGGTGCAAAAATTA  
GTTTTTGTATGAAAAAACATTTTGTATCAAGATATCTTGACCAAACCTCGGCATTTACTAGTTTTCCCGTA  
CTTCTTAGATANGGGCAAAGCACTATGAGCATTATGAAAAGGTTGGGTCTGCAAGGGTATTAGATCTTTG  
GCGTGCCGAAGATAGCCCTTCTTTCTCGTTTTAATTTTTT

>9\_rnd-4\_family-368\_\_RC\_\_Helitron

TTAAGTGAAAATAATAAATTGAAATATAATTTTTTTTATAGTAACCTAACGTGTAAAACCTTAATTATATAT  
ATATATTTTCCTTTGCTTACATATTAATAATTCTGGTNTATTAAAGCCGATGCTATTTTTTTTGTNTTATAC  
CCTTTGCGGAGGGTATTATAATTTTGTTCATGAAATGTGTAACGCATAGAAGGAGACATCTCCGANCCCAT  
AAAGTATATATATTCTTAATCAGCATCAACAGCCGAGTCGATGTAGCCATGTCCGTCTGTCCGTCTGTCTG  
TTTCTATGCGAACTAGTCCCTCAGTTTTTAAAGCTATCTTAACGAAACTTTGCAGAACTGCCTCTCTTTCTGT  
TGCAACGCAGCACATATGTGAAAACCAGCTGGATCGGACCACTATATCATACAGCTGCCATTAAGTTTTT  
GTATGAAAAAACATTTTGTNTTATCAAGATATCTTGACCAAACCTCGGCATTTATTAATTTTACTTTTACTCC  
TCATATATATGCAAAATCCTATTAAGATCGGACCACTATATNATATGCATAGCTGCCATAGGANCGATCG  
GTCGAAAATTAAGNTTTTTTGTATGAAAAAACATTTTGTNTTCAAGATATCTTGACCAAACCTCGGCAT  
TTATTAGTTTTACTTTACTCCTCATATATATACGAAAATNCTATTAATATCGGACCGCTATANNATATACAT  
AGCTGCCATAGGAACGATCNGTCGANAATTAAGTTTTTTTGNATGAAAAAACATTTTGTNTTCAAGAT  
ATCTTGACCAAACCTCGGCATTTANNAGTTTTNTNTGCTCCTTATATATATGCAAAATCCTATTAAGATCG  
GACCACTATATCATATAGCTCCATNGGAATAATGAGGTGCAAAANTTAAGTCTTTTAATAANAATATATTTG  
NTNNCGAGATAATATCTTGACCAAACCTCGGCATTTACTTTTTCCCGGTACTTCTTAGATAGGGGGCAAAGN  
ACTATGAGCATTATGAAAAGGTTTCGGGTCTGCAAAGGGTATTAGATCTTTGGCGTGCCGAAGATAGCCC  
TTCTTTCTCGTTTTTCAATTCAATTCAGTGCATATGGCTAGTCTTAAACAATTATCAGCTTAATTTTTATTTT  
TAATTGTCTTTTCAATATTTT

>Ref\_dvir\_868

TGAAAATTGAAATGTTTTATACAATTATAATCATAAGCTAGAAAAGAAGTCCACTGGTAAAGAGACAAAA  
ATAAACAATCTTAATAAAAAACCGAAATGATTTGCAAAATAAATACTAATTTGGAAAGCACCCATAATGCAC  
GGTAAATTACAAAACCACTGGGAAAATAGAAAAAGTTGACGAAGATCATTTTAAAGAGACTAACAGAGG  
TCGAAAATTAACATTATAAAACAAATTATCAAAAACAAAAGAAATTAATAAGAGCAAATATTTACA  
GGAGGACGCAATTCCAAAACAGGACCTATAACTTTTCATTTTTCTGGCATTAAATGATGTCAACTATATTACC  
AGGAAGTAATAACCAGTTTATAGATATCAACCCTATTAAATCAAATAATGGATACTTACTCTTTAAATAG  
GCATGATAGACAACCTACGAGCACCCTGCCTCACAATAAATTTACAAAGACAGAAGACACATATGACAA  
ATTAATGTTACAAACAAACAAATATAAAGACAGAATACAAATTCAATATTTAACAGAAAAGTTGCAAAG  
AGAAATAAACGGTATCCGAATAGTAAAAAGAAGAAGAGAGGATTACTTAATTTCTGATAGGAACAACATAC  
AAATACTTGTTTGGAACTTTAGATAACAACGATAAGGAGGAACTTGAAGAAAAAATGAATTCAATAGCTC  
AAAATAGTATTCAAATAAACGAACTCAACCATGTTATTGAAGCAGTCAACCAAGGAATAGAAATAGTAA  
ACAAAGGAGAAGAATTTAAATACTGGAACCTACATTCAACTTACAACAATTCACAGAATATATTGAAGATT  
TAGAAATGGGAATGCAACTAACTAGATTGGGAATTTTAAATCCAAAATTATTAACACGACTATCTCAC  
AAACGTTAATTCGAAAAGCTACTTAACATAAAAAACATCTACTTGGCTTAGATCAGATACGAATGAAATT  
TTGATTATTTACACATTCCTAGAGAAAATAAATAAAACCCCATATACGAAATTCTACCCTACCCGGACG

AATGATAAAAAATATTTTACAAGACGAAACACAATACAAATACTACTCACATAATAAAAAATCAACACAAC  
AAGGACAAAAAAACACAATAATAAACCAAAGATTAGGA

>Ref\_dvir\_1037

TCGACGAATGTTGTCCGAGACGAAAAGTGGATGTTAAAGTCATTAAGCACATTCACTTCTTCTGACTTAGA  
ATTAAAAGATGTCGTTTGTGGCGCAGTGATTTGCAAAGGTTTAGTGGATACCGGAGCGGACCTGTGTCTTA  
TGCGTAGGCGTGCCTATCGGAAGTTAGGAATCACACAATTAGCCGGATGTTTTAAGACTCTGACGGGTAT  
AGCTGACAGCCAAATTCTGACGTTTGGGAAGCTTTATAATATCTGTCAAGATTGATTACATTCAAATGGAAA  
TCGAATTTTCATGTCGTACCAGATGAGGATATAAGTTTTCGAAGCAATTCTTGGCAGAACCATTTTGGATTAT  
GTTGACTTGCAAGTGACTAAAAAGGGGATTTTACTAAAACCGAAAGTTGATGTAGAAAATAAAAAAGATCA  
GCGCTAACAATAGTTCTTGTTTTGAAGTGTTCATGAGTTTGAAAGTATGTGCATGTTAGCTATGGACCAA  
GAGGCGGTTACGATCGAATTAGATCTTTCACATTTGAGAAAAGTTGCAACAAAAAGAGTTTAAGCAACTAC  
TACATTCGTATAAACCAATCAGAAATCCAAGCTTTCTAATTGAGATGAAGATTCTTTTAACAGACGAGCTG  
CCAGTATTTTCAGCATCCGAGACGTATAGCCGTGTGTGATCAGAAAATTATTAATGAGTAAGTGAAAGAAT  
GGCTAGCAGAGAAAATTATCAAGCCCAGTATGTGAGAGTATGCCTCACCAGTTGTTTTAGTGGTAAAAAA  
GAATGGCAAAAATCGTTTGTGATGCGACTACCGTAAGCCAAATGAAAAGGTTATTCATGATAATTTTCCT  
ATGCCTTAAATGGATACTGTAAATTGAGAAGCTGCAAGGTGGGTCAATTTTCACTACATTAGAATTTGACA  
AATGGATTTTTCATGTACCCAGTTGAAACAGGCTCGCAAAAATATACTTCATTTGTGAACCAAAAATGGGC  
AGTATGAATTTTATACGTGACTTTCGGCATTTCAAACTCTCCAGCAGTGTTCACTAGATTTATAATGGCA  
ATTATGCGAGAATTAATCCAAAATAATGATGGGTCTGTTGAAGCTGAAAAGAGTGTTGCAAGTTGCAAGA  
ATAAATTGGTCAAAATATCAC

>Ref\_dvir\_938

ACCAATTTGTCACGGGTTTCATAAACGCAATTATATTAACCATTTCGTAATTAAGCTTAAAAATTATACAAAA  
ATAAAATTTTTTTTTTGAAGTCTTCAAAGTACTTCATTAATATATCTGGGGCTTATGAGCCACTTTCCTGAG  
TAATGATAACACTGTTTCATAAATGTGCAACAAGTAAAGGCATTTATAATATACGATATCTACAAAATACG  
ATAGTTTCGTTGGGATATGTTTCATAAAGCAACGATCAGCCGCATAGCAAACGACAGTATGCCTGATCGCC  
AGAATTATCAAGTATCAGATAGGTATGCTTCCGTATTTTCAGTTAAAATCAGCGGTATACTGTAATAAAAG  
GGTAATCAATCCAATTGCCATCCTAGTAAAGAAAAGCATCAGTAACACTAAGAAGACCAGGATCACTAGC  
CACCAGTATATTATCCATAATGTATCGATGTACGATAGATGGAAATTGGGAGCAGCGTATGCCACCCTA  
CCATGATCGTCCAAGAGGCAAGCCATGTTTGAGACGATCCCTTGTACACCCTTGATCTTGTTTACATTGAC  
TCAAGTCCGCTTTTCATAAATCCCGGATTGGGAAAGGGTCTAGTTAGAATTAATGGTAACCTTCTTTATTT  
ATACCAATAAGATCTTTCATTTAAGTTGTTGTTATTCCGTAACATTTCAAAACTATTACATCTTATAGATGA  
GTTAGTTTTACTATAAGTAAGAAGCGATAGTCCTTTCTTAAATTAGAGTTCTTCCCTACCACTAACTGAAG  
TTTTATACCCTAGGCAAAAATTTTTTTTTTACC GTTGTACTCAGGGTTCTCATAAGCTCGGTTACGCT  
TGAAACAACAAGACGATAATAAAACAACAAGTGTAAAATTATCGTACGCATGCTAATTTGGCTGTAA  
AAGAAAAAAAACCTTATTTTGGCTCGTGAACTGCCAAGTAATACCAAAAGTAAACAGAACAAATTGTAAA  
TTATAATGGGGGCTCCAGCTTACCATTTAGCAGATCCAGCGACGAAAGTACTTTCGGCGGTGTCCATACG  
AGTGGTATTTATAAATATGCTTAAAGGCTTATTTTCTAACGCATTGTTTTAGATGAATTAAGTTGTAAAT  
ATCACTTGCCAACCAAAA

>Ref\_dvir\_808

CAACATTAATAATATTAAGAAAAAGAAAAACGAAGGACAATCTTCAAGTGACCTTTTTATTGATATTGAG  
GGTATAGATAGTGGACCATCTACATCAGCAGCTAATCTACTGATGATTTCTGCATCGCGAAAGATAGTCA  
ACACACCAGCTCCACCTGCTACAGCCGTTGCTCCCCCTTTTTTAACAACAGCAACGGCAACAACAAC  
AACAAACAGAACTCCATCGTTCCCATCATACGCAGCCGCACTGGCTCACAATAATGCTGCTCCCTTGGCAC  
AAATCACAATTATTCGCAGCGGAACCAGCAGCAGCCCCACCAGCAGCAACAACGATGATTGCAACAATA  
GCAATTTGCCCATATCTGGCGAAAAGCTGTTCCATAAGCAACAACCTCATATCAACTAAAGCTGTTAGTCA  
GACTCGGCGGAAGACTGCACGCATCCTAAACCGAAAAATCTCAGCCAAATCCCGTCTGACGCAACAATAT  
ACATCTAGCAATGCACGACTAGCATCAAATCGATTGAGTCTTCTATCCGAATCCGATCTAGATGCGTCCGA  
CCATCAGCTACAACCAAAATCGTAATCGCCGCCTAAACAGCGACAAGCGAACGCTATGATCAATAGCCTC  
GCTTCTGCTGTACAATCAGCTCTGACAGCATGTCCACCATCCTACCAATGTTAGCTCCCAACAACAAC  
CTCAACTCACAACGCACCGACGGCTCAAACAGCAGCAATAGCAGCTACCCCCAAAAACAGCTTCAATTCCG  
GCTGCTTCAACAACAATCCCCTTTTACAATGCTGTCACCAACGCTCCCCCAATATTGTGACTAACTTCCTT  
TCTGCCCCCATCCAACAACAACACGAGCAACATACAACTTTAATCCTGTTCCAAAACAGTTCAAGCCCC  
CACAAATATGCGTTCAACATAATGAATCCAATTGGAATGGCATTGATTCGTTAGTGGCCAAATTAACGG  
GCACAATCCACCCATAGTCGACTACGGCCTAAAATTGGGTGGCCCTGGCATCCTACGAATCATACCAAAA

ACGACACAAACCCAAGTCATCACTGCCCCGAACATATCCTTCTTTGAATTAGCTCATATTTAAATAAAGAAT  
CAAAACAACACTCTAAAAGCACAA

>9\_rnd-3\_family-201\_\_RC\_\_Helitron

ATCTCTATATATAAAACTGTTTGTCTGACTGACTGACTGATTGGTGATCAACGCACAGCCCAAACCGTAA  
GAGCTAGGAAGCTGAAATTTTCACTGTAGTTACCTTATGTGATGAAGGTGCACGTTAAGACGGGGTTTCG  
GGAAATTCCACCCGCAAGTATGGAAAAAAATCGCGAAAAACGTTTGTATGAACCTTTTNGCCATCCGATT  
GGCCTCAAACCTCAATTTCAAAGTTCTTTGTTCAAATTCATTTGAGGGGTGTTTCACACTTTTCCAAAAATGT  
ATTCCTCCTTGGTGGAATGGGGGTCAAAGATTTGGTGGGTGACGTTTCGCGCTCAAATTCATTAGATGAA  
AAATCATTTGAGACGTGTTTCACATTTTTCGCAAAATCTAAACTCCTTCGGTAGAAATGCGATTCAAAGAT  
TTTTTGGGCGAAGTTTTAAGTGGTGTCCGATTTGCTTCAAACCTTATTTTAAAGCTCTACATAAGAACTTAAT  
GAATACGTGTTTCAGCGATTTGGAAAATTCACCCGCAACAGTGTTAATTAGCGAAAAACGTTGGTATG  
AAANTTTTTGTAAACCATCGGATCGGCCTCAAACCTTATTTTCAAAGATCATTGCTAAAATTCATTAGAGGG  
GTGTTTCACACTTTTCGAAAAATCCATTCTCTCCTTGGTGGAAATGGGAGTCAATTTGGTGGGTGGCCTTTT  
GCCTTCAAATTCATTTGCATGGATCTACATAAAAAATCATTTGAGACGTGTTTCACATTTTTTGCAAAATCT  
AAGCTCCTTCGGTGGAAGTGCATTTTAAAGTAATTTTTTGAGNAAGTCCGATTTGCGTCAAACCTTATTTT  
CAAAGCTTCCCAACTCTTACGGTTTGAGGCTGTGCTTTCATCGCCAATCAGTCAGTCAACAGNACCAAACA  
GCTCTATATAAGAATATAATGAATACGTGTTTCAGCGATTTGGGAAATTCCACTCGAAACAGTGGTAAAA  
TGACGGAAAACGTTTGTATGAGAGTAGTTTGTTTTACCGTCCGCTCAGTTTCAAATCATTTTCAAAGCTA  
TTCGAGAACATTGATTTTATAACATAAGTGCCACGGGCAAGGCCGGGCTATACCCGCTAGTGTNTATATAT  
ATGTGTAGTTAC

>9\_rnd-4\_family-46\_\_RC\_\_Helitron

TTATATANTATAATTTTTGCATATATTTTCGGCAGAAGGACTTTNTATTTGTTTTACTAATATTTGCCTACTT  
CGATCAACGCAGTGATCTCCTCTCNATTACGTCTGACAATTTTTTATACCCTAAACCCATTGAAAATGGGTA  
AAAAGGGTATNATGCAAATGTATGTAACAGGCAGAAGGAGGCATCTCCGACCCCATAGTATATATATTC  
TTGATCAGCANCAANAGCCGAGTCGATCTAGCCATGTCCGTCTGTCCGTCTCCGCGCCCGACCGTATGTA  
TGAACGCGTCCATCTCAGAGACTATAAGAACTAGAGACTGAAGCTTAAATGTAGTTCCTGTTTGTTCGGA  
TANTCGATAACTTGNCCCGTTTCCACGNAATCGATAAGAATCGNTATCGAGATCCCGTTTTTTGAGCAAAT  
CTCGTAAATTATAAGAGCTAGAGTCGCCAAACTTTACATGTAGCTTCTNGAATAGTATATACATNTGTNAA  
AAGTATCTTTCACTTTACANCTATCGCCACCTCCCCGCTACCACCCAGAGCTATAAATCANGTTAATAGC  
CCAACCTTGATTGCCAACCAATTCAAGGCACAATTTNAATGCAATTGACATTTTTTGAGTACACGCGAATAT  
TGTATGGTACAATAATANNATATACTNTAGAAAATTTTATAAAGATCGGTTAAGAAACAACCAAAGTTAT  
ATGCAACTGCGCAAATTGACAGCTAGCGAATCGCTAATCAAGCAATNTNTGTATGCACGTACANACACAC  
ACGTTTCATGCGCTTCGCTTCGCATTCTATCGCATTCTAACAGCATGGCTGTTGCGATTTTTCTGTAATGGTG  
TGGCTGCTGAGTAGAGGCATAGCAAGTGGTGCGGTCTGTGCGAGTTCGAGCCCTACCGGGGAAACTATT  
TTATTTGCTGGTGTGGCTGTTGAGTGGAGTCGACAGCAAGTAATTCGGTTAGTTGCGAGCTCGAGCCCTGC  
CAAGGGAACTTTTTCTAATATTTTGGTTTTTGAATAAAAGGGTCAGGGTATTTCTGATGTCGGAGCTCCAG  
ACTAGGACCTTTTACTTGTTTCTTACTTATTTGGTTCCTCGTTGNTTGACACTTGTACAGGTCGCCATGTA  
A

>9\_rnd-1\_family-69\_\_DNA\_\_P

CTTTCATCTGGCCTTTGAGGCTTCGTACTGCATGCCTGCCGACAGGTTGTTTCGTTCTCCAAAGACCAGACG  
AACGAATGCCGAAGTCGCGGCTCGCTGATGCTGACACGAGCTACGAAGTTAGTCGCCAGCCTGCCTTCCG  
CAAAGCTTTGCGTCACTTCGTTTTCGAAGTACATTGAGCGAAAAAGTTTAGAACTTACGATCGACTGCTCT  
GGCTTTAGCTGGCAAGAAATTAATTTTGTAGTTTCTAGCGCAGATCATGACCTATCCCAAATTTGTGTT  
GATATATGAATGCATTTTGTGTACTGAGGTTGGCTCCGCAGAAAATATGTATTTCTAAGTCGATGCAAATA  
TTTACATAATTTCTTTAAATTAATTAATATTTATTTTATTCTCCAATTAAGAAATAAAAGAGTGCTAAAA  
ATACAATTACATTTCAAGTCGACTCGAAGGTCATATTTAGTTATGACCCATTATAATTATAATGGCCTCC  
TCGCGGTGTTCCCTGCGTACTTTGTTCTTTATAATTCGAACAAAAATAATAAAATAAAAAAAATTAATAATT  
AATTAGTGTATATTTGTCTTTGGTCAAGTCCATTTATCTGTTTGTCTAATCGATGAAAGTAGTAAATAGG  
GGGAATAGAATCTGAGTCAGTCAATGATGCATCAGTCCAATTATTCGAAAAGCCTGATTCACGGTCTTAG  
AAATTTACTCACATATTTTTCCCNTTGAACGCGTAATCTCCCTTCATAGATTAAAATACATCGCAGCCGAA  
GCAATAATAATGTGGACTGAACAAAGTGTGTTAAATTTGTTTTATTACGTTAGCGCCATGTATGCAATTT  
TTAATAGGAGTTCTTTTTCTTGATTTTTATTCTACTTTTTCAACTTCTTAAAATTGAAAAGCGTTTTGGAC  
TCGTTGGCTGTGACAGCTGGAAATCCTTGCGTGGCTGAGGTAGTTTTGCTAGGTTATTTGCTAGTGTGGCGG  
CTGTATAAAGAACGTATAAACTTGCCATTACTTTGGCGGCGTCGTCGACGCTGGGCGGGCACATCGTAGC

CCGGATCGTAGTCATAGTCCTTTGAGTCCTCCTCCAAGTGGGCTGGAGGCGAAGGCTTACGTTTGGGCA  
>9\_rnd-2\_family-62\_\_RC\_\_Helitron  
CAAAAAGAATACAAAATTAAGTTTAATATAAAAGAAATTCAATAATTTTTTAAATAGAGTTTCTATGTATAA  
AGCTGAAAAGTTTGATGTCTTCGCCCGTTTCTGTGTGTTTTTCTACACAGAAATTATAATGTCATATTCAAG  
GACCACTTTAAAGCGGCATTCTCTGTTGTTTCAGTTTGTATGCCCTTGTAGAGGGTATTATAGTTTTGTGCAT  
GAAATGTGTAACACTTAAAAGGAGGCATCTCTGACTATTTAAATTGTATAAATGTTAGATCAGCATGAAT  
AGAAGAGTTGATATAGTCATGTCCGTCTCTTGGTTTCTATGCGAAATAGTCTCTCAGCTATCTATGTTGAT  
ATTTATGTGCGGAACCAGCTGGATCGGACCACTATATCATATAGCTGGCATAGTTTTATGGAAAACCTTGTTT  
ATTTATCTAATTACATTACACAAGCTTGGCATTTCATAGGTTTTACTGTGCCCCCTTCATATATCTTATATGC  
CAAAATATTATATTTTCAAAGATATTTTTTAACAACCTAAGCATTTTTAATCTGCACTATGCTCACATATCTG  
TCAACGGGATACAAGGGTATTAAATCTTCGGCGTGCCGAAAATATCCTTTCTTTCTTGTTCCTTTTTTTATA  
CCCTGAACCCATTAAAAATGGGTATAAGGGTATATTGTATTTGTGCGAAATCCAAATGTATGTAACAGGC  
AGAAGGAAGCATCTCCGACCCCATAAAGTATATATATATATTCTTGATCAGCATCAATAGCCGAGTCGAT  
CTAGCCATGTCCGTCTGTCCGTCCGTCCGTCCGTCCGTATGTATGAACGCAAGGATCTCAGAACCTATAAG  
AGCTAGAGACTTGAAATTTTAGATGTAGGTGCTCCTAGTNCCC CGCAGATCGAGTTTGTTTCCGATAATC  
GATAACTTACTCCGTTTCCAAGCAATCGATATCGATATCCTGTTTTTTGGGCAATTTTGTTAAATAATAAG  
AGCTAGAGTCACCAAACCTTGACATATAGCTTCTAAAATAGAATATATATATGCATTTGATGTTGGAAGAA  
GAGGGTTCAGGGTATCCCCTAGTCGGGAGCTCCCGACTAGAACCTCTTACTTGTTTTTTATT  
>Ref\_dvir\_625  
AAAATTAACCATTTTTTAAGAATTCTAGATTTAAAATTGGAATATTGCCCAAATTTATCTAGGGGAACAAAA  
ACCGTATAAAAACGTCATTCACATTGAACGGCGGCAAAATATGAGTTTTGCCGTCTGCCTTTTGGCTTAAAA  
AACGCAGGAAGCATTTTTTCAAAGAGCCATCGATGACATCCTGAGGGAACACATAGGAAAAATATGTTACG  
TTTATGTGGATGACGTAATAATCTTTTCTAAAAACGAAACTGACCATGTGCTACATATTGACACAATTTAA  
AACAAGAGAAAACCAAGTTCTTTAAAGAGAGCGTGGAATTCTTAGGGTTTGTGGTGACCCAAAACGGGGC  
AAAAACTGACCCTGAAAAGGTCAGGGCGATACAAGAGTATACTGAGCCGAAAAATCTGTTTCAGCCTGCG  
ATCATTCCTGGGGCTAGCTAGTTACTACAGGGGGTTTATTAAGGACTTCGCAGCAATAGCAAGGCCTCTA  
ACCAATATTCTCAAAGGAGAAAAATGTTTCGGTGAGCAAGCATATGTCACGATTGAATTTGACGAAACTCA  
ACGTAATGCTTTGCAAAGACTGAGGAATATCCTGGCATCAGAAGATGTCATACTTATATACTTAGACTTCA  
AGCACCTCAGACCTAACTACGCCTCAATGGATGGCATCGGTGCAGTCCTATTTCCATCATTTTTATGCACG  
CTAAAGCAAAGCGAGACAGCCGCGAATAATCGAGAATTGTTAGCTATTGTCTGGGCTCTGGATAAACTGC  
AAAATTACCTCTATGGGACAAAAGAAATAAATACTTAACTGATCATCAACCCTTTACTAATGCTGTATCAG  
ATAGAAACACGAATGCAAAAATCAAACGATGGAAGGCCTTCATCTTCTGTCCCGTTACACCTTACAAAAC  
GATATACAGTCAGACGCAACGACTCACAGCGAAATGTCATTCACCTACACGATAAAAAAAACTGAAAA  
GCCAACTGTTTCAAAAATCAAATTGTTATACTGGGGGAGACACAAATTCCATCAAACACGGGAAAAAAAC  
TCCACATTAAAAATCTTTTCACCGAAAAAATAAATTTCTTACTTCAATGGACAAAAATATCCAAA  
>9\_rnd-1\_family-55\_\_RC\_\_Helitron  
TATATATAATACTAGCGGGTATAGCCCGGCCTTGCCCGTGGCACTTATGTTATAAAATCAATGTTCTCGAA  
TAGCTTTGAAAATGATTTTGAAACTGAGCGGACAGTAAACAAACTACTCTCATACAAACGTTTTCCGTCAT  
TTTACCACTGTTTCGAGTGGAATTTCCCAAATCGCTGAAACACGTATTCAATTATATTCTTATATAGAGCTTT  
GAAAATAAGTTTGATGCAAATCGGACACAGCTTAAATTTCTCAAAAAATTACTTTAAATGCACTTTCCA  
CCGAAGGAGCTTAGATTTTGCAAAAAATGTGAAACACGTCTCAAATGATTTTTTATGTAGATCCATGCAA  
ATGAATTTGAAGGCAAAAGGCCACCCACCAAATCTTTGACTCCCATTTCCACCGGGTATGGNCCGGCCTTT  
CGAAAAGCGCGNGACACCTNTCAAATGAATTTTAGCAANGATCTTTGAAAATGAGTTTGAGGCCGATCCG  
ACGGTNAACAAAAAACTTTTCATACAAACGTTTTTCGCCAATTNACCACTGTTGCGGGTGGAATTTCCCAA  
TCGCTGAAACACGTATTCATTAAGTTCTTATGTAGAGCTTTGAAAATAAGTTTGAAGCAAATCGGACANC  
ACTTAAAACTTCGCCCAAAAAATCTTTGAATCGCATTTCTACCGAAGGAGTTTAGATTTTGCGAAAAATGT  
GAAACACGTCTCAAATGATTTTTTCATATAGANCCTTGAAAATGAATTTGAGCGCGAAACGTCACCCACCA  
AATCTTTGACCCCCATTTCCACCAAGGAGGAATACATTTTTTGAAAAGTGTGAAACACCCCTCAAAAATG  
AATTTGAACAAAGAACTTTGAAATTGAGTTTGAGGCCGATCGGATGGTAAACAAAAAAGTTTCATACAAA  
CGTTTTTCGCGATTTTTTCCATACTTGCGGGTGGAATTTCCCGAAACCCCGTCTTAACGTGCACCTTCATCAC  
ATAAGGTAACACTACAGTGAAAATTTAGCTTCTAGCTCTTACGGTTTGGGCTGTGCGTTGATCACCAATCA  
GTCAGTCAGTCAGTCAGTCAGGACAAACAGTTTTTATATATAGAGATATTA  
>9\_rnd-6\_family-1496\_\_RC\_\_Helitron  
TTTTAAAGAAATAACTTAACAAAATGGATGTGTAGTTATTAAATGAAATTGATTGTTTATGTTGATTACA

AAGATATTTTTATANCCNATGCAGNGGGTATTNTGATNCTGCCGTCAAATGTGTAACGCATAGAAGGAGA  
CATCTCCGACCCCATAAATTATATATATTCTTAATCAGCATCAACAGCCGAGTCGATATAGCCATGTCCGT  
CTGCCCCTCNNTCTGTTCAAACTATGCGAGCCAGCCCCTCAGTTTCAAANCTATNTNANTCGAACTTTGA  
AACAGANNTCCGTCTTTCTGCTGCACGNAGCNCATAAACTTCGGAANCCAGCTGGATCGGACCACTATAN  
CATATAGCTGCCATAGGAACGATCGGTTCGAAAATTAAGTTTTTTTTGTATGAAAAACATTTTTGTNTCAA  
GATATCTTGACCAAACCTCGGCATTTATTAGTTTTACTTTGCTCCTCATATATNTGCAAAATCCTATTAAGAT  
CGGACCACTATATCATATAGCTGCCATAGGAACGATCGGTTCGAAAATTAAGTTGTTGTATGAAAAACATT  
TTTGTTTTTTTCAAGATATCTTGACCAAACCTCGGCATTTATTGGTTTTACTTACTCCTCATATATATGCAAAA  
TTCTATTAATATCGGACCACTATATCATATAGCTGCCATAGGAACGATCGGTTCGAAAATTAAGTTGTTTTG  
TATGAAAAACATTTTTGTTTTTCAAGATATCTTGACCAAACCTCGGCATTTATTAGTTTTACTATACTCCTCAT  
ATATATGCAAAATCCTATTAAGATCGGACTACTATATCATATAGCTGCATAGGAACGATCGNTCGAAAAT  
NAAATCGTATGAAAAACATTTTTTGATTATCAAGNTATCTTGACCAAACCTCGGCATACACNAGTTTTACCCG  
GTACTCCTCGNANANNCGCAAGNCACTATNAGCNTTATGAAAAGGTGTGAGTCTGCAAGGGTATTAGATC  
TTTGGCGTGCCGAAGATAGCCCTTCTTTCTTGTGTCATATATATGTTATAGAATAATAAAATGTAATAAAA  
TGATAAAAAAATAATATAAAATTTAAAAATTTTTAATTTTTATTATTTT

>9\_rnd-5\_family-12813\_\_LTR\_\_Gypsy

TCACTCAAATATAAAAGTTCTAATAAACCAAACAACCTAATAAAGTTACACCCATTGACGCAACCAGCCTA  
CCAAAAGAAAAACGAATGTGCCACAGGATTGCGAAGGCCCACTCGACAGCCCCTTCTGCGAATATACGT  
GCAGACACTGCACAGCCAGCACCTCCAAACATTACATTACANCCAACAAATAAACACCTGTGCGAAGACC  
AGCACCGGTACCGCCAGCGCAACAAGCTGTGCCATCGGAATAAGNGCGAGAGGCACACCGCCACTTGCG  
CATACGAGGGGAGCATCAGCGTGCCACATCCGGCGACGCCCAGCTGATGCAACGATGAACAACAGTTGCA  
GCTATATCCTTAACCTACTTTTAATTTTAAATATAAAAAAATTTTTGTAAAATTGAGCGGAAACACCTCCGC  
CCGATTAGCAGCATAGCCCGTAAAGCTATGCGAAATGCTAGGGTAGTATTTTGTGTTATTAGCAATATTGA  
AACCTTGAAACTAAAAACATTATTGGCATTAAAGCTAAAAACACTATATGTTACATAAAAAACATTATAT  
GAATTTAAAAACATTACATCAACTTTTGTAAGAAATTTTAATTAATAATGGGTTCGAACGAATCCAAGGTG  
AAAAATCAGCCGCAAATGTTATAAATAACGTAAAAGTAATTGACCATAAAGAACANTTAGAAAATATTAC  
TATTTTGCTAATTATAATTACTACAGTATCTCTTGATCACTAGCATTGAAAGTGTATGCAATGCATACAA  
AGAAAATTAAGAAACGCTATAGCAGTAGAGCAGACGGACTAGATAAGGTATGAATATATTTGAATATGTC  
AGATATAGAGGCAATCATTAGGTTTACGTATAGAGATGAGCCAACTTTCGTACTCGCGCACTAAACGTA  
CTGCGATTACATAGAGATTTTATAAAAGTGTGTGATTTCGAATACGAATACACGGACATGTTCAATACTCA  
TATGGGTCCATTGATACATTGTTCAAAAATCGAAAAGGGAATCATACTAAGTACGTTGCCATATGTCTCAG  
TAAAACTAGTAAGTGAAGAACACCCAATTTTGGGACCAGCAACGATACTAATGG

>160\_rnd-5\_family-2070\_\_RC\_\_Helitron

ACACTCGGGACTTGCTGTGCTGCCNGTATGCCTAATTNCAGGAGAAAGTGATTATATATATAAGGCTAAA  
TTTTAGACCTTCCTGTTTTAATAAATTGAATGATATAATTTGATCATTGTGAATTAATAAATAAATTGT  
TTCACATAGCGCACCATGTAGTTATTAACATATTTAGCTTCANANTTTGATTTTCCNCAAACCATACATG  
AAGATGNATGTTAGAACNATGCNGAAGACTTTAAAGCNGCTCCGNCCCCANAAAGTGATATACNCCTGN  
TCAGTGTTAACACCTGAGTCCGTGTAAGCCTANCCGACCGNCCGGCCGTCCGTATGTATGACCGCAAGGA  
TCTATTAACCTATAAAAGATATAGTAGTAGTACCCTATGGGGCTAGTTATCGGTCAAATCGATATCGGG  
ACCGTGATTNNTGNGCAAATCTCTTAGGTTTTTAGAGCTAGAGTCACCAAATTTGACAAGTAGCTTCTAGA  
ATAGTCTATATAAATCAAGTATCTTTTATTTTNTAGCTATCCCCAACCCGCTACCACCATATAGCTATAAAT  
CAAGTAAATAAACTAATTTGTATTGCACAACAAATATACGCCACAACCTTAATGCAATTGTNTTTTAGAGA  
ATACANGTATATTCTATATCAATAAGATCTACTACTTGAATTTACATCAAGATCGGTAAAGAAACAC  
AGGAGTTATTAATGAAAATGTGTTTCGGCTGGCCACGTGGTTGGGGCAGCTAGCGCAAATTGCGAGATT  
TCTATATACATACACACACACACACATTTCATGCGCGTCTCATTGAATTCTATAAACAGCATTGCAATTG  
CGATTGTATNGATTTCCGAGNGTGTNTATGTGTTGCTATTTTTATTCAATTTGTTTTTCATTGGCATTTAATTG  
TTGCTTTGGCGGAGAGTAGCGGTATATTACGAGTTCGAATCATATCGGATCTATTTTTTGTGTTGAATTA  
ATTTTCTGCATTTGGTGTTGGTNGAAGAGGGTTCAGGGTATCCCCTAGTCGGGAACCTCCGACTAGGACTC  
TACTTTGTTTTCTGTTCTCTGNAGTGTATGCTAAAAAGAAA

>160\_rnd-1\_family-58\_\_RC\_\_Helitron

ATCTCTATATATAAACTGTTTGTCTGACACTGACTGACTGACTGATTGGTGATCAACGCACAGCCCCAAA  
CCGTAAGAGCTAGGAAGCTGAAATTTTCACTGTAGTTACCTTATGTGATGAAGGTGCACGTTAAGACGGG  
GTTTCGGGAAATTCCACCCGCAAGTATGGAAAAATCGCGAAAAACGTTTGTATGAACTTTTTTGTTTACC  
ATCCGATTGGCCTCAAACCTCAATTTCAAAGTTCCTTGTTCAAATTCATTTGAGGGGTGTTTCACACTTTTCC



AAAAATGTATTCTCCTTGGTGGAATGGGGGTCAAAGATTTGGTGGGTGACGTTTCGCGCTCAAATTCAT  
TTTCAAAGCTCTATATGAAAAATCATTGAGACGTGTTTCACATTTTTTCGCAAAATCTAAACTCCTTCGGT  
AGAAATGCGATTCAAAGATTTTTTGGGCGAAGTTTTAAGTGGTGTCCGATTTGCTTCAAACCTATTTTTAA  
AGCTCTACATAAGAACTTAATGAATACGTGTTTCAGCGATTTGGAAAATTCACCCCGCAACAGTGGTTAAT  
TAGCGAAAAACGTTGGTATGAACTTTTTTGTAAACCGTCGGATCGGCCTCAAACCTCATTTTCAAAGATCA  
TTGCTAAAATTCATTNGAGGGGTGTTTCACACTTTTCGAAAAATCCATTCTCCTTGGTGGAAATGGGAGT  
CAAAGATTTGGTGGGTGGCCTTTTGCCTTCAAATTCATTGTCATGGATCTACATAAAAAATCATTTGAGAC  
GTGTTTCACATTTTTTGGCAAAATCTAAGCTCCTTCGGTGGAAAGTGCATTTTAAAGTAATTTTTTGAAGAATT  
TTAAGCTGTGTCCGATTTGCATCAAACCTATTTTCAAAGCTCTATATAAGAATATAATGAATACGTGTTTC  
AGCGATTTGGGAAATTCCACTCGAAACAGTGGTAAAATGACGGAAAACGTTTGTATGAGAGTAGTTTGTT  
TACTGTCCGCTCAGTTTCAAATCATTTTCAAAGCTATTTCGAGAACATTGATTTTATAACATAAGTGCCAC  
GGGCAAGGCCGGGCTATACCCGCTAGTATATATATATA

>Ref\_dvir\_912

AAATTTACATGTAGCTTCTAGAATAGAATATATACGAACAATACCTTCTCAAAGCTTCTAAAATATTCTTT  
GGTAACGAAAATAACTTGGTGGCAGAAGAGCAACAAAAAAGTTTAAATGCAGTTTTCTTTATTCATTCA  
TTATTTTTACTTCACAAAAAAAATATTCAATATGTTTAATAGTATAAAAGTTATAAAGACAAAAAATTGCA  
CGTGTACTATTCTAGGACTTAAGCTGCATACGATATGCAAAATAAGGTAACAGAGTTTCTGAGATTTTTTT  
TTAAATTTGCTTAATACGTGGTAAGATAGTGTTCAAAATGCCTAAAATTTATTTAAGCATTGGGGAAGGG  
CAGCTAATTTTAAATAGAATATTCGTACAAGCTTAGATAACAGAGTTTCATAATAAATGTTTGTGCGACGC  
GCTGATCACTGGTAGCACTAAAGATAAGTCAAATAAAGTTAGTAGGTGTTGTAGATTACAAATATAACGC  
TGGTTTTGGGTTTTTTTGGTTTTGGGTTGGCTTGTGGATAATAGTGTAAATAATGCGTTAACAGCTTGTACTT  
TCGTTAAAATGCTCATAAAAGTGGTTGTATAATGATATGTCGACATACATATTTTCAGCTTGTACCTAAT  
CATTTTAGTGGTATACGCCAGTATATAACCATAGAGCTATGTAGGCCCATTTTTATATACTCTAATGCTG  
TATATGAATTTACTTCTCCTACCCCTTAACTACAAATATTATTTAGCTAGATGGCAAACCTAGGTCAATTT  
ATCTGACTGCTATTCTAGCTGTCTTAAACGAACGAAATATGAATTTTACAATAGGTAAATAATCTATAAT  
GATTTTGTGAAAATGTATGTTGCAGACAATAAGGTGTCTCCAGCCCCATAAAGTATATGAACGTTAATTTA  
GAAACCTGTAAGGTTTACAAACATGCATTTTCGAATATTGTTGTTTCTAGTGCCCGCACAGTGTTAGTTTG  
CTTAATAAACGATAACTTATTCTCTATCAATATTGGGGGGGTTTTTTTTTTGAGCATTATAAAGCTAGAGA  
CATTATTCAGACTGTCGTTTAGTGTACGCAGAT

>9\_rnd-4\_family-2091\_\_LTR\_\_Gypsy

ATATATATAGTGACATATGTACCACACCCACAACATATACTATAAGTACACATACACTCATGTATCCTAAT  
ACAGCATATATAACATATGTCCACAGCACCTAATGCCAACCCCTCACACATAAGCCCTAGCAACTAAGCG  
CACCACATATGTAACATGATACACCCCAATTTGTAAACAATAAACCCCTAGAGCCCCAAAATCATGAATTC  
TTGGTGAAAATAACAATTCTGGCGTGGGACCGATCATAAAATCGAAAACCAGTAGACATAAACATCCGCC  
ACAATCGTTATTCCCACCAAANGCCCAAATTGCCAACGCAGCACAAATTCAGGCTCTTAGAATATTCTAG  
AAACTCATCAAGAGAATGAGAGCATTGTTTAAAGAGAGCGAGCTCATGATCTTGAGCCCTCAGCCGAGGT  
TTGCTAAGCGTTGACAATATTTTAGAAGTTGAGTTTTACTGAGGACGTAAACCGTCAAGTTGCATCGTGC  
ACAAATTGTAAATTCCAATAAGTCACGCCTGTTNAAATAAAGTTATATTTTTTTTCTAACAACGCGTATTGG  
CTTATGTAATTGGCGCAGCCGGTAGGATNCGCGAGTGATATAAGACCATTAAAGGACAATCGTTGTCCCA  
GGCCTTTAANGCAAATNGGTGCGCGCTGATGATCGACGCGAACGCACAATCATTCGAAAATCGTATCCGC  
AAAAGACACACGCGAAACTTGCCGCGAGTGCCCATTTGACCNTTCACGGATTATAATCCCAGCAATTATCT  
AGTACTCAACTAAGTATTGATCCTTTGGACAATCAGAGTTACTAGGTAGTGAATTTTATTCACTATCTAAC  
AGTGAGGGTGCCCTTGGTCTTGCGCATCCTTCGATTCTTGCAAGTCGCAGTCATTGGTAACGCGCGAAATA  
ACGCCATACCTAAACCAAAGACTACACCAAGAGCAATAACAACAAANAAGTGAANGTGAACATCATGG  
CACAATCAAATGAGCCAGTATTGCAACTTAGTGAGCAACACCTTTCACAAGCACNAGGCCAAATAAGGCA  
AGTGCCAACGTTTCACGGAGCCACCGAGGAGCTAA

>Ref\_dvir\_889

TTTACCGGGCAAAGGAACAAAGACCAAAATACCGAACACTGGACTCGACGAAATTCTCCAGTTAGACAA  
GGAGCAATTGGTAATACTTCGCGTCGATCGACACGCAGACAAGACCCAGTCTACCGGGCAAACAAACAA  
AGACAAAATACTGTAGACCACTCGACTCGACGAGCTAATTCTCCAGTTAGACAACAGGAGCAATTGGCTA  
ATACTTCGCGTCGATCGACACGCAGACAAGACCCAGTCTACCGGGCAAACGAACAAAGACAAAATACTG  
TAGACCACTCGACTCGACGAGCTAATTCTCCAGTTAGACAACAGGAGCAATTGGCTAATACTTCGCGTCG  
ATCGACACGCAGACAAGACCCAGTCTACCGGGCAAACGAACAAAGACAAAATACTGTAGACCACTCGAC  
TCGACGAGCTAATTCTCCAGTTAGAGAACAGGAGCAATTGGCTAATACTTCGCGTCGATCGACACGCAGA

CAAGACCCAGTCTACCGGGCAAACGAACAAAGACAAAATACTGTAGACCACTCGACTCGACGAGCTAAT  
TCTCCAGTTAGACAACAGGAGCAATTGGCTAATACTTCGCGTCGATCGACACGCAGACAAGACCCAGTCT  
ACCGGGCAAACGAACAAAGACAAAATACTGTAGACCACTCGACTCGACGAGCTAATTCTCCAGTTAGACA  
ACAGGAGCAATTGGCTAATACTTCGCGTCGATCGACACGCAGACAAGACCAACAAAGACAAAATACTGTAGAC  
CACTCGACTCGACGAGCTAATTCCTCCAGTTAGACAACAGGAGCAATTGGCTAATACTTCGCGTCGATCG  
ACACGCAGACAAGACCCAGTCTACCGGGCAAACGAACAAAGACAAAATACTGTAGACCACTCGACTCGA  
CGAGCTAATTCTCCAGTTAGAGAACAGGAGCAATTGGCTAATACTTCGTCGATCGACACCGCAAACAAGA  
CCCAGTCTACCGGGGGCAAAAAAAAAAAAAAAAAACAAAAT

>9\_rnd-1\_family-105\_\_Unknown

ATTTTATACCCTGAACCCATTGAAAATGGGTAAAAAGGGTATNATGTATTTGTGCAAATGTATGTAACAG  
GCAGAAGGAAGCATCTCCGACCCCATAAAGTATATATATTCTTGATCAGCATCAATAGCCGAGTCGATCT  
AGCCATGTCCGTCTGTCCGTCTGTCCGTCCGTCCGTATGTATGAACGCAAGGATCTCAGAACCTATAAGAG  
CTAGAGACTGAAATTTTAGCTGTAGGTCCTCCTAGTGCCTGCGCAGATCGAGTTTGTTCGATAATCGAT  
AACTTACTCCGTTTCCAAGCAATCGATAAAAATCGATATCGACATCCTGTTTTTTGAGCAAATTGGGTAAA  
TAATAAGAGCTAGAGTCACCAAATTGATATGTTGCTTCTAGAATATTATATATATATCAAGTATCTTTTAT  
TTTATACCTATCGCCACCTCCCCGCTACCACCNCATAGCTATAAATCAAGTTAATAACCCAACCTTATATTG  
CCCACCAATTTAAGCCACAATTTNAATGCAATTGACTTTTTGAGAATACACAAATATTCTATGGTACAATA  
AGATATACTGTAGAAAATTTTCAATTAAGATCGGTAAAGAAAAATATGTTTACTGCGCACGTGTTTGCGGCA  
GCTAGCGCAAATTTCCAAGAATTTCTGTATACATGTACACACACACATTCATGCGCGTCTGCTTCGAATT  
CTATCAACAGCATTGCAATTGCGATTGTATTGTTTTCTGTGCTGCTATTTTAATTCGTTTTTCTCANTAAN  
ACTTAATTATTGGTGTGGCTGTTGAGTAGAGGCGGCGGCAAGTGGTGCGGTCTGTCGCGAGTTCGAGCCC  
TACCGAGGAACTATTTTTTTTTTTTGTCTNGTGTGGCTGTTGAGTAGAGNCGNCAGCAAGTAATGCGGTCA  
GTTGCGAGTTCGAACCCTGCCAAGGGAACTTTTTTTATATTTATCTTTATTACTTCAAACGAGCGCGTAGC  
GCGANCTGCATTTNGTGTGGAATAAGAGGGTTCAGGGTATTCCCTAGTCGGGAGCTCCCGACTAGAACC  
TCTTACTTGTT

>160\_rnd-5\_family-3283\_\_RC\_\_Helitron

CGTACATCTCTATATATAAACTGTTTGTCTGACCGACTGATCGCACAGCCCAAACCGTAAGAGCTAGA  
AAGCTGAAATTTTCACTGTAGTTAGTTTATGTGATGACGGTTTCGGNANATNCCNNCCGCAACTATGGAA  
AAATCGCGAAAAAAATTTGTATGAACTTTTTTGATCACCATCTAATCGGCCTCAAACCTCNTTTTCNAAGA  
TCCCTGCTTCAAANTCATCTNAGGGGNGTTCCACACATTTTCGCAAAATNCACCCCTCCTTGGTNGATTGA  
ATAGGTGGNCAACGNTTTGGTTCGTCGGGTGACGGTTCGTTTTAGAAGTGTTTCACACTTTTCGCAGAATA  
AAACATCTTCGGTAAAATATGGATAGTACGATTTTTTTTGATAAAGTTTTTAATATTGTCCGATTTGCATTAA  
ATTTATTTTACTGATCTGTTCAAAGAANAAGAACTTANTGAATACGCGTTTCAGCGATTTNGGAATTCAC  
CCACAACAGGGACTAATTAGCGAAAGACAGTTTTTTTTTGCTTATCCTCCGGGCATTGTGAGAATTTATTTG  
TTACGTTCTTGGGTGGCAAATGAAGGTCAGATGTTTAATTAACGAAAAATGTTTGTATGAACTTTTATGT  
TTAGCATCTGACCGGTCTCAAAAAAATTGTTTCAATTCATTTACGGGTGTCTCTCACTTTTTTAGTATCCA  
TTCCTCCTTGGTGGAAATTTGGGTCAANGATTTGGTGNGTGANGTTTCGCGNTNAAATTNATTTCCAAAGA  
TCTNTNTGGGAAATCATTTGGGACGTGTTTCNCNCTATCGCAGATCCAAGCTTCTTCGGTGGAAATTTAA  
GTTTAGCNAAGTTTTAAGTTTTGTCCGATTNGCTTTAACTTATTTTCAAAGCCCTACATAGGAACTTAATG  
ATTACNTGGTTCAGCGATTTGCAAAATCCNCCAAGACTGTNGTAAATTTGCGGNAAACGATTGTATGAGA  
ACTATTTGATTATCGTCTCAATATTTTCAAATCATTTTCAAGGCTTCTTACAAAATTTATTTTGTATGTG  
CCACGGG

>160\_rnd-3\_family-1\_\_RC\_\_Helitron

TTTTTATACCCTTGCAGAGGGTATTATAATTTTGTCTGAAATGTGTAAACGCATAGAAGGAGACATCTCCG  
ACCCCATAAAGTATATATATTCTTGATCAGCATCAACAGCCGAGTCGATATAGCCATGTCCGTCTGTCTGT  
TTCTATGCGAACTAGTCCCTCAGTTTTTAAAGCTATCTTAATGAACTTTGCAGAACTCCCTCTTTCTGTTTG  
CACGCAGCACATATGTGAAAACCAGCTGGATCGGACCACTATATCATATAGCTGCCATAGGAACGATCGG  
GTCGAAAATTAAGTTTTTGTATGAAAAAACATTTTGTTTTCCAAGATATCTTGACCAAACCTCGGCATTTAT  
TAGTTTTACTATCCTCATATATATGCAAAATCCTTATTAAGATCGGACCACTATATCATATAGCTGCCATA  
GGAACGATCGGTGCAAAATTANGTTGTATGAAAAAACATTTTGTTTATCAAGATATCTTGACCAAACCTCG  
GCATTTACTATTTTCCCTGTACTTCTTAGATACGGGCAAAGCACTATGAGCATTATGAAAAGGTTGGGTCT  
GCAAGGGTATTAGATCTTCGGCGTGCCGAAGATAGCCCTTCTTTCTCGTTTTTTTTTCGCTGATGTGGCTGT  
GAGTAGAGTCGACAGCAAGTAATGCGGCCAGTTGCGAGTTCGAGCCCTGCCAAGGGAACTTTTTTTTTATA

CCCTGAACCCATTGAAAATGGATACAAAGGGTAAATTGTATTTGTGCAAAATGCAAATGTATGTAACAGG  
CAGAAGGAAGCATCTCCGACCCCATAAAGTATATATATTCTTGATCACCAACAATACGTCGTTATTGGATT  
AAACGCCTACCTCCTGCAGCTCGCGCCGTCATTGCAGGCATTCTTGAGACTTCCCCAAATACAACATTAAAC  
GCAACTTGCAACAGCCGCTGACGCTGTAATGGATACACTCAGTTATACTGCATGTGATAACGACGCAGTG  
CTTTCACGTAACAACACAGCAACTGAGCATCTAATTGACACCCACATCACTAAGATAGAAAAACGTCTGG  
ATGCCCA

>9\_rnd-5\_family-1148\_\_Unknown  
CAGTGGGTCATTTGTTTTCTGTATATTATTTTGATCTTGTTGCGCTCAGCAGCTAAAAATTAAGTATT  
ATGTTAGCATAACATTTTCAGTTACATATTGCCCTGCGAGGCAAGCAATGTCATATTTTGTGTTTGGCG  
CTTCTCGCATGTCATAAAATAGCTCAATATTATTTGCTGTAACTATCTAGCGCTTATCGCTTTGCGCTCAT  
CGTAGTTTCTGTTATCGCGCTCTTTTACCTTTTGCATTTGTCTTAAGCGGCTAGCGCATCAATGCTAGCGA  
CGCCGCAATGCACTCTTGTCTCGTATGTTTCGCTATATCGGATCTCTTATCGATCGCTTCGCTAAAAATTGTA  
CATTTTCGCATATTGTCAATACGCTCGCTATAAAGCATATAAATAAATCAACCCGTTGCATGAACCTATAAG  
AAAAAGCGGAATTTTTATAACATCCTTAACCTCTCGCTATTAAGTGCTAATAAAAAAGCTTGTTAGCCCAA  
CACATTTTGGTGACCCCGACGTGATTTTTTTTATTTAACATTATAGTGTGTCATAAAATTATTTAAATTAAA  
ATTGAGCTAGTTGTTACTAGTTTCGGCAGCAATTA AAAACCGCTCTTATATACATACATATGTACGAGCAA  
GTGTCATGCGGTAAATTGCAGTAAAGAGGAGTCTGTGTACATAAGCATATATACNCCTACATACAGACGC  
GTTGGCTCTCGCTATCTGCATTTTACTTGTGTTTTTATTCGACTAACTGTTGCGCGCGCTTAAGAGTACAGT  
GCTGACAATAAGTCAACGGTCAACGAACCTTTCGTGTGCAGTTTTAATTCGGTTTTCTTTGACCTTTTTCGTT  
TGCTTCGGTTGCCATGGAAAGTTCTAGTGCNGAATCGCTGGCCACGCTACAAACAGGGTGTCAATTTTAA  
AGCGCAAGGTGGCGTCCTCGTATGAGCGGTTGCAGGCGCTTCAATCTAGCCTCAACCAAACGCCCTTGC  
CAATAATGATGAAATTGCATTGTGCGGTGCTGCTCAAGCGGATTGAAAAATGGAATCTGCATTTCGAA

>9\_rnd-4\_family-938\_\_RC\_\_Helitron  
TTTTATAATTCATAATACGCATTCAAATTTTAATATTAAGCCAATATNAGATGCTGACANATNTATAATGA  
TACTAGCGGGTATAGCCCGGCCTTGCCCGTGGCACTTAATGTTATAAAATCAATGTTCTCGAATAGCTTTG  
AAAATGATTTTGAAACTGAGCGGACGGTAAACAACTACTCTCATACAAACGTTTTTCGTCANTTTACCAC  
TGTTTCGAGTGGAATTTCCCAAATCGNTGAAACACGTTTTTCGCAAAAATGTGAAACACGTCTCAAATGATT  
TTTTATGTAGATCCATGCAAATGAATTTGAAGGCAAAAGGCCACCCACCAAATCTTTGACTCCCATTTC  
CCAAGGAGGANTGGATTTTTCGAAAAGTGTGAAACACCCCTCTAATGAATTTTAGCAATGATCTTTGAAA  
ATGAGTTTGAGGCCGATCCGACGGTNTCAAAAAAGTTTCATACNAACGTTTTTCGCTAATTAACCACTGTT  
GCGGGTGGAATTTCCCAAATGCTGAAACACGTATTCATTAAGTTCTTATGTAGAGCTTTGAAAATAAGTTT  
GAAGCAAATCGGACACNACTTAAACTTCGCCAAAAAATCTTTGAATCGCATTTCTACCCACGAAGGAGC  
TTAGATTTTGCGAAAAATGTGAAACACGTCTCAAATGATTTTTCATATAGANCCTTGAAAATGAATTTGAG  
CGCGAAACGTCACCCACCAAATCTTTGACCCCATTTCCACCAAGGAGGAATACATTTTGGAAAAGTGT  
GAAACACCCCTCAAATGAATTTGAACAAAGAACTTTGAAATGAGTTTGAGGCCGATCGGATGGTAAACAA  
AAAAGTTTCATACAAACGTTTTTTCGCGATTTTCCATACTTGCGGGTGGAATTTCCCGAAACCCCGTCTTA  
ACGTGCACCTTCATCACATAAGGTAACACTACAGTGAAAATTTAGCTTCCTAGCTCTTACGGTTTGGGCTGT  
GCGTTGATCACCAATCAGTCAGTCAGTCAGTCAGTCAGTCAGGACAAACAGTTTTATATATAGAGA

>9\_rnd-4\_family-178\_\_LINE\_\_CR1  
TGAAGCGAACAGGCGTATTTTTTGTGTTGCCTCTCCGTTTTTTTATTTATATTTTCGCGTGTACATGTAAATCAT  
TTAATATTGTTTTTTATGTTTATCGCGAGTGCATTCTTGTGGCGCGCTTGCGCTTAATAAATATTGTTTCTTT  
TAAATTTGTGTTNTTGTGCATTTTTATTTGGTAGCGCTTGCGCCGTTAGCTCTGTGGGTAGGCTTCTTGTTG  
TTGTTTGTGTTTCAATCTTAACTGCGCATCGCCTCNCTGGCGNGCAAGATTTTCGTGAGCAAGCGAACAATC  
TATAAATAAACTACTCTCGACTCTCGCGCTCTCTCGCCTTTTTTCACTTGTGCTTTGATCTTTTTTTATTCC  
GCCGCTTGTTGGTGTCTATACGCTATTAACAATTCTATAACTCTTTTTTACATTTGGCTGCGTTATGTAC  
AGTAGAGACCCATAATAATGGACCATAAAATTTGTCTGCTTCAAAAAACTTGCCAAANGCAAATTACGGCA  
AGTCAATCCAGCATACCTTGTTGGCTGTGTGATAATGTCGTGCATTCTAAATGCGGGTTACGTGGGGGACG  
CTATTGCCAAACGAAATGGCTTGCACTATAGTTGCGACTCGTGTAGGGAGATTGATGGCGAAATGCGNNC  
GTTTATGCGTCAGACCAGGAANGGCTTTAGGGGTCTGATTGTTGGTTTTTCGTAAACTNAACGATCAGCTCA  
CAGCCCTGGATACCCAATTTAACAGCCTAAAAGTGTGGATGAGTCTCCTGGGCCTAAAAAGCACCCACT  
CCTTGTGATTTGCCGTTGCCTAATAACCTTCAGCCTCCGACTGCAATTCAGCAGCCTACNACACCGATTAC  
ACAGCAGCTATCTCGTTTGTACTCCGGTAGCTGTGAGGTCGCTGTGGACNCTGATTCTGTCCCGAAATGT  
GTGACATCGGCACGAGAAAAACCAGTCGAATTATCCGTGTCGTCCGCTGTGCTAGGTGTTCCGAAAGGGC  
GACAGCAACAATTAATTTACAACAGCCGCTAGAAGGCTCGTCGGTCGCA

>Ref\_dvir\_941  
AGGTACCAGAGGGGTGGTGGAGGGAAGGAGCTTGTCTTGAGGCTTTTCCAAACAAATCTCTTCATCACTT  
TCATCATCAGAATATTCCTTAAGAGTTTGCTTGGATGCATCAATGGGGGACTTGGGTTTCTCATCTAATTT  
AGCTTGTGGCTTATCGTCCTTCAATTCAGTCAATGATCAGTTTTCTGCAAGGTCTTGTCTGCAAGTGGCAG  
CAGAGGAGTGGTTGAAGGAAAAGGCTTATCTAGTGGCTTGACAATTCCAAAGTCGTCATCACTCTCATCG  
TCTGAATACCCCTTCGAAACTGTCTTAGCTACATCAGTTGGGGATTTGGGTTTCTCAACCGATTTTAAAGG  
ATCCTTGGGCAACTTAACTTCCTCTTTGATGTGAATATCAACAGACTCGCGTGTTTCACTCACAGAAGTAA  
TTGTGCTTGTAGTCATTGCTACAGGTACCAGGGGTATGGCTGGGGAAAGGAGCTTCTCTTTAGGCTTATCA  
AATCCAATATCTTCATCACTTTCATTATCGGAATATTCCTTAAGAGTTTGCTTGGATGCATCAATGGGGGA  
CTTGGGTTTCTCATCTAATTTAGCTTGTGGCTTATCGTCCTTCAATTCAGTCAATGGTTTAACAATATCGTC  
AGTTTTCTGCAAGGTCTTGTCTGCAAGTGGCAGCAGAGGAGTGGTTGAAGGAATAGGCTTATCTAGTGGC  
TTAACAATTCCAAAGTCGTCATCACTCTCATCGTCTGAATACCCCTTTGAAACTGTCTTAACTACATCAGTT  
GGGGATTTGGGTTTCTCAACCGATTTTAAAGGATCCTCGGGCAGCTTAACTTCCTCTTTGATGTGAATATC  
AACAGACTCGCGTGTTTCACTCACAGAAGTAATTGTGCTTGTAGTCATTGCTACAGGTACCAGGGGTATGG  
CTGGGGAAAGGGGCTTCTCTTTAGGTTTATCAAAATCCAATATCTTCATCACTTTTCATAATCGGAAAATT  
TCCTTAAAAAGTTTCCTTGGATGCATCAATGGGGGAACTTGGGGTT

>160\_rnd-5\_family-171\_\_RC\_\_Helitron  
CTGCTCACGAATAGTTGGCGCGCTTTTTATACNCTGAACCCATTGAAAATGGGTTAAAAAAAAGGGTATA  
ATGTTTTTGTGCAAATGTATGTAACAGGCAGAAGGAAGCACCTCCGACCCCATAAAGTATATATATACTT  
GATCAGCGTCTGTCCGTATGTATGAACGCGACGATCTCAGAACCTATAAGAGCTAGAGACTTGAAATTTG  
ACGTAAATCCCCTTTTTACTTATCCGTTTTNAAGCAATCGATAAAAATCGATATCGANATCCTGTTTTGAG  
CAATTGTGGTAAGTNTNAGAGCTAGAGTCACCAAATTTGNAACGTAGCTTCTAAAATAGATTATATATAT  
GTATATGTATATAAATCCAGTTAATAACCCAACCTTATATTGGCCACCACCTTAATGCAATTGACTTTCTGA  
GAATACACAAATATTCTATGGTACAATAAGATATATAAAAACCCAAAGTTATGTTTTACTGCGCAATTGG  
ATGGGGCGCAAATTCCAAGAATTTCTGTATNCATGTACACACACANACATTCANCCATGCGANTCTGNNT  
CAAATTCTATCAANAGNATTGCAATTGCGATTGTNTTATGTGCTGCTATTTTAATAGGGTTTTCTCTCTCAA  
TAATACCCAATAATTGGTATGGCTGTCGNGTANAGGATAGCATGTNCTGCGNTCTGTTACGGGCTCAAGC  
TCGACCGAAACTTTTTTTTTTANATTTATATTTATTGCTAAAGCAAACGAGCNCGTAGCGCGAACTGCATT  
TGGTGTGGTAGAAGAGGGTNCANGGTATCCCCTANTCGGGAGCTCCCGACTAGAGCCATTCTTTTCATTT  
TACCGTTTTCTTTTTTTCTANNANAACCTATCGTAAATGAATATATTACATATATATGTTTAGTGTGTTTCAG  
TTGTATTTTATGCTTTGCTTTAAAAAGCAACTCGTATAAACGTTTTGTGGTTTAAACAATATTAGGAAACGT  
GTAATGAATACAATGAGTTATATTTAATTGGTTTTTGTTTTCGAGTAT

>9\_rnd-6\_family-18\_\_RC\_\_Helitron  
CGAAGGTATAGTTATGTCTAGCGAGTACTTTGACTTANCGCTATTTATACCCTGAACCCATTGAAAATGGG  
TANAAGGGTATATTGTATTTGTGCGAAATCCAAATGTATGTAACAGGCAGAAGGAAGCATCTCCGACCCC  
ATAAAGTATATTCTTGATCAGCATCAATAGCCGAGTCGATCTAGCCATGTCCGTCTGTCTGTCCGTCCGTC  
CGTCCGTCCGTCCGTCCGTCCGTCCGTCCGTACGTATTATAGCTAGAGAGAAATTTAGATGTAGGTGCTC  
CTAGTTCCCGCGCAGATCGAGTTTATTTCCGATAATCGATAACTTACTCCGTTTCCAAGCAATCGATAAAA  
ATCGATATCGATATCCTGTTTTGGGCAATTTTGGTAAATAATAAGAGCTAGAGTCACCAAACCTTGACATAT  
AGCTTCTAAAATAGAATATATATATGCATTTGATGTTGGAAGAAGAGGGTTCAGGGTATCCCCTAGTCGG  
GAGCTCCCGACTAGAACCTCTTACTTGTTTTTANATAGTATGAATGAAAATAATGTACAATTGAGCGATAT  
ACCCTGAACCCATTGAAAATGGGTATAAGGGTGTAACGCAGAAGGAAGCATCTCCGACCCCATNAAGTAT  
ATATATTCTTGATCAGCATCAACAGCCGAGTCGATCTAGCCATGTCCGTCTGTCCGTCCGTCCGTCTGTCC  
GTCCGTCCGTNTGTATGAACGCAAGGATCTCAGAGAACCTATAAGAGCTAGAGACTTGAAATTTTAGATG  
TAGGTGCCTNCGCAGATCGAGTTTGTTCGATAATCGATAACTTGCCCGTTTCCAAGCAATCGATAATCG  
ATATCCTGTTTTTGTAGCAAATCTCTTTGGTTTAAAGAGCTAGAGTCACCAAATTTGACATNTAGCTTCTAGA  
ATANTATATATATGCATTTGNTGTTGGNGGAAGTAGGGTNTAGGGTATTCCCTAGTCGGGAGCTCCCGACT  
AGAACCTCTTACTTGTTTAAAATTATTTTTATTATTGCTATAGAAA

>Ref\_dvir\_592  
ATAATTTAATGCTAGATGAGATTTAAACGTTGCTACCATATAATCATAATGAAAAACATACATCAACAATT  
TCGAAAGTAGTAAACTAGTAAAACCTAAATATATAGGCTTACTATAATAGTTATGCAATCTTTTCATTTGG  
ATTGCATACATTTTATTCGAGAATTACACTGAGCTCCCAATCTATTGCAAGACGTTGTTTCCATGCAGTTA  
CCAATTTAATGTTTTTACGTTTTTCAACGTTTTCCATGGTTTTCCCATATACTGCAAATTAAAAAAATCTTT  
TTCGAAATTATCGCCTGCGTTCAATGATATGTATTAATATCAATATATTTTCTTAACCAAGGAGACTGCTT

AAACCGTAATATACGGTAAATTTAGTTAACCGCAATCCATTATGAATACATTGTTGAAGATTTCTATAATG  
TATGGGATATTTATATTTTCGGTCTTAGGTCAGCGATAAGCTTTTTTAACTGTACACTTTGCAGTCGGTTTTTG  
ATTGCTTGGACAAAACGGCAAGTCGTTATACATATCATGAAGGGATTGGTTATTCTAAATCTACTTCAAGA  
ATATATCCATATTCAACGTTTCAGAAATTGAAAATAAATGAAATGATCGTATTTTCATCCTCACTTAACCAC  
TGGAAATCACCATATGGAAGATATTGTGACATCGCCACCCATATAGATTATTTAAATCCAAATACATTAA  
ATATTGAGAGGGTTTTGTGCTATCATAATCATTCATATACTATGATTAGCAATTGAATATCTCACCATTTTG  
TATAAATCTTTTGCATATCTACTTATATCTGTAAATAATTCTAATTCTATTCCCTGTTAATTTTAGCATAGCA  
TCCCAAGATTACCCCGGAGCTGTGTAATAATGGGCTCGGTCCAATGAATAAATATTCTCGCAAACATAAAT  
GGAAATTTTCGAAAACATCTGCAAGCAAAAATATATCTGTCTTTAAATACAACCTCTATATAATCTTTAAGG  
GTTTTACAATTA AAAACTCTCCACACGTTCT

>Ref\_dvir\_931

CCGCTTGATAGCTGCACAAATCATGCTGATTTGAATGGGAACCACACTTTTTATAGCCGCTGATTTGATCA  
GATGAAAGCACTGGAGCATTCATATAATCATTATAGTCTTCGACGCTTGTTTTTAGCATATATTGTAAGAT  
GTCTTTTTTCCTGACATCCGTACGTAATTATACGTTTGCCTTTAGTTTTTTCGCGAAGCCATCTTTTAGTTGA  
GTTGTAATCGTCCTCACCGATCTCCACGAGAGCACTGCATCTGCCCGTGAATAGGTTTGCTGAAGCTTGT  
TTAAGTCCCTAAAGGGGTATGGAGGTTTTATTTCGAAATACTCGATCGAGCATGGTGTCCGGTGTAAGAA  
GATTCTTTGACAATAATCTCACATTGTTTTCCGCCAGTAAATGTAAGATATATGACAGCGGTATTAATTTT  
CTTGGGATCGCTACGAATACATCCGATCGGTATCAGACTATGCGTTGAACTAAAGAGGTTAACGGTGAAT  
ACTCAACCAAGCGGTCATGGATAAGTAGACAGTAAGCATCACATGTTGAAGTATTTCTGTTGCTAAGTCT  
ATAGAAATTCGAACATCAATGGGTCCGGTTTTAACTGCCTCATTCTGATATGATAAGTCCACAACAACAT  
GGGGGCATTTTGTTCAAATTCCTTAGGTGTTAGCAGTGGTTGAGGTTCTTTCATATAATAGCTTCTTGAAAT  
TAGCGTACATATCATACAAAACAGCAAATCGTCCGCGCTCAAATTTAAATTTAAACATATGTTTCTGAGT  
TCAAATGAACTTTTAAATTTAATAAATTGTTTGTAATCATTTTTCCCTCCGAAATAAATACGAATAATGCA  
AATCGAGGATGTTCTCTATTAGCTGCTAGCTTTACATTCCAAGTGTGTTGAGCGCCAACGTGTGAGTGATGG  
ATTCATATAACAGTCCCAGCTGCAGAATGCCATTGGGAGAGAGCTTCCAATTTTTTAACCACATTAAACATT  
TGCAGTTTTGC

>Ref\_dvir\_662

AGGATGATGAGAGAAATAGAAAAATGAGAATTTCTCAAAATCTGTACCGATGATTTTAATGAAATAAATA  
GCAAAATGATTGATAAATCGTGCTCTATATGCACAACCTACCGTGCATTTGGGGCCGTTTTTCGGAGAAATTA  
AATAATAAAGTTTAAAATATGGCTGCCATTTAACAGTATGATATATAATATTGCCAGCTTGTTTTTTTTGC  
ATTAACATAGGATGTTATGAGAGAAATAGAAAAATGAGAATTTCTCAAAATCTGTACCGATGATTTTAAT  
GAAATAAATAGCAAAATGATTGATAAATCGTGCTCTATATGCACAACCTACCGTGCATTTGGGGCCGTTTTC  
GGAGAAATTAATAATAAAGTTTAAAATATGGCTGCCATTTAACAGTATGATATATAATATTGCCAGCTT  
GTTTTTTTTGCATTAACATAGGATGTTATGAGAGAAATAGAAAAATGAGAATTTCTCAAAATCTGTACCGAT  
GATTTTAATGAAATAAATAGCAAAATGATTGATAAATCGTGCTCTATATGCACAACCTACCGTGCATTTGGG  
GCCGTTTTTCGGAGAAATTAATAATAAAGTTTAAAATATGGCTGCCATTTAACAGTATGATATATAATATT  
GCCAGCTTGTTTTTTTTGCATTAACATAGGATGTTATGAGAGAAATAGAAAAATGAGAATTTCTCAAAATC  
TGTACCGATGATTTTAATGAAATAAATAGCAAAATGATTGATAAATCGTGCTCTATATGCACAACCTACCGT  
GCATTTGGGGCCGTTTTTCGGAGAAATTAATAATAAAGTTTAAAATATGGCTGCCATTTAACAGTATGATA  
TATAATATTGCCAGCTTGTTTTTTTTGCATTAACATAGGATGTTATGAGAGAAATAGAAAAATGAGAATTTCT  
TCAAAATCTGTACCGATGATTTTAATGAAATAAATAGCAAAATGATTGATAAATCGTGCTCTATATGCACA  
ACTACCGTGCATT

>9\_rnd-1\_family-472\_\_Unknown

TACAATACCTTTCAAATTGTAACAGTAACAACACTTTGCATAATTATAAGTGCCATAATATTGTATATTAT  
TTATAAGTTCAAAGCATTACCCCAAAGAATAATTGTCAAATATAAGAAACAAAAAGAAGAACCAAGA  
ACCAATTAATATACAACCACATGAAAATATTATAAGCAGCACCAACTTAAATGAAACCGATAATATTGNA  
ATNAGCAATAATCCAACATTATACCCGAAAATGTCCGCCTGAGGACAGGCTAATTTCTTAGGGATGGGGA  
AGTGACATATGTACCACACCCACAACATATACTATAAGTACACATACACTCATGTATCCTAATACAGCAT  
ATATAACATATGTCCACAGCACCTAATGCCAACCCCTTACACATAAGCCCTAGCAACTAAGCGGCACCAC  
ATATGTAACATGAGACACCCCAATTTGTAACAATAAACCCCTAGAGCCCCAAAATCATGAATTCCTTGGTGA  
AAATAACAATTCTGGCGTGGGACCGATCATAAAATCAAAAACCANTAGACATAAACATCCGCCACAATCG  
TTATTCCCACCAAATGCCCAAATTGCCAACGCAGCNCAAATTCAGGCTCTTAGAATATTCTAGAAACTCAT  
CAAGAGAATGAGAGCATTGTTTAAAGAGAGCGAGCTCATGATCTTGAGCCCTCAGCCGAGGTTTGCTAAG  
CGTTGACAANATTTTAGAAGTTGAGTTTTACTGAGGACGTTAAACCGTCAAGTTGCATCGTGCAAACTG

TAAATTCCAATAAGCCACGCCTGTCNAAATAAAGTTATATTTTTTTTAAACAACGCGTATTGGCTTATGTAA  
TTGGCGCAGCCGGTGGGATGCGCCGGTGATATAAGACCATTAACGGACAATCGTTGCCCCAGGTCTTTAA  
AGCAAATCGTGGTCGGCGCTGATGATCGACGCGAACGCACAATCATTNGAAAATCGTATCCGCAAAAAGA  
ACACACGCGAAACTTGCCG

>160\_rnd-6\_family-2217\_\_RC\_\_Helitron

ATTCTCAATTTTCAAAAAATCAAGCTGCATAGTAGCATTTTGTGTATGGCGTTACTTATCTAACTGTTTAT  
ATTGTCTTTGGTACAACGTATCCCCTAGTAGGGAGCTCNTGGCTNGAACATCTTACTTGTATACCCCTTGC  
AGAGGGTATTATAATTTTGTCTCGCGAAATGCGTAATCCATAGAAGGAGACATCTCCGACCCCATAAAGTAT  
ATATATTCTTGATCAGCGTCAACAGCCGAGCCGATATAGCCATGTCCGTCTGTCTGTTTCTATGCGAACTA  
GTCCCTCGGTTTTAAAGCTATCNTAATGAAACTTTGCAGATCGCTTTCTTTTGCCAAAGCAGCATATATGT  
AAAAACTGGCCGGATCGGACCACTATATCATATAGCTNCCATAGGAACAATCGGTGCAAAAATAAGGTTTT  
TGCATNAAAAAACATTTTGTATTATCAAGATATCTCGACTAACTCAGCATTTATTAGTTTTACTTTACTCCT  
CATACATATGCAAAATCCTACTAAGATCGGACCACTATATCATATAGCTGTATAGGAACGATCGGTGCGAA  
AATTAAGTTTTTGTNTGAANAACTTTNTGTTTTTCNAATATCTTGACCAAACCTCGGCATTTACGAGTTTTA  
CTATGCTTCTCATATGTATGCCGAATCCTGTCAATATCNGACCACTNTATCATATAGCTGCCATGGGAACG  
ATCNGTCGANCGTTAAGTTCTTGTNTGAAAAAGCATTTTGTCTTATCAAGATATCTTGNCCAAANTCGGCAT  
CCACTATTTTGTATTCTNACTACTGTAGCTGTGAGTATGGTCGGCAGCAAGTAATGCGGCCANTTGCGGGT  
TCGAACCATGCCAAGGGAACATTTTTTTGAATTTATTTAGTGTTGGAATAGGAGNGAAATNCAGGGTATN  
CCCNAGTCGGGCGCTCCCGANTGGAACACTNTTANTTGTNATATCTATCCTAAATCATTCGTATTATTCAG  
TTTTCTC

>Ref\_dvir\_920

TAAGAGCTAGAGACTTAAATTTTTAGATGTAGGTGGCTTCTTATAATAATAATGTGATGTTTAATATGTGA  
TTATAATTATAAAGCTAAGTAGCGGCGCGCAGTTCGATTATGTATACTAAATCGTGGCGGTAGGAGAGGG  
AATATTTCCGAACACTTTCTTTCAATGTGCTCCAAGAAGCAGTAATCGATTAGTCTGTAGCCTGCGATGCC  
ATCACACTACCACTAACCCAAAGGGTACAAAAAAGTTGTGCCTTTTGGTGCCTGCCTACCTGTCCAATGCG  
CATTTGACTTTATTTTGGGATTTCTGATTTACGACACACACACCCATAAATGTGTGAATGGGCAGATCATG  
GGTGCATGACCTGTATCTGTATCAGCATTTTGGGCCGAAAGGGTCAACTTATGGAAAGCACCTGCATCTGC  
ATCTGACCAGCTGCAAATTCATAAATTTGCCATAAAATCTGGGAAATCAAAAACAATGTTTGAAAAACTA  
CTAAACTACTACAAATTAGACTTTCTGTTTTATGCTGTTTGGCTAGTGACACTACAGAATTTTGCCTGTTG  
TCGATTTTTTGCCTTTCTTACTGATCTAACAACGATTTTTTATTCAAATAAACTTTTCTATCGGGTTCAAGCGG  
TTGAAAATAAATAAATTGAAGTGTTTTGTGACCATTTAAAAAAAAGAAGTGAATTATCGACAAACATAA  
TTTTCGACCGTTACAATTTGGCGTGTATGTGCAAGTATTTATGCACTTATGCGAAATAGAAAAAATCTCAA  
GTTCTTAAACATAACTTTAGTTTTAGTCTTTTTTTTTTAAAACTATCCAGACATATAACAAAATAATAAATAT  
AATATAATCAATACATACATATAGTATAATTTTAAATAAATTATATGGGAAAATAATTTATTGGAAATTAA  
TTAATTTAAATTACAAATTTTACTATATGACATTTTTTATGCCCTGCAGAGATATTATAATTTTGGTCGTGA  
AAT

>160\_rnd-5\_family-4736\_\_LTR\_\_Pao

GTTTCGAGATTGCGCACTGGACATTAAGTTCGAAGCNAGTTAAACAGGCGCTAGAAGACGGCTGCGAGGA  
TTTGACAAAGAGAAGGTCCTGGGCCTGTGTGGCTACCTGGNCAAGATCTGTTGACNTTTGTGGTGAAGCC  
GAACTTGCTTGCGAAAGCATCTAAGGAGCGCCNAATTAAGAAGCGTTCTAAGCGTGGTCATGTCTATT  
TTCGACCCGCTCGGGCTGCTAGGATTCTTTAATATACGCGCCAAGATCATCCTTCAGAACATATGGCGACC  
CAACATCGGGATGGGATGACGACCTACCAACGAAGACGAAGCCGATTGGCGACACTGGCTAGATCTAG  
TTTCAAANTTGAATGCCGTCCGCATTCCACGGTGTATGAAGTGGGTGAGCCGAACCCAGACTGTACAGAT  
GCATACATTTCGTGGACGCCAGTATTAATGCTTACGCCGCGAGTTGTATTTTTGCGGGCTGAACTCGATGGCC  
AAGTACATTGCAGTTTGGTCGCCTCGANAACGCGNATGGATCTGATGCCCCGCTGTCTTAGNTCTGAGACTG  
CCCTAGATCTGAGAGGAAATGTATCCAAAAGGAAATGTGCGGTACGCATACATAGACGAACATTTTGGACG  
CATTCGAAGGTTCCAGCGATTTCGTAGCGCTNCGCATCGGAAAGATTTTAGAAGAATCAGATGTGGACAGC  
TGGCGCTGGGTCNCATCAGCTCAAAACGTGGCAGACGATGGCACGAANTGGACCCAAGCCACCATTTTTG  
TATTTAGAAGAATCGCAGTGGCCACACACGGAAATAGGGCCCTGCAATAAACATGTTGTACCATGTCTGAA  
GAACAACCAATCACACGTCGTCCTGGAGATGTATCCTGCCGGATCTGCAGCGCTTCAGCAAGCTGGANA  
AATTGAGAGCCGTACAGCTATGCGTACTGGATTTCTACGGAATATTACTAAGAAGATCAGATTGGACGG  
GCGATT

>160\_rnd-5\_family-3380\_\_DNA\_\_hAT-Blackjack

TCAGTGTTGCCANTTCAGATTTTTTCCGTCAGATNTGGCTTTTTTGAAAGTCTGACTGCCGGAAAAAATTG

AAAACAGCGGGCAGCGGGAATTCTGGCTTTTTAATAAGAAGATTAAGTGTGTTTTTCGCTTTTTTATAACA  
AATTTTTTAATATTAACAAAAATGTGTCTAACTTGAAATGAGCGAAAGTGTGTATCATTATTGAAAGGA  
AAGCGTTGGTGTAACTATCACTATTGGTTTCANATTGCTTAGTGCGATTTACGCGCGNCGCACACCACTAA  
GGCAATGAATTTCACTNGATAAANTTTTGACTTGTNAAATGNCGAAAGCTGTTTATAAGCGAAAAGT  
GCGTNAAGTACCGAGCTTANAAGCTGGCTCGGCAAGGATGTTACTGACGATACANGGGCTTATTGCAGCT  
ATTGCAAAAGCAATATAACGGCCAAGTTATCCGATTTAAAAGCACATGCAGCCATACAACATTTAAGTAT  
GGTTGGTGGACATACNCAAAAAAAAAAAAAACAAAATAGATTTTGCANNTGTAGCCCAAAACACTGCAGTGG  
CTCCAGTGGATCACTTGAGCAGTTTGTATGCTATGCAATTCGATGACAGCAGCACGGCTAGCCGAATANA  
AATGCANCGAANCAAAATGCACAAATATATTTAAAAATGCTTTGGCTCCTCATTGTGGTTCCCTCATTGCTG  
TTGGATGAAACAACAGACAGAAATTATTTGCATTTAGATGAGGATGAAAATCTGGATTATGTAATAAACA  
TCTTATNATTATNTGCTTTAATTAATTTAATTATACGAATTTTTGAATTTGTTGTATACTCTATTACTTTTGA  
AAATATCAAACAAAAAATACCTTTAATCAGCTTTTTGTTTCAGCTTTTTTTTTAAACAACATTTGACTGTTTTG  
CGCTTTTTTAAAGCAGATCTAGCTTTTTTGGTTGCTCAATAAATGGCAACACTA

>9\_rnd-1\_family-467\_\_Unknown

CCCAGCGGACCAACACGCGAGCCTTTAGAGAGAGTCTCGCAAAATGCTCACAAATGAGCTCGCATGTGAG  
CAGAAAACGAGTGGGATATATTTTTATCGCAAAACACTCGCACACGAGCGTTGCAGTGAGATCCTTGCG  
ATAAAAATGCGTGCACAGTAGAGAGAATGGTGTGTTGTTTTGTTTCAAATGTTAATCGTGCTCAGAGAGT  
GCAACATTGTCATGAGAGCGAGAGAGTAAAAACGACGTGGCATTCCGGATGCTGTGTTGTTTTGTTGTTTT  
TTTCCTACTCAGACCGTTTTTTGGTGGTTGAAAACTCCTTTGTTCTCTTTTCTATTGTCCGCCGAAGCGAG  
CAGACACGTGGTCAAAGTGATAAGTGATTTGTTGAAATTTGNATTTCTATAGAGAGGTAAGTAATTAACA  
AGTGTAATTAATAACTAACTATTCCTTTTCAGAATATATTTAAATAAATATACAAAAAAATNAAAACA  
CATTAAAGTTTTGTTTTAAATAGTTGTAAATAAAATTATTTTATATTATGTATTCATTTTTTATAATTATAAG  
ATTGCTTTAAAAATGCCTTTTAATTTTAAGTTAAATTAATGTTATTTATTTTTAAAAATACAATTTGAATTA  
AAATGAATATTAAAAAAAAAAAAAACAGCAACAAACATTTTTATGGGAACAAAATGGGCATGGAACAAAA  
AAAGTTTCGCAAATCATATTTTCATGAGAGCCTTTTGCGATATCTTTTAAAGAGAGTTTTTAAATATCACAA  
AACGCTCGCTAGTCGTATTTCTTGCGACAGTCGTAAATGAACTTTGACGGCCACAACTGAACGACATA  
TGATTCATATTGCTATCGTTTCCCGATGTGTTTGCGAGAGTTTTGTCGGGCAAAGTCTCGCATTTTACCAGT  
TTGCGATATCATTTGAGACAGTTTGGTCCGCTGG

>Ref\_dvir\_586

ATTTAAAGCAGAAAACCTTATTTTAAACTATGTTTTACACAATGCCAAAAACAAATCCGTCTTCTACGAATT  
TGTTGGAGGTGGTGCGGGTGTCGGAAAGAGCCGACTTATTTTAGCTCATTTTCAATCTTTGTCCGTTATGT  
ACAATAGTAGGCCAGGAAGTGATCCAAATTCTCCTAAAATAATATTGTGTGCTCCACAGGTAAGCTGCTTT  
CGGAATCAGTGGCTCAAACCTGCATCCATGTTTTCTTACCAGTAAATCAATCTGGTTCCGATTTGAGGGCT  
TTAAGTAATGATTTAGTAATACTTTGCATTCAAGGTTAATCGACCTTAACTAATTATTATAGATGAAAT  
ATCTATGGTAGGCTCCAAAATGTTTTCCAGTTGGACTCCCGTTTAAAACAAATTTTCTTCTCCATTCGGTG  
GTATTTCTGTCATAGTTTTCGGGGATCTACGACAATTATCTCCAGTAGGTCCGTTGCATTTTCAATCCAAC  
TTAATGATCCCTACAGTGCAATTTATGCTTCATTGCTGTGGGACCTTTTCAAGTATTTTGAACCTCAAAGAA  
ATAATGCGTCAACGGGAGGACCAACCGTTTGCTTCTGCTTTAAATAATATGGCATCGGGAAACATGACAG  
CCGATGATATTAGTCTTGTCCGATCTCGCATTTGTGTCAGCAATCGGATGTGCCCGATGATGCCATTCATCTA  
TTTAGTACAAATGCGGCGACAGATAGTTATAACACGATAAAGCTAACTCAATTCCGACTGATCAATTTA  
TTTCTACCGCTGATGATTTTATAACTGCGGCTTGAGACAGAGAATATATGATTACGGTCAATGTAGATAC  
GGGGGAGGGATTAGTTAATGGGGGCAACAGGCATGGCTAATGCAAATAGATTTTCGATGCATCCAGCACTC  
CCATTATTTTATGGATGAAATTTTCAGATGA

>Ref\_dvir\_533

CACAGAAAAATTCCTAAGCGGCATTTGCGAGATTTGTGGCACGACGAGGGTGCCCAAGTCATATGCATTC  
CGACAGCGGCAAAACCTTCGTCGGAGCGGCCAAAGTCCTCTCGCGCGATTTTGTAGACTAACTCCAGGC  
CACTTACAGTCTCCTGTCTAGCACTTCAACCTCCTAGTGCACCGCATATGGGTGGCCTGTGGTAGGCAG  
GTTAAAGAGTTTCAAAAATCGACCTCCAAATACACCTTCGAAGAGCTTTCCACGCTCCTATCCAAAGTTGA  
AGCATGCCTGAATTCAGACCGATATCTCCAATGTGCGGAAGATCCTACTGATCTCCTACTCTGACTCCCGG  
TCATTTTCTAGTCGGGGGTCTCTACTTTCCGCCACAGAGCCAGAGATCAAGGAAAACGCCGCGTCCATCA  
TCAACCGCTGGCAGCGCTTGAAGGCTTTGCAACAACAGTTCTGTCTCCGTTGGAAACATGAGTATCTTTTA  
GAGTTACACAAAAGAAACAAATGGCAAACTCCAACGCGAGACTTACAACGGGACGATCTAGTCATTATTA  
AAGAAGATAATCTTCCAGTTAATGACTGGCGTCTAGGTTCGAATCCAAACGACCTATCCTGGCGACGACCA  
AAGAGTCCGAGGGGTGCGACGTGTTAACAGCCCCGAGGTGTCTCCAAGAGACCTATCTTAAGCTGATCCTG

CTCCCGATCTCAATTCTTCATTCTCTATTCTCCAGTAGAATCTCCAGTAAAGACTAGAATACTAGATAAAAT  
AGGTCTGCGGACCATCCGTATAAAGCCGCATCAGTAATGTCTATTATGTTTTTTTTTCCATCTTTTTTCACGTA  
ACAGCACGATGTCTCCACGCCAACACATGGCCGATCTAAGAGCCGCCTGGCAACGGGATCGTTCTGATG  
CCGAGTATGTCTAGAAGTCCACGCGCTACGGAA

>9\_rnd-5\_family-2110\_\_LTR\_\_Pao  
CGGCAACGGAATCGTTCCGATGCCGAGTATGCCGAGTCCACGCGCTGCGNAAGTGCCAGCGGTTTATGCG  
GCTGTCTCCAGAGAAGAGACTCCGAGTAGTTCTGGTCAACAAATACTGCGCAAACCTGCCTGNCTCACCAA  
CATTCCGGGGAGTCCTGTGCGCCGCAAGGTCAAGTGCCGNAAGTGCCAGGGCGACCATCACACCTTGCTTC  
ATTTCCAAGAAGCGCGTCGCATGCCATCGCGATCTCCAGAGCGATCCCAAACAAAAATGCGCACCACCAA  
GGCCCAAGCGCGACGCTCCGCGCCGCCTTCATCCGCGGGCTCCATCTCTTGTCTNACCTTGATGGAGCACA  
AAGGACAACCGTGCTCCCGAGAGCACTAATCCGACTTGGAACGGCAAGGCGACCCGCGACACTCGGGC  
ACTTTTAGACCCGTGCTGTCCGGTAAGTCTTATCGACGCATCTTTGGCAAAGGCCTTCGGGCTATCCGTCA  
CCCGCGTCGGTACAGACAGCGCTTGTTCCGGCCGTTCATCCGTTCCAGGACCTCCAGCTTCCAGCGAGAGGTC  
ATCCTGCAGGTGATGCCTAACCTCCGGTATCGGACTCCANCGAAGCTCGTCAGCGAGAACTGAACGAGC  
CTTTCAACAACGTCCGATTGGCAGACGATCGCTGGTTCCAGCCGGAAATCTCCAATCTGGTGTGTTGGGCTCG  
GATATCTACCCNGACTTAATTCTCCAAGGCGTCTGCGCTACCCGGTAGGAACAGAGCCACTTCCCTCTCCCTTT  
CTTTTTGCAATACTGCAAGGCGGGCGGCATGTTACACAAGAAGTGTATCCGGCAGTCGCTATCCAACCG  
CCATGTAACCTCCGGAACCAAGTACATGGAACATG

>9\_rnd-1\_family-118\_\_LTR\_\_Gypsy  
AAAATAATTAATTTTCATTAATTAATAAATAACTACATTATGTTACGTTATTTCTCTAAAAGGGAGGTGTAGT  
GTGTATATGCCTTAAAAGAACACCCTATATACAAATATAAAGTATGCGGCACTTTGTGCGATACAATAAC  
AATTATACATTAACAAGCCAGAGCCACTTTATATATTGGCTCTGGCTCATATTACGCAGCGCAGTTTAC  
TAGCCTCTCATGCTTACGCTGCATTTCCACGCTCCGTCTGAGCGCATTCCATGAGCAACATATATGCTCA  
CTAACACAGGCATATGCAAGCTACTCACTCTCCCTCTCTTTGTAGCTGTTAACCAATAACAGCATAAGTAT  
ATACATGTATCCATAGGCTAAGCGCAATATTTTACTTTGAATAAANTCATTCTGAAAACCNAAGTCAACCA  
GCACTGACGTGCTTTNTTAAATCATTATTGAAAATAAACATTACATGGCGACCGTGACTTGGTCACGCATC  
CCTGCCTGGAGGCAGTAGACCAAGTGAAAAGGAACCTTCATGGCCAACAAAGAGGCCATGTATAATATAC  
AATTTGAAAAGGAACCTTCATGGCCAACAAAGAGGCCATCTATAATATCCAAGTGAAAAAGGAACCTTCATG  
ATCAACGAGAGGCATCCCGTATTCTGAGTGAGTAGAGAGTGAGTGTTATGGTTCATAAACGCGGTGGCTT  
AAAAAATAAAATTAATAAAAGAATAGCGCACCTAAGGTGGCTGCTATACACAAAACAGCCAACACCCGC  
ATGGTCGACAGCTCAGAAGTTACAAAATGAGCTCGACTATCTGCAAAATNAAATTAAGCAGAGAAAACC  
AAACACCACTACTCACTCAAATATAAAAGTTCTAATAAGCCAAACAATAATGAAGTTACACCCATTGCC  
GCAACCAGCCTACCAAAAGAAAA

>Ref\_dvir\_710  
CCGGGAATTCCCTTGAAGGAAAATGGTGAAAAATCCTTTTTTTGAGACGCCGCATAGGTGTAGGCGATGTG  
ATGCTCTGCAACCAGATTACAGGCCTTTAGGCAGAGTTGAGTTGCTGACATACCATGGATAGTCGCTGATTA  
AGCGCAATGTTTTTTTTTGCATGATTTGCACTCTCTTTCATTGGGACTGGGCAGCAGTTTCCAAAATCGGAA  
TGCCGTGCATCCATACGGGAGCAACAATGCAATTTAGCCATTTTCAAGATTGATATTTTGGTACGGCAACTA  
TTAACCCTGACTTGAGAGATATGAAGTTAGCCTCTATTCAAAGGGTCCACATCTTAGCCCAAGTTATCTAG  
AAAGTGAAAGGTACTCCTGGATACCATCTGCAGCTTCGTACTCGCAACGGAAAAAGATTCCGACATCATCA  
GCGTAGGTAACCATCAGTTTGCCCGGATCAATGCACCACTTGTTTCATGCTGGTGCGACCAGTCGCTCCCAA  
ACCATCGCTATCGACGGCAGGACACTGATCGGCCGATAGGACGCAGGTAGGCTTTATGGTTTGTCTGCTT  
CTGTACTTTGGTAGCTGAGATGCACCTCCAAAAATTGCACGTTTCGATTTTCGGTCAAGTTGTCTTGTGGTC  
GAACGGCTTCGGTCTGCTCTACAGACTCGTAACTCTCACTTTTCTCTTCCCTGACCCTGGGTCGTATGGATAA  
TACTCTGCATGGAAATTACTCACGGTGATAAAACTTGCTAAGCAAAGTAACAGAAAAAAATCTACAAATA  
AGAAGTGCATGGAATCCCTGAACCGGATGTTCTAAAAAATTGTGTTGCTAGTCTGCAGAGCGACGACTTG  
TTTTCTGACTAATCGGGCTATTTACTTGGCTGAAGTATTAACAATTTGCCCTGGTAATTTAAGATTATCTGT  
TGATGTCGGAAGTCA

>9\_rnd-5\_family-219\_\_RC\_\_Helitron  
TGTATTTGTGTTTTTTCCGTATATATATATTTTGCTGTGAATATTTTATGGATTTTTTTTAATAAATTTATTTGT  
TTTTTTTTTCGTATATTTATTTTTTAAATAATTTTATGTTTTTTTTTAAAGACTTTTATGATTTTGACATTTTTA  
TACAGGATCTGCTCTCTTAAGTTTTTTAGTGCTTTTGTGTTGTTTTCTTCATTTGTTTGCTAAATATAATTTAC  
GACATGTTTTTACAAAGCGTTTCTAGATGAAATATTGTATTTTTTTTATACCCTGAACCCATTGAAAATGGG







GACTGCATGTTGTCCAAAGGNCATCAGAATGGTCCTTGAGGTGGCCAAT  
>160\_rnd-1\_family-307\_\_LINE\_\_I-Jockey  
AAAACCTCAAGCGCCAACCCTGGAGAACCGTTCTCCTTCTTCGCCACAATGGAAAATACTGCCTTAAAGA  
CGAAGAGCAAGCTGATACCTTCGCCAGCCACCTGGAGGAACGGTTCACACCTTTCGATTTGGCCTCCCCG  
GAAGAGATCGATGAGACTACCCGAGCGTTGGAGACTCCGCTTCAGATGTCACCACCTATCGGCCCCATCC  
GCGTGGAGGAGGTGATCAACGTCGTCAAAGCCCTTCCCAGGGGCTAAAGCACCGGGCCATGATGGAATATG  
CCACACCACTCTGAAGGCCCTGCCAATGCGCGCGCTCCTTTTTATAACGTTGATCTTTAACGCCATATTAA  
GGACGCAACACTTCCCTGCCAGTGGAAGTTAGCGAGGATCCGTATGATCCATAAGTCGGGCAAGCCGGA  
ATATGACCCTGAGTCATATCGGCCGATCAGTCTCCTGCCTTCCTTGTCGAAGGTCTGGGAAAGACTGATTG  
GTCGCCCCGACTTGCAAGGCTTATGGATCAAATGGCCATTCTTCCTGATCACCAATTTGGGTTCAGGGGTGG  
GCATGGCGCTGTTGAACAGGTTACAGAGTGATTAACCATATTCTTAAGGCTTACGACGACAAAAGACTAT  
TGCTATGGAGTCTTTGTAGACGTTAAGCAGGCCTTCGACCGAGTCTGGATNGACGGATTGCTCCAGAAAA  
TCAAGATGAGTCTTCCCGCCCCCTTCTTTCTACTTCTGCGCTCTTATCTAATGGAGAGTAAGTTCGAAGTCA  
AAGTCAGGACAGCAATCTCTCCTGTTCTGTCGTNATATGAAGGCGGGTGTCCCTCAAGGCAGCGTACTGGGTCC  
CTTCCTCTACAATTTGTACACGGCAGACATCCCCACTCCGGATGACCTACA  
>160\_rnd-5\_family-484\_\_RC\_\_Helitron  
TTTTTATACCCTTGCAGAGGGTATTATAATTTTGTGCTGAAATGTGTAACGCATAGAAGGAGACATCTCCG  
ACCCCATAAAGTATATATATTCTTAATCAGCATCAACAGCCGAGTCGATATAGCCATGTCCGTCTGTCCGT  
CTGTCTGTTTCTATGCGAACTAGTCCCTCAGTTTTAAAGCTATCTTAATGAAACTTTGCAGAACTCCCTCTT  
TCTGTTGCACGCAGCACATATGTGAAAACAGCTGGATCGGACCACTATATCATATAGCTGCCATAGGAA  
CGATCGGTCGAAAATTAAGTTTTTGCATATGAGGAACATTGATCGTTTGTGCAAGATTAAAGTTTCTATGCG  
AACTAGTCCCTCGGTTTTAAAGCTATCTTAATGAAACTTTGCAGAACTCCCTCTTTCTGTTGCACGCAGCA  
CATATGTGAAAACAGCTGGATCGGACCACTATATCATATAGCTGCCATAGGAACGATCGGTCGAAAATT  
AAGTTTTTGTATGAAAAAACATTTTTGTTTTTCAAGATATCTTGACCAAACCTCGGCATTTATTAGTTTTACTN  
TACTCCTCATATATATGCAAAATCCTATTAAGATCGGACCACTATATCATATAGCTGCCATAGGAACGATC  
GGTCGAAAATTAAGTTTTTGTATGAAAAAACATTTTTGTTTTNTCAAGATATCTTGACCAAACCTCGGCATTT  
ATTAGTTTTACTNTACTCCTCATATATATGCAAAATCCTATTAAGATCGGACCACTATATCATATAGCTGC  
CATAGGAACGATCGGTCGAAAATTAAGTTTTTGTATGAAAAAACATTTTTGTTTTTCAAGATATCTTAAACT  
CGGCATTAATTANTTTTACTTTGCTCCTTTGTTGTTTCTTTA  
>160\_rnd-4\_family-450\_\_RC\_\_Helitron  
TTCGTATATTTATTTTTTAAATAATTTTATGTTTTTTTTTTTAAAGACTTTTATGATTTTGACATTTTTTATACA  
GGATCTGCTCTCTTAATTTTTTTAGTGCTTTTGTTGTTTTTCTTCATTTGTTTGCTAAATATAATTTACGACA  
TGTTTTACAAGGCGTCTCTAGATGAAATATTATATTTTTTTTTTATACACCGAACCCATTGAAAATGGGCAAA  
AAGGGTATTGTGTATTCGTGCAAATGTATGTAACAGGCAGAAGAAGGCATCTCCGACCTTAAAAAGTATA  
TATATTNTTGATCAGACATCAANAGCCGANTCAATCTAGCCATGTCCGTCTGTCCGTCTATCCGTCTGCTC  
GTCCGTCCGTCTGTCCGTATGTATAAACGCAAGGTTATCATAACCAATAAGAGCTAGAGAAATTTTAGCA  
GTAGGTCCCTCCTAGTGCTTTTAAAAGCTGGAGATGTGCGANCTTGNTTCCGATAACCGATAAGTTACTCAAT  
TTCCAAGCAATCGATAANAATCGATATCGANNTNCTGTTTTTTTAGAGCAAATTTCTTGGGTAAATATTAAG  
AGCNGGAGCCGGGTTTCAAGCTTTTGGATTAGATGTTGCTANCTTTCANTTTACANCTATCGCAAATNCCA  
AGACAGAACTGTATAATGCGAGCAGTTATTTTTATACCCTTGCAGAGGGTATTATAATTTTGTATGAAA  
TGTGTAACGCATAGAAGGAGACATCTCCGACCCCATAAAGTGTATATATTCTTGACGATAGCAACANCCG  
AGTCGATATAGCCATGTCCGTCTGTCCGTCTGTGTTTCTGTGCGAACAGTCTCTCAGTTTTTAAAGCCTGAA  
ACTTTGCANAGGTCATAAAGAGTCCATAACTGT  
>Ref\_dvir\_1029  
CAGAAGGCGTGAGCACCAGTAGGGTAGGGGCACAACCACTTAAACCACAAAATCCACACAAACATTTTT  
GCAAACAAATAGTTTATCCCATTTTTCTCGTTTCGCCCTCCCATTGCCCACTGAATTATTTAGAGCAAAGAA  
ACACACGAAATATTAACAGGAATTTATTA AAAACATCAGTCGAAGCAGCACATGTGAGCTTCAATCAAAAG  
AGGAACTCCTGCTGTTCCCTTTTCCCTTTTCGCCTTTCTGTTGGACGATTCTCGAAGCTGTTAATCTTTTTTCA  
ACTTTGTAATTACTTTTGCAGGCAGAAAACCTTTCTTTGAGCTGCACATTCACAAATTATTTTCGAAACAAA  
CAAACAACAAAGCCACTCAACCACAGCACCACACACACCTCTTACACACACTCCCCTCAAACACACTCTC  
GCACCACACATCACAGAGTGTACAGACTCTGCATCTTCAGTCCGAAAGTCAACTAAATCACTTTCTATTC  
AACAGGACTGCGAGCAGACGGCACAAAAAGGCCACCAGCACAAAGGAGGACAACCTGGACACGTGCTCGA  
CACCAACAACCTGGCACAAGCCACTGACCAGCGGGCGAGACGTTGCCAACGTGACGAGCTGAACCACCAG  
CAGCAGGAGTGGAAGCAGCTAGGCAAGGGGGGAAGAAGTGGCCAATAAAAAAGCTAACGAAATGCTGA

TGCCGCTTGCAGTCGACAGGCGAACTCGGCAACAACAACAAAAACAACCGAAGCAACCGCATTA AAAAC  
AAA ACTGGAAAAGTTGAACCCAGTCCGTAGAAAGGGACAGCCAGAGTAAAAGTTCCAAATTTGCCAGAC  
AGAGTCCACGTAGAGCTGCTCGTCGCTTTGTGGCCGCCATC

>160\_rnd-5\_family-471\_\_RC\_\_Helitron  
AAGCAGCGTAATGCACGCCTGCGTGCNTGNAACAGGCANAAAGGNAGCATCTCCNACCCCN TAAGGNGCA  
TANATTCTTGATCCGCACCAATANCCGAGTCAATCTANCCATNTCCGTCTGTGGACAGCTAGAGACTTTAA  
ATCTAGTGNCCGCGCANNNCGAGTTCGTTTNCGGTAATCGATAACTTNCNCCGTTTCCAAGCAATCGATA  
AGANTCGATATCGACGTCTTNTCTNTTGAGCATAAAACAATCTATATGTGTCAAGTANCTTTTCATTTTATT  
TTTTACCTAATTGCCGCCTCCCCGCTACCACCAAAGAGCTATAAATCAAGTNAATAANCCAACTTTTATTG  
CCAACCAATTTAAGNNACAATTTAAATGCAATTNNCTCTTTTTTTTTTAGANTNCACGAATATTNTACAGCT  
AAAAATTTAATTGTTCTAATATTGACACGTGATTGCGTCAGCTAGCGCAAATTGCAAGAATTTCTGTGTAC  
ATGTACACACACACNTTCANGCGCGTNTNGNTCGNATTCAATAACGGGAAATAATAATTGCGATCGTATT  
GCATGCCGTGCTGTGTGTATGTGCTGCTATTTTGGTTTAGTTTTNTTCGTTGAAACTGAATTTTGACATGG  
CTGTGAGGTGGTAAGCAATTGNTGCGATTTGTNACGGGTTCGAGTCTACTAAGGAATTTTCTTAATTTA  
TTTTTATTACTGCTNAAGCAAACGAGCGCGTAGCGCGAGCTGCATTTGGTGTTGGTAGANGANGTTTCAG  
GGTATCCTCCTAGTCGGGAACTCCCGACTAAAGCCTTTTTTTNNTTTAGTTGTTCCATCTACATATGTACTG  
GCTGGCATTGTTGCTTATTCGGCTTGCATT

>9\_rnd-6\_family-523\_\_LINE\_\_I-Jockey  
TAAGCCCCTTCCCAGGGCTACAGCACGGGATGTCGCCCCTTGTAGGCTATCAAATGGCCATTCTTCCT  
GATCACCAATTTGGGTTTCAGGGATGGGCATGGCGCTGTTGAACAGGTTACAGAGTGATTAACCATATTC  
TTAAGGCTTACGACGACAGGCCTTCGACCGAGTCTGGATAGATGGATTGCTCCAGAAAATCAAGATGAGT  
CTTCCCGCCCCCTTCTTTCTACTTTTGCGCTCTTATCTAATGGAGCGTAAGTTCGAAGTCAAAGTCAGGACA  
GCAATCTCTCCGGTTCGTNATATGAAGGCGGGTGTCCCTCAAGGCAGCGTACTGGGTCCCTTCCTCTACAA  
TTTGTACACGGCAGACATCCCCACTCCGGATGACCTACATGAGTTCGCCACCCCAGGCGAGTACGAAGCC  
ACCGATGGGGCCCAGGAATACATCCACTTGCTTGAGAGCTGGGCTCGCAGGTGGAACATCAAGCTCAATG  
CCTCGAAGTGCCAGGCGGTCAACTACCCGAGCGTGGCAAGGCTCCAGCAGTCTGGATAGATGGCAGCCCC  
CTTCACCCTGGCATAAGCGCCAAGTATCTTGGAATTGTACTGGATGAGAGGCTTACCTTTCGGGCGCACAT  
CGACGGCCTTCTCAAGCAGTGCCGCTTTAAGATGGCCGAGGCCAACTGGCTACTAAGCCCCAACAGCCCA  
TTGGCCACTTCGCTGCAAACGGGCAGTTTACAACGTCGTGGTGGCGCCA ACTTGGAGATACGGTATCCAG  
GTTTGGGGAATTGCNTCTCGTACAAATCGAAGACGGATTCAGACACTCCAAA ACTTTGCCTTGCGCCGAA  
TGACCGGTGCTGACTGNTACGTCAGAAA

>Ref\_dvir\_500  
GTTTGGAAATCAACTGACGGATATCTCTCTGTGCGGAATGGTAGTCAGTCCAGGCATAGTTCCATGCTGAGC  
TATTGTTGATGAAGTGGTGGTTTCCCCGGATGCAGTCACTAAGGTGGTAGCCTCTGAAGGTATTCTACCTG  
TTTGAGTAGTATTTGAAGTTTCAAGGCTAGTCGGTTCTGTTTGAGTTACTAGTACTGTGGATTCTTCTGTGA  
CTGTTGGTACAGAAAGTACTAGCGAAAGTTGTTTGGGTAGTTTGAGAAACA ACTGACGGATATCTCTCAGT  
CGGAATGGTAGTCAGTCCAGGCATAGTTCCATGCTGAGCTATTGTTGATGAAGTGGTGGTTTCCCCGGATG  
CAGTCACTAAGGTGGTAGCCTCTGAAGGTATTCTATCTGTTTGAGTAGTTTTTGAAGTTTCAAGACTAGTC  
GGTTCTGTTTGAGTTACTAGTACTGTGGATTCTTCTGTGACTGTTGGTACAGAAAGTACTAGCGAAAGTTGT  
TTGGGTAGTTTGAGAAACA ACTGACGGATATCTCTCTGTGCGGAATGGTAGTCAGTCCAGGCATAGTTCCAT  
GCTGAGCTATTGTTGATGAAGTGGTGGTTTCCCCGGATGCAGTCACTAAGGTGGTAGCCTCTGAAGGTACT  
CTACCTGTTTGAGTAGTTTTTGAAGTTTCAAGACTAGTCGGTTCTGTTTGAGTTACTAAGACTGTGGATTCT  
TCTGTGACAGTTGGTACAGAAAGTACTAGTGAAAGTTGTTTGGGTAGTTGTGCGGTATGTCATTTGAAGAGGA  
CGTTTGAGAATCAACTGACGGATATCTCTCTGTGCGATAGTAGTCAGTCCAGGCATAGGTTCCATGCTGAGC  
TATTGTTGATGAAGT

>9\_rnd-4\_family-44\_\_RC\_\_Helitron  
CGAAATTATACGAAACTTTTTGTTNCTTA ACTTTCTTTTTGTTNAGTAATCTTAGAAGTATAGTAATGCTTT  
ATTTTCGAAAAATGTATATGAAAGCAACATTATATAATAACATAGGCATTTAAATGCTCATAGGTTTTTTA  
AAATATTTGAAAAAATAAGAAAAAAATTACACTTTTCGAGTGTAACGATATTATACTAAA ACTTGTTTTTA  
TACCCTGAACCCATTAAAAAATGGGTAAAAGGGTATATTGCATTTGTGCAAATGCAAATGTATGTAACAG  
GCAGAAGGAAGCATCTCCGACCCCATAAAGTATATATATTCTTGATCAGCATCAATAGCCGAGTCGATCT  
AGCCATGTCCGTCTGTCTGTCCGTCCGTCCGTCCGTATGTATGAACGCAAGGATCTCAGAACCTATAAGAG  
CTAGAGACCGAAATTTTAGATGTAGGTGCTCCTAGCGCCTGCGCAGATCGAGTTTGTTCGATAATCGAT  
AACTTACTCCGTTTCCAAGCAATCGATAAAAATCGATATCGATATCCTGTTTTTTGGGCAATTCGGTAAA

TAATAAGAGCTAGAGTCACCAAACCTTGACATATAGCTTCTAAAAATAGAAAATACATATATGCATTTGATG  
TTGGAAGAAGAGGGTTTCAGGGTATCCCCTAGTCGGGAGCTCCCGACTAGAACCTCTTACTTGTCTTTTGTG  
CCACATTGCATATTTGCATCGAGTTTGTAAATTTGCGAAAACGATGTGGTCNACTTTTCCCATTCTCTNAA  
AANTCNTACCTTCTTNGTTTCAGTAACANTATCNAATNTCTNTTTTTTCNGCGTAAACACGACGTACAAGAAT  
TCCCCAGCTAGGC

>9\_rnd-1\_family-301\_\_LTR\_\_Pao

ATATCCAAATATTGAACTGGCCGACCCCCGATTCCNCAAACCTGCCAGAGTAGACTTGCTTTTAGGTGCTG  
GAAAGCTTTTCGACCTCCTTTGTGTTGGCCAAATAAACCTGTCTCCTGAACATCCGATTCAGAAAACATTT  
TTAGGATGGGCCGTGTCGCAAGGCACATCATCGCAAGCACAAATTAGCACTNTCGCAATTGATTTTGGGA  
CTAAGAACAGACTCCANAGGAGTCGAAAGCTGCATATACAAGTTATTTGATTTCTCAATTGCAGATGTTG  
ATGTTGTATATTCAGTTCCTCGTCACAGGTGCTGAGATTGGTAAGGTTATATTCCTTGTAGATTATGTTTCG  
AAAGCAACTAGCTTTCCAAATCACTGGCCTTGTGGCTCAGCAATGAAACAATTAGTATAACGGATTGATG  
ACGGNAAGTGCCGGAGCAGTATATTTAAAGAAGTTGTTCTTACAAAGTTGGATACAAAACCTAAACTAGAA  
TTGAAACATAGAATTGGATCTGAGCATACGCCAACACTGCCGTTTGGCAGATAGGCAAGTGTCAGGTTAC  
CGCTGCTGACCGCAGTGGCGGGCACTGAACTCATGCGTCAGCAGAATGTCGCAATGTAAGCAAAGTGCAC  
TGCAACATTCTTGCGTTCTTATAAACAAGTGTGTTCTTATGACATAAANATGAAGTGAAATTCTTACGT  
GTTAACCTGTCCCCCTCAAGCNTTTGACCGNCCGCGGTTATTTTATAGCTGTAAATGGCCTNTGTACTTCC  
TTCGAATTGCATTCTCTTTACAAATTGTCAAACGATGAGAAAGCCAATGCCAACGAACTGAGGATGATG  
CTTGCTGCAATTC

>Ref\_dvir\_869

GGCTTTGCCGAGGGGGCATGGGGCATTTCAACTTCATTTGAGCCTTCAAGGTCCTGTAATCGACGAAATTA  
ATTCATCCCCGTGTGCCACTGGTCGACAAATCTCGCTCGCGCAGTGCTCGTACAAAAGATGCCAACTCTT  
CTGTGAATTGCTTCGCAACAGCAATCGCAATGTTAGCTCAAGTTGTGAAATTTCGATGGTGAAATTGTGAA  
ATTCACCAACACATGCGTACATACAGGGCTTCTATCTGTACTTATACACACCGACGCTGCAGGAAACGTAT  
TCCAACTTATGAAAAGTCTGACGCTAGATCGAGGGAAGTATCCCAGCTGCAGTAATCTTTGTCACTTAGAC  
CTTGGAACATATCCCCTGCAAACTTCTCACCAGACTTTTATGCGTTTCTTCTCTGCATGTGTTTGTATAT  
GCGTGTAGGCGAACACGGCATATCTATGTACATACATAGATCTATCTACCCACTTCTGAACTGTAAGAATC  
GGTCAGGTCGACTGAGTGAGATACGCTTATACAAACATAAGTAAAGATAGAATAGTTTAATGCGTTAACT  
TCACAAAGATTTGCTTATCTCTTAGATTCTTAATAAGCGTCCGTCCTCCTTCTTATTGGCTTGCTGCTTTT  
CTCTAGTGATGCTTAACTCGATACTTCTTGCCCTAATTATCGATTTCGCTGTGAATGGCAATGGGTTGAGATT  
GCCAGACGCTTACATTCGGCTTTCCTAATATTTCGAAGCGTCCTCGCGAGATGAGTTTACTTGGTCATCAAC  
GGAGTCTTCATCCTCGTCGGACTCCTCTGTTGGTAACTGTCATTGTTTGATTTTATCTGAAGAATACACCGA  
TTTA

>Ref\_dvir.23.26.centroid

TAAACCTTGAGAGAAATCGCGCTGTTGGAAGTTCCTTCGAAAACTTCTTGTCTTACAGTAAACAATACTG  
GAGTACACCTTAGATTGTAGGAGTTTTCATTTTCGTAGGTGCTTCTTTTGAGTAGCTTTGGCAGCCTGATTT  
TCATTAAATCAAAGGAATCATCTCTGCTAAATTGCACTGTTTCGATCTTCTAATAAATTCAAGTCTCGTATT  
AATTTATATGTTGACCCATTGGTAATCATATTCTGACCAAAAGCCAAGCGATACGGACTATGGGTAATAG  
CTGAATGCCAACTGGATCACAGTGAACAACAGATACTGCTGAGTTTTTCATCCCTATTAGACTGATTAGGA  
TTTATATAAGCTTTCATGGCTGCTATAACAGATCTATTGACACGCTCGGATGCGTTTGCTTGAGGTGCGTG  
AACTGCAGTGTACGAGTGGTGTATCGAATACTTTTGAAGTAAATCGTTAAACATTTGTGATTTAAATTGAA  
CACCATTGTCCGACACAATCACTTCTGGGACCCTGAAGCAGTGAACAACCTCTTTTTCCAAAAACGGTAG  
AATAGCATCTGCGGTCAATTTGCGAACCAGTTTCAAAAAAGGAACTTTGTGAAATGGTCGAGCACAATA  
AATATGCCAATATGACCGGCCTTGGAACGGGGATACGGTCCAAGATAATCAACATACAATTTTTGAAAGA  
ATCGATAAGTTTCTCCACTTTTTCCCATAGGAGGTCTCAAAACACGATTCGGATGTTTAGTCGATTTGCAA  
ATTCACATTTATTGATATACTCTTTCACGTCTGAACTAAATTTGGCCAATAATAATATCGTCGTAATCTC  
TCTAGTG

>Ref\_dvir\_632

TGAGCGAGAGAGCGTGAGCGAGAGAGCGTGAGCGAGAGAGCTGAGCGAGAGAGCGTGAGCGAGAGAGC  
GTGAGCGAGAGAGCGTGAGCGAGAGAGCGTGAGCGAGAGACTACAGAGAGCTACAAGAGCTGACGGAG  
AGAGCTGAGCGAGAGAGCGTGAGCGAGAGAGCATGAGCGAGAGAGCTGAGCTAGAGAGCGTGAGCTAG  
AGAGCTGAGCGAGAGAGCGTGAGCGAGAGAGCGTGAGCGAGAGAGCGTGAGCGAGAGAGCGTGAGCGA  
GAGAGCGTGAGCGAGAGAGCGTGAGCGAGAGAGCGTGAGCGAGAGAGCGTGAGCGAGAGAGCGTGAGC  
GAGAGAGCGTGAGCGAGAGAGCGTGAGCGAGAGAGCGTGAGCGAGAGAGCGTGAGCGAGAGAGCGTGGA





CGGGAAGACTCATCTTGATTTTCTGGAGCAATCCATCAATCCAGACTCGGTCTGAAGGCCTGCTTAACGTCT  
ACAAAGACTCCATAGCAATAGTCTTTGTCGTCGTAAGCCTTAAGAATATGGTTAATCACTCTGTGAACCTG  
TTCAACAGCGCCGCCACCCCTGAACCCAAATGGGTGATCAGGAAGAATGGCCATGTGATCCATAAGCCT  
AGCAAGTCGGGCGACAATCAGTCTT

>Ref\_dvir\_466

AAAAACAAAAGAGGTCTTCGGAAAAAACATATCTCCGCCGTTTTAAAAAAGGAAAATAAGATATGTTTTG  
AAACGACATATCTCCGCCGTTTTAATATCGAAAATATATGTCGTTCTGAAACGACATATCTCCGCCGTTTT  
AATAACGAAAATAAGATATGTCGTTCTGAAACGACATATCTCCGCCGTTTTAATAACGAAAATAAGATAT  
GTCGTTCTGAAACGACATATCTCCGCCGTTTTAATAACGAAAATAAGATATGTCGTTCTGAAACGACATAT  
CTCCGCCGTTTTAATAACGAAAATAAGATATGTCGTTCTGAAACGACATATCTCCGCCGTTTTAATATCGA  
AAATAAGATATGTCGTTCTGAAACGACATATCTCCGCCGTTTTAATAACGAAAATAAGATATGTCGTTCTG  
AAACGACATATCTCCGCCGTTTTAATAACGAAAATAAGATATGTCGTTCTGAAACGACATATCTCCGCCG  
TTTTAATATCGAAAATAAGATACGTTCTGAAACGACATATCTCCGCCGTTTTAATAACGAAAATAAGATAT  
GTCGTTCTGAAACGACATATCTCCGCCGTTTTAATAACGAAAATAAGATATGTCGTTCTGAAACGACATAT  
CTCCGCCGTTTTAATATCGAAAATAAGATATGTCGTTCTGAAACGACATATCTCCGCCGTTTTAATATCGA  
AAATAATATGTCGTTCTGAAACGCCTTTTTAAATACAAAAAATAAGATATGTTGAAAACAAATTTTCC  
CCCCCTTTTAAAAAATAAGATATGTTGAAAACAAATTTTCC

>160\_rnd-1\_family-327\_\_Unknown

GCTTATTAGTAAGAAATGCCAGTGTGGTTCGCGAATCCAGTCCAAGTGGTAGGTGACACGCTGGAAGCCAG  
ATGGGTGTCCAGATTGGCAACCGGCAGAAGAAACCCAGTTGGTAACGCCGACCAGTCTGTGCGCCGTCGTG  
TGTAACCAATGGACCACCGGAGTCACCGCCGCAGGTGGACTTGCCGTCGGGNGTGCTNACGCAGAGGATG  
TTGTCACCAACGGCGCAGAGCCGTAGGTCTGCTGGCACTCGNNGTTGCGNATGATCTGCAGGTTCGACGCA  
CTGCAGCCAGTCGGGCAGTGGGCGGCCATCGTAGGTACCGCCCCAGCCGCAGGCAACGGCCCAGCGGTGCG  
TCGTAGTCGTTGTAGCGGTGCTTGTAGCTGGGCAGCTCCACCTTGTGACCATGCGCCAGAAGTCCACATG  
AGGAGTGCGGATCAGAGCGATGTCAGCGTTGTGGTGGTTGATGATGTCGTCGCCGCCGACCCGGTGGGTG  
AACTGGGCGTTGGTGCGCCAGGTGGCACCGNAGTAGACGGTNACGTCAGAGCCCGTGCAGTGCTCGGCA  
GTCAGGACCCAGGTGTTTCCAATGATGGAACCACCGCACCAACAGCCACCGCTGAAGCCCAGGCCAACGG  
TGTAGGGCGCCTTGCCCTCGTAGGGCTGGGTAGCCATTGGTGATACGNCCCTCGATCTTGTTGACCTTGGGC  
ATGTCTCGGGGTGGACGGCAGGCGCCGCGGCCGAGNNGCGGCGGCAACAGCCAAAGCCAGAATTGTN  
ACGAACACCTTCATGTTGCAGGTACNACTTGG

>160\_rnd-5\_family-1376\_\_LINE\_\_I-Jockey

CGCAGCGAGAGGATGGCAGTAATGCAACAGCAGGCTTTGGGTATGCAACAGCAAATCCTTAACCTTTTGA  
CCGCGTTGCTATCCAAATGAACACACCACTGAAGGTGTTAATCTGGAATGCCAATGGCATTTCAGGCTCTA  
GTACAAAAACACGCTATCGGAATAATTCTGCTGTCAGAACTAGAACCAACGGTCCTACNTTCCCCAGAA  
TCTTTGGCTTCGAGGCGTACCCTGTACACTGGACTCAAAATCGCTCAGCTAGTGGCGGCTGCGCTGTCCTC  
GTCCGGAGTAACTTGGTTCACTTCCCGCAATTGAGCATTGCAAATCGTGTTTACCAATATTGACTGTGAA  
AGTCTCCACTGATGCTGGTAGCGTGGACTTTGGAGCAGTCTATNGCAGCAATGCGCGCGGCCTTCAACTA  
GCTAACAGCCTAGCGCATCGTCAAGCGAAGGTACTGGCCACAGGTTCTCCCACAAGATACCCGTACGGCA  
GCAGAGGCACTCCGTCTCGCATAGACTTCGCTATCTACCAGGGAATCCCTGACCAGCTCCTTTCAATCGCT  
GACGATTGGGACCTCCCGAGCGACCACTGGCACTGATAGTTACCCTGGAGAGCAGGGCCAGAGTGGTCA  
GCGCAATACCGAGGCTGATCAACTCACGCACTGATCTCGGTGTCTTCCAGAGACAGATGAGTGANAGTAT  
ACACCTCAATACTGAAATCGGCACTGGACTGGATGTAGAGGACGCCATTGAGCTGCTTAACGCAAAGATT  
CGCGCAGCAGCAGCCGAAGCCA

>Ref\_dvir\_481

AGATAACGCACAAGCAAGCATAAGTAAATATGAATTGCGAAAACAGACACCCAAACATGTGTATGCATA  
CAGAGAGAATCGTCGAATATGTACATACATACATGTATGTGTCTATGATTGCTTGTGCATTGCCTTCTT  
ATTTATCGCGCTGACACTAATATTTGGCAAAGTGTCGAGAAAATTACAATAAAACAAACACTTTAACATT  
CTTGGAATCGATGGACTTCTTCAAATTTTGATTAACTTTTGTACGATTTCTTTTATGGCTATTAATGCTTA  
TTAGTTATACCATTAGAGATAAGGATGGCACTTACTTGAGAATTTGCACTTATAATTGCACTTTACTTATG  
CATCACATCCAAAAACACACTAACATAGAAAGTTGAGCTGATCCATAAAAAACGGCGCTCAGAAAAAAGA  
GCACTCAATCGACCAGGCGAGAACATCACTGCCAGCAGATATTGAGTGGACCAATCAGCGATCAGCACCA  
AATTGAATCGTGAGCGCGTGAGCGTAAGCAGAAAAATGACAGCGAACACACACGAACAGGTGACTGC  
TTATCTCTGGCCTTGGCTCATCTCTGCGCATACACGTGTTTGTGTGGGTGTGTGCATGCTAAGCAATGTGG  
CGCATCGTTCTCACTCGTATTTTCGATCGCTTGCTTATTTTCTGGGCGCCGGTTTTTTCGTCCGCTTGACTCAC



TCACAATTTAACACTCTGTTAGTTCGACCGCAGTATTAAACATAAATTACTCCCAAATTGCAGACGCATAA  
TTTCTACTATGAATTGGC  
>Ref\_dvir\_1068  
CGGATCCTTCAGAAAGTTCAACCGAGAGCTCTAGTTCCAGTTCCCAGGAACCATCAGAAAGTTCCACTGA  
GAGCTCTTTAAGCTCAAGTTCGGAGGGGCTCATCTTCTGAAAAAACGGAACCATCAGAAAGTTCAACTGA  
GAGCTCCAGTTCCAGTTCCGAAGCCTTATCTTCTTCAGAAGTAACGGATCCATCAGAAAGTTCAACCGAA  
AGCTCTAGTTCCAGTTCCCAGGAACCATCAGAAAGTTCCACTGAGAGCTCTAGCTCAAGTTCGGAGGGCT  
CATCTTCTGAAAAAACGGAACCATCAGAAAGTTCAACTGAGAGCTCCAGTTCCAGTTCCGAAGCCCCATC  
TTCTTCAGAAGTAACGGATCCATCAGAAAGTTCAACTGAGAGCTCCAGTTCCAGTTCCCAGGAACCATCA  
GAAATTTCCACTGAGAGCAATAGTTCAAGTTCGGACGGCTCATCTTCTGAAATAACGGAACCATCAGAAA  
GTTCTACTGAGAGCTCCAGTTCCAGTTCCGAAGACTCATCTTCAGCAGTACCGGAACCATCAGAAAGTTCT  
ACTGAGAGCTTCAGTTCCAGTTCCGAAGCCCCATCTTCTTCGGAAGTAACGGAACCATCAGACAGTTCAA  
CTGAGAGCTCCAGCTCCAGTTCCGAAGCCCCATCTTCTTCTGCAGTAACGGATCAAACAGAGAGTTCAAC  
TGAGAGCTCTTAACGGGATCATCAGAAAGTGCAACGGAGGGCTCTAGTTCCAGTTTCGCAGGAACCATGAG  
AAAGTTCCTCTGAGAGCTCTA  
>Ref\_dvir\_827  
GTAGAAGAGAGTTCCAGCCAGACTAACACTGGTTGTTGAAACCGGAAACAATGTTGAATCTGGATCCTCC  
TCGAACACGATCACATCTTCGGATGAATCGAGTCAGTCTAGTTCAAGTTCAACCTCAGGAGGGCGACACTG  
TTGTTGGAGGTGGAGACTCACAGCAATCTGGCTCAACCACGACAACGACAACCTCTGAGGAAACCATTTC  
ATCGGTGGATCCCGTGGTAGAAGAGAGTTCCGGCCAGACTAACACTGTTGTTGAAACCGGAAACAATGTT  
GAATCTGGATCCTCCTCGAACACGATCACATCTTCGGATGAATCGAGTCAGTCTAGCTCAAACATCAGGA  
GAAGACTCTATTGTTGGAGGTGGAGACTCACAGCAATCAGGCTCAACCACGACAACGACAACCTCTGAGG  
AAACCATTTTCATCGGTGGATCCCGTGGTAGAAGAGAGTTCCGGCCAGACTAACACTGTTGTTGAAACCGG  
AAACAATGTTGAATCTGGATCCTCCTCGAACACGATCACCTCTTCGGATGAATCAAGTCAGTCTAGCTCAA  
GTTCAACATCAGGAGGGCGACACTGTTGTTGGAGGTGGAGACTCACAGGCAATCAGGCTCAACCACGACAA  
CGACAACCTCTGAGGAAACCATTTCATCGGTGGATCCCGTGGTAAAAGAGAGTTCCGGCCAGACTAACAC  
TGGTGTGAAACCGGAAACAATGGTGAAATCTGGATCCTCCTCAAACACCATCAACTCTTCCGAAGAATC  
AAGTCCGTCCAACCTTAACATC  
>160\_rnd-1\_family-313\_\_Unknown  
TTTAGATNGAGCCGGCGTTGTTGACCACCCAGTNGCGGAGNACAGCCACATCGGCGTAGACACCNGGGTA  
GTTGCCGTAGGCGCAGCCATAGCCCCAGGAGACGACACCAACGAGCACACCACCGGACACCAGTGGGCC  
ACCAGAGTCACCCTGGCAGGCATCCTTGCCGCTGGCGGCGGCGCAGATCATGGTGCTCTTGATCTCGCTAC  
CATAGCCGTAGGCGGAGGAGGCGCACACGGACTGGCTGACAATGTTACGTTACGTACTGCAGCGNTGT  
CGGAATGGAGCTGGAGCCGTACGACTGGGTACCCAGCCAGAGACGGAGGGCGGAAGCGCCGTTAGCGGG  
AGCAGAGCTGGCCAGACCGATAGCCTTGATGGTCGAGCTGAAGGNCAGGGAAGAGCTCAGNCGGATGAC  
GGCAATATCGTTGACCATGGTGTTGGCGTTGTATCCTTCGTGGTTCTGAAGGCGGCGACCTGGACCAGGA  
CGCCGCCGGAGTTCCAGTAGGTGGAGCCGGCGCGCACCTTCAAGCTGGAGGGCGGACACGGATTGCAGGC  
AGTGAGCAGCGGTCACAATGATGTTGGCGGAGTAGACGGAACCACCGCAGGAGTGGCCGCCATTACGCT  
GCAGCGAGATCTGCCAGGGGAAGCTGCCGATGGTGGTGGCGGTGCCGCCAACGATGCGTCCATCCAGCTG  
GGGCAGGAGACCCTCAGGGATCGCGGCACCGAAGGCGCAGGCAACAACCGACAACAAGATCACGAACCT  
GAACATATTGACTCGACAATGTG  
>Ref\_dvir\_881  
TTAATTTTAAAATACGTTTTTTGTTGTGCCACAAATGGTGTCTTTTTCCCGTAATGCCCTACTTGGAGTTCT  
ATTAATTTAAAATATTGCTGTAAAACAGCTTTACTCCAAAACCTTTTACCCATTTATAGGTTATCAAAT  
AGCTTACACAATAATGTCTATATTGTTTCGACAAAGACTACATCATAGTTTTACCATCAATTCAAGTAGGT  
GGTATTGGACCATAAACATCCGAATGAACCATAAATAAAGGTCTCTTGACATTGTCTTTATTTTTAGTTCC  
ACTAAACGGGAGTCTAGTTTGTGTTGCCATTAACACAAGCCTCACACAAATTGTCATGCAGTTGTACATTTT  
TTAAAATTTCTATATCCTCAAACATTATTTTCGCACAACCTTCTATAAACTATCCTCTACTCATGTGTAGATGA  
GGCATTTGTTGCCTGCCTCTACTATTGAGTAGTAGTAGTATTGAGTAGTGAAAGTACCTTCTAAAACGCCT  
TGTCCGTTCTTTAACACTTACACCAGTTGAATTGAACTGAATTGTCATACCAGCATTCTGCATCTTTGGCAC  
CGATAGTAAATTTTGTGGAATGTCCTTGCAAAAAATCACATTTTTTAGGGTAATATTTTTATTAAGATTGCT  
CTCTAATTTCACTGTACCCTTAACAGTATCATAAAATGTACTCTATAATTTTTGCAATAGCAATCTCAATTG  
GTGTTTCGCAGTAAACCATATTCCACAAACAGACTTACATTATTTATCATACGGTATGAGGCTCCTAAATG  
A

>160\_rnd-5\_family-165\_\_LINE\_\_CR1  
CACATCGCATTNAGCAAATGTGCATTCTGTCTTCCTATTCCATTAACGGGCAAAAACCTTATTCGTAAGTCA  
GAAGCTTTGGATTTAGGAGTCATTTTCGACTCTAAGTTCTCATTCGTTTCGGCATATAAACTATATTATGCCT  
AAGGCGTATGCGATGTTTGGGTTTCGTTAGGCGCAACTCTACCCAGTTTAAAGACCCNTTTACAAGATTATC  
TTTATATTTCGGCCTTTGTGCGGTCAAGCAATTGTGCACGCAAATAGGATTGAAAGGCTGCAAAAACAGTTT  
TTAAAATTTAATCTCCATTGCCTTAACTTTGCTGACCCCTTACCGCCACACAGAGCTAGGTGTCGATTACT  
ACATTTGTCATCTCTGGAAGATAGAAGAGTAATATCAGCGTTGCTTTTTTCTAAACAATTTAATTGNAGGAA  
TTATTGACTGCCCTTCCCTTCTAGCACGCGTTAACTTTAATGTGCCGAGCAGATCTTTGCGATACCACTTGC  
CGTTTTCTGTGGGGACTCATAGTTATGCAAGTAACGAGCCTATCAACAGATCATTAAAGCTTTATAACAGT  
CTTCCAACCTGAAATGCACTTCGATTTTTCTGCCAATAGTGCTCATATTAAACATAAGCTTAAANAATTCTTT  
CTTTAAAACTAATTAGTTTTACATTTTCTTTAAGTTTCATATTTTCTGTTTAGTTAGTTAGTCATTTAATNTAA  
TATTTTTAAGTTAAGATAACCTGAAAGCTACCAGCATTGGTTAATAAATAAATAAATAAATAAATCATAA  
>Ref\_dvir.17.1.centroid  
ATAAGCATAACAGCGCAACCACTTAACATAAAGATTTCATATTCTCATGCGCAATTCATAACGTAAACTAA  
AGACCCAGTCTCTAGAACGCAATTGCTAACGTAAACATGACAAAGCGTCTAGCTTACGCAAGCCACCCCC  
GCGAGCTTTTAAACTTTAAAGAAAGAAGCTTTATCAACCATAGCTGACTTGCAGCATAAGTTCACAATTGT  
ACTTTAGTTCTAATCTTGGATTCAAATAAATCGGAAGCCTTCAGCCTCCCACTTAAAAATATATTTTTTTCC  
AATTAGTAGCCACTAATCGGTTAATTGGCGCCCAACGTGGGGCTCGCGATTATAAATACAAAAAAGGAT  
AATTAAAGAAACAAAATCCTTAGTGATTTCGCGAGTGAGCAAAAGTGCCGATTTACCAGTCCATGATTGT  
CTCAAAGAGCATCAAAAATTTTCTAAGAACGAAAATATCGAGTGCCCTCTAAAAGAAACATAAAAAATTT  
CCGACGAACGGAAATATCCTGTTTCTGAAAACCTGAAGAGCAGTGAAAATACCCCTGAGCTGGAAATATTA  
ATTGTTTCGAAGACTTAAAAGTGAAATCACATTTCCCGTTCAAGTTAAATGAAAACATTCCA AAAAATTA  
ATCGATCAAAGAAGCGAAACGAATATTTTCGCCAACAACATTTTTTCTCCAATCAAAAACTTTTAACCAA  
TAAAAAATATCACGTCAACCTGAGACCCCCATAAAAGAAGACCCTAAAACACAGAAGGAAGGAAGGAAG  
GAAGGAAGGAAG  
>Ref\_dvir\_681  
CCCAACGAATATTTCTATGACCTGGACGCACCCTCGTCACCCACAATCAAACGGCACGGTCGAGAGTTGG  
CATAGGTCTATGAAAGCCGCTGTAATATGCAACCCGCAGACCATAGACAAAATTACTTCCAACCTGTAATG  
CTTGGATTCCGAACGTGTTTCTAGGAGATCACCAAGCATCAACTGCCGAAATGTTGTACGGGTGCACACTT  
CGTCTCCACAACGAATATTTCTATGACCTGGTCGCATGGCAGCCCTAGGGGCCTACCTCTTAGCTGCCATT  
CACTAGAAGACGGAAAAAATATGCTAATCAGAGCGAACACTGACAAGAGAACAGAAGACGAACTATTTTC  
ACAATAATAACTGATATCACAATAAACTAACGTTAAGAATATACTTCCGAGGGGGCCAAAAATCGATCAT  
TTTTAATTAACCCTGACCTCAAAGGACTACTGATGTACTAGTCTACTAATGATCGTAATTTTTAATCTAGTT  
TTTCTTGAGTTAACATCTAATTTATTTGACGTTAACGTCAATGAATTGCAATCAGTTGCAATTTGGAATGA  
AATTCCTTGTAGGTGTATAAAGAATATTTTAAATGCGTATATAACAGTTTAGTTGAGTTAACTTCTGATAA  
GTAAAAGACGAGGTAAATAAACCATCCCTCTCGGCGATTCTAGTAAATTGATTTTCATACCCTTTTTTAAA  
CAGACAGAATGAAGCATATCCGACCCGAAATGTATGTACATGTATCACAAGCCGAACCAATCCAGCCATG  
TCAGTCC  
>9\_rnd-5\_family-2327\_\_Unknown  
TACCAACTACTCTACCGGGCCGCTAGCCTCGTACCACCTACTCTACCGGGCCGCTAGCCTCGCGCCAACCTACA  
CTANCGGGCCGCTAGCCACGCACCAACTGCACTACCGGGCCGCTAGCCTCGCACCANCCGCACTGCCGGGCC  
GTGGCCTCGCACCAACCACGCTANCACCCTAGGTTAGGGTGAACATCGGCTATTCCCGATGTTAGCACAA  
ATATGACCGCCCGAGAATACAAAGACCAGCAATTTCTTCATCGTTTTCTTATATTCACTTTATTTCACTTG  
TTCATTAATACTACTGCCCTACTGTGTTTCTGAACTAAGGCCCTGCCGCACTGTCTTGAGCCCTAGCGCTCC  
GCTGCACTCTTTGCACTTCGTCGCTCGCGCTCCTCTTCGCTGCACGTCTACTCACCCCTGATAGTCTCTCCAA  
AAGTGCCGGCACGCTCGCTAGCGAGCCGTGCGCTCGCCTCGGCCGCTCGACTTCGCCGCGAGCTTTTCGCA  
ACTTCGCCTCGGAGCTTTTCGCTCTTCGCCGCCGAATTGAAGTTGCGCTCTCGAAGGCGGTGTTGAGCAACA  
GATCAGCAACGCACGGTTGCTGCGACGGCCGGCGGTTAAATTCAAACCTTAATTCAAACCGGGCTCCTTGC  
CCTTAATACTAGCTTCAATACATCGGCACCTTGCCTTAACCTGTTCTTATTACTAATAACAATGCTTATATACTAT  
ACAATGCTTATACCCTATAACTATAATTATGAACTGTGGGGTGGCTACCTTAGTGGCCGCCTCACA  
>Ref\_dvir\_63  
TTCCCCGTCAAATCCAGAGCGGGGAGCTATGGTCGTTTTGAAGCGTCATATCTCCCCGTCAATTCTAGAGC  
GGCGGAGGCTATGTCGTTTCGAAGCGTCATATCTCCCCGTCAATTCTAGAGCGGCGGAGGCTATGTCGTTT  
CGAAGCGTCATATTCTCCCCGTCAATTCTAGAGCGGCGGAGGCTATGTCGTTTCGAAGCGTCATATCTCCC



ATGTATGTATGTATGTATGTATGCATGTATGTATGTATGTATGTATGTATGCATGCATGCATGT  
ATGTATGTATGTATGTATGTATGTATGTATGTATGTATGTATG  
>Ref\_dvir\_850  
CTAAAAAGCACCCACTCCTAGGGATTAGCTGCTGCCTATTACCCCTCAGGCTCCAAGTCAATTTCAGTAGC  
CTACAACACCGATTACACAGCAGCTGTAGACTCTGATTCTGTCCCGAAATGCGTAACATCGGCACGAGAA  
AAACGAGTCAATTATCCGTGTCCTCAACTGTCTTAGATGTCCCGAAAGCAAGACAGCAACAATTAAATGT  
ACAACAGTCGCTAGAAGGCTCGTCGTCCAGAATACCGGCTGTTTTGGGTACCACTGCTTAAAGTGTTGTCA  
CTGTCCTACCTGTGGCGCCTAAGCCTCAAGTGGGTGTTACCCGAAGAGACATAGTTTTGTTTCTTGGCTT  
GTCCCCCACTTTCTCATCACATGAAGGTGAAGCATTGTACAGGCAAAAATTCAACCACAGGTGAAACGG  
TGAGAAATTTAAGTTCGCCTATGGAACATATATATTGCATCCTTTATAATAAGTGTGCCGCCAGAAATAT  
TTACTAACATGTGTTTATAAGAGTCTTGGCCCGGAGTACTTAATAGTCAAAGAATAGAAGGCCAATAAGA  
TTAATTGGACTCCGTGTATATTGCCACCTGGTTCTAGTGGCGCATCAACTTGAGTTGCGTCACAAAATAA  
ATTCTTCCTTCGAGCTTGCCTACCAGAAAGATAGAGGTCTTAAGTCTAAGATCGCTAACATGAAGTTAGAT  
TCTCTTGCAATTAATTTCAAATTATTGCTATGAGTGAGCCCC  
>Ref\_dvir\_963  
GAATTCAGGACAAGCAACCCAGAAGGCCGACCCAAAACGATCCAAAAGTGGTTGGTTTGGAAAGCACCAA  
CTGCCTTGACGTCTTGACGTCAGACCACAGATTCTCGATGGGACTCAGGTCAGGCGACTTTGCCCTGAACC  
ATTGCTTTGCTTTCTTGCTGGTGTGTTTGGGGTCATTGTCCTGTTGAAAGACCCGTACGAGGGCATTTCGTA  
TTCTACAAAGGGTAGCATAACTGTCTCCATGATATTCACATACACGTGCTGATCCATGATGGTTTTCTCCA  
ATGTATTGGACCTACTCCATAGTAGGAAAAGCAGGCCCATACCATTACACTACACCCTCCATGCTTAATGG  
GTTTAGTGGTGTACTGGGGCTTGTATTCTGTGTTCCCTGGACGTCTAACGTATGATCGAGAACCCTTTCCAC  
CAAACATAACCACTTTGGACTCATCTGACCATAGAATATTCCTCCATTGTTGGGATGTCCAATTTGCATGA  
TCCCTGGCAAACCTATGTAAAGCGAATTTTAAAGCTCGGTAGCAGGCTTGAAGGGATCCTGCGTGTTCTGAC  
GAATCAGTCTTTTGACATGAAGATGGGTCATAGATCGTGTTCAATCACGTGTTTCAATCATTTTATTGAAA  
GCATCCTTCCACTTCTCTATAAGTTTTTCCGTTCAATATCAGTTTTTTGAAAATATCACGCTTCTCTTTAGTG  
CAGTGCTTTCCACGTTCCCTTTGTAATGATGATTCTTA  
>9\_rnd-5\_family-3273\_\_RC\_\_Helitron  
TTGCTGCTGGGTATCATTTAGTCTCAGCCTTTATCCTTAACAAAATATATACATAATATATATTAANATATA  
TAATATGGTAATGCGATCNTGAGTGTGTTGATGTAACATCTATATTCCGCGAGNCGCCTTTTTATTATAC  
CCTGAACCCATTGAAAATGCGTAAAAAGGGTATATTGGTTTTGTGCAAAATGCAAGTGTNTGTAACAGGC  
AGAAGGAAGCATCTCNAACCCCATNAAGTATACATATTCTTGAGCCGGATCGAGCATCAANAGCCGAGTC  
GATCNAGCCGTGTCCGTCTGTCTGTCTGTCCGTATGCATGAACGCAAGGATCTCGGAACCTATGNGAGCTN  
GANNCTTGAAATTTAGATGTANGTTCTTCTAGTGCCTAGTGTTCGATAATCGATAANTTGCTNAGTTTC  
CAAGCAATCGATAAAAATCGATATCGATATCCTGATTTTTGGGCAATTTTGGTAAATAATAAAAGCTAGA  
GTCACCAAACCTTGACATATACCTTTTAAAGTTNGAATTTATNTACGCATTTNATATTGGAAGAAGAAGGTTT  
AGGGTATNCCCTAGTCGAGCACTCCCGNCTAGTACCCANTTGTTTTTATTGTGTCCAGANTGTTTTATNATT  
TAATGGCATATTTGCCAACTTTTCTAGGAGTATTATTCCACATTTGCTAGGCAATTAATAATCTTAGATAC  
AATAATACTTTTATTTTATTTTCAATTTTCAGATACTA  
>160\_rnd-5\_family-3008\_\_Unknown  
GAATGTATNTCNCTGAAAATGCAAAAGANACGGAGAATATATTTAGTATGAANAGGAGAGATAGAGAGA  
GAGGTAGAAAGAGAGAGCGAGTAAAGAGAGAGAGAGGAAGAGAAGAGGGACAGAGAGNGAGGGAGAA  
CGGGGGNTAGAGAGGAAGAGAGAGAGCGCGAGGGAGACGGCGAGCGAAATGGAGAGAGACACAGATATA  
ATTCGACACCAAATTTAATGTAACACTTTANTTACTAGCAAAGCATGAAGACCTGCGAGNCCTACTTGAA  
TTCATGAGAATCGCGTAGNAGGGCAATATTAATAAATACTTTCTTTAGGTTTACAGCNCAGCGGACAGAAG  
TACCGGAACATACGTTTACTANGTGCATACATACGTATACATGCATACATGTATACATACATACATATATA  
CATGCATACATACGTGCATAGCTGTATTGTTATTGACACACGCAAAACACAAAAACAACGANAAGATTGCC  
AANACANATGTTNACTACACTTCACTTACAATCAAAGCACGGAAAACCTGCAAGGCTTACTTGAGTTCATG  
AGAATCGCATAGNAGGGCAATATTAATAAATAATTCATTTAAATTTGCAGCTTGGCATGCACATACTTNCAC  
ACATATATATGCATACGTACGANATTTTCAGACATGAAAACANGGATTANTTGATTCATGAGAATCGCAT  
AGTAGGGCGATNTNNGAAAAATATTCCATTCGAATGCGCTGGGGGNAA  
>160\_rnd-5\_family-1963\_\_RC\_\_Helitron  
TATATATATACTAGCGGGTATAGCCCGGCCTTGCCCGTGGCACTTATGTTATAAAATCAATGTTCTCGAAN  
AGCTTTGAAAATGATTTTGAGACCGATCGGACGGTNAACAAACNANTTTCATACAAACGTTTTTCGCTAAT  
TAACCACTGTTGCGGGTGGAATTTCCCAAATCGCTGAAACACGTATTCATTAAGTTCTTATGTAGAGCTTT

AAAAATAAGTTTGAAGCAAATCGGACACCACTTAAAACCTTCGCCCAAAAAATCTTTGAATCGCATTTTCTA  
CCGAAGGAGTTTATAGATTTTTCGCAAAAAATGTGAAACACGTCTCAAATGATTTTTTCATATAGAGCTTTGAAA  
ATGAATTTGAGCGCGAAACGTCACCACCATCTTCCCCCATTTCCACCAAGGAGGAATACATTTTTTGGAAA  
AGTGTGAAACACCCCTCAAATGAATTTGAACAAAGAACTTTGAAATTGAGTTTGAGGCCGATCGGATGGT  
AAACAAAAAAGTTTCATACAAACGTTTTTCGCGATTTTTCCATACTTGCGGGTGGAATTTCCCGAAACCCC  
GTCTTAACGTGCACCTTCATCACATAAGGTAACACTACAGTGAAAATTTTCAGCTTCCTAGCTCTTACGGTTTG  
GGCTGTGCGTTGATCACCAATCAGTCAGTCAGTCAGTCAGGACAAACAGTTTTATATATAGAGATAATTTG  
ACTATAATTCGGGGTTTATTGGTTGCA  
>9\_rnd-5\_family-300\_\_LINE\_\_I-Jockey  
GACGTGGCGGGGCATCCNNGNGGCGAATTGCCATCAACAGGCAAAAAATCGGTATGCTCCACATTCGCGAT  
CCGCAGAGATACGTTCGCCAGGAGTGTTCTCTCCAAGGCGAACTCCTTGAACACAAAGACGGCCACCGCTAC  
CTTGGAGTCCACCTCGATCGCAGGCTCACTTGGAGCAAACATATAAGAACAGTATGTCATAGCTTACGAC  
AAAAACTAAAAAGTATAACATGGCTCTTAAAGGAAAAACANCAAGCTCTCTCTGAGCAACAAGGTGCTGTT  
GTACAAATCCCTACTGGCCCCAGTTGGCGCTATGCAAGCCAAATCTTCGGCACTGCAGCAAAATCCCATT  
GGAGGAAAATTAGTGCTTCCAATCCAAGGTGCTGAGACTAAGTACTGGGGCCCCCGGTACATCCGCAA  
CCGGGCCTTAGCAAGAGACCTAAAAGTTTCCTTGGTGGGTGACCTTTTACGACAGCAGTCCACTAGCTAC  
ATGGCCCGTCTTTCTGTCCACCCCAATATATTGGCAAGAAGGCTTTGCAGAAGAAAGCGACGGAGACTTC  
CGCAGGATCCACCCCATCGACCTCCCAAACCGGGTACTTAGATAAGGAAAACATAAACCAAANAACAATT  
CTAANACTTAATATGTAATGTAAAGTATGTTTCANTCCATTATTGTAAAGCTAGGTAAAGATGCTCAAGCAT  
AGTTTCAACAAATTAGCTAATAAAAGAA  
>9\_rnd-5\_family-831\_\_LTR\_\_Gypsy  
GAAAATGAAGAATCAGAGAGCAAATAAAGAGACAGACTACGCCAAAAATTTCCAATCCAACGCGAAAATA  
ATAAATAATACAAAATATAATAAATATATATATACATATATCAGAAATTTTTTTTTATAAAATAAAAAATAT  
TTATATTTATATATATATATATAAACAACAAAAAATTGTATTATAAAATAGAAATATATATAACATTACAT  
AAAATTAAATATAATTTTAATAATTACACAATATAATATTAAATAACTACATAATATTACGTTATTTCTCT  
AAAAAGGGAGGTGTAGCATGTTACATGCAAATAAGCATATGCCCAACCATATTGCAGTGTATACAATATGT  
AAAGTGGTCATATGCCCAATCTCAAAGTTAGAGTATCAAGCGCATTGTTTACATAATACAACACTACCGCCA  
AGTGCCGTAAATATGATCAGCCACTTATATGTGGACTGGCCTGCAGCGTGAGATCTGCAGCGTAAGCACTA  
TGACGTTTTGACCGTTCGGTCCCAAGCGCATTCCAATGTATATGCCTTCTGCGTGTACATATAACAACATA  
TATAAATACATATGGCATGCTATGTACTCCCGTTCTGCCGCTGCTTTGAGCGACAGAACTCCAAACTCTAT  
TATGTACTTTAGGCTAAGTCCATTTTAAATAAGAGAGACGAATTCATTCTGAATCTGACCAACTACGAAAC  
CACTACCGTTCTTATTCTTAC  
>Ref\_dvir\_1054  
GCGCTAACTGCGCCCTTTGAACACCCAGCCAACCATGCTGGGATGCAAAGTCTACAAACTTTAGCCAATC  
AGACGGCAGCATAAAGAAATACTCCCAGTAATTTTTCTAATCGATTACTCGACCTACACTTTAAAAAATTG  
GCCACCACCACTCTACGGACTCGTAGCATGATCTCAATGCTGACCCAATCCTTCACAAAAATGTCTCAAAT  
GATGAAAGATCAAACCAGCGTCTCCTAGAGAAGATTAGAGGTATGGTCAATGATATTAGGAGCCTCATTG  
ACCTTGCCACCAAAAAATAGTGGAATAAGTGTTTTGGAACGCCTGTTCCGGTATAGAGTAGAGCGCTTGA  
AATTAAACATTTCATAGAACAACACAGCCAGATTCCTTACTAATTAATGAAACCCACATCTGTTCCAGA  
AAATTTCATACGAGTTCCAGTATACCCTCTCCATAAAGCTAACCAATTTAATGACGCCCCACAGGGAGGCG  
CTGCTATACTTATAATTAATTACTAAATTATATTAAACAATATTCTCTTAGCCCCATCACACTTAGTTTCAT  
GCAAGTAGCAGTGATCGGAATAGATTCATCACAAGGCGATCTAGTGCTACCGTCTATATATTGTCTCTCCA  
GGTACAATTCCATCGGAACATAAATTTTCATGACCTTTTTGACTCGAGGGTAACAAATACAAATTCGCTG  
GAGATTGGAATGCAAAACAT  
>160\_rnd-1\_family-143\_\_Unknown  
TGCATGCATGCATACATGCATACATGCATACATGTATACATACATACATGCATACATACATACATACATGC  
ATGCATACATACATACATGCATACATGCATACATACATACATGCATACATACATACATACATACATACAT  
ACATACATACATACATACATACATACATACATGCATACATACATACATACATGCATACATACATACAT  
ATACATACATACATACATACATACATACATGCATACATACATACATACATACATACATACATACATACAT  
ACATACATACATACATACATACATACATACATACATACATACATACATACATACATACATACATACATAC  
ATACATACATACATACATACATACATACATACATACATACATCTACATACATATCTACTTACCCGCC  
CCGCCTCCTCCTGCTCCNCCGCCGCCAGCTGCTCCTCCGCGCCGTGCGAGGCCAACGTTTCCTGCCTTGTT  
GAATTTTCAGCAGAGCCTACTTGAATTCCTTGAGAATCGAGGAGGAGAGCACTTGGTAGAAATTCGTTTTATT  
TAAATTTGCAGCACAGCGACAAATAAGCTTGGTCTGCGTTTGGTATTAGAAAACAAACATGCATGCATAC



GGAAAATCTATCCCTCCTTGGTGGAAATGGGGGTCAAAGATTTGGTGGGTGACGTTTCGCGCTTAAATTCA  
TTTTCAAGGATCCATANGAAAAATCATTGAGACGTGTTTCACATTTTTCGCAGAATCAAAGCATCCTCGG  
TAAAAAGTGCAATTCAAAGATTTTTTGGTGANGTTTTAAGTTTTTCCGATTTGCTTCAAANTTATTTTCAA  
AGCTCTACATAAAAACTTAATGAATACGTGTTTCAACGATTTGGGGAAATTCCACCCGCAACAGTGGTAA  
ATTGGCGGAAAACGTTTGTATGAAAGTTGTTTGTGTTACCGTCCGATCAGTTTCAAATCATTTTCAAAGCT  
TTTTGAGAACATTTATTTTATACGTGCCACGGGCAAGGCCGGGCTATACCCGCTAGTAATATATAAATATA  
T

>Ref\_dvir\_947

AAGGACCAGCCCGTAGTATCAATAGCGCGTCGGCTGAAACGTGAAAAATTAGCTATAGCTAACCGCGAAT  
TTGACTACATGCTGAAGCAGGGTATTTGCAGTCCAAGTCAGCAGCCAATGGGCAAGCCCACTACACATGC  
CAGCCAAGAAAAATAACGAATGGCGGCCATGCGGCGACTACAGACGGCTAAACCATATCACAAAGCCAC  
ACAGGTACACGATCTCCATTGCCTCATATTCATGATATCACATACAAACCTGAGTGGCAAGTCAATCTTCAC  
GACAATTGATCTAGAACGAGCATATCATCAGATACCAATAGCCACAGAACACCGCAACAAAACCGCAAT  
CATCCACTATATCTGGACTCTACGAATTTAAAATAATGACATTTGGGCTATGTAACGCCAGCCAAACATTT  
CAACGATTCATGGACCAAATATTTTCGTGATATGCACAATGTCATAATCTACATAGACAACATCTACATCGC  
AAAATAAAGAGGAACATTATCAGCACGTCAAGCATGTATTTGGCAGACTACGGCAGCACAGACTACGCAT  
AAACGCCTCAAAATACATCTTTGGGCAACCACAAATGGATTTCTTGGGTTATCATGTCACAAAGACCGGC  
ATAACTCCGACCAAGGATCGGATACAGGCAATCATAGATTTCAGAAGACCCACACTGGCGCACGAGCTCA  
AAAAGTTT

>Ref\_dvir\_751

AGGCTTACAGTGGCTCTGAAGAAGACAAATCTTAACTGTGCACAAAAAATTAAGGGTGTTGTGAGTGAAT  
GCAACAAGAATTTAACGTGACAACGTTTTTCAGAAAATAACAAAGAAAAATACAATCCAAAATGGTAGCA  
AATTCAAGAATATTACTCCTTTTAATGGAGAAAAGTAAGTATATTCTGTATGGAAATTTATTTTGATGAAT  
CTTTTTGTTCAGAACGTTTATATGTTATTGAAAAGGAGAAACCGGAAAAAATGGGCTAAGGCAGAGGGAG  
CAGCAAACAGTATAATAATTAAATTCCTTACCGATTCGTTTCTGTCAATTTGCTGAGAATAAGAATTCTGCA  
AGGGAAATTTTAATGAAGTTAGACTCAGTGTTTCGACCGTAAAAGTTTAGCCTCGATTGGTTCACTTTAAAA  
AATTTGACGAATTTATGAATGAGTTAATAGCATCAGGAGCTAAAATTGAAGAGGTGGATAAAGTGTCA  
CCTACTTTTAACTTTACCTTACACATATGATGGATGGCAAATGCTATTGAAAACCTTGTAATTGAAAACCTG  
ACTCTGCATTTGTTAAAAATCGACTACTTATCATGAGATCAAACCTTAAGAATGCTAGTAAGAATACGAGCT  
TGCAATCTGAAACTCAAAATGGCAAAAATGGCAATAAAACAGGACCGTGGCTTCTTAAATCAAATATTTG  
CCCCA

>160\_rnd-1\_family-182\_\_Unknown

AAAATCCGTTGCATACCCGAAAGGGGCGTCTGTTGGCAACCGCTGGCTGCCGAGATTTTTCTTAAATCTG  
CCAAAATACCAGGCGAACAGAAATGCCCAGAAGGTCGACAAAAAATATTTTTAGCTGCCGAAAAATTTCA  
TTGCATACCCAAAAGGGGCGCCCTNGTCGGCGGCCGGGTCCCAAATTTGCCCTAAAATTCCTCAATA  
CCAGGCGAACAGAAATGCCCAGAAGGTCGACGAGTGGTTTGAATAAAAAATTTTCATTGCATAGCGTAAAG  
GGGCAAAAATGTAACCTCAATTTAAATGAGTGCTGTTAACTAGCAGTTCATGTNAAATGAGCGCTGTAAGC  
CGGCTGTTAAGCAACAGCTGCAGCTGCAGCTCATGTAAAAGGGCTNCTGAAAGAAAAAGCATACATATTT  
TTGGACCATTTCCATGCGCATTTTGCAGGGATCTGGTCCTTTAGGTTTCGCNAGGACTATATCGATGGTATG  
GTATAACCAAGGATATGCTAGTCAACTAGGAACCATCCAGGGAGCGGGGCTGTTGNTGGGGGCGGCTGTA  
AAAGAAAAGCATACATATTTTGCGANAACCTTGTCTTTAGGTTTCGCTAGGACTATATCCATGGTATGGAA  
TAACCAAGGATATATAGGTCAACTAGGTACCATGAATAGCGATCATTGTGCTGATTAATGTTGTCCATGG  
GCGT

>Ref\_dvir\_962

ATATCAATATCAATATCAATATCAATATCAATATCAATATCAATATCAATATCAATAGCAATATCAATATC  
AATATCAATATCAATATCAATATCAATATCAATATCATATCAATATCAATATCAATATCAATATCAATATC  
AATATCAATATCAATATCAATATCAATATCTATATCAATATCAATATCAATATCAATATCAATATCAATAT  
CATATCAATATCAATATCAATATCAATATCAATATCAATATCAATATCAATATCAATATCAATATCTATAT  
CAATATCAATATCAATATCAATATCTATATCAATATCTATATCTATATCTATATCAATATCAATATCAATAT  
CAATATCAATATCAATATCAATATCTATATCAATATCAATATCAATATCAATATCAATATCAATATCAATA  
TCAATATCAATATCAATATCTATATCTATATCAATATCAATATCAATATCTATATCAATATCAATATCAAT  
ATCAATATCAATATCAATATCTATATCAATATCAATATCAATATCAATATCAATATCAATATCAATATCAA  
TATCAATATCAATATCAATATCAATATCAATATCAATATCAATATCAATATCAATATCAATATCAATATCA  
ATATCAATATCAATATCTATATCAATATCAATATCAATATCTATATCAATATCAATATCAATATCAATATC

>Ref\_dvir\_363  
AAAGCTAGCAAAGCTAGCAAGAGCTAGCAAGAGCTAGCAAGAGCTAGCAGAGAGCTAGCAAAAAGCTA  
GCAAGAGCTAGCAGAAGCTAGCAAGAGCTAGCAAAAACCTAGCAGAAGCGTAGCAGAGAGCTAGCAAG  
AGCTAGCAGAAGCTAGCAGAGAGCTAGAGCTAGCAAAAAGCCTAGCAGAGAGCTAGCAGAGAGCTAGCAG  
AGAGCTAGCAGAAGCCTAGCAGAGACCTAGCAGAGAGCTAGCAGAGAGCTAGCAGAAGCTAACAGAGA  
CTAGCAGAGAGCTAGCAGAAGCTAGCAGAAGCGTAGCAGAAGCTAGCAGAAGCTAGCAAAAAGCTAGCAG  
AAGCTAGCAAAAAGCTAGCAGAAGCGTAGCAGAGACCTAGCAGAAAGCTAGCAAGAGCTAGCAAAAGGCTA  
GCAGAAGCTAGCAGAGAGCTAGCAAAAGAGCTAGCAGAGAGCTAGCAGAAAGCTAGCAGAAGCTAGCAA  
AGACCTAGCAGAGAGCTAGCAGAAAGCTAGCAGAAGCTTAGCAAAAACCTGACGAAGACCTAGCAAGACC  
TAGCAAAAAGCTAGCAAAAAGCTAGCAGAAGCTAGAGCTAGCAGAAGCCAAAGCTAACAGAACTAGCAAG  
AGCTAAGCAAGGCTAGCAAAAAGCTAGCAAAAGCTAGACTAGCAGAGCTAGCAAAAGCTAGCAAGAGCTAGC  
AGACCTAGCAAAAGCTAAGC  
>160\_rnd-2\_family-179\_\_RC\_\_Helitron  
ATATATATATACTAGCGGGTATAGCCCCGGCCTTGCCCCGTGGCACGTATAAAATNAATGTTCTCAAANAGC  
TTTGAAAATGANTTTGAGACCGATCGGACGGTAAACAAACAACCTTTCATACAAACGTTTTCCGCCAATTTA  
CCACTGTTGCGGGTGGAATTTCCCAAATCGCTGAAACACGTATTCATTAAGTTCTTATGTAGAGCTTTAAA  
AATAAGTTTGAAGCAAATCGGACANCACCTTAAACTTCGCCNAAAAAATCTTGAATCGCATTTCTACGAAG  
GTTTAGATTTGCGAAAAATGTGAAACACGTCTCAAATGATTTTTTCATATAGATCCTTGAAAATGAATTTGA  
GCGCGAAACGTCACCCACCAAATCTTTGACCCCCATTTCCACCAAGGAGGAATACATTTTTTGGAAGAGTG  
TGAAACACCCCTCAAATGAATTTACAAAGAACTTTGAAATTGAGTTTGAGGCCGATCGGATGGTAAACAA  
AAAAGTTTCATACAAACGTTTTTTCGCGATTTTTTCCACACTTGCGGGTGGAATTTCCCGAAACCCCGTCACT  
AGGTAACCTACAGTGAATTTAGCTTCTAGCTCTTACGGTTTGGGCTGTGCGTTGATCACCAATCAGTCAGT  
CAGTCAGGACAAACAGTTTTATATATAGAGATATACGATATGTACATACATATATCTTTTTAT  
>Ref\_dvir\_1019  
TTAGGCCAAAAGGGATGACCGTAAATTGGTAGAGGGCTCTACCTGGCATTGTAAGGGCTGTTTTATCCCG  
AGAAGTTGGTTCTGGTGGTATTTGCCAATAGGCATCTTTTAAGTCAAGGCTAGTTATGTACTCTGCCTTCG  
GAAGACGGCTGAGTATCCCGTCGATTAGCGGCATGGGATATGCGTCTTTTCGTGTTACTTCATTGACTTTA  
CGACTATCAATGCAAAGTCTGACTTTGCCGGGCTTGCGCACAAGTACCACAGGCGACGACCAGGCACTGC  
CTGACTCCTCAATTACACCTAGTGCAATCATGGGATCAAGTTCATCGAACATTATCTTTTCGATCGCTGGA  
GAGACGGCATAGTGTCTTTGTTTAATTGGCTTAGAATCGCCAACATCAATCACATGCTCAAGAAGGTTTGT  
CTTCCTAAGCCATTTTCAAATTGGCAGAATTCGTTAAGACGGACGGCAGTAAATCGAATTCGGCCCCAAA  
ATCAATACCTAAGTAAAGATGCTGAATTAACGATGGGACTAGATAGAAGGTCAAAGTCTTGGTATTTCT  
CTATACTGTACTTCGGTACGTAATTTTCCGACAACCCTCTGTGTGTTACCATCTGCTGTACGTATAGTAGAG  
CACAAAAAGTTTGTGGAGGTATTCGATCTTGTAATATGTTTTTAGCAAAGCTCCCACCAATG  
>9\_rnd-3\_family-227\_\_RC\_\_Helitron  
AAAAGATTACCCGTATGTATACANACTAGCGGGTGTAGGCCTTGCCCCGTGGCACGTATAAAATAAATGTT  
CTCAAAAAGCTTTGAAAATGATTTTGAAACCGATCGGACGGTAAACAAACAACCTTTCATACAAACGTTTT  
CCGCCAATTTACCACTGTTGCGGTGGAATTTCCCAAATCGTTGAAACACGTATTCATTAAGTTCTTATGTA  
GAGCTTTGAAAATAAGTTTGAAGCAAATCGGANAAAACCTTTAAAAATTCCGAATCGCTTTCCACCGAAGG  
AGCTTAGATTTGCGCAAAAATGTGAAACACGTCTCAAATGATTTTTTCATATAGATCCTTGAAAATGAATTT  
GAGCGCAAAACGTCACCCACCAAATCTTTGACCCCCATTTCCACCAAGGAGGAATACATTTTGGAAGAGT  
GTGAAACACCCCTCAAATGAATTTGAACAAAGAACTTTGAAATTGAGTTTGAGGCCGATCGGATGGTAAA  
CAAAAAGTTTCATACAAACGTTTTTTCGCGATTTTTCCATACTTGCGGGTGGAATTTCCCGAAACCCCGTC  
TTAACGTGCACCTTCATCACATAAGGTAACCTACAGTGAAAATTTAGCTTCTTAGCTCTTACGGTTTGGGC  
TGTGCGTTGATCACCAATCAGTCAGTCAGTCAGGACAAACAGTTTTATATATAGAGATNTATA  
>Ref\_dvir\_803  
TGATGCATCACAAAAGATATGTAGTTCTGCTGCTGCTGTTATATAATCCCCATGTTATATATCGTGGTATG  
CGTATGTTTGAAATATTGAGCAAGGCCGTTAAAAACTTCTCCCATTTCTTCTGACGGCTGCAAGCAATAC  
GTCATCCCAAGTCAATCTTATCCTTCCATAGACGCTGCATTAGTATTTTCCCGGTTACAACAATCGGACTC  
AGCCATCCCATAGGATCGAATAACCTCGCAACTGTTGACAGTATTGACCGCTTCGTGCGTAAGCCTACTGA  
TAGATCAAAAATTTAAATGAAATCGAAATTCATCCTCCACGGGCTCCAATGTATACCCAGCGTACGAATTGT  
GTCCTCGCCATCAAGGTGCAACAATCCCTTCGTTTCTCGAAATTCGATAGGTATCTTTTCTAACAATTTTGG  
GCAATTACTTGCCCACTTTCTCAACTCAAATGTGCCACTGCGTAACATACCAATGACTTGACTCTGGATAG  
CTGCCGCCTCTGCAACACTATCCGCTCCAGAAAATATGTCATCAACATACATCTGATGTTTCACCACATC



TACTGCCAATGGGAATGTCCCCTTTTTCGTCCGCAGCTAACTGTTGCATGACTCGCAGAGCTAAATAGGGTG  
CTGAAGTAGTTCCAAACATAACTGTTAAGCACGCATACTCTTCGATGTC

>160\_rnd-5\_family-982\_\_RC\_\_Helitron

CAATATCATATCAATTATTTGTACATCAAGGGATGCTTAACAAATACTTTCAAGGTGCTTGAGATATATAT  
ACAGATATAACAATAACAATTATGTATATTTGCGTTGATATAATTACGTTATGCATATGCGGTTTTTATACC  
CTTGCGAGAGGGTATTATAATTTTGTCTGTGAAATGTGTAACGCATAGAAGGAGACATCTCCGACCCCATAA  
AGTATATATATTCTTAATCAGCATCAACAGCCGAGTCGATNTGAACCAGTCCCTCAGTTTTAAAGCTATCT  
TAATGAAACTTTGCAGAAGTCCCTCTTTCTGTTGCACGCAGCACATATGTGAAAACCAGCTGGATCGGACC  
ACTATATCATATAGCTGCCATAGGAACGATCGGTGCGAAAATTAAGTTTTTGTATGAAAANACATTTTGT  
TCAAGATATCTTGACCAAACCTCGGCATTTATTAGTTTTACTATGCTCCTCATATATATGCAAAATCCTATTA  
AGATCGGACCACTATATCATATAGCTGCCATAGGAACGATCGGTGCGAAAATTAAGTTTTTGTATGAAAAA  
CTTGTTTTCCCGGTGCTTCTTAGATAGGGGCAAAGCACTATGAGCATTATGAAAAGGTTGGGTCTGCAAGG  
GTATTAGATCTTCGGCGTGCCGAAGATAGCCCTTCTTTCTCGTTTCATT

>Ref\_dvir\_267

GTCTGTCGTCTGTCTGTCTGTCTGTCTGTCTGTCTGTCTGTCTGTCTGTCTGTCTGTCTGTCTGTCTGTCT  
TGTCTCGTCGTCTGTCTGTCTGTCTGTCTGTCTGTCTGTCTGTCTGTCTGTCTGTCTGTCTGTCTGTCT  
GTCTGTCTGTCTGTCTGTCTGTCTGTCTGTCTGTCTGTCTGTCTGTCTGTCTGTCTGTCTGTCTGTCT  
GTCTGTCTGTCTGTCTGTCTGTCTGTCTGTCTGTCTGTCTGTCTGTCTGTCTGTCTGTCTGTCTGTCT  
TCTGTCTGTCTGTCTGTCTGTCTGTCTGTCTGTCTGTCTGTCTGTCTGTCTGTCTGTCTGTCTGTCT  
TGTCTGTCTGTCTGTCTGTCTGTCTGTCTGTCTGTCTGTCTGTCTGTCTGTCTGTCTGTCTGTCTGTCT  
GTCTGTCTGTCTGTCTGTCTGTCTGTCTGTCTGTCTGTCTGTCTGTCTGTCTGTCTGTCTGTCTGTCT  
GTCTGTCTGTCTGTCTGTCTGTCTGTCTGTCTGTCTGTCTGTCTGTCTGTCTGTCTGTCTGTCTGTCT  
GTCTGTCTGTCTGTCTGTCTGTCTGTCTGTCTGTCTGTCTGTCTGTCTGTCTGTCTGTCTGTCTGTCT  
GTCTGTCTGTCTGTCTGTCTGTCTGTCTGTCTGTCTGTCTGTCTGTCTGTCTGTCTGTCTGTCTGTCT

>Ref\_dvir\_703

GTAAAAAGACTTCTGCAAAGTTCAATAAGATAGCTAAAAACTAGAAAGACAAGTTGGCATAGAAACAGAC  
AGACGGACAGAGGGACTCGAATTGTGGATGTTATCGACTATCGGAAACAGCGGTGCCACTGTCAGCAGTC  
TTATTCTGTCTGGGCACACTAAAATAGTCGCAGGCACCCTTGGGGTTCCCTCGTTGCGATTTATCGTTATCC  
GATAAAAAGGCTGTTTGGTATATCTATGCATTGTATTATTAATGCAAAACCATGATACAAAACCAACTTTT  
CCCCATTTTCACTGTATTTAGGGTATAGCAGAATCAGCCCCAACATTTTGGAGGAACACGGCAACGCCCC  
GCCATTTTCGCTATCGCACGACCGCCCGGTTCTTAAATTTGAGCCTTGACAGTTAGGGCCAGCATGAAAAAA  
AAACATTCACAGTAGTGACGAAGAAATTTGAAAAGAATTATATTAACCTTACTTAAGAACGTCCCTATCG  
ACCAACCCCTTTAATAAAAACTGTCTAATATTGGCCTTTTTCTACCACGCCTTCTGTGCAGCCAGTCCGCT  
GAACAACGGCACGAGGGCAAATTTGTGAAAACGTTGAAAACGTCCGTCTGTCTGTCCCTATGTATGAACAT  
GACTTGACGCCTCCAAATTTGGCTATATATGAGGAGTATAG

>Ref\_dvir\_876

ACCCGAACACTGTGTTTTGGGCCAATGGTGCGCCGCCATGGCTCGGCAGGACGCCTTGGAGAATCAATTC  
GGCGAAGATGTCCGAGCCCAACACCAGATTGGAGATTTCCGGCTGGAACCAGCGATCGTCTGCCAGTCGG  
ACGTTGTTTCAGTTTCTCACTGACGAGCTTCGATGGAGTCCGATACCGAAGATTTGGCATCACCTGCAGGAT  
GAACTCTCGCTGGAAGCTAGAGGTCTGGAACGGATAACGGCCGAACAAGCGTTGTCTGTACCGACGCGG  
GTGACGGATAGCCCGAAGGCCTTTGCCAAAGATGCGTCGATAAGACTTACCGGACAGCACGGGTCTAAAA  
GTGTCCGAGTGTGCGGGGTCGCCTTGCCGTTTCCAAGTCGGATGAATGCTCTCGGGAGCACGGTTGTCCTT  
TTGTGTTCCATTAAAAGTCGACAAGGAGTTGGAACCAGCGGATGAAGGCGGCGCGGAGCGACGCGCTTG  
GGCCTTGGTGCTGCGCATTGTTTGGGATCGCTCTGGAGATCGCGATGGCATGCGACGCGCTTCTTGGAAT  
GAAGCAAGGTGTGATGGTCGCCTGGCACTTGCGGCACCTTGTCCTTGCGGCGACAGGACTCCCCGGAATGT  
TGGTGTGCCAGGCAGTTTGGGCAGTATTTGTTGACCA

>Ref\_dvir\_740

TTTGTCAATTGTCAATTTGTTATGGCTTGAATTAGGGACGAGCGCTATTTACTCAACCTGTTTAGTATTTAAA  
AGTAACTAGTTACTGCTGTTACACTTTTCAAAAGTAACAGCGACAAAAATCATCCAATGACATGCACAGA  
TAGTAAAGCAAGGGTCTACATTTTGGTCGTTATTTACTTAAAAGATTGACACCGAAAAAGAGATTACTAC  
GACGATATAACAAATGACTGGATCAATGCTAATGGCTTAATTTGTATTCACTTTACACGAAGATATACTTT  
TTAATGTTTATTTTTATTTTTACTTTGTACAGGCCTGTACTCAGGCTGTTTCTTTCTGACTGGCTACAAAG  
CTAAGAACTATGAAAATGATGTGTACCTGGCTGTTATTTTGAAGTTGCAACTGCACAGCCTCACTTACAAA  
AATCGTTTAAATTTGTGCGAACGTTTTTACCTTATCTTAAAATGGATAAAAAACGAATGAAATTTGGTCCT

TATTTAGGGCTGACGACGATAAATTTGCAAAATGCATTATTTTCAAAGAAAAGTAATCCTATAGTTTCCTA  
CAAATTTAATAAAAATAAAAAAAAAAAAAAATTGTTATACAGCCTAACAAATATTAATAATTTAATTGGTTTCCT  
TATATATATTAAAAAAATTGCTGCGC

>9\_rnd-1\_family-244\_\_Unknown  
GGATGGCAATCGATAGTTGGGATCCGTACGAGTCGAAAGAGGTATATNATTCCGCAATCGGACTGTATTT  
ACCCGAGATATTTcanttanAAATTTGTATGATATGCTTAAAAAGGTTATATATTCGCCAAATTAAGACCG  
ATCGTGATCGCGAAATCATACCGTATTTGTCCGAGATATTTAAATTATTTAAGTATTTcagTTATTTAAATA  
TCAAAGTCCCGTTTCCTAAGAGTAATATCGTTTGAGCCTCAGCGGATTTTGTAGCTTTcagCAAAATCGGC  
CTCGCTTGCCTACGAAACAGAAGACGGTTCCTAGTTGACCCANATATCTTTGGTCATCATACCACGGATAT  
AGTCCTGGTGAACCTAAATCCCCAAAGCACTAAGCCTTGCAGAATGCGCAAGGATATGGTCCAAAAATAT  
GTATGAATGCCCTTCTTTCATGCCCTGACCCATACCCTGATGCCCTGAAAGTCTCCTTTTTTCAGCTTTT  
TAAGGACTTTcGTCTTTTTATTGCATACTCCGAATCAGCAGGACGAGGACTTGCTTTGGGCCAAGGCACA  
TCGCAATAGTCCTTAAACAGTCCAGTTAGGCGTTAAATAACGTTACGATTAACAANTTCTTTTGAAAATA  
ACGTTCATTTTTGGTCGACG

>160\_rnd-5\_family-1191\_\_RC\_\_Helitron  
TtactGCTAAAGCAAANGAGCTCGTNGCGCGAGCTGCGTTTGGTGTtgATAGAAGAGGGTTNAGGGTATC  
CCCTAGTCGGGCGCTCCCGACTAGAGCACTCTTACTTGTTTTTTTATACCCTGAACCCATTGAAAATGGGT  
ANAAGGGTATATTGTATTTGTGCGAAATCAAATGTATGTAACAGGCAGAAGGAAGCATCTCCGACCCCAT  
AAAGTATATATATTCTTGAGCACACAGCCGAGTCGATCTAGCCATGTCCGTCTGTCTGTCCGTCCGTCCGT  
CCGTATGTATGAACGCAAGGATCTCAGAACCTATAAGAGCTAGAGACTTGAAATTTTAGATGTAGGTGCT  
CCTAGTGCCCGCGCAGATCGAGTTTGTttCCGATAATCGATAACTTGCTCCGTTTCCAAGCAATCGATAAA  
AATCGATATCGATATCCTGTTTTTTGGGCAATTTTGGTAAATAATAAGAGCTAGAGTCACCAAACCTTGACA  
TATAGCTTCTAAAATAGAATATATATATGCATTTGATGTTGGAAGAAGAGGGTTCAGGGTATCCCCTAGTC  
GGGAGCTCCCGACTAGAACCTCTTACTTGTttTATAGCTTACAAACNCTTGGCAATNATNTGTANATAGTG  
CGGCATTAGTGTATATTA

>9\_rnd-4\_family-305\_\_RC\_\_Helitron  
TCGATCCTCAGTTTAACTTCTTGTGTGTGAAAATATAGATAAATATATATTTAGAAATATTTTTATACCCT  
GAACCCATTAAAATGGGTATAAGGGTATATTGTATTTGTGCAAAATCAAATGTATGTAACAGGCAGAAGG  
NAGCATNTCCGACCCATAANATTCGTTTTCTTGANCGGCATCAANAGCCGAGTCGATCTACCATGTCCGTC  
CGTCTGTCTGTCCGTATGTATGAACGCGNCGATCTCGGAANCTATAAGANCTAGNACTTGAAATTTTAAAT  
GTAGGTTCTCCTGTGCCC GCGCAGATCGAGCTTGTCCGATAATCGATAACTTACTCCGTTTCCAAGCAATC  
GATAAAAATCGATATCGTTATTCTGTTTTTTNGGNAATTTTGGTAAATAAACTTGACATATAGCTTTTAAA  
AATAGAATATATATATGCATTTGATGTTGGAAGAAGAGGGTTCAGGGTATCCCCTAGTCGGAGGCTCCCG  
ACTAGAACCTCTTACTTGTTTTNATATATATTTAACAAGAATATGAACAAATTATAATTTATTGTAGGACT  
TTGCAGTAATATTAAAAAAAGGTGTTAAGTTAACTTCTTTCATCATTCGACATGAAATGGGTCATACAT  
ATTTTTTTTTAATTT

>160\_rnd-4\_family-307\_\_RC\_\_Helitron  
AAAAGGATCTGTTTTTTTTTTAACTTACAATTGCTAAAGGGCAATGTAGTTTTAATTTTGGTGANGCAAGC  
TTATCTGTNTTTTTATACCCTGAACCCATTAAAAATGGGTATAAGGGTATATTGTATTTGTGCAAAATCCA  
AATGTATGTAACAGGCAGAAGGAAGCATCTCCGACCCCATAAAGTATACATATTCTTGATCAGCATCAAC  
GAGTCGATCTAGCCATGTCCGTCCGTCTGTCCGTCCGTCCGTCCGTATGTATGAACGCGAGGATCTCAGAA  
CNTATAAGAGCTAGAGACTTGAAATTTTAGATGTAGGTGCTCCTAGTGCCTGCGCAGATCGAGTTTGTttC  
CGATAATCGATAACTTACTCCGTTTCCAAGCAATCGATAAAAATCGATATCGATATCCTGTTTTTTGGGC  
AATTTTGGTAAATAATAAGAGCTAGAGTCACCAAACCTTGACATATAGCTTCTAAAATAGAATATATATAT  
GCATTTGATGTTGGAAGAAGGGGGTTCAGGGTATCCCCTAGTCGGGAGCTCCCGACTAGAACCTCTTACTT  
GTTTATTTATGTTTTATGGCTTAAATTTTAATCACTTGGACCTGCACCTATCTAATACTAGATCCGCTCTCTT  
TTTCTTTT

>Ref\_Skippy  
GAGGGGGACAACATAGATAGCAAATAAATCATCCAGTAATTCGCTGGTTGTTGTTGCCGTAATTGACTTT  
GTGATCTTAACGTCCAACCACTTTGAGTATGCATCCGTAACAATCAAAAGCATCGCACCTTCAAATGGTCC  
CGCGAAGTCGATATGAATGCGCTCCCAAGGCGACTTAGGGTATTCCCAATAGTGATCGGAGCATTTTGA  
GGTCGATTTCGATGTTTTGCACAGAACTCGCATGTTATTGCCGCACTTCGATGTCTTTATCGATTCTTGGC  
CAGTAGACGAAAGAGCGTGCAATACCCTTAATTTTTACTATATCCAAGTGGGCCCTGTGTAGTTTCGTCCAG  
GATCAGTTTTTGAAGTTTAGTCGGGATAACCACACGATGTTCAAAAGTAATGCAGCCAAATGATATCTCAT

ACTTGCACCTCTGGTGATTTGTATCCATTTCTTGTAAGACATTGGCCGCTCTCCAGTATTTGCAAGATTTTGC  
CCAAATGCTGGTCTTTTCTGGTTTCTCGAGCAACTAGCGAAGCTGTAAGCTGGAAGCTGATTTATTTGTCGT  
ATTATAAAAAATGATCGAATTCGTCCCGATTTGCTGTGTTAGAATGGATACCATTACTCGTGTTGAGT  
>Ref\_dvir\_519  
CGGATCCAGTGTGGGGAATTCGTATATGTGTGCGTGCATACATATTTAAATGCGTAATTACATATCTGCCA  
GCCAACATTAAAGTATGCGTGTATGTATGCATGCTTGTATTTACATGTCGTTATGCATTATGCACATACAT  
ACATACATACATACATACCATACATATTTATACAAATGCAAAACAACCTCATCACAAATATTTAAATGCACT  
AAATATATATACATATATATCACTCAGAATTCAAAAAATATTTAAATATGTACATAATATTATATCATCACAA  
ATAAAATGAATCATACATTAAAAAATCATACCTATTACTATTTTTTATATATCCATTAACATATTAGCATC  
ATTATCATTATAAATATATATATTAACCTACATACATAAATATATTCATGATAAAATTATGTAAATACATGC  
AATCATGCATGTATGCATGTATTAATACATACATACATACATACATACATACATACATACATACATACAT  
CATACATACATACATACATACATACATACATACATACATACATACATACATACATACATACATACATACAT  
ACATACATACATACATACATACATACATACATACATACATACATACATACACACAACACACCAAACA  
>9\_rnd-5\_family-12184\_\_Unknown  
GAGATATGTCGTTTCAAAACGACATAATCTCGCGCAGATCAACGGCGGAGCTATGTCGACTCTTTTCAATT  
ACTCACCTTAACTCTGCCCAAAAAAATTCCTCACAAGAAAAAACATCAGAATTTATTTATTTTTCAATATA  
TTTTATTTTGTTCATAACATCGTATTTTTCATTGCTTAATTATTATTTATATAGTTATTTAAAAATAATATATG  
TTTTACAGCATTTGAATATTTAGTTTTTTATTTNATGTATCTACACTTAGCGGGTATTATCCGGCGTTGCCCA  
AGTAAGCTTTGTCTGGTCTTTTCCAGCCTTTTTCCTTCTGTCCTCCCTTTTGTCAAGTTGTGACTGTATTTAC  
CTGAAATAAATAATATTTAATATATTTAAAAAAGTCGTCGTTCAAAAAGTAGACAAAACGTGATGTAAT  
CGGACATTATTTGGCCGAGATACTCAAAAAAATCAGCAAAAAGGTGTACTTTACAAACGANTCGGTTTTT  
GGTCAACAACCTTTTTTGAACCGACCGATTTGTAATTTGTTTGAATGCCATTTGATAGTAGGGATCCGTACG  
AATTAAAAAAGGTATAACATTTAAAAANATCAGACAATACTTACCCGAGATATTCAAAAAA  
>160\_rnd-1\_family-69\_\_RC\_\_Helitron  
TTTTTATACCCTTGCAGAGGGTATTATAATTTTGTGCGTGAAATGTGTAAACGCATAGAAGGAGACATCTCCG  
ACCCCATAAAGTATATATATTCTTGATCAGCATCAACAGCCGAGTCGNCATAGCCATGTCCGTCTGATTCT  
GTTTCTGTGCGAACNAGCCTCTCGGTTTTAAAGNTATCTTGACGAAACTCGGCATTTATTAGTCTTNCTGTT  
GCNCCCCGCACATATGCAAAATCCTATCNGGATCGGACCACTATATCATATAGCTGCCATAGGAACGATC  
GGTCGAAAATTAAGTTGTTGTATGAAAAAACATTTTGTTTTTCAAGATATCTTGACCAAACCTCGGCATTTA  
TTAGTTTCACTATGCTCCTCACATATATGCAAAATCCTATTNAGATCGGACCACTATATCATATAGCTGCC  
ATAGGAACGATCGGTCGAAAACCTAGGTTTTTGATNAAAAACCTTTTTGTTTATCAAGATATCTTGCCCCAA  
CTCGGCATTAACCTATTTTCCCTGTGCTTCTTAGATACGGGCAAAGCACTATAAGCATTATGAAAAGGTTGG  
GTCTGCAAGGGTATTAGATCTTCGGCGTGCCGAAGATAGCCTTTCTTTCTCGTTTTTT  
>160\_rnd-5\_family-2555\_\_Unknown  
TAATAGCCTCTGTCCACTGAACACGTTTCTTACACATTTCCGAANATGTGCGCATTTTTCGAAAGTGTAATAG  
CCTCTGTCCACTGAACACATTTCTCACACATTTCTGAAAATGTGACATTTTTCGAAAATGTGTGAAATGCG  
CCCTGTGCGTTTCCCCATAAGAAAACACATTTTACACATCTTTCAAAAAGGCACATTTTAAAAAATGTGTA  
AATTCGCCCCGAACATTTTCGTGTTTTTTGCGATGATTAATCGAGATTTCTATCGATGTTGTGAAAAATGGT  
AAAGTATCGTAAACATAAACAGCTGATATATCAACGAAGGCAAGCGGCAACTTTAAATAAGAAATTTAA  
AATTAGAATAATCCACAGTTTTTTAGAATTTAAACATGGCGAAATCTCGAAAAGAGTACCTAAAAATGGAG  
CCCTTACTTCGAGAGCGCAATTTTTGAGTTTTGGAAGAAAAAATTTACGGCGCTTATGTAAATTAAAGAAA  
CTCGATCAGCTGTTTATTTAAAGAAGCGGTACTTTTGCCACTCACATGTTACCGACAACCGGTGGAACACC  
AATATGTGAAATTTGAAAATGTGACATTTCTTAAACCAGTGGACAGAGGCTATAAT  
>9\_rnd-5\_family-589\_\_RC\_\_Helitron  
TTTTCTTCAAGGCTCGTTTTTATACCCTTGCAGAGGGTATTATAATTTTGTGCGTGAAATGTGTAAACGCATAG  
AAGGAGACATCTCCGACCCCATAAAGTATATATATTCTTAATCAGCATCAACAGCCGAGTCGATATAGCC  
ATGTCCGTCTGTCCGTCGTCTGTTTCTATGCGAACTAGTCCCTCAGTTTTAAAGCTATCTTAATGAACTTT  
GCAGAACTCCCTCTTTCTGTTGCACGCACCACTATATCATATAGCTGCCATAGGAACGATCGGTGCAAAAT  
TAAGTTTTTGTATGAAAAACNNTTTTGTTTATCAAGATATCTTGACCAAACCTCGGCATTTATTAGTTTTACT  
NTACTCCTCATATATATGCAAAATCCTATTAAGATCGGACCACTATATCATATAGCTGCCATAGGAACGAT  
CGGTCCGAAAAAACATTTTGTGTTTTCAAGATATCTTGACCAAACCTCGGCATTTACTATTTTTACTNTACT  
CCTCANATATGNGCAAAGCACTATGAGCATTATGAAAAGGTTGGGTCTGCAAGGGTATTAGATCTTTGGC  
GTGCCGAAGATAGCCCTTCTTTCTCGTTTTTTTTTTTTTGGTTTTTGT

>Ref\_dvir\_767



CACCCAAATTANCACNCGACATATATNACAATTTTCATAACAACCTTTTTTCTGTGCAGGGCGNACGCGAA  
AACGNCNTGACGANACTGACACNCAGGGCGAATAAATTAAGCTCNATCCTAATAAATGAAAATC  
ANGATTAATCGATTCTGCATTTCTGTCGCCGCTGCGCGTCGNCTACTACTTATAAATAATAGCGTTTTCTTA  
ATAATAAATAATATATAATATGTATAATTAGAATAATAATAATTAATTAATATAGAAATATGTCTATTTT  
ATAATAATTATTCGACCGCTTTTTTC

>Ref\_dvir\_579

CCAGTATTGACGCTAACCACATATTTCAAGTGACGGAATAATGCCGTTAGCAATCGTTCAACTTGGCTGAA  
AAAAAACTAATAAATCGTTGTTACCTTCACTCAATACAACTTTCCGCTATCCTTTTTTAGCATTTTCAGTC  
AGTGGGGCGGTCTCGCATAAAGCGCCGGTACCAACCTGCTGTACCCAAAAATGAGCGAACCTCTTTACGT  
GACCGAGGCACGGGGATTTCGTTTAATAGCTATAACCCGTTTCGGGGTCCATGCAAAGCGTGCCACCACCAA  
TAATGAATCCTAGGTATTTTAATGCCCATAGCAAAATTTGGATTTTGCAGTCCGATAGAGAGTTTGGCT  
TCTCTTAAGCAGCCCACTTGTGCGAAATATTTCAAGTGCGTTGGGAAATCAAGGAAAATAACTAATAAGT  
CGACCAAGGGCACAAAGACAACGTTGGACCGCAACTCGTTGGGAATTACCTTGTCCATCAGACGAACTAG  
ACGTTGGGCTGCATTGCATAAACCAATGGCATGACGCGAACTGGTATAGCGGCCTACCTGGTACGGTA  
AATACGGTATAGGGCTTGCTTTTGTCTG

>Ref\_dvir.38.98.centroid

TACAATTAGAATTTGGGCAACAAAACGATCGTATTGGTAAGTTGGCTGAAAATTTTATAAAAAATGATATA  
TTTAACTTTCTCTTTTGTATCAGGACCGCTCTCAAAAAATCATGGACGCCACGATTCTTTTTGACATTGG  
AGAAATCGATATGCGGGGCTTTTTGTCTCGATTTTCAAGGCAGGACCTGTTTGACTGGGATGATGAATCAA  
ATATTTCCGGAATTTGCCTGAATTGAAATATTCCACAACGTCACCTTTCCTCGAATGCTTCAAATTTAAGA  
CATATCATAAATGGAACAATGATTCTTTAAATTA AAAACTAAACCTAAGTGTCCGAGCTGTAAACAAGAA  
GTCGAAGAGGCAATAAGTCATGTTTTTATTTACACCTAAAAAATGTAACACCAACACTAGGTTATGGCAA  
ACAGTTAATAAAAAAAGATTTAAATAAAAAAATTTTTGAATGTCTTTGTTTTACTCTGGTTAAATT  
AAACAGTTGCGAGAATTAAGAAGAAGCGATAACGACGTAGTTGAGAGGGCTCAACTACGCGACTTGGA  
TCACCAGATTTATCAGTTTAAATGA

>9\_rnd-4\_family-621\_\_RC\_\_Helitron

CCGAGCTTCAGTCAATTCAGTTAAAAAAGAGAAAGAAAAATTTGCTTGACGNTTTGCAGTTTGCCATTTTT  
ATACCTGTACCCATTGAAAATGGGTAAAAAGGGTATANTNAGTTGCGCAAATGTATGTAACAGGCAGA  
AGGAAGCATATCCACCATCAAATGTTTATATTCTTATCCAANAGTCGATCCGATCNAGCCACGTTTCGATAT  
AAATCGATATCNAAATCNTGNTTTTTGAGCAAATCTCTTAGGTTTTNAGAGCTAATTCANAAAACCTTGACA  
TGTAGCTNCTAGAAGAGTATAAGATCGAGTATCTATCATTTTGCANCTGNCGNTGGAAGAAGNNGGGTTCA  
GGGTATACNCTAGTCGGGCGCGCNCGACTAGAGCAGCNCTTNTNCTATTTTCTTTTTAGACATTCTTTTT  
CAGACTACACCTATACCCCGCCCCTTACTCATTTTCGATGGCACACTTTTCAGCAATTTTGCTGTTTCGGCTGA  
ATTTCTTTCTTGACATTAGCTCTGAACACTACGTTTTTCGGAGGAAAAGTGTGTTCCAGCGTTGACATTTT  
AAGTTAACTTGCATA

>Ref\_dvir\_739

GATTGCCCTTTAATGGTCTTATATCACTAGTGAATCCTACCGGCTGCGCCAATTACATAACCCAACACGCG  
TTGTTATAAAAAATATAACTTTACTTTAACAGGCGCGACTTATTTGGATTTAGTGCAAAATGCAACTTGAC  
GGTTTAACCAGTAAACTCAACTTCTAAGCAAACCTCGGCTGAGGGCTCAAGATCATGAGCTCGCTCTCTT  
TAAACAATGCTCTCATTCTCTTGATGAGTTTCTAGAATATTCTAAGAGCCTGAACTTGAGCTGCGTTGGCA  
ATTTGGGCATTTGGTGGGAATAACGATTGTGGCGGATGTTTATGTCTAATGGTTTTTTGATTTTATGATCGGT  
CCCACGCCAGAATTGTATTTTCACCAAGAATTTATGATTGGGGCTCTAGGGCTTATTGTTACAAATTGGGG  
TGTCATGTTACATATGTGGTGCGCTTAGTTGCTAGGGCTTATGTGTAAGGGGTTGGCATTAGGTGCTGTGG  
ACATATGTTATATATGCTGTATTAGGATACATGAGTGTATGTGTACTTATAGTATATGTTGTGGGTGTGGT  
ACATATGTCACT

>Ref\_dvir\_911

GAATGCACCGTGAGCGCTACGAAACTGGCCAATCCTCTTGCTGTTGACGAGCCTAGAATAGATGCTAAA  
AAGAAACAATTTATATGCCCACAATGCCAAAAGGCCTATAAGAATAAATCTAGCCTCAAAATTCACATTC  
GTACGCATTCGGACGAACGACCATTTCAAGTGTCACATTGCCCCAAAGCCTTTAAACAGTTTCGCGAATCTG  
CGCTCACACATATATACTCATGAAGGTAAACTGCCTTTAAGTGTCTCACTGCAGAAAATACTTTTTAGA  
GAAAGCCAAGTACGATGAACACACGCGCTATCACATTGGGCACCGGGCTTACAAATGTCCACACTGTCCA  
AAAATCTGTACTAAATATTACAATGTTTAAAAAACACATTCTAACTCATCACGCAAATAACAGTGAGGTA  
AATGTCCAGTCCGAACGGCTTGAAATAGAAAACCTCGGAGCTGGCCGAGCAAGATAATGAAATAGGCTGC  
AGCAATGAAGAAAAGGATAAGGAAGAAAACATTAAGGAGGAACAAACTGAACTAAGCTCAAACAGCTA

CGAAGAATGCACCGTGGAGCGC  
>160\_rnd-2\_family-37\_\_RC\_\_Helitron  
TTTTTATACCTGAACCCATTAAAAATGGGTATAAGGGTATATTGTATTTGTGCGAAATCCAAATGTATGT  
AACAGGCAGAAGGAAGCATCTCCGACCCCATAAAGTATATATATTCTTGATCAGCATCAATAGCCGAGTC  
GATCTAGCCATGTCCGTCTGTCTGTCCGTCCGTCCGTCCGTCCGTATGTATGAACGCAAGGATCTCAGAAC  
CTATAAGAGCTAGAGACTTGAAATTTAGATGTAGGTGCTCCTAGTTCCCGCGCAGATCGAGTTTGTTCCTG  
ATAATCGATAACTTACTCCGTTTCCAAGCAATCGATAAAAAATCGATATCGATATCCTGTTTTTTGGGCAAT  
TTTGGTAAATAATAAGAGCTAGAGTCACCAAACCTTGACATATAGCTTCTAAAATAGAATATATATATGCA  
TTTGATGTTGGAAGAAGAGGGTTCAGGGTATCCCCTAGTCGGGAGCTCCCGACTAGAACCTCTTACTTGTT  
TTATATATGAACACTTTTCCACGTATTAATATGTCAGGGAACCCAGATAATTTTGATATATTTTA  
>160\_rnd-1\_family-171\_\_Unknown  
TTATAGCCTCTGTCCACTGAACACATTTCTCACACATTTCTGAAAATGTCACATTTTTTGACAAATGTGTGA  
AATGCGCCCTGTGCGTTTCCCCATAAGAAAACACATTTTCACACATCTTTCAAAAAAGGCACATTTTTGAAA  
AATGTGTAAATTCGCCCCGAACATTTCTGTGTTTTTTGCGATGATTAATCGAGATTTCTATCGATGTTGTGAA  
AAATGGTAAAGTATCGTAAACATAAACAGCTGATATATCAACGAAGGCAAGCGGCACAACCTTTAAATAA  
GAAATTTAAAATTAGAATAATCCACAGTTTTTTAGAATTTAAACATGGCGAAATCTCGAAAAGAGTACCT  
AAAATGGAGCCCTTACTTCGAGAGCGCAATTTTTGAGTTTTTGAAGAAAAACTTTACGGCGCTTATGTAA  
ATTAAAGAACTCGATCAGCTGTTTATTTAAAGAAGCGGTACTTTTGCCACTCACATGTTACCGACAACCG  
GTGGAACACCAATATGTGAAATTTGAAAATGTGACATTTCTTAAACCAGTGGACAGAGGGCTATAA  
>Ref\_dvir\_1033  
TGCAATGCAACAGCCGCCGAGATGCAACAGCAGGAGCCGCTTCAGCTACCGCAGATTCCACAGCTGCC  
TACAGCTCAGCATCAGGAGCCACCGCAGGTATCTCAGCCGCTGCAGCCGTGGATGCAACCGTGGAAGCAG  
CCGCAGCAGCCGTGGATACAGCAGCAATCCACGCAACTCTTTTCTTATTTTCATGTTTGACTCCCAATAAAC  
ATATGTATATATATTAATATATAGTCCCAAATAAAAAAAAAAAAAAAAAAATTCAAAAGGAACGATCACACATT  
TTACGCATGGCGATGAATAGTTTGTAATAGGCTTGCAATAAAAAATCTATACTTTGCATCTATATTTTTTA  
ATAAACATATAATGACCCAAATTGTAGAATGTTTCAACAAATATATAAACTATTTATTTAATATATATAAC  
ATGTTAACAAAATATTTATCGTCATGTTTCCTTTTACTTATTTTCACAAGGTGGCATCTTTATGTTTTCCATA  
GGTAAGCACTCTTCATAAGTTGGCAGCCCTAACATAGCGGCACTTCTGCTTTCCATGCT  
>9\_rnd-5\_family-722\_\_RC\_\_Helitron  
CACTAAGCTTTTGGAANANTTAACGCAAGCCAACGTGANTTGAGCATTTTTTATACCCTTGCAAGGGTATT  
ATAATTTTGTACGAAATGTGTAACGCNTAGAAGGCGACATCTCCGACCCCATAGAGTATATATATTCTTG  
ATCAGCATCAAGTCGATATAGCTATGTCCGTCTCTCAGTTTTTAAAGCTATCTTAATGAAACTTTGCANGAG  
TCCNTNTTTCTGTTGCANGCAGCACGTATGTGCAANAACCGGCCGGATCGGACTACNATATCATATATG  
CATTCGCTATAGNANCCAATAGATCGGTCCAAAATGAAGCTTCTTGATGAATAAACGTTCTGTTTATGGT  
TTTTGATATCTTNACGCAANCCTTCGGTTCCACTTTTCATGAGCTTTACTATACTCCTCATACATATGCAAAA  
ATCCTATNNANATCGGACNACCATATCANGCAGCTGGCTATANGAAGNNCTTCACTNTTATNACNTATCT  
GCGTTATATTACTTCAGACCACAATTTTTTACAATTTTTTGTTTTTACCTGTAATTAAT  
>Ref\_dvir\_1057  
TATTGAAATGTACACAATTAACAAAAAACACTTTGGTTTAGTTTAGTCGATTTCAATATTTATTAATTTACTT  
TTCTGGGCACGTTAACTTGTTTCACTCTCTAAGGTTTCAGAGAAGAGTAAGACTAACTATAAAAGCATTTC  
AGCATCAAACTGAAAATAACAAAAGCCTACTTGGTCAATTGTACCTTTTGTATGAATGAGTGTTTGTGTGT  
ATTTCAACACTCATTATTCGCCTCCTCAAAAGATACATAGACCTTTTGTATATAATTGTAAATGTTACAAT  
ACAGTTTCTTCTAAAAACAAGTTGTGCCTTCTGGGAACAATATTTAATGATCCACATTTGTCCAGAAATAG  
TTCTTTTCAAAAACCTAGTTCTAGGATTAAGGGAATCCAGAAAAAACCTTGATCGGATCATGACTTAAAA  
AAATTATATAAAATTAACAAAAAATATTTTATTGAACAAAATTTAGTTTGTGAGACCCAATTCATTTCTGA  
GTCACAAATCTGACTGCATGCAAGGGCTTTGTCATGATATCGGCCACTTGGTGCTC  
>9\_rnd-1\_family-477\_\_LTR\_\_Gypsy  
ATGATTTTATAAAATTGNGCGGGAACCTTCGCCCCGATCAGAGTACATGCCGGAAGGCTGTGCGAAATAATA  
GGCAGGAAAAACTGTAAACATAAATGCAAAATAATTCAATTAGCAAATTTGATGAAAATTTACCTAATAA  
TTATAATTATAATTTAATTATATATAAACCCAAAAATGGGACTAGTAGACTTAAAGACAGTGGATTCCACT  
GCTAATGTCATTAATAAAGTAGAGTCAAGTAACATGGATTTACAATTAGTAAATATACTATTGATAATAAT  
TGTGTTTATAATGTGCGCCAATTGTTTTTATAAATTATACAAGTTGCATAACAAATGCTTAAAAAGAGGTA  
TATGAGCCAGGCAAATGATCTGGACAAGATTTAAATTAACAAAAAAGAGCGCAAACAACATTGAAAAA  
AAANANAACAATAATTCCGTAATTTACTTTGTAACATTGAGAAAATGAAATAAAATTAATAAAATCAAAAT

ACAAATAAAAAATATATATAAAATATGGCTAAACTAAAGACAATTAGAGAACTTATAATGG  
>Ref\_dvir\_1030  
ATATAGAATATAGAATATAGAATATAGAATATAGAATATAGAATATAGAATATAGAATATAGA  
AATATAGAATATAGAATATACAATATAGAATATAGAATATAGAATATAGAATATAGAATATAGA  
AATATAGAATATAGAATATAGAATATAGAATATAGAATATAGAATATAGAATATAGAATATAGA  
GAATATAGAATATAGAATATAGAATATAGAATATAGAATATAGAATATAGAATATAGAATATAGA  
AGAATATAGAATATAGAATATAGAATATAGAATATAGAATATAGAATATAGAATATAGAATATAGA  
TAGAATATAGAATATAGAATATAGAATATAGAATATAGAATATAGAATATAGAATATAGAATATAGA  
ATAGAATATAGAATATAGAATATAGAATATAGAATATAGAATATAGAATATAGAATATAGAATATAGA  
TATAGAATATAGAATATAGAATATAGATATAGAATATAGAATATAGAATATAGAATATAGAATATAGAA  
>Ref\_dvir\_954  
ACAAAGTAGAAAGTAGAAAGTAGAAAGTAGAAAGTAGAAAGTAGAAAGTAGAAAGTAGAAAGTAGACAAA  
GTAGAAAGTAGAAAGTAGAAAGTAGAAAGTAGAAAGTAGAAAGTAGAAATTAGAAAGTAGAAAGTAGA  
AAGTAGAAAGTAGAAAGTAGAAAGTATAAAGTAGAAAGTAGAAAGTAGAAAGTATAAAGTAGAAAGTA  
GAAAGTAGAAAGTAGAAAGTAGAAAGTAGAAAGTAGAAATTATAAAGTAGAAAGTAGAAAGTAGAAAG  
TAGAAATTAGAAAGTAGAAAGTAGAAAGTAGAAAGTAGAAAGTAGAAAGTAGAAAGTAGAAAGTAGAA  
AGTATAAAGTAGAAAGTAGAAAGTAGAAAGTAGAAAGTAGAAAGTAGAAAGTAGAAATTAGAAAGTAA  
AAGTAGAAAGTAGAAAGTAGAAAGTAGAAAGTAGAAAGTAGAAAGTAGAAAGTAGAAAGTAGAAAGTA  
GAAAGTAGAAAGTAGAAATTAGAAATTAGAAATTAAAAAGTAGAAAGTAGAAAAAAACTAAAAAA  
>9\_rnd-5\_family-6515\_\_Unknown  
TGTTATTACCATTATATTTATGTTAGGAGCAGCGGTTATAGCCCNTGCCTCGCCCGTGGCAATGTATAAAA  
TAAGTTCTCTCAAAGATCTTTGAAAATGAGTGTGAAACCGTTGACGGCAAACAAACNTTTCTACAAACGT  
TTTCCGCGAATTCTGCCACCGTTGCGGGCGGAATTTCCAATACGTATTCACATTAAGTTCTGGCGGTACCC  
CATTTCTCTCAAAGGAGGAATGCATCTCTTTGAAAGGAGTGAAATACCCTTTGAATTAGTTTGAACAGCG  
ATCTTTGAAANTGAGTTTGAGGCCGATCGATGTGGTGAACAANAAATTTTATACAAACGTGTTTCGCGATT  
TTTCCACACATGCGGGTGAAATTTTCGAGCCGTCTTTACGCGCATCTACGTAAAGGGTGATACAGTANAAA  
TTTCAGCTTATCAGCTCCTACGGTTTGGGCTGTGCGTTGATCGCCAATCAGTCAGTCAGTCANTCAGTCAG  
TCAGTCAGTCAGGACAAACAGTTTTATTTTGATTTTTAT  
>Ref\_dvir\_539  
TAGAAACAACGGTCCTACTTTCCCCAGAATCTTTAGCTTCGAGACGTACCCTGTACACTGGACTCAAATC  
GCTCAGCTAGTGGCGGCTGCGCTGTCTCGTCCGGAGTAACCTGGTTCACTTCCCGCAATTGAGCATTGCA  
AATCGTGTTTACCAATATTCGACTGTGAAAGTCTCTACTGATGCTGGTAGCGTGGACTTTGGAGCAGTCTA  
TTGCAGGCCCGTACAGCAGAGGCACTCCGTCTTG CATAGACTTCGCTATCTACCAGGGAATCCCTGACCA  
GCTCCTTTCAATCGCTGACGATTGGGACCTCCCGAGCGACCACCTGGCACTGATAGTTACCCTGGAGAGC  
AGGGCCAGAGTGGTCAGCGCAATACCGAGGCTGATCAACTCACGCACTGATCTCGGTGTCTTCCAGAGAC  
AGATGAGTGATAGTATACACCTCAATACTGAAATCGGCACTGGACTGGATGTAGAGGACGCCATTGAGCT  
GCTTAACGCAAAGATTCGCGCAGCAGCAGCCACT  
>Ref\_dvir\_961  
GTGCTTCAAGGGTCCTGTCTATTTATTCTTCCAGGAGACAGTGTGGGGAATCGAACGGTGTAATCGCTCC  
TCTAAGTGCGTGGCGAAAGTTTCAGCACGTTCCAAGCTCGATCTGGCCCAGAAACCATCATCTCTTTTAT  
GGGGCTTTTGCGGACGGGCTGTCTTTTAAAGCTTTTGTCAACTGCCAGAGGCTGTATCCCGTGCTAGCAT  
CTGGGCTTGCGTCCATAAGTTTTCTGCTGAACTGCTGGTTGCTTATGGCCGCGAGGGCTTTCTGGAGCCTG  
TTGGATATCCTTCTATATATCCTGCTTACTCTTAGGTCAGCGTAGTATGTTGCATCTCCGGTTGCCAAGACA  
TCCCATCTGCAGTCAATGATGGGCTCCGGGCAAATTCTGCCCTCCCCTACAGGCTCCGGTGGTTGCCACACA  
TAAGTCTTGTGTTTCGCATTCCAATGCCCTCGTGCAATAAAATTTTTGTCTTGGTTTACTCCCAAGAGGGC  
AAAAATTTGGTTTGGTCCATGGCA  
>Ref\_dvir\_908  
GGAAGTCTTACAAGCTTTCTAAAAATGTATGTCTGACATCTGCACTCTGTAAGGTCTTAAGACTTTATCAG  
TTTTTCTCATTTTGTCTTACTTAAATTAATTTCTCCCTTATATAGGATCCCTCTTATTACATGTTTTTGTG  
TTATTTGTAGCTAAGTAAATATTTACCTGGCGAATTTTAAATTTAGGGCTCATCTGTGTGTATGCGAGTGCT  
GGGACCACATCACAGGCACAGGGACACGCCATAAACGCTGACATACCGACCCCTGGACAAGAACAAGG  
AAATTAATAAAAAACGAAGCCGAGTATAGAGTGCAAGAGTTGCTTAAAACCTTTCAATGCTTGGTTTGGT  
GTTTACACTCGCCTTTTATTAATTTTCACATGCTGAGGCAGAAGTCTGTGTCCCCTCTGAATCCTTGTATAA  
ACAAGGACGGTTTGTGACATTTCTGGATTAAAGCGAACCCAGTTTATCCCTTTGCAATCCATCGGCCAC

CTTCTACGAAAATTCAAGG  
>Ref\_dvir\_1034  
TCGTCCAAGTTGCCGTACTGGACAATGCAGTCACCAGCGCTCTCACGGTGTAAGTGTCTGCGCCTAGGATA  
CTGTCTAGTTCCTTGCAGAAAGTAGCGAAGCTAACGATATCTGGCACCGTTATTCTGGGCACCTTGGAAGA  
AGGGCGCTCATTGAGGGGCGCCGTCTGGGTGGGTGTCAGGTGCGTGGCACGCTTCTGATTAGTCATTTGTT  
GCCTGCTGGCCCTTGCGCGTGCTGCGTGCGAGGTGGATGGTTTATCGTCTAAGTCTTCATCGACACCATT  
GTGGCGTTGTTGTTGGCAGTTGGCTCTACCTCCATGTCGCTTTTCTCTTCATCGCAGAGAGCCGAGAACCG  
ATTTTGGCTGCCTTTTTGCTTCGGAGATGCTCGCCTTCTTGCGGACAATACTGGGCGAGAGTGTACCACCT  
TCTCTTTTTCTACAGGCTTATATATATGAGGGACGCCCGGTAGTCTGGGATAGGCTTAATAAGGTTTGACC  
TCATTACGTTGATTAT  
>Ref\_dvir\_948  
TATTTGTGCATTGCACAAATTGCTTTTTGAAGATGAAGGTGACAGGAATAACAGACGCCGTCTGCGTGAA  
TTTAGTGGTTTTAAATATAATGAAAACGACGCAACATTTTTGGCGAAAAGCATATACATAAAAGAAAAAT  
TGTCTGAGCATGACCTTGTATCGATTTGCACAGTTTTGGGAAAAATCACAGCGTTGAAAACATTCCGTTAC  
ATATTTTTTCGAAATTTGCTCGCCGGACAACCTGCCTCGGCACAACAATAATGCAAACAAGGGAAGCAGCGA  
CGAAGAAAATAAAGACCTTGAGAGCTGCGCGCACGGATTTGACGATTTTCGCACACGACGAAGAGGAAGT  
AGCAGAAGAAGCAACGGTTGAAAACATACGAGCAGGGCGCAGCGCGAAACACAAAGCGAAACGACGATT  
GCCGACAACGCGTCAACGAATTGCAGCACAACGCTTTGCTATAAGTTTCCGCGACGTGGAAGGGTCCGTT  
CGAGTATTTGATGGTTAGTGAA  
>9\_rnd-1\_family-482\_\_LINE\_\_I-Jockey  
CCACCTAACTAACCAACTCAATCTCTGAGCAGGGAAGATCAAGGCGGCAACAGAAAGTTTCAGTCCGATG  
GTGATGACCAATCGATATTTGGANAACCAAAGTGCCCATGGATAACTAAAGGATCCCTATCAAAAAATAA  
GGAAGAGATAGACTTAATAGCATTAAGAAGTTANATAGAGGGGGTATATATGAACATGAAATAGAGATA  
GAGATAGAGGGCTTTGCCGAAAAGAGCGTTTCTCTTAATTGTATTGTTTTTAATACTATACTAAGGATAC  
AGTACTTTCCAATCAGATGGCGGCTGACGAGAATATTAATGATCCATAAGCCTGGCAAACCTGAGGATGA  
CCCCGTGTCATACCAACCAATCAGTCTTCTTACTCCGTTACTCCGTTACTTACTCCGTTTCCAAACAATCGA  
CAAAAAAATCGATATCGATATCCTGTTTATTGGGCAATTTTTGGTAAATAATAAGAGCTAGNGTCACCAA  
ACTTGACAT  
>Ref\_dvir\_773  
AATTTCCAAATTAATAATATTCATTATTTTTATGTATTAATAAAGTTTGAAGCAAATCGGACAATAAATTCC  
AAAAATCTTTGAATCATTACCGAAGTTATTTTCAAAAATGTGAAACACGTCTCAAATGATTTTTTCATATAG  
ATCTTGAAAATAATTTGAGGCGAAACGTCACCCACCAAATCTTTGACCCCCATTTCCACCAAGGAGGAAT  
GATTTTTTCGAAAAGTGTGAAACACCCCTCAAATGAATTTGAACAAAGATCTTTGAAAATGAGTTTGAGGC  
CGATCGGATGGTAAACAAAAAAGTTTCATACAAACGTTTTTCGCGATTTTTCCACACTTGCGGGTGGAATT  
TCCCGAAACCCCGTCTTAACGTGCACCTTCATCACATAAGGTAACCTACAGTGAAAATTTACAGCTTCCTAGC  
TCTTACGGTTTGGGCTGTGCGTTGATCACCAATCAGTCAGTCAGTCAGTCAGGACAAACAGTTTTATATAT  
AGAAT  
>160\_rnd-5\_family-2375\_\_LINE\_\_I-Jockey  
AAAAGGATAAACAGCAAGCTTTCTCTGAGCAACAAGGTGCTGCTGTACAAAACCCTACTGGCCCCAGTTT  
GGCGCTATGCAAGCCAAATCTTCGGCACTGCAGCAAAATCCCATTGGGAAAATTAGTGTCTTCCAATCCA  
AGGTGCTGAGACTAAGTACTGGGGCCCCCTGGTACATCCGCAACCGGGCAAGAGACCTAAAGGTTCCCTT  
GGTGGGTGACCTCTTACGACAGCAGTCCACCAGCTACATGGCCCGTCTTTCTGCCACCCCAATATACTGG  
CAAGAAGGCTTTGCAGAAGAAAGCGACGGAGACTTCGCAGGATCCACCCCATCGACCTCCCAAGCCGGG  
TACTTAGATAGAGAAAATATAAACCAAAAAATTTAAACTTAATAGGTAATGTAAAGTATGTTCAATCCA  
TTATTGTAAAGCTAGGTTAAGATGCTCAAGCATAGTATCAACAAATTAGCTAATAAAAGAAANAAAAAAA  
AAAAA  
>Ref\_dvir\_754  
GGACCCTGGCCCTTTTTTTTCAGGGACCAACATAGCCGGCCACCTGGACCCTGGCCCTCTTGTCCCGGACCT  
CCATATCCGGCTTTTCTGGTCCAGGTCCGCCTCGACCACCTGGACCCTGGCCCTCCTGTCTTGGACCACCA  
TAGCCGGCTTTGGCCTGGCACAGGTCCGCCTCGACCGCCTGGACCCTGGCCCTCTTGGCCTGGACCTCCATA  
TCCGGCTTGTCTTGGCCCAGGTCCACCTCGACCACCTGGACCCTGACCTTCCCTTCCAGGACCACCATATC  
CGGCTTGTCTTGGCCCAGGTCCGCCTCGACCGCCTGGACCCTGGCCTTCTTGGCCTGGACCTCCATATCCG  
GCTTGTCTTGGCCCAGGTCCGCCTCGACCGCCTGGACCCTGACCCTCTTTTCCAGGACCTCCATATCCGGC  
CTGTCTTGGCCCAGGTCCGCCTCGACCGCCTGGACCCTGGCCCTCCTGTCTTGGACCACCATATCCGG



>Ref\_dvir\_637  
AGCACTTAATATTATAGCAAACGTATTGACAATATGCGAAAATTTACAATTTTATAGCGAAGCGATCGATA  
AGAGATCCGATATAGCGAACATACGAGACAAGAGTGCATTGCGGCGTCGCTAGCATTGATGCGCTAGCCG  
CTTAAGACAAAGTGCAAAGGTAAGAGAGCGCGATAACAGAACTACGATGAGCGCAAAGCGATAAGCGC  
TAGATAGTTAACAGCAAATAATATTGAGCTATTTTATGACATGCGAGAAGCGCCAAACAAAACAAAATAG  
TGACATTGCTTGCTCGCAGAATTATCCAGACGATTAATGAGCCATGTCACATCTGGTTCTGTGAACG  
TGGAATGTGCAGCCACAAACCAAAAAATAAGCTGGCGTAAGAACATCAAGGTCTTCTACATATTCTGAAA  
TCAGAAGCAGGGGTCTAGAAAATAATGACTGCCGTTATGTGGCACACAAGGGTACGAAGCTCTTCGAATC  
CCA  
>160\_rnd-5\_family-4834\_\_RC\_\_Helitron  
TCGGATTCACTATAACGTATAGNTGNTTCCCATTGNAAATGNCTAAGAAGGGTATAATGGTTTTGTGCAA  
GTGTATGTAACGGGCAGTAGAAAGCATCCCCGACCCACAAAGTATATATATTCTTGATCAGCATCAACAG  
TCGAGTCGAACTAGCCGTGTCCGACTGCCTGTCTGTCTGTCAGAGCGAATGTATGAACGCAAAGATCTCAG  
AACCAAAAGGAGATAGAGATTTGAATCCTGGCACGTAGGTTTGCTTCCGATNATCGATAACTTGCCCCGT  
TTGCANGAAATCGATAAAAATCGATATCGAAATGCTGTTTTTTGAGNAAANCTTGAATATTTTANAAGCT  
AGACACTCCAACTTGACAAGTTGCNGANCAGAATTCTNGNATATANATGTCAAATNTATTNNATTTTAA  
GCCTTTNNTGCATNCTGNTNTTTTAGTTTCAGTTTTTTTTTCAGCATTTACATAGTTCATTATACGACACAGT  
>Ref\_dvir\_529  
GCACCAAAAATAAATTATTGAACTTAACCTAAAAATTATTTTGACCTACAGAGCATACGTCCGTTGACTTG  
GACTGACGCTCACAGACTTCAACATATGTCGCAAATTCCGCTGTTACTAAGCGTGCAAATTCAAAGCTCA  
ATAGAATTACGAAATACAAGAAAATAAGATAACTTAAAGTAACAGGACTGAATGCTCGAGCGCTTGAGA  
GAGCCACTAAATTCAACTCAACTCAACCGTGATAGCGCGTGATCTATTGAGTGATAAGACATTACTGAAA  
TGCGGCTGATCTAAGCGCAGGTGCATTTTCGTTAATCGCTCTTTTCATGCGCTCTCTTATAATATCCGCTAT  
TAGGCTGGCGCGATTGCTCTTGCTGATAGGCTGTAGCCCAATCCCCCCTTCGATAATTGCAGCATTCATCA  
TCAAATTTACGTCCCGCAAAGCATATGTCAGATTCTCGGGGCTTGGTACTTAAGCGTTAACTTGAA  
>Ref\_dvir\_784  
GTGTTTGTGTTGTTGTTGTTGTTGCTTGTTAGTTTGTGTTGTTGTTGTTGTTGTTGTTGTTGTTGTTGTT  
GTTTGTGTTGTTGTTGTTGTTGTTGTTGTTGTTGTTGTTGTTGTTGTTGTTGTTGTTGTTGTTGTTGTT  
TGTTTGTGTTGTTGTTGTTGTTGTTGTTGTTGTTGTTGTTGTTGTTGTTGTTGTTGTTGTTGTTGTT  
TTGTTTGTGTTGTTGTTGTTGTTGTTGTTGTTGTTGTTGTTGTTGTTGTTGTTGTTGTTGTTGTTGTT  
TTTGTGTTGTTGTTGTTGTTGTTGTTGTTGTTGTTGTTGTTGTTGTTGTTGTTGTTGTTGTTGTTGTT  
GTTTGTGTTGTTGTTGTTGTTGTTGTTGTTGTTGTTGTTGTTGTTGTTGTTGTTGTTGTTGTTGTT  
TGTTTGTGTTGTTGTTGTTGTTGTTGTTGTTGTTGTTGTTGTTGTTGTTGTTGTTGTTGTTGTTGTT  
>160\_rnd-6\_family-731\_\_RC\_\_Helitron  
TTGAGAATTGACTAAAAGGGGTATAACAGGCAGAAGCAGGCCATAGAGCATATAAGTTCTAGCTACCTTC  
TCCATTTTCATAATATCGATAAATATCGATTTCATGCGTGCTTTTNAAGCATANCTCGAGGATTATNAG  
AGCTAGATACACCAAACCTTGATATGTAGGTTCTCGTATAGCATACACAGATNAAGAATATTTCACTTATCG  
AATANCTCCCATTTTTAAAAANTTCGAAAAATTGCAATCCTTAACGCATGCATNTACACACGTTTTGTATG  
CCATATTGGANCTCTGAAAATTTTCATNAAGATCGGACAATAAGCACCGAAGTTANTCAGGAATGCATTTA  
TCCATTGTGTGGGGCTAACAGGAAGAAGAAGCACAGCTCGCAGCATGCATTTGTGTATATGTGCGAAGNT  
TGGCTTCAGGGTATCTNCTAGTCGNGCACTGCCCACTAGAGACTNCGTTTGTTTCTTTTT  
>Ref\_dvir\_989  
TTTATGTCTAGCGTGGTCACAAGGCAATACTTTTTGGATCCGCCGCGCCATCGCGTGCCTTCTATGGCCTTC  
CATGCCGTGCCCGCTACCAATTTGATTTCGACAGCGCTCTTCTGTTTACGGAAGCCGAAGTCTGGTCAGAG  
AGTCCGTGGCGATCAGCGATCTCCTTCTCTCGCAGATGATGCGCTCAAACAGCTTGCCCATGGCGTCCAGC  
ATGCAGAGTGACCTGTATGCCGTGGAGGGTTGTGGCGTAGCTCTATCTGGTGCGGGAACAATGTCTCACT  
ATCTGCTTTAGATGCTCTGCTTCGTCGCAGAGTTGCACACAGCATTGCCGCTTGCTTCGCTTGATAACCTTG  
ATGAGCATAGCTCGCCGGGAGTGGTAGTCTGCGCGAGATCCTTCGGATCCGGGCTCCAGGGCCAGATTTG  
CTACTTCCCACCACGCTCGCCTTGCTGCGCGCTGGTATATACACCTCGCCTGTGTG  
>Ref\_dvir\_469  
TATGTCGTTTCAAAACGACATATCTCCAAGATCTCCAGGATTCAAGAAGATATGTCGTTTTAAAACGACAT  
ATCTCCATGATCTCCGTCAAGAAGATATGTCGTTTCAAAACGACTCTCCATGATCTCCGGGATTCAAGAAG  
ATATGTCGTTTCAAAACGACATATCTCCATGATCTCCGGGATTCAAGAAGATATGTCGTTTCAAAACGACA  
TATCTCCATGATCTCCGGGATTCAAGAAGATATGTCGTTTCAAAACGACATATCTCCATGATCTCCGGGAT

TCAAGAAGATATGTCGTTTCAAAACGACATATCTCCATCTCCGGGATTCAAGAAGATATGTCGTTTCAAAA  
CGACATATCTCCATGATCTCCGGGATTCAAGAAGATATGTCGTTTAAAACGACATATCTCCCGACAGATCT  
CCATGATCTCCGGGATGCAAGAAGACATGACGGTGTCCAAACGACATACCTCC

>Ref\_dvir\_549

TCTGAAGTAGTGGACCTGGACAACCTGACCATCAAATCCAACCGACTATGCGACTCCTAGCCAATGATGT  
GCACATACAGGCCATCATAAAGAACTGGAAGAACAAAAAATCCAATTCTATTCATACCAGCTGCAGGA  
GGAGAAGCCCTACCGCAAAGGCCTTCACCACTCCACACTCAACCGAGAGCTCATCGACGACCTGCGGAGC  
CAGTGCCATACCGCTCTCCATGTGCACAATCCGAACAGCAAAGCCACCAAGGAGCCCATGAACATCCATT  
TCATTAACTTAAAGCCGGCGGCCAACACAAGGAGGCTCTTACCATCAGGAAGCTGTGCAAGCAGGTGGT  
CAAGGTGGAGACTGCACGAAGAAACCATGACGTGGTGCAATGCCATAGATGCCAGGAGTACGGGCACAG  
CCACATACTAAAACAAAAAATGCGGGCTCAATCAACGCACTGCCGA

>160\_rnd-6\_family-272\_\_LINE\_\_R1

CTGACTCTTACATGACTCAATTACTGAAGCGACACGGGTGCTTTAAGTCCTATCTNTNTAGGTTTAAGCAC  
GAGACGGACCCGTTTTGCACACACTGTCGCGGGGCCATAGAGGACGCAGAACACGCTCTTTTTCGTTTTGTCCC  
AGATTCTCCGCTGAACGGGAAGAGCTAAGCCAAAGTATTGGGAGACCTTTTACAGTCACTGACTTAATAG  
ATATCCTACTTAGCTCGCAAAACAATTGGGTTGCAGTAACCCACATGGCTGCAGAAATCATCAAATCCTTG  
CGTCGCGCTGAAAGACAGCGCAATTCAAGTTCTAATCTAGATAAGATCTAGAAGAGGCTTTCATGCCATN  
TCCCCTCGTGAGGTAATACTTAGCGGTNGTNCCGCGAGAGGGAAACGGAGAGTAGGTGGTGNTTTTAGTG  
GGTGAAAGTCCCACACTTTTCGGCTTTAAATGCTTT

>Ref\_dvir.37.97.centroid

CAGCTGTGTAAATATGCGAATAATCACAAATTACTATAAAAGCAATTGAATTTAGAATTAAAGTATCATT  
CAGTAACTGATCTGAACAAGATGAAGCTCAGAATAATTACACTAAGCTGTGCCGTCTTGGTCATATGCCTT  
TGCTACTTGCCGTTTGAGCAATGGACAGGACTCATCCACAGCAGCTGCATCCACTGACACAACGACGGCG  
GCTGCATCCACTGACACTACCACAGCAGCCGCATCAACCGATACCACCACAGCGGCCGCATCCACCGATA  
CCACCACAGCCGCATCCTCAACATGCGGTGGCAAGAAGAAGAGGAGGAAGCACAAGTGGAAGGTGGTGA  
GGCATCCTGGCAAGAAGATCATCAAGAGACACCGCAAAGGAAGCAGCAAATGGGACCTCAAGGGTTAAT  
TGAATAACCTACAACCGATCATATGACAAACTT

>Ref\_dvir\_354

TTTTTGATATGTTTATTGTATTGAATCAAATATGGCATTTCATTTTTATTACAACACAGTTAACTTAGGTGG  
TATTTTCGCCAAGCGTCCTGGTTGGGTCCTCAGGCTTTTTTCGTGGACAAACGTCAAAGGCGTCTTCTTTGAG  
TATGGCATCGTCACGTAGGTAGTCGGGGGCCTCTTGTCGTTGGAGGAGGTCTTAAAGGATCTTCTCTTGA  
GCCTCCTGATTACACACCTCCCAGTTGGCGCCACCGAGGTCTCTTAAGCTTCCCGGTTACAGTGTGCTGC  
AATCGGTTGTTGAGTCGGTTGGCGAATGCTTCGACTTAGTAGCCAGTTGGCCTTGGCCATCTTAAACGGC  
ACTGCTTGAGAAGGCCGTCGATGTGCGCCCGAAAGGTAAGCCTCTTATCCAGTACATTTCCAAGATACTTG  
GCGCTTCCAGACTGCTGGACCA

>Ref\_dvir\_809

ATGTCGTTTCAAAACATATTTCCGCCGAGATTTGGCGAGATTATGTCGTTTTAAAGCGACATATCTCCGCC  
GAGATTTGGCGAGATTATGTCGTTTTAAAGCGACATATCTCCGTTTGAGATTATGTCGTTTTAAAGCGACA  
TATCTCCGTCGAGATTATGTTCTTTTTAAAGCGACATATCTCCGCCGAGATTTGGCGAGATTATGTCGTTTT  
AAAGCGACATATCTCCGCCGAGATTTGGCGAGATTATGTCGTTTTAAAGCGACATATCTCCGCTTTGAGAT  
TATGTCGTTTTAAAGCGACATATCTCGAAATTATGTCGTTTTAAAGCGACATATCTCCTTTGACCCTAATA  
AATGTATGTCGTTTTAAACACCTAAATCCCGGCGAAATTATGTCGTTTTGAAACGACAGATTTTATTAT  
AATTAAGGATGCGAGGCTAACA

>9\_rnd-6\_family-1053\_\_LINE\_\_Penelope

AACCAAATACCATGTGGCGGGGAAAACCACAACAAGTCTTTACATAGGTAAAACAAAATCGAAACTAAA  
AACAAGGATCAGTCAACATAAATCGGACTTCAAATTAAGACATCAAAATAATATACAAGAAAACAGCAC  
TAATGACCCACTGCATGAGAAGCAACCACACGCCAAATTTTAAGAACACAACAATCTTACAACAAGAACA  
NCTCTACAAACAAACGACACAAATTGGAAATGCTACACATAATTTACACACCCACCAACAAACGACTAAA  
CTACAAGACAGACACAGAAAACCTGCGCTCACTTGTACAGACATCTTTTAAACAGCCAAACAGCCTCAGTT  
TGAATCTCCTTCTCGTATGTAAAATGTTCAAATTGATGTTTATCTGTAATCAAATTGTTAATTGTTTTTTGT  
ATCTTGGTGTTAGTGCCCTGAA

>9\_rnd-3\_family-167\_\_Unknown

TTTTCTATATATAAAACTGTTTGTCTGACTGACTGACTGACTGATTGCACGATAGGAATTCACCCGCACG  
TGTGGAAAAATCGCGAAAAACGTTTGTATGAAANTTTTTTGCTTACCATCCGATCGGCTTCAAAATCATT

TCAAAGATCTTTGTGAGAATTTATTTGATACGTTCTTGGGTGGCAAATGCGGGTCAAGGGTTTAATAAACG  
AAAGTTTATTCTTCAGCTTCAAGATTCTCACCGCAAGACTAACATGGGCGGAAACCGTTGATTCCAACACT  
CGTTCTTTATTCGATGCACTTNAACATATTTTTAAATATATTTNGTGGAAAGGAAACATCTANAATTTT  
AGCACAAAACGTTNCACGGGCAAGGCCGGGCAATACCCGCTAGTTATNTATAAGGCAAGTGTACAGGTTG  
ATATGTTGTAAAGC

>9\_rnd-1\_family-165\_\_LTR\_\_Gypsy  
AAATAATTAANTTCATTAATAACTACACTATAATGTTACGTTATTTCTCTAAAAAGGGAGGTGTAGTGTG  
TATATGCCTTAAAAGAACACCCCTATATACAAATATAAAGTATGCGGCACCTTTGTTCGCATACAATAACAATT  
ATACATTAAACAAGCCCAGAGCCACTTTATATATTGGCTCTGGCTCATATTACGCAGCGCAGTTCCTAGC  
CTCTCTAGCTGACCGTTTATGCTTACGCTGCATTTCCACGCTCCGTCTGAGCGCATTCCATGAGCAACAT  
ATATGCTCACTAACACAGGCATATGCAAGCTACTCACTCTCCCTCTCTTTGTAGCTGTTAACCAATAACAG  
CATAAGTATATACATGTATCCATAGGCTAAGCGCAATATTTTACTTTGAATAAATTCATTTCGATTTCAATA  
ACCAAA

>Ref\_dvir\_1028  
TTTTAATTTTGAAACGGTCGTTATATTATGACGAGCCAACGTCATGAATAACCTATCGAGCAACTTCCTCA  
TAATAACGTCTTTAACTGTGTTCTTTAATGCATTTGTATACAACATGGTATTCATCTGATTGTCTTCTAGTA  
TTAACTTATTAGATATGACAAATGACTTATATTCTAGTTCTTCTAGAACTTACGAATACTTCCGGTAAAT  
GGGGTATTGTAGATTCTTCTAAAGAGCTCTTCGCATGGCGTCTGCGTTTTGAAGTCTAAGATGAGCGCCGA  
CCTCAATTTCGGCCAAGGTGTTGGCAGCGGATAGCTGCATGATCCTCTGCGCGTCTCTTCTCTATTGTCATTT  
GATGGCTGCGAACAGGAAAGCTGTGTTGGCGAATATCCCTCGTTGGGTATAGCTTCATGAAGAAGTCGAT  
GCG

>160\_rnd-5\_family-4235\_\_RC\_\_Helitron  
TGCCNACTGGGCGATACTCTCGGTTATATAATTTTTATACCCTGTACCCATTGAAAATGCGTATAAGGGT  
ATATTGCGTTTGCAATGTATGTAACAGGCAGAAGGAAGCATCTCCGACCCCATAAAGTATATATATTTTTG  
ATCAGCATCAANAGCCGAGTCGATNTAGCCATGTCCGTCTGTATNTCTGTCTGTCTGTTNTTNTGTCCGTA  
TGTATGAACGCAAGGATCTCAGAACATATAAGAGCTAGAGACTTTAAGTCCCAAACTTGACATATAGCT  
TCTAAAATAGAATATATATATGCATTTGATGTTGGAAAATGAGAAAATGAAAATGACTAGAACCTCCTAC  
TTGTTTTATTTAAACAAGTTTAGGAGTATGTAACGCTACATAAGAAAATATAGAGAATAACTT

>9\_rnd-1\_family-317\_\_LINE\_\_CR1  
CAGAGTGTTAAATTGCGAGTGACTCAAGCGGACGAAAAAACCGGCGCACAGAAAATAAGCAAGCGATCG  
AAATTCGAGTGAGAACTATGCGACACATTGCCCAGCATAACACCCACACAAACACGTGTGCGCNCAGAG  
ATGCGCCAGAGCCAGAGATAAGCAGTCACCTGTTTGTGTGGGTGTTTCGCTGTCATTTATCTNCTTGCGCTC  
ACGCGCTCACGACTTTTTTGGTGCTGATCGCTGATTGGTCCAATCAATANGAGCTTGCAATTGANGTTCTCG  
TCTGNTCGTTTCGCGTGCTCTATTTTCTGAGCGCCGGTTTTATGGACCTGCGCAACTTTATTCTGAGTTAGTG  
TGGCCCCGTTAGTCGACATGGCATGTTGCCATGCTGCGAGTTATAGTCTATTAA

>Ref\_dvir\_436  
CATACATACATACAACTACATACATACATACATACATACATACATACATACATACATACATACATACAT  
ACATACATACATACATACATACATACATACATACATACATACATACATACATACATACATACATACATAC  
ATACATACATACATACATACATACATACATACATACATACATACATACATACATACATACATACATACAT  
ACATAACACATACATACATACATACATACATACATACATACATACATACATACATACATACATACATACA  
TACATACATACATACATACATACATACATACATACATACATACATACATACATACATACATACATACATAC  
ATACATACATACATACATACATACATACATACATACATACATATACATACATACATACATACATACATAC

>Ref\_dvir\_619  
GCGGACCAACACGCGAGCCTTTAAAGAGAGTCTCGCAAAATGCTCACAATGAGCTCGCATGTGAGCAG  
AAAAAGAGTTGGAGATATATTTTTATCGCAAAACACTCGCACACGAGCATTGCAGTGAGATCCTTGCGAT  
AAAAATGCGTGCACAGTAGAGAGAATGGTGTGTTGTTTTTGTTCAAATGTTAATCGTGCTCAGAAAGTAC  
AACATTGTCATGAGAGCGAAAGAGTAAAAACGAAGTGGCATTTCGGATGCTGTGTTTTTTTTATAGTCTTTT  
CCTACTTCCCTTAAAAGATTTTTTTAAAAAATAAAATAAAATACATTAAGTTTTGTTTTAAAT  
AGTTATAAAATTATTTTATATTATGCATTCACTTTTTTATAATTATAACATT

>9\_rnd-3\_family-137\_\_RC\_\_Helitron  
ATATCGATAAATATCGATTTTGAGACATGNTTTTTTAAGCATAACTCGAGAACTATAAGAGCTANNTNCAC  
CAAATTTGGTATGTAGGCTCTCGTATAGTATACACAGATTAAAGAATATTTCACTTTTTGATAGCTCCTCCTT  
GGAAAGGGAAAAAGCTCATTTTAAAAGCTAGAGCCTTGCGCTTTGGTATATACACACATTTNTATGCCAT  
ATTTAAGCACTGAAAATTTTCATAAAGATCGGACCAAGTTAATCGAGATGCGCGTAGAAGTGCGGGGCTAG

GANACGTANGCATAGAAGGAAGCTGGAATTGTGTCAGGGTATCTNCTAGTCGNGCACTCCCGNTTGGAGAC  
GTTNGTTNGCATANTTTTTNGCTGAAATTGAACTTTGTATTTGCACA  
>Ref\_dvir\_778  
AAAAAGACAATAATCTCCCGAAGGAATTTTTTTGGAGATATGTCGCTATAAAACGACATAATCTCGCCAA  
CGGCGGAGCTATGTCGCTTTAAAACGACATAATCTCGCCCCGAGAAATGTCGTTGCGGAGATATGTCGCT  
TTAAAACGACATAATCTCGCCAGGATCTACGGTGGAGATATGTCGCTATAAAACGACATAATCTCTTCTG  
GAGGAGTTAGTTGGAGCTATGTCGCTATAATCTCGCGAAGGAGTTATCTCGGCGGAGATATGTCGCCATA  
AAACGGCATAATCTCGCCAAGGAGTTATCTCGGCGGAAATATGTCGCTATAAAACGACATAATCTCGCGA  
AGGAGTTATCTCGGCGGAAATATGGCGTTATAATCTCGACATAATTTTCG  
>Ref\_dvir\_671  
GGGGACCAACCATGAAGATTCCCTTCTACCGCCACCAATTGGGATTGTCTTTAAATCCTATCTCTTTAGGT  
TTAGGCATGAGACGGATCCGTTTTGCACACACTGTGCGCGGACCATAGAGGACGCAGAACACGTCTTTTT  
TGGCTGTCCCAGATTTTCTGCTGAACGGGAAGAGCTAAGCCAAAGTATTGGGAGAAATTTTACAGTCACT  
GACTTAATAGATATCCTACTTAGCTCGCAAAACAATTGGGCTGCAGTAACCCCATGGCTGCAGACTGAAA  
GACAGCGCTTCAAGTTCTAACTCTAGATAAGATCCTAGAAGAGGCTGGTGTGGTAATTCCGCGAGAGGGA  
AACGGAGAGTAGGTGGTGGTTTTAGTGGGTCACACTTTTCGGC  
>Ref\_dvir\_1041  
CTTATATATAATAACTAACAACCTGCCGCGATTTTTGTATTCAAGCAAGCGAACAATTTCTTGTTGCAATAA  
GATATTTTTTTGGCGCAGTTCACATAGTTACCAGGAGAACGTTTGAACAAAACGCTATTTTATGTATGAAA  
TATTATTAATTGTCAATATGTGTTGAAACATTTTTATTTTCGGAGGCAGTATTTACGTGCCTTGAATTTTT  
TTGGGTGAATCATTGAAGTTGAGATTGAAAAATCAGTTCATAGTGTTGTGCGTGCTTAGGAACAGACAGT  
CATATAGACTCTACTAAGAGTAAGAGGAAGACTAACTCGGATTATCTCTGTTAACCACAATAAAAAAATC  
TCGTGCTATCTTTTAAAACATACATTTGCCCTACTCTA  
>Ref\_dvir\_1043  
AAATATTATTTTATCCAAGTGTTACGCAGTTGGTGACAAAGTGGAATACCCTCTTTAATTCGGTAAATCA  
GATCATAAATGTAAGCATACTTTGGATTTTTTATTTGTTTATTCTGAAGCCACAGCCGAAAAAAATTGTA  
TATTAATGCGGAAATTCAAATCGTTATAAAATGGGCAGACCGAGCCCCAGTTTGACATTCACATCCA  
ACACTCGCTCTAGCATCGAAATGAAATTCCAAACGGTGATCTTTGGCTGTGCCATTTTGGCCACTTGCCTG  
ATTAGAGGCAGCAATGCGGCATGTGCAACAGCCCGGCATAAACCTGCACTGCACACGAATGCGCAGACG  
CTGCCAATGCAGCAGAACCTAGCTGTGCCAACACGACC  
>Ref\_dvir\_1000  
CCTCCACGCGGATGGGCGGAAGGAATCAGGGGCAGATTCCGCCATGCCCGACTCATGATCCTTAACTTCC  
ACTGGGCAAGAAGTGTTGCGTCCTTAATATGGCGTTAATGATCAACGTCATAAAAAGGAGCGCGCGTATT  
GGCAGGGCCTTCAATATTCCATCATGGCCCGGTGCTTTAGCCCTGGGAAGGGCTTTGACGAGTTGATCACC  
TCCTCCACGCGGATGGGGCCGATAGGTGGTGACTCTGGGGAGGCCAATCGAATGTAACCGTTCCTCCATT  
GCTCTTCGTCTGTAAGGCAGTATGTTCCATTGTGGCGAAGAAGGGTTCTCCAGGGTTGGCGCTTCAGGTTT  
TTAGTTGCTCGCCAGAGCGAGTATCCTGAGTCATGGG  
>160\_rnd-1\_family-269\_\_LTR\_\_Gypsy  
TGTTTTGAGGAGATGCTAGTTTGCACCCCACTTCGGCCCCCTTTTATGTTTTATAAATTTTAATAAAAAATCAA  
AGGAGCCTTTAGACTGCTTGTAATGCGTGATTTACTTCTCGAACTTTCAACAATAACTATCGATAGATTAG  
TGATGAGCAATTTACAATGGTATTTTATGGTGGTTTAAAAATAATAGTATGTGACTTCAATATCGTGATT  
GAGAAGTAAAGATATATTGTAATTCAGATATAATATTATTCAGAGGGCGTTCTGCTGCGAACAGAGGCTT  
TATCAAAGATTTTGCAGCAATAGCTTGCCCACTGACCAACATTCTTAAAGGAGAAAACGGCTCCGTGAGT  
AAACACATATCCAAAAAAAATC  
>Ref\_dvir\_564  
TATGAGTATGAGTATGAGTATGAGTATGAGTATGAGTATGAGTATGAGTATGAGTATGAGTATGAGTATG  
AGTATGAGTATGAGTATGAGTATGAGTATGAGTATGAGTATGAGTATGAGTATGAGTATGAGTATGAGTA  
TGAGTATGAGTATGAGTATGAGTATGAGTATGAGTATGAGTATGAGTATGAGTATGAGTATGAGTATGAG  
TATGAGTATGAGTATGAGTATGAGTATGAGTATGAGTATGAGTATGAGTATGAGTATGAGTATGAGTATG  
AGTATGAGTATGAGTATGAGTATGAGTATGAGTATGAGTATGAGTATGAGTATGAGTATGAGTATGAGTA  
TGAGTATGAGTATGAGTATGAGTATG  
>Ref\_dvir\_397  
ATCATTATCATTATTTTCTTTCTTTCTTATCATTATCATTATCATTATCATTATCATTATCATTATCATTATCA  
TTATCATTATCATTATCATTATCATTATCATTATCATTATCATTATCATTATCATTATCATTATCATTATCAT



GCGAACAGAAATGACTAGCAGGTAGATGCACAGAAAATTTCCGCGGAGATATGTCGTTTCAAAACGACAT  
AACTCCGCCATGATAATGGTTATGTGGGATTATGTCGTTTTGAAACGACATATCTCCACCGCTCTAAAAAC  
AACATTTTTACAAGAAATTTTGCAAAAATACCAGGCGAACAGAAATGACTAGCAGGTAGATGCACAGAA  
AATTTCCGCGGAGAT

>9\_rnd-5\_family-6190\_\_Unknown  
AGTTACAACCTCAACAAATCAAAAGTGAAATTTAAATCCCGCTATCTTTTATGTTTATTAAAAACTGAACAT  
CTCAACTGAATATATCGTTCATGANCGGNTGAACTGCCGAGTTGNATGTATCGTTCATGACCGACTGAAC  
GAGTACAGAATACATCGTTCATGACCGACTGAATAGCTGAACGAGTGAACATAAATGACCGATTTAGTTCA  
CTAATCACTGAATAAGTTCAGTAGTTCATTTTAATGACCCGTTCAATCGAACTTGGTCTGAACTAAACGAC  
ACAACCTCTA

>Ref\_dvir\_923  
ATTATTATTATTATTAGTATTAGTATTAGTATTAGTATTAGTATTAGTATTAGTATTAGTATTAGTATTAGT  
ATTAGTATTAGTATTAGTATTAGTATTAGTATTATTATTAGTATTAGTATTAGTATTAGTATTAGTATTAGT  
ATTAGTATTAGTATTAGTATTAGTATTAGTATTAGTATTAGTATTAGTATTAGTATTAGTATTAGTATTAGT  
ATTAGTATTAGTATTAGTATTAGTATTAGTATTAGTATTAGTATTAGTATTAGTATTAGTATTAGTATTAGT  
ATTAGTATTAGTATTAGTATTAGTATTAGTATTAGTATTAGTATTAGTATTAGTATTAGTATTAGTATTAGT  
>160\_rnd-4\_family-600\_\_Unknown  
CTTCGCAAAGTNCGNCGCTCTTGGGTGGCAAATGCGGGTCAAAGGTTTAAACGAAAGTTTATTCTTCAGCT  
TCAAGATTCTCATCGCAAGACTAACATGGGCGGAAACCGTTGATTCCAACACTTGGTTCCTTATTTCGATGC  
ACTTAAACATATTTTTTAAATAGAAGTGAGATCAAGATGAGGTAGATTTCAATTTTCCACGGGCGTGTA  
CTTAGTGGAAGGTAATATCTAAATTTGTAGCGCGAAACGTTCCACGGCAAGGCCGGGCCAATACCCGC  
>Ref\_dvir\_1060  
AATTAGTGCATTTATAAATGCAGTTTATATGTTTTGATTATTTGCATTAAATGCAGTTGGGTACGCGTCGC  
GACTGATAAAATAATTTTTACGTCGCCGTCGCTGCCACTCGCTGTGCGACACGCCGTTGCTGCCCCCAAAA  
GTGCAGCGTTAGTGCCTCGTGTGTGGTGTGCGGACAACATAGTTGCGACATATCCGCCGCGATCATGACTCT  
GGTCATTGGCTTCCCCAGAACGCTGGGTGAGCAAATACCAATAGTCAGTGGTTAACT

>Ref\_dvir\_886  
GTGTGTGTGTGTGTGTGTGTGTGTGTGTGTGTGTGTATGCATGCATGTATGTATGTATTTATGTATATATGTAT  
GCATGCATGTTTGTTTTCTAATACCAAACGCAGACCAAGCTTATTTGTGCTGTGCTGCAAATTTAAATAA  
AACGAATTTCTACCAAGTGCTCTCCTCCTCGATTCTCAAGAATTCAAGTAGGCTCTGCAGTTTTTCATGCTT  
AGCTAGTAGTGTAGTGTTTTTTTTTTTTTTTTTTTTTTTTTTTTTTTTTTTTTTTTTTTTTTTTTTAT

>Ref\_dvir\_585  
AAAAAGGTTCTAGTCGGGAGCTCCCAGGACTAGGGGAACCCTGAACCCTTTCTTCCAACATCAAATGCTG  
ATCAAGAATATATATATTTTATTTTAGAAGCTATATGTCGGGTTTGGAGATTCTAGCTTTTATTATTTACCT  
AAATTTGCCCAAAAAACAATATATCCATATTAACATTTTCAATGGGTTCAGGTAGAAAAAATTATCA  
ATTATCGGAACAACCTCGATCTGCGCAGGACTAGGAGCACCTACATCTA

>Ref\_dvir\_769  
ATTTATTTGGGCGCGAAATCCCGGCGGTACTGCAATACCGGGCCAACCCGTGACAGAGGTGGAGCAAGCCC  
CTAGCACTCCGTCAATTTCCA AAAATCAGTTTAACATTTGTTGTTCTCCAATGGAGAACTATCAGATGTT  
AAGCTGATAAGAACAGATACTACACTTTGATCTTAGCCATAAGGCCGAGAAGCGATAACTTTACAATGGT  
AATCTCGTAATAGTACACCACCGCCAAGATAGAACCTCTTGAGAATTATA

>Ref\_dvir\_491  
AGCTAGCAAGCTAGCAAAGCTAGCAAAGTACAAAACGTACGAAACGTTACAAAACGTACAAAACGTAGC  
AGAAGTACAGAACCTACAGAACTTACAGAACTGACAAAACCTAACAAAGACTGACAAAGACTAGCAAAC  
GTAGCAAGACTAGCAAAGCTAACAAAACCTAGCAAAGCTAGCAAAGCTACCAAAGCTACGAAAGCTAAC  
GAAACGTACGAAACCTACCAAAGCTAAGAAGCGTACAAACGTACGAA

>9\_rnd-4\_family-1456\_\_Unknown  
CAATTTTACTAAATCTNAAGCCGNCCGGCTCGAGGGGTAGTATAACGCCAAGNTTGAGCAGGTTGTCTGT  
ATAGCTATTTCAAAACCTCCCGGTTCTATCATCAGCAGACTTTGCTACCGACTCTAGATTGCGAAGGCCTT  
NTNCTCAGTCCGAAGCTATAACCACTTGAGAATTATAAGCAACGAAAAGGCGACAAAGCTAGCAAAGCC  
AAAGCCTACTCTTGATGCTTACCCCTGCGGCAT

>Ref\_dvir\_653  
TTTCGATTTTCGCACCGACCTCGATTTTGAAAAAAATCGTGATGTTTTGGAAGGTCTTTTTTTTATATCTCCG  
CGCGGAGTTATGTCTGGTTTTTGGAACGTCATATCTTGTCTCGCGCGGAGTTATGTCGTTAAGTATACTTA  
CTATCAATTGGCATTCAAACAAATTTAAATCATGGGTAAAAAAGTTGTTGACCAAAACTTCTTTGTAAAGT

CAACTTTTAGATTTTTT

>9\_rnd-4\_family-800\_\_Unknown

GCCGNCNTNGAGGTCAATGTTGGTTATTTTTTAATATATTAACAACAAAAANAACGAGTTTTATCAAGAANT  
TCCCGGTTCTATCATNAGCAGACTTTGCTATCGACTCNAGGATTGCAAACGCCTTGTNCCCCTNTCGAAGC  
TTAACTTGTTGAGAATTGCAAGCGTCAAGCAACGAAAAAATACCGAAGCGAGCGTAGTCCATTTTCTGT  
GTAGTT

>Ref\_dvir\_905

ATATATAGATAGATAGATAGATAGAGATATAGAATAGATAGATAGATAGATTGATAGATAGATGGATAG  
ATAGATAGATAGATAGATAGATAGATAGATAGATAGATAGATAGATAGATAGATAGATAGATAGATA  
TAGATAGATAGATAGATAGATAGATAGATAGATAGATAGATAGATATACATATATAGATA

>Ref\_dvir\_493

TTCGTCAGTCTTCGTCAGTCTTCGTACGTCTTCGTCAGTCTTCGGTAGTCTTCGTACGTCTTCGTCAGTCTTC  
GTCAGTCTTTCGTACGTCTTCGTACGTCTTCGTCAGTCTTCGTAAGTCTTCGTACGTCTTTCGTACGTCTTCG  
TACGTCTTCGTACGGTTCTGTATTAGTTTTTCGTACGTCTCTCCTACGT

>9\_rnd-4\_family-237\_\_Unknown

GCACTTTAAACAAATAGAAGTGGAGNTCAAGATAGTACGGGTAGATTTCAATTTTCCACGGGCGTGTACT  
TAGTGGAAGGTAATATCTAAAATTTACACAAACGTTCCACGGGCAAGGCCGGGCAATACCCGCTAGTA  
TAATATATATTTTCTTAAAATTACAANAAAGTCGTTTAATAAA

>9\_rnd-1\_family-444\_\_LTR\_\_Gypsy

CCTCCGTTGAATTGAAAGCACAGTTTTTTCATTACCGTTCCGATAACAGTAGTTTCAACATTTTCAGGTTTGC  
GCTCACTTTGCTTGTGGCACTAGCAGCGGTAAATGCTCGGATCACCGACTTCTCGCACGCCGACTACATTC  
CGGTCTTAGACGGGGACATTCTACTNTGGGACA

>9\_rnd-4\_family-1717\_\_Unknown

CCCAATCATTGGATTTATCTAACCATATTTGGTAGATGCCAATTTTGGGTAGAGATCAAATTTAGCCCGCA  
ACTTCTATATGAAAATATNTACGACTTGCAATATTTTCAGTAGAACGGGCAATATTATAAAATAATGTGAG  
AAATCAAGCTTTAAATCA

>Ref\_dvir\_983

AATATATATATATATATATATATATATATATATATATATATATATATATATATATATATATATATATATA  
TATATATATATATATATATATATATATATATATATATATATATATATATATATATATATATATATATATA  
TATATA

>160\_rnd-1\_family-109\_\_Unknown

TTTATCTAACCATATTTGGTAGATGCCAATTTTGGGTAGAGATCAAATTTAGCCCGCAATTTCTATATGAA  
AATATNTACGGCTTGCAATATTTTCAGTAGAACGGGCAATTGTAAATTNAAAATTAAATTGTTTTTCAT

>Ref\_dvir\_893

AAATGTGCAATTTAATTTTAAATTTACAATTGCCCCGTTGTACTGAAAATATTGCAAGCCGTAAATATTTTC  
ATATACAAAATGCGGGCTAAATTTGATCTCTACCCAAAATTGGCATCTACCAAATATGGTT

>9\_rnd-4\_family-31\_\_Unknown

TATGNTAAANGNGCTTTATTTTTTNTGGTTTGATTTTGCGTTTGCGGACCAACCCGATCCACCTCGCGTCGG  
TTTTAAACGGTAATAAAAGCTCGGAGTGAATATTCCGCTCTTTATCTGTTTATTAA

>160\_rnd-1\_family-349\_\_LTR\_\_Gypsy

CCCCCTTAAACCCTCAATCCTAGCGAACTTATAAATGTCTTGTAAGTCGCTGGGCCTGGTGAGACTGAGAC  
TCATACCCCGGCCAATAGCTTCCTTACA

>160\_rnd-1\_family-177\_\_Unknown

ATTCAATTTTNNATTTACAATTGCCCCGTTGTACTGAAAATATTGCAAGCCGTAAATATTTTCATATACAAG  
ATGCGGGCTANATTTGAT
